# Supplementary material
Source: publisher site journal article supplement (https://www.dovepress.com/article/440295)
Supplement: Supplementary file 1 [file get_supplementary_file.php]

## Supplementary information

### **Integrative analyses of pyrimidine salvage pathway-related genes revealing the associations between UPP1 and tumor microenvironment**

Yin Li<sup>1,#</sup>, Manling Jiang<sup>2,3,#</sup>, Yongqi Wei<sup>1,#</sup>, Xiang He<sup>2</sup>, Guoping Li<sup>2,#</sup>, Chunlai Lu<sup>1,\*</sup>, Di Ge<sup>1,\*</sup>

<sup>1</sup>Department of Thoracic Surgery, Zhongshan Hospital, Fudan University, Shanghai, China

<sup>2</sup>Laboratory of Allergy and Precision Medicine, Chengdu Institute of Respiratory Health, Affiliated Hospital of Southwest Jiaotong University, The Third People's Hospital of Chengdu, Chengdu, Sichuan, China

<sup>3</sup>State Key Laboratory of Quality Research in Chinese Medicine, Macau University of Science & Technology, Taipa, Macao Special Administrative Region of China

<sup>#</sup>These authors contributed equally

<sup>\*</sup>Corresponding author

## Supplementary Figures

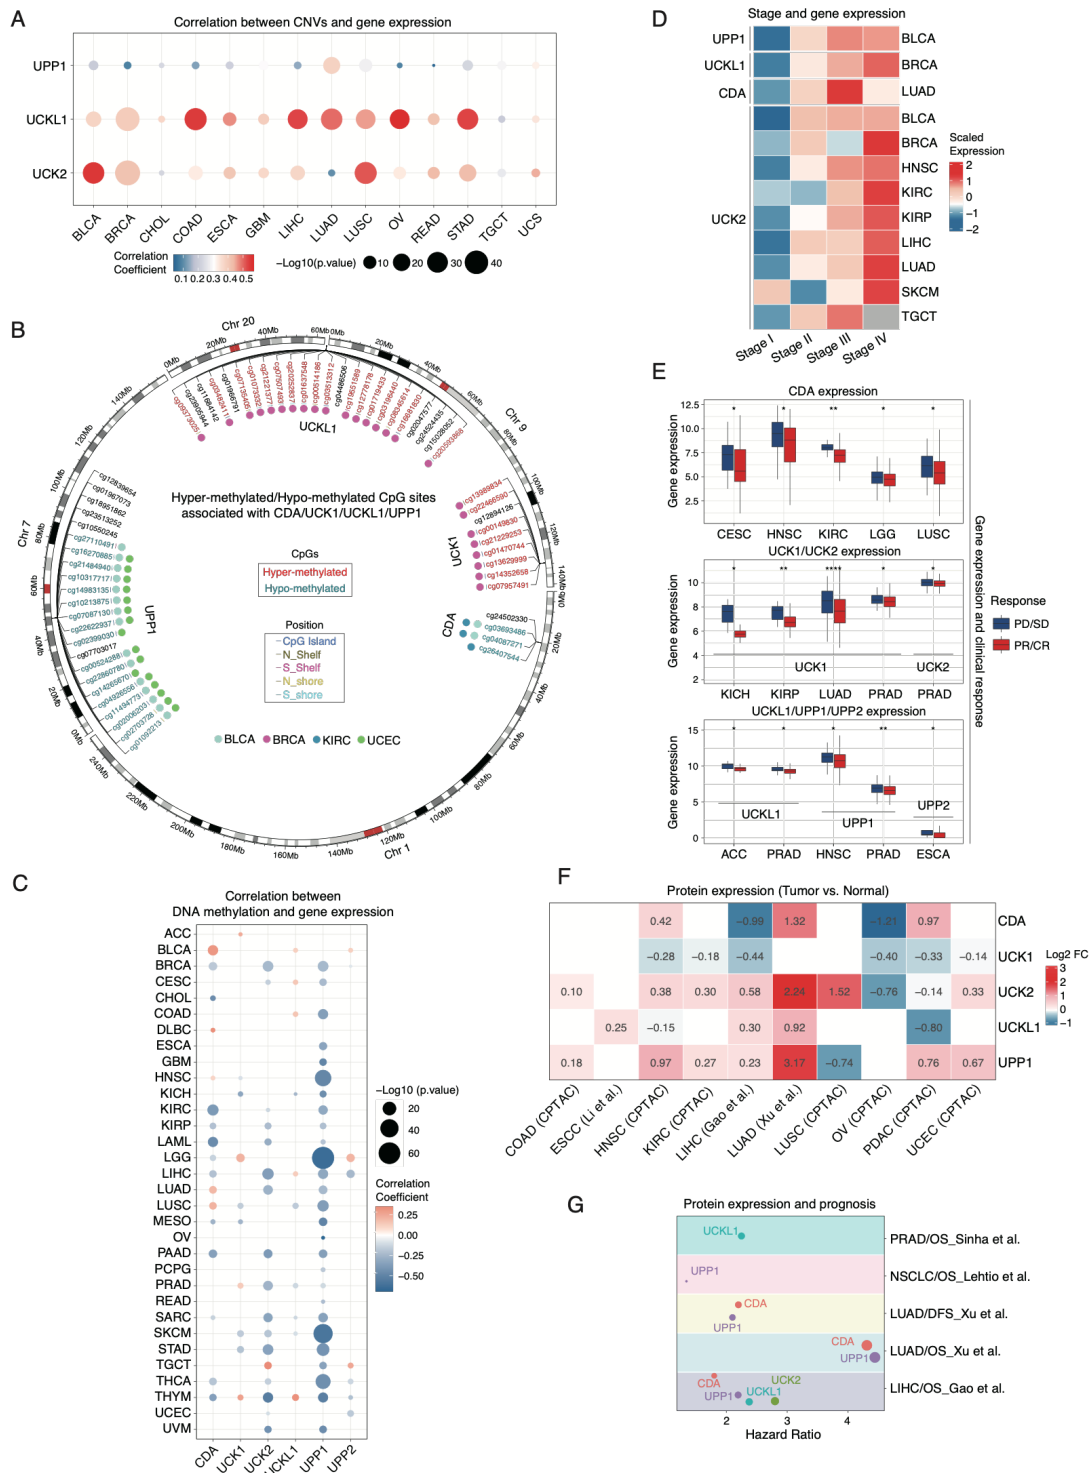

**Figure S1. Comprehensive analysis of PSPG.**

A. Pearson correlation analysis between copy number variations and gene expression ( $p < 0.05$ ).

B. Specific sites of aberrant methylation in CDA/UCK1/UCKL1/UPP1 in tumor samples. Red methylation sites represent significantly hypermethylated sites, while blue sites represent

significantly hypomethylated sites. The dots above the methylation sites represent different types of tumors, and the lines above represent the specific locations of methylation sites.

C. Pearson correlation analysis between DNA methylation and gene expression ( $p < 0.05$ ).

D. PSPGs significantly correlated with clinical stages ( $p < 0.05$ ). Statistical analysis was conducted using the two-tailed Kruskal-Wallis test.

E. PSPGs significantly correlated with clinical drug treatment (\*:  $p < 0.05$ ; \*\*:  $p < 0.01$ ; \*\*\*:  $p < 0.001$ ; \*\*\*\*:  $p < 0.0001$ ). Statistical analysis was conducted using the two-tailed Wilcoxon rank-sum test.

F. Changes in protein expression of PSPGs. Red indicated up-regulation, blue indicated down-regulation, only genes with  $p < 0.05$  were shown. Statistical analysis was conducted using the two-tailed Wilcoxon rank-sum test.

G. Association between PSPG protein expression and patient prognosis. The x-axis represents the hazard ratio, with values greater than 1 associated with poor patient prognosis. All displayed PSPGs were associated with poor patient prognosis ( $p < 0.05$ ).

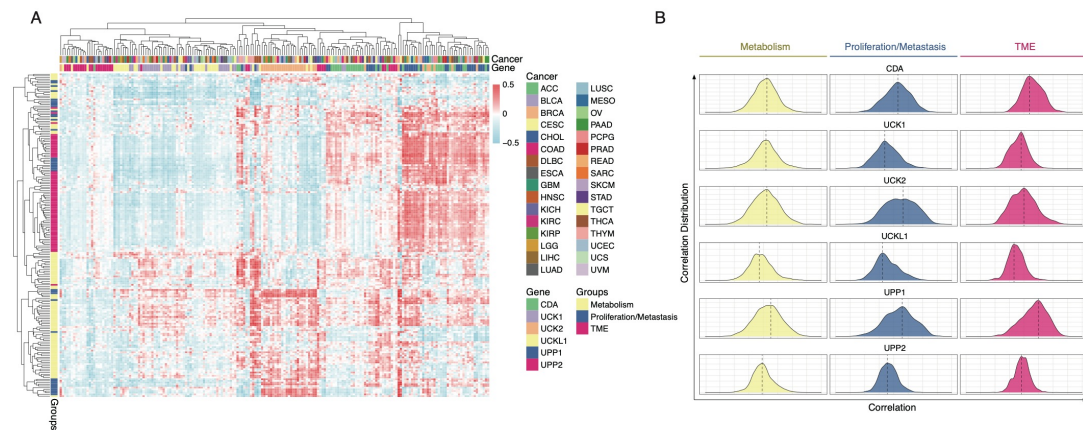

**Figure S2. Correlation of PSPGs with tumor-related biological characteristics.**

A. Heatmap displaying the overall correlation of PSPGs with tumor-related biological features.

B. Density plot of the correlation distribution between PSPGs and tumor-related biological features.

The dashed line represents the median correlation of overall features. UCK2 shows the highest correlation with proliferation and metastasis-related biological processes, while UPP1 has the highest correlation with TME.

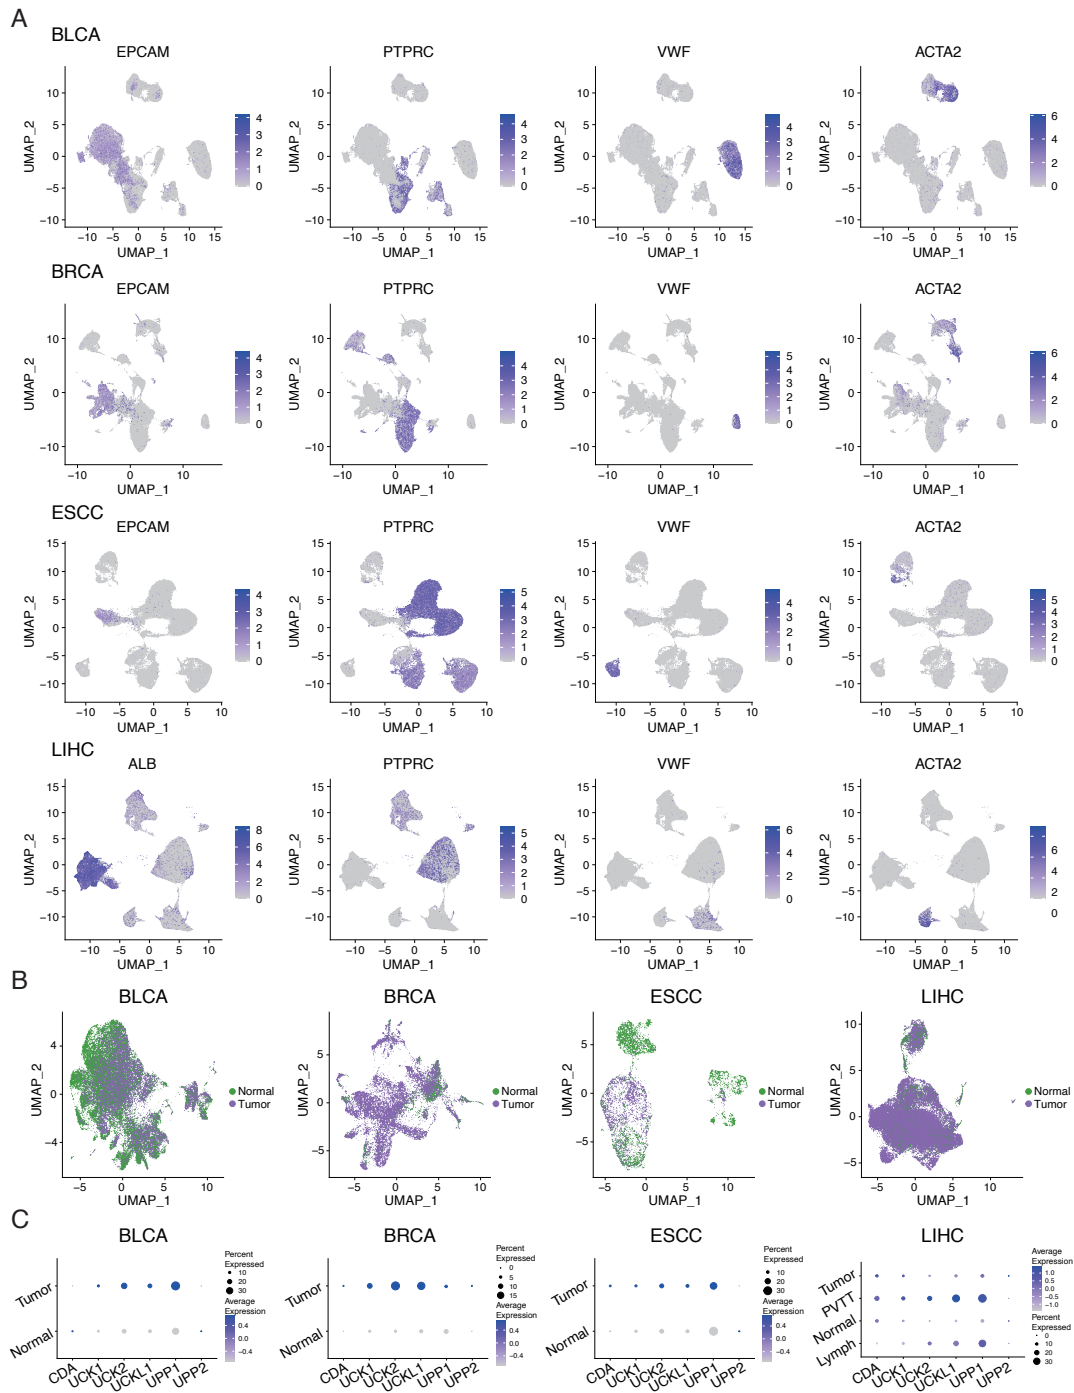

**Figure S3. Cell-type-specific marker expression and PSPGs expression differences between tumor and normal cells.**

A. UMAP visualization showing the expression of immune cell markers, epithelial cell (hepatocyte) markers, fibroblast markers, and endothelial cell markers.

B. Identification of tumor cells and normal cells based on inferCNV.

C. Comparison of PSPGs expression differences between tumor cells and normal cells.

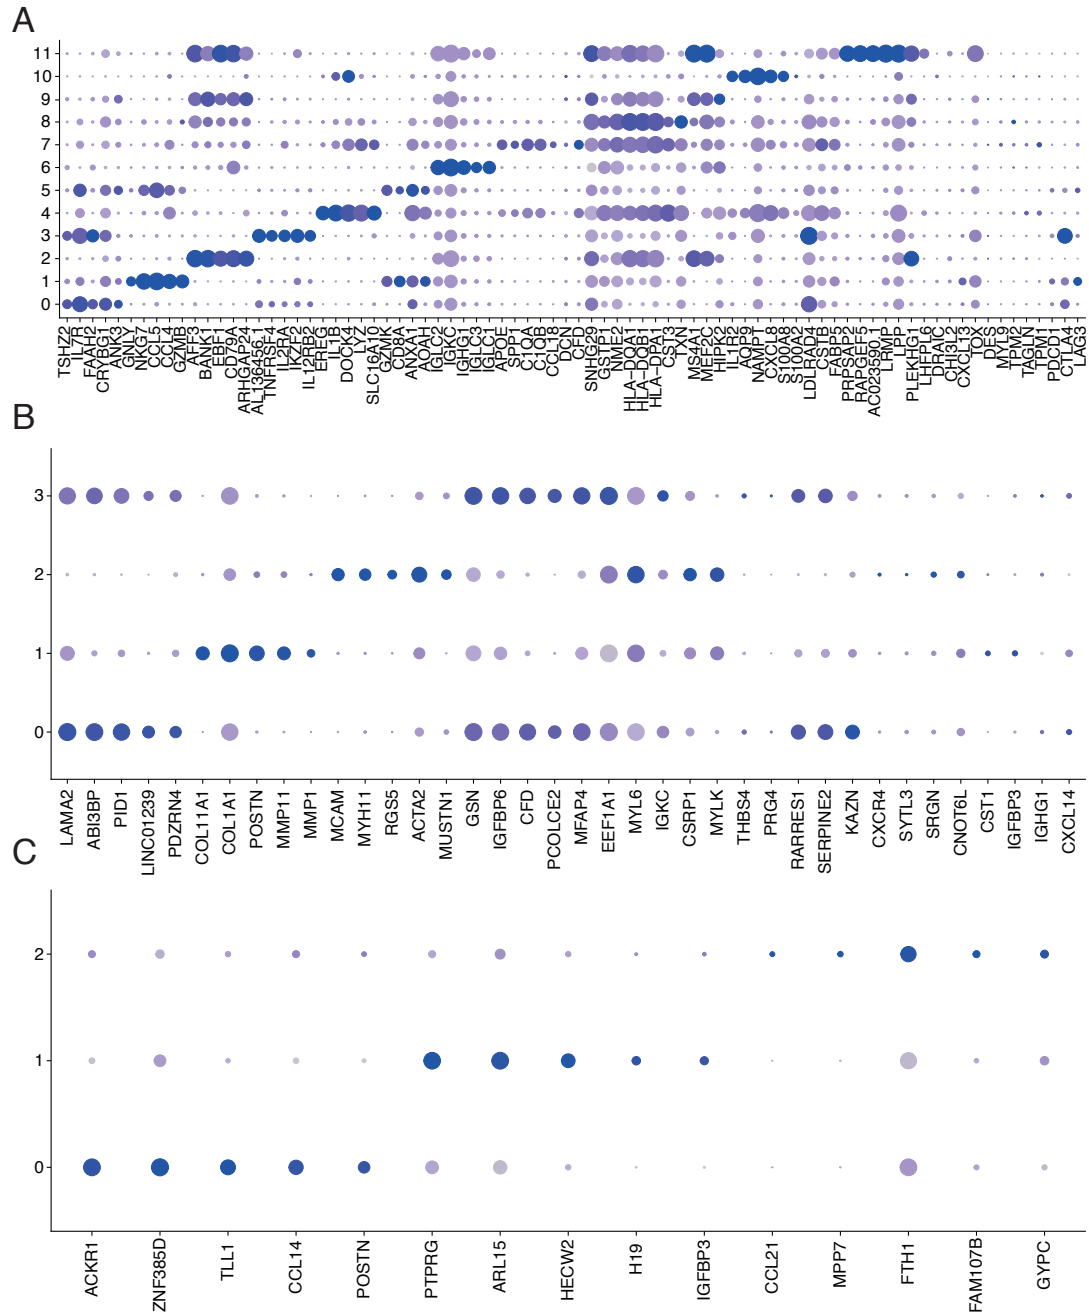

**Figure S4. Top 5 differentially expressed genes in each identified cell subgroup in ESCC single-cell sequencing data.**

A. Immune cells.

B. Fibroblasts.

C. Endothelial cells.

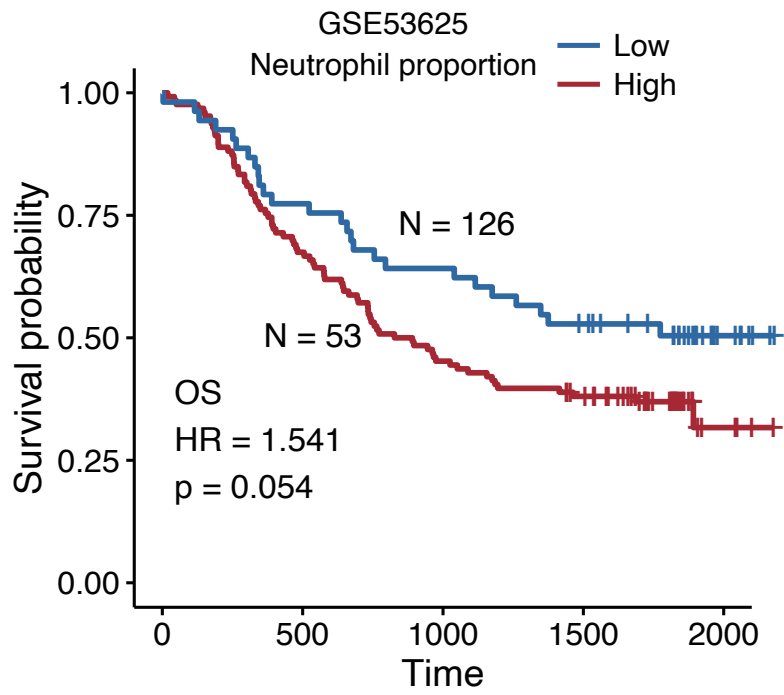

Figure S5. Analysis of the association between neutrophils and patient prognosis in the GSE53625 cohort. Statistical analysis was conducted using log-rank tests.

**Table S1: siRNA sequence and primers.**

| siRNA         | sense (5'-3')            |
|---------------|--------------------------|
| UPP1          | GCUCCAACGUCACUAUCAUTT    |
| Primers       | (5'-3')                  |
| GAPDH-Forward | AGGTCGGAGTCAACGGATTTGG   |
| GAPDH-Reverse | TGCCATGGGTGGAATCATATTGG  |
| UPP1-Forward  | TGATTGCCCGTCAGACTTTT     |
| UPP1-Reverse  | CACCAACGCACCTGATGAAG     |
| TGFB1Forward  | CACCAACTATTGCTTCAGCTCCAC |
| TGFB1-Reverse | TCCTTGCGGAAGTCAATGTACAGC |
| CCL2-Forward  | CAGCCAGATGCAATCAATGCC    |
| CCL2-Reverse  | TGGAATCCTGAACCCACTTCT    |
| CCL3-Forward  | TGGCTCTCTGCAA CCAGTTCTC  |
| CCL3-Reverse  | CGAAGCTTCTGGACCCCTCA     |
| CCL4-Forward  | GTCTGTGCTGATCCCAGTGA     |
| CCL4-Reverse  | GCGGAGAGGAGTCCTGAGTA     |
| CCL5-Forward  | TGCTGCTTTGCCTACATTGC     |
| CCL5-Reverse  | CCTTGACCTGTGGACGACTG     |
| CCL26-Forward | GAGAAGTGGGAAGCCCAGATG    |
| CCL26-Reverse | TATGAGACTGAGACGGCCCC     |
| CXCL3-Forward | GCCCAAACCGAAGTCATAGC     |
| CXCL3-Reverse | CCCTGCAGGAAGTGTCAATG     |
| VEGFB-Forward | CACCAAGTCCGGATGCAGAT     |
| VEGFB-Reverse | GGAGTGGGATGGGTGATGTC     |
| IL1A-Forward  | AGATGCCTGAGATACCCAAAACC  |
| IL1A-Reverse  | CCAAGCACACCCAGTAGTCT     |
| IL1B-Forward  | GAAGTCAAAGCTCTCCACCTCCAG |
| IL1B-Reverse  | AAAGGACATGGAGAACACCACTTG |
| IL6-Forward   | GCAGAAAACAACCTGAACCTTC   |
| IL6-Reverse   | ACCTCAAACCTCCAAAAGACCAG  |
| IL11-Forward  | AGCGGACAGGGAAGGGTTAAAG   |
| IL11-Reverse  | GGCGGCAAACACAGTTCATGTC   |
| IL18-Forward  | ATCGCTTCCTCTCGCAACAAAC   |
| IL18-Reverse  | TCTTCTACTGGTTCAGCAGCCATC |
| IL32-Forward  | CTCTCTCGGCTGAGTATTTGTG   |
| IL32-Reverse  | GCTCGACATCACCTGTCCAC     |

antisense (5'-3')  
AUGAUAGUGACGUUGGAGCTT



**Table S2: Genetic Features of PSPGs in TCGA**

Sheet1: Mutation frequency of PSPGs in TCGA

Sheet2: CNVs (Copy Number Variations) of PSPGs in TCGA

Sheet3: DNA methylation features of PSPGs in TCGA

Sheet1: Mutation frequency of PSPGs in TCGA

|      | CDA         | UCK1        | UCK2        | UCKL1       | UPP1        | UPP2        |
|------|-------------|-------------|-------------|-------------|-------------|-------------|
| ACC  |             | 0           | 0           | 0.010869565 | 0           | 0           |
| BLCA | 0.004878049 | 0.004878049 |             | 0           | 0.014634146 | 0           |
| BRCA | 0.001264223 | 0.001264223 | 0.002528445 | 0.001264223 | 0.003792668 | 0.001264223 |
| CESC |             | 0           | 0.003460208 | 0.01384083  |             | 0           |
| CHOL |             | 0           |             | 0           | 0.027777778 | 0           |
| COAD |             | 0           | 0.003448276 | 0.006896552 | 0.024137931 | 0.020689655 |
| DLBC |             | 0           |             | 0           | 0.027027027 | 0           |
| ESCA |             | 0           | 0           | 0.005434783 | 0.010869565 | 0.005434783 |
| GBM  | 0.006369427 |             | 0           | 0           | 0.006369427 | 0.00955414  |
| HNSC |             | 0           | 0.00591716  | 0.01183432  | 0.00591716  | 0.00591716  |
| KICH |             | 0           |             | 0           | 0           | 0.015151515 |
| KIRC |             | 0           | 0.002717391 | 0.002717391 |             | 0           |
| KIRP |             | 0           |             | 0           | 0           | 0.003558719 |
| LGG  |             | 0           | 0.005870841 |             | 0.001956947 | 0.001956947 |
| LIHC | 0.008264463 |             | 0           | 0.002754821 | 0.002754821 | 0.005509642 |
| LUAD | 0.003898635 |             | 0           | 0.019493177 | 0.001949318 | 0.011695906 |
| LUSC | 0.002083333 | 0.002083333 | 0.00625     | 0.004166667 |             | 0.00625     |
| MESO |             | 0           |             | 0           | 0           | 0           |
| OV   |             | 0           |             | 0           | 0           | 0           |
| PAAD |             | 0           |             | 0           | 0           | 0           |
| PCPG |             | 0           |             | 0           | 0           | 0           |
| PRAD |             | 0           | 0.002020202 |             | 0           | 0.004040404 |
| READ | 0.011111111 | 0.011111111 |             | 0           | 0.011111111 | 0           |
| SARC |             | 0           | 0.004237288 |             | 0           | 0.004237288 |
| SKCM | 0.009615385 |             | 0           | 0.009615385 | 0.019230769 | 0.009615385 |
| STAD |             | 0           | 0.013667426 | 0.002277904 | 0.018223235 | 0.004555809 |
| TGCT |             | 0           |             | 0           | 0           | 0           |
| THCA |             | 0           |             | 0           | 0           | 0           |
| THYM |             | 0           |             | 0           | 0           | 0           |
| UCEC | 0.008948546 | 0.031319911 | 0.040268456 | 0.033557047 | 0.022371365 | 0.026845638 |
| UCS  |             | 0           | 0           | 0.01754386  |             | 0           |
| UVM  |             | 0           |             | 0           | 0           | 0           |
| LAML |             | 0           |             | 0           | 0           | 0           |

## Sheet2: CNV (Copy Number Variations) of PSPGs in TCGA

| CNV Amplification Frequency | ACC         |
|-----------------------------|-------------|
| CDA                         | 0.055555556 |
| UCK1                        | 0.388888889 |
| UCK2                        | 0.155555556 |
| UCKL1                       | 0.577777778 |
| UPP1                        | 0.533333333 |
| UPP2                        | 0.155555556 |

  

| CNV Loss Frequency | ACC         |
|--------------------|-------------|
| CDA                | 0.366666667 |
| UCK1               | 0.055555556 |
| UCK2               | 0.144444444 |
| UCKL1              | 0.055555556 |
| UPP1               | 0.066666667 |
| UPP2               | 0.177777778 |

  

| CNV Frequency (CNV Amplification Frequency-CN Loss Frequency) | ACC          |
|---------------------------------------------------------------|--------------|
| CDA                                                           | -0.311111111 |
| UCK1                                                          | 0.333333333  |
| UCK2                                                          | 0.011111111  |
| UCKL1                                                         | 0.522222222  |
| UPP1                                                          | 0.466666667  |
| UPP2                                                          | -0.022222222 |

  

| CNV on Gene Expression | ACC Correlation |
|------------------------|-----------------|
| CDA                    | 0.015438303     |
| UCK1                   | 0.443042573     |
| UCK2                   | 0.292067936     |
| UCKL1                  | 0.292567984     |
| UPP1                   | 0.318369833     |
| UPP2                   | -0.161507221    |

| BLCA        | BRCA        | CESC        |
|-------------|-------------|-------------|
| 0.196078431 | 0.063888889 | 0.277966102 |
| 0.151960784 | 0.137962963 | 0.203389831 |
| 0.485294118 | 0.735185185 | 0.53559322  |
| 0.558823529 | 0.484259259 | 0.420338983 |
| 0.433823529 | 0.313888889 | 0.145762712 |
| 0.12745098  | 0.082407407 | 0.125423729 |

| BLCA        | BRCA        | CESC        |
|-------------|-------------|-------------|
| 0.191176471 | 0.412037037 | 0.118644068 |
| 0.401960784 | 0.266666667 | 0.169491525 |
| 0.051470588 | 0.021296296 | 0.027118644 |
| 0.056372549 | 0.044444444 | 0.047457627 |
| 0.051470588 | 0.088888889 | 0.081355932 |
| 0.272058824 | 0.225925926 | 0.152542373 |

| BLCA         | BRCA         | CESC         |
|--------------|--------------|--------------|
| 0.004901961  | -0.348148148 | 0.159322034  |
| -0.25        | -0.128703704 | 0.033898305  |
| 0.433823529  | 0.713888889  | 0.508474576  |
| 0.50245098   | 0.439814815  | 0.372881356  |
| 0.382352941  | 0.225        | 0.06440678   |
| -0.144607843 | -0.143518519 | -0.027118644 |

| ACC p-value | BLCA Correlation | BLCA p-value |
|-------------|------------------|--------------|
| 0.893985651 | -0.084361029     | 0.09037905   |
| 5.46E-05    | 0.505293335      | 1.44E-27     |
| 0.009953856 | 0.54960685       | 2.91E-33     |
| 0.009821692 | 0.378870062      | 3.08E-15     |
| 0.004775317 | 0.199192948      | 5.54E-05     |
| 0.160536044 | 0.032388842      | 0.516234404  |

| CHOL        | COAD        | DLBC        |
|-------------|-------------|-------------|
| 0           | 0.015521064 | 0           |
| 0.027777778 | 0.150776053 | 0.145833333 |
| 0.638888889 | 0.208425721 | 0.3125      |
| 0.361111111 | 0.720620843 | 0.083333333 |
| 0.194444444 | 0.549889135 | 0.291666667 |
| 0.166666667 | 0.179600887 | 0.083333333 |

| CHOL        | COAD        | DLBC        |
|-------------|-------------|-------------|
| 0.805555556 | 0.354767184 | 0.125       |
| 0.5         | 0.128603104 | 0.020833333 |
| 0           | 0.099778271 | 0.041666667 |
| 0.027777778 | 0           | 0.041666667 |
| 0.083333333 | 0.002217295 | 0.083333333 |
| 0.083333333 | 0.033259424 | 0.166666667 |

| CHOL         | COAD        | DLBC         |
|--------------|-------------|--------------|
| -0.805555556 | -0.33924612 | -0.125       |
| -0.472222222 | 0.022172949 | 0.125        |
| 0.638888889  | 0.10864745  | 0.270833333  |
| 0.333333333  | 0.720620843 | 0.041666667  |
| 0.111111111  | 0.54767184  | 0.208333333  |
| 0.083333333  | 0.146341463 | -0.083333333 |

| BRCA Correlation | BRCA p-value | CESC Correlation |
|------------------|--------------|------------------|
| 0.098513234      | 0.001201162  | 0.024986739      |
| 0.439466843      | 3.99E-52     | 0.381592381      |
| 0.415762672      | 2.65E-46     | 0.370274935      |
| 0.395993954      | 8.58E-42     | 0.568055461      |
| 0.084850979      | 0.00530835   | 0.356636463      |
| 0.079072522      | 0.009397718  | 0.113810878      |

| ESCA        | GBM         | HNSC        |
|-------------|-------------|-------------|
| 0.119565217 | 0.140381282 | 0.105363985 |
| 0.288043478 | 0.159445407 | 0.342911877 |
| 0.483695652 | 0.168110919 | 0.256704981 |
| 0.635869565 | 0.389948007 | 0.38697318  |
| 0.657608696 | 0.779896014 | 0.373563218 |
| 0.282608696 | 0.058925477 | 0.157088123 |

| ESCA        | GBM         | HNSC        |
|-------------|-------------|-------------|
| 0.364130435 | 0.093587522 | 0.172413793 |
| 0.304347826 | 0.128249567 | 0.126436782 |
| 0.059782609 | 0.020797227 | 0.074712644 |
| 0.032608696 | 0.034662045 | 0.063218391 |
| 0.054347826 | 0.019064125 | 0.044061303 |
| 0.135869565 | 0.060658579 | 0.109195402 |

| ESCA         | GBM          | HNSC         |
|--------------|--------------|--------------|
| -0.244565217 | 0.046793761  | -0.067049808 |
| -0.016304348 | 0.031195841  | 0.216475096  |
| 0.423913043  | 0.147313692  | 0.181992337  |
| 0.60326087   | 0.355285962  | 0.323754789  |
| 0.60326087   | 0.760831889  | 0.329501916  |
| 0.14673913   | -0.001733102 | 0.04789272   |

| CESC p-value | CHOL Correlation | CHOL p-value |
|--------------|------------------|--------------|
| 0.670684634  | 0.413203053      | 0.012252584  |
| 1.48E-11     | 0.592766775      | 0.000139311  |
| 6.41E-11     | 0.223377292      | 0.190336886  |
| 2.38E-26     | 0.372146926      | 0.02541464   |
| 3.48E-10     | 0.229863265      | 0.177450696  |
| 0.0520432    | -0.204242121     | 0.232145764  |

| KICH        | KIRC        | KIRP        |
|-------------|-------------|-------------|
| 0.015151515 | 0.015151515 | 0           |
| 0.136363636 | 0.024621212 | 0.013888889 |
| 0.015151515 | 0.117424242 | 0.059027778 |
| 0.348484848 | 0.227272727 | 0.354166667 |
| 0.363636364 | 0.327651515 | 0.600694444 |
| 0.045454545 | 0.149621212 | 0.173611111 |

| KICH        | KIRC        | KIRP        |
|-------------|-------------|-------------|
| 0.803030303 | 0.185606061 | 0.180555556 |
| 0.166666667 | 0.295454545 | 0.118055556 |
| 0.772727273 | 0.0625      | 0.069444444 |
| 0.045454545 | 0.001893939 | 0           |
| 0.015151515 | 0.003787879 | 0.003472222 |
| 0.696969697 | 0.026515152 | 0.017361111 |

| KICH         | KIRC         | KIRP         |
|--------------|--------------|--------------|
| -0.787878788 | -0.170454545 | -0.180555556 |
| -0.03030303  | -0.270833333 | -0.104166667 |
| -0.757575758 | 0.054924242  | -0.010416667 |
| 0.303030303  | 0.225378788  | 0.354166667  |
| 0.348484848  | 0.323863636  | 0.597222222  |
| -0.651515152 | 0.123106061  | 0.15625      |

| COAD Correlation | COAD p-value | DLBC Correlation |
|------------------|--------------|------------------|
| 0.145390609      | 0.002156491  | 0.081851695      |
| 0.460024757      | 1.39E-24     | -0.008853944     |
| 0.332177685      | 7.15E-13     | 0.267009861      |
| 0.544129858      | 1.66E-35     | 0.150076742      |
| 0.130927639      | 0.005783475  | -0.288938917     |
| 0.101688707      | 0.032370761  | 0.230385874      |

| LAML        | LGG         | LHC         |
|-------------|-------------|-------------|
| 0.02617801  | 0.027290448 | 0.056756757 |
| 0.015706806 | 0.074074074 | 0.081081081 |
| 0.015706806 | 0.066276803 | 0.745945946 |
| 0.010471204 | 0.097465887 | 0.340540541 |
| 0.010471204 | 0.228070175 | 0.305405405 |
| 0.005235602 | 0.023391813 | 0.148648649 |

| LAML        | LGG         | LHC         |
|-------------|-------------|-------------|
| 0.005235602 | 0.380116959 | 0.381081081 |
| 0.010471204 | 0.095516569 | 0.294594595 |
| 0           | 0.023391813 | 0.010810811 |
| 0.010471204 | 0.023391813 | 0.021621622 |
| 0.089005236 | 0.007797271 | 0.043243243 |
| 0           | 0.044834308 | 0.127027027 |

| LAML         | LGG          | LHC          |
|--------------|--------------|--------------|
| 0.020942408  | -0.352826511 | -0.324324324 |
| 0.005235602  | -0.021442495 | -0.213513514 |
| 0.015706806  | 0.04288499   | 0.735135135  |
| 0            | 0.074074074  | 0.318918919  |
| -0.078534031 | 0.220272904  | 0.262162162  |
| 0.005235602  | -0.021442495 | 0.021621622  |

| DLBC p-value | ESCA Correlation | ESCA p-value |
|--------------|------------------|--------------|
| 0.580217951  | 0.203769898      | 0.005661829  |
| 0.952373787  | 0.500496316      | 5.41E-13     |
| 0.066564733  | 0.407070072      | 1.07E-08     |
| 0.308613771  | 0.468386239      | 2.29E-11     |
| 0.046396593  | 0.21067886       | 0.004200698  |
| 0.115173225  | -0.023360028     | 0.753607547  |



| LUAD        | LUSC        | MESO        |
|-------------|-------------|-------------|
| 0.226744186 | 0.099800399 | 0.034482759 |
| 0.104651163 | 0.213572854 | 0.045977011 |
| 0.71124031  | 0.518962076 | 0.275862069 |
| 0.486434109 | 0.493013972 | 0.149425287 |
| 0.519379845 | 0.471057884 | 0.275862069 |
| 0.290697674 | 0.303393214 | 0.08045977  |

| LUAD        | LUSC        | MESO        |
|-------------|-------------|-------------|
| 0.240310078 | 0.45508982  | 0.333333333 |
| 0.437984496 | 0.45508982  | 0.24137931  |
| 0.019379845 | 0.047904192 | 0.034482759 |
| 0.079457364 | 0.125748503 | 0.034482759 |
| 0.067829457 | 0.141716567 | 0.011494253 |
| 0.058139535 | 0.105788423 | 0.045977011 |

| LUAD         | LUSC         | MESO         |
|--------------|--------------|--------------|
| -0.013565891 | -0.355289421 | -0.298850575 |
| -0.333333333 | -0.241516966 | -0.195402299 |
| 0.691860465  | 0.471057884  | 0.24137931   |
| 0.406976744  | 0.367265469  | 0.114942529  |
| 0.451550388  | 0.329341317  | 0.264367816  |
| 0.23255814   | 0.19760479   | 0.034482759  |

| GBM Correlation | GBM p-value | HNSC Correlation |
|-----------------|-------------|------------------|
| -0.037016376    | 0.655121642 | 0.126656795      |
| 0.464468252     | 2.74E-09    | 0.487445386      |
| 0.368706624     | 4.01E-06    | 0.438601625      |
| 0.393403261     | 7.56E-07    | 0.35344121       |
| 0.299560223     | 0.000216693 | 0.263185508      |
| -0.004696259    | 0.954825323 | 0.055605985      |

|              |                  |              |
|--------------|------------------|--------------|
| OV           | PAAD             | PCPG         |
| 0.246977547  | 0.038043478      | 0.00617284   |
| 0.124352332  | 0.065217391      | 0.018518519  |
| 0.557858377  | 0.315217391      | 0.154320988  |
| 0.692573402  | 0.260869565      | 0.061728395  |
| 0.312607945  | 0.298913043      | 0.172839506  |
| 0.379965458  | 0.119565217      | 0.018518519  |
| OV           | PAAD             | PCPG         |
| 0.430051813  | 0.326086957      | 0.62962963   |
| 0.590673575  | 0.244565217      | 0.067901235  |
| 0.039723661  | 0.038043478      | 0.086419753  |
| 0.04835924   | 0.032608696      | 0.024691358  |
| 0.195164076  | 0.02173913       | 0            |
| 0.117443869  | 0.038043478      | 0.080246914  |
| OV           | PAAD             | PCPG         |
| -0.183074266 | -0.288043478     | -0.62345679  |
| -0.466321244 | -0.179347826     | -0.049382716 |
| 0.518134715  | 0.277173913      | 0.067901235  |
| 0.644214162  | 0.22826087       | 0.037037037  |
| 0.117443869  | 0.277173913      | 0.172839506  |
| 0.262521589  | 0.081521739      | -0.061728395 |
| HNSC p-value | KICH Correlation | KICH p-value |
| 0.004026119  | -0.155729042     | 0.211807783  |
| 4.95E-32     | 0.525766739      | 5.81E-06     |
| 1.41E-25     | 0.250903144      | 0.042150534  |
| 1.44E-16     | 0.445205723      | 0.000179916  |
| 1.37E-09     | -0.038573214     | 0.758464894  |
| 0.208182246  | 0.051413648      | 0.681822671  |

| PRAD        | READ        | SARC        |
|-------------|-------------|-------------|
| 0.012195122 | 0.018181818 | 0.303501946 |
| 0.113821138 | 0.218181818 | 0.272373541 |
| 0.056910569 | 0.278787879 | 0.346303502 |
| 0.083333333 | 0.884848485 | 0.357976654 |
| 0.201219512 | 0.636363636 | 0.295719844 |
| 0.018292683 | 0.260606061 | 0.128404669 |

| PRAD        | READ        | SARC        |
|-------------|-------------|-------------|
| 0.091463415 | 0.448484848 | 0.163424125 |
| 0.028455285 | 0.193939394 | 0.214007782 |
| 0.046747967 | 0.090909091 | 0.101167315 |
| 0.014227642 | 0.006060606 | 0.140077821 |
| 0.012195122 | 0.006060606 | 0.13618677  |
| 0.115853659 | 0.054545455 | 0.280155642 |

| PRAD         | READ        | SARC         |
|--------------|-------------|--------------|
| -0.079268293 | -0.43030303 | 0.140077821  |
| 0.085365854  | 0.024242424 | 0.058365759  |
| 0.010162602  | 0.187878788 | 0.245136187  |
| 0.069105691  | 0.878787879 | 0.217898833  |
| 0.18902439   | 0.63030303  | 0.159533074  |
| -0.097560976 | 0.206060606 | -0.151750973 |

| KIRC Correlation | KIRC p-value | KIRP Correlation |
|------------------|--------------|------------------|
| 0.043524194      | 0.319561576  | -0.048445073     |
| 0.466254532      | 1.08E-29     | 0.347377175      |
| 0.210316969      | 1.16E-06     | 0.294388316      |
| 0.153739666      | 0.000407373  | 0.516315043      |
| 0.147872944      | 0.000676768  | 0.151359653      |
| 0.122917777      | 0.004796543  | 0.169191113      |

| STAD        | TGCT        | THCA        |
|-------------|-------------|-------------|
| 0.092970522 | 0.16        | 0.006012024 |
| 0.256235828 | 0.113333333 | 0.01002004  |
| 0.349206349 | 0.453333333 | 0.054108216 |
| 0.64399093  | 0.28        | 0.024048096 |
| 0.492063492 | 0.813333333 | 0.036072144 |
| 0.163265306 | 0.293333333 | 0.002004008 |

| STAD        | TGCT        | THCA        |
|-------------|-------------|-------------|
| 0.253968254 | 0.193333333 | 0.008016032 |
| 0.197278912 | 0.406666667 | 0.056112224 |
| 0.031746032 | 0.006666667 | 0.006012024 |
| 0.013605442 | 0.1         | 0           |
| 0.015873016 | 0.02        | 0           |
| 0.10430839  | 0.046666667 | 0.02004008  |

| STAD         | TGCT         | THCA         |
|--------------|--------------|--------------|
| -0.160997732 | -0.033333333 | -0.002004008 |
| 0.058956916  | -0.293333333 | -0.046092184 |
| 0.317460317  | 0.446666667  | 0.048096192  |
| 0.630385488  | 0.18         | 0.024048096  |
| 0.476190476  | 0.793333333  | 0.036072144  |
| 0.058956916  | 0.246666667  | -0.018036072 |

| KIRP p-value | LAML Correlation | LAML p-value |
|--------------|------------------|--------------|
| 0.412760333  | -0.015577883     | 0.842104373  |
| 1.37E-09     | 0.171304767      | 0.027330237  |
| 3.63E-07     | -0.12848597      | 0.09899156   |
| 5.03E-21     | 0.196688433      | 0.011089545  |
| 0.010101823  | 0.205597357      | 0.007875272  |
| 0.003982185  | NA               | NA           |

| THYM        | UCEC        | UCS         |
|-------------|-------------|-------------|
| 0.008130081 | 0.070500928 | 0.25        |
| 0.097560976 | 0.038961039 | 0.089285714 |
| 0.195121951 | 0.447124304 | 0.696428571 |
| 0.081300813 | 0.276437848 | 0.821428571 |
| 0.113821138 | 0.146567718 | 0.428571429 |
| 0           | 0.170686456 | 0.375       |

| THYM        | UCEC        | UCS         |
|-------------|-------------|-------------|
| 0.06504065  | 0.146567718 | 0.303571429 |
| 0.024390244 | 0.231910946 | 0.696428571 |
| 0           | 0.012987013 | 0.071428571 |
| 0.008130081 | 0.022263451 | 0.053571429 |
| 0.024390244 | 0.079777365 | 0.178571429 |
| 0.024390244 | 0.033395176 | 0.071428571 |

| THYM         | UCEC         | UCS          |
|--------------|--------------|--------------|
| -0.056910569 | -0.07606679  | -0.053571429 |
| 0.073170732  | -0.192949907 | -0.607142857 |
| 0.195121951  | 0.434137291  | 0.625        |
| 0.073170732  | 0.254174397  | 0.767857143  |
| 0.089430894  | 0.066790353  | 0.25         |
| -0.024390244 | 0.13729128   | 0.303571429  |

| LGG Correlation | LGG p-value | LIHC Correlation |
|-----------------|-------------|------------------|
| -0.03710566     | 0.401658173 | 0.264813365      |
| 0.357131698     | 7.07E-17    | 0.477380348      |
| 0.160735511     | 0.000256687 | 0.373236933      |
| 0.217684296     | 6.42E-07    | 0.531179153      |
| 0.355862451     | 9.24E-17    | 0.143140143      |
| 0.036632615     | 0.407690611 | -0.080378791     |

UVM  
0  
0.05  
0.1  
0.1125  
0.1125  
0.1

UVM  
0.3125  
0.075  
0  
0  
0  
0

UVM  
-0.3125  
-0.025  
0.1  
0.1125  
0.1125  
0.1

| LIHC p-value | LUAD Correlation | LUAD p-value |
|--------------|------------------|--------------|
| 2.95E-07     | 0.049038767      | 0.268045402  |
| 4.07E-22     | 0.494341407      | 6.60E-33     |
| 1.78E-13     | 0.105125572      | 0.017336012  |
| 6.86E-28     | 0.495469041      | 4.52E-33     |
| 0.006225769  | 0.381559581      | 3.44E-19     |
| 0.125835477  | -0.031302615     | 0.479728471  |

| LUSC Correlation | LUSC p-value | MESO Correlation |
|------------------|--------------|------------------|
| 0.018072832      | 0.68744036   | 0.148112831      |
| 0.633045337      | 3.97E-57     | 0.544156022      |
| 0.515347572      | 3.92E-35     | 0.251176882      |
| 0.456292652      | 5.59E-27     | 0.209495488      |
| 0.27901439       | 2.34E-10     | -0.110098827     |
| 0.005664602      | 0.899657422  | -0.057448214     |

| MESO p-value | OV Correlation | OV p-value  |
|--------------|----------------|-------------|
| 0.17097203   | 0.007067622    | 0.902811909 |
| 5.11E-08     | 0.658424345    | 8.79E-39    |
| 0.018940962  | 0.337726497    | 1.83E-09    |
| 0.051480839  | 0.571450017    | 1.72E-27    |
| 0.310024601  | 0.088391309    | 0.125980187 |
| 0.597133035  | 0.170080538    | 0.003075332 |



| PAAD Correlation | PAAD p-value | PCPG Correlation |
|------------------|--------------|------------------|
| 0.02292641       | 0.761970062  | 0.174694307      |
| 0.312565334      | 2.28E-05     | 0.229007551      |
| 0.536474002      | 1.40E-14     | 0.353368666      |
| 0.361597106      | 7.61E-07     | 0.3282793        |
| 0.171155867      | 0.022739602  | 0.049312788      |
| -0.011827601     | 0.87583868   | 0.186531007      |

| PCPG p-value | PRAD Correlation | PRAD p-value |
|--------------|------------------|--------------|
| 0.026188597  | 0.087707399      | 0.052106006  |
| 0.003375717  | 0.348309726      | 1.89E-15     |
| 3.98E-06     | 0.320556161      | 3.39E-13     |
| 2.00E-05     | 0.137213196      | 0.002310484  |
| 0.533173892  | 0.080734315      | 0.073887122  |
| 0.017469917  | 0.033967732      | 0.452668931  |

| READ Correlation | READ p-value | SARC Correlation |
|------------------|--------------|------------------|
| 0.230545464      | 0.003565279  | 0.023243012      |
| 0.526879588      | 1.15E-12     | 0.467715292      |
| 0.432114607      | 1.43E-08     | 0.355876386      |
| 0.417279278      | 4.91E-08     | 0.382007659      |
| 0.039445103      | 0.622668533  | 0.246459012      |
| 0.068921368      | 0.389528357  | 0.097522552      |

| SARC p-value | STAD Correlation | STAD p-value |
|--------------|------------------|--------------|
| 0.711838903  | -0.045737688     | 0.353839434  |
| 2.89E-15     | 0.386807939      | 3.44E-16     |
| 4.99E-09     | 0.427065289      | 9.74E-20     |
| 2.77E-10     | 0.532639362      | 1.22E-31     |
| 6.95E-05     | 0.225727068      | 3.60E-06     |
| 0.120336195  | 0.034432516      | 0.485278809  |

| TGCT Correlation | TGCT p-value | THCA Correlation |
|------------------|--------------|------------------|
| 0.401656633      | 3.50E-07     | -0.020914822     |
| 0.526168477      | 4.68E-12     | 0.19045516       |
| 0.265137728      | 0.001041817  | 0.152918309      |
| 0.196888291      | 0.015739799  | 0.149757048      |
| 0.286862321      | 0.000372212  | -0.132526812     |
| 0.012494122      | 0.879386533  | 0.143857153      |

| THCA p-value | THYM Correlation | THYM p-value |
|--------------|------------------|--------------|
| 0.641830248  | -0.056437664     | 0.542093728  |
| 1.92E-05     | 0.409536987      | 3.75E-06     |
| 0.000624744  | 0.432905004      | 8.78E-07     |
| 0.000810725  | 0.366142084      | 4.22E-05     |
| 0.003075258  | 0.008676872      | 0.925382296  |
| 0.001301063  | -0.005431732     | 0.953248257  |

| UCEC Correlation | UCEC p-value | UCS Correlation |
|------------------|--------------|-----------------|
| 0.047366406      | 0.279126006  | -0.01126898     |
| 0.403499837      | 6.16E-22     | 0.356553107     |
| 0.466933169      | 9.86E-30     | 0.445315464     |
| 0.437006167      | 7.54E-26     | 0.344281052     |
| 0.123418872      | 0.004665516  | 0.325419461     |
| 0.030072043      | 0.49215082   | 0.247630607     |

| UCS p-value | UVM Correlation | UVM p-value |
|-------------|-----------------|-------------|
| 0.934304857 | 0.056058603     | 0.621376297 |
| 0.006990465 | 0.365942843     | 0.000843328 |
| 0.000583606 | 0.354592178     | 0.001250071 |
| 0.009371015 | 0.448024381     | 3.08E-05    |
| 0.014392769 | -0.026556094    | 0.815118625 |
| 0.065757008 | -0.189849559    | 0.091657482 |



### Sheet3: DNA methylation features of PSPGs in TCGA

| Cancer | Gene | Mean difference (Tumor vs. Normal) |
|--------|------|------------------------------------|
| BLCA   | CDA  | -0.113288801                       |
| BRCA   | CDA  | 0.004418384                        |
| CESC   | CDA  | -0.061762716                       |
| CHOL   | CDA  | 0.069736389                        |
| COAD   | CDA  | -0.051831235                       |
| ESCA   | CDA  | -0.019651109                       |
| GBM    | CDA  | -0.1316654                         |
| HNSC   | CDA  | -0.055432657                       |
| KIRC   | CDA  | -0.086001607                       |
| KIRP   | CDA  | -0.040258817                       |
| LIHC   | CDA  | -0.051274528                       |
| LUAD   | CDA  | -0.006285175                       |
| LUSC   | CDA  | -0.017604302                       |
| PAAD   | CDA  | -0.053366563                       |
| PCPG   | CDA  | -0.042996079                       |
| PRAD   | CDA  | -0.044160657                       |
| READ   | CDA  | -0.076743483                       |
| SARC   | CDA  | -0.085830939                       |
| SKCM   | CDA  | -0.075398969                       |
| STAD   | CDA  | -0.044534905                       |
| THCA   | CDA  | 0.002867328                        |
| THYM   | CDA  | -0.002909435                       |
| UCEC   | CDA  | -0.0684049                         |
| BLCA   | UCK1 | 0.002501104                        |
| BRCA   | UCK1 | 0.043796223                        |
| CESC   | UCK1 | 0.025807765                        |
| CHOL   | UCK1 | 0.025578765                        |
| COAD   | UCK1 | 0.038465977                        |
| ESCA   | UCK1 | 0.021383312                        |
| GBM    | UCK1 | 0.042412289                        |
| HNSC   | UCK1 | 0.022154153                        |
| KIRC   | UCK1 | 0.012022005                        |
| KIRP   | UCK1 | 0.01880156                         |
| LIHC   | UCK1 | -0.018628838                       |
| LUAD   | UCK1 | -0.002213821                       |
| LUSC   | UCK1 | -0.017187308                       |
| PAAD   | UCK1 | -0.006871101                       |
| PCPG   | UCK1 | -0.02644997                        |
| PRAD   | UCK1 | 0.028911184                        |
| READ   | UCK1 | 0.025450835                        |
| SARC   | UCK1 | 0.021839304                        |
| SKCM   | UCK1 | 0.002740282                        |
| STAD   | UCK1 | -0.017377809                       |
| THCA   | UCK1 | 0.002663905                        |
| THYM   | UCK1 | -0.024048763                       |
| UCEC   | UCK1 | 0.041434237                        |
| BLCA   | UCK2 | -0.005477015                       |
| BRCA   | UCK2 | 0.01701438                         |
| CESC   | UCK2 | 0.007808077                        |
| CHOL   | UCK2 | 0.006333981                        |
| COAD   | UCK2 | -0.004542035                       |
| ESCA   | UCK2 | 0.010877869                        |

|      |       |              |
|------|-------|--------------|
| GBM  | UCK2  | -0.040691488 |
| HNSC | UCK2  | 0.014171674  |
| KIRC | UCK2  | -0.030456061 |
| KIRP | UCK2  | -0.002229902 |
| LIHC | UCK2  | -0.018151132 |
| LUAD | UCK2  | 0.001423005  |
| LUSC | UCK2  | -0.007858531 |
| PAAD | UCK2  | -0.009869817 |
| PCPG | UCK2  | -0.006571784 |
| PRAD | UCK2  | -0.009416833 |
| READ | UCK2  | -0.017322583 |
| SARC | UCK2  | 0.00192278   |
| SKCM | UCK2  | 0.028306815  |
| STAD | UCK2  | -0.014007292 |
| THCA | UCK2  | 0.004939578  |
| THYM | UCK2  | 0.005721156  |
| UCEC | UCK2  | 0.01972769   |
| BLCA | UCKL1 | 0.015799179  |
| BRCA | UCKL1 | 0.067171587  |
| CESC | UCKL1 | 0.00921939   |
| CHOL | UCKL1 | -3.38E-05    |
| COAD | UCKL1 | -0.008474633 |
| ESCA | UCKL1 | 0.012428049  |
| GBM  | UCKL1 | -0.014816371 |
| HNSC | UCKL1 | 0.022794183  |
| KIRC | UCKL1 | -0.005487274 |
| KIRP | UCKL1 | 0.029494938  |
| LIHC | UCKL1 | -0.004326916 |
| LUAD | UCKL1 | 0.018069323  |
| LUSC | UCKL1 | -0.010533856 |
| PAAD | UCKL1 | -0.008055407 |
| PCPG | UCKL1 | -0.035278427 |
| PRAD | UCKL1 | 0.008836768  |
| READ | UCKL1 | -0.012896272 |
| SARC | UCKL1 | 0.036594624  |
| SKCM | UCKL1 | 0.033842583  |
| STAD | UCKL1 | 0.009121718  |
| THCA | UCKL1 | 0.011780644  |
| THYM | UCKL1 | -0.019418863 |
| UCEC | UCKL1 | 0.02517301   |
| BLCA | UPP1  | -0.114478426 |
| BRCA | UPP1  | -0.022367513 |
| CESC | UPP1  | -0.109841058 |
| CHOL | UPP1  | -0.048054891 |
| COAD | UPP1  | -0.021872489 |
| ESCA | UPP1  | -0.034046503 |
| GBM  | UPP1  | -0.009880112 |
| HNSC | UPP1  | -0.058480224 |
| KIRC | UPP1  | -0.000565149 |
| KIRP | UPP1  | -0.020916443 |
| LIHC | UPP1  | 0.009124096  |
| LUAD | UPP1  | -0.045064815 |
| LUSC | UPP1  | -0.01153826  |
| PAAD | UPP1  | -0.011387267 |

|      |      |              |
|------|------|--------------|
| PCPG | UPP1 | 0.036413027  |
| PRAD | UPP1 | 0.034211167  |
| READ | UPP1 | -0.015451902 |
| SARC | UPP1 | 0.001460571  |
| SKCM | UPP1 | -0.082014336 |
| STAD | UPP1 | -0.03828202  |
| THCA | UPP1 | -0.026352557 |
| THYM | UPP1 | 0.014691655  |
| UCEC | UPP1 | -0.127472029 |
| BLCA | UPP2 | -0.036803224 |
| BRCA | UPP2 | -0.000588401 |
| CESC | UPP2 | 0.002873602  |
| CHOL | UPP2 | 0.03745796   |
| COAD | UPP2 | -0.027036479 |
| ESCA | UPP2 | -0.017480605 |
| GBM  | UPP2 | -0.089001716 |
| HNSC | UPP2 | -0.03515321  |
| KIRC | UPP2 | -0.016211352 |
| KIRP | UPP2 | 0.001504377  |
| LIHC | UPP2 | -0.018584559 |
| LUAD | UPP2 | -0.019896872 |
| LUSC | UPP2 | -0.049333694 |
| PAAD | UPP2 | -0.017923586 |
| PCPG | UPP2 | 0.002602941  |
| PRAD | UPP2 | 0.000618332  |
| READ | UPP2 | -0.04089468  |
| SARC | UPP2 | -0.001418289 |
| SKCM | UPP2 | 0.012088086  |
| STAD | UPP2 | 0.009838914  |
| THCA | UPP2 | -0.003837783 |
| THYM | UPP2 | 0.007336316  |
| UCEC | UPP2 | -0.035202038 |

| Mean Difference (Log Transformed) | p-value     |
|-----------------------------------|-------------|
| -0.374857444                      | 5.14E-09    |
| 0.011263456                       | 0.738103422 |
| -0.185803584                      | 0.158626081 |
| 0.173638283                       | 0.005218951 |
| -0.186795938                      | 2.30E-07    |
| -0.067330352                      | 0.310534973 |
| -0.328655536                      | 0.121488441 |
| -0.171840652                      | 1.22E-08    |
| -0.212937399                      | 1.30E-43    |
| -0.096085713                      | 4.80E-05    |
| -0.146116885                      | 1.67E-07    |
| -0.018758115                      | 0.919099647 |
| -0.055676726                      | 0.218706303 |
| -0.162905814                      | 0.002155231 |
| -0.115715893                      | 0.34691196  |
| -0.148699143                      | 1.02E-05    |
| -0.281335317                      | 0.002068844 |
| -0.251273117                      | 0.166440852 |
| -0.215716938                      | 0.312866306 |
| -0.153327994                      | 0.262393916 |
| 0.006735921                       | 0.701238974 |
| -0.006564054                      | 0.945533019 |
| -0.18180443                       | 1.70E-05    |
| 0.011850505                       | 0.988616478 |
| 0.216753576                       | 1.03E-26    |
| 0.128887368                       | 0.364686884 |
| 0.111876715                       | 0.11649151  |
| 0.167615311                       | 4.38E-07    |
| 0.101730089                       | 0.038656067 |
| 0.216516917                       | 0.194906581 |
| 0.105367271                       | 3.87E-05    |
| 0.05525768                        | 6.77E-07    |
| 0.083749449                       | 0.000163538 |
| -0.088503235                      | 4.70E-08    |
| -0.00937805                       | 0.424574154 |
| -0.079731176                      | 1.50E-05    |
| -0.032229913                      | 0.123265702 |
| -0.139032739                      | 0.138561907 |
| 0.137837641                       | 6.46E-12    |
| 0.113249381                       | 0.042721172 |
| 0.110981747                       | 0.376619763 |
| 0.013280563                       | 0.891188546 |
| -0.073348191                      | 0.312981345 |
| 0.01229915                        | 0.746965789 |
| -0.099331936                      | 0.564738473 |
| 0.199295824                       | 3.50E-08    |
| -0.024220074                      | 0.491193176 |
| 0.074691236                       | 5.92E-16    |
| 0.03441241                        | 0.318869059 |
| 0.030238854                       | 0.425252653 |
| -0.023792685                      | 0.152152265 |
| 0.052337741                       | 0.141283995 |

|              |             |
|--------------|-------------|
| -0.173137357 | 0.096444375 |
| 0.063456498  | 1.91E-09    |
| -0.141396293 | 5.32E-37    |
| -0.010081174 | 0.520630395 |
| -0.086452994 | 1.73E-06    |
| 0.006030126  | 0.793457464 |
| -0.034536426 | 0.045571048 |
| -0.046995009 | 0.159814467 |
| -0.028700103 | 0.649770823 |
| -0.042619273 | 2.64E-07    |
| -0.090726425 | 0.006894428 |
| 0.00875843   | 0.660802036 |
| 0.121082179  | 0.254000283 |
| -0.067787498 | 0.511061938 |
| 0.02001843   | 0.002084536 |
| 0.025298716  | 0.660529001 |
| 0.085158611  | 2.67E-08    |
| 0.0380954    | 0.021920924 |
| 0.168782767  | 1.94E-35    |
| 0.023255357  | 0.739689181 |
| -7.43E-05    | 0.603795699 |
| -0.019735666 | 0.411637566 |
| 0.031702508  | 0.13754014  |
| -0.03525607  | 0.558540911 |
| 0.060552039  | 7.08E-06    |
| -0.012773998 | 0.13590685  |
| 0.066153162  | 6.38E-11    |
| -0.009614995 | 0.366569472 |
| 0.044003934  | 5.71E-05    |
| -0.026945144 | 0.167632143 |
| -0.019218821 | 0.413176984 |
| -0.090138157 | 0.225940796 |
| 0.023029683  | 0.035670263 |
| -0.029905599 | 0.570442982 |
| 0.088531996  | 0.058610764 |
| 0.086550977  | 0.257163647 |
| 0.022644285  | 0.661571379 |
| 0.025800722  | 0.000190502 |
| -0.047807619 | 0.82239062  |
| 0.061982359  | 0.000222953 |
| -0.431767156 | 1.03E-12    |
| -0.069295638 | 0.046689478 |
| -0.378382208 | 0.0168313   |
| -0.174342023 | 0.014595744 |
| -0.073927526 | 0.361471981 |
| -0.136832689 | 0.013207245 |
| -0.035595657 | 0.474034423 |
| -0.210426173 | 3.67E-12    |
| -0.002209062 | 0.236227039 |
| -0.083631908 | 2.06E-05    |
| 0.030078499  | 0.000450881 |
| -0.16842189  | 9.61E-11    |
| -0.042923716 | 0.021356039 |
| -0.04304403  | 0.307384341 |

|              |             |
|--------------|-------------|
| 0.156517762  | 0.381178544 |
| 0.102852576  | 5.40E-07    |
| -0.052343357 | 0.735560915 |
| 0.00427164   | 0.596687339 |
| -0.283451096 | 0.197749819 |
| -0.138695689 | 0.275843162 |
| -0.096968791 | 2.16E-07    |
| 0.040674276  | 0.837609605 |
| -0.438775321 | 1.13E-18    |
| -0.110689682 | 5.78E-05    |
| -0.001794779 | 0.385826948 |
| 0.008918302  | 0.554966129 |
| 0.114508086  | 0.001956488 |
| -0.078653484 | 6.49E-11    |
| -0.054932529 | 0.082424209 |
| -0.274416083 | 0.091755914 |
| -0.111060152 | 0.000479835 |
| -0.049036296 | 1.43E-14    |
| 0.004532581  | 0.376789399 |
| -0.05703524  | 3.79E-05    |
| -0.060048373 | 6.09E-07    |
| -0.151093404 | 1.16E-16    |
| -0.053653028 | 0.001880761 |
| 0.008114804  | 0.689139299 |
| 0.00182959   | 0.898963263 |
| -0.11919087  | 4.51E-05    |
| -0.004492083 | 0.769886974 |
| 0.036752102  | 0.468267738 |
| 0.030340469  | 0.500507004 |
| -0.010660153 | 0.035655906 |
| 0.020945991  | 0.551618332 |
| -0.108272856 | 6.33E-09    |

**Table S3: Gene expression features of PSPGs across cancer types**

Sheet1: Gene expression alterations of PSPGs in TCGA

Sheet2: Protein expression alterations of PSPGs

Sheet1: Gene expression alterations of PSPGs in TCGA

| Log2 Fold Change | CDA       | UCK1      | UCK2      | UCKL1     | UPP1      |
|------------------|-----------|-----------|-----------|-----------|-----------|
| BLCA             | 0.1311791 | 0.3206901 | 1.3935255 | 0.7573413 | 0.8212165 |
| COAD             | -1.589387 | -0.452947 | 0.1951225 | 0.8913469 | -0.895973 |
| HNSC             | -0.056942 | -0.027198 | 0.4557727 | -0.051561 | 0.7098007 |
| KICH             | 0.6910242 | 0.4433212 | -0.792721 | 0.5934606 | 2.8516727 |
| KIRC             | -0.223446 | 0.0495557 | 0.5969762 | 0.3612435 | 0.6274656 |
| KIRP             | -3.251791 | 0.0686228 | 0.3261552 | 0.4095776 | 0.9075711 |
| LIHC             | -2.247245 | 0.051303  | 1.1996388 | 0.5125606 | -0.01073  |
| LUAD             | 1.2479526 | -0.133484 | 1.4353645 | 0.5245002 | 0.3652977 |
| LUSC             | -0.268307 | -0.032362 | 2.6479271 | 0.5821127 | -0.0836   |
| PRAD             | -0.175079 | 0.0580522 | 0.7981261 | 0.3538632 | -0.254739 |
| READ             | -1.451938 | -0.307563 | 0.173125  | 1.3105    | -0.5335   |
| STAD             | -0.538134 | -0.434568 | 0.8986713 | 0.3438176 | 0.2535594 |
| THCA             | 1.9283323 | 0.0116956 | 0.0855815 | -0.043786 | 1.9452254 |
| UCEC             | -0.436352 | -0.050342 | 1.6097446 | 0.3353793 | 1.0579567 |
| ESCA             | 1.8802569 | -0.355094 | 1.2569664 | 0.5282658 | 1.5979545 |
| BRCA             | 0.2738217 | -0.077336 | 0.8307576 | 0.3634605 | 0.2347733 |

| p-value | CDA       | UCK1      | UCK2      | UCKL1     | UPP1      |
|---------|-----------|-----------|-----------|-----------|-----------|
| BLCA    | 0.8499132 | 0.0291523 | 1.68E-09  | 2.85E-07  | 0.0020767 |
| COAD    | 1.49E-11  | 1.58E-12  | 0.0116959 | 1.95E-17  | 1.40E-11  |
| HNSC    | 0.570711  | 0.6652971 | 4.38E-08  | 0.7486915 | 0.0087142 |
| KICH    | 0.0038018 | 1.86E-05  | 1.87E-08  | 8.86E-08  | 1.49E-11  |
| KIRC    | 0.0182699 | 0.521198  | 8.05E-19  | 4.20E-09  | 6.88E-11  |
| KIRP    | 6.89E-18  | 0.506487  | 0.1255953 | 4.64E-05  | 1.76E-08  |
| LIHC    | 3.03E-17  | 0.9639536 | 5.62E-21  | 4.54E-11  | 0.9201143 |
| LUAD    | 4.98E-05  | 0.0027794 | 1.28E-16  | 8.66E-14  | 0.0033392 |
| LUSC    | 0.0566686 | 0.4646083 | 2.84E-31  | 1.94E-16  | 0.643271  |
| PRAD    | 0.1721339 | 0.5469591 | 1.63E-17  | 1.76E-08  | 0.01009   |
| READ    | 0.0010202 | 0.0391037 | 0.3837604 | 2.81E-07  | 0.0547767 |
| STAD    | 0.4883262 | 9.86E-07  | 6.15E-11  | 0.0001575 | 0.0130295 |
| THCA    | 2.79E-27  | 0.5454767 | 0.1607849 | 0.2378352 | 7.88E-26  |
| UCEC    | 0.0111421 | 0.3118185 | 6.84E-20  | 0.0009149 | 9.41E-08  |
| ESCA    | 0.0052952 | 0.0152842 | 1.49E-06  | 0.0006966 | 0.0002029 |
| BRCA    | 0.198777  | 0.0236432 | 3.02E-26  | 4.33E-09  | 0.0364859 |



UPP2

-0.240922  
-0.03422  
-0.09026  
-5.527515  
-4.16471  
-3.976291  
-1.731824  
-0.026119  
-0.159412  
-0.292141  
-0.248563  
0.1547057  
0.5542947  
-0.500034  
0.1754694  
-0.520504

UPP2

0.0503219  
0.1430611  
0.1622723  
1.17E-12  
1.81E-27  
3.19E-13  
2.32E-05  
0.4275153  
0.00229  
0.000258  
0.0641294  
0.3116629  
2.80E-07  
0.0059829  
0.3267504  
1.07E-12

Sheet2: Protein expression alterations of PSPGs

| Gene  | Log2 Fold Change | p-value   | Cancer |
|-------|------------------|-----------|--------|
| UPP1  | 0.04589979       | 0.8002137 | ESCC   |
| CDA   | -0.168442943     | 0.0839995 | ESCC   |
| UCKL1 | 0.248270265      | 0.0060243 | ESCC   |
| UCK2  | 0.093495062      | 0.3567616 | ESCC   |
| UCK1  | 0.415125         | 0.4444444 | ESCC   |
| CDA   | 1.322981674      | 0.0014255 | LUAD   |
| UCK1  | 0.793947248      | 0.0588301 | LUAD   |
| UCK2  | 2.243950496      | 0.0296022 | LUAD   |
| UCKL1 | 0.922963543      | 0.0007443 | LUAD   |
| UPP1  | 3.16577876       | 1.99E-13  | LUAD   |
| CDA   | 0.022915362      | 0.9024372 | KIRC   |
| UCK1  | -0.177187681     | 9.90E-11  | KIRC   |
| UCK2  | 0.303427102      | 2.31E-13  | KIRC   |
| UPP1  | 0.267680243      | 2.50E-06  | KIRC   |
| CDA   | 0.124353034      | 0.6994267 | COAD   |
| UCK2  | 0.102434376      | 0.040097  | COAD   |
| UCKL1 | 0.153573411      | 0.1494382 | COAD   |
| UPP1  | 0.178724361      | 0.0036194 | COAD   |
| CDA   | 0.418342444      | 0.0001172 | HNSC   |
| UCK1  | -0.282256085     | 0.0063429 | HNSC   |
| UCK2  | 0.379259588      | 1.21E-11  | HNSC   |
| UCKL1 | -0.149730357     | 0.0001404 | HNSC   |
| UPP1  | 0.965102092      | 3.01E-13  | HNSC   |
| CDA   | 0.458526263      | 0.2623743 | LUSC   |
| UCK2  | 1.516638384      | 1.27E-24  | LUSC   |
| UCKL1 | -0.154048569     | 0.0773013 | LUSC   |
| UPP1  | -0.741540909     | 5.94E-06  | LUSC   |
| UCK1  | -0.400715941     | 0.0077114 | OV     |
| UPP1  | -0.2883495       | 0.0672478 | OV     |
| CDA   | -1.208798181     | 6.13E-08  | OV     |
| UCK2  | -0.756485313     | 4.48E-05  | OV     |
| UCKL1 | -0.535506837     | 0.1576103 | OV     |
| CDA   | 0.969643641      | 1.35E-18  | PDAC   |
| UCK1  | -0.33362873      | 6.79E-05  | PDAC   |
| UCK2  | -0.141194333     | 0.0069484 | PDAC   |
| UCKL1 | -0.79758288      | 1.11E-19  | PDAC   |
| UPP1  | 0.762998467      | 2.03E-21  | PDAC   |
| CDA   | 0.310094488      | 0.2785263 | UCEC   |
| UCK1  | -0.139937351     | 0.0087792 | UCEC   |
| UCK2  | 0.328070801      | 0.0005803 | UCEC   |
| UCKL1 | -0.060871723     | 0.0561264 | UCEC   |
| UPP1  | 0.668064106      | 5.43E-09  | UCEC   |
| CDA   | -0.988096546     | 1.45E-19  | LIHC   |

|       |             |          |      |
|-------|-------------|----------|------|
| UPP1  | 0.231144849 | 2.17E-05 | LIHC |
| UCK2  | 0.580118906 | 1.85E-29 | LIHC |
| UCK1  | -0.43590109 | 3.15E-24 | LIHC |
| UCKL1 | 0.301129878 | 3.99E-24 | LIHC |

**Table S4: Survival analysis of PSPGs in TCGA**

Sheet1: Overall Survival (OS)

Sheet2: Progression-Free Interval (PFI)

Sheet3: Disease-Free Interval (DFI)

Sheet4: Disease-Specific Survival (DSS)

## Sheet1: Overall Survival (OS)

| p-value    | Hazard Ratio | Gene  | Cancer |
|------------|--------------|-------|--------|
| 0.41111485 | 0.70023925   | CDA   | ACC    |
| 0.04665829 | 2.08598782   | UCK1  | ACC    |
| 0.04021058 | 2.15429669   | UCK2  | ACC    |
| 0.01152692 | 2.50730459   | UCKL1 | ACC    |
| 0.04474239 | 2.58983474   | UPP1  | ACC    |
| 0.00047117 | 0.18881115   | UPP2  | ACC    |
| 0.0075247  | 1.50497143   | CDA   | BLCA   |
| 0.16052493 | 0.80766316   | UCK1  | BLCA   |
| 0.1578225  | 1.26358541   | UCK2  | BLCA   |
| 0.01806658 | 0.69757126   | UCKL1 | BLCA   |
| 0.04672127 | 1.34549725   | UPP1  | BLCA   |
| 0.10622622 | 0.77033843   | UPP2  | BLCA   |
| 0.41426034 | 0.86201154   | CDA   | BRCA   |
| 0.30347597 | 1.19309333   | UCK1  | BRCA   |
| 0.01101085 | 1.50361393   | UCK2  | BRCA   |
| 0.20951127 | 1.22219475   | UCKL1 | BRCA   |
| 0.22420578 | 0.81343059   | UPP1  | BRCA   |
| 0.39617349 | 1.14644379   | UPP2  | BRCA   |
| 0.00066446 | 2.17165525   | CDA   | CESC   |
| 0.00098323 | 0.40591406   | UCK1  | CESC   |
| 0.01693048 | 1.74373085   | UCK2  | CESC   |
| 0.03916973 | 0.61368137   | UCKL1 | CESC   |
| 0.02711979 | 1.69900594   | UPP1  | CESC   |
| 0.09859115 | 0.66659397   | UPP2  | CESC   |
| 0.08756151 | 2.1680829    | CDA   | CHOL   |
| 0.03754019 | 0.39500659   | UCK1  | CHOL   |
| 0.12623836 | 0.46719836   | UCK2  | CHOL   |
| 0.03534223 | 0.36758905   | UCKL1 | CHOL   |
| 0.16401495 | 1.96776788   | UPP1  | CHOL   |
| 0.17527944 | 1.89575621   | UPP2  | CHOL   |
| 0.10971602 | 0.72266469   | CDA   | COAD   |
| 0.06403345 | 1.44097389   | UCK1  | COAD   |
| 0.20421597 | 0.76660402   | UCK2  | COAD   |
| 0.39786861 | 1.18906492   | UCKL1 | COAD   |
| 0.07488138 | 1.4231225    | UPP1  | COAD   |
| 0.07790362 | 1.41684049   | UPP2  | COAD   |
| 0.02445861 | 0.2184633    | CDA   | DLBC   |
| 0.01974256 | 0.23136847   | UCK1  | DLBC   |
| 0.08290475 | 0            | UCK2  | DLBC   |
| 0.38717786 | 0.57614197   | UCKL1 | DLBC   |
| 0.506787   | 1.47314588   | UPP1  | DLBC   |
| 0.18945414 | 2.24939049   | UPP2  | DLBC   |
| 0.14229522 | 0.71511325   | CDA   | ESCA   |

|            |            |       |      |
|------------|------------|-------|------|
| 0.22739873 | 0.74332068 | UCK1  | ESCA |
| 0.40526294 | 0.81815657 | UCK2  | ESCA |
| 0.15608836 | 1.41732743 | UCKL1 | ESCA |
| 0.24078168 | 0.75173776 | UPP1  | ESCA |
| 0.32525284 | 0.79257235 | UPP2  | ESCA |
| 0.10067084 | 1.34050921 | CDA   | GBM  |
| 0.24706331 | 0.82116305 | UCK1  | GBM  |
| 0.26665725 | 1.20808949 | UCK2  | GBM  |
| 0.26854565 | 0.82147151 | UCKL1 | GBM  |
| 0.00036138 | 1.81269687 | UPP1  | GBM  |
| 0.35166791 | 0.8426525  | UPP2  | GBM  |
| 0.00114407 | 1.66605803 | CDA   | HNSC |
| 0.1994213  | 0.83604996 | UCK1  | HNSC |
| 0.02110879 | 1.38150111 | UCK2  | HNSC |
| 0.06572455 | 1.29603907 | UCKL1 | HNSC |
| 0.06371389 | 1.32340983 | UPP1  | HNSC |
| 0.3751106  | 0.55635035 | CDA   | KICH |
| 0.04550034 | 0.15868713 | UCK1  | KICH |
| 0.52820741 | 0.64276767 | UCK2  | KICH |
| 0.03311012 | 0.21280742 | UCKL1 | KICH |
| 0.09205265 | 4.98452876 | UPP1  | KICH |
| 0.06658302 | 3.19308885 | UPP2  | KICH |
| 0.02871582 | 1.3951454  | CDA   | KIRC |
| 0.10644606 | 0.77680636 | UCK1  | KIRC |
| 5.08E-09   | 2.35819561 | UCK2  | KIRC |
| 0.00072589 | 1.67481786 | UCKL1 | KIRC |
| 1.40E-06   | 2.37371852 | UPP1  | KIRC |
| 0.0332561  | 0.7148749  | UPP2  | KIRC |
| 0.33205611 | 1.38581203 | CDA   | KIRP |
| 0.05286263 | 0.55782843 | UCK1  | KIRP |
| 3.06E-07   | 4.27223407 | UCK2  | KIRP |
| 0.01945149 | 0.5021721  | UCKL1 | KIRP |
| 0.06396437 | 1.74340681 | UPP1  | KIRP |
| 0.00876907 | 0.46254731 | UPP2  | KIRP |
| 0.15062756 | 1.32999718 | CDA   | LAML |
| 0.08534791 | 1.41747981 | UCK1  | LAML |
| 0.01184251 | 0.60884391 | UCK2  | LAML |
| 0.12777552 | 1.37442313 | UCKL1 | LAML |
| 0.00027275 | 2.0655345  | UPP1  | LAML |
| 0.21998515 | 1.26718062 | UPP2  | LAML |
| 0.21943251 | 1.23745807 | CDA   | LGG  |
| 8.41E-07   | 0.43692567 | UCK1  | LGG  |
| 0.23746995 | 0.81927544 | UCK2  | LGG  |
| 0.17764213 | 1.2657041  | UCKL1 | LGG  |
| 6.56E-12   | 3.06527135 | UPP1  | LGG  |

|            |            |       |      |
|------------|------------|-------|------|
| 4.98E-07   | 0.42984424 | UPP2  | LGG  |
| 0.33851495 | 1.19781294 | CDA   | LIHC |
| 0.18974019 | 0.79113535 | UCK1  | LIHC |
| 6.75E-08   | 2.48783899 | UCK2  | LIHC |
| 0.13609306 | 1.30816661 | UCKL1 | LIHC |
| 0.0028385  | 1.68012809 | UPP1  | LIHC |
| 0.01662615 | 0.65259929 | UPP2  | LIHC |
| 0.00707637 | 1.49728695 | CDA   | LUAD |
| 0.08792851 | 0.77543684 | UCK1  | LUAD |
| 9.05E-07   | 2.03827077 | UCK2  | LUAD |
| 0.03392119 | 0.71647435 | UCKL1 | LUAD |
| 0.00285838 | 1.54829456 | UPP1  | LUAD |
| 0.33664993 | 1.15197799 | UPP2  | LUAD |
| 0.04563236 | 1.33193857 | CDA   | LUSC |
| 0.04365197 | 1.32078801 | UCK1  | LUSC |
| 0.25121679 | 0.84680518 | UCK2  | LUSC |
| 0.2520201  | 1.18023425 | UCKL1 | LUSC |
| 0.02306056 | 1.38147057 | UPP1  | LUSC |
| 0.21627274 | 0.84540367 | UPP2  | LUSC |
| 0.03876617 | 1.63826697 | CDA   | MESO |
| 0.01355224 | 0.56406593 | UCK1  | MESO |
| 3.63E-08   | 3.30651096 | UCK2  | MESO |
| 0.10363677 | 1.45840275 | UCKL1 | MESO |
| 0.00049516 | 2.45721589 | UPP1  | MESO |
| 0.42868763 | 0.83303012 | UPP2  | MESO |
| 0.02986945 | 1.37598113 | CDA   | OV   |
| 0.58852126 | 1.0880271  | UCK1  | OV   |
| 0.03801368 | 0.73255509 | UCK2  | OV   |
| 0.12526219 | 0.79934555 | UCKL1 | OV   |
| 0.35159707 | 1.16255036 | UPP1  | OV   |
| 0.18532171 | 0.81320207 | UPP2  | OV   |
| 0.00024519 | 2.44381398 | CDA   | PAAD |
| 0.00958214 | 0.56003855 | UCK1  | PAAD |
| 0.00219554 | 1.98094189 | UCK2  | PAAD |
| 0.00105972 | 0.4619144  | UCKL1 | PAAD |
| 0.17407145 | 1.33139501 | UPP1  | PAAD |
| 0.22765504 | 0.76161713 | UPP2  | PAAD |
| 0.42239845 | 0.54445793 | CDA   | PCPG |
| 0.31899109 | 1.98940629 | UCK1  | PCPG |
| 0.17188674 | 0.38410735 | UCK2  | PCPG |
| 0.06311121 | 3.99960498 | UCKL1 | PCPG |
| 0.56177633 | 1.51863735 | UPP1  | PCPG |
| 0.01124015 | 0.16932734 | UPP2  | PCPG |
| 0.03443943 | 0.2869923  | CDA   | PRAD |
| 0.21433025 | 0.38957329 | UCK1  | PRAD |

|            |            |       |      |
|------------|------------|-------|------|
| 0.04560646 | 3.55563122 | UCK2  | PRAD |
| 0.06228674 | 5.09252484 | UCKL1 | PRAD |
| 0.04275382 | 0.15747607 | UPP1  | PRAD |
| 0.32237908 | 1.83775547 | UPP2  | PRAD |
| 0.00883628 | 3.35928117 | CDA   | READ |
| 0.01841982 | 2.52090458 | UCK1  | READ |
| 0.48858223 | 1.33332357 | UCK2  | READ |
| 0.45752722 | 0.74049332 | UCKL1 | READ |
| 0.06360308 | 2.10732731 | UPP1  | READ |
| 0.19962067 | 1.68336441 | UPP2  | READ |
| 0.09196011 | 0.70187116 | CDA   | SARC |
| 0.21338088 | 0.76923727 | UCK1  | SARC |
| 0.00884005 | 1.90197787 | UCK2  | SARC |
| 0.0093753  | 1.67033672 | UCKL1 | SARC |
| 0.18678892 | 1.30159035 | UPP1  | SARC |
| 0.06048151 | 1.48729894 | UPP2  | SARC |
| 0.12807089 | 1.25962215 | CDA   | SKCM |
| 0.00127551 | 1.5871551  | UCK1  | SKCM |
| 0.00661782 | 1.45874439 | UCK2  | SKCM |
| 0.03893838 | 1.35124681 | UCKL1 | SKCM |
| 0.01340452 | 1.42358097 | UPP1  | SKCM |
| 0.01201583 | 0.6982518  | UPP2  | SKCM |
| 0.00947128 | 1.51300533 | CDA   | STAD |
| 0.13093886 | 0.7763114  | UCK1  | STAD |
| 0.00217298 | 0.60743853 | UCK2  | STAD |
| 0.27371284 | 1.20226969 | UCKL1 | STAD |
| 0.02270791 | 1.43727586 | UPP1  | STAD |
| 0.5780893  | 1.09426026 | UPP2  | STAD |
| 0.28826003 | 3.18953604 | CDA   | TGCT |
| 0.0336363  | 0          | UCK1  | TGCT |
| 0.12951923 | 0.24615955 | UCK2  | TGCT |
| 0.2697437  | 3.32128389 | UCKL1 | TGCT |
| 0.17022036 | 3.91190694 | UPP1  | TGCT |
| 0.11743623 | 4.99552054 | UPP2  | TGCT |
| 0.08328223 | 2.33067557 | CDA   | THCA |
| 0.25863587 | 0.57522916 | UCK1  | THCA |
| 0.16591018 | 2.17975642 | UCK2  | THCA |
| 0.19009645 | 1.99044343 | UCKL1 | THCA |
| 0.63601108 | 0.77592219 | UPP1  | THCA |
| 0.16846495 | 0.46193287 | UPP2  | THCA |
| 0.17927697 | 0.4197803  | CDA   | THYM |
| 0.30451656 | 0.49771499 | UCK1  | THYM |
| 0.0760392  | 0.33128038 | UCK2  | THYM |
| 0.03431738 | 0.2532235  | UCKL1 | THYM |
| 0.01383882 | Inf        | UPP1  | THYM |



|            |            |       |      |
|------------|------------|-------|------|
| 0.01614834 | 8.04684788 | UPP2  | THYM |
| 0.20588189 | 0.75361535 | CDA   | UCEC |
| 0.00259156 | 0.53126031 | UCK1  | UCEC |
| 0.00306937 | 2.03838238 | UCK2  | UCEC |
| 0.03254356 | 1.585589   | UCKL1 | UCEC |
| 0.0790305  | 0.66270298 | UPP1  | UCEC |
| 0.00091259 | 0.48295432 | UPP2  | UCEC |
| 0.41217981 | 1.3345621  | CDA   | UCS  |
| 0.50602359 | 1.2530989  | UCK1  | UCS  |
| 0.23403515 | 0.65241009 | UCK2  | UCS  |
| 0.26692845 | 1.47529905 | UCKL1 | UCS  |
| 0.42628306 | 0.76549639 | UPP1  | UCS  |
| 0.37775212 | 0.73285483 | UPP2  | UCS  |
| 0.14629225 | 2.03973297 | CDA   | UVM  |
| 0.31689461 | 0.66170224 | UCK1  | UVM  |
| 0.01087467 | 2.95663608 | UCK2  | UVM  |
| 0.08699822 | 3.27024585 | UCKL1 | UVM  |
| 0.00014675 | 4.33766172 | UPP1  | UVM  |

Sheet2: Progression-Free Interval (PFI)

| p-value     | Hazard Ratio | Gene  | Cancer |
|-------------|--------------|-------|--------|
| 0.037887949 | 0.480897392  | CDA   | ACC    |
| 0.042360312 | 1.901569718  | UCK1  | ACC    |
| 0.040430975 | 1.873275291  | UCK2  | ACC    |
| 0.053578273 | 1.82204408   | UCKL1 | ACC    |
| 0.099618989 | 1.840556794  | UPP1  | ACC    |
| 0.000151526 | 0.323293401  | UPP2  | ACC    |
| 0.016958467 | 1.450691817  | CDA   | BLCA   |
| 0.122715947 | 0.79210964   | UCK1  | BLCA   |
| 0.013239637 | 1.456330836  | UCK2  | BLCA   |
| 0.078359246 | 0.759435792  | UCKL1 | BLCA   |
| 0.206849532 | 1.220622391  | UPP1  | BLCA   |
| 0.396221504 | 0.871680955  | UPP2  | BLCA   |
| 0.074721557 | 1.343223449  | CDA   | BRCA   |
| 0.042997214 | 1.390845676  | UCK1  | BRCA   |
| 0.002740054 | 1.632627455  | UCK2  | BRCA   |
| 0.075544732 | 1.38659839   | UCKL1 | BRCA   |
| 0.110814536 | 1.313326842  | UPP1  | BRCA   |
| 0.252816745 | 1.207195026  | UPP2  | BRCA   |
| 0.017244142 | 1.739964952  | CDA   | CESC   |
| 0.006051451 | 0.468076688  | UCK1  | CESC   |
| 0.135191024 | 1.431721703  | UCK2  | CESC   |
| 0.329765344 | 0.782281957  | UCKL1 | CESC   |
| 0.216346267 | 0.746011805  | UPP1  | CESC   |
| 0.56859517  | 0.872737862  | UPP2  | CESC   |
| 0.062619775 | 0.438851295  | CDA   | CHOL   |
| 0.119550963 | 0.509187341  | UCK1  | CHOL   |
| 0.092685478 | 2.085746386  | UCK2  | CHOL   |
| 0.22904113  | 0.582489601  | UCKL1 | CHOL   |
| 0.189024932 | 1.826597102  | UPP1  | CHOL   |
| 0.304442958 | 1.57832836   | UPP2  | CHOL   |
| 0.330531434 | 0.836458572  | CDA   | COAD   |
| 0.105677673 | 1.33886481   | UCK1  | COAD   |
| 0.070650077 | 1.434028475  | UCK2  | COAD   |
| 0.350500826 | 1.184774554  | UCKL1 | COAD   |
| 0.056931158 | 1.431905594  | UPP1  | COAD   |
| 0.426923015 | 0.857211848  | UPP2  | COAD   |
| 0.027682918 | 0.307030285  | CDA   | DLBC   |
| 0.330483555 | 0.586518009  | UCK1  | DLBC   |
| 0.265483301 | 1.843264314  | UCK2  | DLBC   |
| 0.10378801  | 0.410102781  | UCKL1 | DLBC   |
| 0.178079108 | 0.469928948  | UPP1  | DLBC   |
| 0.673176951 | 0.762650777  | UPP2  | DLBC   |
| 0.105949176 | 0.703717747  | CDA   | ESCA   |

|             |             |       |      |
|-------------|-------------|-------|------|
| 0.049194646 | 1.529595332 | UCK1  | ESCA |
| 0.135680987 | 0.704931193 | UCK2  | ESCA |
| 0.004495369 | 2.020816259 | UCKL1 | ESCA |
| 0.064128873 | 0.65140232  | UPP1  | ESCA |
| 0.206886258 | 0.734761072 | UPP2  | ESCA |
| 0.093798678 | 1.37546376  | CDA   | GBM  |
| 0.001899916 | 0.584112405 | UCK1  | GBM  |
| 0.135860635 | 0.773044276 | UCK2  | GBM  |
| 0.488206034 | 1.133566268 | UCKL1 | GBM  |
| 0.000151995 | 1.882696308 | UPP1  | GBM  |
| 0.264053467 | 1.21224414  | UPP2  | GBM  |
| 0.045572994 | 1.376039524 | CDA   | HNSC |
| 0.346160358 | 0.875119601 | UCK1  | HNSC |
| 0.057406416 | 1.324562342 | UCK2  | HNSC |
| 0.001181794 | 1.590509365 | UCKL1 | HNSC |
| 0.198084827 | 1.225071167 | UPP1  | HNSC |
| 0.222999468 | 0.448029309 | CDA   | KICH |
| 0.019416823 | 0.269159414 | UCK1  | KICH |
| 0.337727709 | 1.89239507  | UCK2  | KICH |
| 0.040811676 | 0.31131464  | UCKL1 | KICH |
| 0.034612038 | 6.751907943 | UPP1  | KICH |
| 0.238956328 | 2.009548514 | UPP2  | KICH |
| 0.001894098 | 1.628584321 | CDA   | KIRC |
| 0.005966246 | 0.648414799 | UCK1  | KIRC |
| 8.42E-11    | 2.69213183  | UCK2  | KIRC |
| 0.522486003 | 1.106452592 | UCKL1 | KIRC |
| 4.90E-06    | 2.349224647 | UPP1  | KIRC |
| 0.020453277 | 0.684051611 | UPP2  | KIRC |
| 0.182613235 | 1.486145469 | CDA   | KIRP |
| 0.21595042  | 0.723741352 | UCK1  | KIRP |
| 1.86E-08    | 4.004232899 | UCK2  | KIRP |
| 0.026219247 | 0.543492235 | UCKL1 | KIRP |
| 0.178107309 | 1.436462038 | UPP1  | KIRP |
| 0.009600499 | 0.511424542 | UPP2  | KIRP |
| 0.034367591 | 1.352758014 | CDA   | LGG  |
| 0.004053438 | 0.660409342 | UCK1  | LGG  |
| 0.108807864 | 0.801168149 | UCK2  | LGG  |
| 0.037349404 | 1.355152999 | UCKL1 | LGG  |
| 4.93E-10    | 2.325041224 | UPP1  | LGG  |
| 0.000215408 | 0.594732253 | UPP2  | LGG  |
| 0.46776999  | 0.889633791 | CDA   | LIHC |
| 0.285823479 | 1.175066628 | UCK1  | LIHC |
| 0.000128103 | 1.851246223 | UCK2  | LIHC |
| 0.011085521 | 1.46970723  | UCKL1 | LIHC |
| 0.074322376 | 1.326708397 | UPP1  | LIHC |

|             |             |       |      |
|-------------|-------------|-------|------|
| 0.02128693  | 0.704884916 | UPP2  | LIHC |
| 0.108702303 | 1.26295845  | CDA   | LUAD |
| 0.271320332 | 0.84544307  | UCK1  | LUAD |
| 1.54E-05    | 1.818339144 | UCK2  | LUAD |
| 0.084296767 | 0.771462777 | UCKL1 | LUAD |
| 0.037401899 | 1.332242199 | UPP1  | LUAD |
| 0.098724875 | 0.794371884 | UPP2  | LUAD |
| 0.008642693 | 1.593084131 | CDA   | LUSC |
| 0.014883114 | 1.524940361 | UCK1  | LUSC |
| 0.02653135  | 0.695956625 | UCK2  | LUSC |
| 0.087851655 | 1.323197443 | UCKL1 | LUSC |
| 0.004241509 | 1.618238973 | UPP1  | LUSC |
| 0.235191173 | 0.822725703 | UPP2  | LUSC |
| 0.474389655 | 0.830642505 | CDA   | MESO |
| 0.156856566 | 0.696801176 | UCK1  | MESO |
| 0.019652474 | 1.850145982 | UCK2  | MESO |
| 0.174129736 | 1.457583237 | UCKL1 | MESO |
| 0.018152373 | 1.822430672 | UPP1  | MESO |
| 0.136516274 | 1.468892374 | UPP2  | MESO |
| 0.164148922 | 1.228044774 | CDA   | OV   |
| 0.444361069 | 0.89931942  | UCK1  | OV   |
| 0.313193703 | 1.15567031  | UCK2  | OV   |
| 0.199771585 | 0.834787034 | UCKL1 | OV   |
| 0.167024442 | 0.818074491 | UPP1  | OV   |
| 0.066118014 | 1.289176343 | UPP2  | OV   |
| 0.001173753 | 1.891954329 | CDA   | PAAD |
| 0.00113972  | 0.503438991 | UCK1  | PAAD |
| 0.005495827 | 1.829453897 | UCK2  | PAAD |
| 0.007536432 | 0.57589998  | UCKL1 | PAAD |
| 0.351164474 | 1.224729856 | UPP1  | PAAD |
| 0.031362139 | 0.631640803 | UPP2  | PAAD |
| 0.52584995  | 1.288528528 | CDA   | PCPG |
| 0.160802877 | 1.771622565 | UCK1  | PCPG |
| 0.092397357 | 0.507453274 | UCK2  | PCPG |
| 0.371582567 | 1.514454624 | UCKL1 | PCPG |
| 0.061008956 | 2.128181465 | UPP1  | PCPG |
| 0.003583323 | 0.314420956 | UPP2  | PCPG |
| 0.011365997 | 1.682029683 | CDA   | PRAD |
| 0.01036374  | 1.932827152 | UCK1  | PRAD |
| 0.069611262 | 1.452179515 | UCK2  | PRAD |
| 6.58E-06    | 2.451633745 | UCKL1 | PRAD |
| 0.038212436 | 1.635296369 | UPP1  | PRAD |
| 0.001412736 | 1.911706261 | UPP2  | PRAD |
| 0.025126473 | 2.227809758 | CDA   | READ |
| 0.104419123 | 0.550474036 | UCK1  | READ |

|             |             |       |      |
|-------------|-------------|-------|------|
| 0.078657151 | 1.811421273 | UCK2  | READ |
| 0.127357105 | 1.680241854 | UCKL1 | READ |
| 0.049336171 | 2.100686944 | UPP1  | READ |
| 0.175224373 | 0.570089938 | UPP2  | READ |
| 0.009003186 | 0.607908277 | CDA   | SARC |
| 0.331031845 | 0.847019962 | UCK1  | SARC |
| 0.03131666  | 1.508661966 | UCK2  | SARC |
| 0.161275283 | 1.26939664  | UCKL1 | SARC |
| 0.069624915 | 1.394377451 | UPP1  | SARC |
| 0.154894911 | 1.278426102 | UPP2  | SARC |
| 0.0355559   | 1.269396206 | CDA   | SKCM |
| 0.021468879 | 1.312327099 | UCK1  | SKCM |
| 0.013534943 | 1.373739151 | UCK2  | SKCM |
| 0.16098776  | 0.845375944 | UCKL1 | SKCM |
| 0.040591784 | 1.269388704 | UPP1  | SKCM |
| 0.026620174 | 0.772341739 | UPP2  | SKCM |
| 0.020340099 | 1.485964977 | CDA   | STAD |
| 0.298432984 | 0.835232126 | UCK1  | STAD |
| 0.027127675 | 0.682878948 | UCK2  | STAD |
| 0.076009759 | 0.737689257 | UCKL1 | STAD |
| 0.070328271 | 1.3636834   | UPP1  | STAD |
| 0.211355368 | 1.242486208 | UPP2  | STAD |
| 0.325728606 | 1.365428033 | CDA   | TGCT |
| 0.26988258  | 1.413437308 | UCK1  | TGCT |
| 0.318180119 | 1.374905902 | UCK2  | TGCT |
| 0.008506405 | 2.249802572 | UCKL1 | TGCT |
| 0.235156455 | 1.456700128 | UPP1  | TGCT |
| 0.113447626 | 1.638327115 | UPP2  | TGCT |
| 0.020280687 | 0.493741563 | CDA   | THCA |
| 0.383587199 | 0.787424979 | UCK1  | THCA |
| 0.227272962 | 1.387197803 | UCK2  | THCA |
| 0.212983036 | 1.481695796 | UCKL1 | THCA |
| 0.069647033 | 1.634943274 | UPP1  | THCA |
| 0.00793923  | 0.43074949  | UPP2  | THCA |
| 0.366417581 | 0.668717474 | CDA   | THYM |
| 0.24175716  | 1.744209609 | UCK1  | THYM |
| 0.071040008 | 2.156369394 | UCK2  | THYM |
| 0.17651215  | 0.561509749 | UCKL1 | THYM |
| 0.051406509 | 2.774524659 | UPP1  | THYM |
| 0.076786521 | 0.439830481 | UPP2  | THYM |
| 0.139869444 | 0.758653356 | CDA   | UCEC |
| 0.000833283 | 0.549611487 | UCK1  | UCEC |
| 0.000130594 | 1.993422391 | UCK2  | UCEC |
| 0.014457479 | 1.553926289 | UCKL1 | UCEC |
| 0.186397305 | 1.311197581 | UPP1  | UCEC |

|             |             |       |      |
|-------------|-------------|-------|------|
| 0.017761168 | 0.6499346   | UPP2  | UCEC |
| 0.308363838 | 0.711529491 | CDA   | UCS  |
| 0.16169575  | 0.616505424 | UCK1  | UCS  |
| 0.063221807 | 1.992087474 | UCK2  | UCS  |
| 0.057439947 | 1.93240417  | UCKL1 | UCS  |
| 0.052020651 | 1.970981423 | UPP1  | UCS  |
| 0.365244388 | 0.742074399 | UPP2  | UCS  |
| 0.179773337 | 0.557538447 | CDA   | UVM  |
| 0.27712643  | 0.669335235 | UCK1  | UVM  |
| 0.000559687 | 3.732717821 | UCK2  | UVM  |
| 0.037178923 | 3.278022866 | UCKL1 | UVM  |
| 0.009145053 | 2.467862074 | UPP1  | UVM  |

## Sheet3: Disease-Free Interval (DFI)

| p-value     | Hazard Ratio | Gene  | Cancer |
|-------------|--------------|-------|--------|
| 0.444307525 | 0.599377257  | CDA   | ACC    |
| 0.153097709 | 3.975100151  | UCK1  | ACC    |
| 0.007194767 | 4.575155837  | UCK2  | ACC    |
| 0.045357371 | 0.323864616  | UCKL1 | ACC    |
| 0.34835655  | 2.044567847  | UPP1  | ACC    |
| 0.022144276 | 0.276604988  | UPP2  | ACC    |
| 0.311083296 | 0.693401266  | CDA   | BLCA   |
| 0.381749003 | 1.370116052  | UCK1  | BLCA   |
| 0.171407895 | 1.636391354  | UCK2  | BLCA   |
| 0.003734824 | 0.368154008  | UCKL1 | BLCA   |
| 0.319354822 | 1.460484758  | UPP1  | BLCA   |
| 0.695543341 | 0.857083673  | UPP2  | BLCA   |
| 0.029394925 | 1.618963715  | CDA   | BRCA   |
| 0.010827203 | 1.735537546  | UCK1  | BRCA   |
| 0.027461625 | 1.613665993  | UCK2  | BRCA   |
| 0.137261008 | 1.401890807  | UCKL1 | BRCA   |
| 0.026708306 | 1.624500109  | UPP1  | BRCA   |
| 0.253368003 | 0.774242264  | UPP2  | BRCA   |
| 0.440318905 | 0.737154862  | CDA   | CESC   |
| 0.011565813 | 0.241922978  | UCK1  | CESC   |
| 0.389936799 | 0.708499174  | UCK2  | CESC   |
| 0.160468944 | 0.504415449  | UCKL1 | CESC   |
| 0.052682583 | 0.475003965  | UPP1  | CESC   |
| 0.621573762 | 0.811332167  | UPP2  | CESC   |
| 0.268923958 | 0.497276568  | CDA   | CHOL   |
| 0.666637864 | 0.758188352  | UCK1  | CHOL   |
| 0.535325838 | 1.48745869   | UCK2  | CHOL   |
| 0.34520609  | 0.549988261  | UCKL1 | CHOL   |
| 0.039894074 | Inf          | UPP1  | CHOL   |
| 0.158853455 | 0.346185775  | UPP2  | CHOL   |
| 0.097440625 | 0.480295342  | CDA   | COAD   |
| 0.22120862  | 1.686286583  | UCK1  | COAD   |
| 0.353818021 | 1.540347995  | UCK2  | COAD   |
| 0.037858699 | 2.360773895  | UCKL1 | COAD   |
| 0.088852113 | 0.405109981  | UPP1  | COAD   |
| 0.370663889 | 1.519320865  | UPP2  | COAD   |
| 0.105222869 | 0.305361305  | CDA   | DLBC   |
| 0.222112855 | Inf          | UCK1  | DLBC   |
| 0.362050192 | 0            | UCK2  | DLBC   |
| 0.202521523 | 0.323877069  | UCKL1 | DLBC   |
| 0.34949733  | 0.443298969  | UPP1  | DLBC   |
| 0.725770964 | 1.461538462  | UPP2  | DLBC   |
| 0.060062721 | 0.437393566  | CDA   | ESCA   |

|             |             |       |      |
|-------------|-------------|-------|------|
| 0.005253526 | 3.710448521 | UCK1  | ESCA |
| 0.087642143 | 0.434315321 | UCK2  | ESCA |
| 0.221658703 | 1.655359576 | UCKL1 | ESCA |
| 0.171520343 | 1.959615045 | UPP1  | ESCA |
| 0.613052239 | 0.797929586 | UPP2  | ESCA |
| 0.351357529 | 0.679290573 | CDA   | HNSC |
| 0.237531932 | 1.711012578 | UCK1  | HNSC |
| 0.349820108 | 0.681162607 | UCK2  | HNSC |
| 0.047932644 | 2.041499157 | UCKL1 | HNSC |
| 0.03221797  | 0.441277155 | UPP1  | HNSC |
| 0.310115219 | 0           | CDA   | KICH |
| 0.043981784 | 0.128272251 | UCK1  | KICH |
| 0.208667788 | 4.127659574 | UCK2  | KICH |
| 0.505911907 | 2.210526316 | UCKL1 | KICH |
| 0.084400126 | Inf         | UPP1  | KICH |
| 0.058570291 | Inf         | UPP2  | KICH |
| 0.394651034 | 0.645358189 | CDA   | KIRC |
| 0.268599477 | 1.751369402 | UCK1  | KIRC |
| 0.11163565  | 3.081691495 | UCK2  | KIRC |
| 0.095227366 | 0.396720603 | UCKL1 | KIRC |
| 0.182039014 | 0.436473855 | UPP1  | KIRC |
| 0.252222926 | 1.792994361 | UPP2  | KIRC |
| 0.237190475 | 1.561612591 | CDA   | KIRP |
| 0.088442961 | 0.537501602 | UCK1  | KIRP |
| 0.007733401 | 2.553727187 | UCK2  | KIRP |
| 0.020798042 | 0.38307445  | UCKL1 | KIRP |
| 0.008780211 | 0.355838168 | UPP1  | KIRP |
| 0.25397952  | 0.655093025 | UPP2  | KIRP |
| 0.19069829  | 1.72603774  | CDA   | LGG  |
| 0.035506468 | 2.430803909 | UCK1  | LGG  |
| 0.411116342 | 1.415965794 | UCK2  | LGG  |
| 0.016767832 | 2.927053282 | UCKL1 | LGG  |
| 0.246822227 | 1.86446294  | UPP1  | LGG  |
| 0.071079823 | 0.386760026 | UPP2  | LGG  |
| 0.113511076 | 1.319934797 | CDA   | LIHC |
| 0.04141198  | 1.403960987 | UCK1  | LIHC |
| 7.06E-05    | 2.031449904 | UCK2  | LIHC |
| 0.004088338 | 1.622763676 | UCKL1 | LIHC |
| 0.077191411 | 1.340129767 | UPP1  | LIHC |
| 0.018700167 | 0.671594276 | UPP2  | LIHC |
| 0.075353495 | 1.448572793 | CDA   | LUAD |
| 0.375242508 | 1.204439305 | UCK1  | LUAD |
| 0.007974313 | 1.736598875 | UCK2  | LUAD |
| 0.20271754  | 1.344435614 | UCKL1 | LUAD |
| 0.025922126 | 1.595179393 | UPP1  | LUAD |



|             |             |       |      |
|-------------|-------------|-------|------|
| 0.290325244 | 1.267013441 | UPP2  | LUAD |
| 0.14564289  | 1.489896912 | CDA   | LUSC |
| 9.15E-05    | 3.387703906 | UCK1  | LUSC |
| 0.131620507 | 1.543597935 | UCK2  | LUSC |
| 0.08170156  | 0.564904896 | UCKL1 | LUSC |
| 0.202591169 | 1.388052249 | UPP1  | LUSC |
| 0.465155784 | 0.828810757 | UPP2  | LUSC |
| 0.4729184   | 1.664124466 | CDA   | MESO |
| 0.154162596 | 3.801116936 | UCK1  | MESO |
| 0.015160379 | 4.320459906 | UCK2  | MESO |
| 0.049786013 | 3.866933319 | UCKL1 | MESO |
| 0.085694866 | 3.293505236 | UPP1  | MESO |
| 0.024661013 | 4.890553292 | UPP2  | MESO |
| 0.264681567 | 1.274980467 | CDA   | OV   |
| 0.286975111 | 0.810996721 | UCK1  | OV   |
| 0.204869335 | 0.766581081 | UCK2  | OV   |
| 0.323090033 | 0.820592211 | UCKL1 | OV   |
| 0.456108249 | 0.852870797 | UPP1  | OV   |
| 0.273635326 | 1.239287202 | UPP2  | OV   |
| 0.020501234 | 2.707251602 | CDA   | PAAD |
| 0.005211133 | 0.249377048 | UCK1  | PAAD |
| 0.010243413 | 5.36312997  | UCK2  | PAAD |
| 0.015344086 | 0.363315326 | UCKL1 | PAAD |
| 0.219342064 | 1.775773192 | UPP1  | PAAD |
| 0.017576779 | 0.390367946 | UPP2  | PAAD |
| 0.501641406 | 1.934271951 | CDA   | PCPG |
| 0.069032601 | 0.161530664 | UCK1  | PCPG |
| 0.41106305  | 0.449874164 | UCK2  | PCPG |
| 0.075468379 | 0           | UCKL1 | PCPG |
| 0.286562412 | 0.362705614 | UPP1  | PCPG |
| 0.156294996 | 0           | UPP2  | PCPG |
| 0.055123572 | 1.965101144 | CDA   | PRAD |
| 0.004005132 | 4.847656723 | UCK1  | PRAD |
| 0.071686469 | 1.903069279 | UCK2  | PRAD |
| 2.17E-06    | 4.816201708 | UCKL1 | PRAD |
| 0.014170358 | 2.63222312  | UPP1  | PRAD |
| 0.050464517 | 2.00373061  | UPP2  | PRAD |
| 0.034873332 | 7.177233734 | CDA   | READ |
| 0.055501907 | 0           | UCK1  | READ |
| 0.026780429 | 7.058416491 | UCK2  | READ |
| 0.117461208 | 3.50481341  | UCKL1 | READ |
| 0.27853058  | 3.058253937 | UPP1  | READ |
| 0.800576137 | 1.312407952 | UPP2  | READ |
| 0.038149051 | 0.552173191 | CDA   | SARC |
| 0.085498363 | 0.66309543  | UCK1  | SARC |

|             |             |       |      |
|-------------|-------------|-------|------|
| 0.180975913 | 1.459285343 | UCK2  | SARC |
| 0.102599456 | 1.497938518 | UCKL1 | SARC |
| 0.244118872 | 1.364428116 | UPP1  | SARC |
| 0.237238178 | 0.72500431  | UPP2  | SARC |
| 0.276802283 | 1.392381016 | CDA   | STAD |
| 0.085903242 | 0.599114553 | UCK1  | STAD |
| 0.301483694 | 0.724699227 | UCK2  | STAD |
| 0.497289962 | 1.227053642 | UCKL1 | STAD |
| 0.179710376 | 1.492535452 | UPP1  | STAD |
| 0.495221141 | 1.237240545 | UPP2  | STAD |
| 0.029118732 | 2.12600304  | CDA   | TGCT |
| 0.173550056 | 1.60539924  | UCK1  | TGCT |
| 0.201957428 | 1.56991018  | UCK2  | TGCT |
| 0.016780112 | 2.267572141 | UCKL1 | TGCT |
| 0.096868689 | 1.795735063 | UPP1  | TGCT |
| 0.156034711 | 1.634540164 | UPP2  | TGCT |
| 0.218854697 | 0.599009167 | CDA   | THCA |
| 0.003960863 | 0.335290891 | UCK1  | THCA |
| 0.015716551 | 3.419017376 | UCK2  | THCA |
| 0.023977808 | 0.367200336 | UCKL1 | THCA |
| 0.274167373 | 1.518943949 | UPP1  | THCA |
| 0.002844632 | 0.194554941 | UPP2  | THCA |
| 0.121743849 | 0.655611998 | CDA   | UCEC |
| 0.082333243 | 1.593813931 | UCK1  | UCEC |
| 0.00072257  | 2.419970693 | UCK2  | UCEC |
| 0.033413848 | 1.788759806 | UCKL1 | UCEC |
| 0.221599414 | 1.397373784 | UPP1  | UCEC |
| 0.097031595 | 0.641344229 | UPP2  | UCEC |
| 0.236758632 | 2.460587274 | CDA   | UCS  |
| 0.166679609 | 3.86196881  | UCK1  | UCS  |
| 0.017401004 | 5.325769658 | UCK2  | UCS  |
| 0.217304423 | 2.146006361 | UCKL1 | UCS  |
| 0.168248389 | 0.353760905 | UPP1  | UCS  |
| 0.142742223 | 0.333182628 | UPP2  | UCS  |

Sheet4: Disease-Specific Survival (DSS)

| p-value     | Hazard Ratio | Gene  | Cancer |
|-------------|--------------|-------|--------|
| 0.374867406 | 0.66386686   | CDA   | ACC    |
| 0.028461925 | 2.300091561  | UCK1  | ACC    |
| 0.088987544 | 1.925917738  | UCK2  | ACC    |
| 0.006298878 | 2.790286381  | UCKL1 | ACC    |
| 0.034399287 | 2.978909334  | UPP1  | ACC    |
| 0.000905717 | 0.200738479  | UPP2  | ACC    |
| 0.020801621 | 1.526653279  | CDA   | BLCA   |
| 0.180689492 | 0.783706844  | UCK1  | BLCA   |
| 0.194259445 | 1.30104081   | UCK2  | BLCA   |
| 0.098814816 | 0.735281136  | UCKL1 | BLCA   |
| 0.182861084 | 1.273734155  | UPP1  | BLCA   |
| 0.229555204 | 0.789652648  | UPP2  | BLCA   |
| 0.05943989  | 1.505441387  | CDA   | BRCA   |
| 0.092658485 | 1.434730373  | UCK1  | BRCA   |
| 0.002164338 | 1.941520793  | UCK2  | BRCA   |
| 0.040584782 | 1.619086881  | UCKL1 | BRCA   |
| 0.334072131 | 1.241534904  | UPP1  | BRCA   |
| 0.04660215  | 1.536517529  | UPP2  | BRCA   |
| 0.001540197 | 2.287870782  | CDA   | CESC   |
| 0.001794199 | 0.420310566  | UCK1  | CESC   |
| 0.089200857 | 1.594707208  | UCK2  | CESC   |
| 0.088334943 | 0.629143862  | UCKL1 | CESC   |
| 0.023198142 | 1.846768527  | UPP1  | CESC   |
| 0.618471724 | 1.151003472  | UPP2  | CESC   |
| 0.261954679 | 1.750926314  | CDA   | CHOL   |
| 0.035072398 | 0.370318149  | UCK1  | CHOL   |
| 0.047510082 | 0.371308241  | UCK2  | CHOL   |
| 0.028867677 | 0.329776075  | UCKL1 | CHOL   |
| 0.136237342 | 2.172378663  | UPP1  | CHOL   |
| 0.174875019 | 1.977320445  | UPP2  | CHOL   |
| 0.166991413 | 0.700592515  | CDA   | COAD   |
| 0.084780855 | 1.535331661  | UCK1  | COAD   |
| 0.430105625 | 0.812096731  | UCK2  | COAD   |
| 0.338263801 | 1.272453207  | UCKL1 | COAD   |
| 0.030375283 | 1.726556622  | UPP1  | COAD   |
| 0.060542646 | 1.596567509  | UPP2  | COAD   |
| 0.239123664 | 0.280820675  | CDA   | DLBC   |
| 0.297969331 | 0.368907862  | UCK1  | DLBC   |
| 0.126594522 | 0            | UCK2  | DLBC   |
| 0.129377721 | 0.205975465  | UCKL1 | DLBC   |
| 0.278916864 | 3.25451764   | UPP1  | DLBC   |
| 0.550074957 | 1.790745297  | UPP2  | DLBC   |
| 0.291300328 | 0.743377517  | CDA   | ESCA   |

|             |             |       |      |
|-------------|-------------|-------|------|
| 0.573084375 | 0.854831701 | UCK1  | ESCA |
| 0.340044891 | 0.752215907 | UCK2  | ESCA |
| 0.031967055 | 1.992064928 | UCKL1 | ESCA |
| 0.31989223  | 0.742718949 | UPP1  | ESCA |
| 0.298459314 | 0.737152577 | UPP2  | ESCA |
| 0.131474984 | 1.315284068 | CDA   | GBM  |
| 0.086502578 | 0.735622609 | UCK1  | GBM  |
| 0.38828535  | 0.854558519 | UCK2  | GBM  |
| 0.234005745 | 0.799780467 | UCKL1 | GBM  |
| 0.000737379 | 1.814831271 | UPP1  | GBM  |
| 0.509571553 | 0.882074852 | UPP2  | GBM  |
| 0.001496535 | 1.949166442 | CDA   | HNSC |
| 0.156624109 | 0.781664323 | UCK1  | HNSC |
| 0.043629351 | 1.449086248 | UCK2  | HNSC |
| 0.051642721 | 1.417660351 | UCKL1 | HNSC |
| 0.061781163 | 1.450798803 | UPP1  | HNSC |
| 0.100503984 | 0.277024509 | CDA   | KICH |
| 0.09759685  | 0.201044603 | UCK1  | KICH |
| 0.464007756 | 1.828072006 | UCK2  | KICH |
| 0.005878281 | 0.140129007 | UCKL1 | KICH |
| 0.179293248 | 3.838668757 | UPP1  | KICH |
| 0.072526769 | 3.594698783 | UPP2  | KICH |
| 0.001243568 | 1.838291176 | CDA   | KIRC |
| 0.087834253 | 0.715919527 | UCK1  | KIRC |
| 2.33E-12    | 3.713296754 | UCK2  | KIRC |
| 0.029612187 | 1.513855143 | UCKL1 | KIRC |
| 4.52E-07    | 2.680552309 | UPP1  | KIRC |
| 0.026143096 | 0.646851701 | UPP2  | KIRC |
| 0.135530557 | 2.052978946 | CDA   | KIRP |
| 0.100051497 | 0.539328013 | UCK1  | KIRP |
| 2.51E-12    | 16.22247688 | UCK2  | KIRP |
| 0.002249884 | 0.326088664 | UCKL1 | KIRP |
| 0.030299351 | 2.218472361 | UPP1  | KIRP |
| 8.90E-05    | 0.241224596 | UPP2  | KIRP |
| 0.082427282 | 1.377493128 | CDA   | LGG  |
| 4.32E-06    | 0.442849118 | UCK1  | LGG  |
| 0.287201248 | 0.827846342 | UCK2  | LGG  |
| 0.207014385 | 1.262938011 | UCKL1 | LGG  |
| 2.44E-11    | 3.128031437 | UPP1  | LGG  |
| 1.26E-06    | 0.424708372 | UPP2  | LGG  |
| 0.126917934 | 1.405492915 | CDA   | LIHC |
| 0.455473063 | 1.192739772 | UCK1  | LIHC |
| 0.000335648 | 2.610044239 | UCK2  | LIHC |
| 0.016713593 | 1.707606836 | UCKL1 | LIHC |
| 0.045392871 | 1.563720787 | UPP1  | LIHC |

|             |             |       |      |
|-------------|-------------|-------|------|
| 0.091134644 | 0.681619179 | UPP2  | LIHC |
| 0.019999526 | 1.54581841  | CDA   | LUAD |
| 0.107540472 | 0.733715874 | UCK1  | LUAD |
| 1.72E-05    | 2.207251119 | UCK2  | LUAD |
| 0.020004255 | 0.620535358 | UCKL1 | LUAD |
| 0.062772449 | 1.417667078 | UPP1  | LUAD |
| 0.199957227 | 0.784495543 | UPP2  | LUAD |
| 0.026258688 | 1.660901822 | CDA   | LUSC |
| 0.069769302 | 1.500586497 | UCK1  | LUSC |
| 0.116474459 | 1.451371717 | UCK2  | LUSC |
| 0.073559363 | 1.490527833 | UCKL1 | LUSC |
| 0.011779027 | 1.717898533 | UPP1  | LUSC |
| 0.033400469 | 0.635537533 | UPP2  | LUSC |
| 0.13691948  | 1.588903058 | CDA   | MESO |
| 0.020521309 | 0.500876442 | UCK1  | MESO |
| 0.00020017  | 4.01866573  | UCK2  | MESO |
| 0.370269075 | 1.342617051 | UCKL1 | MESO |
| 0.001235306 | 3.251242701 | UPP1  | MESO |
| 0.158750998 | 1.530313053 | UPP2  | MESO |
| 0.101372205 | 1.299357699 | CDA   | OV   |
| 0.462581671 | 1.126728847 | UCK1  | OV   |
| 0.05770001  | 0.732755442 | UCK2  | OV   |
| 0.024562095 | 0.701181219 | UCKL1 | OV   |
| 0.255144114 | 0.83089938  | UPP1  | OV   |
| 0.145654134 | 1.260591974 | UPP2  | OV   |
| 0.000468649 | 2.374109762 | CDA   | PAAD |
| 0.038993758 | 0.57739751  | UCK1  | PAAD |
| 0.013803455 | 1.852698596 | UCK2  | PAAD |
| 0.001007764 | 0.405066159 | UCKL1 | PAAD |
| 0.109690371 | 1.458111156 | UPP1  | PAAD |
| 0.313466668 | 0.775225388 | UPP2  | PAAD |
| 0.48447092  | 0.589905363 | CDA   | PCPG |
| 0.091948098 | 3.848932842 | UCK1  | PCPG |
| 0.164628673 | 0.321288896 | UCK2  | PCPG |
| 0.247729471 | 2.586168698 | UCKL1 | PCPG |
| 0.350348754 | 0.476650276 | UPP1  | PCPG |
| 0.000594013 | 0           | UPP2  | PCPG |
| 0.285876354 | 0.417286108 | CDA   | PRAD |
| 0.338169941 | 2.333624012 | UCK1  | PRAD |
| 0.096943697 | Inf         | UCK2  | PRAD |
| 0.226723523 | 3.147139055 | UCKL1 | PRAD |
| 0.064128756 | 0           | UPP1  | PRAD |
| 0.258052945 | 0.371889984 | UPP2  | PRAD |
| 0.038114263 | 4.318609059 | CDA   | READ |
| 0.085345584 | 2.581842166 | UCK1  | READ |

|             |             |       |      |
|-------------|-------------|-------|------|
| 0.407436963 | 0.62079435  | UCK2  | READ |
| 0.021239821 | 3.524051558 | UCKL1 | READ |
| 0.229642695 | 1.985376399 | UPP1  | READ |
| 0.166743913 | 0.460150617 | UPP2  | READ |
| 0.050027934 | 0.641001715 | CDA   | SARC |
| 0.134968402 | 0.702895639 | UCK1  | SARC |
| 0.012473092 | 1.976042382 | UCK2  | SARC |
| 0.050586285 | 1.532201866 | UCKL1 | SARC |
| 0.156136725 | 1.363546125 | UPP1  | SARC |
| 0.111459797 | 1.45456647  | UPP2  | SARC |
| 0.27760427  | 1.175864694 | CDA   | SKCM |
| 0.001354112 | 1.630020759 | UCK1  | SKCM |
| 0.005932766 | 1.500178564 | UCK2  | SKCM |
| 0.03096649  | 1.395959046 | UCKL1 | SKCM |
| 0.006769024 | 1.503235255 | UPP1  | SKCM |
| 0.028918317 | 0.717181136 | UPP2  | SKCM |
| 0.035469182 | 1.532535809 | CDA   | STAD |
| 0.05223418  | 0.666151524 | UCK1  | STAD |
| 0.001835213 | 0.528652825 | UCK2  | STAD |
| 0.265998952 | 0.796205748 | UCKL1 | STAD |
| 0.102948481 | 1.395222766 | UPP1  | STAD |
| 0.22801421  | 1.284521315 | UPP2  | STAD |
| 0.219635029 | 0           | CDA   | TGCT |
| 0.036847646 | 0           | UCK1  | TGCT |
| 0.129519231 | 0           | UCK2  | TGCT |
| 0.48617101  | 2.290775769 | UCKL1 | TGCT |
| 0.212627401 | 4.084362815 | UPP1  | TGCT |
| 0.014363547 | Inf         | UPP2  | TGCT |
| 0.242422749 | 2.374470563 | CDA   | THCA |
| 0.066022547 | 4.120534643 | UCK1  | THCA |
| 0.288952002 | 2.201518612 | UCK2  | THCA |
| 0.013881308 | Inf         | UCKL1 | THCA |
| 0.304476417 | 0.346859318 | UPP1  | THCA |
| 0.171523931 | 3.919489216 | UPP2  | THCA |
| 0.4190845   | 0.456007801 | CDA   | THYM |
| 0.35684919  | 0.372498818 | UCK1  | THYM |
| 0.010730215 | Inf         | UCK2  | THYM |
| 0.119422583 | 4.951489255 | UCKL1 | THYM |
| 0.00923931  | Inf         | UPP1  | THYM |
| 0.074591779 | 4.787695316 | UPP2  | THYM |
| 0.114023671 | 0.655956755 | CDA   | UCEC |
| 0.00020115  | 0.392150139 | UCK1  | UCEC |
| 0.03277507  | 1.734469938 | UCK2  | UCEC |
| 0.163580539 | 1.45139199  | UCKL1 | UCEC |
| 0.147388413 | 0.661602081 | UPP1  | UCEC |

|             |             |       |      |
|-------------|-------------|-------|------|
| 0.002169744 | 0.450850911 | UPP2  | UCEC |
| 0.128920258 | 1.728487853 | CDA   | UCS  |
| 0.420967734 | 1.334601175 | UCK1  | UCS  |
| 0.292374274 | 1.489653976 | UCK2  | UCS  |
| 0.276151645 | 1.515111038 | UCKL1 | UCS  |
| 0.343500943 | 1.398737044 | UPP1  | UCS  |
| 0.132369938 | 0.575464826 | UPP2  | UCS  |
| 0.12177569  | 2.299496982 | CDA   | UVM  |
| 0.152251795 | 0.531482274 | UCK1  | UVM  |
| 0.002594727 | 3.808697892 | UCK2  | UVM  |
| 0.121850418 | 2.960541216 | UCKL1 | UVM  |
| 0.000330529 | 4.38508169  | UPP1  | UVM  |

**Table S5: Functional enrichment analysis of PSPGs**

Sheet1: Correlation between PSPGs and TME-, Metabolism-, and Proliferation/

Sheet2: Correlation between PSPGs and cytokines in different cancers

Sheet3: Correlation between PSPGs and checkpoints in different cancers



Metastasis- associated biological terms in different cancers

Sheet1: Correlation between PSPGs and TME-, Metabolism-, and Prolife

| Gene | Terms                      | Cancer | Correlation  |
|------|----------------------------|--------|--------------|
| CDA  | Abnormal plasma cell       | ACC    | -0.073435088 |
| CDA  | Activated b cell           | ACC    | 0.122414268  |
| CDA  | Activated cd4+ t cell      | ACC    | 0.369066548  |
| CDA  | Activated t cell           | ACC    | 0.314759172  |
| CDA  | Alanine, aspartate and glu | ACC    | -0.348990621 |
| CDA  | Alcala_apoptosis           | ACC    | 0.071665177  |
| CDA  | Alpha-linolenic acid meta  | ACC    | 0.062701859  |
| CDA  | Amino sugar and nucleoti   | ACC    | -0.039531868 |
| CDA  | Ampk_pathway               | ACC    | -0.387868817 |
| CDA  | Angiogenesis               | ACC    | 0.236373846  |
| CDA  | Arachidonic acid metabol   | ACC    | 0.303181037  |
| CDA  | Arginine and proline metæ  | ACC    | 0.042507435  |
| CDA  | Arginine biosynthesis      | ACC    | -0.169828466 |
| CDA  | Ascorbate and aldarate mε  | ACC    | -0.047731291 |
| CDA  | Atypical memory b cell     | ACC    | 0.036133447  |
| CDA  | Axl+siglec6+ dendritic ce  | ACC    | 0.285979865  |
| CDA  | B cell                     | ACC    | 0.304436635  |
| CDA  | B1 cell                    | ACC    | -0.081590556 |
| CDA  | Basal cell                 | ACC    | 0.32783619   |
| CDA  | Beta-alanine metabolism    | ACC    | 0.037258878  |
| CDA  | Biosynthesis of unsaturate | ACC    | -0.089069529 |
| CDA  | Biotin metabolism          | ACC    | 0.027961608  |
| CDA  | Butanoate metabolism       | ACC    | -0.143559513 |
| CDA  | Caffeine metabolism        | ACC    | -0.034021016 |
| CDA  | Cancer stem cell           | ACC    | 0.278680897  |
| CDA  | Cancer stem-like cell      | ACC    | 0.154041429  |
| CDA  | Cd4+ cytotoxic t cell      | ACC    | 0.377642591  |
| CDA  | Cd4+ memory t cell         | ACC    | 0.020872551  |
| CDA  | Cd4+ regulatory t cell     | ACC    | 0.356603567  |
| CDA  | Cd4+ t helper cell         | ACC    | 0.409656064  |
| CDA  | Cd4+cd25+ regulatory t c   | ACC    | 0.378987884  |
| CDA  | Cd8+ cytotoxic t cell      | ACC    | 0.403966189  |
| CDA  | Cd8+ regulatory t cell     | ACC    | 0.286364252  |
| CDA  | Cell_cycle                 | ACC    | -0.297117595 |
| CDA  | Chandran_metastasis_top&   | ACC    | -0.493332618 |
| CDA  | Citrate cycle (tca cycle)  | ACC    | -0.209441161 |
| CDA  | Cysteine and methionine r  | ACC    | -0.185947376 |
| CDA  | Cytokine induced killer cε | ACC    | 0.190759425  |
| CDA  | D-arginine and d-ornithin  | ACC    | -0.052891712 |
| CDA  | D-glutamine and d-glutan   | ACC    | -0.248693456 |
| CDA  | Dendritic cell             | ACC    | 0.348578902  |

|     |                              |     |              |
|-----|------------------------------|-----|--------------|
| CDA | Dna_repair                   | ACC | -0.08750107  |
| CDA | Dna_replication              | ACC | -0.159749286 |
| CDA | Double-negative memory       | ACC | 0.200840031  |
| CDA | Drug metabolism - cytoch     | ACC | 0.220004052  |
| CDA | Drug metabolism - other      | ACC | 0.247266829  |
| CDA | E2f_targets                  | ACC | -0.238703253 |
| CDA | Ecm_receptor_interaction     | ACC | 0.06204823   |
| CDA | Effector cd4+ memory t       | ACC | 0.321655733  |
| CDA | Effector cd8+ memory t       | ACC | 0.351050682  |
| CDA | Effector memory t cell       | ACC | 0.260889656  |
| CDA | Effector regulatory t (treg) | ACC | 0.335301978  |
| CDA | Elvidge_hif1a_targets_up     | ACC | -0.175455036 |
| CDA | Endothelial cell             | ACC | 0.350600786  |
| CDA | Eosinophil                   | ACC | 0.399109032  |
| CDA | Ether lipid metabolism       | ACC | -0.059049896 |
| CDA | Exhausted cd4+ t cell        | ACC | 0.16753993   |
| CDA | Exhausted cd8+ t cell        | ACC | 0.248131529  |
| CDA | Exhausted t cell             | ACC | 0.411877142  |
| CDA | Fat cell (adipocyte)         | ACC | 0.140980563  |
| CDA | Fatty acid biosynthesis      | ACC | 0.026865717  |
| CDA | Fatty acid degradation       | ACC | -0.089753973 |
| CDA | Fatty acid elongation        | ACC | -0.079838762 |
| CDA | Fibroblast                   | ACC | 0.285065195  |
| CDA | Folate biosynthesis          | ACC | -0.084016703 |
| CDA | Follicular b cell            | ACC | 0.351182703  |
| CDA | Follicular dendritic cell    | ACC | 0.079992767  |
| CDA | Follicular helper (tfh) t ce | ACC | 0.240344505  |
| CDA | Follicular t cell            | ACC | 0.386992046  |
| CDA | Foxp3+il-17+ t cell          | ACC | 0.114911498  |
| CDA | Fructose and mannose me      | ACC | -0.075929585 |
| CDA | G2m_checkpoint               | ACC | -0.283004766 |
| CDA | Galactose metabolism         | ACC | -0.124886501 |
| CDA | Galie_tumor_stemness_ge      | ACC | 0.003508411  |
| CDA | Glutathione metabolism       | ACC | 0.187756834  |
| CDA | Glycerolipid metabolism      | ACC | 0.020198792  |
| CDA | Glycerophospholipid metε     | ACC | 0.084575447  |
| CDA | Glycine, serine and threor   | ACC | 0.008507078  |
| CDA | Glycolysis / gluconeogene    | ACC | -0.19415433  |
| CDA | Glycosaminoglycan biosy1     | ACC | 0.261854491  |
| CDA | Glycosaminoglycan biosy1     | ACC | -0.201399462 |
| CDA | Glycosaminoglycan biosy1     | ACC | 0.056955026  |
| CDA | Glycosaminoglycan degra      | ACC | 0.063211295  |
| CDA | Glycosphingolipid biosyn1    | ACC | -0.151230908 |

|     |                           |     |              |
|-----|---------------------------|-----|--------------|
| CDA | Glycosphingolipid biosyn  | ACC | 0.264144635  |
| CDA | Glycosphingolipid biosyn  | ACC | 0.050054198  |
| CDA | Glycosylphosphatidylinos  | ACC | -0.109205155 |
| CDA | Glyoxylate and dicarboxy  | ACC | -0.215496827 |
| CDA | Granulocyte               | ACC | 0.386380492  |
| CDA | Hedgehog_signaling        | ACC | -0.213041094 |
| CDA | Histidine metabolism      | ACC | 0.301414668  |
| CDA | Hypoxia                   | ACC | -0.009071213 |
| CDA | Il-17alpha t cell         | ACC | 0.186692738  |
| CDA | Il2_stat5_signaling       | ACC | 0.339030957  |
| CDA | Il6_jak_stat3_signaling   | ACC | 0.309243277  |
| CDA | Immune_checkpoints_tur    | ACC | 0.21955702   |
| CDA | Immune_inhibition_cytok   | ACC | 0.424076631  |
| CDA | Inositol phosphate metabo | ACC | -0.228267396 |
| CDA | Interleukin_6_signaling   | ACC | -0.000581916 |
| CDA | Jaeger_metastasis_up      | ACC | -0.147351863 |
| CDA | Jain_nfkb_signaling       | ACC | -0.180055828 |
| CDA | Kras_signaling_up         | ACC | 0.402740967  |
| CDA | Linoleic acid metabolism  | ACC | 0.045914471  |
| CDA | Lipoic acid metabolism    | ACC | 0.204606705  |
| CDA | Lysine degradation        | ACC | -0.255964387 |
| CDA | Lysosome                  | ACC | -0.021250711 |
| CDA | M1 macrophage             | ACC | 0.274037237  |
| CDA | M2 macrophage             | ACC | 0.352854528  |
| CDA | Mannose type o-glycan bi  | ACC | -0.211938979 |
| CDA | Mapk_signaling_pathway    | ACC | 0.023384909  |
| CDA | Mapk3_erk1_activation     | ACC | -0.219725702 |
| CDA | Marginal zone b cell      | ACC | 0.163640976  |
| CDA | Memory b cell             | ACC | 0.289866231  |
| CDA | Mesenchymal cell          | ACC | 0.281607497  |
| CDA | Mesenchymal stem cell     | ACC | 0.327845388  |
| CDA | Metabolism of xenobiotic  | ACC | 0.294055915  |
| CDA | Migrating cancer stem cel | ACC | 0.067309582  |
| CDA | Mitotic_spindle           | ACC | -0.432366776 |
| CDA | Monocyte                  | ACC | 0.399463775  |
| CDA | Mtor_signaling_pathway    | ACC | -0.09774139  |
| CDA | Mtorc1_signaling          | ACC | -0.229652415 |
| CDA | Mucin type o-glycan biosy | ACC | -0.253089814 |
| CDA | Myc_targets_v1            | ACC | -0.1727767   |
| CDA | Myeloid cell              | ACC | 0.367921167  |
| CDA | N-glycan biosynthesis     | ACC | -0.333379157 |
| CDA | Naive b cell              | ACC | 0.29202317   |
| CDA | Naive cd4+ t cell         | ACC | 0.290262768  |

|     |                                          |     |              |
|-----|------------------------------------------|-----|--------------|
| CDA | Naive cd8+ t cell                        | ACC | 0.064279332  |
| CDA | Natural killer cell                      | ACC | 0.330449317  |
| CDA | Natural killer t (nkt) cell              | ACC | 0.189214418  |
| CDA | Natural regulatory t (treg)              | ACC | 0.172690089  |
| CDA | Neomycin, kanamycin and                  | ACC | 0.016074307  |
| CDA | Neutrophil                               | ACC | 0.406446127  |
| CDA | Nicotinate and nicotinamide              | ACC | -0.00846191  |
| CDA | Nitrogen metabolism                      | ACC | -0.133186119 |
| CDA | Nod_like_receptor_signaling              | ACC | 0.260300671  |
| CDA | Notch_signaling                          | ACC | 0.278121092  |
| CDA | One carbon pool by folate                | ACC | -0.176987495 |
| CDA | Other glycan degradation                 | ACC | -0.0168833   |
| CDA | Other types of o-glycan biosynthesis     | ACC | -0.078151234 |
| CDA | Oxidative phosphorylation                | ACC | 0.167126168  |
| CDA | P53_pathway                              | ACC | 0.3167243    |
| CDA | P53_signaling_pathway                    | ACC | -0.220275432 |
| CDA | Pantothenate and coenzyme biosynthesis   | ACC | 0.201445755  |
| CDA | Pentose and glucuronate interconversions | ACC | 0.040214005  |
| CDA | Pentose phosphate pathway                | ACC | -0.120556863 |
| CDA | Pericyte                                 | ACC | 0.331475243  |
| CDA | Phenylalanine metabolism                 | ACC | 0.190947311  |
| CDA | Phenylalanine, tyrosine and tryptophan   | ACC | 0.069612121  |
| CDA | Phosphonate and phosphite metabolism     | ACC | 0.074603946  |
| CDA | Pi3k_akt_activation                      | ACC | -0.112451452 |
| CDA | Pi3k_akt_mtor_signaling                  | ACC | -0.119696348 |
| CDA | Porphyrin and chlorophyll metabolism     | ACC | -0.056403082 |
| CDA | Primary bile acid biosynthesis           | ACC | 0.125921042  |
| CDA | Propanoate metabolism                    | ACC | -0.305089123 |
| CDA | Purine metabolism                        | ACC | -0.102827142 |
| CDA | Pyrimidine metabolism                    | ACC | -0.110880977 |
| CDA | Pyruvate metabolism                      | ACC | -0.239091342 |
| CDA | Regulation_of_autophagy                  | ACC | -0.179206835 |
| CDA | Retinol metabolism                       | ACC | 0.062063206  |
| CDA | Riboflavin metabolism                    | ACC | 0.025905589  |
| CDA | Schmahl_pdgf_signaling                   | ACC | 0.171949751  |
| CDA | Selenocompound metabolism                | ACC | -0.247695743 |
| CDA | Signaling_by_hippo                       | ACC | -0.397451689 |
| CDA | Sphingolipid metabolism                  | ACC | -0.419720965 |
| CDA | Starch and sucrose metabolism            | ACC | 0.032137997  |
| CDA | Steroid biosynthesis                     | ACC | -0.179199416 |
| CDA | Steroid hormone biosynthesis             | ACC | 0.05553057   |
| CDA | Sulfur metabolism                        | ACC | -0.164782386 |
| CDA | Synthesis and degradation                | ACC | -0.11465317  |

|      |                            |     |              |
|------|----------------------------|-----|--------------|
| CDA  | T helper cell              | ACC | 0.302594308  |
| CDA  | T helper1 (th1) cell       | ACC | 0.371002635  |
| CDA  | T helper17 (th17) cell     | ACC | 0.329491118  |
| CDA  | T helper2 (th2) cell       | ACC | 0.405359746  |
| CDA  | T helper9 (th9) cell       | ACC | 0.379738306  |
| CDA  | Taurine and hypotaurine r  | ACC | 0.088990581  |
| CDA  | Terpenoid backbone biosy   | ACC | -0.210562882 |
| CDA  | Tgf_beta_signaling_pathw   | ACC | -0.032637747 |
| CDA  | Thiamine metabolism        | ACC | -0.045211366 |
| CDA  | Tnfa_signaling_via_nfkb    | ACC | 0.28861838   |
| CDA  | Tryptophan metabolism      | ACC | 0.07791304   |
| CDA  | Tumor endothelial cell     | ACC | 0.03200154   |
| CDA  | Tyrosine metabolism        | ACC | 0.215215422  |
| CDA  | Ubiquinone and other terp  | ACC | -0.093916994 |
| CDA  | Valine, leucine and isoleu | ACC | 0.146792031  |
| CDA  | Valine, leucine and isoleu | ACC | -0.241649857 |
| CDA  | Vascular endothelial cell  | ACC | 0.401044715  |
| CDA  | Vascular smooth muscle c   | ACC | 0.372430864  |
| CDA  | Vegf_signaling_pathway     | ACC | 0.098755683  |
| CDA  | Vitamin b6 metabolism      | ACC | -0.261969707 |
| CDA  | Willert_wnt_signaling      | ACC | -0.122415778 |
| CDA  | Wnt_beta_catenin_signali   | ACC | 0.005186458  |
| UCK1 | Abnormal plasma cell       | ACC | 0.147946341  |
| UCK1 | Activated b cell           | ACC | -0.087680997 |
| UCK1 | Activated cd4+ t cell      | ACC | -0.185745809 |
| UCK1 | Activated t cell           | ACC | -0.123831956 |
| UCK1 | Alanine, aspartate and glu | ACC | -0.275883603 |
| UCK1 | Alcala_apoptosis           | ACC | -0.146808669 |
| UCK1 | Alpha-linolenic acid meta  | ACC | 0.221249964  |
| UCK1 | Amino sugar and nucleoti   | ACC | -0.184081955 |
| UCK1 | Ampk_pathway               | ACC | 0.191595175  |
| UCK1 | Angiogenesis               | ACC | -0.053436678 |
| UCK1 | Arachidonic acid metabol   | ACC | 0.173951915  |
| UCK1 | Arginine and proline metε  | ACC | -0.171974906 |
| UCK1 | Arginine biosynthesis      | ACC | -0.402608799 |
| UCK1 | Ascorbate and aldarate mε  | ACC | -0.107389706 |
| UCK1 | Atypical memory b cell     | ACC | -0.090863061 |
| UCK1 | Axl+siglec6+ dendritic ce  | ACC | -0.042001814 |
| UCK1 | B cell                     | ACC | -0.230160629 |
| UCK1 | B1 cell                    | ACC | -0.134592933 |
| UCK1 | Basal cell                 | ACC | -0.104729207 |
| UCK1 | Beta-alanine metabolism    | ACC | -0.092923011 |
| UCK1 | Biosynthesis of unsaturate | ACC | 0.091951658  |

|      |                             |     |              |
|------|-----------------------------|-----|--------------|
| UCK1 | Biotin metabolism           | ACC | 0.016429077  |
| UCK1 | Butanoate metabolism        | ACC | -0.066514817 |
| UCK1 | Caffeine metabolism         | ACC | -0.035174104 |
| UCK1 | Cancer stem cell            | ACC | -0.230930902 |
| UCK1 | Cancer stem-like cell       | ACC | -0.149441588 |
| UCK1 | Cd4+ cytotoxic t cell       | ACC | -0.149094698 |
| UCK1 | Cd4+ memory t cell          | ACC | -0.262576726 |
| UCK1 | Cd4+ regulatory t cell      | ACC | -0.086927054 |
| UCK1 | Cd4+ t helper cell          | ACC | -0.121067366 |
| UCK1 | Cd4+cd25+ regulatory t c    | ACC | -0.149914665 |
| UCK1 | Cd8+ cytotoxic t cell       | ACC | -0.163812972 |
| UCK1 | Cd8+ regulatory t cell      | ACC | -0.15506034  |
| UCK1 | Cell_cycle                  | ACC | 0.080299363  |
| UCK1 | Chandran_metastasis_top5    | ACC | -0.233675365 |
| UCK1 | Citrate cycle (tca cycle)   | ACC | -0.147110153 |
| UCK1 | Cysteine and methionine r   | ACC | -0.16129961  |
| UCK1 | Cytokine induced killer cε  | ACC | 0.056673338  |
| UCK1 | D-arginine and d-ornithin   | ACC | 0.061166671  |
| UCK1 | D-glutamine and d-glutan    | ACC | -0.298500187 |
| UCK1 | Dendritic cell              | ACC | -0.200834387 |
| UCK1 | Dna_repair                  | ACC | 0.311595181  |
| UCK1 | Dna_replication             | ACC | 0.156208715  |
| UCK1 | Double-negative memory      | ACC | 0.035527737  |
| UCK1 | Drug metabolism - cytoch    | ACC | -0.04001795  |
| UCK1 | Drug metabolism - other ε   | ACC | 0.161252392  |
| UCK1 | E2f_targets                 | ACC | 0.097457021  |
| UCK1 | Ecm_receptor_interaction    | ACC | -0.272781218 |
| UCK1 | Effector cd4+ memory t (    | ACC | -0.233168554 |
| UCK1 | Effector cd8+ memory t (    | ACC | -0.195839332 |
| UCK1 | Effector memory t cell      | ACC | -0.199879493 |
| UCK1 | Effector regulatory t (treg | ACC | -0.188516469 |
| UCK1 | Elvidge_hif1a_targets_up    | ACC | -0.319769248 |
| UCK1 | Endothelial cell            | ACC | -0.128363061 |
| UCK1 | Eosinophil                  | ACC | -0.148117961 |
| UCK1 | Ether lipid metabolism      | ACC | 0.012186996  |
| UCK1 | Exhausted cd4+ t cell       | ACC | -0.288154932 |
| UCK1 | Exhausted cd8+ t cell       | ACC | -0.284313125 |
| UCK1 | Exhausted t cell            | ACC | -0.105161687 |
| UCK1 | Fat cell (adipocyte)        | ACC | 0.132736397  |
| UCK1 | Fatty acid biosynthesis     | ACC | -0.146705311 |
| UCK1 | Fatty acid degradation      | ACC | -0.1165903   |
| UCK1 | Fatty acid elongation       | ACC | -0.037199997 |
| UCK1 | Fibroblast                  | ACC | -0.181390798 |

|      |                                       |     |              |
|------|---------------------------------------|-----|--------------|
| UCK1 | Folate biosynthesis                   | ACC | 0.165542579  |
| UCK1 | Follicular b cell                     | ACC | -0.146569543 |
| UCK1 | Follicular dendritic cell             | ACC | -0.260120577 |
| UCK1 | Follicular helper (tfh) t ce          | ACC | -0.166629714 |
| UCK1 | Follicular t cell                     | ACC | 0.12729941   |
| UCK1 | Foxp3+il-17+ t cell                   | ACC | 0.208018132  |
| UCK1 | Fructose and mannose me               | ACC | -0.112345185 |
| UCK1 | G2m_checkpoint                        | ACC | 0.045681627  |
| UCK1 | Galactose metabolism                  | ACC | -0.012558517 |
| UCK1 | Galie_tumor_stemness_ge               | ACC | -0.077946376 |
| UCK1 | Glutathione metabolism                | ACC | -0.01030217  |
| UCK1 | Glycerolipid metabolism               | ACC | 0.063739593  |
| UCK1 | Glycerophospholipid metε              | ACC | 0.094524086  |
| UCK1 | Glycine, serine and threor            | ACC | -0.031995508 |
| UCK1 | Glycolysis / gluconeogene             | ACC | -0.140798772 |
| UCK1 | Glycosaminoglycan biosy <sub>1</sub>  | ACC | -0.047694758 |
| UCK1 | Glycosaminoglycan biosy <sub>1</sub>  | ACC | -0.148278999 |
| UCK1 | Glycosaminoglycan biosy <sub>1</sub>  | ACC | -0.002049476 |
| UCK1 | Glycosaminoglycan degra               | ACC | 0.068348794  |
| UCK1 | Glycosphingolipid biosyn <sub>1</sub> | ACC | 0.146343941  |
| UCK1 | Glycosphingolipid biosyn <sub>1</sub> | ACC | 0.242894435  |
| UCK1 | Glycosphingolipid biosyn <sub>1</sub> | ACC | 0.215549505  |
| UCK1 | Glycosylphosphatidylinos              | ACC | 0.067998662  |
| UCK1 | Glyoxylate and dicarboxy              | ACC | -0.075589166 |
| UCK1 | Granulocyte                           | ACC | -0.133246644 |
| UCK1 | Hedgehog_signaling                    | ACC | -0.16942436  |
| UCK1 | Histidine metabolism                  | ACC | -0.070656025 |
| UCK1 | Hypoxia                               | ACC | -0.167979117 |
| UCK1 | Il-17ralpha t cell                    | ACC | -0.204162916 |
| UCK1 | Il2_stat5_signaling                   | ACC | -0.207424563 |
| UCK1 | Il6_jak_stat3_signaling               | ACC | -0.221229915 |
| UCK1 | Immune_checkpoints_turr               | ACC | -0.127908187 |
| UCK1 | Immune_inhibition_cytok               | ACC | -0.110973094 |
| UCK1 | Inositol phosphate metabo             | ACC | -0.198865611 |
| UCK1 | Interleukin_6_signaling               | ACC | -0.461353877 |
| UCK1 | Jaeger_metastasis_up                  | ACC | -0.008240427 |
| UCK1 | Jain_nfkb_signaling                   | ACC | -0.172223895 |
| UCK1 | Kras_signaling_up                     | ACC | -0.275247455 |
| UCK1 | Linoleic acid metabolism              | ACC | 0.196372232  |
| UCK1 | Lipoic acid metabolism                | ACC | 0.089781355  |
| UCK1 | Lysine degradation                    | ACC | -0.056234456 |
| UCK1 | Lysosome                              | ACC | -0.153328884 |
| UCK1 | M1 macrophage                         | ACC | -0.193584725 |



|      |                             |     |              |
|------|-----------------------------|-----|--------------|
| UCK1 | M2 macrophage               | ACC | -0.220640055 |
| UCK1 | Mannose type o-glycan bi    | ACC | 0.222914542  |
| UCK1 | Mapk_signaling_pathway      | ACC | -0.341043155 |
| UCK1 | Mapk3_erk1_activation       | ACC | -0.468492779 |
| UCK1 | Marginal zone b cell        | ACC | -0.232986677 |
| UCK1 | Memory b cell               | ACC | -0.159083255 |
| UCK1 | Mesenchymal cell            | ACC | 0.001947557  |
| UCK1 | Mesenchymal stem cell       | ACC | -0.234508442 |
| UCK1 | Metabolism of xenobiotic    | ACC | 0.079221612  |
| UCK1 | Migrating cancer stem cel   | ACC | -0.296118407 |
| UCK1 | Mitotic_spindle             | ACC | -0.28552206  |
| UCK1 | Monocyte                    | ACC | -0.177048839 |
| UCK1 | Mtor_signaling_pathway      | ACC | -0.163440356 |
| UCK1 | Mtorc1_signaling            | ACC | -0.092387874 |
| UCK1 | Mucin type o-glycan biosy   | ACC | -0.30155319  |
| UCK1 | Myc_targets_v1              | ACC | 0.111844924  |
| UCK1 | Myeloid cell                | ACC | -0.207051716 |
| UCK1 | N-glycan biosynthesis       | ACC | 0.137822045  |
| UCK1 | Naive b cell                | ACC | -0.021639274 |
| UCK1 | Naive cd4+ t cell           | ACC | -0.191769549 |
| UCK1 | Naive cd8+ t cell           | ACC | -0.050624282 |
| UCK1 | Natural killer cell         | ACC | -0.161517327 |
| UCK1 | Natural killer t (nkt) cell | ACC | -0.152313156 |
| UCK1 | Natural regulatory t (treg) | ACC | -0.218594054 |
| UCK1 | Neomycin, kanamycin an      | ACC | -0.129038672 |
| UCK1 | Neutrophil                  | ACC | -0.177851491 |
| UCK1 | Nicotinate and nicotinami   | ACC | -0.26908627  |
| UCK1 | Nitrogen metabolism         | ACC | -0.497519707 |
| UCK1 | Nod_like_receptor_signal    | ACC | -0.362238348 |
| UCK1 | Notch_signaling             | ACC | -0.22286295  |
| UCK1 | One carbon pool by folate   | ACC | -0.010804586 |
| UCK1 | Other glycan degradation    | ACC | -0.058832826 |
| UCK1 | Other types of o-glycan b   | ACC | 0.141128494  |
| UCK1 | Oxidative phosphorylatio    | ACC | 0.216792699  |
| UCK1 | P53_pathway                 | ACC | -0.03480498  |
| UCK1 | P53_signaling_pathway       | ACC | -0.110014666 |
| UCK1 | Pantothenate and coa bios   | ACC | -0.202245607 |
| UCK1 | Pentose and glucuronate i   | ACC | -0.142594959 |
| UCK1 | Pentose phosphate pathwa    | ACC | -0.024362431 |
| UCK1 | Pericyte                    | ACC | -0.09425231  |
| UCK1 | Phenylalanine metabolism    | ACC | 0.114706578  |
| UCK1 | Phenylalanine, tyrosine ar  | ACC | 0.018625847  |
| UCK1 | Phosphonate and phosphir    | ACC | -0.119980515 |

|      |                            |     |              |
|------|----------------------------|-----|--------------|
| UCK1 | Pi3k_akt_activation        | ACC | -0.225238652 |
| UCK1 | Pi3k_akt_mtor_signaling    | ACC | -0.1976664   |
| UCK1 | Porphyrin and chlorophyl   | ACC | -0.026707848 |
| UCK1 | Primary bile acid biosynt  | ACC | -0.185156779 |
| UCK1 | Propanoate metabolism      | ACC | -0.188697711 |
| UCK1 | Purine metabolism          | ACC | 0.002012632  |
| UCK1 | Pyrimidine metabolism      | ACC | 0.087056119  |
| UCK1 | Pyruvate metabolism        | ACC | 0.044856334  |
| UCK1 | Regulation_of_autophagy    | ACC | -0.420109098 |
| UCK1 | Retinol metabolism         | ACC | -0.085563775 |
| UCK1 | Riboflavin metabolism      | ACC | 0.073190513  |
| UCK1 | Schmahl_pdgf_signaling     | ACC | -0.105397617 |
| UCK1 | Selenocompound metabol     | ACC | -0.04033282  |
| UCK1 | Signaling_by_hippo         | ACC | -0.252702494 |
| UCK1 | Sphingolipid metabolism    | ACC | -0.180703656 |
| UCK1 | Starch and sucrose metabo  | ACC | -0.14233814  |
| UCK1 | Steroid biosynthesis       | ACC | 0.093250859  |
| UCK1 | Steroid hormone biosynth   | ACC | 0.093393016  |
| UCK1 | Sulfur metabolism          | ACC | -0.049842742 |
| UCK1 | Synthesis and degradation  | ACC | -0.068691061 |
| UCK1 | T helper cell              | ACC | -0.197703473 |
| UCK1 | T helper1 (th1) cell       | ACC | -0.181645447 |
| UCK1 | T helper17 (th17) cell     | ACC | -0.108517482 |
| UCK1 | T helper2 (th2) cell       | ACC | -0.137653681 |
| UCK1 | T helper9 (th9) cell       | ACC | -0.090612141 |
| UCK1 | Taurine and hypotaurine r  | ACC | 0.036489675  |
| UCK1 | Terpenoid backbone biosy   | ACC | 0.127883491  |
| UCK1 | Tgf_beta_signaling_pathw   | ACC | -0.231235778 |
| UCK1 | Thiamine metabolism        | ACC | 0.26721044   |
| UCK1 | Tnfa_signaling_via_nfk     | ACC | -0.204419185 |
| UCK1 | Tryptophan metabolism      | ACC | -0.027023418 |
| UCK1 | Tumor endothelial cell     | ACC | 0.089148879  |
| UCK1 | Tyrosine metabolism        | ACC | -0.032644488 |
| UCK1 | Ubiquinone and other ter   | ACC | 0.148272704  |
| UCK1 | Valine, leucine and isoleu | ACC | 0.087408395  |
| UCK1 | Valine, leucine and isoleu | ACC | -0.061962321 |
| UCK1 | Vascular endothelial cell  | ACC | -0.189941671 |
| UCK1 | Vascular smooth muscle c   | ACC | -0.115068966 |
| UCK1 | Vegf_signaling_pathway     | ACC | -0.22616977  |
| UCK1 | Vitamin b6 metabolism      | ACC | 0.08457884   |
| UCK1 | Willert_wnt_signaling      | ACC | 0.185468794  |
| UCK1 | Wnt_beta_catenin_signali   | ACC | 0.088005369  |
| UCK2 | Abnormal plasma cell       | ACC | -0.255836917 |

|      |                                      |     |              |
|------|--------------------------------------|-----|--------------|
| UCK2 | Activated b cell                     | ACC | 0.139715385  |
| UCK2 | Activated cd4+ t cell                | ACC | 0.364196563  |
| UCK2 | Activated t cell                     | ACC | 0.428521476  |
| UCK2 | Alanine, aspartate and glu           | ACC | 0.006903263  |
| UCK2 | Alcala_apoptosis                     | ACC | 0.435569546  |
| UCK2 | Alpha-linolenic acid meta            | ACC | -0.315014898 |
| UCK2 | Amino sugar and nucleoti             | ACC | 0.127657996  |
| UCK2 | Ampk_pathway                         | ACC | -0.048443827 |
| UCK2 | Angiogenesis                         | ACC | 0.296855938  |
| UCK2 | Arachidonic acid metabol             | ACC | 0.083373163  |
| UCK2 | Arginine and proline metε            | ACC | -0.046586849 |
| UCK2 | Arginine biosynthesis                | ACC | 0.112050936  |
| UCK2 | Ascorbate and aldarate mε            | ACC | -0.250504416 |
| UCK2 | Atypical memory b cell               | ACC | 0.116148269  |
| UCK2 | Axl+siglec6+ dendritic ce            | ACC | 0.297501563  |
| UCK2 | B cell                               | ACC | 0.401521832  |
| UCK2 | B1 cell                              | ACC | 0.002591546  |
| UCK2 | Basal cell                           | ACC | 0.534079896  |
| UCK2 | Beta-alanine metabolism              | ACC | -0.157574635 |
| UCK2 | Biosynthesis of unsaturate           | ACC | -0.132602109 |
| UCK2 | Biotin metabolism                    | ACC | -0.129629008 |
| UCK2 | Butanoate metabolism                 | ACC | -0.328516207 |
| UCK2 | Caffeine metabolism                  | ACC | -0.00507719  |
| UCK2 | Cancer stem cell                     | ACC | 0.439228717  |
| UCK2 | Cancer stem-like cell                | ACC | 0.372903698  |
| UCK2 | Cd4+ cytotoxic t cell                | ACC | 0.396438437  |
| UCK2 | Cd4+ memory t cell                   | ACC | 0.064116598  |
| UCK2 | Cd4+ regulatory t cell               | ACC | 0.271485216  |
| UCK2 | Cd4+ t helper cell                   | ACC | 0.302718242  |
| UCK2 | Cd4+cd25+ regulatory t c             | ACC | 0.311234481  |
| UCK2 | Cd8+ cytotoxic t cell                | ACC | 0.399338877  |
| UCK2 | Cd8+ regulatory t cell               | ACC | 0.425832449  |
| UCK2 | Cell_cycle                           | ACC | 0.225504557  |
| UCK2 | Chandran_metastasis_top <sup>5</sup> | ACC | -0.195459409 |
| UCK2 | Citrate cycle (tca cycle)            | ACC | -0.15658919  |
| UCK2 | Cysteine and methionine r            | ACC | 0.021012119  |
| UCK2 | Cytokine induced killer cε           | ACC | -0.056578385 |
| UCK2 | D-arginine and d-ornithin            | ACC | -0.026068191 |
| UCK2 | D-glutamine and d-glutan             | ACC | -0.169629355 |
| UCK2 | Dendritic cell                       | ACC | 0.393536791  |
| UCK2 | Dna_repair                           | ACC | 0.24166146   |
| UCK2 | Dna_replication                      | ACC | 0.357412466  |
| UCK2 | Double-negative memory               | ACC | 0.149435494  |

|      |                                 |              |
|------|---------------------------------|--------------|
| UCK2 | Drug metabolism - cytochACC     | -0.131869175 |
| UCK2 | Drug metabolism - other (ACC    | 0.330605339  |
| UCK2 | E2f_targets ACC                 | 0.370032602  |
| UCK2 | Ecm_receptor_interaction ACC    | 0.348516588  |
| UCK2 | Effector cd4+ memory t (ACC     | 0.28597048   |
| UCK2 | Effector cd8+ memory t (ACC     | 0.427186571  |
| UCK2 | Effector memory t cell ACC      | 0.276701029  |
| UCK2 | Effector regulatory t (tregACC  | 0.325799021  |
| UCK2 | Elvidge_hif1a_targets_up ACC    | -0.035762068 |
| UCK2 | Endothelial cell ACC            | 0.513860306  |
| UCK2 | Eosinophil ACC                  | 0.373819163  |
| UCK2 | Ether lipid metabolism ACC      | -0.271315151 |
| UCK2 | Exhausted cd4+ t cell ACC       | 0.420503946  |
| UCK2 | Exhausted cd8+ t cell ACC       | 0.480019774  |
| UCK2 | Exhausted t cell ACC            | 0.331383304  |
| UCK2 | Fat cell (adipocyte) ACC        | -0.049215686 |
| UCK2 | Fatty acid biosynthesis ACC     | -0.113121267 |
| UCK2 | Fatty acid degradation ACC      | -0.30030658  |
| UCK2 | Fatty acid elongation ACC       | 0.010111132  |
| UCK2 | Fibroblast ACC                  | 0.345551395  |
| UCK2 | Folate biosynthesis ACC         | -0.120152701 |
| UCK2 | Follicular b cell ACC           | 0.230695353  |
| UCK2 | Follicular dendritic cell ACC   | 0.312650472  |
| UCK2 | Follicular helper (tfh) t ceACC | 0.346633917  |
| UCK2 | Follicular t cell ACC           | 0.335354332  |
| UCK2 | Foxp3+il-17+ t cell ACC         | 0.048185457  |
| UCK2 | Fructose and mannose meACC      | 0.074814833  |
| UCK2 | G2m_checkpoint ACC              | 0.360625396  |
| UCK2 | Galactose metabolism ACC        | 0.234704115  |
| UCK2 | Galie_tumor_stemness_geACC      | 0.042845614  |
| UCK2 | Glutathione metabolism ACC      | 0.270924967  |
| UCK2 | Glycerolipid metabolism ACC     | -0.054796385 |
| UCK2 | Glycerophospholipid metεACC     | -0.162454497 |
| UCK2 | Glycine, serine and threorACC   | -0.045509738 |
| UCK2 | Glycolysis / gluconeogeneACC    | -0.051262008 |
| UCK2 | Glycosaminoglycan biosy1ACC     | 0.277443217  |
| UCK2 | Glycosaminoglycan biosy1ACC     | -0.164640506 |
| UCK2 | Glycosaminoglycan biosy1ACC     | 0.322125752  |
| UCK2 | Glycosaminoglycan degraACC      | 0.151897711  |
| UCK2 | Glycosphingolipid biosyn1ACC    | -0.00867871  |
| UCK2 | Glycosphingolipid biosyn1ACC    | 0.088834468  |
| UCK2 | Glycosphingolipid biosyn1ACC    | 0.301126966  |
| UCK2 | Glycosylphosphatidylinos:ACC    | 0.009008966  |

|      |                             |     |              |
|------|-----------------------------|-----|--------------|
| UCK2 | Glyoxylate and dicarboxy    | ACC | -0.149943625 |
| UCK2 | Granulocyte                 | ACC | 0.397653764  |
| UCK2 | Hedgehog_signaling          | ACC | -0.176954396 |
| UCK2 | Histidine metabolism        | ACC | 0.037400666  |
| UCK2 | Hypoxia                     | ACC | 0.289952492  |
| UCK2 | Il-17alpha t cell           | ACC | 0.205831543  |
| UCK2 | Il2_stat5_signaling         | ACC | 0.522270007  |
| UCK2 | Il6_jak_stat3_signaling     | ACC | 0.452449983  |
| UCK2 | Immune_checkpoints_turr     | ACC | 0.334768199  |
| UCK2 | Immune_inhibition_cytok     | ACC | 0.496707867  |
| UCK2 | Inositol phosphate metabo   | ACC | -0.241209166 |
| UCK2 | Interleukin_6_signaling     | ACC | 0.285853478  |
| UCK2 | Jaeger_metastasis_up        | ACC | 0.239651565  |
| UCK2 | Jain_nfkb_signaling         | ACC | 0.263508734  |
| UCK2 | Kras_signaling_up           | ACC | 0.321953219  |
| UCK2 | Linoleic acid metabolism    | ACC | -0.308838735 |
| UCK2 | Lipoic acid metabolism      | ACC | -0.203741707 |
| UCK2 | Lysine degradation          | ACC | -0.124591504 |
| UCK2 | Lysosome                    | ACC | -0.042492617 |
| UCK2 | M1 macrophage               | ACC | 0.376775052  |
| UCK2 | M2 macrophage               | ACC | 0.320320513  |
| UCK2 | Mannose type o-glycan bi    | ACC | 0.160652198  |
| UCK2 | Mapk_signaling_pathway      | ACC | 0.060809638  |
| UCK2 | Mapk3_erk1_activation       | ACC | 0.094165567  |
| UCK2 | Marginal zone b cell        | ACC | 0.204933153  |
| UCK2 | Memory b cell               | ACC | 0.209838074  |
| UCK2 | Mesenchymal cell            | ACC | 0.397835042  |
| UCK2 | Mesenchymal stem cell       | ACC | 0.38959016   |
| UCK2 | Metabolism of xenobiotic    | ACC | 0.016903995  |
| UCK2 | Migrating cancer stem cel   | ACC | 0.565303207  |
| UCK2 | Mitotic_spindle             | ACC | 0.171020389  |
| UCK2 | Monocyte                    | ACC | 0.404756299  |
| UCK2 | Mtor_signaling_pathway      | ACC | -0.211122823 |
| UCK2 | Mtorc1_signaling            | ACC | 0.14396623   |
| UCK2 | Mucin type o-glycan biosy   | ACC | -0.113227857 |
| UCK2 | Myc_targets_v1              | ACC | 0.294016303  |
| UCK2 | Myeloid cell                | ACC | 0.360671383  |
| UCK2 | N-glycan biosynthesis       | ACC | 0.047062064  |
| UCK2 | Naive b cell                | ACC | 0.305916375  |
| UCK2 | Naive cd4+ t cell           | ACC | 0.142732347  |
| UCK2 | Naive cd8+ t cell           | ACC | 0.089028117  |
| UCK2 | Natural killer cell         | ACC | 0.362918526  |
| UCK2 | Natural killer t (nkt) cell | ACC | 0.493612173  |

|      |                             |     |              |
|------|-----------------------------|-----|--------------|
| UCK2 | Natural regulatory t (treg) | ACC | 0.139401461  |
| UCK2 | Neomycin, kanamycin and     | ACC | 0.230326325  |
| UCK2 | Neutrophil                  | ACC | 0.464219925  |
| UCK2 | Nicotinate and nicotinami   | ACC | 0.129853684  |
| UCK2 | Nitrogen metabolism         | ACC | 0.036572102  |
| UCK2 | Nod_like_receptor_signal    | ACC | 0.411409284  |
| UCK2 | Notch_signaling             | ACC | 0.20563698   |
| UCK2 | One carbon pool by folate   | ACC | 0.403289459  |
| UCK2 | Other glycan degradation    | ACC | -0.008019172 |
| UCK2 | Other types of o-glycan b   | ACC | 0.222829775  |
| UCK2 | Oxidative phosphorylatio    | ACC | -0.117586025 |
| UCK2 | P53_pathway                 | ACC | 0.179919235  |
| UCK2 | P53_signaling_pathway       | ACC | 0.221029243  |
| UCK2 | Pantothenate and coa bios   | ACC | 0.076285794  |
| UCK2 | Pentose and glucuronate in  | ACC | -0.02768053  |
| UCK2 | Pentose phosphate pathwa    | ACC | 0.092191016  |
| UCK2 | Pericyte                    | ACC | 0.299947906  |
| UCK2 | Phenylalanine metabolism    | ACC | -0.104354468 |
| UCK2 | Phenylalanine, tyrosine ar  | ACC | -0.191143477 |
| UCK2 | Phosphonate and phosphir    | ACC | -0.200191305 |
| UCK2 | Pi3k_akt_activation         | ACC | -0.08545581  |
| UCK2 | Pi3k_akt_mtor_signaling     | ACC | 0.18860533   |
| UCK2 | Porphyrin and chlorophyl    | ACC | -0.196713117 |
| UCK2 | Primary bile acid biosynt   | ACC | -0.283743205 |
| UCK2 | Propanoate metabolism       | ACC | -0.293744548 |
| UCK2 | Purine metabolism           | ACC | 0.409796215  |
| UCK2 | Pyrimidine metabolism       | ACC | 0.467281395  |
| UCK2 | Pyruvate metabolism         | ACC | -0.318380864 |
| UCK2 | Regulation_of_autophagy     | ACC | -0.408703321 |
| UCK2 | Retinol metabolism          | ACC | -0.186235353 |
| UCK2 | Riboflavin metabolism       | ACC | 0.249632338  |
| UCK2 | Schmahl_pdgf_signaling      | ACC | 0.16505149   |
| UCK2 | Selenocompound metabol      | ACC | -0.260564372 |
| UCK2 | Signaling_by_hippo          | ACC | 0.077637317  |
| UCK2 | Sphingolipid metabolism     | ACC | -0.103414816 |
| UCK2 | Starch and sucrose metabo   | ACC | -0.031416369 |
| UCK2 | Steroid biosynthesis        | ACC | -0.285984005 |
| UCK2 | Steroid hormone biosynth    | ACC | -0.277017269 |
| UCK2 | Sulfur metabolism           | ACC | -0.100312804 |
| UCK2 | Synthesis and degradation   | ACC | -0.241886025 |
| UCK2 | T helper cell               | ACC | 0.292531189  |
| UCK2 | T helper1 (th1) cell        | ACC | 0.348929678  |
| UCK2 | T helper17 (th17) cell      | ACC | 0.403124746  |

|       |                            |     |              |
|-------|----------------------------|-----|--------------|
| UCK2  | T helper2 (th2) cell       | ACC | 0.402723371  |
| UCK2  | T helper9 (th9) cell       | ACC | 0.362022962  |
| UCK2  | Taurine and hypotaurine r  | ACC | -0.274545364 |
| UCK2  | Terpenoid backbone biosy   | ACC | -0.140926713 |
| UCK2  | Tgf_beta_signaling_pathw   | ACC | 0.098638018  |
| UCK2  | Thiamine metabolism        | ACC | -0.127952533 |
| UCK2  | Tnfa_signaling_via_nfkB    | ACC | 0.550076085  |
| UCK2  | Tryptophan metabolism      | ACC | -0.138421086 |
| UCK2  | Tumor endothelial cell     | ACC | 0.341888827  |
| UCK2  | Tyrosine metabolism        | ACC | -0.065859222 |
| UCK2  | Ubiquinone and other ter   | ACC | -0.136663596 |
| UCK2  | Valine, leucine and isoleu | ACC | 0.199949773  |
| UCK2  | Valine, leucine and isoleu | ACC | -0.364880388 |
| UCK2  | Vascular endothelial cell  | ACC | 0.329150178  |
| UCK2  | Vascular smooth muscle c   | ACC | 0.17398509   |
| UCK2  | Vegf_signaling_pathway     | ACC | 0.092016349  |
| UCK2  | Vitamin b6 metabolism      | ACC | 0.031282899  |
| UCK2  | Willert_wnt_signaling      | ACC | 0.01385381   |
| UCK2  | Wnt_beta_catenin_signali   | ACC | 0.054102847  |
| UCKL1 | Abnormal plasma cell       | ACC | 0.02990623   |
| UCKL1 | Activated b cell           | ACC | -0.039899555 |
| UCKL1 | Activated cd4+ t cell      | ACC | -0.028864797 |
| UCKL1 | Activated t cell           | ACC | -0.003482896 |
| UCKL1 | Alanine, aspartate and glu | ACC | 0.164256755  |
| UCKL1 | Alcala_apoptosis           | ACC | 0.118822746  |
| UCKL1 | Alpha-linolenic acid meta  | ACC | -0.072192868 |
| UCKL1 | Amino sugar and nucleoti   | ACC | -0.165044152 |
| UCKL1 | Ampk_pathway               | ACC | 0.221519718  |
| UCKL1 | Angiogenesis               | ACC | -0.127442859 |
| UCKL1 | Arachidonic acid metabol   | ACC | -0.125705697 |
| UCKL1 | Arginine and proline metæ  | ACC | -0.187773361 |
| UCKL1 | Arginine biosynthesis      | ACC | 0.038314251  |
| UCKL1 | Ascorbate and aldarate mε  | ACC | -0.221753798 |
| UCKL1 | Atypical memory b cell     | ACC | -0.03410511  |
| UCKL1 | Axl+siglec6+ dendritic ce  | ACC | -0.072608109 |
| UCKL1 | B cell                     | ACC | 0.023600114  |
| UCKL1 | B1 cell                    | ACC | -0.013952845 |
| UCKL1 | Basal cell                 | ACC | -0.046128525 |
| UCKL1 | Beta-alanine metabolism    | ACC | -0.311428121 |
| UCKL1 | Biosynthesis of unsaturate | ACC | 0.070170126  |
| UCKL1 | Biotin metabolism          | ACC | -0.049107719 |
| UCKL1 | Butanoate metabolism       | ACC | -0.049932095 |
| UCKL1 | Caffeine metabolism        | ACC | -0.222445229 |

|       |                             |     |              |
|-------|-----------------------------|-----|--------------|
| UCKL1 | Cancer stem cell            | ACC | -0.034277307 |
| UCKL1 | Cancer stem-like cell       | ACC | -0.026839319 |
| UCKL1 | Cd4+ cytotoxic t cell       | ACC | -0.089585315 |
| UCKL1 | Cd4+ memory t cell          | ACC | -0.197308657 |
| UCKL1 | Cd4+ regulatory t cell      | ACC | -0.027330029 |
| UCKL1 | Cd4+ t helper cell          | ACC | -0.014933679 |
| UCKL1 | Cd4+cd25+ regulatory t c    | ACC | -0.018469578 |
| UCKL1 | Cd8+ cytotoxic t cell       | ACC | -0.04678295  |
| UCKL1 | Cd8+ regulatory t cell      | ACC | 0.003878212  |
| UCKL1 | Cell_cycle                  | ACC | 0.239873514  |
| UCKL1 | Chandran_metastasis_top5    | ACC | 0.060589233  |
| UCKL1 | Citrate cycle (tca cycle)   | ACC | 0.002551389  |
| UCKL1 | Cysteine and methionine r   | ACC | 0.04660307   |
| UCKL1 | Cytokine induced killer c   | ACC | -0.020600904 |
| UCKL1 | D-arginine and d-ornithin   | ACC | -0.048822977 |
| UCKL1 | D-glutamine and d-glutan    | ACC | 0.099871026  |
| UCKL1 | Dendritic cell              | ACC | -0.011986884 |
| UCKL1 | Dna_repair                  | ACC | 0.180922353  |
| UCKL1 | Dna_replication             | ACC | 0.174527675  |
| UCKL1 | Double-negative memory      | ACC | -0.056262143 |
| UCKL1 | Drug metabolism - cytoch    | ACC | -0.198397465 |
| UCKL1 | Drug metabolism - other     | ACC | 0.009057877  |
| UCKL1 | E2f_targets                 | ACC | 0.177519993  |
| UCKL1 | Ecm_receptor_interaction    | ACC | 0.029336727  |
| UCKL1 | Effector cd4+ memory t (    | ACC | -0.037028818 |
| UCKL1 | Effector cd8+ memory t (    | ACC | -0.074045241 |
| UCKL1 | Effector memory t cell      | ACC | -0.115470977 |
| UCKL1 | Effector regulatory t (treg | ACC | -0.010252105 |
| UCKL1 | Elvidge_hif1a_targets_up    | ACC | -0.078419319 |
| UCKL1 | Endothelial cell            | ACC | 0.037802621  |
| UCKL1 | Eosinophil                  | ACC | -0.027152409 |
| UCKL1 | Ether lipid metabolism      | ACC | -0.138166389 |
| UCKL1 | Exhausted cd4+ t cell       | ACC | -0.040959783 |
| UCKL1 | Exhausted cd8+ t cell       | ACC | -0.070181241 |
| UCKL1 | Exhausted t cell            | ACC | -0.062296006 |
| UCKL1 | Fat cell (adipocyte)        | ACC | -0.055900295 |
| UCKL1 | Fatty acid biosynthesis     | ACC | -0.171084307 |
| UCKL1 | Fatty acid degradation      | ACC | -0.075474596 |
| UCKL1 | Fatty acid elongation       | ACC | 0.074161356  |
| UCKL1 | Fibroblast                  | ACC | -0.011056965 |
| UCKL1 | Folate biosynthesis         | ACC | -0.135462795 |
| UCKL1 | Follicular b cell           | ACC | -0.104292794 |
| UCKL1 | Follicular dendritic cell   | ACC | -0.042134482 |



|       |                              |     |              |
|-------|------------------------------|-----|--------------|
| UCKL1 | Follicular helper (tfh) t ce | ACC | -0.052723119 |
| UCKL1 | Follicular t cell            | ACC | 0.09365334   |
| UCKL1 | Foxp3+il-17+ t cell          | ACC | -0.106961081 |
| UCKL1 | Fructose and mannose me      | ACC | -0.162140014 |
| UCKL1 | G2m_checkpoint               | ACC | 0.158670252  |
| UCKL1 | Galactose metabolism         | ACC | -0.059099841 |
| UCKL1 | Galie_tumor_stemness_ge      | ACC | -0.152169854 |
| UCKL1 | Glutathione metabolism       | ACC | 0.012992557  |
| UCKL1 | Glycerolipid metabolism      | ACC | -0.056043752 |
| UCKL1 | Glycerophospholipid metæ     | ACC | 0.089076682  |
| UCKL1 | Glycine, serine and threor   | ACC | -0.238135469 |
| UCKL1 | Glycolysis / gluconeogene    | ACC | -0.14071007  |
| UCKL1 | Glycosaminoglycan biosy1     | ACC | -0.122071487 |
| UCKL1 | Glycosaminoglycan biosy1     | ACC | -0.133789104 |
| UCKL1 | Glycosaminoglycan biosy1     | ACC | -0.135353771 |
| UCKL1 | Glycosaminoglycan degra      | ACC | -0.1000528   |
| UCKL1 | Glycosphingolipid biosyn1    | ACC | -0.171187115 |
| UCKL1 | Glycosphingolipid biosyn1    | ACC | -0.049156615 |
| UCKL1 | Glycosphingolipid biosyn1    | ACC | -0.005276734 |
| UCKL1 | Glycosylphosphatidylinos:    | ACC | -0.036648271 |
| UCKL1 | Glyoxylate and dicarboxy     | ACC | 0.101195758  |
| UCKL1 | Granulocyte                  | ACC | 0.03602276   |
| UCKL1 | Hedgehog_signaling           | ACC | -0.187403269 |
| UCKL1 | Histidine metabolism         | ACC | -0.355147833 |
| UCKL1 | Hypoxia                      | ACC | -0.098775487 |
| UCKL1 | Il-17ralpha t cell           | ACC | -0.140635566 |
| UCKL1 | Il2_stat5_signaling          | ACC | -0.104902099 |
| UCKL1 | Il6_jak_stat3_signaling      | ACC | -0.11413884  |
| UCKL1 | Immune_checkpoints_tur       | ACC | -0.1566395   |
| UCKL1 | Immune_inhibition_cytok      | ACC | -0.154744557 |
| UCKL1 | Inositol phosphate metabo    | ACC | -0.111328722 |
| UCKL1 | Interleukin_6_signaling      | ACC | -0.085905283 |
| UCKL1 | Jaeger_metastasis_up         | ACC | 0.18780591   |
| UCKL1 | Jain_nfkb_signaling          | ACC | 0.158117789  |
| UCKL1 | Kras_signaling_up            | ACC | -0.226587452 |
| UCKL1 | Linoleic acid metabolism     | ACC | -0.197874587 |
| UCKL1 | Lipoic acid metabolism       | ACC | -0.081413419 |
| UCKL1 | Lysine degradation           | ACC | -0.128891986 |
| UCKL1 | Lysosome                     | ACC | -0.181628799 |
| UCKL1 | M1 macrophage                | ACC | -0.032095927 |
| UCKL1 | M2 macrophage                | ACC | -0.029817201 |
| UCKL1 | Mannose type o-glycan bi     | ACC | 0.163974049  |
| UCKL1 | Mapk_signaling_pathway       | ACC | -0.101973199 |

|       |                             |     |              |
|-------|-----------------------------|-----|--------------|
| UCKL1 | Mapk3_erk1_activation       | ACC | -0.099018655 |
| UCKL1 | Marginal zone b cell        | ACC | -0.117045369 |
| UCKL1 | Memory b cell               | ACC | -0.063260212 |
| UCKL1 | Mesenchymal cell            | ACC | 0.02016631   |
| UCKL1 | Mesenchymal stem cell       | ACC | -0.065866741 |
| UCKL1 | Metabolism of xenobiotic    | ACC | -0.095849259 |
| UCKL1 | Migrating cancer stem cel   | ACC | 0.16149964   |
| UCKL1 | Mitotic_spindle             | ACC | 0.066795823  |
| UCKL1 | Monocyte                    | ACC | -0.062871828 |
| UCKL1 | Mtor_signaling_pathway      | ACC | -0.078042162 |
| UCKL1 | Mtorc1_signaling            | ACC | 0.082165379  |
| UCKL1 | Mucin type o-glycan bios    | ACC | -0.444749738 |
| UCKL1 | Myc_targets_v1              | ACC | 0.196517041  |
| UCKL1 | Myeloid cell                | ACC | 0.003982533  |
| UCKL1 | N-glycan biosynthesis       | ACC | -0.022140003 |
| UCKL1 | Naive b cell                | ACC | -0.207013143 |
| UCKL1 | Naive cd4+ t cell           | ACC | -0.123740687 |
| UCKL1 | Naive cd8+ t cell           | ACC | -0.012905744 |
| UCKL1 | Natural killer cell         | ACC | -0.030243362 |
| UCKL1 | Natural killer t (nkt) cell | ACC | 0.173146439  |
| UCKL1 | Natural regulatory t (treg) | ACC | -0.107337401 |
| UCKL1 | Neomycin, kanamycin an      | ACC | -0.057166711 |
| UCKL1 | Neutrophil                  | ACC | -0.039001244 |
| UCKL1 | Nicotinate and nicotinami   | ACC | -0.193069156 |
| UCKL1 | Nitrogen metabolism         | ACC | -0.07608348  |
| UCKL1 | Nod_like_receptor_signal    | ACC | -0.129831633 |
| UCKL1 | Notch_signaling             | ACC | -0.220437969 |
| UCKL1 | One carbon pool by folate   | ACC | 0.143565172  |
| UCKL1 | Other glycan degradation    | ACC | -0.118508462 |
| UCKL1 | Other types of o-glycan b   | ACC | 0.148517553  |
| UCKL1 | Oxidative phosphorylatio    | ACC | 0.036410879  |
| UCKL1 | P53_pathway                 | ACC | -0.175248251 |
| UCKL1 | P53_signaling_pathway       | ACC | 0.130942087  |
| UCKL1 | Pantothenate and coa bios   | ACC | 0.048025919  |
| UCKL1 | Pentose and glucuronate i   | ACC | -0.136024872 |
| UCKL1 | Pentose phosphate pathwa    | ACC | -0.067105766 |
| UCKL1 | Pericyte                    | ACC | -0.034893581 |
| UCKL1 | Phenylalanine metabolism    | ACC | -0.256828694 |
| UCKL1 | Phenylalanine, tyrosine ar  | ACC | -0.022536884 |
| UCKL1 | Phosphonate and phosphir    | ACC | -0.075870837 |
| UCKL1 | Pi3k_akt_activation         | ACC | -0.142775236 |
| UCKL1 | Pi3k_akt_mtor_signaling     | ACC | 0.063107084  |
| UCKL1 | Porphyryn and chlorophyl    | ACC | -0.205057642 |

|       |                            |     |              |
|-------|----------------------------|-----|--------------|
| UCKL1 | Primary bile acid biosynt  | ACC | -0.198051128 |
| UCKL1 | Propanoate metabolism      | ACC | 0.032678006  |
| UCKL1 | Purine metabolism          | ACC | 0.076925217  |
| UCKL1 | Pyrimidine metabolism      | ACC | 0.254684746  |
| UCKL1 | Pyruvate metabolism        | ACC | 0.067325762  |
| UCKL1 | Regulation_of_autophagy    | ACC | -0.092092977 |
| UCKL1 | Retinol metabolism         | ACC | -0.332341738 |
| UCKL1 | Riboflavin metabolism      | ACC | -0.048331305 |
| UCKL1 | Schmahl_pdgf_signaling     | ACC | -0.200573215 |
| UCKL1 | Selenocompound metabol     | ACC | -0.093092762 |
| UCKL1 | Signaling_by_hippo         | ACC | 0.019954538  |
| UCKL1 | Sphingolipid metabolism    | ACC | -0.21485776  |
| UCKL1 | Starch and sucrose metabo  | ACC | -0.083392901 |
| UCKL1 | Steroid biosynthesis       | ACC | 0.124684489  |
| UCKL1 | Steroid hormone biosynth   | ACC | -0.178894258 |
| UCKL1 | Sulfur metabolism          | ACC | -0.142042602 |
| UCKL1 | Synthesis and degradation  | ACC | -0.07109922  |
| UCKL1 | T helper cell              | ACC | -0.103782497 |
| UCKL1 | T helper1 (th1) cell       | ACC | -0.043774187 |
| UCKL1 | T helper17 (th17) cell     | ACC | -0.097066265 |
| UCKL1 | T helper2 (th2) cell       | ACC | -0.111470998 |
| UCKL1 | T helper9 (th9) cell       | ACC | -0.005044036 |
| UCKL1 | Taurine and hypotaurine r  | ACC | 0.109680436  |
| UCKL1 | Terpenoid backbone biosy   | ACC | 0.053557434  |
| UCKL1 | Tgf_beta_signaling_pathw   | ACC | -0.055067206 |
| UCKL1 | Thiamine metabolism        | ACC | -0.094420455 |
| UCKL1 | Tnfa_signaling_via_nfkb    | ACC | -0.121703296 |
| UCKL1 | Tryptophan metabolism      | ACC | -0.141327635 |
| UCKL1 | Tumor endothelial cell     | ACC | -0.060948092 |
| UCKL1 | Tyrosine metabolism        | ACC | -0.320033803 |
| UCKL1 | Ubiquinone and other terp  | ACC | -0.115376672 |
| UCKL1 | Valine, leucine and isoleu | ACC | -0.068768085 |
| UCKL1 | Valine, leucine and isoleu | ACC | -0.006155838 |
| UCKL1 | Vascular endothelial cell  | ACC | 0.081034206  |
| UCKL1 | Vascular smooth muscle c   | ACC | -0.084570697 |
| UCKL1 | Vegf_signaling_pathway     | ACC | -0.167959819 |
| UCKL1 | Vitamin b6 metabolism      | ACC | -0.015797671 |
| UCKL1 | Willert_wnt_signaling      | ACC | 0.069968013  |
| UCKL1 | Wnt_beta_catenin_signali   | ACC | 0.189713668  |
| UPP1  | Abnormal plasma cell       | ACC | -0.086847231 |
| UPP1  | Activated b cell           | ACC | 0.23299951   |
| UPP1  | Activated cd4+ t cell      | ACC | 0.270357638  |
| UPP1  | Activated t cell           | ACC | 0.233429172  |

|      |                            |     |              |
|------|----------------------------|-----|--------------|
| UPP1 | Alanine, aspartate and glu | ACC | 0.088669973  |
| UPP1 | Alcala_apoptosis           | ACC | 0.251829828  |
| UPP1 | Alpha-linolenic acid meta  | ACC | -0.050393427 |
| UPP1 | Amino sugar and nucleoti   | ACC | 0.318899854  |
| UPP1 | Ampk_pathway               | ACC | -0.132362229 |
| UPP1 | Angiogenesis               | ACC | 0.154128824  |
| UPP1 | Arachidonic acid metabol   | ACC | 0.207741783  |
| UPP1 | Arginine and proline metæ  | ACC | 0.099543014  |
| UPP1 | Arginine biosynthesis      | ACC | 0.056772924  |
| UPP1 | Ascorbate and aldarate mε  | ACC | -0.077394938 |
| UPP1 | Atypical memory b cell     | ACC | 0.15144163   |
| UPP1 | Axl+siglec6+ dendritic ce  | ACC | 0.208036997  |
| UPP1 | B cell                     | ACC | 0.348049246  |
| UPP1 | B1 cell                    | ACC | 0.201095691  |
| UPP1 | Basal cell                 | ACC | 0.267698727  |
| UPP1 | Beta-alanine metabolism    | ACC | -0.155313648 |
| UPP1 | Biosynthesis of unsaturate | ACC | -0.273413643 |
| UPP1 | Biotin metabolism          | ACC | -0.086623606 |
| UPP1 | Butanoate metabolism       | ACC | -0.064178615 |
| UPP1 | Caffeine metabolism        | ACC | -0.159670082 |
| UPP1 | Cancer stem cell           | ACC | 0.285994409  |
| UPP1 | Cancer stem-like cell      | ACC | 0.140133433  |
| UPP1 | Cd4+ cytotoxic t cell      | ACC | 0.229728106  |
| UPP1 | Cd4+ memory t cell         | ACC | 0.087036551  |
| UPP1 | Cd4+ regulatory t cell     | ACC | 0.186689669  |
| UPP1 | Cd4+ t helper cell         | ACC | 0.242205573  |
| UPP1 | Cd4+cd25+ regulatory t c   | ACC | 0.237419908  |
| UPP1 | Cd8+ cytotoxic t cell      | ACC | 0.161987188  |
| UPP1 | Cd8+ regulatory t cell     | ACC | 0.265729693  |
| UPP1 | Cell_cycle                 | ACC | 0.084459887  |
| UPP1 | Chandran_metastasis_topε   | ACC | -0.080588883 |
| UPP1 | Citrate cycle (tca cycle)  | ACC | 0.148829305  |
| UPP1 | Cysteine and methionine r  | ACC | 0.172608407  |
| UPP1 | Cytokine induced killer cε | ACC | 0.104456533  |
| UPP1 | D-arginine and d-ornithin  | ACC | -0.019733457 |
| UPP1 | D-glutamine and d-glutan   | ACC | -0.239918607 |
| UPP1 | Dendritic cell             | ACC | 0.277795     |
| UPP1 | Dna_repair                 | ACC | 0.060844587  |
| UPP1 | Dna_replication            | ACC | 0.188581371  |
| UPP1 | Double-negative memory     | ACC | 0.059568847  |
| UPP1 | Drug metabolism - cytoch   | ACC | -0.040339263 |
| UPP1 | Drug metabolism - other ε  | ACC | 0.008422949  |
| UPP1 | E2f_targets                | ACC | 0.124614678  |

|      |                                    |              |
|------|------------------------------------|--------------|
| UPP1 | Ecm_receptor_interaction ACC       | 0.153719829  |
| UPP1 | Effector cd4+ memory t ( ACC       | 0.258136237  |
| UPP1 | Effector cd8+ memory t ( ACC       | 0.346833398  |
| UPP1 | Effector memory t cell ACC         | 0.232215848  |
| UPP1 | Effector regulatory t (treg ACC    | 0.246641106  |
| UPP1 | Elvidge_hif1a_targets_up ACC       | 0.166263233  |
| UPP1 | Endothelial cell ACC               | 0.170603585  |
| UPP1 | Eosinophil ACC                     | 0.309623882  |
| UPP1 | Ether lipid metabolism ACC         | -0.092615921 |
| UPP1 | Exhausted cd4+ t cell ACC          | 0.275587225  |
| UPP1 | Exhausted cd8+ t cell ACC          | 0.328816247  |
| UPP1 | Exhausted t cell ACC               | 0.243196941  |
| UPP1 | Fat cell (adipocyte) ACC           | 0.069753622  |
| UPP1 | Fatty acid biosynthesis ACC        | 0.159467364  |
| UPP1 | Fatty acid degradation ACC         | -0.180913483 |
| UPP1 | Fatty acid elongation ACC          | -0.183299176 |
| UPP1 | Fibroblast ACC                     | 0.208207987  |
| UPP1 | Folate biosynthesis ACC            | 0.081962169  |
| UPP1 | Follicular b cell ACC              | 0.21006529   |
| UPP1 | Follicular dendritic cell ACC      | 0.0290291    |
| UPP1 | Follicular helper (tfh) t cell ACC | 0.285676625  |
| UPP1 | Follicular t cell ACC              | 0.311589529  |
| UPP1 | Foxp3+il-17+ t cell ACC            | -0.221058349 |
| UPP1 | Fructose and mannose me ACC        | 0.27327988   |
| UPP1 | G2m_checkpoint ACC                 | 0.082098326  |
| UPP1 | Galactose metabolism ACC           | 0.10091982   |
| UPP1 | Galie_tumor_stemness_ge ACC        | -0.102102582 |
| UPP1 | Glutathione metabolism ACC         | 0.176513369  |
| UPP1 | Glycerolipid metabolism ACC        | 0.053206021  |
| UPP1 | Glycerophospholipid metε ACC       | -0.16139633  |
| UPP1 | Glycine, serine and threor ACC     | 0.232208854  |
| UPP1 | Glycolysis / gluconeogene ACC      | 0.093066416  |
| UPP1 | Glycosaminoglycan biosy1 ACC       | 0.011809729  |
| UPP1 | Glycosaminoglycan biosy1 ACC       | -0.155967418 |
| UPP1 | Glycosaminoglycan biosy1 ACC       | 0.093332699  |
| UPP1 | Glycosaminoglycan degra ACC        | 0.33493196   |
| UPP1 | Glycosphingolipid biosyn1 ACC      | 0.036312639  |
| UPP1 | Glycosphingolipid biosyn1 ACC      | 0.224480861  |
| UPP1 | Glycosphingolipid biosyn1 ACC      | -0.038891848 |
| UPP1 | Glycosylphosphatidylinos: ACC      | -0.245794921 |
| UPP1 | Glyoxylate and dicarboxy ACC       | 0.158094122  |
| UPP1 | Granulocyte ACC                    | 0.318409537  |
| UPP1 | Hedgehog_signaling ACC             | -0.017041634 |

|      |                             |     |              |
|------|-----------------------------|-----|--------------|
| UPP1 | Histidine metabolism        | ACC | -0.001093987 |
| UPP1 | Hypoxia                     | ACC | 0.216559611  |
| UPP1 | Il-17alpha t cell           | ACC | 0.165621279  |
| UPP1 | Il2_stat5_signaling         | ACC | 0.198381427  |
| UPP1 | Il6_jak_stat3_signaling     | ACC | 0.293933662  |
| UPP1 | Immune_checkpoints_tur      | ACC | 0.371475017  |
| UPP1 | Immune_inhibition_cytok     | ACC | 0.283910311  |
| UPP1 | Inositol phosphate metabo   | ACC | -0.047111703 |
| UPP1 | Interleukin_6_signaling     | ACC | 0.255759105  |
| UPP1 | Jaeger_metastasis_up        | ACC | 0.160163618  |
| UPP1 | Jain_nfkb_signaling         | ACC | 0.225014005  |
| UPP1 | Kras_signaling_up           | ACC | 0.312936192  |
| UPP1 | Linoleic acid metabolism    | ACC | 0.022886835  |
| UPP1 | Lipoic acid metabolism      | ACC | -0.143508309 |
| UPP1 | Lysine degradation          | ACC | -0.142898631 |
| UPP1 | Lysosome                    | ACC | 0.224808227  |
| UPP1 | M1 macrophage               | ACC | 0.320907966  |
| UPP1 | M2 macrophage               | ACC | 0.256439668  |
| UPP1 | Mannose type o-glycan bi    | ACC | -0.025439569 |
| UPP1 | Mapk_signaling_pathway      | ACC | 0.171264392  |
| UPP1 | Mapk3_erk1_activation       | ACC | 0.163720394  |
| UPP1 | Marginal zone b cell        | ACC | 0.160422051  |
| UPP1 | Memory b cell               | ACC | 0.20619407   |
| UPP1 | Mesenchymal cell            | ACC | 0.063659351  |
| UPP1 | Mesenchymal stem cell       | ACC | 0.271110806  |
| UPP1 | Metabolism of xenobiotic    | ACC | -0.01158839  |
| UPP1 | Migrating cancer stem cel   | ACC | 0.207021544  |
| UPP1 | Mitotic_spindle             | ACC | -0.047098696 |
| UPP1 | Monocyte                    | ACC | 0.325987736  |
| UPP1 | Mtor_signaling_pathway      | ACC | 0.011750508  |
| UPP1 | Mtorc1_signaling            | ACC | 0.242408093  |
| UPP1 | Mucin type o-glycan biosy   | ACC | 0.116661625  |
| UPP1 | Myc_targets_v1              | ACC | 0.141373116  |
| UPP1 | Myeloid cell                | ACC | 0.245098135  |
| UPP1 | N-glycan biosynthesis       | ACC | 0.036730719  |
| UPP1 | Naive b cell                | ACC | 0.025292357  |
| UPP1 | Naive cd4+ t cell           | ACC | 0.146717848  |
| UPP1 | Naive cd8+ t cell           | ACC | 0.087270014  |
| UPP1 | Natural killer cell         | ACC | 0.254159811  |
| UPP1 | Natural killer t (nkt) cell | ACC | 0.295768683  |
| UPP1 | Natural regulatory t (treg) | ACC | 0.184045481  |
| UPP1 | Neomycin, kanamycin an      | ACC | 0.280182823  |
| UPP1 | Neutrophil                  | ACC | 0.354401258  |

|      |                                 |              |
|------|---------------------------------|--------------|
| UPP1 | Nicotinate and nicotinami ACC   | 0.200914486  |
| UPP1 | Nitrogen metabolism ACC         | -0.088938019 |
| UPP1 | Nod_like_receptor_signal: ACC   | 0.146665214  |
| UPP1 | Notch_signaling ACC             | 0.125127834  |
| UPP1 | One carbon pool by folate ACC   | 0.143166597  |
| UPP1 | Other glycan degradation ACC    | 0.13043573   |
| UPP1 | Other types of o-glycan b: ACC  | 0.080082829  |
| UPP1 | Oxidative phosphorylatior ACC   | 0.158855336  |
| UPP1 | P53_pathway ACC                 | 0.281658656  |
| UPP1 | P53_signaling_pathway ACC       | -0.013513546 |
| UPP1 | Pantothenate and coa bios ACC   | 0.12798685   |
| UPP1 | Pentose and glucuronate in ACC  | 0.169589196  |
| UPP1 | Pentose phosphate pathwa ACC    | 0.148313812  |
| UPP1 | Pericyte ACC                    | 0.295488523  |
| UPP1 | Phenylalanine metabolism ACC    | 0.134002608  |
| UPP1 | Phenylalanine, tyrosine ar ACC  | 0.337451768  |
| UPP1 | Phosphonate and phosphir ACC    | 0.022769414  |
| UPP1 | Pi3k_akt_activation ACC         | 0.00034901   |
| UPP1 | Pi3k_akt_mtor_signaling ACC     | 0.093791307  |
| UPP1 | Porphyrin and chlorophyl ACC    | 0.14944004   |
| UPP1 | Primary bile acid biosyntfl ACC | -0.066800663 |
| UPP1 | Propanoate metabolism ACC       | -0.14271893  |
| UPP1 | Purine metabolism ACC           | 0.159027233  |
| UPP1 | Pyrimidine metabolism ACC       | 0.185241563  |
| UPP1 | Pyruvate metabolism ACC         | -0.071266789 |
| UPP1 | Regulation_of_autophagy ACC     | 0.04075023   |
| UPP1 | Retinol metabolism ACC          | -0.056731045 |
| UPP1 | Riboflavin metabolism ACC       | 0.099863555  |
| UPP1 | Schmahl_pdgf_signaling ACC      | -0.007500687 |
| UPP1 | Selenocompound metabol ACC      | -0.097039479 |
| UPP1 | Signaling_by_hippo ACC          | -0.311180691 |
| UPP1 | Sphingolipid metabolism ACC     | 0.134846938  |
| UPP1 | Starch and sucrose metabo ACC   | 0.138842215  |
| UPP1 | Steroid biosynthesis ACC        | -0.01383691  |
| UPP1 | Steroid hormone biosynth ACC    | -0.097340631 |
| UPP1 | Sulfur metabolism ACC           | -0.153441351 |
| UPP1 | Synthesis and degradation ACC   | 0.050612654  |
| UPP1 | T helper cell ACC               | 0.278491454  |
| UPP1 | T helper1 (th1) cell ACC        | 0.239126791  |
| UPP1 | T helper17 (th17) cell ACC      | 0.304836926  |
| UPP1 | T helper2 (th2) cell ACC        | 0.232436366  |
| UPP1 | T helper9 (th9) cell ACC        | 0.218692671  |
| UPP1 | Taurine and hypotaurine r ACC   | -0.006851897 |

|      |                            |     |              |
|------|----------------------------|-----|--------------|
| UPP1 | Terpenoid backbone biosy   | ACC | 0.009737634  |
| UPP1 | Tgf_beta_signaling_pathw   | ACC | -0.169424645 |
| UPP1 | Thiamine metabolism        | ACC | 0.082831363  |
| UPP1 | Tnfa_signaling_via_nfk     | ACC | 0.284461429  |
| UPP1 | Tryptophan metabolism      | ACC | 0.039209079  |
| UPP1 | Tumor endothelial cell     | ACC | 0.086979921  |
| UPP1 | Tyrosine metabolism        | ACC | -0.010997075 |
| UPP1 | Ubiquinone and other ter   | ACC | -0.118699583 |
| UPP1 | Valine, leucine and isoleu | ACC | 0.433752566  |
| UPP1 | Valine, leucine and isoleu | ACC | -0.073730481 |
| UPP1 | Vascular endothelial cell  | ACC | 0.270187766  |
| UPP1 | Vascular smooth muscle c   | ACC | 0.132048738  |
| UPP1 | Vegf_signaling_pathway     | ACC | 0.122676141  |
| UPP1 | Vitamin b6 metabolism      | ACC | 0.029897907  |
| UPP1 | Willert_wnt_signaling      | ACC | -0.117138275 |
| UPP1 | Wnt_beta_catenin_signali   | ACC | -0.018398771 |
| UPP2 | Abnormal plasma cell       | ACC | 0.132233004  |
| UPP2 | Activated b cell           | ACC | 0.006540738  |
| UPP2 | Activated cd4+ t cell      | ACC | 0.242152354  |
| UPP2 | Activated t cell           | ACC | 0.106345677  |
| UPP2 | Alanine, aspartate and glu | ACC | 0.105217066  |
| UPP2 | Alcala_apoptosis           | ACC | -0.109010669 |
| UPP2 | Alpha-linolenic acid meta  | ACC | 0.049821263  |
| UPP2 | Amino sugar and nucleoti   | ACC | 0.145156733  |
| UPP2 | Ampk_pathway               | ACC | -0.224845045 |
| UPP2 | Angiogenesis               | ACC | -0.123688877 |
| UPP2 | Arachidonic acid metabo    | ACC | -0.016702591 |
| UPP2 | Arginine and proline metε  | ACC | 0.289250335  |
| UPP2 | Arginine biosynthesis      | ACC | 0.060503213  |
| UPP2 | Ascorbate and aldarate mε  | ACC | 0.37897866   |
| UPP2 | Atypical memory b cell     | ACC | 0.09800525   |
| UPP2 | Axl+siglec6+ dendritic ce  | ACC | -0.043182243 |
| UPP2 | B cell                     | ACC | 0.130984581  |
| UPP2 | B1 cell                    | ACC | -0.078883822 |
| UPP2 | Basal cell                 | ACC | -0.101963685 |
| UPP2 | Beta-alanine metabolism    | ACC | 0.084931675  |
| UPP2 | Biosynthesis of unsaturate | ACC | -0.224166534 |
| UPP2 | Biotin metabolism          | ACC | 0.062885441  |
| UPP2 | Butanoate metabolism       | ACC | 0.159117035  |
| UPP2 | Caffeine metabolism        | ACC | 0.247354332  |
| UPP2 | Cancer stem cell           | ACC | -0.011703857 |
| UPP2 | Cancer stem-like cell      | ACC | 0.093977168  |
| UPP2 | Cd4+ cytotoxic t cell      | ACC | 0.164179445  |



|      |                              |     |              |
|------|------------------------------|-----|--------------|
| UPP2 | Cd4+ memory t cell           | ACC | 0.248382818  |
| UPP2 | Cd4+ regulatory t cell       | ACC | 0.166060551  |
| UPP2 | Cd4+ t helper cell           | ACC | 0.202579038  |
| UPP2 | Cd4+cd25+ regulatory t c     | ACC | 0.201064485  |
| UPP2 | Cd8+ cytotoxic t cell        | ACC | 0.101412032  |
| UPP2 | Cd8+ regulatory t cell       | ACC | 0.130561117  |
| UPP2 | Cell_cycle                   | ACC | -0.265616505 |
| UPP2 | Chandran_metastasis_top5     | ACC | 0.149900393  |
| UPP2 | Citrate cycle (tca cycle)    | ACC | 0.124600724  |
| UPP2 | Cysteine and methionine r    | ACC | -0.005005306 |
| UPP2 | Cytokine induced killer c    | ACC | 0.285980709  |
| UPP2 | D-arginine and d-ornithin    | ACC | -0.080881743 |
| UPP2 | D-glutamine and d-glutan     | ACC | 0.013461783  |
| UPP2 | Dendritic cell               | ACC | 0.103132835  |
| UPP2 | Dna_repair                   | ACC | -0.356476848 |
| UPP2 | Dna_replication              | ACC | -0.246060066 |
| UPP2 | Double-negative memory       | ACC | 0.095438709  |
| UPP2 | Drug metabolism - cytoch     | ACC | 0.391329865  |
| UPP2 | Drug metabolism - other      | ACC | 0.056325049  |
| UPP2 | E2f_targets                  | ACC | -0.253752348 |
| UPP2 | Ecm_receptor_interaction     | ACC | -0.272027398 |
| UPP2 | Effector cd4+ memory t (     | ACC | 0.224950883  |
| UPP2 | Effector cd8+ memory t (     | ACC | 0.145118684  |
| UPP2 | Effector memory t cell       | ACC | 0.266295856  |
| UPP2 | Effector regulatory t (treg  | ACC | 0.187302187  |
| UPP2 | Elvidge_hif1a_targets_up     | ACC | 0.040513296  |
| UPP2 | Endothelial cell             | ACC | -0.118840792 |
| UPP2 | Eosinophil                   | ACC | 0.13031132   |
| UPP2 | Ether lipid metabolism       | ACC | 0.077531779  |
| UPP2 | Exhausted cd4+ t cell        | ACC | 0.015787167  |
| UPP2 | Exhausted cd8+ t cell        | ACC | 0.051089451  |
| UPP2 | Exhausted t cell             | ACC | 0.183208744  |
| UPP2 | Fat cell (adipocyte)         | ACC | 0.093144311  |
| UPP2 | Fatty acid biosynthesis      | ACC | 0.123647837  |
| UPP2 | Fatty acid degradation       | ACC | 0.058986479  |
| UPP2 | Fatty acid elongation        | ACC | -0.084888101 |
| UPP2 | Fibroblast                   | ACC | 0.00555827   |
| UPP2 | Folate biosynthesis          | ACC | 0.050707267  |
| UPP2 | Follicular b cell            | ACC | 0.172215285  |
| UPP2 | Follicular dendritic cell    | ACC | -0.076895988 |
| UPP2 | Follicular helper (tfh) t ce | ACC | 0.144516199  |
| UPP2 | Follicular t cell            | ACC | 0.113877268  |
| UPP2 | Foxp3+il-17+ t cell          | ACC | -0.224662367 |

|      |                                |              |
|------|--------------------------------|--------------|
| UPP2 | Fructose and mannose me ACC    | 0.217136601  |
| UPP2 | G2m_checkpoint ACC             | -0.269827174 |
| UPP2 | Galactose metabolism ACC       | 0.016433206  |
| UPP2 | Galie_tumor_stemness_ge ACC    | -0.120690781 |
| UPP2 | Glutathione metabolism ACC     | -0.119970671 |
| UPP2 | Glycerolipid metabolism ACC    | 0.037460619  |
| UPP2 | Glycerophospholipid metε ACC   | 0.08016906   |
| UPP2 | Glycine, serine and threor ACC | -0.04641319  |
| UPP2 | Glycolysis / gluconeogene ACC  | 0.059233391  |
| UPP2 | Glycosaminoglycan biosy1 ACC   | 0.033434751  |
| UPP2 | Glycosaminoglycan biosy1 ACC   | -0.291900536 |
| UPP2 | Glycosaminoglycan biosy1 ACC   | -0.079036008 |
| UPP2 | Glycosaminoglycan degra ACC    | 0.088942237  |
| UPP2 | Glycosphingolipid biosyn1 ACC  | -0.091643598 |
| UPP2 | Glycosphingolipid biosyn1 ACC  | -0.149685834 |
| UPP2 | Glycosphingolipid biosyn1 ACC  | -0.280777519 |
| UPP2 | Glycosylphosphatidylinos: ACC  | 0.006928876  |
| UPP2 | Glyoxylate and dicarboxy ACC   | -0.006384772 |
| UPP2 | Granulocyte ACC                | 0.13090597   |
| UPP2 | Hedgehog_signaling ACC         | -0.052905104 |
| UPP2 | Histidine metabolism ACC       | 0.174142883  |
| UPP2 | Hypoxia ACC                    | 0.013171672  |
| UPP2 | Il-17ralpha t cell ACC         | 0.238529741  |
| UPP2 | Il2_stat5_signaling ACC        | -0.021799764 |
| UPP2 | Il6_jak_stat3_signaling ACC    | 0.005258048  |
| UPP2 | Immune_checkpoints_tunr ACC    | 0.039367093  |
| UPP2 | Immune_inhibition_cytok ACC    | -0.088975377 |
| UPP2 | Inositol phosphate metabo ACC  | -0.102130861 |
| UPP2 | Interleukin_6_signaling ACC    | 0.066769359  |
| UPP2 | Jaeger_metastasis_up ACC       | -0.136301344 |
| UPP2 | Jain_nfkb_signaling ACC        | 0.114430209  |
| UPP2 | Kras_signaling_up ACC          | 0.087446315  |
| UPP2 | Linoleic acid metabolism ACC   | 0.238952454  |
| UPP2 | Lipoic acid metabolism ACC     | 0.032614655  |
| UPP2 | Lysine degradation ACC         | -0.055181512 |
| UPP2 | Lysosome ACC                   | 0.389730685  |
| UPP2 | M1 macrophage ACC              | 0.103312447  |
| UPP2 | M2 macrophage ACC              | 0.180130607  |
| UPP2 | Mannose type o-glycan bi ACC   | -0.341811611 |
| UPP2 | Mapk_signaling_pathway ACC     | -0.018733161 |
| UPP2 | Mapk3_erk1_activation ACC      | 0.144381166  |
| UPP2 | Marginal zone b cell ACC       | 0.196867222  |
| UPP2 | Memory b cell ACC              | 0.200313564  |

|      |                             |     |              |
|------|-----------------------------|-----|--------------|
| UPP2 | Mesenchymal cell            | ACC | -0.236030161 |
| UPP2 | Mesenchymal stem cell       | ACC | 0.052378314  |
| UPP2 | Metabolism of xenobiotic    | ACC | 0.263341767  |
| UPP2 | Migrating cancer stem cel   | ACC | -0.264774523 |
| UPP2 | Mitotic_spindle             | ACC | -0.167270988 |
| UPP2 | Monocyte                    | ACC | 0.142364548  |
| UPP2 | Mtor_signaling_pathway      | ACC | 0.266995523  |
| UPP2 | Mtorc1_signaling            | ACC | -0.130242211 |
| UPP2 | Mucin type o-glycan biosy   | ACC | 0.163457071  |
| UPP2 | Myc_targets_v1              | ACC | -0.333810953 |
| UPP2 | Myeloid cell                | ACC | 0.109041718  |
| UPP2 | N-glycan biosynthesis       | ACC | -0.178542489 |
| UPP2 | Naive b cell                | ACC | 0.037316534  |
| UPP2 | Naive cd4+ t cell           | ACC | 0.248269892  |
| UPP2 | Naive cd8+ t cell           | ACC | -0.143020173 |
| UPP2 | Natural killer cell         | ACC | 0.093573296  |
| UPP2 | Natural killer t (nkt) cell | ACC | -0.011289831 |
| UPP2 | Natural regulatory t (treg) | ACC | 0.265796275  |
| UPP2 | Neomycin, kanamycin an      | ACC | -0.025897781 |
| UPP2 | Neutrophil                  | ACC | 0.132718985  |
| UPP2 | Nicotinate and nicotinami   | ACC | 0.233863523  |
| UPP2 | Nitrogen metabolism         | ACC | 0.380073586  |
| UPP2 | Nod_like_receptor_signal    | ACC | 0.023689626  |
| UPP2 | Notch_signaling             | ACC | -0.112805789 |
| UPP2 | One carbon pool by folate   | ACC | -0.359992534 |
| UPP2 | Other glycan degradation    | ACC | 0.254013305  |
| UPP2 | Other types of o-glycan b   | ACC | -0.221477709 |
| UPP2 | Oxidative phosphorylatio    | ACC | 0.301728589  |
| UPP2 | P53_pathway                 | ACC | 0.081785924  |
| UPP2 | P53_signaling_pathway       | ACC | -0.274861955 |
| UPP2 | Pantothenate and coa bios   | ACC | 0.228582738  |
| UPP2 | Pentose and glucuronate i   | ACC | 0.397605594  |
| UPP2 | Pentose phosphate pathwa    | ACC | 0.078093387  |
| UPP2 | Pericyte                    | ACC | 0.070526038  |
| UPP2 | Phenylalanine metabolism    | ACC | 0.151837762  |
| UPP2 | Phenylalanine, tyrosine ar  | ACC | 0.100038716  |
| UPP2 | Phosphonate and phosphir    | ACC | 0.092433124  |
| UPP2 | Pi3k_akt_activation         | ACC | 0.11737387   |
| UPP2 | Pi3k_akt_mtor_signaling     | ACC | -0.023014095 |
| UPP2 | Porphyrin and chlorophyl    | ACC | 0.218593309  |
| UPP2 | Primary bile acid biosynt   | ACC | 0.454044934  |
| UPP2 | Propanoate metabolism       | ACC | 0.043859277  |
| UPP2 | Purine metabolism           | ACC | -0.294194659 |

|      |                            |      |              |
|------|----------------------------|------|--------------|
| UPP2 | Pyrimidine metabolism      | ACC  | -0.240958311 |
| UPP2 | Pyruvate metabolism        | ACC  | 0.006209152  |
| UPP2 | Regulation_of_autophagy    | ACC  | 0.284699825  |
| UPP2 | Retinol metabolism         | ACC  | 0.319583145  |
| UPP2 | Riboflavin metabolism      | ACC  | -0.02669979  |
| UPP2 | Schmahl_pdgf_signaling     | ACC  | 0.037827509  |
| UPP2 | Selenocompound metabol     | ACC  | -0.013168141 |
| UPP2 | Signaling_by_hippo         | ACC  | -0.186087454 |
| UPP2 | Sphingolipid metabolism    | ACC  | 0.034092824  |
| UPP2 | Starch and sucrose metabo  | ACC  | 0.165906512  |
| UPP2 | Steroid biosynthesis       | ACC  | -0.030934589 |
| UPP2 | Steroid hormone biosynth   | ACC  | 0.32773263   |
| UPP2 | Sulfur metabolism          | ACC  | 0.149263298  |
| UPP2 | Synthesis and degradation  | ACC  | 0.020518575  |
| UPP2 | T helper cell              | ACC  | 0.167980614  |
| UPP2 | T helper1 (th1) cell       | ACC  | 0.132542765  |
| UPP2 | T helper17 (th17) cell     | ACC  | 0.079967813  |
| UPP2 | T helper2 (th2) cell       | ACC  | 0.171087998  |
| UPP2 | T helper9 (th9) cell       | ACC  | 0.078853455  |
| UPP2 | Taurine and hypotaurine r  | ACC  | -0.108309498 |
| UPP2 | Terpenoid backbone biosy   | ACC  | -0.174793147 |
| UPP2 | Tgf_beta_signaling_pathw   | ACC  | -0.346586501 |
| UPP2 | Thiamine metabolism        | ACC  | -0.03125088  |
| UPP2 | Tnfa_signaling_via_nfbk    | ACC  | -0.150266291 |
| UPP2 | Tryptophan metabolism      | ACC  | 0.06442235   |
| UPP2 | Tumor endothelial cell     | ACC  | -0.18408661  |
| UPP2 | Tyrosine metabolism        | ACC  | 0.191382938  |
| UPP2 | Ubiquinone and other ter   | ACC  | 0.046633073  |
| UPP2 | Valine, leucine and isoleu | ACC  | -0.13718906  |
| UPP2 | Valine, leucine and isoleu | ACC  | 0.084834408  |
| UPP2 | Vascular endothelial cell  | ACC  | 0.042120817  |
| UPP2 | Vascular smooth muscle c   | ACC  | -0.033483611 |
| UPP2 | Vegf_signaling_pathway     | ACC  | 0.010111086  |
| UPP2 | Vitamin b6 metabolism      | ACC  | -0.118740434 |
| UPP2 | Willert_wnt_signaling      | ACC  | -0.443598149 |
| UPP2 | Wnt_beta_catenin_signali   | ACC  | -0.261734412 |
| CDA  | Abnormal plasma cell       | BLCA | 0.233192265  |
| CDA  | Activated b cell           | BLCA | 0.294148378  |
| CDA  | Activated cd4+ t cell      | BLCA | 0.360864128  |
| CDA  | Activated t cell           | BLCA | 0.34827046   |
| CDA  | Alanine, aspartate and glu | BLCA | -0.352713207 |
| CDA  | Alcala_apoptosis           | BLCA | 0.314632967  |
| CDA  | Alpha-linolenic acid meta  | BLCA | -0.28230882  |

|     |                                      |      |              |
|-----|--------------------------------------|------|--------------|
| CDA | Amino sugar and nucleoti             | BLCA | 0.271528589  |
| CDA | Ampk_pathway                         | BLCA | -0.017753753 |
| CDA | Angiogenesis                         | BLCA | 0.514421893  |
| CDA | Arachidonic acid metabol             | BLCA | -0.0064885   |
| CDA | Arginine and proline metε            | BLCA | 0.078224036  |
| CDA | Arginine biosynthesis                | BLCA | -0.150705939 |
| CDA | Ascorbate and aldarate mε            | BLCA | -0.397212871 |
| CDA | Atypical memory b cell               | BLCA | 0.164487221  |
| CDA | Axl+siglec6+ dendritic ce            | BLCA | 0.434891405  |
| CDA | B cell                               | BLCA | 0.246109395  |
| CDA | B1 cell                              | BLCA | 0.198658869  |
| CDA | Basal cell                           | BLCA | 0.281043009  |
| CDA | Beta-alanine metabolism              | BLCA | -0.164453535 |
| CDA | Biosynthesis of unsaturate           | BLCA | -0.117176343 |
| CDA | Biotin metabolism                    | BLCA | -0.299890413 |
| CDA | Butanoate metabolism                 | BLCA | -0.420303921 |
| CDA | Caffeine metabolism                  | BLCA | -0.1158374   |
| CDA | Cancer stem cell                     | BLCA | 0.501897031  |
| CDA | Cancer stem-like cell                | BLCA | 0.25971103   |
| CDA | Cd4+ cytotoxic t cell                | BLCA | 0.398780156  |
| CDA | Cd4+ memory t cell                   | BLCA | 0.132353182  |
| CDA | Cd4+ regulatory t cell               | BLCA | 0.361781546  |
| CDA | Cd4+ t helper cell                   | BLCA | 0.30256534   |
| CDA | Cd4+cd25+ regulatory t c             | BLCA | 0.319246073  |
| CDA | Cd8+ cytotoxic t cell                | BLCA | 0.32810943   |
| CDA | Cd8+ regulatory t cell               | BLCA | 0.304235483  |
| CDA | Cell_cycle                           | BLCA | 0.120837385  |
| CDA | Chandran_metastasis_top <sup>5</sup> | BLCA | -0.289107627 |
| CDA | Citrate cycle (tca cycle)            | BLCA | -0.106713487 |
| CDA | Cysteine and methionine r            | BLCA | -0.246610062 |
| CDA | Cytokine induced killer cε           | BLCA | 0.275341767  |
| CDA | D-arginine and d-ornithin            | BLCA | 0.089604727  |
| CDA | D-glutamine and d-glutan             | BLCA | -0.124439918 |
| CDA | Dendritic cell                       | BLCA | 0.47144398   |
| CDA | Dna_repair                           | BLCA | 0.058125442  |
| CDA | Dna_replication                      | BLCA | 0.16653568   |
| CDA | Double-negative memory               | BLCA | 0.174267045  |
| CDA | Drug metabolism - cytoch             | BLCA | -0.37579158  |
| CDA | Drug metabolism - other ε            | BLCA | -0.060969614 |
| CDA | E2f_targets                          | BLCA | 0.096025655  |
| CDA | Ecm_receptor_interaction             | BLCA | 0.529940489  |
| CDA | Effector cd4+ memory t (             | BLCA | 0.093061946  |
| CDA | Effector cd8+ memory t (             | BLCA | 0.47064974   |

|     |                              |      |              |
|-----|------------------------------|------|--------------|
| CDA | Effector memory t cell       | BLCA | 0.24123284   |
| CDA | Effector regulatory t (treg  | BLCA | 0.372051269  |
| CDA | Elvidge_hif1a_targets_up     | BLCA | 0.112029593  |
| CDA | Endothelial cell             | BLCA | 0.455717353  |
| CDA | Eosinophil                   | BLCA | 0.421000608  |
| CDA | Ether lipid metabolism       | BLCA | -0.13580651  |
| CDA | Exhausted cd4+ t cell        | BLCA | 0.456267303  |
| CDA | Exhausted cd8+ t cell        | BLCA | 0.403460385  |
| CDA | Exhausted t cell             | BLCA | 0.270031084  |
| CDA | Fat cell (adipocyte)         | BLCA | -0.065637932 |
| CDA | Fatty acid biosynthesis      | BLCA | -0.39918837  |
| CDA | Fatty acid degradation       | BLCA | -0.503745923 |
| CDA | Fatty acid elongation        | BLCA | 0.047126636  |
| CDA | Fibroblast                   | BLCA | 0.472885207  |
| CDA | Folate biosynthesis          | BLCA | -0.187516591 |
| CDA | Follicular b cell            | BLCA | 0.209940674  |
| CDA | Follicular dendritic cell    | BLCA | 0.174402406  |
| CDA | Follicular helper (tfh) t ce | BLCA | 0.337617196  |
| CDA | Follicular t cell            | BLCA | 0.279378993  |
| CDA | Foxp3+il-17+ t cell          | BLCA | 0.190841427  |
| CDA | Fructose and mannose me      | BLCA | -0.008720489 |
| CDA | G2m_checkpoint               | BLCA | 0.094936396  |
| CDA | Galactose metabolism         | BLCA | 0.289901568  |
| CDA | Galie_tumor_stemness_ge      | BLCA | 0.440301641  |
| CDA | Glutathione metabolism       | BLCA | -0.092792454 |
| CDA | Glycerolipid metabolism      | BLCA | -0.211285089 |
| CDA | Glycerophospholipid met      | BLCA | -0.189240124 |
| CDA | Glycine, serine and threor   | BLCA | -0.201415537 |
| CDA | Glycolysis / gluconeogene    | BLCA | -0.106424497 |
| CDA | Glycosaminoglycan biosy      | BLCA | 0.590110775  |
| CDA | Glycosaminoglycan biosy      | BLCA | 0.186003299  |
| CDA | Glycosaminoglycan biosy      | BLCA | 0.258225552  |
| CDA | Glycosaminoglycan degra      | BLCA | 0.236177417  |
| CDA | Glycosphingolipid biosyn     | BLCA | 0.298621307  |
| CDA | Glycosphingolipid biosyn     | BLCA | 0.134900979  |
| CDA | Glycosphingolipid biosyn     | BLCA | 0.161939112  |
| CDA | Glycosylphosphatidylinos     | BLCA | -0.345012413 |
| CDA | Glyoxylate and dicarboxy     | BLCA | -0.224362548 |
| CDA | Granulocyte                  | BLCA | 0.487295942  |
| CDA | Hedgehog_signaling           | BLCA | 0.324730958  |
| CDA | Histidine metabolism         | BLCA | -0.092002574 |
| CDA | Hypoxia                      | BLCA | 0.488191908  |
| CDA | Il-17ralpha t cell           | BLCA | 0.319418342  |

|     |                             |      |              |
|-----|-----------------------------|------|--------------|
| CDA | Il2_stat5_signaling         | BLCA | 0.516313338  |
| CDA | Il6_jak_stat3_signaling     | BLCA | 0.510295233  |
| CDA | Immune_checkpoints_tunr     | BLCA | 0.37995795   |
| CDA | Immune_inhibition_cytok     | BLCA | 0.507254358  |
| CDA | Inositol phosphate metabo   | BLCA | -0.251318514 |
| CDA | Interleukin_6_signaling     | BLCA | 0.341851266  |
| CDA | Jaeger_metastasis_up        | BLCA | 0.341510312  |
| CDA | Jain_nfkb_signaling         | BLCA | -0.103810881 |
| CDA | Kras_signaling_up           | BLCA | 0.477952397  |
| CDA | Linoleic acid metabolism    | BLCA | -0.329960687 |
| CDA | Lipoic acid metabolism      | BLCA | -0.379313062 |
| CDA | Lysine degradation          | BLCA | -0.260745688 |
| CDA | Lysosome                    | BLCA | 0.244025205  |
| CDA | M1 macrophage               | BLCA | 0.387454594  |
| CDA | M2 macrophage               | BLCA | 0.472170784  |
| CDA | Mannose type o-glycan bi    | BLCA | 0.042538117  |
| CDA | Mapk_signaling_pathway      | BLCA | 0.415320134  |
| CDA | Mapk3_erk1_activation       | BLCA | 0.302974637  |
| CDA | Marginal zone b cell        | BLCA | 0.253479329  |
| CDA | Memory b cell               | BLCA | 0.301366368  |
| CDA | Mesenchymal cell            | BLCA | 0.534496836  |
| CDA | Mesenchymal stem cell       | BLCA | 0.498172876  |
| CDA | Metabolism of xenobiotic    | BLCA | -0.366905035 |
| CDA | Migrating cancer stem cel   | BLCA | 0.221053459  |
| CDA | Mitotic_spindle             | BLCA | 0.150811188  |
| CDA | Monocyte                    | BLCA | 0.484395522  |
| CDA | Mtor_signaling_pathway      | BLCA | -0.00252868  |
| CDA | Mtorc1_signaling            | BLCA | 0.209944906  |
| CDA | Mucin type o-glycan biosy   | BLCA | 0.101664236  |
| CDA | Myc_targets_v1              | BLCA | 0.108768129  |
| CDA | Myeloid cell                | BLCA | 0.406106999  |
| CDA | N-glycan biosynthesis       | BLCA | -0.005851625 |
| CDA | Naive b cell                | BLCA | 0.186955781  |
| CDA | Naive cd4+ t cell           | BLCA | 0.115946509  |
| CDA | Naive cd8+ t cell           | BLCA | 0.037605602  |
| CDA | Natural killer cell         | BLCA | 0.372583592  |
| CDA | Natural killer t (nkt) cell | BLCA | 0.101671427  |
| CDA | Natural regulatory t (treg) | BLCA | 0.198517032  |
| CDA | Neomycin, kanamycin an      | BLCA | 0.402223679  |
| CDA | Neutrophil                  | BLCA | 0.527282327  |
| CDA | Nicotinate and nicotinami   | BLCA | 0.22986025   |
| CDA | Nitrogen metabolism         | BLCA | -0.111258462 |
| CDA | Nod_like_receptor_signal    | BLCA | 0.475701948  |

|     |                            |      |              |
|-----|----------------------------|------|--------------|
| CDA | Notch_signaling            | BLCA | 0.188480934  |
| CDA | One carbon pool by folate  | BLCA | 0.002661032  |
| CDA | Other glycan degradation   | BLCA | -0.081906965 |
| CDA | Other types of o-glycan b  | BLCA | 0.274773507  |
| CDA | Oxidative phosphorylatior  | BLCA | -0.055294681 |
| CDA | P53_pathway                | BLCA | 0.30984133   |
| CDA | P53_signaling_pathway      | BLCA | 0.024567552  |
| CDA | Pantothenate and coa bios  | BLCA | 0.26997674   |
| CDA | Pentose and glucuronate i  | BLCA | -0.41839038  |
| CDA | Pentose phosphate pathwa   | BLCA | 0.022958884  |
| CDA | Pericyte                   | BLCA | 0.510560147  |
| CDA | Phenylalanine metabolism   | BLCA | -0.151133514 |
| CDA | Phenylalanine, tyrosine ar | BLCA | -0.093602551 |
| CDA | Phosphonate and phosphir   | BLCA | -0.297701839 |
| CDA | Pi3k_akt_activation        | BLCA | 0.095810912  |
| CDA | Pi3k_akt_mtor_signaling    | BLCA | 0.181526228  |
| CDA | Porphyrin and chlorophyl   | BLCA | -0.24742687  |
| CDA | Primary bile acid biosynt  | BLCA | 0.004530207  |
| CDA | Propanoate metabolism      | BLCA | -0.473599799 |
| CDA | Purine metabolism          | BLCA | 0.229527189  |
| CDA | Pyrimidine metabolism      | BLCA | 0.238960049  |
| CDA | Pyruvate metabolism        | BLCA | -0.132492911 |
| CDA | Regulation_of_autophagy    | BLCA | 0.007642581  |
| CDA | Retinol metabolism         | BLCA | -0.328245383 |
| CDA | Riboflavin metabolism      | BLCA | 0.340883579  |
| CDA | Schmahl_pdgf_signaling     | BLCA | 0.008304823  |
| CDA | Selenocompound metabol     | BLCA | -0.043022505 |
| CDA | Signaling_by_hippo         | BLCA | 0.132542845  |
| CDA | Sphingolipid metabolism    | BLCA | 0.058587903  |
| CDA | Starch and sucrose metabo  | BLCA | 0.271168758  |
| CDA | Steroid biosynthesis       | BLCA | -0.052846035 |
| CDA | Steroid hormone biosynth   | BLCA | -0.335487564 |
| CDA | Sulfur metabolism          | BLCA | -0.198497277 |
| CDA | Synthesis and degradation  | BLCA | -0.175754783 |
| CDA | T helper cell              | BLCA | 0.375358972  |
| CDA | T helper1 (th1) cell       | BLCA | 0.423939883  |
| CDA | T helper17 (th17) cell     | BLCA | 0.365509843  |
| CDA | T helper2 (th2) cell       | BLCA | 0.268404349  |
| CDA | T helper9 (th9) cell       | BLCA | 0.165589298  |
| CDA | Taurine and hypotaurine r  | BLCA | -0.204393637 |
| CDA | Terpenoid backbone biosy   | BLCA | -0.093798897 |
| CDA | Tgf_beta_signaling_pathw   | BLCA | 0.169419834  |
| CDA | Thiamine metabolism        | BLCA | 0.142188296  |



|      |                            |      |              |
|------|----------------------------|------|--------------|
| CDA  | Tnfa_signaling_via_nfk     | BLCA | 0.497238071  |
| CDA  | Tryptophan metabolism      | BLCA | -0.048823374 |
| CDA  | Tumor endothelial cell     | BLCA | 0.335198986  |
| CDA  | Tyrosine metabolism        | BLCA | -0.267807859 |
| CDA  | Ubiquinone and other ter   | BLCA | -0.073760482 |
| CDA  | Valine, leucine and isoleu | BLCA | 0.139918599  |
| CDA  | Valine, leucine and isoleu | BLCA | -0.469764949 |
| CDA  | Vascular endothelial cell  | BLCA | 0.347778971  |
| CDA  | Vascular smooth muscle c   | BLCA | 0.266553164  |
| CDA  | Vegf_signaling_pathway     | BLCA | 0.206292158  |
| CDA  | Vitamin b6 metabolism      | BLCA | 0.148967246  |
| CDA  | Willert_wnt_signaling      | BLCA | -0.0635283   |
| CDA  | Wnt_beta_catenin_signali   | BLCA | 0.20359668   |
| UCK1 | Abnormal plasma cell       | BLCA | 0.052284644  |
| UCK1 | Activated b cell           | BLCA | 0.087360476  |
| UCK1 | Activated cd4+ t cell      | BLCA | 0.015580206  |
| UCK1 | Activated t cell           | BLCA | 0.053153195  |
| UCK1 | Alanine, aspartate and glu | BLCA | -0.247225197 |
| UCK1 | Alcala_apoptosis           | BLCA | 0.060657653  |
| UCK1 | Alpha-linolenic acid meta  | BLCA | -0.213785216 |
| UCK1 | Amino sugar and nucleoti   | BLCA | 0.00215971   |
| UCK1 | Ampk_pathway               | BLCA | 0.077231967  |
| UCK1 | Angiogenesis               | BLCA | -0.062367525 |
| UCK1 | Arachidonic acid metabol   | BLCA | -0.095207472 |
| UCK1 | Arginine and proline metæ  | BLCA | -0.013691568 |
| UCK1 | Arginine biosynthesis      | BLCA | -0.264161569 |
| UCK1 | Ascorbate and aldarate mε  | BLCA | -0.269823326 |
| UCK1 | Atypical memory b cell     | BLCA | 0.071841509  |
| UCK1 | Axl+siglec6+ dendritic ce  | BLCA | 0.051057409  |
| UCK1 | B cell                     | BLCA | 0.020260261  |
| UCK1 | B1 cell                    | BLCA | 0.041280151  |
| UCK1 | Basal cell                 | BLCA | -0.165659201 |
| UCK1 | Beta-alanine metabolism    | BLCA | -0.143173704 |
| UCK1 | Biosynthesis of unsaturate | BLCA | -0.019076271 |
| UCK1 | Biotin metabolism          | BLCA | -0.0450605   |
| UCK1 | Butanoate metabolism       | BLCA | -0.060530244 |
| UCK1 | Caffeine metabolism        | BLCA | -0.01904755  |
| UCK1 | Cancer stem cell           | BLCA | -0.090233484 |
| UCK1 | Cancer stem-like cell      | BLCA | 0.056158088  |
| UCK1 | Cd4+ cytotoxic t cell      | BLCA | 0.05010719   |
| UCK1 | Cd4+ memory t cell         | BLCA | -0.053180628 |
| UCK1 | Cd4+ regulatory t cell     | BLCA | 0.0278564    |
| UCK1 | Cd4+ t helper cell         | BLCA | 0.016316547  |

|      |                              |      |              |
|------|------------------------------|------|--------------|
| UCK1 | Cd4+cd25+ regulatory t c     | BLCA | 0.016167569  |
| UCK1 | Cd8+ cytotoxic t cell        | BLCA | 0.0672381    |
| UCK1 | Cd8+ regulatory t cell       | BLCA | 0.03177823   |
| UCK1 | Cell_cycle                   | BLCA | 0.02060435   |
| UCK1 | Chandran_metastasis_top5     | BLCA | -0.244296944 |
| UCK1 | Citrate cycle (tca cycle)    | BLCA | -0.048690383 |
| UCK1 | Cysteine and methionine r    | BLCA | -0.067241866 |
| UCK1 | Cytokine induced killer c    | BLCA | 0.085568797  |
| UCK1 | D-arginine and d-ornithin    | BLCA | 0.082032814  |
| UCK1 | D-glutamine and d-glutan     | BLCA | -0.398222565 |
| UCK1 | Dendritic cell               | BLCA | 0.045887867  |
| UCK1 | Dna_repair                   | BLCA | 0.292203356  |
| UCK1 | Dna_replication              | BLCA | 0.260515046  |
| UCK1 | Double-negative memory       | BLCA | 0.099015887  |
| UCK1 | Drug metabolism - cytoch     | BLCA | -0.236564663 |
| UCK1 | Drug metabolism - other c    | BLCA | -0.058192874 |
| UCK1 | E2f_targets                  | BLCA | 0.101463051  |
| UCK1 | Ecm_receptor_interaction     | BLCA | -0.040977033 |
| UCK1 | Effector cd4+ memory t (     | BLCA | -0.111921066 |
| UCK1 | Effector cd8+ memory t (     | BLCA | 0.016784595  |
| UCK1 | Effector memory t cell       | BLCA | -0.054345069 |
| UCK1 | Effector regulatory t (treg  | BLCA | 0.005624192  |
| UCK1 | Elvidge_hif1a_targets_up     | BLCA | -0.195763519 |
| UCK1 | Endothelial cell             | BLCA | 0.012649424  |
| UCK1 | Eosinophil                   | BLCA | 0.012751025  |
| UCK1 | Ether lipid metabolism       | BLCA | -0.312432939 |
| UCK1 | Exhausted cd4+ t cell        | BLCA | 0.001474418  |
| UCK1 | Exhausted cd8+ t cell        | BLCA | -0.033263665 |
| UCK1 | Exhausted t cell             | BLCA | 0.054523612  |
| UCK1 | Fat cell (adipocyte)         | BLCA | 0.075189093  |
| UCK1 | Fatty acid biosynthesis      | BLCA | -0.231560338 |
| UCK1 | Fatty acid degradation       | BLCA | -0.210636026 |
| UCK1 | Fatty acid elongation        | BLCA | 0.108247899  |
| UCK1 | Fibroblast                   | BLCA | 0.001529364  |
| UCK1 | Folate biosynthesis          | BLCA | 0.029012278  |
| UCK1 | Follicular b cell            | BLCA | -0.011193453 |
| UCK1 | Follicular dendritic cell    | BLCA | 0.037505032  |
| UCK1 | Follicular helper (tfh) t ce | BLCA | 0.015175489  |
| UCK1 | Follicular t cell            | BLCA | 0.096324136  |
| UCK1 | Foxp3+il-17+ t cell          | BLCA | -0.010519478 |
| UCK1 | Fructose and mannose me      | BLCA | -0.083457307 |
| UCK1 | G2m_checkpoint               | BLCA | 0.000283142  |
| UCK1 | Galactose metabolism         | BLCA | -0.001414424 |

|      |                            |      |              |
|------|----------------------------|------|--------------|
| UCK1 | Galie_tumor_stemness_ge    | BLCA | -0.052550393 |
| UCK1 | Glutathione metabolism     | BLCA | -0.12597196  |
| UCK1 | Glycerolipid metabolism    | BLCA | -0.113258433 |
| UCK1 | Glycerophospholipid met    | BLCA | -0.176152251 |
| UCK1 | Glycine, serine and threor | BLCA | 0.060360801  |
| UCK1 | Glycolysis / gluconeogene  | BLCA | -0.120451873 |
| UCK1 | Glycosaminoglycan biosyn   | BLCA | 0.152421842  |
| UCK1 | Glycosaminoglycan biosyn   | BLCA | -0.063429485 |
| UCK1 | Glycosaminoglycan biosyn   | BLCA | 0.038240338  |
| UCK1 | Glycosaminoglycan degra    | BLCA | -0.034923588 |
| UCK1 | Glycosphingolipid biosyn   | BLCA | 0.08462911   |
| UCK1 | Glycosphingolipid biosyn   | BLCA | -0.118308323 |
| UCK1 | Glycosphingolipid biosyn   | BLCA | -0.061970052 |
| UCK1 | Glycosylphosphatidylinos   | BLCA | -0.072826648 |
| UCK1 | Glyoxylate and dicarboxy   | BLCA | 0.108111346  |
| UCK1 | Granulocyte                | BLCA | 0.058838719  |
| UCK1 | Hedgehog_signaling         | BLCA | -0.053073202 |
| UCK1 | Histidine metabolism       | BLCA | -0.039151071 |
| UCK1 | Hypoxia                    | BLCA | -0.095718368 |
| UCK1 | Il-17ralpha t cell         | BLCA | 0.005178021  |
| UCK1 | Il2_stat5_signaling        | BLCA | -0.024187175 |
| UCK1 | Il6_jak_stat3_signaling    | BLCA | -0.040416394 |
| UCK1 | Immune_checkpoints_tur     | BLCA | 0.044245285  |
| UCK1 | Immune_inhibition_cytok    | BLCA | 0.071054326  |
| UCK1 | Inositol phosphate metabo  | BLCA | -0.404936944 |
| UCK1 | Interleukin_6_signaling    | BLCA | -0.188659531 |
| UCK1 | Jaeger_metastasis_up       | BLCA | 0.128931774  |
| UCK1 | Jain_nfkb_signaling        | BLCA | -0.146260506 |
| UCK1 | Kras_signaling_up          | BLCA | -0.109667152 |
| UCK1 | Linoleic acid metabolism   | BLCA | -0.19299669  |
| UCK1 | Lipoic acid metabolism     | BLCA | -0.039667626 |
| UCK1 | Lysine degradation         | BLCA | 0.11232652   |
| UCK1 | Lysosome                   | BLCA | -0.088182023 |
| UCK1 | M1 macrophage              | BLCA | -0.057208961 |
| UCK1 | M2 macrophage              | BLCA | 0.02286539   |
| UCK1 | Mannose type o-glycan bi   | BLCA | 0.317838214  |
| UCK1 | Mapk_signaling_pathway     | BLCA | -0.16843816  |
| UCK1 | Mapk3_erk1_activation      | BLCA | -0.196223434 |
| UCK1 | Marginal zone b cell       | BLCA | 0.006023507  |
| UCK1 | Memory b cell              | BLCA | 0.081226348  |
| UCK1 | Mesenchymal cell           | BLCA | 0.068689248  |
| UCK1 | Mesenchymal stem cell      | BLCA | -0.013689453 |
| UCK1 | Metabolism of xenobiotic   | BLCA | -0.184497879 |

|      |                             |      |              |
|------|-----------------------------|------|--------------|
| UCK1 | Migrating cancer stem cel   | BLCA | -0.09297985  |
| UCK1 | Mitotic_spindle             | BLCA | -0.171971489 |
| UCK1 | Monocyte                    | BLCA | -0.024376367 |
| UCK1 | Mtor_signaling_pathway      | BLCA | -0.216990054 |
| UCK1 | Mtorc1_signaling            | BLCA | -0.139167206 |
| UCK1 | Mucin type o-glycan bios    | BLCA | -0.345844602 |
| UCK1 | Myc_targets_v1              | BLCA | 0.050561145  |
| UCK1 | Myeloid cell                | BLCA | -0.002757879 |
| UCK1 | N-glycan biosynthesis       | BLCA | 0.050316302  |
| UCK1 | Naive b cell                | BLCA | 0.037872869  |
| UCK1 | Naive cd4+ t cell           | BLCA | -0.161526966 |
| UCK1 | Naive cd8+ t cell           | BLCA | -0.100433926 |
| UCK1 | Natural killer cell         | BLCA | 0.045690868  |
| UCK1 | Natural killer t (nkt) cell | BLCA | -0.030218383 |
| UCK1 | Natural regulatory t (treg) | BLCA | -0.101003434 |
| UCK1 | Neomycin, kanamycin an      | BLCA | -0.025683194 |
| UCK1 | Neutrophil                  | BLCA | -0.021318564 |
| UCK1 | Nicotinate and nicotinami   | BLCA | 0.011076569  |
| UCK1 | Nitrogen metabolism         | BLCA | -0.151085794 |
| UCK1 | Nod_like_receptor_signal    | BLCA | -0.088557873 |
| UCK1 | Notch_signaling             | BLCA | -0.258456746 |
| UCK1 | One carbon pool by folate   | BLCA | 0.073255843  |
| UCK1 | Other glycan degradation    | BLCA | -0.050989176 |
| UCK1 | Other types of o-glycan b   | BLCA | 0.380271665  |
| UCK1 | Oxidative phosphorylatio    | BLCA | 0.153005983  |
| UCK1 | P53_pathway                 | BLCA | -0.171166097 |
| UCK1 | P53_signaling_pathway       | BLCA | -0.329703583 |
| UCK1 | Pantothenate and coa bios   | BLCA | 0.064211378  |
| UCK1 | Pentose and glucuronate i   | BLCA | -0.271868697 |
| UCK1 | Pentose phosphate pathwa    | BLCA | 0.016172642  |
| UCK1 | Pericyte                    | BLCA | 0.073575452  |
| UCK1 | Phenylalanine metabolism    | BLCA | -0.098937896 |
| UCK1 | Phenylalanine, tyrosine ar  | BLCA | 0.086231154  |
| UCK1 | Phosphonate and phosphir    | BLCA | -0.039002698 |
| UCK1 | Pi3k_akt_activation         | BLCA | -0.241190221 |
| UCK1 | Pi3k_akt_mtor_signaling     | BLCA | -0.236331104 |
| UCK1 | Porphyrin and chlorophyl    | BLCA | -0.112276153 |
| UCK1 | Primary bile acid biosynt   | BLCA | 0.033654622  |
| UCK1 | Propanoate metabolism       | BLCA | -0.309929925 |
| UCK1 | Purine metabolism           | BLCA | 0.137512772  |
| UCK1 | Pyrimidine metabolism       | BLCA | 0.219588101  |
| UCK1 | Pyruvate metabolism         | BLCA | 0.100773958  |
| UCK1 | Regulation_of_autophagy     | BLCA | 0.024874379  |

|      |                            |      |              |
|------|----------------------------|------|--------------|
| UCK1 | Retinol metabolism         | BLCA | -0.209483802 |
| UCK1 | Riboflavin metabolism      | BLCA | 0.383638322  |
| UCK1 | Schmahl_pdgf_signaling     | BLCA | -0.280749387 |
| UCK1 | Selenocompound metabol     | BLCA | -0.002829807 |
| UCK1 | Signaling_by_hippo         | BLCA | -0.127836391 |
| UCK1 | Sphingolipid metabolism    | BLCA | -0.091414551 |
| UCK1 | Starch and sucrose metabo  | BLCA | -0.046962701 |
| UCK1 | Steroid biosynthesis       | BLCA | -0.058992735 |
| UCK1 | Steroid hormone biosynth   | BLCA | -0.217197483 |
| UCK1 | Sulfur metabolism          | BLCA | -0.259626518 |
| UCK1 | Synthesis and degradation  | BLCA | 0.106551481  |
| UCK1 | T helper cell              | BLCA | 0.022964724  |
| UCK1 | T helper1 (th1) cell       | BLCA | 0.034291077  |
| UCK1 | T helper17 (th17) cell     | BLCA | -0.068058414 |
| UCK1 | T helper2 (th2) cell       | BLCA | -0.071640074 |
| UCK1 | T helper9 (th9) cell       | BLCA | -0.037613805 |
| UCK1 | Taurine and hypotaurine r  | BLCA | 0.119402523  |
| UCK1 | Terpenoid backbone biosy   | BLCA | -0.051973751 |
| UCK1 | Tgf_beta_signaling_pathw   | BLCA | -0.294248024 |
| UCK1 | Thiamine metabolism        | BLCA | 0.342717282  |
| UCK1 | Tnfa_signaling_via_nfkb    | BLCA | -0.101922457 |
| UCK1 | Tryptophan metabolism      | BLCA | 0.080469683  |
| UCK1 | Tumor endothelial cell     | BLCA | 0.037410724  |
| UCK1 | Tyrosine metabolism        | BLCA | -0.124671134 |
| UCK1 | Ubiquinone and other terp  | BLCA | 0.095955866  |
| UCK1 | Valine, leucine and isoleu | BLCA | 0.050850061  |
| UCK1 | Valine, leucine and isoleu | BLCA | -0.139228592 |
| UCK1 | Vascular endothelial cell  | BLCA | 0.055993387  |
| UCK1 | Vascular smooth muscle c   | BLCA | 0.023587808  |
| UCK1 | Vegf_signaling_pathway     | BLCA | -0.277943182 |
| UCK1 | Vitamin b6 metabolism      | BLCA | 0.178086072  |
| UCK1 | Willert_wnt_signaling      | BLCA | -0.194275627 |
| UCK1 | Wnt_beta_catenin_signali   | BLCA | -0.092448312 |
| UCK2 | Abnormal plasma cell       | BLCA | 0.003135892  |
| UCK2 | Activated b cell           | BLCA | 0.062954573  |
| UCK2 | Activated cd4+ t cell      | BLCA | 0.040697641  |
| UCK2 | Activated t cell           | BLCA | 0.060446807  |
| UCK2 | Alanine, aspartate and glu | BLCA | 0.062493773  |
| UCK2 | Alcala_apoptosis           | BLCA | 0.177276896  |
| UCK2 | Alpha-linolenic acid meta  | BLCA | -0.260564293 |
| UCK2 | Amino sugar and nucleoti   | BLCA | 0.17468624   |
| UCK2 | Ampk_pathway               | BLCA | 0.10449987   |
| UCK2 | Angiogenesis               | BLCA | 0.023778372  |

|      |                                         |      |              |
|------|-----------------------------------------|------|--------------|
| UCK2 | Arachidonic acid metabolism             | BLCA | -0.227407161 |
| UCK2 | Arginine and proline metabolism         | BLCA | 0.122888943  |
| UCK2 | Arginine biosynthesis                   | BLCA | -0.090491448 |
| UCK2 | Ascorbate and aldarate metabolism       | BLCA | -0.238673742 |
| UCK2 | Atypical memory b cell                  | BLCA | -0.019344719 |
| UCK2 | Axl+siglec6+ dendritic cell             | BLCA | -0.093268379 |
| UCK2 | B cell                                  | BLCA | -0.087888557 |
| UCK2 | B1 cell                                 | BLCA | 0.006403739  |
| UCK2 | Basal cell                              | BLCA | 0.010331809  |
| UCK2 | Beta-alanine metabolism                 | BLCA | -0.069103215 |
| UCK2 | Biosynthesis of unsaturated fatty acids | BLCA | 0.052457703  |
| UCK2 | Biotin metabolism                       | BLCA | -0.04407581  |
| UCK2 | Butanoate metabolism                    | BLCA | -0.105983544 |
| UCK2 | Caffeine metabolism                     | BLCA | -0.056399798 |
| UCK2 | Cancer stem cell                        | BLCA | 0.037089539  |
| UCK2 | Cancer stem-like cell                   | BLCA | 0.036149868  |
| UCK2 | Cd4+ cytotoxic t cell                   | BLCA | 0.01177961   |
| UCK2 | Cd4+ memory t cell                      | BLCA | -0.074597528 |
| UCK2 | Cd4+ regulatory t cell                  | BLCA | 0.024507481  |
| UCK2 | Cd4+ t helper cell                      | BLCA | -0.018650861 |
| UCK2 | Cd4+cd25+ regulatory t cell             | BLCA | 0.001981095  |
| UCK2 | Cd8+ cytotoxic t cell                   | BLCA | 0.093183875  |
| UCK2 | Cd8+ regulatory t cell                  | BLCA | 0.099340648  |
| UCK2 | Cell cycle                              | BLCA | 0.375336667  |
| UCK2 | Chandran_metastasis_top2                | BLCA | 0.158354443  |
| UCK2 | Citrate cycle (tricarballic acid cycle) | BLCA | 0.143471464  |
| UCK2 | Cysteine and methionine metabolism      | BLCA | 0.246426512  |
| UCK2 | Cytokine induced killer cell            | BLCA | -0.014000126 |
| UCK2 | D-arginine and d-ornithine              | BLCA | 0.091529738  |
| UCK2 | D-glutamine and d-glutamate             | BLCA | -0.115742275 |
| UCK2 | Dendritic cell                          | BLCA | 0.0538796    |
| UCK2 | Dna_repair                              | BLCA | 0.363841385  |
| UCK2 | Dna_replication                         | BLCA | 0.486846044  |
| UCK2 | Double-negative memory t cell           | BLCA | -0.024778762 |
| UCK2 | Drug metabolism - cytochrome p450       | BLCA | -0.255493471 |
| UCK2 | Drug metabolism - other                 | BLCA | 0.096432225  |
| UCK2 | E2f_targets                             | BLCA | 0.46836081   |
| UCK2 | Ecm_receptor_interaction                | BLCA | 0.003253707  |
| UCK2 | Effector cd4+ memory t cell             | BLCA | -0.056203693 |
| UCK2 | Effector cd8+ memory t cell             | BLCA | 0.023411536  |
| UCK2 | Effector memory t cell                  | BLCA | 0.012129434  |
| UCK2 | Effector regulatory t (treg)            | BLCA | 0.033084131  |
| UCK2 | Elvidge_hif1a_targets_up                | BLCA | 0.242575092  |

|      |                              |      |              |
|------|------------------------------|------|--------------|
| UCK2 | Endothelial cell             | BLCA | 0.111080694  |
| UCK2 | Eosinophil                   | BLCA | 0.046710429  |
| UCK2 | Ether lipid metabolism       | BLCA | -0.351381481 |
| UCK2 | Exhausted cd4+ t cell        | BLCA | 0.034311049  |
| UCK2 | Exhausted cd8+ t cell        | BLCA | -0.003992167 |
| UCK2 | Exhausted t cell             | BLCA | 0.050745278  |
| UCK2 | Fat cell (adipocyte)         | BLCA | -0.054492714 |
| UCK2 | Fatty acid biosynthesis      | BLCA | -0.172549931 |
| UCK2 | Fatty acid degradation       | BLCA | -0.174150794 |
| UCK2 | Fatty acid elongation        | BLCA | 0.166813022  |
| UCK2 | Fibroblast                   | BLCA | 0.045107057  |
| UCK2 | Folate biosynthesis          | BLCA | 0.056018215  |
| UCK2 | Follicular b cell            | BLCA | -0.070602102 |
| UCK2 | Follicular dendritic cell    | BLCA | -0.036965534 |
| UCK2 | Follicular helper (tfh) t ce | BLCA | -0.003862373 |
| UCK2 | Follicular t cell            | BLCA | 0.090577304  |
| UCK2 | Foxp3+il-17+ t cell          | BLCA | 0.006685322  |
| UCK2 | Fructose and mannose me      | BLCA | 0.007887414  |
| UCK2 | G2m_checkpoint               | BLCA | 0.399796477  |
| UCK2 | Galactose metabolism         | BLCA | 0.044551603  |
| UCK2 | Galie_tumor_stemness_ge      | BLCA | -0.096240119 |
| UCK2 | Glutathione metabolism       | BLCA | 0.106086971  |
| UCK2 | Glycerolipid metabolism      | BLCA | -0.08473994  |
| UCK2 | Glycerophospholipid met      | BLCA | -0.321824355 |
| UCK2 | Glycine, serine and threor   | BLCA | 0.079187537  |
| UCK2 | Glycolysis / gluconeogene    | BLCA | 0.028731442  |
| UCK2 | Glycosaminoglycan biosy      | BLCA | 0.109412512  |
| UCK2 | Glycosaminoglycan biosy      | BLCA | -0.134607236 |
| UCK2 | Glycosaminoglycan biosy      | BLCA | 0.076134271  |
| UCK2 | Glycosaminoglycan degra      | BLCA | -0.10885741  |
| UCK2 | Glycosphingolipid biosyn     | BLCA | -0.119765732 |
| UCK2 | Glycosphingolipid biosyn     | BLCA | -0.246564143 |
| UCK2 | Glycosphingolipid biosyn     | BLCA | -0.101800446 |
| UCK2 | Glycosylphosphatidylinos     | BLCA | 0.025719624  |
| UCK2 | Glyoxylate and dicarboxy     | BLCA | 0.146670324  |
| UCK2 | Granulocyte                  | BLCA | 0.142032588  |
| UCK2 | Hedgehog_signaling           | BLCA | -0.072455948 |
| UCK2 | Histidine metabolism         | BLCA | -0.084820517 |
| UCK2 | Hypoxia                      | BLCA | 0.010669203  |
| UCK2 | Il-17alpha t cell            | BLCA | -0.001179739 |
| UCK2 | Il2_stat5_signaling          | BLCA | 0.050835743  |
| UCK2 | Il6_jak_stat3_signaling      | BLCA | 0.021998101  |
| UCK2 | Immune_checkpoints_turr      | BLCA | 0.036493519  |

|      |                             |      |              |
|------|-----------------------------|------|--------------|
| UCK2 | Immune_inhibition_cytok     | BLCA | 0.107530639  |
| UCK2 | Inositol phosphate metabo   | BLCA | -0.448574369 |
| UCK2 | Interleukin_6_signaling     | BLCA | -0.017057985 |
| UCK2 | Jaeger_metastasis_up        | BLCA | 0.373625732  |
| UCK2 | Jain_nfkb_signaling         | BLCA | 0.317814862  |
| UCK2 | Kras_signaling_up           | BLCA | -0.057803845 |
| UCK2 | Linoleic acid metabolism    | BLCA | -0.303009677 |
| UCK2 | Lipoic acid metabolism      | BLCA | -0.080001406 |
| UCK2 | Lysine degradation          | BLCA | 0.182920662  |
| UCK2 | Lysosome                    | BLCA | -0.202070157 |
| UCK2 | M1 macrophage               | BLCA | 0.0967804    |
| UCK2 | M2 macrophage               | BLCA | 0.107783788  |
| UCK2 | Mannose type o-glycan bi    | BLCA | 0.170929328  |
| UCK2 | Mapk_signaling_pathway      | BLCA | -0.091349394 |
| UCK2 | Mapk3_erk1_activation       | BLCA | 0.037208817  |
| UCK2 | Marginal zone b cell        | BLCA | -0.022730197 |
| UCK2 | Memory b cell               | BLCA | 0.02517665   |
| UCK2 | Mesenchymal cell            | BLCA | 0.087651808  |
| UCK2 | Mesenchymal stem cell       | BLCA | 0.023512218  |
| UCK2 | Metabolism of xenobiotic    | BLCA | -0.207381625 |
| UCK2 | Migrating cancer stem cel   | BLCA | 0.081136548  |
| UCK2 | Mitotic_spindle             | BLCA | 0.107623249  |
| UCK2 | Monocyte                    | BLCA | 0.026608886  |
| UCK2 | Mtor_signaling_pathway      | BLCA | -0.182943142 |
| UCK2 | Mtorc1_signaling            | BLCA | 0.346820212  |
| UCK2 | Mucin type o-glycan biosy   | BLCA | -0.277533982 |
| UCK2 | Myc_targets_v1              | BLCA | 0.48256922   |
| UCK2 | Myeloid cell                | BLCA | 0.049388434  |
| UCK2 | N-glycan biosynthesis       | BLCA | 0.116392218  |
| UCK2 | Naive b cell                | BLCA | -0.00749803  |
| UCK2 | Naive cd4+ t cell           | BLCA | -0.132366741 |
| UCK2 | Naive cd8+ t cell           | BLCA | -0.218923433 |
| UCK2 | Natural killer cell         | BLCA | 0.066415575  |
| UCK2 | Natural killer t (nkt) cell | BLCA | 0.118012057  |
| UCK2 | Natural regulatory t (treg) | BLCA | -0.100846878 |
| UCK2 | Neomycin, kanamycin an      | BLCA | 0.057213102  |
| UCK2 | Neutrophil                  | BLCA | 0.093000577  |
| UCK2 | Nicotinate and nicotinami   | BLCA | -0.1210363   |
| UCK2 | Nitrogen metabolism         | BLCA | -0.017435685 |
| UCK2 | Nod_like_receptor_signal    | BLCA | 0.043344219  |
| UCK2 | Notch_signaling             | BLCA | -0.105171124 |
| UCK2 | One carbon pool by folate   | BLCA | 0.377802613  |
| UCK2 | Other glycan degradation    | BLCA | -0.205706529 |



|      |                                                   |      |              |
|------|---------------------------------------------------|------|--------------|
| UCK2 | Other types of o-glycan b                         | BLCA | 0.17002478   |
| UCK2 | Oxidative phosphorylation                         | BLCA | 0.187606965  |
| UCK2 | P53_pathway                                       | BLCA | -0.213285455 |
| UCK2 | P53_signaling_pathway                             | BLCA | -0.149784399 |
| UCK2 | Pantothenate and coa biosynthesis                 | BLCA | 0.051433627  |
| UCK2 | Pentose and glucuronate interconversions          | BLCA | -0.235097263 |
| UCK2 | Pentose phosphate pathway                         | BLCA | 0.128906542  |
| UCK2 | Pericyte                                          | BLCA | 0.042461652  |
| UCK2 | Phenylalanine metabolism                          | BLCA | -0.097839559 |
| UCK2 | Phenylalanine, tyrosine and tryptophan metabolism | BLCA | 0.046526436  |
| UCK2 | Phosphonate and phosphite metabolism              | BLCA | -0.044596294 |
| UCK2 | Pi3k_akt_activation                               | BLCA | -0.168719296 |
| UCK2 | Pi3k_akt_mtor_signaling                           | BLCA | -0.038278298 |
| UCK2 | Porphyrin and chlorophyll metabolism              | BLCA | -0.055401192 |
| UCK2 | Primary bile acid biosynthesis                    | BLCA | -0.114695106 |
| UCK2 | Propanoate metabolism                             | BLCA | -0.20139027  |
| UCK2 | Purine metabolism                                 | BLCA | 0.457069742  |
| UCK2 | Pyrimidine metabolism                             | BLCA | 0.509313546  |
| UCK2 | Pyruvate metabolism                               | BLCA | 0.227737996  |
| UCK2 | Regulation_of_autophagy                           | BLCA | 0.007993354  |
| UCK2 | Retinol metabolism                                | BLCA | -0.288303846 |
| UCK2 | Riboflavin metabolism                             | BLCA | 0.324521243  |
| UCK2 | Schmahl_pdgf_signaling                            | BLCA | -0.336827328 |
| UCK2 | Selenocompound metabolism                         | BLCA | 0.138619185  |
| UCK2 | Signaling_by_hippo                                | BLCA | -0.062922869 |
| UCK2 | Sphingolipid metabolism                           | BLCA | -0.1101712   |
| UCK2 | Starch and sucrose metabolism                     | BLCA | -0.149141343 |
| UCK2 | Steroid biosynthesis                              | BLCA | 0.163288472  |
| UCK2 | Steroid hormone biosynthesis                      | BLCA | -0.262831222 |
| UCK2 | Sulfur metabolism                                 | BLCA | -0.188963924 |
| UCK2 | Synthesis and degradation of ribonucleotides      | BLCA | 0.017798731  |
| UCK2 | T helper cell                                     | BLCA | 0.01179213   |
| UCK2 | T helper1 (th1) cell                              | BLCA | 0.07069572   |
| UCK2 | T helper17 (th17) cell                            | BLCA | -0.004863795 |
| UCK2 | T helper2 (th2) cell                              | BLCA | -0.122750164 |
| UCK2 | T helper9 (th9) cell                              | BLCA | -0.154574885 |
| UCK2 | Taurine and hypotaurine metabolism                | BLCA | -0.129292761 |
| UCK2 | Terpenoid backbone biosynthesis                   | BLCA | 0.231435177  |
| UCK2 | Tgf_beta_signaling_pathway                        | BLCA | -0.1747834   |
| UCK2 | Thiamine metabolism                               | BLCA | 0.21044681   |
| UCK2 | Tnfa_signaling_via_nfkB                           | BLCA | 0.023191524  |
| UCK2 | Tryptophan metabolism                             | BLCA | 0.08403022   |
| UCK2 | Tumor endothelial cell                            | BLCA | 0.248312663  |

|       |                                   |      |              |
|-------|-----------------------------------|------|--------------|
| UCK2  | Tyrosine metabolism               | BLCA | -0.210991326 |
| UCK2  | Ubiquinone and other terpenoid    | BLCA | 0.177986911  |
| UCK2  | Valine, leucine and isoleucine    | BLCA | 0.133682007  |
| UCK2  | Valine, leucine and isoleucine    | BLCA | -0.12274001  |
| UCK2  | Vascular endothelial cell         | BLCA | 0.020944656  |
| UCK2  | Vascular smooth muscle cell       | BLCA | -0.010277788 |
| UCK2  | Vegf_signaling_pathway            | BLCA | -0.262658654 |
| UCK2  | Vitamin b6 metabolism             | BLCA | 0.164990199  |
| UCK2  | Willert_wnt_signaling             | BLCA | 0.022260183  |
| UCK2  | Wnt_beta_catenin_signaling        | BLCA | -0.039646603 |
| UCKL1 | Abnormal plasma cell              | BLCA | -0.170864234 |
| UCKL1 | Activated b cell                  | BLCA | -0.164056947 |
| UCKL1 | Activated cd4+ t cell             | BLCA | -0.249543056 |
| UCKL1 | Activated t cell                  | BLCA | -0.225290644 |
| UCKL1 | Alanine, aspartate and glutamate  | BLCA | 0.050071932  |
| UCKL1 | Alcalal apoptosis                 | BLCA | -0.100343743 |
| UCKL1 | Alpha-linolenic acid metabolism   | BLCA | 0.007112123  |
| UCKL1 | Amino sugar and nucleotide        | BLCA | -0.202933309 |
| UCKL1 | Ampk_pathway                      | BLCA | 0.144855778  |
| UCKL1 | Angiogenesis                      | BLCA | -0.287061678 |
| UCKL1 | Arachidonic acid metabolism       | BLCA | -0.093607218 |
| UCKL1 | Arginine and proline metabolism   | BLCA | -0.150486741 |
| UCKL1 | Arginine biosynthesis             | BLCA | -0.000944427 |
| UCKL1 | Ascorbate and aldarate metabolism | BLCA | -0.05653072  |
| UCKL1 | Atypical memory b cell            | BLCA | -0.169859759 |
| UCKL1 | Axl+siglec6+ dendritic cell       | BLCA | -0.331654748 |
| UCKL1 | B cell                            | BLCA | -0.257196415 |
| UCKL1 | B1 cell                           | BLCA | -0.155741739 |
| UCKL1 | Basal cell                        | BLCA | -0.086089368 |
| UCKL1 | Beta-alanine metabolism           | BLCA | -0.221516622 |
| UCKL1 | Biosynthesis of unsaturated       | BLCA | -0.07209484  |
| UCKL1 | Biotin metabolism                 | BLCA | 0.102639951  |
| UCKL1 | Butanoate metabolism              | BLCA | 0.065960496  |
| UCKL1 | Caffeine metabolism               | BLCA | -0.158587293 |
| UCKL1 | Cancer stem cell                  | BLCA | -0.372184994 |
| UCKL1 | Cancer stem-like cell             | BLCA | -0.211918911 |
| UCKL1 | Cd4+ cytotoxic t cell             | BLCA | -0.260180121 |
| UCKL1 | Cd4+ memory t cell                | BLCA | -0.071952462 |
| UCKL1 | Cd4+ regulatory t cell            | BLCA | -0.242917435 |
| UCKL1 | Cd4+ t helper cell                | BLCA | -0.228071478 |
| UCKL1 | Cd4+cd25+ regulatory t cell       | BLCA | -0.230023015 |
| UCKL1 | Cd8+ cytotoxic t cell             | BLCA | -0.171408883 |
| UCKL1 | Cd8+ regulatory t cell            | BLCA | -0.234299718 |

|       |                              |      |              |
|-------|------------------------------|------|--------------|
| UCKL1 | Cell_cycle                   | BLCA | -0.04328374  |
| UCKL1 | Chandran_metastasis_top      | BLCA | -0.008722977 |
| UCKL1 | Citrate cycle (tca cycle)    | BLCA | 0.04095451   |
| UCKL1 | Cysteine and methionine r    | BLCA | 0.040984759  |
| UCKL1 | Cytokine induced killer c    | BLCA | -0.193362488 |
| UCKL1 | D-arginine and d-ornithin    | BLCA | 0.021570035  |
| UCKL1 | D-glutamine and d-glutan     | BLCA | -0.009057929 |
| UCKL1 | Dendritic cell               | BLCA | -0.26745061  |
| UCKL1 | Dna_repair                   | BLCA | 0.252048454  |
| UCKL1 | Dna_replication              | BLCA | 0.041247516  |
| UCKL1 | Double-negative memory       | BLCA | -0.098986862 |
| UCKL1 | Drug metabolism - cytoch     | BLCA | 0.01840317   |
| UCKL1 | Drug metabolism - other      | BLCA | 0.106464341  |
| UCKL1 | E2f_targets                  | BLCA | 0.009199534  |
| UCKL1 | Ecm_receptor_interaction     | BLCA | -0.306958158 |
| UCKL1 | Effector cd4+ memory t       | BLCA | -0.07793827  |
| UCKL1 | Effector cd8+ memory t       | BLCA | -0.26863537  |
| UCKL1 | Effector memory t cell       | BLCA | -0.20364292  |
| UCKL1 | Effector regulatory t (treg  | BLCA | -0.268126476 |
| UCKL1 | Elvidge_hif1a_targets_up     | BLCA | -0.285984539 |
| UCKL1 | Endothelial cell             | BLCA | -0.331262094 |
| UCKL1 | Eosinophil                   | BLCA | -0.277148172 |
| UCKL1 | Ether lipid metabolism       | BLCA | -0.092386955 |
| UCKL1 | Exhausted cd4+ t cell        | BLCA | -0.345667326 |
| UCKL1 | Exhausted cd8+ t cell        | BLCA | -0.330510082 |
| UCKL1 | Exhausted t cell             | BLCA | -0.179779403 |
| UCKL1 | Fat cell (adipocyte)         | BLCA | 0.101035053  |
| UCKL1 | Fatty acid biosynthesis      | BLCA | 0.018498533  |
| UCKL1 | Fatty acid degradation       | BLCA | 0.010017185  |
| UCKL1 | Fatty acid elongation        | BLCA | -0.029188477 |
| UCKL1 | Fibroblast                   | BLCA | -0.301660156 |
| UCKL1 | Folate biosynthesis          | BLCA | 0.113730664  |
| UCKL1 | Follicular b cell            | BLCA | -0.201411276 |
| UCKL1 | Follicular dendritic cell    | BLCA | -0.157263479 |
| UCKL1 | Follicular helper (tfh) t ce | BLCA | -0.237614308 |
| UCKL1 | Follicular t cell            | BLCA | -0.137498981 |
| UCKL1 | Foxp3+il-17+ t cell          | BLCA | -0.165052552 |
| UCKL1 | Fructose and mannose me      | BLCA | 0.146933394  |
| UCKL1 | G2m_checkpoint               | BLCA | -0.06406063  |
| UCKL1 | Galactose metabolism         | BLCA | -0.075257486 |
| UCKL1 | Galie_tumor_stemness_ge      | BLCA | -0.328055007 |
| UCKL1 | Glutathione metabolism       | BLCA | -0.011099894 |
| UCKL1 | Glycerolipid metabolism      | BLCA | 0.059114358  |

|       |                                          |      |              |
|-------|------------------------------------------|------|--------------|
| UCKL1 | Glycerophospholipid metabolism           | BLCA | 0.16911111   |
| UCKL1 | Glycine, serine and threonine metabolism | BLCA | 0.03352665   |
| UCKL1 | Glycolysis / gluconeogenesis             | BLCA | -0.007956644 |
| UCKL1 | Glycosaminoglycan biosynthesis           | BLCA | -0.190759819 |
| UCKL1 | Glycosaminoglycan biosynthesis           | BLCA | -0.145839549 |
| UCKL1 | Glycosaminoglycan biosynthesis           | BLCA | -0.17033552  |
| UCKL1 | Glycosaminoglycan degradation            | BLCA | -0.199920578 |
| UCKL1 | Glycosphingolipid biosynthesis           | BLCA | -0.238189894 |
| UCKL1 | Glycosphingolipid biosynthesis           | BLCA | -0.202168222 |
| UCKL1 | Glycosphingolipid biosynthesis           | BLCA | -0.228515075 |
| UCKL1 | Glycosylphosphatidylinositol signaling   | BLCA | 0.162116797  |
| UCKL1 | Glyoxylate and dicarboxylate metabolism  | BLCA | 0.130841896  |
| UCKL1 | Granulocyte                              | BLCA | -0.259029412 |
| UCKL1 | Hedgehog signaling                       | BLCA | -0.220179035 |
| UCKL1 | Histidine metabolism                     | BLCA | -0.22898377  |
| UCKL1 | Hypoxia                                  | BLCA | -0.242499121 |
| UCKL1 | IL-17 receptor signaling                 | BLCA | -0.225819505 |
| UCKL1 | IL2 signaling                            | BLCA | -0.33284113  |
| UCKL1 | IL6 signaling                            | BLCA | -0.343510329 |
| UCKL1 | Immune checkpoints                       | BLCA | -0.278736084 |
| UCKL1 | Immune inhibition                        | BLCA | -0.238335373 |
| UCKL1 | Inositol phosphate metabolism            | BLCA | -0.206903401 |
| UCKL1 | Interleukin_6 signaling                  | BLCA | -0.361061242 |
| UCKL1 | Jaeger metastasis up                     | BLCA | -0.175303017 |
| UCKL1 | Jain_nfkB signaling                      | BLCA | 0.132836763  |
| UCKL1 | Kras signaling up                        | BLCA | -0.365412637 |
| UCKL1 | Linoleic acid metabolism                 | BLCA | 0.01032203   |
| UCKL1 | Lipoic acid metabolism                   | BLCA | 0.233783907  |
| UCKL1 | Lysine degradation                       | BLCA | 0.054208283  |
| UCKL1 | Lysosome                                 | BLCA | -0.245067353 |
| UCKL1 | M1 macrophage                            | BLCA | -0.264912758 |
| UCKL1 | M2 macrophage                            | BLCA | -0.253502864 |
| UCKL1 | Mannose type o-glycan biosynthesis       | BLCA | 0.201816883  |
| UCKL1 | Mapk signaling pathway                   | BLCA | -0.348942916 |
| UCKL1 | Mapk3_erk1 activation                    | BLCA | -0.338400658 |
| UCKL1 | Marginal zone b cell                     | BLCA | -0.256313447 |
| UCKL1 | Memory b cell                            | BLCA | -0.197538711 |
| UCKL1 | Mesenchymal cell                         | BLCA | -0.223774804 |
| UCKL1 | Mesenchymal stem cell                    | BLCA | -0.328581166 |
| UCKL1 | Metabolism of xenobiotics                | BLCA | 0.033316456  |
| UCKL1 | Migrating cancer stem cell               | BLCA | -0.142847474 |
| UCKL1 | Mitotic spindle                          | BLCA | -0.228667418 |
| UCKL1 | Monocyte                                 | BLCA | -0.298286528 |

|       |                                                   |      |              |
|-------|---------------------------------------------------|------|--------------|
| UCKL1 | Mtor_signaling_pathway                            | BLCA | -0.172645344 |
| UCKL1 | Mtorc1_signaling                                  | BLCA | -0.199234572 |
| UCKL1 | Mucin type o-glycan biosynthesis                  | BLCA | -0.414988719 |
| UCKL1 | Myc_targets_v1                                    | BLCA | 0.107869927  |
| UCKL1 | Myeloid cell                                      | BLCA | -0.290253494 |
| UCKL1 | N-glycan biosynthesis                             | BLCA | -0.135516675 |
| UCKL1 | Naive b cell                                      | BLCA | -0.0974134   |
| UCKL1 | Naive cd4+ t cell                                 | BLCA | -0.257477268 |
| UCKL1 | Naive cd8+ t cell                                 | BLCA | -0.132179348 |
| UCKL1 | Natural killer cell                               | BLCA | -0.238321544 |
| UCKL1 | Natural killer t (nkt) cell                       | BLCA | -0.083441613 |
| UCKL1 | Natural regulatory t (treg) cell                  | BLCA | -0.27689553  |
| UCKL1 | Neomycin, kanamycin and streptomycin              | BLCA | -0.189023571 |
| UCKL1 | Neutrophil                                        | BLCA | -0.301229694 |
| UCKL1 | Nicotinate and nicotinamide metabolism            | BLCA | -0.203743993 |
| UCKL1 | Nitrogen metabolism                               | BLCA | 0.021039988  |
| UCKL1 | Nod_like_receptor_signaling                       | BLCA | -0.301615535 |
| UCKL1 | Notch_signaling                                   | BLCA | -0.142930922 |
| UCKL1 | One carbon pool by folate                         | BLCA | 0.00079416   |
| UCKL1 | Other glycan degradation                          | BLCA | -0.013024994 |
| UCKL1 | Other types of o-glycan biosynthesis              | BLCA | 0.202461608  |
| UCKL1 | Oxidative phosphorylation                         | BLCA | 0.203052856  |
| UCKL1 | P53_pathway                                       | BLCA | -0.203088225 |
| UCKL1 | P53_signaling_pathway                             | BLCA | -0.229761789 |
| UCKL1 | Pantothenate and coenzyme a biosynthesis          | BLCA | -0.123387431 |
| UCKL1 | Pentose and glucuronate interconversions          | BLCA | 0.000388007  |
| UCKL1 | Pentose phosphate pathway                         | BLCA | 0.016456215  |
| UCKL1 | Pericyte                                          | BLCA | -0.269279135 |
| UCKL1 | Phenylalanine metabolism                          | BLCA | 0.03023726   |
| UCKL1 | Phenylalanine, tyrosine and tryptophan metabolism | BLCA | 0.081411138  |
| UCKL1 | Phosphonate and phosphite metabolism              | BLCA | 0.072560147  |
| UCKL1 | Pi3k_akt_activation                               | BLCA | -0.336165581 |
| UCKL1 | Pi3k_akt_mtor_signaling                           | BLCA | -0.321668102 |
| UCKL1 | Porphyrin and chlorophyll metabolism              | BLCA | -0.027634232 |
| UCKL1 | Primary bile acid biosynthesis                    | BLCA | -0.038286932 |
| UCKL1 | Propanoate metabolism                             | BLCA | -0.055748794 |
| UCKL1 | Purine metabolism                                 | BLCA | 0.104036433  |
| UCKL1 | Pyrimidine metabolism                             | BLCA | 0.159738226  |
| UCKL1 | Pyruvate metabolism                               | BLCA | 0.040923895  |
| UCKL1 | Regulation_of_autophagy                           | BLCA | 0.042970367  |
| UCKL1 | Retinol metabolism                                | BLCA | 0.014304302  |
| UCKL1 | Riboflavin metabolism                             | BLCA | -0.08008715  |
| UCKL1 | Schmahl_pdgf_signaling                            | BLCA | -0.286362552 |

|       |                            |      |              |
|-------|----------------------------|------|--------------|
| UCKL1 | Selenocompound metabol     | BLCA | -0.037837726 |
| UCKL1 | Signaling_by_hippo         | BLCA | -0.275594939 |
| UCKL1 | Sphingolipid metabolism    | BLCA | -0.190681994 |
| UCKL1 | Starch and sucrose metabo  | BLCA | -0.159072917 |
| UCKL1 | Steroid biosynthesis       | BLCA | 0.017523935  |
| UCKL1 | Steroid hormone biosynth   | BLCA | 0.020347239  |
| UCKL1 | Sulfur metabolism          | BLCA | -0.078253558 |
| UCKL1 | Synthesis and degradation  | BLCA | 0.118783431  |
| UCKL1 | T helper cell              | BLCA | -0.260309695 |
| UCKL1 | T helper1 (th1) cell       | BLCA | -0.2389961   |
| UCKL1 | T helper17 (th17) cell     | BLCA | -0.240299967 |
| UCKL1 | T helper2 (th2) cell       | BLCA | -0.213425323 |
| UCKL1 | T helper9 (th9) cell       | BLCA | -0.182596949 |
| UCKL1 | Taurine and hypotaurine r  | BLCA | 0.239751301  |
| UCKL1 | Terpenoid backbone biosy   | BLCA | 0.042244949  |
| UCKL1 | Tgf_beta_signaling_pathw   | BLCA | -0.280624601 |
| UCKL1 | Thiamine metabolism        | BLCA | 0.09585577   |
| UCKL1 | Tnfa_signaling_via_nfbk    | BLCA | -0.320148943 |
| UCKL1 | Tryptophan metabolism      | BLCA | -0.091488641 |
| UCKL1 | Tumor endothelial cell     | BLCA | 0.045685122  |
| UCKL1 | Tyrosine metabolism        | BLCA | 0.037719394  |
| UCKL1 | Ubiquinone and other ter   | BLCA | 0.140044012  |
| UCKL1 | Valine, leucine and isoleu | BLCA | -0.110307056 |
| UCKL1 | Valine, leucine and isoleu | BLCA | -0.003934582 |
| UCKL1 | Vascular endothelial cell  | BLCA | -0.248792129 |
| UCKL1 | Vascular smooth muscle c   | BLCA | -0.173925069 |
| UCKL1 | Vegf_signaling_pathway     | BLCA | -0.218923572 |
| UCKL1 | Vitamin b6 metabolism      | BLCA | 0.04294317   |
| UCKL1 | Willert_wnt_signaling      | BLCA | 0.060126659  |
| UCKL1 | Wnt_beta_catenin_signali   | BLCA | -0.10493955  |
| UPP1  | Abnormal plasma cell       | BLCA | 0.170571544  |
| UPP1  | Activated b cell           | BLCA | 0.276488306  |
| UPP1  | Activated cd4+ t cell      | BLCA | 0.298299804  |
| UPP1  | Activated t cell           | BLCA | 0.308075748  |
| UPP1  | Alanine, aspartate and glu | BLCA | -0.150953079 |
| UPP1  | Alcala_apoptosis           | BLCA | 0.321872605  |
| UPP1  | Alpha-linolenic acid meta  | BLCA | -0.050928462 |
| UPP1  | Amino sugar and nucleoti   | BLCA | 0.38336397   |
| UPP1  | Ampk_pathway               | BLCA | -0.163269492 |
| UPP1  | Angiogenesis               | BLCA | 0.273985302  |
| UPP1  | Arachidonic acid metabo    | BLCA | 0.157092529  |
| UPP1  | Arginine and proline met   | BLCA | 0.110476731  |
| UPP1  | Arginine biosynthesis      | BLCA | -0.037898226 |

|      |                             |      |              |
|------|-----------------------------|------|--------------|
| UPP1 | Ascorbate and aldarate me   | BLCA | -0.174816833 |
| UPP1 | Atypical memory b cell      | BLCA | 0.189045929  |
| UPP1 | Axl+siglec6+ dendritic ce   | BLCA | 0.287354314  |
| UPP1 | B cell                      | BLCA | 0.243363574  |
| UPP1 | B1 cell                     | BLCA | 0.191552976  |
| UPP1 | Basal cell                  | BLCA | 0.208725517  |
| UPP1 | Beta-alanine metabolism     | BLCA | 0.024704275  |
| UPP1 | Biosynthesis of unsaturate  | BLCA | 0.051457649  |
| UPP1 | Biotin metabolism           | BLCA | -0.135115793 |
| UPP1 | Butanoate metabolism        | BLCA | -0.15655133  |
| UPP1 | Caffeine metabolism         | BLCA | 0.078820219  |
| UPP1 | Cancer stem cell            | BLCA | 0.263039616  |
| UPP1 | Cancer stem-like cell       | BLCA | 0.093793575  |
| UPP1 | Cd4+ cytotoxic t cell       | BLCA | 0.348453047  |
| UPP1 | Cd4+ memory t cell          | BLCA | 0.166790814  |
| UPP1 | Cd4+ regulatory t cell      | BLCA | 0.269477962  |
| UPP1 | Cd4+ t helper cell          | BLCA | 0.270006344  |
| UPP1 | Cd4+cd25+ regulatory t c    | BLCA | 0.281980544  |
| UPP1 | Cd8+ cytotoxic t cell       | BLCA | 0.311360839  |
| UPP1 | Cd8+ regulatory t cell      | BLCA | 0.271313134  |
| UPP1 | Cell_cycle                  | BLCA | 0.038695162  |
| UPP1 | Chandran_metastasis_top5    | BLCA | -0.198183875 |
| UPP1 | Citrate cycle (tca cycle)   | BLCA | 0.031887371  |
| UPP1 | Cysteine and methionine r   | BLCA | 0.024517915  |
| UPP1 | Cytokine induced killer c   | BLCA | 0.230143501  |
| UPP1 | D-arginine and d-ornithin   | BLCA | 0.090075773  |
| UPP1 | D-glutamine and d-glutan    | BLCA | -0.218431456 |
| UPP1 | Dendritic cell              | BLCA | 0.340942856  |
| UPP1 | Dna_repair                  | BLCA | 0.138780048  |
| UPP1 | Dna_replication             | BLCA | 0.151460298  |
| UPP1 | Double-negative memory      | BLCA | 0.232499671  |
| UPP1 | Drug metabolism - cytoch    | BLCA | -0.087045736 |
| UPP1 | Drug metabolism - other     | BLCA | 0.197525548  |
| UPP1 | E2f_targets                 | BLCA | 0.062276241  |
| UPP1 | Ecm_receptor_interaction    | BLCA | 0.24323667   |
| UPP1 | Effector cd4+ memory t (    | BLCA | 0.127467219  |
| UPP1 | Effector cd8+ memory t (    | BLCA | 0.368152201  |
| UPP1 | Effector memory t cell      | BLCA | 0.220978521  |
| UPP1 | Effector regulatory t (treg | BLCA | 0.271626271  |
| UPP1 | Elvidge_hif1a_targets_up    | BLCA | 0.149798745  |
| UPP1 | Endothelial cell            | BLCA | 0.245622751  |
| UPP1 | Eosinophil                  | BLCA | 0.373685068  |
| UPP1 | Ether lipid metabolism      | BLCA | -0.073720737 |

|      |                              |      |              |
|------|------------------------------|------|--------------|
| UPP1 | Exhausted cd4+ t cell        | BLCA | 0.305742061  |
| UPP1 | Exhausted cd8+ t cell        | BLCA | 0.310400653  |
| UPP1 | Exhausted t cell             | BLCA | 0.29135073   |
| UPP1 | Fat cell (adipocyte)         | BLCA | 0.092310749  |
| UPP1 | Fatty acid biosynthesis      | BLCA | -0.13568649  |
| UPP1 | Fatty acid degradation       | BLCA | -0.187029556 |
| UPP1 | Fatty acid elongation        | BLCA | 0.160376974  |
| UPP1 | Fibroblast                   | BLCA | 0.277192375  |
| UPP1 | Folate biosynthesis          | BLCA | 0.076166889  |
| UPP1 | Follicular b cell            | BLCA | 0.230345752  |
| UPP1 | Follicular dendritic cell    | BLCA | 0.203678307  |
| UPP1 | Follicular helper (tfh) t ce | BLCA | 0.31267449   |
| UPP1 | Follicular t cell            | BLCA | 0.266748099  |
| UPP1 | Foxp3+il-17+ t cell          | BLCA | 0.157463241  |
| UPP1 | Fructose and mannose me      | BLCA | 0.195721419  |
| UPP1 | G2m_checkpoint               | BLCA | 0.013929174  |
| UPP1 | Galactose metabolism         | BLCA | 0.324665208  |
| UPP1 | Galie_tumor_stemness_ge      | BLCA | 0.101046462  |
| UPP1 | Glutathione metabolism       | BLCA | 0.166476505  |
| UPP1 | Glycerolipid metabolism      | BLCA | -0.079024664 |
| UPP1 | Glycerophospholipid metæ     | BLCA | -0.076488645 |
| UPP1 | Glycine, serine and threor   | BLCA | 0.098321184  |
| UPP1 | Glycolysis / gluconeogene    | BLCA | 0.083241174  |
| UPP1 | Glycosaminoglycan biosy      | BLCA | 0.299873856  |
| UPP1 | Glycosaminoglycan biosy      | BLCA | 0.012016815  |
| UPP1 | Glycosaminoglycan biosy      | BLCA | 0.239590314  |
| UPP1 | Glycosaminoglycan degra      | BLCA | 0.188729918  |
| UPP1 | Glycosphingolipid biosyn     | BLCA | 0.203024296  |
| UPP1 | Glycosphingolipid biosyn     | BLCA | 0.135604232  |
| UPP1 | Glycosphingolipid biosyn     | BLCA | 0.171394527  |
| UPP1 | Glycosylphosphatidylinos     | BLCA | -0.120648127 |
| UPP1 | Glyoxylate and dicarboxy     | BLCA | 0.039316189  |
| UPP1 | Granulocyte                  | BLCA | 0.348086305  |
| UPP1 | Hedgehog_signaling           | BLCA | 0.008321034  |
| UPP1 | Histidine metabolism         | BLCA | 0.052916138  |
| UPP1 | Hypoxia                      | BLCA | 0.298395153  |
| UPP1 | Il-17ralpha t cell           | BLCA | 0.284286307  |
| UPP1 | Il2_stat5_signaling          | BLCA | 0.389159556  |
| UPP1 | Il6_jak_stat3_signaling      | BLCA | 0.397841723  |
| UPP1 | Immune_checkpoints_tur       | BLCA | 0.306850369  |
| UPP1 | Immune_inhibition_cytok      | BLCA | 0.441747499  |
| UPP1 | Inositol phosphate metabo    | BLCA | -0.263004296 |
| UPP1 | Interleukin_6_signaling      | BLCA | 0.159001045  |



|      |                             |      |              |
|------|-----------------------------|------|--------------|
| Upp1 | Jaeger_metastasis_up        | BLCA | 0.226939355  |
| Upp1 | Jain_nfkb_signaling         | BLCA | 0.002780486  |
| Upp1 | Kras_signaling_up           | BLCA | 0.305286472  |
| Upp1 | Linoleic acid metabolism    | BLCA | -0.116930454 |
| Upp1 | Lipoic acid metabolism      | BLCA | -0.135574403 |
| Upp1 | Lysine degradation          | BLCA | -0.240267261 |
| Upp1 | Lysosome                    | BLCA | 0.213786198  |
| Upp1 | M1 macrophage               | BLCA | 0.354651783  |
| Upp1 | M2 macrophage               | BLCA | 0.42235676   |
| Upp1 | Mannose type o-glycan bi    | BLCA | -0.003929473 |
| Upp1 | Mapk_signaling_pathway      | BLCA | 0.187312521  |
| Upp1 | Mapk3_erk1_activation       | BLCA | 0.109096134  |
| Upp1 | Marginal zone b cell        | BLCA | 0.188653681  |
| Upp1 | Memory b cell               | BLCA | 0.225230302  |
| Upp1 | Mesenchymal cell            | BLCA | 0.263660856  |
| Upp1 | Mesenchymal stem cell       | BLCA | 0.28331599   |
| Upp1 | Metabolism of xenobiotic    | BLCA | -0.045213    |
| Upp1 | Migrating cancer stem cel   | BLCA | 0.129833872  |
| Upp1 | Mitotic_spindle             | BLCA | -0.061458151 |
| Upp1 | Monocyte                    | BLCA | 0.441238623  |
| Upp1 | Mtor_signaling_pathway      | BLCA | -0.079279695 |
| Upp1 | Mtorc1_signaling            | BLCA | 0.262245037  |
| Upp1 | Mucin type o-glycan biosy   | BLCA | 0.050513022  |
| Upp1 | Myc_targets_v1              | BLCA | 0.116407795  |
| Upp1 | Myeloid cell                | BLCA | 0.329818705  |
| Upp1 | N-glycan biosynthesis       | BLCA | 0.065453534  |
| Upp1 | Naive b cell                | BLCA | 0.238889617  |
| Upp1 | Naive cd4+ t cell           | BLCA | 0.101215995  |
| Upp1 | Naive cd8+ t cell           | BLCA | -0.010933485 |
| Upp1 | Natural killer cell         | BLCA | 0.320091971  |
| Upp1 | Natural killer t (nkt) cell | BLCA | 0.211133309  |
| Upp1 | Natural regulatory t (treg) | BLCA | 0.249944917  |
| Upp1 | Neomycin, kanamycin an      | BLCA | 0.248002513  |
| Upp1 | Neutrophil                  | BLCA | 0.453535351  |
| Upp1 | Nicotinate and nicotinami   | BLCA | 0.207414178  |
| Upp1 | Nitrogen metabolism         | BLCA | -0.03624793  |
| Upp1 | Nod_like_receptor_signal    | BLCA | 0.361004128  |
| Upp1 | Notch_signaling             | BLCA | 0.094723821  |
| Upp1 | One carbon pool by folate   | BLCA | -0.025781871 |
| Upp1 | Other glycan degradation    | BLCA | 0.037818144  |
| Upp1 | Other types of o-glycan b   | BLCA | 0.157668403  |
| Upp1 | Oxidative phosphorylatior   | BLCA | 0.193631847  |
| Upp1 | P53_pathway                 | BLCA | 0.282684127  |

|      |                            |      |              |
|------|----------------------------|------|--------------|
| UPP1 | P53_signaling_pathway      | BLCA | -0.030372257 |
| UPP1 | Pantothenate and coa bios  | BLCA | 0.286525725  |
| UPP1 | Pentose and glucuronate i  | BLCA | -0.101588674 |
| UPP1 | Pentose phosphate pathwa   | BLCA | 0.23955601   |
| UPP1 | Pericyte                   | BLCA | 0.261104933  |
| UPP1 | Phenylalanine metabolism   | BLCA | 0.168675439  |
| UPP1 | Phenylalanine, tyrosine ar | BLCA | 0.124041628  |
| UPP1 | Phosphonate and phosphir   | BLCA | -0.134718932 |
| UPP1 | Pi3k_akt_activation        | BLCA | -0.058738524 |
| UPP1 | Pi3k_akt_mtor_signaling    | BLCA | 0.190616473  |
| UPP1 | Porphyrin and chlorophyl   | BLCA | 0.051803265  |
| UPP1 | Primary bile acid biosynt  | BLCA | 0.031305937  |
| UPP1 | Propanoate metabolism      | BLCA | -0.256060498 |
| UPP1 | Purine metabolism          | BLCA | 0.172668567  |
| UPP1 | Pyrimidine metabolism      | BLCA | 0.227331217  |
| UPP1 | Pyruvate metabolism        | BLCA | 0.019047123  |
| UPP1 | Regulation_of_autophagy    | BLCA | 0.017328396  |
| UPP1 | Retinol metabolism         | BLCA | -0.108287917 |
| UPP1 | Riboflavin metabolism      | BLCA | 0.373426506  |
| UPP1 | Schmahl_pdgf_signaling     | BLCA | -0.066612887 |
| UPP1 | Selenocompound metabol     | BLCA | -0.13390455  |
| UPP1 | Signaling_by_hippo         | BLCA | -0.05957663  |
| UPP1 | Sphingolipid metabolism    | BLCA | 0.056942431  |
| UPP1 | Starch and sucrose metabo  | BLCA | 0.188984735  |
| UPP1 | Steroid biosynthesis       | BLCA | 0.111571477  |
| UPP1 | Steroid hormone biosynth   | BLCA | -0.064280076 |
| UPP1 | Sulfur metabolism          | BLCA | -0.121953686 |
| UPP1 | Synthesis and degradation  | BLCA | -0.073054744 |
| UPP1 | T helper cell              | BLCA | 0.310473705  |
| UPP1 | T helper1 (th1) cell       | BLCA | 0.36233708   |
| UPP1 | T helper17 (th17) cell     | BLCA | 0.393674205  |
| UPP1 | T helper2 (th2) cell       | BLCA | 0.31931496   |
| UPP1 | T helper9 (th9) cell       | BLCA | 0.277835651  |
| UPP1 | Taurine and hypotaurine r  | BLCA | -0.122644845 |
| UPP1 | Terpenoid backbone biosy   | BLCA | 0.058314653  |
| UPP1 | Tgf_beta_signaling_pathw   | BLCA | -0.173760032 |
| UPP1 | Thiamine metabolism        | BLCA | 0.170109926  |
| UPP1 | Tnfa_signaling_via_nfk     | BLCA | 0.390243755  |
| UPP1 | Tryptophan metabolism      | BLCA | 0.158610908  |
| UPP1 | Tumor endothelial cell     | BLCA | 0.190201747  |
| UPP1 | Tyrosine metabolism        | BLCA | 0.05256352   |
| UPP1 | Ubiquinone and other ter   | BLCA | 0.088505045  |
| UPP1 | Valine, leucine and isoleu | BLCA | 0.299246903  |

|      |                            |      |              |
|------|----------------------------|------|--------------|
| UPP1 | Valine, leucine and isoleu | BLCA | -0.22209194  |
| UPP1 | Vascular endothelial cell  | BLCA | 0.265967607  |
| UPP1 | Vascular smooth muscle c   | BLCA | 0.165347232  |
| UPP1 | Vegf_signaling_pathway     | BLCA | 0.130803805  |
| UPP1 | Vitamin b6 metabolism      | BLCA | 0.169747299  |
| UPP1 | Willert_wnt_signaling      | BLCA | -0.019473888 |
| UPP1 | Wnt_beta_catenin_signali   | BLCA | -0.081054311 |
| UPP2 | Abnormal plasma cell       | BLCA | -0.05987762  |
| UPP2 | Activated b cell           | BLCA | -0.119517752 |
| UPP2 | Activated cd4+ t cell      | BLCA | -0.130125725 |
| UPP2 | Activated t cell           | BLCA | -0.131412141 |
| UPP2 | Alanine, aspartate and glu | BLCA | -0.000762749 |
| UPP2 | Alcala_apoptosis           | BLCA | -0.224364236 |
| UPP2 | Alpha-linolenic acid meta  | BLCA | -0.031545079 |
| UPP2 | Amino sugar and nucleoti   | BLCA | -0.174587906 |
| UPP2 | Ampk_pathway               | BLCA | 0.045035553  |
| UPP2 | Angiogenesis               | BLCA | -0.106666441 |
| UPP2 | Arachidonic acid metabol   | BLCA | -0.036028898 |
| UPP2 | Arginine and proline metε  | BLCA | -0.187132134 |
| UPP2 | Arginine biosynthesis      | BLCA | -0.016049146 |
| UPP2 | Ascorbate and aldarate mε  | BLCA | 0.024824017  |
| UPP2 | Atypical memory b cell     | BLCA | -0.121089617 |
| UPP2 | Axl+siglec6+ dendritic ce  | BLCA | -0.119541297 |
| UPP2 | B cell                     | BLCA | -0.095466009 |
| UPP2 | B1 cell                    | BLCA | -0.094447922 |
| UPP2 | Basal cell                 | BLCA | -0.144780761 |
| UPP2 | Beta-alanine metabolism    | BLCA | -0.098202623 |
| UPP2 | Biosynthesis of unsaturate | BLCA | -0.104569786 |
| UPP2 | Biotin metabolism          | BLCA | 0.031310884  |
| UPP2 | Butanoate metabolism       | BLCA | -0.033560749 |
| UPP2 | Caffeine metabolism        | BLCA | 0.0382994    |
| UPP2 | Cancer stem cell           | BLCA | -0.079793785 |
| UPP2 | Cancer stem-like cell      | BLCA | 0.060460435  |
| UPP2 | Cd4+ cytotoxic t cell      | BLCA | -0.121911636 |
| UPP2 | Cd4+ memory t cell         | BLCA | -0.16707598  |
| UPP2 | Cd4+ regulatory t cell     | BLCA | -0.089565638 |
| UPP2 | Cd4+ t helper cell         | BLCA | -0.106895298 |
| UPP2 | Cd4+cd25+ regulatory t c   | BLCA | -0.113907368 |
| UPP2 | Cd8+ cytotoxic t cell      | BLCA | -0.126990482 |
| UPP2 | Cd8+ regulatory t cell     | BLCA | -0.145351951 |
| UPP2 | Cell_cycle                 | BLCA | -0.201320189 |
| UPP2 | Chandran_metastasis_topε   | BLCA | -0.087811896 |
| UPP2 | Citrate cycle (tca cycle)  | BLCA | -0.17662847  |

|      |                             |      |              |
|------|-----------------------------|------|--------------|
| UPP2 | Cysteine and methionine r   | BLCA | -0.116620296 |
| UPP2 | Cytokine induced killer c   | BLCA | -0.088098174 |
| UPP2 | D-arginine and d-ornithin   | BLCA | -0.009119498 |
| UPP2 | D-glutamine and d-glutan    | BLCA | -0.065535617 |
| UPP2 | Dendritic cell              | BLCA | -0.129423394 |
| UPP2 | Dna_repair                  | BLCA | -0.184590094 |
| UPP2 | Dna_replication             | BLCA | -0.187963556 |
| UPP2 | Double-negative memory      | BLCA | -0.10038872  |
| UPP2 | Drug metabolism - cytoch    | BLCA | 0.0431056    |
| UPP2 | Drug metabolism - other c   | BLCA | -0.071272087 |
| UPP2 | E2f_targets                 | BLCA | -0.185111881 |
| UPP2 | Ecm_receptor_interaction    | BLCA | -0.08002869  |
| UPP2 | Effector cd4+ memory t (    | BLCA | -0.162639926 |
| UPP2 | Effector cd8+ memory t (    | BLCA | -0.117618208 |
| UPP2 | Effector memory t cell      | BLCA | -0.152463833 |
| UPP2 | Effector regulatory t (treg | BLCA | -0.100174537 |
| UPP2 | Elvidge_hif1a_targets_up    | BLCA | -0.255309789 |
| UPP2 | Endothelial cell            | BLCA | -0.09933616  |
| UPP2 | Eosinophil                  | BLCA | -0.145966753 |
| UPP2 | Ether lipid metabolism      | BLCA | 0.014437588  |
| UPP2 | Exhausted cd4+ t cell       | BLCA | -0.156309209 |
| UPP2 | Exhausted cd8+ t cell       | BLCA | -0.140446721 |
| UPP2 | Exhausted t cell            | BLCA | -0.118204848 |
| UPP2 | Fat cell (adipocyte)        | BLCA | -0.040958049 |
| UPP2 | Fatty acid biosynthesis     | BLCA | 0.024203449  |
| UPP2 | Fatty acid degradation      | BLCA | -0.004124896 |
| UPP2 | Fatty acid elongation       | BLCA | -0.121261939 |
| UPP2 | Fibroblast                  | BLCA | -0.11010771  |
| UPP2 | Folate biosynthesis         | BLCA | -0.070400839 |
| UPP2 | Follicular b cell           | BLCA | -0.103060932 |
| UPP2 | Follicular dendritic cell   | BLCA | -0.102142547 |
| UPP2 | Follicular helper (tfh) t c | BLCA | -0.129005959 |
| UPP2 | Follicular t cell           | BLCA | -0.128372313 |
| UPP2 | Foxp3+il-17+ t cell         | BLCA | -0.083545212 |
| UPP2 | Fructose and mannose me     | BLCA | -0.096017667 |
| UPP2 | G2m_checkpoint              | BLCA | -0.187103863 |
| UPP2 | Galactose metabolism        | BLCA | -0.168631974 |
| UPP2 | Galie_tumor_stemness_ge     | BLCA | -0.059210036 |
| UPP2 | Glutathione metabolism      | BLCA | -0.120779591 |
| UPP2 | Glycerolipid metabolism     | BLCA | 0.095409844  |
| UPP2 | Glycerophospholipid met     | BLCA | 0.094037873  |
| UPP2 | Glycine, serine and threor  | BLCA | -0.081454235 |
| UPP2 | Glycolysis / gluconeogene   | BLCA | -0.087002646 |

|      |                           |      |              |
|------|---------------------------|------|--------------|
| UPP2 | Glycosaminoglycan biosyn  | BLCA | -0.068879004 |
| UPP2 | Glycosaminoglycan biosyn  | BLCA | 0.01300028   |
| UPP2 | Glycosaminoglycan biosyn  | BLCA | -0.083881956 |
| UPP2 | Glycosaminoglycan degra   | BLCA | 0.043291802  |
| UPP2 | Glycosphingolipid biosyn  | BLCA | -0.028643197 |
| UPP2 | Glycosphingolipid biosyn  | BLCA | -0.066204205 |
| UPP2 | Glycosphingolipid biosyn  | BLCA | -0.002151953 |
| UPP2 | Glycosylphosphatidylinos  | BLCA | 0.017387797  |
| UPP2 | Glyoxylate and dicarboxy  | BLCA | -0.088628542 |
| UPP2 | Granulocyte               | BLCA | -0.132452819 |
| UPP2 | Hedgehog_signaling        | BLCA | 0.03051618   |
| UPP2 | Histidine metabolism      | BLCA | -0.04946836  |
| UPP2 | Hypoxia                   | BLCA | -0.109009789 |
| UPP2 | Il-17alpha t cell         | BLCA | -0.135127696 |
| UPP2 | Il2_stat5_signaling       | BLCA | -0.136143734 |
| UPP2 | Il6_jak_stat3_signaling   | BLCA | -0.149089121 |
| UPP2 | Immune_checkpoints_tun    | BLCA | -0.104824154 |
| UPP2 | Immune_inhibition_cytok   | BLCA | -0.130408113 |
| UPP2 | Inositol phosphate metabo | BLCA | 0.038782164  |
| UPP2 | Interleukin_6_signaling   | BLCA | -0.093074589 |
| UPP2 | Jaeger_metastasis_up      | BLCA | -0.150441465 |
| UPP2 | Jain_nfkb_signaling       | BLCA | -0.127201253 |
| UPP2 | Kras_signaling_up         | BLCA | -0.081006244 |
| UPP2 | Linoleic acid metabolism  | BLCA | 0.064798503  |
| UPP2 | Lipoic acid metabolism    | BLCA | 0.056740654  |
| UPP2 | Lysine degradation        | BLCA | -0.029415319 |
| UPP2 | Lysosome                  | BLCA | -0.074821515 |
| UPP2 | M1 macrophage             | BLCA | -0.15916449  |
| UPP2 | M2 macrophage             | BLCA | -0.15386045  |
| UPP2 | Mannose type o-glycan bi  | BLCA | 0.064328951  |
| UPP2 | Mapk_signaling_pathway    | BLCA | -0.093068586 |
| UPP2 | Mapk3_erk1_activation     | BLCA | -0.111153549 |
| UPP2 | Marginal zone b cell      | BLCA | -0.120542246 |
| UPP2 | Memory b cell             | BLCA | -0.08297923  |
| UPP2 | Mesenchymal cell          | BLCA | -0.099777363 |
| UPP2 | Mesenchymal stem cell     | BLCA | -0.094429734 |
| UPP2 | Metabolism of xenobiotic  | BLCA | 0.004286116  |
| UPP2 | Migrating cancer stem cel | BLCA | -0.049417977 |
| UPP2 | Mitotic_spindle           | BLCA | -0.109619207 |
| UPP2 | Monocyte                  | BLCA | -0.156393575 |
| UPP2 | Mtor_signaling_pathway    | BLCA | 0.028537037  |
| UPP2 | Mtorc1_signaling          | BLCA | -0.246187213 |
| UPP2 | Mucin type o-glycan bios  | BLCA | -0.058095626 |

|      |                             |      |              |
|------|-----------------------------|------|--------------|
| UPP2 | Myc_targets_v1              | BLCA | -0.231379619 |
| UPP2 | Myeloid cell                | BLCA | -0.127742899 |
| UPP2 | N-glycan biosynthesis       | BLCA | -0.149075873 |
| UPP2 | Naive b cell                | BLCA | -0.1126281   |
| UPP2 | Naive cd4+ t cell           | BLCA | -0.117089862 |
| UPP2 | Naive cd8+ t cell           | BLCA | -0.045442086 |
| UPP2 | Natural killer cell         | BLCA | -0.124829024 |
| UPP2 | Natural killer t (nkt) cell | BLCA | -0.166157546 |
| UPP2 | Natural regulatory t (treg) | BLCA | -0.107863944 |
| UPP2 | Neomycin, kanamycin and     | BLCA | -0.166724498 |
| UPP2 | Neutrophil                  | BLCA | -0.162653504 |
| UPP2 | Nicotinate and nicotinami   | BLCA | -0.011087842 |
| UPP2 | Nitrogen metabolism         | BLCA | 0.126961137  |
| UPP2 | Nod_like_receptor_signal    | BLCA | -0.160141001 |
| UPP2 | Notch_signaling             | BLCA | -0.107558233 |
| UPP2 | One carbon pool by folate   | BLCA | -0.136531874 |
| UPP2 | Other glycan degradation    | BLCA | 0.100492056  |
| UPP2 | Other types of o-glycan b   | BLCA | 0.048514835  |
| UPP2 | Oxidative phosphorylatio    | BLCA | -0.098732319 |
| UPP2 | P53_pathway                 | BLCA | -0.142076797 |
| UPP2 | P53_signaling_pathway       | BLCA | -0.18966794  |
| UPP2 | Pantothenate and coa bios   | BLCA | -0.069904007 |
| UPP2 | Pentose and glucuronate i   | BLCA | 0.032464352  |
| UPP2 | Pentose phosphate pathwa    | BLCA | -0.129130316 |
| UPP2 | Pericyte                    | BLCA | -0.076249905 |
| UPP2 | Phenylalanine metabolism    | BLCA | -0.084832521 |
| UPP2 | Phenylalanine, tyrosine ar  | BLCA | -0.003391327 |
| UPP2 | Phosphonate and phosphir    | BLCA | 0.025496626  |
| UPP2 | Pi3k_akt_activation         | BLCA | -0.049146018 |
| UPP2 | Pi3k_akt_mtor_signaling     | BLCA | -0.221104464 |
| UPP2 | Porphyrin and chlorophyl    | BLCA | -0.063880376 |
| UPP2 | Primary bile acid biosynt   | BLCA | 0.156109538  |
| UPP2 | Propanoate metabolism       | BLCA | 0.010562981  |
| UPP2 | Purine metabolism           | BLCA | -0.181154744 |
| UPP2 | Pyrimidine metabolism       | BLCA | -0.194824258 |
| UPP2 | Pyruvate metabolism         | BLCA | -0.078795253 |
| UPP2 | Regulation_of_autophagy     | BLCA | 0.043537029  |
| UPP2 | Retinol metabolism          | BLCA | 0.036425268  |
| UPP2 | Riboflavin metabolism       | BLCA | -0.076386121 |
| UPP2 | Schmahl_pdgf_signaling      | BLCA | -0.051231012 |
| UPP2 | Selenocompound metabol      | BLCA | 0.035926865  |
| UPP2 | Signaling_by_hippo          | BLCA | -0.038110172 |
| UPP2 | Sphingolipid metabolism     | BLCA | -0.065490871 |

|      |                            |      |              |
|------|----------------------------|------|--------------|
| UPP2 | Starch and sucrose metabo  | BLCA | 0.041739305  |
| UPP2 | Steroid biosynthesis       | BLCA | -0.043959988 |
| UPP2 | Steroid hormone biosynth   | BLCA | 0.037242843  |
| UPP2 | Sulfur metabolism          | BLCA | -0.064257546 |
| UPP2 | Synthesis and degradation  | BLCA | 0.033739459  |
| UPP2 | T helper cell              | BLCA | -0.140493555 |
| UPP2 | T helper1 (th1) cell       | BLCA | -0.127843205 |
| UPP2 | T helper17 (th17) cell     | BLCA | -0.113908593 |
| UPP2 | T helper2 (th2) cell       | BLCA | -0.111062924 |
| UPP2 | T helper9 (th9) cell       | BLCA | -0.101684637 |
| UPP2 | Taurine and hypotaurine r  | BLCA | 0.246250069  |
| UPP2 | Terpenoid backbone biosy   | BLCA | -0.074762572 |
| UPP2 | Tgf_beta_signaling_pathw   | BLCA | -0.000901103 |
| UPP2 | Thiamine metabolism        | BLCA | -0.068247949 |
| UPP2 | Tnfa_signaling_via_nfk     | BLCA | -0.150344601 |
| UPP2 | Tryptophan metabolism      | BLCA | -0.112434676 |
| UPP2 | Tumor endothelial cell     | BLCA | -0.153606408 |
| UPP2 | Tyrosine metabolism        | BLCA | -0.034047243 |
| UPP2 | Ubiquinone and other ter   | BLCA | -0.106736869 |
| UPP2 | Valine, leucine and isoleu | BLCA | -0.173527981 |
| UPP2 | Valine, leucine and isoleu | BLCA | -0.026095198 |
| UPP2 | Vascular endothelial cell  | BLCA | -0.077291268 |
| UPP2 | Vascular smooth muscle c   | BLCA | -0.03959207  |
| UPP2 | Vegf_signaling_pathway     | BLCA | -0.119869663 |
| UPP2 | Vitamin b6 metabolism      | BLCA | -0.018205821 |
| UPP2 | Willert_wnt_signaling      | BLCA | -0.052138255 |
| UPP2 | Wnt_beta_catenin_signali   | BLCA | 0.033689911  |
| CDA  | Abnormal plasma cell       | BRCA | 0.035055302  |
| CDA  | Activated b cell           | BRCA | 0.100047651  |
| CDA  | Activated cd4+ t cell      | BRCA | 0.0792184    |
| CDA  | Activated t cell           | BRCA | 0.096270327  |
| CDA  | Alanine, aspartate and glu | BRCA | -0.226356013 |
| CDA  | Alcala_apoptosis           | BRCA | 0.049681385  |
| CDA  | Alpha-linolenic acid meta  | BRCA | 0.221655121  |
| CDA  | Amino sugar and nucleoti   | BRCA | -0.004170179 |
| CDA  | Ampk_pathway               | BRCA | -0.302394499 |
| CDA  | Angiogenesis               | BRCA | 0.249252334  |
| CDA  | Arachidonic acid metaboli  | BRCA | 0.409646851  |
| CDA  | Arginine and proline met   | BRCA | 0.065121717  |
| CDA  | Arginine biosynthesis      | BRCA | -0.004715721 |
| CDA  | Ascorbate and aldarate m   | BRCA | -0.053998143 |
| CDA  | Atypical memory b cell     | BRCA | 0.125832767  |
| CDA  | Axl+siglec6+ dendritic ce  | BRCA | 0.261726203  |

|     |                             |      |              |
|-----|-----------------------------|------|--------------|
| CDA | B cell                      | BRCA | 0.119767865  |
| CDA | B1 cell                     | BRCA | 0.123194694  |
| CDA | Basal cell                  | BRCA | 0.333793788  |
| CDA | Beta-alanine metabolism     | BRCA | 0.088112208  |
| CDA | Biosynthesis of unsaturate  | BRCA | -0.060160567 |
| CDA | Biotin metabolism           | BRCA | -0.114444517 |
| CDA | Butanoate metabolism        | BRCA | -0.070456342 |
| CDA | Caffeine metabolism         | BRCA | 0.091948394  |
| CDA | Cancer stem cell            | BRCA | 0.223761037  |
| CDA | Cancer stem-like cell       | BRCA | 0.162477995  |
| CDA | Cd4+ cytotoxic t cell       | BRCA | 0.221988964  |
| CDA | Cd4+ memory t cell          | BRCA | 0.086545399  |
| CDA | Cd4+ regulatory t cell      | BRCA | 0.076155242  |
| CDA | Cd4+ t helper cell          | BRCA | 0.120182619  |
| CDA | Cd4+cd25+ regulatory t c    | BRCA | 0.106428141  |
| CDA | Cd8+ cytotoxic t cell       | BRCA | 0.135003462  |
| CDA | Cd8+ regulatory t cell      | BRCA | 0.054499521  |
| CDA | Cell_cycle                  | BRCA | -0.281131927 |
| CDA | Chandran_metastasis_top     | BRCA | -0.404850378 |
| CDA | Citrate cycle (tca cycle)   | BRCA | -0.082168478 |
| CDA | Cysteine and methionine r   | BRCA | -0.150835214 |
| CDA | Cytokine induced killer c   | BRCA | 0.128478766  |
| CDA | D-arginine and d-ornithin   | BRCA | 0.040838627  |
| CDA | D-glutamine and d-glutan    | BRCA | -0.200022956 |
| CDA | Dendritic cell              | BRCA | 0.203168492  |
| CDA | Dna_repair                  | BRCA | 0.001327085  |
| CDA | Dna_replication             | BRCA | -0.164049803 |
| CDA | Double-negative memory      | BRCA | 0.121392331  |
| CDA | Drug metabolism - cytoch    | BRCA | 0.204118889  |
| CDA | Drug metabolism - other     | BRCA | 0.146190551  |
| CDA | E2f_targets                 | BRCA | -0.272849933 |
| CDA | Ecm_receptor_interaction    | BRCA | 0.170728009  |
| CDA | Effector cd4+ memory t      | BRCA | 0.063586026  |
| CDA | Effector cd8+ memory t      | BRCA | 0.158134721  |
| CDA | Effector memory t cell      | BRCA | 0.102342602  |
| CDA | Effector regulatory t (treg | BRCA | 0.044360136  |
| CDA | Elvidge_hif1a_targets_up    | BRCA | -0.262207285 |
| CDA | Endothelial cell            | BRCA | 0.255256623  |
| CDA | Eosinophil                  | BRCA | 0.147382128  |
| CDA | Ether lipid metabolism      | BRCA | 0.204424767  |
| CDA | Exhausted cd4+ t cell       | BRCA | 0.111671246  |
| CDA | Exhausted cd8+ t cell       | BRCA | 0.169221351  |
| CDA | Exhausted t cell            | BRCA | 0.105438086  |



|     |                              |      |              |
|-----|------------------------------|------|--------------|
| CDA | Fat cell (adipocyte)         | BRCA | 0.18192475   |
| CDA | Fatty acid biosynthesis      | BRCA | -0.018446741 |
| CDA | Fatty acid degradation       | BRCA | 0.062861884  |
| CDA | Fatty acid elongation        | BRCA | 0.054442214  |
| CDA | Fibroblast                   | BRCA | 0.214764165  |
| CDA | Folate biosynthesis          | BRCA | 0.049043371  |
| CDA | Follicular b cell            | BRCA | 0.129590065  |
| CDA | Follicular dendritic cell    | BRCA | 0.066178876  |
| CDA | Follicular helper (tfh) t ce | BRCA | 0.121211516  |
| CDA | Follicular t cell            | BRCA | 0.12275131   |
| CDA | Foxp3+il-17+ t cell          | BRCA | 0.013385678  |
| CDA | Fructose and mannose me      | BRCA | -0.044787179 |
| CDA | G2m_checkpoint               | BRCA | -0.339241127 |
| CDA | Galactose metabolism         | BRCA | 0.081384638  |
| CDA | Galie_tumor_stemness_ge      | BRCA | 0.143924168  |
| CDA | Glutathione metabolism       | BRCA | 0.168643482  |
| CDA | Glycerolipid metabolism      | BRCA | 0.149076998  |
| CDA | Glycerophospholipid metæ     | BRCA | 0.242431259  |
| CDA | Glycine, serine and threor   | BRCA | 0.081893682  |
| CDA | Glycolysis / gluconeogene    | BRCA | -0.018317099 |
| CDA | Glycosaminoglycan biosy      | BRCA | 0.323595157  |
| CDA | Glycosaminoglycan biosy      | BRCA | 0.015342401  |
| CDA | Glycosaminoglycan biosy      | BRCA | 0.135179285  |
| CDA | Glycosaminoglycan degra      | BRCA | 0.244054945  |
| CDA | Glycosphingolipid biosyn     | BRCA | 0.187509924  |
| CDA | Glycosphingolipid biosyn     | BRCA | 0.169155233  |
| CDA | Glycosphingolipid biosyn     | BRCA | 0.052694698  |
| CDA | Glycosylphosphatidylinos     | BRCA | -0.108225671 |
| CDA | Glyoxylate and dicarboxy     | BRCA | -0.027547568 |
| CDA | Granulocyte                  | BRCA | 0.132256471  |
| CDA | Hedgehog_signaling           | BRCA | 0.040484065  |
| CDA | Histidine metabolism         | BRCA | 0.166988537  |
| CDA | Hypoxia                      | BRCA | 0.184091361  |
| CDA | Il-17alpha t cell            | BRCA | 0.107968928  |
| CDA | Il2_stat5_signaling          | BRCA | 0.238359115  |
| CDA | Il6_jak_stat3_signaling      | BRCA | 0.163689613  |
| CDA | Immune_checkpoints_tur       | BRCA | 0.12665351   |
| CDA | Immune_inhibition_cytok      | BRCA | 0.264478521  |
| CDA | Inositol phosphate metabo    | BRCA | -0.24896828  |
| CDA | Interleukin_6_signaling      | BRCA | -0.113586774 |
| CDA | Jaeger_metastasis_up         | BRCA | -0.158885464 |
| CDA | Jain_nfkb_signaling          | BRCA | -0.224989622 |
| CDA | Kras_signaling_up            | BRCA | 0.239750895  |

|     |                             |      |              |
|-----|-----------------------------|------|--------------|
| CDA | Linoleic acid metabolism    | BRCA | 0.221515132  |
| CDA | Lipoic acid metabolism      | BRCA | 0.036231312  |
| CDA | Lysine degradation          | BRCA | -0.271245084 |
| CDA | Lysosome                    | BRCA | 0.09403952   |
| CDA | M1 macrophage               | BRCA | 0.132516375  |
| CDA | M2 macrophage               | BRCA | 0.157220019  |
| CDA | Mannose type o-glycan bi    | BRCA | -0.027396237 |
| CDA | Mapk_signaling_pathway      | BRCA | 0.12890378   |
| CDA | Mapk3_erk1_activation       | BRCA | -0.143775844 |
| CDA | Marginal zone b cell        | BRCA | 0.084825424  |
| CDA | Memory b cell               | BRCA | 0.049419771  |
| CDA | Mesenchymal cell            | BRCA | 0.328354568  |
| CDA | Mesenchymal stem cell       | BRCA | 0.217505441  |
| CDA | Metabolism of xenobiotic    | BRCA | 0.201680835  |
| CDA | Migrating cancer stem cel   | BRCA | -0.05387611  |
| CDA | Mitotic_spindle             | BRCA | -0.33587834  |
| CDA | Monocyte                    | BRCA | 0.288650693  |
| CDA | Mtor_signaling_pathway      | BRCA | -0.133339273 |
| CDA | Mtorc1_signaling            | BRCA | -0.169020154 |
| CDA | Mucin type o-glycan biosy   | BRCA | -0.043308738 |
| CDA | Myc_targets_v1              | BRCA | -0.133425413 |
| CDA | Myeloid cell                | BRCA | 0.127613156  |
| CDA | N-glycan biosynthesis       | BRCA | -0.129541245 |
| CDA | Naive b cell                | BRCA | 0.060362471  |
| CDA | Naive cd4+ t cell           | BRCA | 0.1643688    |
| CDA | Naive cd8+ t cell           | BRCA | 0.137609837  |
| CDA | Natural killer cell         | BRCA | 0.126481919  |
| CDA | Natural killer t (nkt) cell | BRCA | 0.09917579   |
| CDA | Natural regulatory t (treg) | BRCA | 0.075759798  |
| CDA | Neomycin, kanamycin and     | BRCA | 0.034098744  |
| CDA | Neutrophil                  | BRCA | 0.230405214  |
| CDA | Nicotinate and nicotinami   | BRCA | 0.007808117  |
| CDA | Nitrogen metabolism         | BRCA | -0.048201889 |
| CDA | Nod_like_receptor_signal    | BRCA | 0.044734003  |
| CDA | Notch_signaling             | BRCA | 0.230502332  |
| CDA | One carbon pool by folate   | BRCA | -0.213297302 |
| CDA | Other glycan degradation    | BRCA | 0.055171817  |
| CDA | Other types of o-glycan b   | BRCA | 0.162788158  |
| CDA | Oxidative phosphorylatior   | BRCA | 0.188124771  |
| CDA | P53_pathway                 | BRCA | 0.362265392  |
| CDA | P53_signaling_pathway       | BRCA | -0.112657906 |
| CDA | Pantothenate and coa bios   | BRCA | -0.009741241 |
| CDA | Pentose and glucuronate in  | BRCA | -0.037319535 |

|     |                            |      |              |
|-----|----------------------------|------|--------------|
| CDA | Pentose phosphate pathwa   | BRCA | 0.013869595  |
| CDA | Pericyte                   | BRCA | 0.303017611  |
| CDA | Phenylalanine metabolism   | BRCA | 0.204732052  |
| CDA | Phenylalanine, tyrosine ar | BRCA | -0.044905066 |
| CDA | Phosphonate and phosphir   | BRCA | -0.142169104 |
| CDA | Pi3k_akt_activation        | BRCA | -0.048372805 |
| CDA | Pi3k_akt_mtor_signaling    | BRCA | -0.115705365 |
| CDA | Porphyrin and chlorophyl   | BRCA | -0.028293175 |
| CDA | Primary bile acid biosynt  | BRCA | 0.160658749  |
| CDA | Propanoate metabolism      | BRCA | -0.173118855 |
| CDA | Purine metabolism          | BRCA | -0.093391607 |
| CDA | Pyrimidine metabolism      | BRCA | -0.109399205 |
| CDA | Pyruvate metabolism        | BRCA | -0.062315684 |
| CDA | Regulation_of_autophagy    | BRCA | -0.088323435 |
| CDA | Retinol metabolism         | BRCA | 0.168359729  |
| CDA | Riboflavin metabolism      | BRCA | 0.008058042  |
| CDA | Schmahl_pdgf_signaling     | BRCA | 0.076391841  |
| CDA | Selenocompound metabol     | BRCA | -0.293949379 |
| CDA | Signaling_by_hippo         | BRCA | -0.207099113 |
| CDA | Sphingolipid metabolism    | BRCA | -0.177988602 |
| CDA | Starch and sucrose metabo  | BRCA | 0.071063716  |
| CDA | Steroid biosynthesis       | BRCA | -0.077729209 |
| CDA | Steroid hormone biosynth   | BRCA | 0.131910292  |
| CDA | Sulfur metabolism          | BRCA | -0.037500686 |
| CDA | Synthesis and degradation  | BRCA | -0.050471054 |
| CDA | T helper cell              | BRCA | 0.181806469  |
| CDA | T helper1 (th1) cell       | BRCA | 0.121222503  |
| CDA | T helper17 (th17) cell     | BRCA | 0.197382478  |
| CDA | T helper2 (th2) cell       | BRCA | 0.209172225  |
| CDA | T helper9 (th9) cell       | BRCA | 0.129822433  |
| CDA | Taurine and hypotaurine r  | BRCA | 0.145685494  |
| CDA | Terpenoid backbone biosy   | BRCA | -0.149855189 |
| CDA | Tgf_beta_signaling_pathw   | BRCA | -0.025220269 |
| CDA | Thiamine metabolism        | BRCA | 0.110678426  |
| CDA | Tnfa_signaling_via_nfkb    | BRCA | 0.212950345  |
| CDA | Tryptophan metabolism      | BRCA | 0.100965964  |
| CDA | Tumor endothelial cell     | BRCA | 0.153775646  |
| CDA | Tyrosine metabolism        | BRCA | 0.204036763  |
| CDA | Ubiquinone and other terç  | BRCA | -0.047813316 |
| CDA | Valine, leucine and isoleu | BRCA | 0.136931675  |
| CDA | Valine, leucine and isoleu | BRCA | -0.097034339 |
| CDA | Vascular endothelial cell  | BRCA | 0.418172962  |
| CDA | Vascular smooth muscle c   | BRCA | 0.25775673   |

|      |                            |      |              |
|------|----------------------------|------|--------------|
| CDA  | Vegf_signaling_pathway     | BRCA | 0.182627992  |
| CDA  | Vitamin b6 metabolism      | BRCA | -0.046470839 |
| CDA  | Willert_wnt_signaling      | BRCA | 0.022065599  |
| CDA  | Wnt_beta_catenin_signali   | BRCA | 0.175169864  |
| UCK1 | Abnormal plasma cell       | BRCA | -0.064059386 |
| UCK1 | Activated b cell           | BRCA | -0.047121962 |
| UCK1 | Activated cd4+ t cell      | BRCA | -0.103988558 |
| UCK1 | Activated t cell           | BRCA | -0.053963613 |
| UCK1 | Alanine, aspartate and glu | BRCA | -0.148221129 |
| UCK1 | Alcala_apoptosis           | BRCA | 0.131085849  |
| UCK1 | Alpha-linolenic acid meta  | BRCA | 0.245903397  |
| UCK1 | Amino sugar and nucleoti   | BRCA | 0.093573872  |
| UCK1 | Ampk_pathway               | BRCA | -0.044718801 |
| UCK1 | Angiogenesis               | BRCA | -0.118656759 |
| UCK1 | Arachidonic acid metaboli  | BRCA | 0.333879553  |
| UCK1 | Arginine and proline metε  | BRCA | 0.101689305  |
| UCK1 | Arginine biosynthesis      | BRCA | -0.02843356  |
| UCK1 | Ascorbate and aldarate mε  | BRCA | 0.015527172  |
| UCK1 | Atypical memory b cell     | BRCA | -0.045124928 |
| UCK1 | Ax1+siglec6+ dendritic ce  | BRCA | -0.05324734  |
| UCK1 | B cell                     | BRCA | -0.10930129  |
| UCK1 | B1 cell                    | BRCA | -0.006945369 |
| UCK1 | Basal cell                 | BRCA | 0.071049553  |
| UCK1 | Beta-alanine metabolism    | BRCA | 0.048830655  |
| UCK1 | Biosynthesis of unsaturate | BRCA | 0.036501084  |
| UCK1 | Biotin metabolism          | BRCA | -0.0562907   |
| UCK1 | Butanoate metabolism       | BRCA | 0.07854958   |
| UCK1 | Caffeine metabolism        | BRCA | 0.058954863  |
| UCK1 | Cancer stem cell           | BRCA | -0.21275391  |
| UCK1 | Cancer stem-like cell      | BRCA | -0.157495236 |
| UCK1 | Cd4+ cytotoxic t cell      | BRCA | -0.002528174 |
| UCK1 | Cd4+ memory t cell         | BRCA | -0.042592863 |
| UCK1 | Cd4+ regulatory t cell     | BRCA | -0.073225216 |
| UCK1 | Cd4+ t helper cell         | BRCA | -0.069275999 |
| UCK1 | Cd4+cd25+ regulatory t c   | BRCA | -0.076417749 |
| UCK1 | Cd8+ cytotoxic t cell      | BRCA | 0.013066014  |
| UCK1 | Cd8+ regulatory t cell     | BRCA | -0.059507161 |
| UCK1 | Cell_cycle                 | BRCA | -0.220585984 |
| UCK1 | Chandran_metastasis_top5   | BRCA | -0.375005838 |
| UCK1 | Citrate cycle (tca cycle)  | BRCA | -0.015857398 |
| UCK1 | Cysteine and methionine r  | BRCA | -0.089013205 |
| UCK1 | Cytokine induced killer cε | BRCA | 0.019386775  |
| UCK1 | D-arginine and d-ornithin  | BRCA | 0.017052397  |

|      |                              |      |              |
|------|------------------------------|------|--------------|
| UCK1 | D-glutamine and d-glutan     | BRCA | -0.310741009 |
| UCK1 | Dendritic cell               | BRCA | -0.129925158 |
| UCK1 | Dna_repair                   | BRCA | 0.370216138  |
| UCK1 | Dna_replication              | BRCA | 0.061395091  |
| UCK1 | Double-negative memory       | BRCA | 0.091294467  |
| UCK1 | Drug metabolism - cytoch     | BRCA | 0.117268325  |
| UCK1 | Drug metabolism - other      | BRCA | 0.280666173  |
| UCK1 | E2f_targets                  | BRCA | -0.166422798 |
| UCK1 | Ecm_receptor_interaction     | BRCA | -0.181488982 |
| UCK1 | Effector cd4+ memory t       | BRCA | -0.150111089 |
| UCK1 | Effector cd8+ memory t       | BRCA | -0.08704358  |
| UCK1 | Effector memory t cell       | BRCA | -0.09682013  |
| UCK1 | Effector regulatory t (treg  | BRCA | -0.212419505 |
| UCK1 | Elvidge_hif1a_targets_up     | BRCA | -0.358926195 |
| UCK1 | Endothelial cell             | BRCA | -0.198157223 |
| UCK1 | Eosinophil                   | BRCA | -0.094280471 |
| UCK1 | Ether lipid metabolism       | BRCA | 0.0096041    |
| UCK1 | Exhausted cd4+ t cell        | BRCA | -0.168169892 |
| UCK1 | Exhausted cd8+ t cell        | BRCA | -0.088494066 |
| UCK1 | Exhausted t cell             | BRCA | -0.023642354 |
| UCK1 | Fat cell (adipocyte)         | BRCA | 0.103585155  |
| UCK1 | Fatty acid biosynthesis      | BRCA | -0.124883224 |
| UCK1 | Fatty acid degradation       | BRCA | 0.036666462  |
| UCK1 | Fatty acid elongation        | BRCA | 0.117164138  |
| UCK1 | Fibroblast                   | BRCA | -0.196252668 |
| UCK1 | Folate biosynthesis          | BRCA | 0.139569238  |
| UCK1 | Follicular b cell            | BRCA | -0.111643613 |
| UCK1 | Follicular dendritic cell    | BRCA | -0.080473366 |
| UCK1 | Follicular helper (tfh) t ce | BRCA | -0.083588802 |
| UCK1 | Follicular t cell            | BRCA | 0.140667508  |
| UCK1 | Foxp3+il-17+ t cell          | BRCA | -0.026761364 |
| UCK1 | Fructose and mannose me      | BRCA | 0.243284447  |
| UCK1 | G2m_checkpoint               | BRCA | -0.270306689 |
| UCK1 | Galactose metabolism         | BRCA | 0.145697743  |
| UCK1 | Galie_tumor_stemness_ge      | BRCA | -0.105803646 |
| UCK1 | Glutathione metabolism       | BRCA | 0.179700161  |
| UCK1 | Glycerolipid metabolism      | BRCA | 0.116610385  |
| UCK1 | Glycerophospholipid metæ     | BRCA | 0.292689084  |
| UCK1 | Glycine, serine and threor   | BRCA | 0.286777787  |
| UCK1 | Glycolysis / gluconeogene    | BRCA | 0.044694651  |
| UCK1 | Glycosaminoglycan biosy      | BRCA | 0.18123236   |
| UCK1 | Glycosaminoglycan biosy      | BRCA | 0.013100926  |
| UCK1 | Glycosaminoglycan biosy      | BRCA | -0.012333935 |

|      |                           |      |              |
|------|---------------------------|------|--------------|
| UCK1 | Glycosaminoglycan degra   | BRCA | 0.099505435  |
| UCK1 | Glycosphingolipid biosyn  | BRCA | 0.018839099  |
| UCK1 | Glycosphingolipid biosyn  | BRCA | -0.118537814 |
| UCK1 | Glycosphingolipid biosyn  | BRCA | -0.125134364 |
| UCK1 | Glycosylphosphatidylinos  | BRCA | 0.038914765  |
| UCK1 | Glyoxylate and dicarboxy  | BRCA | 0.167209598  |
| UCK1 | Granulocyte               | BRCA | -0.137347891 |
| UCK1 | Hedgehog_signaling        | BRCA | -0.225252934 |
| UCK1 | Histidine metabolism      | BRCA | 0.055097232  |
| UCK1 | Hypoxia                   | BRCA | -0.03597747  |
| UCK1 | Il-17alpha t cell         | BRCA | -0.059482692 |
| UCK1 | Il2_stat5_signaling       | BRCA | -0.12684739  |
| UCK1 | Il6_jak_stat3_signaling   | BRCA | -0.152316173 |
| UCK1 | Immune_checkpoints_tur    | BRCA | -0.151628352 |
| UCK1 | Immune_inhibition_cytok   | BRCA | 0.035954706  |
| UCK1 | Inositol phosphate metabo | BRCA | -0.414479208 |
| UCK1 | Interleukin_6_signaling   | BRCA | -0.440108489 |
| UCK1 | Jaeger_metastasis_up      | BRCA | -0.277699275 |
| UCK1 | Jain_nfkb_signaling       | BRCA | -0.12717785  |
| UCK1 | Kras_signaling_up         | BRCA | -0.210087977 |
| UCK1 | Linoleic acid metabolism  | BRCA | 0.249250696  |
| UCK1 | Lipoic acid metabolism    | BRCA | 0.180470612  |
| UCK1 | Lysine degradation        | BRCA | -0.159079563 |
| UCK1 | Lysosome                  | BRCA | 0.038523413  |
| UCK1 | M1 macrophage             | BRCA | -0.176090876 |
| UCK1 | M2 macrophage             | BRCA | -0.113734364 |
| UCK1 | Mannose type o-glycan bi  | BRCA | 0.238016562  |
| UCK1 | Mapk_signaling_pathway    | BRCA | -0.19197532  |
| UCK1 | Mapk3_erk1_activation     | BRCA | -0.420324479 |
| UCK1 | Marginal zone b cell      | BRCA | -0.174817395 |
| UCK1 | Memory b cell             | BRCA | -0.17126764  |
| UCK1 | Mesenchymal cell          | BRCA | 0.016799703  |
| UCK1 | Mesenchymal stem cell     | BRCA | -0.195654556 |
| UCK1 | Metabolism of xenobiotic  | BRCA | 0.176271734  |
| UCK1 | Migrating cancer stem cel | BRCA | -0.174099544 |
| UCK1 | Mitotic_spindle           | BRCA | -0.450535663 |
| UCK1 | Monocyte                  | BRCA | -0.016885214 |
| UCK1 | Mtor_signaling_pathway    | BRCA | -0.163606443 |
| UCK1 | Mtorc1_signaling          | BRCA | -0.17158466  |
| UCK1 | Mucin type o-glycan bios  | BRCA | -0.266203506 |
| UCK1 | Myc_targets_v1            | BRCA | 0.00190919   |
| UCK1 | Myeloid cell              | BRCA | -0.166114132 |
| UCK1 | N-glycan biosynthesis     | BRCA | -0.012107803 |

|      |                             |      |              |
|------|-----------------------------|------|--------------|
| UCK1 | Naive b cell                | BRCA | 0.021078873  |
| UCK1 | Naive cd4+ t cell           | BRCA | -0.143081761 |
| UCK1 | Naive cd8+ t cell           | BRCA | -0.119935104 |
| UCK1 | Natural killer cell         | BRCA | -0.088464279 |
| UCK1 | Natural killer t (nkt) cell | BRCA | 0.06523468   |
| UCK1 | Natural regulatory t (treg) | BRCA | -0.144124219 |
| UCK1 | Neomycin, kanamycin and     | BRCA | 0.042301279  |
| UCK1 | Neutrophil                  | BRCA | -0.128844595 |
| UCK1 | Nicotinate and nicotinami   | BRCA | 0.014089176  |
| UCK1 | Nitrogen metabolism         | BRCA | -0.125845203 |
| UCK1 | Nod_like_receptor_signal    | BRCA | -0.243080495 |
| UCK1 | Notch_signaling             | BRCA | -0.048018718 |
| UCK1 | One carbon pool by folate   | BRCA | -0.176155991 |
| UCK1 | Other glycan degradation    | BRCA | 0.207109169  |
| UCK1 | Other types of o-glycan b   | BRCA | 0.316144643  |
| UCK1 | Oxidative phosphorylatio    | BRCA | 0.359314843  |
| UCK1 | P53_pathway                 | BRCA | 0.309217774  |
| UCK1 | P53_signaling_pathway       | BRCA | -0.236366939 |
| UCK1 | Pantothenate and coa bios   | BRCA | 0.036125399  |
| UCK1 | Pentose and glucuronate i   | BRCA | 0.034472122  |
| UCK1 | Pentose phosphate pathwa    | BRCA | 0.147695629  |
| UCK1 | Pericyte                    | BRCA | -0.078542804 |
| UCK1 | Phenylalanine metabolism    | BRCA | 0.196375192  |
| UCK1 | Phenylalanine, tyrosine ar  | BRCA | 0.079253577  |
| UCK1 | Phosphonate and phosphir    | BRCA | -0.204208797 |
| UCK1 | Pi3k_akt_activation         | BRCA | -0.261017021 |
| UCK1 | Pi3k_akt_mtor_signaling     | BRCA | -0.140807706 |
| UCK1 | Porphyrin and chlorophyl    | BRCA | 0.199717519  |
| UCK1 | Primary bile acid biosynt   | BRCA | 0.143028872  |
| UCK1 | Propanoate metabolism       | BRCA | -0.182032596 |
| UCK1 | Purine metabolism           | BRCA | 0.068565885  |
| UCK1 | Pyrimidine metabolism       | BRCA | 0.171057682  |
| UCK1 | Pyruvate metabolism         | BRCA | 0.015197902  |
| UCK1 | Regulation_of_autophagy     | BRCA | -0.022161696 |
| UCK1 | Retinol metabolism          | BRCA | 0.120492956  |
| UCK1 | Riboflavin metabolism       | BRCA | 0.213136489  |
| UCK1 | Schmahl_pdgf_signaling      | BRCA | -0.262221796 |
| UCK1 | Selenocompound metabol      | BRCA | -0.224202702 |
| UCK1 | Signaling_by_hippo          | BRCA | -0.482413088 |
| UCK1 | Sphingolipid metabolism     | BRCA | -0.180109225 |
| UCK1 | Starch and sucrose metabo   | BRCA | -0.10651779  |
| UCK1 | Steroid biosynthesis        | BRCA | 0.032395889  |
| UCK1 | Steroid hormone biosynth    | BRCA | 0.12929279   |

|      |                            |      |              |
|------|----------------------------|------|--------------|
| UCK1 | Sulfur metabolism          | BRCA | 0.045388423  |
| UCK1 | Synthesis and degradation  | BRCA | 0.073240347  |
| UCK1 | T helper cell              | BRCA | -0.075654536 |
| UCK1 | T helper1 (th1) cell       | BRCA | -0.091007498 |
| UCK1 | T helper17 (th17) cell     | BRCA | -0.093144306 |
| UCK1 | T helper2 (th2) cell       | BRCA | -0.02619094  |
| UCK1 | T helper9 (th9) cell       | BRCA | 0.00919369   |
| UCK1 | Taurine and hypotaurine r  | BRCA | 0.27805502   |
| UCK1 | Terpenoid backbone biosy   | BRCA | -0.034823365 |
| UCK1 | Tgf_beta_signaling_pathw   | BRCA | -0.406470863 |
| UCK1 | Thiamine metabolism        | BRCA | 0.305642376  |
| UCK1 | Tnfa_signaling_via_nfkB    | BRCA | -0.118785736 |
| UCK1 | Tryptophan metabolism      | BRCA | 0.052162535  |
| UCK1 | Tumor endothelial cell     | BRCA | 0.012063519  |
| UCK1 | Tyrosine metabolism        | BRCA | 0.283292915  |
| UCK1 | Ubiquinone and other terp  | BRCA | 0.139592311  |
| UCK1 | Valine, leucine and isoleu | BRCA | 0.21143514   |
| UCK1 | Valine, leucine and isoleu | BRCA | 0.029401519  |
| UCK1 | Vascular endothelial cell  | BRCA | 0.020024949  |
| UCK1 | Vascular smooth muscle c   | BRCA | 0.041078442  |
| UCK1 | Vegf_signaling_pathway     | BRCA | -0.049262489 |
| UCK1 | Vitamin b6 metabolism      | BRCA | 0.028871962  |
| UCK1 | Willert_wnt_signaling      | BRCA | -0.123509594 |
| UCK1 | Wnt_beta_catenin_signali   | BRCA | 0.071510335  |
| UCK2 | Abnormal plasma cell       | BRCA | 0.227245115  |
| UCK2 | Activated b cell           | BRCA | 0.093878994  |
| UCK2 | Activated cd4+ t cell      | BRCA | 0.057815712  |
| UCK2 | Activated t cell           | BRCA | 0.114256502  |
| UCK2 | Alanine, aspartate and glu | BRCA | 0.083319388  |
| UCK2 | Alcala_apoptosis           | BRCA | 0.40518842   |
| UCK2 | Alpha-linolenic acid meta  | BRCA | -0.203666109 |
| UCK2 | Amino sugar and nucleoti   | BRCA | 0.268613647  |
| UCK2 | Ampk_pathway               | BRCA | 0.12216811   |
| UCK2 | Angiogenesis               | BRCA | -0.117963454 |
| UCK2 | Arachidonic acid metabol   | BRCA | -0.202213699 |
| UCK2 | Arginine and proline metε  | BRCA | 0.411910881  |
| UCK2 | Arginine biosynthesis      | BRCA | -0.01406444  |
| UCK2 | Ascorbate and aldarate mε  | BRCA | -0.059004194 |
| UCK2 | Atypical memory b cell     | BRCA | 0.032452261  |
| UCK2 | Axl+siglec6+ dendritic ce  | BRCA | -0.349875434 |
| UCK2 | B cell                     | BRCA | -0.032683496 |
| UCK2 | B1 cell                    | BRCA | 0.026835989  |
| UCK2 | Basal cell                 | BRCA | 0.261865747  |



|      |                             |      |              |
|------|-----------------------------|------|--------------|
| UCK2 | Beta-alanine metabolism     | BRCA | 0.016403265  |
| UCK2 | Biosynthesis of unsaturate  | BRCA | -0.174529178 |
| UCK2 | Biotin metabolism           | BRCA | -0.177834977 |
| UCK2 | Butanoate metabolism        | BRCA | -0.164929232 |
| UCK2 | Caffeine metabolism         | BRCA | -0.424193394 |
| UCK2 | Cancer stem cell            | BRCA | 0.074223747  |
| UCK2 | Cancer stem-like cell       | BRCA | 0.111220621  |
| UCK2 | Cd4+ cytotoxic t cell       | BRCA | 0.039500131  |
| UCK2 | Cd4+ memory t cell          | BRCA | 0.031577985  |
| UCK2 | Cd4+ regulatory t cell      | BRCA | 0.096167339  |
| UCK2 | Cd4+ t helper cell          | BRCA | -0.004314104 |
| UCK2 | Cd4+cd25+ regulatory t c    | BRCA | 0.028170793  |
| UCK2 | Cd8+ cytotoxic t cell       | BRCA | 0.113334799  |
| UCK2 | Cd8+ regulatory t cell      | BRCA | 0.031837825  |
| UCK2 | Cell_cycle                  | BRCA | 0.465553345  |
| UCK2 | Chandran_metastasis_top5    | BRCA | -0.017237119 |
| UCK2 | Citrate cycle (tca cycle)   | BRCA | 0.295548822  |
| UCK2 | Cysteine and methionine r   | BRCA | 0.476327929  |
| UCK2 | Cytokine induced killer c   | BRCA | 0.056475873  |
| UCK2 | D-arginine and d-ornithin   | BRCA | 0.021477045  |
| UCK2 | D-glutamine and d-glutan    | BRCA | -0.269438059 |
| UCK2 | Dendritic cell              | BRCA | -0.000694601 |
| UCK2 | Dna_repair                  | BRCA | 0.3492991    |
| UCK2 | Dna_replication             | BRCA | 0.531857473  |
| UCK2 | Double-negative memory      | BRCA | 0.08377964   |
| UCK2 | Drug metabolism - cytoch    | BRCA | -0.154053177 |
| UCK2 | Drug metabolism - other     | BRCA | 0.199568948  |
| UCK2 | E2f_targets                 | BRCA | 0.543553579  |
| UCK2 | Ecm_receptor_interaction    | BRCA | -0.232381729 |
| UCK2 | Effector cd4+ memory t (    | BRCA | -0.036202    |
| UCK2 | Effector cd8+ memory t (    | BRCA | -0.046095362 |
| UCK2 | Effector memory t cell      | BRCA | -0.005330623 |
| UCK2 | Effector regulatory t (treg | BRCA | -0.021784978 |
| UCK2 | Elvidge_hif1a_targets_up    | BRCA | 0.309112984  |
| UCK2 | Endothelial cell            | BRCA | -0.015863309 |
| UCK2 | Eosinophil                  | BRCA | 0.049622053  |
| UCK2 | Ether lipid metabolism      | BRCA | -0.188100802 |
| UCK2 | Exhausted cd4+ t cell       | BRCA | 0.022243193  |
| UCK2 | Exhausted cd8+ t cell       | BRCA | 0.058139855  |
| UCK2 | Exhausted t cell            | BRCA | 0.092224108  |
| UCK2 | Fat cell (adipocyte)        | BRCA | -0.159200124 |
| UCK2 | Fatty acid biosynthesis     | BRCA | 0.114542274  |
| UCK2 | Fatty acid degradation      | BRCA | -0.191871579 |

|      |                              |      |              |
|------|------------------------------|------|--------------|
| UCK2 | Fatty acid elongation        | BRCA | -0.020361369 |
| UCK2 | Fibroblast                   | BRCA | -0.184486147 |
| UCK2 | Folate biosynthesis          | BRCA | 0.096094438  |
| UCK2 | Follicular b cell            | BRCA | 0.002121868  |
| UCK2 | Follicular dendritic cell    | BRCA | 0.039547086  |
| UCK2 | Follicular helper (tfh) t ce | BRCA | 0.074860374  |
| UCK2 | Follicular t cell            | BRCA | 0.14908129   |
| UCK2 | Foxp3+il-17+ t cell          | BRCA | 0.177800646  |
| UCK2 | Fructose and mannose me      | BRCA | 0.133321257  |
| UCK2 | G2m_checkpoint               | BRCA | 0.484261865  |
| UCK2 | Galactose metabolism         | BRCA | 0.376523991  |
| UCK2 | Galie_tumor_stemness_ge      | BRCA | -0.174738158 |
| UCK2 | Glutathione metabolism       | BRCA | 0.244255642  |
| UCK2 | Glycerolipid metabolism      | BRCA | 0.138401931  |
| UCK2 | Glycerophospholipid metæ     | BRCA | -0.133390625 |
| UCK2 | Glycine, serine and threor   | BRCA | 0.15923563   |
| UCK2 | Glycolysis / gluconeogene    | BRCA | 0.278075138  |
| UCK2 | Glycosaminoglycan biosy1     | BRCA | -0.097924489 |
| UCK2 | Glycosaminoglycan biosy1     | BRCA | -0.179084584 |
| UCK2 | Glycosaminoglycan biosy1     | BRCA | 0.300682963  |
| UCK2 | Glycosaminoglycan degra      | BRCA | -0.123375273 |
| UCK2 | Glycosphingolipid biosyn1    | BRCA | -0.047770018 |
| UCK2 | Glycosphingolipid biosyn1    | BRCA | 0.007557501  |
| UCK2 | Glycosphingolipid biosyn1    | BRCA | 0.473382618  |
| UCK2 | Glycosylphosphatidylinos     | BRCA | -0.184351028 |
| UCK2 | Glyoxylate and dicarboxy     | BRCA | 0.181983757  |
| UCK2 | Granulocyte                  | BRCA | -0.000554425 |
| UCK2 | Hedgehog_signaling           | BRCA | -0.153521581 |
| UCK2 | Histidine metabolism         | BRCA | -0.088596375 |
| UCK2 | Hypoxia                      | BRCA | 0.182160429  |
| UCK2 | Il-17ralpha t cell           | BRCA | 0.034641612  |
| UCK2 | Il2_stat5_signaling          | BRCA | 0.068571064  |
| UCK2 | Il6_jak_stat3_signaling      | BRCA | 0.106462929  |
| UCK2 | Immune_checkpoints_tun       | BRCA | 0.085884527  |
| UCK2 | Immune_inhibition_cytok      | BRCA | 0.192614062  |
| UCK2 | Inositol phosphate metabo    | BRCA | -0.230120416 |
| UCK2 | Interleukin_6_signaling      | BRCA | -0.204082399 |
| UCK2 | Jaeger_metastasis_up         | BRCA | 0.42296099   |
| UCK2 | Jain_nfkb_signaling          | BRCA | 0.492832506  |
| UCK2 | Kras_signaling_up            | BRCA | -0.073854095 |
| UCK2 | Linoleic acid metabolism     | BRCA | -0.184516789 |
| UCK2 | Lipoic acid metabolism       | BRCA | -0.114447035 |
| UCK2 | Lysine degradation           | BRCA | 0.218008586  |

|      |                             |      |              |
|------|-----------------------------|------|--------------|
| UCK2 | Lysosome                    | BRCA | -0.164207464 |
| UCK2 | M1 macrophage               | BRCA | 0.112334598  |
| UCK2 | M2 macrophage               | BRCA | 0.010584225  |
| UCK2 | Mannose type o-glycan bi    | BRCA | 0.168681897  |
| UCK2 | Mapk_signaling_pathway      | BRCA | -0.311313629 |
| UCK2 | Mapk3_erk1_activation       | BRCA | -0.249040554 |
| UCK2 | Marginal zone b cell        | BRCA | 0.017482548  |
| UCK2 | Memory b cell               | BRCA | 0.116742077  |
| UCK2 | Mesenchymal cell            | BRCA | -0.050617398 |
| UCK2 | Mesenchymal stem cell       | BRCA | -0.099275734 |
| UCK2 | Metabolism of xenobiotic    | BRCA | -0.07593938  |
| UCK2 | Migrating cancer stem cel   | BRCA | 0.137260199  |
| UCK2 | Mitotic_spindle             | BRCA | 0.149172829  |
| UCK2 | Monocyte                    | BRCA | 0.026867398  |
| UCK2 | Mtor_signaling_pathway      | BRCA | -0.274669515 |
| UCK2 | Mtorc1_signaling            | BRCA | 0.486528767  |
| UCK2 | Mucin type o-glycan biosy   | BRCA | -0.198618881 |
| UCK2 | Myc_targets_v1              | BRCA | 0.611511998  |
| UCK2 | Myeloid cell                | BRCA | -0.011386561 |
| UCK2 | N-glycan biosynthesis       | BRCA | 0.021291118  |
| UCK2 | Naive b cell                | BRCA | 0.161329015  |
| UCK2 | Naive cd4+ t cell           | BRCA | -0.078181349 |
| UCK2 | Naive cd8+ t cell           | BRCA | -0.117438763 |
| UCK2 | Natural killer cell         | BRCA | 0.041590884  |
| UCK2 | Natural killer t (nkt) cell | BRCA | 0.239622926  |
| UCK2 | Natural regulatory t (treg) | BRCA | -0.002081063 |
| UCK2 | Neomycin, kanamycin an      | BRCA | 0.031189763  |
| UCK2 | Neutrophil                  | BRCA | 0.218593592  |
| UCK2 | Nicotinate and nicotinami   | BRCA | -0.038526886 |
| UCK2 | Nitrogen metabolism         | BRCA | -0.258012136 |
| UCK2 | Nod_like_receptor_signal    | BRCA | 0.152067417  |
| UCK2 | Notch_signaling             | BRCA | 0.136549548  |
| UCK2 | One carbon pool by folate   | BRCA | 0.506824126  |
| UCK2 | Other glycan degradation    | BRCA | -0.171369086 |
| UCK2 | Other types of o-glycan b   | BRCA | 0.006040897  |
| UCK2 | Oxidative phosphorylatio    | BRCA | 0.269911751  |
| UCK2 | P53_pathway                 | BRCA | -0.060917253 |
| UCK2 | P53_signaling_pathway       | BRCA | 0.238362256  |
| UCK2 | Pantothenate and coa bios   | BRCA | -0.14236652  |
| UCK2 | Pentose and glucuronate i   | BRCA | -0.043721633 |
| UCK2 | Pentose phosphate pathwa    | BRCA | 0.431603252  |
| UCK2 | Pericyte                    | BRCA | -0.203710113 |
| UCK2 | Phenylalanine metabolism    | BRCA | -0.02196998  |

|      |                            |      |              |
|------|----------------------------|------|--------------|
| UCK2 | Phenylalanine, tyrosine ar | BRCA | 0.057674854  |
| UCK2 | Phosphonate and phosphir   | BRCA | 0.057920669  |
| UCK2 | Pi3k_akt_activation        | BRCA | -0.338973272 |
| UCK2 | Pi3k_akt_mtor_signaling    | BRCA | 0.163800676  |
| UCK2 | Porphyrin and chlorophyl   | BRCA | 0.088675274  |
| UCK2 | Primary bile acid biosynt  | BRCA | -0.181480851 |
| UCK2 | Propanoate metabolism      | BRCA | -0.177964616 |
| UCK2 | Purine metabolism          | BRCA | 0.55997718   |
| UCK2 | Pyrimidine metabolism      | BRCA | 0.538745901  |
| UCK2 | Pyruvate metabolism        | BRCA | 0.290071991  |
| UCK2 | Regulation_of_autophagy    | BRCA | -0.123192809 |
| UCK2 | Retinol metabolism         | BRCA | -0.191420519 |
| UCK2 | Riboflavin metabolism      | BRCA | -0.010217743 |
| UCK2 | Schmahl_pdgf_signaling     | BRCA | -0.166544413 |
| UCK2 | Selenocompound metabol     | BRCA | 0.216032658  |
| UCK2 | Signaling_by_hippo         | BRCA | 0.041405345  |
| UCK2 | Sphingolipid metabolism    | BRCA | -0.330587567 |
| UCK2 | Starch and sucrose metabo  | BRCA | 0.057835783  |
| UCK2 | Steroid biosynthesis       | BRCA | 0.221915492  |
| UCK2 | Steroid hormone biosynth   | BRCA | -0.05538753  |
| UCK2 | Sulfur metabolism          | BRCA | 0.175306315  |
| UCK2 | Synthesis and degradation  | BRCA | 0.023027657  |
| UCK2 | T helper cell              | BRCA | -0.02269493  |
| UCK2 | T helper1 (th1) cell       | BRCA | 0.13672488   |
| UCK2 | T helper17 (th17) cell     | BRCA | 0.010482103  |
| UCK2 | T helper2 (th2) cell       | BRCA | -0.074565482 |
| UCK2 | T helper9 (th9) cell       | BRCA | -0.117271415 |
| UCK2 | Taurine and hypotaurine r  | BRCA | -0.213047984 |
| UCK2 | Terpenoid backbone biosy   | BRCA | 0.309843995  |
| UCK2 | Tgf_beta_signaling_pathw   | BRCA | -0.238022982 |
| UCK2 | Thiamine metabolism        | BRCA | 0.064473487  |
| UCK2 | Tnfa_signaling_via_nfk     | BRCA | 0.11932049   |
| UCK2 | Tryptophan metabolism      | BRCA | 0.206530882  |
| UCK2 | Tumor endothelial cell     | BRCA | 0.411293363  |
| UCK2 | Tyrosine metabolism        | BRCA | -0.174105674 |
| UCK2 | Ubiquinone and other ter   | BRCA | -0.069150216 |
| UCK2 | Valine, leucine and isoleu | BRCA | -0.093198005 |
| UCK2 | Valine, leucine and isoleu | BRCA | -0.205680099 |
| UCK2 | Vascular endothelial cell  | BRCA | -0.177120214 |
| UCK2 | Vascular smooth muscle c   | BRCA | -0.30463402  |
| UCK2 | Vegf_signaling_pathway     | BRCA | -0.025398777 |
| UCK2 | Vitamin b6 metabolism      | BRCA | 0.275476775  |
| UCK2 | Willert_wnt_signaling      | BRCA | -0.011301986 |

|       |                            |      |              |
|-------|----------------------------|------|--------------|
| UCK2  | Wnt_beta_catenin_signali   | BRCA | 0.210152708  |
| UCKL1 | Abnormal plasma cell       | BRCA | -0.081415772 |
| UCKL1 | Activated b cell           | BRCA | -0.003287069 |
| UCKL1 | Activated cd4+ t cell      | BRCA | -0.073074685 |
| UCKL1 | Activated t cell           | BRCA | -0.033013172 |
| UCKL1 | Alanine, aspartate and glu | BRCA | -0.087029096 |
| UCKL1 | Alcala_apoptosis           | BRCA | 0.106359866  |
| UCKL1 | Alpha-linolenic acid meta  | BRCA | 0.020287424  |
| UCKL1 | Amino sugar and nucleoti   | BRCA | 0.055903946  |
| UCKL1 | Ampk_pathway               | BRCA | 0.255238378  |
| UCKL1 | Angiogenesis               | BRCA | -0.232812673 |
| UCKL1 | Arachidonic acid metabol   | BRCA | 0.06014062   |
| UCKL1 | Arginine and proline metæ  | BRCA | 0.016235918  |
| UCKL1 | Arginine biosynthesis      | BRCA | -0.031393787 |
| UCKL1 | Ascorbate and aldarate mε  | BRCA | -0.182633529 |
| UCKL1 | Atypical memory b cell     | BRCA | -0.048849487 |
| UCKL1 | Axl+siglec6+ dendritic ce  | BRCA | -0.175028986 |
| UCKL1 | B cell                     | BRCA | -0.144179341 |
| UCKL1 | B1 cell                    | BRCA | 0.018612902  |
| UCKL1 | Basal cell                 | BRCA | 0.00800512   |
| UCKL1 | Beta-alanine metabolism    | BRCA | -0.203473213 |
| UCKL1 | Biosynthesis of unsaturate | BRCA | -0.096965045 |
| UCKL1 | Biotin metabolism          | BRCA | -0.183435254 |
| UCKL1 | Butanoate metabolism       | BRCA | -0.094262197 |
| UCKL1 | Caffeine metabolism        | BRCA | -0.171509692 |
| UCKL1 | Cancer stem cell           | BRCA | -0.264120823 |
| UCKL1 | Cancer stem-like cell      | BRCA | -0.235376579 |
| UCKL1 | Cd4+ cytotoxic t cell      | BRCA | -0.053397622 |
| UCKL1 | Cd4+ memory t cell         | BRCA | -0.00500921  |
| UCKL1 | Cd4+ regulatory t cell     | BRCA | -0.056087766 |
| UCKL1 | Cd4+ t helper cell         | BRCA | -0.078630385 |
| UCKL1 | Cd4+cd25+ regulatory t c   | BRCA | -0.073167375 |
| UCKL1 | Cd8+ cytotoxic t cell      | BRCA | -0.023449466 |
| UCKL1 | Cd8+ regulatory t cell     | BRCA | -0.031550118 |
| UCKL1 | Cell_cycle                 | BRCA | 0.031193678  |
| UCKL1 | Chandran_metastasis_topε   | BRCA | -0.248969682 |
| UCKL1 | Citrate cycle (tca cycle)  | BRCA | 8.78E-05     |
| UCKL1 | Cysteine and methionine r  | BRCA | 0.066090699  |
| UCKL1 | Cytokine induced killer cε | BRCA | -0.016580023 |
| UCKL1 | D-arginine and d-ornithin  | BRCA | 0.022094502  |
| UCKL1 | D-glutamine and d-glutan   | BRCA | -0.253492217 |
| UCKL1 | Dendritic cell             | BRCA | -0.122179245 |
| UCKL1 | Dna_repair                 | BRCA | 0.383715756  |

|       |                              |      |              |
|-------|------------------------------|------|--------------|
| UCKL1 | Dna_replication              | BRCA | 0.210570367  |
| UCKL1 | Double-negative memory       | BRCA | 0.106641081  |
| UCKL1 | Drug metabolism - cytoch     | BRCA | -0.10167204  |
| UCKL1 | Drug metabolism - other      | BRCA | 0.191436696  |
| UCKL1 | E2f_targets                  | BRCA | 0.102511845  |
| UCKL1 | Ecm_receptor_interaction     | BRCA | -0.233491199 |
| UCKL1 | Effector cd4+ memory t       | BRCA | -0.104561544 |
| UCKL1 | Effector cd8+ memory t       | BRCA | -0.085523638 |
| UCKL1 | Effector memory t cell       | BRCA | -0.082714791 |
| UCKL1 | Effector regulatory t (treg  | BRCA | -0.154669837 |
| UCKL1 | Elvidge_hif1a_targets_up     | BRCA | -0.191395262 |
| UCKL1 | Endothelial cell             | BRCA | -0.290654052 |
| UCKL1 | Eosinophil                   | BRCA | -0.105123639 |
| UCKL1 | Ether lipid metabolism       | BRCA | -0.058676943 |
| UCKL1 | Exhausted cd4+ t cell        | BRCA | -0.192550505 |
| UCKL1 | Exhausted cd8+ t cell        | BRCA | -0.138842109 |
| UCKL1 | Exhausted t cell             | BRCA | -0.00793833  |
| UCKL1 | Fat cell (adipocyte)         | BRCA | 0.032403394  |
| UCKL1 | Fatty acid biosynthesis      | BRCA | -0.128513494 |
| UCKL1 | Fatty acid degradation       | BRCA | -0.171355906 |
| UCKL1 | Fatty acid elongation        | BRCA | -0.014739326 |
| UCKL1 | Fibroblast                   | BRCA | -0.288984279 |
| UCKL1 | Folate biosynthesis          | BRCA | 0.07319828   |
| UCKL1 | Follicular b cell            | BRCA | -0.09075375  |
| UCKL1 | Follicular dendritic cell    | BRCA | 0.00146002   |
| UCKL1 | Follicular helper (tfh) t ce | BRCA | -0.085279257 |
| UCKL1 | Follicular t cell            | BRCA | 0.195049654  |
| UCKL1 | Foxp3+il-17+ t cell          | BRCA | 0.007857383  |
| UCKL1 | Fructose and mannose me      | BRCA | 0.270236758  |
| UCKL1 | G2m_checkpoint               | BRCA | -0.003356908 |
| UCKL1 | Galactose metabolism         | BRCA | 0.14278899   |
| UCKL1 | Galie_tumor_stemness_ge      | BRCA | -0.324608646 |
| UCKL1 | Glutathione metabolism       | BRCA | 0.07057199   |
| UCKL1 | Glycerolipid metabolism      | BRCA | -0.027385817 |
| UCKL1 | Glycerophospholipid metæ     | BRCA | 0.271783647  |
| UCKL1 | Glycine, serine and threor   | BRCA | 0.176481184  |
| UCKL1 | Glycolysis / gluconeogene    | BRCA | 0.085520981  |
| UCKL1 | Glycosaminoglycan biosy      | BRCA | 0.055583947  |
| UCKL1 | Glycosaminoglycan biosy      | BRCA | -0.055467533 |
| UCKL1 | Glycosaminoglycan biosy      | BRCA | -0.078298277 |
| UCKL1 | Glycosaminoglycan degra      | BRCA | 0.025805775  |
| UCKL1 | Glycosphingolipid biosyn     | BRCA | -0.12054876  |
| UCKL1 | Glycosphingolipid biosyn     | BRCA | -0.144092671 |

|       |                           |      |              |
|-------|---------------------------|------|--------------|
| UCKL1 | Glycosphingolipid biosyn  | BRCA | -0.068042295 |
| UCKL1 | Glycosylphosphatidylinos  | BRCA | -0.040602742 |
| UCKL1 | Glyoxylate and dicarboxy  | BRCA | 0.109226879  |
| UCKL1 | Granulocyte               | BRCA | -0.152564182 |
| UCKL1 | Hedgehog_signaling        | BRCA | -0.227244446 |
| UCKL1 | Histidine metabolism      | BRCA | -0.12939301  |
| UCKL1 | Hypoxia                   | BRCA | -0.091162389 |
| UCKL1 | Il-17alpha t cell         | BRCA | -0.055388806 |
| UCKL1 | Il2_stat5_signaling       | BRCA | -0.18221606  |
| UCKL1 | Il6_jak_stat3_signaling   | BRCA | -0.15999031  |
| UCKL1 | Immune_checkpoints_tun    | BRCA | -0.179828213 |
| UCKL1 | Immune_inhibition_cytok   | BRCA | 0.039428809  |
| UCKL1 | Inositol phosphate metabo | BRCA | -0.28968689  |
| UCKL1 | Interleukin_6_signaling   | BRCA | -0.403069743 |
| UCKL1 | Jaeger_metastasis_up      | BRCA | -0.109455292 |
| UCKL1 | Jain_nfkb_signaling       | BRCA | 0.10964275   |
| UCKL1 | Kras_signaling_up         | BRCA | -0.327724751 |
| UCKL1 | Linoleic acid metabolism  | BRCA | 0.103539753  |
| UCKL1 | Lipoic acid metabolism    | BRCA | 0.144113494  |
| UCKL1 | Lysine degradation        | BRCA | -0.165264722 |
| UCKL1 | Lysosome                  | BRCA | -0.063420921 |
| UCKL1 | M1 macrophage             | BRCA | -0.14276485  |
| UCKL1 | M2 macrophage             | BRCA | -0.129843883 |
| UCKL1 | Mannose type o-glycan bi  | BRCA | 0.082564535  |
| UCKL1 | Mapk_signaling_pathway    | BRCA | -0.242294862 |
| UCKL1 | Mapk3_erk1_activation     | BRCA | -0.306149515 |
| UCKL1 | Marginal zone b cell      | BRCA | -0.140187124 |
| UCKL1 | Memory b cell             | BRCA | -0.138756797 |
| UCKL1 | Mesenchymal cell          | BRCA | -0.126917665 |
| UCKL1 | Mesenchymal stem cell     | BRCA | -0.273187745 |
| UCKL1 | Metabolism of xenobiotic  | BRCA | -0.000244685 |
| UCKL1 | Migrating cancer stem cel | BRCA | -0.247790774 |
| UCKL1 | Mitotic_spindle           | BRCA | -0.18937648  |
| UCKL1 | Monocyte                  | BRCA | -0.106136814 |
| UCKL1 | Mtor_signaling_pathway    | BRCA | -0.134074332 |
| UCKL1 | Mtorc1_signaling          | BRCA | -0.063540242 |
| UCKL1 | Mucin type o-glycan bios  | BRCA | -0.439625205 |
| UCKL1 | Myc_targets_v1            | BRCA | 0.128809795  |
| UCKL1 | Myeloid cell              | BRCA | -0.160145818 |
| UCKL1 | N-glycan biosynthesis     | BRCA | -0.224491076 |
| UCKL1 | Naive b cell              | BRCA | 0.060341708  |
| UCKL1 | Naive cd4+ t cell         | BRCA | -0.176082221 |
| UCKL1 | Naive cd8+ t cell         | BRCA | -0.121211089 |

|       |                             |      |              |
|-------|-----------------------------|------|--------------|
| UCKL1 | Natural killer cell         | BRCA | -0.095600435 |
| UCKL1 | Natural killer t (nkt) cell | BRCA | 0.091346817  |
| UCKL1 | Natural regulatory t (treg) | BRCA | -0.134730055 |
| UCKL1 | Neomycin, kanamycin and     | BRCA | 0.106210329  |
| UCKL1 | Neutrophil                  | BRCA | -0.153669163 |
| UCKL1 | Nicotinate and nicotinami   | BRCA | -0.011663133 |
| UCKL1 | Nitrogen metabolism         | BRCA | -0.302593136 |
| UCKL1 | Nod_like_receptor_signal    | BRCA | -0.17839578  |
| UCKL1 | Notch_signaling             | BRCA | -0.175449276 |
| UCKL1 | One carbon pool by folate   | BRCA | 0.042237329  |
| UCKL1 | Other glycan degradation    | BRCA | 0.1599504    |
| UCKL1 | Other types of o-glycan b   | BRCA | 0.168466121  |
| UCKL1 | Oxidative phosphorylatio    | BRCA | 0.243887851  |
| UCKL1 | P53_pathway                 | BRCA | 0.023397011  |
| UCKL1 | P53_signaling_pathway       | BRCA | -0.220839166 |
| UCKL1 | Pantothenate and coa bios   | BRCA | -0.038522238 |
| UCKL1 | Pentose and glucuronate i   | BRCA | -0.163781847 |
| UCKL1 | Pentose phosphate pathwa    | BRCA | 0.144985893  |
| UCKL1 | Pericyte                    | BRCA | -0.200195479 |
| UCKL1 | Phenylalanine metabolism    | BRCA | 0.118745196  |
| UCKL1 | Phenylalanine, tyrosine ar  | BRCA | 0.134717213  |
| UCKL1 | Phosphonate and phosphir    | BRCA | -0.18946441  |
| UCKL1 | Pi3k_akt_activation         | BRCA | -0.29836109  |
| UCKL1 | Pi3k_akt_mtor_signaling     | BRCA | -0.183326378 |
| UCKL1 | Porphyrin and chlorophyl    | BRCA | -0.009660059 |
| UCKL1 | Primary bile acid biosynt   | BRCA | -0.163265371 |
| UCKL1 | Propanoate metabolism       | BRCA | -0.250110645 |
| UCKL1 | Purine metabolism           | BRCA | 0.142693833  |
| UCKL1 | Pyrimidine metabolism       | BRCA | 0.305824655  |
| UCKL1 | Pyruvate metabolism         | BRCA | 0.043376974  |
| UCKL1 | Regulation_of_autophagy     | BRCA | -0.009698996 |
| UCKL1 | Retinol metabolism          | BRCA | -0.13265263  |
| UCKL1 | Riboflavin metabolism       | BRCA | 0.050723236  |
| UCKL1 | Schmahl_pdgf_signaling      | BRCA | -0.471463304 |
| UCKL1 | Selenocompound metabol      | BRCA | -0.110601133 |
| UCKL1 | Signaling_by_hippo          | BRCA | -0.42714243  |
| UCKL1 | Sphingolipid metabolism     | BRCA | -0.403385834 |
| UCKL1 | Starch and sucrose metabo   | BRCA | -0.176353687 |
| UCKL1 | Steroid biosynthesis        | BRCA | 0.073789772  |
| UCKL1 | Steroid hormone biosynth    | BRCA | -0.112221136 |
| UCKL1 | Sulfur metabolism           | BRCA | -0.120028225 |
| UCKL1 | Synthesis and degradation   | BRCA | 0.00707369   |
| UCKL1 | T helper cell               | BRCA | -0.112895636 |



|       |                            |      |              |
|-------|----------------------------|------|--------------|
| UCKL1 | T helper1 (th1) cell       | BRCA | -0.078407413 |
| UCKL1 | T helper17 (th17) cell     | BRCA | -0.132054328 |
| UCKL1 | T helper2 (th2) cell       | BRCA | -0.086719248 |
| UCKL1 | T helper9 (th9) cell       | BRCA | -0.042344201 |
| UCKL1 | Taurine and hypotaurine r  | BRCA | 0.147889549  |
| UCKL1 | Terpenoid backbone biosy   | BRCA | 0.004299854  |
| UCKL1 | Tgf_beta_signaling_pathw   | BRCA | -0.411539179 |
| UCKL1 | Thiamine metabolism        | BRCA | 0.12590321   |
| UCKL1 | Tnfa_signaling_via_nfkb    | BRCA | -0.128413492 |
| UCKL1 | Tryptophan metabolism      | BRCA | -0.096011997 |
| UCKL1 | Tumor endothelial cell     | BRCA | 0.08395703   |
| UCKL1 | Tyrosine metabolism        | BRCA | 0.04274803   |
| UCKL1 | Ubiquinone and other terf  | BRCA | -0.006992816 |
| UCKL1 | Valine, leucine and isoleu | BRCA | 0.153135018  |
| UCKL1 | Valine, leucine and isoleu | BRCA | -0.162467455 |
| UCKL1 | Vascular endothelial cell  | BRCA | -0.165706456 |
| UCKL1 | Vascular smooth muscle c   | BRCA | -0.101817986 |
| UCKL1 | Vegf_signaling_pathway     | BRCA | 0.005326781  |
| UCKL1 | Vitamin b6 metabolism      | BRCA | 0.07643241   |
| UCKL1 | Willert_wnt_signaling      | BRCA | -0.170652301 |
| UCKL1 | Wnt_beta_catenin_signali   | BRCA | 0.090674346  |
| UPP1  | Abnormal plasma cell       | BRCA | 0.350767391  |
| UPP1  | Activated b cell           | BRCA | 0.399921795  |
| UPP1  | Activated cd4+ t cell      | BRCA | 0.38818154   |
| UPP1  | Activated t cell           | BRCA | 0.372567573  |
| UPP1  | Alanine, aspartate and glu | BRCA | -0.200228776 |
| UPP1  | Alcala_apoptosis           | BRCA | 0.391965023  |
| UPP1  | Alpha-linolenic acid meta  | BRCA | 0.026997468  |
| UPP1  | Amino sugar and nucleoti   | BRCA | 0.366167226  |
| UPP1  | Ampk_pathway               | BRCA | -0.164229076 |
| UPP1  | Angiogenesis               | BRCA | 0.28027526   |
| UPP1  | Arachidonic acid metaboli  | BRCA | 0.275553278  |
| UPP1  | Arginine and proline met   | BRCA | 0.287219373  |
| UPP1  | Arginine biosynthesis      | BRCA | -0.137241942 |
| UPP1  | Ascorbate and aldarate m   | BRCA | -0.168218213 |
| UPP1  | Atypical memory b cell     | BRCA | 0.31645619   |
| UPP1  | Axl+siglec6+ dendritic ce  | BRCA | 0.20664321   |
| UPP1  | B cell                     | BRCA | 0.306405971  |
| UPP1  | B1 cell                    | BRCA | 0.298543759  |
| UPP1  | Basal cell                 | BRCA | 0.548322364  |
| UPP1  | Beta-alanine metabolism    | BRCA | 0.088277849  |
| UPP1  | Biosynthesis of unsaturate | BRCA | -0.242614665 |
| UPP1  | Biotin metabolism          | BRCA | -0.384765776 |

|      |                             |      |              |
|------|-----------------------------|------|--------------|
| UPP1 | Butanoate metabolism        | BRCA | -0.277832117 |
| UPP1 | Caffeine metabolism         | BRCA | -0.359750651 |
| UPP1 | Cancer stem cell            | BRCA | 0.39680301   |
| UPP1 | Cancer stem-like cell       | BRCA | 0.273790114  |
| UPP1 | Cd4+ cytotoxic t cell       | BRCA | 0.511203534  |
| UPP1 | Cd4+ memory t cell          | BRCA | 0.272319063  |
| UPP1 | Cd4+ regulatory t cell      | BRCA | 0.399676145  |
| UPP1 | Cd4+ t helper cell          | BRCA | 0.31766648   |
| UPP1 | Cd4+cd25+ regulatory t c    | BRCA | 0.337913798  |
| UPP1 | Cd8+ cytotoxic t cell       | BRCA | 0.351067607  |
| UPP1 | Cd8+ regulatory t cell      | BRCA | 0.29131275   |
| UPP1 | Cell_cycle                  | BRCA | 0.046994776  |
| UPP1 | Chandran_metastasis_top     | BRCA | -0.545678675 |
| UPP1 | Citrate cycle (tca cycle)   | BRCA | 0.063291224  |
| UPP1 | Cysteine and methionine r   | BRCA | 0.169989262  |
| UPP1 | Cytokine induced killer c   | BRCA | 0.341927353  |
| UPP1 | D-arginine and d-ornithin   | BRCA | 0.024667233  |
| UPP1 | D-glutamine and d-glutan    | BRCA | -0.432723713 |
| UPP1 | Dendritic cell              | BRCA | 0.459172677  |
| UPP1 | Dna_repair                  | BRCA | 0.194444914  |
| UPP1 | Dna_replication             | BRCA | 0.210334597  |
| UPP1 | Double-negative memory      | BRCA | 0.333658714  |
| UPP1 | Drug metabolism - cytoch    | BRCA | -0.03869392  |
| UPP1 | Drug metabolism - other     | BRCA | 0.148540328  |
| UPP1 | E2f_targets                 | BRCA | 0.097125817  |
| UPP1 | Ecm_receptor_interaction    | BRCA | 0.15359356   |
| UPP1 | Effector cd4+ memory t (    | BRCA | 0.240349132  |
| UPP1 | Effector cd8+ memory t (    | BRCA | 0.472622617  |
| UPP1 | Effector memory t cell      | BRCA | 0.27773746   |
| UPP1 | Effector regulatory t (treg | BRCA | 0.30210471   |
| UPP1 | Elvidge_hif1a_targets_up    | BRCA | -0.059986464 |
| UPP1 | Endothelial cell            | BRCA | 0.286702377  |
| UPP1 | Eosinophil                  | BRCA | 0.455698071  |
| UPP1 | Ether lipid metabolism      | BRCA | 0.1548026    |
| UPP1 | Exhausted cd4+ t cell       | BRCA | 0.350552078  |
| UPP1 | Exhausted cd8+ t cell       | BRCA | 0.456233878  |
| UPP1 | Exhausted t cell            | BRCA | 0.362083133  |
| UPP1 | Fat cell (adipocyte)        | BRCA | 0.090436693  |
| UPP1 | Fatty acid biosynthesis     | BRCA | 0.082185592  |
| UPP1 | Fatty acid degradation      | BRCA | -0.14752321  |
| UPP1 | Fatty acid elongation       | BRCA | -0.096081494 |
| UPP1 | Fibroblast                  | BRCA | 0.229453854  |
| UPP1 | Folate biosynthesis         | BRCA | -0.049064495 |

|      |                              |      |              |
|------|------------------------------|------|--------------|
| UPP1 | Follicular b cell            | BRCA | 0.322558832  |
| UPP1 | Follicular dendritic cell    | BRCA | 0.314494503  |
| UPP1 | Follicular helper (tfh) t ce | BRCA | 0.405850969  |
| UPP1 | Follicular t cell            | BRCA | 0.419664828  |
| UPP1 | Foxp3+il-17+ t cell          | BRCA | 0.281580491  |
| UPP1 | Fructose and mannose me      | BRCA | 0.221106386  |
| UPP1 | G2m_checkpoint               | BRCA | 0.015241739  |
| UPP1 | Galactose metabolism         | BRCA | 0.56050178   |
| UPP1 | Galie_tumor_stemness_ge      | BRCA | 0.105796812  |
| UPP1 | Glutathione metabolism       | BRCA | 0.314183214  |
| UPP1 | Glycerolipid metabolism      | BRCA | 0.256758553  |
| UPP1 | Glycerophospholipid metæ     | BRCA | 0.171590074  |
| UPP1 | Glycine, serine and threor   | BRCA | 0.24763266   |
| UPP1 | Glycolysis / gluconeogene    | BRCA | 0.262022721  |
| UPP1 | Glycosaminoglycan biosy      | BRCA | 0.464006556  |
| UPP1 | Glycosaminoglycan biosy      | BRCA | 0.113815119  |
| UPP1 | Glycosaminoglycan biosy      | BRCA | 0.440505997  |
| UPP1 | Glycosaminoglycan degra      | BRCA | 0.288042719  |
| UPP1 | Glycosphingolipid biosyn     | BRCA | 0.319480857  |
| UPP1 | Glycosphingolipid biosyn     | BRCA | 0.338988766  |
| UPP1 | Glycosphingolipid biosyn     | BRCA | 0.514454722  |
| UPP1 | Glycosylphosphatidylinos     | BRCA | -0.46255323  |
| UPP1 | Glyoxylate and dicarboxy     | BRCA | 0.03377002   |
| UPP1 | Granulocyte                  | BRCA | 0.441626621  |
| UPP1 | Hedgehog_signaling           | BRCA | 0.069347408  |
| UPP1 | Histidine metabolism         | BRCA | 0.022971727  |
| UPP1 | Hypoxia                      | BRCA | 0.597067901  |
| UPP1 | Il-17alpha t cell            | BRCA | 0.283728088  |
| UPP1 | Il2_stat5_signaling          | BRCA | 0.492625537  |
| UPP1 | Il6_jak_stat3_signaling      | BRCA | 0.498977918  |
| UPP1 | Immune_checkpoints_tun       | BRCA | 0.399493649  |
| UPP1 | Immune_inhibition_cytok      | BRCA | 0.584854079  |
| UPP1 | Inositol phosphate metabo    | BRCA | -0.331272501 |
| UPP1 | Interleukin_6_signaling      | BRCA | -0.032373287 |
| UPP1 | Jaeger_metastasis_up         | BRCA | 0.256180969  |
| UPP1 | Jain_nfkb_signaling          | BRCA | 0.064600299  |
| UPP1 | Kras_signaling_up            | BRCA | 0.362076331  |
| UPP1 | Linoleic acid metabolism     | BRCA | 0.008605662  |
| UPP1 | Lipoic acid metabolism       | BRCA | -0.188049878 |
| UPP1 | Lysine degradation           | BRCA | -0.188019552 |
| UPP1 | Lysosome                     | BRCA | 0.175275447  |
| UPP1 | M1 macrophage                | BRCA | 0.447707164  |
| UPP1 | M2 macrophage                | BRCA | 0.469275763  |

|      |                             |      |              |
|------|-----------------------------|------|--------------|
| UPP1 | Mannose type o-glycan bi    | BRCA | 0.154419434  |
| UPP1 | Mapk_signaling_pathway      | BRCA | 0.169977569  |
| UPP1 | Mapk3_erk1_activation       | BRCA | -0.082456415 |
| UPP1 | Marginal zone b cell        | BRCA | 0.282487769  |
| UPP1 | Memory b cell               | BRCA | 0.326232476  |
| UPP1 | Mesenchymal cell            | BRCA | 0.407370675  |
| UPP1 | Mesenchymal stem cell       | BRCA | 0.36723809   |
| UPP1 | Metabolism of xenobiotic    | BRCA | 0.068901952  |
| UPP1 | Migrating cancer stem cel   | BRCA | 0.134974198  |
| UPP1 | Mitotic_spindle             | BRCA | -0.114951236 |
| UPP1 | Monocyte                    | BRCA | 0.569471277  |
| UPP1 | Mtor_signaling_pathway      | BRCA | -0.187575216 |
| UPP1 | Mtorc1_signaling            | BRCA | 0.229004962  |
| UPP1 | Mucin type o-glycan bios    | BRCA | -0.137049396 |
| UPP1 | Myc_targets_v1              | BRCA | 0.200875001  |
| UPP1 | Myeloid cell                | BRCA | 0.382563724  |
| UPP1 | N-glycan biosynthesis       | BRCA | -0.141944277 |
| UPP1 | Naive b cell                | BRCA | 0.310699625  |
| UPP1 | Naive cd4+ t cell           | BRCA | 0.25963584   |
| UPP1 | Naive cd8+ t cell           | BRCA | 0.217127524  |
| UPP1 | Natural killer cell         | BRCA | 0.377417266  |
| UPP1 | Natural killer t (nkt) cell | BRCA | 0.389664483  |
| UPP1 | Natural regulatory t (treg) | BRCA | 0.285234662  |
| UPP1 | Neomycin, kanamycin and     | BRCA | 0.331033651  |
| UPP1 | Neutrophil                  | BRCA | 0.615306205  |
| UPP1 | Nicotinate and nicotinami   | BRCA | 0.107987958  |
| UPP1 | Nitrogen metabolism         | BRCA | -0.306368915 |
| UPP1 | Nod_like_receptor_signal    | BRCA | 0.418585726  |
| UPP1 | Notch_signaling             | BRCA | 0.347965896  |
| UPP1 | One carbon pool by folate   | BRCA | 0.184936706  |
| UPP1 | Other glycan degradation    | BRCA | 0.090792115  |
| UPP1 | Other types of o-glycan b   | BRCA | 0.243922782  |
| UPP1 | Oxidative phosphorylatio    | BRCA | 0.236453242  |
| UPP1 | P53_pathway                 | BRCA | 0.465451433  |
| UPP1 | P53_signaling_pathway       | BRCA | 0.117112334  |
| UPP1 | Pantothenate and coa bios   | BRCA | -0.02517587  |
| UPP1 | Pentose and glucuronate in  | BRCA | -0.091021329 |
| UPP1 | Pentose phosphate pathwa    | BRCA | 0.426872894  |
| UPP1 | Pericyte                    | BRCA | 0.284846329  |
| UPP1 | Phenylalanine metabolism    | BRCA | 0.233272632  |
| UPP1 | Phenylalanine, tyrosine ar  | BRCA | 0.029438485  |
| UPP1 | Phosphonate and phosphir    | BRCA | -0.020783694 |
| UPP1 | Pi3k_akt_activation         | BRCA | -0.224320367 |

|      |                            |      |              |
|------|----------------------------|------|--------------|
| UPP1 | Pi3k_akt_mtor_signaling    | BRCA | 0.125622503  |
| UPP1 | Porphyrin and chlorophyl   | BRCA | -0.012228197 |
| UPP1 | Primary bile acid biosynt  | BRCA | 0.022274961  |
| UPP1 | Propanoate metabolism      | BRCA | -0.385287142 |
| UPP1 | Purine metabolism          | BRCA | 0.195862684  |
| UPP1 | Pyrimidine metabolism      | BRCA | 0.203250901  |
| UPP1 | Pyruvate metabolism        | BRCA | 0.04467928   |
| UPP1 | Regulation_of_autophagy    | BRCA | -0.161817692 |
| UPP1 | Retinol metabolism         | BRCA | -0.016531084 |
| UPP1 | Riboflavin metabolism      | BRCA | -0.016786945 |
| UPP1 | Schmahl_pdgf_signaling     | BRCA | -0.04424291  |
| UPP1 | Selenocompound metabol     | BRCA | -0.225472387 |
| UPP1 | Signaling_by_hippo         | BRCA | -0.158633702 |
| UPP1 | Sphingolipid metabolism    | BRCA | -0.356945863 |
| UPP1 | Starch and sucrose metabo  | BRCA | 0.268953355  |
| UPP1 | Steroid biosynthesis       | BRCA | 0.055880731  |
| UPP1 | Steroid hormone biosynth   | BRCA | 0.043668275  |
| UPP1 | Sulfur metabolism          | BRCA | -0.050200416 |
| UPP1 | Synthesis and degradation  | BRCA | -0.059516045 |
| UPP1 | T helper cell              | BRCA | 0.342251498  |
| UPP1 | T helper1 (th1) cell       | BRCA | 0.434537563  |
| UPP1 | T helper17 (th17) cell     | BRCA | 0.386021042  |
| UPP1 | T helper2 (th2) cell       | BRCA | 0.308845548  |
| UPP1 | T helper9 (th9) cell       | BRCA | 0.207915305  |
| UPP1 | Taurine and hypotaurine r  | BRCA | -0.040788963 |
| UPP1 | Terpenoid backbone biosy   | BRCA | 0.014873302  |
| UPP1 | Tgf_beta_signaling_pathw   | BRCA | -0.139715939 |
| UPP1 | Thiamine metabolism        | BRCA | 0.083791736  |
| UPP1 | Tnfa_signaling_via_nfkb    | BRCA | 0.540556924  |
| UPP1 | Tryptophan metabolism      | BRCA | 0.272895401  |
| UPP1 | Tumor endothelial cell     | BRCA | 0.485444547  |
| UPP1 | Tyrosine metabolism        | BRCA | 0.058716451  |
| UPP1 | Ubiquinone and other ter   | BRCA | -0.231279205 |
| UPP1 | Valine, leucine and isoleu | BRCA | 0.155825407  |
| UPP1 | Valine, leucine and isoleu | BRCA | -0.323193938 |
| UPP1 | Vascular endothelial cell  | BRCA | 0.289761081  |
| UPP1 | Vascular smooth muscle c   | BRCA | 0.01493071   |
| UPP1 | Vegf_signaling_pathway     | BRCA | 0.398183485  |
| UPP1 | Vitamin b6 metabolism      | BRCA | 0.161826778  |
| UPP1 | Willert_wnt_signaling      | BRCA | -0.091210895 |
| UPP1 | Wnt_beta_catenin_signali   | BRCA | 0.32862492   |
| UPP2 | Abnormal plasma cell       | BRCA | -0.095160789 |
| UPP2 | Activated b cell           | BRCA | -0.141437912 |

|      |                                      |      |              |
|------|--------------------------------------|------|--------------|
| UPP2 | Activated cd4+ t cell                | BRCA | -0.151711107 |
| UPP2 | Activated t cell                     | BRCA | -0.143567986 |
| UPP2 | Alanine, aspartate and glu           | BRCA | -0.095593982 |
| UPP2 | Alcala_apoptosis                     | BRCA | -0.227101002 |
| UPP2 | Alpha-linolenic acid meta            | BRCA | 0.015936278  |
| UPP2 | Amino sugar and nucleoti             | BRCA | -0.219658024 |
| UPP2 | Ampk_pathway                         | BRCA | -0.042230414 |
| UPP2 | Angiogenesis                         | BRCA | -0.092612525 |
| UPP2 | Arachidonic acid metabol             | BRCA | 0.041797421  |
| UPP2 | Arginine and proline metε            | BRCA | -0.146598538 |
| UPP2 | Arginine biosynthesis                | BRCA | -0.010546646 |
| UPP2 | Ascorbate and aldarate mε            | BRCA | -0.054467917 |
| UPP2 | Atypical memory b cell               | BRCA | -0.087565221 |
| UPP2 | Axl+siglec6+ dendritic ce            | BRCA | -0.038185554 |
| UPP2 | B cell                               | BRCA | -0.119071463 |
| UPP2 | B1 cell                              | BRCA | -0.10075213  |
| UPP2 | Basal cell                           | BRCA | -0.042078685 |
| UPP2 | Beta-alanine metabolism              | BRCA | -0.075589354 |
| UPP2 | Biosynthesis of unsaturate           | BRCA | -0.078959199 |
| UPP2 | Biotin metabolism                    | BRCA | 0.032257744  |
| UPP2 | Butanoate metabolism                 | BRCA | -0.022006779 |
| UPP2 | Caffeine metabolism                  | BRCA | 0.080604004  |
| UPP2 | Cancer stem cell                     | BRCA | -0.117772677 |
| UPP2 | Cancer stem-like cell                | BRCA | -0.028434717 |
| UPP2 | Cd4+ cytotoxic t cell                | BRCA | -0.120564561 |
| UPP2 | Cd4+ memory t cell                   | BRCA | -0.09035361  |
| UPP2 | Cd4+ regulatory t cell               | BRCA | -0.167830263 |
| UPP2 | Cd4+ t helper cell                   | BRCA | -0.121647251 |
| UPP2 | Cd4+cd25+ regulatory t c             | BRCA | -0.133844539 |
| UPP2 | Cd8+ cytotoxic t cell                | BRCA | -0.115816862 |
| UPP2 | Cd8+ regulatory t cell               | BRCA | -0.124780484 |
| UPP2 | Cell_cycle                           | BRCA | -0.151709861 |
| UPP2 | Chandran_metastasis_top <sup>5</sup> | BRCA | -0.096868545 |
| UPP2 | Citrate cycle (tca cycle)            | BRCA | -0.178208892 |
| UPP2 | Cysteine and methionine r            | BRCA | -0.163054405 |
| UPP2 | Cytokine induced killer cε           | BRCA | -0.092908014 |
| UPP2 | D-arginine and d-ornithin            | BRCA | -0.012808222 |
| UPP2 | D-glutamine and d-glutan             | BRCA | 0.056272218  |
| UPP2 | Dendritic cell                       | BRCA | -0.130124409 |
| UPP2 | Dna_repair                           | BRCA | -0.108313131 |
| UPP2 | Dna_replication                      | BRCA | -0.17145315  |
| UPP2 | Double-negative memory               | BRCA | -0.082837528 |
| UPP2 | Drug metabolism - cytoch             | BRCA | 0.092683779  |

|      |                                   |              |
|------|-----------------------------------|--------------|
| UPP2 | Drug metabolism - other (BRCA     | -0.016441757 |
| UPP2 | E2f_targets BRCA                  | -0.178221386 |
| UPP2 | Ecm_receptor_interaction BRCA     | -0.050747163 |
| UPP2 | Effector cd4+ memory t (BRCA      | -0.10822843  |
| UPP2 | Effector cd8+ memory t (BRCA      | -0.156425616 |
| UPP2 | Effector memory t cell BRCA       | -0.101051605 |
| UPP2 | Effector regulatory t (treg BRCA  | -0.15461285  |
| UPP2 | Elvidge_hif1a_targets_up BRCA     | -0.242881925 |
| UPP2 | Endothelial cell BRCA             | -0.096458439 |
| UPP2 | Eosinophil BRCA                   | -0.173274217 |
| UPP2 | Ether lipid metabolism BRCA       | 0.048359298  |
| UPP2 | Exhausted cd4+ t cell BRCA        | -0.151123671 |
| UPP2 | Exhausted cd8+ t cell BRCA        | -0.15534748  |
| UPP2 | Exhausted t cell BRCA             | -0.129585803 |
| UPP2 | Fat cell (adipocyte) BRCA         | 0.043103865  |
| UPP2 | Fatty acid biosynthesis BRCA      | -0.07115646  |
| UPP2 | Fatty acid degradation BRCA       | 0.029292324  |
| UPP2 | Fatty acid elongation BRCA        | 0.035545238  |
| UPP2 | Fibroblast BRCA                   | -0.074398198 |
| UPP2 | Folate biosynthesis BRCA          | -0.003361051 |
| UPP2 | Follicular b cell BRCA            | -0.10715091  |
| UPP2 | Follicular dendritic cell BRCA    | -0.110013508 |
| UPP2 | Follicular helper (tfh) t ce BRCA | -0.140678506 |
| UPP2 | Follicular t cell BRCA            | -0.113229816 |
| UPP2 | Foxp3+il-17+ t cell BRCA          | -0.133012851 |
| UPP2 | Fructose and mannose me BRCA      | -0.141825939 |
| UPP2 | G2m_checkpoint BRCA               | -0.193774911 |
| UPP2 | Galactose metabolism BRCA         | -0.156626041 |
| UPP2 | Galie_tumor_stemness_ge BRCA      | -0.033276739 |
| UPP2 | Glutathione metabolism BRCA       | -0.068776495 |
| UPP2 | Glycerolipid metabolism BRCA      | -0.049615495 |
| UPP2 | Glycerophospholipid metæ BRCA     | 0.073409838  |
| UPP2 | Glycine, serine and threor BRCA   | -0.022949252 |
| UPP2 | Glycolysis / gluconeogene BRCA    | -0.158940228 |
| UPP2 | Glycosaminoglycan biosy1 BRCA     | -0.057705807 |
| UPP2 | Glycosaminoglycan biosy1 BRCA     | -0.059150388 |
| UPP2 | Glycosaminoglycan biosy1 BRCA     | -0.104880464 |
| UPP2 | Glycosaminoglycan degra BRCA      | -0.042335248 |
| UPP2 | Glycosphingolipid biosyn1 BRCA    | -0.124378554 |
| UPP2 | Glycosphingolipid biosyn1 BRCA    | -0.101811204 |
| UPP2 | Glycosphingolipid biosyn1 BRCA    | -0.118297032 |
| UPP2 | Glycosylphosphatidylinos: BRCA    | 0.070362735  |
| UPP2 | Glyoxylate and dicarboxy BRCA     | -0.07068403  |

|      |                             |      |              |
|------|-----------------------------|------|--------------|
| UPP2 | Granulocyte                 | BRCA | -0.151737464 |
| UPP2 | Hedgehog_signaling          | BRCA | -0.068566012 |
| UPP2 | Histidine metabolism        | BRCA | 0.104026324  |
| UPP2 | Hypoxia                     | BRCA | -0.137882642 |
| UPP2 | Il-17alpha t cell           | BRCA | -0.108298024 |
| UPP2 | Il2_stat5_signaling         | BRCA | -0.163353604 |
| UPP2 | Il6_jak_stat3_signaling     | BRCA | -0.168762975 |
| UPP2 | Immune_checkpoints_tun      | BRCA | -0.116319638 |
| UPP2 | Immune_inhibition_cytok     | BRCA | -0.115310404 |
| UPP2 | Inositol phosphate metabo   | BRCA | -0.004766551 |
| UPP2 | Interleukin_6_signaling     | BRCA | -0.094737291 |
| UPP2 | Jaeger_metastasis_up        | BRCA | -0.262890703 |
| UPP2 | Jain_nfkb_signaling         | BRCA | -0.201733619 |
| UPP2 | Kras_signaling_up           | BRCA | -0.104272978 |
| UPP2 | Linoleic acid metabolism    | BRCA | 0.137251241  |
| UPP2 | Lipoic acid metabolism      | BRCA | 0.163766083  |
| UPP2 | Lysine degradation          | BRCA | -0.118476627 |
| UPP2 | Lysosome                    | BRCA | -0.108531902 |
| UPP2 | M1 macrophage               | BRCA | -0.166198651 |
| UPP2 | M2 macrophage               | BRCA | -0.154854209 |
| UPP2 | Mannose type o-glycan bi    | BRCA | -0.005683206 |
| UPP2 | Mapk_signaling_pathway      | BRCA | -0.068448002 |
| UPP2 | Mapk3_erk1_activation       | BRCA | -0.084461038 |
| UPP2 | Marginal zone b cell        | BRCA | -0.118172745 |
| UPP2 | Memory b cell               | BRCA | -0.118066469 |
| UPP2 | Mesenchymal cell            | BRCA | -0.087575181 |
| UPP2 | Mesenchymal stem cell       | BRCA | -0.097205393 |
| UPP2 | Metabolism of xenobiotic    | BRCA | 0.045636875  |
| UPP2 | Migrating cancer stem cel   | BRCA | -0.146186026 |
| UPP2 | Mitotic_spindle             | BRCA | -0.164468685 |
| UPP2 | Monocyte                    | BRCA | -0.131570178 |
| UPP2 | Mtor_signaling_pathway      | BRCA | -0.019028406 |
| UPP2 | Mtorc1_signaling            | BRCA | -0.254103814 |
| UPP2 | Mucin type o-glycan bios    | BRCA | -0.087111988 |
| UPP2 | Myc_targets_v1              | BRCA | -0.193017284 |
| UPP2 | Myeloid cell                | BRCA | -0.143326504 |
| UPP2 | N-glycan biosynthesis       | BRCA | -0.182562148 |
| UPP2 | Naive b cell                | BRCA | -0.082635688 |
| UPP2 | Naive cd4+ t cell           | BRCA | -0.043671834 |
| UPP2 | Naive cd8+ t cell           | BRCA | -0.004263517 |
| UPP2 | Natural killer cell         | BRCA | -0.130777796 |
| UPP2 | Natural killer t (nkt) cell | BRCA | -0.16327113  |
| UPP2 | Natural regulatory t (treg) | BRCA | -0.119230932 |



|      |                            |      |              |
|------|----------------------------|------|--------------|
| UPP2 | Neomycin, kanamycin and    | BRCA | -0.14370414  |
| UPP2 | Neutrophil                 | BRCA | -0.145757246 |
| UPP2 | Nicotinate and nicotinami  | BRCA | -0.014750798 |
| UPP2 | Nitrogen metabolism        | BRCA | 0.119713498  |
| UPP2 | Nod_like_receptor_signal   | BRCA | -0.167796247 |
| UPP2 | Notch_signaling            | BRCA | -0.063302698 |
| UPP2 | One carbon pool by folate  | BRCA | -0.177533002 |
| UPP2 | Other glycan degradation   | BRCA | 0.007668131  |
| UPP2 | Other types of o-glycan b  | BRCA | 0.015728968  |
| UPP2 | Oxidative phosphorylatio   | BRCA | -0.041128236 |
| UPP2 | P53_pathway                | BRCA | -0.04854788  |
| UPP2 | P53_signaling_pathway      | BRCA | -0.187858654 |
| UPP2 | Pantothenate and coa bios  | BRCA | -0.091445113 |
| UPP2 | Pentose and glucuronate in | BRCA | -0.089021294 |
| UPP2 | Pentose phosphate pathwa   | BRCA | -0.175284396 |
| UPP2 | Pericyte                   | BRCA | -0.0437019   |
| UPP2 | Phenylalanine metabolism   | BRCA | 0.035325412  |
| UPP2 | Phenylalanine, tyrosine ar | BRCA | -0.058779368 |
| UPP2 | Phosphonate and phosphir   | BRCA | -0.020456078 |
| UPP2 | Pi3k_akt_activation        | BRCA | 0.040007309  |
| UPP2 | Pi3k_akt_mtor_signaling    | BRCA | -0.262391524 |
| UPP2 | Porphyrin and chlorophyl   | BRCA | -0.123762997 |
| UPP2 | Primary bile acid biosynt  | BRCA | 0.032467537  |
| UPP2 | Propanoate metabolism      | BRCA | -0.022769111 |
| UPP2 | Purine metabolism          | BRCA | -0.184791475 |
| UPP2 | Pyrimidine metabolism      | BRCA | -0.134719456 |
| UPP2 | Pyruvate metabolism        | BRCA | -0.116322296 |
| UPP2 | Regulation_of_autophagy    | BRCA | 0.019947599  |
| UPP2 | Retinol metabolism         | BRCA | 0.035155822  |
| UPP2 | Riboflavin metabolism      | BRCA | -0.062781356 |
| UPP2 | Schmahl_pdgf_signaling     | BRCA | -0.010321218 |
| UPP2 | Selenocompound metabol     | BRCA | -0.060475811 |
| UPP2 | Signaling_by_hippo         | BRCA | -0.059981568 |
| UPP2 | Sphingolipid metabolism    | BRCA | -0.05396272  |
| UPP2 | Starch and sucrose metabo  | BRCA | -0.070719729 |
| UPP2 | Steroid biosynthesis       | BRCA | -0.112354712 |
| UPP2 | Steroid hormone biosynth   | BRCA | -0.000912945 |
| UPP2 | Sulfur metabolism          | BRCA | 0.004123037  |
| UPP2 | Synthesis and degradation  | BRCA | -0.04721186  |
| UPP2 | T helper cell              | BRCA | -0.108870944 |
| UPP2 | T helper1 (th1) cell       | BRCA | -0.147490535 |
| UPP2 | T helper17 (th17) cell     | BRCA | -0.110838834 |
| UPP2 | T helper2 (th2) cell       | BRCA | -0.084058496 |

|      |                            |      |              |
|------|----------------------------|------|--------------|
| UPP2 | T helper9 (th9) cell       | BRCA | -0.08365768  |
| UPP2 | Taurine and hypotaurine r  | BRCA | 0.111517997  |
| UPP2 | Terpenoid backbone biosy   | BRCA | -0.157792535 |
| UPP2 | Tgf_beta_signaling_pathw   | BRCA | -0.032551752 |
| UPP2 | Thiamine metabolism        | BRCA | 0.018476325  |
| UPP2 | Tnfa_signaling_via_nfkb    | BRCA | -0.107151629 |
| UPP2 | Tryptophan metabolism      | BRCA | -0.14612568  |
| UPP2 | Tumor endothelial cell     | BRCA | -0.054052269 |
| UPP2 | Tyrosine metabolism        | BRCA | 0.051089319  |
| UPP2 | Ubiquinone and other terf  | BRCA | -0.011531692 |
| UPP2 | Valine, leucine and isoleu | BRCA | -0.101894129 |
| UPP2 | Valine, leucine and isoleu | BRCA | -0.006206572 |
| UPP2 | Vascular endothelial cell  | BRCA | -0.021976601 |
| UPP2 | Vascular smooth muscle c   | BRCA | 0.069344809  |
| UPP2 | Vegf_signaling_pathway     | BRCA | -0.139224415 |
| UPP2 | Vitamin b6 metabolism      | BRCA | -0.070984649 |
| UPP2 | Willert_wnt_signaling      | BRCA | -0.033727384 |
| UPP2 | Wnt_beta_catenin_signali   | BRCA | 0.00053589   |
| CDA  | Abnormal plasma cell       | CESC | -0.015702202 |
| CDA  | Activated b cell           | CESC | 0.003515912  |
| CDA  | Activated cd4+ t cell      | CESC | 0.033351823  |
| CDA  | Activated t cell           | CESC | -0.000556402 |
| CDA  | Alanine, aspartate and glu | CESC | -0.119192255 |
| CDA  | Alcala_apoptosis           | CESC | 0.12466136   |
| CDA  | Alpha-linolenic acid meta  | CESC | 0.079225811  |
| CDA  | Amino sugar and nucleoti   | CESC | 0.162459526  |
| CDA  | Ampk_pathway               | CESC | -0.190868998 |
| CDA  | Angiogenesis               | CESC | 0.422836885  |
| CDA  | Arachidonic acid metabol:  | CESC | 0.158122773  |
| CDA  | Arginine and proline metæ  | CESC | -0.008926382 |
| CDA  | Arginine biosynthesis      | CESC | -0.001324737 |
| CDA  | Ascorbate and aldarate mε  | CESC | -0.189664182 |
| CDA  | Atypical memory b cell     | CESC | 0.070731403  |
| CDA  | Axl+siglec6+ dendritic ce  | CESC | 0.16235199   |
| CDA  | B cell                     | CESC | -0.077641753 |
| CDA  | B1 cell                    | CESC | -0.065626284 |
| CDA  | Basal cell                 | CESC | 0.234346532  |
| CDA  | Beta-alanine metabolism    | CESC | 0.02187046   |
| CDA  | Biosynthesis of unsaturate | CESC | -0.068143338 |
| CDA  | Biotin metabolism          | CESC | -0.251485102 |
| CDA  | Butanoate metabolism       | CESC | -0.253105548 |
| CDA  | Caffeine metabolism        | CESC | 0.136148619  |
| CDA  | Cancer stem cell           | CESC | 0.273622112  |

|     |                              |      |              |
|-----|------------------------------|------|--------------|
| CDA | Cancer stem-like cell        | CESC | -0.109976155 |
| CDA | Cd4+ cytotoxic t cell        | CESC | 0.125744276  |
| CDA | Cd4+ memory t cell           | CESC | 0.02307103   |
| CDA | Cd4+ regulatory t cell       | CESC | 0.072328927  |
| CDA | Cd4+ t helper cell           | CESC | 0.035541368  |
| CDA | Cd4+cd25+ regulatory t c     | CESC | 0.039006104  |
| CDA | Cd8+ cytotoxic t cell        | CESC | 0.053563182  |
| CDA | Cd8+ regulatory t cell       | CESC | -0.005984034 |
| CDA | Cell_cycle                   | CESC | -0.144243234 |
| CDA | Chandran_metastasis_top5     | CESC | -0.076475641 |
| CDA | Citrate cycle (tca cycle)    | CESC | -0.042707967 |
| CDA | Cysteine and methionine r    | CESC | -0.202638179 |
| CDA | Cytokine induced killer c    | CESC | -0.000290427 |
| CDA | D-arginine and d-ornithin    | CESC | 0.023268782  |
| CDA | D-glutamine and d-glutan     | CESC | 0.001924531  |
| CDA | Dendritic cell               | CESC | 0.187601552  |
| CDA | Dna_repair                   | CESC | 0.004634131  |
| CDA | Dna_replication              | CESC | -0.206194898 |
| CDA | Double-negative memory       | CESC | -0.030517566 |
| CDA | Drug metabolism - cytoch     | CESC | -0.116970492 |
| CDA | Drug metabolism - other (    | CESC | 0.120006707  |
| CDA | E2f_targets                  | CESC | -0.24498032  |
| CDA | Ecm_receptor_interaction     | CESC | 0.346449708  |
| CDA | Effector cd4+ memory t (     | CESC | -0.019427159 |
| CDA | Effector cd8+ memory t (     | CESC | 0.200463185  |
| CDA | Effector memory t cell       | CESC | 0.014644951  |
| CDA | Effector regulatory t (treg  | CESC | 0.071075222  |
| CDA | Elvidge_hif1a_targets_up     | CESC | 0.093815324  |
| CDA | Endothelial cell             | CESC | 0.147690805  |
| CDA | Eosinophil                   | CESC | 0.104474102  |
| CDA | Ether lipid metabolism       | CESC | 0.183965515  |
| CDA | Exhausted cd4+ t cell        | CESC | 0.073092036  |
| CDA | Exhausted cd8+ t cell        | CESC | 0.088991678  |
| CDA | Exhausted t cell             | CESC | 0.018783657  |
| CDA | Fat cell (adipocyte)         | CESC | 0.200111669  |
| CDA | Fatty acid biosynthesis      | CESC | -0.003934556 |
| CDA | Fatty acid degradation       | CESC | -0.237251266 |
| CDA | Fatty acid elongation        | CESC | 0.155462372  |
| CDA | Fibroblast                   | CESC | 0.268780236  |
| CDA | Folate biosynthesis          | CESC | 0.1391057    |
| CDA | Follicular b cell            | CESC | -0.005736352 |
| CDA | Follicular dendritic cell    | CESC | 0.046167223  |
| CDA | Follicular helper (tfh) t ce | CESC | 0.091910394  |

|     |                            |      |              |
|-----|----------------------------|------|--------------|
| CDA | Follicular t cell          | CESC | 0.026175416  |
| CDA | Foxp3+il-17+ t cell        | CESC | -0.025943692 |
| CDA | Fructose and mannose me    | CESC | 0.187704068  |
| CDA | G2m_checkpoint             | CESC | -0.18781091  |
| CDA | Galactose metabolism       | CESC | 0.260748023  |
| CDA | Galie_tumor_stemness_ge    | CESC | 0.177326168  |
| CDA | Glutathione metabolism     | CESC | -0.086609359 |
| CDA | Glycerolipid metabolism    | CESC | 0.070679648  |
| CDA | Glycerophospholipid metæ   | CESC | 0.133635502  |
| CDA | Glycine, serine and threor | CESC | -0.073047197 |
| CDA | Glycolysis / gluconeogene  | CESC | 0.079267753  |
| CDA | Glycosaminoglycan biosy1   | CESC | 0.323194381  |
| CDA | Glycosaminoglycan biosy1   | CESC | 0.11415539   |
| CDA | Glycosaminoglycan biosy1   | CESC | 0.10798854   |
| CDA | Glycosaminoglycan degra    | CESC | 0.112617413  |
| CDA | Glycosphingolipid biosyn1  | CESC | 0.08022017   |
| CDA | Glycosphingolipid biosyn1  | CESC | 0.21755984   |
| CDA | Glycosphingolipid biosyn1  | CESC | 0.068934193  |
| CDA | Glycosylphosphatidylinos:  | CESC | -0.155617409 |
| CDA | Glyoxylate and dicarboxy   | CESC | -0.194500214 |
| CDA | Granulocyte                | CESC | 0.118966858  |
| CDA | Hedgehog_signaling         | CESC | 0.069319728  |
| CDA | Histidine metabolism       | CESC | 0.114058105  |
| CDA | Hypoxia                    | CESC | 0.34634766   |
| CDA | Il-17ralpha t cell         | CESC | 0.043502202  |
| CDA | Il2_stat5_signaling        | CESC | 0.290361957  |
| CDA | Il6_jak_stat3_signaling    | CESC | 0.229577943  |
| CDA | Immune_checkpoints_tunr    | CESC | 0.17565955   |
| CDA | Immune_inhibition_cytok    | CESC | 0.257327604  |
| CDA | Inositol phosphate metabo  | CESC | -0.169671836 |
| CDA | Interleukin_6_signaling    | CESC | 0.063581896  |
| CDA | Jaeger_metastasis_up       | CESC | 0.004696545  |
| CDA | Jain_nfkb_signaling        | CESC | 0.030410582  |
| CDA | Kras_signaling_up          | CESC | 0.329430057  |
| CDA | Linoleic acid metabolism   | CESC | -0.03784769  |
| CDA | Lipoic acid metabolism     | CESC | -0.124507697 |
| CDA | Lysine degradation         | CESC | -0.357477044 |
| CDA | Lysosome                   | CESC | 0.159851365  |
| CDA | M1 macrophage              | CESC | 0.135295351  |
| CDA | M2 macrophage              | CESC | 0.228097651  |
| CDA | Mannose type o-glycan bi   | CESC | 0.024089755  |
| CDA | Mapk_signaling_pathway     | CESC | 0.184454994  |
| CDA | Mapk3_erk1_activation      | CESC | 0.056676784  |

|     |                                                   |      |              |
|-----|---------------------------------------------------|------|--------------|
| CDA | Marginal zone b cell                              | CESC | -0.036925797 |
| CDA | Memory b cell                                     | CESC | -0.068294353 |
| CDA | Mesenchymal cell                                  | CESC | 0.318124214  |
| CDA | Mesenchymal stem cell                             | CESC | 0.239744663  |
| CDA | Metabolism of xenobiotics                         | CESC | -0.127054558 |
| CDA | Migrating cancer stem cell                        | CESC | 0.097841985  |
| CDA | Mitotic_spindle                                   | CESC | -0.076970975 |
| CDA | Monocyte                                          | CESC | 0.28026986   |
| CDA | Mtor_signaling_pathway                            | CESC | -0.089146273 |
| CDA | Mtorc1_signaling                                  | CESC | 0.081721781  |
| CDA | Mucin type o-glycan biosynthesis                  | CESC | 0.14604047   |
| CDA | Myc_targets_v1                                    | CESC | 0.078665297  |
| CDA | Myeloid cell                                      | CESC | 0.083712598  |
| CDA | N-glycan biosynthesis                             | CESC | -0.033202992 |
| CDA | Naive b cell                                      | CESC | 0.012947349  |
| CDA | Naive cd4+ t cell                                 | CESC | 0.008245662  |
| CDA | Naive cd8+ t cell                                 | CESC | 0.033314284  |
| CDA | Natural killer cell                               | CESC | 0.092567821  |
| CDA | Natural killer t (nkt) cell                       | CESC | -0.087894486 |
| CDA | Natural regulatory t (treg) cell                  | CESC | 0.05496888   |
| CDA | Neomycin, kanamycin and streptomycin              | CESC | 0.334597362  |
| CDA | Neutrophil                                        | CESC | 0.451324984  |
| CDA | Nicotinate and nicotinamide metabolism            | CESC | 0.151529633  |
| CDA | Nitrogen metabolism                               | CESC | 0.045630732  |
| CDA | Nod_like_receptor_signaling                       | CESC | 0.233091321  |
| CDA | Notch_signaling                                   | CESC | 0.245604177  |
| CDA | One carbon pool by folate                         | CESC | -0.14180831  |
| CDA | Other glycan degradation                          | CESC | -0.021958278 |
| CDA | Other types of o-glycan biosynthesis              | CESC | 0.037478349  |
| CDA | Oxidative phosphorylation                         | CESC | 0.069067486  |
| CDA | P53_pathway                                       | CESC | 0.268531045  |
| CDA | P53_signaling_pathway                             | CESC | 0.020681864  |
| CDA | Pantothenate and coa biosynthesis                 | CESC | -0.007825895 |
| CDA | Pentose and glucuronate interconversions          | CESC | -0.1490488   |
| CDA | Pentose phosphate pathway                         | CESC | 0.078466281  |
| CDA | Pericyte                                          | CESC | 0.307384767  |
| CDA | Phenylalanine metabolism                          | CESC | 0.21819421   |
| CDA | Phenylalanine, tyrosine and tryptophan metabolism | CESC | -0.017408801 |
| CDA | Phosphonate and phosphite metabolism              | CESC | -0.061224944 |
| CDA | Pi3k_akt_activation                               | CESC | -0.078021488 |
| CDA | Pi3k_akt_mtor_signaling                           | CESC | 0.09727062   |
| CDA | Porphyrin and chlorophyll metabolism              | CESC | -0.055539404 |
| CDA | Primary bile acid biosynthesis                    | CESC | 0.029630115  |

|      |                            |      |              |
|------|----------------------------|------|--------------|
| CDA  | Propanoate metabolism      | CESC | -0.297112514 |
| CDA  | Purine metabolism          | CESC | 0.080503038  |
| CDA  | Pyrimidine metabolism      | CESC | 0.040812708  |
| CDA  | Pyruvate metabolism        | CESC | -0.169769752 |
| CDA  | Regulation_of_autophagy    | CESC | -0.253827257 |
| CDA  | Retinol metabolism         | CESC | 0.027419658  |
| CDA  | Riboflavin metabolism      | CESC | -0.008862061 |
| CDA  | Schmahl_pdgf_signaling     | CESC | 0.011637905  |
| CDA  | Selenocompound metabol     | CESC | -0.293079717 |
| CDA  | Signaling_by_hippo         | CESC | 0.04468504   |
| CDA  | Sphingolipid metabolism    | CESC | 0.011354876  |
| CDA  | Starch and sucrose metabo  | CESC | 0.156717845  |
| CDA  | Steroid biosynthesis       | CESC | -0.065559383 |
| CDA  | Steroid hormone biosynth   | CESC | 0.067026511  |
| CDA  | Sulfur metabolism          | CESC | 0.058407925  |
| CDA  | Synthesis and degradation  | CESC | -0.091903195 |
| CDA  | T helper cell              | CESC | 0.063520522  |
| CDA  | T helper1 (th1) cell       | CESC | 0.128812148  |
| CDA  | T helper17 (th17) cell     | CESC | 0.246038299  |
| CDA  | T helper2 (th2) cell       | CESC | 0.118244842  |
| CDA  | T helper9 (th9) cell       | CESC | 0.086529795  |
| CDA  | Taurine and hypotaurine r  | CESC | -0.203635757 |
| CDA  | Terpenoid backbone biosy   | CESC | -0.066250525 |
| CDA  | Tgf_beta_signaling_pathw   | CESC | 0.139451594  |
| CDA  | Thiamine metabolism        | CESC | 0.09729646   |
| CDA  | Tnfa_signaling_via_nfbk    | CESC | 0.280837485  |
| CDA  | Tryptophan metabolism      | CESC | -0.1568866   |
| CDA  | Tumor endothelial cell     | CESC | 0.303738676  |
| CDA  | Tyrosine metabolism        | CESC | 0.089756589  |
| CDA  | Ubiquinone and other terf  | CESC | -0.11101703  |
| CDA  | Valine, leucine and isoleu | CESC | 0.13150565   |
| CDA  | Valine, leucine and isoleu | CESC | -0.267937179 |
| CDA  | Vascular endothelial cell  | CESC | 0.181151708  |
| CDA  | Vascular smooth muscle c   | CESC | 0.100923589  |
| CDA  | Vegf_signaling_pathway     | CESC | 0.108714988  |
| CDA  | Vitamin b6 metabolism      | CESC | -0.057964888 |
| CDA  | Willert_wnt_signaling      | CESC | 0.168256812  |
| CDA  | Wnt_beta_catenin_signali   | CESC | 0.098845539  |
| UCK1 | Abnormal plasma cell       | CESC | 0.060756049  |
| UCK1 | Activated b cell           | CESC | 0.184737666  |
| UCK1 | Activated cd4+ t cell      | CESC | 0.117249939  |
| UCK1 | Activated t cell           | CESC | 0.190174667  |
| UCK1 | Alanine, aspartate and glu | CESC | -0.093096969 |

|      |                                      |      |              |
|------|--------------------------------------|------|--------------|
| UCK1 | Alcala_apoptosis                     | CESC | 0.259686215  |
| UCK1 | Alpha-linolenic acid meta            | CESC | 0.069934401  |
| UCK1 | Amino sugar and nucleoti             | CESC | 0.082755226  |
| UCK1 | Ampk_pathway                         | CESC | -0.089939423 |
| UCK1 | Angiogenesis                         | CESC | -0.204688595 |
| UCK1 | Arachidonic acid metabol             | CESC | 0.147101545  |
| UCK1 | Arginine and proline metæ            | CESC | 0.120832975  |
| UCK1 | Arginine biosynthesis                | CESC | -0.122079077 |
| UCK1 | Ascorbate and aldarate mε            | CESC | 0.060123114  |
| UCK1 | Atypical memory b cell               | CESC | 0.007307584  |
| UCK1 | Axl+siglec6+ dendritic ce            | CESC | 0.041170543  |
| UCK1 | B cell                               | CESC | 0.094686485  |
| UCK1 | B1 cell                              | CESC | 0.155066543  |
| UCK1 | Basal cell                           | CESC | -0.017265793 |
| UCK1 | Beta-alanine metabolism              | CESC | 0.095209672  |
| UCK1 | Biosynthesis of unsaturate           | CESC | 0.066436236  |
| UCK1 | Biotin metabolism                    | CESC | 0.080544991  |
| UCK1 | Butanoate metabolism                 | CESC | 0.232468592  |
| UCK1 | Caffeine metabolism                  | CESC | -0.123380908 |
| UCK1 | Cancer stem cell                     | CESC | -0.239029605 |
| UCK1 | Cancer stem-like cell                | CESC | -0.11479516  |
| UCK1 | Cd4+ cytotoxic t cell                | CESC | 0.180677671  |
| UCK1 | Cd4+ memory t cell                   | CESC | 0.088931099  |
| UCK1 | Cd4+ regulatory t cell               | CESC | 0.132099741  |
| UCK1 | Cd4+ t helper cell                   | CESC | 0.167375437  |
| UCK1 | Cd4+cd25+ regulatory t c             | CESC | 0.161410145  |
| UCK1 | Cd8+ cytotoxic t cell                | CESC | 0.21457913   |
| UCK1 | Cd8+ regulatory t cell               | CESC | 0.154591594  |
| UCK1 | Cell_cycle                           | CESC | -0.200095973 |
| UCK1 | Chandran_metastasis_top <sup>5</sup> | CESC | -0.279541934 |
| UCK1 | Citrate cycle (tca cycle)            | CESC | 0.040619905  |
| UCK1 | Cysteine and methionine r            | CESC | 0.026933703  |
| UCK1 | Cytokine induced killer cε           | CESC | 0.263325544  |
| UCK1 | D-arginine and d-ornithin            | CESC | 0.142238586  |
| UCK1 | D-glutamine and d-glutan             | CESC | -0.226765738 |
| UCK1 | Dendritic cell                       | CESC | 0.071154976  |
| UCK1 | Dna_repair                           | CESC | 0.340708701  |
| UCK1 | Dna_replication                      | CESC | 0.172698776  |
| UCK1 | Double-negative memory               | CESC | 0.24775847   |
| UCK1 | Drug metabolism - cytoch             | CESC | 0.098346698  |
| UCK1 | Drug metabolism - other ε            | CESC | 0.215319874  |
| UCK1 | E2f_targets                          | CESC | -0.114736277 |
| UCK1 | Ecm_receptor_interaction             | CESC | -0.268306158 |

|      |                                   |              |
|------|-----------------------------------|--------------|
| UCK1 | Effector cd4+ memory t ( CESC     | 0.01077668   |
| UCK1 | Effector cd8+ memory t ( CESC     | 0.051115326  |
| UCK1 | Effector memory t cell CESC       | 0.091893652  |
| UCK1 | Effector regulatory t (treg CESC  | 0.089855117  |
| UCK1 | Elvidge_hif1a_targets_up CESC     | -0.31692164  |
| UCK1 | Endothelial cell CESC             | -0.113760708 |
| UCK1 | Eosinophil CESC                   | 0.123576486  |
| UCK1 | Ether lipid metabolism CESC       | -0.034010052 |
| UCK1 | Exhausted cd4+ t cell CESC        | 0.088946281  |
| UCK1 | Exhausted cd8+ t cell CESC        | 0.105906945  |
| UCK1 | Exhausted t cell CESC             | 0.230759135  |
| UCK1 | Fat cell (adipocyte) CESC         | 0.071261529  |
| UCK1 | Fatty acid biosynthesis CESC      | -0.072493952 |
| UCK1 | Fatty acid degradation CESC       | 0.170267941  |
| UCK1 | Fatty acid elongation CESC        | 0.036713038  |
| UCK1 | Fibroblast CESC                   | -0.139322756 |
| UCK1 | Folate biosynthesis CESC          | 0.208980956  |
| UCK1 | Follicular b cell CESC            | 0.090316702  |
| UCK1 | Follicular dendritic cell CESC    | -0.02203353  |
| UCK1 | Follicular helper (tfh) t ce CESC | 0.114107172  |
| UCK1 | Follicular t cell CESC            | 0.208367941  |
| UCK1 | Foxp3+il-17+ t cell CESC          | 0.128618083  |
| UCK1 | Fructose and mannose me CESC      | 0.028919037  |
| UCK1 | G2m_checkpoint CESC               | -0.297913595 |
| UCK1 | Galactose metabolism CESC         | 0.058515559  |
| UCK1 | Galie_tumor_stemness_ge CESC      | -0.191677322 |
| UCK1 | Glutathione metabolism CESC       | 0.198496031  |
| UCK1 | Glycerolipid metabolism CESC      | 0.034288845  |
| UCK1 | Glycerophospholipid metæ CESC     | 0.140251001  |
| UCK1 | Glycine, serine and threor CESC   | 0.279686946  |
| UCK1 | Glycolysis / gluconeogene CESC    | 0.009552063  |
| UCK1 | Glycosaminoglycan biosy1 CESC     | 0.012187127  |
| UCK1 | Glycosaminoglycan biosy1 CESC     | -0.130051473 |
| UCK1 | Glycosaminoglycan biosy1 CESC     | -0.151085885 |
| UCK1 | Glycosaminoglycan degra CESC      | 0.081587594  |
| UCK1 | Glycosphingolipid biosyn1 CESC    | 0.108743151  |
| UCK1 | Glycosphingolipid biosyn1 CESC    | 0.128723805  |
| UCK1 | Glycosphingolipid biosyn1 CESC    | -0.131973404 |
| UCK1 | Glycosylphosphatidylinos: CESC    | 0.194517614  |
| UCK1 | Glyoxylate and dicarboxy CESC     | 0.228572727  |
| UCK1 | Granulocyte CESC                  | 0.06911989   |
| UCK1 | Hedgehog_signaling CESC           | -0.27915286  |
| UCK1 | Histidine metabolism CESC         | 0.082739228  |



|      |                             |      |              |
|------|-----------------------------|------|--------------|
| UCK1 | Hypoxia                     | CESC | -0.115813165 |
| UCK1 | Il-17alpha t cell           | CESC | 0.174188382  |
| UCK1 | Il2_stat5_signaling         | CESC | -0.057347641 |
| UCK1 | Il6_jak_stat3_signaling     | CESC | -0.068799073 |
| UCK1 | Immune_checkpoints_tun      | CESC | 0.081448977  |
| UCK1 | Immune_inhibition_cytok     | CESC | 0.024486965  |
| UCK1 | Inositol phosphate metabo   | CESC | -0.249830724 |
| UCK1 | Interleukin_6_signaling     | CESC | -0.308794563 |
| UCK1 | Jaeger_metastasis_up        | CESC | -0.100544307 |
| UCK1 | Jain_nfkb_signaling         | CESC | -0.063942666 |
| UCK1 | Kras_signaling_up           | CESC | -0.163017157 |
| UCK1 | Linoleic acid metabolism    | CESC | 0.054538586  |
| UCK1 | Lipoic acid metabolism      | CESC | 0.243430615  |
| UCK1 | Lysine degradation          | CESC | 0.046819162  |
| UCK1 | Lysosome                    | CESC | 0.178862171  |
| UCK1 | M1 macrophage               | CESC | 0.052883312  |
| UCK1 | M2 macrophage               | CESC | 0.053509183  |
| UCK1 | Mannose type o-glycan bi    | CESC | 0.049861063  |
| UCK1 | Mapk_signaling_pathway      | CESC | -0.290309307 |
| UCK1 | Mapk3_erk1_activation       | CESC | -0.336137693 |
| UCK1 | Marginal zone b cell        | CESC | 0.053306387  |
| UCK1 | Memory b cell               | CESC | 0.223502189  |
| UCK1 | Mesenchymal cell            | CESC | -0.089991976 |
| UCK1 | Mesenchymal stem cell       | CESC | -0.133401395 |
| UCK1 | Metabolism of xenobiotic    | CESC | 0.143710437  |
| UCK1 | Migrating cancer stem cel   | CESC | -0.143694594 |
| UCK1 | Mitotic_spindle             | CESC | -0.436490848 |
| UCK1 | Monocyte                    | CESC | 0.03854161   |
| UCK1 | Mtor_signaling_pathway      | CESC | -0.150043768 |
| UCK1 | Mtorc1_signaling            | CESC | -0.112096848 |
| UCK1 | Mucin type o-glycan biosy   | CESC | -0.341297587 |
| UCK1 | Myc_targets_v1              | CESC | 0.058176292  |
| UCK1 | Myeloid cell                | CESC | 0.081966722  |
| UCK1 | N-glycan biosynthesis       | CESC | 0.035686491  |
| UCK1 | Naive b cell                | CESC | 0.136206131  |
| UCK1 | Naive cd4+ t cell           | CESC | -0.014384677 |
| UCK1 | Naive cd8+ t cell           | CESC | -0.06042002  |
| UCK1 | Natural killer cell         | CESC | 0.160843567  |
| UCK1 | Natural killer t (nkt) cell | CESC | 0.214621699  |
| UCK1 | Natural regulatory t (treg) | CESC | 0.042139624  |
| UCK1 | Neomycin, kanamycin and     | CESC | -0.118628617 |
| UCK1 | Neutrophil                  | CESC | -0.112037074 |
| UCK1 | Nicotinate and nicotinami   | CESC | -0.009835124 |

|      |                            |      |              |
|------|----------------------------|------|--------------|
| UCK1 | Nitrogen metabolism        | CESC | -0.139071709 |
| UCK1 | Nod_like_receptor_signal   | CESC | -0.157965633 |
| UCK1 | Notch_signaling            | CESC | -0.135770645 |
| UCK1 | One carbon pool by folate  | CESC | 0.028473846  |
| UCK1 | Other glycan degradation   | CESC | 0.137015071  |
| UCK1 | Other types of o-glycan b  | CESC | 0.077800224  |
| UCK1 | Oxidative phosphorylatio   | CESC | 0.388893673  |
| UCK1 | P53_pathway                | CESC | 0.033033419  |
| UCK1 | P53_signaling_pathway      | CESC | -0.200580391 |
| UCK1 | Pantothenate and coa bios  | CESC | 0.097702266  |
| UCK1 | Pentose and glucuronate in | CESC | 0.066698901  |
| UCK1 | Pentose phosphate pathwa   | CESC | 0.119503462  |
| UCK1 | Pericyte                   | CESC | -0.138277155 |
| UCK1 | Phenylalanine metabolism   | CESC | 0.020824319  |
| UCK1 | Phenylalanine, tyrosine ar | CESC | 0.070632655  |
| UCK1 | Phosphonate and phosphir   | CESC | -0.000388625 |
| UCK1 | Pi3k_akt_activation        | CESC | -0.248944568 |
| UCK1 | Pi3k_akt_mtor_signaling    | CESC | -0.129677185 |
| UCK1 | Porphyrin and chlorophyl   | CESC | 0.233082224  |
| UCK1 | Primary bile acid biosynt  | CESC | 0.072425843  |
| UCK1 | Propanoate metabolism      | CESC | 0.018610847  |
| UCK1 | Purine metabolism          | CESC | 0.09478037   |
| UCK1 | Pyrimidine metabolism      | CESC | 0.161582195  |
| UCK1 | Pyruvate metabolism        | CESC | 0.164638748  |
| UCK1 | Regulation_of_autophagy    | CESC | 0.175961594  |
| UCK1 | Retinol metabolism         | CESC | 0.037131918  |
| UCK1 | Riboflavin metabolism      | CESC | 0.211633817  |
| UCK1 | Schmahl_pdgf_signaling     | CESC | -0.282605417 |
| UCK1 | Selenocompound metabol     | CESC | -0.037376065 |
| UCK1 | Signaling_by_hippo         | CESC | -0.436844998 |
| UCK1 | Sphingolipid metabolism    | CESC | -0.21184864  |
| UCK1 | Starch and sucrose metabo  | CESC | 0.01866182   |
| UCK1 | Steroid biosynthesis       | CESC | 0.004249598  |
| UCK1 | Steroid hormone biosynth   | CESC | 0.03305698   |
| UCK1 | Sulfur metabolism          | CESC | -0.058973684 |
| UCK1 | Synthesis and degradation  | CESC | 0.122143752  |
| UCK1 | T helper cell              | CESC | 0.115393607  |
| UCK1 | T helper1 (th1) cell       | CESC | 0.148130091  |
| UCK1 | T helper17 (th17) cell     | CESC | -0.020067988 |
| UCK1 | T helper2 (th2) cell       | CESC | 0.134780992  |
| UCK1 | T helper9 (th9) cell       | CESC | 0.172180522  |
| UCK1 | Taurine and hypotaurine r  | CESC | 0.149290477  |
| UCK1 | Terpenoid backbone biosy   | CESC | 0.014623995  |

|      |                            |     |              |
|------|----------------------------|-----|--------------|
| UCK1 | Tgf_beta_signaling_pathway | CEC | -0.386214673 |
| UCK1 | Thiamine metabolism        | CEC | 0.2213173    |
| UCK1 | Tnfa_signaling_via_nfk     | CEC | -0.144016424 |
| UCK1 | Tryptophan metabolism      | CEC | 0.342866105  |
| UCK1 | Tumor endothelial cell     | CEC | -0.049760534 |
| UCK1 | Tyrosine metabolism        | CEC | 0.124648086  |
| UCK1 | Ubiquinone and other ter   | CEC | 0.216719187  |
| UCK1 | Valine, leucine and isoleu | CEC | 0.199096945  |
| UCK1 | Valine, leucine and isoleu | CEC | 0.141421435  |
| UCK1 | Vascular endothelial cell  | CEC | -0.045323511 |
| UCK1 | Vascular smooth muscle c   | CEC | -0.087804347 |
| UCK1 | Vegf_signaling_pathway     | CEC | -0.180608062 |
| UCK1 | Vitamin b6 metabolism      | CEC | 0.275453232  |
| UCK1 | Willert_wnt_signaling      | CEC | 0.039935     |
| UCK1 | Wnt_beta_catenin_signali   | CEC | -0.196099189 |
| UCK2 | Abnormal plasma cell       | CEC | -0.040155173 |
| UCK2 | Activated b cell           | CEC | 0.085704665  |
| UCK2 | Activated cd4+ t cell      | CEC | 0.049748206  |
| UCK2 | Activated t cell           | CEC | 0.006417626  |
| UCK2 | Alanine, aspartate and glu | CEC | 0.126646621  |
| UCK2 | Alcala_apoptosis           | CEC | 0.306847295  |
| UCK2 | Alpha-linolenic acid meta  | CEC | 0.004445042  |
| UCK2 | Amino sugar and nucleoti   | CEC | 0.110323355  |
| UCK2 | Ampk_pathway               | CEC | -0.052314733 |
| UCK2 | Angiogenesis               | CEC | 0.056982333  |
| UCK2 | Arachidonic acid metabol   | CEC | 0.047322406  |
| UCK2 | Arginine and proline met   | CEC | 0.167264347  |
| UCK2 | Arginine biosynthesis      | CEC | 0.079025319  |
| UCK2 | Ascorbate and aldarate m   | CEC | -0.007302975 |
| UCK2 | Atypical memory b cell     | CEC | 0.032467904  |
| UCK2 | Axl+siglec6+ dendritic ce  | CEC | -0.101168366 |
| UCK2 | B cell                     | CEC | -0.185831271 |
| UCK2 | B1 cell                    | CEC | -0.002773029 |
| UCK2 | Basal cell                 | CEC | 0.296503682  |
| UCK2 | Beta-alanine metabolism    | CEC | 0.032310111  |
| UCK2 | Biosynthesis of unsaturate | CEC | 0.019814809  |
| UCK2 | Biotin metabolism          | CEC | -0.061906869 |
| UCK2 | Butanoate metabolism       | CEC | -0.084937694 |
| UCK2 | Caffeine metabolism        | CEC | -0.138275667 |
| UCK2 | Cancer stem cell           | CEC | -0.010428142 |
| UCK2 | Cancer stem-like cell      | CEC | -0.311689942 |
| UCK2 | Cd4+ cytotoxic t cell      | CEC | 0.018881744  |
| UCK2 | Cd4+ memory t cell         | CEC | -0.003907705 |

|      |                              |      |              |
|------|------------------------------|------|--------------|
| UCK2 | Cd4+ regulatory t cell       | CESC | 0.078765791  |
| UCK2 | Cd4+ t helper cell           | CESC | 0.005138752  |
| UCK2 | Cd4+cd25+ regulatory t c     | CESC | 0.019910257  |
| UCK2 | Cd8+ cytotoxic t cell        | CESC | 0.062335578  |
| UCK2 | Cd8+ regulatory t cell       | CESC | 0.021305184  |
| UCK2 | Cell_cycle                   | CESC | 0.213047632  |
| UCK2 | Chandran_metastasis_top5     | CESC | 0.238879931  |
| UCK2 | Citrate cycle (tca cycle)    | CESC | 0.218607656  |
| UCK2 | Cysteine and methionine r    | CESC | 0.1246921    |
| UCK2 | Cytokine induced killer c    | CESC | -0.021554466 |
| UCK2 | D-arginine and d-ornithin    | CESC | 0.036342588  |
| UCK2 | D-glutamine and d-glutan     | CESC | 0.12222648   |
| UCK2 | Dendritic cell               | CESC | 0.127774722  |
| UCK2 | Dna_repair                   | CESC | 0.308188904  |
| UCK2 | Dna_replication              | CESC | 0.138783526  |
| UCK2 | Double-negative memory       | CESC | -0.019803778 |
| UCK2 | Drug metabolism - cytoch     | CESC | -0.009863234 |
| UCK2 | Drug metabolism - other (    | CESC | 0.377667777  |
| UCK2 | E2f_targets                  | CESC | 0.172530282  |
| UCK2 | Ecm_receptor_interaction     | CESC | -0.054241674 |
| UCK2 | Effector cd4+ memory t (     | CESC | -0.023668934 |
| UCK2 | Effector cd8+ memory t (     | CESC | 0.065779437  |
| UCK2 | Effector memory t cell       | CESC | -0.006812822 |
| UCK2 | Effector regulatory t (treg  | CESC | 0.022104899  |
| UCK2 | Elvidge_hif1a_targets_up     | CESC | 0.400339035  |
| UCK2 | Endothelial cell             | CESC | -0.116271156 |
| UCK2 | Eosinophil                   | CESC | 0.04903177   |
| UCK2 | Ether lipid metabolism       | CESC | -0.042323942 |
| UCK2 | Exhausted cd4+ t cell        | CESC | -0.012628876 |
| UCK2 | Exhausted cd8+ t cell        | CESC | -0.029630623 |
| UCK2 | Exhausted t cell             | CESC | 0.036720222  |
| UCK2 | Fat cell (adipocyte)         | CESC | 0.048640229  |
| UCK2 | Fatty acid biosynthesis      | CESC | 0.065970819  |
| UCK2 | Fatty acid degradation       | CESC | -0.115465164 |
| UCK2 | Fatty acid elongation        | CESC | 0.275468041  |
| UCK2 | Fibroblast                   | CESC | -0.025073576 |
| UCK2 | Folate biosynthesis          | CESC | 0.222742084  |
| UCK2 | Follicular b cell            | CESC | -0.005300955 |
| UCK2 | Follicular dendritic cell    | CESC | -0.090754371 |
| UCK2 | Follicular helper (tfh) t ce | CESC | 0.109462084  |
| UCK2 | Follicular t cell            | CESC | 0.033996765  |
| UCK2 | Foxp3+il-17+ t cell          | CESC | 0.063365073  |
| UCK2 | Fructose and mannose me      | CESC | 0.189177729  |

|      |                            |      |              |
|------|----------------------------|------|--------------|
| UCK2 | G2m_checkpoint             | CESC | 0.169561424  |
| UCK2 | Galactose metabolism       | CESC | 0.244879947  |
| UCK2 | Galie_tumor_stemness_ge    | CESC | -0.232980343 |
| UCK2 | Glutathione metabolism     | CESC | 0.12932781   |
| UCK2 | Glycerolipid metabolism    | CESC | -0.068112269 |
| UCK2 | Glycerophospholipid metæ   | CESC | -0.00300205  |
| UCK2 | Glycine, serine and threor | CESC | 0.019216044  |
| UCK2 | Glycolysis / gluconeogene  | CESC | 0.182789716  |
| UCK2 | Glycosaminoglycan biosy1   | CESC | 0.087251532  |
| UCK2 | Glycosaminoglycan biosy1   | CESC | 0.019607419  |
| UCK2 | Glycosaminoglycan biosy1   | CESC | -0.127202404 |
| UCK2 | Glycosaminoglycan degra    | CESC | -0.155682322 |
| UCK2 | Glycosphingolipid biosyn1  | CESC | -0.197639997 |
| UCK2 | Glycosphingolipid biosyn1  | CESC | -0.219803313 |
| UCK2 | Glycosphingolipid biosyn1  | CESC | -0.141621723 |
| UCK2 | Glycosylphosphatidylinos:  | CESC | 0.06110329   |
| UCK2 | Glyoxylate and dicarboxy   | CESC | 0.095840902  |
| UCK2 | Granulocyte                | CESC | 0.040067163  |
| UCK2 | Hedgehog_signaling         | CESC | -0.099218305 |
| UCK2 | Histidine metabolism       | CESC | -0.036265369 |
| UCK2 | Hypoxia                    | CESC | 0.184258815  |
| UCK2 | Il-17alpha t cell          | CESC | -0.000411237 |
| UCK2 | Il2_stat5_signaling        | CESC | 0.135934835  |
| UCK2 | Il6_jak_stat3_signaling    | CESC | 0.097511428  |
| UCK2 | Immune_checkpoints_tun     | CESC | -0.044004254 |
| UCK2 | Immune_inhibition_cytok    | CESC | 0.115198308  |
| UCK2 | Inositol phosphate metabo  | CESC | -0.214357496 |
| UCK2 | Interleukin_6_signaling    | CESC | -0.051053167 |
| UCK2 | Jaeger_metastasis_up       | CESC | 0.092771351  |
| UCK2 | Jain_nfkb_signaling        | CESC | 0.490839371  |
| UCK2 | Kras_signaling_up          | CESC | -0.041189763 |
| UCK2 | Linoleic acid metabolism   | CESC | -0.050887279 |
| UCK2 | Lipoic acid metabolism     | CESC | -0.046872342 |
| UCK2 | Lysine degradation         | CESC | 0.00083851   |
| UCK2 | Lysosome                   | CESC | -0.123108474 |
| UCK2 | M1 macrophage              | CESC | 0.155355846  |
| UCK2 | M2 macrophage              | CESC | 0.196813068  |
| UCK2 | Mannose type o-glycan bi   | CESC | 0.002706201  |
| UCK2 | Mapk_signaling_pathway     | CESC | 0.057174982  |
| UCK2 | Mapk3_erk1_activation      | CESC | -0.036113594 |
| UCK2 | Marginal zone b cell       | CESC | 0.017431315  |
| UCK2 | Memory b cell              | CESC | 0.04756578   |
| UCK2 | Mesenchymal cell           | CESC | 0.045450385  |

|      |                             |      |              |
|------|-----------------------------|------|--------------|
| UCK2 | Mesenchymal stem cell       | CESC | -0.081022671 |
| UCK2 | Metabolism of xenobiotic    | CESC | 0.035469033  |
| UCK2 | Migrating cancer stem cel   | CESC | 0.185245336  |
| UCK2 | Mitotic_spindle             | CESC | -0.100945593 |
| UCK2 | Monocyte                    | CESC | 0.090498945  |
| UCK2 | Mtor_signaling_pathway      | CESC | 0.062802052  |
| UCK2 | Mtorc1_signaling            | CESC | 0.439325735  |
| UCK2 | Mucin type o-glycan bios    | CESC | -0.275396902 |
| UCK2 | Myc_targets_v1              | CESC | 0.542615352  |
| UCK2 | Myeloid cell                | CESC | 0.043165182  |
| UCK2 | N-glycan biosynthesis       | CESC | -0.132764344 |
| UCK2 | Naive b cell                | CESC | -0.046091583 |
| UCK2 | Naive cd4+ t cell           | CESC | -0.064968692 |
| UCK2 | Naive cd8+ t cell           | CESC | -0.107853225 |
| UCK2 | Natural killer cell         | CESC | 0.058189546  |
| UCK2 | Natural killer t (nkt) cell | CESC | 0.177523404  |
| UCK2 | Natural regulatory t (treg) | CESC | -0.029883565 |
| UCK2 | Neomycin, kanamycin an      | CESC | 0.248193915  |
| UCK2 | Neutrophil                  | CESC | 0.135798203  |
| UCK2 | Nicotinate and nicotinami   | CESC | -0.13499038  |
| UCK2 | Nitrogen metabolism         | CESC | -0.012994293 |
| UCK2 | Nod_like_receptor_signal    | CESC | 0.209325711  |
| UCK2 | Notch_signaling             | CESC | 0.142035236  |
| UCK2 | One carbon pool by folate   | CESC | 0.146069656  |
| UCK2 | Other glycan degradation    | CESC | -0.316640519 |
| UCK2 | Other types of o-glycan b   | CESC | -0.170820499 |
| UCK2 | Oxidative phosphorylatio    | CESC | 0.27229149   |
| UCK2 | P53_pathway                 | CESC | 0.24003315   |
| UCK2 | P53_signaling_pathway       | CESC | 0.087041335  |
| UCK2 | Pantothenate and coa bios   | CESC | -0.041859283 |
| UCK2 | Pentose and glucuronate in  | CESC | 0.03286944   |
| UCK2 | Pentose phosphate pathwa    | CESC | 0.220503784  |
| UCK2 | Pericyte                    | CESC | -0.092503395 |
| UCK2 | Phenylalanine metabolism    | CESC | 0.217042778  |
| UCK2 | Phenylalanine, tyrosine ar  | CESC | 0.190564674  |
| UCK2 | Phosphonate and phosphiri   | CESC | 0.152293764  |
| UCK2 | Pi3k_akt_activation         | CESC | -0.04260048  |
| UCK2 | Pi3k_akt_mtor_signaling     | CESC | 0.242687567  |
| UCK2 | Porphyrin and chlorophyl    | CESC | 0.229467057  |
| UCK2 | Primary bile acid biosynt   | CESC | -0.046856754 |
| UCK2 | Propanoate metabolism       | CESC | -0.113208283 |
| UCK2 | Purine metabolism           | CESC | 0.40445095   |
| UCK2 | Pyrimidine metabolism       | CESC | 0.461721717  |

|       |                            |      |              |
|-------|----------------------------|------|--------------|
| UCK2  | Pyruvate metabolism        | CESC | 0.171348257  |
| UCK2  | Regulation_of_autophagy    | CESC | 0.033933584  |
| UCK2  | Retinol metabolism         | CESC | 0.034249209  |
| UCK2  | Riboflavin metabolism      | CESC | -0.003807367 |
| UCK2  | Schmahl_pdgf_signaling     | CESC | -0.055302087 |
| UCK2  | Selenocompound metabol     | CESC | -0.065934004 |
| UCK2  | Signaling_by_hippo         | CESC | -0.076595962 |
| UCK2  | Sphingolipid metabolism    | CESC | -0.286650602 |
| UCK2  | Starch and sucrose metabo  | CESC | 0.069382086  |
| UCK2  | Steroid biosynthesis       | CESC | 0.277628741  |
| UCK2  | Steroid hormone biosynth   | CESC | 0.145086477  |
| UCK2  | Sulfur metabolism          | CESC | -0.096805494 |
| UCK2  | Synthesis and degradation  | CESC | -0.025753415 |
| UCK2  | T helper cell              | CESC | -0.052588905 |
| UCK2  | T helper1 (th1) cell       | CESC | 0.08791805   |
| UCK2  | T helper17 (th17) cell     | CESC | 0.113660966  |
| UCK2  | T helper2 (th2) cell       | CESC | 0.053115451  |
| UCK2  | T helper9 (th9) cell       | CESC | 0.020804347  |
| UCK2  | Taurine and hypotaurine r  | CESC | -0.233123725 |
| UCK2  | Terpenoid backbone biosy   | CESC | 0.296357738  |
| UCK2  | Tgf_beta_signaling_pathw   | CESC | 0.033145194  |
| UCK2  | Thiamine metabolism        | CESC | -0.09273326  |
| UCK2  | Tnfa_signaling_via_nfk     | CESC | 0.160757782  |
| UCK2  | Tryptophan metabolism      | CESC | -0.025230955 |
| UCK2  | Tumor endothelial cell     | CESC | 0.244043403  |
| UCK2  | Tyrosine metabolism        | CESC | 0.063932774  |
| UCK2  | Ubiquinone and other ter   | CESC | 0.061281083  |
| UCK2  | Valine, leucine and isoleu | CESC | 0.071381335  |
| UCK2  | Valine, leucine and isoleu | CESC | -0.084896039 |
| UCK2  | Vascular endothelial cell  | CESC | -0.021441004 |
| UCK2  | Vascular smooth muscle c   | CESC | -0.057741312 |
| UCK2  | Vegf_signaling_pathway     | CESC | 0.121912941  |
| UCK2  | Vitamin b6 metabolism      | CESC | 0.086007462  |
| UCK2  | Willert_wnt_signaling      | CESC | 0.134580376  |
| UCK2  | Wnt_beta_catenin_signali   | CESC | 0.070547702  |
| UCKL1 | Abnormal plasma cell       | CESC | 0.015282528  |
| UCKL1 | Activated b cell           | CESC | 0.042433407  |
| UCKL1 | Activated cd4+ t cell      | CESC | -0.026128357 |
| UCKL1 | Activated t cell           | CESC | 0.020113808  |
| UCKL1 | Alanine, aspartate and glu | CESC | 0.110697906  |
| UCKL1 | Alcala_apoptosis           | CESC | 0.190169055  |
| UCKL1 | Alpha-linolenic acid meta  | CESC | -0.050979022 |
| UCKL1 | Amino sugar and nucleoti   | CESC | -0.029296319 |

|       |                                         |      |              |
|-------|-----------------------------------------|------|--------------|
| UCKL1 | Ampk_pathway                            | CESC | 0.150292409  |
| UCKL1 | Angiogenesis                            | CESC | -0.092409474 |
| UCKL1 | Arachidonic acid metabolism             | CESC | -0.145118928 |
| UCKL1 | Arginine and proline metabolism         | CESC | 0.094853174  |
| UCKL1 | Arginine biosynthesis                   | CESC | -0.041557813 |
| UCKL1 | Ascorbate and aldarate metabolism       | CESC | -0.108519915 |
| UCKL1 | Atypical memory b cell                  | CESC | 0.003396831  |
| UCKL1 | Axl+siglec6+ dendritic cell             | CESC | -0.163448562 |
| UCKL1 | B cell                                  | CESC | -0.015569522 |
| UCKL1 | B1 cell                                 | CESC | 0.051105652  |
| UCKL1 | Basal cell                              | CESC | -0.254047509 |
| UCKL1 | Beta-alanine metabolism                 | CESC | -0.081297131 |
| UCKL1 | Biosynthesis of unsaturated fatty acids | CESC | 0.059238908  |
| UCKL1 | Biotin metabolism                       | CESC | 0.083051681  |
| UCKL1 | Butanoate metabolism                    | CESC | 0.165118573  |
| UCKL1 | Caffeine metabolism                     | CESC | -0.223250771 |
| UCKL1 | Cancer stem cell                        | CESC | -0.222060211 |
| UCKL1 | Cancer stem-like cell                   | CESC | 0.067475386  |
| UCKL1 | Cd4+ cytotoxic t cell                   | CESC | -0.061172387 |
| UCKL1 | Cd4+ memory t cell                      | CESC | 0.0416823    |
| UCKL1 | Cd4+ regulatory t cell                  | CESC | -0.027805349 |
| UCKL1 | Cd4+ t helper cell                      | CESC | -0.004809784 |
| UCKL1 | Cd4+cd25+ regulatory t cell             | CESC | -0.007321795 |
| UCKL1 | Cd8+ cytotoxic t cell                   | CESC | 0.022599587  |
| UCKL1 | Cd8+ regulatory t cell                  | CESC | 0.008913241  |
| UCKL1 | Cell_cycle                              | CESC | -0.159991839 |
| UCKL1 | Chandran_metastasis_top5                | CESC | -0.024170395 |
| UCKL1 | Citrate cycle (tca cycle)               | CESC | 0.180774191  |
| UCKL1 | Cysteine and methionine metabolism      | CESC | 0.084173855  |
| UCKL1 | Cytokine induced killer cell            | CESC | 0.087172761  |
| UCKL1 | D-arginine and d-ornithine              | CESC | 0.176771477  |
| UCKL1 | D-glutamine and d-glutamate             | CESC | -0.187569802 |
| UCKL1 | Dendritic cell                          | CESC | -0.100648362 |
| UCKL1 | Dna_repair                              | CESC | 0.30183182   |
| UCKL1 | Dna_replication                         | CESC | 0.043571889  |
| UCKL1 | Double-negative memory t cell           | CESC | 0.17289305   |
| UCKL1 | Drug metabolism - cytochrome p450       | CESC | -0.171282121 |
| UCKL1 | Drug metabolism - other                 | CESC | 0.103466996  |
| UCKL1 | E2f_targets                             | CESC | -0.036979093 |
| UCKL1 | Ecm_receptor_interaction                | CESC | -0.10317726  |
| UCKL1 | Effector cd4+ memory t cell             | CESC | -0.09294179  |
| UCKL1 | Effector cd8+ memory t cell             | CESC | -0.122722043 |
| UCKL1 | Effector memory t cell                  | CESC | -0.040674315 |



|       |                              |      |              |
|-------|------------------------------|------|--------------|
| UCKL1 | Effector regulatory t (treg  | CESC | -0.056038852 |
| UCKL1 | Elvidge_hif1a_targets_up     | CESC | -0.136981898 |
| UCKL1 | Endothelial cell             | CESC | -0.119423329 |
| UCKL1 | Eosinophil                   | CESC | -0.076728728 |
| UCKL1 | Ether lipid metabolism       | CESC | -0.154004421 |
| UCKL1 | Exhausted cd4+ t cell        | CESC | -0.151108259 |
| UCKL1 | Exhausted cd8+ t cell        | CESC | -0.149516723 |
| UCKL1 | Exhausted t cell             | CESC | 0.046929731  |
| UCKL1 | Fat cell (adipocyte)         | CESC | 0.201347327  |
| UCKL1 | Fatty acid biosynthesis      | CESC | 0.138682484  |
| UCKL1 | Fatty acid degradation       | CESC | 0.053017053  |
| UCKL1 | Fatty acid elongation        | CESC | 0.138892948  |
| UCKL1 | Fibroblast                   | CESC | -0.143381582 |
| UCKL1 | Folate biosynthesis          | CESC | -0.017112493 |
| UCKL1 | Follicular b cell            | CESC | -0.06810426  |
| UCKL1 | Follicular dendritic cell    | CESC | -0.010517457 |
| UCKL1 | Follicular helper (tfh) t ce | CESC | -0.05511118  |
| UCKL1 | Follicular t cell            | CESC | 0.098558543  |
| UCKL1 | Foxp3+il-17+ t cell          | CESC | -0.014602299 |
| UCKL1 | Fructose and mannose me      | CESC | 0.15305966   |
| UCKL1 | G2m_checkpoint               | CESC | -0.177627018 |
| UCKL1 | Galactose metabolism         | CESC | -0.024861683 |
| UCKL1 | Galie_tumor_stemness_ge      | CESC | -0.22742658  |
| UCKL1 | Glutathione metabolism       | CESC | 0.059316046  |
| UCKL1 | Glycerolipid metabolism      | CESC | 0.067805535  |
| UCKL1 | Glycerophospholipid metæ     | CESC | 0.171455943  |
| UCKL1 | Glycine, serine and threor   | CESC | 0.170524944  |
| UCKL1 | Glycolysis / gluconeogene    | CESC | 0.039515101  |
| UCKL1 | Glycosaminoglycan biosy1     | CESC | 0.041250235  |
| UCKL1 | Glycosaminoglycan biosy1     | CESC | -0.095794234 |
| UCKL1 | Glycosaminoglycan biosy1     | CESC | -0.058102428 |
| UCKL1 | Glycosaminoglycan degra      | CESC | -0.001846627 |
| UCKL1 | Glycosphingolipid biosyn1    | CESC | 0.062095467  |
| UCKL1 | Glycosphingolipid biosyn1    | CESC | -0.047300292 |
| UCKL1 | Glycosphingolipid biosyn1    | CESC | -0.146146628 |
| UCKL1 | Glycosylphosphatidylinos:    | CESC | 0.083711151  |
| UCKL1 | Glyoxylate and dicarboxy     | CESC | 0.297421084  |
| UCKL1 | Granulocyte                  | CESC | -0.029693982 |
| UCKL1 | Hedgehog_signaling           | CESC | -0.182258338 |
| UCKL1 | Histidine metabolism         | CESC | -0.117423884 |
| UCKL1 | Hypoxia                      | CESC | -0.138837051 |
| UCKL1 | Il-17ralpha t cell           | CESC | 0.020272847  |
| UCKL1 | Il2_stat5_signaling          | CESC | -0.202368943 |

|       |                             |      |              |
|-------|-----------------------------|------|--------------|
| UCKL1 | Il6_jak_stat3_signaling     | CESC | -0.24272941  |
| UCKL1 | Immune_checkpoints_tun      | CESC | -0.093349543 |
| UCKL1 | Immune_inhibition_cytok     | CESC | -0.057240211 |
| UCKL1 | Inositol phosphate metabo   | CESC | -0.305739037 |
| UCKL1 | Interleukin_6_signaling     | CESC | -0.406460647 |
| UCKL1 | Jaeger_metastasis_up        | CESC | 0.101084746  |
| UCKL1 | Jain_nfkb_signaling         | CESC | 0.012346788  |
| UCKL1 | Kras_signaling_up           | CESC | -0.261539904 |
| UCKL1 | Linoleic acid metabolism    | CESC | -0.17495912  |
| UCKL1 | Lipoic acid metabolism      | CESC | 0.133641739  |
| UCKL1 | Lysine degradation          | CESC | 0.047195878  |
| UCKL1 | Lysosome                    | CESC | -0.029628848 |
| UCKL1 | M1 macrophage               | CESC | -0.141349031 |
| UCKL1 | M2 macrophage               | CESC | -0.086935036 |
| UCKL1 | Mannose type o-glycan bi    | CESC | 0.21995622   |
| UCKL1 | Mapk_signaling_pathway      | CESC | -0.354867258 |
| UCKL1 | Mapk3_erk1_activation       | CESC | -0.371207075 |
| UCKL1 | Marginal zone b cell        | CESC | -0.0998117   |
| UCKL1 | Memory b cell               | CESC | -0.009728071 |
| UCKL1 | Mesenchymal cell            | CESC | 0.005961161  |
| UCKL1 | Mesenchymal stem cell       | CESC | -0.121179747 |
| UCKL1 | Metabolism of xenobiotic    | CESC | -0.095812578 |
| UCKL1 | Migrating cancer stem cel   | CESC | -0.191236387 |
| UCKL1 | Mitotic_spindle             | CESC | -0.291517097 |
| UCKL1 | Monocyte                    | CESC | -0.146733068 |
| UCKL1 | Mtor_signaling_pathway      | CESC | -0.126849115 |
| UCKL1 | Mtorc1_signaling            | CESC | -0.108494485 |
| UCKL1 | Mucin type o-glycan biosy   | CESC | -0.301369907 |
| UCKL1 | Myc_targets_v1              | CESC | 0.198031171  |
| UCKL1 | Myeloid cell                | CESC | -0.066196823 |
| UCKL1 | N-glycan biosynthesis       | CESC | 0.010084922  |
| UCKL1 | Naive b cell                | CESC | 0.077970036  |
| UCKL1 | Naive cd4+ t cell           | CESC | -0.149739689 |
| UCKL1 | Naive cd8+ t cell           | CESC | -0.042273714 |
| UCKL1 | Natural killer cell         | CESC | -0.023744021 |
| UCKL1 | Natural killer t (nkt) cell | CESC | 0.081195397  |
| UCKL1 | Natural regulatory t (treg) | CESC | -0.125359604 |
| UCKL1 | Neomycin, kanamycin and     | CESC | -0.194509032 |
| UCKL1 | Neutrophil                  | CESC | -0.202543539 |
| UCKL1 | Nicotinate and nicotinami   | CESC | -0.045207426 |
| UCKL1 | Nitrogen metabolism         | CESC | -0.110713449 |
| UCKL1 | Nod_like_receptor_signal    | CESC | -0.221479217 |
| UCKL1 | Notch_signaling             | CESC | -0.055253301 |

|       |                            |      |              |
|-------|----------------------------|------|--------------|
| UCKL1 | One carbon pool by folate  | CESC | 0.091973911  |
| UCKL1 | Other glycan degradation   | CESC | 0.121593386  |
| UCKL1 | Other types of o-glycan b  | CESC | 0.389886902  |
| UCKL1 | Oxidative phosphorylatior  | CESC | 0.316350019  |
| UCKL1 | P53_pathway                | CESC | -0.23941412  |
| UCKL1 | P53_signaling_pathway      | CESC | -0.406324108 |
| UCKL1 | Pantothenate and coa bios  | CESC | -0.005257495 |
| UCKL1 | Pentose and glucuronate in | CESC | -0.0140805   |
| UCKL1 | Pentose phosphate pathwa   | CESC | 0.146718398  |
| UCKL1 | Pericyte                   | CESC | -0.046121052 |
| UCKL1 | Phenylalanine metabolism   | CESC | 0.00843283   |
| UCKL1 | Phenylalanine, tyrosine ar | CESC | 0.16737891   |
| UCKL1 | Phosphonate and phosphir   | CESC | -0.04028404  |
| UCKL1 | Pi3k_akt_activation        | CESC | -0.185806252 |
| UCKL1 | Pi3k_akt_mtor_signaling    | CESC | -0.27899887  |
| UCKL1 | Porphyrin and chlorophyl   | CESC | 0.037373962  |
| UCKL1 | Primary bile acid biosynt  | CESC | 0.13356567   |
| UCKL1 | Propanoate metabolism      | CESC | 0.034195106  |
| UCKL1 | Purine metabolism          | CESC | 0.281537499  |
| UCKL1 | Pyrimidine metabolism      | CESC | 0.30547759   |
| UCKL1 | Pyruvate metabolism        | CESC | 0.253251133  |
| UCKL1 | Regulation_of_autophagy    | CESC | -0.024635198 |
| UCKL1 | Retinol metabolism         | CESC | -0.194473888 |
| UCKL1 | Riboflavin metabolism      | CESC | 0.137123883  |
| UCKL1 | Schmahl_pdgf_signaling     | CESC | -0.49961741  |
| UCKL1 | Selenocompound metabol     | CESC | 0.077781692  |
| UCKL1 | Signaling_by_hippo         | CESC | -0.223929542 |
| UCKL1 | Sphingolipid metabolism    | CESC | -0.165635952 |
| UCKL1 | Starch and sucrose metabo  | CESC | -0.132671248 |
| UCKL1 | Steroid biosynthesis       | CESC | -0.194990714 |
| UCKL1 | Steroid hormone biosynth   | CESC | -0.178668534 |
| UCKL1 | Sulfur metabolism          | CESC | -0.151765379 |
| UCKL1 | Synthesis and degradation  | CESC | 0.223014773  |
| UCKL1 | T helper cell              | CESC | -0.039104783 |
| UCKL1 | T helper1 (th1) cell       | CESC | -0.034163287 |
| UCKL1 | T helper17 (th17) cell     | CESC | -0.106251232 |
| UCKL1 | T helper2 (th2) cell       | CESC | -0.034265034 |
| UCKL1 | T helper9 (th9) cell       | CESC | 0.01628458   |
| UCKL1 | Taurine and hypotaurine r  | CESC | 0.21408476   |
| UCKL1 | Terpenoid backbone biosy   | CESC | 0.076786543  |
| UCKL1 | Tgf_beta_signaling_pathw   | CESC | -0.225764383 |
| UCKL1 | Thiamine metabolism        | CESC | 0.241207115  |
| UCKL1 | Tnfa_signaling_via_nfbk    | CESC | -0.287716086 |

|       |                            |      |              |
|-------|----------------------------|------|--------------|
| UCKL1 | Tryptophan metabolism      | CESC | 0.147022154  |
| UCKL1 | Tumor endothelial cell     | CESC | -0.12019024  |
| UCKL1 | Tyrosine metabolism        | CESC | 0.010486398  |
| UCKL1 | Ubiquinone and other ter   | CESC | 0.211057069  |
| UCKL1 | Valine, leucine and isoleu | CESC | 0.154996741  |
| UCKL1 | Valine, leucine and isoleu | CESC | 0.142916483  |
| UCKL1 | Vascular endothelial cell  | CESC | 0.012058615  |
| UCKL1 | Vascular smooth muscle c   | CESC | -0.011958289 |
| UCKL1 | Vegf_signaling_pathway     | CESC | -0.149492108 |
| UCKL1 | Vitamin b6 metabolism      | CESC | 0.277972297  |
| UCKL1 | Willert_wnt_signaling      | CESC | 0.172475632  |
| UCKL1 | Wnt_beta_catenin_signali   | CESC | -0.076960448 |
| UPP1  | Abnormal plasma cell       | CESC | 0.100693559  |
| UPP1  | Activated b cell           | CESC | 0.205978534  |
| UPP1  | Activated cd4+ t cell      | CESC | 0.189515531  |
| UPP1  | Activated t cell           | CESC | 0.180195353  |
| UPP1  | Alanine, aspartate and glu | CESC | -0.055863571 |
| UPP1  | Alcala_apoptosis           | CESC | 0.29408241   |
| UPP1  | Alpha-linolenic acid meta  | CESC | 0.09748541   |
| UPP1  | Amino sugar and nucleoti   | CESC | 0.338386997  |
| UPP1  | Ampk_pathway               | CESC | -0.287782201 |
| UPP1  | Angiogenesis               | CESC | 0.368568165  |
| UPP1  | Arachidonic acid metabol   | CESC | 0.307337359  |
| UPP1  | Arginine and proline meta  | CESC | 0.057848613  |
| UPP1  | Arginine biosynthesis      | CESC | 0.104864455  |
| UPP1  | Ascorbate and aldarate mε  | CESC | -0.033927824 |
| UPP1  | Atypical memory b cell     | CESC | 0.174542387  |
| UPP1  | Axl+siglec6+ dendritic ce  | CESC | 0.197872947  |
| UPP1  | B cell                     | CESC | -0.022415494 |
| UPP1  | B1 cell                    | CESC | 0.034975871  |
| UPP1  | Basal cell                 | CESC | 0.529956778  |
| UPP1  | Beta-alanine metabolism    | CESC | 0.061855518  |
| UPP1  | Biosynthesis of unsaturate | CESC | -0.048526161 |
| UPP1  | Biotin metabolism          | CESC | -0.186784895 |
| UPP1  | Butanoate metabolism       | CESC | -0.090106897 |
| UPP1  | Caffeine metabolism        | CESC | 0.018907911  |
| UPP1  | Cancer stem cell           | CESC | 0.24643988   |
| UPP1  | Cancer stem-like cell      | CESC | -0.336993771 |
| UPP1  | Cd4+ cytotoxic t cell      | CESC | 0.270169201  |
| UPP1  | Cd4+ memory t cell         | CESC | 0.175862989  |
| UPP1  | Cd4+ regulatory t cell     | CESC | 0.207218387  |
| UPP1  | Cd4+ t helper cell         | CESC | 0.165030228  |
| UPP1  | Cd4+cd25+ regulatory t c   | CESC | 0.180248171  |

|      |                              |      |              |
|------|------------------------------|------|--------------|
| UPP1 | Cd8+ cytotoxic t cell        | CESC | 0.240691185  |
| UPP1 | Cd8+ regulatory t cell       | CESC | 0.145352339  |
| UPP1 | Cell_cycle                   | CESC | -0.004911148 |
| UPP1 | Chandran_metastasis_top5     | CESC | -0.11163064  |
| UPP1 | Citrate cycle (tca cycle)    | CESC | 0.018981545  |
| UPP1 | Cysteine and methionine r    | CESC | 0.010875565  |
| UPP1 | Cytokine induced killer c    | CESC | 0.149781889  |
| UPP1 | D-arginine and d-ornithin    | CESC | 0.024062602  |
| UPP1 | D-glutamine and d-glutan     | CESC | 0.090795465  |
| UPP1 | Dendritic cell               | CESC | 0.363261953  |
| UPP1 | Dna_repair                   | CESC | 0.132803839  |
| UPP1 | Dna_replication              | CESC | 0.032170165  |
| UPP1 | Double-negative memory       | CESC | 0.142973837  |
| UPP1 | Drug metabolism - cytoch     | CESC | 0.014098517  |
| UPP1 | Drug metabolism - other c    | CESC | 0.347870978  |
| UPP1 | E2f_targets                  | CESC | -0.121337382 |
| UPP1 | Ecm_receptor_interaction     | CESC | 0.233705627  |
| UPP1 | Effector cd4+ memory t (     | CESC | 0.088632576  |
| UPP1 | Effector cd8+ memory t (     | CESC | 0.368036551  |
| UPP1 | Effector memory t cell       | CESC | 0.151957693  |
| UPP1 | Effector regulatory t (treg  | CESC | 0.165295335  |
| UPP1 | Elvidge_hif1a_targets_up     | CESC | 0.047833356  |
| UPP1 | Endothelial cell             | CESC | 0.089891116  |
| UPP1 | Eosinophil                   | CESC | 0.280888775  |
| UPP1 | Ether lipid metabolism       | CESC | 0.109483994  |
| UPP1 | Exhausted cd4+ t cell        | CESC | 0.283343287  |
| UPP1 | Exhausted cd8+ t cell        | CESC | 0.250437953  |
| UPP1 | Exhausted t cell             | CESC | 0.19581335   |
| UPP1 | Fat cell (adipocyte)         | CESC | 0.066781235  |
| UPP1 | Fatty acid biosynthesis      | CESC | -0.147723733 |
| UPP1 | Fatty acid degradation       | CESC | -0.22188184  |
| UPP1 | Fatty acid elongation        | CESC | 0.089851355  |
| UPP1 | Fibroblast                   | CESC | 0.21151717   |
| UPP1 | Folate biosynthesis          | CESC | 0.232235164  |
| UPP1 | Follicular b cell            | CESC | 0.212685435  |
| UPP1 | Follicular dendritic cell    | CESC | 0.068458652  |
| UPP1 | Follicular helper (tfh) t ce | CESC | 0.296560641  |
| UPP1 | Follicular t cell            | CESC | 0.155596592  |
| UPP1 | Foxp3+il-17+ t cell          | CESC | 0.095758893  |
| UPP1 | Fructose and mannose me      | CESC | 0.373683485  |
| UPP1 | G2m_checkpoint               | CESC | -0.120794808 |
| UPP1 | Galactose metabolism         | CESC | 0.504255989  |
| UPP1 | Galie_tumor_stemness_ge      | CESC | 0.104902922  |

|      |                                           |      |              |
|------|-------------------------------------------|------|--------------|
| UPP1 | Glutathione metabolism                    | CESC | 0.069531707  |
| UPP1 | Glycerolipid metabolism                   | CESC | 0.003946802  |
| UPP1 | Glycerophospholipid metabolism            | CESC | 0.117418288  |
| UPP1 | Glycine, serine and threonine metabolism  | CESC | 0.133790223  |
| UPP1 | Glycolysis / gluconeogenesis              | CESC | 0.271967935  |
| UPP1 | Glycosaminoglycan biosynthesis            | CESC | 0.331827903  |
| UPP1 | Glycosaminoglycan biosynthesis            | CESC | 0.068204089  |
| UPP1 | Glycosaminoglycan biosynthesis            | CESC | -0.054027334 |
| UPP1 | Glycosaminoglycan degradation             | CESC | 0.031498981  |
| UPP1 | Glycosphingolipid biosynthesis            | CESC | 0.049858709  |
| UPP1 | Glycosphingolipid biosynthesis            | CESC | 0.128078436  |
| UPP1 | Glycosphingolipid biosynthesis            | CESC | -0.028542773 |
| UPP1 | Glycosylphosphatidylinositol biosynthesis | CESC | -0.123608955 |
| UPP1 | Glyoxylate and dicarboxylate metabolism   | CESC | -0.140073396 |
| UPP1 | Granulocyte                               | CESC | 0.192652234  |
| UPP1 | Hedgehog signaling                        | CESC | -0.044282798 |
| UPP1 | Histidine metabolism                      | CESC | -0.025705369 |
| UPP1 | Hypoxia                                   | CESC | 0.53584748   |
| UPP1 | IL-17Ralpha T cell                        | CESC | 0.204669244  |
| UPP1 | IL2_stat5_signaling                       | CESC | 0.517000234  |
| UPP1 | IL6_jak_stat3_signaling                   | CESC | 0.436275362  |
| UPP1 | Immune checkpoints                        | CESC | 0.321423064  |
| UPP1 | Immune inhibition cytokines               | CESC | 0.435369968  |
| UPP1 | Inositol phosphate metabolism             | CESC | -0.113312432 |
| UPP1 | Interleukin_6_signaling                   | CESC | 0.149686883  |
| UPP1 | Jaeger metastasis up                      | CESC | -0.028569757 |
| UPP1 | Jain_nfkB_signaling                       | CESC | 0.197434607  |
| UPP1 | Kras_signaling_up                         | CESC | 0.383733365  |
| UPP1 | Linoleic acid metabolism                  | CESC | 0.02825967   |
| UPP1 | Lipoic acid metabolism                    | CESC | -0.135976229 |
| UPP1 | Lysine degradation                        | CESC | -0.36649394  |
| UPP1 | Lysosome                                  | CESC | 0.217462875  |
| UPP1 | M1 macrophage                             | CESC | 0.363681734  |
| UPP1 | M2 macrophage                             | CESC | 0.440132449  |
| UPP1 | Mannose type O-glycan biosynthesis        | CESC | -0.114785679 |
| UPP1 | Mapk_signaling_pathway                    | CESC | 0.357255794  |
| UPP1 | Mapk3_erk1_activation                     | CESC | 0.11727664   |
| UPP1 | Marginal zone B cell                      | CESC | 0.075865813  |
| UPP1 | Memory B cell                             | CESC | 0.18057307   |
| UPP1 | Mesenchymal cell                          | CESC | 0.249378241  |
| UPP1 | Mesenchymal stem cell                     | CESC | 0.189142994  |
| UPP1 | Metabolism of xenobiotics                 | CESC | 0.047578909  |
| UPP1 | Migrating cancer stem cell                | CESC | 0.315374524  |

|      |                             |      |              |
|------|-----------------------------|------|--------------|
| UPP1 | Mitotic_spindle             | CESC | -0.092019264 |
| UPP1 | Monocyte                    | CESC | 0.457373897  |
| UPP1 | Mtor_signaling_pathway      | CESC | 0.048217332  |
| UPP1 | Mtorc1_signaling            | CESC | 0.382845577  |
| UPP1 | Mucin type o-glycan biosy   | CESC | -0.086243591 |
| UPP1 | Myc_targets_v1              | CESC | 0.263132292  |
| UPP1 | Myeloid cell                | CESC | 0.249465771  |
| UPP1 | N-glycan biosynthesis       | CESC | -0.215691081 |
| UPP1 | Naive b cell                | CESC | 0.165257923  |
| UPP1 | Naive cd4+ t cell           | CESC | 0.074088555  |
| UPP1 | Naive cd8+ t cell           | CESC | -0.038353048 |
| UPP1 | Natural killer cell         | CESC | 0.239201347  |
| UPP1 | Natural killer t (nkt) cell | CESC | 0.129512021  |
| UPP1 | Natural regulatory t (treg) | CESC | 0.225334719  |
| UPP1 | Neomycin, kanamycin and     | CESC | 0.421300589  |
| UPP1 | Neutrophil                  | CESC | 0.516072244  |
| UPP1 | Nicotinate and nicotinami   | CESC | 0.003931329  |
| UPP1 | Nitrogen metabolism         | CESC | 0.021499236  |
| UPP1 | Nod_like_receptor_signal    | CESC | 0.47632475   |
| UPP1 | Notch_signaling             | CESC | 0.145806922  |
| UPP1 | One carbon pool by folate   | CESC | -0.153798927 |
| UPP1 | Other glycan degradation    | CESC | -0.127254895 |
| UPP1 | Other types of o-glycan b   | CESC | -0.199990321 |
| UPP1 | Oxidative phosphorylatio    | CESC | 0.194190604  |
| UPP1 | P53_pathway                 | CESC | 0.579244742  |
| UPP1 | P53_signaling_pathway       | CESC | 0.203111626  |
| UPP1 | Pantothenate and coa bios   | CESC | 0.064702938  |
| UPP1 | Pentose and glucuronate in  | CESC | 0.031597294  |
| UPP1 | Pentose phosphate pathwa    | CESC | 0.328053995  |
| UPP1 | Pericyte                    | CESC | 0.162992918  |
| UPP1 | Phenylalanine metabolism    | CESC | 0.314993503  |
| UPP1 | Phenylalanine, tyrosine ar  | CESC | 0.14022887   |
| UPP1 | Phosphonate and phosphir    | CESC | -0.061590056 |
| UPP1 | Pi3k_akt_activation         | CESC | 0.051672946  |
| UPP1 | Pi3k_akt_mtor_signaling     | CESC | 0.391836745  |
| UPP1 | Porphyrin and chlorophyl    | CESC | 0.163522403  |
| UPP1 | Primary bile acid biosynt   | CESC | -0.063274423 |
| UPP1 | Propanoate metabolism       | CESC | -0.275277746 |
| UPP1 | Purine metabolism           | CESC | 0.080466422  |
| UPP1 | Pyrimidine metabolism       | CESC | 0.217303523  |
| UPP1 | Pyruvate metabolism         | CESC | -0.072945028 |
| UPP1 | Regulation_of_autophagy     | CESC | 0.067308354  |
| UPP1 | Retinol metabolism          | CESC | 0.144692382  |

|      |                            |      |              |
|------|----------------------------|------|--------------|
| UPP1 | Riboflavin metabolism      | CESC | -0.038977733 |
| UPP1 | Schmahl_pdgf_signaling     | CESC | 0.109869038  |
| UPP1 | Selenocompound metabol     | CESC | -0.445026015 |
| UPP1 | Signaling_by_hippo         | CESC | -0.068040004 |
| UPP1 | Sphingolipid metabolism    | CESC | -0.100721674 |
| UPP1 | Starch and sucrose metabo  | CESC | 0.25870111   |
| UPP1 | Steroid biosynthesis       | CESC | 0.229057064  |
| UPP1 | Steroid hormone biosynth   | CESC | 0.251637164  |
| UPP1 | Sulfur metabolism          | CESC | -0.098240244 |
| UPP1 | Synthesis and degradation  | CESC | -0.019327013 |
| UPP1 | T helper cell              | CESC | 0.176692361  |
| UPP1 | T helper1 (th1) cell       | CESC | 0.330833755  |
| UPP1 | T helper17 (th17) cell     | CESC | 0.419653731  |
| UPP1 | T helper2 (th2) cell       | CESC | 0.277257621  |
| UPP1 | T helper9 (th9) cell       | CESC | 0.220422621  |
| UPP1 | Taurine and hypotaurine r  | CESC | -0.260661256 |
| UPP1 | Terpenoid backbone biosy   | CESC | 0.066639373  |
| UPP1 | Tgf_beta_signaling_pathw   | CESC | 0.024875801  |
| UPP1 | Thiamine metabolism        | CESC | -0.051688604 |
| UPP1 | Tnfa_signaling_via_nfkb    | CESC | 0.554491532  |
| UPP1 | Tryptophan metabolism      | CESC | 0.041200461  |
| UPP1 | Tumor endothelial cell     | CESC | 0.377683809  |
| UPP1 | Tyrosine metabolism        | CESC | 0.146330894  |
| UPP1 | Ubiquinone and other terf  | CESC | -0.072111595 |
| UPP1 | Valine, leucine and isoleu | CESC | 0.28246224   |
| UPP1 | Valine, leucine and isoleu | CESC | -0.257693444 |
| UPP1 | Vascular endothelial cell  | CESC | 0.145312648  |
| UPP1 | Vascular smooth muscle c   | CESC | -0.046846622 |
| UPP1 | Vegf_signaling_pathway     | CESC | 0.332280853  |
| UPP1 | Vitamin b6 metabolism      | CESC | 0.038847865  |
| UPP1 | Willert_wnt_signaling      | CESC | 0.159137723  |
| UPP1 | Wnt_beta_catenin_signali   | CESC | 0.034227885  |
| UPP2 | Abnormal plasma cell       | CESC | 0.002391993  |
| UPP2 | Activated b cell           | CESC | -0.096135609 |
| UPP2 | Activated cd4+ t cell      | CESC | -0.105370322 |
| UPP2 | Activated t cell           | CESC | -0.078710154 |
| UPP2 | Alanine, aspartate and glu | CESC | 0.036494517  |
| UPP2 | Alcala_apoptosis           | CESC | -0.217632542 |
| UPP2 | Alpha-linolenic acid meta  | CESC | -0.00931511  |
| UPP2 | Amino sugar and nucleoti   | CESC | -0.107411211 |
| UPP2 | Ampk_pathway               | CESC | -0.029254834 |
| UPP2 | Angiogenesis               | CESC | -0.096707286 |
| UPP2 | Arachidonic acid metaboli  | CESC | -0.027144011 |



|      |                             |     |              |
|------|-----------------------------|-----|--------------|
| UPP2 | Arginine and proline meta   | CEC | -0.034351651 |
| UPP2 | Arginine biosynthesis       | CEC | -0.082574428 |
| UPP2 | Ascorbate and aldarate me   | CEC | 0.002155793  |
| UPP2 | Atypical memory b cell      | CEC | -0.08073238  |
| UPP2 | Axl+siglec6+ dendritic ce   | CEC | 0.042823696  |
| UPP2 | B cell                      | CEC | 0.094712054  |
| UPP2 | B1 cell                     | CEC | -0.06167426  |
| UPP2 | Basal cell                  | CEC | -0.288881781 |
| UPP2 | Beta-alanine metabolism     | CEC | -0.05121465  |
| UPP2 | Biosynthesis of unsaturate  | CEC | -0.017121421 |
| UPP2 | Biotin metabolism           | CEC | -0.049864286 |
| UPP2 | Butanoate metabolism        | CEC | 0.070811118  |
| UPP2 | Caffeine metabolism         | CEC | 0.038020513  |
| UPP2 | Cancer stem cell            | CEC | -0.070976328 |
| UPP2 | Cancer stem-like cell       | CEC | 0.292067655  |
| UPP2 | Cd4+ cytotoxic t cell       | CEC | -0.051337628 |
| UPP2 | Cd4+ memory t cell          | CEC | -0.11228707  |
| UPP2 | Cd4+ regulatory t cell      | CEC | -0.12289498  |
| UPP2 | Cd4+ t helper cell          | CEC | -0.089096933 |
| UPP2 | Cd4+cd25+ regulatory t c    | CEC | -0.096758834 |
| UPP2 | Cd8+ cytotoxic t cell       | CEC | -0.104555398 |
| UPP2 | Cd8+ regulatory t cell      | CEC | -0.075646326 |
| UPP2 | Cell_cycle                  | CEC | -0.214537558 |
| UPP2 | Chandran_metastasis_top     | CEC | -0.167025625 |
| UPP2 | Citrate cycle (tca cycle)   | CEC | -0.107365557 |
| UPP2 | Cysteine and methionine r   | CEC | 0.034026064  |
| UPP2 | Cytokine induced killer c   | CEC | -0.039212637 |
| UPP2 | D-arginine and d-ornithin   | CEC | -0.01502942  |
| UPP2 | D-glutamine and d-glutan    | CEC | -0.095861155 |
| UPP2 | Dendritic cell              | CEC | -0.116616332 |
| UPP2 | Dna_repair                  | CEC | -0.136438278 |
| UPP2 | Dna_replication             | CEC | -0.119977262 |
| UPP2 | Double-negative memory      | CEC | -0.033664362 |
| UPP2 | Drug metabolism - cytoch    | CEC | 0.063662561  |
| UPP2 | Drug metabolism - other     | CEC | -0.094000498 |
| UPP2 | E2f_targets                 | CEC | -0.148022023 |
| UPP2 | Ecm_receptor_interaction    | CEC | -0.047947328 |
| UPP2 | Effector cd4+ memory t (    | CEC | -0.104291613 |
| UPP2 | Effector cd8+ memory t (    | CEC | -0.126897155 |
| UPP2 | Effector memory t cell      | CEC | -0.108080925 |
| UPP2 | Effector regulatory t (treg | CEC | -0.085162386 |
| UPP2 | Elvidge_hif1a_targets_up    | CEC | -0.214007195 |
| UPP2 | Endothelial cell            | CEC | 0.047929463  |

|      |                              |      |              |
|------|------------------------------|------|--------------|
| UPP2 | Eosinophil                   | CESC | -0.089194786 |
| UPP2 | Ether lipid metabolism       | CESC | -0.023486422 |
| UPP2 | Exhausted cd4+ t cell        | CESC | -0.077907339 |
| UPP2 | Exhausted cd8+ t cell        | CESC | -0.076633607 |
| UPP2 | Exhausted t cell             | CESC | -0.099204366 |
| UPP2 | Fat cell (adipocyte)         | CESC | -0.033750912 |
| UPP2 | Fatty acid biosynthesis      | CESC | 0.046676821  |
| UPP2 | Fatty acid degradation       | CESC | 0.110625231  |
| UPP2 | Fatty acid elongation        | CESC | -0.099858355 |
| UPP2 | Fibroblast                   | CESC | -0.022736772 |
| UPP2 | Folate biosynthesis          | CESC | -0.059951716 |
| UPP2 | Follicular b cell            | CESC | -0.104270933 |
| UPP2 | Follicular dendritic cell    | CESC | 0.054894151  |
| UPP2 | Follicular helper (tfh) t ce | CESC | -0.153547337 |
| UPP2 | Follicular t cell            | CESC | -0.084420632 |
| UPP2 | Foxp3+il-17+ t cell          | CESC | -0.138482176 |
| UPP2 | Fructose and mannose me      | CESC | -0.156549812 |
| UPP2 | G2m_checkpoint               | CESC | -0.213856449 |
| UPP2 | Galactose metabolism         | CESC | -0.17095964  |
| UPP2 | Galie_tumor_stemness_ge      | CESC | 0.05729969   |
| UPP2 | Glutathione metabolism       | CESC | 0.068238994  |
| UPP2 | Glycerolipid metabolism      | CESC | 0.149684517  |
| UPP2 | Glycerophospholipid met&     | CESC | 0.009819879  |
| UPP2 | Glycine, serine and threor   | CESC | 0.082253652  |
| UPP2 | Glycolysis / gluconeogene    | CESC | -0.183263905 |
| UPP2 | Glycosaminoglycan biosy      | CESC | -0.0320099   |
| UPP2 | Glycosaminoglycan biosy      | CESC | 0.016240473  |
| UPP2 | Glycosaminoglycan biosy      | CESC | 0.067163075  |
| UPP2 | Glycosaminoglycan degra      | CESC | 0.052191444  |
| UPP2 | Glycosphingolipid biosyn     | CESC | 0.16217626   |
| UPP2 | Glycosphingolipid biosyn     | CESC | 0.047091476  |
| UPP2 | Glycosphingolipid biosyn     | CESC | -0.011508778 |
| UPP2 | Glycosylphosphatidylinos     | CESC | -0.068350043 |
| UPP2 | Glyoxylate and dicarboxy     | CESC | -0.00390904  |
| UPP2 | Granulocyte                  | CESC | -0.055831441 |
| UPP2 | Hedgehog_signaling           | CESC | 0.040092714  |
| UPP2 | Histidine metabolism         | CESC | -0.00235867  |
| UPP2 | Hypoxia                      | CESC | -0.257136204 |
| UPP2 | Il-17alpha t cell            | CESC | -0.102051103 |
| UPP2 | Il2_stat5_signaling          | CESC | -0.174854784 |
| UPP2 | Il6_jak_stat3_signaling      | CESC | -0.232932653 |
| UPP2 | Immune_checkpoints_tun       | CESC | -0.07980233  |
| UPP2 | Immune_inhibition_cytok      | CESC | -0.165227517 |

|      |                             |      |              |
|------|-----------------------------|------|--------------|
| UPP2 | Inositol phosphate metabo   | CESC | -0.048917019 |
| UPP2 | Interleukin_6_signaling     | CESC | -0.17254081  |
| UPP2 | Jaeger_metastasis_up        | CESC | 0.054619861  |
| UPP2 | Jain_nfkb_signaling         | CESC | -0.34084728  |
| UPP2 | Kras_signaling_up           | CESC | -0.075086681 |
| UPP2 | Linoleic acid metabolism    | CESC | 0.077502289  |
| UPP2 | Lipoic acid metabolism      | CESC | 0.101626143  |
| UPP2 | Lysine degradatation        | CESC | 0.028656868  |
| UPP2 | Lysosome                    | CESC | -0.003293489 |
| UPP2 | M1 macrophage               | CESC | -0.158168178 |
| UPP2 | M2 macrophage               | CESC | -0.152448763 |
| UPP2 | Mannose type o-glycan bi    | CESC | 0.018128003  |
| UPP2 | Mapk_signaling_pathway      | CESC | -0.192572701 |
| UPP2 | Mapk3_erk1_activation       | CESC | -0.191446045 |
| UPP2 | Marginal zone b cell        | CESC | -0.087638659 |
| UPP2 | Memory b cell               | CESC | -0.078708179 |
| UPP2 | Mesenchymal cell            | CESC | 0.028224754  |
| UPP2 | Mesenchymal stem cell       | CESC | 0.023684633  |
| UPP2 | Metabolism of xenobiotic    | CESC | 0.069778986  |
| UPP2 | Migrating cancer stem cel   | CESC | -0.207910712 |
| UPP2 | Mitotic_spindle             | CESC | -0.178632858 |
| UPP2 | Monocyte                    | CESC | -0.134560971 |
| UPP2 | Mtor_signaling_pathway      | CESC | -0.151092897 |
| UPP2 | Mtorc1_signaling            | CESC | -0.301518604 |
| UPP2 | Mucin type o-glycan biosy   | CESC | 0.040734829  |
| UPP2 | Myc_targets_v1              | CESC | -0.244987646 |
| UPP2 | Myeloid cell                | CESC | -0.09057316  |
| UPP2 | N-glycan biosynthesis       | CESC | 0.021437966  |
| UPP2 | Naive b cell                | CESC | -0.003322607 |
| UPP2 | Naive cd4+ t cell           | CESC | -0.016722022 |
| UPP2 | Naive cd8+ t cell           | CESC | -0.008161521 |
| UPP2 | Natural killer cell         | CESC | -0.10598982  |
| UPP2 | Natural killer t (nkt) cell | CESC | -0.118782066 |
| UPP2 | Natural regulatory t (treg) | CESC | -0.12867442  |
| UPP2 | Neomycin, kanamycin an      | CESC | -0.157221228 |
| UPP2 | Neutrophil                  | CESC | -0.204673658 |
| UPP2 | Nicotinate and nicotinami   | CESC | 0.03651475   |
| UPP2 | Nitrogen metabolism         | CESC | 0.014115973  |
| UPP2 | Nod_like_receptor_signal    | CESC | -0.294068424 |
| UPP2 | Notch_signaling             | CESC | -0.082824847 |
| UPP2 | One carbon pool by folate   | CESC | -0.082929736 |
| UPP2 | Other glycan degradatation  | CESC | 0.147592229  |
| UPP2 | Other types of o-glycan b   | CESC | 0.1605979    |

|      |                                                   |      |              |
|------|---------------------------------------------------|------|--------------|
| UPP2 | Oxidative phosphorylation                         | CESC | 0.001361755  |
| UPP2 | P53_pathway                                       | CESC | -0.295679512 |
| UPP2 | P53_signaling_pathway                             | CESC | -0.166371777 |
| UPP2 | Pantothenate and coa biosynthesis                 | CESC | 0.04708662   |
| UPP2 | Pentose and glucuronate interconversions          | CESC | 0.001631115  |
| UPP2 | Pentose phosphate pathway                         | CESC | -0.179013333 |
| UPP2 | Pericyte                                          | CESC | 0.02738455   |
| UPP2 | Phenylalanine metabolism                          | CESC | -0.115367804 |
| UPP2 | Phenylalanine, tyrosine and tryptophan metabolism | CESC | -0.077222998 |
| UPP2 | Phosphonate and phosphite metabolism              | CESC | -0.056793023 |
| UPP2 | Pi3k_akt_activation                               | CESC | -0.016218819 |
| UPP2 | Pi3k_akt_mtor_signaling                           | CESC | -0.316149824 |
| UPP2 | Porphyrin and chlorophyll metabolism              | CESC | -0.067976535 |
| UPP2 | Primary bile acid biosynthesis                    | CESC | 0.161936752  |
| UPP2 | Propanoate metabolism                             | CESC | -0.013767361 |
| UPP2 | Purine metabolism                                 | CESC | -0.104918899 |
| UPP2 | Pyrimidine metabolism                             | CESC | -0.200250612 |
| UPP2 | Pyruvate metabolism                               | CESC | -0.041351242 |
| UPP2 | Regulation_of_autophagy                           | CESC | -0.049733936 |
| UPP2 | Retinol metabolism                                | CESC | 8.98E-06     |
| UPP2 | Riboflavin metabolism                             | CESC | 0.109213784  |
| UPP2 | Schmahl_pdgf_signaling                            | CESC | -0.116218473 |
| UPP2 | Selenocompound metabolism                         | CESC | 0.219705106  |
| UPP2 | Signaling_by_hippo                                | CESC | -0.116430217 |
| UPP2 | Sphingolipid metabolism                           | CESC | 0.076776741  |
| UPP2 | Starch and sucrose metabolism                     | CESC | -0.06476654  |
| UPP2 | Steroid biosynthesis                              | CESC | -0.133259313 |
| UPP2 | Steroid hormone biosynthesis                      | CESC | -0.072325559 |
| UPP2 | Sulfur metabolism                                 | CESC | 0.12643047   |
| UPP2 | Synthesis and degradation of ribonucleotides      | CESC | -0.008654527 |
| UPP2 | T helper cell                                     | CESC | -0.033577321 |
| UPP2 | T helper1 (th1) cell                              | CESC | -0.1245839   |
| UPP2 | T helper17 (th17) cell                            | CESC | -0.214972629 |
| UPP2 | T helper2 (th2) cell                              | CESC | -0.108975529 |
| UPP2 | T helper9 (th9) cell                              | CESC | -0.109895907 |
| UPP2 | Taurine and hypotaurine interconversions          | CESC | 0.290179468  |
| UPP2 | Terpenoid backbone biosynthesis                   | CESC | -0.141845636 |
| UPP2 | Tgf_beta_signaling_pathway                        | CESC | -0.120065135 |
| UPP2 | Thiamine metabolism                               | CESC | 0.191188534  |
| UPP2 | Tnfa_signaling_via_nfkappaB                       | CESC | -0.267394553 |
| UPP2 | Tryptophan metabolism                             | CESC | 0.08024904   |
| UPP2 | Tumor endothelial cell                            | CESC | -0.210269581 |
| UPP2 | Tyrosine metabolism                               | CESC | 0.017762716  |

|      |                            |      |              |
|------|----------------------------|------|--------------|
| UPP2 | Ubiquinone and other ter   | CESC | 0.059397953  |
| UPP2 | Valine, leucine and isoleu | CESC | 0.042230669  |
| UPP2 | Valine, leucine and isoleu | CESC | 0.033494809  |
| UPP2 | Vascular endothelial cell  | CESC | -0.015789098 |
| UPP2 | Vascular smooth muscle c   | CESC | 0.036238814  |
| UPP2 | Vegf_signaling_pathway     | CESC | -0.239014581 |
| UPP2 | Vitamin b6 metabolism      | CESC | 0.050911858  |
| UPP2 | Willert_wnt_signaling      | CESC | 0.02522054   |
| UPP2 | Wnt_beta_catenin_signali   | CESC | -0.123403027 |
| CDA  | Abnormal plasma cell       | CHOL | 0.440036691  |
| CDA  | Activated b cell           | CHOL | 0.020184287  |
| CDA  | Activated cd4+ t cell      | CHOL | 0.175423858  |
| CDA  | Activated t cell           | CHOL | 0.171657834  |
| CDA  | Alanine, aspartate and glu | CHOL | 0.134490617  |
| CDA  | Alcala_apoptosis           | CHOL | -0.139077974 |
| CDA  | Alpha-linolenic acid meta  | CHOL | 0.426216926  |
| CDA  | Amino sugar and nucleoti   | CHOL | 0.108725691  |
| CDA  | Ampk_pathway               | CHOL | -0.123768927 |
| CDA  | Angiogenesis               | CHOL | 0.088173299  |
| CDA  | Arachidonic acid metaboli  | CHOL | 0.502286752  |
| CDA  | Arginine and proline metæ  | CHOL | 0.227597762  |
| CDA  | Arginine biosynthesis      | CHOL | 0.335450251  |
| CDA  | Ascorbate and aldarate me  | CHOL | 0.129401541  |
| CDA  | Atypical memory b cell     | CHOL | 0.138493569  |
| CDA  | Ax1+siglec6+ dendritic ce  | CHOL | 0.181075319  |
| CDA  | B cell                     | CHOL | 0.054839166  |
| CDA  | B1 cell                    | CHOL | 0.07237993   |
| CDA  | Basal cell                 | CHOL | 0.285991812  |
| CDA  | Beta-alanine metabolism    | CHOL | 0.220594614  |
| CDA  | Biosynthesis of unsaturate | CHOL | 0.082752724  |
| CDA  | Biotin metabolism          | CHOL | -0.185419884 |
| CDA  | Butanoate metabolism       | CHOL | 0.35544702   |
| CDA  | Caffeine metabolism        | CHOL | 0.007524387  |
| CDA  | Cancer stem cell           | CHOL | 0.478811135  |
| CDA  | Cancer stem-like cell      | CHOL | 0.132053529  |
| CDA  | Cd4+ cytotoxic t cell      | CHOL | 0.192880577  |
| CDA  | Cd4+ memory t cell         | CHOL | 0.067458632  |
| CDA  | Cd4+ regulatory t cell     | CHOL | 0.1573621    |
| CDA  | Cd4+ t helper cell         | CHOL | 0.249313941  |
| CDA  | Cd4+cd25+ regulatory t c   | CHOL | 0.245411297  |
| CDA  | Cd8+ cytotoxic t cell      | CHOL | 0.250246197  |
| CDA  | Cd8+ regulatory t cell     | CHOL | 0.105981787  |
| CDA  | Cell_cycle                 | CHOL | 0.032014334  |

|     |                              |      |              |
|-----|------------------------------|------|--------------|
| CDA | Chandran_metastasis_top5     | CHOL | -0.195878668 |
| CDA | Citrate cycle (tca cycle)    | CHOL | 0.056007487  |
| CDA | Cysteine and methionine r    | CHOL | 0.139671413  |
| CDA | Cytokine induced killer c    | CHOL | 0.356050809  |
| CDA | D-arginine and d-ornithin    | CHOL | 0.270360999  |
| CDA | D-glutamine and d-glutan     | CHOL | -0.108762564 |
| CDA | Dendritic cell               | CHOL | 0.087734273  |
| CDA | Dna_repair                   | CHOL | -0.055091261 |
| CDA | Dna_replication              | CHOL | -0.063867579 |
| CDA | Double-negative memory       | CHOL | 0.106743636  |
| CDA | Drug metabolism - cytoch     | CHOL | 0.310946388  |
| CDA | Drug metabolism - other      | CHOL | 0.281910049  |
| CDA | E2f_targets                  | CHOL | -0.022414993 |
| CDA | Ecm_receptor_interaction     | CHOL | 0.061883509  |
| CDA | Effector cd4+ memory t (     | CHOL | 0.083340373  |
| CDA | Effector cd8+ memory t (     | CHOL | 0.039588577  |
| CDA | Effector memory t cell       | CHOL | 0.195008144  |
| CDA | Effector regulatory t (treg  | CHOL | 0.148846382  |
| CDA | Elvidge_hif1a_targets_up     | CHOL | -0.020272802 |
| CDA | Endothelial cell             | CHOL | 0.39544922   |
| CDA | Eosinophil                   | CHOL | 0.13666134   |
| CDA | Ether lipid metabolism       | CHOL | 0.292504118  |
| CDA | Exhausted cd4+ t cell        | CHOL | 0.128016741  |
| CDA | Exhausted cd8+ t cell        | CHOL | 0.075626754  |
| CDA | Exhausted t cell             | CHOL | 0.115350477  |
| CDA | Fat cell (adipocyte)         | CHOL | 0.18305431   |
| CDA | Fatty acid biosynthesis      | CHOL | 0.261917072  |
| CDA | Fatty acid degradation       | CHOL | 0.226819456  |
| CDA | Fatty acid elongation        | CHOL | 0.184231107  |
| CDA | Fibroblast                   | CHOL | 0.303473968  |
| CDA | Folate biosynthesis          | CHOL | 0.155302191  |
| CDA | Follicular b cell            | CHOL | 0.025731167  |
| CDA | Follicular dendritic cell    | CHOL | 0.065720556  |
| CDA | Follicular helper (tfh) t ce | CHOL | 0.192751949  |
| CDA | Follicular t cell            | CHOL | -0.357816209 |
| CDA | Foxp3+il-17+ t cell          | CHOL | 0.077022318  |
| CDA | Fructose and mannose me      | CHOL | 0.06214082   |
| CDA | G2m_checkpoint               | CHOL | -0.016793853 |
| CDA | Galactose metabolism         | CHOL | 0.100592699  |
| CDA | Galie_tumor_stemness_ge      | CHOL | 0.256537194  |
| CDA | Glutathione metabolism       | CHOL | 0.198184405  |
| CDA | Glycerolipid metabolism      | CHOL | 0.322259759  |
| CDA | Glycerophospholipid met      | CHOL | 0.486687059  |

|     |                            |      |              |
|-----|----------------------------|------|--------------|
| CDA | Glycine, serine and threor | CHOL | 0.152115338  |
| CDA | Glycolysis / gluconeogene  | CHOL | 0.139346407  |
| CDA | Glycosaminoglycan biosy    | CHOL | 0.039536898  |
| CDA | Glycosaminoglycan biosy    | CHOL | 0.243574819  |
| CDA | Glycosaminoglycan biosy    | CHOL | 0.471268561  |
| CDA | Glycosaminoglycan degra    | CHOL | 0.055596309  |
| CDA | Glycosphingolipid biosyn   | CHOL | 0.266720451  |
| CDA | Glycosphingolipid biosyn   | CHOL | 0.443078848  |
| CDA | Glycosphingolipid biosyn   | CHOL | 0.46790313   |
| CDA | Glycosylphosphatidylinos   | CHOL | -0.020340134 |
| CDA | Glyoxylate and dicarboxy   | CHOL | -0.025414474 |
| CDA | Granulocyte                | CHOL | 0.082136848  |
| CDA | Hedgehog_signaling         | CHOL | 0.166582312  |
| CDA | Histidine metabolism       | CHOL | 0.019035582  |
| CDA | Hypoxia                    | CHOL | 0.136170699  |
| CDA | Il-17alpha t cell          | CHOL | 0.249418727  |
| CDA | Il2_stat5_signaling        | CHOL | 0.301984931  |
| CDA | Il6_jak_stat3_signaling    | CHOL | 0.140186327  |
| CDA | Immune_checkpoints_tun     | CHOL | 0.000407219  |
| CDA | Immune_inhibition_cytok    | CHOL | 0.288874297  |
| CDA | Inositol phosphate metabo  | CHOL | 0.184248214  |
| CDA | Interleukin_6_signaling    | CHOL | -0.192690169 |
| CDA | Jaeger_metastasis_up       | CHOL | 0.051169117  |
| CDA | Jain_nfkb_signaling        | CHOL | -0.401259586 |
| CDA | Kras_signaling_up          | CHOL | 0.259083938  |
| CDA | Linoleic acid metabolism   | CHOL | 0.279127606  |
| CDA | Lipoic acid metabolism     | CHOL | -0.168540239 |
| CDA | Lysine degradation         | CHOL | -0.023549803 |
| CDA | Lysosome                   | CHOL | 0.134113155  |
| CDA | M1 macrophage              | CHOL | 0.060607907  |
| CDA | M2 macrophage              | CHOL | 0.278808887  |
| CDA | Mannose type o-glycan bi   | CHOL | 0.002538008  |
| CDA | Mapk_signaling_pathway     | CHOL | 0.177315686  |
| CDA | Mapk3_erk1_activation      | CHOL | -0.025724475 |
| CDA | Marginal zone b cell       | CHOL | -0.009655685 |
| CDA | Memory b cell              | CHOL | -0.115057474 |
| CDA | Mesenchymal cell           | CHOL | 0.297388305  |
| CDA | Mesenchymal stem cell      | CHOL | 0.322201131  |
| CDA | Metabolism of xenobiotic   | CHOL | 0.365142652  |
| CDA | Migrating cancer stem cel  | CHOL | 0.089906032  |
| CDA | Mitotic_spindle            | CHOL | -0.214912381 |
| CDA | Monocyte                   | CHOL | 0.232378427  |
| CDA | Mtor_signaling_pathway     | CHOL | 0.056881562  |

|     |                                                   |      |              |
|-----|---------------------------------------------------|------|--------------|
| CDA | Mtorc1_signaling                                  | CHOL | 0.171026317  |
| CDA | Mucin type o-glycan biosynthesis                  | CHOL | 0.435995079  |
| CDA | Myc_targets_v1                                    | CHOL | 0.025015722  |
| CDA | Myeloid cell                                      | CHOL | 0.189049447  |
| CDA | N-glycan biosynthesis                             | CHOL | 0.120009324  |
| CDA | Naive b cell                                      | CHOL | 0.160701994  |
| CDA | Naive cd4+ t cell                                 | CHOL | 0.107009213  |
| CDA | Naive cd8+ t cell                                 | CHOL | -0.049966383 |
| CDA | Natural killer cell                               | CHOL | 0.162248534  |
| CDA | Natural killer t (nkt) cell                       | CHOL | 0.013232144  |
| CDA | Natural regulatory t (treg) cell                  | CHOL | 0.13935219   |
| CDA | Neomycin, kanamycin and streptomycin              | CHOL | 0.233068228  |
| CDA | Neutrophil                                        | CHOL | 0.332281243  |
| CDA | Nicotinate and nicotinamide metabolism            | CHOL | 0.47582423   |
| CDA | Nitrogen metabolism                               | CHOL | 0.511884794  |
| CDA | Nod_like_receptor_signaling                       | CHOL | 0.100281461  |
| CDA | Notch_signaling                                   | CHOL | -0.122794556 |
| CDA | One carbon pool by folate                         | CHOL | -0.160025926 |
| CDA | Other glycan degradation                          | CHOL | 0.128993433  |
| CDA | Other types of o-glycan biosynthesis              | CHOL | 0.121068485  |
| CDA | Oxidative phosphorylation                         | CHOL | 0.076413726  |
| CDA | P53_pathway                                       | CHOL | 0.283499858  |
| CDA | P53_signaling_pathway                             | CHOL | 0.06793466   |
| CDA | Pantothenate and coenzyme a biosynthesis          | CHOL | 0.398514578  |
| CDA | Pentose and glucuronate interconversions          | CHOL | 0.178633434  |
| CDA | Pentose phosphate pathway                         | CHOL | 0.241919138  |
| CDA | Pericyte                                          | CHOL | 0.352583778  |
| CDA | Phenylalanine metabolism                          | CHOL | 0.079794795  |
| CDA | Phenylalanine, tyrosine and tryptophan metabolism | CHOL | 0.040235504  |
| CDA | Phosphonate and phosphite metabolism              | CHOL | 0.230883965  |
| CDA | Pi3k_akt_activation                               | CHOL | 0.307621615  |
| CDA | Pi3k_akt_mtor_signaling                           | CHOL | 0.23647705   |
| CDA | Porphyrin and chlorophyll metabolism              | CHOL | 0.108434223  |
| CDA | Primary bile acid biosynthesis                    | CHOL | 0.257079253  |
| CDA | Propanoate metabolism                             | CHOL | 0.165994117  |
| CDA | Purine metabolism                                 | CHOL | 0.078969346  |
| CDA | Pyrimidine metabolism                             | CHOL | -0.016658506 |
| CDA | Pyruvate metabolism                               | CHOL | 0.152554051  |
| CDA | Regulation_of_autophagy                           | CHOL | 0.029412015  |
| CDA | Retinol metabolism                                | CHOL | 0.381510674  |
| CDA | Riboflavin metabolism                             | CHOL | 0.002401628  |
| CDA | Schmahl_pdgf_signaling                            | CHOL | 0.191411128  |
| CDA | Selenocompound metabolism                         | CHOL | 0.196577891  |



|      |                            |      |              |
|------|----------------------------|------|--------------|
| CDA  | Signaling_by_hippo         | CHOL | -0.053535203 |
| CDA  | Sphingolipid metabolism    | CHOL | 0.116051783  |
| CDA  | Starch and sucrose metabo  | CHOL | 0.288840872  |
| CDA  | Steroid biosynthesis       | CHOL | 0.070579241  |
| CDA  | Steroid hormone biosynth   | CHOL | 0.147748335  |
| CDA  | Sulfur metabolism          | CHOL | 0.264145555  |
| CDA  | Synthesis and degradation  | CHOL | 0.589672972  |
| CDA  | T helper cell              | CHOL | 0.214192879  |
| CDA  | T helper1 (th1) cell       | CHOL | 0.228225066  |
| CDA  | T helper17 (th17) cell     | CHOL | 0.170390581  |
| CDA  | T helper2 (th2) cell       | CHOL | 0.193716265  |
| CDA  | T helper9 (th9) cell       | CHOL | 0.245100007  |
| CDA  | Taurine and hypotaurine r  | CHOL | 0.140122278  |
| CDA  | Terpenoid backbone biosy   | CHOL | 0.029133546  |
| CDA  | Tgf_beta_signaling_pathw   | CHOL | 0.018743523  |
| CDA  | Thiamine metabolism        | CHOL | 0.418529981  |
| CDA  | Tnfa_signaling_via_nfk     | CHOL | 0.066421951  |
| CDA  | Tryptophan metabolism      | CHOL | 0.10578924   |
| CDA  | Tumor endothelial cell     | CHOL | -0.049818742 |
| CDA  | Tyrosine metabolism        | CHOL | 0.31529653   |
| CDA  | Ubiquinone and other ter   | CHOL | 0.24539403   |
| CDA  | Valine, leucine and isoleu | CHOL | -0.020451998 |
| CDA  | Valine, leucine and isoleu | CHOL | 0.212700707  |
| CDA  | Vascular endothelial cell  | CHOL | 0.222578672  |
| CDA  | Vascular smooth muscle c   | CHOL | 0.104817072  |
| CDA  | Vegf_signaling_pathway     | CHOL | 0.523090753  |
| CDA  | Vitamin b6 metabolism      | CHOL | 0.261602461  |
| CDA  | Willert_wnt_signaling      | CHOL | 0.183964363  |
| CDA  | Wnt_beta_catenin_signali   | CHOL | 0.181974978  |
| UCK1 | Abnormal plasma cell       | CHOL | 0.25033424   |
| UCK1 | Activated b cell           | CHOL | 0.184842422  |
| UCK1 | Activated cd4+ t cell      | CHOL | 0.109730014  |
| UCK1 | Activated t cell           | CHOL | 0.122435199  |
| UCK1 | Alanine, aspartate and glu | CHOL | 0.106652282  |
| UCK1 | Alcala_apoptosis           | CHOL | 0.477555245  |
| UCK1 | Alpha-linolenic acid meta  | CHOL | -0.209178801 |
| UCK1 | Amino sugar and nucleoti   | CHOL | 0.052699467  |
| UCK1 | Ampk_pathway               | CHOL | 0.2643705    |
| UCK1 | Angiogenesis               | CHOL | -0.335648099 |
| UCK1 | Arachidonic acid metabol   | CHOL | -0.053473281 |
| UCK1 | Arginine and proline met   | CHOL | 0.115632927  |
| UCK1 | Arginine biosynthesis      | CHOL | 0.150614779  |
| UCK1 | Ascorbate and aldarate m   | CHOL | -0.209304796 |

|      |                                      |      |              |
|------|--------------------------------------|------|--------------|
| UCK1 | Atypical memory b cell               | CHOL | -0.043153548 |
| UCK1 | Ax1+siglec6+ dendritic ce            | CHOL | -0.119546354 |
| UCK1 | B cell                               | CHOL | 0.115476392  |
| UCK1 | B1 cell                              | CHOL | 0.168933316  |
| UCK1 | Basal cell                           | CHOL | -0.439617431 |
| UCK1 | Beta-alanine metabolism              | CHOL | -0.062560417 |
| UCK1 | Biosynthesis of unsaturate           | CHOL | 0.203170706  |
| UCK1 | Biotin metabolism                    | CHOL | 0.005303608  |
| UCK1 | Butanoate metabolism                 | CHOL | 0.304746484  |
| UCK1 | Caffeine metabolism                  | CHOL | -0.118737756 |
| UCK1 | Cancer stem cell                     | CHOL | -0.336218926 |
| UCK1 | Cancer stem-like cell                | CHOL | -0.231919925 |
| UCK1 | Cd4+ cytotoxic t cell                | CHOL | 0.078901625  |
| UCK1 | Cd4+ memory t cell                   | CHOL | 0.024742     |
| UCK1 | Cd4+ regulatory t cell               | CHOL | 0.169323244  |
| UCK1 | Cd4+ t helper cell                   | CHOL | 0.112190443  |
| UCK1 | Cd4+cd25+ regulatory t c             | CHOL | 0.114895535  |
| UCK1 | Cd8+ cytotoxic t cell                | CHOL | 0.222003737  |
| UCK1 | Cd8+ regulatory t cell               | CHOL | 0.131455824  |
| UCK1 | Cell_cycle                           | CHOL | 0.05190649   |
| UCK1 | Chandran_metastasis_top <sup>5</sup> | CHOL | -0.174763963 |
| UCK1 | Citrate cycle (tca cycle)            | CHOL | 0.416328394  |
| UCK1 | Cysteine and methionine r            | CHOL | 0.038591426  |
| UCK1 | Cytokine induced killer c $\epsilon$ | CHOL | 0.2754912    |
| UCK1 | D-arginine and d-ornithin            | CHOL | 0.012644398  |
| UCK1 | D-glutamine and d-glutan             | CHOL | -0.149969796 |
| UCK1 | Dendritic cell                       | CHOL | 0.057453911  |
| UCK1 | Dna_repair                           | CHOL | 0.603521093  |
| UCK1 | Dna_replication                      | CHOL | 0.425723549  |
| UCK1 | Double-negative memory               | CHOL | 0.098572201  |
| UCK1 | Drug metabolism - cytoch             | CHOL | -0.241542291 |
| UCK1 | Drug metabolism - other (            | CHOL | 0.062980301  |
| UCK1 | E2f_targets                          | CHOL | 0.126930702  |
| UCK1 | Ecm_receptor_interaction             | CHOL | -0.452509908 |
| UCK1 | Effector cd4+ memory t (             | CHOL | -0.037862057 |
| UCK1 | Effector cd8+ memory t (             | CHOL | 0.041554747  |
| UCK1 | Effector memory t cell               | CHOL | 0.00514211   |
| UCK1 | Effector regulatory t (treg          | CHOL | 0.052505462  |
| UCK1 | Elvidge_hif1a_targets_up             | CHOL | -0.09683031  |
| UCK1 | Endothelial cell                     | CHOL | -0.274688551 |
| UCK1 | Eosinophil                           | CHOL | 0.051077309  |
| UCK1 | Ether lipid metabolism               | CHOL | -0.240172217 |
| UCK1 | Exhausted cd4+ t cell                | CHOL | 0.005908897  |

|      |                              |      |              |
|------|------------------------------|------|--------------|
| UCK1 | Exhausted cd8+ t cell        | CHOL | -0.061240828 |
| UCK1 | Exhausted t cell             | CHOL | 0.194554968  |
| UCK1 | Fat cell (adipocyte)         | CHOL | 0.26823098   |
| UCK1 | Fatty acid biosynthesis      | CHOL | 0.353417618  |
| UCK1 | Fatty acid degradation       | CHOL | 0.120362906  |
| UCK1 | Fatty acid elongation        | CHOL | 0.289559513  |
| UCK1 | Fibroblast                   | CHOL | -0.265597867 |
| UCK1 | Folate biosynthesis          | CHOL | 0.182001629  |
| UCK1 | Follicular b cell            | CHOL | 0.031961221  |
| UCK1 | Follicular dendritic cell    | CHOL | 0.040810683  |
| UCK1 | Follicular helper (tfh) t ce | CHOL | 0.067042216  |
| UCK1 | Follicular t cell            | CHOL | -0.108545361 |
| UCK1 | Foxp3+il-17+ t cell          | CHOL | 0.25045294   |
| UCK1 | Fructose and mannose me      | CHOL | 0.02224256   |
| UCK1 | G2m_checkpoint               | CHOL | -0.046681665 |
| UCK1 | Galactose metabolism         | CHOL | 0.336329371  |
| UCK1 | Galie_tumor_stemness_ge      | CHOL | 0.025671901  |
| UCK1 | Glutathione metabolism       | CHOL | 0.039101419  |
| UCK1 | Glycerolipid metabolism      | CHOL | 0.088331107  |
| UCK1 | Glycerophospholipid metæ     | CHOL | 0.133414245  |
| UCK1 | Glycine, serine and threor   | CHOL | 0.202303551  |
| UCK1 | Glycolysis / gluconeogene    | CHOL | 0.229803654  |
| UCK1 | Glycosaminoglycan biosy1     | CHOL | 0.063639937  |
| UCK1 | Glycosaminoglycan biosy1     | CHOL | 0.099379509  |
| UCK1 | Glycosaminoglycan biosy1     | CHOL | 0.006264349  |
| UCK1 | Glycosaminoglycan degra      | CHOL | 0.113826464  |
| UCK1 | Glycosphingolipid biosyn1    | CHOL | 0.292287233  |
| UCK1 | Glycosphingolipid biosyn1    | CHOL | 0.007016891  |
| UCK1 | Glycosphingolipid biosyn1    | CHOL | -0.254917545 |
| UCK1 | Glycosylphosphatidylinos:    | CHOL | 0.216945139  |
| UCK1 | Glyoxylate and dicarboxy     | CHOL | 0.319532418  |
| UCK1 | Granulocyte                  | CHOL | 0.009355299  |
| UCK1 | Hedgehog_signaling           | CHOL | -0.372996394 |
| UCK1 | Histidine metabolism         | CHOL | -0.182954706 |
| UCK1 | Hypoxia                      | CHOL | -0.109083343 |
| UCK1 | Il-17ralpha t cell           | CHOL | 0.102846127  |
| UCK1 | Il2_stat5_signaling          | CHOL | -0.014854199 |
| UCK1 | Il6_jak_stat3_signaling      | CHOL | -0.127788584 |
| UCK1 | Immune_checkpoints_tunr      | CHOL | -0.19943141  |
| UCK1 | Immune_inhibition_cytok      | CHOL | -0.052970649 |
| UCK1 | Inositol phosphate metabo    | CHOL | -0.264478881 |
| UCK1 | Interleukin_6_signaling      | CHOL | -0.381580834 |
| UCK1 | Jaeger_metastasis_up         | CHOL | -0.01754257  |

|      |                             |      |              |
|------|-----------------------------|------|--------------|
| UCK1 | Jain_nfkb_signaling         | CHOL | 0.2111691    |
| UCK1 | Kras_signaling_up           | CHOL | -0.286295416 |
| UCK1 | Linoleic acid metabolism    | CHOL | -0.357134106 |
| UCK1 | Lipoic acid metabolism      | CHOL | 0.180169292  |
| UCK1 | Lysine degradation          | CHOL | 0.110159755  |
| UCK1 | Lysosome                    | CHOL | 0.134758287  |
| UCK1 | M1 macrophage               | CHOL | -0.001432449 |
| UCK1 | M2 macrophage               | CHOL | 0.079083805  |
| UCK1 | Mannose type o-glycan bi    | CHOL | 0.200528988  |
| UCK1 | Mapk_signaling_pathway      | CHOL | -0.335881051 |
| UCK1 | Mapk3_erk1_activation       | CHOL | -0.300795755 |
| UCK1 | Marginal zone b cell        | CHOL | -0.023000829 |
| UCK1 | Memory b cell               | CHOL | 0.083944017  |
| UCK1 | Mesenchymal cell            | CHOL | -0.164497442 |
| UCK1 | Mesenchymal stem cell       | CHOL | -0.260527975 |
| UCK1 | Metabolism of xenobiotic    | CHOL | -0.122958743 |
| UCK1 | Migrating cancer stem cel   | CHOL | -0.272989867 |
| UCK1 | Mitotic_spindle             | CHOL | -0.444995838 |
| UCK1 | Monocyte                    | CHOL | 0.019676231  |
| UCK1 | Mtor_signaling_pathway      | CHOL | 0.271572757  |
| UCK1 | Mtorc1_signaling            | CHOL | 0.19443837   |
| UCK1 | Mucin type o-glycan biosy   | CHOL | -0.222326522 |
| UCK1 | Myc_targets_v1              | CHOL | 0.483901546  |
| UCK1 | Myeloid cell                | CHOL | 0.053014819  |
| UCK1 | N-glycan biosynthesis       | CHOL | 0.244624933  |
| UCK1 | Naive b cell                | CHOL | 0.104021724  |
| UCK1 | Naive cd4+ t cell           | CHOL | -0.012130186 |
| UCK1 | Naive cd8+ t cell           | CHOL | -0.042760385 |
| UCK1 | Natural killer cell         | CHOL | 0.157191392  |
| UCK1 | Natural killer t (nkt) cell | CHOL | 0.306581111  |
| UCK1 | Natural regulatory t (treg) | CHOL | 0.055156979  |
| UCK1 | Neomycin, kanamycin and     | CHOL | -0.122781307 |
| UCK1 | Neutrophil                  | CHOL | -0.170142142 |
| UCK1 | Nicotinate and nicotinami   | CHOL | 0.255651122  |
| UCK1 | Nitrogen metabolism         | CHOL | -0.141482185 |
| UCK1 | Nod_like_receptor_signal    | CHOL | -0.158211487 |
| UCK1 | Notch_signaling             | CHOL | -0.454125061 |
| UCK1 | One carbon pool by folate   | CHOL | -0.014016157 |
| UCK1 | Other glycan degradation    | CHOL | 0.220808164  |
| UCK1 | Other types of o-glycan b   | CHOL | 0.280020719  |
| UCK1 | Oxidative phosphorylatio    | CHOL | 0.639339988  |
| UCK1 | P53_pathway                 | CHOL | 0.114305029  |
| UCK1 | P53_signaling_pathway       | CHOL | -0.161907426 |

|      |                            |      |              |
|------|----------------------------|------|--------------|
| UCK1 | Pantothenate and coa bios  | CHOL | 0.265005264  |
| UCK1 | Pentose and glucuronate i  | CHOL | -0.23168757  |
| UCK1 | Pentose phosphate pathwa   | CHOL | 0.358744765  |
| UCK1 | Pericyte                   | CHOL | -0.235599624 |
| UCK1 | Phenylalanine metabolism   | CHOL | -0.007450176 |
| UCK1 | Phenylalanine, tyrosine ar | CHOL | 0.194158646  |
| UCK1 | Phosphonate and phosphir   | CHOL | 0.096314679  |
| UCK1 | Pi3k_akt_activation        | CHOL | -0.060736606 |
| UCK1 | Pi3k_akt_mtor_signaling    | CHOL | 0.454662909  |
| UCK1 | Porphyrin and chlorophyl   | CHOL | 0.188359361  |
| UCK1 | Primary bile acid biosynt  | CHOL | -0.001078597 |
| UCK1 | Propanoate metabolism      | CHOL | 0.300386869  |
| UCK1 | Purine metabolism          | CHOL | 0.182159633  |
| UCK1 | Pyrimidine metabolism      | CHOL | 0.36774172   |
| UCK1 | Pyruvate metabolism        | CHOL | 0.269566099  |
| UCK1 | Regulation_of_autophagy    | CHOL | 0.504897716  |
| UCK1 | Retinol metabolism         | CHOL | -0.152032428 |
| UCK1 | Riboflavin metabolism      | CHOL | 0.173322298  |
| UCK1 | Schmahl_pdgf_signaling     | CHOL | -0.410316649 |
| UCK1 | Selenocompound metabol     | CHOL | -0.015660526 |
| UCK1 | Signaling_by_hippo         | CHOL | -0.410395631 |
| UCK1 | Sphingolipid metabolism    | CHOL | -0.179933535 |
| UCK1 | Starch and sucrose metabo  | CHOL | 0.246473048  |
| UCK1 | Steroid biosynthesis       | CHOL | 0.06002549   |
| UCK1 | Steroid hormone biosynth   | CHOL | -0.255017897 |
| UCK1 | Sulfur metabolism          | CHOL | -0.156596131 |
| UCK1 | Synthesis and degradation  | CHOL | 0.176767986  |
| UCK1 | T helper cell              | CHOL | 0.11298157   |
| UCK1 | T helper1 (th1) cell       | CHOL | 0.240331124  |
| UCK1 | T helper17 (th17) cell     | CHOL | 0.027121375  |
| UCK1 | T helper2 (th2) cell       | CHOL | 0.113115432  |
| UCK1 | T helper9 (th9) cell       | CHOL | 0.181591749  |
| UCK1 | Taurine and hypotaurine r  | CHOL | -0.281339169 |
| UCK1 | Terpenoid backbone biosy   | CHOL | 0.183673948  |
| UCK1 | Tgf_beta_signaling_pathw   | CHOL | -0.490585547 |
| UCK1 | Thiamine metabolism        | CHOL | 0.329884938  |
| UCK1 | Tnfa_signaling_via_nfk     | CHOL | -0.314090686 |
| UCK1 | Tryptophan metabolism      | CHOL | 0.180918935  |
| UCK1 | Tumor endothelial cell     | CHOL | 0.131594578  |
| UCK1 | Tyrosine metabolism        | CHOL | -0.062560448 |
| UCK1 | Ubiquinone and other ter   | CHOL | 0.30481179   |
| UCK1 | Valine, leucine and isoleu | CHOL | 0.053080652  |
| UCK1 | Valine, leucine and isoleu | CHOL | 0.286943768  |

|      |                            |      |              |
|------|----------------------------|------|--------------|
| UCK1 | Vascular endothelial cell  | CHOL | -0.173338772 |
| UCK1 | Vascular smooth muscle c   | CHOL | -0.300106972 |
| UCK1 | Vegf_signaling_pathway     | CHOL | 0.239685591  |
| UCK1 | Vitamin b6 metabolism      | CHOL | 0.21903279   |
| UCK1 | Willert_wnt_signaling      | CHOL | 0.001607851  |
| UCK1 | Wnt_beta_catenin_signali   | CHOL | -0.253379197 |
| UCK2 | Abnormal plasma cell       | CHOL | -0.237426555 |
| UCK2 | Activated b cell           | CHOL | -0.221876947 |
| UCK2 | Activated cd4+ t cell      | CHOL | -0.284095646 |
| UCK2 | Activated t cell           | CHOL | -0.201302083 |
| UCK2 | Alanine, aspartate and glu | CHOL | -0.028863641 |
| UCK2 | Alcala_apoptosis           | CHOL | 0.061640783  |
| UCK2 | Alpha-linolenic acid meta  | CHOL | -0.16399124  |
| UCK2 | Amino sugar and nucleoti   | CHOL | 0.113511226  |
| UCK2 | Ampk_pathway               | CHOL | -0.114596422 |
| UCK2 | Angiogenesis               | CHOL | 0.161520028  |
| UCK2 | Arachidonic acid metabol   | CHOL | -0.108235456 |
| UCK2 | Arginine and proline meta  | CHOL | 0.109981305  |
| UCK2 | Arginine biosynthesis      | CHOL | -0.161532798 |
| UCK2 | Ascorbate and aldarate me  | CHOL | 0.109569998  |
| UCK2 | Atypical memory b cell     | CHOL | -0.171850762 |
| UCK2 | Axl+siglec6+ dendritic ce  | CHOL | -0.112666941 |
| UCK2 | B cell                     | CHOL | -0.264240255 |
| UCK2 | B1 cell                    | CHOL | -0.185608043 |
| UCK2 | Basal cell                 | CHOL | 0.198840316  |
| UCK2 | Beta-alanine metabolism    | CHOL | -0.022749088 |
| UCK2 | Biosynthesis of unsaturate | CHOL | -0.15880204  |
| UCK2 | Biotin metabolism          | CHOL | 0.350469355  |
| UCK2 | Butanoate metabolism       | CHOL | -0.278062012 |
| UCK2 | Caffeine metabolism        | CHOL | 0.086532065  |
| UCK2 | Cancer stem cell           | CHOL | -0.054871812 |
| UCK2 | Cancer stem-like cell      | CHOL | 0.276660499  |
| UCK2 | Cd4+ cytotoxic t cell      | CHOL | -0.117729698 |
| UCK2 | Cd4+ memory t cell         | CHOL | -0.186478978 |
| UCK2 | Cd4+ regulatory t cell     | CHOL | -0.181483303 |
| UCK2 | Cd4+ t helper cell         | CHOL | -0.203686663 |
| UCK2 | Cd4+cd25+ regulatory t c   | CHOL | -0.195643289 |
| UCK2 | Cd8+ cytotoxic t cell      | CHOL | -0.255868697 |
| UCK2 | Cd8+ regulatory t cell     | CHOL | -0.111161416 |
| UCK2 | Cell_cycle                 | CHOL | 0.253186475  |
| UCK2 | Chandran_metastasis_top5   | CHOL | 0.207231192  |
| UCK2 | Citrate cycle (tca cycle)  | CHOL | -0.057158514 |
| UCK2 | Cysteine and methionine r  | CHOL | 0.056541484  |

|      |                              |      |              |
|------|------------------------------|------|--------------|
| UCK2 | Cytokine induced killer cell | CHOL | -0.269405642 |
| UCK2 | D-arginine and d-ornithin    | CHOL | -0.006867537 |
| UCK2 | D-glutamine and d-glutan     | CHOL | -0.056813147 |
| UCK2 | Dendritic cell               | CHOL | -0.263327225 |
| UCK2 | Dna_repair                   | CHOL | 0.137777248  |
| UCK2 | Dna_replication              | CHOL | 0.01395674   |
| UCK2 | Double-negative memory       | CHOL | -0.216998111 |
| UCK2 | Drug metabolism - cytoch     | CHOL | 0.015756954  |
| UCK2 | Drug metabolism - other      | CHOL | 0.101351122  |
| UCK2 | E2f_targets                  | CHOL | 0.190673135  |
| UCK2 | Ecm_receptor_interaction     | CHOL | 0.120357577  |
| UCK2 | Effector cd4+ memory t (     | CHOL | -0.185491224 |
| UCK2 | Effector cd8+ memory t (     | CHOL | -0.037580189 |
| UCK2 | Effector memory t cell       | CHOL | -0.149161779 |
| UCK2 | Effector regulatory t (treg  | CHOL | -0.115604518 |
| UCK2 | Elvidge_hif1a_targets_up     | CHOL | 0.38003561   |
| UCK2 | Endothelial cell             | CHOL | -0.117095983 |
| UCK2 | Eosinophil                   | CHOL | -0.145028602 |
| UCK2 | Ether lipid metabolism       | CHOL | -0.15998525  |
| UCK2 | Exhausted cd4+ t cell        | CHOL | -0.284001017 |
| UCK2 | Exhausted cd8+ t cell        | CHOL | -0.141903464 |
| UCK2 | Exhausted t cell             | CHOL | -0.228743457 |
| UCK2 | Fat cell (adipocyte)         | CHOL | -0.372443565 |
| UCK2 | Fatty acid biosynthesis      | CHOL | 0.004219437  |
| UCK2 | Fatty acid degradation       | CHOL | -0.054907508 |
| UCK2 | Fatty acid elongation        | CHOL | -0.101205814 |
| UCK2 | Fibroblast                   | CHOL | -0.108493428 |
| UCK2 | Folate biosynthesis          | CHOL | 0.091382916  |
| UCK2 | Follicular b cell            | CHOL | -0.249557287 |
| UCK2 | Follicular dendritic cell    | CHOL | -0.263837168 |
| UCK2 | Follicular helper (tfh) t ce | CHOL | -0.30274601  |
| UCK2 | Follicular t cell            | CHOL | -0.014953855 |
| UCK2 | Foxp3+il-17+ t cell          | CHOL | -0.329389577 |
| UCK2 | Fructose and mannose me      | CHOL | 0.174999757  |
| UCK2 | G2m_checkpoint               | CHOL | 0.268944589  |
| UCK2 | Galactose metabolism         | CHOL | 0.094972056  |
| UCK2 | Galie_tumor_stemness_ge      | CHOL | -0.089050164 |
| UCK2 | Glutathione metabolism       | CHOL | 0.090319734  |
| UCK2 | Glycerolipid metabolism      | CHOL | -0.007355803 |
| UCK2 | Glycerophospholipid metæ     | CHOL | -0.17769281  |
| UCK2 | Glycine, serine and threor   | CHOL | -0.040231762 |
| UCK2 | Glycolysis / gluconeogene    | CHOL | 0.148502387  |
| UCK2 | Glycosaminoglycan biosy      | CHOL | 0.020806539  |

|      |                           |      |              |
|------|---------------------------|------|--------------|
| UCK2 | Glycosaminoglycan biosyn  | CHOL | -0.026711127 |
| UCK2 | Glycosaminoglycan biosyn  | CHOL | 0.114072425  |
| UCK2 | Glycosaminoglycan degra   | CHOL | 0.080134409  |
| UCK2 | Glycosphingolipid biosyn  | CHOL | -0.213305178 |
| UCK2 | Glycosphingolipid biosyn  | CHOL | 0.044483925  |
| UCK2 | Glycosphingolipid biosyn  | CHOL | 0.16134754   |
| UCK2 | Glycosylphosphatidylinos  | CHOL | 0.22523259   |
| UCK2 | Glyoxylate and dicarboxy  | CHOL | 0.143927677  |
| UCK2 | Granulocyte               | CHOL | -0.049679097 |
| UCK2 | Hedgehog_signaling        | CHOL | 0.010070902  |
| UCK2 | Histidine metabolism      | CHOL | 0.191408541  |
| UCK2 | Hypoxia                   | CHOL | -0.088829731 |
| UCK2 | Il-17alpha t cell         | CHOL | -0.203314258 |
| UCK2 | Il2_stat5_signaling       | CHOL | -0.165774618 |
| UCK2 | Il6_jak_stat3_signaling   | CHOL | -0.095487977 |
| UCK2 | Immune_checkpoints_tunr   | CHOL | 0.104828809  |
| UCK2 | Immune_inhibition_cytok   | CHOL | -0.210289198 |
| UCK2 | Inositol phosphate metabo | CHOL | -0.02217458  |
| UCK2 | Interleukin_6_signaling   | CHOL | -0.046943162 |
| UCK2 | Jaeger_metastasis_up      | CHOL | -0.030075278 |
| UCK2 | Jain_nfkb_signaling       | CHOL | 0.310099068  |
| UCK2 | Kras_signaling_up         | CHOL | -0.108303489 |
| UCK2 | Linoleic acid metabolism  | CHOL | -0.031266184 |
| UCK2 | Lipoic acid metabolism    | CHOL | -0.063648706 |
| UCK2 | Lysine degradation        | CHOL | -0.078085066 |
| UCK2 | Lysosome                  | CHOL | -0.02562089  |
| UCK2 | M1 macrophage             | CHOL | -0.038097036 |
| UCK2 | M2 macrophage             | CHOL | -0.290339759 |
| UCK2 | Mannose type o-glycan bi  | CHOL | 0.232365082  |
| UCK2 | Mapk_signaling_pathway    | CHOL | -0.195242517 |
| UCK2 | Mapk3_erk1_activation     | CHOL | -0.141572058 |
| UCK2 | Marginal zone b cell      | CHOL | -0.15631027  |
| UCK2 | Memory b cell             | CHOL | -0.153972249 |
| UCK2 | Mesenchymal cell          | CHOL | 0.01418862   |
| UCK2 | Mesenchymal stem cell     | CHOL | -0.018071681 |
| UCK2 | Metabolism of xenobiotic  | CHOL | -0.015381339 |
| UCK2 | Migrating cancer stem cel | CHOL | 0.354358291  |
| UCK2 | Mitotic_spindle           | CHOL | 0.250546427  |
| UCK2 | Monocyte                  | CHOL | -0.173686342 |
| UCK2 | Mtor_signaling_pathway    | CHOL | -0.334536633 |
| UCK2 | Mtorc1_signaling          | CHOL | 0.057341353  |
| UCK2 | Mucin type o-glycan bios  | CHOL | -0.013198274 |
| UCK2 | Myc_targets_v1            | CHOL | 0.307070459  |



|      |                                                   |      |              |
|------|---------------------------------------------------|------|--------------|
| UCK2 | Myeloid cell                                      | CHOL | -0.198389179 |
| UCK2 | N-glycan biosynthesis                             | CHOL | 0.06253935   |
| UCK2 | Naive b cell                                      | CHOL | -0.248203243 |
| UCK2 | Naive cd4+ t cell                                 | CHOL | -0.159045806 |
| UCK2 | Naive cd8+ t cell                                 | CHOL | -0.088983054 |
| UCK2 | Natural killer cell                               | CHOL | -0.250484047 |
| UCK2 | Natural killer t (nkt) cell                       | CHOL | -0.164513951 |
| UCK2 | Natural regulatory t (treg) cell                  | CHOL | -0.185018468 |
| UCK2 | Neomycin, kanamycin and                           | CHOL | 0.092326632  |
| UCK2 | Neutrophil                                        | CHOL | -0.114307079 |
| UCK2 | Nicotinate and nicotinamide                       | CHOL | -0.458384456 |
| UCK2 | Nitrogen metabolism                               | CHOL | -0.004690489 |
| UCK2 | Nod_like_receptor_signaling                       | CHOL | -0.083011141 |
| UCK2 | Notch_signaling                                   | CHOL | 0.193586073  |
| UCK2 | One carbon pool by folate                         | CHOL | 0.260858052  |
| UCK2 | Other glycan degradation                          | CHOL | 0.074519898  |
| UCK2 | Other types of o-glycan biosynthesis              | CHOL | 0.179194434  |
| UCK2 | Oxidative phosphorylation                         | CHOL | -0.14289977  |
| UCK2 | P53_pathway                                       | CHOL | -0.266168633 |
| UCK2 | P53_signaling_pathway                             | CHOL | 0.011805364  |
| UCK2 | Pantothenate and coenzyme biosynthesis            | CHOL | -0.450345986 |
| UCK2 | Pentose and glucuronate interconversions          | CHOL | 0.074649755  |
| UCK2 | Pentose phosphate pathway                         | CHOL | 0.085881721  |
| UCK2 | Pericyte                                          | CHOL | -0.072469393 |
| UCK2 | Phenylalanine metabolism                          | CHOL | 0.09517633   |
| UCK2 | Phenylalanine, tyrosine and tryptophan metabolism | CHOL | 0.028909145  |
| UCK2 | Phosphonate and phosphite metabolism              | CHOL | -0.356718496 |
| UCK2 | Pi3k_akt_activation                               | CHOL | -0.25739522  |
| UCK2 | Pi3k_akt_mtor_signaling                           | CHOL | -0.212558299 |
| UCK2 | Porphyrin and chlorophyll metabolism              | CHOL | 0.05004288   |
| UCK2 | Primary bile acid biosynthesis                    | CHOL | -0.218358085 |
| UCK2 | Propanoate metabolism                             | CHOL | -0.074808675 |
| UCK2 | Purine metabolism                                 | CHOL | 0.4312112    |
| UCK2 | Pyrimidine metabolism                             | CHOL | 0.318093683  |
| UCK2 | Pyruvate metabolism                               | CHOL | 0.066248513  |
| UCK2 | Regulation_of_autophagy                           | CHOL | -0.282490596 |
| UCK2 | Retinol metabolism                                | CHOL | -0.062454189 |
| UCK2 | Riboflavin metabolism                             | CHOL | -0.024892205 |
| UCK2 | Schmahl_pdgf_signaling                            | CHOL | -0.116035877 |
| UCK2 | Selenocompound metabolism                         | CHOL | -0.1113738   |
| UCK2 | Signaling_by_hippo                                | CHOL | 0.242035721  |
| UCK2 | Sphingolipid metabolism                           | CHOL | 0.28775444   |
| UCK2 | Starch and sucrose metabolism                     | CHOL | -0.265296776 |

|       |                            |      |              |
|-------|----------------------------|------|--------------|
| UCK2  | Steroid biosynthesis       | CHOL | 0.201685228  |
| UCK2  | Steroid hormone biosynth   | CHOL | 0.115940141  |
| UCK2  | Sulfur metabolism          | CHOL | -0.040454664 |
| UCK2  | Synthesis and degradation  | CHOL | -0.366942541 |
| UCK2  | T helper cell              | CHOL | -0.30813372  |
| UCK2  | T helper1 (th1) cell       | CHOL | -0.281839016 |
| UCK2  | T helper17 (th17) cell     | CHOL | -0.238487607 |
| UCK2  | T helper2 (th2) cell       | CHOL | -0.266329861 |
| UCK2  | T helper9 (th9) cell       | CHOL | -0.235268526 |
| UCK2  | Taurine and hypotaurine r  | CHOL | 0.036214697  |
| UCK2  | Terpenoid backbone biosy   | CHOL | 0.070763093  |
| UCK2  | Tgf_beta_signaling_pathw   | CHOL | 0.165371966  |
| UCK2  | Thiamine metabolism        | CHOL | -0.232036685 |
| UCK2  | Tnfa_signaling_via_nfbk    | CHOL | -0.002365714 |
| UCK2  | Tryptophan metabolism      | CHOL | -0.081115662 |
| UCK2  | Tumor endothelial cell     | CHOL | 0.105303362  |
| UCK2  | Tyrosine metabolism        | CHOL | 0.077111856  |
| UCK2  | Ubiquinone and other terf  | CHOL | 0.103680882  |
| UCK2  | Valine, leucine and isoleu | CHOL | -0.078415345 |
| UCK2  | Valine, leucine and isoleu | CHOL | -0.141752978 |
| UCK2  | Vascular endothelial cell  | CHOL | -0.18774814  |
| UCK2  | Vascular smooth muscle c   | CHOL | -0.024128934 |
| UCK2  | Vegf_signaling_pathway     | CHOL | -0.355151003 |
| UCK2  | Vitamin b6 metabolism      | CHOL | 0.034961964  |
| UCK2  | Willert_wnt_signaling      | CHOL | 0.085477373  |
| UCK2  | Wnt_beta_catenin_signali   | CHOL | 0.200160861  |
| UCKL1 | Abnormal plasma cell       | CHOL | -0.042787917 |
| UCKL1 | Activated b cell           | CHOL | 0.147420762  |
| UCKL1 | Activated cd4+ t cell      | CHOL | -0.03489355  |
| UCKL1 | Activated t cell           | CHOL | 0.010115571  |
| UCKL1 | Alanine, aspartate and glu | CHOL | -0.334868529 |
| UCKL1 | Alcala_apoptosis           | CHOL | 0.104933912  |
| UCKL1 | Alpha-linolenic acid meta  | CHOL | -0.192863229 |
| UCKL1 | Amino sugar and nucleoti   | CHOL | -0.345864622 |
| UCKL1 | Ampk_pathway               | CHOL | 0.009951086  |
| UCKL1 | Angiogenesis               | CHOL | 0.012554807  |
| UCKL1 | Arachidonic acid metabol:  | CHOL | -0.089147687 |
| UCKL1 | Arginine and proline metæ  | CHOL | -0.124706416 |
| UCKL1 | Arginine biosynthesis      | CHOL | -0.303559709 |
| UCKL1 | Ascorbate and aldarate mε  | CHOL | -0.408731095 |
| UCKL1 | Atypical memory b cell     | CHOL | 0.092812025  |
| UCKL1 | Axl+siglec6+ dendritic ce  | CHOL | -0.100420176 |
| UCKL1 | B cell                     | CHOL | 0.039286001  |

|       |                             |      |              |
|-------|-----------------------------|------|--------------|
| UCKL1 | B1 cell                     | CHOL | 0.141778055  |
| UCKL1 | Basal cell                  | CHOL | 0.046364308  |
| UCKL1 | Beta-alanine metabolism     | CHOL | -0.403116953 |
| UCKL1 | Biosynthesis of unsaturate  | CHOL | -0.426031846 |
| UCKL1 | Biotin metabolism           | CHOL | -0.003479953 |
| UCKL1 | Butanoate metabolism        | CHOL | -0.36998801  |
| UCKL1 | Caffeine metabolism         | CHOL | -0.408740512 |
| UCKL1 | Cancer stem cell            | CHOL | -0.1141232   |
| UCKL1 | Cancer stem-like cell       | CHOL | 0.129343341  |
| UCKL1 | Cd4+ cytotoxic t cell       | CHOL | 0.115881943  |
| UCKL1 | Cd4+ memory t cell          | CHOL | 0.05316622   |
| UCKL1 | Cd4+ regulatory t cell      | CHOL | 0.059530228  |
| UCKL1 | Cd4+ t helper cell          | CHOL | -0.056456836 |
| UCKL1 | Cd4+cd25+ regulatory t c    | CHOL | -0.047531201 |
| UCKL1 | Cd8+ cytotoxic t cell       | CHOL | 0.026026453  |
| UCKL1 | Cd8+ regulatory t cell      | CHOL | 0.098216566  |
| UCKL1 | Cell_cycle                  | CHOL | 0.124002855  |
| UCKL1 | Chandran_metastasis_top5    | CHOL | -0.197865614 |
| UCKL1 | Citrate cycle (tca cycle)   | CHOL | -0.220477116 |
| UCKL1 | Cysteine and methionine r   | CHOL | -0.282202458 |
| UCKL1 | Cytokine induced killer c   | CHOL | -0.027220495 |
| UCKL1 | D-arginine and d-ornithin   | CHOL | -0.28382853  |
| UCKL1 | D-glutamine and d-glutan    | CHOL | -0.364790243 |
| UCKL1 | Dendritic cell              | CHOL | -0.048125127 |
| UCKL1 | Dna_repair                  | CHOL | 0.364385365  |
| UCKL1 | Dna_replication             | CHOL | 0.058850994  |
| UCKL1 | Double-negative memory      | CHOL | 0.119902053  |
| UCKL1 | Drug metabolism - cytoch    | CHOL | -0.377986056 |
| UCKL1 | Drug metabolism - other c   | CHOL | -0.25908089  |
| UCKL1 | E2f_targets                 | CHOL | 0.08713602   |
| UCKL1 | Ecm_receptor_interaction    | CHOL | -0.207821649 |
| UCKL1 | Effector cd4+ memory t (    | CHOL | -0.040448463 |
| UCKL1 | Effector cd8+ memory t (    | CHOL | 0.11975941   |
| UCKL1 | Effector memory t cell      | CHOL | 0.013915209  |
| UCKL1 | Effector regulatory t (treg | CHOL | 0.005949423  |
| UCKL1 | Elvidge_hif1a_targets_up    | CHOL | -0.100603827 |
| UCKL1 | Endothelial cell            | CHOL | -0.130262615 |
| UCKL1 | Eosinophil                  | CHOL | 0.044956911  |
| UCKL1 | Ether lipid metabolism      | CHOL | -0.29015223  |
| UCKL1 | Exhausted cd4+ t cell       | CHOL | -0.18392234  |
| UCKL1 | Exhausted cd8+ t cell       | CHOL | -0.034495896 |
| UCKL1 | Exhausted t cell            | CHOL | 0.029131419  |
| UCKL1 | Fat cell (adipocyte)        | CHOL | -0.394038818 |

|       |                              |      |              |
|-------|------------------------------|------|--------------|
| UCKL1 | Fatty acid biosynthesis      | CHOL | -0.209307983 |
| UCKL1 | Fatty acid degradation       | CHOL | -0.266373739 |
| UCKL1 | Fatty acid elongation        | CHOL | -0.349935477 |
| UCKL1 | Fibroblast                   | CHOL | -0.127433732 |
| UCKL1 | Folate biosynthesis          | CHOL | -0.171849019 |
| UCKL1 | Follicular b cell            | CHOL | 0.012054623  |
| UCKL1 | Follicular dendritic cell    | CHOL | 0.008587397  |
| UCKL1 | Follicular helper (tfh) t ce | CHOL | -0.051401857 |
| UCKL1 | Follicular t cell            | CHOL | -0.046243667 |
| UCKL1 | Foxp3+il-17+ t cell          | CHOL | 0.146801334  |
| UCKL1 | Fructose and mannose me      | CHOL | -0.212942504 |
| UCKL1 | G2m_checkpoint               | CHOL | 0.056624716  |
| UCKL1 | Galactose metabolism         | CHOL | -0.150007803 |
| UCKL1 | Galie_tumor_stemness_ge      | CHOL | 0.045958976  |
| UCKL1 | Glutathione metabolism       | CHOL | -0.101607086 |
| UCKL1 | Glycerolipid metabolism      | CHOL | -0.128120176 |
| UCKL1 | Glycerophospholipid metæ     | CHOL | 0.044731878  |
| UCKL1 | Glycine, serine and threor   | CHOL | -0.317620829 |
| UCKL1 | Glycolysis / gluconeogene    | CHOL | -0.189576353 |
| UCKL1 | Glycosaminoglycan biosy1     | CHOL | -0.019931977 |
| UCKL1 | Glycosaminoglycan biosy1     | CHOL | -0.026896325 |
| UCKL1 | Glycosaminoglycan biosy1     | CHOL | 0.187400856  |
| UCKL1 | Glycosaminoglycan degra      | CHOL | -0.319523752 |
| UCKL1 | Glycosphingolipid biosyn1    | CHOL | -0.170834726 |
| UCKL1 | Glycosphingolipid biosyn1    | CHOL | 0.120216979  |
| UCKL1 | Glycosphingolipid biosyn1    | CHOL | 0.134668758  |
| UCKL1 | Glycosylphosphatidylinos:    | CHOL | 0.172765648  |
| UCKL1 | Glyoxylate and dicarboxy     | CHOL | -0.143422396 |
| UCKL1 | Granulocyte                  | CHOL | 0.031015144  |
| UCKL1 | Hedgehog_signaling           | CHOL | -0.249072726 |
| UCKL1 | Histidine metabolism         | CHOL | -0.202260915 |
| UCKL1 | Hypoxia                      | CHOL | -0.251262842 |
| UCKL1 | Il-17ralpha t cell           | CHOL | -0.080773552 |
| UCKL1 | Il2_stat5_signaling          | CHOL | -0.055491487 |
| UCKL1 | Il6_jak_stat3_signaling      | CHOL | -0.117490758 |
| UCKL1 | Immune_checkpoints_tun:      | CHOL | 0.022906076  |
| UCKL1 | Immune_inhibition_cytok      | CHOL | 0.012356353  |
| UCKL1 | Inositol phosphate metabo    | CHOL | -0.11891902  |
| UCKL1 | Interleukin_6_signaling      | CHOL | -0.39398016  |
| UCKL1 | Jaeger_metastasis_up         | CHOL | -0.243455273 |
| UCKL1 | Jain_nfkb_signaling          | CHOL | 0.076741146  |
| UCKL1 | Kras_signaling_up            | CHOL | -0.206383079 |
| UCKL1 | Linoleic acid metabolism     | CHOL | -0.318992596 |

|       |                             |      |              |
|-------|-----------------------------|------|--------------|
| UCKL1 | Lipoic acid metabolism      | CHOL | 0.055852777  |
| UCKL1 | Lysine degradation          | CHOL | -0.328722959 |
| UCKL1 | Lysosome                    | CHOL | -0.227537437 |
| UCKL1 | M1 macrophage               | CHOL | -0.030583173 |
| UCKL1 | M2 macrophage               | CHOL | -0.179350094 |
| UCKL1 | Mannose type o-glycan bi    | CHOL | 0.281741869  |
| UCKL1 | Mapk_signaling_pathway      | CHOL | -0.297132125 |
| UCKL1 | Mapk3_erk1_activation       | CHOL | -0.490213232 |
| UCKL1 | Marginal zone b cell        | CHOL | 0.139874121  |
| UCKL1 | Memory b cell               | CHOL | 0.201789848  |
| UCKL1 | Mesenchymal cell            | CHOL | 0.06418623   |
| UCKL1 | Mesenchymal stem cell       | CHOL | -0.14739189  |
| UCKL1 | Metabolism of xenobiotic    | CHOL | -0.3921293   |
| UCKL1 | Migrating cancer stem cel   | CHOL | 0.097453337  |
| UCKL1 | Mitotic_spindle             | CHOL | -0.191019235 |
| UCKL1 | Monocyte                    | CHOL | -0.051154434 |
| UCKL1 | Mtor_signaling_pathway      | CHOL | -0.482255749 |
| UCKL1 | Mtorc1_signaling            | CHOL | -0.261888917 |
| UCKL1 | Mucin type o-glycan biosy   | CHOL | -0.189734374 |
| UCKL1 | Myc_targets_v1              | CHOL | 0.263830203  |
| UCKL1 | Myeloid cell                | CHOL | -0.060085675 |
| UCKL1 | N-glycan biosynthesis       | CHOL | -0.156431038 |
| UCKL1 | Naive b cell                | CHOL | 0.107032623  |
| UCKL1 | Naive cd4+ t cell           | CHOL | -0.004961289 |
| UCKL1 | Naive cd8+ t cell           | CHOL | 0.131106078  |
| UCKL1 | Natural killer cell         | CHOL | 0.035726269  |
| UCKL1 | Natural killer t (nkt) cell | CHOL | 0.190837108  |
| UCKL1 | Natural regulatory t (treg) | CHOL | 0.012438649  |
| UCKL1 | Neomycin, kanamycin and     | CHOL | -0.164884939 |
| UCKL1 | Neutrophil                  | CHOL | -0.168193852 |
| UCKL1 | Nicotinate and nicotinami   | CHOL | -0.47112038  |
| UCKL1 | Nitrogen metabolism         | CHOL | -0.007363157 |
| UCKL1 | Nod_like_receptor_signal    | CHOL | -0.060759929 |
| UCKL1 | Notch_signaling             | CHOL | 0.023896516  |
| UCKL1 | One carbon pool by folate   | CHOL | -0.115086595 |
| UCKL1 | Other glycan degradation    | CHOL | -0.060775219 |
| UCKL1 | Other types of o-glycan b   | CHOL | 0.315391113  |
| UCKL1 | Oxidative phosphorylatior   | CHOL | 0.047951412  |
| UCKL1 | P53_pathway                 | CHOL | -0.18410286  |
| UCKL1 | P53_signaling_pathway       | CHOL | -0.257176754 |
| UCKL1 | Pantothenate and coa bios   | CHOL | -0.433393834 |
| UCKL1 | Pentose and glucuronate i   | CHOL | -0.467373446 |
| UCKL1 | Pentose phosphate pathwa    | CHOL | -0.16531674  |

|       |                            |      |              |
|-------|----------------------------|------|--------------|
| UCKL1 | Pericyte                   | CHOL | -0.053467016 |
| UCKL1 | Phenylalanine metabolism   | CHOL | -0.236917508 |
| UCKL1 | Phenylalanine, tyrosine ar | CHOL | -0.172824343 |
| UCKL1 | Phosphonate and phosphir   | CHOL | -0.264629506 |
| UCKL1 | Pi3k_akt_activation        | CHOL | -0.42724837  |
| UCKL1 | Pi3k_akt_mtor_signaling    | CHOL | -0.178316636 |
| UCKL1 | Porphyrin and chlorophyl   | CHOL | -0.334179829 |
| UCKL1 | Primary bile acid biosynt  | CHOL | -0.449718089 |
| UCKL1 | Propanoate metabolism      | CHOL | -0.357562831 |
| UCKL1 | Purine metabolism          | CHOL | 0.178937633  |
| UCKL1 | Pyrimidine metabolism      | CHOL | 0.297717491  |
| UCKL1 | Pyruvate metabolism        | CHOL | -0.231127156 |
| UCKL1 | Regulation_of_autophagy    | CHOL | -0.133931167 |
| UCKL1 | Retinol metabolism         | CHOL | -0.449226505 |
| UCKL1 | Riboflavin metabolism      | CHOL | -0.219490384 |
| UCKL1 | Schmahl_pdgf_signaling     | CHOL | -0.341619276 |
| UCKL1 | Selenocompound metabol     | CHOL | -0.220834343 |
| UCKL1 | Signaling_by_hippo         | CHOL | -0.019548074 |
| UCKL1 | Sphingolipid metabolism    | CHOL | -0.341898646 |
| UCKL1 | Starch and sucrose metabo  | CHOL | -0.526246828 |
| UCKL1 | Steroid biosynthesis       | CHOL | 0.088553689  |
| UCKL1 | Steroid hormone biosynth   | CHOL | -0.455675591 |
| UCKL1 | Sulfur metabolism          | CHOL | 0.008663008  |
| UCKL1 | Synthesis and degradation  | CHOL | -0.41469956  |
| UCKL1 | T helper cell              | CHOL | -0.007015187 |
| UCKL1 | T helper1 (th1) cell       | CHOL | 0.095377074  |
| UCKL1 | T helper17 (th17) cell     | CHOL | 0.107062774  |
| UCKL1 | T helper2 (th2) cell       | CHOL | -0.020629674 |
| UCKL1 | T helper9 (th9) cell       | CHOL | 0.022917021  |
| UCKL1 | Taurine and hypotaurine r  | CHOL | 0.254611636  |
| UCKL1 | Terpenoid backbone biosy   | CHOL | -0.262664715 |
| UCKL1 | Tgf_beta_signaling_pathw   | CHOL | -0.118739634 |
| UCKL1 | Thiamine metabolism        | CHOL | -0.182875068 |
| UCKL1 | Tnfa_signaling_via_nfkb    | CHOL | -0.0768864   |
| UCKL1 | Tryptophan metabolism      | CHOL | -0.29642525  |
| UCKL1 | Tumor endothelial cell     | CHOL | 0.00946006   |
| UCKL1 | Tyrosine metabolism        | CHOL | -0.315651762 |
| UCKL1 | Ubiquinone and other ter   | CHOL | -0.172500963 |
| UCKL1 | Valine, leucine and isoleu | CHOL | -0.306957225 |
| UCKL1 | Valine, leucine and isoleu | CHOL | -0.320971555 |
| UCKL1 | Vascular endothelial cell  | CHOL | -0.221818335 |
| UCKL1 | Vascular smooth muscle c   | CHOL | -0.032037439 |
| UCKL1 | Vegf_signaling_pathway     | CHOL | -0.086733881 |

|       |                                      |      |              |
|-------|--------------------------------------|------|--------------|
| UCKL1 | Vitamin b6 metabolism                | CHOL | -0.252009801 |
| UCKL1 | Willert_wnt_signaling                | CHOL | 0.319730515  |
| UCKL1 | Wnt_beta_catenin_signali             | CHOL | 0.297884765  |
| UPP1  | Abnormal plasma cell                 | CHOL | -0.087500267 |
| UPP1  | Activated b cell                     | CHOL | 0.304626147  |
| UPP1  | Activated cd4+ t cell                | CHOL | 0.309427734  |
| UPP1  | Activated t cell                     | CHOL | 0.254352649  |
| UPP1  | Alanine, aspartate and glu           | CHOL | 0.071585904  |
| UPP1  | Alcala_apoptosis                     | CHOL | 0.559712965  |
| UPP1  | Alpha-linolenic acid meta            | CHOL | -0.283153534 |
| UPP1  | Amino sugar and nucleoti             | CHOL | 0.417899236  |
| UPP1  | Ampk_pathway                         | CHOL | 0.059584649  |
| UPP1  | Angiogenesis                         | CHOL | -0.070550753 |
| UPP1  | Arachidonic acid metabol:            | CHOL | 0.314560238  |
| UPP1  | Arginine and proline metæ            | CHOL | -0.089364238 |
| UPP1  | Arginine biosynthesis                | CHOL | -0.079095689 |
| UPP1  | Ascorbate and aldarate mε            | CHOL | -0.145860782 |
| UPP1  | Atypical memory b cell               | CHOL | 0.088684674  |
| UPP1  | Axl+siglecc6+ dendritic ce           | CHOL | 0.364887522  |
| UPP1  | B cell                               | CHOL | 0.329719917  |
| UPP1  | B1 cell                              | CHOL | 0.230172516  |
| UPP1  | Basal cell                           | CHOL | 0.003257909  |
| UPP1  | Beta-alanine metabolism              | CHOL | -0.005247955 |
| UPP1  | Biosynthesis of unsaturate           | CHOL | 0.138554405  |
| UPP1  | Biotin metabolism                    | CHOL | -0.208467473 |
| UPP1  | Butanoate metabolism                 | CHOL | 0.060175082  |
| UPP1  | Caffeine metabolism                  | CHOL | -0.189902439 |
| UPP1  | Cancer stem cell                     | CHOL | -0.033765837 |
| UPP1  | Cancer stem-like cell                | CHOL | 0.02858964   |
| UPP1  | Cd4+ cytotoxic t cell                | CHOL | 0.313396084  |
| UPP1  | Cd4+ memory t cell                   | CHOL | 0.202178001  |
| UPP1  | Cd4+ regulatory t cell               | CHOL | 0.3304091    |
| UPP1  | Cd4+ t helper cell                   | CHOL | 0.189054719  |
| UPP1  | Cd4+cd25+ regulatory t c             | CHOL | 0.195172154  |
| UPP1  | Cd8+ cytotoxic t cell                | CHOL | 0.17147218   |
| UPP1  | Cd8+ regulatory t cell               | CHOL | 0.305147638  |
| UPP1  | Cell_cycle                           | CHOL | 0.01858068   |
| UPP1  | Chandran_metastasis_top <sup>5</sup> | CHOL | -0.294399284 |
| UPP1  | Citrate cycle (tca cycle)            | CHOL | 0.301733123  |
| UPP1  | Cysteine and methionine r            | CHOL | 0.026619649  |
| UPP1  | Cytokine induced killer cε           | CHOL | 0.053637708  |
| UPP1  | D-arginine and d-ornithin            | CHOL | -0.146742751 |
| UPP1  | D-glutamine and d-glutan             | CHOL | -0.217757848 |

|      |                              |      |              |
|------|------------------------------|------|--------------|
| UPP1 | Dendritic cell               | CHOL | 0.379805792  |
| UPP1 | Dna_repair                   | CHOL | 0.469043587  |
| UPP1 | Dna_replication              | CHOL | 0.378056946  |
| UPP1 | Double-negative memory       | CHOL | 0.22316877   |
| UPP1 | Drug metabolism - cytoch     | CHOL | -0.092369564 |
| UPP1 | Drug metabolism - other      | CHOL | 0.189656389  |
| UPP1 | E2f_targets                  | CHOL | 0.107249135  |
| UPP1 | Ecm_receptor_interaction     | CHOL | -0.084125884 |
| UPP1 | Effector cd4+ memory t       | CHOL | 0.228063089  |
| UPP1 | Effector cd8+ memory t       | CHOL | 0.373161576  |
| UPP1 | Effector memory t cell       | CHOL | 0.232742426  |
| UPP1 | Effector regulatory t (treg  | CHOL | 0.280234372  |
| UPP1 | Elvidge_hif1a_targets_up     | CHOL | -0.06454149  |
| UPP1 | Endothelial cell             | CHOL | 0.087851381  |
| UPP1 | Eosinophil                   | CHOL | 0.385122838  |
| UPP1 | Ether lipid metabolism       | CHOL | 0.189842927  |
| UPP1 | Exhausted cd4+ t cell        | CHOL | 0.297791582  |
| UPP1 | Exhausted cd8+ t cell        | CHOL | 0.279662998  |
| UPP1 | Exhausted t cell             | CHOL | 0.28786695   |
| UPP1 | Fat cell (adipocyte)         | CHOL | 0.265524068  |
| UPP1 | Fatty acid biosynthesis      | CHOL | 0.108868326  |
| UPP1 | Fatty acid degradation       | CHOL | -0.144046798 |
| UPP1 | Fatty acid elongation        | CHOL | 0.269716021  |
| UPP1 | Fibroblast                   | CHOL | 0.09840047   |
| UPP1 | Folate biosynthesis          | CHOL | -0.083921484 |
| UPP1 | Follicular b cell            | CHOL | 0.28390021   |
| UPP1 | Follicular dendritic cell    | CHOL | 0.199768694  |
| UPP1 | Follicular helper (tfh) t ce | CHOL | 0.162142325  |
| UPP1 | Follicular t cell            | CHOL | 0.263380732  |
| UPP1 | Foxp3+il-17+ t cell          | CHOL | 0.304439769  |
| UPP1 | Fructose and mannose me      | CHOL | 0.353760186  |
| UPP1 | G2m_checkpoint               | CHOL | -0.065914829 |
| UPP1 | Galactose metabolism         | CHOL | 0.47519454   |
| UPP1 | Galie_tumor_stemness_ge      | CHOL | -0.08947359  |
| UPP1 | Glutathione metabolism       | CHOL | 0.36792444   |
| UPP1 | Glycerolipid metabolism      | CHOL | -0.075246271 |
| UPP1 | Glycerophospholipid metæ     | CHOL | 0.268036651  |
| UPP1 | Glycine, serine and threor   | CHOL | 0.086989884  |
| UPP1 | Glycolysis / gluconeogene    | CHOL | 0.294380748  |
| UPP1 | Glycosaminoglycan biosy1     | CHOL | 0.409038652  |
| UPP1 | Glycosaminoglycan biosy1     | CHOL | 0.176615013  |
| UPP1 | Glycosaminoglycan biosy1     | CHOL | 0.142014051  |
| UPP1 | Glycosaminoglycan degra      | CHOL | 0.526084445  |



|      |                           |      |              |
|------|---------------------------|------|--------------|
| UPP1 | Glycosphingolipid biosyn  | CHOL | 0.66869398   |
| UPP1 | Glycosphingolipid biosyn  | CHOL | 0.316624628  |
| UPP1 | Glycosphingolipid biosyn  | CHOL | -0.025373977 |
| UPP1 | Glycosylphosphatidylinos  | CHOL | -0.144477097 |
| UPP1 | Glyoxylate and dicarboxy  | CHOL | 0.029850222  |
| UPP1 | Granulocyte               | CHOL | 0.367938837  |
| UPP1 | Hedgehog_signaling        | CHOL | -0.164415777 |
| UPP1 | Histidine metabolism      | CHOL | -0.270936491 |
| UPP1 | Hypoxia                   | CHOL | 0.237926854  |
| UPP1 | Il-17alpha t cell         | CHOL | 0.095033098  |
| UPP1 | Il2_stat5_signaling       | CHOL | 0.297808474  |
| UPP1 | Il6_jak_stat3_signaling   | CHOL | 0.185330033  |
| UPP1 | Immune_checkpoints_tun    | CHOL | 0.248208649  |
| UPP1 | Immune_inhibition_cytok   | CHOL | 0.235460265  |
| UPP1 | Inositol phosphate metabo | CHOL | -0.450562112 |
| UPP1 | Interleukin_6_signaling   | CHOL | -0.121465327 |
| UPP1 | Jaeger_metastasis_up      | CHOL | 0.329126233  |
| UPP1 | Jain_nfkb_signaling       | CHOL | -0.008751678 |
| UPP1 | Kras_signaling_up         | CHOL | 0.088316876  |
| UPP1 | Linoleic acid metabolism  | CHOL | -0.396704717 |
| UPP1 | Lipoic acid metabolism    | CHOL | 0.207378164  |
| UPP1 | Lysine degradation        | CHOL | -0.30782702  |
| UPP1 | Lysosome                  | CHOL | 0.462413672  |
| UPP1 | M1 macrophage             | CHOL | 0.387769924  |
| UPP1 | M2 macrophage             | CHOL | 0.404221455  |
| UPP1 | Mannose type o-glycan bi  | CHOL | -0.087424093 |
| UPP1 | Mapk_signaling_pathway    | CHOL | -0.007784585 |
| UPP1 | Mapk3_erk1_activation     | CHOL | -0.0075141   |
| UPP1 | Marginal zone b cell      | CHOL | 0.164775418  |
| UPP1 | Memory b cell             | CHOL | 0.202862658  |
| UPP1 | Mesenchymal cell          | CHOL | 0.193876422  |
| UPP1 | Mesenchymal stem cell     | CHOL | 0.102415133  |
| UPP1 | Metabolism of xenobiotic  | CHOL | 0.0870877    |
| UPP1 | Migrating cancer stem cel | CHOL | -0.176748704 |
| UPP1 | Mitotic_spindle           | CHOL | -0.385134944 |
| UPP1 | Monocyte                  | CHOL | 0.399252773  |
| UPP1 | Mtor_signaling_pathway    | CHOL | 0.080661315  |
| UPP1 | Mtorc1_signaling          | CHOL | 0.427998114  |
| UPP1 | Mucin type o-glycan biosy | CHOL | 0.143428005  |
| UPP1 | Myc_targets_v1            | CHOL | 0.385539832  |
| UPP1 | Myeloid cell              | CHOL | 0.351748862  |
| UPP1 | N-glycan biosynthesis     | CHOL | 0.046550612  |
| UPP1 | Naive b cell              | CHOL | 0.174071276  |

|      |                             |      |              |
|------|-----------------------------|------|--------------|
| UPP1 | Naive cd4+ t cell           | CHOL | 0.185687709  |
| UPP1 | Naive cd8+ t cell           | CHOL | 0.141845246  |
| UPP1 | Natural killer cell         | CHOL | 0.316693607  |
| UPP1 | Natural killer t (nkt) cell | CHOL | 0.414702763  |
| UPP1 | Natural regulatory t (treg) | CHOL | 0.210792704  |
| UPP1 | Neomycin, kanamycin and     | CHOL | 0.113081081  |
| UPP1 | Neutrophil                  | CHOL | 0.255696456  |
| UPP1 | Nicotinate and nicotinami   | CHOL | 0.214846429  |
| UPP1 | Nitrogen metabolism         | CHOL | -0.420651503 |
| UPP1 | Nod_like_receptor_signal    | CHOL | 0.268348653  |
| UPP1 | Notch_signaling             | CHOL | -0.349289221 |
| UPP1 | One carbon pool by folate   | CHOL | 0.120359022  |
| UPP1 | Other glycan degradation    | CHOL | 0.073333725  |
| UPP1 | Other types of o-glycan b   | CHOL | 0.072168016  |
| UPP1 | Oxidative phosphorylatio    | CHOL | 0.422963508  |
| UPP1 | P53_pathway                 | CHOL | 0.465469345  |
| UPP1 | P53_signaling_pathway       | CHOL | 0.036911015  |
| UPP1 | Pantothenate and coa bios   | CHOL | 0.1987343    |
| UPP1 | Pentose and glucuronate i   | CHOL | -0.018179772 |
| UPP1 | Pentose phosphate pathwa    | CHOL | 0.575970846  |
| UPP1 | Pericyte                    | CHOL | -0.022042099 |
| UPP1 | Phenylalanine metabolism    | CHOL | 0.131304646  |
| UPP1 | Phenylalanine, tyrosine ar  | CHOL | 0.122847778  |
| UPP1 | Phosphonate and phosphir    | CHOL | 0.226427532  |
| UPP1 | Pi3k_akt_activation         | CHOL | -0.138008342 |
| UPP1 | Pi3k_akt_mtor_signaling     | CHOL | 0.444314462  |
| UPP1 | Porphyrin and chlorophyl    | CHOL | 0.170638807  |
| UPP1 | Primary bile acid biosynt   | CHOL | 0.012738882  |
| UPP1 | Propanoate metabolism       | CHOL | 0.063799153  |
| UPP1 | Purine metabolism           | CHOL | 0.148552192  |
| UPP1 | Pyrimidine metabolism       | CHOL | 0.257032281  |
| UPP1 | Pyruvate metabolism         | CHOL | 0.094440427  |
| UPP1 | Regulation_of_autophagy     | CHOL | 0.231897885  |
| UPP1 | Retinol metabolism          | CHOL | -0.117950515 |
| UPP1 | Riboflavin metabolism       | CHOL | 0.147139746  |
| UPP1 | Schmahl_pdgf_signaling      | CHOL | -0.207104014 |
| UPP1 | Selenocompound metabol      | CHOL | -0.238852658 |
| UPP1 | Signaling_by_hippo          | CHOL | -0.507728028 |
| UPP1 | Sphingolipid metabolism     | CHOL | -0.047931001 |
| UPP1 | Starch and sucrose metab    | CHOL | 0.255752563  |
| UPP1 | Steroid biosynthesis        | CHOL | -0.080240775 |
| UPP1 | Steroid hormone biosynth    | CHOL | -0.135021837 |
| UPP1 | Sulfur metabolism           | CHOL | -0.273792841 |

|      |                            |      |              |
|------|----------------------------|------|--------------|
| UPP1 | Synthesis and degradation  | CHOL | 0.034017012  |
| UPP1 | T helper cell              | CHOL | 0.250176179  |
| UPP1 | T helper1 (th1) cell       | CHOL | 0.274971782  |
| UPP1 | T helper17 (th17) cell     | CHOL | 0.112990157  |
| UPP1 | T helper2 (th2) cell       | CHOL | 0.255277295  |
| UPP1 | T helper9 (th9) cell       | CHOL | 0.209576467  |
| UPP1 | Taurine and hypotaurine r  | CHOL | -0.205171195 |
| UPP1 | Terpenoid backbone biosy   | CHOL | 0.081571533  |
| UPP1 | Tgf_beta_signaling_pathw   | CHOL | -0.332122076 |
| UPP1 | Thiamine metabolism        | CHOL | 0.138486294  |
| UPP1 | Tnfa_signaling_via_nfkb    | CHOL | 0.141811542  |
| UPP1 | Tryptophan metabolism      | CHOL | 0.030090461  |
| UPP1 | Tumor endothelial cell     | CHOL | 0.145050113  |
| UPP1 | Tyrosine metabolism        | CHOL | -0.020248907 |
| UPP1 | Ubiquinone and other ter   | CHOL | 0.066741046  |
| UPP1 | Valine, leucine and isoleu | CHOL | 0.542278578  |
| UPP1 | Valine, leucine and isoleu | CHOL | -0.011595941 |
| UPP1 | Vascular endothelial cell  | CHOL | 0.126193439  |
| UPP1 | Vascular smooth muscle c   | CHOL | -0.052142158 |
| UPP1 | Vegf_signaling_pathway     | CHOL | 0.265824806  |
| UPP1 | Vitamin b6 metabolism      | CHOL | 0.178620809  |
| UPP1 | Willert_wnt_signaling      | CHOL | -0.347332242 |
| UPP1 | Wnt_beta_catenin_signali   | CHOL | -0.475029868 |
| UPP2 | Abnormal plasma cell       | CHOL | -0.152512005 |
| UPP2 | Activated b cell           | CHOL | -0.290072827 |
| UPP2 | Activated cd4+ t cell      | CHOL | -0.138222969 |
| UPP2 | Activated t cell           | CHOL | -0.257930976 |
| UPP2 | Alanine, aspartate and glu | CHOL | 0.562579996  |
| UPP2 | Alcala_apoptosis           | CHOL | -0.158953593 |
| UPP2 | Alpha-linolenic acid meta  | CHOL | 0.503175063  |
| UPP2 | Amino sugar and nucleoti   | CHOL | 0.278849354  |
| UPP2 | Ampk_pathway               | CHOL | 0.136435679  |
| UPP2 | Angiogenesis               | CHOL | -0.054294199 |
| UPP2 | Arachidonic acid metabol   | CHOL | 0.190017942  |
| UPP2 | Arginine and proline metæ  | CHOL | 0.573404249  |
| UPP2 | Arginine biosynthesis      | CHOL | 0.626603418  |
| UPP2 | Ascorbate and aldarate mε  | CHOL | 0.47530151   |
| UPP2 | Atypical memory b cell     | CHOL | -0.096501437 |
| UPP2 | Axl+siglec6+ dendritic ce  | CHOL | -0.271948959 |
| UPP2 | B cell                     | CHOL | -0.266260201 |
| UPP2 | B1 cell                    | CHOL | -0.282230393 |
| UPP2 | Basal cell                 | CHOL | -0.226191089 |
| UPP2 | Beta-alanine metabolism    | CHOL | 0.590247084  |

|      |                             |      |              |
|------|-----------------------------|------|--------------|
| UPP2 | Biosynthesis of unsaturate  | CHOL | 0.478862246  |
| UPP2 | Biotin metabolism           | CHOL | -0.128690246 |
| UPP2 | Butanoate metabolism        | CHOL | 0.616239936  |
| UPP2 | Caffeine metabolism         | CHOL | 0.330024799  |
| UPP2 | Cancer stem cell            | CHOL | -0.07924335  |
| UPP2 | Cancer stem-like cell       | CHOL | -0.05558025  |
| UPP2 | Cd4+ cytotoxic t cell       | CHOL | -0.308375665 |
| UPP2 | Cd4+ memory t cell          | CHOL | -0.249322906 |
| UPP2 | Cd4+ regulatory t cell      | CHOL | -0.241208792 |
| UPP2 | Cd4+ t helper cell          | CHOL | -0.217145714 |
| UPP2 | Cd4+cd25+ regulatory t c    | CHOL | -0.228974516 |
| UPP2 | Cd8+ cytotoxic t cell       | CHOL | -0.151502793 |
| UPP2 | Cd8+ regulatory t cell      | CHOL | -0.226163097 |
| UPP2 | Cell_cycle                  | CHOL | 0.037685146  |
| UPP2 | Chandran_metastasis_top5    | CHOL | 0.165394197  |
| UPP2 | Citrate cycle (tca cycle)   | CHOL | 0.293872209  |
| UPP2 | Cysteine and methionine r   | CHOL | 0.532006477  |
| UPP2 | Cytokine induced killer cε  | CHOL | -0.26671005  |
| UPP2 | D-arginine and d-ornithin   | CHOL | 0.571917332  |
| UPP2 | D-glutamine and d-glutan    | CHOL | 0.26168636   |
| UPP2 | Dendritic cell              | CHOL | -0.140309747 |
| UPP2 | Dna_repair                  | CHOL | 0.015706857  |
| UPP2 | Dna_replication             | CHOL | 0.065088404  |
| UPP2 | Double-negative memory      | CHOL | -0.248654439 |
| UPP2 | Drug metabolism - cytoch    | CHOL | 0.527045005  |
| UPP2 | Drug metabolism - other (   | CHOL | 0.466204776  |
| UPP2 | E2f_targets                 | CHOL | 0.191876382  |
| UPP2 | Ecm_receptor_interaction    | CHOL | -0.107851829 |
| UPP2 | Effector cd4+ memory t (    | CHOL | -0.188988867 |
| UPP2 | Effector cd8+ memory t (    | CHOL | -0.412237796 |
| UPP2 | Effector memory t cell      | CHOL | -0.213569493 |
| UPP2 | Effector regulatory t (treg | CHOL | -0.266138496 |
| UPP2 | Elvidge_hif1a_targets_up    | CHOL | 0.091850714  |
| UPP2 | Endothelial cell            | CHOL | -0.145970649 |
| UPP2 | Eosinophil                  | CHOL | -0.220407029 |
| UPP2 | Ether lipid metabolism      | CHOL | 0.144455524  |
| UPP2 | Exhausted cd4+ t cell       | CHOL | -0.238879399 |
| UPP2 | Exhausted cd8+ t cell       | CHOL | -0.328557909 |
| UPP2 | Exhausted t cell            | CHOL | -0.214948534 |
| UPP2 | Fat cell (adipocyte)        | CHOL | 0.554188735  |
| UPP2 | Fatty acid biosynthesis     | CHOL | 0.285351883  |
| UPP2 | Fatty acid degradation      | CHOL | 0.574624094  |
| UPP2 | Fatty acid elongation       | CHOL | 0.384762539  |

|      |                              |      |              |
|------|------------------------------|------|--------------|
| UPP2 | Fibroblast                   | CHOL | -0.228547202 |
| UPP2 | Folate biosynthesis          | CHOL | 0.428553288  |
| UPP2 | Follicular b cell            | CHOL | -0.229468713 |
| UPP2 | Follicular dendritic cell    | CHOL | -0.193107571 |
| UPP2 | Follicular helper (tfh) t ce | CHOL | -0.119963883 |
| UPP2 | Follicular t cell            | CHOL | -0.126754737 |
| UPP2 | Foxp3+il-17+ t cell          | CHOL | -0.100222174 |
| UPP2 | Fructose and mannose me      | CHOL | 0.417297646  |
| UPP2 | G2m_checkpoint               | CHOL | 0.120921997  |
| UPP2 | Galactose metabolism         | CHOL | 0.094632468  |
| UPP2 | Galie_tumor_stemness_ge      | CHOL | -0.238715324 |
| UPP2 | Glutathione metabolism       | CHOL | 0.334234028  |
| UPP2 | Glycerolipid metabolism      | CHOL | 0.424412248  |
| UPP2 | Glycerophospholipid metæ     | CHOL | 0.38394879   |
| UPP2 | Glycine, serine and threor   | CHOL | 0.607553751  |
| UPP2 | Glycolysis / gluconeogene    | CHOL | 0.380578435  |
| UPP2 | Glycosaminoglycan biosy1     | CHOL | -0.253224139 |
| UPP2 | Glycosaminoglycan biosy1     | CHOL | -0.264730096 |
| UPP2 | Glycosaminoglycan biosy1     | CHOL | -0.105261153 |
| UPP2 | Glycosaminoglycan degra      | CHOL | 0.057095716  |
| UPP2 | Glycosphingolipid biosyn1    | CHOL | -0.099149849 |
| UPP2 | Glycosphingolipid biosyn1    | CHOL | -0.11493393  |
| UPP2 | Glycosphingolipid biosyn1    | CHOL | 0.166828771  |
| UPP2 | Glycosylphosphatidylinos:    | CHOL | 0.099334554  |
| UPP2 | Glyoxylate and dicarboxy     | CHOL | 0.375339349  |
| UPP2 | Granulocyte                  | CHOL | -0.239816181 |
| UPP2 | Hedgehog_signaling           | CHOL | -0.232903755 |
| UPP2 | Histidine metabolism         | CHOL | 0.430553925  |
| UPP2 | Hypoxia                      | CHOL | -0.051754118 |
| UPP2 | Il-17ralpha t cell           | CHOL | -0.226757325 |
| UPP2 | Il2_stat5_signaling          | CHOL | -0.134279334 |
| UPP2 | Il6_jak_stat3_signaling      | CHOL | -0.126586729 |
| UPP2 | Immune_checkpoints_tunr      | CHOL | -0.113402172 |
| UPP2 | Immune_inhibition_cytok      | CHOL | 0.052456885  |
| UPP2 | Inositol phosphate metabo    | CHOL | -0.18812977  |
| UPP2 | Interleukin_6_signaling      | CHOL | -0.034739568 |
| UPP2 | Jaeger_metastasis_up         | CHOL | 0.181421005  |
| UPP2 | Jain_nfkb_signaling          | CHOL | 0.070891465  |
| UPP2 | Kras_signaling_up            | CHOL | -0.128038392 |
| UPP2 | Linoleic acid metabolism     | CHOL | 0.426561574  |
| UPP2 | Lipoic acid metabolism       | CHOL | -0.027779391 |
| UPP2 | Lysine degradation           | CHOL | 0.3319636    |
| UPP2 | Lysosome                     | CHOL | 0.023185568  |

|      |                             |      |              |
|------|-----------------------------|------|--------------|
| UPP2 | M1 macrophage               | CHOL | -0.256722317 |
| UPP2 | M2 macrophage               | CHOL | 0.063429347  |
| UPP2 | Mannose type o-glycan bi    | CHOL | -0.025179136 |
| UPP2 | Mapk_signaling_pathway      | CHOL | -0.230985613 |
| UPP2 | Mapk3_erk1_activation       | CHOL | 0.144046528  |
| UPP2 | Marginal zone b cell        | CHOL | -0.274833208 |
| UPP2 | Memory b cell               | CHOL | -0.404040183 |
| UPP2 | Mesenchymal cell            | CHOL | -0.283795701 |
| UPP2 | Mesenchymal stem cell       | CHOL | -0.265559663 |
| UPP2 | Metabolism of xenobiotic    | CHOL | 0.498293905  |
| UPP2 | Migrating cancer stem cel   | CHOL | -0.225915557 |
| UPP2 | Mitotic_spindle             | CHOL | -0.181488515 |
| UPP2 | Monocyte                    | CHOL | -0.243520923 |
| UPP2 | Mtor_signaling_pathway      | CHOL | -0.0472355   |
| UPP2 | Mtorc1_signaling            | CHOL | 0.257527742  |
| UPP2 | Mucin type o-glycan biosy   | CHOL | -0.079570881 |
| UPP2 | Myc_targets_v1              | CHOL | -0.040599068 |
| UPP2 | Myeloid cell                | CHOL | -0.229983086 |
| UPP2 | N-glycan biosynthesis       | CHOL | 0.081197082  |
| UPP2 | Naive b cell                | CHOL | -0.208224018 |
| UPP2 | Naive cd4+ t cell           | CHOL | -0.408571139 |
| UPP2 | Naive cd8+ t cell           | CHOL | -0.550327534 |
| UPP2 | Natural killer cell         | CHOL | -0.222061819 |
| UPP2 | Natural killer t (nkt) cell | CHOL | -0.354736339 |
| UPP2 | Natural regulatory t (treg) | CHOL | -0.254184633 |
| UPP2 | Neomycin, kanamycin and     | CHOL | -0.287153567 |
| UPP2 | Neutrophil                  | CHOL | -0.034024993 |
| UPP2 | Nicotinate and nicotinami   | CHOL | 0.460869462  |
| UPP2 | Nitrogen metabolism         | CHOL | 0.423868433  |
| UPP2 | Nod_like_receptor_signal    | CHOL | -0.138940588 |
| UPP2 | Notch_signaling             | CHOL | -0.29226913  |
| UPP2 | One carbon pool by folate   | CHOL | 0.230399793  |
| UPP2 | Other glycan degradation    | CHOL | 0.074220914  |
| UPP2 | Other types of o-glycan b   | CHOL | 0.110583058  |
| UPP2 | Oxidative phosphorylatio    | CHOL | 0.259706799  |
| UPP2 | P53_pathway                 | CHOL | 0.064897985  |
| UPP2 | P53_signaling_pathway       | CHOL | -0.001808116 |
| UPP2 | Pantothenate and coa bios   | CHOL | 0.424129795  |
| UPP2 | Pentose and glucuronate i   | CHOL | 0.492097054  |
| UPP2 | Pentose phosphate pathwa    | CHOL | 0.095935347  |
| UPP2 | Pericyte                    | CHOL | -0.125154813 |
| UPP2 | Phenylalanine metabolism    | CHOL | 0.494970053  |
| UPP2 | Phenylalanine, tyrosine ar  | CHOL | 0.461374004  |

|      |                            |      |              |
|------|----------------------------|------|--------------|
| UPP2 | Phosphonate and phosphir   | CHOL | 0.259477015  |
| UPP2 | Pi3k_akt_activation        | CHOL | 0.036415322  |
| UPP2 | Pi3k_akt_mtor_signaling    | CHOL | 0.035767089  |
| UPP2 | Porphyrin and chlorophyl   | CHOL | 0.48008245   |
| UPP2 | Primary bile acid biosynt  | CHOL | 0.692569082  |
| UPP2 | Propanoate metabolism      | CHOL | 0.367341571  |
| UPP2 | Purine metabolism          | CHOL | -0.02272186  |
| UPP2 | Pyrimidine metabolism      | CHOL | 0.047321468  |
| UPP2 | Pyruvate metabolism        | CHOL | 0.400078504  |
| UPP2 | Regulation_of_autophagy    | CHOL | -0.024277053 |
| UPP2 | Retinol metabolism         | CHOL | 0.554474101  |
| UPP2 | Riboflavin metabolism      | CHOL | 0.319484462  |
| UPP2 | Schmahl_pdgf_signaling     | CHOL | -0.109814549 |
| UPP2 | Selenocompound metabol     | CHOL | 0.539235627  |
| UPP2 | Signaling_by_hippo         | CHOL | -0.288964294 |
| UPP2 | Sphingolipid metabolism    | CHOL | 0.012445126  |
| UPP2 | Starch and sucrose metab   | CHOL | 0.282787354  |
| UPP2 | Steroid biosynthesis       | CHOL | 0.280404316  |
| UPP2 | Steroid hormone biosynth   | CHOL | 0.43816611   |
| UPP2 | Sulfur metabolism          | CHOL | 0.332180283  |
| UPP2 | Synthesis and degradation  | CHOL | 0.597071373  |
| UPP2 | T helper cell              | CHOL | -0.145999162 |
| UPP2 | T helper1 (th1) cell       | CHOL | -0.142928098 |
| UPP2 | T helper17 (th17) cell     | CHOL | -0.187673617 |
| UPP2 | T helper2 (th2) cell       | CHOL | -0.197994689 |
| UPP2 | T helper9 (th9) cell       | CHOL | -0.240990804 |
| UPP2 | Taurine and hypotaurine r  | CHOL | 0.121092713  |
| UPP2 | Terpenoid backbone biosy   | CHOL | 0.490667524  |
| UPP2 | Tgf_beta_signaling_pathw   | CHOL | -0.156482773 |
| UPP2 | Thiamine metabolism        | CHOL | 0.417147549  |
| UPP2 | Tnfa_signaling_via_nfb     | CHOL | -0.128371715 |
| UPP2 | Tryptophan metabolism      | CHOL | 0.554711477  |
| UPP2 | Tumor endothelial cell     | CHOL | 0.261634212  |
| UPP2 | Tyrosine metabolism        | CHOL | 0.526426504  |
| UPP2 | Ubiquinone and other ter   | CHOL | 0.442841136  |
| UPP2 | Valine, leucine and isoleu | CHOL | 0.262542673  |
| UPP2 | Valine, leucine and isoleu | CHOL | 0.513863982  |
| UPP2 | Vascular endothelial cell  | CHOL | 0.003404636  |
| UPP2 | Vascular smooth muscle c   | CHOL | -0.244879557 |
| UPP2 | Vegf_signaling_pathway     | CHOL | 0.181220126  |
| UPP2 | Vitamin b6 metabolism      | CHOL | 0.422397493  |
| UPP2 | Willert_wnt_signaling      | CHOL | -0.159835043 |
| UPP2 | Wnt_beta_catenin_signali   | CHOL | -0.357490671 |

|     |                            |      |              |
|-----|----------------------------|------|--------------|
| CDA | Abnormal plasma cell       | COAD | -0.057044041 |
| CDA | Activated b cell           | COAD | -0.020598547 |
| CDA | Activated cd4+ t cell      | COAD | 0.115871201  |
| CDA | Activated t cell           | COAD | 0.039425029  |
| CDA | Alanine, aspartate and glu | COAD | -0.106447203 |
| CDA | Alcala_apoptosis           | COAD | 0.001339355  |
| CDA | Alpha-linolenic acid meta  | COAD | 0.240774025  |
| CDA | Amino sugar and nucleoti   | COAD | 0.103247456  |
| CDA | Ampk_pathway               | COAD | -0.027470306 |
| CDA | Angiogenesis               | COAD | 0.225613925  |
| CDA | Arachidonic acid metabol   | COAD | 0.332971464  |
| CDA | Arginine and proline metæ  | COAD | 0.114005698  |
| CDA | Arginine biosynthesis      | COAD | 0.079713403  |
| CDA | Ascorbate and aldarate mε  | COAD | -0.007872764 |
| CDA | Atypical memory b cell     | COAD | 0.062135449  |
| CDA | Axl+siglec6+ dendritic ce  | COAD | 0.196617842  |
| CDA | B cell                     | COAD | 0.016042733  |
| CDA | B1 cell                    | COAD | -0.087232156 |
| CDA | Basal cell                 | COAD | 0.402276506  |
| CDA | Beta-alanine metabolism    | COAD | 0.028314762  |
| CDA | Biosynthesis of unsaturate | COAD | 0.086945851  |
| CDA | Biotin metabolism          | COAD | -0.126409364 |
| CDA | Butanoate metabolism       | COAD | -0.140427354 |
| CDA | Caffeine metabolism        | COAD | 0.043483657  |
| CDA | Cancer stem cell           | COAD | 0.114327569  |
| CDA | Cancer stem-like cell      | COAD | 0.069157411  |
| CDA | Cd4+ cytotoxic t cell      | COAD | 0.143948613  |
| CDA | Cd4+ memory t cell         | COAD | 0.061869342  |
| CDA | Cd4+ regulatory t cell     | COAD | 0.07490986   |
| CDA | Cd4+ t helper cell         | COAD | 0.06060187   |
| CDA | Cd4+cd25+ regulatory t c   | COAD | 0.056359496  |
| CDA | Cd8+ cytotoxic t cell      | COAD | 0.048036634  |
| CDA | Cd8+ regulatory t cell     | COAD | 0.03019444   |
| CDA | Cell_cycle                 | COAD | -0.135060195 |
| CDA | Chandran_metastasis_top5   | COAD | -0.220784629 |
| CDA | Citrate cycle (tca cycle)  | COAD | -0.01009382  |
| CDA | Cysteine and methionine r  | COAD | -0.057030321 |
| CDA | Cytokine induced killer cε | COAD | -0.009159667 |
| CDA | D-arginine and d-ornithin  | COAD | 0.180024827  |
| CDA | D-glutamine and d-glutan   | COAD | -0.035877243 |
| CDA | Dendritic cell             | COAD | 0.155035926  |
| CDA | Dna_repair                 | COAD | -0.053747    |
| CDA | Dna_replication            | COAD | -0.133943257 |



|     |                                   |              |
|-----|-----------------------------------|--------------|
| CDA | Double-negative memory COAD       | 0.068138262  |
| CDA | Drug metabolism - cytoch COAD     | 0.19993203   |
| CDA | Drug metabolism - other ( COAD    | 0.161495896  |
| CDA | E2f_targets COAD                  | -0.181389852 |
| CDA | Ecm_receptor_interaction COAD     | 0.158183214  |
| CDA | Effector cd4+ memory t ( COAD     | 0.054069248  |
| CDA | Effector cd8+ memory t ( COAD     | 0.139006178  |
| CDA | Effector memory t cell COAD       | 0.062562007  |
| CDA | Effector regulatory t (treg COAD  | 0.060087949  |
| CDA | Elvidge_hif1a_targets_up COAD     | 0.021286794  |
| CDA | Endothelial cell COAD             | 0.055901603  |
| CDA | Eosinophil COAD                   | 0.136900417  |
| CDA | Ether lipid metabolism COAD       | 0.198676104  |
| CDA | Exhausted cd4+ t cell COAD        | 0.094961815  |
| CDA | Exhausted cd8+ t cell COAD        | 0.112201192  |
| CDA | Exhausted t cell COAD             | 0.019076378  |
| CDA | Fat cell (adipocyte) COAD         | 0.013247643  |
| CDA | Fatty acid biosynthesis COAD      | -0.009453478 |
| CDA | Fatty acid degradation COAD       | -0.082180292 |
| CDA | Fatty acid elongation COAD        | 0.027204226  |
| CDA | Fibroblast COAD                   | 0.138934429  |
| CDA | Folate biosynthesis COAD          | 0.133609228  |
| CDA | Follicular b cell COAD            | 0.057723328  |
| CDA | Follicular dendritic cell COAD    | 0.019371488  |
| CDA | Follicular helper (tfh) t ce COAD | 0.123887404  |
| CDA | Follicular t cell COAD            | 0.024128295  |
| CDA | Foxp3+il-17+ t cell COAD          | 0.003639647  |
| CDA | Fructose and mannose me COAD      | 0.083538018  |
| CDA | G2m_checkpoint COAD               | -0.188671389 |
| CDA | Galactose metabolism COAD         | 0.120587282  |
| CDA | Galie_tumor_stemness_ge COAD      | 0.134884819  |
| CDA | Glutathione metabolism COAD       | 0.235950085  |
| CDA | Glycerolipid metabolism COAD      | 0.143551239  |
| CDA | Glycerophospholipid metæ COAD     | 0.23966436   |
| CDA | Glycine, serine and threor COAD   | 0.053818042  |
| CDA | Glycolysis / gluconeogene COAD    | 0.053801607  |
| CDA | Glycosaminoglycan biosy1 COAD     | 0.165649654  |
| CDA | Glycosaminoglycan biosy1 COAD     | 0.065002873  |
| CDA | Glycosaminoglycan biosy1 COAD     | 0.241197152  |
| CDA | Glycosaminoglycan degra COAD      | 0.171415767  |
| CDA | Glycosphingolipid biosyn1 COAD    | 0.220179217  |
| CDA | Glycosphingolipid biosyn1 COAD    | 0.326917315  |
| CDA | Glycosphingolipid biosyn1 COAD    | 0.203729442  |

|     |                                |              |
|-----|--------------------------------|--------------|
| CDA | Glycosylphosphatidylinos: COAD | -0.1018943   |
| CDA | Glyoxylate and dicarboxy COAD  | -0.173738219 |
| CDA | Granulocyte COAD               | 0.12253639   |
| CDA | Hedgehog_signaling COAD        | 0.053709795  |
| CDA | Histidine metabolism COAD      | 0.081822807  |
| CDA | Hypoxia COAD                   | 0.235242646  |
| CDA | Il-17ralpha t cell COAD        | 0.040203029  |
| CDA | Il2_stat5_signaling COAD       | 0.192355946  |
| CDA | Il6_jak_stat3_signaling COAD   | 0.229830206  |
| CDA | Immune_checkpoints_tunr COAD   | 0.143343086  |
| CDA | Immune_inhibition_cytok COAD   | 0.224795451  |
| CDA | Inositol phosphate metabo COAD | 0.008632321  |
| CDA | Interleukin_6_signaling COAD   | 0.069124794  |
| CDA | Jaeger_metastasis_up COAD      | -0.014278119 |
| CDA | Jain_nfkb_signaling COAD       | -0.188084568 |
| CDA | Kras_signaling_up COAD         | 0.176274671  |
| CDA | Linoleic acid metabolism COAD  | 0.197593539  |
| CDA | Lipoic acid metabolism COAD    | -0.189728606 |
| CDA | Lysine degradation COAD        | -0.248238025 |
| CDA | Lysosome COAD                  | 0.253388689  |
| CDA | M1 macrophage COAD             | 0.09643461   |
| CDA | M2 macrophage COAD             | 0.08934748   |
| CDA | Mannose type o-glycan bi COAD  | -0.157833994 |
| CDA | Mapk_signaling_pathway COAD    | 0.187775642  |
| CDA | Mapk3_erk1_activation COAD     | 0.12439581   |
| CDA | Marginal zone b cell COAD      | -0.01427804  |
| CDA | Memory b cell COAD             | -0.025535077 |
| CDA | Mesenchymal cell COAD          | 0.222644457  |
| CDA | Mesenchymal stem cell COAD     | 0.141429344  |
| CDA | Metabolism of xenobiotic: COAD | 0.204526006  |
| CDA | Migrating cancer stem cel COAD | 0.093260201  |
| CDA | Mitotic_spindle COAD           | -0.078907432 |
| CDA | Monocyte COAD                  | 0.239005073  |
| CDA | Mtor_signaling_pathway COAD    | 0.008618944  |
| CDA | Mtorc1_signaling COAD          | 0.029848968  |
| CDA | Mucin type o-glycan biosy COAD | 0.067925076  |
| CDA | Myc_targets_v1 COAD            | -0.153781786 |
| CDA | Myeloid cell COAD              | 0.110693411  |
| CDA | N-glycan biosynthesis COAD     | 0.020300694  |
| CDA | Naive b cell COAD              | 0.047192109  |
| CDA | Naive cd4+ t cell COAD         | 0.020220048  |
| CDA | Naive cd8+ t cell COAD         | -0.071229708 |
| CDA | Natural killer cell COAD       | 0.096401338  |

|     |                             |      |              |
|-----|-----------------------------|------|--------------|
| CDA | Natural killer t (nkt) cell | COAD | -0.101633201 |
| CDA | Natural regulatory t (treg) | COAD | 0.0420906    |
| CDA | Neomycin, kanamycin and     | COAD | 0.150864943  |
| CDA | Neutrophil                  | COAD | 0.262600434  |
| CDA | Nicotinate and nicotinami   | COAD | 0.123747532  |
| CDA | Nitrogen metabolism         | COAD | 0.08401954   |
| CDA | Nod_like_receptor_signal    | COAD | 0.177637799  |
| CDA | Notch_signaling             | COAD | 0.090567071  |
| CDA | One carbon pool by folate   | COAD | -0.148321348 |
| CDA | Other glycan degradation    | COAD | -0.013726111 |
| CDA | Other types of o-glycan b   | COAD | -0.037347249 |
| CDA | Oxidative phosphorylatio    | COAD | 0.050800105  |
| CDA | P53_pathway                 | COAD | 0.185488849  |
| CDA | P53_signaling_pathway       | COAD | -0.001618827 |
| CDA | Pantothenate and coa bios   | COAD | 0.081201341  |
| CDA | Pentose and glucuronate i   | COAD | 0.031182525  |
| CDA | Pentose phosphate pathwa    | COAD | 0.064482672  |
| CDA | Pericyte                    | COAD | 0.181809527  |
| CDA | Phenylalanine metabolism    | COAD | 0.231671544  |
| CDA | Phenylalanine, tyrosine ar  | COAD | 0.084707221  |
| CDA | Phosphonate and phosphir    | COAD | 0.00716772   |
| CDA | Pi3k_akt_activation         | COAD | 0.049322109  |
| CDA | Pi3k_akt_mtor_signaling     | COAD | 0.077076912  |
| CDA | Porphyrin and chlorophyl    | COAD | 0.019404505  |
| CDA | Primary bile acid biosynt   | COAD | 0.067770997  |
| CDA | Propanoate metabolism       | COAD | -0.185988305 |
| CDA | Purine metabolism           | COAD | -0.10852424  |
| CDA | Pyrimidine metabolism       | COAD | -0.103294167 |
| CDA | Pyruvate metabolism         | COAD | -0.098898706 |
| CDA | Regulation_of_autophagy     | COAD | 0.054749867  |
| CDA | Retinol metabolism          | COAD | 0.162501754  |
| CDA | Riboflavin metabolism       | COAD | 0.003879582  |
| CDA | Schmahl_pdgf_signaling      | COAD | 0.205985469  |
| CDA | Selenocompound metabol      | COAD | -0.133636528 |
| CDA | Signaling_by_hippo          | COAD | 0.113610266  |
| CDA | Sphingolipid metabolism     | COAD | 0.179063168  |
| CDA | Starch and sucrose metabo   | COAD | -0.00016976  |
| CDA | Steroid biosynthesis        | COAD | 0.005774196  |
| CDA | Steroid hormone biosynth    | COAD | 0.238426299  |
| CDA | Sulfur metabolism           | COAD | 0.062693487  |
| CDA | Synthesis and degradation   | COAD | -0.101434718 |
| CDA | T helper cell               | COAD | 0.123579694  |
| CDA | T helper1 (th1) cell        | COAD | 0.118056003  |

|      |                            |      |              |
|------|----------------------------|------|--------------|
| CDA  | T helper17 (th17) cell     | COAD | 0.136412745  |
| CDA  | T helper2 (th2) cell       | COAD | 0.123440846  |
| CDA  | T helper9 (th9) cell       | COAD | 0.097712718  |
| CDA  | Taurine and hypotaurine r  | COAD | 0.115650947  |
| CDA  | Terpenoid backbone biosy   | COAD | -0.011647816 |
| CDA  | Tgf_beta_signaling_pathw   | COAD | -0.001799039 |
| CDA  | Thiamine metabolism        | COAD | 0.266317778  |
| CDA  | Tnfa_signaling_via_nfkb    | COAD | 0.22194361   |
| CDA  | Tryptophan metabolism      | COAD | -0.004828118 |
| CDA  | Tumor endothelial cell     | COAD | 0.093398154  |
| CDA  | Tyrosine metabolism        | COAD | 0.186836562  |
| CDA  | Ubiquinone and other terf  | COAD | -0.010934926 |
| CDA  | Valine, leucine and isoleu | COAD | 0.082154705  |
| CDA  | Valine, leucine and isoleu | COAD | -0.15011493  |
| CDA  | Vascular endothelial cell  | COAD | 0.134257758  |
| CDA  | Vascular smooth muscle c   | COAD | 0.107878541  |
| CDA  | Vegf_signaling_pathway     | COAD | 0.299172565  |
| CDA  | Vitamin b6 metabolism      | COAD | 0.019014144  |
| CDA  | Willert_wnt_signaling      | COAD | 0.000366078  |
| CDA  | Wnt_beta_catenin_signali   | COAD | -0.031043265 |
| UCK1 | Abnormal plasma cell       | COAD | 0.087623792  |
| UCK1 | Activated b cell           | COAD | 0.00619824   |
| UCK1 | Activated cd4+ t cell      | COAD | -0.033804618 |
| UCK1 | Activated t cell           | COAD | -0.01525823  |
| UCK1 | Alanine, aspartate and glu | COAD | -0.009128512 |
| UCK1 | Alcala_apoptosis           | COAD | 0.01094114   |
| UCK1 | Alpha-linolenic acid meta  | COAD | 0.057096723  |
| UCK1 | Amino sugar and nucleoti   | COAD | 0.099972445  |
| UCK1 | Ampk_pathway               | COAD | 0.097216979  |
| UCK1 | Angiogenesis               | COAD | 0.081867141  |
| UCK1 | Arachidonic acid metabol:  | COAD | 0.124432965  |
| UCK1 | Arginine and proline metæ  | COAD | 0.078898933  |
| UCK1 | Arginine biosynthesis      | COAD | 0.035408959  |
| UCK1 | Ascorbate and aldarate mε  | COAD | -0.062587087 |
| UCK1 | Atypical memory b cell     | COAD | 0.011214988  |
| UCK1 | Axl+siglec6+ dendritic ce  | COAD | 0.005968334  |
| UCK1 | B cell                     | COAD | -0.048087813 |
| UCK1 | B1 cell                    | COAD | 0.035469974  |
| UCK1 | Basal cell                 | COAD | 0.052371235  |
| UCK1 | Beta-alanine metabolism    | COAD | -0.031616997 |
| UCK1 | Biosynthesis of unsaturate | COAD | -0.020722054 |
| UCK1 | Biotin metabolism          | COAD | -0.112380534 |
| UCK1 | Butanoate metabolism       | COAD | -0.070841374 |

|      |                             |      |              |
|------|-----------------------------|------|--------------|
| UCK1 | Caffeine metabolism         | COAD | -0.136915734 |
| UCK1 | Cancer stem cell            | COAD | -0.096514131 |
| UCK1 | Cancer stem-like cell       | COAD | -0.164000754 |
| UCK1 | Cd4+ cytotoxic t cell       | COAD | 0.030060414  |
| UCK1 | Cd4+ memory t cell          | COAD | 0.069022313  |
| UCK1 | Cd4+ regulatory t cell      | COAD | 0.021690843  |
| UCK1 | Cd4+ t helper cell          | COAD | -0.036741743 |
| UCK1 | Cd4+cd25+ regulatory t c    | COAD | -0.03929939  |
| UCK1 | Cd8+ cytotoxic t cell       | COAD | 0.046659265  |
| UCK1 | Cd8+ regulatory t cell      | COAD | -0.013444699 |
| UCK1 | Cell_cycle                  | COAD | -0.171069412 |
| UCK1 | Chandran_metastasis_top5    | COAD | -0.317705065 |
| UCK1 | Citrate cycle (tca cycle)   | COAD | -0.051235402 |
| UCK1 | Cysteine and methionine r   | COAD | -0.018489903 |
| UCK1 | Cytokine induced killer c   | COAD | 0.079945312  |
| UCK1 | D-arginine and d-ornithin   | COAD | -0.062406916 |
| UCK1 | D-glutamine and d-glutan    | COAD | -0.167920589 |
| UCK1 | Dendritic cell              | COAD | 0.039405785  |
| UCK1 | Dna_repair                  | COAD | 0.123385855  |
| UCK1 | Dna_replication             | COAD | -0.003926732 |
| UCK1 | Double-negative memory      | COAD | 0.147248414  |
| UCK1 | Drug metabolism - cytoch    | COAD | -0.021676643 |
| UCK1 | Drug metabolism - other c   | COAD | 0.00977921   |
| UCK1 | E2f_targets                 | COAD | -0.208311629 |
| UCK1 | Ecm_receptor_interaction    | COAD | 0.087369856  |
| UCK1 | Effector cd4+ memory t (    | COAD | -0.111183237 |
| UCK1 | Effector cd8+ memory t (    | COAD | 0.046860598  |
| UCK1 | Effector memory t cell      | COAD | -0.054140708 |
| UCK1 | Effector regulatory t (treg | COAD | -0.088866798 |
| UCK1 | Elvidge_hif1a_targets_up    | COAD | -0.182248127 |
| UCK1 | Endothelial cell            | COAD | -0.056649475 |
| UCK1 | Eosinophil                  | COAD | 0.010948177  |
| UCK1 | Ether lipid metabolism      | COAD | -0.083843625 |
| UCK1 | Exhausted cd4+ t cell       | COAD | -0.117075784 |
| UCK1 | Exhausted cd8+ t cell       | COAD | -0.052945458 |
| UCK1 | Exhausted t cell            | COAD | 0.006836038  |
| UCK1 | Fat cell (adipocyte)        | COAD | 0.221756248  |
| UCK1 | Fatty acid biosynthesis     | COAD | -0.130484987 |
| UCK1 | Fatty acid degradation      | COAD | -0.084097856 |
| UCK1 | Fatty acid elongation       | COAD | -0.051291916 |
| UCK1 | Fibroblast                  | COAD | 0.036010097  |
| UCK1 | Folate biosynthesis         | COAD | 0.116172406  |
| UCK1 | Follicular b cell           | COAD | 0.030673494  |

|      |                              |      |              |
|------|------------------------------|------|--------------|
| UCK1 | Follicular dendritic cell    | COAD | 0.047983066  |
| UCK1 | Follicular helper (tfh) t ce | COAD | -0.005448289 |
| UCK1 | Follicular t cell            | COAD | 0.121565584  |
| UCK1 | Foxp3+il-17+ t cell          | COAD | 0.129441795  |
| UCK1 | Fructose and mannose me      | COAD | 0.179944864  |
| UCK1 | G2m_checkpoint               | COAD | -0.234804012 |
| UCK1 | Galactose metabolism         | COAD | 0.194178418  |
| UCK1 | Galie_tumor_stemness_ge      | COAD | 0.126055117  |
| UCK1 | Glutathione metabolism       | COAD | -0.025094434 |
| UCK1 | Glycerolipid metabolism      | COAD | 0.06439391   |
| UCK1 | Glycerophospholipid metæ     | COAD | 0.088909885  |
| UCK1 | Glycine, serine and threor   | COAD | 0.267333908  |
| UCK1 | Glycolysis / gluconeogene    | COAD | 0.074541058  |
| UCK1 | Glycosaminoglycan biosy      | COAD | 0.286644682  |
| UCK1 | Glycosaminoglycan biosy      | COAD | 0.113554279  |
| UCK1 | Glycosaminoglycan biosy      | COAD | 0.075799338  |
| UCK1 | Glycosaminoglycan degra      | COAD | 0.207857932  |
| UCK1 | Glycosphingolipid biosyn     | COAD | 0.213401493  |
| UCK1 | Glycosphingolipid biosyn     | COAD | 0.138745257  |
| UCK1 | Glycosphingolipid biosyn     | COAD | 0.050257427  |
| UCK1 | Glycosylphosphatidylinos     | COAD | -0.090246704 |
| UCK1 | Glyoxylate and dicarboxy     | COAD | 0.089065126  |
| UCK1 | Granulocyte                  | COAD | -0.039287662 |
| UCK1 | Hedgehog_signaling           | COAD | 0.108707409  |
| UCK1 | Histidine metabolism         | COAD | 0.048611516  |
| UCK1 | Hypoxia                      | COAD | 0.046868218  |
| UCK1 | Il-17alpha t cell            | COAD | 0.0079433    |
| UCK1 | Il2_stat5_signaling          | COAD | -0.02236597  |
| UCK1 | Il6_jak_stat3_signaling      | COAD | -0.060567353 |
| UCK1 | Immune_checkpoints_tun       | COAD | 0.01077748   |
| UCK1 | Immune_inhibition_cytok      | COAD | -0.078590202 |
| UCK1 | Inositol phosphate metabo    | COAD | -0.194573178 |
| UCK1 | Interleukin_6_signaling      | COAD | -0.17902388  |
| UCK1 | Jaeger_metastasis_up         | COAD | -0.029686801 |
| UCK1 | Jain_nfkb_signaling          | COAD | -0.092317594 |
| UCK1 | Kras_signaling_up            | COAD | -0.052296114 |
| UCK1 | Linoleic acid metabolism     | COAD | 0.025523275  |
| UCK1 | Lipoic acid metabolism       | COAD | -0.051503467 |
| UCK1 | Lysine degradation           | COAD | 0.050246769  |
| UCK1 | Lysosome                     | COAD | 0.169406586  |
| UCK1 | M1 macrophage                | COAD | -0.062440765 |
| UCK1 | M2 macrophage                | COAD | -0.030757628 |
| UCK1 | Mannose type o-glycan bi     | COAD | 0.223258753  |

|      |                             |      |              |
|------|-----------------------------|------|--------------|
| UCK1 | Mapk_signaling_pathway      | COAD | 0.024860508  |
| UCK1 | Mapk3_erk1_activation       | COAD | -0.221048698 |
| UCK1 | Marginal zone b cell        | COAD | -0.021980473 |
| UCK1 | Memory b cell               | COAD | -0.014628761 |
| UCK1 | Mesenchymal cell            | COAD | 0.132147312  |
| UCK1 | Mesenchymal stem cell       | COAD | 0.002353066  |
| UCK1 | Metabolism of xenobiotic    | COAD | 0.054860962  |
| UCK1 | Migrating cancer stem cel   | COAD | -0.162823353 |
| UCK1 | Mitotic_spindle             | COAD | -0.134017997 |
| UCK1 | Monocyte                    | COAD | -0.044830249 |
| UCK1 | Mtor_signaling_pathway      | COAD | 0.094508514  |
| UCK1 | Mtorc1_signaling            | COAD | -0.250330306 |
| UCK1 | Mucin type o-glycan bios    | COAD | -0.203571052 |
| UCK1 | Myc_targets_v1              | COAD | -0.183617326 |
| UCK1 | Myeloid cell                | COAD | -0.007045823 |
| UCK1 | N-glycan biosynthesis       | COAD | 0.096052603  |
| UCK1 | Naive b cell                | COAD | 0.082869429  |
| UCK1 | Naive cd4+ t cell           | COAD | -0.02572098  |
| UCK1 | Naive cd8+ t cell           | COAD | 0.012131117  |
| UCK1 | Natural killer cell         | COAD | -9.42E-05    |
| UCK1 | Natural killer t (nkt) cell | COAD | -0.237258832 |
| UCK1 | Natural regulatory t (treg) | COAD | -0.047546532 |
| UCK1 | Neomycin, kanamycin and     | COAD | 0.152133205  |
| UCK1 | Neutrophil                  | COAD | -0.06838132  |
| UCK1 | Nicotinate and nicotinami   | COAD | 0.034842349  |
| UCK1 | Nitrogen metabolism         | COAD | -0.072322019 |
| UCK1 | Nod_like_receptor_signal    | COAD | -0.174503393 |
| UCK1 | Notch_signaling             | COAD | 0.125628478  |
| UCK1 | One carbon pool by folate   | COAD | -0.133812999 |
| UCK1 | Other glycan degradation    | COAD | 0.234584252  |
| UCK1 | Other types of o-glycan b   | COAD | 0.36820025   |
| UCK1 | Oxidative phosphorylatio    | COAD | 0.084575246  |
| UCK1 | P53_pathway                 | COAD | 0.042938538  |
| UCK1 | P53_signaling_pathway       | COAD | -0.332192428 |
| UCK1 | Pantothenate and coa bios   | COAD | -0.15737217  |
| UCK1 | Pentose and glucuronate i   | COAD | -0.039144229 |
| UCK1 | Pentose phosphate pathwa    | COAD | 0.081999456  |
| UCK1 | Pericyte                    | COAD | 0.075242472  |
| UCK1 | Phenylalanine metabolism    | COAD | 0.192757581  |
| UCK1 | Phenylalanine, tyrosine ar  | COAD | -0.007462098 |
| UCK1 | Phosphonate and phosphir    | COAD | -0.132633916 |
| UCK1 | Pi3k_akt_activation         | COAD | -0.050685262 |
| UCK1 | Pi3k_akt_mtor_signaling     | COAD | -0.1603396   |

|      |                            |      |              |
|------|----------------------------|------|--------------|
| UCK1 | Porphyrin and chlorophyl   | COAD | 0.076139912  |
| UCK1 | Primary bile acid biosynt  | COAD | 0.181697393  |
| UCK1 | Propanoate metabolism      | COAD | -0.216920376 |
| UCK1 | Purine metabolism          | COAD | 0.087862858  |
| UCK1 | Pyrimidine metabolism      | COAD | 0.113996779  |
| UCK1 | Pyruvate metabolism        | COAD | -0.024890701 |
| UCK1 | Regulation_of_autophagy    | COAD | -0.157166337 |
| UCK1 | Retinol metabolism         | COAD | 0.058154034  |
| UCK1 | Riboflavin metabolism      | COAD | 0.173424596  |
| UCK1 | Schmahl_pdgf_signaling     | COAD | -0.206507087 |
| UCK1 | Selenocompound metabol     | COAD | -0.090539345 |
| UCK1 | Signaling_by_hippo         | COAD | -0.225849419 |
| UCK1 | Sphingolipid metabolism    | COAD | -0.091143039 |
| UCK1 | Starch and sucrose metabo  | COAD | -0.032024786 |
| UCK1 | Steroid biosynthesis       | COAD | -0.043557746 |
| UCK1 | Steroid hormone biosynth   | COAD | 0.059469722  |
| UCK1 | Sulfur metabolism          | COAD | -0.130165354 |
| UCK1 | Synthesis and degradation  | COAD | -0.010612978 |
| UCK1 | T helper cell              | COAD | 0.001495176  |
| UCK1 | T helper1 (th1) cell       | COAD | -0.041378714 |
| UCK1 | T helper17 (th17) cell     | COAD | -0.076347821 |
| UCK1 | T helper2 (th2) cell       | COAD | 0.005208805  |
| UCK1 | T helper9 (th9) cell       | COAD | 0.006233595  |
| UCK1 | Taurine and hypotaurine r  | COAD | 0.149120974  |
| UCK1 | Terpenoid backbone biosy   | COAD | -0.199952335 |
| UCK1 | Tgf_beta_signaling_pathw   | COAD | -0.039022345 |
| UCK1 | Thiamine metabolism        | COAD | 0.13106498   |
| UCK1 | Tnfa_signaling_via_nfk     | COAD | -0.095120243 |
| UCK1 | Tryptophan metabolism      | COAD | 0.026611705  |
| UCK1 | Tumor endothelial cell     | COAD | 0.10677595   |
| UCK1 | Tyrosine metabolism        | COAD | 0.279866453  |
| UCK1 | Ubiquinone and other ter   | COAD | -0.053746656 |
| UCK1 | Valine, leucine and isoleu | COAD | 0.090966837  |
| UCK1 | Valine, leucine and isoleu | COAD | -0.097580349 |
| UCK1 | Vascular endothelial cell  | COAD | 0.202621206  |
| UCK1 | Vascular smooth muscle c   | COAD | 0.141843308  |
| UCK1 | Vegf_signaling_pathway     | COAD | -0.0074724   |
| UCK1 | Vitamin b6 metabolism      | COAD | -0.067148468 |
| UCK1 | Willert_wnt_signaling      | COAD | -0.119718871 |
| UCK1 | Wnt_beta_catenin_signali   | COAD | 0.239908214  |
| UCK2 | Abnormal plasma cell       | COAD | -0.037515144 |
| UCK2 | Activated b cell           | COAD | 0.007265665  |
| UCK2 | Activated cd4+ t cell      | COAD | -0.08902414  |



|      |                            |      |              |
|------|----------------------------|------|--------------|
| UCK2 | Activated t cell           | COAD | -0.014391703 |
| UCK2 | Alanine, aspartate and glu | COAD | 0.378639499  |
| UCK2 | Alcala_apoptosis           | COAD | 0.398516648  |
| UCK2 | Alpha-linolenic acid meta  | COAD | 0.014450829  |
| UCK2 | Amino sugar and nucleoti   | COAD | 0.270697896  |
| UCK2 | Ampk_pathway               | COAD | 0.315381994  |
| UCK2 | Angiogenesis               | COAD | 0.031183292  |
| UCK2 | Arachidonic acid metabol:  | COAD | -0.004722948 |
| UCK2 | Arginine and proline metæ  | COAD | 0.459386957  |
| UCK2 | Arginine biosynthesis      | COAD | 0.332594905  |
| UCK2 | Ascorbate and aldarate mε  | COAD | 0.088990657  |
| UCK2 | Atypical memory b cell     | COAD | -0.069053936 |
| UCK2 | Axl+siglec6+ dendritic ce  | COAD | -0.15862387  |
| UCK2 | B cell                     | COAD | -0.038601554 |
| UCK2 | B1 cell                    | COAD | 0.08643163   |
| UCK2 | Basal cell                 | COAD | 0.07587472   |
| UCK2 | Beta-alanine metabolism    | COAD | 0.161361976  |
| UCK2 | Biosynthesis of unsaturate | COAD | 0.28904489   |
| UCK2 | Biotin metabolism          | COAD | 0.111594523  |
| UCK2 | Butanoate metabolism       | COAD | 0.150613365  |
| UCK2 | Caffeine metabolism        | COAD | -0.027629303 |
| UCK2 | Cancer stem cell           | COAD | -0.137087917 |
| UCK2 | Cancer stem-like cell      | COAD | -0.091063659 |
| UCK2 | Cd4+ cytotoxic t cell      | COAD | -0.050606356 |
| UCK2 | Cd4+ memory t cell         | COAD | -0.025472846 |
| UCK2 | Cd4+ regulatory t cell     | COAD | -0.072236481 |
| UCK2 | Cd4+ t helper cell         | COAD | -0.11677849  |
| UCK2 | Cd4+cd25+ regulatory t c   | COAD | -0.093253144 |
| UCK2 | Cd8+ cytotoxic t cell      | COAD | 0.040570454  |
| UCK2 | Cd8+ regulatory t cell     | COAD | 0.009723266  |
| UCK2 | Cell_cycle                 | COAD | 0.343786348  |
| UCK2 | Chandran_metastasis_top5   | COAD | 0.179641128  |
| UCK2 | Citrate cycle (tca cycle)  | COAD | 0.381456545  |
| UCK2 | Cysteine and methionine r  | COAD | 0.413876227  |
| UCK2 | Cytokine induced killer cε | COAD | 0.031015534  |
| UCK2 | D-arginine and d-ornithin  | COAD | -0.018465095 |
| UCK2 | D-glutamine and d-glutan   | COAD | 0.177053502  |
| UCK2 | Dendritic cell             | COAD | -0.067409774 |
| UCK2 | Dna_repair                 | COAD | 0.494422599  |
| UCK2 | Dna_replication            | COAD | 0.452919808  |
| UCK2 | Double-negative memory     | COAD | -0.039807418 |
| UCK2 | Drug metabolism - cytoch   | COAD | -0.046149105 |
| UCK2 | Drug metabolism - other ε  | COAD | 0.317888115  |

|      |                              |      |              |
|------|------------------------------|------|--------------|
| UCK2 | E2f_targets                  | COAD | 0.371775308  |
| UCK2 | Ecm_receptor_interaction     | COAD | -0.003517936 |
| UCK2 | Effector cd4+ memory t (     | COAD | -0.164419483 |
| UCK2 | Effector cd8+ memory t (     | COAD | -0.033476938 |
| UCK2 | Effector memory t cell       | COAD | -0.120851331 |
| UCK2 | Effector regulatory t (treg  | COAD | -0.191651113 |
| UCK2 | Elvidge_hif1a_targets_up     | COAD | 0.334521847  |
| UCK2 | Endothelial cell             | COAD | -0.048198456 |
| UCK2 | Eosinophil                   | COAD | -0.039822088 |
| UCK2 | Ether lipid metabolism       | COAD | -0.06982001  |
| UCK2 | Exhausted cd4+ t cell        | COAD | -0.112694082 |
| UCK2 | Exhausted cd8+ t cell        | COAD | -0.06746413  |
| UCK2 | Exhausted t cell             | COAD | 0.022338301  |
| UCK2 | Fat cell (adipocyte)         | COAD | 0.156735378  |
| UCK2 | Fatty acid biosynthesis      | COAD | 0.234588646  |
| UCK2 | Fatty acid degradation       | COAD | 0.129111571  |
| UCK2 | Fatty acid elongation        | COAD | 0.326959654  |
| UCK2 | Fibroblast                   | COAD | -0.153024661 |
| UCK2 | Folate biosynthesis          | COAD | 0.305259307  |
| UCK2 | Follicular b cell            | COAD | -0.04922127  |
| UCK2 | Follicular dendritic cell    | COAD | 0.002948711  |
| UCK2 | Follicular helper (tfh) t ce | COAD | -0.065839185 |
| UCK2 | Follicular t cell            | COAD | 0.125164005  |
| UCK2 | Foxp3+il-17+ t cell          | COAD | 0.190290868  |
| UCK2 | Fructose and mannose me      | COAD | 0.377377769  |
| UCK2 | G2m_checkpoint               | COAD | 0.337214185  |
| UCK2 | Galactose metabolism         | COAD | 0.30477135   |
| UCK2 | Galie_tumor_stemness_ge      | COAD | 0.038148248  |
| UCK2 | Glutathione metabolism       | COAD | 0.244762928  |
| UCK2 | Glycerolipid metabolism      | COAD | 0.123287797  |
| UCK2 | Glycerophospholipid metæ     | COAD | 0.025177927  |
| UCK2 | Glycine, serine and threor   | COAD | 0.436901064  |
| UCK2 | Glycolysis / gluconeogene    | COAD | 0.401343618  |
| UCK2 | Glycosaminoglycan biosy1     | COAD | 0.031248418  |
| UCK2 | Glycosaminoglycan biosy1     | COAD | 0.001947941  |
| UCK2 | Glycosaminoglycan biosy1     | COAD | 0.096457459  |
| UCK2 | Glycosaminoglycan degra      | COAD | -0.054404375 |
| UCK2 | Glycosphingolipid biosyn1    | COAD | -0.091845115 |
| UCK2 | Glycosphingolipid biosyn1    | COAD | 0.01850412   |
| UCK2 | Glycosphingolipid biosyn1    | COAD | -0.049840023 |
| UCK2 | Glycosylphosphatidylinos:    | COAD | 0.101650764  |
| UCK2 | Glyoxylate and dicarboxy     | COAD | 0.377566658  |
| UCK2 | Granulocyte                  | COAD | -0.083433605 |

|      |                             |      |              |
|------|-----------------------------|------|--------------|
| UCK2 | Hedgehog_signaling          | COAD | -0.075047036 |
| UCK2 | Histidine metabolism        | COAD | 0.245019898  |
| UCK2 | Hypoxia                     | COAD | 0.061958557  |
| UCK2 | Il-17alpha t cell           | COAD | 0.006824075  |
| UCK2 | Il2_stat5_signaling         | COAD | -0.002519662 |
| UCK2 | Il6_jak_stat3_signaling     | COAD | -0.112297501 |
| UCK2 | Immune_checkpoints_tun      | COAD | 0.030171778  |
| UCK2 | Immune_inhibition_cytok     | COAD | -0.065492738 |
| UCK2 | Inositol phosphate metabo   | COAD | -0.145544738 |
| UCK2 | Interleukin_6_signaling     | COAD | -0.058185391 |
| UCK2 | Jaeger_metastasis_up        | COAD | 0.228951726  |
| UCK2 | Jain_nfkb_signaling         | COAD | 0.422672985  |
| UCK2 | Kras_signaling_up           | COAD | -0.071669558 |
| UCK2 | Linoleic acid metabolism    | COAD | -0.016390649 |
| UCK2 | Lipoic acid metabolism      | COAD | 0.098867648  |
| UCK2 | Lysine degradation          | COAD | 0.328329727  |
| UCK2 | Lysosome                    | COAD | -0.040344747 |
| UCK2 | M1 macrophage               | COAD | -0.065909621 |
| UCK2 | M2 macrophage               | COAD | -0.087715295 |
| UCK2 | Mannose type o-glycan bi    | COAD | 0.152358034  |
| UCK2 | Mapk_signaling_pathway      | COAD | -0.050348603 |
| UCK2 | Mapk3_erk1_activation       | COAD | -0.004021194 |
| UCK2 | Marginal zone b cell        | COAD | -0.038179138 |
| UCK2 | Memory b cell               | COAD | -0.055689158 |
| UCK2 | Mesenchymal cell            | COAD | -0.027824888 |
| UCK2 | Mesenchymal stem cell       | COAD | -0.164584643 |
| UCK2 | Metabolism of xenobiotic    | COAD | 0.060610552  |
| UCK2 | Migrating cancer stem cel   | COAD | -0.000438417 |
| UCK2 | Mitotic_spindle             | COAD | 0.113422488  |
| UCK2 | Monocyte                    | COAD | -0.109240197 |
| UCK2 | Mtor_signaling_pathway      | COAD | -0.007849629 |
| UCK2 | Mtorc1_signaling            | COAD | 0.381182244  |
| UCK2 | Mucin type o-glycan biosy   | COAD | -0.098451322 |
| UCK2 | Myc_targets_v1              | COAD | 0.422118163  |
| UCK2 | Myeloid cell                | COAD | -0.081725558 |
| UCK2 | N-glycan biosynthesis       | COAD | 0.200614743  |
| UCK2 | Naive b cell                | COAD | -0.04050391  |
| UCK2 | Naive cd4+ t cell           | COAD | -0.168340342 |
| UCK2 | Naive cd8+ t cell           | COAD | -0.116709975 |
| UCK2 | Natural killer cell         | COAD | -0.011648214 |
| UCK2 | Natural killer t (nkt) cell | COAD | 0.076006821  |
| UCK2 | Natural regulatory t (treg) | COAD | -0.108241958 |
| UCK2 | Neomycin, kanamycin and     | COAD | 0.163236719  |

|      |                            |      |              |
|------|----------------------------|------|--------------|
| UCK2 | Neutrophil                 | COAD | -0.007722459 |
| UCK2 | Nicotinate and nicotinami  | COAD | 0.03621476   |
| UCK2 | Nitrogen metabolism        | COAD | 0.062462574  |
| UCK2 | Nod_like_receptor_signal   | COAD | -0.112045747 |
| UCK2 | Notch_signaling            | COAD | 0.165849238  |
| UCK2 | One carbon pool by folate  | COAD | 0.429996778  |
| UCK2 | Other glycan degradation   | COAD | 0.030175036  |
| UCK2 | Other types of o-glycan b  | COAD | 0.097490339  |
| UCK2 | Oxidative phosphorylatior  | COAD | 0.312716611  |
| UCK2 | P53_pathway                | COAD | 0.150693031  |
| UCK2 | P53_signaling_pathway      | COAD | 0.056012915  |
| UCK2 | Pantothenate and coa bios  | COAD | 0.095288403  |
| UCK2 | Pentose and glucuronate i  | COAD | 0.072776229  |
| UCK2 | Pentose phosphate pathwa   | COAD | 0.369754299  |
| UCK2 | Pericyte                   | COAD | -0.150483506 |
| UCK2 | Phenylalanine metabolism   | COAD | 0.287636213  |
| UCK2 | Phenylalanine, tyrosine ar | COAD | 0.251017284  |
| UCK2 | Phosphonate and phosphir   | COAD | -0.020981052 |
| UCK2 | Pi3k_akt_activation        | COAD | -0.14687351  |
| UCK2 | Pi3k_akt_mtor_signaling    | COAD | 0.088631928  |
| UCK2 | Porphyrin and chlorophyl   | COAD | 0.321333076  |
| UCK2 | Primary bile acid biosynt  | COAD | 0.075995372  |
| UCK2 | Propanoate metabolism      | COAD | 0.106848531  |
| UCK2 | Purine metabolism          | COAD | 0.579439026  |
| UCK2 | Pyrimidine metabolism      | COAD | 0.57184695   |
| UCK2 | Pyruvate metabolism        | COAD | 0.352721381  |
| UCK2 | Regulation_of_autophagy    | COAD | -0.307523551 |
| UCK2 | Retinol metabolism         | COAD | 0.079739062  |
| UCK2 | Riboflavin metabolism      | COAD | 0.267348319  |
| UCK2 | Schmahl_pdgf_signaling     | COAD | -0.287433965 |
| UCK2 | Selenocompound metabol     | COAD | 0.408447225  |
| UCK2 | Signaling_by_hippo         | COAD | -0.058928799 |
| UCK2 | Sphingolipid metabolism    | COAD | -0.070776147 |
| UCK2 | Starch and sucrose metabo  | COAD | 0.014676141  |
| UCK2 | Steroid biosynthesis       | COAD | 0.214621478  |
| UCK2 | Steroid hormone biosynth   | COAD | 0.019705741  |
| UCK2 | Sulfur metabolism          | COAD | 0.198086516  |
| UCK2 | Synthesis and degradation  | COAD | 0.218637948  |
| UCK2 | T helper cell              | COAD | -0.074461333 |
| UCK2 | T helper1 (th1) cell       | COAD | 0.012582195  |
| UCK2 | T helper17 (th17) cell     | COAD | -0.101680533 |
| UCK2 | T helper2 (th2) cell       | COAD | -0.03788623  |
| UCK2 | T helper9 (th9) cell       | COAD | -0.204424614 |

|       |                            |      |              |
|-------|----------------------------|------|--------------|
| UCK2  | Taurine and hypotaurine r  | COAD | -0.026651151 |
| UCK2  | Terpenoid backbone biosy   | COAD | 0.277128935  |
| UCK2  | Tgf_beta_signaling_pathw   | COAD | -0.071660912 |
| UCK2  | Thiamine metabolism        | COAD | 0.368277661  |
| UCK2  | Tnfa_signaling_via_nfk     | COAD | -0.039721816 |
| UCK2  | Tryptophan metabolism      | COAD | 0.239001028  |
| UCK2  | Tumor endothelial cell     | COAD | 0.179196059  |
| UCK2  | Tyrosine metabolism        | COAD | 0.286196421  |
| UCK2  | Ubiquinone and other ter   | COAD | 0.355424382  |
| UCK2  | Valine, leucine and isoleu | COAD | 0.135016041  |
| UCK2  | Valine, leucine and isoleu | COAD | 0.182951329  |
| UCK2  | Vascular endothelial cell  | COAD | 0.049626777  |
| UCK2  | Vascular smooth muscle c   | COAD | -0.081574426 |
| UCK2  | Vegf_signaling_pathway     | COAD | -0.114318582 |
| UCK2  | Vitamin b6 metabolism      | COAD | 0.167548102  |
| UCK2  | Willert_wnt_signaling      | COAD | 0.185671128  |
| UCK2  | Wnt_beta_catenin_signali   | COAD | 0.124847987  |
| UCKL1 | Abnormal plasma cell       | COAD | -0.128432243 |
| UCKL1 | Activated b cell           | COAD | -0.287331296 |
| UCKL1 | Activated cd4+ t cell      | COAD | -0.251393715 |
| UCKL1 | Activated t cell           | COAD | -0.306638389 |
| UCKL1 | Alanine, aspartate and glu | COAD | -0.032354924 |
| UCKL1 | Alcala_apoptosis           | COAD | -0.206679248 |
| UCKL1 | Alpha-linolenic acid meta  | COAD | 0.120351042  |
| UCKL1 | Amino sugar and nucleoti   | COAD | -0.2399823   |
| UCKL1 | Ampk_pathway               | COAD | 0.167800153  |
| UCKL1 | Angiogenesis               | COAD | -0.160614947 |
| UCKL1 | Arachidonic acid metabol   | COAD | -0.058356846 |
| UCKL1 | Arginine and proline met   | COAD | -0.021273563 |
| UCKL1 | Arginine biosynthesis      | COAD | 0.003561988  |
| UCKL1 | Ascorbate and aldarate m   | COAD | -0.163265911 |
| UCKL1 | Atypical memory b cell     | COAD | -0.101435618 |
| UCKL1 | Axl+siglec6+ dendritic ce  | COAD | -0.326420702 |
| UCKL1 | B cell                     | COAD | -0.397958312 |
| UCKL1 | B1 cell                    | COAD | -0.135210142 |
| UCKL1 | Basal cell                 | COAD | -0.151611913 |
| UCKL1 | Beta-alanine metabolism    | COAD | -0.332675439 |
| UCKL1 | Biosynthesis of unsaturate | COAD | 0.007739322  |
| UCKL1 | Biotin metabolism          | COAD | -0.189540556 |
| UCKL1 | Butanoate metabolism       | COAD | -0.190419152 |
| UCKL1 | Caffeine metabolism        | COAD | -0.166007348 |
| UCKL1 | Cancer stem cell           | COAD | -0.36634068  |
| UCKL1 | Cancer stem-like cell      | COAD | -0.387686028 |

|       |                              |      |              |
|-------|------------------------------|------|--------------|
| UCKL1 | Cd4+ cytotoxic t cell        | COAD | -0.303444608 |
| UCKL1 | Cd4+ memory t cell           | COAD | -0.153687053 |
| UCKL1 | Cd4+ regulatory t cell       | COAD | -0.205673836 |
| UCKL1 | Cd4+ t helper cell           | COAD | -0.294391396 |
| UCKL1 | Cd4+cd25+ regulatory t c     | COAD | -0.296006737 |
| UCKL1 | Cd8+ cytotoxic t cell        | COAD | -0.166754945 |
| UCKL1 | Cd8+ regulatory t cell       | COAD | -0.293163907 |
| UCKL1 | Cell_cycle                   | COAD | -0.209425942 |
| UCKL1 | Chandran_metastasis_top5     | COAD | -0.134970501 |
| UCKL1 | Citrate cycle (tca cycle)    | COAD | -0.063020127 |
| UCKL1 | Cysteine and methionine r    | COAD | -0.012948709 |
| UCKL1 | Cytokine induced killer ce   | COAD | -0.194641099 |
| UCKL1 | D-arginine and d-ornithin    | COAD | -0.060563869 |
| UCKL1 | D-glutamine and d-glutan     | COAD | -0.027595263 |
| UCKL1 | Dendritic cell               | COAD | -0.227688609 |
| UCKL1 | Dna_repair                   | COAD | 0.073750193  |
| UCKL1 | Dna_replication              | COAD | -0.031208501 |
| UCKL1 | Double-negative memory       | COAD | -0.036712136 |
| UCKL1 | Drug metabolism - cytoch     | COAD | -0.16219678  |
| UCKL1 | Drug metabolism - other c    | COAD | -0.012955765 |
| UCKL1 | E2f_targets                  | COAD | -0.189911271 |
| UCKL1 | Ecm_receptor_interaction     | COAD | -0.122359422 |
| UCKL1 | Effector cd4+ memory t (     | COAD | -0.324204639 |
| UCKL1 | Effector cd8+ memory t (     | COAD | -0.273871259 |
| UCKL1 | Effector memory t cell       | COAD | -0.322130542 |
| UCKL1 | Effector regulatory t (treg  | COAD | -0.319411732 |
| UCKL1 | Elvidge_hif1a_targets_up     | COAD | -0.121381198 |
| UCKL1 | Endothelial cell             | COAD | -0.386355301 |
| UCKL1 | Eosinophil                   | COAD | -0.239651766 |
| UCKL1 | Ether lipid metabolism       | COAD | -0.216911347 |
| UCKL1 | Exhausted cd4+ t cell        | COAD | -0.462387979 |
| UCKL1 | Exhausted cd8+ t cell        | COAD | -0.411496916 |
| UCKL1 | Exhausted t cell             | COAD | -0.280875262 |
| UCKL1 | Fat cell (adipocyte)         | COAD | 0.055470804  |
| UCKL1 | Fatty acid biosynthesis      | COAD | -0.024377911 |
| UCKL1 | Fatty acid degradation       | COAD | -0.169843488 |
| UCKL1 | Fatty acid elongation        | COAD | -0.247344002 |
| UCKL1 | Fibroblast                   | COAD | -0.248908103 |
| UCKL1 | Folate biosynthesis          | COAD | 0.017440281  |
| UCKL1 | Follicular b cell            | COAD | -0.214438557 |
| UCKL1 | Follicular dendritic cell    | COAD | -0.1970542   |
| UCKL1 | Follicular helper (tfh) t ce | COAD | -0.225161535 |
| UCKL1 | Follicular t cell            | COAD | -0.047588545 |

|       |                            |      |              |
|-------|----------------------------|------|--------------|
| UCKL1 | Foxp3+il-17+ t cell        | COAD | 0.003253849  |
| UCKL1 | Fructose and mannose me    | COAD | 0.017869051  |
| UCKL1 | G2m_checkpoint             | COAD | -0.257752385 |
| UCKL1 | Galactose metabolism       | COAD | -0.004423472 |
| UCKL1 | Galie_tumor_stemness_ge    | COAD | 0.053697842  |
| UCKL1 | Glutathione metabolism     | COAD | -0.070272537 |
| UCKL1 | Glycerolipid metabolism    | COAD | 0.09565338   |
| UCKL1 | Glycerophospholipid metæ   | COAD | 0.233744213  |
| UCKL1 | Glycine, serine and threor | COAD | 0.093591906  |
| UCKL1 | Glycolysis / gluconeogene  | COAD | -0.013048752 |
| UCKL1 | Glycosaminoglycan biosy1   | COAD | 0.033822895  |
| UCKL1 | Glycosaminoglycan biosy1   | COAD | -0.013331946 |
| UCKL1 | Glycosaminoglycan biosy1   | COAD | -0.251357937 |
| UCKL1 | Glycosaminoglycan degra    | COAD | -0.041286106 |
| UCKL1 | Glycosphingolipid biosyn1  | COAD | -0.126509994 |
| UCKL1 | Glycosphingolipid biosyn1  | COAD | -0.090303399 |
| UCKL1 | Glycosphingolipid biosyn1  | COAD | -0.249082    |
| UCKL1 | Glycosylphosphatidylinos:  | COAD | -0.032832255 |
| UCKL1 | Glyoxylate and dicarboxy   | COAD | -0.004867693 |
| UCKL1 | Granulocyte                | COAD | -0.286185655 |
| UCKL1 | Hedgehog_signaling         | COAD | 0.048990634  |
| UCKL1 | Histidine metabolism       | COAD | -0.190800517 |
| UCKL1 | Hypoxia                    | COAD | -0.185285974 |
| UCKL1 | Il-17ralpha t cell         | COAD | -0.251644477 |
| UCKL1 | Il2_stat5_signaling        | COAD | -0.283971809 |
| UCKL1 | Il6_jak_stat3_signaling    | COAD | -0.30929886  |
| UCKL1 | Immune_checkpoints_tunr    | COAD | -0.30973891  |
| UCKL1 | Immune_inhibition_cytok    | COAD | -0.170191165 |
| UCKL1 | Inositol phosphate metabo  | COAD | -0.289052068 |
| UCKL1 | Interleukin_6_signaling    | COAD | -0.327092169 |
| UCKL1 | Jaeger_metastasis_up       | COAD | -0.289671181 |
| UCKL1 | Jain_nfkb_signaling        | COAD | 0.117051034  |
| UCKL1 | Kras_signaling_up          | COAD | -0.334426251 |
| UCKL1 | Linoleic acid metabolism   | COAD | 0.042922331  |
| UCKL1 | Lipoic acid metabolism     | COAD | -0.121309994 |
| UCKL1 | Lysine degradation         | COAD | 0.055982396  |
| UCKL1 | Lysosome                   | COAD | -0.114995365 |
| UCKL1 | M1 macrophage              | COAD | -0.332723657 |
| UCKL1 | M2 macrophage              | COAD | -0.373339736 |
| UCKL1 | Mannose type o-glycan bi   | COAD | 0.103127895  |
| UCKL1 | Mapk_signaling_pathway     | COAD | -0.197309691 |
| UCKL1 | Mapk3_erk1_activation      | COAD | -0.426273289 |
| UCKL1 | Marginal zone b cell       | COAD | -0.326773836 |

|       |                             |      |              |
|-------|-----------------------------|------|--------------|
| UCKL1 | Memory b cell               | COAD | -0.340430171 |
| UCKL1 | Mesenchymal cell            | COAD | -0.110328289 |
| UCKL1 | Mesenchymal stem cell       | COAD | -0.283897474 |
| UCKL1 | Metabolism of xenobiotic    | COAD | -0.115617954 |
| UCKL1 | Migrating cancer stem cel   | COAD | -0.246954646 |
| UCKL1 | Mitotic_spindle             | COAD | -0.19351169  |
| UCKL1 | Monocyte                    | COAD | -0.363055261 |
| UCKL1 | Mtor_signaling_pathway      | COAD | 0.013527532  |
| UCKL1 | Mtorc1_signaling            | COAD | -0.316286774 |
| UCKL1 | Mucin type o-glycan biosy   | COAD | -0.445674749 |
| UCKL1 | Myc_targets_v1              | COAD | -0.10858481  |
| UCKL1 | Myeloid cell                | COAD | -0.281702555 |
| UCKL1 | N-glycan biosynthesis       | COAD | -0.120583136 |
| UCKL1 | Naive b cell                | COAD | -0.087773336 |
| UCKL1 | Naive cd4+ t cell           | COAD | -0.190342904 |
| UCKL1 | Naive cd8+ t cell           | COAD | -0.068202372 |
| UCKL1 | Natural killer cell         | COAD | -0.30424148  |
| UCKL1 | Natural killer t (nkt) cell | COAD | -0.421312461 |
| UCKL1 | Natural regulatory t (treg) | COAD | -0.333650858 |
| UCKL1 | Neomycin, kanamycin and     | COAD | -0.030211473 |
| UCKL1 | Neutrophil                  | COAD | -0.319852191 |
| UCKL1 | Nicotinate and nicotinami   | COAD | -0.082789075 |
| UCKL1 | Nitrogen metabolism         | COAD | -0.320701622 |
| UCKL1 | Nod_like_receptor_signal    | COAD | -0.275626556 |
| UCKL1 | Notch_signaling             | COAD | -0.063322374 |
| UCKL1 | One carbon pool by folate   | COAD | -0.206398618 |
| UCKL1 | Other glycan degradation    | COAD | 0.196374647  |
| UCKL1 | Other types of o-glycan b   | COAD | 0.529872034  |
| UCKL1 | Oxidative phosphorylatio    | COAD | 0.011274434  |
| UCKL1 | P53_pathway                 | COAD | -0.143294564 |
| UCKL1 | P53_signaling_pathway       | COAD | -0.438195234 |
| UCKL1 | Pantothenate and coa bios   | COAD | -0.435520993 |
| UCKL1 | Pentose and glucuronate i   | COAD | -0.113289134 |
| UCKL1 | Pentose phosphate pathwa    | COAD | 0.110962193  |
| UCKL1 | Pericyte                    | COAD | -0.163145834 |
| UCKL1 | Phenylalanine metabolism    | COAD | -0.062699628 |
| UCKL1 | Phenylalanine, tyrosine ar  | COAD | -0.020220179 |
| UCKL1 | Phosphonate and phosphir    | COAD | -0.094526447 |
| UCKL1 | Pi3k_akt_activation         | COAD | -0.261933218 |
| UCKL1 | Pi3k_akt_mtor_signaling     | COAD | -0.299572263 |
| UCKL1 | Porphyrin and chlorophyl    | COAD | -0.134186726 |
| UCKL1 | Primary bile acid biosynt   | COAD | 0.17171663   |
| UCKL1 | Propanoate metabolism       | COAD | -0.278490913 |



|       |                            |      |              |
|-------|----------------------------|------|--------------|
| UCKL1 | Purine metabolism          | COAD | -0.024513511 |
| UCKL1 | Pyrimidine metabolism      | COAD | 0.094230747  |
| UCKL1 | Pyruvate metabolism        | COAD | -0.006983544 |
| UCKL1 | Regulation_of_autophagy    | COAD | -0.041615374 |
| UCKL1 | Retinol metabolism         | COAD | -0.14260829  |
| UCKL1 | Riboflavin metabolism      | COAD | 0.073654928  |
| UCKL1 | Schmahl_pdgf_signaling     | COAD | -0.441450521 |
| UCKL1 | Selenocompound metabol     | COAD | -0.088005388 |
| UCKL1 | Signaling_by_hippo         | COAD | -0.129848255 |
| UCKL1 | Sphingolipid metabolism    | COAD | -0.334326872 |
| UCKL1 | Starch and sucrose metabo  | COAD | -0.195606932 |
| UCKL1 | Steroid biosynthesis       | COAD | 0.170711714  |
| UCKL1 | Steroid hormone biosynth   | COAD | -0.059867245 |
| UCKL1 | Sulfur metabolism          | COAD | -0.226263476 |
| UCKL1 | Synthesis and degradation  | COAD | -0.105225914 |
| UCKL1 | T helper cell              | COAD | -0.28960537  |
| UCKL1 | T helper1 (th1) cell       | COAD | -0.299375441 |
| UCKL1 | T helper17 (th17) cell     | COAD | -0.241155036 |
| UCKL1 | T helper2 (th2) cell       | COAD | -0.23957467  |
| UCKL1 | T helper9 (th9) cell       | COAD | -0.178202936 |
| UCKL1 | Taurine and hypotaurine r  | COAD | 0.371374144  |
| UCKL1 | Terpenoid backbone biosy   | COAD | -0.276408161 |
| UCKL1 | Tgf_beta_signaling_pathw   | COAD | -0.237119651 |
| UCKL1 | Thiamine metabolism        | COAD | -0.046052571 |
| UCKL1 | Tnfa_signaling_via_nfb     | COAD | -0.277094602 |
| UCKL1 | Tryptophan metabolism      | COAD | -0.215239389 |
| UCKL1 | Tumor endothelial cell     | COAD | -0.05438912  |
| UCKL1 | Tyrosine metabolism        | COAD | 0.036822211  |
| UCKL1 | Ubiquinone and other ter   | COAD | -0.277136489 |
| UCKL1 | Valine, leucine and isoleu | COAD | -0.216909285 |
| UCKL1 | Valine, leucine and isoleu | COAD | -0.287271976 |
| UCKL1 | Vascular endothelial cell  | COAD | -0.005128287 |
| UCKL1 | Vascular smooth muscle c   | COAD | -0.009559067 |
| UCKL1 | Vegf_signaling_pathway     | COAD | -0.177526102 |
| UCKL1 | Vitamin b6 metabolism      | COAD | 0.119020909  |
| UCKL1 | Willert_wnt_signaling      | COAD | -0.089733298 |
| UCKL1 | Wnt_beta_catenin_signali   | COAD | 0.276827871  |
| UPP1  | Abnormal plasma cell       | COAD | -0.059262789 |
| UPP1  | Activated b cell           | COAD | 0.038081887  |
| UPP1  | Activated cd4+ t cell      | COAD | 0.21935721   |
| UPP1  | Activated t cell           | COAD | 0.213677779  |
| UPP1  | Alanine, aspartate and glu | COAD | -0.082849285 |
| UPP1  | Alcala_apoptosis           | COAD | 0.163849929  |

|      |                            |      |              |
|------|----------------------------|------|--------------|
| UPP1 | Alpha-linolenic acid meta  | COAD | 0.032992926  |
| UPP1 | Amino sugar and nucleoti   | COAD | 0.263200002  |
| UPP1 | Ampk_pathway               | COAD | 0.041885     |
| UPP1 | Angiogenesis               | COAD | 0.196817938  |
| UPP1 | Arachidonic acid metabol   | COAD | 0.251788204  |
| UPP1 | Arginine and proline metε  | COAD | 0.075559014  |
| UPP1 | Arginine biosynthesis      | COAD | 0.123642201  |
| UPP1 | Ascorbate and aldarate mε  | COAD | -0.093426426 |
| UPP1 | Atypical memory b cell     | COAD | -0.012630315 |
| UPP1 | Axl+siglec6+ dendritic ce  | COAD | 0.167011545  |
| UPP1 | B cell                     | COAD | 0.114366134  |
| UPP1 | B1 cell                    | COAD | -0.180692115 |
| UPP1 | Basal cell                 | COAD | 0.413181311  |
| UPP1 | Beta-alanine metabolism    | COAD | 0.071711571  |
| UPP1 | Biosynthesis of unsaturate | COAD | -0.033368015 |
| UPP1 | Biotin metabolism          | COAD | -0.069004226 |
| UPP1 | Butanoate metabolism       | COAD | -0.161222029 |
| UPP1 | Caffeine metabolism        | COAD | -0.002133286 |
| UPP1 | Cancer stem cell           | COAD | 0.105442275  |
| UPP1 | Cancer stem-like cell      | COAD | 0.0149559    |
| UPP1 | Cd4+ cytotoxic t cell      | COAD | 0.279767267  |
| UPP1 | Cd4+ memory t cell         | COAD | 0.123895194  |
| UPP1 | Cd4+ regulatory t cell     | COAD | 0.216417828  |
| UPP1 | Cd4+ t helper cell         | COAD | 0.205511382  |
| UPP1 | Cd4+cd25+ regulatory t c   | COAD | 0.210433275  |
| UPP1 | Cd8+ cytotoxic t cell      | COAD | 0.20638356   |
| UPP1 | Cd8+ regulatory t cell     | COAD | 0.191767903  |
| UPP1 | Cell_cycle                 | COAD | -0.13671051  |
| UPP1 | Chandran_metastasis_top5   | COAD | -0.348381463 |
| UPP1 | Citrate cycle (tca cycle)  | COAD | -0.010578699 |
| UPP1 | Cysteine and methionine r  | COAD | -0.077881826 |
| UPP1 | Cytokine induced killer α  | COAD | 0.127157338  |
| UPP1 | D-arginine and d-ornithin  | COAD | 0.193852648  |
| UPP1 | D-glutamine and d-glutan   | COAD | -0.01416857  |
| UPP1 | Dendritic cell             | COAD | 0.244178146  |
| UPP1 | Dna_repair                 | COAD | 0.059713797  |
| UPP1 | Dna_replication            | COAD | -0.052713624 |
| UPP1 | Double-negative memory     | COAD | 0.108262515  |
| UPP1 | Drug metabolism - cytoch   | COAD | 0.100969723  |
| UPP1 | Drug metabolism - other ε  | COAD | 0.18120358   |
| UPP1 | E2f_targets                | COAD | -0.164765931 |
| UPP1 | Ecm_receptor_interaction   | COAD | 0.094876009  |
| UPP1 | Effector cd4+ memory t (   | COAD | 0.146869143  |

|      |                              |      |              |
|------|------------------------------|------|--------------|
| UPP1 | Effector cd8+ memory t (     | COAD | 0.291421676  |
| UPP1 | Effector memory t cell       | COAD | 0.184891191  |
| UPP1 | Effector regulatory t (treg  | COAD | 0.185296483  |
| UPP1 | Elvidge_hif1a_targets_up     | COAD | -0.133010405 |
| UPP1 | Endothelial cell             | COAD | 0.09959327   |
| UPP1 | Eosinophil                   | COAD | 0.304577977  |
| UPP1 | Ether lipid metabolism       | COAD | 0.095793457  |
| UPP1 | Exhausted cd4+ t cell        | COAD | 0.267629531  |
| UPP1 | Exhausted cd8+ t cell        | COAD | 0.318000897  |
| UPP1 | Exhausted t cell             | COAD | 0.209786614  |
| UPP1 | Fat cell (adipocyte)         | COAD | 0.062253341  |
| UPP1 | Fatty acid biosynthesis      | COAD | -0.187405794 |
| UPP1 | Fatty acid degradation       | COAD | -0.085944653 |
| UPP1 | Fatty acid elongation        | COAD | 0.116130468  |
| UPP1 | Fibroblast                   | COAD | 0.139752797  |
| UPP1 | Folate biosynthesis          | COAD | 0.105065389  |
| UPP1 | Follicular b cell            | COAD | 0.179595552  |
| UPP1 | Follicular dendritic cell    | COAD | 0.070401286  |
| UPP1 | Follicular helper (tfh) t ce | COAD | 0.220685698  |
| UPP1 | Follicular t cell            | COAD | 0.171747526  |
| UPP1 | Foxp3+il-17+ t cell          | COAD | 0.064462638  |
| UPP1 | Fructose and mannose me      | COAD | 0.185887048  |
| UPP1 | G2m_checkpoint               | COAD | -0.213844681 |
| UPP1 | Galactose metabolism         | COAD | 0.225669555  |
| UPP1 | Galie_tumor_stemness_ge      | COAD | -0.04884169  |
| UPP1 | Glutathione metabolism       | COAD | 0.263614056  |
| UPP1 | Glycerolipid metabolism      | COAD | 0.03340979   |
| UPP1 | Glycerophospholipid met&     | COAD | 0.136641733  |
| UPP1 | Glycine, serine and threor   | COAD | 0.150156517  |
| UPP1 | Glycolysis / gluconeogene    | COAD | 0.105432518  |
| UPP1 | Glycosaminoglycan biosy      | COAD | 0.27974307   |
| UPP1 | Glycosaminoglycan biosy      | COAD | 0.057837072  |
| UPP1 | Glycosaminoglycan biosy      | COAD | 0.38068651   |
| UPP1 | Glycosaminoglycan degra      | COAD | 0.2349204    |
| UPP1 | Glycosphingolipid biosyn     | COAD | 0.29447676   |
| UPP1 | Glycosphingolipid biosyn     | COAD | 0.3295684    |
| UPP1 | Glycosphingolipid biosyn     | COAD | 0.26818064   |
| UPP1 | Glycosylphosphatidylinos:    | COAD | -0.194409557 |
| UPP1 | Glyoxylate and dicarboxy     | COAD | -0.064158945 |
| UPP1 | Granulocyte                  | COAD | 0.253861458  |
| UPP1 | Hedgehog_signaling           | COAD | -0.094569645 |
| UPP1 | Histidine metabolism         | COAD | 0.080176863  |
| UPP1 | Hypoxia                      | COAD | 0.329277531  |

|      |                             |      |              |
|------|-----------------------------|------|--------------|
| UPP1 | Il-17alpha t cell           | COAD | 0.189711263  |
| UPP1 | Il2_stat5_signaling         | COAD | 0.287928185  |
| UPP1 | Il6_jak_stat3_signaling     | COAD | 0.359784864  |
| UPP1 | Immune_checkpoints_tur      | COAD | 0.295963404  |
| UPP1 | Immune_inhibition_cytok     | COAD | 0.399248157  |
| UPP1 | Inositol phosphate metabo   | COAD | -0.113807589 |
| UPP1 | Interleukin_6_signaling     | COAD | 0.154280437  |
| UPP1 | Jaeger_metastasis_up        | COAD | 0.045877968  |
| UPP1 | Jain_nfkb_signaling         | COAD | -0.282143504 |
| UPP1 | Kras_signaling_up           | COAD | 0.215605852  |
| UPP1 | Linoleic acid metabolism    | COAD | 0.002775237  |
| UPP1 | Lipoic acid metabolism      | COAD | -0.116944339 |
| UPP1 | Lysine degradation          | COAD | -0.342622684 |
| UPP1 | Lysosome                    | COAD | 0.343362701  |
| UPP1 | M1 macrophage               | COAD | 0.268411388  |
| UPP1 | M2 macrophage               | COAD | 0.283892694  |
| UPP1 | Mannose type o-glycan bi    | COAD | -0.049029412 |
| UPP1 | Mapk_signaling_pathway      | COAD | 0.195916373  |
| UPP1 | Mapk3_erk1_activation       | COAD | 0.187590037  |
| UPP1 | Marginal zone b cell        | COAD | 0.091940782  |
| UPP1 | Memory b cell               | COAD | 0.074782301  |
| UPP1 | Mesenchymal cell            | COAD | 0.242991686  |
| UPP1 | Mesenchymal stem cell       | COAD | 0.167611803  |
| UPP1 | Metabolism of xenobiotic    | COAD | 0.165418002  |
| UPP1 | Migrating cancer stem cel   | COAD | 0.067753268  |
| UPP1 | Mitotic_spindle             | COAD | -0.17793209  |
| UPP1 | Monocyte                    | COAD | 0.399097291  |
| UPP1 | Mtor_signaling_pathway      | COAD | -0.022454655 |
| UPP1 | Mtorc1_signaling            | COAD | 0.101924887  |
| UPP1 | Mucin type o-glycan biosy   | COAD | -0.008888374 |
| UPP1 | Myc_targets_v1              | COAD | -0.16394517  |
| UPP1 | Myeloid cell                | COAD | 0.221986644  |
| UPP1 | N-glycan biosynthesis       | COAD | -0.026035216 |
| UPP1 | Naive b cell                | COAD | 0.066809782  |
| UPP1 | Naive cd4+ t cell           | COAD | -0.025599373 |
| UPP1 | Naive cd8+ t cell           | COAD | -0.226864731 |
| UPP1 | Natural killer cell         | COAD | 0.270117471  |
| UPP1 | Natural killer t (nkt) cell | COAD | 0.029587964  |
| UPP1 | Natural regulatory t (treg) | COAD | 0.186663214  |
| UPP1 | Neomycin, kanamycin and     | COAD | 0.226294302  |
| UPP1 | Neutrophil                  | COAD | 0.365621608  |
| UPP1 | Nicotinate and nicotinami   | COAD | 0.071779371  |
| UPP1 | Nitrogen metabolism         | COAD | 0.182983739  |

|      |                                 |              |
|------|---------------------------------|--------------|
| UPP1 | Nod_like_receptor_signal: COAD  | 0.280795472  |
| UPP1 | Notch_signaling COAD            | 0.023220111  |
| UPP1 | One carbon pool by folate COAD  | -0.104165487 |
| UPP1 | Other glycan degradation COAD   | -0.008588861 |
| UPP1 | Other types of o-glycan b: COAD | -0.052252655 |
| UPP1 | Oxidative phosphorylation COAD  | 0.199481941  |
| UPP1 | P53_pathway COAD                | 0.291847498  |
| UPP1 | P53_signaling_pathway COAD      | 0.019059177  |
| UPP1 | Pantothenate and coa bios COAD  | 0.224148909  |
| UPP1 | Pentose and glucuronate in COAD | -0.071839898 |
| UPP1 | Pentose phosphate pathway COAD  | 0.053867493  |
| UPP1 | Pericyte COAD                   | 0.117437259  |
| UPP1 | Phenylalanine metabolism COAD   | 0.21098694   |
| UPP1 | Phenylalanine, tyrosine ar COAD | 0.076835623  |
| UPP1 | Phosphonate and phosphir COAD   | -0.050072903 |
| UPP1 | Pi3k_akt_activation COAD        | 0.014679674  |
| UPP1 | Pi3k_akt_mtor_signaling COAD    | 0.178628159  |
| UPP1 | Porphyrin and chlorophyl COAD   | 0.171545449  |
| UPP1 | Primary bile acid biosynt# COAD | -0.09358614  |
| UPP1 | Propanoate metabolism COAD      | -0.277726494 |
| UPP1 | Purine metabolism COAD          | 0.012026203  |
| UPP1 | Pyrimidine metabolism COAD      | 0.017831552  |
| UPP1 | Pyruvate metabolism COAD        | -0.116318467 |
| UPP1 | Regulation_of_autophagy COAD    | 0.186038399  |
| UPP1 | Retinol metabolism COAD         | 0.071619652  |
| UPP1 | Riboflavin metabolism COAD      | 0.159222908  |
| UPP1 | Schmahl_pdgf_signaling COAD     | 0.124429868  |
| UPP1 | Selenocompound metabol COAD     | -0.144390097 |
| UPP1 | Signaling_by_hippo COAD         | -0.164058317 |
| UPP1 | Sphingolipid metabolism COAD    | 0.234527321  |
| UPP1 | Starch and sucrose metabo COAD  | -0.017622966 |
| UPP1 | Steroid biosynthesis COAD       | -0.083302342 |
| UPP1 | Steroid hormone biosynth COAD   | 0.101923345  |
| UPP1 | Sulfur metabolism COAD          | 0.005003881  |
| UPP1 | Synthesis and degradation COAD  | -0.186368727 |
| UPP1 | T helper cell COAD              | 0.215959853  |
| UPP1 | T helper1 (th1) cell COAD       | 0.283205284  |
| UPP1 | T helper17 (th17) cell COAD     | 0.293781177  |
| UPP1 | T helper2 (th2) cell COAD       | 0.254336761  |
| UPP1 | T helper9 (th9) cell COAD       | 0.274498435  |
| UPP1 | Taurine and hypotaurine r COAD  | -0.012091241 |
| UPP1 | Terpenoid backbone biosy COAD   | -0.053896025 |
| UPP1 | Tgf_beta_signaling_pathw COAD   | -0.146739333 |

|      |                            |      |              |
|------|----------------------------|------|--------------|
| UPP1 | Thiamine metabolism        | COAD | 0.19706298   |
| UPP1 | Tnfa_signaling_via_nfk     | COAD | 0.394957263  |
| UPP1 | Tryptophan metabolism      | COAD | 0.114896914  |
| UPP1 | Tumor endothelial cell     | COAD | 0.173723354  |
| UPP1 | Tyrosine metabolism        | COAD | 0.129195803  |
| UPP1 | Ubiquinone and other ter   | COAD | 0.119778485  |
| UPP1 | Valine, leucine and isoleu | COAD | 0.348785488  |
| UPP1 | Valine, leucine and isoleu | COAD | -0.115442443 |
| UPP1 | Vascular endothelial cell  | COAD | 0.134375902  |
| UPP1 | Vascular smooth muscle c   | COAD | 0.000827904  |
| UPP1 | Vegf_signaling_pathway     | COAD | 0.282236973  |
| UPP1 | Vitamin b6 metabolism      | COAD | -0.018324921 |
| UPP1 | Willert_wnt_signaling      | COAD | -0.065543616 |
| UPP1 | Wnt_beta_catenin_signali   | COAD | -0.274234295 |
| UPP2 | Abnormal plasma cell       | COAD | 0.138380783  |
| UPP2 | Activated b cell           | COAD | 0.108113069  |
| UPP2 | Activated cd4+ t cell      | COAD | 0.049945099  |
| UPP2 | Activated t cell           | COAD | 0.129798557  |
| UPP2 | Alanine, aspartate and glu | COAD | 0.028219415  |
| UPP2 | Alcala_apoptosis           | COAD | 0.13061939   |
| UPP2 | Alpha-linolenic acid meta  | COAD | -0.085174712 |
| UPP2 | Amino sugar and nucleoti   | COAD | 0.004684444  |
| UPP2 | Ampk_pathway               | COAD | 0.136105799  |
| UPP2 | Angiogenesis               | COAD | 0.059811133  |
| UPP2 | Arachidonic acid metabol   | COAD | -0.043262543 |
| UPP2 | Arginine and proline met   | COAD | 0.104506019  |
| UPP2 | Arginine biosynthesis      | COAD | 0.042459287  |
| UPP2 | Ascorbate and aldarate m   | COAD | 0.021381097  |
| UPP2 | Atypical memory b cell     | COAD | 0.133518118  |
| UPP2 | Axl+siglec6+ dendritic ce  | COAD | 0.100355063  |
| UPP2 | B cell                     | COAD | 0.164659486  |
| UPP2 | B1 cell                    | COAD | 0.087700061  |
| UPP2 | Basal cell                 | COAD | 0.028836246  |
| UPP2 | Beta-alanine metabolism    | COAD | 0.051002934  |
| UPP2 | Biosynthesis of unsaturate | COAD | -0.025582898 |
| UPP2 | Biotin metabolism          | COAD | 0.045684373  |
| UPP2 | Butanoate metabolism       | COAD | -0.027518396 |
| UPP2 | Caffeine metabolism        | COAD | 0.02113457   |
| UPP2 | Cancer stem cell           | COAD | 0.079251899  |
| UPP2 | Cancer stem-like cell      | COAD | -0.061972639 |
| UPP2 | Cd4+ cytotoxic t cell      | COAD | 0.115709376  |
| UPP2 | Cd4+ memory t cell         | COAD | 0.116364144  |
| UPP2 | Cd4+ regulatory t cell     | COAD | 0.058140395  |

|      |                              |      |              |
|------|------------------------------|------|--------------|
| UPP2 | Cd4+ t helper cell           | COAD | 0.086050888  |
| UPP2 | Cd4+cd25+ regulatory t c     | COAD | 0.089714408  |
| UPP2 | Cd8+ cytotoxic t cell        | COAD | 0.147509611  |
| UPP2 | Cd8+ regulatory t cell       | COAD | 0.159627862  |
| UPP2 | Cell_cycle                   | COAD | 0.160722879  |
| UPP2 | Chandran_metastasis_top5     | COAD | 0.158134062  |
| UPP2 | Citrate cycle (tca cycle)    | COAD | 0.003437047  |
| UPP2 | Cysteine and methionine r    | COAD | 0.107717561  |
| UPP2 | Cytokine induced killer c    | COAD | 0.171055953  |
| UPP2 | D-arginine and d-ornithin    | COAD | 0.12929014   |
| UPP2 | D-glutamine and d-glutan     | COAD | -0.003922978 |
| UPP2 | Dendritic cell               | COAD | 0.082118828  |
| UPP2 | Dna_repair                   | COAD | 0.08526917   |
| UPP2 | Dna_replication              | COAD | 0.076254467  |
| UPP2 | Double-negative memory       | COAD | 0.088765344  |
| UPP2 | Drug metabolism - cytoch     | COAD | 0.056669633  |
| UPP2 | Drug metabolism - other c    | COAD | 0.024299503  |
| UPP2 | E2f_targets                  | COAD | 0.069946053  |
| UPP2 | Ecm_receptor_interaction     | COAD | 0.097646376  |
| UPP2 | Effector cd4+ memory t (     | COAD | 0.070130081  |
| UPP2 | Effector cd8+ memory t (     | COAD | 0.082364579  |
| UPP2 | Effector memory t cell       | COAD | 0.092823632  |
| UPP2 | Effector regulatory t (treg  | COAD | 0.011958398  |
| UPP2 | Elvidge_hif1a_targets_up     | COAD | 0.04701651   |
| UPP2 | Endothelial cell             | COAD | 0.10265473   |
| UPP2 | Eosinophil                   | COAD | 0.033086987  |
| UPP2 | Ether lipid metabolism       | COAD | -0.008542538 |
| UPP2 | Exhausted cd4+ t cell        | COAD | 0.12399843   |
| UPP2 | Exhausted cd8+ t cell        | COAD | 0.104615508  |
| UPP2 | Exhausted t cell             | COAD | 0.154800003  |
| UPP2 | Fat cell (adipocyte)         | COAD | 0.073232522  |
| UPP2 | Fatty acid biosynthesis      | COAD | 0.085296356  |
| UPP2 | Fatty acid degradation       | COAD | 0.021903338  |
| UPP2 | Fatty acid elongation        | COAD | 0.094590792  |
| UPP2 | Fibroblast                   | COAD | 0.051468482  |
| UPP2 | Folate biosynthesis          | COAD | 0.029252376  |
| UPP2 | Follicular b cell            | COAD | 0.124221504  |
| UPP2 | Follicular dendritic cell    | COAD | 0.151485748  |
| UPP2 | Follicular helper (tfh) t ce | COAD | 0.09721763   |
| UPP2 | Follicular t cell            | COAD | 0.150404168  |
| UPP2 | Foxp3+il-17+ t cell          | COAD | 0.169342523  |
| UPP2 | Fructose and mannose me      | COAD | -0.0225659   |
| UPP2 | G2m_checkpoint               | COAD | 0.121579912  |

|      |                            |      |              |
|------|----------------------------|------|--------------|
| UPP2 | Galactose metabolism       | COAD | -0.004548871 |
| UPP2 | Galie_tumor_stemness_ge    | COAD | 0.111548756  |
| UPP2 | Glutathione metabolism     | COAD | -0.06637703  |
| UPP2 | Glycerolipid metabolism    | COAD | 0.039122248  |
| UPP2 | Glycerophospholipid metæ   | COAD | -0.018450102 |
| UPP2 | Glycine, serine and threor | COAD | 0.094679362  |
| UPP2 | Glycolysis / gluconeogene  | COAD | 0.025922619  |
| UPP2 | Glycosaminoglycan biosy1   | COAD | -0.015651046 |
| UPP2 | Glycosaminoglycan biosy1   | COAD | 0.017616058  |
| UPP2 | Glycosaminoglycan biosy1   | COAD | 0.014693793  |
| UPP2 | Glycosaminoglycan degra    | COAD | -0.047950765 |
| UPP2 | Glycosphingolipid biosyn1  | COAD | -0.024812073 |
| UPP2 | Glycosphingolipid biosyn1  | COAD | -0.056387979 |
| UPP2 | Glycosphingolipid biosyn1  | COAD | -0.03884074  |
| UPP2 | Glycosylphosphatidylinos:  | COAD | -0.02926858  |
| UPP2 | Glyoxylate and dicarboxy   | COAD | 0.003456355  |
| UPP2 | Granulocyte                | COAD | 0.02938993   |
| UPP2 | Hedgehog_signaling         | COAD | 0.065174697  |
| UPP2 | Histidine metabolism       | COAD | 0.213562267  |
| UPP2 | Hypoxia                    | COAD | 0.033200776  |
| UPP2 | Il-17ralpha t cell         | COAD | 0.146240724  |
| UPP2 | Il2_stat5_signaling        | COAD | 0.075662764  |
| UPP2 | Il6_jak_stat3_signaling    | COAD | -0.002173857 |
| UPP2 | Immune_checkpoints_tunr    | COAD | 0.01876346   |
| UPP2 | Immune_inhibition_cytok    | COAD | -0.114626335 |
| UPP2 | Inositol phosphate metabo  | COAD | 0.120978235  |
| UPP2 | Interleukin_6_signaling    | COAD | 0.02544522   |
| UPP2 | Jaeger_metastasis_up       | COAD | 0.113734501  |
| UPP2 | Jain_nfkb_signaling        | COAD | 0.151793122  |
| UPP2 | Kras_signaling_up          | COAD | 0.123913727  |
| UPP2 | Linoleic acid metabolism   | COAD | -0.008027026 |
| UPP2 | Lipoic acid metabolism     | COAD | 0.015195859  |
| UPP2 | Lysine degradation         | COAD | 0.174276548  |
| UPP2 | Lysosome                   | COAD | 0.023164429  |
| UPP2 | M1 macrophage              | COAD | 0.073600603  |
| UPP2 | M2 macrophage              | COAD | 0.023638158  |
| UPP2 | Mannose type o-glycan bi   | COAD | -0.005240172 |
| UPP2 | Mapk_signaling_pathway     | COAD | 0.075720657  |
| UPP2 | Mapk3_erk1_activation      | COAD | 0.048467324  |
| UPP2 | Marginal zone b cell       | COAD | 0.168791442  |
| UPP2 | Memory b cell              | COAD | 0.154504665  |
| UPP2 | Mesenchymal cell           | COAD | 0.012104094  |
| UPP2 | Mesenchymal stem cell      | COAD | 0.019335519  |



|      |                             |      |              |
|------|-----------------------------|------|--------------|
| UPP2 | Metabolism of xenobiotic    | COAD | 0.001225451  |
| UPP2 | Migrating cancer stem cel   | COAD | 0.096875252  |
| UPP2 | Mitotic_spindle             | COAD | 0.17249382   |
| UPP2 | Monocyte                    | COAD | 0.053165802  |
| UPP2 | Mtor_signaling_pathway      | COAD | 0.075468894  |
| UPP2 | Mtorc1_signaling            | COAD | 0.052285672  |
| UPP2 | Mucin type o-glycan bios    | COAD | 0.041330469  |
| UPP2 | Myc_targets_v1              | COAD | 0.079048694  |
| UPP2 | Myeloid cell                | COAD | 0.090142227  |
| UPP2 | N-glycan biosynthesis       | COAD | -0.032620858 |
| UPP2 | Naive b cell                | COAD | 0.098467103  |
| UPP2 | Naive cd4+ t cell           | COAD | 0.134950983  |
| UPP2 | Naive cd8+ t cell           | COAD | 0.23699386   |
| UPP2 | Natural killer cell         | COAD | 0.125258308  |
| UPP2 | Natural killer t (nkt) cell | COAD | 0.195166192  |
| UPP2 | Natural regulatory t (treg) | COAD | 0.113400494  |
| UPP2 | Neomycin, kanamycin an      | COAD | 0.094944521  |
| UPP2 | Neutrophil                  | COAD | 0.019508211  |
| UPP2 | Nicotinate and nicotinami   | COAD | 0.117734509  |
| UPP2 | Nitrogen metabolism         | COAD | -0.025295442 |
| UPP2 | Nod_like_receptor_signal    | COAD | 0.019568176  |
| UPP2 | Notch_signaling             | COAD | 0.157747238  |
| UPP2 | One carbon pool by folate   | COAD | 0.025279637  |
| UPP2 | Other glycan degradation    | COAD | 0.00365497   |
| UPP2 | Other types of o-glycan b   | COAD | 0.138660559  |
| UPP2 | Oxidative phosphorylatio    | COAD | 0.000161977  |
| UPP2 | P53_pathway                 | COAD | 0.140738514  |
| UPP2 | P53_signaling_pathway       | COAD | 0.080351335  |
| UPP2 | Pantothenate and coa bios   | COAD | -0.055131394 |
| UPP2 | Pentose and glucuronate i   | COAD | 0.003765365  |
| UPP2 | Pentose phosphate pathwa    | COAD | 0.025593062  |
| UPP2 | Pericyte                    | COAD | 0.035081921  |
| UPP2 | Phenylalanine metabolism    | COAD | 0.09289806   |
| UPP2 | Phenylalanine, tyrosine ar  | COAD | 0.003323938  |
| UPP2 | Phosphonate and phosphir    | COAD | -0.028115795 |
| UPP2 | Pi3k_akt_activation         | COAD | 0.10050705   |
| UPP2 | Pi3k_akt_mtor_signaling     | COAD | 0.09370982   |
| UPP2 | Porphyrin and chlorophyl    | COAD | -0.012151924 |
| UPP2 | Primary bile acid biosynt   | COAD | 0.088696306  |
| UPP2 | Propanoate metabolism       | COAD | 0.046197885  |
| UPP2 | Purine metabolism           | COAD | 0.055171791  |
| UPP2 | Pyrimidine metabolism       | COAD | 0.100800072  |
| UPP2 | Pyruvate metabolism         | COAD | 0.023348639  |

|      |                                    |      |              |
|------|------------------------------------|------|--------------|
| UPP2 | Regulation_of_autophagy            | COAD | -0.250248771 |
| UPP2 | Retinol metabolism                 | COAD | -0.015594172 |
| UPP2 | Riboflavin metabolism              | COAD | 0.115736621  |
| UPP2 | Schmahl_pdgf_signaling             | COAD | 0.036289033  |
| UPP2 | Selenocompound metabolism          | COAD | 0.078704826  |
| UPP2 | Signaling_by_hippo                 | COAD | 0.063920063  |
| UPP2 | Sphingolipid metabolism            | COAD | -0.082874253 |
| UPP2 | Starch and sucrose metabolism      | COAD | 0.067695937  |
| UPP2 | Steroid biosynthesis               | COAD | -0.042666663 |
| UPP2 | Steroid hormone biosynthesis       | COAD | 0.066484144  |
| UPP2 | Sulfur metabolism                  | COAD | 0.033948191  |
| UPP2 | Synthesis and degradation          | COAD | 0.063608106  |
| UPP2 | T helper cell                      | COAD | 0.124153406  |
| UPP2 | T helper1 (th1) cell               | COAD | 0.152009971  |
| UPP2 | T helper17 (th17) cell             | COAD | -0.004250819 |
| UPP2 | T helper2 (th2) cell               | COAD | 0.057664213  |
| UPP2 | T helper9 (th9) cell               | COAD | -0.057050113 |
| UPP2 | Taurine and hypotaurine metabolism | COAD | -0.039813784 |
| UPP2 | Terpenoid backbone biosynthesis    | COAD | -0.012809852 |
| UPP2 | Tgf_beta_signaling_pathway         | COAD | 0.139496517  |
| UPP2 | Thiamine metabolism                | COAD | 0.011483809  |
| UPP2 | Tnfa_signaling_via_nfkB            | COAD | 0.040312703  |
| UPP2 | Tryptophan metabolism              | COAD | 0.028573538  |
| UPP2 | Tumor endothelial cell             | COAD | 0.077746236  |
| UPP2 | Tyrosine metabolism                | COAD | 0.061073744  |
| UPP2 | Ubiquinone and other terpenoids    | COAD | -0.013061366 |
| UPP2 | Valine, leucine and isoleucine     | COAD | -0.034388311 |
| UPP2 | Valine, leucine and isoleucine     | COAD | -0.004016311 |
| UPP2 | Vascular endothelial cell          | COAD | 0.006771366  |
| UPP2 | Vascular smooth muscle cell        | COAD | -0.005291015 |
| UPP2 | Vegf_signaling_pathway             | COAD | 0.008998672  |
| UPP2 | Vitamin b6 metabolism              | COAD | 0.024929194  |
| UPP2 | Willert_wnt_signaling              | COAD | 0.073373477  |
| UPP2 | Wnt_beta_catenin_signaling         | COAD | 0.16399013   |
| CDA  | Abnormal plasma cell               | DLBC | 0.078775448  |
| CDA  | Activated b cell                   | DLBC | 0.245617552  |
| CDA  | Activated cd4+ t cell              | DLBC | 0.189499156  |
| CDA  | Activated t cell                   | DLBC | 0.351267257  |
| CDA  | Alanine, aspartate and glutamate   | DLBC | -0.113981356 |
| CDA  | Alcalal apoptosis                  | DLBC | 0.085192039  |
| CDA  | Alpha-linolenic acid metabolism    | DLBC | 0.394634668  |
| CDA  | Amino sugar and nucleotide         | DLBC | 0.372606134  |
| CDA  | Ampk_pathway                       | DLBC | -0.579202889 |

|     |                                         |      |              |
|-----|-----------------------------------------|------|--------------|
| CDA | Angiogenesis                            | DLBC | 0.308358643  |
| CDA | Arachidonic acid metabolism             | DLBC | 0.371512965  |
| CDA | Arginine and proline metabolism         | DLBC | 0.218813463  |
| CDA | Arginine biosynthesis                   | DLBC | 0.182196169  |
| CDA | Ascorbate and aldarate metabolism       | DLBC | 0.027977755  |
| CDA | Atypical memory b cell                  | DLBC | -0.080802848 |
| CDA | Axl+siglec6+ dendritic cell             | DLBC | 0.515239127  |
| CDA | B cell                                  | DLBC | -0.428725906 |
| CDA | B1 cell                                 | DLBC | 0.281863468  |
| CDA | Basal cell                              | DLBC | 0.42732566   |
| CDA | Beta-alanine metabolism                 | DLBC | 0.136858071  |
| CDA | Biosynthesis of unsaturated fatty acids | DLBC | 0.348912919  |
| CDA | Biotin metabolism                       | DLBC | -0.113573813 |
| CDA | Butanoate metabolism                    | DLBC | -0.091933922 |
| CDA | Caffeine metabolism                     | DLBC | 0.182678885  |
| CDA | Cancer stem cell                        | DLBC | 0.455061901  |
| CDA | Cancer stem-like cell                   | DLBC | 0.316759727  |
| CDA | Cd4+ cytotoxic t cell                   | DLBC | 0.451806862  |
| CDA | Cd4+ memory t cell                      | DLBC | 0.091453599  |
| CDA | Cd4+ regulatory t cell                  | DLBC | 0.1071275    |
| CDA | Cd4+ t helper cell                      | DLBC | 0.291341103  |
| CDA | Cd4+cd25+ regulatory t cell             | DLBC | 0.215072669  |
| CDA | Cd8+ cytotoxic t cell                   | DLBC | 0.354120286  |
| CDA | Cd8+ regulatory t cell                  | DLBC | 0.236129142  |
| CDA | Cell cycle                              | DLBC | -0.291523318 |
| CDA | Chandran_metastasis_top5                | DLBC | -0.316482281 |
| CDA | Citrate cycle (tca cycle)               | DLBC | -0.033299059 |
| CDA | Cysteine and methionine metabolism      | DLBC | -0.098525663 |
| CDA | Cytokine induced killer cell            | DLBC | 0.218530232  |
| CDA | D-arginine and d-ornithine              | DLBC | 0.178585764  |
| CDA | D-glutamine and d-glutamate             | DLBC | -0.122485996 |
| CDA | Dendritic cell                          | DLBC | 0.523345517  |
| CDA | Dna_repair                              | DLBC | -0.100449965 |
| CDA | Dna_replication                         | DLBC | -0.331314375 |
| CDA | Double-negative memory t cell           | DLBC | -0.109290878 |
| CDA | Drug metabolism - cytochrome p450       | DLBC | 0.209553116  |
| CDA | Drug metabolism - other                 | DLBC | 0.224479807  |
| CDA | E2f_targets                             | DLBC | -0.342843604 |
| CDA | Ecm_receptor_interaction                | DLBC | 0.161693022  |
| CDA | Effector cd4+ memory t cell             | DLBC | 0.007013921  |
| CDA | Effector cd8+ memory t cell             | DLBC | 0.379794626  |
| CDA | Effector memory t cell                  | DLBC | 0.279402741  |
| CDA | Effector regulatory t cell (treg)       | DLBC | -0.053430681 |

|     |                                |      |              |
|-----|--------------------------------|------|--------------|
| CDA | Elvidge_hif1a_targets_up       | DLBC | -0.021039842 |
| CDA | Endothelial cell               | DLBC | 0.160025347  |
| CDA | Eosinophil                     | DLBC | 0.619002896  |
| CDA | Ether lipid metabolism         | DLBC | 0.3926222    |
| CDA | Exhausted cd4+ t cell          | DLBC | 0.447691377  |
| CDA | Exhausted cd8+ t cell          | DLBC | 0.371169492  |
| CDA | Exhausted t cell               | DLBC | 0.307442954  |
| CDA | Fat cell (adipocyte)           | DLBC | 0.260607194  |
| CDA | Fatty acid biosynthesis        | DLBC | -0.131933498 |
| CDA | Fatty acid degradation         | DLBC | 0.12539675   |
| CDA | Fatty acid elongation          | DLBC | -0.012652267 |
| CDA | Fibroblast                     | DLBC | 0.374922081  |
| CDA | Folate biosynthesis            | DLBC | 0.100717302  |
| CDA | Follicular b cell              | DLBC | -0.057648098 |
| CDA | Follicular dendritic cell      | DLBC | -0.002565382 |
| CDA | Follicular helper (tfh) t cell | DLBC | 0.38163299   |
| CDA | Follicular t cell              | DLBC | 0.188930632  |
| CDA | Foxp3+il-17+ t cell            | DLBC | 0.260120344  |
| CDA | Fructose and mannose me        | DLBC | 0.175536092  |
| CDA | G2m_checkpoint                 | DLBC | -0.317698849 |
| CDA | Galactose metabolism           | DLBC | 0.343053591  |
| CDA | Galie_tumor_stemness_ge        | DLBC | -0.017350093 |
| CDA | Glutathione metabolism         | DLBC | 0.321008322  |
| CDA | Glycerolipid metabolism        | DLBC | 0.447081734  |
| CDA | Glycerophospholipid met        | DLBC | 0.348318841  |
| CDA | Glycine, serine and threor     | DLBC | 0.071808449  |
| CDA | Glycolysis / gluconeogene      | DLBC | 0.243633943  |
| CDA | Glycosaminoglycan biosyn       | DLBC | 0.550968573  |
| CDA | Glycosaminoglycan biosyn       | DLBC | 0.530885627  |
| CDA | Glycosaminoglycan biosyn       | DLBC | 0.109086105  |
| CDA | Glycosaminoglycan degra        | DLBC | 0.641120605  |
| CDA | Glycosphingolipid biosyn       | DLBC | 0.597708743  |
| CDA | Glycosphingolipid biosyn       | DLBC | 0.692423408  |
| CDA | Glycosphingolipid biosyn       | DLBC | 0.320724738  |
| CDA | Glycosylphosphatidylinos       | DLBC | -0.261604787 |
| CDA | Glyoxylate and dicarboxy       | DLBC | -0.088898091 |
| CDA | Granulocyte                    | DLBC | 0.640502998  |
| CDA | Hedgehog_signaling             | DLBC | 0.101144942  |
| CDA | Histidine metabolism           | DLBC | 0.441848367  |
| CDA | Hypoxia                        | DLBC | 0.498917361  |
| CDA | Il-17ralpha t cell             | DLBC | 0.327133287  |
| CDA | Il2_stat5_signaling            | DLBC | 0.570875322  |
| CDA | Il6_jak_stat3_signaling        | DLBC | 0.493384889  |

|     |                             |      |              |
|-----|-----------------------------|------|--------------|
| CDA | Immune_checkpoints_tur      | DLBC | 0.481079284  |
| CDA | Immune_inhibition_cytok     | DLBC | 0.566672752  |
| CDA | Inositol phosphate metabo   | DLBC | 0.020506071  |
| CDA | Interleukin_6_signaling     | DLBC | 0.098629062  |
| CDA | Jaeger_metastasis_up        | DLBC | -0.070286793 |
| CDA | Jain_nfkb_signaling         | DLBC | -0.252016291 |
| CDA | Kras_signaling_up           | DLBC | 0.495703175  |
| CDA | Linoleic acid metabolism    | DLBC | 0.188805477  |
| CDA | Lipoic acid metabolism      | DLBC | -0.230163349 |
| CDA | Lysine degradation          | DLBC | -0.199703484 |
| CDA | Lysosome                    | DLBC | 0.690316237  |
| CDA | M1 macrophage               | DLBC | 0.461375979  |
| CDA | M2 macrophage               | DLBC | 0.299861068  |
| CDA | Mannose type o-glycan bi    | DLBC | -0.016275346 |
| CDA | Mapk_signaling_pathway      | DLBC | 0.135531465  |
| CDA | Mapk3_erk1_activation       | DLBC | -0.005852225 |
| CDA | Marginal zone b cell        | DLBC | -0.129382947 |
| CDA | Memory b cell               | DLBC | 0.159941165  |
| CDA | Mesenchymal cell            | DLBC | 0.4492945    |
| CDA | Mesenchymal stem cell       | DLBC | 0.45434704   |
| CDA | Metabolism of xenobiotic    | DLBC | 0.264656368  |
| CDA | Migrating cancer stem cel   | DLBC | 0.294425414  |
| CDA | Mitotic_spindle             | DLBC | -0.277890011 |
| CDA | Monocyte                    | DLBC | 0.716763996  |
| CDA | Mtor_signaling_pathway      | DLBC | -0.092845666 |
| CDA | Mtorc1_signaling            | DLBC | 0.11762548   |
| CDA | Mucin type o-glycan biosy   | DLBC | 0.293656535  |
| CDA | Myc_targets_v1              | DLBC | -0.314409913 |
| CDA | Myeloid cell                | DLBC | 0.462161206  |
| CDA | N-glycan biosynthesis       | DLBC | -0.058702637 |
| CDA | Naive b cell                | DLBC | -0.173748504 |
| CDA | Naive cd4+ t cell           | DLBC | 0.178040454  |
| CDA | Naive cd8+ t cell           | DLBC | 0.025660127  |
| CDA | Natural killer cell         | DLBC | 0.413450958  |
| CDA | Natural killer t (nkt) cell | DLBC | -0.054223861 |
| CDA | Natural regulatory t (treg) | DLBC | 0.243870971  |
| CDA | Neomycin, kanamycin and     | DLBC | 0.54597143   |
| CDA | Neutrophil                  | DLBC | 0.715008346  |
| CDA | Nicotinate and nicotinami   | DLBC | 0.46290584   |
| CDA | Nitrogen metabolism         | DLBC | 0.152044936  |
| CDA | Nod_like_receptor_signal    | DLBC | 0.296417936  |
| CDA | Notch_signaling             | DLBC | 0.503955258  |
| CDA | One carbon pool by folate   | DLBC | -0.358458241 |

|     |                            |      |              |
|-----|----------------------------|------|--------------|
| CDA | Other glycan degradation   | DLBC | 0.640634174  |
| CDA | Other types of o-glycan b  | DLBC | -0.030862804 |
| CDA | Oxidative phosphorylatior  | DLBC | 0.096200968  |
| CDA | P53_pathway                | DLBC | 0.451005877  |
| CDA | P53_signaling_pathway      | DLBC | -0.06656222  |
| CDA | Pantothenate and coa bios  | DLBC | 0.406992122  |
| CDA | Pentose and glucuronate i  | DLBC | 0.035309411  |
| CDA | Pentose phosphate pathwa   | DLBC | 0.116032788  |
| CDA | Pericyte                   | DLBC | 0.249458362  |
| CDA | Phenylalanine metabolism   | DLBC | 0.103493588  |
| CDA | Phenylalanine, tyrosine ar | DLBC | -0.141573922 |
| CDA | Phosphonate and phosphir   | DLBC | 0.128118904  |
| CDA | Pi3k_akt_activation        | DLBC | 0.086092654  |
| CDA | Pi3k_akt_mtor_signaling    | DLBC | 0.094047046  |
| CDA | Porphyrin and chlorophyl   | DLBC | 0.017232877  |
| CDA | Primary bile acid biosyntf | DLBC | 0.557343373  |
| CDA | Propanoate metabolism      | DLBC | -0.151113755 |
| CDA | Purine metabolism          | DLBC | -0.216725833 |
| CDA | Pyrimidine metabolism      | DLBC | -0.233282777 |
| CDA | Pyruvate metabolism        | DLBC | 0.108257882  |
| CDA | Regulation_of_autophagy    | DLBC | 0.521712606  |
| CDA | Retinol metabolism         | DLBC | 0.291554741  |
| CDA | Riboflavin metabolism      | DLBC | 0.431397787  |
| CDA | Schmahl_pdgf_signaling     | DLBC | 0.347740612  |
| CDA | Selenocompound metabol     | DLBC | -0.109092195 |
| CDA | Signaling_by_hippo         | DLBC | -0.20814446  |
| CDA | Sphingolipid metabolism    | DLBC | 0.445045614  |
| CDA | Starch and sucrose metabo  | DLBC | 0.30860583   |
| CDA | Steroid biosynthesis       | DLBC | 0.208929107  |
| CDA | Steroid hormone biosynth   | DLBC | 0.21852748   |
| CDA | Sulfur metabolism          | DLBC | 0.108417947  |
| CDA | Synthesis and degradation  | DLBC | -0.07739851  |
| CDA | T helper cell              | DLBC | 0.354851531  |
| CDA | T helper1 (th1) cell       | DLBC | 0.434793175  |
| CDA | T helper17 (th17) cell     | DLBC | 0.314052521  |
| CDA | T helper2 (th2) cell       | DLBC | 0.278235357  |
| CDA | T helper9 (th9) cell       | DLBC | 0.267089047  |
| CDA | Taurine and hypotaurine r  | DLBC | 0.229859069  |
| CDA | Terpenoid backbone biosy   | DLBC | -0.057159735 |
| CDA | Tgf_beta_signaling_pathw   | DLBC | -0.180189427 |
| CDA | Thiamine metabolism        | DLBC | -0.041962966 |
| CDA | Tnfa_signaling_via_nfkb    | DLBC | 0.614201978  |
| CDA | Tryptophan metabolism      | DLBC | 0.371041977  |

|      |                            |      |              |
|------|----------------------------|------|--------------|
| CDA  | Tumor endothelial cell     | DLBC | 0.396703546  |
| CDA  | Tyrosine metabolism        | DLBC | 0.137062836  |
| CDA  | Ubiquinone and other ter   | DLBC | -0.033871974 |
| CDA  | Valine, leucine and isoleu | DLBC | 0.38045442   |
| CDA  | Valine, leucine and isoleu | DLBC | -0.064825176 |
| CDA  | Vascular endothelial cell  | DLBC | 0.096272458  |
| CDA  | Vascular smooth muscle c   | DLBC | 0.320051795  |
| CDA  | Vegf_signaling_pathway     | DLBC | 0.217514758  |
| CDA  | Vitamin b6 metabolism      | DLBC | 0.032013868  |
| CDA  | Willert_wnt_signaling      | DLBC | 0.019328199  |
| CDA  | Wnt_beta_catenin_signali   | DLBC | 0.056364047  |
| UCK1 | Abnormal plasma cell       | DLBC | -0.028047659 |
| UCK1 | Activated b cell           | DLBC | 0.109047073  |
| UCK1 | Activated cd4+ t cell      | DLBC | -0.370629979 |
| UCK1 | Activated t cell           | DLBC | -0.044772977 |
| UCK1 | Alanine, aspartate and glu | DLBC | -0.220241679 |
| UCK1 | Alcala_apoptosis           | DLBC | 0.292734985  |
| UCK1 | Alpha-linolenic acid meta  | DLBC | 0.71796766   |
| UCK1 | Amino sugar and nucleoti   | DLBC | 0.245666187  |
| UCK1 | Ampk_pathway               | DLBC | -0.319940966 |
| UCK1 | Angiogenesis               | DLBC | -0.01937734  |
| UCK1 | Arachidonic acid metabol   | DLBC | 0.574078899  |
| UCK1 | Arginine and proline met&  | DLBC | 0.396878274  |
| UCK1 | Arginine biosynthesis      | DLBC | -0.081578277 |
| UCK1 | Ascorbate and aldarate me  | DLBC | 0.419575207  |
| UCK1 | Atypical memory b cell     | DLBC | 0.043421223  |
| UCK1 | Axl+siglec6+ dendritic ce  | DLBC | -0.019545222 |
| UCK1 | B cell                     | DLBC | -0.291140264 |
| UCK1 | B1 cell                    | DLBC | 0.04518105   |
| UCK1 | Basal cell                 | DLBC | 0.389474857  |
| UCK1 | Beta-alanine metabolism    | DLBC | 0.498082285  |
| UCK1 | Biosynthesis of unsaturate | DLBC | 0.255830438  |
| UCK1 | Biotin metabolism          | DLBC | 0.457846881  |
| UCK1 | Butanoate metabolism       | DLBC | 0.490629319  |
| UCK1 | Caffeine metabolism        | DLBC | 0.494800094  |
| UCK1 | Cancer stem cell           | DLBC | -0.246158807 |
| UCK1 | Cancer stem-like cell      | DLBC | 0.037936961  |
| UCK1 | Cd4+ cytotoxic t cell      | DLBC | -0.02474062  |
| UCK1 | Cd4+ memory t cell         | DLBC | -0.131823864 |
| UCK1 | Cd4+ regulatory t cell     | DLBC | -0.315305934 |
| UCK1 | Cd4+ t helper cell         | DLBC | 0.02472914   |
| UCK1 | Cd4+cd25+ regulatory t c   | DLBC | -0.065646197 |
| UCK1 | Cd8+ cytotoxic t cell      | DLBC | -0.038147978 |

|      |                              |      |              |
|------|------------------------------|------|--------------|
| UCK1 | Cd8+ regulatory t cell       | DLBC | -0.181079912 |
| UCK1 | Cell_cycle                   | DLBC | -0.657108977 |
| UCK1 | Chandran_metastasis_top5     | DLBC | -0.707391701 |
| UCK1 | Citrate cycle (tca cycle)    | DLBC | -0.132276238 |
| UCK1 | Cysteine and methionine r    | DLBC | -0.160006543 |
| UCK1 | Cytokine induced killer cε   | DLBC | 0.127059682  |
| UCK1 | D-arginine and d-ornithin    | DLBC | 0.287168876  |
| UCK1 | D-glutamine and d-glutan     | DLBC | -0.621633045 |
| UCK1 | Dendritic cell               | DLBC | -0.087922308 |
| UCK1 | Dna_repair                   | DLBC | 0.444305821  |
| UCK1 | Dna_replication              | DLBC | -0.208923058 |
| UCK1 | Double-negative memory       | DLBC | 0.365753745  |
| UCK1 | Drug metabolism - cytoch     | DLBC | 0.584065352  |
| UCK1 | Drug metabolism - other (    | DLBC | 0.609586942  |
| UCK1 | E2f_targets                  | DLBC | -0.553914182 |
| UCK1 | Ecm_receptor_interaction     | DLBC | -0.184437433 |
| UCK1 | Effector cd4+ memory t (     | DLBC | -0.149320718 |
| UCK1 | Effector cd8+ memory t (     | DLBC | -0.247162716 |
| UCK1 | Effector memory t cell       | DLBC | -0.23158744  |
| UCK1 | Effector regulatory t (treg  | DLBC | -0.443599952 |
| UCK1 | Elvidge_hif1a_targets_up     | DLBC | -0.742667306 |
| UCK1 | Endothelial cell             | DLBC | -0.278789929 |
| UCK1 | Eosinophil                   | DLBC | -0.144493564 |
| UCK1 | Ether lipid metabolism       | DLBC | 0.394960019  |
| UCK1 | Exhausted cd4+ t cell        | DLBC | -0.123226338 |
| UCK1 | Exhausted cd8+ t cell        | DLBC | -0.224712451 |
| UCK1 | Exhausted t cell             | DLBC | 0.054127871  |
| UCK1 | Fat cell (adipocyte)         | DLBC | 0.361076236  |
| UCK1 | Fatty acid biosynthesis      | DLBC | -0.396778467 |
| UCK1 | Fatty acid degradation       | DLBC | 0.391103289  |
| UCK1 | Fatty acid elongation        | DLBC | 0.399230033  |
| UCK1 | Fibroblast                   | DLBC | -0.217499668 |
| UCK1 | Folate biosynthesis          | DLBC | 0.492360322  |
| UCK1 | Follicular b cell            | DLBC | -0.062229479 |
| UCK1 | Follicular dendritic cell    | DLBC | 0.050343867  |
| UCK1 | Follicular helper (tfh) t ce | DLBC | -0.099147691 |
| UCK1 | Follicular t cell            | DLBC | 0.199003721  |
| UCK1 | Foxp3+il-17+ t cell          | DLBC | -0.318785062 |
| UCK1 | Fructose and mannose me      | DLBC | 0.50966238   |
| UCK1 | G2m_checkpoint               | DLBC | -0.715357075 |
| UCK1 | Galactose metabolism         | DLBC | 0.316875713  |
| UCK1 | Galie_tumor_stemness_ge      | DLBC | -0.361878559 |
| UCK1 | Glutathione metabolism       | DLBC | 0.504420498  |



|      |                                           |      |              |
|------|-------------------------------------------|------|--------------|
| UCK1 | Glycerolipid metabolism                   | DLBC | 0.287087855  |
| UCK1 | Glycerophospholipid metabolism            | DLBC | 0.567927289  |
| UCK1 | Glycine, serine and threonine metabolism  | DLBC | 0.235240616  |
| UCK1 | Glycolysis / gluconeogenesis              | DLBC | 0.175508873  |
| UCK1 | Glycosaminoglycan biosynthesis            | DLBC | 0.2346161    |
| UCK1 | Glycosaminoglycan biosynthesis            | DLBC | 0.429213221  |
| UCK1 | Glycosaminoglycan biosynthesis            | DLBC | -0.111587457 |
| UCK1 | Glycosaminoglycan degradation             | DLBC | 0.354466652  |
| UCK1 | Glycosphingolipid biosynthesis            | DLBC | 0.268859225  |
| UCK1 | Glycosphingolipid biosynthesis            | DLBC | 0.48231178   |
| UCK1 | Glycosphingolipid biosynthesis            | DLBC | 0.504172734  |
| UCK1 | Glycosylphosphatidylinositol biosynthesis | DLBC | 0.342272255  |
| UCK1 | Glyoxylate and dicarboxylate metabolism   | DLBC | 0.32946094   |
| UCK1 | Granulocyte                               | DLBC | -0.212591396 |
| UCK1 | Hedgehog signaling                        | DLBC | -0.171867242 |
| UCK1 | Histidine metabolism                      | DLBC | 0.397208056  |
| UCK1 | Hypoxia                                   | DLBC | 0.103783451  |
| UCK1 | IL-17Ralpha T cell                        | DLBC | -0.080653334 |
| UCK1 | IL2 STAT5 signaling                       | DLBC | -0.033315082 |
| UCK1 | IL6 JAK STAT3 signaling                   | DLBC | -0.365989906 |
| UCK1 | Immune checkpoints                        | DLBC | -0.075145615 |
| UCK1 | Immune inhibition                         | DLBC | 0.06397909   |
| UCK1 | Inositol phosphate metabolism             | DLBC | -0.559098661 |
| UCK1 | Interleukin_6 signaling                   | DLBC | -0.682707455 |
| UCK1 | Jaeger metastasis up                      | DLBC | -0.251663799 |
| UCK1 | Jain nfkb signaling                       | DLBC | -0.563579817 |
| UCK1 | Kras signaling up                         | DLBC | -0.208993147 |
| UCK1 | Linoleic acid metabolism                  | DLBC | 0.584535266  |
| UCK1 | Lipoic acid metabolism                    | DLBC | 0.37790307   |
| UCK1 | Lysine degradation                        | DLBC | -0.43583605  |
| UCK1 | Lysosome                                  | DLBC | 0.327688852  |
| UCK1 | M1 macrophage                             | DLBC | -0.284353843 |
| UCK1 | M2 macrophage                             | DLBC | -0.150851992 |
| UCK1 | Mannose type o-glycan biosynthesis        | DLBC | 0.209274879  |
| UCK1 | Mapk signaling pathway                    | DLBC | -0.527796438 |
| UCK1 | Mapk3 erk1 activation                     | DLBC | -0.735043994 |
| UCK1 | Marginal zone B cell                      | DLBC | -0.086592091 |
| UCK1 | Memory B cell                             | DLBC | -0.111667989 |
| UCK1 | Mesenchymal cell                          | DLBC | 0.17352137   |
| UCK1 | Mesenchymal stem cell                     | DLBC | -0.168603742 |
| UCK1 | Metabolism of xenobiotics                 | DLBC | 0.619901187  |
| UCK1 | Migrating cancer stem cell                | DLBC | 0.037147853  |
| UCK1 | Mitotic spindle                           | DLBC | -0.742623056 |

|      |                                                   |      |              |
|------|---------------------------------------------------|------|--------------|
| UCK1 | Monocyte                                          | DLBC | -0.075411301 |
| UCK1 | Mtor_signaling_pathway                            | DLBC | -0.533582059 |
| UCK1 | Mtorc1_signaling                                  | DLBC | -0.230635741 |
| UCK1 | Mucin type o-glycan biosynthesis                  | DLBC | -0.257762162 |
| UCK1 | Myc_targets_v1                                    | DLBC | -0.069197474 |
| UCK1 | Myeloid cell                                      | DLBC | -0.226772836 |
| UCK1 | N-glycan biosynthesis                             | DLBC | -0.073503854 |
| UCK1 | Naive b cell                                      | DLBC | -0.058308886 |
| UCK1 | Naive cd4+ t cell                                 | DLBC | -0.157146355 |
| UCK1 | Naive cd8+ t cell                                 | DLBC | -0.137183561 |
| UCK1 | Natural killer cell                               | DLBC | -0.065061531 |
| UCK1 | Natural killer t (nkt) cell                       | DLBC | -0.212335684 |
| UCK1 | Natural regulatory t (treg) cell                  | DLBC | -0.236111023 |
| UCK1 | Neomycin, kanamycin and streptomycin              | DLBC | 0.075232001  |
| UCK1 | Neutrophil                                        | DLBC | -0.092376722 |
| UCK1 | Nicotinate and nicotinamide metabolism            | DLBC | 0.044562663  |
| UCK1 | Nitrogen metabolism                               | DLBC | -0.190132615 |
| UCK1 | Nod_like_receptor_signaling                       | DLBC | -0.457204232 |
| UCK1 | Notch_signaling                                   | DLBC | 0.250695809  |
| UCK1 | One carbon pool by folate                         | DLBC | -0.455335679 |
| UCK1 | Other glycan degradation                          | DLBC | 0.361331484  |
| UCK1 | Other types of o-glycan biosynthesis              | DLBC | 0.165921467  |
| UCK1 | Oxidative phosphorylation                         | DLBC | 0.575863365  |
| UCK1 | P53_pathway                                       | DLBC | 0.299163455  |
| UCK1 | P53_signaling_pathway                             | DLBC | -0.41520511  |
| UCK1 | Pantothenate and coenzyme a biosynthesis          | DLBC | 0.161865151  |
| UCK1 | Pentose and glucuronate interconversions          | DLBC | 0.559885121  |
| UCK1 | Pentose phosphate pathway                         | DLBC | 0.324802094  |
| UCK1 | Pericyte                                          | DLBC | -0.003287124 |
| UCK1 | Phenylalanine metabolism                          | DLBC | 0.25337367   |
| UCK1 | Phenylalanine, tyrosine and tryptophan metabolism | DLBC | -0.032971311 |
| UCK1 | Phosphonate and phosphonate metabolism            | DLBC | -0.207467927 |
| UCK1 | Pi3k_akt_activation                               | DLBC | -0.234987917 |
| UCK1 | Pi3k_akt_mtor_signaling                           | DLBC | -0.467460041 |
| UCK1 | Porphyrin and chlorophyll metabolism              | DLBC | 0.464141223  |
| UCK1 | Primary bile acid biosynthesis                    | DLBC | 0.442797783  |
| UCK1 | Propanoate metabolism                             | DLBC | 0.083786614  |
| UCK1 | Purine metabolism                                 | DLBC | 0.129948541  |
| UCK1 | Pyrimidine metabolism                             | DLBC | 0.096267058  |
| UCK1 | Pyruvate metabolism                               | DLBC | 0.292909531  |
| UCK1 | Regulation_of_autophagy                           | DLBC | 0.10969247   |
| UCK1 | Retinol metabolism                                | DLBC | 0.566115697  |
| UCK1 | Riboflavin metabolism                             | DLBC | 0.503527908  |

|      |                            |      |              |
|------|----------------------------|------|--------------|
| UCK1 | Schmahl_pdgf_signaling     | DLBC | -0.119111241 |
| UCK1 | Selenocompound metabol     | DLBC | -0.662376432 |
| UCK1 | Signaling_by_hippo         | DLBC | -0.57774971  |
| UCK1 | Sphingolipid metabolism    | DLBC | -0.110676537 |
| UCK1 | Starch and sucrose metabo  | DLBC | 0.29190215   |
| UCK1 | Steroid biosynthesis       | DLBC | 0.177782036  |
| UCK1 | Steroid hormone biosynth   | DLBC | 0.512187898  |
| UCK1 | Sulfur metabolism          | DLBC | 0.461587755  |
| UCK1 | Synthesis and degradation  | DLBC | 0.264174276  |
| UCK1 | T helper cell              | DLBC | -0.171698849 |
| UCK1 | T helper1 (th1) cell       | DLBC | -0.019609289 |
| UCK1 | T helper17 (th17) cell     | DLBC | -0.335339533 |
| UCK1 | T helper2 (th2) cell       | DLBC | -0.15220207  |
| UCK1 | T helper9 (th9) cell       | DLBC | -0.003601693 |
| UCK1 | Taurine and hypotaurine r  | DLBC | 0.499492084  |
| UCK1 | Terpenoid backbone biosy   | DLBC | 0.303362618  |
| UCK1 | Tgf_beta_signaling_pathw   | DLBC | -0.594513439 |
| UCK1 | Thiamine metabolism        | DLBC | 0.459068145  |
| UCK1 | Tnfa_signaling_via_nfkb    | DLBC | -0.258153251 |
| UCK1 | Tryptophan metabolism      | DLBC | 0.41217155   |
| UCK1 | Tumor endothelial cell     | DLBC | 0.131988226  |
| UCK1 | Tyrosine metabolism        | DLBC | 0.478761428  |
| UCK1 | Ubiquinone and other terq  | DLBC | 0.517355146  |
| UCK1 | Valine, leucine and isoleu | DLBC | 0.359821745  |
| UCK1 | Valine, leucine and isoleu | DLBC | 0.228337504  |
| UCK1 | Vascular endothelial cell  | DLBC | -0.144378314 |
| UCK1 | Vascular smooth muscle c   | DLBC | -0.156020758 |
| UCK1 | Vegf_signaling_pathway     | DLBC | -0.060537887 |
| UCK1 | Vitamin b6 metabolism      | DLBC | 0.354478156  |
| UCK1 | Willert_wnt_signaling      | DLBC | 0.14211732   |
| UCK1 | Wnt_beta_catenin_signali   | DLBC | -0.3813535   |
| UCK2 | Abnormal plasma cell       | DLBC | -0.209353674 |
| UCK2 | Activated b cell           | DLBC | -0.354953107 |
| UCK2 | Activated cd4+ t cell      | DLBC | 0.083138889  |
| UCK2 | Activated t cell           | DLBC | -0.133398872 |
| UCK2 | Alanine, aspartate and glu | DLBC | 0.615017097  |
| UCK2 | Alcala_apoptosis           | DLBC | 0.390970947  |
| UCK2 | Alpha-linolenic acid meta  | DLBC | 0.026957633  |
| UCK2 | Amino sugar and nucleoti   | DLBC | 0.291721222  |
| UCK2 | Ampk_pathway               | DLBC | 0.18082507   |
| UCK2 | Angiogenesis               | DLBC | 0.043536328  |
| UCK2 | Arachidonic acid metaboli  | DLBC | -0.01406284  |
| UCK2 | Arginine and proline metæ  | DLBC | 0.202539465  |

|      |                             |      |              |
|------|-----------------------------|------|--------------|
| UCK2 | Arginine biosynthesis       | DLBC | 0.515974254  |
| UCK2 | Ascorbate and aldarate me   | DLBC | 0.108337428  |
| UCK2 | Atypical memory b cell      | DLBC | -0.231407435 |
| UCK2 | Axl+siglec6+ dendritic ce   | DLBC | 0.04735604   |
| UCK2 | B cell                      | DLBC | -0.072807949 |
| UCK2 | B1 cell                     | DLBC | -0.31269982  |
| UCK2 | Basal cell                  | DLBC | 0.124588455  |
| UCK2 | Beta-alanine metabolism     | DLBC | -0.087602951 |
| UCK2 | Biosynthesis of unsaturate  | DLBC | 0.218044113  |
| UCK2 | Biotin metabolism           | DLBC | -0.17597899  |
| UCK2 | Butanoate metabolism        | DLBC | 0.058549522  |
| UCK2 | Caffeine metabolism         | DLBC | -0.427986696 |
| UCK2 | Cancer stem cell            | DLBC | 0.217161437  |
| UCK2 | Cancer stem-like cell       | DLBC | 0.010188927  |
| UCK2 | Cd4+ cytotoxic t cell       | DLBC | 0.094584397  |
| UCK2 | Cd4+ memory t cell          | DLBC | -0.13632156  |
| UCK2 | Cd4+ regulatory t cell      | DLBC | -0.144322632 |
| UCK2 | Cd4+ t helper cell          | DLBC | -0.15820796  |
| UCK2 | Cd4+cd25+ regulatory t c    | DLBC | -0.098643064 |
| UCK2 | Cd8+ cytotoxic t cell       | DLBC | 0.07146276   |
| UCK2 | Cd8+ regulatory t cell      | DLBC | 0.125396541  |
| UCK2 | Cell_cycle                  | DLBC | 0.405687333  |
| UCK2 | Chandran_metastasis_top5    | DLBC | 0.340558866  |
| UCK2 | Citrate cycle (tca cycle)   | DLBC | 0.529336697  |
| UCK2 | Cysteine and methionine r   | DLBC | 0.601403731  |
| UCK2 | Cytokine induced killer c   | DLBC | -0.215148065 |
| UCK2 | D-arginine and d-ornithin   | DLBC | 0.010749088  |
| UCK2 | D-glutamine and d-glutan    | DLBC | 0.214699299  |
| UCK2 | Dendritic cell              | DLBC | -0.223423504 |
| UCK2 | Dna_repair                  | DLBC | 0.201954629  |
| UCK2 | Dna_replication             | DLBC | 0.418954313  |
| UCK2 | Double-negative memory      | DLBC | -0.238261509 |
| UCK2 | Drug metabolism - cytoch    | DLBC | -0.046492266 |
| UCK2 | Drug metabolism - other c   | DLBC | 0.092636754  |
| UCK2 | E2f_targets                 | DLBC | 0.450308247  |
| UCK2 | Ecm_receptor_interaction    | DLBC | 0.155386296  |
| UCK2 | Effector cd4+ memory t (    | DLBC | -0.040872389 |
| UCK2 | Effector cd8+ memory t (    | DLBC | 0.136823378  |
| UCK2 | Effector memory t cell      | DLBC | -0.017049246 |
| UCK2 | Effector regulatory t (treg | DLBC | 0.195954601  |
| UCK2 | Elvidge_hif1a_targets_up    | DLBC | 0.502305731  |
| UCK2 | Endothelial cell            | DLBC | 0.210542967  |
| UCK2 | Eosinophil                  | DLBC | 0.065933474  |

|      |                                          |      |              |
|------|------------------------------------------|------|--------------|
| UCK2 | Ether lipid metabolism                   | DLBC | 0.023357057  |
| UCK2 | Exhausted cd4+ t cell                    | DLBC | -0.160241137 |
| UCK2 | Exhausted cd8+ t cell                    | DLBC | 0.00301345   |
| UCK2 | Exhausted t cell                         | DLBC | -0.120855712 |
| UCK2 | Fat cell (adipocyte)                     | DLBC | 0.101590794  |
| UCK2 | Fatty acid biosynthesis                  | DLBC | 0.310697034  |
| UCK2 | Fatty acid degradation                   | DLBC | 0.211249398  |
| UCK2 | Fatty acid elongation                    | DLBC | 0.19190275   |
| UCK2 | Fibroblast                               | DLBC | 0.028351408  |
| UCK2 | Folate biosynthesis                      | DLBC | 0.064814273  |
| UCK2 | Follicular b cell                        | DLBC | -0.414102475 |
| UCK2 | Follicular dendritic cell                | DLBC | -0.312992503 |
| UCK2 | Follicular helper (tfh) t cell           | DLBC | -0.172814875 |
| UCK2 | Follicular t cell                        | DLBC | -0.132422873 |
| UCK2 | Foxp3+il-17+ t cell                      | DLBC | -0.360410232 |
| UCK2 | Fructose and mannose metabolism          | DLBC | 0.189201376  |
| UCK2 | G2m_checkpoint                           | DLBC | 0.440499583  |
| UCK2 | Galactose metabolism                     | DLBC | 0.233353582  |
| UCK2 | Galie_tumor_stemness_genes               | DLBC | 0.079963276  |
| UCK2 | Glutathione metabolism                   | DLBC | 0.115100713  |
| UCK2 | Glycerolipid metabolism                  | DLBC | 0.271537045  |
| UCK2 | Glycerophospholipid metabolism           | DLBC | -0.018140011 |
| UCK2 | Glycine, serine and threonine metabolism | DLBC | 0.300089709  |
| UCK2 | Glycolysis / gluconeogenesis             | DLBC | 0.364650781  |
| UCK2 | Glycosaminoglycan biosynthesis           | DLBC | -0.066118133 |
| UCK2 | Glycosaminoglycan biosynthesis           | DLBC | -0.369103653 |
| UCK2 | Glycosaminoglycan biosynthesis           | DLBC | 0.018637012  |
| UCK2 | Glycosaminoglycan degradation            | DLBC | -0.11966959  |
| UCK2 | Glycosphingolipid biosynthesis           | DLBC | -0.233125951 |
| UCK2 | Glycosphingolipid biosynthesis           | DLBC | -0.125829963 |
| UCK2 | Glycosphingolipid biosynthesis           | DLBC | -0.226420468 |
| UCK2 | Glycosylphosphatidylinositol             | DLBC | -0.173573164 |
| UCK2 | Glyoxylate and dicarboxylate metabolism  | DLBC | 0.216458145  |
| UCK2 | Granulocyte                              | DLBC | 0.198354644  |
| UCK2 | Hedgehog_signaling                       | DLBC | -0.138577925 |
| UCK2 | Histidine metabolism                     | DLBC | 0.081410267  |
| UCK2 | Hypoxia                                  | DLBC | 0.010938466  |
| UCK2 | Il-17alpha t cell                        | DLBC | -0.168870408 |
| UCK2 | Il2_stat5_signaling                      | DLBC | 0.087341632  |
| UCK2 | Il6_jak_stat3_signaling                  | DLBC | 0.153684989  |
| UCK2 | Immune_checkpoints_tumor                 | DLBC | 0.237848011  |
| UCK2 | Immune_inhibition_cytokines              | DLBC | 0.076907666  |
| UCK2 | Inositol phosphate metabolism            | DLBC | -0.014528068 |

|      |                             |      |              |
|------|-----------------------------|------|--------------|
| UCK2 | Interleukin_6_signaling     | DLBC | 0.219584325  |
| UCK2 | Jaeger_metastasis_up        | DLBC | 0.337419989  |
| UCK2 | Jain_nfkb_signaling         | DLBC | 0.570072795  |
| UCK2 | Kras_signaling_up           | DLBC | 0.222982518  |
| UCK2 | Linoleic acid metabolism    | DLBC | 0.006635073  |
| UCK2 | Lipoic acid metabolism      | DLBC | -0.252522032 |
| UCK2 | Lysine degradation          | DLBC | 0.250042846  |
| UCK2 | Lysosome                    | DLBC | -0.119672002 |
| UCK2 | M1 macrophage               | DLBC | 0.20078085   |
| UCK2 | M2 macrophage               | DLBC | 0.301487117  |
| UCK2 | Mannose type o-glycan bi    | DLBC | 0.019251809  |
| UCK2 | Mapk_signaling_pathway      | DLBC | 0.08587871   |
| UCK2 | Mapk3_erk1_activation       | DLBC | 0.142031015  |
| UCK2 | Marginal zone b cell        | DLBC | -0.091207409 |
| UCK2 | Memory b cell               | DLBC | -0.283955598 |
| UCK2 | Mesenchymal cell            | DLBC | 0.079722891  |
| UCK2 | Mesenchymal stem cell       | DLBC | 0.041837757  |
| UCK2 | Metabolism of xenobiotic    | DLBC | 0.009049555  |
| UCK2 | Migrating cancer stem cel   | DLBC | 0.179519706  |
| UCK2 | Mitotic_spindle             | DLBC | 0.136191211  |
| UCK2 | Monocyte                    | DLBC | 0.100905794  |
| UCK2 | Mtor_signaling_pathway      | DLBC | -0.014217245 |
| UCK2 | Mtorc1_signaling            | DLBC | 0.588273267  |
| UCK2 | Mucin type o-glycan biosy   | DLBC | -0.226372876 |
| UCK2 | Myc_targets_v1              | DLBC | 0.606746043  |
| UCK2 | Myeloid cell                | DLBC | -0.014109833 |
| UCK2 | N-glycan biosynthesis       | DLBC | -0.032983717 |
| UCK2 | Naive b cell                | DLBC | -0.233554833 |
| UCK2 | Naive cd4+ t cell           | DLBC | -0.145823407 |
| UCK2 | Naive cd8+ t cell           | DLBC | -0.143896752 |
| UCK2 | Natural killer cell         | DLBC | -0.02074468  |
| UCK2 | Natural killer t (nkt) cell | DLBC | 0.161292391  |
| UCK2 | Natural regulatory t (treg) | DLBC | -0.195763898 |
| UCK2 | Neomycin, kanamycin an      | DLBC | 0.244784664  |
| UCK2 | Neutrophil                  | DLBC | 0.190431868  |
| UCK2 | Nicotinate and nicotinami   | DLBC | 0.076621972  |
| UCK2 | Nitrogen metabolism         | DLBC | 0.307727662  |
| UCK2 | Nod_like_receptor_signal    | DLBC | 0.137114091  |
| UCK2 | Notch_signaling             | DLBC | -0.118181458 |
| UCK2 | One carbon pool by folate   | DLBC | 0.578697501  |
| UCK2 | Other glycan degradation    | DLBC | -0.188702189 |
| UCK2 | Other types of o-glycan b   | DLBC | -0.121819866 |
| UCK2 | Oxidative phosphorylatior   | DLBC | 0.080465744  |

|      |                            |      |              |
|------|----------------------------|------|--------------|
| UCK2 | P53_pathway                | DLBC | 0.050775847  |
| UCK2 | P53_signaling_pathway      | DLBC | 0.317322318  |
| UCK2 | Pantothenate and coa bios  | DLBC | 0.125871864  |
| UCK2 | Pentose and glucuronate i  | DLBC | 0.102704764  |
| UCK2 | Pentose phosphate pathwa   | DLBC | 0.027523884  |
| UCK2 | Pericyte                   | DLBC | -0.096268986 |
| UCK2 | Phenylalanine metabolism   | DLBC | 0.271321167  |
| UCK2 | Phenylalanine, tyrosine ar | DLBC | 0.206382822  |
| UCK2 | Phosphonate and phosphir   | DLBC | 0.158472403  |
| UCK2 | Pi3k_akt_activation        | DLBC | -0.123961606 |
| UCK2 | Pi3k_akt_mtor_signaling    | DLBC | 0.1906613    |
| UCK2 | Porphyrin and chlorophyl   | DLBC | 0.20153613   |
| UCK2 | Primary bile acid biosynt  | DLBC | -0.064796112 |
| UCK2 | Propanoate metabolism      | DLBC | 0.127342937  |
| UCK2 | Purine metabolism          | DLBC | 0.464675367  |
| UCK2 | Pyrimidine metabolism      | DLBC | 0.520488253  |
| UCK2 | Pyruvate metabolism        | DLBC | 0.359308615  |
| UCK2 | Regulation_of_autophagy    | DLBC | -0.126081871 |
| UCK2 | Retinol metabolism         | DLBC | 0.026073566  |
| UCK2 | Riboflavin metabolism      | DLBC | 0.003459578  |
| UCK2 | Schmahl_pdgf_signaling     | DLBC | -0.404811977 |
| UCK2 | Selenocompound metabol     | DLBC | 0.440250008  |
| UCK2 | Signaling_by_hippo         | DLBC | -0.006773968 |
| UCK2 | Sphingolipid metabolism    | DLBC | -0.208099869 |
| UCK2 | Starch and sucrose metabo  | DLBC | 0.009361985  |
| UCK2 | Steroid biosynthesis       | DLBC | 0.228293356  |
| UCK2 | Steroid hormone biosynth   | DLBC | 0.064162239  |
| UCK2 | Sulfur metabolism          | DLBC | -0.13868082  |
| UCK2 | Synthesis and degradation  | DLBC | 0.290851391  |
| UCK2 | T helper cell              | DLBC | -0.117084685 |
| UCK2 | T helper1 (th1) cell       | DLBC | -0.093328467 |
| UCK2 | T helper17 (th17) cell     | DLBC | -0.028739311 |
| UCK2 | T helper2 (th2) cell       | DLBC | -0.081303796 |
| UCK2 | T helper9 (th9) cell       | DLBC | -0.018522607 |
| UCK2 | Taurine and hypotaurine r  | DLBC | -0.269955911 |
| UCK2 | Terpenoid backbone biosy   | DLBC | 0.227586875  |
| UCK2 | Tgf_beta_signaling_pathw   | DLBC | 0.106366851  |
| UCK2 | Thiamine metabolism        | DLBC | -0.013801207 |
| UCK2 | Tnfa_signaling_via_nfkb    | DLBC | 0.146698321  |
| UCK2 | Tryptophan metabolism      | DLBC | 0.023010619  |
| UCK2 | Tumor endothelial cell     | DLBC | -0.063364054 |
| UCK2 | Tyrosine metabolism        | DLBC | 0.161583924  |
| UCK2 | Ubiquinone and other ter   | DLBC | -0.026792428 |

|       |                            |      |              |
|-------|----------------------------|------|--------------|
| UCK2  | Valine, leucine and isoleu | DLBC | 0.21785111   |
| UCK2  | Valine, leucine and isoleu | DLBC | 0.186997207  |
| UCK2  | Vascular endothelial cell  | DLBC | 0.2318749    |
| UCK2  | Vascular smooth muscle c   | DLBC | -0.036957376 |
| UCK2  | Vegf_signaling_pathway     | DLBC | -0.166281402 |
| UCK2  | Vitamin b6 metabolism      | DLBC | -0.00775558  |
| UCK2  | Willert_wnt_signaling      | DLBC | 0.479037776  |
| UCK2  | Wnt_beta_catenin_signali   | DLBC | -0.176313281 |
| UCKL1 | Abnormal plasma cell       | DLBC | -0.060304434 |
| UCKL1 | Activated b cell           | DLBC | -0.214634822 |
| UCKL1 | Activated cd4+ t cell      | DLBC | -0.285849189 |
| UCKL1 | Activated t cell           | DLBC | -0.1626188   |
| UCKL1 | Alanine, aspartate and glu | DLBC | -0.209327539 |
| UCKL1 | Alcala_apoptosis           | DLBC | 0.241222187  |
| UCKL1 | Alpha-linolenic acid meta  | DLBC | 0.351993377  |
| UCKL1 | Amino sugar and nucleoti   | DLBC | 0.245356198  |
| UCKL1 | Ampk_pathway               | DLBC | -0.120872782 |
| UCKL1 | Angiogenesis               | DLBC | 0.014703797  |
| UCKL1 | Arachidonic acid metabol   | DLBC | 0.422080983  |
| UCKL1 | Arginine and proline metæ  | DLBC | 0.284510989  |
| UCKL1 | Arginine biosynthesis      | DLBC | -0.007842482 |
| UCKL1 | Ascorbate and aldarate mε  | DLBC | 0.232133637  |
| UCKL1 | Atypical memory b cell     | DLBC | 0.241984487  |
| UCKL1 | Axl+siglec6+ dendritic ce  | DLBC | -0.136278506 |
| UCKL1 | B cell                     | DLBC | -0.026050364 |
| UCKL1 | B1 cell                    | DLBC | -0.191873403 |
| UCKL1 | Basal cell                 | DLBC | 0.22174488   |
| UCKL1 | Beta-alanine metabolism    | DLBC | 0.185743021  |
| UCKL1 | Biosynthesis of unsaturate | DLBC | 0.106253608  |
| UCKL1 | Biotin metabolism          | DLBC | 0.401450997  |
| UCKL1 | Butanoate metabolism       | DLBC | 0.41385624   |
| UCKL1 | Caffeine metabolism        | DLBC | 0.139392193  |
| UCKL1 | Cancer stem cell           | DLBC | -0.19433257  |
| UCKL1 | Cancer stem-like cell      | DLBC | -0.102958886 |
| UCKL1 | Cd4+ cytotoxic t cell      | DLBC | -0.149983683 |
| UCKL1 | Cd4+ memory t cell         | DLBC | -0.285691894 |
| UCKL1 | Cd4+ regulatory t cell     | DLBC | -0.284499061 |
| UCKL1 | Cd4+ t helper cell         | DLBC | -0.140134642 |
| UCKL1 | Cd4+cd25+ regulatory t c   | DLBC | -0.152210877 |
| UCKL1 | Cd8+ cytotoxic t cell      | DLBC | -0.171472835 |
| UCKL1 | Cd8+ regulatory t cell     | DLBC | -0.323603068 |
| UCKL1 | Cell_cycle                 | DLBC | -0.317842613 |
| UCKL1 | Chandran_metastasis_topε   | DLBC | -0.463005369 |



|       |                              |      |              |
|-------|------------------------------|------|--------------|
| UCKL1 | Citrate cycle (tca cycle)    | DLBC | 0.02272642   |
| UCKL1 | Cysteine and methionine r    | DLBC | 0.098337187  |
| UCKL1 | Cytokine induced killer c    | DLBC | -0.060601686 |
| UCKL1 | D-arginine and d-ornithin    | DLBC | 0.158045313  |
| UCKL1 | D-glutamine and d-glutan     | DLBC | -0.508184376 |
| UCKL1 | Dendritic cell               | DLBC | -0.269285649 |
| UCKL1 | Dna_repair                   | DLBC | 0.430111546  |
| UCKL1 | Dna_replication              | DLBC | 0.03469353   |
| UCKL1 | Double-negative memory       | DLBC | 0.208872524  |
| UCKL1 | Drug metabolism - cytoch     | DLBC | 0.441177467  |
| UCKL1 | Drug metabolism - other (    | DLBC | 0.502492708  |
| UCKL1 | E2f_targets                  | DLBC | -0.186103109 |
| UCKL1 | Ecm_receptor_interaction     | DLBC | -0.120711265 |
| UCKL1 | Effector cd4+ memory t (     | DLBC | -0.300607621 |
| UCKL1 | Effector cd8+ memory t (     | DLBC | -0.249210823 |
| UCKL1 | Effector memory t cell       | DLBC | -0.363206011 |
| UCKL1 | Effector regulatory t (treg  | DLBC | -0.208537317 |
| UCKL1 | Elvidge_hif1a_targets_up     | DLBC | -0.402045115 |
| UCKL1 | Endothelial cell             | DLBC | -0.175500945 |
| UCKL1 | Eosinophil                   | DLBC | -0.257161422 |
| UCKL1 | Ether lipid metabolism       | DLBC | 0.15962823   |
| UCKL1 | Exhausted cd4+ t cell        | DLBC | -0.290256049 |
| UCKL1 | Exhausted cd8+ t cell        | DLBC | -0.281836462 |
| UCKL1 | Exhausted t cell             | DLBC | -0.111669393 |
| UCKL1 | Fat cell (adipocyte)         | DLBC | 0.256057592  |
| UCKL1 | Fatty acid biosynthesis      | DLBC | -0.260552485 |
| UCKL1 | Fatty acid degradation       | DLBC | 0.238000427  |
| UCKL1 | Fatty acid elongation        | DLBC | 0.340569274  |
| UCKL1 | Fibroblast                   | DLBC | -0.112866866 |
| UCKL1 | Folate biosynthesis          | DLBC | 0.301133317  |
| UCKL1 | Follicular b cell            | DLBC | -0.095220102 |
| UCKL1 | Follicular dendritic cell    | DLBC | -0.046962207 |
| UCKL1 | Follicular helper (tfh) t ce | DLBC | -0.261133571 |
| UCKL1 | Follicular t cell            | DLBC | 0.157092367  |
| UCKL1 | Foxp3+il-17+ t cell          | DLBC | -0.363185751 |
| UCKL1 | Fructose and mannose me      | DLBC | 0.408405522  |
| UCKL1 | G2m_checkpoint               | DLBC | -0.337157165 |
| UCKL1 | Galactose metabolism         | DLBC | 0.325047427  |
| UCKL1 | Galie_tumor_stemness_ge      | DLBC | -0.352652551 |
| UCKL1 | Glutathione metabolism       | DLBC | 0.358003363  |
| UCKL1 | Glycerolipid metabolism      | DLBC | 0.044443472  |
| UCKL1 | Glycerophospholipid met      | DLBC | 0.280476111  |
| UCKL1 | Glycine, serine and threor   | DLBC | 0.290217511  |

|       |                           |      |              |
|-------|---------------------------|------|--------------|
| UCKL1 | Glycolysis / gluconeogene | DLBC | 0.334725582  |
| UCKL1 | Glycosaminoglycan biosyn  | DLBC | 0.025475271  |
| UCKL1 | Glycosaminoglycan biosyn  | DLBC | 0.06666815   |
| UCKL1 | Glycosaminoglycan biosyn  | DLBC | -0.00883816  |
| UCKL1 | Glycosaminoglycan degra   | DLBC | 0.005880583  |
| UCKL1 | Glycosphingolipid biosyn  | DLBC | -0.182320034 |
| UCKL1 | Glycosphingolipid biosyn  | DLBC | 0.084429578  |
| UCKL1 | Glycosphingolipid biosyn  | DLBC | 0.487263298  |
| UCKL1 | Glycosylphosphatidylinos  | DLBC | 0.563420724  |
| UCKL1 | Glyoxylate and dicarboxy  | DLBC | 0.355989386  |
| UCKL1 | Granulocyte               | DLBC | -0.248034214 |
| UCKL1 | Hedgehog_signaling        | DLBC | -0.407806804 |
| UCKL1 | Histidine metabolism      | DLBC | 0.133815894  |
| UCKL1 | Hypoxia                   | DLBC | 0.004542713  |
| UCKL1 | Il-17alpha t cell         | DLBC | -0.232197084 |
| UCKL1 | Il2_stat5_signaling       | DLBC | -0.197605341 |
| UCKL1 | Il6_jak_stat3_signaling   | DLBC | -0.428758791 |
| UCKL1 | Immune_checkpoints_tur    | DLBC | -0.103573083 |
| UCKL1 | Immune_inhibition_cytok   | DLBC | -0.008090231 |
| UCKL1 | Inositol phosphate metabo | DLBC | -0.50257529  |
| UCKL1 | Interleukin_6_signaling   | DLBC | -0.607172304 |
| UCKL1 | Jaeger_metastasis_up      | DLBC | -0.066822886 |
| UCKL1 | Jain_nfkb_signaling       | DLBC | -0.288415152 |
| UCKL1 | Kras_signaling_up         | DLBC | -0.239989984 |
| UCKL1 | Linoleic acid metabolism  | DLBC | 0.474039276  |
| UCKL1 | Lipoic acid metabolism    | DLBC | 0.399783006  |
| UCKL1 | Lysine degradation        | DLBC | -0.262307735 |
| UCKL1 | Lysosome                  | DLBC | -0.098680969 |
| UCKL1 | M1 macrophage             | DLBC | -0.358808008 |
| UCKL1 | M2 macrophage             | DLBC | -0.14459112  |
| UCKL1 | Mannose type o-glycan bi  | DLBC | 0.30281253   |
| UCKL1 | Mapk_signaling_pathway    | DLBC | -0.502522424 |
| UCKL1 | Mapk3_erk1_activation     | DLBC | -0.564853083 |
| UCKL1 | Marginal zone b cell      | DLBC | -0.012814816 |
| UCKL1 | Memory b cell             | DLBC | -0.294211621 |
| UCKL1 | Mesenchymal cell          | DLBC | 0.125198436  |
| UCKL1 | Mesenchymal stem cell     | DLBC | -0.158436178 |
| UCKL1 | Metabolism of xenobiotic  | DLBC | 0.449196752  |
| UCKL1 | Migrating cancer stem cel | DLBC | 0.226818208  |
| UCKL1 | Mitotic_spindle           | DLBC | -0.573610909 |
| UCKL1 | Monocyte                  | DLBC | -0.219134618 |
| UCKL1 | Mtor_signaling_pathway    | DLBC | -0.553536877 |
| UCKL1 | Mtorc1_signaling          | DLBC | -0.017873849 |

|       |                                          |      |              |
|-------|------------------------------------------|------|--------------|
| UCKL1 | Mucin type o-glycan biosynthesis         | DLBC | -0.303835886 |
| UCKL1 | Myc_targets_v1                           | DLBC | 0.198332113  |
| UCKL1 | Myeloid cell                             | DLBC | -0.330067669 |
| UCKL1 | N-glycan biosynthesis                    | DLBC | -0.027490175 |
| UCKL1 | Naive b cell                             | DLBC | 0.083036314  |
| UCKL1 | Naive cd4+ t cell                        | DLBC | -0.233931962 |
| UCKL1 | Naive cd8+ t cell                        | DLBC | -0.157616749 |
| UCKL1 | Natural killer cell                      | DLBC | -0.190462503 |
| UCKL1 | Natural killer t (nkt) cell              | DLBC | 0.067808337  |
| UCKL1 | Natural regulatory t (treg) cell         | DLBC | -0.336797135 |
| UCKL1 | Neomycin, kanamycin and streptomycin     | DLBC | 0.05308833   |
| UCKL1 | Neutrophil                               | DLBC | -0.161804319 |
| UCKL1 | Nicotinate and nicotinamide              | DLBC | 0.033326888  |
| UCKL1 | Nitrogen metabolism                      | DLBC | 0.024984984  |
| UCKL1 | Nod_like_receptor_signaling              | DLBC | -0.450585999 |
| UCKL1 | Notch_signaling                          | DLBC | 0.020937671  |
| UCKL1 | One carbon pool by folate                | DLBC | -0.067547783 |
| UCKL1 | Other glycan degradation                 | DLBC | 0.005502748  |
| UCKL1 | Other types of o-glycan biosynthesis     | DLBC | 0.312494037  |
| UCKL1 | Oxidative phosphorylation                | DLBC | 0.536437903  |
| UCKL1 | P53_pathway                              | DLBC | 0.092319654  |
| UCKL1 | P53_signaling_pathway                    | DLBC | -0.09537291  |
| UCKL1 | Pantothenate and coenzyme a biosynthesis | DLBC | 0.170596334  |
| UCKL1 | Pentose and glucuronate interconversions | DLBC | 0.389926449  |
| UCKL1 | Pentose phosphate pathway                | DLBC | 0.246147925  |
| UCKL1 | Pericyte                                 | DLBC | 0.037779204  |
| UCKL1 | Phenylalanine metabolism                 | DLBC | 0.232795201  |
| UCKL1 | Phenylalanine, tyrosine and tryptophan   | DLBC | -0.002503923 |
| UCKL1 | Phosphonate and phosphite                | DLBC | 0.022849908  |
| UCKL1 | Pi3k_akt_activation                      | DLBC | -0.376347092 |
| UCKL1 | Pi3k_akt_mtor_signaling                  | DLBC | -0.364567054 |
| UCKL1 | Porphyrin and chlorophyll biosynthesis   | DLBC | 0.465783266  |
| UCKL1 | Primary bile acid biosynthesis           | DLBC | 0.174232741  |
| UCKL1 | Propanoate metabolism                    | DLBC | 0.226007647  |
| UCKL1 | Purine metabolism                        | DLBC | 0.340323924  |
| UCKL1 | Pyrimidine metabolism                    | DLBC | 0.378030935  |
| UCKL1 | Pyruvate metabolism                      | DLBC | 0.320575472  |
| UCKL1 | Regulation_of_autophagy                  | DLBC | 0.008398446  |
| UCKL1 | Retinol metabolism                       | DLBC | 0.430204949  |
| UCKL1 | Riboflavin metabolism                    | DLBC | 0.245270507  |
| UCKL1 | Schmahl_pdgf_signaling                   | DLBC | -0.408992633 |
| UCKL1 | Selenocompound metabolism                | DLBC | -0.387927376 |
| UCKL1 | Signaling_by_hippo                       | DLBC | -0.53201911  |

|       |                            |      |              |
|-------|----------------------------|------|--------------|
| UCLK1 | Sphingolipid metabolism    | DLBC | -0.351910015 |
| UCLK1 | Starch and sucrose metabo  | DLBC | 0.368850357  |
| UCLK1 | Steroid biosynthesis       | DLBC | 0.371521951  |
| UCLK1 | Steroid hormone biosynth   | DLBC | 0.442665182  |
| UCLK1 | Sulfur metabolism          | DLBC | 0.395511944  |
| UCLK1 | Synthesis and degradation  | DLBC | 0.436643272  |
| UCLK1 | T helper cell              | DLBC | -0.255366185 |
| UCLK1 | T helper1 (th1) cell       | DLBC | -0.22354222  |
| UCLK1 | T helper17 (th17) cell     | DLBC | -0.432190982 |
| UCLK1 | T helper2 (th2) cell       | DLBC | -0.338407826 |
| UCLK1 | T helper9 (th9) cell       | DLBC | -0.191009421 |
| UCLK1 | Taurine and hypotaurine r  | DLBC | 0.172860652  |
| UCLK1 | Terpenoid backbone biosy   | DLBC | 0.445149281  |
| UCLK1 | Tgf_beta_signaling_pathw   | DLBC | -0.538278188 |
| UCLK1 | Thiamine metabolism        | DLBC | 0.359991577  |
| UCLK1 | Tnfa_signaling_via_nfk     | DLBC | -0.329913289 |
| UCLK1 | Tryptophan metabolism      | DLBC | 0.120140407  |
| UCLK1 | Tumor endothelial cell     | DLBC | 0.06906256   |
| UCLK1 | Tyrosine metabolism        | DLBC | 0.472614813  |
| UCLK1 | Ubiquinone and other ter   | DLBC | 0.567278694  |
| UCLK1 | Valine, leucine and isoleu | DLBC | 0.090721955  |
| UCLK1 | Valine, leucine and isoleu | DLBC | 0.281562175  |
| UCLK1 | Vascular endothelial cell  | DLBC | -0.022845687 |
| UCLK1 | Vascular smooth muscle c   | DLBC | -0.156105993 |
| UCLK1 | Vegf_signaling_pathway     | DLBC | -0.189500733 |
| UCLK1 | Vitamin b6 metabolism      | DLBC | 0.300463787  |
| UCLK1 | Willert_wnt_signaling      | DLBC | 0.265712571  |
| UCLK1 | Wnt_beta_catenin_signali   | DLBC | -0.396563808 |
| UPP1  | Abnormal plasma cell       | DLBC | 0.094125385  |
| UPP1  | Activated b cell           | DLBC | -0.159849631 |
| UPP1  | Activated cd4+ t cell      | DLBC | -0.311817411 |
| UPP1  | Activated t cell           | DLBC | -0.152344385 |
| UPP1  | Alanine, aspartate and glu | DLBC | -0.103350238 |
| UPP1  | Alcala_apoptosis           | DLBC | 0.384303791  |
| UPP1  | Alpha-linolenic acid meta  | DLBC | 0.56474558   |
| UPP1  | Amino sugar and nucleoti   | DLBC | 0.522769241  |
| UPP1  | Ampk_pathway               | DLBC | -0.580409487 |
| UPP1  | Angiogenesis               | DLBC | 0.446879899  |
| UPP1  | Arachidonic acid metabo    | DLBC | 0.656940816  |
| UPP1  | Arginine and proline met   | DLBC | 0.736175034  |
| UPP1  | Arginine biosynthesis      | DLBC | 0.206332706  |
| UPP1  | Ascorbate and aldarate m   | DLBC | 0.308877088  |
| UPP1  | Atypical memory b cell     | DLBC | 0.162651604  |

|      |                             |      |              |
|------|-----------------------------|------|--------------|
| UPP1 | Axl+siglec6+ dendritic ce   | DLBC | 0.022691613  |
| UPP1 | B cell                      | DLBC | -0.503591924 |
| UPP1 | B1 cell                     | DLBC | -0.196870874 |
| UPP1 | Basal cell                  | DLBC | 0.719632684  |
| UPP1 | Beta-alanine metabolism     | DLBC | 0.493518977  |
| UPP1 | Biosynthesis of unsaturate  | DLBC | 0.423605982  |
| UPP1 | Biotin metabolism           | DLBC | 0.033313553  |
| UPP1 | Butanoate metabolism        | DLBC | 0.335413091  |
| UPP1 | Caffeine metabolism         | DLBC | 0.48156651   |
| UPP1 | Cancer stem cell            | DLBC | 0.117762701  |
| UPP1 | Cancer stem-like cell       | DLBC | 0.198595107  |
| UPP1 | Cd4+ cytotoxic t cell       | DLBC | -0.024780942 |
| UPP1 | Cd4+ memory t cell          | DLBC | -0.283316381 |
| UPP1 | Cd4+ regulatory t cell      | DLBC | -0.294695936 |
| UPP1 | Cd4+ t helper cell          | DLBC | -0.204501734 |
| UPP1 | Cd4+cd25+ regulatory t c    | DLBC | -0.226417927 |
| UPP1 | Cd8+ cytotoxic t cell       | DLBC | -0.116701613 |
| UPP1 | Cd8+ regulatory t cell      | DLBC | -0.267614113 |
| UPP1 | Cell_cycle                  | DLBC | -0.478984451 |
| UPP1 | Chandran_metastasis_top5    | DLBC | -0.67372782  |
| UPP1 | Citrate cycle (tca cycle)   | DLBC | 0.14935983   |
| UPP1 | Cysteine and methionine r   | DLBC | 0.080155049  |
| UPP1 | Cytokine induced killer cε  | DLBC | -0.144621974 |
| UPP1 | D-arginine and d-ornithin   | DLBC | 0.477704557  |
| UPP1 | D-glutamine and d-glutan    | DLBC | -0.541787869 |
| UPP1 | Dendritic cell              | DLBC | 0.042249971  |
| UPP1 | Dna_repair                  | DLBC | 0.429488428  |
| UPP1 | Dna_replication             | DLBC | -0.193465542 |
| UPP1 | Double-negative memory      | DLBC | 0.165764853  |
| UPP1 | Drug metabolism - cytoch    | DLBC | 0.631917656  |
| UPP1 | Drug metabolism - other ε   | DLBC | 0.678720458  |
| UPP1 | E2f_targets                 | DLBC | -0.417129026 |
| UPP1 | Ecm_receptor_interaction    | DLBC | 0.325513506  |
| UPP1 | Effector cd4+ memory t (    | DLBC | -0.301016974 |
| UPP1 | Effector cd8+ memory t (    | DLBC | -0.140646608 |
| UPP1 | Effector memory t cell      | DLBC | -0.329637106 |
| UPP1 | Effector regulatory t (treg | DLBC | -0.400214224 |
| UPP1 | Elvidge_hif1a_targets_up    | DLBC | -0.43498864  |
| UPP1 | Endothelial cell            | DLBC | -0.014242082 |
| UPP1 | Eosinophil                  | DLBC | 0.054386345  |
| UPP1 | Ether lipid metabolism      | DLBC | 0.290084232  |
| UPP1 | Exhausted cd4+ t cell       | DLBC | -0.148761651 |
| UPP1 | Exhausted cd8+ t cell       | DLBC | -0.197320133 |

|      |                              |      |              |
|------|------------------------------|------|--------------|
| UPP1 | Exhausted t cell             | DLBC | -0.199471638 |
| UPP1 | Fat cell (adipocyte)         | DLBC | 0.415655512  |
| UPP1 | Fatty acid biosynthesis      | DLBC | -0.205490528 |
| UPP1 | Fatty acid degradation       | DLBC | 0.362008358  |
| UPP1 | Fatty acid elongation        | DLBC | 0.348868454  |
| UPP1 | Fibroblast                   | DLBC | 0.27985537   |
| UPP1 | Folate biosynthesis          | DLBC | 0.454413607  |
| UPP1 | Follicular b cell            | DLBC | -0.330561403 |
| UPP1 | Follicular dendritic cell    | DLBC | -0.240335527 |
| UPP1 | Follicular helper (tfh) t ce | DLBC | -0.226920134 |
| UPP1 | Follicular t cell            | DLBC | -0.09480078  |
| UPP1 | Foxp3+il-17+ t cell          | DLBC | -0.246617599 |
| UPP1 | Fructose and mannose me      | DLBC | 0.614315881  |
| UPP1 | G2m_checkpoint               | DLBC | -0.523182241 |
| UPP1 | Galactose metabolism         | DLBC | 0.611338672  |
| UPP1 | Galie_tumor_stemness_ge      | DLBC | -0.361004139 |
| UPP1 | Glutathione metabolism       | DLBC | 0.672027148  |
| UPP1 | Glycerolipid metabolism      | DLBC | 0.324716079  |
| UPP1 | Glycerophospholipid metæ     | DLBC | 0.533917933  |
| UPP1 | Glycine, serine and threor   | DLBC | 0.522659335  |
| UPP1 | Glycolysis / gluconeogene    | DLBC | 0.574987541  |
| UPP1 | Glycosaminoglycan biosy      | DLBC | 0.447467914  |
| UPP1 | Glycosaminoglycan biosy      | DLBC | 0.366843846  |
| UPP1 | Glycosaminoglycan biosy      | DLBC | -0.014876212 |
| UPP1 | Glycosaminoglycan degra      | DLBC | 0.470048826  |
| UPP1 | Glycosphingolipid biosyn     | DLBC | 0.295644469  |
| UPP1 | Glycosphingolipid biosyn     | DLBC | 0.592188425  |
| UPP1 | Glycosphingolipid biosyn     | DLBC | 0.633218     |
| UPP1 | Glycosylphosphatidylinos     | DLBC | 0.176265583  |
| UPP1 | Glyoxylate and dicarboxy     | DLBC | 0.34586342   |
| UPP1 | Granulocyte                  | DLBC | 0.125271859  |
| UPP1 | Hedgehog_signaling           | DLBC | -0.07838843  |
| UPP1 | Histidine metabolism         | DLBC | 0.534853623  |
| UPP1 | Hypoxia                      | DLBC | 0.602826833  |
| UPP1 | Il-17alpha t cell            | DLBC | -0.240384518 |
| UPP1 | Il2_stat5_signaling          | DLBC | 0.219325076  |
| UPP1 | Il6_jak_stat3_signaling      | DLBC | -0.101074688 |
| UPP1 | Immune_checkpoints_turr      | DLBC | 0.2482243    |
| UPP1 | Immune_inhibition_cytok      | DLBC | 0.384792207  |
| UPP1 | Inositol phosphate metabo    | DLBC | -0.493154033 |
| UPP1 | Interleukin_6_signaling      | DLBC | -0.510488333 |
| UPP1 | Jaeger_metastasis_up         | DLBC | 0.102977466  |
| UPP1 | Jain_nfkb_signaling          | DLBC | -0.455017715 |

|      |                             |      |              |
|------|-----------------------------|------|--------------|
| UPP1 | Kras_signaling_up           | DLBC | 0.246001758  |
| UPP1 | Linoleic acid metabolism    | DLBC | 0.457658817  |
| UPP1 | Lipoic acid metabolism      | DLBC | 0.15687657   |
| UPP1 | Lysine degradation          | DLBC | -0.476592424 |
| UPP1 | Lysosome                    | DLBC | 0.359564683  |
| UPP1 | M1 macrophage               | DLBC | -0.001999664 |
| UPP1 | M2 macrophage               | DLBC | -0.005564347 |
| UPP1 | Mannose type o-glycan bi    | DLBC | 0.005633963  |
| UPP1 | Mapk_signaling_pathway      | DLBC | -0.324428615 |
| UPP1 | Mapk3_erk1_activation       | DLBC | -0.550096927 |
| UPP1 | Marginal zone b cell        | DLBC | -0.098306302 |
| UPP1 | Memory b cell               | DLBC | -0.056325674 |
| UPP1 | Mesenchymal cell            | DLBC | 0.610895062  |
| UPP1 | Mesenchymal stem cell       | DLBC | 0.196193232  |
| UPP1 | Metabolism of xenobiotic    | DLBC | 0.697090353  |
| UPP1 | Migrating cancer stem cel   | DLBC | 0.559383978  |
| UPP1 | Mitotic_spindle             | DLBC | -0.740696451 |
| UPP1 | Monocyte                    | DLBC | 0.250350527  |
| UPP1 | Mtor_signaling_pathway      | DLBC | -0.536670987 |
| UPP1 | Mtorc1_signaling            | DLBC | 0.21226527   |
| UPP1 | Mucin type o-glycan biosy   | DLBC | -0.075215975 |
| UPP1 | Myc_targets_v1              | DLBC | 0.08199554   |
| UPP1 | Myeloid cell                | DLBC | -0.161219394 |
| UPP1 | N-glycan biosynthesis       | DLBC | -0.094583792 |
| UPP1 | Naive b cell                | DLBC | -0.258415555 |
| UPP1 | Naive cd4+ t cell           | DLBC | -0.338931412 |
| UPP1 | Naive cd8+ t cell           | DLBC | -0.459719776 |
| UPP1 | Natural killer cell         | DLBC | -0.102333359 |
| UPP1 | Natural killer t (nkt) cell | DLBC | -0.299428183 |
| UPP1 | Natural regulatory t (treg) | DLBC | -0.254250341 |
| UPP1 | Neomycin, kanamycin and     | DLBC | 0.392204455  |
| UPP1 | Neutrophil                  | DLBC | 0.41399      |
| UPP1 | Nicotinate and nicotinami   | DLBC | 0.320378391  |
| UPP1 | Nitrogen metabolism         | DLBC | 0.193879396  |
| UPP1 | Nod_like_receptor_signal    | DLBC | -0.231642212 |
| UPP1 | Notch_signaling             | DLBC | 0.54927584   |
| UPP1 | One carbon pool by folate   | DLBC | -0.223728755 |
| UPP1 | Other glycan degradation    | DLBC | 0.363093637  |
| UPP1 | Other types of o-glycan b   | DLBC | 0.079168109  |
| UPP1 | Oxidative phosphorylatior   | DLBC | 0.681548706  |
| UPP1 | P53_pathway                 | DLBC | 0.624176273  |
| UPP1 | P53_signaling_pathway       | DLBC | -0.063364994 |
| UPP1 | Pantothenate and coa bios   | DLBC | 0.403758362  |

|      |                            |      |              |
|------|----------------------------|------|--------------|
| UPP1 | Pentose and glucuronate i  | DLBC | 0.408465707  |
| UPP1 | Pentose phosphate pathwa   | DLBC | 0.399248321  |
| UPP1 | Pericyte                   | DLBC | 0.319891309  |
| UPP1 | Phenylalanine metabolism   | DLBC | 0.402128599  |
| UPP1 | Phenylalanine, tyrosine ar | DLBC | -0.049021905 |
| UPP1 | Phosphonate and phosphir   | DLBC | -0.026205354 |
| UPP1 | Pi3k_akt_activation        | DLBC | -0.391255787 |
| UPP1 | Pi3k_akt_mtor_signaling    | DLBC | -0.212793558 |
| UPP1 | Porphyrin and chlorophyl   | DLBC | 0.380316137  |
| UPP1 | Primary bile acid biosynt  | DLBC | 0.577903056  |
| UPP1 | Propanoate metabolism      | DLBC | 0.069895199  |
| UPP1 | Purine metabolism          | DLBC | 0.185830855  |
| UPP1 | Pyrimidine metabolism      | DLBC | 0.146708028  |
| UPP1 | Pyruvate metabolism        | DLBC | 0.421923619  |
| UPP1 | Regulation_of_autophagy    | DLBC | 0.27470392   |
| UPP1 | Retinol metabolism         | DLBC | 0.598937202  |
| UPP1 | Riboflavin metabolism      | DLBC | 0.491438329  |
| UPP1 | Schmahl_pdgf_signaling     | DLBC | -0.094258238 |
| UPP1 | Selenocompound metabol     | DLBC | -0.271554028 |
| UPP1 | Signaling_by_hippo         | DLBC | -0.475087096 |
| UPP1 | Sphingolipid metabolism    | DLBC | 0.039726477  |
| UPP1 | Starch and sucrose metabo  | DLBC | 0.509182264  |
| UPP1 | Steroid biosynthesis       | DLBC | 0.457897822  |
| UPP1 | Steroid hormone biosynth   | DLBC | 0.682673716  |
| UPP1 | Sulfur metabolism          | DLBC | 0.614226261  |
| UPP1 | Synthesis and degradation  | DLBC | 0.323314865  |
| UPP1 | T helper cell              | DLBC | -0.232604291 |
| UPP1 | T helper1 (th1) cell       | DLBC | -0.06461421  |
| UPP1 | T helper17 (th17) cell     | DLBC | -0.277251559 |
| UPP1 | T helper2 (th2) cell       | DLBC | -0.250313919 |
| UPP1 | T helper9 (th9) cell       | DLBC | -0.227448207 |
| UPP1 | Taurine and hypotaurine r  | DLBC | 0.383340558  |
| UPP1 | Terpenoid backbone biosy   | DLBC | 0.515059162  |
| UPP1 | Tgf_beta_signaling_pathw   | DLBC | -0.474141468 |
| UPP1 | Thiamine metabolism        | DLBC | 0.468384458  |
| UPP1 | Tnfa_signaling_via_nfk     | DLBC | 0.212315789  |
| UPP1 | Tryptophan metabolism      | DLBC | 0.401728196  |
| UPP1 | Tumor endothelial cell     | DLBC | 0.460551276  |
| UPP1 | Tyrosine metabolism        | DLBC | 0.54539397   |
| UPP1 | Ubiquinone and other ter   | DLBC | 0.463898269  |
| UPP1 | Valine, leucine and isoleu | DLBC | 0.635218097  |
| UPP1 | Valine, leucine and isoleu | DLBC | 0.18904726   |
| UPP1 | Vascular endothelial cell  | DLBC | 0.039151665  |



|      |                                      |      |              |
|------|--------------------------------------|------|--------------|
| UPP1 | Vascular smooth muscle c             | DLBC | 0.157756488  |
| UPP1 | Vegf_signaling_pathway               | DLBC | -0.154912437 |
| UPP1 | Vitamin b6 metabolism                | DLBC | 0.527260325  |
| UPP1 | Willert_wnt_signaling                | DLBC | 0.489175154  |
| UPP1 | Wnt_beta_catenin_signali             | DLBC | -0.460099985 |
| UPP2 | Abnormal plasma cell                 | DLBC | -0.073173847 |
| UPP2 | Activated b cell                     | DLBC | 0.216738659  |
| UPP2 | Activated cd4+ t cell                | DLBC | 0.06161316   |
| UPP2 | Activated t cell                     | DLBC | 0.221727473  |
| UPP2 | Alanine, aspartate and glu           | DLBC | -0.43880674  |
| UPP2 | Alcala_apoptosis                     | DLBC | -0.338907111 |
| UPP2 | Alpha-linolenic acid meta            | DLBC | -0.207533879 |
| UPP2 | Amino sugar and nucleoti             | DLBC | -0.195074375 |
| UPP2 | Ampk_pathway                         | DLBC | -0.253018581 |
| UPP2 | Angiogenesis                         | DLBC | -0.183237054 |
| UPP2 | Arachidonic acid metabol             | DLBC | -0.191723075 |
| UPP2 | Arginine and proline metε            | DLBC | -0.232982109 |
| UPP2 | Arginine biosynthesis                | DLBC | -0.415383448 |
| UPP2 | Ascorbate and aldarate mε            | DLBC | -0.352837511 |
| UPP2 | Atypical memory b cell               | DLBC | 0.156235151  |
| UPP2 | Axl+siglec6+ dendritic ce            | DLBC | 0.130566243  |
| UPP2 | B cell                               | DLBC | 0.012387797  |
| UPP2 | B1 cell                              | DLBC | 0.216406765  |
| UPP2 | Basal cell                           | DLBC | -0.108437633 |
| UPP2 | Beta-alanine metabolism              | DLBC | -0.209628085 |
| UPP2 | Biosynthesis of unsaturate           | DLBC | -0.374867566 |
| UPP2 | Biotin metabolism                    | DLBC | -0.202741676 |
| UPP2 | Butanoate metabolism                 | DLBC | -0.279961102 |
| UPP2 | Caffeine metabolism                  | DLBC | 0.048816772  |
| UPP2 | Cancer stem cell                     | DLBC | 0.049239812  |
| UPP2 | Cancer stem-like cell                | DLBC | -0.015450495 |
| UPP2 | Cd4+ cytotoxic t cell                | DLBC | 0.058138739  |
| UPP2 | Cd4+ memory t cell                   | DLBC | 0.26352061   |
| UPP2 | Cd4+ regulatory t cell               | DLBC | 0.072803125  |
| UPP2 | Cd4+ t helper cell                   | DLBC | 0.197185148  |
| UPP2 | Cd4+cd25+ regulatory t c             | DLBC | 0.105581013  |
| UPP2 | Cd8+ cytotoxic t cell                | DLBC | 0.088776758  |
| UPP2 | Cd8+ regulatory t cell               | DLBC | 0.085357742  |
| UPP2 | Cell_cycle                           | DLBC | -0.076186907 |
| UPP2 | Chandran_metastasis_top <sup>5</sup> | DLBC | 0.038139112  |
| UPP2 | Citrate cycle (tca cycle)            | DLBC | -0.409385419 |
| UPP2 | Cysteine and methionine r            | DLBC | -0.288818583 |
| UPP2 | Cytokine induced killer cε           | DLBC | 0.163760995  |

|      |                              |      |              |
|------|------------------------------|------|--------------|
| UPP2 | D-arginine and d-ornithin    | DLBC | 0.045277191  |
| UPP2 | D-glutamine and d-glutan     | DLBC | -0.0165963   |
| UPP2 | Dendritic cell               | DLBC | 0.380599379  |
| UPP2 | Dna_repair                   | DLBC | -0.319913214 |
| UPP2 | Dna_replication              | DLBC | -0.19381206  |
| UPP2 | Double-negative memory       | DLBC | 0.142886713  |
| UPP2 | Drug metabolism - cytoch     | DLBC | -0.208557157 |
| UPP2 | Drug metabolism - other      | DLBC | -0.338117271 |
| UPP2 | E2f_targets                  | DLBC | -0.118798878 |
| UPP2 | Ecm_receptor_interaction     | DLBC | -0.139589004 |
| UPP2 | Effector cd4+ memory t       | DLBC | 0.153150148  |
| UPP2 | Effector cd8+ memory t       | DLBC | 0.096616142  |
| UPP2 | Effector memory t cell       | DLBC | 0.263754191  |
| UPP2 | Effector regulatory t (treg  | DLBC | -0.009565944 |
| UPP2 | Elvidge_hif1a_targets_up     | DLBC | 0.082681607  |
| UPP2 | Endothelial cell             | DLBC | -0.044665794 |
| UPP2 | Eosinophil                   | DLBC | 0.192895084  |
| UPP2 | Ether lipid metabolism       | DLBC | 0.058621537  |
| UPP2 | Exhausted cd4+ t cell        | DLBC | 0.254465817  |
| UPP2 | Exhausted cd8+ t cell        | DLBC | 0.166144461  |
| UPP2 | Exhausted t cell             | DLBC | 0.153182458  |
| UPP2 | Fat cell (adipocyte)         | DLBC | -0.160812546 |
| UPP2 | Fatty acid biosynthesis      | DLBC | -0.098636541 |
| UPP2 | Fatty acid degradation       | DLBC | -0.286707632 |
| UPP2 | Fatty acid elongation        | DLBC | -0.491386115 |
| UPP2 | Fibroblast                   | DLBC | 0.001129962  |
| UPP2 | Folate biosynthesis          | DLBC | -0.189451024 |
| UPP2 | Follicular b cell            | DLBC | 0.367401229  |
| UPP2 | Follicular dendritic cell    | DLBC | 0.337338902  |
| UPP2 | Follicular helper (tfh) t ce | DLBC | 0.235112816  |
| UPP2 | Follicular t cell            | DLBC | 0.066791607  |
| UPP2 | Foxp3+il-17+ t cell          | DLBC | 0.452109741  |
| UPP2 | Fructose and mannose me      | DLBC | -0.424539947 |
| UPP2 | G2m_checkpoint               | DLBC | -0.045523081 |
| UPP2 | Galactose metabolism         | DLBC | -0.216919175 |
| UPP2 | Galie_tumor_stemness_ge      | DLBC | -0.12730004  |
| UPP2 | Glutathione metabolism       | DLBC | -0.284485264 |
| UPP2 | Glycerolipid metabolism      | DLBC | -0.071647731 |
| UPP2 | Glycerophospholipid metæ     | DLBC | -0.100517971 |
| UPP2 | Glycine, serine and threor   | DLBC | -0.389763141 |
| UPP2 | Glycolysis / gluconeogene    | DLBC | -0.246570057 |
| UPP2 | Glycosaminoglycan biosy      | DLBC | -0.183001861 |
| UPP2 | Glycosaminoglycan biosy      | DLBC | 0.132573819  |

|      |                           |      |              |
|------|---------------------------|------|--------------|
| UPP2 | Glycosaminoglycan biosyn  | DLBC | -0.09486074  |
| UPP2 | Glycosaminoglycan degra   | DLBC | -0.000599912 |
| UPP2 | Glycosphingolipid biosyn  | DLBC | 0.068707719  |
| UPP2 | Glycosphingolipid biosyn  | DLBC | -0.046748344 |
| UPP2 | Glycosphingolipid biosyn  | DLBC | -0.161941027 |
| UPP2 | Glycosylphosphatidylinos  | DLBC | -0.091919711 |
| UPP2 | Glyoxylate and dicarboxy  | DLBC | -0.349065055 |
| UPP2 | Granulocyte               | DLBC | 0.095102202  |
| UPP2 | Hedgehog_signaling        | DLBC | -0.100297341 |
| UPP2 | Histidine metabolism      | DLBC | -0.068239715 |
| UPP2 | Hypoxia                   | DLBC | -0.204251099 |
| UPP2 | Il-17ralpha t cell        | DLBC | 0.228188831  |
| UPP2 | Il2_stat5_signaling       | DLBC | 0.049712041  |
| UPP2 | Il6_jak_stat3_signaling   | DLBC | 0.143139932  |
| UPP2 | Immune_checkpoints_turr   | DLBC | -0.085923996 |
| UPP2 | Immune_inhibition_cytok   | DLBC | 0.038091052  |
| UPP2 | Inositol phosphate metabo | DLBC | 0.232959861  |
| UPP2 | Interleukin_6_signaling   | DLBC | 0.145164148  |
| UPP2 | Jaeger_metastasis_up      | DLBC | -0.345506701 |
| UPP2 | Jain_nfkb_signaling       | DLBC | -0.276546971 |
| UPP2 | Kras_signaling_up         | DLBC | -0.105415497 |
| UPP2 | Linoleic acid metabolism  | DLBC | -0.157403597 |
| UPP2 | Lipoic acid metabolism    | DLBC | 0.080133685  |
| UPP2 | Lysine degradation        | DLBC | -0.149852129 |
| UPP2 | Lysosome                  | DLBC | 0.106788848  |
| UPP2 | M1 macrophage             | DLBC | 0.024997103  |
| UPP2 | M2 macrophage             | DLBC | -0.188983161 |
| UPP2 | Mannose type o-glycan bi  | DLBC | -0.181450189 |
| UPP2 | Mapk_signaling_pathway    | DLBC | 0.034370003  |
| UPP2 | Mapk3_erk1_activation     | DLBC | 0.155506667  |
| UPP2 | Marginal zone b cell      | DLBC | 0.266249752  |
| UPP2 | Memory b cell             | DLBC | 0.39279857   |
| UPP2 | Mesenchymal cell          | DLBC | -0.111901611 |
| UPP2 | Mesenchymal stem cell     | DLBC | 0.003788913  |
| UPP2 | Metabolism of xenobiotic  | DLBC | -0.239158816 |
| UPP2 | Migrating cancer stem cel | DLBC | -0.098041454 |
| UPP2 | Mitotic_spindle           | DLBC | -0.013328641 |
| UPP2 | Monocyte                  | DLBC | 0.138254182  |
| UPP2 | Mtor_signaling_pathway    | DLBC | 0.120644897  |
| UPP2 | Mtorc1_signaling          | DLBC | -0.275718805 |
| UPP2 | Mucin type o-glycan biosy | DLBC | 0.15898153   |
| UPP2 | Myc_targets_v1            | DLBC | -0.342179529 |
| UPP2 | Myeloid cell              | DLBC | 0.186826656  |

|      |                             |      |              |
|------|-----------------------------|------|--------------|
| UPP2 | N-glycan biosynthesis       | DLBC | -0.105313933 |
| UPP2 | Naive b cell                | DLBC | 0.18994175   |
| UPP2 | Naive cd4+ t cell           | DLBC | 0.303589907  |
| UPP2 | Naive cd8+ t cell           | DLBC | 0.23319534   |
| UPP2 | Natural killer cell         | DLBC | 0.126279383  |
| UPP2 | Natural killer t (nkt) cell | DLBC | 0.044225948  |
| UPP2 | Natural regulatory t (treg) | DLBC | 0.173173984  |
| UPP2 | Neomycin, kanamycin and     | DLBC | 0.036370445  |
| UPP2 | Neutrophil                  | DLBC | 0.041828223  |
| UPP2 | Nicotinate and nicotinami   | DLBC | 0.019800727  |
| UPP2 | Nitrogen metabolism         | DLBC | -0.191790409 |
| UPP2 | Nod_like_receptor_signal    | DLBC | 0.121301381  |
| UPP2 | Notch_signaling             | DLBC | -0.078521541 |
| UPP2 | One carbon pool by folate   | DLBC | -0.27480669  |
| UPP2 | Other glycan degradation    | DLBC | 0.212648761  |
| UPP2 | Other types of o-glycan b   | DLBC | -0.052196062 |
| UPP2 | Oxidative phosphorylatio    | DLBC | -0.226346404 |
| UPP2 | P53_pathway                 | DLBC | -0.123318881 |
| UPP2 | P53_signaling_pathway       | DLBC | -0.223011318 |
| UPP2 | Pantothenate and coa bios   | DLBC | 0.068972039  |
| UPP2 | Pentose and glucuronate i   | DLBC | -0.347494444 |
| UPP2 | Pentose phosphate pathwa    | DLBC | -0.207862082 |
| UPP2 | Pericyte                    | DLBC | -0.059188123 |
| UPP2 | Phenylalanine metabolism    | DLBC | -0.346755276 |
| UPP2 | Phenylalanine, tyrosine ar  | DLBC | -0.184386823 |
| UPP2 | Phosphonate and phosphir    | DLBC | 0.3411609    |
| UPP2 | Pi3k_akt_activation         | DLBC | 0.065344269  |
| UPP2 | Pi3k_akt_mtor_signaling     | DLBC | -0.064775092 |
| UPP2 | Porphyrin and chlorophyl    | DLBC | -0.445529082 |
| UPP2 | Primary bile acid biosynt   | DLBC | 0.1168253    |
| UPP2 | Propanoate metabolism       | DLBC | -0.1584994   |
| UPP2 | Purine metabolism           | DLBC | -0.312686358 |
| UPP2 | Pyrimidine metabolism       | DLBC | -0.407404139 |
| UPP2 | Pyruvate metabolism         | DLBC | -0.32784541  |
| UPP2 | Regulation_of_autophagy     | DLBC | 0.135161344  |
| UPP2 | Retinol metabolism          | DLBC | -0.153430577 |
| UPP2 | Riboflavin metabolism       | DLBC | 0.036363427  |
| UPP2 | Schmahl_pdgf_signaling      | DLBC | 0.42341893   |
| UPP2 | Selenocompound metabol      | DLBC | 0.003538511  |
| UPP2 | Signaling_by_hippo          | DLBC | -0.070576885 |
| UPP2 | Sphingolipid metabolism     | DLBC | 0.012022648  |
| UPP2 | Starch and sucrose metabo   | DLBC | -0.161589648 |
| UPP2 | Steroid biosynthesis        | DLBC | -0.199157494 |

|      |                            |      |              |
|------|----------------------------|------|--------------|
| UPP2 | Steroid hormone biosynth   | DLBC | -0.169413358 |
| UPP2 | Sulfur metabolism          | DLBC | -0.119216457 |
| UPP2 | Synthesis and degradation  | DLBC | -0.399673983 |
| UPP2 | T helper cell              | DLBC | 0.175436521  |
| UPP2 | T helper1 (th1) cell       | DLBC | 0.20349855   |
| UPP2 | T helper17 (th17) cell     | DLBC | 0.229087311  |
| UPP2 | T helper2 (th2) cell       | DLBC | 0.20679006   |
| UPP2 | T helper9 (th9) cell       | DLBC | 0.114395099  |
| UPP2 | Taurine and hypotaurine r  | DLBC | 0.134444558  |
| UPP2 | Terpenoid backbone biosy   | DLBC | -0.355335962 |
| UPP2 | Tgf_beta_signaling_pathw   | DLBC | -0.130515015 |
| UPP2 | Thiamine metabolism        | DLBC | -0.277629881 |
| UPP2 | Tnfa_signaling_via_nfkb    | DLBC | 0.060226005  |
| UPP2 | Tryptophan metabolism      | DLBC | -0.227025254 |
| UPP2 | Tumor endothelial cell     | DLBC | -0.173981745 |
| UPP2 | Tyrosine metabolism        | DLBC | -0.369473732 |
| UPP2 | Ubiquinone and other terq  | DLBC | -0.189179836 |
| UPP2 | Valine, leucine and isoleu | DLBC | -0.180515845 |
| UPP2 | Valine, leucine and isoleu | DLBC | -0.319012873 |
| UPP2 | Vascular endothelial cell  | DLBC | -0.120793506 |
| UPP2 | Vascular smooth muscle c   | DLBC | 0.102180346  |
| UPP2 | Vegf_signaling_pathway     | DLBC | -0.004802373 |
| UPP2 | Vitamin b6 metabolism      | DLBC | -0.253361378 |
| UPP2 | Willert_wnt_signaling      | DLBC | -0.286587887 |
| UPP2 | Wnt_beta_catenin_signali   | DLBC | 0.051398496  |
| CDA  | Abnormal plasma cell       | ESCA | -0.086610379 |
| CDA  | Activated b cell           | ESCA | -0.078611461 |
| CDA  | Activated cd4+ t cell      | ESCA | -0.097004008 |
| CDA  | Activated t cell           | ESCA | -0.117422144 |
| CDA  | Alanine, aspartate and glu | ESCA | -0.128968802 |
| CDA  | Alcala_apoptosis           | ESCA | 0.016861187  |
| CDA  | Alpha-linolenic acid meta  | ESCA | 0.282684548  |
| CDA  | Amino sugar and nucleoti   | ESCA | 0.125324719  |
| CDA  | Ampk_pathway               | ESCA | -0.036504574 |
| CDA  | Angiogenesis               | ESCA | 0.08341796   |
| CDA  | Arachidonic acid metabol:  | ESCA | 0.287012221  |
| CDA  | Arginine and proline metæ  | ESCA | 0.081876099  |
| CDA  | Arginine biosynthesis      | ESCA | 0.152689343  |
| CDA  | Ascorbate and aldarate mc  | ESCA | -0.195818722 |
| CDA  | Atypical memory b cell     | ESCA | 0.008648234  |
| CDA  | Axl+siglec6+ dendritic ce  | ESCA | 0.019702617  |
| CDA  | B cell                     | ESCA | -0.163091109 |
| CDA  | B1 cell                    | ESCA | -0.118811552 |

|     |                             |      |              |
|-----|-----------------------------|------|--------------|
| CDA | Basal cell                  | ESCA | 0.356788899  |
| CDA | Beta-alanine metabolism     | ESCA | 0.145184823  |
| CDA | Biosynthesis of unsaturate  | ESCA | 0.119229598  |
| CDA | Biotin metabolism           | ESCA | -0.107145383 |
| CDA | Butanoate metabolism        | ESCA | -0.087094359 |
| CDA | Caffeine metabolism         | ESCA | 0.138485349  |
| CDA | Cancer stem cell            | ESCA | 0.068615021  |
| CDA | Cancer stem-like cell       | ESCA | -0.184553473 |
| CDA | Cd4+ cytotoxic t cell       | ESCA | 0.102801208  |
| CDA | Cd4+ memory t cell          | ESCA | -0.055363467 |
| CDA | Cd4+ regulatory t cell      | ESCA | -0.10791801  |
| CDA | Cd4+ t helper cell          | ESCA | -0.064305283 |
| CDA | Cd4+cd25+ regulatory t c    | ESCA | -0.072584269 |
| CDA | Cd8+ cytotoxic t cell       | ESCA | -0.009479049 |
| CDA | Cd8+ regulatory t cell      | ESCA | -0.086278991 |
| CDA | Cell_cycle                  | ESCA | -0.079324915 |
| CDA | Chandran_metastasis_top5    | ESCA | -0.269027607 |
| CDA | Citrate cycle (tca cycle)   | ESCA | -0.014033531 |
| CDA | Cysteine and methionine r   | ESCA | -0.135689094 |
| CDA | Cytokine induced killer c   | ESCA | -0.096000633 |
| CDA | D-arginine and d-ornithin   | ESCA | 0.062263809  |
| CDA | D-glutamine and d-glutan    | ESCA | 0.106328041  |
| CDA | Dendritic cell              | ESCA | -0.02645804  |
| CDA | Dna_repair                  | ESCA | 0.00341815   |
| CDA | Dna_replication             | ESCA | -0.180781655 |
| CDA | Double-negative memory      | ESCA | -0.050055815 |
| CDA | Drug metabolism - cytoch    | ESCA | -0.053714786 |
| CDA | Drug metabolism - other     | ESCA | 0.067071168  |
| CDA | E2f_targets                 | ESCA | -0.174513096 |
| CDA | Ecm_receptor_interaction    | ESCA | 0.050634972  |
| CDA | Effector cd4+ memory t (    | ESCA | -0.069425532 |
| CDA | Effector cd8+ memory t (    | ESCA | 0.110374921  |
| CDA | Effector memory t cell      | ESCA | -0.070696023 |
| CDA | Effector regulatory t (treg | ESCA | -0.112143289 |
| CDA | Elvidge_hif1a_targets_up    | ESCA | -0.057763126 |
| CDA | Endothelial cell            | ESCA | -0.099458183 |
| CDA | Eosinophil                  | ESCA | 0.031579264  |
| CDA | Ether lipid metabolism      | ESCA | 0.230004616  |
| CDA | Exhausted cd4+ t cell       | ESCA | 0.003939519  |
| CDA | Exhausted cd8+ t cell       | ESCA | 0.045914506  |
| CDA | Exhausted t cell            | ESCA | -0.062883156 |
| CDA | Fat cell (adipocyte)        | ESCA | 0.044829182  |
| CDA | Fatty acid biosynthesis     | ESCA | 0.058206554  |

|     |                              |      |              |
|-----|------------------------------|------|--------------|
| CDA | Fatty acid degradation       | ESCA | -0.085577466 |
| CDA | Fatty acid elongation        | ESCA | 0.274209521  |
| CDA | Fibroblast                   | ESCA | 0.031651484  |
| CDA | Folate biosynthesis          | ESCA | -0.035236462 |
| CDA | Follicular b cell            | ESCA | -0.039975411 |
| CDA | Follicular dendritic cell    | ESCA | 0.020753818  |
| CDA | Follicular helper (tfh) t ce | ESCA | 0.020011525  |
| CDA | Follicular t cell            | ESCA | -0.000325213 |
| CDA | Foxp3+il-17+ t cell          | ESCA | -0.145376085 |
| CDA | Fructose and mannose me      | ESCA | 0.105109102  |
| CDA | G2m_checkpoint               | ESCA | -0.159289577 |
| CDA | Galactose metabolism         | ESCA | 0.077523508  |
| CDA | Galie_tumor_stemness_ge      | ESCA | 0.223277273  |
| CDA | Glutathione metabolism       | ESCA | -0.029970153 |
| CDA | Glycerolipid metabolism      | ESCA | 0.035124759  |
| CDA | Glycerophospholipid metæ     | ESCA | 0.148118814  |
| CDA | Glycine, serine and threor   | ESCA | -0.012028849 |
| CDA | Glycolysis / gluconeogene    | ESCA | 0.146773648  |
| CDA | Glycosaminoglycan biosy      | ESCA | 0.02494584   |
| CDA | Glycosaminoglycan biosy      | ESCA | -0.027331556 |
| CDA | Glycosaminoglycan biosy      | ESCA | -0.086896912 |
| CDA | Glycosaminoglycan degra      | ESCA | -0.160711024 |
| CDA | Glycosphingolipid biosyn     | ESCA | -0.116099186 |
| CDA | Glycosphingolipid biosyn     | ESCA | -0.029669268 |
| CDA | Glycosphingolipid biosyn     | ESCA | 0.087633781  |
| CDA | Glycosylphosphatidylinos     | ESCA | -0.195914548 |
| CDA | Glyoxylate and dicarboxy     | ESCA | -0.219866816 |
| CDA | Granulocyte                  | ESCA | -0.068514382 |
| CDA | Hedgehog_signaling           | ESCA | 0.090144392  |
| CDA | Histidine metabolism         | ESCA | 0.138243721  |
| CDA | Hypoxia                      | ESCA | 0.362843461  |
| CDA | Il-17ralpha t cell           | ESCA | -0.037555845 |
| CDA | Il2_stat5_signaling          | ESCA | 0.167596824  |
| CDA | Il6_jak_stat3_signaling      | ESCA | 0.165539423  |
| CDA | Immune_checkpoints_tur       | ESCA | 0.05507663   |
| CDA | Immune_inhibition_cytok      | ESCA | 0.227243897  |
| CDA | Inositol phosphate metabo    | ESCA | -0.023025951 |
| CDA | Interleukin_6_signaling      | ESCA | 0.016511685  |
| CDA | Jaeger_metastasis_up         | ESCA | -0.295523069 |
| CDA | Jain_nfkb_signaling          | ESCA | -0.068142113 |
| CDA | Kras_signaling_up            | ESCA | 0.187386478  |
| CDA | Linoleic acid metabolism     | ESCA | 0.22423633   |
| CDA | Lipoic acid metabolism       | ESCA | -0.262925013 |

|     |                             |      |              |
|-----|-----------------------------|------|--------------|
| CDA | Lysine degradation          | ESCA | -0.229622706 |
| CDA | Lysosome                    | ESCA | 0.041782023  |
| CDA | M1 macrophage               | ESCA | 0.008391218  |
| CDA | M2 macrophage               | ESCA | 0.055548594  |
| CDA | Mannose type o-glycan bi    | ESCA | -0.257515254 |
| CDA | Mapk_signaling_pathway      | ESCA | 0.185963261  |
| CDA | Mapk3_erk1_activation       | ESCA | 0.155494919  |
| CDA | Marginal zone b cell        | ESCA | -0.033203573 |
| CDA | Memory b cell               | ESCA | -0.153960679 |
| CDA | Mesenchymal cell            | ESCA | 0.032717436  |
| CDA | Mesenchymal stem cell       | ESCA | -0.057086487 |
| CDA | Metabolism of xenobiotic    | ESCA | -0.066017315 |
| CDA | Migrating cancer stem cel   | ESCA | 0.293460579  |
| CDA | Mitotic_spindle             | ESCA | 0.075512679  |
| CDA | Monocyte                    | ESCA | 0.222760499  |
| CDA | Mtor_signaling_pathway      | ESCA | 0.164993845  |
| CDA | Mtorc1_signaling            | ESCA | 0.069319337  |
| CDA | Mucin type o-glycan biosy   | ESCA | 0.071837031  |
| CDA | Myc_targets_v1              | ESCA | -0.003814705 |
| CDA | Myeloid cell                | ESCA | -0.054556736 |
| CDA | N-glycan biosynthesis       | ESCA | -0.248885521 |
| CDA | Naive b cell                | ESCA | -0.025791765 |
| CDA | Naive cd4+ t cell           | ESCA | 0.021566723  |
| CDA | Naive cd8+ t cell           | ESCA | -0.033387708 |
| CDA | Natural killer cell         | ESCA | -0.038732242 |
| CDA | Natural killer t (nkt) cell | ESCA | -0.082623867 |
| CDA | Natural regulatory t (treg) | ESCA | -0.033515854 |
| CDA | Neomycin, kanamycin and     | ESCA | 0.250646116  |
| CDA | Neutrophil                  | ESCA | 0.323449364  |
| CDA | Nicotinate and nicotinami   | ESCA | 0.110668935  |
| CDA | Nitrogen metabolism         | ESCA | 0.090275112  |
| CDA | Nod_like_receptor_signal    | ESCA | 0.249452927  |
| CDA | Notch_signaling             | ESCA | 0.202334901  |
| CDA | One carbon pool by folate   | ESCA | -0.256392783 |
| CDA | Other glycan degradation    | ESCA | -0.190530812 |
| CDA | Other types of o-glycan b   | ESCA | -0.148090926 |
| CDA | Oxidative phosphorylatio    | ESCA | 0.086886025  |
| CDA | P53_pathway                 | ESCA | 0.448102976  |
| CDA | P53_signaling_pathway       | ESCA | 0.146336696  |
| CDA | Pantothenate and coa bios   | ESCA | 0.072441301  |
| CDA | Pentose and glucuronate i   | ESCA | -0.18011303  |
| CDA | Pentose phosphate pathwa    | ESCA | 0.069701697  |
| CDA | Pericyte                    | ESCA | -0.106689739 |



|     |                                 |              |
|-----|---------------------------------|--------------|
| CDA | Phenylalanine metabolism ESCA   | 0.164459971  |
| CDA | Phenylalanine, tyrosine ar ESCA | -0.090040057 |
| CDA | Phosphonate and phosphir ESCA   | -0.210238436 |
| CDA | Pi3k_akt_activation ESCA        | -0.081337537 |
| CDA | Pi3k_akt_mtor_signaling ESCA    | 0.265371179  |
| CDA | Porphyrin and chlorophyl ESCA   | -0.13681464  |
| CDA | Primary bile acid biosynt ESCA  | 0.101356497  |
| CDA | Propanoate metabolism ESCA      | -0.182224726 |
| CDA | Purine metabolism ESCA          | -0.100353356 |
| CDA | Pyrimidine metabolism ESCA      | 0.01965158   |
| CDA | Pyruvate metabolism ESCA        | -0.062676207 |
| CDA | Regulation_of_autophagy ESCA    | -0.007189891 |
| CDA | Retinol metabolism ESCA         | 0.058893762  |
| CDA | Riboflavin metabolism ESCA      | -0.14388313  |
| CDA | Schmahl_pdgf_signaling ESCA     | 0.2431041    |
| CDA | Selenocompound metabol ESCA     | -0.415355017 |
| CDA | Signaling_by_hippo ESCA         | 0.140754768  |
| CDA | Sphingolipid metabolism ESCA    | 0.126868555  |
| CDA | Starch and sucrose metabo ESCA  | 0.202272933  |
| CDA | Steroid biosynthesis ESCA       | 0.164124672  |
| CDA | Steroid hormone biosynth ESCA   | 0.041206909  |
| CDA | Sulfur metabolism ESCA          | 0.122157935  |
| CDA | Synthesis and degradation ESCA  | -0.000755004 |
| CDA | T helper cell ESCA              | -0.061402624 |
| CDA | T helper1 (th1) cell ESCA       | 0.039958654  |
| CDA | T helper17 (th17) cell ESCA     | 0.087937036  |
| CDA | T helper2 (th2) cell ESCA       | -0.034055292 |
| CDA | T helper9 (th9) cell ESCA       | -0.057054663 |
| CDA | Taurine and hypotaurine r ESCA  | -0.00866616  |
| CDA | Terpenoid backbone biosy ESCA   | 0.262181693  |
| CDA | Tgf_beta_signaling_pathw ESCA   | 0.127004346  |
| CDA | Thiamine metabolism ESCA        | 0.01206357   |
| CDA | Tnfa_signaling_via_nfkb ESCA    | 0.2520773    |
| CDA | Tryptophan metabolism ESCA      | -0.233539598 |
| CDA | Tumor endothelial cell ESCA     | 0.357438669  |
| CDA | Tyrosine metabolism ESCA        | 0.09477702   |
| CDA | Ubiquinone and other ter ESCA   | -0.162058917 |
| CDA | Valine, leucine and isoleu ESCA | 0.027042122  |
| CDA | Valine, leucine and isoleu ESCA | -0.167797376 |
| CDA | Vascular endothelial cell ESCA  | -0.094022699 |
| CDA | Vascular smooth muscle c ESCA   | -0.036390476 |
| CDA | Vegf_signaling_pathway ESCA     | 0.344849635  |
| CDA | Vitamin b6 metabolism ESCA      | -0.062645643 |

|      |                            |      |              |
|------|----------------------------|------|--------------|
| CDA  | Willert_wnt_signaling      | ESCA | -0.021705538 |
| CDA  | Wnt_beta_catenin_signali   | ESCA | 0.112199188  |
| UCK1 | Abnormal plasma cell       | ESCA | 0.15275427   |
| UCK1 | Activated b cell           | ESCA | 0.0318368    |
| UCK1 | Activated cd4+ t cell      | ESCA | 0.008497376  |
| UCK1 | Activated t cell           | ESCA | 0.047886817  |
| UCK1 | Alanine, aspartate and glu | ESCA | 0.073479322  |
| UCK1 | Alcala_apoptosis           | ESCA | 0.20766314   |
| UCK1 | Alpha-linolenic acid meta  | ESCA | -0.177117235 |
| UCK1 | Amino sugar and nucleoti   | ESCA | -0.060348042 |
| UCK1 | Ampk_pathway               | ESCA | 0.028735792  |
| UCK1 | Angiogenesis               | ESCA | -0.10154291  |
| UCK1 | Arachidonic acid metabol   | ESCA | -0.08413856  |
| UCK1 | Arginine and proline metæ  | ESCA | 0.106572276  |
| UCK1 | Arginine biosynthesis      | ESCA | -0.148730608 |
| UCK1 | Ascorbate and aldarate me  | ESCA | -0.045471535 |
| UCK1 | Atypical memory b cell     | ESCA | -0.138982627 |
| UCK1 | Axl+siglec6+ dendritic ce  | ESCA | -0.067936424 |
| UCK1 | B cell                     | ESCA | -0.127531933 |
| UCK1 | B1 cell                    | ESCA | -0.036331095 |
| UCK1 | Basal cell                 | ESCA | 0.137573539  |
| UCK1 | Beta-alanine metabolism    | ESCA | -0.092325515 |
| UCK1 | Biosynthesis of unsaturate | ESCA | 0.040938411  |
| UCK1 | Biotin metabolism          | ESCA | -0.017580197 |
| UCK1 | Butanoate metabolism       | ESCA | -0.05704146  |
| UCK1 | Caffeine metabolism        | ESCA | -0.323372953 |
| UCK1 | Cancer stem cell           | ESCA | -0.185777063 |
| UCK1 | Cancer stem-like cell      | ESCA | -0.260924963 |
| UCK1 | Cd4+ cytotoxic t cell      | ESCA | 0.094588921  |
| UCK1 | Cd4+ memory t cell         | ESCA | -0.027018844 |
| UCK1 | Cd4+ regulatory t cell     | ESCA | 0.096266119  |
| UCK1 | Cd4+ t helper cell         | ESCA | 0.021436371  |
| UCK1 | Cd4+cd25+ regulatory t c   | ESCA | 0.029421999  |
| UCK1 | Cd8+ cytotoxic t cell      | ESCA | 0.103554754  |
| UCK1 | Cd8+ regulatory t cell     | ESCA | 0.067037931  |
| UCK1 | Cell_cycle                 | ESCA | 0.196524578  |
| UCK1 | Chandran_metastasis_topç   | ESCA | -0.008360589 |
| UCK1 | Citrate cycle (tca cycle)  | ESCA | 0.023847995  |
| UCK1 | Cysteine and methionine r  | ESCA | 0.117640929  |
| UCK1 | Cytokine induced killer cæ | ESCA | 0.080168042  |
| UCK1 | D-arginine and d-ornithin  | ESCA | -0.027383425 |
| UCK1 | D-glutamine and d-glutan   | ESCA | -0.037184767 |
| UCK1 | Dendritic cell             | ESCA | -0.045126606 |

|      |                              |       |              |
|------|------------------------------|-------|--------------|
| UCK1 | Dna_repair                   | ESCA  | 0.289947405  |
| UCK1 | Dna_replication              | ESCA  | 0.268024625  |
| UCK1 | Double-negative memory       | ESCA  | -0.039197543 |
| UCK1 | Drug metabolism - cytoch     | ESCA  | -0.087130707 |
| UCK1 | Drug metabolism - other      | ESCA  | 0.10052242   |
| UCK1 | E2f_targets                  | ESCA  | 0.174212207  |
| UCK1 | Ecm_receptor_interaction     | ESCA  | -0.084826815 |
| UCK1 | Effector cd4+ memory t       | (ESCA | -0.057803364 |
| UCK1 | Effector cd8+ memory t       | (ESCA | 0.032703348  |
| UCK1 | Effector memory t cell       | ESCA  | 0.004702866  |
| UCK1 | Effector regulatory t (treg  | ESCA  | 0.011824918  |
| UCK1 | Elvidge_hif1a_targets_up     | ESCA  | -0.094577553 |
| UCK1 | Endothelial cell             | ESCA  | -0.022115422 |
| UCK1 | Eosinophil                   | ESCA  | -0.05447793  |
| UCK1 | Ether lipid metabolism       | ESCA  | -0.289378228 |
| UCK1 | Exhausted cd4+ t cell        | ESCA  | -0.063485997 |
| UCK1 | Exhausted cd8+ t cell        | ESCA  | -0.004630947 |
| UCK1 | Exhausted t cell             | ESCA  | 0.053366603  |
| UCK1 | Fat cell (adipocyte)         | ESCA  | 0.054472358  |
| UCK1 | Fatty acid biosynthesis      | ESCA  | -0.207059714 |
| UCK1 | Fatty acid degradation       | ESCA  | -0.100163446 |
| UCK1 | Fatty acid elongation        | ESCA  | 0.05654315   |
| UCK1 | Fibroblast                   | ESCA  | 0.042785389  |
| UCK1 | Folate biosynthesis          | ESCA  | 0.134237055  |
| UCK1 | Follicular b cell            | ESCA  | -0.0351837   |
| UCK1 | Follicular dendritic cell    | ESCA  | -0.110201266 |
| UCK1 | Follicular helper (tfh) t ce | ESCA  | 0.015885546  |
| UCK1 | Follicular t cell            | ESCA  | 0.062423469  |
| UCK1 | Foxp3+il-17+ t cell          | ESCA  | 0.040652648  |
| UCK1 | Fructose and mannose me      | ESCA  | -0.116106256 |
| UCK1 | G2m_checkpoint               | ESCA  | 0.095934367  |
| UCK1 | Galactose metabolism         | ESCA  | -0.009888419 |
| UCK1 | Galie_tumor_stemness_ge      | ESCA  | 0.062522629  |
| UCK1 | Glutathione metabolism       | ESCA  | 0.157416705  |
| UCK1 | Glycerolipid metabolism      | ESCA  | -0.148838606 |
| UCK1 | Glycerophospholipid met&     | ESCA  | -0.194974431 |
| UCK1 | Glycine, serine and threor   | ESCA  | 0.268804258  |
| UCK1 | Glycolysis / gluconeogene    | ESCA  | -0.026813614 |
| UCK1 | Glycosaminoglycan biosy      | ESCA  | 0.156903465  |
| UCK1 | Glycosaminoglycan biosy      | ESCA  | 0.084991497  |
| UCK1 | Glycosaminoglycan biosy      | ESCA  | -0.04783501  |
| UCK1 | Glycosaminoglycan degra      | ESCA  | -0.18782309  |
| UCK1 | Glycosphingolipid biosyn     | ESCA  | 0.076609374  |

|      |                           |      |              |
|------|---------------------------|------|--------------|
| UCK1 | Glycosphingolipid biosyn  | ESCA | -0.018143055 |
| UCK1 | Glycosphingolipid biosyn  | ESCA | -0.130421076 |
| UCK1 | Glycosylphosphatidylinos  | ESCA | 0.227697002  |
| UCK1 | Glyoxylate and dicarboxy  | ESCA | 0.134877345  |
| UCK1 | Granulocyte               | ESCA | -0.076234616 |
| UCK1 | Hedgehog_signaling        | ESCA | 0.004913481  |
| UCK1 | Histidine metabolism      | ESCA | -0.094894622 |
| UCK1 | Hypoxia                   | ESCA | 0.028319918  |
| UCK1 | Il-17alpha t cell         | ESCA | 0.023759475  |
| UCK1 | Il2_stat5_signaling       | ESCA | -0.078313268 |
| UCK1 | Il6_jak_stat3_signaling   | ESCA | -0.125562641 |
| UCK1 | Immune_checkpoints_tur    | ESCA | -0.052962842 |
| UCK1 | Immune_inhibition_cytok   | ESCA | -0.047576304 |
| UCK1 | Inositol phosphate metabo | ESCA | -0.219108135 |
| UCK1 | Interleukin_6_signaling   | ESCA | -0.224553699 |
| UCK1 | Jaeger_metastasis_up      | ESCA | 0.208734663  |
| UCK1 | Jain_nfkb_signaling       | ESCA | 0.07943127   |
| UCK1 | Kras_signaling_up         | ESCA | -0.207112097 |
| UCK1 | Linoleic acid metabolism  | ESCA | -0.216693735 |
| UCK1 | Lipoic acid metabolism    | ESCA | -0.006495545 |
| UCK1 | Lysine degradation        | ESCA | 0.080490063  |
| UCK1 | Lysosome                  | ESCA | -0.176724809 |
| UCK1 | M1 macrophage             | ESCA | 0.009978654  |
| UCK1 | M2 macrophage             | ESCA | -0.016336781 |
| UCK1 | Mannose type o-glycan bi  | ESCA | 0.234665799  |
| UCK1 | Mapk_signaling_pathway    | ESCA | -0.152214599 |
| UCK1 | Mapk3_erk1_activation     | ESCA | -0.223422252 |
| UCK1 | Marginal zone b cell      | ESCA | -0.033584603 |
| UCK1 | Memory b cell             | ESCA | 0.006573999  |
| UCK1 | Mesenchymal cell          | ESCA | 0.106613562  |
| UCK1 | Mesenchymal stem cell     | ESCA | -0.087124659 |
| UCK1 | Metabolism of xenobiotic  | ESCA | -0.007538361 |
| UCK1 | Migrating cancer stem cel | ESCA | -0.130543115 |
| UCK1 | Mitotic_spindle           | ESCA | -0.107209569 |
| UCK1 | Monocyte                  | ESCA | -0.0887994   |
| UCK1 | Mtor_signaling_pathway    | ESCA | -0.044554041 |
| UCK1 | Mtorc1_signaling          | ESCA | 0.102537226  |
| UCK1 | Mucin type o-glycan biosy | ESCA | -0.330143351 |
| UCK1 | Myc_targets_v1            | ESCA | 0.152054095  |
| UCK1 | Myeloid cell              | ESCA | -0.07135813  |
| UCK1 | N-glycan biosynthesis     | ESCA | 0.117163876  |
| UCK1 | Naive b cell              | ESCA | -0.025510766 |
| UCK1 | Naive cd4+ t cell         | ESCA | -0.066507277 |

|      |                                          |      |              |
|------|------------------------------------------|------|--------------|
| UCK1 | Naive cd8+ t cell                        | ESCA | -0.04262738  |
| UCK1 | Natural killer cell                      | ESCA | 0.003523995  |
| UCK1 | Natural killer t (nkt) cell              | ESCA | 0.076778206  |
| UCK1 | Natural regulatory t (treg)              | ESCA | 0.009039364  |
| UCK1 | Neomycin, kanamycin and                  | ESCA | -0.037833428 |
| UCK1 | Neutrophil                               | ESCA | -0.230019078 |
| UCK1 | Nicotinate and nicotinamide              | ESCA | -0.138749814 |
| UCK1 | Nitrogen metabolism                      | ESCA | -0.259587765 |
| UCK1 | Nod_like_receptor_signaling              | ESCA | -0.164469526 |
| UCK1 | Notch_signaling                          | ESCA | -0.055440308 |
| UCK1 | One carbon pool by folate                | ESCA | 0.10175528   |
| UCK1 | Other glycan degradation                 | ESCA | -0.105053002 |
| UCK1 | Other types of o-glycan biosynthesis     | ESCA | 0.178655999  |
| UCK1 | Oxidative phosphorylation                | ESCA | 0.214658349  |
| UCK1 | P53_pathway                              | ESCA | 0.038036351  |
| UCK1 | P53_signaling_pathway                    | ESCA | -0.04658623  |
| UCK1 | Pantothenate and coenzyme biosynthesis   | ESCA | -0.159919523 |
| UCK1 | Pentose and glucuronate interconversions | ESCA | -0.039876118 |
| UCK1 | Pentose phosphate pathway                | ESCA | 0.022486442  |
| UCK1 | Pericyte                                 | ESCA | -0.032679943 |
| UCK1 | Phenylalanine metabolism                 | ESCA | 0.122145093  |
| UCK1 | Phenylalanine, tyrosine and tryptophan   | ESCA | 0.118826798  |
| UCK1 | Phosphonate and phosphite metabolism     | ESCA | 0.110878824  |
| UCK1 | Pi3k_akt_activation                      | ESCA | 0.004812661  |
| UCK1 | Pi3k_akt_mtor_signaling                  | ESCA | 0.023904927  |
| UCK1 | Porphyrin and chlorophyll biosynthesis   | ESCA | 0.128487717  |
| UCK1 | Primary bile acid biosynthesis           | ESCA | -0.177111076 |
| UCK1 | Propanoate metabolism                    | ESCA | -0.141680363 |
| UCK1 | Purine metabolism                        | ESCA | 0.178492905  |
| UCK1 | Pyrimidine metabolism                    | ESCA | 0.216291715  |
| UCK1 | Pyruvate metabolism                      | ESCA | 0.074026695  |
| UCK1 | Regulation_of_autophagy                  | ESCA | 0.004101424  |
| UCK1 | Retinol metabolism                       | ESCA | -0.140832478 |
| UCK1 | Riboflavin metabolism                    | ESCA | 0.11089667   |
| UCK1 | Schmahl_pdgf_signaling                   | ESCA | -0.139041361 |
| UCK1 | Selenocompound metabolism                | ESCA | 0.014825468  |
| UCK1 | Signaling_by_hippo                       | ESCA | -0.095193079 |
| UCK1 | Sphingolipid metabolism                  | ESCA | -0.260100446 |
| UCK1 | Starch and sucrose metabolism            | ESCA | -0.155841717 |
| UCK1 | Steroid biosynthesis                     | ESCA | 0.107112465  |
| UCK1 | Steroid hormone biosynthesis             | ESCA | -0.166404037 |
| UCK1 | Sulfur metabolism                        | ESCA | -0.17160072  |
| UCK1 | Synthesis and degradation                | ESCA | -0.047583905 |

|      |                            |      |              |
|------|----------------------------|------|--------------|
| UCK1 | T helper cell              | ESCA | -0.067175022 |
| UCK1 | T helper1 (th1) cell       | ESCA | -0.043075366 |
| UCK1 | T helper17 (th17) cell     | ESCA | -0.126132338 |
| UCK1 | T helper2 (th2) cell       | ESCA | -0.114962012 |
| UCK1 | T helper9 (th9) cell       | ESCA | 0.002258575  |
| UCK1 | Taurine and hypotaurine r  | ESCA | -0.062736206 |
| UCK1 | Terpenoid backbone biosy   | ESCA | -0.099292984 |
| UCK1 | Tgf_beta_signaling_pathw   | ESCA | -0.135126071 |
| UCK1 | Thiamine metabolism        | ESCA | -0.065143053 |
| UCK1 | Tnfa_signaling_via_nfkb    | ESCA | -0.125196793 |
| UCK1 | Tryptophan metabolism      | ESCA | 0.136159398  |
| UCK1 | Tumor endothelial cell     | ESCA | 0.101263069  |
| UCK1 | Tyrosine metabolism        | ESCA | 0.090516317  |
| UCK1 | Ubiquinone and other terp  | ESCA | 0.139974542  |
| UCK1 | Valine, leucine and isoleu | ESCA | 0.089766977  |
| UCK1 | Valine, leucine and isoleu | ESCA | 0.010804489  |
| UCK1 | Vascular endothelial cell  | ESCA | -0.123140005 |
| UCK1 | Vascular smooth muscle c   | ESCA | 0.089461767  |
| UCK1 | Vegf_signaling_pathway     | ESCA | -0.215242952 |
| UCK1 | Vitamin b6 metabolism      | ESCA | 0.121067113  |
| UCK1 | Willert_wnt_signaling      | ESCA | -0.005016066 |
| UCK1 | Wnt_beta_catenin_signali   | ESCA | 0.160844499  |
| UCK2 | Abnormal plasma cell       | ESCA | -0.187340806 |
| UCK2 | Activated b cell           | ESCA | -0.267320988 |
| UCK2 | Activated cd4+ t cell      | ESCA | -0.342790375 |
| UCK2 | Activated t cell           | ESCA | -0.337670766 |
| UCK2 | Alanine, aspartate and glu | ESCA | 0.284311465  |
| UCK2 | Alcala_apoptosis           | ESCA | 0.305804168  |
| UCK2 | Alpha-linolenic acid meta  | ESCA | -0.106030129 |
| UCK2 | Amino sugar and nucleoti   | ESCA | 0.210011144  |
| UCK2 | Ampk_pathway               | ESCA | 0.214964269  |
| UCK2 | Angiogenesis               | ESCA | -0.196263538 |
| UCK2 | Arachidonic acid metabol   | ESCA | -0.205078696 |
| UCK2 | Arginine and proline metæ  | ESCA | 0.288827432  |
| UCK2 | Arginine biosynthesis      | ESCA | 0.069597622  |
| UCK2 | Ascorbate and aldarate mε  | ESCA | 0.111704156  |
| UCK2 | Atypical memory b cell     | ESCA | -0.284820523 |
| UCK2 | Axl+siglec6+ dendritic ce  | ESCA | -0.479187    |
| UCK2 | B cell                     | ESCA | -0.361760677 |
| UCK2 | B1 cell                    | ESCA | -0.229780015 |
| UCK2 | Basal cell                 | ESCA | 0.010490814  |
| UCK2 | Beta-alanine metabolism    | ESCA | -0.012836366 |
| UCK2 | Biosynthesis of unsaturate | ESCA | 0.273672348  |

|      |                             |      |              |
|------|-----------------------------|------|--------------|
| UCK2 | Biotin metabolism           | ESCA | 0.133945896  |
| UCK2 | Butanoate metabolism        | ESCA | 0.14354873   |
| UCK2 | Caffeine metabolism         | ESCA | -0.066306535 |
| UCK2 | Cancer stem cell            | ESCA | -0.379863371 |
| UCK2 | Cancer stem-like cell       | ESCA | -0.126715529 |
| UCK2 | Cd4+ cytotoxic t cell       | ESCA | -0.390842011 |
| UCK2 | Cd4+ memory t cell          | ESCA | -0.384288465 |
| UCK2 | Cd4+ regulatory t cell      | ESCA | -0.328446332 |
| UCK2 | Cd4+ t helper cell          | ESCA | -0.411245287 |
| UCK2 | Cd4+cd25+ regulatory t c    | ESCA | -0.392610545 |
| UCK2 | Cd8+ cytotoxic t cell       | ESCA | -0.278615004 |
| UCK2 | Cd8+ regulatory t cell      | ESCA | -0.309215551 |
| UCK2 | Cell_cycle                  | ESCA | 0.419566399  |
| UCK2 | Chandran_metastasis_top     | ESCA | 0.222254519  |
| UCK2 | Citrate cycle (tca cycle)   | ESCA | 0.313238349  |
| UCK2 | Cysteine and methionine r   | ESCA | 0.485159988  |
| UCK2 | Cytokine induced killer c   | ESCA | -0.389170541 |
| UCK2 | D-arginine and d-ornithin   | ESCA | 0.099722459  |
| UCK2 | D-glutamine and d-glutan    | ESCA | -0.024415648 |
| UCK2 | Dendritic cell              | ESCA | -0.38330982  |
| UCK2 | Dna_repair                  | ESCA | 0.527664682  |
| UCK2 | Dna_replication             | ESCA | 0.488580326  |
| UCK2 | Double-negative memory      | ESCA | -0.319779338 |
| UCK2 | Drug metabolism - cytoch    | ESCA | -0.077622989 |
| UCK2 | Drug metabolism - other     | ESCA | 0.372137072  |
| UCK2 | E2f_targets                 | ESCA | 0.501523865  |
| UCK2 | Ecm_receptor_interaction    | ESCA | -0.270634432 |
| UCK2 | Effector cd4+ memory t      | ESCA | -0.434607179 |
| UCK2 | Effector cd8+ memory t      | ESCA | -0.410780056 |
| UCK2 | Effector memory t cell      | ESCA | -0.403478188 |
| UCK2 | Effector regulatory t (treg | ESCA | -0.344793743 |
| UCK2 | Elvidge_hif1a_targets_up    | ESCA | 0.308349393  |
| UCK2 | Endothelial cell            | ESCA | -0.296912775 |
| UCK2 | Eosinophil                  | ESCA | -0.396788557 |
| UCK2 | Ether lipid metabolism      | ESCA | -0.26850193  |
| UCK2 | Exhausted cd4+ t cell       | ESCA | -0.477859051 |
| UCK2 | Exhausted cd8+ t cell       | ESCA | -0.450895422 |
| UCK2 | Exhausted t cell            | ESCA | -0.337966639 |
| UCK2 | Fat cell (adipocyte)        | ESCA | -0.042163142 |
| UCK2 | Fatty acid biosynthesis     | ESCA | -0.010631935 |
| UCK2 | Fatty acid degradation      | ESCA | 0.068759428  |
| UCK2 | Fatty acid elongation       | ESCA | 0.366944314  |
| UCK2 | Fibroblast                  | ESCA | -0.320595844 |

|      |                              |      |              |
|------|------------------------------|------|--------------|
| UCK2 | Folate biosynthesis          | ESCA | 0.264952897  |
| UCK2 | Follicular b cell            | ESCA | -0.401804825 |
| UCK2 | Follicular dendritic cell    | ESCA | -0.306781566 |
| UCK2 | Follicular helper (tfh) t ce | ESCA | -0.367913328 |
| UCK2 | Follicular t cell            | ESCA | -0.175570291 |
| UCK2 | Foxp3+il-17+ t cell          | ESCA | -0.256898837 |
| UCK2 | Fructose and mannose me      | ESCA | 0.189710215  |
| UCK2 | G2m_checkpoint               | ESCA | 0.453729094  |
| UCK2 | Galactose metabolism         | ESCA | 0.249953663  |
| UCK2 | Galie_tumor_stemness_ge      | ESCA | -0.295382058 |
| UCK2 | Glutathione metabolism       | ESCA | 0.378184001  |
| UCK2 | Glycerolipid metabolism      | ESCA | 0.019254269  |
| UCK2 | Glycerophospholipid metæ     | ESCA | -0.073871932 |
| UCK2 | Glycine, serine and threor   | ESCA | 0.184186283  |
| UCK2 | Glycolysis / gluconeogene    | ESCA | 0.231439204  |
| UCK2 | Glycosaminoglycan biosy1     | ESCA | -0.009021391 |
| UCK2 | Glycosaminoglycan biosy1     | ESCA | 0.091785196  |
| UCK2 | Glycosaminoglycan biosy1     | ESCA | 0.048302632  |
| UCK2 | Glycosaminoglycan degra      | ESCA | -0.142883062 |
| UCK2 | Glycosphingolipid biosyn1    | ESCA | -0.185840929 |
| UCK2 | Glycosphingolipid biosyn1    | ESCA | -0.105985182 |
| UCK2 | Glycosphingolipid biosyn1    | ESCA | -0.03956003  |
| UCK2 | Glycosylphosphatidylinos     | ESCA | 0.324647364  |
| UCK2 | Glyoxylate and dicarboxy     | ESCA | 0.322392121  |
| UCK2 | Granulocyte                  | ESCA | -0.326914311 |
| UCK2 | Hedgehog_signaling           | ESCA | -0.312537442 |
| UCK2 | Histidine metabolism         | ESCA | -0.099435636 |
| UCK2 | Hypoxia                      | ESCA | -0.079745733 |
| UCK2 | Il-17ralpha t cell           | ESCA | -0.396675054 |
| UCK2 | Il2_stat5_signaling          | ESCA | -0.379700277 |
| UCK2 | Il6_jak_stat3_signaling      | ESCA | -0.389844778 |
| UCK2 | Immune_checkpoints_turr      | ESCA | -0.260227151 |
| UCK2 | Immune_inhibition_cytok      | ESCA | -0.317821608 |
| UCK2 | Inositol phosphate metabo    | ESCA | -0.367758938 |
| UCK2 | Interleukin_6_signaling      | ESCA | -0.312279836 |
| UCK2 | Jaeger_metastasis_up         | ESCA | 0.237855919  |
| UCK2 | Jain_nfkb_signaling          | ESCA | 0.520823032  |
| UCK2 | Kras_signaling_up            | ESCA | -0.452338382 |
| UCK2 | Linoleic acid metabolism     | ESCA | -0.150938167 |
| UCK2 | Lipoic acid metabolism       | ESCA | 0.214121323  |
| UCK2 | Lysine degradation           | ESCA | 0.321727663  |
| UCK2 | Lysosome                     | ESCA | -0.200876764 |
| UCK2 | M1 macrophage                | ESCA | -0.366660842 |



|      |                             |      |              |
|------|-----------------------------|------|--------------|
| UCK2 | M2 macrophage               | ESCA | -0.319796627 |
| UCK2 | Mannose type o-glycan bi    | ESCA | 0.152257477  |
| UCK2 | Mapk_signaling_pathway      | ESCA | -0.294752507 |
| UCK2 | Mapk3_erk1_activation       | ESCA | -0.161507969 |
| UCK2 | Marginal zone b cell        | ESCA | -0.412800652 |
| UCK2 | Memory b cell               | ESCA | -0.345931423 |
| UCK2 | Mesenchymal cell            | ESCA | -0.166693688 |
| UCK2 | Mesenchymal stem cell       | ESCA | -0.377158087 |
| UCK2 | Metabolism of xenobiotic    | ESCA | 0.035419902  |
| UCK2 | Migrating cancer stem cel   | ESCA | 0.026427631  |
| UCK2 | Mitotic_spindle             | ESCA | 0.010160773  |
| UCK2 | Monocyte                    | ESCA | -0.393852019 |
| UCK2 | Mtor_signaling_pathway      | ESCA | -0.045500978 |
| UCK2 | Mtorc1_signaling            | ESCA | 0.439442764  |
| UCK2 | Mucin type o-glycan bios    | ESCA | -0.199658114 |
| UCK2 | Myc_targets_v1              | ESCA | 0.580757032  |
| UCK2 | Myeloid cell                | ESCA | -0.421913998 |
| UCK2 | N-glycan biosynthesis       | ESCA | 0.254356117  |
| UCK2 | Naive b cell                | ESCA | -0.232162387 |
| UCK2 | Naive cd4+ t cell           | ESCA | -0.449512365 |
| UCK2 | Naive cd8+ t cell           | ESCA | -0.320294433 |
| UCK2 | Natural killer cell         | ESCA | -0.417436162 |
| UCK2 | Natural killer t (nkt) cell | ESCA | -0.027354986 |
| UCK2 | Natural regulatory t (treg) | ESCA | -0.473144487 |
| UCK2 | Neomycin, kanamycin an      | ESCA | 0.045950667  |
| UCK2 | Neutrophil                  | ESCA | -0.266380538 |
| UCK2 | Nicotinate and nicotinami   | ESCA | -0.152495364 |
| UCK2 | Nitrogen metabolism         | ESCA | -0.06787834  |
| UCK2 | Nod_like_receptor_signal    | ESCA | -0.291657949 |
| UCK2 | Notch_signaling             | ESCA | -0.105381971 |
| UCK2 | One carbon pool by folate   | ESCA | 0.448172303  |
| UCK2 | Other glycan degradation    | ESCA | 0.014178871  |
| UCK2 | Other types of o-glycan b   | ESCA | 0.051834637  |
| UCK2 | Oxidative phosphorylatio    | ESCA | 0.348312041  |
| UCK2 | P53_pathway                 | ESCA | -0.009991808 |
| UCK2 | P53_signaling_pathway       | ESCA | 0.008905422  |
| UCK2 | Pantothenate and coa bios   | ESCA | -0.029077606 |
| UCK2 | Pentose and glucuronate i   | ESCA | 0.170655083  |
| UCK2 | Pentose phosphate pathwa    | ESCA | 0.342471644  |
| UCK2 | Pericyte                    | ESCA | -0.259346742 |
| UCK2 | Phenylalanine metabolism    | ESCA | -0.045847829 |
| UCK2 | Phenylalanine, tyrosine ar  | ESCA | 0.20524511   |
| UCK2 | Phosphonate and phosphir    | ESCA | 0.144757764  |

|       |                            |      |              |
|-------|----------------------------|------|--------------|
| UCK2  | Pi3k_akt_activation        | ESCA | -0.059489024 |
| UCK2  | Pi3k_akt_mtor_signaling    | ESCA | 0.085984182  |
| UCK2  | Porphyrin and chlorophyl   | ESCA | 0.303745915  |
| UCK2  | Primary bile acid biosynt  | ESCA | -0.188530383 |
| UCK2  | Propanoate metabolism      | ESCA | 0.099630355  |
| UCK2  | Purine metabolism          | ESCA | 0.576353383  |
| UCK2  | Pyrimidine metabolism      | ESCA | 0.582178614  |
| UCK2  | Pyruvate metabolism        | ESCA | 0.347123067  |
| UCK2  | Regulation_of_autophagy    | ESCA | -0.192434264 |
| UCK2  | Retinol metabolism         | ESCA | -0.092669522 |
| UCK2  | Riboflavin metabolism      | ESCA | 0.192031057  |
| UCK2  | Schmahl_pdgf_signaling     | ESCA | -0.379097104 |
| UCK2  | Selenocompound metabol     | ESCA | 0.301997103  |
| UCK2  | Signaling_by_hippo         | ESCA | -0.048595734 |
| UCK2  | Sphingolipid metabolism    | ESCA | -0.087681241 |
| UCK2  | Starch and sucrose metabo  | ESCA | 0.012311698  |
| UCK2  | Steroid biosynthesis       | ESCA | 0.255309837  |
| UCK2  | Steroid hormone biosynth   | ESCA | 0.058374386  |
| UCK2  | Sulfur metabolism          | ESCA | 0.039241652  |
| UCK2  | Synthesis and degradation  | ESCA | 0.185432246  |
| UCK2  | T helper cell              | ESCA | -0.408744661 |
| UCK2  | T helper1 (th1) cell       | ESCA | -0.378109763 |
| UCK2  | T helper17 (th17) cell     | ESCA | -0.356158685 |
| UCK2  | T helper2 (th2) cell       | ESCA | -0.400443866 |
| UCK2  | T helper9 (th9) cell       | ESCA | -0.374291025 |
| UCK2  | Taurine and hypotaurine r  | ESCA | -0.159692251 |
| UCK2  | Terpenoid backbone biosy   | ESCA | 0.312244178  |
| UCK2  | Tgf_beta_signaling_pathw   | ESCA | -0.269069726 |
| UCK2  | Thiamine metabolism        | ESCA | 0.102350201  |
| UCK2  | Tnfa_signaling_via_nfb     | ESCA | -0.226594497 |
| UCK2  | Tryptophan metabolism      | ESCA | 0.060349561  |
| UCK2  | Tumor endothelial cell     | ESCA | 0.034523476  |
| UCK2  | Tyrosine metabolism        | ESCA | -0.081667703 |
| UCK2  | Ubiquinone and other ter   | ESCA | 0.433605067  |
| UCK2  | Valine, leucine and isoleu | ESCA | -0.006642492 |
| UCK2  | Valine, leucine and isoleu | ESCA | 0.202067044  |
| UCK2  | Vascular endothelial cell  | ESCA | -0.250362023 |
| UCK2  | Vascular smooth muscle c   | ESCA | -0.314839514 |
| UCK2  | Vegf_signaling_pathway     | ESCA | -0.144445557 |
| UCK2  | Vitamin b6 metabolism      | ESCA | 0.215671209  |
| UCK2  | Willert_wnt_signaling      | ESCA | 0.104502544  |
| UCK2  | Wnt_beta_catenin_signali   | ESCA | 0.068520894  |
| UCKL1 | Abnormal plasma cell       | ESCA | -0.302123378 |

|       |                            |      |              |
|-------|----------------------------|------|--------------|
| UCKL1 | Activated b cell           | ESCA | -0.11428704  |
| UCKL1 | Activated cd4+ t cell      | ESCA | -0.078318993 |
| UCKL1 | Activated t cell           | ESCA | -0.053428853 |
| UCKL1 | Alanine, aspartate and glu | ESCA | 0.016472862  |
| UCKL1 | Alcala_apoptosis           | ESCA | -0.053059806 |
| UCKL1 | Alpha-linolenic acid meta  | ESCA | -0.099481627 |
| UCKL1 | Amino sugar and nucleoti   | ESCA | -0.136388751 |
| UCKL1 | Ampk_pathway               | ESCA | 0.118208321  |
| UCKL1 | Angiogenesis               | ESCA | -0.123074499 |
| UCKL1 | Arachidonic acid metabol   | ESCA | -0.260691807 |
| UCKL1 | Arginine and proline metæ  | ESCA | -0.097479712 |
| UCKL1 | Arginine biosynthesis      | ESCA | -0.045514832 |
| UCKL1 | Ascorbate and aldarate mε  | ESCA | -0.081844905 |
| UCKL1 | Atypical memory b cell     | ESCA | -0.039993943 |
| UCKL1 | Axl+siglec6+ dendritic ce  | ESCA | -0.132209576 |
| UCKL1 | B cell                     | ESCA | -0.023270792 |
| UCKL1 | B1 cell                    | ESCA | -0.030465709 |
| UCKL1 | Basal cell                 | ESCA | -0.22315152  |
| UCKL1 | Beta-alanine metabolism    | ESCA | -0.053675145 |
| UCKL1 | Biosynthesis of unsaturate | ESCA | -0.045932788 |
| UCKL1 | Biotin metabolism          | ESCA | 0.083086835  |
| UCKL1 | Butanoate metabolism       | ESCA | 0.06114307   |
| UCKL1 | Caffeine metabolism        | ESCA | 0.127026647  |
| UCKL1 | Cancer stem cell           | ESCA | -0.139884205 |
| UCKL1 | Cancer stem-like cell      | ESCA | 0.069538517  |
| UCKL1 | Cd4+ cytotoxic t cell      | ESCA | -0.219957677 |
| UCKL1 | Cd4+ memory t cell         | ESCA | -0.127883495 |
| UCKL1 | Cd4+ regulatory t cell     | ESCA | -0.017015634 |
| UCKL1 | Cd4+ t helper cell         | ESCA | -0.036658866 |
| UCKL1 | Cd4+cd25+ regulatory t c   | ESCA | -0.037192095 |
| UCKL1 | Cd8+ cytotoxic t cell      | ESCA | -0.077883575 |
| UCKL1 | Cd8+ regulatory t cell     | ESCA | -0.050964915 |
| UCKL1 | Cell_cycle                 | ESCA | -0.01824453  |
| UCKL1 | Chandran_metastasis_top5   | ESCA | 0.103249882  |
| UCKL1 | Citrate cycle (tca cycle)  | ESCA | -0.011220132 |
| UCKL1 | Cysteine and methionine r  | ESCA | 0.023732294  |
| UCKL1 | Cytokine induced killer cε | ESCA | -0.108636006 |
| UCKL1 | D-arginine and d-ornithin  | ESCA | 0.050412229  |
| UCKL1 | D-glutamine and d-glutan   | ESCA | -0.122859765 |
| UCKL1 | Dendritic cell             | ESCA | -0.07298679  |
| UCKL1 | Dna_repair                 | ESCA | 0.048905192  |
| UCKL1 | Dna_replication            | ESCA | 0.001324254  |
| UCKL1 | Double-negative memory     | ESCA | -0.057782157 |

|       |                              |       |              |
|-------|------------------------------|-------|--------------|
| UCKL1 | Drug metabolism - cytoch     | ESCA  | -0.130647681 |
| UCKL1 | Drug metabolism - other      | ESCA  | -0.064726297 |
| UCKL1 | E2f_targets                  | ESCA  | 0.038445071  |
| UCKL1 | Ecm_receptor_interaction     | ESCA  | -0.125714023 |
| UCKL1 | Effector cd4+ memory t       | (ESCA | -0.047010921 |
| UCKL1 | Effector cd8+ memory t       | (ESCA | -0.180015717 |
| UCKL1 | Effector memory t cell       | ESCA  | -0.082301571 |
| UCKL1 | Effector regulatory t (treg  | ESCA  | -0.059421588 |
| UCKL1 | Elvidge_hif1a_targets_up     | ESCA  | 0.042999735  |
| UCKL1 | Endothelial cell             | ESCA  | -0.168692456 |
| UCKL1 | Eosinophil                   | ESCA  | -0.097517833 |
| UCKL1 | Ether lipid metabolism       | ESCA  | -0.081463852 |
| UCKL1 | Exhausted cd4+ t cell        | ESCA  | -0.119491668 |
| UCKL1 | Exhausted cd8+ t cell        | ESCA  | -0.110305588 |
| UCKL1 | Exhausted t cell             | ESCA  | -0.028724224 |
| UCKL1 | Fat cell (adipocyte)         | ESCA  | 0.059982149  |
| UCKL1 | Fatty acid biosynthesis      | ESCA  | 0.047545982  |
| UCKL1 | Fatty acid degradation       | ESCA  | 0.014584048  |
| UCKL1 | Fatty acid elongation        | ESCA  | -0.008652643 |
| UCKL1 | Fibroblast                   | ESCA  | -0.167400966 |
| UCKL1 | Folate biosynthesis          | ESCA  | -0.102107991 |
| UCKL1 | Follicular b cell            | ESCA  | -0.091764327 |
| UCKL1 | Follicular dendritic cell    | ESCA  | -0.119168659 |
| UCKL1 | Follicular helper (tfh) t ce | ESCA  | -0.155881015 |
| UCKL1 | Follicular t cell            | ESCA  | 0.017835457  |
| UCKL1 | Foxp3+il-17+ t cell          | ESCA  | 0.041036154  |
| UCKL1 | Fructose and mannose me      | ESCA  | 0.023226882  |
| UCKL1 | G2m_checkpoint               | ESCA  | 0.012309102  |
| UCKL1 | Galactose metabolism         | ESCA  | -0.019698079 |
| UCKL1 | Galie_tumor_stemness_ge      | ESCA  | -0.23576557  |
| UCKL1 | Glutathione metabolism       | ESCA  | -0.117158664 |
| UCKL1 | Glycerolipid metabolism      | ESCA  | 0.075304925  |
| UCKL1 | Glycerophospholipid met      | ESCA  | -0.011805249 |
| UCKL1 | Glycine, serine and threor   | ESCA  | -0.048108267 |
| UCKL1 | Glycolysis / gluconeogene    | ESCA  | -0.016742085 |
| UCKL1 | Glycosaminoglycan biosy      | ESCA  | -0.135231543 |
| UCKL1 | Glycosaminoglycan biosy      | ESCA  | -0.185892208 |
| UCKL1 | Glycosaminoglycan biosy      | ESCA  | -0.110291322 |
| UCKL1 | Glycosaminoglycan degra      | ESCA  | -0.042841782 |
| UCKL1 | Glycosphingolipid biosyn     | ESCA  | -0.15304165  |
| UCKL1 | Glycosphingolipid biosyn     | ESCA  | -0.133043171 |
| UCKL1 | Glycosphingolipid biosyn     | ESCA  | -0.151979479 |
| UCKL1 | Glycosylphosphatidylinos     | ESCA  | 0.051261517  |

|       |                             |      |              |
|-------|-----------------------------|------|--------------|
| UCKL1 | Glyoxylate and dicarboxy    | ESCA | 0.014648179  |
| UCKL1 | Granulocyte                 | ESCA | -0.016734301 |
| UCKL1 | Hedgehog_signaling          | ESCA | -0.256385626 |
| UCKL1 | Histidine metabolism        | ESCA | -0.081101436 |
| UCKL1 | Hypoxia                     | ESCA | -0.253300289 |
| UCKL1 | Il-17alpha t cell           | ESCA | -0.101126843 |
| UCKL1 | Il2_stat5_signaling         | ESCA | -0.242688785 |
| UCKL1 | Il6_jak_stat3_signaling     | ESCA | -0.149699449 |
| UCKL1 | Immune_checkpoints_turr     | ESCA | -0.111373858 |
| UCKL1 | Immune_inhibition_cytok     | ESCA | -0.084075684 |
| UCKL1 | Inositol phosphate metabo   | ESCA | -0.118740797 |
| UCKL1 | Interleukin_6_signaling     | ESCA | -0.193250329 |
| UCKL1 | Jaeger_metastasis_up        | ESCA | -0.005425831 |
| UCKL1 | Jain_nfkb_signaling         | ESCA | 0.01329388   |
| UCKL1 | Kras_signaling_up           | ESCA | -0.202049085 |
| UCKL1 | Linoleic acid metabolism    | ESCA | -0.09834447  |
| UCKL1 | Lipoic acid metabolism      | ESCA | 0.082273491  |
| UCKL1 | Lysine degradation          | ESCA | 0.159367411  |
| UCKL1 | Lysosome                    | ESCA | -0.094200833 |
| UCKL1 | M1 macrophage               | ESCA | -0.12286839  |
| UCKL1 | M2 macrophage               | ESCA | -0.152139505 |
| UCKL1 | Mannose type o-glycan bi    | ESCA | 0.134872416  |
| UCKL1 | Mapk_signaling_pathway      | ESCA | -0.263223207 |
| UCKL1 | Mapk3_erk1_activation       | ESCA | -0.192292019 |
| UCKL1 | Marginal zone b cell        | ESCA | -0.085133373 |
| UCKL1 | Memory b cell               | ESCA | -0.116613357 |
| UCKL1 | Mesenchymal cell            | ESCA | -0.168352698 |
| UCKL1 | Mesenchymal stem cell       | ESCA | -0.082016376 |
| UCKL1 | Metabolism of xenobiotic    | ESCA | -0.154089587 |
| UCKL1 | Migrating cancer stem cel   | ESCA | -0.008403419 |
| UCKL1 | Mitotic_spindle             | ESCA | -0.070488655 |
| UCKL1 | Monocyte                    | ESCA | -0.14911179  |
| UCKL1 | Mtor_signaling_pathway      | ESCA | -0.244539365 |
| UCKL1 | Mtorc1_signaling            | ESCA | -0.150256389 |
| UCKL1 | Mucin type o-glycan biosy   | ESCA | -0.006270718 |
| UCKL1 | Myc_targets_v1              | ESCA | 0.038569195  |
| UCKL1 | Myeloid cell                | ESCA | -0.079720868 |
| UCKL1 | N-glycan biosynthesis       | ESCA | 0.114643075  |
| UCKL1 | Naive b cell                | ESCA | -0.140588347 |
| UCKL1 | Naive cd4+ t cell           | ESCA | -0.11419051  |
| UCKL1 | Naive cd8+ t cell           | ESCA | -0.117576408 |
| UCKL1 | Natural killer cell         | ESCA | -0.080972603 |
| UCKL1 | Natural killer t (nkt) cell | ESCA | -0.004821589 |

|       |                             |      |              |
|-------|-----------------------------|------|--------------|
| UCKL1 | Natural regulatory t (treg) | ESCA | -0.127454487 |
| UCKL1 | Neomycin, kanamycin and     | ESCA | -0.207644346 |
| UCKL1 | Neutrophil                  | ESCA | -0.13291389  |
| UCKL1 | Nicotinate and nicotinami   | ESCA | -0.190213555 |
| UCKL1 | Nitrogen metabolism         | ESCA | 0.034937994  |
| UCKL1 | Nod_like_receptor_signal    | ESCA | -0.146701012 |
| UCKL1 | Notch_signaling             | ESCA | -0.153940745 |
| UCKL1 | One carbon pool by folate   | ESCA | 0.113297545  |
| UCKL1 | Other glycan degradation    | ESCA | 0.096207648  |
| UCKL1 | Other types of o-glycan b   | ESCA | 0.306487809  |
| UCKL1 | Oxidative phosphorylatio    | ESCA | -0.076732549 |
| UCKL1 | P53_pathway                 | ESCA | -0.260434885 |
| UCKL1 | P53_signaling_pathway       | ESCA | -0.195008871 |
| UCKL1 | Pantothenate and coa bios   | ESCA | 0.04918298   |
| UCKL1 | Pentose and glucuronate i   | ESCA | -0.105340579 |
| UCKL1 | Pentose phosphate pathwa    | ESCA | -0.060917348 |
| UCKL1 | Pericyte                    | ESCA | -0.08012217  |
| UCKL1 | Phenylalanine metabolism    | ESCA | -0.178782083 |
| UCKL1 | Phenylalanine, tyrosine ar  | ESCA | 0.035540197  |
| UCKL1 | Phosphonate and phosphir    | ESCA | -0.01598928  |
| UCKL1 | Pi3k_akt_activation         | ESCA | -0.232666753 |
| UCKL1 | Pi3k_akt_mtor_signaling     | ESCA | -0.269328919 |
| UCKL1 | Porphyrin and chlorophyl    | ESCA | -0.080070158 |
| UCKL1 | Primary bile acid biosynt   | ESCA | -0.01246617  |
| UCKL1 | Propanoate metabolism       | ESCA | 0.0243971    |
| UCKL1 | Purine metabolism           | ESCA | 0.011159862  |
| UCKL1 | Pyrimidine metabolism       | ESCA | 0.06764057   |
| UCKL1 | Pyruvate metabolism         | ESCA | 0.039626125  |
| UCKL1 | Regulation_of_autophagy     | ESCA | -0.015017903 |
| UCKL1 | Retinol metabolism          | ESCA | -0.202038671 |
| UCKL1 | Riboflavin metabolism       | ESCA | 0.08654579   |
| UCKL1 | Schmahl_pdgf_signaling      | ESCA | -0.308890501 |
| UCKL1 | Selenocompound metabol      | ESCA | 0.078584421  |
| UCKL1 | Signaling_by_hippo          | ESCA | -0.026936206 |
| UCKL1 | Sphingolipid metabolism     | ESCA | 0.027963617  |
| UCKL1 | Starch and sucrose metabo   | ESCA | -0.148874302 |
| UCKL1 | Steroid biosynthesis        | ESCA | -0.054888971 |
| UCKL1 | Steroid hormone biosynth    | ESCA | -0.16043318  |
| UCKL1 | Sulfur metabolism           | ESCA | 0.003120616  |
| UCKL1 | Synthesis and degradation   | ESCA | 0.024884116  |
| UCKL1 | T helper cell               | ESCA | -0.065463543 |
| UCKL1 | T helper1 (th1) cell        | ESCA | -0.03850751  |
| UCKL1 | T helper17 (th17) cell      | ESCA | -0.126563233 |

|       |                            |      |              |
|-------|----------------------------|------|--------------|
| UCKL1 | T helper2 (th2) cell       | ESCA | -0.052040974 |
| UCKL1 | T helper9 (th9) cell       | ESCA | -0.022517167 |
| UCKL1 | Taurine and hypotaurine r  | ESCA | 0.143523198  |
| UCKL1 | Terpenoid backbone biosy   | ESCA | -0.01668268  |
| UCKL1 | Tgf_beta_signaling_pathw   | ESCA | -0.198652043 |
| UCKL1 | Thiamine metabolism        | ESCA | 0.173123366  |
| UCKL1 | Tnfa_signaling_via_nfk     | ESCA | -0.233447553 |
| UCKL1 | Tryptophan metabolism      | ESCA | -0.006600809 |
| UCKL1 | Tumor endothelial cell     | ESCA | -0.20098625  |
| UCKL1 | Tyrosine metabolism        | ESCA | -0.249316483 |
| UCKL1 | Ubiquinone and other ter   | ESCA | 0.055529983  |
| UCKL1 | Valine, leucine and isoleu | ESCA | -0.030311802 |
| UCKL1 | Valine, leucine and isoleu | ESCA | 0.04990405   |
| UCKL1 | Vascular endothelial cell  | ESCA | -0.054720504 |
| UCKL1 | Vascular smooth muscle c   | ESCA | -0.131266666 |
| UCKL1 | Vegf_signaling_pathway     | ESCA | -0.260706211 |
| UCKL1 | Vitamin b6 metabolism      | ESCA | 0.136024779  |
| UCKL1 | Willert_wnt_signaling      | ESCA | -0.115476316 |
| UCKL1 | Wnt_beta_catenin_signali   | ESCA | -0.069752012 |
| UPP1  | Abnormal plasma cell       | ESCA | 0.065920438  |
| UPP1  | Activated b cell           | ESCA | -0.068086216 |
| UPP1  | Activated cd4+ t cell      | ESCA | -0.078088001 |
| UPP1  | Activated t cell           | ESCA | -0.096386848 |
| UPP1  | Alanine, aspartate and glu | ESCA | -0.089070198 |
| UPP1  | Alcala_apoptosis           | ESCA | 0.125725779  |
| UPP1  | Alpha-linolenic acid meta  | ESCA | 0.082473534  |
| UPP1  | Amino sugar and nucleoti   | ESCA | 0.208804414  |
| UPP1  | Ampk_pathway               | ESCA | 0.00235769   |
| UPP1  | Angiogenesis               | ESCA | 0.144538991  |
| UPP1  | Arachidonic acid metabol   | ESCA | 0.144926148  |
| UPP1  | Arginine and proline met   | ESCA | 0.042278615  |
| UPP1  | Arginine biosynthesis      | ESCA | 0.05163248   |
| UPP1  | Ascorbate and aldarate m   | ESCA | -0.19815124  |
| UPP1  | Atypical memory b cell     | ESCA | -0.093139732 |
| UPP1  | Axl+siglec6+ dendritic ce  | ESCA | -0.089288194 |
| UPP1  | B cell                     | ESCA | -0.275478076 |
| UPP1  | B1 cell                    | ESCA | -0.282516851 |
| UPP1  | Basal cell                 | ESCA | 0.524425122  |
| UPP1  | Beta-alanine metabolism    | ESCA | -0.072549714 |
| UPP1  | Biosynthesis of unsaturate | ESCA | 0.079146235  |
| UPP1  | Biotin metabolism          | ESCA | -0.297110209 |
| UPP1  | Butanoate metabolism       | ESCA | -0.221242474 |
| UPP1  | Caffeine metabolism        | ESCA | -0.06137114  |

|      |                             |      |              |
|------|-----------------------------|------|--------------|
| UPP1 | Cancer stem cell            | ESCA | -0.040972974 |
| UPP1 | Cancer stem-like cell       | ESCA | -0.439894575 |
| UPP1 | Cd4+ cytotoxic t cell       | ESCA | 0.09016316   |
| UPP1 | Cd4+ memory t cell          | ESCA | -0.062964088 |
| UPP1 | Cd4+ regulatory t cell      | ESCA | -0.034837394 |
| UPP1 | Cd4+ t helper cell          | ESCA | -0.095872322 |
| UPP1 | Cd4+cd25+ regulatory t c    | ESCA | -0.081609482 |
| UPP1 | Cd8+ cytotoxic t cell       | ESCA | 0.030460529  |
| UPP1 | Cd8+ regulatory t cell      | ESCA | -0.040731406 |
| UPP1 | Cell_cycle                  | ESCA | 0.149476274  |
| UPP1 | Chandran_metastasis_top5    | ESCA | -0.120445248 |
| UPP1 | Citrate cycle (tca cycle)   | ESCA | 0.018823104  |
| UPP1 | Cysteine and methionine r   | ESCA | 0.011844934  |
| UPP1 | Cytokine induced killer c   | ESCA | -0.099690283 |
| UPP1 | D-arginine and d-ornithin   | ESCA | 0.12017812   |
| UPP1 | D-glutamine and d-glutan    | ESCA | 0.161118278  |
| UPP1 | Dendritic cell              | ESCA | 0.038602016  |
| UPP1 | Dna_repair                  | ESCA | 0.139762334  |
| UPP1 | Dna_replication             | ESCA | 0.001030218  |
| UPP1 | Double-negative memory      | ESCA | -0.152287133 |
| UPP1 | Drug metabolism - cytoch    | ESCA | -0.145935087 |
| UPP1 | Drug metabolism - other c   | ESCA | 0.136989555  |
| UPP1 | E2f_targets                 | ESCA | -0.019703024 |
| UPP1 | Ecm_receptor_interaction    | ESCA | 0.130760236  |
| UPP1 | Effector cd4+ memory t (    | ESCA | -0.154817552 |
| UPP1 | Effector cd8+ memory t (    | ESCA | 0.185083142  |
| UPP1 | Effector memory t cell      | ESCA | -0.085483322 |
| UPP1 | Effector regulatory t (treg | ESCA | -0.043601106 |
| UPP1 | Elvidge_hif1a_targets_up    | ESCA | -0.002904958 |
| UPP1 | Endothelial cell            | ESCA | -0.072811138 |
| UPP1 | Eosinophil                  | ESCA | 0.019742435  |
| UPP1 | Ether lipid metabolism      | ESCA | 0.009014656  |
| UPP1 | Exhausted cd4+ t cell       | ESCA | 0.022180199  |
| UPP1 | Exhausted cd8+ t cell       | ESCA | 0.04839946   |
| UPP1 | Exhausted t cell            | ESCA | -0.039243301 |
| UPP1 | Fat cell (adipocyte)        | ESCA | -0.145484714 |
| UPP1 | Fatty acid biosynthesis     | ESCA | -0.257219675 |
| UPP1 | Fatty acid degradation      | ESCA | -0.242642103 |
| UPP1 | Fatty acid elongation       | ESCA | 0.181736002  |
| UPP1 | Fibroblast                  | ESCA | 0.113521888  |
| UPP1 | Folate biosynthesis         | ESCA | -0.044840233 |
| UPP1 | Follicular b cell           | ESCA | -0.046536666 |
| UPP1 | Follicular dendritic cell   | ESCA | -0.091686931 |



|      |                              |      |              |
|------|------------------------------|------|--------------|
| UPP1 | Follicular helper (tfh) t ce | ESCA | 0.114896779  |
| UPP1 | Follicular t cell            | ESCA | 0.006981761  |
| UPP1 | Foxp3+il-17+ t cell          | ESCA | -0.104445301 |
| UPP1 | Fructose and mannose me      | ESCA | 0.121482833  |
| UPP1 | G2m_checkpoint               | ESCA | 0.010738966  |
| UPP1 | Galactose metabolism         | ESCA | 0.199113771  |
| UPP1 | Galie_tumor_stemness_ge      | ESCA | 0.168101544  |
| UPP1 | Glutathione metabolism       | ESCA | 0.088278744  |
| UPP1 | Glycerolipid metabolism      | ESCA | -0.178040554 |
| UPP1 | Glycerophospholipid metæ     | ESCA | -0.008786287 |
| UPP1 | Glycine, serine and threor   | ESCA | 0.073210623  |
| UPP1 | Glycolysis / gluconeogene    | ESCA | 0.198746568  |
| UPP1 | Glycosaminoglycan biosy      | ESCA | 0.237323007  |
| UPP1 | Glycosaminoglycan biosy      | ESCA | 0.144351205  |
| UPP1 | Glycosaminoglycan biosy      | ESCA | 0.015490024  |
| UPP1 | Glycosaminoglycan degra      | ESCA | -0.215125399 |
| UPP1 | Glycosphingolipid biosyn     | ESCA | 0.02310156   |
| UPP1 | Glycosphingolipid biosyn     | ESCA | -0.157139566 |
| UPP1 | Glycosphingolipid biosyn     | ESCA | -0.108137482 |
| UPP1 | Glycosylphosphatidylinos     | ESCA | -0.064300727 |
| UPP1 | Glyoxylate and dicarboxy     | ESCA | -0.166937519 |
| UPP1 | Granulocyte                  | ESCA | -0.033062945 |
| UPP1 | Hedgehog_signaling           | ESCA | 0.160870803  |
| UPP1 | Histidine metabolism         | ESCA | -0.179224118 |
| UPP1 | Hypoxia                      | ESCA | 0.581853344  |
| UPP1 | Il-17ralpha t cell           | ESCA | -0.00048997  |
| UPP1 | Il2_stat5_signaling          | ESCA | 0.227538734  |
| UPP1 | Il6_jak_stat3_signaling      | ESCA | 0.177982526  |
| UPP1 | Immune_checkpoints_tur       | ESCA | -0.036558572 |
| UPP1 | Immune_inhibition_cytok      | ESCA | 0.23670507   |
| UPP1 | Inositol phosphate metabo    | ESCA | -0.120710978 |
| UPP1 | Interleukin_6_signaling      | ESCA | 0.069483022  |
| UPP1 | Jaeger_metastasis_up         | ESCA | -0.10174339  |
| UPP1 | Jain_nfkb_signaling          | ESCA | 0.224203548  |
| UPP1 | Kras_signaling_up            | ESCA | 0.156444704  |
| UPP1 | Linoleic acid metabolism     | ESCA | -0.001996358 |
| UPP1 | Lipoic acid metabolism       | ESCA | -0.334132262 |
| UPP1 | Lysine degradation           | ESCA | -0.217315054 |
| UPP1 | Lysosome                     | ESCA | -0.029265206 |
| UPP1 | M1 macrophage                | ESCA | 0.135697103  |
| UPP1 | M2 macrophage                | ESCA | 0.222595147  |
| UPP1 | Mannose type o-glycan bi     | ESCA | -0.112489775 |
| UPP1 | Mapk_signaling_pathway       | ESCA | 0.317784272  |

|      |                                                   |      |              |
|------|---------------------------------------------------|------|--------------|
| UPP1 | Mapk3_erk1_activation                             | ESCA | 0.111810873  |
| UPP1 | Marginal zone b cell                              | ESCA | -0.107817178 |
| UPP1 | Memory b cell                                     | ESCA | -0.065127696 |
| UPP1 | Mesenchymal cell                                  | ESCA | 0.15183335   |
| UPP1 | Mesenchymal stem cell                             | ESCA | -0.097269455 |
| UPP1 | Metabolism of xenobiotics                         | ESCA | -0.078815803 |
| UPP1 | Migrating cancer stem cell                        | ESCA | 0.290399127  |
| UPP1 | Mitotic_spindle                                   | ESCA | 0.109309845  |
| UPP1 | Monocyte                                          | ESCA | 0.212886977  |
| UPP1 | Mtor_signaling_pathway                            | ESCA | 0.32575655   |
| UPP1 | Mtorc1_signaling                                  | ESCA | 0.360400878  |
| UPP1 | Mucin type o-glycan biosynthesis                  | ESCA | -0.131009382 |
| UPP1 | Myc_targets_v1                                    | ESCA | 0.192598533  |
| UPP1 | Myeloid cell                                      | ESCA | -0.013476212 |
| UPP1 | N-glycan biosynthesis                             | ESCA | -0.288855719 |
| UPP1 | Naive b cell                                      | ESCA | -0.04718292  |
| UPP1 | Naive cd4+ t cell                                 | ESCA | -0.08232209  |
| UPP1 | Naive cd8+ t cell                                 | ESCA | -0.190610938 |
| UPP1 | Natural killer cell                               | ESCA | -0.026579169 |
| UPP1 | Natural killer t (nkt) cell                       | ESCA | -0.061318    |
| UPP1 | Natural regulatory t (treg) cell                  | ESCA | -0.000675726 |
| UPP1 | Neomycin, kanamycin and streptomycin              | ESCA | 0.448565068  |
| UPP1 | Neutrophil                                        | ESCA | 0.279393906  |
| UPP1 | Nicotinate and nicotinamide metabolism            | ESCA | -0.082413312 |
| UPP1 | Nitrogen metabolism                               | ESCA | -0.210251532 |
| UPP1 | Nod_like_receptor_signaling                       | ESCA | 0.370738395  |
| UPP1 | Notch_signaling                                   | ESCA | 0.273315242  |
| UPP1 | One carbon pool by folate                         | ESCA | -0.115713346 |
| UPP1 | Other glycan degradation                          | ESCA | -0.312261024 |
| UPP1 | Other types of o-glycan biosynthesis              | ESCA | -0.259528934 |
| UPP1 | Oxidative phosphorylation                         | ESCA | 0.163217456  |
| UPP1 | P53_pathway                                       | ESCA | 0.621153891  |
| UPP1 | P53_signaling_pathway                             | ESCA | 0.321546012  |
| UPP1 | Pantothenate and coenzyme a biosynthesis          | ESCA | -0.093789576 |
| UPP1 | Pentose and glucuronate interconversions          | ESCA | -0.123868018 |
| UPP1 | Pentose phosphate pathway                         | ESCA | 0.175111938  |
| UPP1 | Pericyte                                          | ESCA | -0.075396738 |
| UPP1 | Phenylalanine metabolism                          | ESCA | 0.100845199  |
| UPP1 | Phenylalanine, tyrosine and tryptophan metabolism | ESCA | -0.046129263 |
| UPP1 | Phosphonate and phosphite metabolism              | ESCA | -0.068566318 |
| UPP1 | Pi3k_akt_activation                               | ESCA | 0.103167994  |
| UPP1 | Pi3k_akt_mtor_signaling                           | ESCA | 0.512013423  |
| UPP1 | Porphyryin and chlorophyll biosynthesis           | ESCA | -0.05673118  |

|      |                            |      |              |
|------|----------------------------|------|--------------|
| UPP1 | Primary bile acid biosynt  | ESCA | -0.203032406 |
| UPP1 | Propanoate metabolism      | ESCA | -0.270873899 |
| UPP1 | Purine metabolism          | ESCA | 0.02570701   |
| UPP1 | Pyrimidine metabolism      | ESCA | 0.16436883   |
| UPP1 | Pyruvate metabolism        | ESCA | -0.121048947 |
| UPP1 | Regulation_of_autophagy    | ESCA | 0.013596475  |
| UPP1 | Retinol metabolism         | ESCA | 0.04226102   |
| UPP1 | Riboflavin metabolism      | ESCA | -0.192394388 |
| UPP1 | Schmahl_pdgf_signaling     | ESCA | 0.210304001  |
| UPP1 | Selenocompound metabol     | ESCA | -0.462630312 |
| UPP1 | Signaling_by_hippo         | ESCA | 0.1191346    |
| UPP1 | Sphingolipid metabolism    | ESCA | -0.123484169 |
| UPP1 | Starch and sucrose metabo  | ESCA | 0.243191732  |
| UPP1 | Steroid biosynthesis       | ESCA | 0.154725079  |
| UPP1 | Steroid hormone biosynth   | ESCA | -0.026836009 |
| UPP1 | Sulfur metabolism          | ESCA | -0.139659519 |
| UPP1 | Synthesis and degradation  | ESCA | -0.059648033 |
| UPP1 | T helper cell              | ESCA | -0.129225303 |
| UPP1 | T helper1 (th1) cell       | ESCA | 0.04437681   |
| UPP1 | T helper17 (th17) cell     | ESCA | 0.1892035    |
| UPP1 | T helper2 (th2) cell       | ESCA | -0.069552935 |
| UPP1 | T helper9 (th9) cell       | ESCA | -0.075013148 |
| UPP1 | Taurine and hypotaurine r  | ESCA | -0.288133409 |
| UPP1 | Terpenoid backbone biosy   | ESCA | 0.134694962  |
| UPP1 | Tgf_beta_signaling_pathw   | ESCA | 0.143709021  |
| UPP1 | Thiamine metabolism        | ESCA | -0.202537545 |
| UPP1 | Tnfa_signaling_via_nfkb    | ESCA | 0.405767779  |
| UPP1 | Tryptophan metabolism      | ESCA | -0.243136789 |
| UPP1 | Tumor endothelial cell     | ESCA | 0.515180519  |
| UPP1 | Tyrosine metabolism        | ESCA | 0.048719216  |
| UPP1 | Ubiquinone and other ter   | ESCA | -0.021821061 |
| UPP1 | Valine, leucine and isoleu | ESCA | 0.051294023  |
| UPP1 | Valine, leucine and isoleu | ESCA | -0.243315921 |
| UPP1 | Vascular endothelial cell  | ESCA | -0.176602016 |
| UPP1 | Vascular smooth muscle c   | ESCA | -0.070771584 |
| UPP1 | Vegf_signaling_pathway     | ESCA | 0.363965885  |
| UPP1 | Vitamin b6 metabolism      | ESCA | -0.12458481  |
| UPP1 | Willert_wnt_signaling      | ESCA | 0.177660531  |
| UPP1 | Wnt_beta_catenin_signali   | ESCA | 0.156873842  |
| UPP2 | Abnormal plasma cell       | ESCA | -0.045549525 |
| UPP2 | Activated b cell           | ESCA | 0.049280655  |
| UPP2 | Activated cd4+ t cell      | ESCA | 0.077679252  |
| UPP2 | Activated t cell           | ESCA | 0.078824568  |

|      |                            |      |              |
|------|----------------------------|------|--------------|
| UPP2 | Alanine, aspartate and glu | ESCA | -0.145012226 |
| UPP2 | Alcala_apoptosis           | ESCA | -0.217983814 |
| UPP2 | Alpha-linolenic acid meta  | ESCA | -0.011722244 |
| UPP2 | Amino sugar and nucleoti   | ESCA | -0.267748583 |
| UPP2 | Ampk_pathway               | ESCA | -0.126464262 |
| UPP2 | Angiogenesis               | ESCA | -0.056110065 |
| UPP2 | Arachidonic acid metabol   | ESCA | -0.013759219 |
| UPP2 | Arginine and proline metæ  | ESCA | -0.208528522 |
| UPP2 | Arginine biosynthesis      | ESCA | -0.154433167 |
| UPP2 | Ascorbate and aldarate mε  | ESCA | -0.02927952  |
| UPP2 | Atypical memory b cell     | ESCA | 0.103278343  |
| UPP2 | Axl+siglec6+ dendritic ce  | ESCA | 0.106703056  |
| UPP2 | B cell                     | ESCA | 0.136427655  |
| UPP2 | B1 cell                    | ESCA | 0.11089298   |
| UPP2 | Basal cell                 | ESCA | -0.117474297 |
| UPP2 | Beta-alanine metabolism    | ESCA | -0.041330538 |
| UPP2 | Biosynthesis of unsaturate | ESCA | -0.222171264 |
| UPP2 | Biotin metabolism          | ESCA | -0.035966598 |
| UPP2 | Butanoate metabolism       | ESCA | -0.029652714 |
| UPP2 | Caffeine metabolism        | ESCA | 0.100033981  |
| UPP2 | Cancer stem cell           | ESCA | 0.099091288  |
| UPP2 | Cancer stem-like cell      | ESCA | 0.135082217  |
| UPP2 | Cd4+ cytotoxic t cell      | ESCA | -0.00407943  |
| UPP2 | Cd4+ memory t cell         | ESCA | 0.031264036  |
| UPP2 | Cd4+ regulatory t cell     | ESCA | 0.058970247  |
| UPP2 | Cd4+ t helper cell         | ESCA | 0.09599773   |
| UPP2 | Cd4+cd25+ regulatory t c   | ESCA | 0.09281549   |
| UPP2 | Cd8+ cytotoxic t cell      | ESCA | 0.009736094  |
| UPP2 | Cd8+ regulatory t cell     | ESCA | 0.010503325  |
| UPP2 | Cell_cycle                 | ESCA | -0.295573913 |
| UPP2 | Chandran_metastasis_topç   | ESCA | -0.105073037 |
| UPP2 | Citrate cycle (tca cycle)  | ESCA | -0.149186954 |
| UPP2 | Cysteine and methionine r  | ESCA | -0.181537039 |
| UPP2 | Cytokine induced killer cε | ESCA | 0.078185652  |
| UPP2 | D-arginine and d-ornithin  | ESCA | 0.169729654  |
| UPP2 | D-glutamine and d-glutan   | ESCA | -0.038546106 |
| UPP2 | Dendritic cell             | ESCA | 0.033291768  |
| UPP2 | Dna_repair                 | ESCA | -0.188338354 |
| UPP2 | Dna_replication            | ESCA | -0.175533867 |
| UPP2 | Double-negative memory     | ESCA | 0.074788776  |
| UPP2 | Drug metabolism - cytoch   | ESCA | 0.002740401  |
| UPP2 | Drug metabolism - other ç  | ESCA | -0.172350886 |
| UPP2 | E2f_targets                | ESCA | -0.211088413 |

|      |                                     |              |
|------|-------------------------------------|--------------|
| UPP2 | Ecm_receptor_interaction ESCA       | -0.096380527 |
| UPP2 | Effector cd4+ memory t ( ESCA       | 0.115993227  |
| UPP2 | Effector cd8+ memory t ( ESCA       | -0.053103847 |
| UPP2 | Effector memory t cell ESCA         | 0.066698121  |
| UPP2 | Effector regulatory t (treg ESCA    | 0.059887132  |
| UPP2 | Elvidge_hif1a_targets_up ESCA       | -0.207348929 |
| UPP2 | Endothelial cell ESCA               | 0.028109884  |
| UPP2 | Eosinophil ESCA                     | 0.034385083  |
| UPP2 | Ether lipid metabolism ESCA         | 0.045492097  |
| UPP2 | Exhausted cd4+ t cell ESCA          | 0.095932696  |
| UPP2 | Exhausted cd8+ t cell ESCA          | 0.093729601  |
| UPP2 | Exhausted t cell ESCA               | 0.056425344  |
| UPP2 | Fat cell (adipocyte) ESCA           | -0.041530862 |
| UPP2 | Fatty acid biosynthesis ESCA        | -0.02707634  |
| UPP2 | Fatty acid degradation ESCA         | -0.009610376 |
| UPP2 | Fatty acid elongation ESCA          | -0.24173612  |
| UPP2 | Fibroblast ESCA                     | 0.004453906  |
| UPP2 | Folate biosynthesis ESCA            | -0.125375898 |
| UPP2 | Follicular b cell ESCA              | 0.088667648  |
| UPP2 | Follicular dendritic cell ESCA      | 0.043381313  |
| UPP2 | Follicular helper (tfh) t cell ESCA | 0.043548743  |
| UPP2 | Follicular t cell ESCA              | -0.053629997 |
| UPP2 | Foxp3+il-17+ t cell ESCA            | 0.020561754  |
| UPP2 | Fructose and mannose me ESCA        | -0.191650707 |
| UPP2 | G2m_checkpoint ESCA                 | -0.241075383 |
| UPP2 | Galactose metabolism ESCA           | -0.244452881 |
| UPP2 | Galie_tumor_stemness_ge ESCA        | -0.032979914 |
| UPP2 | Glutathione metabolism ESCA         | -0.248995651 |
| UPP2 | Glycerolipid metabolism ESCA        | -0.040623433 |
| UPP2 | Glycerophospholipid met ESCA        | -0.067882568 |
| UPP2 | Glycine, serine and threor ESCA     | -0.172291524 |
| UPP2 | Glycolysis / gluconeogene ESCA      | -0.205872181 |
| UPP2 | Glycosaminoglycan biosy ESCA        | -0.076669533 |
| UPP2 | Glycosaminoglycan biosy ESCA        | -0.03378496  |
| UPP2 | Glycosaminoglycan biosy ESCA        | -0.09111894  |
| UPP2 | Glycosaminoglycan degra ESCA        | -0.132121917 |
| UPP2 | Glycosphingolipid biosyn ESCA       | -0.117953939 |
| UPP2 | Glycosphingolipid biosyn ESCA       | -0.058491969 |
| UPP2 | Glycosphingolipid biosyn ESCA       | 0.030515216  |
| UPP2 | Glycosylphosphatidylinos ESCA       | -0.130175692 |
| UPP2 | Glyoxylate and dicarboxy ESCA       | -0.189858348 |
| UPP2 | Granulocyte ESCA                    | 0.002210544  |
| UPP2 | Hedgehog_signaling ESCA             | -0.018411618 |

|      |                             |      |              |
|------|-----------------------------|------|--------------|
| UPP2 | Histidine metabolism        | ESCA | 0.049239349  |
| UPP2 | Hypoxia                     | ESCA | -0.167436115 |
| UPP2 | Il-17alpha t cell           | ESCA | 0.038699731  |
| UPP2 | Il2_stat5_signaling         | ESCA | -0.059848116 |
| UPP2 | Il6_jak_stat3_signaling     | ESCA | -0.074102846 |
| UPP2 | Immune_checkpoints_tur      | ESCA | -0.06175865  |
| UPP2 | Immune_inhibition_cytok     | ESCA | -0.02528731  |
| UPP2 | Inositol phosphate metabo   | ESCA | -0.080935411 |
| UPP2 | Interleukin_6_signaling     | ESCA | -0.038309884 |
| UPP2 | Jaeger_metastasis_up        | ESCA | -0.150530789 |
| UPP2 | Jain_nfkb_signaling         | ESCA | -0.232218769 |
| UPP2 | Kras_signaling_up           | ESCA | 0.009984194  |
| UPP2 | Linoleic acid metabolism    | ESCA | 0.051667636  |
| UPP2 | Lipoic acid metabolism      | ESCA | 0.131105444  |
| UPP2 | Lysine degradation          | ESCA | -0.147406431 |
| UPP2 | Lysosome                    | ESCA | -0.167277908 |
| UPP2 | M1 macrophage               | ESCA | -0.010684794 |
| UPP2 | M2 macrophage               | ESCA | -0.062663827 |
| UPP2 | Mannose type o-glycan bi    | ESCA | -0.06965442  |
| UPP2 | Mapk_signaling_pathway      | ESCA | -0.09753991  |
| UPP2 | Mapk3_erk1_activation       | ESCA | -0.115970419 |
| UPP2 | Marginal zone b cell        | ESCA | 0.076083801  |
| UPP2 | Memory b cell               | ESCA | 0.017692791  |
| UPP2 | Mesenchymal cell            | ESCA | -0.019891331 |
| UPP2 | Mesenchymal stem cell       | ESCA | 0.097225372  |
| UPP2 | Metabolism of xenobiotic    | ESCA | -0.045685301 |
| UPP2 | Migrating cancer stem cel   | ESCA | -0.186246554 |
| UPP2 | Mitotic_spindle             | ESCA | -0.214415045 |
| UPP2 | Monocyte                    | ESCA | 0.045166136  |
| UPP2 | Mtor_signaling_pathway      | ESCA | -0.211565513 |
| UPP2 | Mtorc1_signaling            | ESCA | -0.318365403 |
| UPP2 | Mucin type o-glycan biosy   | ESCA | 0.067311368  |
| UPP2 | Myc_targets_v1              | ESCA | -0.20508714  |
| UPP2 | Myeloid cell                | ESCA | 0.034964023  |
| UPP2 | N-glycan biosynthesis       | ESCA | -0.116513078 |
| UPP2 | Naive b cell                | ESCA | 0.044346431  |
| UPP2 | Naive cd4+ t cell           | ESCA | 0.069949225  |
| UPP2 | Naive cd8+ t cell           | ESCA | 0.105673349  |
| UPP2 | Natural killer cell         | ESCA | 0.048596659  |
| UPP2 | Natural killer t (nkt) cell | ESCA | 0.027775452  |
| UPP2 | Natural regulatory t (treg) | ESCA | 0.074738148  |
| UPP2 | Neomycin, kanamycin an      | ESCA | -0.144605232 |
| UPP2 | Neutrophil                  | ESCA | 0.041355483  |

|      |                                 |              |
|------|---------------------------------|--------------|
| UPP2 | Nicotinate and nicotinami ESCA  | 0.048333238  |
| UPP2 | Nitrogen metabolism ESCA        | 0.119331109  |
| UPP2 | Nod_like_receptor_signal ESCA   | -0.093952816 |
| UPP2 | Notch_signaling ESCA            | -0.069350967 |
| UPP2 | One carbon pool by folate ESCA  | -0.272025192 |
| UPP2 | Other glycan degradation ESCA   | -0.005283938 |
| UPP2 | Other types of o-glycan b ESCA  | -0.032351895 |
| UPP2 | Oxidative phosphorylatior ESCA  | -0.161558755 |
| UPP2 | P53_pathway ESCA                | -0.242659387 |
| UPP2 | P53_signaling_pathway ESCA      | -0.258832904 |
| UPP2 | Pantothenate and coa bios ESCA  | 0.144456435  |
| UPP2 | Pentose and glucuronate i ESCA  | -0.129406709 |
| UPP2 | Pentose phosphate pathwa ESCA   | -0.234655611 |
| UPP2 | Pericyte ESCA                   | 0.068079549  |
| UPP2 | Phenylalanine metabolism ESCA   | -0.067652293 |
| UPP2 | Phenylalanine, tyrosine ar ESCA | -0.006153441 |
| UPP2 | Phosphonate and phosphir ESCA   | -0.03000888  |
| UPP2 | Pi3k_akt_activation ESCA        | -0.154352555 |
| UPP2 | Pi3k_akt_mtor_signaling ESCA    | -0.335562219 |
| UPP2 | Porphyrin and chlorophyl ESCA   | -0.191778384 |
| UPP2 | Primary bile acid biosyntf ESCA | 0.179879351  |
| UPP2 | Propanoate metabolism ESCA      | -0.005121885 |
| UPP2 | Purine metabolism ESCA          | -0.206315891 |
| UPP2 | Pyrimidine metabolism ESCA      | -0.192271587 |
| UPP2 | Pyruvate metabolism ESCA        | -0.165100698 |
| UPP2 | Regulation_of_autophagy ESCA    | 0.082085126  |
| UPP2 | Retinol metabolism ESCA         | 0.004298119  |
| UPP2 | Riboflavin metabolism ESCA      | 0.063575537  |
| UPP2 | Schmahl_pdgf_signaling ESCA     | 0.061522707  |
| UPP2 | Selenocompound metabol ESCA     | 0.044133773  |
| UPP2 | Signaling_by_hippo ESCA         | -0.165298588 |
| UPP2 | Sphingolipid metabolism ESCA    | -0.011173313 |
| UPP2 | Starch and sucrose metabc ESCA  | -0.172552757 |
| UPP2 | Steroid biosynthesis ESCA       | -0.256624834 |
| UPP2 | Steroid hormone biosynth ESCA   | 0.054626415  |
| UPP2 | Sulfur metabolism ESCA          | -0.029749693 |
| UPP2 | Synthesis and degradation ESCA  | 0.004462622  |
| UPP2 | T helper cell ESCA              | 0.108616534  |
| UPP2 | T helper1 (th1) cell ESCA       | 0.03989652   |
| UPP2 | T helper17 (th17) cell ESCA     | 0.071341244  |
| UPP2 | T helper2 (th2) cell ESCA       | 0.090894494  |
| UPP2 | T helper9 (th9) cell ESCA       | 0.08855084   |
| UPP2 | Taurine and hypotaurine r ESCA  | 0.094620018  |

|      |                            |      |              |
|------|----------------------------|------|--------------|
| UPP2 | Terpenoid backbone biosy   | ESCA | -0.171392954 |
| UPP2 | Tgf_beta_signaling_pathw   | ESCA | -0.077928487 |
| UPP2 | Thiamine metabolism        | ESCA | 0.052816331  |
| UPP2 | Tnfa_signaling_via_nfk     | ESCA | -0.054676102 |
| UPP2 | Tryptophan metabolism      | ESCA | -0.004016442 |
| UPP2 | Tumor endothelial cell     | ESCA | -0.125390836 |
| UPP2 | Tyrosine metabolism        | ESCA | -0.065454448 |
| UPP2 | Ubiquinone and other ter   | ESCA | -0.197939102 |
| UPP2 | Valine, leucine and isoleu | ESCA | 0.017728009  |
| UPP2 | Valine, leucine and isoleu | ESCA | -0.050525327 |
| UPP2 | Vascular endothelial cell  | ESCA | 0.021780723  |
| UPP2 | Vascular smooth muscle c   | ESCA | 0.027027621  |
| UPP2 | Vegf_signaling_pathway     | ESCA | -0.194087905 |
| UPP2 | Vitamin b6 metabolism      | ESCA | -0.062809921 |
| UPP2 | Willert_wnt_signaling      | ESCA | -0.104458229 |
| UPP2 | Wnt_beta_catenin_signali   | ESCA | -0.091549309 |
| CDA  | Abnormal plasma cell       | GBM  | 0.061127237  |
| CDA  | Activated b cell           | GBM  | 0.282462405  |
| CDA  | Activated cd4+ t cell      | GBM  | 0.239383566  |
| CDA  | Activated t cell           | GBM  | 0.292163793  |
| CDA  | Alanine, aspartate and glu | GBM  | -0.011912425 |
| CDA  | Alcala_apoptosis           | GBM  | 0.245532067  |
| CDA  | Alpha-linolenic acid meta  | GBM  | 0.036422532  |
| CDA  | Amino sugar and nucleoti   | GBM  | 0.208275127  |
| CDA  | Ampk_pathway               | GBM  | -0.226605169 |
| CDA  | Angiogenesis               | GBM  | 0.28778812   |
| CDA  | Arachidonic acid metabol   | GBM  | 0.346825418  |
| CDA  | Arginine and proline met   | GBM  | 0.317757972  |
| CDA  | Arginine biosynthesis      | GBM  | 0.296925571  |
| CDA  | Ascorbate and aldarate m   | GBM  | -0.118734045 |
| CDA  | Atypical memory b cell     | GBM  | 0.304153188  |
| CDA  | Axl+siglec6+ dendritic ce  | GBM  | 0.299138408  |
| CDA  | B cell                     | GBM  | 0.336774862  |
| CDA  | B1 cell                    | GBM  | 0.137775717  |
| CDA  | Basal cell                 | GBM  | 0.309083646  |
| CDA  | Beta-alanine metabolism    | GBM  | 0.185882709  |
| CDA  | Biosynthesis of unsaturate | GBM  | 0.057786753  |
| CDA  | Biotin metabolism          | GBM  | 0.057820779  |
| CDA  | Butanoate metabolism       | GBM  | 0.039158594  |
| CDA  | Caffeine metabolism        | GBM  | 0.101152535  |
| CDA  | Cancer stem cell           | GBM  | 0.204384145  |
| CDA  | Cancer stem-like cell      | GBM  | 0.386991226  |
| CDA  | Cd4+ cytotoxic t cell      | GBM  | 0.295094845  |



|     |                              |     |              |
|-----|------------------------------|-----|--------------|
| CDA | Cd4+ memory t cell           | GBM | 0.247206061  |
| CDA | Cd4+ regulatory t cell       | GBM | 0.280595525  |
| CDA | Cd4+ t helper cell           | GBM | 0.264009818  |
| CDA | Cd4+cd25+ regulatory t c     | GBM | 0.284371438  |
| CDA | Cd8+ cytotoxic t cell        | GBM | 0.335949444  |
| CDA | Cd8+ regulatory t cell       | GBM | 0.345342841  |
| CDA | Cell_cycle                   | GBM | -0.244806845 |
| CDA | Chandran_metastasis_top5     | GBM | -0.374250051 |
| CDA | Citrate cycle (tca cycle)    | GBM | 0.167012602  |
| CDA | Cysteine and methionine r    | GBM | 0.0983678    |
| CDA | Cytokine induced killer cε   | GBM | 0.219647784  |
| CDA | D-arginine and d-ornithin    | GBM | 0.012326759  |
| CDA | D-glutamine and d-glutan     | GBM | -0.053946696 |
| CDA | Dendritic cell               | GBM | 0.294913444  |
| CDA | Dna_repair                   | GBM | 0.104954006  |
| CDA | Dna_replication              | GBM | -0.152714024 |
| CDA | Double-negative memory       | GBM | 0.231482336  |
| CDA | Drug metabolism - cytoch     | GBM | 0.230280804  |
| CDA | Drug metabolism - other ε    | GBM | 0.235332828  |
| CDA | E2f_targets                  | GBM | -0.215069887 |
| CDA | Ecm_receptor_interaction     | GBM | 0.206418135  |
| CDA | Effector cd4+ memory t (     | GBM | 0.199297535  |
| CDA | Effector cd8+ memory t (     | GBM | 0.243873927  |
| CDA | Effector memory t cell       | GBM | 0.25962076   |
| CDA | Effector regulatory t (treg  | GBM | 0.28627537   |
| CDA | Elvidge_hif1a_targets_up     | GBM | 0.119957521  |
| CDA | Endothelial cell             | GBM | 0.435720235  |
| CDA | Eosinophil                   | GBM | 0.292851402  |
| CDA | Ether lipid metabolism       | GBM | 0.103742713  |
| CDA | Exhausted cd4+ t cell        | GBM | 0.18642343   |
| CDA | Exhausted cd8+ t cell        | GBM | 0.230042472  |
| CDA | Exhausted t cell             | GBM | 0.285237814  |
| CDA | Fat cell (adipocyte)         | GBM | 0.340596307  |
| CDA | Fatty acid biosynthesis      | GBM | 0.023535285  |
| CDA | Fatty acid degradation       | GBM | 0.159744372  |
| CDA | Fatty acid elongation        | GBM | 0.284758212  |
| CDA | Fibroblast                   | GBM | 0.361674676  |
| CDA | Folate biosynthesis          | GBM | 0.194502358  |
| CDA | Follicular b cell            | GBM | 0.250562664  |
| CDA | Follicular dendritic cell    | GBM | 0.269237322  |
| CDA | Follicular helper (tfh) t ce | GBM | 0.266940739  |
| CDA | Follicular t cell            | GBM | 0.214917209  |
| CDA | Foxp3+il-17+ t cell          | GBM | 0.009674755  |

|     |                            |     |              |
|-----|----------------------------|-----|--------------|
| CDA | Fructose and mannose me    | GBM | 0.103902924  |
| CDA | G2m_checkpoint             | GBM | -0.296516376 |
| CDA | Galactose metabolism       | GBM | 0.196949904  |
| CDA | Galie_tumor_stemness_ge    | GBM | 0.022398286  |
| CDA | Glutathione metabolism     | GBM | 0.298413972  |
| CDA | Glycerolipid metabolism    | GBM | 0.047650812  |
| CDA | Glycerophospholipid metæ   | GBM | 0.167566532  |
| CDA | Glycine, serine and threor | GBM | 0.123928703  |
| CDA | Glycolysis / gluconeogene  | GBM | 0.148680393  |
| CDA | Glycosaminoglycan biosy1   | GBM | 0.142989267  |
| CDA | Glycosaminoglycan biosy1   | GBM | 0.0952365    |
| CDA | Glycosaminoglycan biosy1   | GBM | 0.236103496  |
| CDA | Glycosaminoglycan degra    | GBM | 0.254170572  |
| CDA | Glycosphingolipid biosyn1  | GBM | 0.365284514  |
| CDA | Glycosphingolipid biosyn1  | GBM | 0.398653179  |
| CDA | Glycosphingolipid biosyn1  | GBM | 0.103010961  |
| CDA | Glycosylphosphatidylinos   | GBM | 0.125200315  |
| CDA | Glyoxylate and dicarboxy   | GBM | 0.185317962  |
| CDA | Granulocyte                | GBM | 0.27281068   |
| CDA | Hedgehog_signaling         | GBM | -0.163168927 |
| CDA | Histidine metabolism       | GBM | 0.195637848  |
| CDA | Hypoxia                    | GBM | 0.162496002  |
| CDA | Il-17ralpha t cell         | GBM | 0.297343434  |
| CDA | Il2_stat5_signaling        | GBM | 0.311780043  |
| CDA | Il6_jak_stat3_signaling    | GBM | 0.247934187  |
| CDA | Immune_checkpoints_tunr    | GBM | 0.131254594  |
| CDA | Immune_inhibition_cytok    | GBM | 0.342305913  |
| CDA | Inositol phosphate metabo  | GBM | -0.090668202 |
| CDA | Interleukin_6_signaling    | GBM | -0.150993168 |
| CDA | Jaeger_metastasis_up       | GBM | 0.097841937  |
| CDA | Jain_nfkb_signaling        | GBM | -0.181436161 |
| CDA | Kras_signaling_up          | GBM | 0.306808919  |
| CDA | Linoleic acid metabolism   | GBM | 0.005353871  |
| CDA | Lipoic acid metabolism     | GBM | 0.065486068  |
| CDA | Lysine degradation         | GBM | -0.381470108 |
| CDA | Lysosome                   | GBM | 0.292170377  |
| CDA | M1 macrophage              | GBM | 0.301691423  |
| CDA | M2 macrophage              | GBM | 0.367821971  |
| CDA | Mannose type o-glycan bi   | GBM | -0.191210402 |
| CDA | Mapk_signaling_pathway     | GBM | 0.158174855  |
| CDA | Mapk3_erk1_activation      | GBM | -0.026945901 |
| CDA | Marginal zone b cell       | GBM | 0.285455811  |
| CDA | Memory b cell              | GBM | 0.189670567  |

|     |                             |     |              |
|-----|-----------------------------|-----|--------------|
| CDA | Mesenchymal cell            | GBM | 0.393345044  |
| CDA | Mesenchymal stem cell       | GBM | 0.28395438   |
| CDA | Metabolism of xenobiotic    | GBM | 0.276926214  |
| CDA | Migrating cancer stem cel   | GBM | 0.094302638  |
| CDA | Mitotic_spindle             | GBM | -0.347487105 |
| CDA | Monocyte                    | GBM | 0.346407557  |
| CDA | Mtor_signaling_pathway      | GBM | -0.098811879 |
| CDA | Mtorc1_signaling            | GBM | 0.128007543  |
| CDA | Mucin type o-glycan biosy   | GBM | 0.093897316  |
| CDA | Myc_targets_v1              | GBM | 0.038618798  |
| CDA | Myeloid cell                | GBM | 0.291287212  |
| CDA | N-glycan biosynthesis       | GBM | 0.184097222  |
| CDA | Naive b cell                | GBM | 0.004249011  |
| CDA | Naive cd4+ t cell           | GBM | 0.444888512  |
| CDA | Naive cd8+ t cell           | GBM | 0.31803091   |
| CDA | Natural killer cell         | GBM | 0.323665647  |
| CDA | Natural killer t (nkt) cell | GBM | 0.221857631  |
| CDA | Natural regulatory t (treg) | GBM | 0.246634192  |
| CDA | Neomycin, kanamycin and     | GBM | 0.018987955  |
| CDA | Neutrophil                  | GBM | 0.365509368  |
| CDA | Nicotinate and nicotinami   | GBM | 0.179653823  |
| CDA | Nitrogen metabolism         | GBM | 0.068908115  |
| CDA | Nod_like_receptor_signal    | GBM | 0.197080567  |
| CDA | Notch_signaling             | GBM | -0.039616126 |
| CDA | One carbon pool by folate   | GBM | -0.001015118 |
| CDA | Other glycan degradation    | GBM | 0.187058581  |
| CDA | Other types of o-glycan b   | GBM | -0.12504619  |
| CDA | Oxidative phosphorylatio    | GBM | 0.310080709  |
| CDA | P53_pathway                 | GBM | 0.345965266  |
| CDA | P53_signaling_pathway       | GBM | 0.102034784  |
| CDA | Pantothenate and coa bios   | GBM | 0.180367049  |
| CDA | Pentose and glucuronate i   | GBM | 0.137815335  |
| CDA | Pentose phosphate pathwa    | GBM | 0.184086287  |
| CDA | Pericyte                    | GBM | 0.399397628  |
| CDA | Phenylalanine metabolism    | GBM | 0.226824659  |
| CDA | Phenylalanine, tyrosine ar  | GBM | 0.099286138  |
| CDA | Phosphonate and phosphir    | GBM | 0.014157082  |
| CDA | Pi3k_akt_activation         | GBM | 0.091817646  |
| CDA | Pi3k_akt_mtor_signaling     | GBM | 0.158568504  |
| CDA | Porphyrin and chlorophyl    | GBM | 0.158711438  |
| CDA | Primary bile acid biosynt   | GBM | 0.263208249  |
| CDA | Propanoate metabolism       | GBM | 0.026860116  |
| CDA | Purine metabolism           | GBM | 0.2591893    |

|      |                            |     |              |
|------|----------------------------|-----|--------------|
| CDA  | Pyrimidine metabolism      | GBM | 0.101300112  |
| CDA  | Pyruvate metabolism        | GBM | 0.119020793  |
| CDA  | Regulation_of_autophagy    | GBM | 0.145776777  |
| CDA  | Retinol metabolism         | GBM | 0.227061771  |
| CDA  | Riboflavin metabolism      | GBM | 0.255904302  |
| CDA  | Schmahl_pdgf_signaling     | GBM | 0.053538607  |
| CDA  | Selenocompound metabol     | GBM | 0.126118568  |
| CDA  | Signaling_by_hippo         | GBM | -0.179331152 |
| CDA  | Sphingolipid metabolism    | GBM | 0.241056754  |
| CDA  | Starch and sucrose metabo  | GBM | 0.032418285  |
| CDA  | Steroid biosynthesis       | GBM | 0.046450912  |
| CDA  | Steroid hormone biosynth   | GBM | 0.24501781   |
| CDA  | Sulfur metabolism          | GBM | 0.316095624  |
| CDA  | Synthesis and degradation  | GBM | 0.000367706  |
| CDA  | T helper cell              | GBM | 0.368417005  |
| CDA  | T helper1 (th1) cell       | GBM | 0.326704025  |
| CDA  | T helper17 (th17) cell     | GBM | 0.295829789  |
| CDA  | T helper2 (th2) cell       | GBM | 0.339002476  |
| CDA  | T helper9 (th9) cell       | GBM | 0.382795212  |
| CDA  | Taurine and hypotaurine r  | GBM | 0.065174919  |
| CDA  | Terpenoid backbone biosy   | GBM | 0.099105227  |
| CDA  | Tgf_beta_signaling_pathw   | GBM | 0.030506768  |
| CDA  | Thiamine metabolism        | GBM | 0.198098474  |
| CDA  | Tnfa_signaling_via_nfkb    | GBM | 0.186439141  |
| CDA  | Tryptophan metabolism      | GBM | 0.311654631  |
| CDA  | Tumor endothelial cell     | GBM | 0.079810023  |
| CDA  | Tyrosine metabolism        | GBM | 0.303168067  |
| CDA  | Ubiquinone and other terp  | GBM | 0.217057234  |
| CDA  | Valine, leucine and isoleu | GBM | 0.21632211   |
| CDA  | Valine, leucine and isoleu | GBM | 0.076572729  |
| CDA  | Vascular endothelial cell  | GBM | 0.354529343  |
| CDA  | Vascular smooth muscle c   | GBM | 0.321263426  |
| CDA  | Vegf_signaling_pathway     | GBM | 0.129649781  |
| CDA  | Vitamin b6 metabolism      | GBM | 0.104860711  |
| CDA  | Willert_wnt_signaling      | GBM | 0.159934081  |
| CDA  | Wnt_beta_catenin_signali   | GBM | -0.130105483 |
| UCK1 | Abnormal plasma cell       | GBM | 0.027626939  |
| UCK1 | Activated b cell           | GBM | -0.157614195 |
| UCK1 | Activated cd4+ t cell      | GBM | -0.210704764 |
| UCK1 | Activated t cell           | GBM | -0.250129529 |
| UCK1 | Alanine, aspartate and glu | GBM | 0.016645458  |
| UCK1 | Alcala_apoptosis           | GBM | 0.031646349  |
| UCK1 | Alpha-linolenic acid meta  | GBM | 0.089520157  |

|      |                                      |     |              |
|------|--------------------------------------|-----|--------------|
| UCK1 | Amino sugar and nucleoti             | GBM | -0.148335304 |
| UCK1 | Ampk_pathway                         | GBM | 0.149913514  |
| UCK1 | Angiogenesis                         | GBM | -0.40715364  |
| UCK1 | Arachidonic acid metabol             | GBM | -0.109189018 |
| UCK1 | Arginine and proline metε            | GBM | 0.034235938  |
| UCK1 | Arginine biosynthesis                | GBM | -0.000495268 |
| UCK1 | Ascorbate and aldarate mε            | GBM | 0.061416833  |
| UCK1 | Atypical memory b cell               | GBM | -0.303532071 |
| UCK1 | Axl+siglec6+ dendritic ce            | GBM | -0.322328722 |
| UCK1 | B cell                               | GBM | -0.193137487 |
| UCK1 | B1 cell                              | GBM | -0.202110476 |
| UCK1 | Basal cell                           | GBM | -0.141150076 |
| UCK1 | Beta-alanine metabolism              | GBM | 0.005465265  |
| UCK1 | Biosynthesis of unsaturate           | GBM | 0.201722968  |
| UCK1 | Biotin metabolism                    | GBM | 0.156886971  |
| UCK1 | Butanoate metabolism                 | GBM | 0.248271527  |
| UCK1 | Caffeine metabolism                  | GBM | 0.129841413  |
| UCK1 | Cancer stem cell                     | GBM | -0.368802346 |
| UCK1 | Cancer stem-like cell                | GBM | -0.227083045 |
| UCK1 | Cd4+ cytotoxic t cell                | GBM | -0.230223906 |
| UCK1 | Cd4+ memory t cell                   | GBM | -0.235436863 |
| UCK1 | Cd4+ regulatory t cell               | GBM | -0.241746261 |
| UCK1 | Cd4+ t helper cell                   | GBM | -0.210300442 |
| UCK1 | Cd4+cd25+ regulatory t c             | GBM | -0.258349924 |
| UCK1 | Cd8+ cytotoxic t cell                | GBM | -0.198762723 |
| UCK1 | Cd8+ regulatory t cell               | GBM | -0.224480862 |
| UCK1 | Cell_cycle                           | GBM | 0.262485148  |
| UCK1 | Chandran_metastasis_top <sup>5</sup> | GBM | -0.094053876 |
| UCK1 | Citrate cycle (tca cycle)            | GBM | 0.163474196  |
| UCK1 | Cysteine and methionine r            | GBM | 0.094683105  |
| UCK1 | Cytokine induced killer cε           | GBM | -0.057519455 |
| UCK1 | D-arginine and d-ornithin            | GBM | 0.048188771  |
| UCK1 | D-glutamine and d-glutan             | GBM | 0.034170997  |
| UCK1 | Dendritic cell                       | GBM | -0.3675424   |
| UCK1 | Dna_repair                           | GBM | 0.381793058  |
| UCK1 | Dna_replication                      | GBM | 0.419715838  |
| UCK1 | Double-negative memory               | GBM | -0.121812962 |
| UCK1 | Drug metabolism - cytoch             | GBM | 0.116835887  |
| UCK1 | Drug metabolism - other ε            | GBM | 0.184477516  |
| UCK1 | E2f_targets                          | GBM | 0.313642989  |
| UCK1 | Ecm_receptor_interaction             | GBM | -0.457507123 |
| UCK1 | Effector cd4+ memory t (             | GBM | -0.267195899 |
| UCK1 | Effector cd8+ memory t (             | GBM | -0.325318485 |

|      |                              |     |              |
|------|------------------------------|-----|--------------|
| UCK1 | Effector memory t cell       | GBM | -0.207490886 |
| UCK1 | Effector regulatory t (treg  | GBM | -0.399367706 |
| UCK1 | Elvidge_hif1a_targets_up     | GBM | -0.100964031 |
| UCK1 | Endothelial cell             | GBM | -0.299452444 |
| UCK1 | Eosinophil                   | GBM | -0.228386701 |
| UCK1 | Ether lipid metabolism       | GBM | -0.054584092 |
| UCK1 | Exhausted cd4+ t cell        | GBM | -0.177545357 |
| UCK1 | Exhausted cd8+ t cell        | GBM | -0.25177091  |
| UCK1 | Exhausted t cell             | GBM | -0.155417042 |
| UCK1 | Fat cell (adipocyte)         | GBM | -0.119709714 |
| UCK1 | Fatty acid biosynthesis      | GBM | -0.158416576 |
| UCK1 | Fatty acid degradation       | GBM | 0.085769491  |
| UCK1 | Fatty acid elongation        | GBM | 0.082192422  |
| UCK1 | Fibroblast                   | GBM | -0.410048772 |
| UCK1 | Folate biosynthesis          | GBM | 0.305477967  |
| UCK1 | Follicular b cell            | GBM | -0.216661811 |
| UCK1 | Follicular dendritic cell    | GBM | -0.362312459 |
| UCK1 | Follicular helper (tfh) t ce | GBM | -0.32963077  |
| UCK1 | Follicular t cell            | GBM | -0.050165058 |
| UCK1 | Foxp3+il-17+ t cell          | GBM | -0.088671967 |
| UCK1 | Fructose and mannose me      | GBM | -0.057385853 |
| UCK1 | G2m_checkpoint               | GBM | 0.196798171  |
| UCK1 | Galactose metabolism         | GBM | -0.10273836  |
| UCK1 | Galie_tumor_stemness_ge      | GBM | -0.105311778 |
| UCK1 | Glutathione metabolism       | GBM | 0.022564601  |
| UCK1 | Glycerolipid metabolism      | GBM | -0.144568425 |
| UCK1 | Glycerophospholipid metæ     | GBM | -0.123066916 |
| UCK1 | Glycine, serine and threor   | GBM | 0.254988251  |
| UCK1 | Glycolysis / gluconeogene    | GBM | 0.011909923  |
| UCK1 | Glycosaminoglycan biosy1     | GBM | -0.331784764 |
| UCK1 | Glycosaminoglycan biosy1     | GBM | -0.412855189 |
| UCK1 | Glycosaminoglycan biosy1     | GBM | -0.363267277 |
| UCK1 | Glycosaminoglycan degra      | GBM | -0.328629115 |
| UCK1 | Glycosphingolipid biosyn1    | GBM | -0.303184536 |
| UCK1 | Glycosphingolipid biosyn1    | GBM | -0.37521366  |
| UCK1 | Glycosphingolipid biosyn1    | GBM | -0.018078651 |
| UCK1 | Glycosylphosphatidylinos:    | GBM | 0.071398869  |
| UCK1 | Glyoxylate and dicarboxy     | GBM | 0.309493354  |
| UCK1 | Granulocyte                  | GBM | -0.316079093 |
| UCK1 | Hedgehog_signaling           | GBM | -0.24413366  |
| UCK1 | Histidine metabolism         | GBM | 0.068066896  |
| UCK1 | Hypoxia                      | GBM | -0.263411436 |
| UCK1 | Il-17ralpha t cell           | GBM | -0.214557979 |

|      |                             |     |              |
|------|-----------------------------|-----|--------------|
| UCK1 | Il2_stat5_signaling         | GBM | -0.380389227 |
| UCK1 | Il6_jak_stat3_signaling     | GBM | -0.376268379 |
| UCK1 | Immune_checkpoints_tun      | GBM | -0.267771162 |
| UCK1 | Immune_inhibition_cytok     | GBM | -0.284029912 |
| UCK1 | Inositol phosphate metabo   | GBM | -0.230452701 |
| UCK1 | Interleukin_6_signaling     | GBM | -0.36381786  |
| UCK1 | Jaeger_metastasis_up        | GBM | -0.061725672 |
| UCK1 | Jain_nfkb_signaling         | GBM | 0.079285705  |
| UCK1 | Kras_signaling_up           | GBM | -0.39644134  |
| UCK1 | Linoleic acid metabolism    | GBM | 0.026297954  |
| UCK1 | Lipoic acid metabolism      | GBM | 0.178782708  |
| UCK1 | Lysine degradation          | GBM | 0.084341795  |
| UCK1 | Lysosome                    | GBM | -0.318358673 |
| UCK1 | M1 macrophage               | GBM | -0.255636129 |
| UCK1 | M2 macrophage               | GBM | -0.290071666 |
| UCK1 | Mannose type o-glycan bi    | GBM | 0.033048535  |
| UCK1 | Mapk_signaling_pathway      | GBM | -0.395135015 |
| UCK1 | Mapk3_erk1_activation       | GBM | -0.369070627 |
| UCK1 | Marginal zone b cell        | GBM | -0.240123894 |
| UCK1 | Memory b cell               | GBM | -0.23366543  |
| UCK1 | Mesenchymal cell            | GBM | -0.29196005  |
| UCK1 | Mesenchymal stem cell       | GBM | -0.349819701 |
| UCK1 | Metabolism of xenobiotic    | GBM | 0.141401474  |
| UCK1 | Migrating cancer stem cel   | GBM | -0.201779364 |
| UCK1 | Mitotic_spindle             | GBM | -0.046045924 |
| UCK1 | Monocyte                    | GBM | -0.262903204 |
| UCK1 | Mtor_signaling_pathway      | GBM | -0.164131803 |
| UCK1 | Mtorc1_signaling            | GBM | -0.057826036 |
| UCK1 | Mucin type o-glycan biosy   | GBM | -0.421002416 |
| UCK1 | Myc_targets_v1              | GBM | 0.233873371  |
| UCK1 | Myeloid cell                | GBM | -0.337922709 |
| UCK1 | N-glycan biosynthesis       | GBM | -0.008238784 |
| UCK1 | Naive b cell                | GBM | 0.198165506  |
| UCK1 | Naive cd4+ t cell           | GBM | -0.301056573 |
| UCK1 | Naive cd8+ t cell           | GBM | -0.319984414 |
| UCK1 | Natural killer cell         | GBM | -0.282233637 |
| UCK1 | Natural killer t (nkt) cell | GBM | -0.037498156 |
| UCK1 | Natural regulatory t (treg) | GBM | -0.273944563 |
| UCK1 | Neomycin, kanamycin an      | GBM | -0.230085244 |
| UCK1 | Neutrophil                  | GBM | -0.290535081 |
| UCK1 | Nicotinate and nicotinami   | GBM | 0.019407785  |
| UCK1 | Nitrogen metabolism         | GBM | 0.107261589  |
| UCK1 | Nod_like_receptor_signal    | GBM | -0.433733128 |

|      |                            |     |              |
|------|----------------------------|-----|--------------|
| UCK1 | Notch_signaling            | GBM | -0.169042838 |
| UCK1 | One carbon pool by folate  | GBM | 0.151312857  |
| UCK1 | Other glycan degradation   | GBM | -0.319084143 |
| UCK1 | Other types of o-glycan b  | GBM | -0.169390712 |
| UCK1 | Oxidative phosphorylatior  | GBM | 0.199167173  |
| UCK1 | P53_pathway                | GBM | -0.190947835 |
| UCK1 | P53_signaling_pathway      | GBM | -0.131471567 |
| UCK1 | Pantothenate and coa bios  | GBM | -0.197097087 |
| UCK1 | Pentose and glucuronate i  | GBM | 0.00761766   |
| UCK1 | Pentose phosphate pathwa   | GBM | 0.170303762  |
| UCK1 | Pericyte                   | GBM | -0.371677833 |
| UCK1 | Phenylalanine metabolism   | GBM | -0.030791453 |
| UCK1 | Phenylalanine, tyrosine ar | GBM | 0.100772186  |
| UCK1 | Phosphonate and phosphir   | GBM | 0.003566533  |
| UCK1 | Pi3k_akt_activation        | GBM | -0.279319424 |
| UCK1 | Pi3k_akt_mtor_signaling    | GBM | -0.200018822 |
| UCK1 | Porphyrin and chlorophyl   | GBM | 0.136040422  |
| UCK1 | Primary bile acid biosynt  | GBM | -0.052043014 |
| UCK1 | Propanoate metabolism      | GBM | 0.047825517  |
| UCK1 | Purine metabolism          | GBM | 0.191777785  |
| UCK1 | Pyrimidine metabolism      | GBM | 0.277088645  |
| UCK1 | Pyruvate metabolism        | GBM | 0.207259052  |
| UCK1 | Regulation_of_autophagy    | GBM | 0.078452168  |
| UCK1 | Retinol metabolism         | GBM | 0.103928382  |
| UCK1 | Riboflavin metabolism      | GBM | 0.034335465  |
| UCK1 | Schmahl_pdgf_signaling     | GBM | -0.147588095 |
| UCK1 | Selenocompound metabol     | GBM | 0.117798583  |
| UCK1 | Signaling_by_hippo         | GBM | -0.235112156 |
| UCK1 | Sphingolipid metabolism    | GBM | -0.215617894 |
| UCK1 | Starch and sucrose metabo  | GBM | -0.27788388  |
| UCK1 | Steroid biosynthesis       | GBM | 0.206173093  |
| UCK1 | Steroid hormone biosynth   | GBM | 0.080628275  |
| UCK1 | Sulfur metabolism          | GBM | -0.008996788 |
| UCK1 | Synthesis and degradation  | GBM | 0.262610351  |
| UCK1 | T helper cell              | GBM | -0.30126298  |
| UCK1 | T helper1 (th1) cell       | GBM | -0.27368919  |
| UCK1 | T helper17 (th17) cell     | GBM | -0.35827019  |
| UCK1 | T helper2 (th2) cell       | GBM | -0.247302054 |
| UCK1 | T helper9 (th9) cell       | GBM | -0.229101444 |
| UCK1 | Taurine and hypotaurine r  | GBM | -0.044331227 |
| UCK1 | Terpenoid backbone biosy   | GBM | 0.206402538  |
| UCK1 | Tgf_beta_signaling_pathw   | GBM | -0.39097877  |
| UCK1 | Thiamine metabolism        | GBM | 0.255895339  |



|      |                            |     |              |
|------|----------------------------|-----|--------------|
| UCK1 | Tnfa_signaling_via_nfk     | GBM | -0.326424529 |
| UCK1 | Tryptophan metabolism      | GBM | 0.00136193   |
| UCK1 | Tumor endothelial cell     | GBM | -0.239185717 |
| UCK1 | Tyrosine metabolism        | GBM | 0.092495993  |
| UCK1 | Ubiquinone and other ter   | GBM | 0.113244646  |
| UCK1 | Valine, leucine and isoleu | GBM | -0.074817281 |
| UCK1 | Valine, leucine and isoleu | GBM | 0.23114481   |
| UCK1 | Vascular endothelial cell  | GBM | -0.345367478 |
| UCK1 | Vascular smooth muscle c   | GBM | -0.327152067 |
| UCK1 | Vegf_signaling_pathway     | GBM | -0.341014126 |
| UCK1 | Vitamin b6 metabolism      | GBM | 0.174818451  |
| UCK1 | Willert_wnt_signaling      | GBM | 0.030273678  |
| UCK1 | Wnt_beta_catenin_signali   | GBM | -0.017476095 |
| UCK2 | Abnormal plasma cell       | GBM | 0.150925794  |
| UCK2 | Activated b cell           | GBM | -0.10026731  |
| UCK2 | Activated cd4+ t cell      | GBM | -0.164860444 |
| UCK2 | Activated t cell           | GBM | 0.150552766  |
| UCK2 | Alanine, aspartate and glu | GBM | -0.265517289 |
| UCK2 | Alcala_apoptosis           | GBM | 0.279233622  |
| UCK2 | Alpha-linolenic acid meta  | GBM | -0.43982255  |
| UCK2 | Amino sugar and nucleoti   | GBM | 0.265005739  |
| UCK2 | Ampk_pathway               | GBM | 0.187141913  |
| UCK2 | Angiogenesis               | GBM | 0.114712955  |
| UCK2 | Arachidonic acid metabol   | GBM | -0.272372304 |
| UCK2 | Arginine and proline metæ  | GBM | -0.139311695 |
| UCK2 | Arginine biosynthesis      | GBM | -0.14988674  |
| UCK2 | Ascorbate and aldarate me  | GBM | -0.041650275 |
| UCK2 | Atypical memory b cell     | GBM | 0.200006103  |
| UCK2 | Axl+siglec6+ dendritic ce  | GBM | -0.194618712 |
| UCK2 | B cell                     | GBM | -0.108696441 |
| UCK2 | B1 cell                    | GBM | -0.086282852 |
| UCK2 | Basal cell                 | GBM | 0.11213414   |
| UCK2 | Beta-alanine metabolism    | GBM | -0.296121541 |
| UCK2 | Biosynthesis of unsaturate | GBM | -0.138209839 |
| UCK2 | Biotin metabolism          | GBM | -0.027653826 |
| UCK2 | Butanoate metabolism       | GBM | -0.264171239 |
| UCK2 | Caffeine metabolism        | GBM | -0.150775429 |
| UCK2 | Cancer stem cell           | GBM | 0.059540367  |
| UCK2 | Cancer stem-like cell      | GBM | 0.141304662  |
| UCK2 | Cd4+ cytotoxic t cell      | GBM | -0.117051952 |
| UCK2 | Cd4+ memory t cell         | GBM | 0.136074144  |
| UCK2 | Cd4+ regulatory t cell     | GBM | -0.032000269 |
| UCK2 | Cd4+ t helper cell         | GBM | -0.140443786 |

|      |                             |     |              |
|------|-----------------------------|-----|--------------|
| UCK2 | Cd4+cd25+ regulatory t c    | GBM | -0.080046275 |
| UCK2 | Cd8+ cytotoxic t cell       | GBM | 0.110437632  |
| UCK2 | Cd8+ regulatory t cell      | GBM | 0.176515339  |
| UCK2 | Cell_cycle                  | GBM | 0.565175676  |
| UCK2 | Chandran_metastasis_top5    | GBM | 0.212085916  |
| UCK2 | Citrate cycle (tca cycle)   | GBM | 0.137870498  |
| UCK2 | Cysteine and methionine r   | GBM | 0.111242391  |
| UCK2 | Cytokine induced killer c   | GBM | -0.107046952 |
| UCK2 | D-arginine and d-ornithin   | GBM | -0.342700652 |
| UCK2 | D-glutamine and d-glutan    | GBM | -0.150345881 |
| UCK2 | Dendritic cell              | GBM | -0.067233415 |
| UCK2 | Dna_repair                  | GBM | 0.387137721  |
| UCK2 | Dna_replication             | GBM | 0.52844239   |
| UCK2 | Double-negative memory      | GBM | 0.075594454  |
| UCK2 | Drug metabolism - cytoch    | GBM | -0.111123127 |
| UCK2 | Drug metabolism - other c   | GBM | 0.229281269  |
| UCK2 | E2f_targets                 | GBM | 0.544138435  |
| UCK2 | Ecm_receptor_interaction    | GBM | 0.0752629    |
| UCK2 | Effector cd4+ memory t (    | GBM | -0.149208042 |
| UCK2 | Effector cd8+ memory t (    | GBM | -0.119906664 |
| UCK2 | Effector memory t cell      | GBM | -0.111338786 |
| UCK2 | Effector regulatory t (treg | GBM | 0.114527892  |
| UCK2 | Elvidge_hif1a_targets_up    | GBM | 0.237536103  |
| UCK2 | Endothelial cell            | GBM | 0.265843569  |
| UCK2 | Eosinophil                  | GBM | -0.140947043 |
| UCK2 | Ether lipid metabolism      | GBM | -0.393387969 |
| UCK2 | Exhausted cd4+ t cell       | GBM | -0.082752845 |
| UCK2 | Exhausted cd8+ t cell       | GBM | -0.071535047 |
| UCK2 | Exhausted t cell            | GBM | -0.030279225 |
| UCK2 | Fat cell (adipocyte)        | GBM | 0.042726801  |
| UCK2 | Fatty acid biosynthesis     | GBM | -0.305266779 |
| UCK2 | Fatty acid degradation      | GBM | -0.314027097 |
| UCK2 | Fatty acid elongation       | GBM | -0.000552811 |
| UCK2 | Fibroblast                  | GBM | 0.16123844   |
| UCK2 | Folate biosynthesis         | GBM | 0.020696731  |
| UCK2 | Follicular b cell           | GBM | -0.114767678 |
| UCK2 | Follicular dendritic cell   | GBM | 0.029328157  |
| UCK2 | Follicular helper (tfh) t c | GBM | 0.017595289  |
| UCK2 | Follicular t cell           | GBM | 0.172100621  |
| UCK2 | Foxp3+il-17+ t cell         | GBM | -0.038963231 |
| UCK2 | Fructose and mannose me     | GBM | 0.062195505  |
| UCK2 | G2m_checkpoint              | GBM | 0.51567281   |
| UCK2 | Galactose metabolism        | GBM | 0.182840137  |

|      |                            |     |              |
|------|----------------------------|-----|--------------|
| UCK2 | Galie_tumor_stemness_ge    | GBM | 0.190904876  |
| UCK2 | Glutathione metabolism     | GBM | 0.153734927  |
| UCK2 | Glycerolipid metabolism    | GBM | -0.142085807 |
| UCK2 | Glycerophospholipid metæ   | GBM | -0.418829034 |
| UCK2 | Glycine, serine and threor | GBM | -0.221115084 |
| UCK2 | Glycolysis / gluconeogene  | GBM | 0.113517689  |
| UCK2 | Glycosaminoglycan biosy1   | GBM | 0.164760156  |
| UCK2 | Glycosaminoglycan biosy1   | GBM | 0.19166424   |
| UCK2 | Glycosaminoglycan biosy1   | GBM | 0.226079611  |
| UCK2 | Glycosaminoglycan degra    | GBM | 0.035707916  |
| UCK2 | Glycosphingolipid biosyn1  | GBM | 0.131826771  |
| UCK2 | Glycosphingolipid biosyn1  | GBM | 0.08139366   |
| UCK2 | Glycosphingolipid biosyn1  | GBM | 0.115450266  |
| UCK2 | Glycosylphosphatidylinos:  | GBM | -0.073543817 |
| UCK2 | Glyoxylate and dicarboxy   | GBM | 0.101553601  |
| UCK2 | Granulocyte                | GBM | -0.057331796 |
| UCK2 | Hedgehog_signaling         | GBM | 0.070255816  |
| UCK2 | Histidine metabolism       | GBM | -0.455258804 |
| UCK2 | Hypoxia                    | GBM | 0.123936615  |
| UCK2 | Il-17ralpha t cell         | GBM | 0.037358809  |
| UCK2 | Il2_stat5_signaling        | GBM | 0.044451188  |
| UCK2 | Il6_jak_stat3_signaling    | GBM | -0.026610101 |
| UCK2 | Immune_checkpoints_tunr    | GBM | 0.067159323  |
| UCK2 | Immune_inhibition_cytok    | GBM | 0.022722033  |
| UCK2 | Inositol phosphate metabo  | GBM | -0.276125044 |
| UCK2 | Interleukin_6_signaling    | GBM | -0.180264297 |
| UCK2 | Jaeger_metastasis_up       | GBM | 0.440703681  |
| UCK2 | Jain_nfkb_signaling        | GBM | 0.454599258  |
| UCK2 | Kras_signaling_up          | GBM | -0.034738776 |
| UCK2 | Linoleic acid metabolism   | GBM | -0.426174242 |
| UCK2 | Lipoic acid metabolism     | GBM | -0.041178161 |
| UCK2 | Lysine degradation         | GBM | 0.03213147   |
| UCK2 | Lysosome                   | GBM | -0.041928611 |
| UCK2 | M1 macrophage              | GBM | -0.084886246 |
| UCK2 | M2 macrophage              | GBM | 0.005286045  |
| UCK2 | Mannose type o-glycan bi   | GBM | 0.087118352  |
| UCK2 | Mapk_signaling_pathway     | GBM | -0.122763177 |
| UCK2 | Mapk3_erk1_activation      | GBM | -0.171575395 |
| UCK2 | Marginal zone b cell       | GBM | -0.084641978 |
| UCK2 | Memory b cell              | GBM | -0.137902047 |
| UCK2 | Mesenchymal cell           | GBM | 0.30383295   |
| UCK2 | Mesenchymal stem cell      | GBM | -0.099785582 |
| UCK2 | Metabolism of xenobiotic:  | GBM | -0.041722794 |

|      |                             |     |              |
|------|-----------------------------|-----|--------------|
| UCK2 | Migrating cancer stem cel   | GBM | -0.022522703 |
| UCK2 | Mitotic_spindle             | GBM | 0.075900977  |
| UCK2 | Monocyte                    | GBM | -0.081053126 |
| UCK2 | Mtor_signaling_pathway      | GBM | -0.019639977 |
| UCK2 | Mtorc1_signaling            | GBM | 0.394118242  |
| UCK2 | Mucin type o-glycan biosy   | GBM | -0.000578239 |
| UCK2 | Myc_targets_v1              | GBM | 0.594955459  |
| UCK2 | Myeloid cell                | GBM | -0.105674502 |
| UCK2 | N-glycan biosynthesis       | GBM | 0.480248325  |
| UCK2 | Naive b cell                | GBM | -0.055231793 |
| UCK2 | Naive cd4+ t cell           | GBM | -0.043064626 |
| UCK2 | Naive cd8+ t cell           | GBM | -0.164444049 |
| UCK2 | Natural killer cell         | GBM | -0.046577361 |
| UCK2 | Natural killer t (nkt) cell | GBM | 0.29489305   |
| UCK2 | Natural regulatory t (treg) | GBM | -0.04537333  |
| UCK2 | Neomycin, kanamycin and     | GBM | 0.122198635  |
| UCK2 | Neutrophil                  | GBM | -0.030959213 |
| UCK2 | Nicotinate and nicotinami   | GBM | -0.187119607 |
| UCK2 | Nitrogen metabolism         | GBM | -0.33275306  |
| UCK2 | Nod_like_receptor_signal    | GBM | -0.079901256 |
| UCK2 | Notch_signaling             | GBM | 0.001216031  |
| UCK2 | One carbon pool by folate   | GBM | 0.408424821  |
| UCK2 | Other glycan degradation    | GBM | 0.022103186  |
| UCK2 | Other types of o-glycan b   | GBM | 0.147289072  |
| UCK2 | Oxidative phosphorylatio    | GBM | 0.137354156  |
| UCK2 | P53_pathway                 | GBM | 0.041797565  |
| UCK2 | P53_signaling_pathway       | GBM | 0.399175317  |
| UCK2 | Pantothenate and coa bios   | GBM | 0.115488238  |
| UCK2 | Pentose and glucuronate i   | GBM | 0.182222779  |
| UCK2 | Pentose phosphate pathwa    | GBM | 0.201726186  |
| UCK2 | Pericyte                    | GBM | 0.154327175  |
| UCK2 | Phenylalanine metabolism    | GBM | -0.241103511 |
| UCK2 | Phenylalanine, tyrosine ar  | GBM | -0.249877264 |
| UCK2 | Phosphonate and phosphir    | GBM | -0.273001906 |
| UCK2 | Pi3k_akt_activation         | GBM | 0.056593563  |
| UCK2 | Pi3k_akt_mtor_signaling     | GBM | 0.106526175  |
| UCK2 | Porphyrin and chlorophyl    | GBM | 0.130122982  |
| UCK2 | Primary bile acid biosynt   | GBM | -0.444482939 |
| UCK2 | Propanoate metabolism       | GBM | -0.236196014 |
| UCK2 | Purine metabolism           | GBM | 0.542599279  |
| UCK2 | Pyrimidine metabolism       | GBM | 0.49781436   |
| UCK2 | Pyruvate metabolism         | GBM | -0.048206414 |
| UCK2 | Regulation_of_autophagy     | GBM | -0.282667725 |

|       |                            |     |              |
|-------|----------------------------|-----|--------------|
| UCK2  | Retinol metabolism         | GBM | -0.179063301 |
| UCK2  | Riboflavin metabolism      | GBM | 0.187836165  |
| UCK2  | Schmahl_pdgf_signaling     | GBM | -0.119352063 |
| UCK2  | Selenocompound metabol     | GBM | 0.206668706  |
| UCK2  | Signaling_by_hippo         | GBM | -0.212316391 |
| UCK2  | Sphingolipid metabolism    | GBM | -0.108954807 |
| UCK2  | Starch and sucrose metabo  | GBM | -0.240233685 |
| UCK2  | Steroid biosynthesis       | GBM | 0.323957193  |
| UCK2  | Steroid hormone biosynth   | GBM | -0.254764131 |
| UCK2  | Sulfur metabolism          | GBM | 0.199500711  |
| UCK2  | Synthesis and degradation  | GBM | -0.148630749 |
| UCK2  | T helper cell              | GBM | -0.11064443  |
| UCK2  | T helper1 (th1) cell       | GBM | -0.078321067 |
| UCK2  | T helper17 (th17) cell     | GBM | -0.035651837 |
| UCK2  | T helper2 (th2) cell       | GBM | -0.038944211 |
| UCK2  | T helper9 (th9) cell       | GBM | -0.006517793 |
| UCK2  | Taurine and hypotaurine r  | GBM | -0.055243122 |
| UCK2  | Terpenoid backbone biosy   | GBM | 0.276093676  |
| UCK2  | Tgf_beta_signaling_pathw   | GBM | 0.192223647  |
| UCK2  | Thiamine metabolism        | GBM | -0.182927861 |
| UCK2  | Tnfa_signaling_via_nfbk    | GBM | 0.05655554   |
| UCK2  | Tryptophan metabolism      | GBM | -0.2229863   |
| UCK2  | Tumor endothelial cell     | GBM | -0.043338258 |
| UCK2  | Tyrosine metabolism        | GBM | -0.241740066 |
| UCK2  | Ubiquinone and other terp  | GBM | 0.061625176  |
| UCK2  | Valine, leucine and isoleu | GBM | 0.01749023   |
| UCK2  | Valine, leucine and isoleu | GBM | -0.25067903  |
| UCK2  | Vascular endothelial cell  | GBM | 0.070741197  |
| UCK2  | Vascular smooth muscle c   | GBM | 0.072575044  |
| UCK2  | Vegf_signaling_pathway     | GBM | -0.043015792 |
| UCK2  | Vitamin b6 metabolism      | GBM | -0.378194088 |
| UCK2  | Willert_wnt_signaling      | GBM | 0.224535805  |
| UCK2  | Wnt_beta_catenin_signali   | GBM | 0.19815741   |
| UCKL1 | Abnormal plasma cell       | GBM | -0.123504702 |
| UCKL1 | Activated b cell           | GBM | -0.255304203 |
| UCKL1 | Activated cd4+ t cell      | GBM | -0.33158648  |
| UCKL1 | Activated t cell           | GBM | -0.181071636 |
| UCKL1 | Alanine, aspartate and glu | GBM | -0.148262159 |
| UCKL1 | Alcala_apoptosis           | GBM | -0.050901699 |
| UCKL1 | Alpha-linolenic acid meta  | GBM | -0.140239926 |
| UCKL1 | Amino sugar and nucleoti   | GBM | -0.187193649 |
| UCKL1 | Ampk_pathway               | GBM | 0.280084746  |
| UCKL1 | Angiogenesis               | GBM | -0.144506925 |

|       |                                 |              |
|-------|---------------------------------|--------------|
| UCKL1 | Arachidonic acid metabol: GBM   | -0.192346485 |
| UCKL1 | Arginine and proline metæ GBM   | -0.241820163 |
| UCKL1 | Arginine biosynthesis GBM       | -0.173344418 |
| UCKL1 | Ascorbate and aldarate mε GBM   | -0.203648421 |
| UCKL1 | Atypical memory b cell GBM      | -0.155945264 |
| UCKL1 | Axl+siglec6+ dendritic ce GBM   | -0.281920414 |
| UCKL1 | B cell GBM                      | -0.337314587 |
| UCKL1 | B1 cell GBM                     | -0.263820494 |
| UCKL1 | Basal cell GBM                  | -0.155559791 |
| UCKL1 | Beta-alanine metabolism GBM     | -0.273253535 |
| UCKL1 | Biosynthesis of unsaturate GBM  | -0.099158061 |
| UCKL1 | Biotin metabolism GBM           | 0.018806588  |
| UCKL1 | Butanoate metabolism GBM        | -0.125569008 |
| UCKL1 | Caffeine metabolism GBM         | -0.267180015 |
| UCKL1 | Cancer stem cell GBM            | -0.248671937 |
| UCKL1 | Cancer stem-like cell GBM       | -0.220951737 |
| UCKL1 | Cd4+ cytotoxic t cell GBM       | -0.308919826 |
| UCKL1 | Cd4+ memory t cell GBM          | -0.200730221 |
| UCKL1 | Cd4+ regulatory t cell GBM      | -0.290343917 |
| UCKL1 | Cd4+ t helper cell GBM          | -0.292405445 |
| UCKL1 | Cd4+cd25+ regulatory t c GBM    | -0.286415957 |
| UCKL1 | Cd8+ cytotoxic t cell GBM       | -0.11373959  |
| UCKL1 | Cd8+ regulatory t cell GBM      | -0.11760058  |
| UCKL1 | Cell_cycle GBM                  | 0.139370036  |
| UCKL1 | Chandran_metastasis_topδ GBM    | -0.141784671 |
| UCKL1 | Citrate cycle (tca cycle) GBM   | -0.020028818 |
| UCKL1 | Cysteine and methionine r GBM   | 0.175521471  |
| UCKL1 | Cytokine induced killer cε GBM  | -0.118982993 |
| UCKL1 | D-arginine and d-ornithin GBM   | -0.113663466 |
| UCKL1 | D-glutamine and d-glutan GBM    | -0.029892155 |
| UCKL1 | Dendritic cell GBM              | -0.255410726 |
| UCKL1 | Dna_repair GBM                  | 0.286446568  |
| UCKL1 | Dna_replication GBM             | 0.160596232  |
| UCKL1 | Double-negative memory GBM      | -0.029807989 |
| UCKL1 | Drug metabolism - cytoch GBM    | -0.209653002 |
| UCKL1 | Drug metabolism - other ε GBM   | -0.000369572 |
| UCKL1 | E2f_targets GBM                 | 0.186885261  |
| UCKL1 | Ecm_receptor_interaction GBM    | -0.225293237 |
| UCKL1 | Effector cd4+ memory t ( GBM    | -0.317410569 |
| UCKL1 | Effector cd8+ memory t ( GBM    | -0.337747824 |
| UCKL1 | Effector memory t cell GBM      | -0.342418335 |
| UCKL1 | Effector regulatory t (treg GBM | -0.272841762 |
| UCKL1 | Elvidge_hif1a_targets_up GBM    | -0.191845352 |

|       |                              |     |              |
|-------|------------------------------|-----|--------------|
| UCKL1 | Endothelial cell             | GBM | -0.125742704 |
| UCKL1 | Eosinophil                   | GBM | -0.283224687 |
| UCKL1 | Ether lipid metabolism       | GBM | -0.19389518  |
| UCKL1 | Exhausted cd4+ t cell        | GBM | -0.306823015 |
| UCKL1 | Exhausted cd8+ t cell        | GBM | -0.278721373 |
| UCKL1 | Exhausted t cell             | GBM | -0.204030816 |
| UCKL1 | Fat cell (adipocyte)         | GBM | -0.157382233 |
| UCKL1 | Fatty acid biosynthesis      | GBM | -0.152511334 |
| UCKL1 | Fatty acid degradation       | GBM | -0.106984533 |
| UCKL1 | Fatty acid elongation        | GBM | -0.094821887 |
| UCKL1 | Fibroblast                   | GBM | -0.29514754  |
| UCKL1 | Folate biosynthesis          | GBM | -0.100153071 |
| UCKL1 | Follicular b cell            | GBM | -0.364010468 |
| UCKL1 | Follicular dendritic cell    | GBM | -0.199911839 |
| UCKL1 | Follicular helper (tfh) t ce | GBM | -0.289409713 |
| UCKL1 | Follicular t cell            | GBM | -0.03399582  |
| UCKL1 | Foxp3+il-17+ t cell          | GBM | -0.028236824 |
| UCKL1 | Fructose and mannose me      | GBM | -0.197787558 |
| UCKL1 | G2m_checkpoint               | GBM | 0.09374314   |
| UCKL1 | Galactose metabolism         | GBM | -0.18468755  |
| UCKL1 | Galie_tumor_stemness_ge      | GBM | -0.216828284 |
| UCKL1 | Glutathione metabolism       | GBM | -0.041985176 |
| UCKL1 | Glycerolipid metabolism      | GBM | -0.181129894 |
| UCKL1 | Glycerophospholipid metæ     | GBM | -0.037154285 |
| UCKL1 | Glycine, serine and threor   | GBM | -0.057637306 |
| UCKL1 | Glycolysis / gluconeogene    | GBM | -0.244089694 |
| UCKL1 | Glycosaminoglycan biosy1     | GBM | -0.106525027 |
| UCKL1 | Glycosaminoglycan biosy1     | GBM | -0.097565624 |
| UCKL1 | Glycosaminoglycan biosy1     | GBM | -0.142033649 |
| UCKL1 | Glycosaminoglycan degra      | GBM | -0.109352876 |
| UCKL1 | Glycosphingolipid biosyn1    | GBM | -0.292333375 |
| UCKL1 | Glycosphingolipid biosyn1    | GBM | -0.286517156 |
| UCKL1 | Glycosphingolipid biosyn1    | GBM | 0.043691371  |
| UCKL1 | Glycosylphosphatidylinos     | GBM | 0.211819401  |
| UCKL1 | Glyoxylate and dicarboxy     | GBM | 0.000605093  |
| UCKL1 | Granulocyte                  | GBM | -0.273624984 |
| UCKL1 | Hedgehog_signaling           | GBM | -0.196145531 |
| UCKL1 | Histidine metabolism         | GBM | -0.277227004 |
| UCKL1 | Hypoxia                      | GBM | -0.244744171 |
| UCKL1 | Il-17alpha t cell            | GBM | -0.142113412 |
| UCKL1 | Il2_stat5_signaling          | GBM | -0.26790145  |
| UCKL1 | Il6_jak_stat3_signaling      | GBM | -0.26246374  |
| UCKL1 | Immune_checkpoints_turr      | GBM | -0.297336362 |

|       |                             |     |              |
|-------|-----------------------------|-----|--------------|
| UCKL1 | Immune_inhibition_cytok     | GBM | -0.147458385 |
| UCKL1 | Inositol phosphate metabo   | GBM | -0.323104192 |
| UCKL1 | Interleukin_6_signaling     | GBM | -0.330536492 |
| UCKL1 | Jaeger_metastasis_up        | GBM | -0.245033197 |
| UCKL1 | Jain_nfkb_signaling         | GBM | 0.053029348  |
| UCKL1 | Kras_signaling_up           | GBM | -0.406042103 |
| UCKL1 | Linoleic acid metabolism    | GBM | -0.095250229 |
| UCKL1 | Lipoic acid metabolism      | GBM | 0.212853605  |
| UCKL1 | Lysine degradation          | GBM | 0.087574603  |
| UCKL1 | Lysosome                    | GBM | -0.276956065 |
| UCKL1 | M1 macrophage               | GBM | -0.301641412 |
| UCKL1 | M2 macrophage               | GBM | -0.289080689 |
| UCKL1 | Mannose type o-glycan bi    | GBM | 0.247784005  |
| UCKL1 | Mapk_signaling_pathway      | GBM | -0.225424339 |
| UCKL1 | Mapk3_erk1_activation       | GBM | -0.328380832 |
| UCKL1 | Marginal zone b cell        | GBM | -0.224582305 |
| UCKL1 | Memory b cell               | GBM | -0.317377679 |
| UCKL1 | Mesenchymal cell            | GBM | -0.073595568 |
| UCKL1 | Mesenchymal stem cell       | GBM | -0.36809886  |
| UCKL1 | Metabolism of xenobiotic    | GBM | -0.140634813 |
| UCKL1 | Migrating cancer stem cel   | GBM | -0.367643266 |
| UCKL1 | Mitotic_spindle             | GBM | -0.095483513 |
| UCKL1 | Monocyte                    | GBM | -0.271995472 |
| UCKL1 | Mtor_signaling_pathway      | GBM | -0.079951816 |
| UCKL1 | Mtorc1_signaling            | GBM | -0.218665816 |
| UCKL1 | Mucin type o-glycan biosy   | GBM | -0.378737279 |
| UCKL1 | Myc_targets_v1              | GBM | 0.150163606  |
| UCKL1 | Myeloid cell                | GBM | -0.328083625 |
| UCKL1 | N-glycan biosynthesis       | GBM | 0.054150335  |
| UCKL1 | Naive b cell                | GBM | -0.23308851  |
| UCKL1 | Naive cd4+ t cell           | GBM | -0.356186189 |
| UCKL1 | Naive cd8+ t cell           | GBM | -0.276133845 |
| UCKL1 | Natural killer cell         | GBM | -0.27601055  |
| UCKL1 | Natural killer t (nkt) cell | GBM | 0.039952969  |
| UCKL1 | Natural regulatory t (treg) | GBM | -0.312888477 |
| UCKL1 | Neomycin, kanamycin and     | GBM | -0.325053001 |
| UCKL1 | Neutrophil                  | GBM | -0.272646045 |
| UCKL1 | Nicotinate and nicotinami   | GBM | -0.135495482 |
| UCKL1 | Nitrogen metabolism         | GBM | -0.228843071 |
| UCKL1 | Nod_like_receptor_signal    | GBM | -0.294823096 |
| UCKL1 | Notch_signaling             | GBM | 0.070649938  |
| UCKL1 | One carbon pool by folate   | GBM | 0.112954526  |
| UCKL1 | Other glycan degradation    | GBM | -0.061698068 |



|       |                                                   |     |              |
|-------|---------------------------------------------------|-----|--------------|
| UCKL1 | Other types of o-glycan b                         | GBM | 0.299677332  |
| UCKL1 | Oxidative phosphorylation                         | GBM | 0.073735532  |
| UCKL1 | P53_pathway                                       | GBM | -0.209614261 |
| UCKL1 | P53_signaling_pathway                             | GBM | -0.007208223 |
| UCKL1 | Pantothenate and coa biosynthesis                 | GBM | -0.048804492 |
| UCKL1 | Pentose and glucuronate interconversions          | GBM | -0.113224973 |
| UCKL1 | Pentose phosphate pathway                         | GBM | -0.298852115 |
| UCKL1 | Pericyte                                          | GBM | -0.150378412 |
| UCKL1 | Phenylalanine metabolism                          | GBM | -0.290259779 |
| UCKL1 | Phenylalanine, tyrosine and tryptophan metabolism | GBM | -0.084349582 |
| UCKL1 | Phosphonate and phosphite metabolism              | GBM | -0.302037734 |
| UCKL1 | Pi3k_akt_activation                               | GBM | -0.385105272 |
| UCKL1 | Pi3k_akt_mtor_signaling                           | GBM | -0.258284727 |
| UCKL1 | Porphyrin and chlorophyll metabolism              | GBM | -0.07456757  |
| UCKL1 | Primary bile acid biosynthesis                    | GBM | -0.330593262 |
| UCKL1 | Propanoate metabolism                             | GBM | -0.103737831 |
| UCKL1 | Purine metabolism                                 | GBM | 0.084080744  |
| UCKL1 | Pyrimidine metabolism                             | GBM | 0.253292657  |
| UCKL1 | Pyruvate metabolism                               | GBM | -0.155922119 |
| UCKL1 | Regulation_of_autophagy                           | GBM | -0.14020329  |
| UCKL1 | Retinol metabolism                                | GBM | -0.128057888 |
| UCKL1 | Riboflavin metabolism                             | GBM | -0.062295939 |
| UCKL1 | Schmahl_pdgf_signaling                            | GBM | -0.491132587 |
| UCKL1 | Selenocompound metabolism                         | GBM | 0.165819647  |
| UCKL1 | Signaling_by_hippo                                | GBM | -0.336675096 |
| UCKL1 | Sphingolipid metabolism                           | GBM | -0.351153425 |
| UCKL1 | Starch and sucrose metabolism                     | GBM | -0.256986187 |
| UCKL1 | Steroid biosynthesis                              | GBM | 0.150974683  |
| UCKL1 | Steroid hormone biosynthesis                      | GBM | -0.183583588 |
| UCKL1 | Sulfur metabolism                                 | GBM | 0.052788491  |
| UCKL1 | Synthesis and degradation of ribonucleotides      | GBM | -0.153211182 |
| UCKL1 | T helper cell                                     | GBM | -0.299056919 |
| UCKL1 | T helper1 (th1) cell                              | GBM | -0.26658428  |
| UCKL1 | T helper17 (th17) cell                            | GBM | -0.263135362 |
| UCKL1 | T helper2 (th2) cell                              | GBM | -0.243903627 |
| UCKL1 | T helper9 (th9) cell                              | GBM | -0.230278855 |
| UCKL1 | Taurine and hypotaurine interconversions          | GBM | 0.277904375  |
| UCKL1 | Terpenoid backbone biosynthesis                   | GBM | -0.03135744  |
| UCKL1 | Tgf_beta_signaling_pathway                        | GBM | -0.220981876 |
| UCKL1 | Thiamine metabolism                               | GBM | -0.136021713 |
| UCKL1 | Tnfa_signaling_via_nfb                            | GBM | -0.225373076 |
| UCKL1 | Tryptophan metabolism                             | GBM | -0.281141493 |
| UCKL1 | Tumor endothelial cell                            | GBM | -0.042439177 |

|       |                                   |     |              |
|-------|-----------------------------------|-----|--------------|
| UCKL1 | Tyrosine metabolism               | GBM | -0.261608616 |
| UCKL1 | Ubiquinone and other terpenoid    | GBM | 0.116538043  |
| UCKL1 | Valine, leucine and isoleucine    | GBM | 0.150236141  |
| UCKL1 | Valine, leucine and isoleucine    | GBM | -0.097737763 |
| UCKL1 | Vascular endothelial cell         | GBM | -0.122535449 |
| UCKL1 | Vascular smooth muscle cell       | GBM | -0.170438016 |
| UCKL1 | Vegf_signaling_pathway            | GBM | -0.154114698 |
| UCKL1 | Vitamin b6 metabolism             | GBM | -0.288259421 |
| UCKL1 | Willert_wnt_signaling             | GBM | 0.046105665  |
| UCKL1 | Wnt_beta_catenin_signaling        | GBM | 0.065397361  |
| UPP1  | Abnormal plasma cell              | GBM | 0.078539856  |
| UPP1  | Activated b cell                  | GBM | 0.585996602  |
| UPP1  | Activated cd4+ t cell             | GBM | 0.513107707  |
| UPP1  | Activated t cell                  | GBM | 0.454302696  |
| UPP1  | Alanine, aspartate and glutamate  | GBM | 0.103586108  |
| UPP1  | Alcalal apoptosis                 | GBM | 0.463315388  |
| UPP1  | Alpha-linolenic acid metabolism   | GBM | 0.187412101  |
| UPP1  | Amino sugar and nucleotide        | GBM | 0.614906825  |
| UPP1  | Ampk_pathway                      | GBM | -0.531523701 |
| UPP1  | Angiogenesis                      | GBM | 0.410137509  |
| UPP1  | Arachidonic acid metabolism       | GBM | 0.470968912  |
| UPP1  | Arginine and proline metabolism   | GBM | 0.404232815  |
| UPP1  | Arginine biosynthesis             | GBM | 0.176764664  |
| UPP1  | Ascorbate and aldarate metabolism | GBM | -0.096189695 |
| UPP1  | Atypical memory b cell            | GBM | 0.350270915  |
| UPP1  | Axl+siglec6+ dendritic cell       | GBM | 0.530125442  |
| UPP1  | B cell                            | GBM | 0.527967516  |
| UPP1  | B1 cell                           | GBM | 0.23840182   |
| UPP1  | Basal cell                        | GBM | 0.742995665  |
| UPP1  | Beta-alanine metabolism           | GBM | 0.228033233  |
| UPP1  | Biosynthesis of unsaturated       | GBM | 0.218146752  |
| UPP1  | Biotin metabolism                 | GBM | 0.195337669  |
| UPP1  | Butanoate metabolism              | GBM | -0.056600983 |
| UPP1  | Caffeine metabolism               | GBM | -0.051232529 |
| UPP1  | Cancer stem cell                  | GBM | 0.365769724  |
| UPP1  | Cancer stem-like cell             | GBM | 0.235553216  |
| UPP1  | Cd4+ cytotoxic t cell             | GBM | 0.48600294   |
| UPP1  | Cd4+ memory t cell                | GBM | 0.368494526  |
| UPP1  | Cd4+ regulatory t cell            | GBM | 0.508020118  |
| UPP1  | Cd4+ t helper cell                | GBM | 0.450785651  |
| UPP1  | Cd4+cd25+ regulatory t cell       | GBM | 0.490285146  |
| UPP1  | Cd8+ cytotoxic t cell             | GBM | 0.434470786  |
| UPP1  | Cd8+ regulatory t cell            | GBM | 0.375085365  |

|      |                              |     |              |
|------|------------------------------|-----|--------------|
| UPP1 | Cell_cycle                   | GBM | -0.293500268 |
| UPP1 | Chandran_metastasis_top      | GBM | -0.393764826 |
| UPP1 | Citrate cycle (tca cycle)    | GBM | 0.171701145  |
| UPP1 | Cysteine and methionine r    | GBM | 0.313266374  |
| UPP1 | Cytokine induced killer c    | GBM | 0.204116174  |
| UPP1 | D-arginine and d-ornithin    | GBM | -0.089363585 |
| UPP1 | D-glutamine and d-glutan     | GBM | -0.187271233 |
| UPP1 | Dendritic cell               | GBM | 0.495994181  |
| UPP1 | Dna_repair                   | GBM | 0.224819877  |
| UPP1 | Dna_replication              | GBM | -0.122161065 |
| UPP1 | Double-negative memory       | GBM | 0.258852951  |
| UPP1 | Drug metabolism - cytoch     | GBM | 0.291232594  |
| UPP1 | Drug metabolism - other      | GBM | 0.387535789  |
| UPP1 | E2f_targets                  | GBM | -0.292349987 |
| UPP1 | Ecm_receptor_interaction     | GBM | 0.30128595   |
| UPP1 | Effector cd4+ memory t (     | GBM | 0.401915968  |
| UPP1 | Effector cd8+ memory t (     | GBM | 0.478650447  |
| UPP1 | Effector memory t cell       | GBM | 0.462705556  |
| UPP1 | Effector regulatory t (treg  | GBM | 0.431548385  |
| UPP1 | Elvidge_hif1a_targets_up     | GBM | 0.152708532  |
| UPP1 | Endothelial cell             | GBM | 0.224077654  |
| UPP1 | Eosinophil                   | GBM | 0.529780485  |
| UPP1 | Ether lipid metabolism       | GBM | 0.116920398  |
| UPP1 | Exhausted cd4+ t cell        | GBM | 0.505092681  |
| UPP1 | Exhausted cd8+ t cell        | GBM | 0.543279449  |
| UPP1 | Exhausted t cell             | GBM | 0.420842825  |
| UPP1 | Fat cell (adipocyte)         | GBM | 0.234107568  |
| UPP1 | Fatty acid biosynthesis      | GBM | 0.02230498   |
| UPP1 | Fatty acid degradation       | GBM | 0.133356747  |
| UPP1 | Fatty acid elongation        | GBM | 0.426454839  |
| UPP1 | Fibroblast                   | GBM | 0.376883706  |
| UPP1 | Folate biosynthesis          | GBM | 0.395310706  |
| UPP1 | Follicular b cell            | GBM | 0.325856225  |
| UPP1 | Follicular dendritic cell    | GBM | 0.262730286  |
| UPP1 | Follicular helper (tfh) t ce | GBM | 0.486444374  |
| UPP1 | Follicular t cell            | GBM | 0.237497079  |
| UPP1 | Foxp3+il-17+ t cell          | GBM | 0.146005276  |
| UPP1 | Fructose and mannose me      | GBM | 0.501093169  |
| UPP1 | G2m_checkpoint               | GBM | -0.445776443 |
| UPP1 | Galactose metabolism         | GBM | 0.552565096  |
| UPP1 | Galie_tumor_stemness_ge      | GBM | -0.11506009  |
| UPP1 | Glutathione metabolism       | GBM | 0.529729257  |
| UPP1 | Glycerolipid metabolism      | GBM | 0.077693303  |

|      |                                          |     |              |
|------|------------------------------------------|-----|--------------|
| UPP1 | Glycerophospholipid metabolism           | GBM | 0.207594803  |
| UPP1 | Glycine, serine and threonine metabolism | GBM | 0.248166052  |
| UPP1 | Glycolysis / gluconeogenesis             | GBM | 0.443875964  |
| UPP1 | Glycosaminoglycan biosynthesis           | GBM | 0.347011787  |
| UPP1 | Glycosaminoglycan biosynthesis           | GBM | 0.085414075  |
| UPP1 | Glycosaminoglycan biosynthesis           | GBM | 0.423248093  |
| UPP1 | Glycosaminoglycan degradation            | GBM | 0.509419415  |
| UPP1 | Glycosphingolipid biosynthesis           | GBM | 0.549141867  |
| UPP1 | Glycosphingolipid biosynthesis           | GBM | 0.474721256  |
| UPP1 | Glycosphingolipid biosynthesis           | GBM | -0.013775813 |
| UPP1 | Glycosylphosphatidylinositol signaling   | GBM | 0.42624394   |
| UPP1 | Glyoxylate and dicarboxylate metabolism  | GBM | 0.160107724  |
| UPP1 | Granulocyte                              | GBM | 0.544379338  |
| UPP1 | Hedgehog signaling                       | GBM | -0.181356781 |
| UPP1 | Histidine metabolism                     | GBM | 0.370052562  |
| UPP1 | Hypoxia                                  | GBM | 0.52844006   |
| UPP1 | IL-17 receptor signaling                 | GBM | 0.406094687  |
| UPP1 | IL2 signaling                            | GBM | 0.58699133   |
| UPP1 | IL6 signaling                            | GBM | 0.569578105  |
| UPP1 | Immune checkpoints                       | GBM | 0.509787057  |
| UPP1 | Immune inhibition                        | GBM | 0.514530815  |
| UPP1 | Inositol phosphate metabolism            | GBM | -0.231469448 |
| UPP1 | Interleukin 6 signaling                  | GBM | 0.08579993   |
| UPP1 | Jaeger metastasis up                     | GBM | 0.173329168  |
| UPP1 | Jain nfkb signaling                      | GBM | -0.087854024 |
| UPP1 | Kras signaling up                        | GBM | 0.536877133  |
| UPP1 | Linoleic acid metabolism                 | GBM | 0.107597987  |
| UPP1 | Lipoic acid metabolism                   | GBM | 0.168729288  |
| UPP1 | Lysine degradation                       | GBM | -0.477451741 |
| UPP1 | Lysosome                                 | GBM | 0.541590282  |
| UPP1 | M1 macrophage                            | GBM | 0.546600431  |
| UPP1 | M2 macrophage                            | GBM | 0.560979563  |
| UPP1 | Mannose type o-glycan biosynthesis       | GBM | 0.021947974  |
| UPP1 | Mapk signaling pathway                   | GBM | 0.035839882  |
| UPP1 | Mapk3 erk1 activation                    | GBM | 0.022466381  |
| UPP1 | Marginal zone b cell                     | GBM | 0.441332803  |
| UPP1 | Memory b cell                            | GBM | 0.330823519  |
| UPP1 | Mesenchymal cell                         | GBM | 0.502978797  |
| UPP1 | Mesenchymal stem cell                    | GBM | 0.486208018  |
| UPP1 | Metabolism of xenobiotics                | GBM | 0.339715467  |
| UPP1 | Migrating cancer stem cell               | GBM | 0.52327263   |
| UPP1 | Mitotic spindle                          | GBM | -0.494984022 |
| UPP1 | Monocyte                                 | GBM | 0.628726315  |

|      |                                          |     |              |
|------|------------------------------------------|-----|--------------|
| UPP1 | Mtor_signaling_pathway                   | GBM | -0.290204194 |
| UPP1 | Mtorc1_signaling                         | GBM | 0.503457997  |
| UPP1 | Mucin type o-glycan biosynthesis         | GBM | 0.332236797  |
| UPP1 | Myc_targets_v1                           | GBM | 0.047995152  |
| UPP1 | Myeloid cell                             | GBM | 0.460960804  |
| UPP1 | N-glycan biosynthesis                    | GBM | 0.415438519  |
| UPP1 | Naive b cell                             | GBM | -0.162222337 |
| UPP1 | Naive cd4+ t cell                        | GBM | 0.27775788   |
| UPP1 | Naive cd8+ t cell                        | GBM | 0.026950691  |
| UPP1 | Natural killer cell                      | GBM | 0.509696265  |
| UPP1 | Natural killer t (nkt) cell              | GBM | 0.499575764  |
| UPP1 | Natural regulatory t (treg) cell         | GBM | 0.456762528  |
| UPP1 | Neomycin, kanamycin and spectinomycin    | GBM | 0.460288679  |
| UPP1 | Neutrophil                               | GBM | 0.567973759  |
| UPP1 | Nicotinate and nicotinamide              | GBM | 0.561714893  |
| UPP1 | Nitrogen metabolism                      | GBM | 0.191073778  |
| UPP1 | Nod_like_receptor_signaling              | GBM | 0.494148172  |
| UPP1 | Notch_signaling                          | GBM | 0.038041565  |
| UPP1 | One carbon pool by folate                | GBM | 0.129845146  |
| UPP1 | Other glycan degradation                 | GBM | 0.506978804  |
| UPP1 | Other types of o-glycan biosynthesis     | GBM | 0.118597896  |
| UPP1 | Oxidative phosphorylation                | GBM | 0.348714473  |
| UPP1 | P53_pathway                              | GBM | 0.60226682   |
| UPP1 | P53_signaling_pathway                    | GBM | 0.119405625  |
| UPP1 | Pantothenate and coenzyme a biosynthesis | GBM | 0.313326674  |
| UPP1 | Pentose and glucuronate interconversions | GBM | 0.28479314   |
| UPP1 | Pentose phosphate pathway                | GBM | 0.443587665  |
| UPP1 | Pericyte                                 | GBM | 0.246487094  |
| UPP1 | Phenylalanine metabolism                 | GBM | 0.514825315  |
| UPP1 | Phenylalanine, tyrosine and tryptophan   | GBM | 0.15325551   |
| UPP1 | Phosphonate and phosphite                | GBM | 0.48266468   |
| UPP1 | Pi3k_akt_activation                      | GBM | 0.011921248  |
| UPP1 | Pi3k_akt_mtor_signaling                  | GBM | 0.467113209  |
| UPP1 | Porphyrin and chlorophyll biosynthesis   | GBM | 0.325022353  |
| UPP1 | Primary bile acid biosynthesis           | GBM | 0.44676425   |
| UPP1 | Propanoate metabolism                    | GBM | 0.016208586  |
| UPP1 | Purine metabolism                        | GBM | 0.205261113  |
| UPP1 | Pyrimidine metabolism                    | GBM | 0.18151161   |
| UPP1 | Pyruvate metabolism                      | GBM | 0.118993655  |
| UPP1 | Regulation_of_autophagy                  | GBM | 0.231599176  |
| UPP1 | Retinol metabolism                       | GBM | 0.142961125  |
| UPP1 | Riboflavin metabolism                    | GBM | 0.474565948  |
| UPP1 | Schmahl_pdgf_signaling                   | GBM | 0.159753386  |

|      |                            |     |              |
|------|----------------------------|-----|--------------|
| UPP1 | Selenocompound metabol     | GBM | -0.233153163 |
| UPP1 | Signaling_by_hippo         | GBM | -0.111161743 |
| UPP1 | Sphingolipid metabolism    | GBM | 0.194389026  |
| UPP1 | Starch and sucrose metabo  | GBM | 0.382254551  |
| UPP1 | Steroid biosynthesis       | GBM | 0.026506536  |
| UPP1 | Steroid hormone biosynth   | GBM | 0.300524884  |
| UPP1 | Sulfur metabolism          | GBM | -0.001016805 |
| UPP1 | Synthesis and degradation  | GBM | -0.032356123 |
| UPP1 | T helper cell              | GBM | 0.471838098  |
| UPP1 | T helper1 (th1) cell       | GBM | 0.483175499  |
| UPP1 | T helper17 (th17) cell     | GBM | 0.540801095  |
| UPP1 | T helper2 (th2) cell       | GBM | 0.555461107  |
| UPP1 | T helper9 (th9) cell       | GBM | 0.453622305  |
| UPP1 | Taurine and hypotaurine r  | GBM | -0.250305317 |
| UPP1 | Terpenoid backbone biosy   | GBM | -0.056334001 |
| UPP1 | Tgf_beta_signaling_pathw   | GBM | -0.204326659 |
| UPP1 | Thiamine metabolism        | GBM | 0.315733687  |
| UPP1 | Tnfa_signaling_via_nfbk    | GBM | 0.551196068  |
| UPP1 | Tryptophan metabolism      | GBM | 0.428757432  |
| UPP1 | Tumor endothelial cell     | GBM | 0.216597914  |
| UPP1 | Tyrosine metabolism        | GBM | 0.44860785   |
| UPP1 | Ubiquinone and other ter   | GBM | 0.47138879   |
| UPP1 | Valine, leucine and isoleu | GBM | 0.468210477  |
| UPP1 | Valine, leucine and isoleu | GBM | 0.132059302  |
| UPP1 | Vascular endothelial cell  | GBM | 0.282243685  |
| UPP1 | Vascular smooth muscle c   | GBM | 0.069015683  |
| UPP1 | Vegf_signaling_pathway     | GBM | 0.016738818  |
| UPP1 | Vitamin b6 metabolism      | GBM | 0.149755065  |
| UPP1 | Willert_wnt_signaling      | GBM | 0.18477159   |
| UPP1 | Wnt_beta_catenin_signali   | GBM | -0.373533629 |
| UPP2 | Abnormal plasma cell       | GBM | -0.217772464 |
| UPP2 | Activated b cell           | GBM | 0.036725772  |
| UPP2 | Activated cd4+ t cell      | GBM | 0.036228023  |
| UPP2 | Activated t cell           | GBM | -0.110658598 |
| UPP2 | Alanine, aspartate and glu | GBM | 0.313792157  |
| UPP2 | Alcala_apoptosis           | GBM | -0.065476746 |
| UPP2 | Alpha-linolenic acid meta  | GBM | 0.032315364  |
| UPP2 | Amino sugar and nucleoti   | GBM | -0.181561243 |
| UPP2 | Ampk_pathway               | GBM | -0.150265228 |
| UPP2 | Angiogenesis               | GBM | -0.156567109 |
| UPP2 | Arachidonic acid metabo    | GBM | 0.127140901  |
| UPP2 | Arginine and proline met   | GBM | 0.15992592   |
| UPP2 | Arginine biosynthesis      | GBM | 0.322523118  |

|      |                             |     |              |
|------|-----------------------------|-----|--------------|
| UPP2 | Ascorbate and aldarate me   | GBM | 0.051436818  |
| UPP2 | Atypical memory b cell      | GBM | -0.145042174 |
| UPP2 | Axl+siglec6+ dendritic ce   | GBM | -0.010068601 |
| UPP2 | B cell                      | GBM | 0.018449987  |
| UPP2 | B1 cell                     | GBM | -0.058447783 |
| UPP2 | Basal cell                  | GBM | -0.139473419 |
| UPP2 | Beta-alanine metabolism     | GBM | 0.22232965   |
| UPP2 | Biosynthesis of unsaturate  | GBM | -0.002409625 |
| UPP2 | Biotin metabolism           | GBM | 0.023070335  |
| UPP2 | Butanoate metabolism        | GBM | 0.251992068  |
| UPP2 | Caffeine metabolism         | GBM | 0.157736061  |
| UPP2 | Cancer stem cell            | GBM | -0.23198783  |
| UPP2 | Cancer stem-like cell       | GBM | -0.158646786 |
| UPP2 | Cd4+ cytotoxic t cell       | GBM | 0.016312867  |
| UPP2 | Cd4+ memory t cell          | GBM | -0.182875023 |
| UPP2 | Cd4+ regulatory t cell      | GBM | -0.038313963 |
| UPP2 | Cd4+ t helper cell          | GBM | 0.027009542  |
| UPP2 | Cd4+cd25+ regulatory t c    | GBM | 0.000350481  |
| UPP2 | Cd8+ cytotoxic t cell       | GBM | -0.057318047 |
| UPP2 | Cd8+ regulatory t cell      | GBM | -0.038730648 |
| UPP2 | Cell_cycle                  | GBM | -0.345796271 |
| UPP2 | Chandran_metastasis_top5    | GBM | -0.188607421 |
| UPP2 | Citrate cycle (tca cycle)   | GBM | 0.014584679  |
| UPP2 | Cysteine and methionine r   | GBM | 0.075256207  |
| UPP2 | Cytokine induced killer c   | GBM | -0.050610067 |
| UPP2 | D-arginine and d-ornithin   | GBM | 0.226897646  |
| UPP2 | D-glutamine and d-glutan    | GBM | 0.454430712  |
| UPP2 | Dendritic cell              | GBM | -0.035791139 |
| UPP2 | Dna_repair                  | GBM | -0.236081369 |
| UPP2 | Dna_replication             | GBM | -0.374805321 |
| UPP2 | Double-negative memory      | GBM | -0.12658282  |
| UPP2 | Drug metabolism - cytoch    | GBM | 0.166619101  |
| UPP2 | Drug metabolism - other     | GBM | 0.044387897  |
| UPP2 | E2f_targets                 | GBM | -0.361873768 |
| UPP2 | Ecm_receptor_interaction    | GBM | -0.243612333 |
| UPP2 | Effector cd4+ memory t (    | GBM | 0.03908319   |
| UPP2 | Effector cd8+ memory t (    | GBM | 0.002812496  |
| UPP2 | Effector memory t cell      | GBM | -0.002969395 |
| UPP2 | Effector regulatory t (treg | GBM | -0.106796581 |
| UPP2 | Elvidge_hif1a_targets_up    | GBM | -0.200717139 |
| UPP2 | Endothelial cell            | GBM | -0.27215141  |
| UPP2 | Eosinophil                  | GBM | 0.061493574  |
| UPP2 | Ether lipid metabolism      | GBM | 0.169909643  |

|      |                              |     |              |
|------|------------------------------|-----|--------------|
| UPP2 | Exhausted cd4+ t cell        | GBM | -0.006716943 |
| UPP2 | Exhausted cd8+ t cell        | GBM | -0.043949446 |
| UPP2 | Exhausted t cell             | GBM | -0.024840436 |
| UPP2 | Fat cell (adipocyte)         | GBM | 0.051277509  |
| UPP2 | Fatty acid biosynthesis      | GBM | 0.178401345  |
| UPP2 | Fatty acid degradation       | GBM | 0.21405005   |
| UPP2 | Fatty acid elongation        | GBM | 0.073233008  |
| UPP2 | Fibroblast                   | GBM | -0.170597946 |
| UPP2 | Folate biosynthesis          | GBM | 0.090744352  |
| UPP2 | Follicular b cell            | GBM | 0.029399189  |
| UPP2 | Follicular dendritic cell    | GBM | -0.051120244 |
| UPP2 | Follicular helper (tfh) t ce | GBM | -0.069778412 |
| UPP2 | Follicular t cell            | GBM | -0.112203857 |
| UPP2 | Foxp3+il-17+ t cell          | GBM | -0.270611043 |
| UPP2 | Fructose and mannose me      | GBM | -0.204140273 |
| UPP2 | G2m_checkpoint               | GBM | -0.383649461 |
| UPP2 | Galactose metabolism         | GBM | -0.21767572  |
| UPP2 | Galie_tumor_stemness_ge      | GBM | -0.265504706 |
| UPP2 | Glutathione metabolism       | GBM | -0.050897285 |
| UPP2 | Glycerolipid metabolism      | GBM | -0.050168066 |
| UPP2 | Glycerophospholipid metæ     | GBM | 0.075454758  |
| UPP2 | Glycine, serine and threor   | GBM | 0.058898194  |
| UPP2 | Glycolysis / gluconeogene    | GBM | -0.064016115 |
| UPP2 | Glycosaminoglycan biosy1     | GBM | -0.388570305 |
| UPP2 | Glycosaminoglycan biosy1     | GBM | -0.275731961 |
| UPP2 | Glycosaminoglycan biosy1     | GBM | -0.199596568 |
| UPP2 | Glycosaminoglycan degra      | GBM | -0.164796673 |
| UPP2 | Glycosphingolipid biosyn1    | GBM | -0.04525713  |
| UPP2 | Glycosphingolipid biosyn1    | GBM | -0.045215606 |
| UPP2 | Glycosphingolipid biosyn1    | GBM | -0.042264272 |
| UPP2 | Glycosylphosphatidylinos:    | GBM | 0.056944639  |
| UPP2 | Glyoxylate and dicarboxy     | GBM | 0.138463515  |
| UPP2 | Granulocyte                  | GBM | -0.029213649 |
| UPP2 | Hedgehog_signaling           | GBM | -0.151673681 |
| UPP2 | Histidine metabolism         | GBM | 0.268805147  |
| UPP2 | Hypoxia                      | GBM | -0.133709916 |
| UPP2 | Il-17ralpha t cell           | GBM | -0.114678041 |
| UPP2 | Il2_stat5_signaling          | GBM | -0.113830905 |
| UPP2 | Il6_jak_stat3_signaling      | GBM | -0.085429332 |
| UPP2 | Immune_checkpoints_tunr      | GBM | -0.095474968 |
| UPP2 | Immune_inhibition_cytok      | GBM | 0.022414235  |
| UPP2 | Inositol phosphate metabo    | GBM | 0.062844609  |
| UPP2 | Interleukin_6_signaling      | GBM | -0.1536341   |



|      |                             |     |              |
|------|-----------------------------|-----|--------------|
| UPP2 | Jaeger_metastasis_up        | GBM | -0.284008475 |
| UPP2 | Jain_nfkb_signaling         | GBM | -0.317136343 |
| UPP2 | Kras_signaling_up           | GBM | 0.028233803  |
| UPP2 | Linoleic acid metabolism    | GBM | 0.165991409  |
| UPP2 | Lipoic acid metabolism      | GBM | 0.167058903  |
| UPP2 | Lysine degradation          | GBM | -0.241463356 |
| UPP2 | Lysosome                    | GBM | -0.077395298 |
| UPP2 | M1 macrophage               | GBM | 0.03054054   |
| UPP2 | M2 macrophage               | GBM | -0.009733958 |
| UPP2 | Mannose type o-glycan bi    | GBM | -0.186050551 |
| UPP2 | Mapk_signaling_pathway      | GBM | 0.038647921  |
| UPP2 | Mapk3_erk1_activation       | GBM | -0.002858797 |
| UPP2 | Marginal zone b cell        | GBM | 0.043061061  |
| UPP2 | Memory b cell               | GBM | 0.043592328  |
| UPP2 | Mesenchymal cell            | GBM | -0.235953459 |
| UPP2 | Mesenchymal stem cell       | GBM | -0.116491138 |
| UPP2 | Metabolism of xenobiotic    | GBM | 0.131980195  |
| UPP2 | Migrating cancer stem cel   | GBM | -0.118342575 |
| UPP2 | Mitotic_spindle             | GBM | -0.247319871 |
| UPP2 | Monocyte                    | GBM | 0.008569426  |
| UPP2 | Mtor_signaling_pathway      | GBM | -0.057314902 |
| UPP2 | Mtorc1_signaling            | GBM | -0.229449959 |
| UPP2 | Mucin type o-glycan biosy   | GBM | -0.075564295 |
| UPP2 | Myc_targets_v1              | GBM | -0.192676668 |
| UPP2 | Myeloid cell                | GBM | 0.006881689  |
| UPP2 | N-glycan biosynthesis       | GBM | -0.351863317 |
| UPP2 | Naive b cell                | GBM | 0.10755859   |
| UPP2 | Naive cd4+ t cell           | GBM | 0.077778647  |
| UPP2 | Naive cd8+ t cell           | GBM | 0.178899481  |
| UPP2 | Natural killer cell         | GBM | -0.002497735 |
| UPP2 | Natural killer t (nkt) cell | GBM | -0.154444724 |
| UPP2 | Natural regulatory t (treg) | GBM | -0.044629513 |
| UPP2 | Neomycin, kanamycin an      | GBM | -0.121869483 |
| UPP2 | Neutrophil                  | GBM | 0.002486001  |
| UPP2 | Nicotinate and nicotinami   | GBM | 0.143336706  |
| UPP2 | Nitrogen metabolism         | GBM | 0.163922189  |
| UPP2 | Nod_like_receptor_signal    | GBM | -0.011134286 |
| UPP2 | Notch_signaling             | GBM | -0.319197415 |
| UPP2 | One carbon pool by folate   | GBM | -0.373626916 |
| UPP2 | Other glycan degradation    | GBM | -0.115143398 |
| UPP2 | Other types of o-glycan b   | GBM | -0.302866685 |
| UPP2 | Oxidative phosphorylatio    | GBM | 0.177291342  |
| UPP2 | P53_pathway                 | GBM | -0.05799352  |

|      |                            |     |              |
|------|----------------------------|-----|--------------|
| UPP2 | P53_signaling_pathway      | GBM | -0.264623169 |
| UPP2 | Pantothenate and coa bios  | GBM | 0.091629825  |
| UPP2 | Pentose and glucuronate i  | GBM | -0.095613379 |
| UPP2 | Pentose phosphate pathwa   | GBM | -0.135908353 |
| UPP2 | Pericyte                   | GBM | -0.1816613   |
| UPP2 | Phenylalanine metabolism   | GBM | 0.0585828    |
| UPP2 | Phenylalanine, tyrosine ar | GBM | 0.330251962  |
| UPP2 | Phosphonate and phosphir   | GBM | 0.078935337  |
| UPP2 | Pi3k_akt_activation        | GBM | 0.013071539  |
| UPP2 | Pi3k_akt_mtor_signaling    | GBM | -0.175991903 |
| UPP2 | Porphyrin and chlorophyl   | GBM | -0.018573119 |
| UPP2 | Primary bile acid biosynt  | GBM | 0.250236278  |
| UPP2 | Propanoate metabolism      | GBM | 0.236594422  |
| UPP2 | Purine metabolism          | GBM | -0.128125799 |
| UPP2 | Pyrimidine metabolism      | GBM | -0.204518927 |
| UPP2 | Pyruvate metabolism        | GBM | 0.214636567  |
| UPP2 | Regulation_of_autophagy    | GBM | 0.304840039  |
| UPP2 | Retinol metabolism         | GBM | 0.207429896  |
| UPP2 | Riboflavin metabolism      | GBM | 0.045604437  |
| UPP2 | Schmahl_pdgf_signaling     | GBM | 0.058537265  |
| UPP2 | Selenocompound metabol     | GBM | -0.087390939 |
| UPP2 | Signaling_by_hippo         | GBM | -0.08884803  |
| UPP2 | Sphingolipid metabolism    | GBM | 0.032917214  |
| UPP2 | Starch and sucrose metabo  | GBM | 0.05646138   |
| UPP2 | Steroid biosynthesis       | GBM | -0.15763794  |
| UPP2 | Steroid hormone biosynth   | GBM | 0.241296343  |
| UPP2 | Sulfur metabolism          | GBM | -0.049752168 |
| UPP2 | Synthesis and degradation  | GBM | 0.19757396   |
| UPP2 | T helper cell              | GBM | 0.049910607  |
| UPP2 | T helper1 (th1) cell       | GBM | 0.025526701  |
| UPP2 | T helper17 (th17) cell     | GBM | -0.035849485 |
| UPP2 | T helper2 (th2) cell       | GBM | -0.073183178 |
| UPP2 | T helper9 (th9) cell       | GBM | -0.070179139 |
| UPP2 | Taurine and hypotaurine r  | GBM | 0.142729546  |
| UPP2 | Terpenoid backbone biosy   | GBM | -0.131101975 |
| UPP2 | Tgf_beta_signaling_pathw   | GBM | -0.165604386 |
| UPP2 | Thiamine metabolism        | GBM | 0.218200318  |
| UPP2 | Tnfa_signaling_via_nfk     | GBM | -0.12663673  |
| UPP2 | Tryptophan metabolism      | GBM | 0.132505217  |
| UPP2 | Tumor endothelial cell     | GBM | -0.040039712 |
| UPP2 | Tyrosine metabolism        | GBM | 0.248301444  |
| UPP2 | Ubiquinone and other ter   | GBM | 0.065502352  |
| UPP2 | Valine, leucine and isoleu | GBM | -0.151435433 |

|      |                            |      |              |
|------|----------------------------|------|--------------|
| UPP2 | Valine, leucine and isoleu | GBM  | 0.176111931  |
| UPP2 | Vascular endothelial cell  | GBM  | -0.184347072 |
| UPP2 | Vascular smooth muscle c   | GBM  | -0.097552303 |
| UPP2 | Vegf_signaling_pathway     | GBM  | -0.108396901 |
| UPP2 | Vitamin b6 metabolism      | GBM  | 0.318313406  |
| UPP2 | Willert_wnt_signaling      | GBM  | -0.072524432 |
| UPP2 | Wnt_beta_catenin_signali   | GBM  | -0.346702762 |
| CDA  | Abnormal plasma cell       | HNSC | 0.079646997  |
| CDA  | Activated b cell           | HNSC | -0.157818209 |
| CDA  | Activated cd4+ t cell      | HNSC | -0.157052535 |
| CDA  | Activated t cell           | HNSC | -0.187382367 |
| CDA  | Alanine, aspartate and glu | HNSC | -0.174779873 |
| CDA  | Alcala_apoptosis           | HNSC | 0.091073253  |
| CDA  | Alpha-linolenic acid meta  | HNSC | 0.317723226  |
| CDA  | Amino sugar and nucleoti   | HNSC | 0.357658938  |
| CDA  | Ampk_pathway               | HNSC | -0.008209772 |
| CDA  | Angiogenesis               | HNSC | 0.30995359   |
| CDA  | Arachidonic acid metabol   | HNSC | 0.193973302  |
| CDA  | Arginine and proline met   | HNSC | 0.290351072  |
| CDA  | Arginine biosynthesis      | HNSC | 0.093836105  |
| CDA  | Ascorbate and aldarate m   | HNSC | -0.204439794 |
| CDA  | Atypical memory b cell     | HNSC | -0.164594999 |
| CDA  | Axl+siglec6+ dendritic ce  | HNSC | -0.095228917 |
| CDA  | B cell                     | HNSC | -0.284942959 |
| CDA  | B1 cell                    | HNSC | -0.175530291 |
| CDA  | Basal cell                 | HNSC | 0.443476324  |
| CDA  | Beta-alanine metabolism    | HNSC | 0.143678152  |
| CDA  | Biosynthesis of unsaturate | HNSC | 0.125029238  |
| CDA  | Biotin metabolism          | HNSC | -0.236643851 |
| CDA  | Butanoate metabolism       | HNSC | -0.094377909 |
| CDA  | Caffeine metabolism        | HNSC | 0.047147846  |
| CDA  | Cancer stem cell           | HNSC | -0.055951746 |
| CDA  | Cancer stem-like cell      | HNSC | -0.308811296 |
| CDA  | Cd4+ cytotoxic t cell      | HNSC | 0.020007721  |
| CDA  | Cd4+ memory t cell         | HNSC | -0.106718746 |
| CDA  | Cd4+ regulatory t cell     | HNSC | -0.132246343 |
| CDA  | Cd4+ t helper cell         | HNSC | -0.161887388 |
| CDA  | Cd4+cd25+ regulatory t c   | HNSC | -0.154750059 |
| CDA  | Cd8+ cytotoxic t cell      | HNSC | -0.094493438 |
| CDA  | Cd8+ regulatory t cell     | HNSC | -0.127896908 |
| CDA  | Cell_cycle                 | HNSC | -0.318550446 |
| CDA  | Chandran_metastasis_top    | HNSC | -0.157143699 |
| CDA  | Citrate cycle (tca cycle)  | HNSC | 0.12674591   |

|     |                             |      |              |
|-----|-----------------------------|------|--------------|
| CDA | Cysteine and methionine r   | HNSC | -0.228057399 |
| CDA | Cytokine induced killer c   | HNSC | -0.06481717  |
| CDA | D-arginine and d-ornithin   | HNSC | -0.027721552 |
| CDA | D-glutamine and d-glutan    | HNSC | -0.181668836 |
| CDA | Dendritic cell              | HNSC | -0.006356311 |
| CDA | Dna_repair                  | HNSC | -0.058526125 |
| CDA | Dna_replication             | HNSC | -0.365905161 |
| CDA | Double-negative memory      | HNSC | -0.220457526 |
| CDA | Drug metabolism - cytoch    | HNSC | -0.118942987 |
| CDA | Drug metabolism - other c   | HNSC | 0.090084899  |
| CDA | E2f_targets                 | HNSC | -0.356853734 |
| CDA | Ecm_receptor_interaction    | HNSC | 0.248837401  |
| CDA | Effector cd4+ memory t (    | HNSC | -0.16866954  |
| CDA | Effector cd8+ memory t (    | HNSC | 0.074993228  |
| CDA | Effector memory t cell      | HNSC | -0.149664787 |
| CDA | Effector regulatory t (treg | HNSC | -0.127586637 |
| CDA | Elvidge_hif1a_targets_up    | HNSC | 0.152847671  |
| CDA | Endothelial cell            | HNSC | -0.104993171 |
| CDA | Eosinophil                  | HNSC | -0.07503318  |
| CDA | Ether lipid metabolism      | HNSC | 0.311531917  |
| CDA | Exhausted cd4+ t cell       | HNSC | -0.033944963 |
| CDA | Exhausted cd8+ t cell       | HNSC | -0.031680471 |
| CDA | Exhausted t cell            | HNSC | -0.138872279 |
| CDA | Fat cell (adipocyte)        | HNSC | 0.068531575  |
| CDA | Fatty acid biosynthesis     | HNSC | 0.146905502  |
| CDA | Fatty acid degradation      | HNSC | -0.079233427 |
| CDA | Fatty acid elongation       | HNSC | 0.326597561  |
| CDA | Fibroblast                  | HNSC | 0.137554089  |
| CDA | Folate biosynthesis         | HNSC | 0.164009947  |
| CDA | Follicular b cell           | HNSC | -0.198975705 |
| CDA | Follicular dendritic cell   | HNSC | -0.195074649 |
| CDA | Follicular helper (tfh) t c | HNSC | -0.079563568 |
| CDA | Follicular t cell           | HNSC | -0.138767775 |
| CDA | Foxp3+il-17+ t cell         | HNSC | -0.117413204 |
| CDA | Fructose and mannose me     | HNSC | 0.318643064  |
| CDA | G2m_checkpoint              | HNSC | -0.25690342  |
| CDA | Galactose metabolism        | HNSC | 0.32242166   |
| CDA | Galie_tumor_stemness_ge     | HNSC | 0.224749721  |
| CDA | Glutathione metabolism      | HNSC | -0.056743857 |
| CDA | Glycerolipid metabolism     | HNSC | 0.209072547  |
| CDA | Glycerophospholipid met     | HNSC | 0.151930709  |
| CDA | Glycine, serine and threor  | HNSC | 0.023658104  |
| CDA | Glycolysis / gluconeogene   | HNSC | 0.15914911   |

|     |                           |      |              |
|-----|---------------------------|------|--------------|
| CDA | Glycosaminoglycan biosyn  | HNSC | 0.188668964  |
| CDA | Glycosaminoglycan biosyn  | HNSC | 0.172814704  |
| CDA | Glycosaminoglycan biosyn  | HNSC | -0.020131219 |
| CDA | Glycosaminoglycan degra   | HNSC | 0.133863251  |
| CDA | Glycosphingolipid biosyn  | HNSC | 0.06723152   |
| CDA | Glycosphingolipid biosyn  | HNSC | -0.105192173 |
| CDA | Glycosphingolipid biosyn  | HNSC | -0.067440693 |
| CDA | Glycosylphosphatidylinos  | HNSC | -0.078930564 |
| CDA | Glyoxylate and dicarboxy  | HNSC | -0.145362459 |
| CDA | Granulocyte               | HNSC | -0.017710996 |
| CDA | Hedgehog_signaling        | HNSC | 0.062802848  |
| CDA | Histidine metabolism      | HNSC | 0.134565379  |
| CDA | Hypoxia                   | HNSC | 0.406182689  |
| CDA | Il-17alpha t cell         | HNSC | -0.080484367 |
| CDA | Il2_stat5_signaling       | HNSC | 0.171811135  |
| CDA | Il6_jak_stat3_signaling   | HNSC | 0.195033658  |
| CDA | Immune_checkpoints_tun    | HNSC | 0.091405142  |
| CDA | Immune_inhibition_cytok   | HNSC | 0.229397689  |
| CDA | Inositol phosphate metabo | HNSC | 0.023962873  |
| CDA | Interleukin_6_signaling   | HNSC | 0.044390174  |
| CDA | Jaeger_metastasis_up      | HNSC | -0.252666364 |
| CDA | Jain_nfkb_signaling       | HNSC | 0.042777201  |
| CDA | Kras_signaling_up         | HNSC | 0.285574296  |
| CDA | Linoleic acid metabolism  | HNSC | 0.179821875  |
| CDA | Lipoic acid metabolism    | HNSC | -0.207549741 |
| CDA | Lysine degradation        | HNSC | -0.441159466 |
| CDA | Lysosome                  | HNSC | 0.244532915  |
| CDA | M1 macrophage             | HNSC | 0.035846496  |
| CDA | M2 macrophage             | HNSC | 0.141955177  |
| CDA | Mannose type o-glycan bi  | HNSC | -0.099434468 |
| CDA | Mapk_signaling_pathway    | HNSC | 0.173927563  |
| CDA | Mapk3_erk1_activation     | HNSC | 0.068033865  |
| CDA | Marginal zone b cell      | HNSC | -0.223934565 |
| CDA | Memory b cell             | HNSC | -0.21967472  |
| CDA | Mesenchymal cell          | HNSC | 0.192510003  |
| CDA | Mesenchymal stem cell     | HNSC | -0.038290313 |
| CDA | Metabolism of xenobiotic  | HNSC | -0.119257977 |
| CDA | Migrating cancer stem cel | HNSC | 0.286583912  |
| CDA | Mitotic_spindle           | HNSC | -0.056387224 |
| CDA | Monocyte                  | HNSC | 0.182357492  |
| CDA | Mtor_signaling_pathway    | HNSC | 0.272947534  |
| CDA | Mtorc1_signaling          | HNSC | 0.219370708  |
| CDA | Mucin type o-glycan bios  | HNSC | 0.16423239   |

|     |                             |      |              |
|-----|-----------------------------|------|--------------|
| CDA | Myc_targets_v1              | HNSC | 0.043855667  |
| CDA | Myeloid cell                | HNSC | -0.075898679 |
| CDA | N-glycan biosynthesis       | HNSC | -0.002708403 |
| CDA | Naive b cell                | HNSC | -0.100597403 |
| CDA | Naive cd4+ t cell           | HNSC | -0.058289518 |
| CDA | Naive cd8+ t cell           | HNSC | -0.159820639 |
| CDA | Natural killer cell         | HNSC | -0.066801082 |
| CDA | Natural killer t (nkt) cell | HNSC | -0.25919096  |
| CDA | Natural regulatory t (treg) | HNSC | -0.16653063  |
| CDA | Neomycin, kanamycin and     | HNSC | 0.236202484  |
| CDA | Neutrophil                  | HNSC | 0.36621394   |
| CDA | Nicotinate and nicotinami   | HNSC | 0.19438983   |
| CDA | Nitrogen metabolism         | HNSC | 0.237856414  |
| CDA | Nod_like_receptor_signal    | HNSC | 0.358235642  |
| CDA | Notch_signaling             | HNSC | 0.338553041  |
| CDA | One carbon pool by folate   | HNSC | -0.203036587 |
| CDA | Other glycan degradation    | HNSC | 0.096131445  |
| CDA | Other types of o-glycan b   | HNSC | -0.077489122 |
| CDA | Oxidative phosphorylatio    | HNSC | 0.122255205  |
| CDA | P53_pathway                 | HNSC | 0.389183433  |
| CDA | P53_signaling_pathway       | HNSC | -0.190101557 |
| CDA | Pantothenate and coa bios   | HNSC | 0.064482871  |
| CDA | Pentose and glucuronate i   | HNSC | -0.128795626 |
| CDA | Pentose phosphate pathwa    | HNSC | 0.062299951  |
| CDA | Pericyte                    | HNSC | 0.137120443  |
| CDA | Phenylalanine metabolism    | HNSC | 0.099413056  |
| CDA | Phenylalanine, tyrosine ar  | HNSC | -0.051481268 |
| CDA | Phosphonate and phosphir    | HNSC | -0.084130987 |
| CDA | Pi3k_akt_activation         | HNSC | 0.187381242  |
| CDA | Pi3k_akt_mtor_signaling     | HNSC | 0.26494344   |
| CDA | Porphyrin and chlorophyl    | HNSC | -0.091776525 |
| CDA | Primary bile acid biosynt   | HNSC | 0.2510289    |
| CDA | Propanoate metabolism       | HNSC | -0.15973812  |
| CDA | Purine metabolism           | HNSC | -0.016795959 |
| CDA | Pyrimidine metabolism       | HNSC | -0.025677195 |
| CDA | Pyruvate metabolism         | HNSC | -0.017188302 |
| CDA | Regulation_of_autophagy     | HNSC | 0.035208779  |
| CDA | Retinol metabolism          | HNSC | 0.09235989   |
| CDA | Riboflavin metabolism       | HNSC | 0.00720335   |
| CDA | Schmahl_pdgf_signaling      | HNSC | 0.068877016  |
| CDA | Selenocompound metabol      | HNSC | -0.422605018 |
| CDA | Signaling_by_hippo          | HNSC | 0.17776642   |
| CDA | Sphingolipid metabolism     | HNSC | 0.382472609  |

|      |                            |      |              |
|------|----------------------------|------|--------------|
| CDA  | Starch and sucrose metabo  | HNSC | 0.250931041  |
| CDA  | Steroid biosynthesis       | HNSC | 0.146451412  |
| CDA  | Steroid hormone biosynth   | HNSC | 0.019581101  |
| CDA  | Sulfur metabolism          | HNSC | 0.049755982  |
| CDA  | Synthesis and degradation  | HNSC | 0.100827589  |
| CDA  | T helper cell              | HNSC | -0.082637874 |
| CDA  | T helper1 (th1) cell       | HNSC | 0.029265727  |
| CDA  | T helper17 (th17) cell     | HNSC | 0.099416426  |
| CDA  | T helper2 (th2) cell       | HNSC | -0.029383202 |
| CDA  | T helper9 (th9) cell       | HNSC | -0.113961556 |
| CDA  | Taurine and hypotaurine r  | HNSC | -0.133743424 |
| CDA  | Terpenoid backbone biosy   | HNSC | 0.322706607  |
| CDA  | Tgf_beta_signaling_pathw   | HNSC | 0.188846364  |
| CDA  | Thiamine metabolism        | HNSC | 0.194687056  |
| CDA  | Tnfa_signaling_via_nfkB    | HNSC | 0.33576438   |
| CDA  | Tryptophan metabolism      | HNSC | -0.215710721 |
| CDA  | Tumor endothelial cell     | HNSC | 0.577749021  |
| CDA  | Tyrosine metabolism        | HNSC | 0.119727911  |
| CDA  | Ubiquinone and other terp  | HNSC | -0.029644277 |
| CDA  | Valine, leucine and isoleu | HNSC | -0.108940461 |
| CDA  | Valine, leucine and isoleu | HNSC | -0.189438052 |
| CDA  | Vascular endothelial cell  | HNSC | -0.02275607  |
| CDA  | Vascular smooth muscle c   | HNSC | -0.024997882 |
| CDA  | Vegf_signaling_pathway     | HNSC | 0.310750929  |
| CDA  | Vitamin b6 metabolism      | HNSC | -0.226744038 |
| CDA  | Willert_wnt_signaling      | HNSC | 0.370995752  |
| CDA  | Wnt_beta_catenin_signali   | HNSC | -0.028755805 |
| UCK1 | Abnormal plasma cell       | HNSC | -0.075551925 |
| UCK1 | Activated b cell           | HNSC | 0.098070223  |
| UCK1 | Activated cd4+ t cell      | HNSC | 0.051324861  |
| UCK1 | Activated t cell           | HNSC | 0.144955302  |
| UCK1 | Alanine, aspartate and glu | HNSC | -0.089436175 |
| UCK1 | Alcala_apoptosis           | HNSC | 0.158515012  |
| UCK1 | Alpha-linolenic acid meta  | HNSC | -0.15009871  |
| UCK1 | Amino sugar and nucleoti   | HNSC | -0.081892269 |
| UCK1 | Ampk_pathway               | HNSC | -0.006161521 |
| UCK1 | Angiogenesis               | HNSC | -0.232724877 |
| UCK1 | Arachidonic acid metabol   | HNSC | 0.004511622  |
| UCK1 | Arginine and proline metε  | HNSC | -0.130324811 |
| UCK1 | Arginine biosynthesis      | HNSC | -0.174312587 |
| UCK1 | Ascorbate and aldarate mε  | HNSC | -0.08271856  |
| UCK1 | Atypical memory b cell     | HNSC | 0.095122145  |
| UCK1 | Axl+siglec6+ dendritic ce  | HNSC | -0.020820457 |

|      |                             |       |              |
|------|-----------------------------|-------|--------------|
| UCK1 | B cell                      | HNSC  | 0.140155028  |
| UCK1 | B1 cell                     | HNSC  | 0.038675159  |
| UCK1 | Basal cell                  | HNSC  | -0.21869456  |
| UCK1 | Beta-alanine metabolism     | HNSC  | -0.068969183 |
| UCK1 | Biosynthesis of unsaturate  | HNSC  | -0.061212921 |
| UCK1 | Biotin metabolism           | HNSC  | 0.191772255  |
| UCK1 | Butanoate metabolism        | HNSC  | 0.198829851  |
| UCK1 | Caffeine metabolism         | HNSC  | -0.079523498 |
| UCK1 | Cancer stem cell            | HNSC  | -0.193176812 |
| UCK1 | Cancer stem-like cell       | HNSC  | 0.040723244  |
| UCK1 | Cd4+ cytotoxic t cell       | HNSC  | 0.088983607  |
| UCK1 | Cd4+ memory t cell          | HNSC  | 0.00659644   |
| UCK1 | Cd4+ regulatory t cell      | HNSC  | 0.029658009  |
| UCK1 | Cd4+ t helper cell          | HNSC  | 0.110966545  |
| UCK1 | Cd4+cd25+ regulatory t c    | HNSC  | 0.098629045  |
| UCK1 | Cd8+ cytotoxic t cell       | HNSC  | 0.172726118  |
| UCK1 | Cd8+ regulatory t cell      | HNSC  | 0.100717415  |
| UCK1 | Cell_cycle                  | HNSC  | -0.023961225 |
| UCK1 | Chandran_metastasis_top     | HNSC  | -0.258163783 |
| UCK1 | Citrate cycle (tca cycle)   | HNSC  | -0.068094395 |
| UCK1 | Cysteine and methionine r   | HNSC  | 0.030063     |
| UCK1 | Cytokine induced killer c   | HNSC  | 0.157369129  |
| UCK1 | D-arginine and d-ornithin   | HNSC  | 0.064347259  |
| UCK1 | D-glutamine and d-glutan    | HNSC  | -0.219773729 |
| UCK1 | Dendritic cell              | HNSC  | 0.021536075  |
| UCK1 | Dna_repair                  | HNSC  | 0.38061521   |
| UCK1 | Dna_replication             | HNSC  | 0.337505467  |
| UCK1 | Double-negative memory      | HNSC  | 0.219381971  |
| UCK1 | Drug metabolism - cytoch    | HNSC  | -0.04971091  |
| UCK1 | Drug metabolism - other     | HNSC  | 0.100603827  |
| UCK1 | E2f_targets                 | HNSC  | 0.120990285  |
| UCK1 | Ecm_receptor_interaction    | HNSC  | -0.293358785 |
| UCK1 | Effector cd4+ memory t      | (HNSC | -0.011528682 |
| UCK1 | Effector cd8+ memory t      | (HNSC | -0.018944188 |
| UCK1 | Effector memory t cell      | HNSC  | 0.033648537  |
| UCK1 | Effector regulatory t (treg | HNSC  | -5.11E-05    |
| UCK1 | Elvidge_hif1a_targets_up    | HNSC  | -0.338651331 |
| UCK1 | Endothelial cell            | HNSC  | -0.052759163 |
| UCK1 | Eosinophil                  | HNSC  | 0.042355362  |
| UCK1 | Ether lipid metabolism      | HNSC  | -0.235264861 |
| UCK1 | Exhausted cd4+ t cell       | HNSC  | 0.0010058    |
| UCK1 | Exhausted cd8+ t cell       | HNSC  | 0.013770273  |
| UCK1 | Exhausted t cell            | HNSC  | 0.169685571  |



|      |                                |      |              |
|------|--------------------------------|------|--------------|
| UCK1 | Fat cell (adipocyte)           | HNSC | 0.199814437  |
| UCK1 | Fatty acid biosynthesis        | HNSC | -0.152449447 |
| UCK1 | Fatty acid degradation         | HNSC | 0.014431483  |
| UCK1 | Fatty acid elongation          | HNSC | -0.024090156 |
| UCK1 | Fibroblast                     | HNSC | -0.182716763 |
| UCK1 | Folate biosynthesis            | HNSC | 0.080153385  |
| UCK1 | Follicular b cell              | HNSC | 0.054032955  |
| UCK1 | Follicular dendritic cell      | HNSC | 0.024322234  |
| UCK1 | Follicular helper (tfh) t cell | HNSC | 0.021429589  |
| UCK1 | Follicular t cell              | HNSC | 0.221747298  |
| UCK1 | Foxp3+il-17+ t cell            | HNSC | -0.055018633 |
| UCK1 | Fructose and mannose me        | HNSC | -0.023847398 |
| UCK1 | G2m_checkpoint                 | HNSC | -0.117156452 |
| UCK1 | Galactose metabolism           | HNSC | -0.048465175 |
| UCK1 | Galie_tumor_stemness_ge        | HNSC | -0.27205777  |
| UCK1 | Glutathione metabolism         | HNSC | 0.052223092  |
| UCK1 | Glycerolipid metabolism        | HNSC | -0.073868212 |
| UCK1 | Glycerophospholipid met        | HNSC | 0.034813562  |
| UCK1 | Glycine, serine and threo      | HNSC | 0.157548068  |
| UCK1 | Glycolysis / gluconeogene      | HNSC | -0.094464007 |
| UCK1 | Glycosaminoglycan biosy        | HNSC | -0.027996965 |
| UCK1 | Glycosaminoglycan biosy        | HNSC | -0.036731681 |
| UCK1 | Glycosaminoglycan biosy        | HNSC | -0.063637726 |
| UCK1 | Glycosaminoglycan degra        | HNSC | -0.056855081 |
| UCK1 | Glycosphingolipid biosyn       | HNSC | 0.088127686  |
| UCK1 | Glycosphingolipid biosyn       | HNSC | 0.120049261  |
| UCK1 | Glycosphingolipid biosyn       | HNSC | -0.036247606 |
| UCK1 | Glycosylphosphatidylinos       | HNSC | 0.184369558  |
| UCK1 | Glyoxylate and dicarboxy       | HNSC | 0.249839955  |
| UCK1 | Granulocyte                    | HNSC | 0.022433741  |
| UCK1 | Hedgehog_signaling             | HNSC | -0.3502692   |
| UCK1 | Histidine metabolism           | HNSC | -0.086625483 |
| UCK1 | Hypoxia                        | HNSC | -0.280803821 |
| UCK1 | Il-17alpha t cell              | HNSC | 0.050280336  |
| UCK1 | Il2_stat5_signaling            | HNSC | -0.164199732 |
| UCK1 | Il6_jak_stat3_signaling        | HNSC | -0.194131156 |
| UCK1 | Immune_checkpoints_tur         | HNSC | 0.011938242  |
| UCK1 | Immune_inhibition_cytok        | HNSC | -0.024461304 |
| UCK1 | Inositol phosphate metabo      | HNSC | -0.387705994 |
| UCK1 | Interleukin_6_signaling        | HNSC | -0.421909777 |
| UCK1 | Jaeger_metastasis_up           | HNSC | -0.013299235 |
| UCK1 | Jain_nfkb_signaling            | HNSC | -0.124127438 |
| UCK1 | Kras_signaling_up              | HNSC | -0.298620496 |

|      |                             |      |              |
|------|-----------------------------|------|--------------|
| UCK1 | Linoleic acid metabolism    | HNSC | -0.113731974 |
| UCK1 | Lipoic acid metabolism      | HNSC | 0.250588416  |
| UCK1 | Lysine degradation          | HNSC | 0.095636833  |
| UCK1 | Lysosome                    | HNSC | -0.056223758 |
| UCK1 | M1 macrophage               | HNSC | -0.068866401 |
| UCK1 | M2 macrophage               | HNSC | -0.070812532 |
| UCK1 | Mannose type o-glycan bi    | HNSC | 0.253402463  |
| UCK1 | Mapk_signaling_pathway      | HNSC | -0.414568428 |
| UCK1 | Mapk3_erk1_activation       | HNSC | -0.4120846   |
| UCK1 | Marginal zone b cell        | HNSC | 0.044255008  |
| UCK1 | Memory b cell               | HNSC | 0.071263845  |
| UCK1 | Mesenchymal cell            | HNSC | -0.039294429 |
| UCK1 | Mesenchymal stem cell       | HNSC | -0.076233193 |
| UCK1 | Metabolism of xenobiotic    | HNSC | 0.026451826  |
| UCK1 | Migrating cancer stem cel   | HNSC | -0.331149984 |
| UCK1 | Mitotic_spindle             | HNSC | -0.412224851 |
| UCK1 | Monocyte                    | HNSC | -0.051343601 |
| UCK1 | Mtor_signaling_pathway      | HNSC | -0.375100787 |
| UCK1 | Mtorc1_signaling            | HNSC | -0.26947143  |
| UCK1 | Mucin type o-glycan biosy   | HNSC | -0.412998348 |
| UCK1 | Myc_targets_v1              | HNSC | 0.091062023  |
| UCK1 | Myeloid cell                | HNSC | 0.008900475  |
| UCK1 | N-glycan biosynthesis       | HNSC | 0.098222259  |
| UCK1 | Naive b cell                | HNSC | 0.074054973  |
| UCK1 | Naive cd4+ t cell           | HNSC | -0.121071739 |
| UCK1 | Naive cd8+ t cell           | HNSC | -0.097070256 |
| UCK1 | Natural killer cell         | HNSC | 0.091073481  |
| UCK1 | Natural killer t (nkt) cell | HNSC | 0.264018939  |
| UCK1 | Natural regulatory t (treg) | HNSC | -0.024285729 |
| UCK1 | Neomycin, kanamycin and     | HNSC | -0.215168562 |
| UCK1 | Neutrophil                  | HNSC | -0.181301243 |
| UCK1 | Nicotinate and nicotinami   | HNSC | -0.118749409 |
| UCK1 | Nitrogen metabolism         | HNSC | -0.271026073 |
| UCK1 | Nod_like_receptor_signal    | HNSC | -0.332057919 |
| UCK1 | Notch_signaling             | HNSC | -0.242190168 |
| UCK1 | One carbon pool by folate   | HNSC | 0.093800074  |
| UCK1 | Other glycan degradation    | HNSC | 0.142598191  |
| UCK1 | Other types of o-glycan b   | HNSC | 0.273703359  |
| UCK1 | Oxidative phosphorylatior   | HNSC | 0.306573864  |
| UCK1 | P53_pathway                 | HNSC | -0.143277735 |
| UCK1 | P53_signaling_pathway       | HNSC | -0.143539979 |
| UCK1 | Pantothenate and coa bios   | HNSC | 0.069601615  |
| UCK1 | Pentose and glucuronate i   | HNSC | -0.041991316 |

|      |                            |      |              |
|------|----------------------------|------|--------------|
| UCK1 | Pentose phosphate pathwa   | HNSC | 0.021198372  |
| UCK1 | Pericyte                   | HNSC | -0.092841509 |
| UCK1 | Phenylalanine metabolism   | HNSC | -0.068997285 |
| UCK1 | Phenylalanine, tyrosine ar | HNSC | 0.062679099  |
| UCK1 | Phosphonate and phosphir   | HNSC | 0.033645187  |
| UCK1 | Pi3k_akt_activation        | HNSC | -0.387631198 |
| UCK1 | Pi3k_akt_mtor_signaling    | HNSC | -0.35278087  |
| UCK1 | Porphyrin and chlorophyl   | HNSC | 0.140954998  |
| UCK1 | Primary bile acid biosynt  | HNSC | 0.002146803  |
| UCK1 | Propanoate metabolism      | HNSC | -0.020443273 |
| UCK1 | Purine metabolism          | HNSC | 0.166848643  |
| UCK1 | Pyrimidine metabolism      | HNSC | 0.254278593  |
| UCK1 | Pyruvate metabolism        | HNSC | 0.109396337  |
| UCK1 | Regulation_of_autophagy    | HNSC | 0.143424428  |
| UCK1 | Retinol metabolism         | HNSC | -0.109725825 |
| UCK1 | Riboflavin metabolism      | HNSC | 0.291965414  |
| UCK1 | Schmahl_pdgf_signaling     | HNSC | -0.340950276 |
| UCK1 | Selenocompound metabol     | HNSC | 0.008131222  |
| UCK1 | Signaling_by_hippo         | HNSC | -0.492585032 |
| UCK1 | Sphingolipid metabolism    | HNSC | -0.361130309 |
| UCK1 | Starch and sucrose metabo  | HNSC | -0.215929175 |
| UCK1 | Steroid biosynthesis       | HNSC | -0.109232208 |
| UCK1 | Steroid hormone biosynth   | HNSC | -0.087026154 |
| UCK1 | Sulfur metabolism          | HNSC | -0.08885551  |
| UCK1 | Synthesis and degradation  | HNSC | 0.152827738  |
| UCK1 | T helper cell              | HNSC | 0.029729533  |
| UCK1 | T helper1 (th1) cell       | HNSC | 0.050212466  |
| UCK1 | T helper17 (th17) cell     | HNSC | -0.13751433  |
| UCK1 | T helper2 (th2) cell       | HNSC | 0.020150867  |
| UCK1 | T helper9 (th9) cell       | HNSC | 0.120943799  |
| UCK1 | Taurine and hypotaurine r  | HNSC | 0.211462706  |
| UCK1 | Terpenoid backbone biosy   | HNSC | -0.121904643 |
| UCK1 | Tgf_beta_signaling_pathw   | HNSC | -0.470104743 |
| UCK1 | Thiamine metabolism        | HNSC | 0.240483943  |
| UCK1 | Tnfa_signaling_via_nfkb    | HNSC | -0.305387397 |
| UCK1 | Tryptophan metabolism      | HNSC | 0.201244769  |
| UCK1 | Tumor endothelial cell     | HNSC | -0.226422062 |
| UCK1 | Tyrosine metabolism        | HNSC | 0.013045762  |
| UCK1 | Ubiquinone and other terç  | HNSC | 0.183822065  |
| UCK1 | Valine, leucine and isoleu | HNSC | 0.255378145  |
| UCK1 | Valine, leucine and isoleu | HNSC | 0.118907079  |
| UCK1 | Vascular endothelial cell  | HNSC | -0.060766944 |
| UCK1 | Vascular smooth muscle c   | HNSC | -0.117114193 |

|      |                                      |      |              |
|------|--------------------------------------|------|--------------|
| UCK1 | Vegf_signaling_pathway               | HNSC | -0.383544161 |
| UCK1 | Vitamin b6 metabolism                | HNSC | 0.363495652  |
| UCK1 | Willert_wnt_signaling                | HNSC | -0.139553158 |
| UCK1 | Wnt_beta_catenin_signali             | HNSC | -0.251092505 |
| UCK2 | Abnormal plasma cell                 | HNSC | -0.235954357 |
| UCK2 | Activated b cell                     | HNSC | -0.198891432 |
| UCK2 | Activated cd4+ t cell                | HNSC | -0.209444342 |
| UCK2 | Activated t cell                     | HNSC | -0.207189833 |
| UCK2 | Alanine, aspartate and glu           | HNSC | 0.311298135  |
| UCK2 | Alcala_apoptosis                     | HNSC | 0.218448953  |
| UCK2 | Alpha-linolenic acid meta            | HNSC | -0.198316356 |
| UCK2 | Amino sugar and nucleoti             | HNSC | 0.090863148  |
| UCK2 | Ampk_pathway                         | HNSC | -0.115498173 |
| UCK2 | Angiogenesis                         | HNSC | -0.141667161 |
| UCK2 | Arachidonic acid metaboli            | HNSC | -0.109667667 |
| UCK2 | Arginine and proline metε            | HNSC | 0.036444124  |
| UCK2 | Arginine biosynthesis                | HNSC | 0.126411666  |
| UCK2 | Ascorbate and aldarate mε            | HNSC | 0.158651167  |
| UCK2 | Atypical memory b cell               | HNSC | -0.130819127 |
| UCK2 | Axl+siglec6+ dendritic ce            | HNSC | -0.29835532  |
| UCK2 | B cell                               | HNSC | -0.160219836 |
| UCK2 | B1 cell                              | HNSC | -0.236144257 |
| UCK2 | Basal cell                           | HNSC | -0.177797223 |
| UCK2 | Beta-alanine metabolism              | HNSC | -0.065358181 |
| UCK2 | Biosynthesis of unsaturate           | HNSC | 0.055551026  |
| UCK2 | Biotin metabolism                    | HNSC | 0.058088013  |
| UCK2 | Butanoate metabolism                 | HNSC | 0.092945047  |
| UCK2 | Caffeine metabolism                  | HNSC | -0.012862273 |
| UCK2 | Cancer stem cell                     | HNSC | -0.114825972 |
| UCK2 | Cancer stem-like cell                | HNSC | 0.103916677  |
| UCK2 | Cd4+ cytotoxic t cell                | HNSC | -0.238992245 |
| UCK2 | Cd4+ memory t cell                   | HNSC | -0.246300981 |
| UCK2 | Cd4+ regulatory t cell               | HNSC | -0.247699401 |
| UCK2 | Cd4+ t helper cell                   | HNSC | -0.248640255 |
| UCK2 | Cd4+cd25+ regulatory t c             | HNSC | -0.238168605 |
| UCK2 | Cd8+ cytotoxic t cell                | HNSC | -0.188055958 |
| UCK2 | Cd8+ regulatory t cell               | HNSC | -0.233297554 |
| UCK2 | Cell_cycle                           | HNSC | 0.205762104  |
| UCK2 | Chandran_metastasis_top <sup>5</sup> | HNSC | 0.282470622  |
| UCK2 | Citrate cycle (tca cycle)            | HNSC | 0.232956291  |
| UCK2 | Cysteine and methionine r            | HNSC | 0.414182963  |
| UCK2 | Cytokine induced killer cε           | HNSC | -0.316535234 |
| UCK2 | D-arginine and d-ornithin            | HNSC | 0.102980011  |

|      |                              |       |              |
|------|------------------------------|-------|--------------|
| UCK2 | D-glutamine and d-glutan     | HNSC  | 0.111345622  |
| UCK2 | Dendritic cell               | HNSC  | -0.288963854 |
| UCK2 | Dna_repair                   | HNSC  | 0.358213898  |
| UCK2 | Dna_replication              | HNSC  | 0.352476405  |
| UCK2 | Double-negative memory       | HNSC  | -0.143540433 |
| UCK2 | Drug metabolism - cytoch     | HNSC  | 0.141433852  |
| UCK2 | Drug metabolism - other      | HNSC  | 0.382330007  |
| UCK2 | E2f_targets                  | HNSC  | 0.359262998  |
| UCK2 | Ecm_receptor_interaction     | HNSC  | -0.261870063 |
| UCK2 | Effector cd4+ memory t       | (HNSC | -0.272520371 |
| UCK2 | Effector cd8+ memory t       | (HNSC | -0.271276476 |
| UCK2 | Effector memory t cell       | HNSC  | -0.257599932 |
| UCK2 | Effector regulatory t (treg  | HNSC  | -0.204953573 |
| UCK2 | Elvidge_hif1a_targets_up     | HNSC  | 0.172515712  |
| UCK2 | Endothelial cell             | HNSC  | -0.180112207 |
| UCK2 | Eosinophil                   | HNSC  | -0.223480597 |
| UCK2 | Ether lipid metabolism       | HNSC  | -0.261388943 |
| UCK2 | Exhausted cd4+ t cell        | HNSC  | -0.286772814 |
| UCK2 | Exhausted cd8+ t cell        | HNSC  | -0.257516883 |
| UCK2 | Exhausted t cell             | HNSC  | -0.194562934 |
| UCK2 | Fat cell (adipocyte)         | HNSC  | -0.057606987 |
| UCK2 | Fatty acid biosynthesis      | HNSC  | -0.002193803 |
| UCK2 | Fatty acid degradation       | HNSC  | -0.038826917 |
| UCK2 | Fatty acid elongation        | HNSC  | 0.155768537  |
| UCK2 | Fibroblast                   | HNSC  | -0.28192563  |
| UCK2 | Folate biosynthesis          | HNSC  | 0.240205541  |
| UCK2 | Follicular b cell            | HNSC  | -0.274166652 |
| UCK2 | Follicular dendritic cell    | HNSC  | -0.133306971 |
| UCK2 | Follicular helper (tfh) t ce | HNSC  | -0.262281986 |
| UCK2 | Follicular t cell            | HNSC  | -0.12071399  |
| UCK2 | Foxp3+il-17+ t cell          | HNSC  | -0.320009993 |
| UCK2 | Fructose and mannose me      | HNSC  | 0.189612327  |
| UCK2 | G2m_checkpoint               | HNSC  | 0.229665798  |
| UCK2 | Galactose metabolism         | HNSC  | 0.033265592  |
| UCK2 | Galie_tumor_stemness_ge      | HNSC  | -0.223372016 |
| UCK2 | Glutathione metabolism       | HNSC  | 0.295646061  |
| UCK2 | Glycerolipid metabolism      | HNSC  | 0.010080653  |
| UCK2 | Glycerophospholipid metæ     | HNSC  | -0.003728623 |
| UCK2 | Glycine, serine and threor   | HNSC  | 0.195278158  |
| UCK2 | Glycolysis / gluconeogene    | HNSC  | 0.083453945  |
| UCK2 | Glycosaminoglycan biosy      | HNSC  | -0.153565175 |
| UCK2 | Glycosaminoglycan biosy      | HNSC  | -0.221009213 |
| UCK2 | Glycosaminoglycan biosy      | HNSC  | 0.052349303  |

|      |                           |      |              |
|------|---------------------------|------|--------------|
| UCK2 | Glycosaminoglycan degra   | HNSC | -0.142549721 |
| UCK2 | Glycosphingolipid biosyn  | HNSC | -0.243653951 |
| UCK2 | Glycosphingolipid biosyn  | HNSC | -0.049041427 |
| UCK2 | Glycosphingolipid biosyn  | HNSC | 0.065708641  |
| UCK2 | Glycosylphosphatidylinos  | HNSC | 0.207710353  |
| UCK2 | Glyoxylate and dicarboxy  | HNSC | 0.296192845  |
| UCK2 | Granulocyte               | HNSC | -0.164456315 |
| UCK2 | Hedgehog_signaling        | HNSC | -0.174093652 |
| UCK2 | Histidine metabolism      | HNSC | -0.215499933 |
| UCK2 | Hypoxia                   | HNSC | -0.107218502 |
| UCK2 | Il-17alpha t cell         | HNSC | -0.247643736 |
| UCK2 | Il2_stat5_signaling       | HNSC | -0.231842462 |
| UCK2 | Il6_jak_stat3_signaling   | HNSC | -0.284819671 |
| UCK2 | Immune_checkpoints_tur    | HNSC | -0.218587478 |
| UCK2 | Immune_inhibition_cytok   | HNSC | -0.208567405 |
| UCK2 | Inositol phosphate metabo | HNSC | -0.300647505 |
| UCK2 | Interleukin_6_signaling   | HNSC | -0.295394193 |
| UCK2 | Jaeger_metastasis_up      | HNSC | 0.141466857  |
| UCK2 | Jain_nfkb_signaling       | HNSC | 0.2886817    |
| UCK2 | Kras_signaling_up         | HNSC | -0.307796379 |
| UCK2 | Linoleic acid metabolism  | HNSC | -0.138799309 |
| UCK2 | Lipoic acid metabolism    | HNSC | 0.223044178  |
| UCK2 | Lysine degradation        | HNSC | 0.071207865  |
| UCK2 | Lysosome                  | HNSC | -0.272935566 |
| UCK2 | M1 macrophage             | HNSC | -0.223671518 |
| UCK2 | M2 macrophage             | HNSC | -0.191812151 |
| UCK2 | Mannose type o-glycan bi  | HNSC | 0.136468908  |
| UCK2 | Mapk_signaling_pathway    | HNSC | -0.298425667 |
| UCK2 | Mapk3_erk1_activation     | HNSC | -0.249573534 |
| UCK2 | Marginal zone b cell      | HNSC | -0.218986726 |
| UCK2 | Memory b cell             | HNSC | -0.218677019 |
| UCK2 | Mesenchymal cell          | HNSC | -0.093130931 |
| UCK2 | Mesenchymal stem cell     | HNSC | -0.255837075 |
| UCK2 | Metabolism of xenobiotic  | HNSC | 0.205548852  |
| UCK2 | Migrating cancer stem cel | HNSC | 0.01601877   |
| UCK2 | Mitotic_spindle           | HNSC | -0.132942889 |
| UCK2 | Monocyte                  | HNSC | -0.234354372 |
| UCK2 | Mtor_signaling_pathway    | HNSC | -0.267686837 |
| UCK2 | Mtorc1_signaling          | HNSC | 0.303793572  |
| UCK2 | Mucin type o-glycan bios  | HNSC | -0.172565156 |
| UCK2 | Myc_targets_v1            | HNSC | 0.501319464  |
| UCK2 | Myeloid cell              | HNSC | -0.254841114 |
| UCK2 | N-glycan biosynthesis     | HNSC | 0.016097329  |

|      |                             |      |              |
|------|-----------------------------|------|--------------|
| UCK2 | Naive b cell                | HNSC | -0.142435932 |
| UCK2 | Naive cd4+ t cell           | HNSC | -0.308282511 |
| UCK2 | Naive cd8+ t cell           | HNSC | -0.186774826 |
| UCK2 | Natural killer cell         | HNSC | -0.248806101 |
| UCK2 | Natural killer t (nkt) cell | HNSC | 0.111760333  |
| UCK2 | Natural regulatory t (treg) | HNSC | -0.260543409 |
| UCK2 | Neomycin, kanamycin and     | HNSC | -0.013008778 |
| UCK2 | Neutrophil                  | HNSC | -0.149287448 |
| UCK2 | Nicotinate and nicotinami   | HNSC | 0.002190374  |
| UCK2 | Nitrogen metabolism         | HNSC | -0.0943474   |
| UCK2 | Nod_like_receptor_signal    | HNSC | -0.235059229 |
| UCK2 | Notch_signaling             | HNSC | -0.120500091 |
| UCK2 | One carbon pool by folate   | HNSC | 0.444620242  |
| UCK2 | Other glycan degradation    | HNSC | -0.113364381 |
| UCK2 | Other types of o-glycan b   | HNSC | 0.016322233  |
| UCK2 | Oxidative phosphorylatio    | HNSC | 0.260336996  |
| UCK2 | P53_pathway                 | HNSC | -0.15086323  |
| UCK2 | P53_signaling_pathway       | HNSC | -0.09233885  |
| UCK2 | Pantothenate and coa bios   | HNSC | -0.102635594 |
| UCK2 | Pentose and glucuronate i   | HNSC | 0.213567638  |
| UCK2 | Pentose phosphate pathwa    | HNSC | 0.234127171  |
| UCK2 | Pericyte                    | HNSC | -0.224697429 |
| UCK2 | Phenylalanine metabolism    | HNSC | 0.129351109  |
| UCK2 | Phenylalanine, tyrosine ar  | HNSC | 0.17010235   |
| UCK2 | Phosphonate and phosphir    | HNSC | 0.090323187  |
| UCK2 | Pi3k_akt_activation         | HNSC | -0.284509443 |
| UCK2 | Pi3k_akt_mtor_signaling     | HNSC | -0.212575107 |
| UCK2 | Porphyrin and chlorophyl    | HNSC | 0.310155084  |
| UCK2 | Primary bile acid biosynt   | HNSC | -0.263717072 |
| UCK2 | Propanoate metabolism       | HNSC | 0.105667952  |
| UCK2 | Purine metabolism           | HNSC | 0.521240096  |
| UCK2 | Pyrimidine metabolism       | HNSC | 0.502121707  |
| UCK2 | Pyruvate metabolism         | HNSC | 0.224551055  |
| UCK2 | Regulation_of_autophagy     | HNSC | -0.127023835 |
| UCK2 | Retinol metabolism          | HNSC | 0.046126303  |
| UCK2 | Riboflavin metabolism       | HNSC | 0.219050106  |
| UCK2 | Schmahl_pdgf_signaling      | HNSC | -0.309246586 |
| UCK2 | Selenocompound metabol      | HNSC | 0.364778313  |
| UCK2 | Signaling_by_hippo          | HNSC | -0.173026694 |
| UCK2 | Sphingolipid metabolism     | HNSC | -0.25645034  |
| UCK2 | Starch and sucrose metabo   | HNSC | -0.141025752 |
| UCK2 | Steroid biosynthesis        | HNSC | 0.187847917  |
| UCK2 | Steroid hormone biosynth    | HNSC | 0.187981527  |

|       |                            |      |              |
|-------|----------------------------|------|--------------|
| UCK2  | Sulfur metabolism          | HNSC | 0.011756601  |
| UCK2  | Synthesis and degradation  | HNSC | 0.155172834  |
| UCK2  | T helper cell              | HNSC | -0.275751199 |
| UCK2  | T helper1 (th1) cell       | HNSC | -0.239403895 |
| UCK2  | T helper17 (th17) cell     | HNSC | -0.212433582 |
| UCK2  | T helper2 (th2) cell       | HNSC | -0.264629611 |
| UCK2  | T helper9 (th9) cell       | HNSC | -0.264322903 |
| UCK2  | Taurine and hypotaurine r  | HNSC | -0.070647445 |
| UCK2  | Terpenoid backbone biosy   | HNSC | 0.12910073   |
| UCK2  | Tgf_beta_signaling_pathw   | HNSC | -0.239994514 |
| UCK2  | Thiamine metabolism        | HNSC | 0.15801551   |
| UCK2  | Tnfa_signaling_via_nfkb    | HNSC | -0.166682878 |
| UCK2  | Tryptophan metabolism      | HNSC | 0.001610715  |
| UCK2  | Tumor endothelial cell     | HNSC | -0.153199933 |
| UCK2  | Tyrosine metabolism        | HNSC | 0.047697218  |
| UCK2  | Ubiquinone and other terç  | HNSC | 0.312681773  |
| UCK2  | Valine, leucine and isoleu | HNSC | 0.158806569  |
| UCK2  | Valine, leucine and isoleu | HNSC | 0.111030445  |
| UCK2  | Vascular endothelial cell  | HNSC | -0.19668627  |
| UCK2  | Vascular smooth muscle c   | HNSC | -0.072651456 |
| UCK2  | Vegf_signaling_pathway     | HNSC | -0.333209209 |
| UCK2  | Vitamin b6 metabolism      | HNSC | 0.240144886  |
| UCK2  | Willert_wnt_signaling      | HNSC | 0.047788604  |
| UCK2  | Wnt_beta_catenin_signali   | HNSC | -0.151517685 |
| UCKL1 | Abnormal plasma cell       | HNSC | -0.115949094 |
| UCKL1 | Activated b cell           | HNSC | -0.135667034 |
| UCKL1 | Activated cd4+ t cell      | HNSC | -0.182386406 |
| UCKL1 | Activated t cell           | HNSC | -0.124219683 |
| UCKL1 | Alanine, aspartate and glu | HNSC | 0.014457989  |
| UCKL1 | Alcala_apoptosis           | HNSC | 0.136328876  |
| UCKL1 | Alpha-linolenic acid meta  | HNSC | -0.080695472 |
| UCKL1 | Amino sugar and nucleoti   | HNSC | -0.024197981 |
| UCKL1 | Ampk_pathway               | HNSC | -0.053910056 |
| UCKL1 | Angiogenesis               | HNSC | -0.217361555 |
| UCKL1 | Arachidonic acid metabol   | HNSC | -0.078145419 |
| UCKL1 | Arginine and proline metæ  | HNSC | -0.047627695 |
| UCKL1 | Arginine biosynthesis      | HNSC | -0.082747927 |
| UCKL1 | Ascorbate and aldarate mε  | HNSC | -0.137903064 |
| UCKL1 | Atypical memory b cell     | HNSC | -0.051846589 |
| UCKL1 | Axl+siglec6+ dendritic ce  | HNSC | -0.291207197 |
| UCKL1 | B cell                     | HNSC | -0.127013271 |
| UCKL1 | B1 cell                    | HNSC | -0.18379901  |
| UCKL1 | Basal cell                 | HNSC | -0.163966212 |



|       |                             |      |              |
|-------|-----------------------------|------|--------------|
| UCKL1 | Beta-alanine metabolism     | HNSC | -0.081501409 |
| UCKL1 | Biosynthesis of unsaturate  | HNSC | -0.070680136 |
| UCKL1 | Biotin metabolism           | HNSC | 0.106219185  |
| UCKL1 | Butanoate metabolism        | HNSC | 0.203406124  |
| UCKL1 | Caffeine metabolism         | HNSC | -0.12768209  |
| UCKL1 | Cancer stem cell            | HNSC | -0.325672294 |
| UCKL1 | Cancer stem-like cell       | HNSC | -0.119512338 |
| UCKL1 | Cd4+ cytotoxic t cell       | HNSC | -0.155290334 |
| UCKL1 | Cd4+ memory t cell          | HNSC | -0.195079714 |
| UCKL1 | Cd4+ regulatory t cell      | HNSC | -0.225065568 |
| UCKL1 | Cd4+ t helper cell          | HNSC | -0.1529804   |
| UCKL1 | Cd4+cd25+ regulatory t c    | HNSC | -0.157400917 |
| UCKL1 | Cd8+ cytotoxic t cell       | HNSC | -0.034072534 |
| UCKL1 | Cd8+ regulatory t cell      | HNSC | -0.131756108 |
| UCKL1 | Cell_cycle                  | HNSC | -0.121981474 |
| UCKL1 | Chandran_metastasis_top5    | HNSC | -0.154611287 |
| UCKL1 | Citrate cycle (tca cycle)   | HNSC | 0.088612242  |
| UCKL1 | Cysteine and methionine r   | HNSC | 0.05690944   |
| UCKL1 | Cytokine induced killer c   | HNSC | -0.077610853 |
| UCKL1 | D-arginine and d-ornithin   | HNSC | -0.021381742 |
| UCKL1 | D-glutamine and d-glutan    | HNSC | -0.186252518 |
| UCKL1 | Dendritic cell              | HNSC | -0.21482236  |
| UCKL1 | Dna_repair                  | HNSC | 0.368576652  |
| UCKL1 | Dna_replication             | HNSC | 0.133953424  |
| UCKL1 | Double-negative memory      | HNSC | 0.007452309  |
| UCKL1 | Drug metabolism - cytoch    | HNSC | -0.030788676 |
| UCKL1 | Drug metabolism - other c   | HNSC | 0.217342812  |
| UCKL1 | E2f_targets                 | HNSC | 0.035110581  |
| UCKL1 | Ecm_receptor_interaction    | HNSC | -0.342019595 |
| UCKL1 | Effector cd4+ memory t (    | HNSC | -0.224045634 |
| UCKL1 | Effector cd8+ memory t (    | HNSC | -0.223404735 |
| UCKL1 | Effector memory t cell      | HNSC | -0.214803548 |
| UCKL1 | Effector regulatory t (treg | HNSC | -0.263274258 |
| UCKL1 | Elvidge_hif1a_targets_up    | HNSC | -0.333313146 |
| UCKL1 | Endothelial cell            | HNSC | -0.336039038 |
| UCKL1 | Eosinophil                  | HNSC | -0.191313646 |
| UCKL1 | Ether lipid metabolism      | HNSC | -0.229784303 |
| UCKL1 | Exhausted cd4+ t cell       | HNSC | -0.237377417 |
| UCKL1 | Exhausted cd8+ t cell       | HNSC | -0.197977038 |
| UCKL1 | Exhausted t cell            | HNSC | -0.066386912 |
| UCKL1 | Fat cell (adipocyte)        | HNSC | 0.16816985   |
| UCKL1 | Fatty acid biosynthesis     | HNSC | -0.111714806 |
| UCKL1 | Fatty acid degradation      | HNSC | 0.030723786  |

|       |                              |      |              |
|-------|------------------------------|------|--------------|
| UCKL1 | Fatty acid elongation        | HNSC | 0.091818682  |
| UCKL1 | Fibroblast                   | HNSC | -0.282554362 |
| UCKL1 | Folate biosynthesis          | HNSC | 0.113764667  |
| UCKL1 | Follicular b cell            | HNSC | -0.166166383 |
| UCKL1 | Follicular dendritic cell    | HNSC | -0.160188013 |
| UCKL1 | Follicular helper (tfh) t ce | HNSC | -0.191460397 |
| UCKL1 | Follicular t cell            | HNSC | 0.023293702  |
| UCKL1 | Foxp3+il-17+ t cell          | HNSC | -0.271116561 |
| UCKL1 | Fructose and mannose me      | HNSC | 0.174099994  |
| UCKL1 | G2m_checkpoint               | HNSC | -0.185661351 |
| UCKL1 | Galactose metabolism         | HNSC | -0.042624875 |
| UCKL1 | Galie_tumor_stemness_ge      | HNSC | -0.388896652 |
| UCKL1 | Glutathione metabolism       | HNSC | 0.088170694  |
| UCKL1 | Glycerolipid metabolism      | HNSC | -0.052388809 |
| UCKL1 | Glycerophospholipid metæ     | HNSC | 0.187012824  |
| UCKL1 | Glycine, serine and threor   | HNSC | 0.128493489  |
| UCKL1 | Glycolysis / gluconeogene    | HNSC | 0.004887503  |
| UCKL1 | Glycosaminoglycan biosy1     | HNSC | -0.064149755 |
| UCKL1 | Glycosaminoglycan biosy1     | HNSC | -0.188234938 |
| UCKL1 | Glycosaminoglycan biosy1     | HNSC | -0.120115882 |
| UCKL1 | Glycosaminoglycan degra      | HNSC | -0.133588843 |
| UCKL1 | Glycosphingolipid biosyn1    | HNSC | -0.092483738 |
| UCKL1 | Glycosphingolipid biosyn1    | HNSC | -0.094635527 |
| UCKL1 | Glycosphingolipid biosyn1    | HNSC | -0.162695825 |
| UCKL1 | Glycosylphosphatidylinos:    | HNSC | 0.221514258  |
| UCKL1 | Glyoxylate and dicarboxy     | HNSC | 0.287621163  |
| UCKL1 | Granulocyte                  | HNSC | -0.173715416 |
| UCKL1 | Hedgehog_signaling           | HNSC | -0.379793723 |
| UCKL1 | Histidine metabolism         | HNSC | -0.210538017 |
| UCKL1 | Hypoxia                      | HNSC | -0.125875199 |
| UCKL1 | Il-17ralpha t cell           | HNSC | -0.172813229 |
| UCKL1 | Il2_stat5_signaling          | HNSC | -0.337248762 |
| UCKL1 | Il6_jak_stat3_signaling      | HNSC | -0.331546412 |
| UCKL1 | Immune_checkpoints_tunr      | HNSC | -0.184424116 |
| UCKL1 | Immune_inhibition_cytok      | HNSC | -0.095986284 |
| UCKL1 | Inositol phosphate metabo    | HNSC | -0.478688754 |
| UCKL1 | Interleukin_6_signaling      | HNSC | -0.49904954  |
| UCKL1 | Jaeger_metastasis_up         | HNSC | -0.116619935 |
| UCKL1 | Jain_nfkb_signaling          | HNSC | -0.018036648 |
| UCKL1 | Kras_signaling_up            | HNSC | -0.381915722 |
| UCKL1 | Linoleic acid metabolism     | HNSC | -0.062358533 |
| UCKL1 | Lipoic acid metabolism       | HNSC | 0.32252719   |
| UCKL1 | Lysine degradation           | HNSC | -0.169664375 |

|       |                             |      |              |
|-------|-----------------------------|------|--------------|
| UCKL1 | Lysosome                    | HNSC | -0.164456046 |
| UCKL1 | M1 macrophage               | HNSC | -0.2406469   |
| UCKL1 | M2 macrophage               | HNSC | -0.225428419 |
| UCKL1 | Mannose type o-glycan bi    | HNSC | 0.17444122   |
| UCKL1 | Mapk_signaling_pathway      | HNSC | -0.456067685 |
| UCKL1 | Mapk3_erk1_activation       | HNSC | -0.523645638 |
| UCKL1 | Marginal zone b cell        | HNSC | -0.209169437 |
| UCKL1 | Memory b cell               | HNSC | -0.17832088  |
| UCKL1 | Mesenchymal cell            | HNSC | -0.10885981  |
| UCKL1 | Mesenchymal stem cell       | HNSC | -0.292773027 |
| UCKL1 | Metabolism of xenobiotic    | HNSC | 0.038706556  |
| UCKL1 | Migrating cancer stem cel   | HNSC | -0.283687643 |
| UCKL1 | Mitotic_spindle             | HNSC | -0.476614372 |
| UCKL1 | Monocyte                    | HNSC | -0.167399838 |
| UCKL1 | Mtor_signaling_pathway      | HNSC | -0.453927828 |
| UCKL1 | Mtorc1_signaling            | HNSC | -0.082252221 |
| UCKL1 | Mucin type o-glycan bios    | HNSC | -0.407094903 |
| UCKL1 | Myc_targets_v1              | HNSC | 0.257930089  |
| UCKL1 | Myeloid cell                | HNSC | -0.226900812 |
| UCKL1 | N-glycan biosynthesis       | HNSC | -0.133258453 |
| UCKL1 | Naive b cell                | HNSC | -0.06644571  |
| UCKL1 | Naive cd4+ t cell           | HNSC | -0.32847599  |
| UCKL1 | Naive cd8+ t cell           | HNSC | -0.245132006 |
| UCKL1 | Natural killer cell         | HNSC | -0.148354499 |
| UCKL1 | Natural killer t (nkt) cell | HNSC | 0.209757221  |
| UCKL1 | Natural regulatory t (treg) | HNSC | -0.297577732 |
| UCKL1 | Neomycin, kanamycin an      | HNSC | -0.172026189 |
| UCKL1 | Neutrophil                  | HNSC | -0.207281263 |
| UCKL1 | Nicotinate and nicotinami   | HNSC | -0.065676141 |
| UCKL1 | Nitrogen metabolism         | HNSC | -0.276107076 |
| UCKL1 | Nod_like_receptor_signal    | HNSC | -0.245995265 |
| UCKL1 | Notch_signaling             | HNSC | -0.235416606 |
| UCKL1 | One carbon pool by folate   | HNSC | 0.088493978  |
| UCKL1 | Other glycan degradation    | HNSC | 0.117507265  |
| UCKL1 | Other types of o-glycan b   | HNSC | 0.190695464  |
| UCKL1 | Oxidative phosphorylatio    | HNSC | 0.400285472  |
| UCKL1 | P53_pathway                 | HNSC | -0.100211465 |
| UCKL1 | P53_signaling_pathway       | HNSC | -0.304260736 |
| UCKL1 | Pantothenate and coa bios   | HNSC | 0.054424125  |
| UCKL1 | Pentose and glucuronate i   | HNSC | -0.067529493 |
| UCKL1 | Pentose phosphate pathwa    | HNSC | 0.035245318  |
| UCKL1 | Pericyte                    | HNSC | -0.228681149 |
| UCKL1 | Phenylalanine metabolism    | HNSC | -0.083588654 |

|       |                            |      |              |
|-------|----------------------------|------|--------------|
| UCKL1 | Phenylalanine, tyrosine ar | HNSC | 0.117875259  |
| UCKL1 | Phosphonate and phosphir   | HNSC | 0.015876606  |
| UCKL1 | Pi3k_akt_activation        | HNSC | -0.444580751 |
| UCKL1 | Pi3k_akt_mtor_signaling    | HNSC | -0.363564604 |
| UCKL1 | Porphyrin and chlorophyl   | HNSC | 0.075187343  |
| UCKL1 | Primary bile acid biosynt  | HNSC | 0.015841921  |
| UCKL1 | Propanoate metabolism      | HNSC | 0.061062556  |
| UCKL1 | Purine metabolism          | HNSC | 0.158593794  |
| UCKL1 | Pyrimidine metabolism      | HNSC | 0.277751003  |
| UCKL1 | Pyruvate metabolism        | HNSC | 0.195006977  |
| UCKL1 | Regulation_of_autophagy    | HNSC | 0.193025563  |
| UCKL1 | Retinol metabolism         | HNSC | -0.043809421 |
| UCKL1 | Riboflavin metabolism      | HNSC | 0.171660237  |
| UCKL1 | Schmahl_pdgf_signaling     | HNSC | -0.462075404 |
| UCKL1 | Selenocompound metabol     | HNSC | 0.010150905  |
| UCKL1 | Signaling_by_hippo         | HNSC | -0.429026843 |
| UCKL1 | Sphingolipid metabolism    | HNSC | -0.425562261 |
| UCKL1 | Starch and sucrose metabo  | HNSC | -0.161366932 |
| UCKL1 | Steroid biosynthesis       | HNSC | 0.093301968  |
| UCKL1 | Steroid hormone biosynth   | HNSC | -0.051259467 |
| UCKL1 | Sulfur metabolism          | HNSC | 0.046377947  |
| UCKL1 | Synthesis and degradation  | HNSC | 0.273027779  |
| UCKL1 | T helper cell              | HNSC | -0.210562295 |
| UCKL1 | T helper1 (th1) cell       | HNSC | -0.152403073 |
| UCKL1 | T helper17 (th17) cell     | HNSC | -0.212706763 |
| UCKL1 | T helper2 (th2) cell       | HNSC | -0.173214386 |
| UCKL1 | T helper9 (th9) cell       | HNSC | -0.125126281 |
| UCKL1 | Taurine and hypotaurine r  | HNSC | 0.227701743  |
| UCKL1 | Terpenoid backbone biosy   | HNSC | 0.051096472  |
| UCKL1 | Tgf_beta_signaling_pathw   | HNSC | -0.464374324 |
| UCKL1 | Thiamine metabolism        | HNSC | 0.200767536  |
| UCKL1 | Tnfa_signaling_via_nfkb    | HNSC | -0.221830902 |
| UCKL1 | Tryptophan metabolism      | HNSC | -0.017993845 |
| UCKL1 | Tumor endothelial cell     | HNSC | -0.04118964  |
| UCKL1 | Tyrosine metabolism        | HNSC | -0.031097349 |
| UCKL1 | Ubiquinone and other ter   | HNSC | 0.27936057   |
| UCKL1 | Valine, leucine and isoleu | HNSC | 0.118067154  |
| UCKL1 | Valine, leucine and isoleu | HNSC | 0.145287625  |
| UCKL1 | Vascular endothelial cell  | HNSC | -0.271131669 |
| UCKL1 | Vascular smooth muscle c   | HNSC | -0.183526742 |
| UCKL1 | Vegf_signaling_pathway     | HNSC | -0.417350828 |
| UCKL1 | Vitamin b6 metabolism      | HNSC | 0.116714068  |
| UCKL1 | Willert_wnt_signaling      | HNSC | 0.028855084  |

|       |                            |      |              |
|-------|----------------------------|------|--------------|
| UCKL1 | Wnt_beta_catenin_signali   | HNSC | -0.313814616 |
| UPP1  | Abnormal plasma cell       | HNSC | -0.093431564 |
| UPP1  | Activated b cell           | HNSC | -0.200663084 |
| UPP1  | Activated cd4+ t cell      | HNSC | -0.225387575 |
| UPP1  | Activated t cell           | HNSC | -0.22455836  |
| UPP1  | Alanine, aspartate and glu | HNSC | -0.061440002 |
| UPP1  | Alcala_apoptosis           | HNSC | 0.304763625  |
| UPP1  | Alpha-linolenic acid meta  | HNSC | 0.247171854  |
| UPP1  | Amino sugar and nucleoti   | HNSC | 0.50025076   |
| UPP1  | Ampk_pathway               | HNSC | -0.118551191 |
| UPP1  | Angiogenesis               | HNSC | 0.145307014  |
| UPP1  | Arachidonic acid metabol   | HNSC | 0.177948222  |
| UPP1  | Arginine and proline metæ  | HNSC | 0.286992527  |
| UPP1  | Arginine biosynthesis      | HNSC | 0.184924051  |
| UPP1  | Ascorbate and aldarate mε  | HNSC | -0.139592545 |
| UPP1  | Atypical memory b cell     | HNSC | -0.237632085 |
| UPP1  | Axl+siglec6+ dendritic ce  | HNSC | -0.266536853 |
| UPP1  | B cell                     | HNSC | -0.348285782 |
| UPP1  | B1 cell                    | HNSC | -0.269583131 |
| UPP1  | Basal cell                 | HNSC | 0.430791377  |
| UPP1  | Beta-alanine metabolism    | HNSC | 0.105766833  |
| UPP1  | Biosynthesis of unsaturate | HNSC | 0.180610498  |
| UPP1  | Biotin metabolism          | HNSC | -0.191167428 |
| UPP1  | Butanoate metabolism       | HNSC | 0.063779939  |
| UPP1  | Caffeine metabolism        | HNSC | 0.185185841  |
| UPP1  | Cancer stem cell           | HNSC | -0.247942902 |
| UPP1  | Cancer stem-like cell      | HNSC | -0.366564736 |
| UPP1  | Cd4+ cytotoxic t cell      | HNSC | -0.047032201 |
| UPP1  | Cd4+ memory t cell         | HNSC | -0.206222271 |
| UPP1  | Cd4+ regulatory t cell     | HNSC | -0.24893831  |
| UPP1  | Cd4+ t helper cell         | HNSC | -0.241242831 |
| UPP1  | Cd4+cd25+ regulatory t c   | HNSC | -0.225669515 |
| UPP1  | Cd8+ cytotoxic t cell      | HNSC | -0.078970944 |
| UPP1  | Cd8+ regulatory t cell     | HNSC | -0.155450164 |
| UPP1  | Cell_cycle                 | HNSC | -0.22945085  |
| UPP1  | Chandran_metastasis_topε   | HNSC | -0.093875724 |
| UPP1  | Citrate cycle (tca cycle)  | HNSC | 0.302678819  |
| UPP1  | Cysteine and methionine r  | HNSC | -0.033296262 |
| UPP1  | Cytokine induced killer cε | HNSC | -0.173733274 |
| UPP1  | D-arginine and d-ornithin  | HNSC | 0.047535283  |
| UPP1  | D-glutamine and d-glutan   | HNSC | -0.19156881  |
| UPP1  | Dendritic cell             | HNSC | -0.133498598 |
| UPP1  | Dna_repair                 | HNSC | 0.204931472  |

|      |                              |       |              |
|------|------------------------------|-------|--------------|
| UPP1 | Dna_replication              | HNSC  | -0.147300306 |
| UPP1 | Double-negative memory       | HNSC  | -0.241736182 |
| UPP1 | Drug metabolism - cytoch     | HNSC  | -0.013328053 |
| UPP1 | Drug metabolism - other      | HNSC  | 0.345727199  |
| UPP1 | E2f_targets                  | HNSC  | -0.166928173 |
| UPP1 | Ecm_receptor_interaction     | HNSC  | 0.006176778  |
| UPP1 | Effector cd4+ memory t       | (HNSC | -0.298235965 |
| UPP1 | Effector cd8+ memory t       | (HNSC | -0.012626582 |
| UPP1 | Effector memory t cell       | HNSC  | -0.251956909 |
| UPP1 | Effector regulatory t (treg  | HNSC  | -0.238405465 |
| UPP1 | Elvidge_hif1a_targets_up     | HNSC  | 0.200851186  |
| UPP1 | Endothelial cell             | HNSC  | -0.29964262  |
| UPP1 | Eosinophil                   | HNSC  | -0.115149946 |
| UPP1 | Ether lipid metabolism       | HNSC  | 0.17432989   |
| UPP1 | Exhausted cd4+ t cell        | HNSC  | -0.15282496  |
| UPP1 | Exhausted cd8+ t cell        | HNSC  | -0.134308321 |
| UPP1 | Exhausted t cell             | HNSC  | -0.145822643 |
| UPP1 | Fat cell (adipocyte)         | HNSC  | -0.030670827 |
| UPP1 | Fatty acid biosynthesis      | HNSC  | 0.169552147  |
| UPP1 | Fatty acid degradation       | HNSC  | -0.005849056 |
| UPP1 | Fatty acid elongation        | HNSC  | 0.404125148  |
| UPP1 | Fibroblast                   | HNSC  | -0.099494366 |
| UPP1 | Folate biosynthesis          | HNSC  | 0.353516138  |
| UPP1 | Follicular b cell            | HNSC  | -0.317266991 |
| UPP1 | Follicular dendritic cell    | HNSC  | -0.223601384 |
| UPP1 | Follicular helper (tfh) t ce | HNSC  | -0.169088456 |
| UPP1 | Follicular t cell            | HNSC  | -0.080590718 |
| UPP1 | Foxp3+il-17+ t cell          | HNSC  | -0.273783593 |
| UPP1 | Fructose and mannose me      | HNSC  | 0.483500651  |
| UPP1 | G2m_checkpoint               | HNSC  | -0.182447238 |
| UPP1 | Galactose metabolism         | HNSC  | 0.477457211  |
| UPP1 | Galie_tumor_stemness_ge      | HNSC  | -0.009208182 |
| UPP1 | Glutathione metabolism       | HNSC  | 0.123431502  |
| UPP1 | Glycerolipid metabolism      | HNSC  | 0.244342469  |
| UPP1 | Glycerophospholipid metæ     | HNSC  | 0.228823047  |
| UPP1 | Glycine, serine and threor   | HNSC  | 0.249876691  |
| UPP1 | Glycolysis / gluconeogene    | HNSC  | 0.256423169  |
| UPP1 | Glycosaminoglycan biosy      | HNSC  | 0.030770502  |
| UPP1 | Glycosaminoglycan biosy      | HNSC  | -0.034005529 |
| UPP1 | Glycosaminoglycan biosy      | HNSC  | -0.029890318 |
| UPP1 | Glycosaminoglycan degra      | HNSC  | 0.073886499  |
| UPP1 | Glycosphingolipid biosyn     | HNSC  | -0.065638674 |
| UPP1 | Glycosphingolipid biosyn     | HNSC  | -0.152146364 |

|      |                           |      |              |
|------|---------------------------|------|--------------|
| UPP1 | Glycosphingolipid biosyn  | HNSC | 0.000637579  |
| UPP1 | Glycosylphosphatidylinos  | HNSC | 0.104052505  |
| UPP1 | Glyoxylate and dicarboxy  | HNSC | 0.117913915  |
| UPP1 | Granulocyte               | HNSC | -0.069594226 |
| UPP1 | Hedgehog_signaling        | HNSC | -0.181880718 |
| UPP1 | Histidine metabolism      | HNSC | 0.03943453   |
| UPP1 | Hypoxia                   | HNSC | 0.297618223  |
| UPP1 | Il-17ralpha t cell        | HNSC | -0.139437023 |
| UPP1 | Il2_stat5_signaling       | HNSC | 0.075905027  |
| UPP1 | Il6_jak_stat3_signaling   | HNSC | 0.098427133  |
| UPP1 | Immune_checkpoints_tur    | HNSC | 0.027134491  |
| UPP1 | Immune_inhibition_cytok   | HNSC | 0.204795158  |
| UPP1 | Inositol phosphate metabo | HNSC | -0.187449943 |
| UPP1 | Interleukin_6_signaling   | HNSC | -0.145966019 |
| UPP1 | Jaeger_metastasis_up      | HNSC | -0.303256543 |
| UPP1 | Jain_nfkb_signaling       | HNSC | 0.230976908  |
| UPP1 | Kras_signaling_up         | HNSC | 0.092233772  |
| UPP1 | Linoleic acid metabolism  | HNSC | 0.138189156  |
| UPP1 | Lipoic acid metabolism    | HNSC | -0.086415451 |
| UPP1 | Lysine degradation        | HNSC | -0.425435167 |
| UPP1 | Lysosome                  | HNSC | 0.159218467  |
| UPP1 | M1 macrophage             | HNSC | -0.063407139 |
| UPP1 | M2 macrophage             | HNSC | 0.096489247  |
| UPP1 | Mannose type o-glycan bi  | HNSC | -0.077278367 |
| UPP1 | Mapk_signaling_pathway    | HNSC | -0.054054056 |
| UPP1 | Mapk3_erk1_activation     | HNSC | -0.065633638 |
| UPP1 | Marginal zone b cell      | HNSC | -0.326066058 |
| UPP1 | Memory b cell             | HNSC | -0.308591881 |
| UPP1 | Mesenchymal cell          | HNSC | 0.037663533  |
| UPP1 | Mesenchymal stem cell     | HNSC | -0.251902403 |
| UPP1 | Metabolism of xenobiotic  | HNSC | 0.028677487  |
| UPP1 | Migrating cancer stem cel | HNSC | 0.364179487  |
| UPP1 | Mitotic_spindle           | HNSC | -0.195651613 |
| UPP1 | Monocyte                  | HNSC | 0.150886142  |
| UPP1 | Mtor_signaling_pathway    | HNSC | 0.147748763  |
| UPP1 | Mtorc1_signaling          | HNSC | 0.422804356  |
| UPP1 | Mucin type o-glycan bios  | HNSC | 0.022919426  |
| UPP1 | Myc_targets_v1            | HNSC | 0.332243569  |
| UPP1 | Myeloid cell              | HNSC | -0.170056878 |
| UPP1 | N-glycan biosynthesis     | HNSC | 0.052088317  |
| UPP1 | Naive b cell              | HNSC | -0.139544777 |
| UPP1 | Naive cd4+ t cell         | HNSC | -0.238066005 |
| UPP1 | Naive cd8+ t cell         | HNSC | -0.341134603 |

|      |                             |      |              |
|------|-----------------------------|------|--------------|
| UPP1 | Natural killer cell         | HNSC | -0.122330793 |
| UPP1 | Natural killer t (nkt) cell | HNSC | -0.082556277 |
| UPP1 | Natural regulatory t (treg) | HNSC | -0.23086645  |
| UPP1 | Neomycin, kanamycin and     | HNSC | 0.203931648  |
| UPP1 | Neutrophil                  | HNSC | 0.339548292  |
| UPP1 | Nicotinate and nicotinami   | HNSC | 0.240981683  |
| UPP1 | Nitrogen metabolism         | HNSC | 0.133346728  |
| UPP1 | Nod_like_receptor_signal    | HNSC | 0.315976795  |
| UPP1 | Notch_signaling             | HNSC | 0.106303821  |
| UPP1 | One carbon pool by folate   | HNSC | 0.027672639  |
| UPP1 | Other glycan degradation    | HNSC | 0.143380759  |
| UPP1 | Other types of o-glycan b   | HNSC | -0.07673349  |
| UPP1 | Oxidative phosphorylatio    | HNSC | 0.360826613  |
| UPP1 | P53_pathway                 | HNSC | 0.4552339    |
| UPP1 | P53_signaling_pathway       | HNSC | -0.179615662 |
| UPP1 | Pantothenate and coa bios   | HNSC | 0.120205237  |
| UPP1 | Pentose and glucuronate i   | HNSC | 0.038726967  |
| UPP1 | Pentose phosphate pathwa    | HNSC | 0.225779172  |
| UPP1 | Pericyte                    | HNSC | -0.071749599 |
| UPP1 | Phenylalanine metabolism    | HNSC | 0.159535438  |
| UPP1 | Phenylalanine, tyrosine ar  | HNSC | 0.05786333   |
| UPP1 | Phosphonate and phosphir    | HNSC | -0.034854643 |
| UPP1 | Pi3k_akt_activation         | HNSC | -0.049232162 |
| UPP1 | Pi3k_akt_mtor_signaling     | HNSC | 0.308364131  |
| UPP1 | Porphyrin and chlorophyl    | HNSC | 0.169392104  |
| UPP1 | Primary bile acid biosynt   | HNSC | 0.130798877  |
| UPP1 | Propanoate metabolism       | HNSC | -0.056840034 |
| UPP1 | Purine metabolism           | HNSC | 0.203282689  |
| UPP1 | Pyrimidine metabolism       | HNSC | 0.259802456  |
| UPP1 | Pyruvate metabolism         | HNSC | 0.135654922  |
| UPP1 | Regulation_of_autophagy     | HNSC | 0.111429742  |
| UPP1 | Retinol metabolism          | HNSC | 0.1826038    |
| UPP1 | Riboflavin metabolism       | HNSC | 0.182234941  |
| UPP1 | Schmahl_pdgf_signaling      | HNSC | -0.10685258  |
| UPP1 | Selenocompound metabol      | HNSC | -0.335844741 |
| UPP1 | Signaling_by_hippo          | HNSC | 0.037762697  |
| UPP1 | Sphingolipid metabolism     | HNSC | 0.294145907  |
| UPP1 | Starch and sucrose metabo   | HNSC | 0.281608871  |
| UPP1 | Steroid biosynthesis        | HNSC | 0.284679914  |
| UPP1 | Steroid hormone biosynth    | HNSC | 0.176813215  |
| UPP1 | Sulfur metabolism           | HNSC | 0.057214395  |
| UPP1 | Synthesis and degradation   | HNSC | 0.259785053  |
| UPP1 | T helper cell               | HNSC | -0.19512021  |



|      |                            |      |              |
|------|----------------------------|------|--------------|
| UPP1 | T helper1 (th1) cell       | HNSC | 0.005508063  |
| UPP1 | T helper17 (th17) cell     | HNSC | 0.086037519  |
| UPP1 | T helper2 (th2) cell       | HNSC | -0.104938824 |
| UPP1 | T helper9 (th9) cell       | HNSC | -0.184209994 |
| UPP1 | Taurine and hypotaurine r  | HNSC | -0.192195426 |
| UPP1 | Terpenoid backbone biosy   | HNSC | 0.412480129  |
| UPP1 | Tgf_beta_signaling_pathw   | HNSC | -0.0750988   |
| UPP1 | Thiamine metabolism        | HNSC | 0.308154337  |
| UPP1 | Tnfa_signaling_via_nfkb    | HNSC | 0.272689825  |
| UPP1 | Tryptophan metabolism      | HNSC | -0.157410315 |
| UPP1 | Tumor endothelial cell     | HNSC | 0.43929311   |
| UPP1 | Tyrosine metabolism        | HNSC | 0.178656173  |
| UPP1 | Ubiquinone and other terf  | HNSC | 0.190858358  |
| UPP1 | Valine, leucine and isoleu | HNSC | 0.016897489  |
| UPP1 | Valine, leucine and isoleu | HNSC | -0.085803517 |
| UPP1 | Vascular endothelial cell  | HNSC | -0.181153189 |
| UPP1 | Vascular smooth muscle c   | HNSC | -0.200474173 |
| UPP1 | Vegf_signaling_pathway     | HNSC | 0.12543183   |
| UPP1 | Vitamin b6 metabolism      | HNSC | -0.006716164 |
| UPP1 | Willert_wnt_signaling      | HNSC | 0.398088927  |
| UPP1 | Wnt_beta_catenin_signali   | HNSC | -0.282464677 |
| UPP2 | Abnormal plasma cell       | HNSC | 0.006149774  |
| UPP2 | Activated b cell           | HNSC | -0.053343292 |
| UPP2 | Activated cd4+ t cell      | HNSC | -0.058162318 |
| UPP2 | Activated t cell           | HNSC | -0.059456741 |
| UPP2 | Alanine, aspartate and glu | HNSC | -0.009585877 |
| UPP2 | Alcala_apoptosis           | HNSC | -0.156049027 |
| UPP2 | Alpha-linolenic acid meta  | HNSC | -0.029324265 |
| UPP2 | Amino sugar and nucleoti   | HNSC | -0.102277676 |
| UPP2 | Ampk_pathway               | HNSC | -0.026751824 |
| UPP2 | Angiogenesis               | HNSC | -0.065828149 |
| UPP2 | Arachidonic acid metabol   | HNSC | -0.03728045  |
| UPP2 | Arginine and proline metε  | HNSC | -0.078249482 |
| UPP2 | Arginine biosynthesis      | HNSC | -0.077108059 |
| UPP2 | Ascorbate and aldarate mε  | HNSC | 0.054030935  |
| UPP2 | Atypical memory b cell     | HNSC | -0.005184178 |
| UPP2 | Axl+siglec6+ dendritic ce  | HNSC | -0.005116219 |
| UPP2 | B cell                     | HNSC | -0.038531636 |
| UPP2 | B1 cell                    | HNSC | -0.070797991 |
| UPP2 | Basal cell                 | HNSC | -0.027134682 |
| UPP2 | Beta-alanine metabolism    | HNSC | -0.034997379 |
| UPP2 | Biosynthesis of unsaturate | HNSC | -0.128762792 |
| UPP2 | Biotin metabolism          | HNSC | -0.049813011 |

|      |                             |      |              |
|------|-----------------------------|------|--------------|
| UPP2 | Butanoate metabolism        | HNSC | -0.03381327  |
| UPP2 | Caffeine metabolism         | HNSC | -0.114893652 |
| UPP2 | Cancer stem cell            | HNSC | -0.009645183 |
| UPP2 | Cancer stem-like cell       | HNSC | 0.019550871  |
| UPP2 | Cd4+ cytotoxic t cell       | HNSC | -0.063896122 |
| UPP2 | Cd4+ memory t cell          | HNSC | -0.036310661 |
| UPP2 | Cd4+ regulatory t cell      | HNSC | -0.055090336 |
| UPP2 | Cd4+ t helper cell          | HNSC | -0.055122428 |
| UPP2 | Cd4+cd25+ regulatory t c    | HNSC | -0.057874296 |
| UPP2 | Cd8+ cytotoxic t cell       | HNSC | -0.063369967 |
| UPP2 | Cd8+ regulatory t cell      | HNSC | -0.071826218 |
| UPP2 | Cell_cycle                  | HNSC | -0.063405246 |
| UPP2 | Chandran_metastasis_top     | HNSC | -0.014547147 |
| UPP2 | Citrate cycle (tca cycle)   | HNSC | -0.093235443 |
| UPP2 | Cysteine and methionine r   | HNSC | -0.032800215 |
| UPP2 | Cytokine induced killer c   | HNSC | -0.033417883 |
| UPP2 | D-arginine and d-ornithin   | HNSC | -0.008505039 |
| UPP2 | D-glutamine and d-glutan    | HNSC | -0.028390103 |
| UPP2 | Dendritic cell              | HNSC | -0.055494143 |
| UPP2 | Dna_repair                  | HNSC | -0.039332192 |
| UPP2 | Dna_replication             | HNSC | -0.028613478 |
| UPP2 | Double-negative memory      | HNSC | 0.006700291  |
| UPP2 | Drug metabolism - cytoch    | HNSC | 0.087304156  |
| UPP2 | Drug metabolism - other     | HNSC | 0.008187033  |
| UPP2 | E2f_targets                 | HNSC | -0.06227053  |
| UPP2 | Ecm_receptor_interaction    | HNSC | -0.048179019 |
| UPP2 | Effector cd4+ memory t (    | HNSC | -0.067795486 |
| UPP2 | Effector cd8+ memory t (    | HNSC | -0.102893955 |
| UPP2 | Effector memory t cell      | HNSC | -0.059828548 |
| UPP2 | Effector regulatory t (treg | HNSC | -0.043994775 |
| UPP2 | Elvidge_hif1a_targets_up    | HNSC | -0.159463501 |
| UPP2 | Endothelial cell            | HNSC | -0.022740332 |
| UPP2 | Eosinophil                  | HNSC | -0.066698882 |
| UPP2 | Ether lipid metabolism      | HNSC | -0.068622288 |
| UPP2 | Exhausted cd4+ t cell       | HNSC | -0.067503635 |
| UPP2 | Exhausted cd8+ t cell       | HNSC | -0.057399702 |
| UPP2 | Exhausted t cell            | HNSC | -0.053585036 |
| UPP2 | Fat cell (adipocyte)        | HNSC | 0.068889785  |
| UPP2 | Fatty acid biosynthesis     | HNSC | -0.096444053 |
| UPP2 | Fatty acid degradation      | HNSC | -0.030144069 |
| UPP2 | Fatty acid elongation       | HNSC | -0.103127664 |
| UPP2 | Fibroblast                  | HNSC | -0.022009537 |
| UPP2 | Folate biosynthesis         | HNSC | -0.090149827 |

|      |                              |      |              |
|------|------------------------------|------|--------------|
| UPP2 | Follicular b cell            | HNSC | -0.032034967 |
| UPP2 | Follicular dendritic cell    | HNSC | -0.056868471 |
| UPP2 | Follicular helper (tfh) t ce | HNSC | -0.063871844 |
| UPP2 | Follicular t cell            | HNSC | -0.074744833 |
| UPP2 | Foxp3+il-17+ t cell          | HNSC | -0.094381315 |
| UPP2 | Fructose and mannose me      | HNSC | -0.071321907 |
| UPP2 | G2m_checkpoint               | HNSC | -0.091512098 |
| UPP2 | Galactose metabolism         | HNSC | -0.136185826 |
| UPP2 | Galie_tumor_stemness_ge      | HNSC | -0.059549843 |
| UPP2 | Glutathione metabolism       | HNSC | -0.031989355 |
| UPP2 | Glycerolipid metabolism      | HNSC | -0.020230337 |
| UPP2 | Glycerophospholipid metæ     | HNSC | 0.03491277   |
| UPP2 | Glycine, serine and threor   | HNSC | -0.033221244 |
| UPP2 | Glycolysis / gluconeogene    | HNSC | -0.072779947 |
| UPP2 | Glycosaminoglycan biosy      | HNSC | -0.037582165 |
| UPP2 | Glycosaminoglycan biosy      | HNSC | -0.04345706  |
| UPP2 | Glycosaminoglycan biosy      | HNSC | 0.023986868  |
| UPP2 | Glycosaminoglycan degra      | HNSC | -0.037753013 |
| UPP2 | Glycosphingolipid biosyn     | HNSC | 0.009430216  |
| UPP2 | Glycosphingolipid biosyn     | HNSC | -0.027730421 |
| UPP2 | Glycosphingolipid biosyn     | HNSC | -0.036401061 |
| UPP2 | Glycosylphosphatidylinos     | HNSC | 0.032284834  |
| UPP2 | Glyoxylate and dicarboxy     | HNSC | -0.030522908 |
| UPP2 | Granulocyte                  | HNSC | -0.066200513 |
| UPP2 | Hedgehog_signaling           | HNSC | -0.013350707 |
| UPP2 | Histidine metabolism         | HNSC | -0.021484119 |
| UPP2 | Hypoxia                      | HNSC | -0.019114992 |
| UPP2 | Il-17ralpha t cell           | HNSC | -0.063590596 |
| UPP2 | Il2_stat5_signaling          | HNSC | -0.112464025 |
| UPP2 | Il6_jak_stat3_signaling      | HNSC | -0.153225319 |
| UPP2 | Immune_checkpoints_tun       | HNSC | -0.110445839 |
| UPP2 | Immune_inhibition_cytok      | HNSC | -0.085825237 |
| UPP2 | Inositol phosphate metabo    | HNSC | -0.089414467 |
| UPP2 | Interleukin_6_signaling      | HNSC | -0.13753912  |
| UPP2 | Jaeger_metastasis_up         | HNSC | 0.000762958  |
| UPP2 | Jain_nfkb_signaling          | HNSC | -0.13331383  |
| UPP2 | Kras_signaling_up            | HNSC | -0.088707849 |
| UPP2 | Linoleic acid metabolism     | HNSC | 0.003874694  |
| UPP2 | Lipoic acid metabolism       | HNSC | 0.093680349  |
| UPP2 | Lysine degradation           | HNSC | -0.018789397 |
| UPP2 | Lysosome                     | HNSC | -0.095181553 |
| UPP2 | M1 macrophage                | HNSC | -0.070196213 |
| UPP2 | M2 macrophage                | HNSC | -0.066568496 |

|      |                             |      |              |
|------|-----------------------------|------|--------------|
| UPP2 | Mannose type o-glycan bi    | HNSC | 0.055574343  |
| UPP2 | Mapk_signaling_pathway      | HNSC | -0.060309648 |
| UPP2 | Mapk3_erk1_activation       | HNSC | -0.145502993 |
| UPP2 | Marginal zone b cell        | HNSC | -0.039332811 |
| UPP2 | Memory b cell               | HNSC | -0.032768306 |
| UPP2 | Mesenchymal cell            | HNSC | -0.011747695 |
| UPP2 | Mesenchymal stem cell       | HNSC | -0.032785585 |
| UPP2 | Metabolism of xenobiotic    | HNSC | 0.077756521  |
| UPP2 | Migrating cancer stem cel   | HNSC | -0.129455076 |
| UPP2 | Mitotic_spindle             | HNSC | -0.096494849 |
| UPP2 | Monocyte                    | HNSC | -0.074261973 |
| UPP2 | Mtor_signaling_pathway      | HNSC | -0.136904542 |
| UPP2 | Mtorc1_signaling            | HNSC | -0.128808564 |
| UPP2 | Mucin type o-glycan bios    | HNSC | -0.091365412 |
| UPP2 | Myc_targets_v1              | HNSC | -0.057846012 |
| UPP2 | Myeloid cell                | HNSC | -0.065416901 |
| UPP2 | N-glycan biosynthesis       | HNSC | -0.125625212 |
| UPP2 | Naive b cell                | HNSC | 0.009281251  |
| UPP2 | Naive cd4+ t cell           | HNSC | -0.083783335 |
| UPP2 | Naive cd8+ t cell           | HNSC | -0.072022213 |
| UPP2 | Natural killer cell         | HNSC | -0.066149869 |
| UPP2 | Natural killer t (nkt) cell | HNSC | -0.040912748 |
| UPP2 | Natural regulatory t (treg) | HNSC | -0.054224385 |
| UPP2 | Neomycin, kanamycin an      | HNSC | -0.040401873 |
| UPP2 | Neutrophil                  | HNSC | -0.060573787 |
| UPP2 | Nicotinate and nicotinami   | HNSC | -0.033846846 |
| UPP2 | Nitrogen metabolism         | HNSC | -0.077995262 |
| UPP2 | Nod_like_receptor_signal    | HNSC | -0.096752448 |
| UPP2 | Notch_signaling             | HNSC | -0.012897369 |
| UPP2 | One carbon pool by folate   | HNSC | -0.044580643 |
| UPP2 | Other glycan degradation    | HNSC | -0.006167946 |
| UPP2 | Other types of o-glycan b   | HNSC | 0.030054465  |
| UPP2 | Oxidative phosphorylatio    | HNSC | 0.010083319  |
| UPP2 | P53_pathway                 | HNSC | -0.08235953  |
| UPP2 | P53_signaling_pathway       | HNSC | -0.068400659 |
| UPP2 | Pantothenate and coa bios   | HNSC | -0.056956602 |
| UPP2 | Pentose and glucuronate i   | HNSC | 0.043324075  |
| UPP2 | Pentose phosphate pathwa    | HNSC | -0.103853065 |
| UPP2 | Pericyte                    | HNSC | -0.046727817 |
| UPP2 | Phenylalanine metabolism    | HNSC | 0.064010123  |
| UPP2 | Phenylalanine, tyrosine ar  | HNSC | 0.059759471  |
| UPP2 | Phosphonate and phosphir    | HNSC | 0.018790123  |
| UPP2 | Pi3k_akt_activation         | HNSC | -0.079119321 |

|      |                            |      |              |
|------|----------------------------|------|--------------|
| UPP2 | Pi3k_akt_mtor_signaling    | HNSC | -0.196700622 |
| UPP2 | Porphyrin and chlorophyll  | HNSC | 0.017479902  |
| UPP2 | Primary bile acid biosyntn | HNSC | 0.076531248  |
| UPP2 | Propanoate metabolism      | HNSC | -0.029295721 |
| UPP2 | Purine metabolism          | HNSC | -0.073755088 |
| UPP2 | Pyrimidine metabolism      | HNSC | -0.04940808  |
| UPP2 | Pyruvate metabolism        | HNSC | -0.045984704 |
| UPP2 | Regulation_of_autophagy    | HNSC | -0.010815521 |
| UPP2 | Retinol metabolism         | HNSC | 0.094606916  |
| UPP2 | Riboflavin metabolism      | HNSC | -0.049333706 |
| UPP2 | Schmahl_pdgf_signaling     | HNSC | -0.092106691 |
| UPP2 | Selenocompound metabol     | HNSC | -0.020139186 |
| UPP2 | Signaling_by_hippo         | HNSC | -0.065086738 |
| UPP2 | Sphingolipid metabolism    | HNSC | -0.166368953 |
| UPP2 | Starch and sucrose metabo  | HNSC | -0.078247942 |
| UPP2 | Steroid biosynthesis       | HNSC | -0.053444042 |
| UPP2 | Steroid hormone biosynth   | HNSC | 0.081541606  |
| UPP2 | Sulfur metabolism          | HNSC | 0.018453173  |
| UPP2 | Synthesis and degradation  | HNSC | -0.046543302 |
| UPP2 | T helper cell              | HNSC | -0.064470966 |
| UPP2 | T helper1 (th1) cell       | HNSC | -0.099564607 |
| UPP2 | T helper17 (th17) cell     | HNSC | -0.082784435 |
| UPP2 | T helper2 (th2) cell       | HNSC | -0.064860867 |
| UPP2 | T helper9 (th9) cell       | HNSC | -0.049005359 |
| UPP2 | Taurine and hypotaurine r  | HNSC | 0.102484444  |
| UPP2 | Terpenoid backbone biosy   | HNSC | -0.069159631 |
| UPP2 | Tgf_beta_signaling_pathw   | HNSC | -0.078287956 |
| UPP2 | Thiamine metabolism        | HNSC | -0.108218223 |
| UPP2 | Tnfa_signaling_via_nfkb    | HNSC | -0.068867858 |
| UPP2 | Tryptophan metabolism      | HNSC | -0.039552213 |
| UPP2 | Tumor endothelial cell     | HNSC | -0.027065067 |
| UPP2 | Tyrosine metabolism        | HNSC | 0.058406784  |
| UPP2 | Ubiquinone and other terf  | HNSC | -0.013807966 |
| UPP2 | Valine, leucine and isoleu | HNSC | -0.041738676 |
| UPP2 | Valine, leucine and isoleu | HNSC | -0.007648376 |
| UPP2 | Vascular endothelial cell  | HNSC | -0.053544632 |
| UPP2 | Vascular smooth muscle c   | HNSC | 0.033996726  |
| UPP2 | Vegf_signaling_pathway     | HNSC | -0.094635918 |
| UPP2 | Vitamin b6 metabolism      | HNSC | -0.039118634 |
| UPP2 | Willert_wnt_signaling      | HNSC | -0.048976444 |
| UPP2 | Wnt_beta_catenin_signali   | HNSC | -0.02481682  |
| CDA  | Abnormal plasma cell       | KICH | 0.259606351  |
| CDA  | Activated b cell           | KICH | -0.00555249  |

|     |                                      |      |              |
|-----|--------------------------------------|------|--------------|
| CDA | Activated cd4+ t cell                | KICH | -0.033035702 |
| CDA | Activated t cell                     | KICH | -0.015787344 |
| CDA | Alanine, aspartate and glu           | KICH | -0.187824544 |
| CDA | Alcala_apoptosis                     | KICH | -0.028109743 |
| CDA | Alpha-linolenic acid meta            | KICH | 0.022714071  |
| CDA | Amino sugar and nucleoti             | KICH | -0.014993663 |
| CDA | Ampk_pathway                         | KICH | 0.108680642  |
| CDA | Angiogenesis                         | KICH | 0.088211655  |
| CDA | Arachidonic acid metabol             | KICH | 0.161078072  |
| CDA | Arginine and proline metε            | KICH | -0.204421346 |
| CDA | Arginine biosynthesis                | KICH | -0.04763642  |
| CDA | Ascorbate and aldarate mε            | KICH | -0.273144292 |
| CDA | Atypical memory b cell               | KICH | 0.073477683  |
| CDA | Axl+siglec6+ dendritic ce            | KICH | 0.177752678  |
| CDA | B cell                               | KICH | -0.034317351 |
| CDA | B1 cell                              | KICH | 0.009238497  |
| CDA | Basal cell                           | KICH | 0.234550036  |
| CDA | Beta-alanine metabolism              | KICH | -0.220822811 |
| CDA | Biosynthesis of unsaturate           | KICH | 0.003075278  |
| CDA | Biotin metabolism                    | KICH | -0.47811066  |
| CDA | Butanoate metabolism                 | KICH | -0.184027053 |
| CDA | Caffeine metabolism                  | KICH | 0.132698848  |
| CDA | Cancer stem cell                     | KICH | 0.145420429  |
| CDA | Cancer stem-like cell                | KICH | 0.186203223  |
| CDA | Cd4+ cytotoxic t cell                | KICH | 0.140047387  |
| CDA | Cd4+ memory t cell                   | KICH | 0.042889622  |
| CDA | Cd4+ regulatory t cell               | KICH | -0.060649741 |
| CDA | Cd4+ t helper cell                   | KICH | 0.04675706   |
| CDA | Cd4+cd25+ regulatory t c             | KICH | 0.013162323  |
| CDA | Cd8+ cytotoxic t cell                | KICH | 0.105532077  |
| CDA | Cd8+ regulatory t cell               | KICH | 0.004553089  |
| CDA | Cell_cycle                           | KICH | -0.122504132 |
| CDA | Chandran_metastasis_top <sup>5</sup> | KICH | -0.16256193  |
| CDA | Citrate cycle (tca cycle)            | KICH | -0.26349109  |
| CDA | Cysteine and methionine r            | KICH | -0.11382041  |
| CDA | Cytokine induced killer cε           | KICH | 0.163909834  |
| CDA | D-arginine and d-ornithin            | KICH | 0.059994556  |
| CDA | D-glutamine and d-glutan             | KICH | -0.11025042  |
| CDA | Dendritic cell                       | KICH | 0.044804484  |
| CDA | Dna_repair                           | KICH | 0.074615028  |
| CDA | Dna_replication                      | KICH | -0.081169497 |
| CDA | Double-negative memory               | KICH | 0.212535239  |
| CDA | Drug metabolism - cytoch             | KICH | -0.120463926 |

|     |                                   |              |
|-----|-----------------------------------|--------------|
| CDA | Drug metabolism - other (KICH     | -0.104103746 |
| CDA | E2f_targets KICH                  | -0.101199588 |
| CDA | Ecm_receptor_interaction KICH     | 0.086409149  |
| CDA | Effector cd4+ memory t ( KICH     | 0.048938761  |
| CDA | Effector cd8+ memory t ( KICH     | 0.14897323   |
| CDA | Effector memory t cell KICH       | 0.102438962  |
| CDA | Effector regulatory t (treg KICH  | -0.051161787 |
| CDA | Elvidge_hif1a_targets_up KICH     | -0.275490542 |
| CDA | Endothelial cell KICH             | 0.094227448  |
| CDA | Eosinophil KICH                   | 0.036246864  |
| CDA | Ether lipid metabolism KICH       | 0.064606063  |
| CDA | Exhausted cd4+ t cell KICH        | 0.089894089  |
| CDA | Exhausted cd8+ t cell KICH        | 0.102224358  |
| CDA | Exhausted t cell KICH             | 0.057974889  |
| CDA | Fat cell (adipocyte) KICH         | -0.158311656 |
| CDA | Fatty acid biosynthesis KICH      | -0.053816625 |
| CDA | Fatty acid degradation KICH       | -0.28801354  |
| CDA | Fatty acid elongation KICH        | -0.067657011 |
| CDA | Fibroblast KICH                   | 0.170305948  |
| CDA | Folate biosynthesis KICH          | -0.114595912 |
| CDA | Follicular b cell KICH            | 0.218345356  |
| CDA | Follicular dendritic cell KICH    | 0.003087922  |
| CDA | Follicular helper (tfh) t ce KICH | 0.08290397   |
| CDA | Follicular t cell KICH            | -0.075204854 |
| CDA | Foxp3+il-17+ t cell KICH          | -0.035487295 |
| CDA | Fructose and mannose me KICH      | -0.169603922 |
| CDA | G2m_checkpoint KICH               | -0.06859679  |
| CDA | Galactose metabolism KICH         | -0.049927467 |
| CDA | Galie_tumor_stemness_ge KICH      | 0.009306685  |
| CDA | Glutathione metabolism KICH       | -0.321747843 |
| CDA | Glycerolipid metabolism KICH      | -0.049408134 |
| CDA | Glycerophospholipid metæ KICH     | 0.363022479  |
| CDA | Glycine, serine and threor KICH   | -0.25070436  |
| CDA | Glycolysis / gluconeogene KICH    | -0.257548064 |
| CDA | Glycosaminoglycan biosy1 KICH     | 0.195712785  |
| CDA | Glycosaminoglycan biosy1 KICH     | 0.08098289   |
| CDA | Glycosaminoglycan biosy1 KICH     | 0.39282195   |
| CDA | Glycosaminoglycan degra KICH      | -0.32747918  |
| CDA | Glycosphingolipid biosyn1 KICH    | 0.085475678  |
| CDA | Glycosphingolipid biosyn1 KICH    | 0.285722406  |
| CDA | Glycosphingolipid biosyn1 KICH    | 0.281127206  |
| CDA | Glycosylphosphatidylinos: KICH    | -0.324529121 |
| CDA | Glyoxylate and dicarboxy KICH     | -0.409420313 |

|     |                             |      |              |
|-----|-----------------------------|------|--------------|
| CDA | Granulocyte                 | KICH | 0.048883972  |
| CDA | Hedgehog_signaling          | KICH | 0.249526775  |
| CDA | Histidine metabolism        | KICH | -0.187888344 |
| CDA | Hypoxia                     | KICH | 0.189285434  |
| CDA | Il-17alpha t cell           | KICH | 0.041427296  |
| CDA | Il2_stat5_signaling         | KICH | 0.13292533   |
| CDA | Il6_jak_stat3_signaling     | KICH | 0.099085194  |
| CDA | Immune_checkpoints_tun      | KICH | -0.04002868  |
| CDA | Immune_inhibition_cytok     | KICH | 0.134764872  |
| CDA | Inositol phosphate metabo   | KICH | -0.115718986 |
| CDA | Interleukin_6_signaling     | KICH | -0.072747211 |
| CDA | Jaeger_metastasis_up        | KICH | -0.130675814 |
| CDA | Jain_nfkb_signaling         | KICH | -0.380244851 |
| CDA | Kras_signaling_up           | KICH | -0.063806922 |
| CDA | Linoleic acid metabolism    | KICH | 0.101707736  |
| CDA | Lipoic acid metabolism      | KICH | -0.226259724 |
| CDA | Lysine degradation          | KICH | -0.422593596 |
| CDA | Lysosome                    | KICH | -0.225597489 |
| CDA | M1 macrophage               | KICH | 0.000639285  |
| CDA | M2 macrophage               | KICH | -0.005989226 |
| CDA | Mannose type o-glycan bi    | KICH | 0.25699717   |
| CDA | Mapk_signaling_pathway      | KICH | 0.294730732  |
| CDA | Mapk3_erk1_activation       | KICH | 0.044677783  |
| CDA | Marginal zone b cell        | KICH | -0.00225935  |
| CDA | Memory b cell               | KICH | 0.152692305  |
| CDA | Mesenchymal cell            | KICH | 0.134209949  |
| CDA | Mesenchymal stem cell       | KICH | 0.180595611  |
| CDA | Metabolism of xenobiotic    | KICH | -0.117477609 |
| CDA | Migrating cancer stem cel   | KICH | -0.235261652 |
| CDA | Mitotic_spindle             | KICH | -0.108247876 |
| CDA | Monocyte                    | KICH | 0.056287299  |
| CDA | Mtor_signaling_pathway      | KICH | -0.004909219 |
| CDA | Mtorc1_signaling            | KICH | -0.154000686 |
| CDA | Mucin type o-glycan bios    | KICH | 0.295178225  |
| CDA | Myc_targets_v1              | KICH | -0.050806398 |
| CDA | Myeloid cell                | KICH | 0.03045396   |
| CDA | N-glycan biosynthesis       | KICH | -0.155939303 |
| CDA | Naive b cell                | KICH | -0.053114897 |
| CDA | Naive cd4+ t cell           | KICH | -0.008154254 |
| CDA | Naive cd8+ t cell           | KICH | 0.113052912  |
| CDA | Natural killer cell         | KICH | 0.060777391  |
| CDA | Natural killer t (nkt) cell | KICH | -0.112930498 |
| CDA | Natural regulatory t (treg) | KICH | -0.023987492 |



|     |                            |      |              |
|-----|----------------------------|------|--------------|
| CDA | Neomycin, kanamycin and    | KICH | 0.051790126  |
| CDA | Neutrophil                 | KICH | 0.092266012  |
| CDA | Nicotinate and nicotinami  | KICH | -0.135801279 |
| CDA | Nitrogen metabolism        | KICH | 0.192149598  |
| CDA | Nod_like_receptor_signal   | KICH | 0.089378268  |
| CDA | Notch_signaling            | KICH | 0.135051463  |
| CDA | One carbon pool by folate  | KICH | -0.222672086 |
| CDA | Other glycan degradation   | KICH | -0.32483192  |
| CDA | Other types of o-glycan b  | KICH | 0.248614678  |
| CDA | Oxidative phosphorylatio   | KICH | -0.185682814 |
| CDA | P53_pathway                | KICH | 0.062013028  |
| CDA | P53_signaling_pathway      | KICH | 0.08575815   |
| CDA | Pantothenate and coa bios  | KICH | -0.418817678 |
| CDA | Pentose and glucuronate i  | KICH | -0.286723025 |
| CDA | Pentose phosphate pathwa   | KICH | -0.222284354 |
| CDA | Pericyte                   | KICH | 0.262177473  |
| CDA | Phenylalanine metabolism   | KICH | 0.330763488  |
| CDA | Phenylalanine, tyrosine ar | KICH | 0.129277517  |
| CDA | Phosphonate and phosphir   | KICH | -0.085220558 |
| CDA | Pi3k_akt_activation        | KICH | -0.098235518 |
| CDA | Pi3k_akt_mtor_signaling    | KICH | -0.018862214 |
| CDA | Porphyrin and chlorophyl   | KICH | -0.322739885 |
| CDA | Primary bile acid biosynt  | KICH | -0.125349863 |
| CDA | Propanoate metabolism      | KICH | -0.352234254 |
| CDA | Purine metabolism          | KICH | -0.008498685 |
| CDA | Pyrimidine metabolism      | KICH | 0.107732361  |
| CDA | Pyruvate metabolism        | KICH | -0.344767598 |
| CDA | Regulation_of_autophagy    | KICH | -0.455654354 |
| CDA | Retinol metabolism         | KICH | 0.12911576   |
| CDA | Riboflavin metabolism      | KICH | -0.156225757 |
| CDA | Schmahl_pdgf_signaling     | KICH | -0.129766001 |
| CDA | Selenocompound metabol     | KICH | -0.057456161 |
| CDA | Signaling_by_hippo         | KICH | -0.072436845 |
| CDA | Sphingolipid metabolism    | KICH | -0.086296861 |
| CDA | Starch and sucrose metabo  | KICH | -0.234647859 |
| CDA | Steroid biosynthesis       | KICH | 0.043200864  |
| CDA | Steroid hormone biosynth   | KICH | 0.270219445  |
| CDA | Sulfur metabolism          | KICH | -0.252977246 |
| CDA | Synthesis and degradation  | KICH | -0.285966609 |
| CDA | T helper cell              | KICH | 0.06839635   |
| CDA | T helper1 (th1) cell       | KICH | 0.115170112  |
| CDA | T helper17 (th17) cell     | KICH | 0.021074632  |
| CDA | T helper2 (th2) cell       | KICH | -0.013362153 |

|      |                            |      |              |
|------|----------------------------|------|--------------|
| CDA  | T helper9 (th9) cell       | KICH | -0.058260268 |
| CDA  | Taurine and hypotaurine r  | KICH | -0.241587233 |
| CDA  | Terpenoid backbone biosy   | KICH | -0.224992089 |
| CDA  | Tgf_beta_signaling_pathw   | KICH | 0.206801345  |
| CDA  | Thiamine metabolism        | KICH | -0.212504328 |
| CDA  | Tnfa_signaling_via_nfkb    | KICH | 0.150661279  |
| CDA  | Tryptophan metabolism      | KICH | -0.087882545 |
| CDA  | Tumor endothelial cell     | KICH | 0.108006788  |
| CDA  | Tyrosine metabolism        | KICH | 0.159900918  |
| CDA  | Ubiquinone and other terf  | KICH | 0.071355996  |
| CDA  | Valine, leucine and isoleu | KICH | -0.009817019 |
| CDA  | Valine, leucine and isoleu | KICH | -0.391228787 |
| CDA  | Vascular endothelial cell  | KICH | 0.124794215  |
| CDA  | Vascular smooth muscle c   | KICH | 0.149745574  |
| CDA  | Vegf_signaling_pathway     | KICH | 0.332751632  |
| CDA  | Vitamin b6 metabolism      | KICH | -0.038977052 |
| CDA  | Willert_wnt_signaling      | KICH | -0.048831477 |
| CDA  | Wnt_beta_catenin_signali   | KICH | 0.291015348  |
| UCK1 | Abnormal plasma cell       | KICH | -0.167462361 |
| UCK1 | Activated b cell           | KICH | -0.221713226 |
| UCK1 | Activated cd4+ t cell      | KICH | -0.28431397  |
| UCK1 | Activated t cell           | KICH | -0.328828011 |
| UCK1 | Alanine, aspartate and glu | KICH | -0.350483702 |
| UCK1 | Alcala_apoptosis           | KICH | -0.289876045 |
| UCK1 | Alpha-linolenic acid meta  | KICH | 0.293992303  |
| UCK1 | Amino sugar and nucleoti   | KICH | -0.219579509 |
| UCK1 | Ampk_pathway               | KICH | 0.146135929  |
| UCK1 | Angiogenesis               | KICH | -0.354986139 |
| UCK1 | Arachidonic acid metabol:  | KICH | 0.311785127  |
| UCK1 | Arginine and proline metæ  | KICH | -0.120803396 |
| UCK1 | Arginine biosynthesis      | KICH | -0.171184469 |
| UCK1 | Ascorbate and aldarate mæ  | KICH | -0.304142254 |
| UCK1 | Atypical memory b cell     | KICH | -0.254700597 |
| UCK1 | Axl+siglec6+ dendritic ce  | KICH | -0.216803209 |
| UCK1 | B cell                     | KICH | -0.427119556 |
| UCK1 | B1 cell                    | KICH | -0.271155594 |
| UCK1 | Basal cell                 | KICH | -0.019997442 |
| UCK1 | Beta-alanine metabolism    | KICH | -0.154786833 |
| UCK1 | Biosynthesis of unsaturate | KICH | 0.118222893  |
| UCK1 | Biotin metabolism          | KICH | 0.161059703  |
| UCK1 | Butanoate metabolism       | KICH | 0.029141709  |
| UCK1 | Caffeine metabolism        | KICH | 0.061404334  |
| UCK1 | Cancer stem cell           | KICH | -0.343815212 |

|      |                              |      |              |
|------|------------------------------|------|--------------|
| UCK1 | Cancer stem-like cell        | KICH | -0.219938557 |
| UCK1 | Cd4+ cytotoxic t cell        | KICH | -0.111493639 |
| UCK1 | Cd4+ memory t cell           | KICH | -0.405947273 |
| UCK1 | Cd4+ regulatory t cell       | KICH | -0.1552176   |
| UCK1 | Cd4+ t helper cell           | KICH | -0.247411125 |
| UCK1 | Cd4+cd25+ regulatory t c     | KICH | -0.27654911  |
| UCK1 | Cd8+ cytotoxic t cell        | KICH | -0.217329967 |
| UCK1 | Cd8+ regulatory t cell       | KICH | -0.255302058 |
| UCK1 | Cell_cycle                   | KICH | -0.231395001 |
| UCK1 | Chandran_metastasis_top5     | KICH | -0.34289576  |
| UCK1 | Citrate cycle (tca cycle)    | KICH | -0.038163719 |
| UCK1 | Cysteine and methionine r    | KICH | -0.231145739 |
| UCK1 | Cytokine induced killer c    | KICH | -0.053479708 |
| UCK1 | D-arginine and d-ornithin    | KICH | 0.07760858   |
| UCK1 | D-glutamine and d-glutan     | KICH | -0.346841099 |
| UCK1 | Dendritic cell               | KICH | -0.223698877 |
| UCK1 | Dna_repair                   | KICH | 0.361484891  |
| UCK1 | Dna_replication              | KICH | -0.036206978 |
| UCK1 | Double-negative memory       | KICH | -0.357812123 |
| UCK1 | Drug metabolism - cytoch     | KICH | -0.10762816  |
| UCK1 | Drug metabolism - other c    | KICH | 0.006367101  |
| UCK1 | E2f_targets                  | KICH | -0.177060764 |
| UCK1 | Ecm_receptor_interaction     | KICH | -0.437421938 |
| UCK1 | Effector cd4+ memory t (     | KICH | -0.368717652 |
| UCK1 | Effector cd8+ memory t (     | KICH | -0.232193355 |
| UCK1 | Effector memory t cell       | KICH | -0.277453634 |
| UCK1 | Effector regulatory t (treg  | KICH | -0.297340775 |
| UCK1 | Elvidge_hif1a_targets_up     | KICH | -0.438275513 |
| UCK1 | Endothelial cell             | KICH | -0.325283921 |
| UCK1 | Eosinophil                   | KICH | -0.174328319 |
| UCK1 | Ether lipid metabolism       | KICH | -0.014672932 |
| UCK1 | Exhausted cd4+ t cell        | KICH | -0.42882478  |
| UCK1 | Exhausted cd8+ t cell        | KICH | -0.238670558 |
| UCK1 | Exhausted t cell             | KICH | -0.16051356  |
| UCK1 | Fat cell (adipocyte)         | KICH | 0.462677196  |
| UCK1 | Fatty acid biosynthesis      | KICH | -0.021325564 |
| UCK1 | Fatty acid degradation       | KICH | -0.0781327   |
| UCK1 | Fatty acid elongation        | KICH | 0.004677803  |
| UCK1 | Fibroblast                   | KICH | -0.310139408 |
| UCK1 | Folate biosynthesis          | KICH | 0.215553968  |
| UCK1 | Follicular b cell            | KICH | -0.273528561 |
| UCK1 | Follicular dendritic cell    | KICH | -0.178969879 |
| UCK1 | Follicular helper (tfh) t ce | KICH | -0.265959233 |

|      |                            |      |              |
|------|----------------------------|------|--------------|
| UCK1 | Follicular t cell          | KICH | 0.020052899  |
| UCK1 | Foxp3+il-17+ t cell        | KICH | 0.035651617  |
| UCK1 | Fructose and mannose me    | KICH | 0.158879642  |
| UCK1 | G2m_checkpoint             | KICH | -0.25772398  |
| UCK1 | Galactose metabolism       | KICH | -0.046926675 |
| UCK1 | Galie_tumor_stemness_ge    | KICH | -0.419105211 |
| UCK1 | Glutathione metabolism     | KICH | -0.148715352 |
| UCK1 | Glycerolipid metabolism    | KICH | -0.037151769 |
| UCK1 | Glycerophospholipid metæ   | KICH | 0.227445159  |
| UCK1 | Glycine, serine and threor | KICH | 0.039130873  |
| UCK1 | Glycolysis / gluconeogene  | KICH | -0.091055643 |
| UCK1 | Glycosaminoglycan biosyn   | KICH | 0.154012442  |
| UCK1 | Glycosaminoglycan biosyn   | KICH | 0.036300746  |
| UCK1 | Glycosaminoglycan biosyn   | KICH | 0.219408968  |
| UCK1 | Glycosaminoglycan degra    | KICH | 0.153772862  |
| UCK1 | Glycosphingolipid biosyn   | KICH | -0.039155733 |
| UCK1 | Glycosphingolipid biosyn   | KICH | 0.020736447  |
| UCK1 | Glycosphingolipid biosyn   | KICH | 0.118619909  |
| UCK1 | Glycosylphosphatidylinos   | KICH | 0.147484772  |
| UCK1 | Glyoxylate and dicarboxy   | KICH | -0.017549474 |
| UCK1 | Granulocyte                | KICH | -0.234884837 |
| UCK1 | Hedgehog_signaling         | KICH | -0.154502905 |
| UCK1 | Histidine metabolism       | KICH | -0.1525497   |
| UCK1 | Hypoxia                    | KICH | -0.165360764 |
| UCK1 | Il-17ralpha t cell         | KICH | -0.350964755 |
| UCK1 | Il2_stat5_signaling        | KICH | -0.338344553 |
| UCK1 | Il6_jak_stat3_signaling    | KICH | -0.297561431 |
| UCK1 | Immune_checkpoints_tun     | KICH | -0.218129218 |
| UCK1 | Immune_inhibition_cytok    | KICH | -0.083158924 |
| UCK1 | Inositol phosphate metabo  | KICH | -0.346874159 |
| UCK1 | Interleukin_6_signaling    | KICH | -0.578186082 |
| UCK1 | Jaeger_metastasis_up       | KICH | -0.249107529 |
| UCK1 | Jain_nfkb_signaling        | KICH | -0.2282355   |
| UCK1 | Kras_signaling_up          | KICH | -0.373944902 |
| UCK1 | Linoleic acid metabolism   | KICH | 0.357382346  |
| UCK1 | Lipoic acid metabolism     | KICH | 0.052637105  |
| UCK1 | Lysine degradation         | KICH | 0.046554441  |
| UCK1 | Lysosome                   | KICH | -0.169706677 |
| UCK1 | M1 macrophage              | KICH | -0.319046549 |
| UCK1 | M2 macrophage              | KICH | -0.236426023 |
| UCK1 | Mannose type o-glycan bi   | KICH | 0.446232113  |
| UCK1 | Mapk_signaling_pathway     | KICH | -0.347970715 |
| UCK1 | Mapk3_erk1_activation      | KICH | -0.630985535 |

|      |                                          |      |              |
|------|------------------------------------------|------|--------------|
| UCK1 | Marginal zone b cell                     | KICH | -0.453184284 |
| UCK1 | Memory b cell                            | KICH | -0.465471493 |
| UCK1 | Mesenchymal cell                         | KICH | -0.195136012 |
| UCK1 | Mesenchymal stem cell                    | KICH | -0.320630892 |
| UCK1 | Metabolism of xenobiotics                | KICH | 0.002954827  |
| UCK1 | Migrating cancer stem cell               | KICH | 0.03559112   |
| UCK1 | Mitotic_spindle                          | KICH | -0.623564931 |
| UCK1 | Monocyte                                 | KICH | -0.183347884 |
| UCK1 | Mtor_signaling_pathway                   | KICH | -0.381656136 |
| UCK1 | Mtorc1_signaling                         | KICH | -0.334156181 |
| UCK1 | Mucin type o-glycan biosynthesis         | KICH | -0.196317445 |
| UCK1 | Myc_targets_v1                           | KICH | -0.171896943 |
| UCK1 | Myeloid cell                             | KICH | -0.280222727 |
| UCK1 | N-glycan biosynthesis                    | KICH | 0.170854282  |
| UCK1 | Naive b cell                             | KICH | -0.195368777 |
| UCK1 | Naive cd4+ t cell                        | KICH | -0.304635441 |
| UCK1 | Naive cd8+ t cell                        | KICH | -0.170047342 |
| UCK1 | Natural killer cell                      | KICH | -0.214794792 |
| UCK1 | Natural killer t (nkt) cell              | KICH | -0.236413195 |
| UCK1 | Natural regulatory t (treg) cell         | KICH | -0.308630836 |
| UCK1 | Neomycin, kanamycin and streptomycin     | KICH | -0.181349907 |
| UCK1 | Neutrophil                               | KICH | -0.160882169 |
| UCK1 | Nicotinate and nicotinamide              | KICH | -0.234422006 |
| UCK1 | Nitrogen metabolism                      | KICH | -0.255966629 |
| UCK1 | Nod_like_receptor_signaling              | KICH | -0.454043612 |
| UCK1 | Notch_signaling                          | KICH | -0.049083869 |
| UCK1 | One carbon pool by folate                | KICH | -0.09389035  |
| UCK1 | Other glycan degradation                 | KICH | 0.141608914  |
| UCK1 | Other types of o-glycan biosynthesis     | KICH | 0.465248254  |
| UCK1 | Oxidative phosphorylation                | KICH | 0.355987691  |
| UCK1 | P53_pathway                              | KICH | -0.07403891  |
| UCK1 | P53_signaling_pathway                    | KICH | -0.425366036 |
| UCK1 | Pantothenate and coa biosynthesis        | KICH | -0.308379652 |
| UCK1 | Pentose and glucuronate interconversions | KICH | -0.394359089 |
| UCK1 | Pentose phosphate pathway                | KICH | 0.028300814  |
| UCK1 | Pericyte                                 | KICH | -0.148888511 |
| UCK1 | Phenylalanine metabolism                 | KICH | -0.080396389 |
| UCK1 | Phenylalanine, tyrosine and tryptophan   | KICH | 0.242143444  |
| UCK1 | Phosphonate and phosphite metabolism     | KICH | -0.110005768 |
| UCK1 | Pi3k_akt_activation                      | KICH | -0.459831302 |
| UCK1 | Pi3k_akt_mtor_signaling                  | KICH | -0.486608653 |
| UCK1 | Porphyrin and chlorophyll metabolism     | KICH | 0.169577998  |
| UCK1 | Primary bile acid biosynthesis           | KICH | 0.082198566  |

|      |                            |      |              |
|------|----------------------------|------|--------------|
| UCK1 | Propanoate metabolism      | KICH | -0.091763472 |
| UCK1 | Purine metabolism          | KICH | -0.304498576 |
| UCK1 | Pyrimidine metabolism      | KICH | -0.099366753 |
| UCK1 | Pyruvate metabolism        | KICH | 0.039523229  |
| UCK1 | Regulation_of_autophagy    | KICH | -0.119922085 |
| UCK1 | Retinol metabolism         | KICH | 0.139224205  |
| UCK1 | Riboflavin metabolism      | KICH | 0.321037689  |
| UCK1 | Schmahl_pdgf_signaling     | KICH | -0.148313772 |
| UCK1 | Selenocompound metabol     | KICH | -0.411840968 |
| UCK1 | Signaling_by_hippo         | KICH | -0.516055117 |
| UCK1 | Sphingolipid metabolism    | KICH | -0.345414751 |
| UCK1 | Starch and sucrose metabo  | KICH | -0.330305705 |
| UCK1 | Steroid biosynthesis       | KICH | 0.240379268  |
| UCK1 | Steroid hormone biosynth   | KICH | 0.003935271  |
| UCK1 | Sulfur metabolism          | KICH | -0.418903534 |
| UCK1 | Synthesis and degradation  | KICH | 0.055470881  |
| UCK1 | T helper cell              | KICH | -0.331317779 |
| UCK1 | T helper1 (th1) cell       | KICH | -0.271803324 |
| UCK1 | T helper17 (th17) cell     | KICH | -0.280809914 |
| UCK1 | T helper2 (th2) cell       | KICH | -0.206408266 |
| UCK1 | T helper9 (th9) cell       | KICH | -0.10457796  |
| UCK1 | Taurine and hypotaurine r  | KICH | 0.085134806  |
| UCK1 | Terpenoid backbone biosy   | KICH | -0.053877521 |
| UCK1 | Tgf_beta_signaling_pathw   | KICH | -0.461853508 |
| UCK1 | Thiamine metabolism        | KICH | -0.020349456 |
| UCK1 | Tnfa_signaling_via_nfbk    | KICH | -0.243779784 |
| UCK1 | Tryptophan metabolism      | KICH | -0.107848821 |
| UCK1 | Tumor endothelial cell     | KICH | -0.094292181 |
| UCK1 | Tyrosine metabolism        | KICH | -0.037226458 |
| UCK1 | Ubiquinone and other terf  | KICH | -0.267574629 |
| UCK1 | Valine, leucine and isoleu | KICH | 0.098550228  |
| UCK1 | Valine, leucine and isoleu | KICH | 0.003069398  |
| UCK1 | Vascular endothelial cell  | KICH | -0.165842693 |
| UCK1 | Vascular smooth muscle c   | KICH | -0.070170355 |
| UCK1 | Vegf_signaling_pathway     | KICH | -0.204331767 |
| UCK1 | Vitamin b6 metabolism      | KICH | 0.204442525  |
| UCK1 | Willert_wnt_signaling      | KICH | -0.20584753  |
| UCK1 | Wnt_beta_catenin_signali   | KICH | 0.083191405  |
| UCK2 | Abnormal plasma cell       | KICH | 0.196720603  |
| UCK2 | Activated b cell           | KICH | 0.54114089   |
| UCK2 | Activated cd4+ t cell      | KICH | 0.439743721  |
| UCK2 | Activated t cell           | KICH | 0.654832414  |
| UCK2 | Alanine, aspartate and glu | KICH | -0.127844042 |

|      |                            |      |              |
|------|----------------------------|------|--------------|
| UCK2 | Alcala_apoptosis           | KICH | 0.304401313  |
| UCK2 | Alpha-linolenic acid meta  | KICH | -0.325780119 |
| UCK2 | Amino sugar and nucleoti   | KICH | 0.233267117  |
| UCK2 | Ampk_pathway               | KICH | -0.157056296 |
| UCK2 | Angiogenesis               | KICH | 0.497616975  |
| UCK2 | Arachidonic acid metabol   | KICH | -0.062336185 |
| UCK2 | Arginine and proline metε  | KICH | 0.001328028  |
| UCK2 | Arginine biosynthesis      | KICH | -0.4239833   |
| UCK2 | Ascorbate and aldarate mε  | KICH | -0.194372162 |
| UCK2 | Atypical memory b cell     | KICH | 0.283548543  |
| UCK2 | Axl+siglec6+ dendritic ce  | KICH | 0.392111213  |
| UCK2 | B cell                     | KICH | 0.33837442   |
| UCK2 | B1 cell                    | KICH | 0.423863056  |
| UCK2 | Basal cell                 | KICH | 0.667111109  |
| UCK2 | Beta-alanine metabolism    | KICH | -0.107867495 |
| UCK2 | Biosynthesis of unsaturate | KICH | -0.287509636 |
| UCK2 | Biotin metabolism          | KICH | -0.382066463 |
| UCK2 | Butanoate metabolism       | KICH | -0.601866367 |
| UCK2 | Caffeine metabolism        | KICH | -0.174925444 |
| UCK2 | Cancer stem cell           | KICH | 0.324655192  |
| UCK2 | Cancer stem-like cell      | KICH | 0.230591265  |
| UCK2 | Cd4+ cytotoxic t cell      | KICH | 0.401224769  |
| UCK2 | Cd4+ memory t cell         | KICH | 0.471340588  |
| UCK2 | Cd4+ regulatory t cell     | KICH | 0.549390601  |
| UCK2 | Cd4+ t helper cell         | KICH | 0.470693204  |
| UCK2 | Cd4+cd25+ regulatory t c   | KICH | 0.482210788  |
| UCK2 | Cd8+ cytotoxic t cell      | KICH | 0.377663612  |
| UCK2 | Cd8+ regulatory t cell     | KICH | 0.55310185   |
| UCK2 | Cell_cycle                 | KICH | 0.396143298  |
| UCK2 | Chandran_metastasis_topε   | KICH | 0.059907325  |
| UCK2 | Citrate cycle (tca cycle)  | KICH | -0.546209219 |
| UCK2 | Cysteine and methionine r  | KICH | -0.015843656 |
| UCK2 | Cytokine induced killer cε | KICH | 0.272384519  |
| UCK2 | D-arginine and d-ornithin  | KICH | -0.083849323 |
| UCK2 | D-glutamine and d-glutan   | KICH | -0.485057427 |
| UCK2 | Dendritic cell             | KICH | 0.511061277  |
| UCK2 | Dna_repair                 | KICH | 0.180744142  |
| UCK2 | Dna_replication            | KICH | 0.46529107   |
| UCK2 | Double-negative memory     | KICH | 0.426191289  |
| UCK2 | Drug metabolism - cytoch   | KICH | -0.184081514 |
| UCK2 | Drug metabolism - other ε  | KICH | 0.145816861  |
| UCK2 | E2f_targets                | KICH | 0.510173285  |
| UCK2 | Ecm_receptor_interaction   | KICH | 0.325009362  |

|      |                                   |              |
|------|-----------------------------------|--------------|
| UCK2 | Effector cd4+ memory t ( KICH     | 0.387235829  |
| UCK2 | Effector cd8+ memory t ( KICH     | 0.532360807  |
| UCK2 | Effector memory t cell KICH       | 0.473921535  |
| UCK2 | Effector regulatory t (treg KICH  | 0.505252751  |
| UCK2 | Elvidge_hif1a_targets_up KICH     | 0.0449682    |
| UCK2 | Endothelial cell KICH             | 0.46035714   |
| UCK2 | Eosinophil KICH                   | 0.471019048  |
| UCK2 | Ether lipid metabolism KICH       | -0.35513717  |
| UCK2 | Exhausted cd4+ t cell KICH        | 0.524708801  |
| UCK2 | Exhausted cd8+ t cell KICH        | 0.531607424  |
| UCK2 | Exhausted t cell KICH             | 0.449342138  |
| UCK2 | Fat cell (adipocyte) KICH         | -0.300661622 |
| UCK2 | Fatty acid biosynthesis KICH      | -0.497083736 |
| UCK2 | Fatty acid degradation KICH       | -0.586341353 |
| UCK2 | Fatty acid elongation KICH        | -0.493447732 |
| UCK2 | Fibroblast KICH                   | 0.577273813  |
| UCK2 | Folate biosynthesis KICH          | -0.429431609 |
| UCK2 | Follicular b cell KICH            | 0.203413329  |
| UCK2 | Follicular dendritic cell KICH    | 0.3865223    |
| UCK2 | Follicular helper (tfh) t ce KICH | 0.611385049  |
| UCK2 | Follicular t cell KICH            | 0.42123252   |
| UCK2 | Foxp3+il-17+ t cell KICH          | 0.500707565  |
| UCK2 | Fructose and mannose me KICH      | 0.255932514  |
| UCK2 | G2m_checkpoint KICH               | 0.479021672  |
| UCK2 | Galactose metabolism KICH         | 0.186008136  |
| UCK2 | Galie_tumor_stemness_ge KICH      | 0.209620924  |
| UCK2 | Glutathione metabolism KICH       | 0.134833411  |
| UCK2 | Glycerolipid metabolism KICH      | 0.160624874  |
| UCK2 | Glycerophospholipid metæ KICH     | -0.141572401 |
| UCK2 | Glycine, serine and threor KICH   | 0.051520211  |
| UCK2 | Glycolysis / gluconeogene KICH    | -0.14661665  |
| UCK2 | Glycosaminoglycan biosy1 KICH     | 0.435979467  |
| UCK2 | Glycosaminoglycan biosy1 KICH     | 0.39508224   |
| UCK2 | Glycosaminoglycan biosy1 KICH     | 0.069691562  |
| UCK2 | Glycosaminoglycan degra KICH      | -0.307246408 |
| UCK2 | Glycosphingolipid biosyn1 KICH    | -0.124127235 |
| UCK2 | Glycosphingolipid biosyn1 KICH    | -0.086096278 |
| UCK2 | Glycosphingolipid biosyn1 KICH    | -0.106178736 |
| UCK2 | Glycosylphosphatidylinos: KICH    | -0.545428856 |
| UCK2 | Glyoxylate and dicarboxy KICH     | -0.322997549 |
| UCK2 | Granulocyte KICH                  | 0.533636563  |
| UCK2 | Hedgehog_signaling KICH           | -0.006210927 |
| UCK2 | Histidine metabolism KICH         | 0.06186985   |



|      |                             |      |              |
|------|-----------------------------|------|--------------|
| UCK2 | Hypoxia                     | KICH | 0.337180626  |
| UCK2 | Il-17alpha t cell           | KICH | 0.436295947  |
| UCK2 | Il2_stat5_signaling         | KICH | 0.438122157  |
| UCK2 | Il6_jak_stat3_signaling     | KICH | 0.537258998  |
| UCK2 | Immune_checkpoints_tun      | KICH | 0.446949661  |
| UCK2 | Immune_inhibition_cytok     | KICH | 0.321826266  |
| UCK2 | Inositol phosphate metabo   | KICH | -0.379698087 |
| UCK2 | Interleukin_6_signaling     | KICH | 0.272674605  |
| UCK2 | Jaeger_metastasis_up        | KICH | 0.405627824  |
| UCK2 | Jain_nfkb_signaling         | KICH | 0.060302723  |
| UCK2 | Kras_signaling_up           | KICH | 0.322450436  |
| UCK2 | Linoleic acid metabolism    | KICH | -0.383154654 |
| UCK2 | Lipoic acid metabolism      | KICH | -0.380147844 |
| UCK2 | Lysine degradation          | KICH | -0.28873053  |
| UCK2 | Lysosome                    | KICH | -0.23182546  |
| UCK2 | M1 macrophage               | KICH | 0.459392261  |
| UCK2 | M2 macrophage               | KICH | 0.490200241  |
| UCK2 | Mannose type o-glycan bi    | KICH | -0.149959964 |
| UCK2 | Mapk_signaling_pathway      | KICH | 0.356478744  |
| UCK2 | Mapk3_erk1_activation       | KICH | 0.088631103  |
| UCK2 | Marginal zone b cell        | KICH | 0.308486494  |
| UCK2 | Memory b cell               | KICH | 0.375215898  |
| UCK2 | Mesenchymal cell            | KICH | 0.732733563  |
| UCK2 | Mesenchymal stem cell       | KICH | 0.365221797  |
| UCK2 | Metabolism of xenobiotic    | KICH | -0.182563281 |
| UCK2 | Migrating cancer stem cel   | KICH | 0.094664983  |
| UCK2 | Mitotic_spindle             | KICH | 0.383296704  |
| UCK2 | Monocyte                    | KICH | 0.550082824  |
| UCK2 | Mtor_signaling_pathway      | KICH | -0.179998053 |
| UCK2 | Mtorc1_signaling            | KICH | 0.260411767  |
| UCK2 | Mucin type o-glycan biosy   | KICH | -0.308203787 |
| UCK2 | Myc_targets_v1              | KICH | 0.349815972  |
| UCK2 | Myeloid cell                | KICH | 0.430731496  |
| UCK2 | N-glycan biosynthesis       | KICH | -0.396743932 |
| UCK2 | Naive b cell                | KICH | -0.245497158 |
| UCK2 | Naive cd4+ t cell           | KICH | 0.25717791   |
| UCK2 | Naive cd8+ t cell           | KICH | -0.039817112 |
| UCK2 | Natural killer cell         | KICH | 0.387719371  |
| UCK2 | Natural killer t (nkt) cell | KICH | 0.403454158  |
| UCK2 | Natural regulatory t (treg) | KICH | 0.506409451  |
| UCK2 | Neomycin, kanamycin an      | KICH | 0.483721644  |
| UCK2 | Neutrophil                  | KICH | 0.495570284  |
| UCK2 | Nicotinate and nicotinami   | KICH | 0.299095375  |

|      |                            |      |              |
|------|----------------------------|------|--------------|
| UCK2 | Nitrogen metabolism        | KICH | -0.540989151 |
| UCK2 | Nod_like_receptor_signal   | KICH | 0.443537815  |
| UCK2 | Notch_signaling            | KICH | 0.110575519  |
| UCK2 | One carbon pool by folate  | KICH | 0.245202687  |
| UCK2 | Other glycan degradation   | KICH | -0.420180203 |
| UCK2 | Other types of o-glycan b  | KICH | 0.133797593  |
| UCK2 | Oxidative phosphorylatio   | KICH | -0.693141331 |
| UCK2 | P53_pathway                | KICH | 0.325050958  |
| UCK2 | P53_signaling_pathway      | KICH | 0.461585308  |
| UCK2 | Pantothenate and coa bios  | KICH | 0.151001507  |
| UCK2 | Pentose and glucuronate in | KICH | -0.087417081 |
| UCK2 | Pentose phosphate pathwa   | KICH | -0.217426109 |
| UCK2 | Pericyte                   | KICH | 0.444109321  |
| UCK2 | Phenylalanine metabolism   | KICH | 0.019267652  |
| UCK2 | Phenylalanine, tyrosine ar | KICH | -0.475294965 |
| UCK2 | Phosphonate and phosphir   | KICH | -0.345660638 |
| UCK2 | Pi3k_akt_activation        | KICH | 0.090169444  |
| UCK2 | Pi3k_akt_mtor_signaling    | KICH | 0.3680812    |
| UCK2 | Porphyrin and chlorophyl   | KICH | -0.352260405 |
| UCK2 | Primary bile acid biosynt  | KICH | -0.314647916 |
| UCK2 | Propanoate metabolism      | KICH | -0.591247976 |
| UCK2 | Purine metabolism          | KICH | 0.255805876  |
| UCK2 | Pyrimidine metabolism      | KICH | 0.350828581  |
| UCK2 | Pyruvate metabolism        | KICH | -0.516175236 |
| UCK2 | Regulation_of_autophagy    | KICH | -0.519779128 |
| UCK2 | Retinol metabolism         | KICH | -0.583358548 |
| UCK2 | Riboflavin metabolism      | KICH | 0.092713085  |
| UCK2 | Schmahl_pdgf_signaling     | KICH | -0.096523148 |
| UCK2 | Selenocompound metabol     | KICH | -0.122090361 |
| UCK2 | Signaling_by_hippo         | KICH | -0.189482821 |
| UCK2 | Sphingolipid metabolism    | KICH | -0.25827807  |
| UCK2 | Starch and sucrose metabo  | KICH | 0.171866296  |
| UCK2 | Steroid biosynthesis       | KICH | -0.447636213 |
| UCK2 | Steroid hormone biosynth   | KICH | -0.495471598 |
| UCK2 | Sulfur metabolism          | KICH | 0.203871541  |
| UCK2 | Synthesis and degradation  | KICH | -0.393179913 |
| UCK2 | T helper cell              | KICH | 0.474857145  |
| UCK2 | T helper1 (th1) cell       | KICH | 0.407981856  |
| UCK2 | T helper17 (th17) cell     | KICH | 0.480602258  |
| UCK2 | T helper2 (th2) cell       | KICH | 0.523112361  |
| UCK2 | T helper9 (th9) cell       | KICH | 0.282173878  |
| UCK2 | Taurine and hypotaurine r  | KICH | 0.174163054  |
| UCK2 | Terpenoid backbone biosy   | KICH | -0.223855699 |

|       |                            |      |              |
|-------|----------------------------|------|--------------|
| UCK2  | Tgf_beta_signaling_pathw   | KICH | 0.083678482  |
| UCK2  | Thiamine metabolism        | KICH | -0.077021935 |
| UCK2  | Tnfa_signaling_via_nfk     | KICH | 0.360674936  |
| UCK2  | Tryptophan metabolism      | KICH | -0.305365395 |
| UCK2  | Tumor endothelial cell     | KICH | 0.401220165  |
| UCK2  | Tyrosine metabolism        | KICH | -0.063936187 |
| UCK2  | Ubiquinone and other ter   | KICH | -0.394913156 |
| UCK2  | Valine, leucine and isoleu | KICH | 0.039534466  |
| UCK2  | Valine, leucine and isoleu | KICH | -0.532673761 |
| UCK2  | Vascular endothelial cell  | KICH | 0.092620879  |
| UCK2  | Vascular smooth muscle c   | KICH | 0.199707444  |
| UCK2  | Vegf_signaling_pathway     | KICH | 0.250709947  |
| UCK2  | Vitamin b6 metabolism      | KICH | 0.061782177  |
| UCK2  | Willert_wnt_signaling      | KICH | 0.474281193  |
| UCK2  | Wnt_beta_catenin_signali   | KICH | 0.231248069  |
| UCKL1 | Abnormal plasma cell       | KICH | -0.053247499 |
| UCKL1 | Activated b cell           | KICH | -0.064297999 |
| UCKL1 | Activated cd4+ t cell      | KICH | -0.125350338 |
| UCKL1 | Activated t cell           | KICH | -0.186524378 |
| UCKL1 | Alanine, aspartate and glu | KICH | -0.254570213 |
| UCKL1 | Alcala_apoptosis           | KICH | -0.007598435 |
| UCKL1 | Alpha-linolenic acid meta  | KICH | 0.230473617  |
| UCKL1 | Amino sugar and nucleoti   | KICH | -0.033904634 |
| UCKL1 | Ampk_pathway               | KICH | 0.079588089  |
| UCKL1 | Angiogenesis               | KICH | -0.21787828  |
| UCKL1 | Arachidonic acid metabo    | KICH | 0.281786576  |
| UCKL1 | Arginine and proline met   | KICH | -0.429353566 |
| UCKL1 | Arginine biosynthesis      | KICH | -0.114894527 |
| UCKL1 | Ascorbate and aldarate m   | KICH | -0.272826828 |
| UCKL1 | Atypical memory b cell     | KICH | 0.060906442  |
| UCKL1 | Axl+siglec6+ dendritic ce  | KICH | -0.04289271  |
| UCKL1 | B cell                     | KICH | -0.212411549 |
| UCKL1 | B1 cell                    | KICH | -0.135651275 |
| UCKL1 | Basal cell                 | KICH | 0.013268077  |
| UCKL1 | Beta-alanine metabolism    | KICH | -0.223010327 |
| UCKL1 | Biosynthesis of unsaturate | KICH | -0.083022518 |
| UCKL1 | Biotin metabolism          | KICH | -0.010191041 |
| UCKL1 | Butanoate metabolism       | KICH | -0.13328621  |
| UCKL1 | Caffeine metabolism        | KICH | 0.429506593  |
| UCKL1 | Cancer stem cell           | KICH | -0.067449219 |
| UCKL1 | Cancer stem-like cell      | KICH | 0.09124135   |
| UCKL1 | Cd4+ cytotoxic t cell      | KICH | 0.044891015  |
| UCKL1 | Cd4+ memory t cell         | KICH | -0.172310859 |

|       |                              |      |              |
|-------|------------------------------|------|--------------|
| UCKL1 | Cd4+ regulatory t cell       | KICH | -0.156475139 |
| UCKL1 | Cd4+ t helper cell           | KICH | -0.067914186 |
| UCKL1 | Cd4+cd25+ regulatory t c     | KICH | -0.092954042 |
| UCKL1 | Cd8+ cytotoxic t cell        | KICH | -0.047530866 |
| UCKL1 | Cd8+ regulatory t cell       | KICH | -0.086425424 |
| UCKL1 | Cell_cycle                   | KICH | -0.167897863 |
| UCKL1 | Chandran_metastasis_top      | KICH | -0.348579325 |
| UCKL1 | Citrate cycle (tca cycle)    | KICH | -0.088923454 |
| UCKL1 | Cysteine and methionine r    | KICH | -0.239622517 |
| UCKL1 | Cytokine induced killer c    | KICH | 0.034632993  |
| UCKL1 | D-arginine and d-ornithin    | KICH | -0.242426171 |
| UCKL1 | D-glutamine and d-glutan     | KICH | -0.199364261 |
| UCKL1 | Dendritic cell               | KICH | -0.057954061 |
| UCKL1 | Dna_repair                   | KICH | 0.133830758  |
| UCKL1 | Dna_replication              | KICH | -0.066055588 |
| UCKL1 | Double-negative memory       | KICH | 0.042051735  |
| UCKL1 | Drug metabolism - cytoch     | KICH | -0.007783245 |
| UCKL1 | Drug metabolism - other      | KICH | 0.142622919  |
| UCKL1 | E2f_targets                  | KICH | -0.143131647 |
| UCKL1 | Ecm_receptor_interaction     | KICH | -0.094974518 |
| UCKL1 | Effector cd4+ memory t (     | KICH | -0.052942119 |
| UCKL1 | Effector cd8+ memory t (     | KICH | -0.105001417 |
| UCKL1 | Effector memory t cell       | KICH | -0.048803375 |
| UCKL1 | Effector regulatory t (treg  | KICH | -0.202094155 |
| UCKL1 | Elvidge_hif1a_targets_up     | KICH | -0.379760388 |
| UCKL1 | Endothelial cell             | KICH | -0.043126413 |
| UCKL1 | Eosinophil                   | KICH | -0.082480895 |
| UCKL1 | Ether lipid metabolism       | KICH | 0.206437182  |
| UCKL1 | Exhausted cd4+ t cell        | KICH | -0.184348532 |
| UCKL1 | Exhausted cd8+ t cell        | KICH | -0.10970534  |
| UCKL1 | Exhausted t cell             | KICH | -0.048581479 |
| UCKL1 | Fat cell (adipocyte)         | KICH | 0.162288622  |
| UCKL1 | Fatty acid biosynthesis      | KICH | -0.014976198 |
| UCKL1 | Fatty acid degradation       | KICH | -0.12936365  |
| UCKL1 | Fatty acid elongation        | KICH | -0.038810242 |
| UCKL1 | Fibroblast                   | KICH | -0.059350108 |
| UCKL1 | Folate biosynthesis          | KICH | -0.063900676 |
| UCKL1 | Follicular b cell            | KICH | 0.158669463  |
| UCKL1 | Follicular dendritic cell    | KICH | -0.062780586 |
| UCKL1 | Follicular helper (tfh) t ce | KICH | -0.117874233 |
| UCKL1 | Follicular t cell            | KICH | -0.035386012 |
| UCKL1 | Foxp3+il-17+ t cell          | KICH | -0.159962284 |
| UCKL1 | Fructose and mannose me      | KICH | -0.106046593 |

|       |                            |      |              |
|-------|----------------------------|------|--------------|
| UCKL1 | G2m_checkpoint             | KICH | -0.154090226 |
| UCKL1 | Galactose metabolism       | KICH | -0.257296175 |
| UCKL1 | Galie_tumor_stemness_ge    | KICH | -0.218541673 |
| UCKL1 | Glutathione metabolism     | KICH | -0.259288256 |
| UCKL1 | Glycerolipid metabolism    | KICH | -0.267540013 |
| UCKL1 | Glycerophospholipid metæ   | KICH | 0.386738356  |
| UCKL1 | Glycine, serine and threor | KICH | -0.581342103 |
| UCKL1 | Glycolysis / gluconeogene  | KICH | -0.169240873 |
| UCKL1 | Glycosaminoglycan biosy    | KICH | 0.102617149  |
| UCKL1 | Glycosaminoglycan biosy    | KICH | -0.268195277 |
| UCKL1 | Glycosaminoglycan biosy    | KICH | 0.042327568  |
| UCKL1 | Glycosaminoglycan degra    | KICH | -0.038381837 |
| UCKL1 | Glycosphingolipid biosyn   | KICH | 0.086912568  |
| UCKL1 | Glycosphingolipid biosyn   | KICH | 0.058360658  |
| UCKL1 | Glycosphingolipid biosyn   | KICH | -0.013578857 |
| UCKL1 | Glycosylphosphatidylinos   | KICH | -0.005197967 |
| UCKL1 | Glyoxylate and dicarboxy   | KICH | -0.351065162 |
| UCKL1 | Granulocyte                | KICH | -0.107758039 |
| UCKL1 | Hedgehog_signaling         | KICH | 0.059866635  |
| UCKL1 | Histidine metabolism       | KICH | -0.294103323 |
| UCKL1 | Hypoxia                    | KICH | -0.075796223 |
| UCKL1 | Il-17alpha t cell          | KICH | -0.127317467 |
| UCKL1 | Il2_stat5_signaling        | KICH | -0.152751308 |
| UCKL1 | Il6_jak_stat3_signaling    | KICH | -0.094658061 |
| UCKL1 | Immune_checkpoints_tun     | KICH | -0.120260762 |
| UCKL1 | Immune_inhibition_cytok    | KICH | 0.147039034  |
| UCKL1 | Inositol phosphate metabo  | KICH | -0.16609428  |
| UCKL1 | Interleukin_6_signaling    | KICH | -0.276375448 |
| UCKL1 | Jaeger_metastasis_up       | KICH | -0.285601109 |
| UCKL1 | Jain_nfkb_signaling        | KICH | -0.014295511 |
| UCKL1 | Kras_signaling_up          | KICH | -0.219066153 |
| UCKL1 | Linoleic acid metabolism   | KICH | 0.345128181  |
| UCKL1 | Lipoic acid metabolism     | KICH | -0.040035142 |
| UCKL1 | Lysine degradation         | KICH | -0.301139725 |
| UCKL1 | Lysosome                   | KICH | -0.179233182 |
| UCKL1 | M1 macrophage              | KICH | -0.144681663 |
| UCKL1 | M2 macrophage              | KICH | -0.059812667 |
| UCKL1 | Mannose type o-glycan bi   | KICH | 0.126048645  |
| UCKL1 | Mapk_signaling_pathway     | KICH | -0.091601447 |
| UCKL1 | Mapk3_erk1_activation      | KICH | -0.193468435 |
| UCKL1 | Marginal zone b cell       | KICH | -0.207955222 |
| UCKL1 | Memory b cell              | KICH | 0.013524113  |
| UCKL1 | Mesenchymal cell           | KICH | -0.070061435 |

|       |                             |      |              |
|-------|-----------------------------|------|--------------|
| UCKL1 | Mesenchymal stem cell       | KICH | 0.016270427  |
| UCKL1 | Metabolism of xenobiotic    | KICH | 0.050812015  |
| UCKL1 | Migrating cancer stem cel   | KICH | -0.158065871 |
| UCKL1 | Mitotic_spindle             | KICH | -0.32724154  |
| UCKL1 | Monocyte                    | KICH | -0.110580634 |
| UCKL1 | Mtor_signaling_pathway      | KICH | -0.176303899 |
| UCKL1 | Mtorc1_signaling            | KICH | -0.365986573 |
| UCKL1 | Mucin type o-glycan bios    | KICH | 0.078929691  |
| UCKL1 | Myc_targets_v1              | KICH | 0.029446992  |
| UCKL1 | Myeloid cell                | KICH | -0.082700017 |
| UCKL1 | N-glycan biosynthesis       | KICH | -0.009392709 |
| UCKL1 | Naive b cell                | KICH | -0.002339245 |
| UCKL1 | Naive cd4+ t cell           | KICH | -0.066700107 |
| UCKL1 | Naive cd8+ t cell           | KICH | -0.03423435  |
| UCKL1 | Natural killer cell         | KICH | -0.103476288 |
| UCKL1 | Natural killer t (nkt) cell | KICH | -0.015670016 |
| UCKL1 | Natural regulatory t (treg) | KICH | -0.154225579 |
| UCKL1 | Neomycin, kanamycin an      | KICH | -0.101757359 |
| UCKL1 | Neutrophil                  | KICH | -0.110917051 |
| UCKL1 | Nicotinate and nicotinami   | KICH | -0.202000137 |
| UCKL1 | Nitrogen metabolism         | KICH | 0.044102035  |
| UCKL1 | Nod_like_receptor_signal    | KICH | -0.137991569 |
| UCKL1 | Notch_signaling             | KICH | -0.120501306 |
| UCKL1 | One carbon pool by folate   | KICH | -0.494096641 |
| UCKL1 | Other glycan degradation    | KICH | -0.049562469 |
| UCKL1 | Other types of o-glycan b   | KICH | 0.203717643  |
| UCKL1 | Oxidative phosphorylatio    | KICH | 0.08489478   |
| UCKL1 | P53_pathway                 | KICH | -0.109473483 |
| UCKL1 | P53_signaling_pathway       | KICH | -0.159682303 |
| UCKL1 | Pantothenate and coa bios   | KICH | -0.188827965 |
| UCKL1 | Pentose and glucuronate i   | KICH | -0.225283487 |
| UCKL1 | Pentose phosphate pathwa    | KICH | -0.089972406 |
| UCKL1 | Pericyte                    | KICH | 0.106669193  |
| UCKL1 | Phenylalanine metabolism    | KICH | 0.10738716   |
| UCKL1 | Phenylalanine, tyrosine ar  | KICH | 0.218034486  |
| UCKL1 | Phosphonate and phosphir    | KICH | -0.015261775 |
| UCKL1 | Pi3k_akt_activation         | KICH | -0.293841039 |
| UCKL1 | Pi3k_akt_mtor_signaling     | KICH | -0.236943094 |
| UCKL1 | Porphyrin and chlorophyl    | KICH | -0.06870727  |
| UCKL1 | Primary bile acid biosynt   | KICH | -0.155026555 |
| UCKL1 | Propanoate metabolism       | KICH | -0.202859074 |
| UCKL1 | Purine metabolism           | KICH | -0.087882849 |
| UCKL1 | Pyrimidine metabolism       | KICH | 0.008271216  |

|       |                            |      |              |
|-------|----------------------------|------|--------------|
| UCKL1 | Pyruvate metabolism        | KICH | -0.156849284 |
| UCKL1 | Regulation_of_autophagy    | KICH | -0.086040528 |
| UCKL1 | Retinol metabolism         | KICH | 0.192815852  |
| UCKL1 | Riboflavin metabolism      | KICH | 0.144690659  |
| UCKL1 | Schmahl_pdgf_signaling     | KICH | -0.290691088 |
| UCKL1 | Selenocompound metabol     | KICH | -0.200535771 |
| UCKL1 | Signaling_by_hippo         | KICH | -0.196278187 |
| UCKL1 | Sphingolipid metabolism    | KICH | -0.320563581 |
| UCKL1 | Starch and sucrose metabo  | KICH | -0.409899392 |
| UCKL1 | Steroid biosynthesis       | KICH | 0.164584007  |
| UCKL1 | Steroid hormone biosynth   | KICH | 0.286110876  |
| UCKL1 | Sulfur metabolism          | KICH | -0.318459869 |
| UCKL1 | Synthesis and degradation  | KICH | -0.192260531 |
| UCKL1 | T helper cell              | KICH | -0.157118569 |
| UCKL1 | T helper1 (th1) cell       | KICH | -0.152135591 |
| UCKL1 | T helper17 (th17) cell     | KICH | -0.184403229 |
| UCKL1 | T helper2 (th2) cell       | KICH | -0.141343663 |
| UCKL1 | T helper9 (th9) cell       | KICH | 0.026174321  |
| UCKL1 | Taurine and hypotaurine r  | KICH | -0.021911598 |
| UCKL1 | Terpenoid backbone biosy   | KICH | -0.289281016 |
| UCKL1 | Tgf_beta_signaling_pathw   | KICH | 0.013924257  |
| UCKL1 | Thiamine metabolism        | KICH | -0.121895062 |
| UCKL1 | Tnfa_signaling_via_nfk     | KICH | -0.058049881 |
| UCKL1 | Tryptophan metabolism      | KICH | -0.250340079 |
| UCKL1 | Tumor endothelial cell     | KICH | 0.103848476  |
| UCKL1 | Tyrosine metabolism        | KICH | -0.053278384 |
| UCKL1 | Ubiquinone and other ter   | KICH | -0.000680505 |
| UCKL1 | Valine, leucine and isoleu | KICH | 0.21288155   |
| UCKL1 | Valine, leucine and isoleu | KICH | -0.218729924 |
| UCKL1 | Vascular endothelial cell  | KICH | 0.084535728  |
| UCKL1 | Vascular smooth muscle c   | KICH | 0.096314603  |
| UCKL1 | Vegf_signaling_pathway     | KICH | 0.212131785  |
| UCKL1 | Vitamin b6 metabolism      | KICH | -0.334403776 |
| UCKL1 | Willert_wnt_signaling      | KICH | -0.056886764 |
| UCKL1 | Wnt_beta_catenin_signali   | KICH | 0.201428378  |
| UPP1  | Abnormal plasma cell       | KICH | -0.114239839 |
| UPP1  | Activated b cell           | KICH | -0.125737457 |
| UPP1  | Activated cd4+ t cell      | KICH | -0.127026596 |
| UPP1  | Activated t cell           | KICH | -0.217544868 |
| UPP1  | Alanine, aspartate and glu | KICH | -0.282912405 |
| UPP1  | Alcala_apoptosis           | KICH | -0.174093003 |
| UPP1  | Alpha-linolenic acid meta  | KICH | 0.430669723  |
| UPP1  | Amino sugar and nucleoti   | KICH | 0.022064196  |

|      |                            |      |              |
|------|----------------------------|------|--------------|
| UPP1 | Ampk_pathway               | KICH | 0.255691221  |
| UPP1 | Angiogenesis               | KICH | -0.100127243 |
| UPP1 | Arachidonic acid metabol   | KICH | 0.284721078  |
| UPP1 | Arginine and proline met   | KICH | -0.220078484 |
| UPP1 | Arginine biosynthesis      | KICH | -0.232816619 |
| UPP1 | Ascorbate and aldarate m   | KICH | -0.465053963 |
| UPP1 | Atypical memory b cell     | KICH | -0.036380413 |
| UPP1 | Axl+siglec6+ dendritic ce  | KICH | -0.173887943 |
| UPP1 | B cell                     | KICH | -0.186686199 |
| UPP1 | B1 cell                    | KICH | -0.161040996 |
| UPP1 | Basal cell                 | KICH | 0.037686479  |
| UPP1 | Beta-alanine metabolism    | KICH | -0.36777719  |
| UPP1 | Biosynthesis of unsaturate | KICH | 0.283223422  |
| UPP1 | Biotin metabolism          | KICH | 0.028641057  |
| UPP1 | Butanoate metabolism       | KICH | 0.056212607  |
| UPP1 | Caffeine metabolism        | KICH | 0.364173465  |
| UPP1 | Cancer stem cell           | KICH | 0.043825718  |
| UPP1 | Cancer stem-like cell      | KICH | 0.206213774  |
| UPP1 | Cd4+ cytotoxic t cell      | KICH | 0.018649467  |
| UPP1 | Cd4+ memory t cell         | KICH | -0.209069664 |
| UPP1 | Cd4+ regulatory t cell     | KICH | -0.198558938 |
| UPP1 | Cd4+ t helper cell         | KICH | -0.135534485 |
| UPP1 | Cd4+cd25+ regulatory t c   | KICH | -0.168346849 |
| UPP1 | Cd8+ cytotoxic t cell      | KICH | -0.103958335 |
| UPP1 | Cd8+ regulatory t cell     | KICH | -0.211424111 |
| UPP1 | Cell_cycle                 | KICH | -0.098638932 |
| UPP1 | Chandran_metastasis_top    | KICH | -0.206110326 |
| UPP1 | Citrate cycle (tca cycle)  | KICH | 0.091899831  |
| UPP1 | Cysteine and methionine r  | KICH | -0.225557096 |
| UPP1 | Cytokine induced killer c  | KICH | 0.038875625  |
| UPP1 | D-arginine and d-ornithin  | KICH | 0.103048202  |
| UPP1 | D-glutamine and d-glutan   | KICH | -0.227914875 |
| UPP1 | Dendritic cell             | KICH | -0.108121188 |
| UPP1 | Dna_repair                 | KICH | 0.190130072  |
| UPP1 | Dna_replication            | KICH | -0.03454544  |
| UPP1 | Double-negative memory     | KICH | -0.023577749 |
| UPP1 | Drug metabolism - cytoch   | KICH | -0.182117845 |
| UPP1 | Drug metabolism - other    | KICH | -0.045970987 |
| UPP1 | E2f_targets                | KICH | -0.089209337 |
| UPP1 | Ecm_receptor_interaction   | KICH | -0.041116655 |
| UPP1 | Effector cd4+ memory t (   | KICH | -0.177822236 |
| UPP1 | Effector cd8+ memory t (   | KICH | -0.102313265 |
| UPP1 | Effector memory t cell     | KICH | -0.075768031 |



|      |                              |      |              |
|------|------------------------------|------|--------------|
| UPP1 | Effector regulatory t (treg  | KICH | -0.207342815 |
| UPP1 | Elvidge_hif1a_targets_up     | KICH | -0.329941438 |
| UPP1 | Endothelial cell             | KICH | -0.098660402 |
| UPP1 | Eosinophil                   | KICH | -0.073797416 |
| UPP1 | Ether lipid metabolism       | KICH | 0.24245888   |
| UPP1 | Exhausted cd4+ t cell        | KICH | 0.022945272  |
| UPP1 | Exhausted cd8+ t cell        | KICH | 0.005483399  |
| UPP1 | Exhausted t cell             | KICH | -0.044340021 |
| UPP1 | Fat cell (adipocyte)         | KICH | 0.466037515  |
| UPP1 | Fatty acid biosynthesis      | KICH | 0.368308615  |
| UPP1 | Fatty acid degradation       | KICH | -0.054949256 |
| UPP1 | Fatty acid elongation        | KICH | 0.154648406  |
| UPP1 | Fibroblast                   | KICH | -0.022812822 |
| UPP1 | Folate biosynthesis          | KICH | 0.144623708  |
| UPP1 | Follicular b cell            | KICH | -0.02779051  |
| UPP1 | Follicular dendritic cell    | KICH | -0.229511298 |
| UPP1 | Follicular helper (tfh) t ce | KICH | -0.091417742 |
| UPP1 | Follicular t cell            | KICH | -0.087515904 |
| UPP1 | Foxp3+il-17+ t cell          | KICH | -0.166165941 |
| UPP1 | Fructose and mannose me      | KICH | 0.078801167  |
| UPP1 | G2m_checkpoint               | KICH | -0.127206271 |
| UPP1 | Galactose metabolism         | KICH | 0.033520366  |
| UPP1 | Galie_tumor_stemness_ge      | KICH | -0.369065119 |
| UPP1 | Glutathione metabolism       | KICH | -0.175917331 |
| UPP1 | Glycerolipid metabolism      | KICH | -0.207180595 |
| UPP1 | Glycerophospholipid metæ     | KICH | 0.406359222  |
| UPP1 | Glycine, serine and threor   | KICH | -0.200941131 |
| UPP1 | Glycolysis / gluconeogene    | KICH | 0.028742306  |
| UPP1 | Glycosaminoglycan biosy      | KICH | 0.148632657  |
| UPP1 | Glycosaminoglycan biosy      | KICH | -0.054428145 |
| UPP1 | Glycosaminoglycan biosy      | KICH | 0.439313801  |
| UPP1 | Glycosaminoglycan degra      | KICH | 0.193933659  |
| UPP1 | Glycosphingolipid biosyn     | KICH | 0.407895766  |
| UPP1 | Glycosphingolipid biosyn     | KICH | 0.311068754  |
| UPP1 | Glycosphingolipid biosyn     | KICH | 0.125500063  |
| UPP1 | Glycosylphosphatidylinos:    | KICH | -0.204314108 |
| UPP1 | Glyoxylate and dicarboxy     | KICH | -0.168650005 |
| UPP1 | Granulocyte                  | KICH | -0.093330996 |
| UPP1 | Hedgehog_signaling           | KICH | 0.128774995  |
| UPP1 | Histidine metabolism         | KICH | -0.448997047 |
| UPP1 | Hypoxia                      | KICH | 0.235548409  |
| UPP1 | Il-17ralpha t cell           | KICH | -0.154533276 |
| UPP1 | Il2_stat5_signaling          | KICH | -0.144951367 |

|      |                             |      |              |
|------|-----------------------------|------|--------------|
| UPP1 | Il6_jak_stat3_signaling     | KICH | -0.141201626 |
| UPP1 | Immune_checkpoints_tun      | KICH | 0.044135861  |
| UPP1 | Immune_inhibition_cytok     | KICH | 0.096457089  |
| UPP1 | Inositol phosphate metabo   | KICH | -0.033168155 |
| UPP1 | Interleukin_6_signaling     | KICH | -0.362728004 |
| UPP1 | Jaeger_metastasis_up        | KICH | 0.10669297   |
| UPP1 | Jain_nfkb_signaling         | KICH | -0.439925116 |
| UPP1 | Kras_signaling_up           | KICH | -0.123659118 |
| UPP1 | Linoleic acid metabolism    | KICH | 0.387252016  |
| UPP1 | Lipoic acid metabolism      | KICH | -0.167633887 |
| UPP1 | Lysine degradation          | KICH | -0.248464654 |
| UPP1 | Lysosome                    | KICH | -0.030288807 |
| UPP1 | M1 macrophage               | KICH | -0.123709983 |
| UPP1 | M2 macrophage               | KICH | -0.173651791 |
| UPP1 | Mannose type o-glycan bi    | KICH | 0.063344642  |
| UPP1 | Mapk_signaling_pathway      | KICH | 0.034265328  |
| UPP1 | Mapk3_erk1_activation       | KICH | -0.127357796 |
| UPP1 | Marginal zone b cell        | KICH | -0.319821586 |
| UPP1 | Memory b cell               | KICH | -0.12794783  |
| UPP1 | Mesenchymal cell            | KICH | 0.011129535  |
| UPP1 | Mesenchymal stem cell       | KICH | 0.037940038  |
| UPP1 | Metabolism of xenobiotic    | KICH | -0.045852625 |
| UPP1 | Migrating cancer stem cel   | KICH | -0.144243959 |
| UPP1 | Mitotic_spindle             | KICH | -0.449700222 |
| UPP1 | Monocyte                    | KICH | -0.091650084 |
| UPP1 | Mtor_signaling_pathway      | KICH | 0.013858992  |
| UPP1 | Mtorc1_signaling            | KICH | 0.08939275   |
| UPP1 | Mucin type o-glycan biosy   | KICH | 0.158909426  |
| UPP1 | Myc_targets_v1              | KICH | -0.083154134 |
| UPP1 | Myeloid cell                | KICH | -0.128920293 |
| UPP1 | N-glycan biosynthesis       | KICH | 0.158529998  |
| UPP1 | Naive b cell                | KICH | -0.026974162 |
| UPP1 | Naive cd4+ t cell           | KICH | -0.070600859 |
| UPP1 | Naive cd8+ t cell           | KICH | 0.043481637  |
| UPP1 | Natural killer cell         | KICH | -0.081786494 |
| UPP1 | Natural killer t (nkt) cell | KICH | -0.170548871 |
| UPP1 | Natural regulatory t (treg) | KICH | -0.185994012 |
| UPP1 | Neomycin, kanamycin and     | KICH | -0.044913058 |
| UPP1 | Neutrophil                  | KICH | -0.058188855 |
| UPP1 | Nicotinate and nicotinami   | KICH | -0.123885528 |
| UPP1 | Nitrogen metabolism         | KICH | -0.042453236 |
| UPP1 | Nod_like_receptor_signal    | KICH | -0.221377993 |
| UPP1 | Notch_signaling             | KICH | -0.041630775 |

|      |                            |      |              |
|------|----------------------------|------|--------------|
| UPP1 | One carbon pool by folate  | KICH | -0.305818216 |
| UPP1 | Other glycan degradation   | KICH | 0.037103508  |
| UPP1 | Other types of o-glycan b  | KICH | 0.265490214  |
| UPP1 | Oxidative phosphorylation  | KICH | 0.318294264  |
| UPP1 | P53_pathway                | KICH | -0.003533702 |
| UPP1 | P53_signaling_pathway      | KICH | 0.088170162  |
| UPP1 | Pantothenate and coa bios  | KICH | -0.253573291 |
| UPP1 | Pentose and glucuronate i  | KICH | -0.459409046 |
| UPP1 | Pentose phosphate pathwa   | KICH | 0.079497194  |
| UPP1 | Pericyte                   | KICH | 0.20086908   |
| UPP1 | Phenylalanine metabolism   | KICH | 0.159982416  |
| UPP1 | Phenylalanine, tyrosine ar | KICH | 0.318488851  |
| UPP1 | Phosphonate and phosphir   | KICH | -0.159911799 |
| UPP1 | Pi3k_akt_activation        | KICH | -0.347079886 |
| UPP1 | Pi3k_akt_mtor_signaling    | KICH | -0.149479601 |
| UPP1 | Porphyrin and chlorophyl   | KICH | -0.065714636 |
| UPP1 | Primary bile acid biosynt  | KICH | 0.097817371  |
| UPP1 | Propanoate metabolism      | KICH | -0.070838703 |
| UPP1 | Purine metabolism          | KICH | -0.188661629 |
| UPP1 | Pyrimidine metabolism      | KICH | 0.011046567  |
| UPP1 | Pyruvate metabolism        | KICH | -0.076029901 |
| UPP1 | Regulation_of_autophagy    | KICH | -0.16086753  |
| UPP1 | Retinol metabolism         | KICH | 0.392260875  |
| UPP1 | Riboflavin metabolism      | KICH | 0.000943113  |
| UPP1 | Schmahl_pdgf_signaling     | KICH | -0.220259154 |
| UPP1 | Selenocompound metabol     | KICH | -0.455174656 |
| UPP1 | Signaling_by_hippo         | KICH | -0.184928378 |
| UPP1 | Sphingolipid metabolism    | KICH | -0.129953907 |
| UPP1 | Starch and sucrose metabo  | KICH | -0.032652218 |
| UPP1 | Steroid biosynthesis       | KICH | 0.459624884  |
| UPP1 | Steroid hormone biosynth   | KICH | 0.39568837   |
| UPP1 | Sulfur metabolism          | KICH | -0.373750414 |
| UPP1 | Synthesis and degradation  | KICH | 0.018033228  |
| UPP1 | T helper cell              | KICH | -0.199794618 |
| UPP1 | T helper1 (th1) cell       | KICH | -0.14309317  |
| UPP1 | T helper17 (th17) cell     | KICH | -0.126287776 |
| UPP1 | T helper2 (th2) cell       | KICH | -0.217246333 |
| UPP1 | T helper9 (th9) cell       | KICH | -0.176870791 |
| UPP1 | Taurine and hypotaurine r  | KICH | -0.434492596 |
| UPP1 | Terpenoid backbone biosy   | KICH | -0.061503796 |
| UPP1 | Tgf_beta_signaling_pathw   | KICH | -0.08549473  |
| UPP1 | Thiamine metabolism        | KICH | -0.256848542 |
| UPP1 | Tnfa_signaling_via_nfkb    | KICH | -0.01754976  |

|      |                            |      |              |
|------|----------------------------|------|--------------|
| UPP1 | Tryptophan metabolism      | KICH | -0.063692957 |
| UPP1 | Tumor endothelial cell     | KICH | 0.028745429  |
| UPP1 | Tyrosine metabolism        | KICH | 0.163809873  |
| UPP1 | Ubiquinone and other ter   | KICH | 0.016385594  |
| UPP1 | Valine, leucine and isoleu | KICH | 0.280707694  |
| UPP1 | Valine, leucine and isoleu | KICH | -0.086885237 |
| UPP1 | Vascular endothelial cell  | KICH | 0.057960785  |
| UPP1 | Vascular smooth muscle c   | KICH | 0.02440096   |
| UPP1 | Vegf_signaling_pathway     | KICH | 0.171467772  |
| UPP1 | Vitamin b6 metabolism      | KICH | -0.038663139 |
| UPP1 | Willert_wnt_signaling      | KICH | -0.163452595 |
| UPP1 | Wnt_beta_catenin_signali   | KICH | 0.164233284  |
| UPP2 | Abnormal plasma cell       | KICH | 0.090081839  |
| UPP2 | Activated b cell           | KICH | -0.331184859 |
| UPP2 | Activated cd4+ t cell      | KICH | -0.329481247 |
| UPP2 | Activated t cell           | KICH | -0.344909453 |
| UPP2 | Alanine, aspartate and glu | KICH | 0.139830612  |
| UPP2 | Alcala_apoptosis           | KICH | -0.323554775 |
| UPP2 | Alpha-linolenic acid meta  | KICH | -0.071062572 |
| UPP2 | Amino sugar and nucleoti   | KICH | -0.269479347 |
| UPP2 | Ampk_pathway               | KICH | 0.067303228  |
| UPP2 | Angiogenesis               | KICH | -0.192030922 |
| UPP2 | Arachidonic acid metabol   | KICH | -0.22668214  |
| UPP2 | Arginine and proline met   | KICH | 0.21257808   |
| UPP2 | Arginine biosynthesis      | KICH | 0.20362967   |
| UPP2 | Ascorbate and aldarate m   | KICH | 0.388169992  |
| UPP2 | Atypical memory b cell     | KICH | -0.210060499 |
| UPP2 | Axl+siglec6+ dendritic ce  | KICH | -0.23693061  |
| UPP2 | B cell                     | KICH | -0.158800875 |
| UPP2 | B1 cell                    | KICH | -0.298664793 |
| UPP2 | Basal cell                 | KICH | -0.409289048 |
| UPP2 | Beta-alanine metabolism    | KICH | 0.176309661  |
| UPP2 | Biosynthesis of unsaturate | KICH | 0.064344598  |
| UPP2 | Biotin metabolism          | KICH | -0.077283021 |
| UPP2 | Butanoate metabolism       | KICH | 0.315467491  |
| UPP2 | Caffeine metabolism        | KICH | -0.01160861  |
| UPP2 | Cancer stem cell           | KICH | -0.199383509 |
| UPP2 | Cancer stem-like cell      | KICH | -0.251756089 |
| UPP2 | Cd4+ cytotoxic t cell      | KICH | -0.31336794  |
| UPP2 | Cd4+ memory t cell         | KICH | -0.247334136 |
| UPP2 | Cd4+ regulatory t cell     | KICH | -0.403844778 |
| UPP2 | Cd4+ t helper cell         | KICH | -0.31624773  |
| UPP2 | Cd4+cd25+ regulatory t c   | KICH | -0.323233541 |

|      |                              |      |              |
|------|------------------------------|------|--------------|
| UPP2 | Cd8+ cytotoxic t cell        | KICH | -0.205315693 |
| UPP2 | Cd8+ regulatory t cell       | KICH | -0.335441182 |
| UPP2 | Cell_cycle                   | KICH | -0.116864919 |
| UPP2 | Chandran_metastasis_top5     | KICH | 0.047886218  |
| UPP2 | Citrate cycle (tca cycle)    | KICH | 0.228380387  |
| UPP2 | Cysteine and methionine r    | KICH | 0.177107945  |
| UPP2 | Cytokine induced killer c    | KICH | -0.085664191 |
| UPP2 | D-arginine and d-ornithin    | KICH | 0.157534457  |
| UPP2 | D-glutamine and d-glutan     | KICH | 0.251923849  |
| UPP2 | Dendritic cell               | KICH | -0.31063227  |
| UPP2 | Dna_repair                   | KICH | -0.135157378 |
| UPP2 | Dna_replication              | KICH | -0.247612755 |
| UPP2 | Double-negative memory       | KICH | -0.207909312 |
| UPP2 | Drug metabolism - cytoch     | KICH | 0.182434805  |
| UPP2 | Drug metabolism - other c    | KICH | -0.037111351 |
| UPP2 | E2f_targets                  | KICH | -0.152569806 |
| UPP2 | Ecm_receptor_interaction     | KICH | -0.179461629 |
| UPP2 | Effector cd4+ memory t (     | KICH | -0.263161908 |
| UPP2 | Effector cd8+ memory t (     | KICH | -0.307613225 |
| UPP2 | Effector memory t cell       | KICH | -0.370654451 |
| UPP2 | Effector regulatory t (treg  | KICH | -0.314482427 |
| UPP2 | Elvidge_hif1a_targets_up     | KICH | -0.123371922 |
| UPP2 | Endothelial cell             | KICH | -0.30839406  |
| UPP2 | Eosinophil                   | KICH | -0.356371405 |
| UPP2 | Ether lipid metabolism       | KICH | 0.068550147  |
| UPP2 | Exhausted cd4+ t cell        | KICH | -0.274099378 |
| UPP2 | Exhausted cd8+ t cell        | KICH | -0.337668197 |
| UPP2 | Exhausted t cell             | KICH | -0.327476461 |
| UPP2 | Fat cell (adipocyte)         | KICH | -0.130051506 |
| UPP2 | Fatty acid biosynthesis      | KICH | 0.226035993  |
| UPP2 | Fatty acid degradation       | KICH | 0.255433674  |
| UPP2 | Fatty acid elongation        | KICH | 0.195533795  |
| UPP2 | Fibroblast                   | KICH | -0.354938401 |
| UPP2 | Folate biosynthesis          | KICH | 0.021421493  |
| UPP2 | Follicular b cell            | KICH | -0.102660189 |
| UPP2 | Follicular dendritic cell    | KICH | -0.276602183 |
| UPP2 | Follicular helper (tfh) t ce | KICH | -0.302964109 |
| UPP2 | Follicular t cell            | KICH | -0.317752883 |
| UPP2 | Foxp3+il-17+ t cell          | KICH | -0.322310176 |
| UPP2 | Fructose and mannose me      | KICH | -0.075502718 |
| UPP2 | G2m_checkpoint               | KICH | -0.146235629 |
| UPP2 | Galactose metabolism         | KICH | -0.113636066 |
| UPP2 | Galie_tumor_stemness_ge      | KICH | -0.044465121 |

|      |                                          |      |              |
|------|------------------------------------------|------|--------------|
| UPP2 | Glutathione metabolism                   | KICH | -0.063482656 |
| UPP2 | Glycerolipid metabolism                  | KICH | -0.042623785 |
| UPP2 | Glycerophospholipid metabolism           | KICH | -0.006151479 |
| UPP2 | Glycine, serine and threonine metabolism | KICH | 0.196047153  |
| UPP2 | Glycolysis / gluconeogenesis             | KICH | 0.098553825  |
| UPP2 | Glycosaminoglycan biosynthesis           | KICH | -0.383041522 |
| UPP2 | Glycosaminoglycan biosynthesis           | KICH | -0.236977793 |
| UPP2 | Glycosaminoglycan biosynthesis           | KICH | -0.299199921 |
| UPP2 | Glycosaminoglycan degradation            | KICH | -0.156306457 |
| UPP2 | Glycosphingolipid biosynthesis           | KICH | -0.366989709 |
| UPP2 | Glycosphingolipid biosynthesis           | KICH | -0.206084328 |
| UPP2 | Glycosphingolipid biosynthesis           | KICH | -0.116418657 |
| UPP2 | Glycosylphosphatidylinositol signaling   | KICH | 0.13025025   |
| UPP2 | Glyoxylate and dicarboxylate metabolism  | KICH | 0.151016778  |
| UPP2 | Granulocyte                              | KICH | -0.334468862 |
| UPP2 | Hedgehog signaling                       | KICH | 0.071406012  |
| UPP2 | Histidine metabolism                     | KICH | 0.153076429  |
| UPP2 | Hypoxia                                  | KICH | -0.222494858 |
| UPP2 | IL-17Ralpha T cell                       | KICH | -0.202458621 |
| UPP2 | IL2_stat5_signaling                      | KICH | -0.226045317 |
| UPP2 | IL6_jak_stat3_signaling                  | KICH | -0.29756262  |
| UPP2 | Immune checkpoints                       | KICH | -0.512888763 |
| UPP2 | Immune inhibition                        | KICH | -0.270342942 |
| UPP2 | Inositol phosphate metabolism            | KICH | 0.179089148  |
| UPP2 | Interleukin_6_signaling                  | KICH | 0.04205356   |
| UPP2 | Jaeger metastasis up                     | KICH | -0.248428584 |
| UPP2 | Jain_nfkB_signaling                      | KICH | 0.045696933  |
| UPP2 | Kras_signaling_up                        | KICH | -0.266486492 |
| UPP2 | Linoleic acid metabolism                 | KICH | -0.019118709 |
| UPP2 | Lipoic acid metabolism                   | KICH | 0.345226179  |
| UPP2 | Lysine degradation                       | KICH | 0.230701265  |
| UPP2 | Lysosome                                 | KICH | -0.065811963 |
| UPP2 | M1 macrophage                            | KICH | -0.264264939 |
| UPP2 | M2 macrophage                            | KICH | -0.311034217 |
| UPP2 | Mannose type O-glycan biosynthesis       | KICH | -0.104316343 |
| UPP2 | Mapk_signaling_pathway                   | KICH | -0.127144316 |
| UPP2 | Mapk3_erk1_activation                    | KICH | 0.149554925  |
| UPP2 | Marginal zone B cell                     | KICH | -0.022865865 |
| UPP2 | Memory B cell                            | KICH | -0.19378263  |
| UPP2 | Mesenchymal cell                         | KICH | -0.42272369  |
| UPP2 | Mesenchymal stem cell                    | KICH | -0.27007003  |
| UPP2 | Metabolism of xenobiotics                | KICH | 0.151806428  |
| UPP2 | Migrating cancer stem cell               | KICH | -0.229114924 |

|      |                                                   |      |              |
|------|---------------------------------------------------|------|--------------|
| UPP2 | Mitotic_spindle                                   | KICH | 0.066727589  |
| UPP2 | Monocyte                                          | KICH | -0.37740174  |
| UPP2 | Mtor_signaling_pathway                            | KICH | 0.201299918  |
| UPP2 | Mtorc1_signaling                                  | KICH | -0.086636169 |
| UPP2 | Mucin type o-glycan biosynthesis                  | KICH | 0.028732326  |
| UPP2 | Myc_targets_v1                                    | KICH | -0.116006448 |
| UPP2 | Myeloid cell                                      | KICH | -0.281570246 |
| UPP2 | N-glycan biosynthesis                             | KICH | -0.091053908 |
| UPP2 | Naive b cell                                      | KICH | 0.081246987  |
| UPP2 | Naive cd4+ t cell                                 | KICH | -0.245120725 |
| UPP2 | Naive cd8+ t cell                                 | KICH | -0.021828147 |
| UPP2 | Natural killer cell                               | KICH | -0.192814096 |
| UPP2 | Natural killer t (nkt) cell                       | KICH | -0.278588699 |
| UPP2 | Natural regulatory t (treg) cell                  | KICH | -0.358052489 |
| UPP2 | Neomycin, kanamycin and spectinomycin             | KICH | -0.147790566 |
| UPP2 | Neutrophil                                        | KICH | -0.353468831 |
| UPP2 | Nicotinate and nicotinamide metabolism            | KICH | -0.151556459 |
| UPP2 | Nitrogen metabolism                               | KICH | 0.184119131  |
| UPP2 | Nod_like_receptor_signaling                       | KICH | -0.145425226 |
| UPP2 | Notch_signaling                                   | KICH | -0.081183724 |
| UPP2 | One carbon pool by folate                         | KICH | 0.165689696  |
| UPP2 | Other glycan degradation                          | KICH | -0.117820419 |
| UPP2 | Other types of o-glycan biosynthesis              | KICH | -0.363081245 |
| UPP2 | Oxidative phosphorylation                         | KICH | 0.201279987  |
| UPP2 | P53_pathway                                       | KICH | -0.192602218 |
| UPP2 | P53_signaling_pathway                             | KICH | 0.00407779   |
| UPP2 | Pantothenate and coenzyme a biosynthesis          | KICH | -0.024392772 |
| UPP2 | Pentose and glucuronate interconversions          | KICH | 0.307659142  |
| UPP2 | Pentose phosphate pathway                         | KICH | 0.051589405  |
| UPP2 | Pericyte                                          | KICH | -0.325897938 |
| UPP2 | Phenylalanine metabolism                          | KICH | 0.121649261  |
| UPP2 | Phenylalanine, tyrosine and tryptophan metabolism | KICH | 0.144156627  |
| UPP2 | Phosphonate and phosphite metabolism              | KICH | 0.249805486  |
| UPP2 | Pi3k_akt_activation                               | KICH | 0.02040027   |
| UPP2 | Pi3k_akt_mtor_signaling                           | KICH | -0.201276152 |
| UPP2 | Porphyrin and chlorophyll metabolism              | KICH | 0.141842572  |
| UPP2 | Primary bile acid biosynthesis                    | KICH | 0.129445761  |
| UPP2 | Propanoate metabolism                             | KICH | 0.220321881  |
| UPP2 | Purine metabolism                                 | KICH | -0.051775717 |
| UPP2 | Pyrimidine metabolism                             | KICH | -0.088778559 |
| UPP2 | Pyruvate metabolism                               | KICH | 0.251398814  |
| UPP2 | Regulation_of_autophagy                           | KICH | 0.154158932  |
| UPP2 | Retinol metabolism                                | KICH | 0.276977928  |

|      |                                    |      |              |
|------|------------------------------------|------|--------------|
| UPP2 | Riboflavin metabolism              | KICH | -0.223709587 |
| UPP2 | Schmahl_pdgf_signaling             | KICH | 0.080730993  |
| UPP2 | Selenocompound metabolism          | KICH | 0.295499595  |
| UPP2 | Signaling_by_hippo                 | KICH | 0.197143462  |
| UPP2 | Sphingolipid metabolism            | KICH | 0.06615098   |
| UPP2 | Starch and sucrose metabolism      | KICH | -0.007244393 |
| UPP2 | Steroid biosynthesis               | KICH | -0.032400642 |
| UPP2 | Steroid hormone biosynthesis       | KICH | 0.312525666  |
| UPP2 | Sulfur metabolism                  | KICH | 0.075854168  |
| UPP2 | Synthesis and degradation          | KICH | 0.159110872  |
| UPP2 | T helper cell                      | KICH | -0.247985652 |
| UPP2 | T helper1 (th1) cell               | KICH | -0.188074085 |
| UPP2 | T helper17 (th17) cell             | KICH | -0.187558682 |
| UPP2 | T helper2 (th2) cell               | KICH | -0.197738101 |
| UPP2 | T helper9 (th9) cell               | KICH | -0.12005341  |
| UPP2 | Taurine and hypotaurine metabolism | KICH | -0.047413445 |
| UPP2 | Terpenoid backbone biosynthesis    | KICH | 0.246929865  |
| UPP2 | Tgf_beta_signaling_pathway         | KICH | 0.131008068  |
| UPP2 | Thiamine metabolism                | KICH | 0.090518821  |
| UPP2 | Tnfa_signaling_via_nfkB            | KICH | -0.200495979 |
| UPP2 | Tryptophan metabolism              | KICH | 0.214915447  |
| UPP2 | Tumor endothelial cell             | KICH | -0.140766672 |
| UPP2 | Tyrosine metabolism                | KICH | 0.195968662  |
| UPP2 | Ubiquinone and other terpenoids    | KICH | 0.527383786  |
| UPP2 | Valine, leucine and isoleucine     | KICH | -0.310897702 |
| UPP2 | Valine, leucine and isoleucine     | KICH | 0.188896832  |
| UPP2 | Vascular endothelial cell          | KICH | -0.21620229  |
| UPP2 | Vascular smooth muscle cell        | KICH | -0.115888761 |
| UPP2 | Vegf_signaling_pathway             | KICH | -0.192629774 |
| UPP2 | Vitamin b6 metabolism              | KICH | 0.012371921  |
| UPP2 | Willert_wnt_signaling              | KICH | -0.325355926 |
| UPP2 | Wnt_beta_catenin_signaling         | KICH | -0.128246886 |
| CDA  | Abnormal plasma cell               | KIRC | 0.08532682   |
| CDA  | Activated b cell                   | KIRC | -0.033895118 |
| CDA  | Activated cd4+ t cell              | KIRC | -0.080947588 |
| CDA  | Activated t cell                   | KIRC | -0.08322702  |
| CDA  | Alanine, aspartate and glutamate   | KIRC | -0.105349114 |
| CDA  | Alcala_apoptosis                   | KIRC | -0.041662079 |
| CDA  | Alpha-linolenic acid metabolism    | KIRC | 0.213128101  |
| CDA  | Amino sugar and nucleotide         | KIRC | -0.026164211 |
| CDA  | Ampk_pathway                       | KIRC | -0.014397799 |
| CDA  | Angiogenesis                       | KIRC | 0.229290719  |
| CDA  | Arachidonic acid metabolism        | KIRC | 0.215008486  |



|     |                                         |      |              |
|-----|-----------------------------------------|------|--------------|
| CDA | Arginine and proline metabolism         | KIRC | -0.01802673  |
| CDA | Arginine biosynthesis                   | KIRC | 0.06170027   |
| CDA | Ascorbate and aldarate metabolism       | KIRC | -0.162079266 |
| CDA | Atypical memory B cell                  | KIRC | -0.066560656 |
| CDA | Axl+siglec6+ dendritic cell             | KIRC | 0.056022649  |
| CDA | B cell                                  | KIRC | -0.096226004 |
| CDA | B1 cell                                 | KIRC | -0.02341312  |
| CDA | Basal cell                              | KIRC | 0.3752801    |
| CDA | Beta-alanine metabolism                 | KIRC | -0.085527798 |
| CDA | Biosynthesis of unsaturated fatty acids | KIRC | 0.07591537   |
| CDA | Biotin metabolism                       | KIRC | -0.043362654 |
| CDA | Butanoate metabolism                    | KIRC | -0.120935408 |
| CDA | Caffeine metabolism                     | KIRC | 0.121940853  |
| CDA | Cancer stem cell                        | KIRC | 0.042569135  |
| CDA | Cancer stem-like cell                   | KIRC | 0.043196002  |
| CDA | Cd4+ cytotoxic T cell                   | KIRC | 0.034290088  |
| CDA | Cd4+ memory T cell                      | KIRC | -0.080250284 |
| CDA | Cd4+ regulatory T cell                  | KIRC | -0.037914292 |
| CDA | Cd4+ T helper cell                      | KIRC | -0.084875953 |
| CDA | Cd4+cd25+ regulatory T cell             | KIRC | -0.084829914 |
| CDA | Cd8+ cytotoxic T cell                   | KIRC | -0.036524974 |
| CDA | Cd8+ regulatory T cell                  | KIRC | -0.094692169 |
| CDA | Cell cycle                              | KIRC | -0.089601101 |
| CDA | Chandran_metastasis_topology            | KIRC | -0.293519091 |
| CDA | Citrate cycle (TCA cycle)               | KIRC | -0.114835486 |
| CDA | Cysteine and methionine metabolism      | KIRC | -0.133516058 |
| CDA | Cytokine induced killer cell            | KIRC | 0.029689634  |
| CDA | D-arginine and D-ornithine              | KIRC | -0.061674636 |
| CDA | D-glutamine and D-glutamate             | KIRC | -0.258315373 |
| CDA | Dendritic cell                          | KIRC | -0.031008435 |
| CDA | DNA repair                              | KIRC | 0.172120365  |
| CDA | DNA replication                         | KIRC | -0.075391692 |
| CDA | Double-negative memory T cell           | KIRC | -0.024174946 |
| CDA | Drug metabolism - cytochrome P450       | KIRC | 0.005361756  |
| CDA | Drug metabolism - other                 | KIRC | 0.127933564  |
| CDA | E2F targets                             | KIRC | -0.122100024 |
| CDA | ECM_receptor_interaction                | KIRC | 0.178864822  |
| CDA | Effector CD4+ memory T cell             | KIRC | -0.134546542 |
| CDA | Effector CD8+ memory T cell             | KIRC | -0.009779235 |
| CDA | Effector memory T cell                  | KIRC | -0.088576841 |
| CDA | Effector regulatory T cell (Treg)       | KIRC | -0.0914679   |
| CDA | Elvidge_hif1a_targets_up                | KIRC | -0.126414008 |
| CDA | Endothelial cell                        | KIRC | 0.183277285  |

|     |                              |      |              |
|-----|------------------------------|------|--------------|
| CDA | Eosinophil                   | KIRC | -0.044986465 |
| CDA | Ether lipid metabolism       | KIRC | -0.024172215 |
| CDA | Exhausted cd4+ t cell        | KIRC | -0.07522317  |
| CDA | Exhausted cd8+ t cell        | KIRC | -0.014572073 |
| CDA | Exhausted t cell             | KIRC | -0.107097105 |
| CDA | Fat cell (adipocyte)         | KIRC | -0.025187897 |
| CDA | Fatty acid biosynthesis      | KIRC | 0.084293791  |
| CDA | Fatty acid degradation       | KIRC | -0.078622071 |
| CDA | Fatty acid elongation        | KIRC | 0.013232342  |
| CDA | Fibroblast                   | KIRC | 0.123184563  |
| CDA | Folate biosynthesis          | KIRC | 0.072340252  |
| CDA | Follicular b cell            | KIRC | -0.020776303 |
| CDA | Follicular dendritic cell    | KIRC | -0.055843754 |
| CDA | Follicular helper (tfh) t ce | KIRC | -0.110920737 |
| CDA | Follicular t cell            | KIRC | -0.079991479 |
| CDA | Foxp3+il-17+ t cell          | KIRC | 0.049770706  |
| CDA | Fructose and mannose me      | KIRC | -0.037997674 |
| CDA | G2m_checkpoint               | KIRC | -0.158560704 |
| CDA | Galactose metabolism         | KIRC | 0.043563638  |
| CDA | Galie_tumor_stemness_ge      | KIRC | 0.083525892  |
| CDA | Glutathione metabolism       | KIRC | 0.111731351  |
| CDA | Glycerolipid metabolism      | KIRC | -0.057476474 |
| CDA | Glycerophospholipid metæ     | KIRC | 0.112508012  |
| CDA | Glycine, serine and threor   | KIRC | -0.108379866 |
| CDA | Glycolysis / gluconeogene    | KIRC | -0.05880021  |
| CDA | Glycosaminoglycan biosy      | KIRC | 0.258978649  |
| CDA | Glycosaminoglycan biosy      | KIRC | 0.066549766  |
| CDA | Glycosaminoglycan biosy      | KIRC | 0.230347063  |
| CDA | Glycosaminoglycan degra      | KIRC | 0.104446535  |
| CDA | Glycosphingolipid biosyn     | KIRC | 0.183813298  |
| CDA | Glycosphingolipid biosyn     | KIRC | 0.127942278  |
| CDA | Glycosphingolipid biosyn     | KIRC | 0.095031269  |
| CDA | Glycosylphosphatidylinos:    | KIRC | -0.065113062 |
| CDA | Glyoxylate and dicarboxy     | KIRC | -0.122614352 |
| CDA | Granulocyte                  | KIRC | -0.063760545 |
| CDA | Hedgehog_signaling           | KIRC | -0.00816787  |
| CDA | Histidine metabolism         | KIRC | -0.102173327 |
| CDA | Hypoxia                      | KIRC | 0.231763012  |
| CDA | Il-17alpha t cell            | KIRC | -0.077219992 |
| CDA | Il2_stat5_signaling          | KIRC | 0.157542166  |
| CDA | Il6_jak_stat3_signaling      | KIRC | 0.047006858  |
| CDA | Immune_checkpoints_tun       | KIRC | -0.048274115 |
| CDA | Immune_inhibition_cytok      | KIRC | 0.100084175  |

|     |                             |      |              |
|-----|-----------------------------|------|--------------|
| CDA | Inositol phosphate metabo   | KIRC | -0.200346386 |
| CDA | Interleukin_6_signaling     | KIRC | -0.17496659  |
| CDA | Jaeger_metastasis_up        | KIRC | 0.034360982  |
| CDA | Jain_nfkb_signaling         | KIRC | -0.230771254 |
| CDA | Kras_signaling_up           | KIRC | 0.060096708  |
| CDA | Linoleic acid metabolism    | KIRC | 0.145953382  |
| CDA | Lipoic acid metabolism      | KIRC | 0.013841291  |
| CDA | Lysine degradatation        | KIRC | -0.262573154 |
| CDA | Lysosome                    | KIRC | -0.053154344 |
| CDA | M1 macrophage               | KIRC | -0.069897527 |
| CDA | M2 macrophage               | KIRC | -0.065056254 |
| CDA | Mannose type o-glycan bi    | KIRC | -0.025486975 |
| CDA | Mapk_signaling_pathway      | KIRC | 0.074053854  |
| CDA | Mapk3_erk1_activation       | KIRC | -0.100977186 |
| CDA | Marginal zone b cell        | KIRC | -0.036479185 |
| CDA | Memory b cell               | KIRC | -0.113668746 |
| CDA | Mesenchymal cell            | KIRC | 0.182727499  |
| CDA | Mesenchymal stem cell       | KIRC | 0.081359077  |
| CDA | Metabolism of xenobiotic    | KIRC | 0.040698713  |
| CDA | Migrating cancer stem cel   | KIRC | 0.135740656  |
| CDA | Mitotic_spindle             | KIRC | -0.193610864 |
| CDA | Monocyte                    | KIRC | 0.058327001  |
| CDA | Mtor_signaling_pathway      | KIRC | -0.071913552 |
| CDA | Mtorc1_signaling            | KIRC | 0.005215189  |
| CDA | Mucin type o-glycan biosy   | KIRC | -0.101115112 |
| CDA | Myc_targets_v1              | KIRC | 0.082258542  |
| CDA | Myeloid cell                | KIRC | -0.097583379 |
| CDA | N-glycan biosynthesis       | KIRC | 0.049461241  |
| CDA | Naive b cell                | KIRC | -0.07273452  |
| CDA | Naive cd4+ t cell           | KIRC | 0.04664553   |
| CDA | Naive cd8+ t cell           | KIRC | 0.035906379  |
| CDA | Natural killer cell         | KIRC | -0.027024002 |
| CDA | Natural killer t (nkt) cell | KIRC | 0.049319065  |
| CDA | Natural regulatory t (treg) | KIRC | -0.133725616 |
| CDA | Neomycin, kanamycin an      | KIRC | 0.083624233  |
| CDA | Neutrophil                  | KIRC | 0.099814993  |
| CDA | Nicotinate and nicotinami   | KIRC | -0.185047296 |
| CDA | Nitrogen metabolism         | KIRC | 0.144432794  |
| CDA | Nod_like_receptor_signal    | KIRC | -0.095860591 |
| CDA | Notch_signaling             | KIRC | 0.176073861  |
| CDA | One carbon pool by folate   | KIRC | -0.193819735 |
| CDA | Other glycan degradatation  | KIRC | -0.16666967  |
| CDA | Other types of o-glycan b   | KIRC | 0.087702629  |

|     |                                                   |      |              |
|-----|---------------------------------------------------|------|--------------|
| CDA | Oxidative phosphorylation                         | KIRC | 0.149115271  |
| CDA | P53_pathway                                       | KIRC | 0.273202422  |
| CDA | P53_signaling_pathway                             | KIRC | -0.010179367 |
| CDA | Pantothenate and coa biosynthesis                 | KIRC | -0.144475649 |
| CDA | Pentose and glucuronate interconversions          | KIRC | -0.137998443 |
| CDA | Pentose phosphate pathway                         | KIRC | 0.048607254  |
| CDA | Pericyte                                          | KIRC | 0.158244403  |
| CDA | Phenylalanine metabolism                          | KIRC | 0.084996756  |
| CDA | Phenylalanine, tyrosine and tryptophan metabolism | KIRC | -0.029579957 |
| CDA | Phosphonate and phosphoric acid metabolism        | KIRC | -0.128547395 |
| CDA | Pi3k_akt_activation                               | KIRC | 0.01771278   |
| CDA | Pi3k_akt_mtor_signaling                           | KIRC | 0.061799952  |
| CDA | Porphyrin and chlorophyll metabolism              | KIRC | -0.072793844 |
| CDA | Primary bile acid biosynthesis                    | KIRC | 0.129181256  |
| CDA | Propanoate metabolism                             | KIRC | -0.223306206 |
| CDA | Purine metabolism                                 | KIRC | 0.164523798  |
| CDA | Pyrimidine metabolism                             | KIRC | 0.090603311  |
| CDA | Pyruvate metabolism                               | KIRC | -0.101470741 |
| CDA | Regulation_of_autophagy                           | KIRC | -0.043495845 |
| CDA | Retinol metabolism                                | KIRC | 0.019423301  |
| CDA | Riboflavin metabolism                             | KIRC | 0.047362472  |
| CDA | Schmahl_pdgf_signaling                            | KIRC | -0.038348976 |
| CDA | Selenocompound metabolism                         | KIRC | -0.170851082 |
| CDA | Signaling_by_hippo                                | KIRC | -0.215460352 |
| CDA | Sphingolipid metabolism                           | KIRC | -0.270088498 |
| CDA | Starch and sucrose metabolism                     | KIRC | -0.022598942 |
| CDA | Steroid biosynthesis                              | KIRC | 0.06360605   |
| CDA | Steroid hormone biosynthesis                      | KIRC | 0.070462926  |
| CDA | Sulfur metabolism                                 | KIRC | 0.051224139  |
| CDA | Synthesis and degradation of ribonucleotides      | KIRC | -0.123322476 |
| CDA | T helper cell                                     | KIRC | -0.066227299 |
| CDA | T helper1 (th1) cell                              | KIRC | -0.088761652 |
| CDA | T helper17 (th17) cell                            | KIRC | -0.038923397 |
| CDA | T helper2 (th2) cell                              | KIRC | -0.068642093 |
| CDA | T helper9 (th9) cell                              | KIRC | -0.030828568 |
| CDA | Taurine and hypotaurine metabolism                | KIRC | 0.192622953  |
| CDA | Terpenoid backbone biosynthesis                   | KIRC | -0.041782992 |
| CDA | Tgf_beta_signaling_pathway                        | KIRC | 0.000594603  |
| CDA | Thiamine metabolism                               | KIRC | 0.037250321  |
| CDA | Tnfa_signaling_via_nfkB                           | KIRC | 0.144333129  |
| CDA | Tryptophan metabolism                             | KIRC | -0.070584317 |
| CDA | Tumor endothelial cell                            | KIRC | 0.249759563  |
| CDA | Tyrosine metabolism                               | KIRC | 0.16429472   |

|      |                            |      |              |
|------|----------------------------|------|--------------|
| CDA  | Ubiquinone and other ter   | KIRC | 0.106427713  |
| CDA  | Valine, leucine and isoleu | KIRC | 0.038806991  |
| CDA  | Valine, leucine and isoleu | KIRC | -0.17752038  |
| CDA  | Vascular endothelial cell  | KIRC | 0.208916546  |
| CDA  | Vascular smooth muscle c   | KIRC | 0.19049979   |
| CDA  | Vegf_signaling_pathway     | KIRC | 0.21494634   |
| CDA  | Vitamin b6 metabolism      | KIRC | -0.057518932 |
| CDA  | Willert_wnt_signaling      | KIRC | 0.206451262  |
| CDA  | Wnt_beta_catenin_signali   | KIRC | 0.155398234  |
| UCK1 | Abnormal plasma cell       | KIRC | -0.184852911 |
| UCK1 | Activated b cell           | KIRC | -0.201508749 |
| UCK1 | Activated cd4+ t cell      | KIRC | -0.33778925  |
| UCK1 | Activated t cell           | KIRC | -0.174865648 |
| UCK1 | Alanine, aspartate and glu | KIRC | -0.126381235 |
| UCK1 | Alcala_apoptosis           | KIRC | 0.072918341  |
| UCK1 | Alpha-linolenic acid meta  | KIRC | 0.102926666  |
| UCK1 | Amino sugar and nucleoti   | KIRC | -0.021685493 |
| UCK1 | Ampk_pathway               | KIRC | 0.063436816  |
| UCK1 | Angiogenesis               | KIRC | -0.193334755 |
| UCK1 | Arachidonic acid metabo    | KIRC | 0.093434764  |
| UCK1 | Arginine and proline met   | KIRC | 0.074601829  |
| UCK1 | Arginine biosynthesis      | KIRC | 0.037280622  |
| UCK1 | Ascorbate and aldarate m   | KIRC | -0.036725579 |
| UCK1 | Atypical memory b cell     | KIRC | -0.064271482 |
| UCK1 | Ax1+siglec6+ dendritic ce  | KIRC | -0.339042489 |
| UCK1 | B cell                     | KIRC | -0.266695129 |
| UCK1 | B1 cell                    | KIRC | -0.116307184 |
| UCK1 | Basal cell                 | KIRC | 0.038357417  |
| UCK1 | Beta-alanine metabolism    | KIRC | 0.083929442  |
| UCK1 | Biosynthesis of unsaturate | KIRC | 0.141604131  |
| UCK1 | Biotin metabolism          | KIRC | -0.038232755 |
| UCK1 | Butanoate metabolism       | KIRC | 0.099122208  |
| UCK1 | Caffeine metabolism        | KIRC | 0.038883127  |
| UCK1 | Cancer stem cell           | KIRC | -0.38926626  |
| UCK1 | Cancer stem-like cell      | KIRC | -0.218348609 |
| UCK1 | Cd4+ cytotoxic t cell      | KIRC | -0.089670583 |
| UCK1 | Cd4+ memory t cell         | KIRC | -0.161490923 |
| UCK1 | Cd4+ regulatory t cell     | KIRC | -0.282534402 |
| UCK1 | Cd4+ t helper cell         | KIRC | -0.170330958 |
| UCK1 | Cd4+cd25+ regulatory t c   | KIRC | -0.20723217  |
| UCK1 | Cd8+ cytotoxic t cell      | KIRC | -0.036251965 |
| UCK1 | Cd8+ regulatory t cell     | KIRC | -0.174111212 |
| UCK1 | Cell_cycle                 | KIRC | -0.255334616 |

|      |                             |      |              |
|------|-----------------------------|------|--------------|
| UCK1 | Chandran_metastasis_top     | KIRC | -0.368273724 |
| UCK1 | Citrate cycle (tca cycle)   | KIRC | 0.120264026  |
| UCK1 | Cysteine and methionine     | KIRC | -0.019767373 |
| UCK1 | Cytokine induced killer     | KIRC | -0.133905688 |
| UCK1 | D-arginine and d-ornithin   | KIRC | 0.07319554   |
| UCK1 | D-glutamine and d-glutan    | KIRC | -0.138235282 |
| UCK1 | Dendritic cell              | KIRC | -0.317712321 |
| UCK1 | Dna_repair                  | KIRC | 0.38887574   |
| UCK1 | Dna_replication             | KIRC | 0.025315463  |
| UCK1 | Double-negative memory      | KIRC | -0.014971446 |
| UCK1 | Drug metabolism - cytoch    | KIRC | 0.118121085  |
| UCK1 | Drug metabolism - other     | KIRC | 0.217448752  |
| UCK1 | E2f_targets                 | KIRC | -0.202649483 |
| UCK1 | Ecm_receptor_interaction    | KIRC | -0.308305818 |
| UCK1 | Effector cd4+ memory t      | KIRC | -0.322268802 |
| UCK1 | Effector cd8+ memory t      | KIRC | -0.238448062 |
| UCK1 | Effector memory t cell      | KIRC | -0.236211218 |
| UCK1 | Effector regulatory t (treg | KIRC | -0.391570825 |
| UCK1 | Elvidge_hif1a_targets_up    | KIRC | -0.172432968 |
| UCK1 | Endothelial cell            | KIRC | -0.224351882 |
| UCK1 | Eosinophil                  | KIRC | -0.270632165 |
| UCK1 | Ether lipid metabolism      | KIRC | -0.185847753 |
| UCK1 | Exhausted cd4+ t cell       | KIRC | -0.299008904 |
| UCK1 | Exhausted cd8+ t cell       | KIRC | -0.213163376 |
| UCK1 | Exhausted t cell            | KIRC | -0.094803197 |
| UCK1 | Fat cell (adipocyte)        | KIRC | 0.296912669  |
| UCK1 | Fatty acid biosynthesis     | KIRC | 0.027596695  |
| UCK1 | Fatty acid degradation      | KIRC | 0.147092448  |
| UCK1 | Fatty acid elongation       | KIRC | 0.234307787  |
| UCK1 | Fibroblast                  | KIRC | -0.312652575 |
| UCK1 | Folate biosynthesis         | KIRC | 0.253607454  |
| UCK1 | Follicular b cell           | KIRC | -0.253073086 |
| UCK1 | Follicular dendritic cell   | KIRC | -0.315395092 |
| UCK1 | Follicular helper (tfh) t   | KIRC | -0.214747996 |
| UCK1 | Follicular t cell           | KIRC | 0.034910367  |
| UCK1 | Foxp3+il-17+ t cell         | KIRC | -0.145385227 |
| UCK1 | Fructose and mannose me     | KIRC | 0.095295283  |
| UCK1 | G2m_checkpoint              | KIRC | -0.319245767 |
| UCK1 | Galactose metabolism        | KIRC | 0.024965349  |
| UCK1 | Galie_tumor_stemness_ge     | KIRC | -0.185744259 |
| UCK1 | Glutathione metabolism      | KIRC | 0.175615032  |
| UCK1 | Glycerolipid metabolism     | KIRC | 0.123088315  |
| UCK1 | Glycerophospholipid met     | KIRC | 0.159376735  |

|      |                                    |      |              |
|------|------------------------------------|------|--------------|
| UCK1 | Glycine, serine and threonine      | KIRC | 0.122049583  |
| UCK1 | Glycolysis / gluconeogenesis       | KIRC | 0.083045497  |
| UCK1 | Glycosaminoglycan biosynthesis     | KIRC | -0.132035994 |
| UCK1 | Glycosaminoglycan biosynthesis     | KIRC | -0.14875224  |
| UCK1 | Glycosaminoglycan biosynthesis     | KIRC | -0.125017587 |
| UCK1 | Glycosaminoglycan degradation      | KIRC | -0.039022689 |
| UCK1 | Glycosphingolipid biosynthesis     | KIRC | -0.152565475 |
| UCK1 | Glycosphingolipid biosynthesis     | KIRC | -0.096585416 |
| UCK1 | Glycosphingolipid biosynthesis     | KIRC | -0.019550016 |
| UCK1 | Glycosylphosphatidylinositol       | KIRC | 0.091795158  |
| UCK1 | Glyoxylate and dicarboxylate       | KIRC | 0.174842493  |
| UCK1 | Granulocyte                        | KIRC | -0.277380623 |
| UCK1 | Hedgehog signaling                 | KIRC | -0.283780166 |
| UCK1 | Histidine metabolism               | KIRC | 0.078666341  |
| UCK1 | Hypoxia                            | KIRC | -0.189375887 |
| UCK1 | IL-17alpha T cell                  | KIRC | -0.146920138 |
| UCK1 | IL2_stat5_signaling                | KIRC | -0.239503798 |
| UCK1 | IL6_jak_stat3_signaling            | KIRC | -0.343792306 |
| UCK1 | Immune checkpoints                 | KIRC | -0.267004113 |
| UCK1 | Immune inhibition                  | KIRC | -0.118747667 |
| UCK1 | Inositol phosphate metabolism      | KIRC | -0.38869825  |
| UCK1 | Interleukin_6_signaling            | KIRC | -0.575704079 |
| UCK1 | Jaeger metastasis up               | KIRC | -0.32111619  |
| UCK1 | Jain_nfkB_signaling                | KIRC | -0.035563149 |
| UCK1 | Kras_signaling_up                  | KIRC | -0.422090788 |
| UCK1 | Linoleic acid metabolism           | KIRC | 0.117045475  |
| UCK1 | Lipoic acid metabolism             | KIRC | 0.165915433  |
| UCK1 | Lysine degradation                 | KIRC | 0.044678482  |
| UCK1 | Lysosome                           | KIRC | -0.111260225 |
| UCK1 | M1 macrophage                      | KIRC | -0.35061139  |
| UCK1 | M2 macrophage                      | KIRC | -0.31407557  |
| UCK1 | Mannose type O-glycan biosynthesis | KIRC | 0.136560847  |
| UCK1 | Mapk_signaling_pathway             | KIRC | -0.326714491 |
| UCK1 | Mapk3_erk1_activation              | KIRC | -0.529068447 |
| UCK1 | Marginal zone B cell               | KIRC | -0.342229519 |
| UCK1 | Memory B cell                      | KIRC | -0.308822215 |
| UCK1 | Mesenchymal cell                   | KIRC | -0.068909603 |
| UCK1 | Mesenchymal stem cell              | KIRC | -0.294715318 |
| UCK1 | Metabolism of xenobiotics          | KIRC | 0.234350911  |
| UCK1 | Migrating cancer stem cell         | KIRC | -0.316646708 |
| UCK1 | Mitotic spindle                    | KIRC | -0.438074231 |
| UCK1 | Monocyte                           | KIRC | -0.188812835 |
| UCK1 | Mtor_signaling_pathway             | KIRC | -0.187649707 |

|      |                                                   |      |              |
|------|---------------------------------------------------|------|--------------|
| UCK1 | Mtorc1_signaling                                  | KIRC | -0.207902291 |
| UCK1 | Mucin type o-glycan biosynthesis                  | KIRC | -0.424012501 |
| UCK1 | Myc_targets_v1                                    | KIRC | 0.088221608  |
| UCK1 | Myeloid cell                                      | KIRC | -0.325466554 |
| UCK1 | N-glycan biosynthesis                             | KIRC | -0.116168553 |
| UCK1 | Naive b cell                                      | KIRC | -0.095350342 |
| UCK1 | Naive cd4+ t cell                                 | KIRC | -0.265731989 |
| UCK1 | Naive cd8+ t cell                                 | KIRC | -0.164257772 |
| UCK1 | Natural killer cell                               | KIRC | -0.202991116 |
| UCK1 | Natural killer t (nkt) cell                       | KIRC | 0.099069774  |
| UCK1 | Natural regulatory t (treg) cell                  | KIRC | -0.319165335 |
| UCK1 | Neomycin, kanamycin and streptomycin              | KIRC | -0.265312238 |
| UCK1 | Neutrophil                                        | KIRC | -0.30688015  |
| UCK1 | Nicotinate and nicotinamide metabolism            | KIRC | -0.105706986 |
| UCK1 | Nitrogen metabolism                               | KIRC | -0.065510865 |
| UCK1 | Nod_like_receptor_signaling                       | KIRC | -0.392242574 |
| UCK1 | Notch_signaling                                   | KIRC | -0.135817312 |
| UCK1 | One carbon pool by folate                         | KIRC | -0.066265878 |
| UCK1 | Other glycan degradation                          | KIRC | 0.067024514  |
| UCK1 | Other types of o-glycan biosynthesis              | KIRC | 0.045341417  |
| UCK1 | Oxidative phosphorylation                         | KIRC | 0.431189983  |
| UCK1 | P53_pathway                                       | KIRC | 0.08196148   |
| UCK1 | P53_signaling_pathway                             | KIRC | -0.329667926 |
| UCK1 | Pantothenate and coenzyme a biosynthesis          | KIRC | -0.081038513 |
| UCK1 | Pentose and glucuronate interconversions          | KIRC | -0.054112124 |
| UCK1 | Pentose phosphate pathway                         | KIRC | 0.079030358  |
| UCK1 | Pericyte                                          | KIRC | -0.168547896 |
| UCK1 | Phenylalanine metabolism                          | KIRC | 0.194806073  |
| UCK1 | Phenylalanine, tyrosine and tryptophan metabolism | KIRC | 0.209340482  |
| UCK1 | Phosphonate and phosphite metabolism              | KIRC | -0.012368644 |
| UCK1 | Pi3k_akt_activation                               | KIRC | -0.442822909 |
| UCK1 | Pi3k_akt_mtor_signaling                           | KIRC | -0.25623637  |
| UCK1 | Porphyrim and chlorophyll biosynthesis            | KIRC | 0.063838355  |
| UCK1 | Primary bile acid biosynthesis                    | KIRC | 0.126142592  |
| UCK1 | Propanoate metabolism                             | KIRC | -0.025981586 |
| UCK1 | Purine metabolism                                 | KIRC | 0.093452764  |
| UCK1 | Pyrimidine metabolism                             | KIRC | 0.190397823  |
| UCK1 | Pyruvate metabolism                               | KIRC | 0.167207482  |
| UCK1 | Regulation_of_autophagy                           | KIRC | 0.043943252  |
| UCK1 | Retinol metabolism                                | KIRC | 0.179571033  |
| UCK1 | Riboflavin metabolism                             | KIRC | 0.166481871  |
| UCK1 | Schmahl_pdgf_signaling                            | KIRC | -0.18000249  |
| UCK1 | Selenocompound metabolism                         | KIRC | -0.174040273 |



|      |                            |      |              |
|------|----------------------------|------|--------------|
| UCK1 | Signaling_by_hippo         | KIRC | -0.36316352  |
| UCK1 | Sphingolipid metabolism    | KIRC | -0.199049661 |
| UCK1 | Starch and sucrose metabo  | KIRC | -0.206009181 |
| UCK1 | Steroid biosynthesis       | KIRC | 0.040470573  |
| UCK1 | Steroid hormone biosynth   | KIRC | 0.021122819  |
| UCK1 | Sulfur metabolism          | KIRC | -0.018729317 |
| UCK1 | Synthesis and degradation  | KIRC | 0.175127033  |
| UCK1 | T helper cell              | KIRC | -0.233790096 |
| UCK1 | T helper1 (th1) cell       | KIRC | -0.185807939 |
| UCK1 | T helper17 (th17) cell     | KIRC | -0.275313571 |
| UCK1 | T helper2 (th2) cell       | KIRC | -0.214025992 |
| UCK1 | T helper9 (th9) cell       | KIRC | -0.110143019 |
| UCK1 | Taurine and hypotaurine r  | KIRC | 0.000195435  |
| UCK1 | Terpenoid backbone biosy   | KIRC | 0.117811662  |
| UCK1 | Tgf_beta_signaling_pathw   | KIRC | -0.368157183 |
| UCK1 | Thiamine metabolism        | KIRC | 0.303977659  |
| UCK1 | Tnfa_signaling_via_nfkB    | KIRC | -0.265621937 |
| UCK1 | Tryptophan metabolism      | KIRC | 0.118364039  |
| UCK1 | Tumor endothelial cell     | KIRC | -0.04234389  |
| UCK1 | Tyrosine metabolism        | KIRC | 0.26578286   |
| UCK1 | Ubiquinone and other terp  | KIRC | 0.002827757  |
| UCK1 | Valine, leucine and isoleu | KIRC | 0.061484756  |
| UCK1 | Valine, leucine and isoleu | KIRC | 0.123124799  |
| UCK1 | Vascular endothelial cell  | KIRC | -0.089745761 |
| UCK1 | Vascular smooth muscle c   | KIRC | -0.008403627 |
| UCK1 | Vegf_signaling_pathway     | KIRC | -0.13696124  |
| UCK1 | Vitamin b6 metabolism      | KIRC | 0.044742598  |
| UCK1 | Willert_wnt_signaling      | KIRC | -0.12975071  |
| UCK1 | Wnt_beta_catenin_signali   | KIRC | -0.027542767 |
| UCK2 | Abnormal plasma cell       | KIRC | 0.250346146  |
| UCK2 | Activated b cell           | KIRC | 0.24541984   |
| UCK2 | Activated cd4+ t cell      | KIRC | 0.216003234  |
| UCK2 | Activated t cell           | KIRC | 0.213811486  |
| UCK2 | Alanine, aspartate and glu | KIRC | -0.164901396 |
| UCK2 | Alcala_apoptosis           | KIRC | 0.026007154  |
| UCK2 | Alpha-linolenic acid meta  | KIRC | -0.094721649 |
| UCK2 | Amino sugar and nucleoti   | KIRC | 0.08213468   |
| UCK2 | Ampk_pathway               | KIRC | -0.037311412 |
| UCK2 | Angiogenesis               | KIRC | 0.310781499  |
| UCK2 | Arachidonic acid metabol   | KIRC | 0.083719916  |
| UCK2 | Arginine and proline metε  | KIRC | -0.102046802 |
| UCK2 | Arginine biosynthesis      | KIRC | -0.362027928 |
| UCK2 | Ascorbate and aldarate mε  | KIRC | -0.161874543 |

|      |                             |      |              |
|------|-----------------------------|------|--------------|
| UCK2 | Atypical memory b cell      | KIRC | 0.082636713  |
| UCK2 | Axl+siglec6+ dendritic ce   | KIRC | 0.180065834  |
| UCK2 | B cell                      | KIRC | 0.045615889  |
| UCK2 | B1 cell                     | KIRC | 0.210676157  |
| UCK2 | Basal cell                  | KIRC | 0.514260679  |
| UCK2 | Beta-alanine metabolism     | KIRC | -0.284687989 |
| UCK2 | Biosynthesis of unsaturate  | KIRC | -0.215104381 |
| UCK2 | Biotin metabolism           | KIRC | -0.253640772 |
| UCK2 | Butanoate metabolism        | KIRC | -0.493428442 |
| UCK2 | Caffeine metabolism         | KIRC | -0.095379715 |
| UCK2 | Cancer stem cell            | KIRC | 0.264697439  |
| UCK2 | Cancer stem-like cell       | KIRC | 0.023901411  |
| UCK2 | Cd4+ cytotoxic t cell       | KIRC | 0.1968695    |
| UCK2 | Cd4+ memory t cell          | KIRC | 0.167303368  |
| UCK2 | Cd4+ regulatory t cell      | KIRC | 0.318356724  |
| UCK2 | Cd4+ t helper cell          | KIRC | 0.137890551  |
| UCK2 | Cd4+cd25+ regulatory t c    | KIRC | 0.168454063  |
| UCK2 | Cd8+ cytotoxic t cell       | KIRC | 0.136730009  |
| UCK2 | Cd8+ regulatory t cell      | KIRC | 0.12424377   |
| UCK2 | Cell_cycle                  | KIRC | 0.292798368  |
| UCK2 | Chandran_metastasis_top5    | KIRC | 0.007179233  |
| UCK2 | Citrate cycle (tca cycle)   | KIRC | -0.356837282 |
| UCK2 | Cysteine and methionine r   | KIRC | -0.155300931 |
| UCK2 | Cytokine induced killer ce  | KIRC | 0.248465101  |
| UCK2 | D-arginine and d-ornithin   | KIRC | -0.106490508 |
| UCK2 | D-glutamine and d-glutan    | KIRC | -0.445848657 |
| UCK2 | Dendritic cell              | KIRC | 0.294046719  |
| UCK2 | Dna_repair                  | KIRC | 0.152930307  |
| UCK2 | Dna_replication             | KIRC | 0.302401847  |
| UCK2 | Double-negative memory      | KIRC | 0.125945362  |
| UCK2 | Drug metabolism - cytoch    | KIRC | -0.220489237 |
| UCK2 | Drug metabolism - other c   | KIRC | 0.116984156  |
| UCK2 | E2f_targets                 | KIRC | 0.336034771  |
| UCK2 | Ecm_receptor_interaction    | KIRC | 0.286490892  |
| UCK2 | Effector cd4+ memory t (    | KIRC | 0.128257423  |
| UCK2 | Effector cd8+ memory t (    | KIRC | 0.21569734   |
| UCK2 | Effector memory t cell      | KIRC | 0.148798665  |
| UCK2 | Effector regulatory t (treg | KIRC | 0.205093278  |
| UCK2 | Elvidge_hif1a_targets_up    | KIRC | 0.030000471  |
| UCK2 | Endothelial cell            | KIRC | 0.208712075  |
| UCK2 | Eosinophil                  | KIRC | 0.232531881  |
| UCK2 | Ether lipid metabolism      | KIRC | -0.153265228 |
| UCK2 | Exhausted cd4+ t cell       | KIRC | 0.202571437  |

|      |                              |      |              |
|------|------------------------------|------|--------------|
| UCK2 | Exhausted cd8+ t cell        | KIRC | 0.279790239  |
| UCK2 | Exhausted t cell             | KIRC | 0.120430853  |
| UCK2 | Fat cell (adipocyte)         | KIRC | -0.354367563 |
| UCK2 | Fatty acid biosynthesis      | KIRC | -0.297078351 |
| UCK2 | Fatty acid degradation       | KIRC | -0.534642248 |
| UCK2 | Fatty acid elongation        | KIRC | -0.334579879 |
| UCK2 | Fibroblast                   | KIRC | 0.312358783  |
| UCK2 | Folate biosynthesis          | KIRC | -0.168612857 |
| UCK2 | Follicular b cell            | KIRC | 0.170288644  |
| UCK2 | Follicular dendritic cell    | KIRC | 0.182078035  |
| UCK2 | Follicular helper (tfh) t ce | KIRC | 0.214592273  |
| UCK2 | Follicular t cell            | KIRC | 0.155197617  |
| UCK2 | Foxp3+il-17+ t cell          | KIRC | 0.285640907  |
| UCK2 | Fructose and mannose me      | KIRC | 0.010152457  |
| UCK2 | G2m_checkpoint               | KIRC | 0.310852799  |
| UCK2 | Galactose metabolism         | KIRC | 0.191032536  |
| UCK2 | Galie_tumor_stemness_ge      | KIRC | 0.052374406  |
| UCK2 | Glutathione metabolism       | KIRC | 0.03049297   |
| UCK2 | Glycerolipid metabolism      | KIRC | -0.212055883 |
| UCK2 | Glycerophospholipid metæ     | KIRC | -0.078048387 |
| UCK2 | Glycine, serine and threor   | KIRC | -0.172578527 |
| UCK2 | Glycolysis / gluconeogene    | KIRC | -0.231677337 |
| UCK2 | Glycosaminoglycan biosy1     | KIRC | 0.498957973  |
| UCK2 | Glycosaminoglycan biosy1     | KIRC | 0.225562729  |
| UCK2 | Glycosaminoglycan biosy1     | KIRC | 0.41291767   |
| UCK2 | Glycosaminoglycan degra      | KIRC | 0.113160476  |
| UCK2 | Glycosphingolipid biosyn1    | KIRC | 0.091901525  |
| UCK2 | Glycosphingolipid biosyn1    | KIRC | 0.180200752  |
| UCK2 | Glycosphingolipid biosyn1    | KIRC | 0.032689479  |
| UCK2 | Glycosylphosphatidylinos:    | KIRC | -0.188487128 |
| UCK2 | Glyoxylate and dicarboxy     | KIRC | -0.365286098 |
| UCK2 | Granulocyte                  | KIRC | 0.236294904  |
| UCK2 | Hedgehog_signaling           | KIRC | 0.055702987  |
| UCK2 | Histidine metabolism         | KIRC | -0.189161708 |
| UCK2 | Hypoxia                      | KIRC | 0.305310981  |
| UCK2 | Il-17ralpha t cell           | KIRC | 0.131382472  |
| UCK2 | Il2_stat5_signaling          | KIRC | 0.308260903  |
| UCK2 | Il6_jak_stat3_signaling      | KIRC | 0.336421022  |
| UCK2 | Immune_checkpoints_tunr      | KIRC | 0.119451106  |
| UCK2 | Immune_inhibition_cytok      | KIRC | 0.286730655  |
| UCK2 | Inositol phosphate metabo    | KIRC | -0.242114548 |
| UCK2 | Interleukin_6_signaling      | KIRC | 0.131154957  |
| UCK2 | Jaeger_metastasis_up         | KIRC | 0.286402786  |

|      |                             |      |              |
|------|-----------------------------|------|--------------|
| UCK2 | Jain_nfkb_signaling         | KIRC | 0.061054425  |
| UCK2 | Kras_signaling_up           | KIRC | 0.167855892  |
| UCK2 | Linoleic acid metabolism    | KIRC | -0.14996975  |
| UCK2 | Lipoic acid metabolism      | KIRC | -0.367149078 |
| UCK2 | Lysine degradation          | KIRC | -0.383206785 |
| UCK2 | Lysosome                    | KIRC | -0.060714223 |
| UCK2 | M1 macrophage               | KIRC | 0.188323361  |
| UCK2 | M2 macrophage               | KIRC | 0.209559593  |
| UCK2 | Mannose type o-glycan bi    | KIRC | 0.071011271  |
| UCK2 | Mapk_signaling_pathway      | KIRC | 0.176834695  |
| UCK2 | Mapk3_erk1_activation       | KIRC | 0.077278516  |
| UCK2 | Marginal zone b cell        | KIRC | 0.221652564  |
| UCK2 | Memory b cell               | KIRC | 0.066240112  |
| UCK2 | Mesenchymal cell            | KIRC | 0.553112896  |
| UCK2 | Mesenchymal stem cell       | KIRC | 0.205787347  |
| UCK2 | Metabolism of xenobiotic    | KIRC | -0.206954932 |
| UCK2 | Migrating cancer stem cel   | KIRC | 0.105760082  |
| UCK2 | Mitotic_spindle             | KIRC | 0.091752393  |
| UCK2 | Monocyte                    | KIRC | 0.32424652   |
| UCK2 | Mtor_signaling_pathway      | KIRC | -0.233330282 |
| UCK2 | Mtorc1_signaling            | KIRC | 0.17756044   |
| UCK2 | Mucin type o-glycan biosy   | KIRC | 0.02691099   |
| UCK2 | Myc_targets_v1              | KIRC | 0.235546999  |
| UCK2 | Myeloid cell                | KIRC | 0.136226923  |
| UCK2 | N-glycan biosynthesis       | KIRC | 0.037604207  |
| UCK2 | Naive b cell                | KIRC | 0.076362578  |
| UCK2 | Naive cd4+ t cell           | KIRC | 0.146688933  |
| UCK2 | Naive cd8+ t cell           | KIRC | -0.030697424 |
| UCK2 | Natural killer cell         | KIRC | 0.175592243  |
| UCK2 | Natural killer t (nkt) cell | KIRC | 0.277562467  |
| UCK2 | Natural regulatory t (treg) | KIRC | 0.176055222  |
| UCK2 | Neomycin, kanamycin and     | KIRC | 0.385359742  |
| UCK2 | Neutrophil                  | KIRC | 0.293262933  |
| UCK2 | Nicotinate and nicotinami   | KIRC | -0.098819154 |
| UCK2 | Nitrogen metabolism         | KIRC | -0.395240462 |
| UCK2 | Nod_like_receptor_signal    | KIRC | 0.23039029   |
| UCK2 | Notch_signaling             | KIRC | 0.275513896  |
| UCK2 | One carbon pool by folate   | KIRC | -0.018259462 |
| UCK2 | Other glycan degradation    | KIRC | -0.070640807 |
| UCK2 | Other types of o-glycan b   | KIRC | 0.262582675  |
| UCK2 | Oxidative phosphorylatio    | KIRC | -0.133623172 |
| UCK2 | P53_pathway                 | KIRC | 0.229001694  |
| UCK2 | P53_signaling_pathway       | KIRC | 0.342514256  |

|      |                            |      |              |
|------|----------------------------|------|--------------|
| UCK2 | Pantothenate and coa bios  | KIRC | -0.158670607 |
| UCK2 | Pentose and glucuronate i  | KIRC | -0.10887908  |
| UCK2 | Pentose phosphate pathwa   | KIRC | 0.019443987  |
| UCK2 | Pericyte                   | KIRC | 0.217075816  |
| UCK2 | Phenylalanine metabolism   | KIRC | -0.112145516 |
| UCK2 | Phenylalanine, tyrosine ar | KIRC | -0.193223844 |
| UCK2 | Phosphonate and phosphir   | KIRC | -0.284143265 |
| UCK2 | Pi3k_akt_activation        | KIRC | 0.007248792  |
| UCK2 | Pi3k_akt_mtor_signaling    | KIRC | 0.128527345  |
| UCK2 | Porphyrin and chlorophyl   | KIRC | -0.141413711 |
| UCK2 | Primary bile acid biosynt  | KIRC | -0.224580807 |
| UCK2 | Propanoate metabolism      | KIRC | -0.541509355 |
| UCK2 | Purine metabolism          | KIRC | 0.228713918  |
| UCK2 | Pyrimidine metabolism      | KIRC | 0.230058683  |
| UCK2 | Pyruvate metabolism        | KIRC | -0.412042121 |
| UCK2 | Regulation_of_autophagy    | KIRC | -0.441112298 |
| UCK2 | Retinol metabolism         | KIRC | -0.24833245  |
| UCK2 | Riboflavin metabolism      | KIRC | 0.090525097  |
| UCK2 | Schmahl_pdgf_signaling     | KIRC | -0.050074062 |
| UCK2 | Selenocompound metabol     | KIRC | -0.201745058 |
| UCK2 | Signaling_by_hippo         | KIRC | -0.162080652 |
| UCK2 | Sphingolipid metabolism    | KIRC | -0.32146237  |
| UCK2 | Starch and sucrose metabo  | KIRC | 0.074123283  |
| UCK2 | Steroid biosynthesis       | KIRC | -0.124116221 |
| UCK2 | Steroid hormone biosynth   | KIRC | -0.163266183 |
| UCK2 | Sulfur metabolism          | KIRC | -0.068951565 |
| UCK2 | Synthesis and degradation  | KIRC | -0.447496262 |
| UCK2 | T helper cell              | KIRC | 0.164078857  |
| UCK2 | T helper1 (th1) cell       | KIRC | 0.10409411   |
| UCK2 | T helper17 (th17) cell     | KIRC | 0.319660236  |
| UCK2 | T helper2 (th2) cell       | KIRC | 0.221461441  |
| UCK2 | T helper9 (th9) cell       | KIRC | 0.141745212  |
| UCK2 | Taurine and hypotaurine r  | KIRC | -0.027419882 |
| UCK2 | Terpenoid backbone biosy   | KIRC | -0.301872609 |
| UCK2 | Tgf_beta_signaling_pathw   | KIRC | 0.080456669  |
| UCK2 | Thiamine metabolism        | KIRC | -0.255793561 |
| UCK2 | Tnfa_signaling_via_nfb     | KIRC | 0.359045305  |
| UCK2 | Tryptophan metabolism      | KIRC | -0.349132089 |
| UCK2 | Tumor endothelial cell     | KIRC | 0.293874556  |
| UCK2 | Tyrosine metabolism        | KIRC | -0.220098618 |
| UCK2 | Ubiquinone and other ter   | KIRC | -0.124014388 |
| UCK2 | Valine, leucine and isoleu | KIRC | 0.170064252  |
| UCK2 | Valine, leucine and isoleu | KIRC | -0.513481023 |

|       |                            |      |              |
|-------|----------------------------|------|--------------|
| UCK2  | Vascular endothelial cell  | KIRC | 0.105034034  |
| UCK2  | Vascular smooth muscle c   | KIRC | 0.175634264  |
| UCK2  | Vegf_signaling_pathway     | KIRC | 0.143795859  |
| UCK2  | Vitamin b6 metabolism      | KIRC | -0.098026091 |
| UCK2  | Willert_wnt_signaling      | KIRC | 0.296071081  |
| UCK2  | Wnt_beta_catenin_signali   | KIRC | 0.211361551  |
| UCKL1 | Abnormal plasma cell       | KIRC | -0.096813228 |
| UCKL1 | Activated b cell           | KIRC | -0.187534548 |
| UCKL1 | Activated cd4+ t cell      | KIRC | -0.207800245 |
| UCKL1 | Activated t cell           | KIRC | -0.195783127 |
| UCKL1 | Alanine, aspartate and glu | KIRC | -0.264773507 |
| UCKL1 | Alcala_apoptosis           | KIRC | -0.254598997 |
| UCKL1 | Alpha-linolenic acid meta  | KIRC | 0.129714258  |
| UCKL1 | Amino sugar and nucleoti   | KIRC | -0.177246    |
| UCKL1 | Ampk_pathway               | KIRC | 0.329424035  |
| UCKL1 | Angiogenesis               | KIRC | -0.347506277 |
| UCKL1 | Arachidonic acid metabol   | KIRC | -0.098318217 |
| UCKL1 | Arginine and proline metæ  | KIRC | -0.282526643 |
| UCKL1 | Arginine biosynthesis      | KIRC | -0.170402515 |
| UCKL1 | Ascorbate and aldarate me  | KIRC | -0.229359417 |
| UCKL1 | Atypical memory b cell     | KIRC | -0.101623049 |
| UCKL1 | Axl+siglec6+ dendritic ce  | KIRC | -0.322097229 |
| UCKL1 | B cell                     | KIRC | -0.284425457 |
| UCKL1 | B1 cell                    | KIRC | -0.107350128 |
| UCKL1 | Basal cell                 | KIRC | -0.03379369  |
| UCKL1 | Beta-alanine metabolism    | KIRC | -0.212722283 |
| UCKL1 | Biosynthesis of unsaturate | KIRC | -0.207999143 |
| UCKL1 | Biotin metabolism          | KIRC | -0.088619478 |
| UCKL1 | Butanoate metabolism       | KIRC | -0.13587045  |
| UCKL1 | Caffeine metabolism        | KIRC | -0.163501689 |
| UCKL1 | Cancer stem cell           | KIRC | -0.371928702 |
| UCKL1 | Cancer stem-like cell      | KIRC | -0.242645111 |
| UCKL1 | Cd4+ cytotoxic t cell      | KIRC | -0.132688331 |
| UCKL1 | Cd4+ memory t cell         | KIRC | -0.131422828 |
| UCKL1 | Cd4+ regulatory t cell     | KIRC | -0.182879152 |
| UCKL1 | Cd4+ t helper cell         | KIRC | -0.20004957  |
| UCKL1 | Cd4+cd25+ regulatory t c   | KIRC | -0.203717735 |
| UCKL1 | Cd8+ cytotoxic t cell      | KIRC | -0.141718653 |
| UCKL1 | Cd8+ regulatory t cell     | KIRC | -0.235220847 |
| UCKL1 | Cell_cycle                 | KIRC | -0.254217754 |
| UCKL1 | Chandran_metastasis_top5   | KIRC | -0.175778827 |
| UCKL1 | Citrate cycle (tca cycle)  | KIRC | -0.125455352 |
| UCKL1 | Cysteine and methionine r  | KIRC | -0.095619366 |

|       |                              |      |              |
|-------|------------------------------|------|--------------|
| UCKL1 | Cytokine induced killer cell | KIRC | -0.134314612 |
| UCKL1 | D-arginine and d-ornithin    | KIRC | -0.094938304 |
| UCKL1 | D-glutamine and d-glutan     | KIRC | -0.153550987 |
| UCKL1 | Dendritic cell               | KIRC | -0.251309151 |
| UCKL1 | Dna_repair                   | KIRC | 0.124660754  |
| UCKL1 | Dna_replication              | KIRC | -0.016672953 |
| UCKL1 | Double-negative memory       | KIRC | -0.020971936 |
| UCKL1 | Drug metabolism - cytoch     | KIRC | -0.142846114 |
| UCKL1 | Drug metabolism - other      | KIRC | -0.127531541 |
| UCKL1 | E2f_targets                  | KIRC | -0.168610117 |
| UCKL1 | Ecm_receptor_interaction     | KIRC | -0.289869494 |
| UCKL1 | Effector cd4+ memory t       | KIRC | -0.24270151  |
| UCKL1 | Effector cd8+ memory t       | KIRC | -0.134482518 |
| UCKL1 | Effector memory t cell       | KIRC | -0.230428821 |
| UCKL1 | Effector regulatory t (treg) | KIRC | -0.31128275  |
| UCKL1 | Elvidge_hif1a_targets_up     | KIRC | -0.216657086 |
| UCKL1 | Endothelial cell             | KIRC | -0.332307265 |
| UCKL1 | Eosinophil                   | KIRC | -0.218494471 |
| UCKL1 | Ether lipid metabolism       | KIRC | -0.047244716 |
| UCKL1 | Exhausted cd4+ t cell        | KIRC | -0.302381675 |
| UCKL1 | Exhausted cd8+ t cell        | KIRC | -0.175426226 |
| UCKL1 | Exhausted t cell             | KIRC | -0.14983878  |
| UCKL1 | Fat cell (adipocyte)         | KIRC | 0.116936982  |
| UCKL1 | Fatty acid biosynthesis      | KIRC | -0.018474007 |
| UCKL1 | Fatty acid degradation       | KIRC | -0.116597315 |
| UCKL1 | Fatty acid elongation        | KIRC | -0.136295124 |
| UCKL1 | Fibroblast                   | KIRC | -0.312524428 |
| UCKL1 | Folate biosynthesis          | KIRC | -0.113414018 |
| UCKL1 | Follicular b cell            | KIRC | -0.1916917   |
| UCKL1 | Follicular dendritic cell    | KIRC | -0.159604108 |
| UCKL1 | Follicular helper (tfh) t    | KIRC | -0.201163042 |
| UCKL1 | Follicular t cell            | KIRC | 0.030302576  |
| UCKL1 | Foxp3+il-17+ t cell          | KIRC | -0.064764961 |
| UCKL1 | Fructose and mannose me      | KIRC | -0.080956096 |
| UCKL1 | G2m_checkpoint               | KIRC | -0.257101908 |
| UCKL1 | Galactose metabolism         | KIRC | -0.176342522 |
| UCKL1 | Galie_tumor_stemness_ge      | KIRC | -0.319406138 |
| UCKL1 | Glutathione metabolism       | KIRC | -0.245761566 |
| UCKL1 | Glycerolipid metabolism      | KIRC | 0.0203226    |
| UCKL1 | Glycerophospholipid met      | KIRC | 0.298101499  |
| UCKL1 | Glycine, serine and threor   | KIRC | -0.128778834 |
| UCKL1 | Glycolysis / gluconeogene    | KIRC | -0.177973587 |
| UCKL1 | Glycosaminoglycan biosy      | KIRC | -0.200102114 |

|       |                           |      |              |
|-------|---------------------------|------|--------------|
| UCKL1 | Glycosaminoglycan biosyn  | KIRC | -0.312765119 |
| UCKL1 | Glycosaminoglycan biosyn  | KIRC | -0.164401865 |
| UCKL1 | Glycosaminoglycan degra   | KIRC | -0.041839615 |
| UCKL1 | Glycosphingolipid biosyn  | KIRC | -0.269929729 |
| UCKL1 | Glycosphingolipid biosyn  | KIRC | -0.261915842 |
| UCKL1 | Glycosphingolipid biosyn  | KIRC | -0.314029319 |
| UCKL1 | Glycosylphosphatidylinos  | KIRC | -0.067573495 |
| UCKL1 | Glyoxylate and dicarboxy  | KIRC | -0.078610041 |
| UCKL1 | Granulocyte               | KIRC | -0.243500535 |
| UCKL1 | Hedgehog_signaling        | KIRC | -0.27483954  |
| UCKL1 | Histidine metabolism      | KIRC | -0.207481186 |
| UCKL1 | Hypoxia                   | KIRC | -0.241273913 |
| UCKL1 | Il-17alpha t cell         | KIRC | -0.177799759 |
| UCKL1 | Il2_stat5_signaling       | KIRC | -0.366054294 |
| UCKL1 | Il6_jak_stat3_signaling   | KIRC | -0.337546044 |
| UCKL1 | Immune_checkpoints_tur    | KIRC | -0.303267832 |
| UCKL1 | Immune_inhibition_cytok   | KIRC | -0.179329485 |
| UCKL1 | Inositol phosphate metabo | KIRC | -0.203186695 |
| UCKL1 | Interleukin_6_signaling   | KIRC | -0.358414263 |
| UCKL1 | Jaeger_metastasis_up      | KIRC | -0.439526575 |
| UCKL1 | Jain_nfkb_signaling       | KIRC | -0.222620618 |
| UCKL1 | Kras_signaling_up         | KIRC | -0.490880965 |
| UCKL1 | Linoleic acid metabolism  | KIRC | 0.209768192  |
| UCKL1 | Lipoic acid metabolism    | KIRC | 0.00497654   |
| UCKL1 | Lysine degradatation      | KIRC | -0.069983519 |
| UCKL1 | Lysosome                  | KIRC | -0.226033894 |
| UCKL1 | M1 macrophage             | KIRC | -0.24956677  |
| UCKL1 | M2 macrophage             | KIRC | -0.319094769 |
| UCKL1 | Mannose type o-glycan bi  | KIRC | 0.109879451  |
| UCKL1 | Mapk_signaling_pathway    | KIRC | -0.258675459 |
| UCKL1 | Mapk3_erk1_activation     | KIRC | -0.330902775 |
| UCKL1 | Marginal zone b cell      | KIRC | -0.313614252 |
| UCKL1 | Memory b cell             | KIRC | -0.275764032 |
| UCKL1 | Mesenchymal cell          | KIRC | -0.176776006 |
| UCKL1 | Mesenchymal stem cell     | KIRC | -0.266768379 |
| UCKL1 | Metabolism of xenobiotic  | KIRC | -0.109132459 |
| UCKL1 | Migrating cancer stem cel | KIRC | -0.1049918   |
| UCKL1 | Mitotic_spindle           | KIRC | -0.286844113 |
| UCKL1 | Monocyte                  | KIRC | -0.18736231  |
| UCKL1 | Mtor_signaling_pathway    | KIRC | -0.065244164 |
| UCKL1 | Mtorc1_signaling          | KIRC | -0.356493187 |
| UCKL1 | Mucin type o-glycan bios  | KIRC | -0.490233426 |
| UCKL1 | Myc_targets_v1            | KIRC | -0.142688003 |



|       |                             |      |              |
|-------|-----------------------------|------|--------------|
| UCKL1 | Myeloid cell                | KIRC | -0.274090222 |
| UCKL1 | N-glycan biosynthesis       | KIRC | -0.274943904 |
| UCKL1 | Naive b cell                | KIRC | -0.060337432 |
| UCKL1 | Naive cd4+ t cell           | KIRC | -0.24950098  |
| UCKL1 | Naive cd8+ t cell           | KIRC | -0.045183322 |
| UCKL1 | Natural killer cell         | KIRC | -0.217703815 |
| UCKL1 | Natural killer t (nkt) cell | KIRC | 0.108182839  |
| UCKL1 | Natural regulatory t (treg) | KIRC | -0.239611112 |
| UCKL1 | Neomycin, kanamycin and     | KIRC | -0.183623285 |
| UCKL1 | Neutrophil                  | KIRC | -0.269053641 |
| UCKL1 | Nicotinate and nicotinami   | KIRC | -0.134569637 |
| UCKL1 | Nitrogen metabolism         | KIRC | -0.32889145  |
| UCKL1 | Nod_like_receptor_signal    | KIRC | -0.282985473 |
| UCKL1 | Notch_signaling             | KIRC | -0.340666044 |
| UCKL1 | One carbon pool by folate   | KIRC | -0.226714424 |
| UCKL1 | Other glycan degradation    | KIRC | 0.208102901  |
| UCKL1 | Other types of o-glycan b   | KIRC | 0.164402574  |
| UCKL1 | Oxidative phosphorylatio    | KIRC | 0.086466756  |
| UCKL1 | P53_pathway                 | KIRC | -0.163098727 |
| UCKL1 | P53_signaling_pathway       | KIRC | -0.286170212 |
| UCKL1 | Pantothenate and coa bios   | KIRC | -0.220568212 |
| UCKL1 | Pentose and glucuronate i   | KIRC | -0.248021636 |
| UCKL1 | Pentose phosphate pathwa    | KIRC | -0.190308875 |
| UCKL1 | Pericyte                    | KIRC | -0.21921828  |
| UCKL1 | Phenylalanine metabolism    | KIRC | -0.14349193  |
| UCKL1 | Phenylalanine, tyrosine ar  | KIRC | -0.050692117 |
| UCKL1 | Phosphonate and phosphir    | KIRC | -0.046997525 |
| UCKL1 | Pi3k_akt_activation         | KIRC | -0.297794892 |
| UCKL1 | Pi3k_akt_mtor_signaling     | KIRC | -0.449372291 |
| UCKL1 | Porphyrin and chlorophyl    | KIRC | -0.154544628 |
| UCKL1 | Primary bile acid biosynt   | KIRC | -0.143444843 |
| UCKL1 | Propanoate metabolism       | KIRC | -0.158462757 |
| UCKL1 | Purine metabolism           | KIRC | -0.17228355  |
| UCKL1 | Pyrimidine metabolism       | KIRC | -0.024351907 |
| UCKL1 | Pyruvate metabolism         | KIRC | -0.091146791 |
| UCKL1 | Regulation_of_autophagy     | KIRC | 0.012238119  |
| UCKL1 | Retinol metabolism          | KIRC | -0.099620489 |
| UCKL1 | Riboflavin metabolism       | KIRC | -0.134416688 |
| UCKL1 | Schmahl_pdgf_signaling      | KIRC | -0.304136676 |
| UCKL1 | Selenocompound metabol      | KIRC | -0.187108299 |
| UCKL1 | Signaling_by_hippo          | KIRC | -0.336246543 |
| UCKL1 | Sphingolipid metabolism     | KIRC | -0.249562098 |
| UCKL1 | Starch and sucrose metabo   | KIRC | -0.263996844 |

|       |                            |      |              |
|-------|----------------------------|------|--------------|
| UCKL1 | Steroid biosynthesis       | KIRC | 0.07781512   |
| UCKL1 | Steroid hormone biosynth   | KIRC | -0.096441842 |
| UCKL1 | Sulfur metabolism          | KIRC | -0.217668843 |
| UCKL1 | Synthesis and degradation  | KIRC | -0.070578343 |
| UCKL1 | T helper cell              | KIRC | -0.269550144 |
| UCKL1 | T helper1 (th1) cell       | KIRC | -0.235070096 |
| UCKL1 | T helper17 (th17) cell     | KIRC | -0.167879528 |
| UCKL1 | T helper2 (th2) cell       | KIRC | -0.272821689 |
| UCKL1 | T helper9 (th9) cell       | KIRC | -0.142012827 |
| UCKL1 | Taurine and hypotaurine r  | KIRC | 0.078007076  |
| UCKL1 | Terpenoid backbone biosy   | KIRC | -0.218138083 |
| UCKL1 | Tgf_beta_signaling_pathw   | KIRC | -0.371401218 |
| UCKL1 | Thiamine metabolism        | KIRC | -0.039049226 |
| UCKL1 | Tnfa_signaling_via_nfb     | KIRC | -0.236292945 |
| UCKL1 | Tryptophan metabolism      | KIRC | -0.199285482 |
| UCKL1 | Tumor endothelial cell     | KIRC | 0.056370531  |
| UCKL1 | Tyrosine metabolism        | KIRC | -0.11784381  |
| UCKL1 | Ubiquinone and other ter   | KIRC | -0.074051143 |
| UCKL1 | Valine, leucine and isoleu | KIRC | -0.004656617 |
| UCKL1 | Valine, leucine and isoleu | KIRC | -0.137642234 |
| UCKL1 | Vascular endothelial cell  | KIRC | -0.179905251 |
| UCKL1 | Vascular smooth muscle c   | KIRC | -0.1072682   |
| UCKL1 | Vegf_signaling_pathway     | KIRC | -0.200531791 |
| UCKL1 | Vitamin b6 metabolism      | KIRC | -0.197508692 |
| UCKL1 | Willert_wnt_signaling      | KIRC | -0.394505467 |
| UCKL1 | Wnt_beta_catenin_signali   | KIRC | -0.041643222 |
| UPP1  | Abnormal plasma cell       | KIRC | 0.06848084   |
| UPP1  | Activated b cell           | KIRC | -0.073999767 |
| UPP1  | Activated cd4+ t cell      | KIRC | -0.169366647 |
| UPP1  | Activated t cell           | KIRC | -0.143731458 |
| UPP1  | Alanine, aspartate and glu | KIRC | -0.214190253 |
| UPP1  | Alcala_apoptosis           | KIRC | -0.009208929 |
| UPP1  | Alpha-linolenic acid meta  | KIRC | 0.303679406  |
| UPP1  | Amino sugar and nucleoti   | KIRC | 0.062140146  |
| UPP1  | Ampk_pathway               | KIRC | 0.101982781  |
| UPP1  | Angiogenesis               | KIRC | -0.158167776 |
| UPP1  | Arachidonic acid metabol   | KIRC | 0.149681196  |
| UPP1  | Arginine and proline met   | KIRC | -0.158226558 |
| UPP1  | Arginine biosynthesis      | KIRC | -0.121035968 |
| UPP1  | Ascorbate and aldarate m   | KIRC | -0.364603044 |
| UPP1  | Atypical memory b cell     | KIRC | -0.18613962  |
| UPP1  | Axl+siglec6+ dendritic ce  | KIRC | -0.134478466 |
| UPP1  | B cell                     | KIRC | -0.2939298   |

|      |                             |      |              |
|------|-----------------------------|------|--------------|
| UPP1 | B1 cell                     | KIRC | -0.097311177 |
| UPP1 | Basal cell                  | KIRC | 0.382665583  |
| UPP1 | Beta-alanine metabolism     | KIRC | -0.325106001 |
| UPP1 | Biosynthesis of unsaturate  | KIRC | -0.080296461 |
| UPP1 | Biotin metabolism           | KIRC | 0.02169465   |
| UPP1 | Butanoate metabolism        | KIRC | -0.232113051 |
| UPP1 | Caffeine metabolism         | KIRC | 0.113332623  |
| UPP1 | Cancer stem cell            | KIRC | -0.319174435 |
| UPP1 | Cancer stem-like cell       | KIRC | -0.206105464 |
| UPP1 | Cd4+ cytotoxic t cell       | KIRC | -0.112376988 |
| UPP1 | Cd4+ memory t cell          | KIRC | -0.083212066 |
| UPP1 | Cd4+ regulatory t cell      | KIRC | -0.121005116 |
| UPP1 | Cd4+ t helper cell          | KIRC | -0.21374482  |
| UPP1 | Cd4+cd25+ regulatory t c    | KIRC | -0.192747909 |
| UPP1 | Cd8+ cytotoxic t cell       | KIRC | -0.139822687 |
| UPP1 | Cd8+ regulatory t cell      | KIRC | -0.149701647 |
| UPP1 | Cell_cycle                  | KIRC | 0.026033774  |
| UPP1 | Chandran_metastasis_top5    | KIRC | -0.178154055 |
| UPP1 | Citrate cycle (tca cycle)   | KIRC | -0.039903759 |
| UPP1 | Cysteine and methionine r   | KIRC | -0.046769415 |
| UPP1 | Cytokine induced killer c   | KIRC | -0.026103699 |
| UPP1 | D-arginine and d-ornithin   | KIRC | -0.269038933 |
| UPP1 | D-glutamine and d-glutan    | KIRC | -0.333051856 |
| UPP1 | Dendritic cell              | KIRC | -0.168784644 |
| UPP1 | Dna_repair                  | KIRC | 0.44079787   |
| UPP1 | Dna_replication             | KIRC | 0.146214345  |
| UPP1 | Double-negative memory      | KIRC | -0.007048363 |
| UPP1 | Drug metabolism - cytoch    | KIRC | -0.185058619 |
| UPP1 | Drug metabolism - other     | KIRC | 0.165778429  |
| UPP1 | E2f_targets                 | KIRC | 0.04373044   |
| UPP1 | Ecm_receptor_interaction    | KIRC | -0.06460526  |
| UPP1 | Effector cd4+ memory t (    | KIRC | -0.280720384 |
| UPP1 | Effector cd8+ memory t (    | KIRC | -0.170168012 |
| UPP1 | Effector memory t cell      | KIRC | -0.188905069 |
| UPP1 | Effector regulatory t (treg | KIRC | -0.302954523 |
| UPP1 | Elvidge_hif1a_targets_up    | KIRC | 0.169304869  |
| UPP1 | Endothelial cell            | KIRC | -0.230959636 |
| UPP1 | Eosinophil                  | KIRC | -0.125204329 |
| UPP1 | Ether lipid metabolism      | KIRC | -0.07524029  |
| UPP1 | Exhausted cd4+ t cell       | KIRC | -0.213478688 |
| UPP1 | Exhausted cd8+ t cell       | KIRC | -0.11865943  |
| UPP1 | Exhausted t cell            | KIRC | -0.154917063 |
| UPP1 | Fat cell (adipocyte)        | KIRC | 0.144533048  |

|      |                              |      |              |
|------|------------------------------|------|--------------|
| UPP1 | Fatty acid biosynthesis      | KIRC | 0.157157798  |
| UPP1 | Fatty acid degradation       | KIRC | -0.248459968 |
| UPP1 | Fatty acid elongation        | KIRC | -0.062416423 |
| UPP1 | Fibroblast                   | KIRC | -0.20077832  |
| UPP1 | Folate biosynthesis          | KIRC | 0.098946641  |
| UPP1 | Follicular b cell            | KIRC | -0.133921794 |
| UPP1 | Follicular dendritic cell    | KIRC | 0.047448449  |
| UPP1 | Follicular helper (tfh) t ce | KIRC | -0.231413012 |
| UPP1 | Follicular t cell            | KIRC | 0.001075801  |
| UPP1 | Foxp3+il-17+ t cell          | KIRC | -0.012967705 |
| UPP1 | Fructose and mannose me      | KIRC | -0.135483303 |
| UPP1 | G2m_checkpoint               | KIRC | -0.070323037 |
| UPP1 | Galactose metabolism         | KIRC | 0.039277725  |
| UPP1 | Galie_tumor_stemness_ge      | KIRC | -0.122141026 |
| UPP1 | Glutathione metabolism       | KIRC | 0.141913848  |
| UPP1 | Glycerolipid metabolism      | KIRC | -0.175495105 |
| UPP1 | Glycerophospholipid met&     | KIRC | 0.256303258  |
| UPP1 | Glycine, serine and threor   | KIRC | -0.178105093 |
| UPP1 | Glycolysis / gluconeogene    | KIRC | -0.173360673 |
| UPP1 | Glycosaminoglycan biosy      | KIRC | 0.163206718  |
| UPP1 | Glycosaminoglycan biosy      | KIRC | 0.03130296   |
| UPP1 | Glycosaminoglycan biosy      | KIRC | 0.267366195  |
| UPP1 | Glycosaminoglycan degra      | KIRC | 0.242967259  |
| UPP1 | Glycosphingolipid biosyn     | KIRC | 0.183382275  |
| UPP1 | Glycosphingolipid biosyn     | KIRC | 0.132990545  |
| UPP1 | Glycosphingolipid biosyn     | KIRC | -0.121648259 |
| UPP1 | Glycosylphosphatidylinos     | KIRC | 0.092345348  |
| UPP1 | Glyoxylate and dicarboxy     | KIRC | -0.101525213 |
| UPP1 | Granulocyte                  | KIRC | -0.253377943 |
| UPP1 | Hedgehog_signaling           | KIRC | -0.345904965 |
| UPP1 | Histidine metabolism         | KIRC | -0.467467358 |
| UPP1 | Hypoxia                      | KIRC | -0.118144017 |
| UPP1 | Il-17alpha t cell            | KIRC | -0.145159161 |
| UPP1 | Il2_stat5_signaling          | KIRC | -0.120974454 |
| UPP1 | Il6_jak_stat3_signaling      | KIRC | -0.171538082 |
| UPP1 | Immune_checkpoints_tun       | KIRC | -0.073845091 |
| UPP1 | Immune_inhibition_cytok      | KIRC | 0.060061033  |
| UPP1 | Inositol phosphate metabo    | KIRC | -0.325307053 |
| UPP1 | Interleukin_6_signaling      | KIRC | -0.383578451 |
| UPP1 | Jaeger_metastasis_up         | KIRC | -0.015263647 |
| UPP1 | Jain_nfkb_signaling          | KIRC | -0.213389188 |
| UPP1 | Kras_signaling_up            | KIRC | -0.203817312 |
| UPP1 | Linoleic acid metabolism     | KIRC | 0.196982     |

|      |                             |      |              |
|------|-----------------------------|------|--------------|
| UPP1 | Lipoic acid metabolism      | KIRC | -0.150071664 |
| UPP1 | Lysine degradation          | KIRC | -0.357990362 |
| UPP1 | Lysosome                    | KIRC | 0.069805916  |
| UPP1 | M1 macrophage               | KIRC | -0.11224944  |
| UPP1 | M2 macrophage               | KIRC | -0.222889831 |
| UPP1 | Mannose type o-glycan bi    | KIRC | 0.082550364  |
| UPP1 | Mapk_signaling_pathway      | KIRC | -0.079649819 |
| UPP1 | Mapk3_erk1_activation       | KIRC | -0.348811961 |
| UPP1 | Marginal zone b cell        | KIRC | -0.276995778 |
| UPP1 | Memory b cell               | KIRC | -0.198943227 |
| UPP1 | Mesenchymal cell            | KIRC | 0.096314384  |
| UPP1 | Mesenchymal stem cell       | KIRC | -0.296409235 |
| UPP1 | Metabolism of xenobiotic    | KIRC | -0.049485534 |
| UPP1 | Migrating cancer stem cel   | KIRC | 0.232641318  |
| UPP1 | Mitotic_spindle             | KIRC | -0.381781963 |
| UPP1 | Monocyte                    | KIRC | -0.005099099 |
| UPP1 | Mtor_signaling_pathway      | KIRC | -0.223615593 |
| UPP1 | Mtorc1_signaling            | KIRC | 0.139220091  |
| UPP1 | Mucin type o-glycan biosy   | KIRC | -0.193410561 |
| UPP1 | Myc_targets_v1              | KIRC | 0.301097763  |
| UPP1 | Myeloid cell                | KIRC | -0.27736932  |
| UPP1 | N-glycan biosynthesis       | KIRC | 0.104060881  |
| UPP1 | Naive b cell                | KIRC | -0.038101338 |
| UPP1 | Naive cd4+ t cell           | KIRC | -0.131920054 |
| UPP1 | Naive cd8+ t cell           | KIRC | -0.074798839 |
| UPP1 | Natural killer cell         | KIRC | -0.160853738 |
| UPP1 | Natural killer t (nkt) cell | KIRC | 0.233242728  |
| UPP1 | Natural regulatory t (treg) | KIRC | -0.218583234 |
| UPP1 | Neomycin, kanamycin and     | KIRC | 0.048853816  |
| UPP1 | Neutrophil                  | KIRC | 0.000439296  |
| UPP1 | Nicotinate and nicotinami   | KIRC | -0.136016849 |
| UPP1 | Nitrogen metabolism         | KIRC | -0.271999115 |
| UPP1 | Nod_like_receptor_signal    | KIRC | -0.19189147  |
| UPP1 | Notch_signaling             | KIRC | -0.128680363 |
| UPP1 | One carbon pool by folate   | KIRC | -0.341094765 |
| UPP1 | Other glycan degradation    | KIRC | 0.157482027  |
| UPP1 | Other types of o-glycan b   | KIRC | 0.191670838  |
| UPP1 | Oxidative phosphorylatio    | KIRC | 0.387984331  |
| UPP1 | P53_pathway                 | KIRC | 0.165342975  |
| UPP1 | P53_signaling_pathway       | KIRC | 0.068511784  |
| UPP1 | Pantothenate and coa bios   | KIRC | -0.173029258 |
| UPP1 | Pentose and glucuronate i   | KIRC | -0.310315309 |
| UPP1 | Pentose phosphate pathwa    | KIRC | 0.052409177  |

|      |                            |      |              |
|------|----------------------------|------|--------------|
| UPP1 | Pericyte                   | KIRC | -0.23973906  |
| UPP1 | Phenylalanine metabolism   | KIRC | -0.085437142 |
| UPP1 | Phenylalanine, tyrosine ar | KIRC | 0.037736689  |
| UPP1 | Phosphonate and phosphir   | KIRC | -0.071369889 |
| UPP1 | Pi3k_akt_activation        | KIRC | -0.156695406 |
| UPP1 | Pi3k_akt_mtor_signaling    | KIRC | -0.041153668 |
| UPP1 | Porphyrin and chlorophyl   | KIRC | -0.058638081 |
| UPP1 | Primary bile acid biosynt  | KIRC | -0.135180163 |
| UPP1 | Propanoate metabolism      | KIRC | -0.284331931 |
| UPP1 | Purine metabolism          | KIRC | 0.274345467  |
| UPP1 | Pyrimidine metabolism      | KIRC | 0.324077592  |
| UPP1 | Pyruvate metabolism        | KIRC | -0.07000373  |
| UPP1 | Regulation_of_autophagy    | KIRC | 0.044905599  |
| UPP1 | Retinol metabolism         | KIRC | -0.097125874 |
| UPP1 | Riboflavin metabolism      | KIRC | 0.11254447   |
| UPP1 | Schmahl_pdgf_signaling     | KIRC | -0.248654962 |
| UPP1 | Selenocompound metabol     | KIRC | -0.170584764 |
| UPP1 | Signaling_by_hippo         | KIRC | -0.422374392 |
| UPP1 | Sphingolipid metabolism    | KIRC | -0.228752495 |
| UPP1 | Starch and sucrose metabo  | KIRC | -0.133272059 |
| UPP1 | Steroid biosynthesis       | KIRC | 0.397705399  |
| UPP1 | Steroid hormone biosynth   | KIRC | -0.077283854 |
| UPP1 | Sulfur metabolism          | KIRC | -0.006951894 |
| UPP1 | Synthesis and degradation  | KIRC | -0.10806458  |
| UPP1 | T helper cell              | KIRC | -0.258372223 |
| UPP1 | T helper1 (th1) cell       | KIRC | -0.239676335 |
| UPP1 | T helper17 (th17) cell     | KIRC | -0.122906889 |
| UPP1 | T helper2 (th2) cell       | KIRC | -0.222358461 |
| UPP1 | T helper9 (th9) cell       | KIRC | -0.074601788 |
| UPP1 | Taurine and hypotaurine r  | KIRC | 0.104100664  |
| UPP1 | Terpenoid backbone biosy   | KIRC | -0.047665517 |
| UPP1 | Tgf_beta_signaling_pathw   | KIRC | -0.222083977 |
| UPP1 | Thiamine metabolism        | KIRC | -0.071093687 |
| UPP1 | Tnfa_signaling_via_nfkb    | KIRC | -0.031866312 |
| UPP1 | Tryptophan metabolism      | KIRC | -0.278709342 |
| UPP1 | Tumor endothelial cell     | KIRC | 0.228782067  |
| UPP1 | Tyrosine metabolism        | KIRC | 0.071784946  |
| UPP1 | Ubiquinone and other ter   | KIRC | 0.188463157  |
| UPP1 | Valine, leucine and isoleu | KIRC | 0.316394572  |
| UPP1 | Valine, leucine and isoleu | KIRC | -0.266205114 |
| UPP1 | Vascular endothelial cell  | KIRC | -0.254619925 |
| UPP1 | Vascular smooth muscle c   | KIRC | -0.055635524 |
| UPP1 | Vegf_signaling_pathway     | KIRC | 0.040450967  |

|      |                                      |      |              |
|------|--------------------------------------|------|--------------|
| UPP1 | Vitamin b6 metabolism                | KIRC | -0.076969221 |
| UPP1 | Willert_wnt_signaling                | KIRC | -0.039757397 |
| UPP1 | Wnt_beta_catenin_signali             | KIRC | -0.04731835  |
| UPP2 | Abnormal plasma cell                 | KIRC | -0.099269122 |
| UPP2 | Activated b cell                     | KIRC | 0.020059518  |
| UPP2 | Activated cd4+ t cell                | KIRC | 0.014814874  |
| UPP2 | Activated t cell                     | KIRC | 0.038091937  |
| UPP2 | Alanine, aspartate and glu           | KIRC | 0.24583635   |
| UPP2 | Alcala_apoptosis                     | KIRC | 0.128430431  |
| UPP2 | Alpha-linolenic acid meta            | KIRC | 0.116511924  |
| UPP2 | Amino sugar and nucleoti             | KIRC | 0.098883064  |
| UPP2 | Ampk_pathway                         | KIRC | -0.018353778 |
| UPP2 | Angiogenesis                         | KIRC | -0.026774226 |
| UPP2 | Arachidonic acid metabol             | KIRC | 0.201701844  |
| UPP2 | Arginine and proline metæ            | KIRC | 0.239131117  |
| UPP2 | Arginine biosynthesis                | KIRC | 0.202634847  |
| UPP2 | Ascorbate and aldarate mε            | KIRC | 0.291409848  |
| UPP2 | Atypical memory b cell               | KIRC | 0.167814101  |
| UPP2 | Axl+siglec6+ dendritic ce            | KIRC | -0.060109448 |
| UPP2 | B cell                               | KIRC | 0.127945477  |
| UPP2 | B1 cell                              | KIRC | 0.038446471  |
| UPP2 | Basal cell                           | KIRC | -0.01714214  |
| UPP2 | Beta-alanine metabolism              | KIRC | 0.255711888  |
| UPP2 | Biosynthesis of unsaturate           | KIRC | 0.194095516  |
| UPP2 | Biotin metabolism                    | KIRC | -0.002501378 |
| UPP2 | Butanoate metabolism                 | KIRC | 0.184153724  |
| UPP2 | Caffeine metabolism                  | KIRC | 0.104067983  |
| UPP2 | Cancer stem cell                     | KIRC | -0.011642375 |
| UPP2 | Cancer stem-like cell                | KIRC | 0.060791698  |
| UPP2 | Cd4+ cytotoxic t cell                | KIRC | 0.003609589  |
| UPP2 | Cd4+ memory t cell                   | KIRC | 0.029533109  |
| UPP2 | Cd4+ regulatory t cell               | KIRC | -0.051733826 |
| UPP2 | Cd4+ t helper cell                   | KIRC | 0.049381735  |
| UPP2 | Cd4+cd25+ regulatory t c             | KIRC | 0.028424932  |
| UPP2 | Cd8+ cytotoxic t cell                | KIRC | 0.046747047  |
| UPP2 | Cd8+ regulatory t cell               | KIRC | 0.01780978   |
| UPP2 | Cell_cycle                           | KIRC | -0.161041604 |
| UPP2 | Chandran_metastasis_top <sup>5</sup> | KIRC | -0.04162705  |
| UPP2 | Citrate cycle (tca cycle)            | KIRC | 0.112862841  |
| UPP2 | Cysteine and methionine r            | KIRC | 0.232765459  |
| UPP2 | Cytokine induced killer cε           | KIRC | -0.060862065 |
| UPP2 | D-arginine and d-ornithin            | KIRC | 0.312950292  |
| UPP2 | D-glutamine and d-glutan             | KIRC | 0.070509576  |

|      |                              |      |              |
|------|------------------------------|------|--------------|
| UPP2 | Dendritic cell               | KIRC | 0.018239287  |
| UPP2 | Dna_repair                   | KIRC | -0.004456107 |
| UPP2 | Dna_replication              | KIRC | -0.10485742  |
| UPP2 | Double-negative memory       | KIRC | 0.03809097   |
| UPP2 | Drug metabolism - cytoch     | KIRC | 0.378532176  |
| UPP2 | Drug metabolism - other      | KIRC | 0.297262595  |
| UPP2 | E2f_targets                  | KIRC | -0.120142642 |
| UPP2 | Ecm_receptor_interaction     | KIRC | -0.141684054 |
| UPP2 | Effector cd4+ memory t (     | KIRC | 0.067437355  |
| UPP2 | Effector cd8+ memory t (     | KIRC | -0.008484291 |
| UPP2 | Effector memory t cell       | KIRC | 0.035223374  |
| UPP2 | Effector regulatory t (treg  | KIRC | -0.068727838 |
| UPP2 | Elvidge_hif1a_targets_up     | KIRC | -0.104388156 |
| UPP2 | Endothelial cell             | KIRC | -0.099194131 |
| UPP2 | Eosinophil                   | KIRC | 0.00685514   |
| UPP2 | Ether lipid metabolism       | KIRC | 0.118595974  |
| UPP2 | Exhausted cd4+ t cell        | KIRC | -0.013765966 |
| UPP2 | Exhausted cd8+ t cell        | KIRC | 0.005196636  |
| UPP2 | Exhausted t cell             | KIRC | 0.052985206  |
| UPP2 | Fat cell (adipocyte)         | KIRC | 0.017048779  |
| UPP2 | Fatty acid biosynthesis      | KIRC | 0.07095158   |
| UPP2 | Fatty acid degradation       | KIRC | 0.224804397  |
| UPP2 | Fatty acid elongation        | KIRC | 0.146334075  |
| UPP2 | Fibroblast                   | KIRC | -0.082152748 |
| UPP2 | Folate biosynthesis          | KIRC | 0.19837006   |
| UPP2 | Follicular b cell            | KIRC | 0.009479407  |
| UPP2 | Follicular dendritic cell    | KIRC | -0.050041134 |
| UPP2 | Follicular helper (tfh) t ce | KIRC | 0.060878316  |
| UPP2 | Follicular t cell            | KIRC | 0.05535761   |
| UPP2 | Foxp3+il-17+ t cell          | KIRC | 0.014094721  |
| UPP2 | Fructose and mannose me      | KIRC | 0.279695667  |
| UPP2 | G2m_checkpoint               | KIRC | -0.183064102 |
| UPP2 | Galactose metabolism         | KIRC | 0.08936898   |
| UPP2 | Galie_tumor_stemness_ge      | KIRC | -0.161982044 |
| UPP2 | Glutathione metabolism       | KIRC | 0.170006865  |
| UPP2 | Glycerolipid metabolism      | KIRC | 0.230465827  |
| UPP2 | Glycerophospholipid metæ     | KIRC | 0.135001969  |
| UPP2 | Glycine, serine and threor   | KIRC | 0.314621537  |
| UPP2 | Glycolysis / gluconeogene    | KIRC | 0.264104935  |
| UPP2 | Glycosaminoglycan biosy1     | KIRC | -0.104324562 |
| UPP2 | Glycosaminoglycan biosy1     | KIRC | -0.133735031 |
| UPP2 | Glycosaminoglycan biosy1     | KIRC | -0.164965754 |
| UPP2 | Glycosaminoglycan degra      | KIRC | 0.056829208  |



|      |                           |      |              |
|------|---------------------------|------|--------------|
| UPP2 | Glycosphingolipid biosyn  | KIRC | -0.171039393 |
| UPP2 | Glycosphingolipid biosyn  | KIRC | -0.08047398  |
| UPP2 | Glycosphingolipid biosyn  | KIRC | 0.135048585  |
| UPP2 | Glycosylphosphatidylinos  | KIRC | -0.002277303 |
| UPP2 | Glyoxylate and dicarboxy  | KIRC | 0.208358935  |
| UPP2 | Granulocyte               | KIRC | 0.054328106  |
| UPP2 | Hedgehog_signaling        | KIRC | -0.088113345 |
| UPP2 | Histidine metabolism      | KIRC | 0.269255303  |
| UPP2 | Hypoxia                   | KIRC | 0.071346908  |
| UPP2 | Il-17alpha t cell         | KIRC | 0.04871868   |
| UPP2 | Il2_stat5_signaling       | KIRC | 0.044752964  |
| UPP2 | Il6_jak_stat3_signaling   | KIRC | 0.061485077  |
| UPP2 | Immune_checkpoints_tun    | KIRC | -0.083612207 |
| UPP2 | Immune_inhibition_cytok   | KIRC | 0.031956303  |
| UPP2 | Inositol phosphate metabo | KIRC | -0.086417761 |
| UPP2 | Interleukin_6_signaling   | KIRC | -0.061411127 |
| UPP2 | Jaeger_metastasis_up      | KIRC | -0.028035662 |
| UPP2 | Jain_nfkb_signaling       | KIRC | 0.073153968  |
| UPP2 | Kras_signaling_up         | KIRC | -0.033871799 |
| UPP2 | Linoleic acid metabolism  | KIRC | 0.18599766   |
| UPP2 | Lipoic acid metabolism    | KIRC | 0.088195704  |
| UPP2 | Lysine degradation        | KIRC | 0.082296141  |
| UPP2 | Lysosome                  | KIRC | 0.054650293  |
| UPP2 | M1 macrophage             | KIRC | 0.009762295  |
| UPP2 | M2 macrophage             | KIRC | 4.32E-05     |
| UPP2 | Mannose type o-glycan bi  | KIRC | -0.147299189 |
| UPP2 | Mapk_signaling_pathway    | KIRC | -0.159947705 |
| UPP2 | Mapk3_erk1_activation     | KIRC | -0.071601894 |
| UPP2 | Marginal zone b cell      | KIRC | -0.019801235 |
| UPP2 | Memory b cell             | KIRC | 0.009925525  |
| UPP2 | Mesenchymal cell          | KIRC | -0.150505915 |
| UPP2 | Mesenchymal stem cell     | KIRC | 0.025797569  |
| UPP2 | Metabolism of xenobiotic  | KIRC | 0.331299797  |
| UPP2 | Migrating cancer stem cel | KIRC | -0.046723414 |
| UPP2 | Mitotic_spindle           | KIRC | -0.189456078 |
| UPP2 | Monocyte                  | KIRC | 0.034365286  |
| UPP2 | Mtor_signaling_pathway    | KIRC | -0.115762526 |
| UPP2 | Mtorc1_signaling          | KIRC | 0.024119415  |
| UPP2 | Mucin type o-glycan biosy | KIRC | -0.081357419 |
| UPP2 | Myc_targets_v1            | KIRC | -0.034991104 |
| UPP2 | Myeloid cell              | KIRC | 0.049235041  |
| UPP2 | N-glycan biosynthesis     | KIRC | -0.009751523 |
| UPP2 | Naive b cell              | KIRC | 0.046646815  |

|      |                             |      |              |
|------|-----------------------------|------|--------------|
| UPP2 | Naive cd4+ t cell           | KIRC | -0.06577632  |
| UPP2 | Naive cd8+ t cell           | KIRC | -0.089062603 |
| UPP2 | Natural killer cell         | KIRC | 0.037367798  |
| UPP2 | Natural killer t (nkt) cell | KIRC | -0.01027251  |
| UPP2 | Natural regulatory t (treg) | KIRC | -0.021359429 |
| UPP2 | Neomycin, kanamycin and     | KIRC | -0.047243879 |
| UPP2 | Neutrophil                  | KIRC | 0.071797085  |
| UPP2 | Nicotinate and nicotinami   | KIRC | 0.254223568  |
| UPP2 | Nitrogen metabolism         | KIRC | 0.105325094  |
| UPP2 | Nod_like_receptor_signal    | KIRC | -0.007183347 |
| UPP2 | Notch_signaling             | KIRC | -0.01680587  |
| UPP2 | One carbon pool by folate   | KIRC | 0.16051349   |
| UPP2 | Other glycan degradation    | KIRC | 0.019913984  |
| UPP2 | Other types of o-glycan b   | KIRC | -0.063102733 |
| UPP2 | Oxidative phosphorylatio    | KIRC | 0.08800559   |
| UPP2 | P53_pathway                 | KIRC | 0.068719072  |
| UPP2 | P53_signaling_pathway       | KIRC | -0.031241041 |
| UPP2 | Pantothenate and coa bios   | KIRC | 0.176712342  |
| UPP2 | Pentose and glucuronate i   | KIRC | 0.332629943  |
| UPP2 | Pentose phosphate pathwa    | KIRC | 0.160502786  |
| UPP2 | Pericyte                    | KIRC | -0.024438528 |
| UPP2 | Phenylalanine metabolism    | KIRC | 0.304793921  |
| UPP2 | Phenylalanine, tyrosine ar  | KIRC | 0.141863114  |
| UPP2 | Phosphonate and phosphir    | KIRC | 0.106059828  |
| UPP2 | Pi3k_akt_activation         | KIRC | -0.107048892 |
| UPP2 | Pi3k_akt_mtor_signaling     | KIRC | 0.01818665   |
| UPP2 | Porphyrin and chlorophyl    | KIRC | 0.312412167  |
| UPP2 | Primary bile acid biosynt   | KIRC | 0.282716296  |
| UPP2 | Propanoate metabolism       | KIRC | 0.137875345  |
| UPP2 | Purine metabolism           | KIRC | -0.036884728 |
| UPP2 | Pyrimidine metabolism       | KIRC | 0.059932366  |
| UPP2 | Pyruvate metabolism         | KIRC | 0.18174605   |
| UPP2 | Regulation_of_autophagy     | KIRC | -0.095812062 |
| UPP2 | Retinol metabolism          | KIRC | 0.308175517  |
| UPP2 | Riboflavin metabolism       | KIRC | 0.18254587   |
| UPP2 | Schmahl_pdgf_signaling      | KIRC | 0.044937789  |
| UPP2 | Selenocompound metabol      | KIRC | 0.086285439  |
| UPP2 | Signaling_by_hippo          | KIRC | -0.095385211 |
| UPP2 | Sphingolipid metabolism     | KIRC | 0.064166609  |
| UPP2 | Starch and sucrose metab    | KIRC | 0.131913664  |
| UPP2 | Steroid biosynthesis        | KIRC | 0.029362302  |
| UPP2 | Steroid hormone biosynth    | KIRC | 0.367215108  |
| UPP2 | Sulfur metabolism           | KIRC | 0.16505882   |

|      |                            |      |              |
|------|----------------------------|------|--------------|
| UPP2 | Synthesis and degradation  | KIRC | 0.099291308  |
| UPP2 | T helper cell              | KIRC | 0.089618733  |
| UPP2 | T helper1 (th1) cell       | KIRC | 0.124060453  |
| UPP2 | T helper17 (th17) cell     | KIRC | 0.041681514  |
| UPP2 | T helper2 (th2) cell       | KIRC | 0.074869394  |
| UPP2 | T helper9 (th9) cell       | KIRC | 0.007146897  |
| UPP2 | Taurine and hypotaurine r  | KIRC | 0.044812011  |
| UPP2 | Terpenoid backbone biosy   | KIRC | 0.110324765  |
| UPP2 | Tgf_beta_signaling_pathw   | KIRC | -0.121826778 |
| UPP2 | Thiamine metabolism        | KIRC | 0.128536976  |
| UPP2 | Tnfa_signaling_via_nfkbc   | KIRC | 0.005999628  |
| UPP2 | Tryptophan metabolism      | KIRC | 0.238233691  |
| UPP2 | Tumor endothelial cell     | KIRC | 0.015257804  |
| UPP2 | Tyrosine metabolism        | KIRC | 0.305479259  |
| UPP2 | Ubiquinone and other terp  | KIRC | 0.136059713  |
| UPP2 | Valine, leucine and isoleu | KIRC | 0.01553438   |
| UPP2 | Valine, leucine and isoleu | KIRC | 0.166284271  |
| UPP2 | Vascular endothelial cell  | KIRC | 0.047741518  |
| UPP2 | Vascular smooth muscle c   | KIRC | -0.082049293 |
| UPP2 | Vegf_signaling_pathway     | KIRC | -0.133672324 |
| UPP2 | Vitamin b6 metabolism      | KIRC | 0.196374129  |
| UPP2 | Willert_wnt_signaling      | KIRC | 0.010177055  |
| UPP2 | Wnt_beta_catenin_signali   | KIRC | -0.226186287 |
| CDA  | Abnormal plasma cell       | KIRP | 0.271606164  |
| CDA  | Activated b cell           | KIRP | 0.331431154  |
| CDA  | Activated cd4+ t cell      | KIRP | 0.340411904  |
| CDA  | Activated t cell           | KIRP | 0.373620291  |
| CDA  | Alanine, aspartate and glu | KIRP | -0.205075508 |
| CDA  | Alcala_apoptosis           | KIRP | 0.142639202  |
| CDA  | Alpha-linolenic acid meta  | KIRP | 0.287642438  |
| CDA  | Amino sugar and nucleoti   | KIRP | 0.116377805  |
| CDA  | Ampk_pathway               | KIRP | -0.043624152 |
| CDA  | Angiogenesis               | KIRP | 0.280530526  |
| CDA  | Arachidonic acid metabol   | KIRP | 0.38534305   |
| CDA  | Arginine and proline metæ  | KIRP | -0.021994783 |
| CDA  | Arginine biosynthesis      | KIRP | -0.07214855  |
| CDA  | Ascorbate and aldarate mε  | KIRP | -0.173343442 |
| CDA  | Atypical memory b cell     | KIRP | 0.20573206   |
| CDA  | Axl+siglec6+ dendritic ce  | KIRP | 0.2545066    |
| CDA  | B cell                     | KIRP | 0.321769922  |
| CDA  | B1 cell                    | KIRP | 0.345966329  |
| CDA  | Basal cell                 | KIRP | 0.345798517  |
| CDA  | Beta-alanine metabolism    | KIRP | -0.166563653 |

|     |                             |      |              |
|-----|-----------------------------|------|--------------|
| CDA | Biosynthesis of unsaturate  | KIRP | -0.046521631 |
| CDA | Biotin metabolism           | KIRP | -0.153854494 |
| CDA | Butanoate metabolism        | KIRP | -0.306165975 |
| CDA | Caffeine metabolism         | KIRP | 0.060613487  |
| CDA | Cancer stem cell            | KIRP | 0.32751956   |
| CDA | Cancer stem-like cell       | KIRP | 0.263384104  |
| CDA | Cd4+ cytotoxic t cell       | KIRP | 0.422108691  |
| CDA | Cd4+ memory t cell          | KIRP | 0.338047575  |
| CDA | Cd4+ regulatory t cell      | KIRP | 0.372319085  |
| CDA | Cd4+ t helper cell          | KIRP | 0.378111045  |
| CDA | Cd4+cd25+ regulatory t c    | KIRP | 0.380844001  |
| CDA | Cd8+ cytotoxic t cell       | KIRP | 0.340174229  |
| CDA | Cd8+ regulatory t cell      | KIRP | 0.318915697  |
| CDA | Cell_cycle                  | KIRP | -0.048463035 |
| CDA | Chandran_metastasis_top5    | KIRP | -0.269073194 |
| CDA | Citrate cycle (tca cycle)   | KIRP | -0.20247294  |
| CDA | Cysteine and methionine r   | KIRP | -0.169300648 |
| CDA | Cytokine induced killer cε  | KIRP | 0.408951621  |
| CDA | D-arginine and d-ornithin   | KIRP | -0.16472074  |
| CDA | D-glutamine and d-glutan    | KIRP | -0.362701352 |
| CDA | Dendritic cell              | KIRP | 0.391032702  |
| CDA | Dna_repair                  | KIRP | 0.025590424  |
| CDA | Dna_replication             | KIRP | -0.126977802 |
| CDA | Double-negative memory      | KIRP | 0.293006892  |
| CDA | Drug metabolism - cytoch    | KIRP | -0.049774887 |
| CDA | Drug metabolism - other c   | KIRP | 0.126408137  |
| CDA | E2f_targets                 | KIRP | -0.084501343 |
| CDA | Ecm_receptor_interaction    | KIRP | 0.267790584  |
| CDA | Effector cd4+ memory t (    | KIRP | 0.308603093  |
| CDA | Effector cd8+ memory t (    | KIRP | 0.378356977  |
| CDA | Effector memory t cell      | KIRP | 0.394490627  |
| CDA | Effector regulatory t (treg | KIRP | 0.380236392  |
| CDA | Elvidge_hif1a_targets_up    | KIRP | -0.050747241 |
| CDA | Endothelial cell            | KIRP | 0.418693484  |
| CDA | Eosinophil                  | KIRP | 0.397678492  |
| CDA | Ether lipid metabolism      | KIRP | 0.169890038  |
| CDA | Exhausted cd4+ t cell       | KIRP | 0.369545293  |
| CDA | Exhausted cd8+ t cell       | KIRP | 0.415503627  |
| CDA | Exhausted t cell            | KIRP | 0.335276542  |
| CDA | Fat cell (adipocyte)        | KIRP | -0.165609512 |
| CDA | Fatty acid biosynthesis     | KIRP | 0.072318837  |
| CDA | Fatty acid degradation      | KIRP | -0.09636314  |
| CDA | Fatty acid elongation       | KIRP | -0.031053948 |

|     |                              |      |              |
|-----|------------------------------|------|--------------|
| CDA | Fibroblast                   | KIRP | 0.449711328  |
| CDA | Folate biosynthesis          | KIRP | -0.014487233 |
| CDA | Follicular b cell            | KIRP | 0.414568986  |
| CDA | Follicular dendritic cell    | KIRP | 0.244448362  |
| CDA | Follicular helper (tfh) t ce | KIRP | 0.329799615  |
| CDA | Follicular t cell            | KIRP | 0.252891846  |
| CDA | Foxp3+il-17+ t cell          | KIRP | 0.207089433  |
| CDA | Fructose and mannose me      | KIRP | 0.147410719  |
| CDA | G2m_checkpoint               | KIRP | -0.049423651 |
| CDA | Galactose metabolism         | KIRP | 0.065355546  |
| CDA | Galie_tumor_stemness_ge      | KIRP | 0.034198947  |
| CDA | Glutathione metabolism       | KIRP | 0.095524305  |
| CDA | Glycerolipid metabolism      | KIRP | 0.078574521  |
| CDA | Glycerophospholipid metæ     | KIRP | 0.171340237  |
| CDA | Glycine, serine and threor   | KIRP | -0.23217579  |
| CDA | Glycolysis / gluconeogene    | KIRP | -0.050599925 |
| CDA | Glycosaminoglycan biosy1     | KIRP | 0.287008449  |
| CDA | Glycosaminoglycan biosy1     | KIRP | 0.0640952    |
| CDA | Glycosaminoglycan biosy1     | KIRP | 0.370219188  |
| CDA | Glycosaminoglycan degra      | KIRP | -0.029667833 |
| CDA | Glycosphingolipid biosyn1    | KIRP | 0.325690346  |
| CDA | Glycosphingolipid biosyn1    | KIRP | 0.290814652  |
| CDA | Glycosphingolipid biosyn1    | KIRP | 0.261536724  |
| CDA | Glycosylphosphatidylinos:    | KIRP | -0.281145098 |
| CDA | Glyoxylate and dicarboxy     | KIRP | -0.19746663  |
| CDA | Granulocyte                  | KIRP | 0.327338466  |
| CDA | Hedgehog_signaling           | KIRP | 0.038337609  |
| CDA | Histidine metabolism         | KIRP | -0.233753147 |
| CDA | Hypoxia                      | KIRP | 0.376695525  |
| CDA | Il-17ralpha t cell           | KIRP | 0.345256426  |
| CDA | Il2_stat5_signaling          | KIRP | 0.433258564  |
| CDA | Il6_jak_stat3_signaling      | KIRP | 0.425551989  |
| CDA | Immune_checkpoints_tunr      | KIRP | 0.32125331   |
| CDA | Immune_inhibition_cytok      | KIRP | 0.463147587  |
| CDA | Inositol phosphate metabo    | KIRP | -0.041960378 |
| CDA | Interleukin_6_signaling      | KIRP | -0.021863058 |
| CDA | Jaeger_metastasis_up         | KIRP | 0.012956548  |
| CDA | Jain_nfkb_signaling          | KIRP | -0.121816749 |
| CDA | Kras_signaling_up            | KIRP | 0.376453337  |
| CDA | Linoleic acid metabolism     | KIRP | 0.315349868  |
| CDA | Lipoic acid metabolism       | KIRP | 0.018209272  |
| CDA | Lysine degradation           | KIRP | -0.414079209 |
| CDA | Lysosome                     | KIRP | 0.062652471  |

|     |                             |      |              |
|-----|-----------------------------|------|--------------|
| CDA | M1 macrophage               | KIRP | 0.39837337   |
| CDA | M2 macrophage               | KIRP | 0.351802529  |
| CDA | Mannose type o-glycan bi    | KIRP | -0.161721776 |
| CDA | Mapk_signaling_pathway      | KIRP | 0.306162904  |
| CDA | Mapk3_erk1_activation       | KIRP | 0.027050142  |
| CDA | Marginal zone b cell        | KIRP | 0.300287035  |
| CDA | Memory b cell               | KIRP | 0.379919568  |
| CDA | Mesenchymal cell            | KIRP | 0.35342222   |
| CDA | Mesenchymal stem cell       | KIRP | 0.448847554  |
| CDA | Metabolism of xenobiotic    | KIRP | 0.039822515  |
| CDA | Migrating cancer stem cel   | KIRP | 0.164256928  |
| CDA | Mitotic_spindle             | KIRP | -0.214620927 |
| CDA | Monocyte                    | KIRP | 0.458362335  |
| CDA | Mtor_signaling_pathway      | KIRP | 0.009574933  |
| CDA | Mtorc1_signaling            | KIRP | 0.065447137  |
| CDA | Mucin type o-glycan biosy   | KIRP | -0.089618811 |
| CDA | Myc_targets_v1              | KIRP | -0.023992856 |
| CDA | Myeloid cell                | KIRP | 0.368929741  |
| CDA | N-glycan biosynthesis       | KIRP | -0.044276349 |
| CDA | Naive b cell                | KIRP | 0.292679775  |
| CDA | Naive cd4+ t cell           | KIRP | 0.383978785  |
| CDA | Naive cd8+ t cell           | KIRP | 0.406831583  |
| CDA | Natural killer cell         | KIRP | 0.417892227  |
| CDA | Natural killer t (nkt) cell | KIRP | 0.312755302  |
| CDA | Natural regulatory t (treg) | KIRP | 0.377413155  |
| CDA | Neomycin, kanamycin and     | KIRP | 0.302927516  |
| CDA | Neutrophil                  | KIRP | 0.501280281  |
| CDA | Nicotinate and nicotinami   | KIRP | -0.118614071 |
| CDA | Nitrogen metabolism         | KIRP | -0.009068112 |
| CDA | Nod_like_receptor_signal    | KIRP | 0.417844293  |
| CDA | Notch_signaling             | KIRP | 0.035424035  |
| CDA | One carbon pool by folate   | KIRP | -0.248983705 |
| CDA | Other glycan degradation    | KIRP | -0.13351666  |
| CDA | Other types of o-glycan b   | KIRP | -0.032934489 |
| CDA | Oxidative phosphorylatio    | KIRP | 0.085299116  |
| CDA | P53_pathway                 | KIRP | 0.373376817  |
| CDA | P53_signaling_pathway       | KIRP | 0.139835923  |
| CDA | Pantothenate and coa bios   | KIRP | 0.076425564  |
| CDA | Pentose and glucuronate i   | KIRP | -0.146586063 |
| CDA | Pentose phosphate pathwa    | KIRP | 0.01643855   |
| CDA | Pericyte                    | KIRP | 0.484934985  |
| CDA | Phenylalanine metabolism    | KIRP | -0.030641494 |
| CDA | Phenylalanine, tyrosine ar  | KIRP | -0.047926206 |

|     |                            |      |              |
|-----|----------------------------|------|--------------|
| CDA | Phosphonate and phosphir   | KIRP | -0.091413116 |
| CDA | Pi3k_akt_activation        | KIRP | -0.030109317 |
| CDA | Pi3k_akt_mtor_signaling    | KIRP | 0.145915561  |
| CDA | Porphyrin and chlorophyl   | KIRP | -0.08908401  |
| CDA | Primary bile acid biosynt  | KIRP | -0.043459555 |
| CDA | Propanoate metabolism      | KIRP | -0.272472022 |
| CDA | Purine metabolism          | KIRP | 0.095305904  |
| CDA | Pyrimidine metabolism      | KIRP | -0.054609281 |
| CDA | Pyruvate metabolism        | KIRP | -0.175398757 |
| CDA | Regulation_of_autophagy    | KIRP | -0.083007224 |
| CDA | Retinol metabolism         | KIRP | -0.054618155 |
| CDA | Riboflavin metabolism      | KIRP | 0.003084957  |
| CDA | Schmahl_pdgf_signaling     | KIRP | 0.058925495  |
| CDA | Selenocompound metabol     | KIRP | -0.264177005 |
| CDA | Signaling_by_hippo         | KIRP | -0.369443548 |
| CDA | Sphingolipid metabolism    | KIRP | -0.258958707 |
| CDA | Starch and sucrose metab   | KIRP | -0.024943018 |
| CDA | Steroid biosynthesis       | KIRP | -0.019100074 |
| CDA | Steroid hormone biosynth   | KIRP | -0.062392161 |
| CDA | Sulfur metabolism          | KIRP | -0.225406792 |
| CDA | Synthesis and degradation  | KIRP | -0.345528776 |
| CDA | T helper cell              | KIRP | 0.359269395  |
| CDA | T helper1 (th1) cell       | KIRP | 0.26162932   |
| CDA | T helper17 (th17) cell     | KIRP | 0.384561967  |
| CDA | T helper2 (th2) cell       | KIRP | 0.381631102  |
| CDA | T helper9 (th9) cell       | KIRP | 0.496692036  |
| CDA | Taurine and hypotaurine r  | KIRP | 0.151218956  |
| CDA | Terpenoid backbone biosy   | KIRP | -0.175045008 |
| CDA | Tgf_beta_signaling_pathw   | KIRP | -0.093856213 |
| CDA | Thiamine metabolism        | KIRP | -0.172328669 |
| CDA | Tnfa_signaling_via_nfb     | KIRP | 0.394468851  |
| CDA | Tryptophan metabolism      | KIRP | -0.101999108 |
| CDA | Tumor endothelial cell     | KIRP | 0.122321016  |
| CDA | Tyrosine metabolism        | KIRP | -0.029080037 |
| CDA | Ubiquinone and other ter   | KIRP | -0.162224205 |
| CDA | Valine, leucine and isoleu | KIRP | 0.161283683  |
| CDA | Valine, leucine and isoleu | KIRP | -0.251661952 |
| CDA | Vascular endothelial cell  | KIRP | 0.579047383  |
| CDA | Vascular smooth muscle c   | KIRP | 0.407604402  |
| CDA | Vegf_signaling_pathway     | KIRP | 0.384883159  |
| CDA | Vitamin b6 metabolism      | KIRP | -0.128251941 |
| CDA | Willert_wnt_signaling      | KIRP | -0.099274911 |
| CDA | Wnt_beta_catenin_signali   | KIRP | 0.069465221  |

|      |                                      |      |              |
|------|--------------------------------------|------|--------------|
| UCK1 | Abnormal plasma cell                 | KIRP | -0.093568448 |
| UCK1 | Activated b cell                     | KIRP | 0.02724922   |
| UCK1 | Activated cd4+ t cell                | KIRP | -0.166660016 |
| UCK1 | Activated t cell                     | KIRP | -0.079497724 |
| UCK1 | Alanine, aspartate and glu           | KIRP | -0.069486598 |
| UCK1 | Alcala_apoptosis                     | KIRP | 0.063750137  |
| UCK1 | Alpha-linolenic acid meta            | KIRP | 0.224429186  |
| UCK1 | Amino sugar and nucleoti             | KIRP | 0.033284222  |
| UCK1 | Ampk_pathway                         | KIRP | 0.048648608  |
| UCK1 | Angiogenesis                         | KIRP | -0.188534796 |
| UCK1 | Arachidonic acid metabol             | KIRP | 0.197009828  |
| UCK1 | Arginine and proline metε            | KIRP | 0.127014156  |
| UCK1 | Arginine biosynthesis                | KIRP | -0.094330192 |
| UCK1 | Ascorbate and aldarate mε            | KIRP | 0.010996228  |
| UCK1 | Atypical memory b cell               | KIRP | -0.051370829 |
| UCK1 | Axl+siglec6+ dendritic ce            | KIRP | -0.106649101 |
| UCK1 | B cell                               | KIRP | -0.123563073 |
| UCK1 | B1 cell                              | KIRP | 0.024465039  |
| UCK1 | Basal cell                           | KIRP | -0.205765401 |
| UCK1 | Beta-alanine metabolism              | KIRP | 0.045931805  |
| UCK1 | Biosynthesis of unsaturate           | KIRP | 0.083635483  |
| UCK1 | Biotin metabolism                    | KIRP | -0.069230089 |
| UCK1 | Butanoate metabolism                 | KIRP | 0.090288665  |
| UCK1 | Caffeine metabolism                  | KIRP | -0.118715928 |
| UCK1 | Cancer stem cell                     | KIRP | -0.344526757 |
| UCK1 | Cancer stem-like cell                | KIRP | -0.074381863 |
| UCK1 | Cd4+ cytotoxic t cell                | KIRP | -0.013988603 |
| UCK1 | Cd4+ memory t cell                   | KIRP | -0.199899788 |
| UCK1 | Cd4+ regulatory t cell               | KIRP | -0.060039598 |
| UCK1 | Cd4+ t helper cell                   | KIRP | -0.037968277 |
| UCK1 | Cd4+cd25+ regulatory t c             | KIRP | -0.063258819 |
| UCK1 | Cd8+ cytotoxic t cell                | KIRP | 0.029546541  |
| UCK1 | Cd8+ regulatory t cell               | KIRP | -0.023857992 |
| UCK1 | Cell_cycle                           | KIRP | -0.294471935 |
| UCK1 | Chandran_metastasis_top <sup>5</sup> | KIRP | -0.37974389  |
| UCK1 | Citrate cycle (tca cycle)            | KIRP | 0.040105747  |
| UCK1 | Cysteine and methionine r            | KIRP | -0.020381444 |
| UCK1 | Cytokine induced killer cε           | KIRP | 0.039498916  |
| UCK1 | D-arginine and d-ornithin            | KIRP | 0.207098477  |
| UCK1 | D-glutamine and d-glutan             | KIRP | -0.394220318 |
| UCK1 | Dendritic cell                       | KIRP | -0.094858974 |
| UCK1 | Dna_repair                           | KIRP | 0.351638826  |
| UCK1 | Dna_replication                      | KIRP | -0.000790438 |



|      |                                   |              |
|------|-----------------------------------|--------------|
| UCK1 | Double-negative memory KIRP       | -0.001451499 |
| UCK1 | Drug metabolism - cytoch KIRP     | 0.164895145  |
| UCK1 | Drug metabolism - other ( KIRP    | 0.238216628  |
| UCK1 | E2f_targets KIRP                  | -0.218469434 |
| UCK1 | Ecm_receptor_interaction KIRP     | -0.331201663 |
| UCK1 | Effector cd4+ memory t ( KIRP     | -0.288859364 |
| UCK1 | Effector cd8+ memory t ( KIRP     | -0.040914968 |
| UCK1 | Effector memory t cell KIRP       | -0.159001149 |
| UCK1 | Effector regulatory t (treg KIRP  | -0.142311483 |
| UCK1 | Elvidge_hif1a_targets_up KIRP     | -0.225081572 |
| UCK1 | Endothelial cell KIRP             | -0.3362002   |
| UCK1 | Eosinophil KIRP                   | -0.034575045 |
| UCK1 | Ether lipid metabolism KIRP       | 0.002054148  |
| UCK1 | Exhausted cd4+ t cell KIRP        | -0.225707945 |
| UCK1 | Exhausted cd8+ t cell KIRP        | -0.150617466 |
| UCK1 | Exhausted t cell KIRP             | 0.061873304  |
| UCK1 | Fat cell (adipocyte) KIRP         | 0.19477579   |
| UCK1 | Fatty acid biosynthesis KIRP      | -0.120651729 |
| UCK1 | Fatty acid degradation KIRP       | 0.016445349  |
| UCK1 | Fatty acid elongation KIRP        | 0.038851272  |
| UCK1 | Fibroblast KIRP                   | -0.268014628 |
| UCK1 | Folate biosynthesis KIRP          | 0.204091004  |
| UCK1 | Follicular b cell KIRP            | -0.144403604 |
| UCK1 | Follicular dendritic cell KIRP    | -0.102794248 |
| UCK1 | Follicular helper (tfh) t ce KIRP | -0.133580819 |
| UCK1 | Follicular t cell KIRP            | 0.12492067   |
| UCK1 | Foxp3+il-17+ t cell KIRP          | -0.054159729 |
| UCK1 | Fructose and mannose me KIRP      | 0.108887547  |
| UCK1 | G2m_checkpoint KIRP               | -0.348202225 |
| UCK1 | Galactose metabolism KIRP         | 0.072482978  |
| UCK1 | Galie_tumor_stemness_ge KIRP      | -0.207188955 |
| UCK1 | Glutathione metabolism KIRP       | 0.117728753  |
| UCK1 | Glycerolipid metabolism KIRP      | 0.122248907  |
| UCK1 | Glycerophospholipid metε KIRP     | 0.248404559  |
| UCK1 | Glycine, serine and threor KIRP   | 0.186677854  |
| UCK1 | Glycolysis / gluconeogene KIRP    | 0.020101206  |
| UCK1 | Glycosaminoglycan biosy KIRP      | 0.105717042  |
| UCK1 | Glycosaminoglycan biosy KIRP      | -0.01248155  |
| UCK1 | Glycosaminoglycan biosy KIRP      | -0.029298341 |
| UCK1 | Glycosaminoglycan degra KIRP      | 0.039160768  |
| UCK1 | Glycosphingolipid biosyn KIRP     | -0.02224991  |
| UCK1 | Glycosphingolipid biosyn KIRP     | 0.017704867  |
| UCK1 | Glycosphingolipid biosyn KIRP     | 0.100191972  |

|      |                                    |      |              |
|------|------------------------------------|------|--------------|
| UCK1 | Glycosylphosphatidylinositol       | KIRP | -0.068375462 |
| UCK1 | Glyoxylate and dicarboxylate       | KIRP | 0.126577075  |
| UCK1 | Granulocyte                        | KIRP | -0.021207728 |
| UCK1 | Hedgehog signaling                 | KIRP | -0.293374718 |
| UCK1 | Histidine metabolism               | KIRP | 0.211346024  |
| UCK1 | Hypoxia                            | KIRP | -0.168087291 |
| UCK1 | Il-17alpha t cell                  | KIRP | -0.053190808 |
| UCK1 | Il2_stat5_signaling                | KIRP | -0.165524273 |
| UCK1 | Il6_jak_stat3_signaling            | KIRP | -0.202059423 |
| UCK1 | Immune checkpoints tumor           | KIRP | -0.221648895 |
| UCK1 | Immune inhibition cytokine         | KIRP | 0.09812748   |
| UCK1 | Inositol phosphate metabolism      | KIRP | -0.396286225 |
| UCK1 | Interleukin_6_signaling            | KIRP | -0.534500347 |
| UCK1 | Jaeger metastasis up               | KIRP | -0.230223661 |
| UCK1 | Jain_nfkb_signaling                | KIRP | -0.102598448 |
| UCK1 | Kras_signaling_up                  | KIRP | -0.245777365 |
| UCK1 | Linoleic acid metabolism           | KIRP | 0.206981921  |
| UCK1 | Lipoic acid metabolism             | KIRP | 0.312635938  |
| UCK1 | Lysine degradation                 | KIRP | 0.033758276  |
| UCK1 | Lysosome                           | KIRP | 0.045506114  |
| UCK1 | M1 macrophage                      | KIRP | -0.096997349 |
| UCK1 | M2 macrophage                      | KIRP | -0.028391825 |
| UCK1 | Mannose type o-glycan biosynthesis | KIRP | 0.301661809  |
| UCK1 | Mapk_signaling_pathway             | KIRP | -0.239076761 |
| UCK1 | Mapk3_erk1_activation              | KIRP | -0.487118846 |
| UCK1 | Marginal zone b cell               | KIRP | -0.206548631 |
| UCK1 | Memory b cell                      | KIRP | -0.072968902 |
| UCK1 | Mesenchymal cell                   | KIRP | -0.052338252 |
| UCK1 | Mesenchymal stem cell              | KIRP | -0.265564495 |
| UCK1 | Metabolism of xenobiotics          | KIRP | 0.202826955  |
| UCK1 | Migrating cancer stem cell         | KIRP | -0.295530861 |
| UCK1 | Mitotic_spindle                    | KIRP | -0.490460432 |
| UCK1 | Monocyte                           | KIRP | -0.021855023 |
| UCK1 | Mtor_signaling_pathway             | KIRP | -0.192604226 |
| UCK1 | Mtorc1_signaling                   | KIRP | -0.180006603 |
| UCK1 | Mucin type o-glycan biosynthesis   | KIRP | -0.512177794 |
| UCK1 | Myc_targets_v1                     | KIRP | 0.018695874  |
| UCK1 | Myeloid cell                       | KIRP | -0.086834195 |
| UCK1 | N-glycan biosynthesis              | KIRP | -0.146260127 |
| UCK1 | Naive b cell                       | KIRP | -0.038953973 |
| UCK1 | Naive cd4+ t cell                  | KIRP | -0.275030077 |
| UCK1 | Naive cd8+ t cell                  | KIRP | -0.222315531 |
| UCK1 | Natural killer cell                | KIRP | -0.050592426 |

|      |                             |      |              |
|------|-----------------------------|------|--------------|
| UCK1 | Natural killer t (nkt) cell | KIRP | -0.174440477 |
| UCK1 | Natural regulatory t (treg) | KIRP | -0.14719403  |
| UCK1 | Neomycin, kanamycin and     | KIRP | -0.062134267 |
| UCK1 | Neutrophil                  | KIRP | -0.086180089 |
| UCK1 | Nicotinate and nicotinami   | KIRP | 0.028752414  |
| UCK1 | Nitrogen metabolism         | KIRP | -0.192268298 |
| UCK1 | Nod_like_receptor_signal    | KIRP | -0.228675764 |
| UCK1 | Notch_signaling             | KIRP | -0.119661192 |
| UCK1 | One carbon pool by folate   | KIRP | -0.062895714 |
| UCK1 | Other glycan degradation    | KIRP | 0.003145793  |
| UCK1 | Other types of o-glycan b   | KIRP | 0.27861629   |
| UCK1 | Oxidative phosphorylatio    | KIRP | 0.369577293  |
| UCK1 | P53_pathway                 | KIRP | 0.05891713   |
| UCK1 | P53_signaling_pathway       | KIRP | -0.327584534 |
| UCK1 | Pantothenate and coa bios   | KIRP | 0.035749224  |
| UCK1 | Pentose and glucuronate i   | KIRP | -0.023293741 |
| UCK1 | Pentose phosphate pathwa    | KIRP | 0.01464124   |
| UCK1 | Pericyte                    | KIRP | -0.139820433 |
| UCK1 | Phenylalanine metabolism    | KIRP | 0.200084056  |
| UCK1 | Phenylalanine, tyrosine ar  | KIRP | 0.122539631  |
| UCK1 | Phosphonate and phosphir    | KIRP | -0.009578579 |
| UCK1 | Pi3k_akt_activation         | KIRP | -0.393452665 |
| UCK1 | Pi3k_akt_mtor_signaling     | KIRP | -0.246297644 |
| UCK1 | Porphyrin and chlorophyl    | KIRP | 0.114890443  |
| UCK1 | Primary bile acid biosynt   | KIRP | 0.165699265  |
| UCK1 | Propanoate metabolism       | KIRP | -0.096765388 |
| UCK1 | Purine metabolism           | KIRP | 0.032095444  |
| UCK1 | Pyrimidine metabolism       | KIRP | 0.204963568  |
| UCK1 | Pyruvate metabolism         | KIRP | 0.093174416  |
| UCK1 | Regulation_of_autophagy     | KIRP | -0.032807484 |
| UCK1 | Retinol metabolism          | KIRP | 0.158916752  |
| UCK1 | Riboflavin metabolism       | KIRP | 0.27475576   |
| UCK1 | Schmahl_pdgf_signaling      | KIRP | -0.321671663 |
| UCK1 | Selenocompound metabol      | KIRP | -0.134562921 |
| UCK1 | Signaling_by_hippo          | KIRP | -0.490603442 |
| UCK1 | Sphingolipid metabolism     | KIRP | -0.276051762 |
| UCK1 | Starch and sucrose metabo   | KIRP | 0.103618158  |
| UCK1 | Steroid biosynthesis        | KIRP | 0.111852424  |
| UCK1 | Steroid hormone biosynth    | KIRP | 0.0723075    |
| UCK1 | Sulfur metabolism           | KIRP | -0.133745401 |
| UCK1 | Synthesis and degradation   | KIRP | 0.129660389  |
| UCK1 | T helper cell               | KIRP | -0.091707662 |
| UCK1 | T helper1 (th1) cell        | KIRP | 0.046910024  |

|      |                            |      |              |
|------|----------------------------|------|--------------|
| UCK1 | T helper17 (th17) cell     | KIRP | -0.15653236  |
| UCK1 | T helper2 (th2) cell       | KIRP | -0.171444722 |
| UCK1 | T helper9 (th9) cell       | KIRP | -0.095221427 |
| UCK1 | Taurine and hypotaurine r  | KIRP | 0.013494809  |
| UCK1 | Terpenoid backbone biosy   | KIRP | 0.094635944  |
| UCK1 | Tgf_beta_signaling_pathw   | KIRP | -0.400138826 |
| UCK1 | Thiamine metabolism        | KIRP | 0.235758342  |
| UCK1 | Tnfa_signaling_via_nfkb    | KIRP | -0.205754761 |
| UCK1 | Tryptophan metabolism      | KIRP | 0.137991216  |
| UCK1 | Tumor endothelial cell     | KIRP | -0.204388093 |
| UCK1 | Tyrosine metabolism        | KIRP | 0.228801431  |
| UCK1 | Ubiquinone and other terf  | KIRP | -0.047072138 |
| UCK1 | Valine, leucine and isoleu | KIRP | 0.225955575  |
| UCK1 | Valine, leucine and isoleu | KIRP | 0.031278425  |
| UCK1 | Vascular endothelial cell  | KIRP | -0.048689413 |
| UCK1 | Vascular smooth muscle c   | KIRP | -0.123522809 |
| UCK1 | Vegf_signaling_pathway     | KIRP | -0.009507032 |
| UCK1 | Vitamin b6 metabolism      | KIRP | 0.162951019  |
| UCK1 | Willert_wnt_signaling      | KIRP | -0.118314403 |
| UCK1 | Wnt_beta_catenin_signali   | KIRP | -0.093813588 |
| UCK2 | Abnormal plasma cell       | KIRP | 0.287534166  |
| UCK2 | Activated b cell           | KIRP | 0.11947253   |
| UCK2 | Activated cd4+ t cell      | KIRP | 0.153847538  |
| UCK2 | Activated t cell           | KIRP | 0.271936496  |
| UCK2 | Alanine, aspartate and glu | KIRP | 0.127666001  |
| UCK2 | Alcala_apoptosis           | KIRP | 0.337575682  |
| UCK2 | Alpha-linolenic acid meta  | KIRP | 0.071104452  |
| UCK2 | Amino sugar and nucleoti   | KIRP | 0.331919985  |
| UCK2 | Ampk_pathway               | KIRP | 0.214745245  |
| UCK2 | Angiogenesis               | KIRP | 0.063172351  |
| UCK2 | Arachidonic acid metabol:  | KIRP | 0.231175434  |
| UCK2 | Arginine and proline metæ  | KIRP | 0.175779984  |
| UCK2 | Arginine biosynthesis      | KIRP | -0.0357591   |
| UCK2 | Ascorbate and aldarate mε  | KIRP | 0.27050523   |
| UCK2 | Atypical memory b cell     | KIRP | 0.33818609   |
| UCK2 | Axl+siglec6+ dendritic ce  | KIRP | -0.063643453 |
| UCK2 | B cell                     | KIRP | 0.160244011  |
| UCK2 | B1 cell                    | KIRP | 0.129224863  |
| UCK2 | Basal cell                 | KIRP | 0.277701025  |
| UCK2 | Beta-alanine metabolism    | KIRP | -0.062225104 |
| UCK2 | Biosynthesis of unsaturate | KIRP | 0.121506397  |
| UCK2 | Biotin metabolism          | KIRP | -0.196849599 |
| UCK2 | Butanoate metabolism       | KIRP | -0.251909953 |

|      |                             |      |              |
|------|-----------------------------|------|--------------|
| UCK2 | Caffeine metabolism         | KIRP | 0.065082203  |
| UCK2 | Cancer stem cell            | KIRP | 0.115048162  |
| UCK2 | Cancer stem-like cell       | KIRP | -0.227679931 |
| UCK2 | Cd4+ cytotoxic t cell       | KIRP | 0.095077459  |
| UCK2 | Cd4+ memory t cell          | KIRP | 0.178567048  |
| UCK2 | Cd4+ regulatory t cell      | KIRP | 0.156675592  |
| UCK2 | Cd4+ t helper cell          | KIRP | 0.112652912  |
| UCK2 | Cd4+cd25+ regulatory t c    | KIRP | 0.126335167  |
| UCK2 | Cd8+ cytotoxic t cell       | KIRP | 0.112898353  |
| UCK2 | Cd8+ regulatory t cell      | KIRP | 0.174702107  |
| UCK2 | Cell_cycle                  | KIRP | 0.544277577  |
| UCK2 | Chandran_metastasis_top5    | KIRP | 0.385949783  |
| UCK2 | Citrate cycle (tca cycle)   | KIRP | -0.125557004 |
| UCK2 | Cysteine and methionine r   | KIRP | 0.253905844  |
| UCK2 | Cytokine induced killer c   | KIRP | 0.177892737  |
| UCK2 | D-arginine and d-ornithin   | KIRP | -0.106194251 |
| UCK2 | D-glutamine and d-glutan    | KIRP | -0.28426491  |
| UCK2 | Dendritic cell              | KIRP | 0.064555692  |
| UCK2 | Dna_repair                  | KIRP | 0.326252939  |
| UCK2 | Dna_replication             | KIRP | 0.445729288  |
| UCK2 | Double-negative memory      | KIRP | 0.19992597   |
| UCK2 | Drug metabolism - cytoch    | KIRP | 0.119212891  |
| UCK2 | Drug metabolism - other c   | KIRP | 0.369286002  |
| UCK2 | E2f_targets                 | KIRP | 0.603084451  |
| UCK2 | Ecm_receptor_interaction    | KIRP | 0.215713424  |
| UCK2 | Effector cd4+ memory t (    | KIRP | 0.13597484   |
| UCK2 | Effector cd8+ memory t (    | KIRP | -0.000367189 |
| UCK2 | Effector memory t cell      | KIRP | 0.158918016  |
| UCK2 | Effector regulatory t (treg | KIRP | 0.157413647  |
| UCK2 | Elvidge_hif1a_targets_up    | KIRP | 0.430446973  |
| UCK2 | Endothelial cell            | KIRP | 0.236363661  |
| UCK2 | Eosinophil                  | KIRP | 0.073434467  |
| UCK2 | Ether lipid metabolism      | KIRP | -0.039823826 |
| UCK2 | Exhausted cd4+ t cell       | KIRP | 0.233569637  |
| UCK2 | Exhausted cd8+ t cell       | KIRP | 0.183612639  |
| UCK2 | Exhausted t cell            | KIRP | 0.154610257  |
| UCK2 | Fat cell (adipocyte)        | KIRP | -0.125410531 |
| UCK2 | Fatty acid biosynthesis     | KIRP | 0.027925594  |
| UCK2 | Fatty acid degradation      | KIRP | -0.107634004 |
| UCK2 | Fatty acid elongation       | KIRP | 0.094520186  |
| UCK2 | Fibroblast                  | KIRP | 0.344146558  |
| UCK2 | Folate biosynthesis         | KIRP | 0.326527303  |
| UCK2 | Follicular b cell           | KIRP | 0.193065883  |

|      |                                           |      |              |
|------|-------------------------------------------|------|--------------|
| UCK2 | Follicular dendritic cell                 | KIRP | 0.073616125  |
| UCK2 | Follicular helper (tfh) t cell            | KIRP | 0.183469531  |
| UCK2 | Follicular t cell                         | KIRP | 0.198691883  |
| UCK2 | Foxp3+il-17+ t cell                       | KIRP | 0.298641141  |
| UCK2 | Fructose and mannose metabolism           | KIRP | 0.270430787  |
| UCK2 | G2m_checkpoint                            | KIRP | 0.56997766   |
| UCK2 | Galactose metabolism                      | KIRP | 0.159242599  |
| UCK2 | Galie_tumor_stemness_gene                 | KIRP | -0.172502438 |
| UCK2 | Glutathione metabolism                    | KIRP | 0.419854939  |
| UCK2 | Glycerolipid metabolism                   | KIRP | 0.244436622  |
| UCK2 | Glycerophospholipid metabolism            | KIRP | -0.064229807 |
| UCK2 | Glycine, serine and threonine metabolism  | KIRP | -0.096696912 |
| UCK2 | Glycolysis / gluconeogenesis              | KIRP | 0.041895912  |
| UCK2 | Glycosaminoglycan biosynthesis            | KIRP | 0.006199116  |
| UCK2 | Glycosaminoglycan biosynthesis            | KIRP | -0.003477958 |
| UCK2 | Glycosaminoglycan biosynthesis            | KIRP | 0.31063373   |
| UCK2 | Glycosaminoglycan degradation             | KIRP | -0.140626771 |
| UCK2 | Glycosphingolipid biosynthesis            | KIRP | 0.24143372   |
| UCK2 | Glycosphingolipid biosynthesis            | KIRP | 0.124631387  |
| UCK2 | Glycosphingolipid biosynthesis            | KIRP | 0.045821835  |
| UCK2 | Glycosylphosphatidylinositol biosynthesis | KIRP | 0.006882068  |
| UCK2 | Glyoxylate and dicarboxylate metabolism   | KIRP | -0.135274309 |
| UCK2 | Granulocyte                               | KIRP | 0.048142743  |
| UCK2 | Hedgehog signaling                        | KIRP | 0.084861786  |
| UCK2 | Histidine metabolism                      | KIRP | -0.349884091 |
| UCK2 | Hypoxia                                   | KIRP | 0.21994797   |
| UCK2 | Il-17alpha t cell                         | KIRP | 0.093437661  |
| UCK2 | Il2_stat5_signaling                       | KIRP | 0.19754091   |
| UCK2 | Il6_jak_stat3_signaling                   | KIRP | 0.212476559  |
| UCK2 | Immune_checkpoints_tumor                  | KIRP | 0.248312601  |
| UCK2 | Immune_inhibition_cytokines               | KIRP | 0.117611461  |
| UCK2 | Inositol phosphate metabolism             | KIRP | -0.140023334 |
| UCK2 | Interleukin_6_signaling                   | KIRP | 0.023509132  |
| UCK2 | Jaeger_metastasis_up                      | KIRP | 0.507455032  |
| UCK2 | Jain_nfkb_signaling                       | KIRP | 0.606010738  |
| UCK2 | Kras_signaling_up                         | KIRP | 0.034155222  |
| UCK2 | Linoleic acid metabolism                  | KIRP | 0.106264182  |
| UCK2 | Lipoic acid metabolism                    | KIRP | -0.020662361 |
| UCK2 | Lysine degradation                        | KIRP | -0.295457106 |
| UCK2 | Lysosome                                  | KIRP | -0.057972119 |
| UCK2 | M1 macrophage                             | KIRP | 0.122801778  |
| UCK2 | M2 macrophage                             | KIRP | 0.028630222  |
| UCK2 | Mannose type o-glycan biosynthesis        | KIRP | -0.189279686 |

|      |                             |      |              |
|------|-----------------------------|------|--------------|
| UCK2 | Mapk_signaling_pathway      | KIRP | 0.171852586  |
| UCK2 | Mapk3_erk1_activation       | KIRP | 0.206509352  |
| UCK2 | Marginal zone b cell        | KIRP | 0.089238136  |
| UCK2 | Memory b cell               | KIRP | 0.116709116  |
| UCK2 | Mesenchymal cell            | KIRP | 0.148624398  |
| UCK2 | Mesenchymal stem cell       | KIRP | 0.187027025  |
| UCK2 | Metabolism of xenobiotic    | KIRP | 0.276763871  |
| UCK2 | Migrating cancer stem cel   | KIRP | -0.037783953 |
| UCK2 | Mitotic_spindle             | KIRP | 0.110979735  |
| UCK2 | Monocyte                    | KIRP | 0.107062328  |
| UCK2 | Mtor_signaling_pathway      | KIRP | 0.039196109  |
| UCK2 | Mtorc1_signaling            | KIRP | 0.605230697  |
| UCK2 | Mucin type o-glycan bios    | KIRP | 0.055042512  |
| UCK2 | Myc_targets_v1              | KIRP | 0.646367031  |
| UCK2 | Myeloid cell                | KIRP | 0.062378     |
| UCK2 | N-glycan biosynthesis       | KIRP | 0.271691626  |
| UCK2 | Naive b cell                | KIRP | 0.214265336  |
| UCK2 | Naive cd4+ t cell           | KIRP | 0.172105319  |
| UCK2 | Naive cd8+ t cell           | KIRP | 0.088332477  |
| UCK2 | Natural killer cell         | KIRP | 0.10933207   |
| UCK2 | Natural killer t (nkt) cell | KIRP | 0.352728764  |
| UCK2 | Natural regulatory t (treg) | KIRP | 0.069521901  |
| UCK2 | Neomycin, kanamycin an      | KIRP | 0.212164412  |
| UCK2 | Neutrophil                  | KIRP | 0.164174203  |
| UCK2 | Nicotinate and nicotinami   | KIRP | -0.12032848  |
| UCK2 | Nitrogen metabolism         | KIRP | -0.072307191 |
| UCK2 | Nod_like_receptor_signal    | KIRP | 0.212906934  |
| UCK2 | Notch_signaling             | KIRP | 0.068160983  |
| UCK2 | One carbon pool by folate   | KIRP | 0.327030382  |
| UCK2 | Other glycan degradation    | KIRP | -0.070150716 |
| UCK2 | Other types of o-glycan b   | KIRP | -0.206630017 |
| UCK2 | Oxidative phosphorylatio    | KIRP | 0.061318414  |
| UCK2 | P53_pathway                 | KIRP | 0.199898979  |
| UCK2 | P53_signaling_pathway       | KIRP | 0.414667829  |
| UCK2 | Pantothenate and coa bios   | KIRP | 0.003656772  |
| UCK2 | Pentose and glucuronate i   | KIRP | 0.357724662  |
| UCK2 | Pentose phosphate pathwa    | KIRP | 0.40751549   |
| UCK2 | Pericyte                    | KIRP | 0.277081354  |
| UCK2 | Phenylalanine metabolism    | KIRP | 0.048310848  |
| UCK2 | Phenylalanine, tyrosine ar  | KIRP | 0.124125626  |
| UCK2 | Phosphonate and phosphir    | KIRP | 0.067546284  |
| UCK2 | Pi3k_akt_activation         | KIRP | -0.115834732 |
| UCK2 | Pi3k_akt_mtor_signaling     | KIRP | 0.313869491  |

|       |                            |      |              |
|-------|----------------------------|------|--------------|
| UCK2  | Porphyrin and chlorophyl   | KIRP | 0.290301543  |
| UCK2  | Primary bile acid biosynt  | KIRP | -0.05840212  |
| UCK2  | Propanoate metabolism      | KIRP | -0.258765708 |
| UCK2  | Purine metabolism          | KIRP | 0.575799841  |
| UCK2  | Pyrimidine metabolism      | KIRP | 0.458892849  |
| UCK2  | Pyruvate metabolism        | KIRP | -0.036488543 |
| UCK2  | Regulation_of_autophagy    | KIRP | -0.29419303  |
| UCK2  | Retinol metabolism         | KIRP | 0.222544987  |
| UCK2  | Riboflavin metabolism      | KIRP | 0.201602287  |
| UCK2  | Schmahl_pdgf_signaling     | KIRP | -0.202263457 |
| UCK2  | Selenocompound metabol     | KIRP | 0.105152972  |
| UCK2  | Signaling_by_hippo         | KIRP | -0.232494344 |
| UCK2  | Sphingolipid metabolism    | KIRP | -0.262482835 |
| UCK2  | Starch and sucrose metabo  | KIRP | -0.248779195 |
| UCK2  | Steroid biosynthesis       | KIRP | 0.268255605  |
| UCK2  | Steroid hormone biosynth   | KIRP | 0.335564937  |
| UCK2  | Sulfur metabolism          | KIRP | -0.039041829 |
| UCK2  | Synthesis and degradation  | KIRP | -0.342847553 |
| UCK2  | T helper cell              | KIRP | 0.080787188  |
| UCK2  | T helper1 (th1) cell       | KIRP | -0.030022138 |
| UCK2  | T helper17 (th17) cell     | KIRP | -0.002007494 |
| UCK2  | T helper2 (th2) cell       | KIRP | 0.097898299  |
| UCK2  | T helper9 (th9) cell       | KIRP | 0.217254276  |
| UCK2  | Taurine and hypotaurine r  | KIRP | -0.130436134 |
| UCK2  | Terpenoid backbone biosy   | KIRP | 0.080191231  |
| UCK2  | Tgf_beta_signaling_pathw   | KIRP | -0.00666294  |
| UCK2  | Thiamine metabolism        | KIRP | -0.075380548 |
| UCK2  | Tnfa_signaling_via_nfkb    | KIRP | 0.106441487  |
| UCK2  | Tryptophan metabolism      | KIRP | -0.003281971 |
| UCK2  | Tumor endothelial cell     | KIRP | 0.293168742  |
| UCK2  | Tyrosine metabolism        | KIRP | 0.013848807  |
| UCK2  | Ubiquinone and other ter   | KIRP | 0.132829339  |
| UCK2  | Valine, leucine and isoleu | KIRP | 0.037742515  |
| UCK2  | Valine, leucine and isoleu | KIRP | -0.226014772 |
| UCK2  | Vascular endothelial cell  | KIRP | 0.403349731  |
| UCK2  | Vascular smooth muscle c   | KIRP | 0.342265485  |
| UCK2  | Vegf_signaling_pathway     | KIRP | 0.137674495  |
| UCK2  | Vitamin b6 metabolism      | KIRP | 0.122415109  |
| UCK2  | Willert_wnt_signaling      | KIRP | 0.137038016  |
| UCK2  | Wnt_beta_catenin_signali   | KIRP | -0.000171962 |
| UCKL1 | Abnormal plasma cell       | KIRP | -0.279232528 |
| UCKL1 | Activated b cell           | KIRP | -0.283055427 |
| UCKL1 | Activated cd4+ t cell      | KIRP | -0.309359568 |



|       |                            |      |              |
|-------|----------------------------|------|--------------|
| UCKL1 | Activated t cell           | KIRP | -0.321832017 |
| UCKL1 | Alanine, aspartate and glu | KIRP | -0.301937818 |
| UCKL1 | Alcala_apoptosis           | KIRP | -0.308206249 |
| UCKL1 | Alpha-linolenic acid meta  | KIRP | 0.017785369  |
| UCKL1 | Amino sugar and nucleoti   | KIRP | -0.36252258  |
| UCKL1 | Ampk_pathway               | KIRP | 0.098692808  |
| UCKL1 | Angiogenesis               | KIRP | -0.339748542 |
| UCKL1 | Arachidonic acid metabol   | KIRP | -0.132508307 |
| UCKL1 | Arginine and proline metæ  | KIRP | -0.330202404 |
| UCKL1 | Arginine biosynthesis      | KIRP | -0.249148539 |
| UCKL1 | Ascorbate and aldarate mε  | KIRP | -0.318019821 |
| UCKL1 | Atypical memory b cell     | KIRP | -0.313016245 |
| UCKL1 | Axl+siglec6+ dendritic ce  | KIRP | -0.301312741 |
| UCKL1 | B cell                     | KIRP | -0.394380157 |
| UCKL1 | B1 cell                    | KIRP | -0.281760387 |
| UCKL1 | Basal cell                 | KIRP | 0.040520898  |
| UCKL1 | Beta-alanine metabolism    | KIRP | -0.271931741 |
| UCKL1 | Biosynthesis of unsaturate | KIRP | -0.252510278 |
| UCKL1 | Biotin metabolism          | KIRP | -0.018048892 |
| UCKL1 | Butanoate metabolism       | KIRP | -0.094918791 |
| UCKL1 | Caffeine metabolism        | KIRP | -0.230350284 |
| UCKL1 | Cancer stem cell           | KIRP | -0.370316049 |
| UCKL1 | Cancer stem-like cell      | KIRP | -0.102598596 |
| UCKL1 | Cd4+ cytotoxic t cell      | KIRP | -0.311503215 |
| UCKL1 | Cd4+ memory t cell         | KIRP | -0.244495295 |
| UCKL1 | Cd4+ regulatory t cell     | KIRP | -0.283802676 |
| UCKL1 | Cd4+ t helper cell         | KIRP | -0.266165983 |
| UCKL1 | Cd4+cd25+ regulatory t c   | KIRP | -0.284050619 |
| UCKL1 | Cd8+ cytotoxic t cell      | KIRP | -0.24367898  |
| UCKL1 | Cd8+ regulatory t cell     | KIRP | -0.306200373 |
| UCKL1 | Cell_cycle                 | KIRP | -0.217884028 |
| UCKL1 | Chandran_metastasis_top5   | KIRP | -0.262730386 |
| UCKL1 | Citrate cycle (tca cycle)  | KIRP | -0.143888439 |
| UCKL1 | Cysteine and methionine r  | KIRP | -0.336868465 |
| UCKL1 | Cytokine induced killer cε | KIRP | -0.238773361 |
| UCKL1 | D-arginine and d-ornithin  | KIRP | 0.032691706  |
| UCKL1 | D-glutamine and d-glutan   | KIRP | -0.151022792 |
| UCKL1 | Dendritic cell             | KIRP | -0.264220635 |
| UCKL1 | Dna_repair                 | KIRP | 0.127650839  |
| UCKL1 | Dna_replication            | KIRP | -0.041570391 |
| UCKL1 | Double-negative memory     | KIRP | -0.170445538 |
| UCKL1 | Drug metabolism - cytoch   | KIRP | -0.090193539 |
| UCKL1 | Drug metabolism - other ε  | KIRP | -0.089410721 |

|       |                              |      |              |
|-------|------------------------------|------|--------------|
| UCKL1 | E2f_targets                  | KIRP | -0.070115113 |
| UCKL1 | Ecm_receptor_interaction     | KIRP | -0.4179284   |
| UCKL1 | Effector cd4+ memory t (     | KIRP | -0.318628716 |
| UCKL1 | Effector cd8+ memory t (     | KIRP | -0.269144782 |
| UCKL1 | Effector memory t cell       | KIRP | -0.329796408 |
| UCKL1 | Effector regulatory t (treg  | KIRP | -0.317441637 |
| UCKL1 | Elvidge_hif1a_targets_up     | KIRP | -0.415992752 |
| UCKL1 | Endothelial cell             | KIRP | -0.384898714 |
| UCKL1 | Eosinophil                   | KIRP | -0.262523257 |
| UCKL1 | Ether lipid metabolism       | KIRP | -0.195023528 |
| UCKL1 | Exhausted cd4+ t cell        | KIRP | -0.480627239 |
| UCKL1 | Exhausted cd8+ t cell        | KIRP | -0.366064228 |
| UCKL1 | Exhausted t cell             | KIRP | -0.224907794 |
| UCKL1 | Fat cell (adipocyte)         | KIRP | -0.070546762 |
| UCKL1 | Fatty acid biosynthesis      | KIRP | -0.150857183 |
| UCKL1 | Fatty acid degradation       | KIRP | -0.238072077 |
| UCKL1 | Fatty acid elongation        | KIRP | -0.298406849 |
| UCKL1 | Fibroblast                   | KIRP | -0.444063827 |
| UCKL1 | Folate biosynthesis          | KIRP | -0.256567166 |
| UCKL1 | Follicular b cell            | KIRP | -0.297711181 |
| UCKL1 | Follicular dendritic cell    | KIRP | -0.279905897 |
| UCKL1 | Follicular helper (tfh) t ce | KIRP | -0.372122312 |
| UCKL1 | Follicular t cell            | KIRP | -0.092395856 |
| UCKL1 | Foxp3+il-17+ t cell          | KIRP | -0.292069298 |
| UCKL1 | Fructose and mannose me      | KIRP | -0.188125164 |
| UCKL1 | G2m_checkpoint               | KIRP | -0.172074709 |
| UCKL1 | Galactose metabolism         | KIRP | -0.281050933 |
| UCKL1 | Galie_tumor_stemness_ge      | KIRP | -0.221375468 |
| UCKL1 | Glutathione metabolism       | KIRP | -0.264035594 |
| UCKL1 | Glycerolipid metabolism      | KIRP | -0.170999866 |
| UCKL1 | Glycerophospholipid metæ     | KIRP | 0.199009315  |
| UCKL1 | Glycine, serine and threor   | KIRP | -0.153576306 |
| UCKL1 | Glycolysis / gluconeogene    | KIRP | -0.255640836 |
| UCKL1 | Glycosaminoglycan biosy      | KIRP | -0.197254325 |
| UCKL1 | Glycosaminoglycan biosy      | KIRP | -0.271509883 |
| UCKL1 | Glycosaminoglycan biosy      | KIRP | -0.327810077 |
| UCKL1 | Glycosaminoglycan degra      | KIRP | -0.189966539 |
| UCKL1 | Glycosphingolipid biosyn     | KIRP | -0.370852975 |
| UCKL1 | Glycosphingolipid biosyn     | KIRP | -0.271514461 |
| UCKL1 | Glycosphingolipid biosyn     | KIRP | -0.140330385 |
| UCKL1 | Glycosylphosphatidylinos     | KIRP | -0.02471216  |
| UCKL1 | Glyoxylate and dicarboxy     | KIRP | -0.124967344 |
| UCKL1 | Granulocyte                  | KIRP | -0.231427363 |

|       |                             |      |              |
|-------|-----------------------------|------|--------------|
| UCKL1 | Hedgehog_signaling          | KIRP | -0.37434278  |
| UCKL1 | Histidine metabolism        | KIRP | -0.107327454 |
| UCKL1 | Hypoxia                     | KIRP | -0.419388219 |
| UCKL1 | Il-17alpha t cell           | KIRP | -0.247838035 |
| UCKL1 | Il2_stat5_signaling         | KIRP | -0.451128872 |
| UCKL1 | Il6_jak_stat3_signaling     | KIRP | -0.47540809  |
| UCKL1 | Immune_checkpoints_tun      | KIRP | -0.363762038 |
| UCKL1 | Immune_inhibition_cytok     | KIRP | -0.200345339 |
| UCKL1 | Inositol phosphate metabo   | KIRP | -0.348110097 |
| UCKL1 | Interleukin_6_signaling     | KIRP | -0.530667683 |
| UCKL1 | Jaeger_metastasis_up        | KIRP | -0.438055641 |
| UCKL1 | Jain_nfkb_signaling         | KIRP | -0.218394412 |
| UCKL1 | Kras_signaling_up           | KIRP | -0.472866077 |
| UCKL1 | Linoleic acid metabolism    | KIRP | 0.172735303  |
| UCKL1 | Lipoic acid metabolism      | KIRP | 0.236195269  |
| UCKL1 | Lysine degradation          | KIRP | -0.054882086 |
| UCKL1 | Lysosome                    | KIRP | -0.309998717 |
| UCKL1 | M1 macrophage               | KIRP | -0.299955459 |
| UCKL1 | M2 macrophage               | KIRP | -0.286640505 |
| UCKL1 | Mannose type o-glycan bi    | KIRP | 0.20222678   |
| UCKL1 | Mapk_signaling_pathway      | KIRP | -0.461185072 |
| UCKL1 | Mapk3_erk1_activation       | KIRP | -0.560079212 |
| UCKL1 | Marginal zone b cell        | KIRP | -0.319134762 |
| UCKL1 | Memory b cell               | KIRP | -0.256227824 |
| UCKL1 | Mesenchymal cell            | KIRP | -0.158537064 |
| UCKL1 | Mesenchymal stem cell       | KIRP | -0.412859217 |
| UCKL1 | Metabolism of xenobiotic    | KIRP | -0.135996846 |
| UCKL1 | Migrating cancer stem cel   | KIRP | -0.234905255 |
| UCKL1 | Mitotic_spindle             | KIRP | -0.246188287 |
| UCKL1 | Monocyte                    | KIRP | -0.278727106 |
| UCKL1 | Mtor_signaling_pathway      | KIRP | -0.444419028 |
| UCKL1 | Mtorc1_signaling            | KIRP | -0.515405896 |
| UCKL1 | Mucin type o-glycan biosy   | KIRP | -0.487136801 |
| UCKL1 | Myc_targets_v1              | KIRP | -0.122752502 |
| UCKL1 | Myeloid cell                | KIRP | -0.310897041 |
| UCKL1 | N-glycan biosynthesis       | KIRP | -0.443240481 |
| UCKL1 | Naive b cell                | KIRP | -0.224289511 |
| UCKL1 | Naive cd4+ t cell           | KIRP | -0.393439046 |
| UCKL1 | Naive cd8+ t cell           | KIRP | -0.292299862 |
| UCKL1 | Natural killer cell         | KIRP | -0.303522765 |
| UCKL1 | Natural killer t (nkt) cell | KIRP | -0.215827076 |
| UCKL1 | Natural regulatory t (treg) | KIRP | -0.254107346 |
| UCKL1 | Neomycin, kanamycin and     | KIRP | -0.22746923  |

|       |                            |      |              |
|-------|----------------------------|------|--------------|
| UCKL1 | Neutrophil                 | KIRP | -0.296363058 |
| UCKL1 | Nicotinate and nicotinami  | KIRP | -0.158605075 |
| UCKL1 | Nitrogen metabolism        | KIRP | -0.364971845 |
| UCKL1 | Nod_like_receptor_signal   | KIRP | -0.417986873 |
| UCKL1 | Notch_signaling            | KIRP | -0.170598772 |
| UCKL1 | One carbon pool by folate  | KIRP | -0.273918611 |
| UCKL1 | Other glycan degradation   | KIRP | -0.161549936 |
| UCKL1 | Other types of o-glycan b  | KIRP | 0.228013076  |
| UCKL1 | Oxidative phosphorylatior  | KIRP | 0.07410922   |
| UCKL1 | P53_pathway                | KIRP | -0.307980068 |
| UCKL1 | P53_signaling_pathway      | KIRP | -0.355577858 |
| UCKL1 | Pantothenate and coa bios  | KIRP | -0.276500575 |
| UCKL1 | Pentose and glucuronate i  | KIRP | -0.297188966 |
| UCKL1 | Pentose phosphate pathwa   | KIRP | -0.368191936 |
| UCKL1 | Pericyte                   | KIRP | -0.34165942  |
| UCKL1 | Phenylalanine metabolism   | KIRP | -0.174330956 |
| UCKL1 | Phenylalanine, tyrosine ar | KIRP | -0.137946939 |
| UCKL1 | Phosphonate and phosphir   | KIRP | -0.147634594 |
| UCKL1 | Pi3k_akt_activation        | KIRP | -0.322994039 |
| UCKL1 | Pi3k_akt_mtor_signaling    | KIRP | -0.550383257 |
| UCKL1 | Porphyrin and chlorophyl   | KIRP | -0.264156917 |
| UCKL1 | Primary bile acid biosynt  | KIRP | -0.190814226 |
| UCKL1 | Propanoate metabolism      | KIRP | -0.177572837 |
| UCKL1 | Purine metabolism          | KIRP | -0.301306519 |
| UCKL1 | Pyrimidine metabolism      | KIRP | -0.00830395  |
| UCKL1 | Pyruvate metabolism        | KIRP | -0.189502553 |
| UCKL1 | Regulation_of_autophagy    | KIRP | -0.200399546 |
| UCKL1 | Retinol metabolism         | KIRP | -0.156435762 |
| UCKL1 | Riboflavin metabolism      | KIRP | -0.178187885 |
| UCKL1 | Schmahl_pdgf_signaling     | KIRP | -0.382616697 |
| UCKL1 | Selenocompound metabol     | KIRP | -0.337000167 |
| UCKL1 | Signaling_by_hippo         | KIRP | -0.217898916 |
| UCKL1 | Sphingolipid metabolism    | KIRP | -0.390189678 |
| UCKL1 | Starch and sucrose metabo  | KIRP | -0.13032162  |
| UCKL1 | Steroid biosynthesis       | KIRP | -0.028014381 |
| UCKL1 | Steroid hormone biosynth   | KIRP | -0.151193083 |
| UCKL1 | Sulfur metabolism          | KIRP | -0.281488122 |
| UCKL1 | Synthesis and degradation  | KIRP | 0.077524756  |
| UCKL1 | T helper cell              | KIRP | -0.330213373 |
| UCKL1 | T helper1 (th1) cell       | KIRP | -0.196183343 |
| UCKL1 | T helper17 (th17) cell     | KIRP | -0.196966103 |
| UCKL1 | T helper2 (th2) cell       | KIRP | -0.32045665  |
| UCKL1 | T helper9 (th9) cell       | KIRP | -0.256254415 |

|       |                            |      |              |
|-------|----------------------------|------|--------------|
| UCKL1 | Taurine and hypotaurine r  | KIRP | 0.28412835   |
| UCKL1 | Terpenoid backbone biosy   | KIRP | -0.164250674 |
| UCKL1 | Tgf_beta_signaling_pathw   | KIRP | -0.212678761 |
| UCKL1 | Thiamine metabolism        | KIRP | -0.065455436 |
| UCKL1 | Tnfa_signaling_via_nfkb    | KIRP | -0.372014683 |
| UCKL1 | Tryptophan metabolism      | KIRP | -0.251483711 |
| UCKL1 | Tumor endothelial cell     | KIRP | -0.006666956 |
| UCKL1 | Tyrosine metabolism        | KIRP | -0.130414525 |
| UCKL1 | Ubiquinone and other ter   | KIRP | -0.158395422 |
| UCKL1 | Valine, leucine and isoleu | KIRP | -0.134907385 |
| UCKL1 | Valine, leucine and isoleu | KIRP | -0.161587502 |
| UCKL1 | Vascular endothelial cell  | KIRP | -0.402804617 |
| UCKL1 | Vascular smooth muscle c   | KIRP | -0.299618369 |
| UCKL1 | Vegf_signaling_pathway     | KIRP | -0.272995374 |
| UCKL1 | Vitamin b6 metabolism      | KIRP | -0.1723925   |
| UCKL1 | Willert_wnt_signaling      | KIRP | 0.033153028  |
| UCKL1 | Wnt_beta_catenin_signali   | KIRP | 0.052509476  |
| UPP1  | Abnormal plasma cell       | KIRP | 0.159390173  |
| UPP1  | Activated b cell           | KIRP | 0.156075042  |
| UPP1  | Activated cd4+ t cell      | KIRP | 0.087772774  |
| UPP1  | Activated t cell           | KIRP | 0.150219108  |
| UPP1  | Alanine, aspartate and glu | KIRP | -0.209145895 |
| UPP1  | Alcala_apoptosis           | KIRP | 0.067223042  |
| UPP1  | Alpha-linolenic acid meta  | KIRP | 0.069538248  |
| UPP1  | Amino sugar and nucleoti   | KIRP | 0.004523843  |
| UPP1  | Ampk_pathway               | KIRP | 0.067951438  |
| UPP1  | Angiogenesis               | KIRP | 0.112319263  |
| UPP1  | Arachidonic acid metabol   | KIRP | 0.136787673  |
| UPP1  | Arginine and proline met   | KIRP | -0.044528925 |
| UPP1  | Arginine biosynthesis      | KIRP | -0.133329387 |
| UPP1  | Ascorbate and aldarate m   | KIRP | -0.274816272 |
| UPP1  | Atypical memory b cell     | KIRP | -0.131383179 |
| UPP1  | Axl+siglec6+ dendritic ce  | KIRP | 0.146511403  |
| UPP1  | B cell                     | KIRP | 0.010969736  |
| UPP1  | B1 cell                    | KIRP | 0.165084312  |
| UPP1  | Basal cell                 | KIRP | 0.330034731  |
| UPP1  | Beta-alanine metabolism    | KIRP | -0.245430888 |
| UPP1  | Biosynthesis of unsaturate | KIRP | -0.229024883 |
| UPP1  | Biotin metabolism          | KIRP | -0.128930174 |
| UPP1  | Butanoate metabolism       | KIRP | -0.232043968 |
| UPP1  | Caffeine metabolism        | KIRP | -0.195251518 |
| UPP1  | Cancer stem cell           | KIRP | 0.086984102  |
| UPP1  | Cancer stem-like cell      | KIRP | 0.14393814   |

|      |                              |      |              |
|------|------------------------------|------|--------------|
| UPP1 | Cd4+ cytotoxic t cell        | KIRP | 0.231196547  |
| UPP1 | Cd4+ memory t cell           | KIRP | 0.083027435  |
| UPP1 | Cd4+ regulatory t cell       | KIRP | 0.130549698  |
| UPP1 | Cd4+ t helper cell           | KIRP | 0.136520985  |
| UPP1 | Cd4+cd25+ regulatory t c     | KIRP | 0.136764783  |
| UPP1 | Cd8+ cytotoxic t cell        | KIRP | 0.176297385  |
| UPP1 | Cd8+ regulatory t cell       | KIRP | 0.123817733  |
| UPP1 | Cell_cycle                   | KIRP | -0.018297467 |
| UPP1 | Chandran_metastasis_top5     | KIRP | -0.260090822 |
| UPP1 | Citrate cycle (tca cycle)    | KIRP | -0.130619949 |
| UPP1 | Cysteine and methionine r    | KIRP | -0.187385296 |
| UPP1 | Cytokine induced killer ce   | KIRP | 0.216452553  |
| UPP1 | D-arginine and d-ornithin    | KIRP | -0.206352139 |
| UPP1 | D-glutamine and d-glutan     | KIRP | -0.35080907  |
| UPP1 | Dendritic cell               | KIRP | 0.107142978  |
| UPP1 | Dna_repair                   | KIRP | 0.250147825  |
| UPP1 | Dna_replication              | KIRP | 0.095581712  |
| UPP1 | Double-negative memory       | KIRP | 0.114838553  |
| UPP1 | Drug metabolism - cytoch     | KIRP | -0.073674526 |
| UPP1 | Drug metabolism - other c    | KIRP | 0.145336224  |
| UPP1 | E2f_targets                  | KIRP | 0.03321161   |
| UPP1 | Ecm_receptor_interaction     | KIRP | 0.077721104  |
| UPP1 | Effector cd4+ memory t (     | KIRP | 0.017789852  |
| UPP1 | Effector cd8+ memory t (     | KIRP | 0.162278093  |
| UPP1 | Effector memory t cell       | KIRP | 0.13074      |
| UPP1 | Effector regulatory t (treg  | KIRP | 0.075442521  |
| UPP1 | Elvidge_hif1a_targets_up     | KIRP | -0.099095404 |
| UPP1 | Endothelial cell             | KIRP | 0.118761257  |
| UPP1 | Eosinophil                   | KIRP | 0.153695137  |
| UPP1 | Ether lipid metabolism       | KIRP | -0.047683939 |
| UPP1 | Exhausted cd4+ t cell        | KIRP | 0.063896423  |
| UPP1 | Exhausted cd8+ t cell        | KIRP | 0.130216026  |
| UPP1 | Exhausted t cell             | KIRP | 0.16877981   |
| UPP1 | Fat cell (adipocyte)         | KIRP | -0.015056453 |
| UPP1 | Fatty acid biosynthesis      | KIRP | -0.087345576 |
| UPP1 | Fatty acid degradation       | KIRP | -0.219799369 |
| UPP1 | Fatty acid elongation        | KIRP | -0.126315153 |
| UPP1 | Fibroblast                   | KIRP | 0.12403494   |
| UPP1 | Folate biosynthesis          | KIRP | -0.018535439 |
| UPP1 | Follicular b cell            | KIRP | 0.103125883  |
| UPP1 | Follicular dendritic cell    | KIRP | 0.072726529  |
| UPP1 | Follicular helper (tfh) t ce | KIRP | -0.007411439 |
| UPP1 | Follicular t cell            | KIRP | 0.178413123  |

|      |                            |      |              |
|------|----------------------------|------|--------------|
| UPP1 | Foxp3+il-17+ t cell        | KIRP | 0.013170354  |
| UPP1 | Fructose and mannose me    | KIRP | 0.100596045  |
| UPP1 | G2m_checkpoint             | KIRP | -0.002425183 |
| UPP1 | Galactose metabolism       | KIRP | 0.109414969  |
| UPP1 | Galie_tumor_stemness_ge    | KIRP | 0.036980119  |
| UPP1 | Glutathione metabolism     | KIRP | 0.1443021    |
| UPP1 | Glycerolipid metabolism    | KIRP | -0.110793037 |
| UPP1 | Glycerophospholipid metæ   | KIRP | 0.140058178  |
| UPP1 | Glycine, serine and threor | KIRP | -0.138877354 |
| UPP1 | Glycolysis / gluconeogene  | KIRP | -0.130830028 |
| UPP1 | Glycosaminoglycan biosy1   | KIRP | 0.378836529  |
| UPP1 | Glycosaminoglycan biosy1   | KIRP | 0.18700639   |
| UPP1 | Glycosaminoglycan biosy1   | KIRP | 0.407293871  |
| UPP1 | Glycosaminoglycan degra    | KIRP | 0.082112585  |
| UPP1 | Glycosphingolipid biosyn1  | KIRP | 0.202838762  |
| UPP1 | Glycosphingolipid biosyn1  | KIRP | 0.213217451  |
| UPP1 | Glycosphingolipid biosyn1  | KIRP | 0.26526613   |
| UPP1 | Glycosylphosphatidylinos   | KIRP | -0.153872124 |
| UPP1 | Glyoxylate and dicarboxy   | KIRP | -0.164147011 |
| UPP1 | Granulocyte                | KIRP | 0.085233093  |
| UPP1 | Hedgehog_signaling         | KIRP | -0.109125815 |
| UPP1 | Histidine metabolism       | KIRP | -0.240111759 |
| UPP1 | Hypoxia                    | KIRP | 0.215339444  |
| UPP1 | Il-17ralpha t cell         | KIRP | 0.127110132  |
| UPP1 | Il2_stat5_signaling        | KIRP | 0.215714774  |
| UPP1 | Il6_jak_stat3_signaling    | KIRP | 0.107586583  |
| UPP1 | Immune_checkpoints_tun     | KIRP | 0.096712055  |
| UPP1 | Immune_inhibition_cytok    | KIRP | 0.243453817  |
| UPP1 | Inositol phosphate metabo  | KIRP | -0.265594774 |
| UPP1 | Interleukin_6_signaling    | KIRP | -0.225787578 |
| UPP1 | Jaeger_metastasis_up       | KIRP | -0.069450497 |
| UPP1 | Jain_nfkb_signaling        | KIRP | -0.118852861 |
| UPP1 | Kras_signaling_up          | KIRP | 0.132189181  |
| UPP1 | Linoleic acid metabolism   | KIRP | 0.072742463  |
| UPP1 | Lipoic acid metabolism     | KIRP | 0.029559397  |
| UPP1 | Lysine degradation         | KIRP | -0.398623766 |
| UPP1 | Lysosome                   | KIRP | 0.029321788  |
| UPP1 | M1 macrophage              | KIRP | 0.117545589  |
| UPP1 | M2 macrophage              | KIRP | 0.092015854  |
| UPP1 | Mannose type o-glycan bi   | KIRP | 0.169823823  |
| UPP1 | Mapk_signaling_pathway     | KIRP | 0.122112464  |
| UPP1 | Mapk3_erk1_activation      | KIRP | -0.233052203 |
| UPP1 | Marginal zone b cell       | KIRP | 0.109770575  |

|      |                             |      |              |
|------|-----------------------------|------|--------------|
| UPP1 | Memory b cell               | KIRP | 0.07925263   |
| UPP1 | Mesenchymal cell            | KIRP | 0.273571195  |
| UPP1 | Mesenchymal stem cell       | KIRP | 0.076881398  |
| UPP1 | Metabolism of xenobiotic    | KIRP | 0.029027641  |
| UPP1 | Migrating cancer stem cel   | KIRP | 0.225119115  |
| UPP1 | Mitotic_spindle             | KIRP | -0.270261346 |
| UPP1 | Monocyte                    | KIRP | 0.237320327  |
| UPP1 | Mtor_signaling_pathway      | KIRP | -0.103742404 |
| UPP1 | Mtorc1_signaling            | KIRP | 0.035662679  |
| UPP1 | Mucin type o-glycan biosy   | KIRP | -0.256330222 |
| UPP1 | Myc_targets_v1              | KIRP | 0.147093073  |
| UPP1 | Myeloid cell                | KIRP | 0.06061418   |
| UPP1 | N-glycan biosynthesis       | KIRP | -0.075867346 |
| UPP1 | Naive b cell                | KIRP | 0.106720301  |
| UPP1 | Naive cd4+ t cell           | KIRP | 0.051870012  |
| UPP1 | Naive cd8+ t cell           | KIRP | 0.077505486  |
| UPP1 | Natural killer cell         | KIRP | 0.163836246  |
| UPP1 | Natural killer t (nkt) cell | KIRP | 0.130644176  |
| UPP1 | Natural regulatory t (treg) | KIRP | 0.099983814  |
| UPP1 | Neomycin, kanamycin and     | KIRP | 0.17805954   |
| UPP1 | Neutrophil                  | KIRP | 0.249660942  |
| UPP1 | Nicotinate and nicotinami   | KIRP | -0.119122971 |
| UPP1 | Nitrogen metabolism         | KIRP | -0.162709375 |
| UPP1 | Nod_like_receptor_signal    | KIRP | 0.03377483   |
| UPP1 | Notch_signaling             | KIRP | 0.136196044  |
| UPP1 | One carbon pool by folate   | KIRP | -0.196897574 |
| UPP1 | Other glycan degradation    | KIRP | -0.141077883 |
| UPP1 | Other types of o-glycan b   | KIRP | 0.323571882  |
| UPP1 | Oxidative phosphorylatio    | KIRP | 0.176978769  |
| UPP1 | P53_pathway                 | KIRP | 0.353130831  |
| UPP1 | P53_signaling_pathway       | KIRP | 0.041773825  |
| UPP1 | Pantothenate and coa bios   | KIRP | -0.150050072 |
| UPP1 | Pentose and glucuronate i   | KIRP | -0.195769646 |
| UPP1 | Pentose phosphate pathwa    | KIRP | 0.012784817  |
| UPP1 | Pericyte                    | KIRP | 0.170234938  |
| UPP1 | Phenylalanine metabolism    | KIRP | -0.101487812 |
| UPP1 | Phenylalanine, tyrosine ar  | KIRP | -0.04859958  |
| UPP1 | Phosphonate and phosphir    | KIRP | -0.263546648 |
| UPP1 | Pi3k_akt_activation         | KIRP | -0.055041643 |
| UPP1 | Pi3k_akt_mtor_signaling     | KIRP | 0.01681972   |
| UPP1 | Porphyrin and chlorophyl    | KIRP | -0.058157296 |
| UPP1 | Primary bile acid biosynt   | KIRP | -0.138625418 |
| UPP1 | Propanoate metabolism       | KIRP | -0.301499461 |



|      |                            |      |              |
|------|----------------------------|------|--------------|
| UPP1 | Purine metabolism          | KIRP | 0.15014772   |
| UPP1 | Pyrimidine metabolism      | KIRP | 0.164637454  |
| UPP1 | Pyruvate metabolism        | KIRP | -0.154821952 |
| UPP1 | Regulation_of_autophagy    | KIRP | -0.173303588 |
| UPP1 | Retinol metabolism         | KIRP | -0.119924298 |
| UPP1 | Riboflavin metabolism      | KIRP | 0.039030106  |
| UPP1 | Schmahl_pdgf_signaling     | KIRP | -0.107495305 |
| UPP1 | Selenocompound metabol     | KIRP | -0.309656797 |
| UPP1 | Signaling_by_hippo         | KIRP | -0.416842555 |
| UPP1 | Sphingolipid metabolism    | KIRP | -0.333832484 |
| UPP1 | Starch and sucrose metabo  | KIRP | -0.027879697 |
| UPP1 | Steroid biosynthesis       | KIRP | 0.081029632  |
| UPP1 | Steroid hormone biosynth   | KIRP | -0.140544237 |
| UPP1 | Sulfur metabolism          | KIRP | -0.13277321  |
| UPP1 | Synthesis and degradation  | KIRP | -0.187260804 |
| UPP1 | T helper cell              | KIRP | 0.053815695  |
| UPP1 | T helper1 (th1) cell       | KIRP | 0.097707272  |
| UPP1 | T helper17 (th17) cell     | KIRP | 0.127626222  |
| UPP1 | T helper2 (th2) cell       | KIRP | 0.034187784  |
| UPP1 | T helper9 (th9) cell       | KIRP | 0.235890794  |
| UPP1 | Taurine and hypotaurine r  | KIRP | 0.148903953  |
| UPP1 | Terpenoid backbone biosy   | KIRP | -0.160611431 |
| UPP1 | Tgf_beta_signaling_pathw   | KIRP | -0.140339089 |
| UPP1 | Thiamine metabolism        | KIRP | -0.012113973 |
| UPP1 | Tnfa_signaling_via_nfkb    | KIRP | 0.210331698  |
| UPP1 | Tryptophan metabolism      | KIRP | -0.185162773 |
| UPP1 | Tumor endothelial cell     | KIRP | 0.090741447  |
| UPP1 | Tyrosine metabolism        | KIRP | -0.022858059 |
| UPP1 | Ubiquinone and other ter   | KIRP | -0.121744734 |
| UPP1 | Valine, leucine and isoleu | KIRP | 0.124888751  |
| UPP1 | Valine, leucine and isoleu | KIRP | -0.238887445 |
| UPP1 | Vascular endothelial cell  | KIRP | 0.230878804  |
| UPP1 | Vascular smooth muscle c   | KIRP | 0.138310591  |
| UPP1 | Vegf_signaling_pathway     | KIRP | 0.132631389  |
| UPP1 | Vitamin b6 metabolism      | KIRP | -0.099323904 |
| UPP1 | Willert_wnt_signaling      | KIRP | 0.070479637  |
| UPP1 | Wnt_beta_catenin_signali   | KIRP | 0.185523562  |
| UPP2 | Abnormal plasma cell       | KIRP | -0.119859097 |
| UPP2 | Activated b cell           | KIRP | 0.062994033  |
| UPP2 | Activated cd4+ t cell      | KIRP | 0.006275534  |
| UPP2 | Activated t cell           | KIRP | -0.004653021 |
| UPP2 | Alanine, aspartate and glu | KIRP | 0.225434919  |
| UPP2 | Alcala_apoptosis           | KIRP | 0.110109936  |

|      |                            |      |              |
|------|----------------------------|------|--------------|
| UPP2 | Alpha-linolenic acid meta  | KIRP | 0.113527791  |
| UPP2 | Amino sugar and nucleoti   | KIRP | 0.012866627  |
| UPP2 | Ampk_pathway               | KIRP | -0.083560684 |
| UPP2 | Angiogenesis               | KIRP | -0.036726914 |
| UPP2 | Arachidonic acid metabol   | KIRP | 0.169768437  |
| UPP2 | Arginine and proline metε  | KIRP | 0.164072476  |
| UPP2 | Arginine biosynthesis      | KIRP | 0.168605555  |
| UPP2 | Ascorbate and aldarate mε  | KIRP | 0.177769442  |
| UPP2 | Atypical memory b cell     | KIRP | 0.154721683  |
| UPP2 | Axl+siglec6+ dendritic ce  | KIRP | -0.104893189 |
| UPP2 | B cell                     | KIRP | 0.155431817  |
| UPP2 | B1 cell                    | KIRP | 0.054450827  |
| UPP2 | Basal cell                 | KIRP | -0.255260865 |
| UPP2 | Beta-alanine metabolism    | KIRP | 0.298337799  |
| UPP2 | Biosynthesis of unsaturate | KIRP | 0.177246405  |
| UPP2 | Biotin metabolism          | KIRP | 0.015397184  |
| UPP2 | Butanoate metabolism       | KIRP | 0.363453994  |
| UPP2 | Caffeine metabolism        | KIRP | 0.168590475  |
| UPP2 | Cancer stem cell           | KIRP | -0.066703073 |
| UPP2 | Cancer stem-like cell      | KIRP | 0.2841589    |
| UPP2 | Cd4+ cytotoxic t cell      | KIRP | 0.032390233  |
| UPP2 | Cd4+ memory t cell         | KIRP | 0.008558219  |
| UPP2 | Cd4+ regulatory t cell     | KIRP | 0.044811597  |
| UPP2 | Cd4+ t helper cell         | KIRP | 0.082555028  |
| UPP2 | Cd4+cd25+ regulatory t c   | KIRP | 0.068934882  |
| UPP2 | Cd8+ cytotoxic t cell      | KIRP | 0.071478179  |
| UPP2 | Cd8+ regulatory t cell     | KIRP | 0.028433717  |
| UPP2 | Cell_cycle                 | KIRP | -0.3136076   |
| UPP2 | Chandran_metastasis_top5   | KIRP | -0.219995478 |
| UPP2 | Citrate cycle (tca cycle)  | KIRP | 0.267550913  |
| UPP2 | Cysteine and methionine r  | KIRP | 0.158502347  |
| UPP2 | Cytokine induced killer cε | KIRP | -0.026935273 |
| UPP2 | D-arginine and d-ornithin  | KIRP | 0.374746168  |
| UPP2 | D-glutamine and d-glutan   | KIRP | 0.230910845  |
| UPP2 | Dendritic cell             | KIRP | 0.092480754  |
| UPP2 | Dna_repair                 | KIRP | 0.018462363  |
| UPP2 | Dna_replication            | KIRP | -0.124654321 |
| UPP2 | Double-negative memory     | KIRP | -0.027777075 |
| UPP2 | Drug metabolism - cytoch   | KIRP | 0.288743485  |
| UPP2 | Drug metabolism - other ε  | KIRP | 0.203813726  |
| UPP2 | E2f_targets                | KIRP | -0.263063691 |
| UPP2 | Ecm_receptor_interaction   | KIRP | -0.240538257 |
| UPP2 | Effector cd4+ memory t (   | KIRP | 0.020859011  |

|      |                              |      |              |
|------|------------------------------|------|--------------|
| UPP2 | Effector cd8+ memory t (     | KIRP | 0.082963997  |
| UPP2 | Effector memory t cell       | KIRP | 0.062949677  |
| UPP2 | Effector regulatory t (treg  | KIRP | 0.011958664  |
| UPP2 | Elvidge_hif1a_targets_up     | KIRP | -0.180303785 |
| UPP2 | Endothelial cell             | KIRP | -0.224145788 |
| UPP2 | Eosinophil                   | KIRP | 0.110408462  |
| UPP2 | Ether lipid metabolism       | KIRP | 0.252206798  |
| UPP2 | Exhausted cd4+ t cell        | KIRP | -0.018876408 |
| UPP2 | Exhausted cd8+ t cell        | KIRP | -0.00889148  |
| UPP2 | Exhausted t cell             | KIRP | 0.10303663   |
| UPP2 | Fat cell (adipocyte)         | KIRP | 0.226229464  |
| UPP2 | Fatty acid biosynthesis      | KIRP | 0.110062015  |
| UPP2 | Fatty acid degradation       | KIRP | 0.275529708  |
| UPP2 | Fatty acid elongation        | KIRP | 0.188975872  |
| UPP2 | Fibroblast                   | KIRP | -0.146780841 |
| UPP2 | Folate biosynthesis          | KIRP | 0.127716146  |
| UPP2 | Follicular b cell            | KIRP | -0.03742648  |
| UPP2 | Follicular dendritic cell    | KIRP | 0.078098744  |
| UPP2 | Follicular helper (tfh) t ce | KIRP | 0.163882873  |
| UPP2 | Follicular t cell            | KIRP | -0.062006352 |
| UPP2 | Foxp3+il-17+ t cell          | KIRP | -0.204373831 |
| UPP2 | Fructose and mannose me      | KIRP | 0.081531972  |
| UPP2 | G2m_checkpoint               | KIRP | -0.352646178 |
| UPP2 | Galactose metabolism         | KIRP | 0.104750117  |
| UPP2 | Galie_tumor_stemness_ge      | KIRP | -0.217825351 |
| UPP2 | Glutathione metabolism       | KIRP | 0.070113831  |
| UPP2 | Glycerolipid metabolism      | KIRP | 0.185790856  |
| UPP2 | Glycerophospholipid metæ     | KIRP | 0.25360469   |
| UPP2 | Glycine, serine and threor   | KIRP | 0.415773565  |
| UPP2 | Glycolysis / gluconeogene    | KIRP | 0.186566281  |
| UPP2 | Glycosaminoglycan biosy      | KIRP | -0.10100803  |
| UPP2 | Glycosaminoglycan biosy      | KIRP | -0.204663785 |
| UPP2 | Glycosaminoglycan biosy      | KIRP | -0.262086391 |
| UPP2 | Glycosaminoglycan degra      | KIRP | 0.156738282  |
| UPP2 | Glycosphingolipid biosyn     | KIRP | -0.172957096 |
| UPP2 | Glycosphingolipid biosyn     | KIRP | -0.093115425 |
| UPP2 | Glycosphingolipid biosyn     | KIRP | 0.053929852  |
| UPP2 | Glycosylphosphatidylinos     | KIRP | -0.100649817 |
| UPP2 | Glyoxylate and dicarboxy     | KIRP | 0.34412457   |
| UPP2 | Granulocyte                  | KIRP | 0.181360897  |
| UPP2 | Hedgehog_signaling           | KIRP | -0.20382523  |
| UPP2 | Histidine metabolism         | KIRP | 0.428991856  |
| UPP2 | Hypoxia                      | KIRP | -0.147760302 |

|      |                             |      |              |
|------|-----------------------------|------|--------------|
| UPP2 | Il-17alpha t cell           | KIRP | 0.06693912   |
| UPP2 | Il2_stat5_signaling         | KIRP | -0.034383708 |
| UPP2 | Il6_jak_stat3_signaling     | KIRP | 0.018628993  |
| UPP2 | Immune_checkpoints_tur      | KIRP | -0.039067883 |
| UPP2 | Immune_inhibition_cytok     | KIRP | 0.091010571  |
| UPP2 | Inositol phosphate metabo   | KIRP | -0.146845375 |
| UPP2 | Interleukin_6_signaling     | KIRP | -0.074365239 |
| UPP2 | Jaeger_metastasis_up        | KIRP | -0.097554357 |
| UPP2 | Jain_nfkb_signaling         | KIRP | -0.167523054 |
| UPP2 | Kras_signaling_up           | KIRP | -0.017817525 |
| UPP2 | Linoleic acid metabolism    | KIRP | 0.123743235  |
| UPP2 | Lipoic acid metabolism      | KIRP | 0.101478291  |
| UPP2 | Lysine degradation          | KIRP | 0.247072058  |
| UPP2 | Lysosome                    | KIRP | 0.205898546  |
| UPP2 | M1 macrophage               | KIRP | 0.026744041  |
| UPP2 | M2 macrophage               | KIRP | 0.1887529    |
| UPP2 | Mannose type o-glycan bi    | KIRP | -0.002007017 |
| UPP2 | Mapk_signaling_pathway      | KIRP | -0.244174614 |
| UPP2 | Mapk3_erk1_activation       | KIRP | -0.153880257 |
| UPP2 | Marginal zone b cell        | KIRP | -0.004564684 |
| UPP2 | Memory b cell               | KIRP | 0.001828662  |
| UPP2 | Mesenchymal cell            | KIRP | -0.10040894  |
| UPP2 | Mesenchymal stem cell       | KIRP | -0.037400147 |
| UPP2 | Metabolism of xenobiotic    | KIRP | 0.197285333  |
| UPP2 | Migrating cancer stem cel   | KIRP | -0.097328787 |
| UPP2 | Mitotic_spindle             | KIRP | -0.252566252 |
| UPP2 | Monocyte                    | KIRP | 0.091331545  |
| UPP2 | Mtor_signaling_pathway      | KIRP | -0.099568475 |
| UPP2 | Mtorc1_signaling            | KIRP | -0.139873369 |
| UPP2 | Mucin type o-glycan biosy   | KIRP | -0.070787287 |
| UPP2 | Myc_targets_v1              | KIRP | -0.145651042 |
| UPP2 | Myeloid cell                | KIRP | 0.123829848  |
| UPP2 | N-glycan biosynthesis       | KIRP | -0.254447621 |
| UPP2 | Naive b cell                | KIRP | -0.043524675 |
| UPP2 | Naive cd4+ t cell           | KIRP | -0.065594113 |
| UPP2 | Naive cd8+ t cell           | KIRP | -0.105958172 |
| UPP2 | Natural killer cell         | KIRP | 0.080372478  |
| UPP2 | Natural killer t (nkt) cell | KIRP | -0.070188293 |
| UPP2 | Natural regulatory t (treg) | KIRP | 0.057781851  |
| UPP2 | Neomycin, kanamycin an      | KIRP | -0.12525888  |
| UPP2 | Neutrophil                  | KIRP | 0.075299415  |
| UPP2 | Nicotinate and nicotinami   | KIRP | 0.378537999  |
| UPP2 | Nitrogen metabolism         | KIRP | 0.054739119  |

|      |                            |      |              |
|------|----------------------------|------|--------------|
| UPP2 | Nod_like_receptor_signal   | KIRP | -0.104970171 |
| UPP2 | Notch_signaling            | KIRP | -0.302957135 |
| UPP2 | One carbon pool by folate  | KIRP | 0.102810196  |
| UPP2 | Other glycan degradation   | KIRP | 0.168223398  |
| UPP2 | Other types of o-glycan b  | KIRP | -0.024415739 |
| UPP2 | Oxidative phosphorylatio   | KIRP | 0.230460429  |
| UPP2 | P53_pathway                | KIRP | 0.049549026  |
| UPP2 | P53_signaling_pathway      | KIRP | -0.207022755 |
| UPP2 | Pantothenate and coa bios  | KIRP | 0.242535223  |
| UPP2 | Pentose and glucuronate i  | KIRP | 0.17378482   |
| UPP2 | Pentose phosphate pathwa   | KIRP | -0.013553896 |
| UPP2 | Pericyte                   | KIRP | -0.080598382 |
| UPP2 | Phenylalanine metabolism   | KIRP | 0.351695994  |
| UPP2 | Phenylalanine, tyrosine ar | KIRP | 0.17439168   |
| UPP2 | Phosphonate and phosphir   | KIRP | 0.09633721   |
| UPP2 | Pi3k_akt_activation        | KIRP | -0.167187775 |
| UPP2 | Pi3k_akt_mtor_signaling    | KIRP | 0.028648133  |
| UPP2 | Porphyrin and chlorophyl   | KIRP | 0.222333386  |
| UPP2 | Primary bile acid biosynt  | KIRP | 0.293714264  |
| UPP2 | Propanoate metabolism      | KIRP | 0.266714749  |
| UPP2 | Purine metabolism          | KIRP | -0.074489496 |
| UPP2 | Pyrimidine metabolism      | KIRP | 0.009840096  |
| UPP2 | Pyruvate metabolism        | KIRP | 0.271722189  |
| UPP2 | Regulation_of_autophagy    | KIRP | 0.168260283  |
| UPP2 | Retinol metabolism         | KIRP | 0.23912049   |
| UPP2 | Riboflavin metabolism      | KIRP | 0.221676906  |
| UPP2 | Schmahl_pdgf_signaling     | KIRP | 0.000875275  |
| UPP2 | Selenocompound metabol     | KIRP | 0.215155905  |
| UPP2 | Signaling_by_hippo         | KIRP | -0.043680345 |
| UPP2 | Sphingolipid metabolism    | KIRP | 0.137323833  |
| UPP2 | Starch and sucrose metabo  | KIRP | 0.219370155  |
| UPP2 | Steroid biosynthesis       | KIRP | 0.044177438  |
| UPP2 | Steroid hormone biosynth   | KIRP | 0.168483142  |
| UPP2 | Sulfur metabolism          | KIRP | 0.208245429  |
| UPP2 | Synthesis and degradation  | KIRP | 0.320620533  |
| UPP2 | T helper cell              | KIRP | 0.13251447   |
| UPP2 | T helper1 (th1) cell       | KIRP | 0.265476966  |
| UPP2 | T helper17 (th17) cell     | KIRP | 0.065114994  |
| UPP2 | T helper2 (th2) cell       | KIRP | 0.126206202  |
| UPP2 | T helper9 (th9) cell       | KIRP | -0.068834341 |
| UPP2 | Taurine and hypotaurine r  | KIRP | 0.011630153  |
| UPP2 | Terpenoid backbone biosy   | KIRP | 0.041979978  |
| UPP2 | Tgf_beta_signaling_pathw   | KIRP | -0.28856078  |

|      |                            |      |              |
|------|----------------------------|------|--------------|
| UPP2 | Thiamine metabolism        | KIRP | 0.345986314  |
| UPP2 | Tnfa_signaling_via_nfkB    | KIRP | -0.02821982  |
| UPP2 | Tryptophan metabolism      | KIRP | 0.300311028  |
| UPP2 | Tumor endothelial cell     | KIRP | -0.232009053 |
| UPP2 | Tyrosine metabolism        | KIRP | 0.253679762  |
| UPP2 | Ubiquinone and other ter   | KIRP | 0.156116623  |
| UPP2 | Valine, leucine and isoleu | KIRP | 0.289564871  |
| UPP2 | Valine, leucine and isoleu | KIRP | 0.309095912  |
| UPP2 | Vascular endothelial cell  | KIRP | -0.218964391 |
| UPP2 | Vascular smooth muscle c   | KIRP | -0.232653949 |
| UPP2 | Vegf_signaling_pathway     | KIRP | -0.061976961 |
| UPP2 | Vitamin b6 metabolism      | KIRP | 0.237582074  |
| UPP2 | Willert_wnt_signaling      | KIRP | -0.198209515 |
| UPP2 | Wnt_beta_catenin_signali   | KIRP | -0.300740215 |
| CDA  | Abnormal plasma cell       | LGG  | -0.168453838 |
| CDA  | Activated b cell           | LGG  | 0.291999146  |
| CDA  | Activated cd4+ t cell      | LGG  | 0.064607219  |
| CDA  | Activated t cell           | LGG  | 0.157545298  |
| CDA  | Alanine, aspartate and glu | LGG  | -0.127583076 |
| CDA  | Alcala_apoptosis           | LGG  | 0.226748752  |
| CDA  | Alpha-linolenic acid meta  | LGG  | 0.050704627  |
| CDA  | Amino sugar and nucleoti   | LGG  | 0.113415184  |
| CDA  | Ampk_pathway               | LGG  | -0.063043531 |
| CDA  | Angiogenesis               | LGG  | 0.305232016  |
| CDA  | Arachidonic acid metabol   | LGG  | 0.223438419  |
| CDA  | Arginine and proline met   | LGG  | 0.124474497  |
| CDA  | Arginine biosynthesis      | LGG  | 0.090073379  |
| CDA  | Ascorbate and aldarate m   | LGG  | -0.075344494 |
| CDA  | Atypical memory b cell     | LGG  | 0.201784582  |
| CDA  | Axl+siglec6+ dendritic ce  | LGG  | 0.187790358  |
| CDA  | B cell                     | LGG  | 0.14535876   |
| CDA  | B1 cell                    | LGG  | 0.092978455  |
| CDA  | Basal cell                 | LGG  | 0.350033051  |
| CDA  | Beta-alanine metabolism    | LGG  | 0.066097909  |
| CDA  | Biosynthesis of unsaturate | LGG  | 0.012944863  |
| CDA  | Biotin metabolism          | LGG  | -0.089515587 |
| CDA  | Butanoate metabolism       | LGG  | -0.037831838 |
| CDA  | Caffeine metabolism        | LGG  | 0.043844324  |
| CDA  | Cancer stem cell           | LGG  | 0.204816079  |
| CDA  | Cancer stem-like cell      | LGG  | 0.338595463  |
| CDA  | Cd4+ cytotoxic t cell      | LGG  | 0.176113153  |
| CDA  | Cd4+ memory t cell         | LGG  | 0.135111268  |
| CDA  | Cd4+ regulatory t cell     | LGG  | 0.152476785  |

|     |                              |     |              |
|-----|------------------------------|-----|--------------|
| CDA | Cd4+ t helper cell           | LGG | 0.10247538   |
| CDA | Cd4+cd25+ regulatory t c     | LGG | 0.116523219  |
| CDA | Cd8+ cytotoxic t cell        | LGG | 0.175663509  |
| CDA | Cd8+ regulatory t cell       | LGG | 0.110644608  |
| CDA | Cell_cycle                   | LGG | -0.067980516 |
| CDA | Chandran_metastasis_top5     | LGG | -0.197641162 |
| CDA | Citrate cycle (tca cycle)    | LGG | 0.104092511  |
| CDA | Cysteine and methionine r    | LGG | 0.074130344  |
| CDA | Cytokine induced killer c    | LGG | 0.181728809  |
| CDA | D-arginine and d-ornithin    | LGG | 0.062290662  |
| CDA | D-glutamine and d-glutan     | LGG | -0.218896231 |
| CDA | Dendritic cell               | LGG | 0.133094328  |
| CDA | Dna_repair                   | LGG | 0.159055768  |
| CDA | Dna_replication              | LGG | -0.02463665  |
| CDA | Double-negative memory       | LGG | 0.163319779  |
| CDA | Drug metabolism - cytoch     | LGG | 0.129916252  |
| CDA | Drug metabolism - other c    | LGG | 0.205299097  |
| CDA | E2f_targets                  | LGG | -0.056095555 |
| CDA | Ecm_receptor_interaction     | LGG | 0.19941855   |
| CDA | Effector cd4+ memory t (     | LGG | 0.006525496  |
| CDA | Effector cd8+ memory t (     | LGG | 0.129659202  |
| CDA | Effector memory t cell       | LGG | 0.056621707  |
| CDA | Effector regulatory t (treg  | LGG | 0.141684467  |
| CDA | Elvidge_hif1a_targets_up     | LGG | 0.004537842  |
| CDA | Endothelial cell             | LGG | 0.307793697  |
| CDA | Eosinophil                   | LGG | 0.120955688  |
| CDA | Ether lipid metabolism       | LGG | -0.069691395 |
| CDA | Exhausted cd4+ t cell        | LGG | 0.056820654  |
| CDA | Exhausted cd8+ t cell        | LGG | 0.17030368   |
| CDA | Exhausted t cell             | LGG | 0.140404921  |
| CDA | Fat cell (adipocyte)         | LGG | 0.189929338  |
| CDA | Fatty acid biosynthesis      | LGG | 0.22285347   |
| CDA | Fatty acid degradation       | LGG | 0.135315815  |
| CDA | Fatty acid elongation        | LGG | 0.096489853  |
| CDA | Fibroblast                   | LGG | 0.282014512  |
| CDA | Folate biosynthesis          | LGG | 0.050095545  |
| CDA | Follicular b cell            | LGG | 0.10981937   |
| CDA | Follicular dendritic cell    | LGG | 0.103352441  |
| CDA | Follicular helper (tfh) t ce | LGG | 0.107375582  |
| CDA | Follicular t cell            | LGG | 0.145653616  |
| CDA | Foxp3+il-17+ t cell          | LGG | -0.061124207 |
| CDA | Fructose and mannose me      | LGG | 0.174952286  |
| CDA | G2m_checkpoint               | LGG | -0.095262496 |

|     |                            |     |              |
|-----|----------------------------|-----|--------------|
| CDA | Galactose metabolism       | LGG | 0.254522586  |
| CDA | Galie_tumor_stemness_ge    | LGG | 0.051304873  |
| CDA | Glutathione metabolism     | LGG | 0.26396717   |
| CDA | Glycerolipid metabolism    | LGG | 0.002897773  |
| CDA | Glycerophospholipid metæ   | LGG | -0.004934038 |
| CDA | Glycine, serine and threor | LGG | 0.104029755  |
| CDA | Glycolysis / gluconeogene  | LGG | 0.157282366  |
| CDA | Glycosaminoglycan biosy    | LGG | 0.269493095  |
| CDA | Glycosaminoglycan biosy    | LGG | -0.145719321 |
| CDA | Glycosaminoglycan biosy    | LGG | 0.088633511  |
| CDA | Glycosaminoglycan degra    | LGG | 0.171262233  |
| CDA | Glycosphingolipid biosyn   | LGG | 0.105713718  |
| CDA | Glycosphingolipid biosyn   | LGG | 0.181543725  |
| CDA | Glycosphingolipid biosyn   | LGG | 0.024769045  |
| CDA | Glycosylphosphatidylinos   | LGG | 0.039852772  |
| CDA | Glyoxylate and dicarboxy   | LGG | 0.103169306  |
| CDA | Granulocyte                | LGG | 0.133092869  |
| CDA | Hedgehog_signaling         | LGG | 0.011482172  |
| CDA | Histidine metabolism       | LGG | 0.00028493   |
| CDA | Hypoxia                    | LGG | 0.320044073  |
| CDA | Il-17ralpha t cell         | LGG | 0.170072608  |
| CDA | Il2_stat5_signaling        | LGG | 0.262403058  |
| CDA | Il6_jak_stat3_signaling    | LGG | 0.17002286   |
| CDA | Immune_checkpoints_tur     | LGG | 0.040779218  |
| CDA | Immune_inhibition_cytok    | LGG | 0.143703012  |
| CDA | Inositol phosphate metabo  | LGG | -0.155111407 |
| CDA | Interleukin_6_signaling    | LGG | -0.003545566 |
| CDA | Jaeger_metastasis_up       | LGG | 0.060274893  |
| CDA | Jain_nfkb_signaling        | LGG | 0.071089654  |
| CDA | Kras_signaling_up          | LGG | 0.153757415  |
| CDA | Linoleic acid metabolism   | LGG | -0.036941634 |
| CDA | Lipoic acid metabolism     | LGG | 0.090485995  |
| CDA | Lysine degradation         | LGG | -0.083390527 |
| CDA | Lysosome                   | LGG | 0.201813909  |
| CDA | M1 macrophage              | LGG | 0.142852292  |
| CDA | M2 macrophage              | LGG | 0.164562301  |
| CDA | Mannose type o-glycan bi   | LGG | -0.070005726 |
| CDA | Mapk_signaling_pathway     | LGG | 0.041346169  |
| CDA | Mapk3_erk1_activation      | LGG | -0.060791858 |
| CDA | Marginal zone b cell       | LGG | 0.060535321  |
| CDA | Memory b cell              | LGG | 0.011526994  |
| CDA | Mesenchymal cell           | LGG | 0.286990605  |
| CDA | Mesenchymal stem cell      | LGG | 0.282581644  |



|     |                             |     |              |
|-----|-----------------------------|-----|--------------|
| CDA | Metabolism of xenobiotic    | LGG | 0.149620914  |
| CDA | Migrating cancer stem cel   | LGG | 0.077613052  |
| CDA | Mitotic_spindle             | LGG | -0.193767733 |
| CDA | Monocyte                    | LGG | 0.202762895  |
| CDA | Mtor_signaling_pathway      | LGG | -0.078508903 |
| CDA | Mtorc1_signaling            | LGG | 0.113602855  |
| CDA | Mucin type o-glycan bios    | LGG | -0.106278828 |
| CDA | Myc_targets_v1              | LGG | 0.064293361  |
| CDA | Myeloid cell                | LGG | 0.163101309  |
| CDA | N-glycan biosynthesis       | LGG | 0.04193159   |
| CDA | Naive b cell                | LGG | -0.159277016 |
| CDA | Naive cd4+ t cell           | LGG | 0.151377099  |
| CDA | Naive cd8+ t cell           | LGG | 0.115693784  |
| CDA | Natural killer cell         | LGG | 0.158206518  |
| CDA | Natural killer t (nkt) cell | LGG | 0.23724259   |
| CDA | Natural regulatory t (treg) | LGG | 0.167354636  |
| CDA | Neomycin, kanamycin an      | LGG | 0.061053452  |
| CDA | Neutrophil                  | LGG | 0.234783651  |
| CDA | Nicotinate and nicotinami   | LGG | 0.095451689  |
| CDA | Nitrogen metabolism         | LGG | 0.053098409  |
| CDA | Nod_like_receptor_signal    | LGG | 0.024530673  |
| CDA | Notch_signaling             | LGG | 0.03419581   |
| CDA | One carbon pool by folate   | LGG | 0.004252546  |
| CDA | Other glycan degradation    | LGG | 0.175052712  |
| CDA | Other types of o-glycan b   | LGG | 0.062862422  |
| CDA | Oxidative phosphorylatio    | LGG | 0.252304527  |
| CDA | P53_pathway                 | LGG | 0.372158535  |
| CDA | P53_signaling_pathway       | LGG | 0.147052444  |
| CDA | Pantothenate and coa bios   | LGG | 0.055363239  |
| CDA | Pentose and glucuronate i   | LGG | -0.012512624 |
| CDA | Pentose phosphate pathwa    | LGG | 0.120975845  |
| CDA | Pericyte                    | LGG | 0.471689696  |
| CDA | Phenylalanine metabolism    | LGG | 0.100192734  |
| CDA | Phenylalanine, tyrosine ar  | LGG | -0.045900675 |
| CDA | Phosphonate and phosphir    | LGG | -0.126491261 |
| CDA | Pi3k_akt_activation         | LGG | -0.036907438 |
| CDA | Pi3k_akt_mtor_signaling     | LGG | 0.057902994  |
| CDA | Porphyrin and chlorophyl    | LGG | 0.111635234  |
| CDA | Primary bile acid biosynt   | LGG | 0.028401844  |
| CDA | Propanoate metabolism       | LGG | 0.049151428  |
| CDA | Purine metabolism           | LGG | 0.072688189  |
| CDA | Pyrimidine metabolism       | LGG | 0.086594695  |
| CDA | Pyruvate metabolism         | LGG | 0.064936283  |

|      |                            |     |              |
|------|----------------------------|-----|--------------|
| CDA  | Regulation_of_autophagy    | LGG | -0.102666881 |
| CDA  | Retinol metabolism         | LGG | 0.008089238  |
| CDA  | Riboflavin metabolism      | LGG | 0.118355027  |
| CDA  | Schmahl_pdgf_signaling     | LGG | 0.037565068  |
| CDA  | Selenocompound metabol     | LGG | 0.069263679  |
| CDA  | Signaling_by_hippo         | LGG | -0.195012612 |
| CDA  | Sphingolipid metabolism    | LGG | -0.030589965 |
| CDA  | Starch and sucrose metabo  | LGG | 0.139174093  |
| CDA  | Steroid biosynthesis       | LGG | 0.085479031  |
| CDA  | Steroid hormone biosynth   | LGG | 0.043572723  |
| CDA  | Sulfur metabolism          | LGG | 0.168011509  |
| CDA  | Synthesis and degradation  | LGG | -0.011815016 |
| CDA  | T helper cell              | LGG | 0.232950292  |
| CDA  | T helper1 (th1) cell       | LGG | 0.15261037   |
| CDA  | T helper17 (th17) cell     | LGG | 0.08694344   |
| CDA  | T helper2 (th2) cell       | LGG | 0.155267506  |
| CDA  | T helper9 (th9) cell       | LGG | 0.170632498  |
| CDA  | Taurine and hypotaurine r  | LGG | 0.060618809  |
| CDA  | Terpenoid backbone biosy   | LGG | -0.006653767 |
| CDA  | Tgf_beta_signaling_pathw   | LGG | -0.102340683 |
| CDA  | Thiamine metabolism        | LGG | 0.044395361  |
| CDA  | Tnfa_signaling_via_nfkb    | LGG | 0.161582041  |
| CDA  | Tryptophan metabolism      | LGG | 0.134378301  |
| CDA  | Tumor endothelial cell     | LGG | 0.095470585  |
| CDA  | Tyrosine metabolism        | LGG | 0.148074153  |
| CDA  | Ubiquinone and other terp  | LGG | 0.210504692  |
| CDA  | Valine, leucine and isoleu | LGG | 0.251868527  |
| CDA  | Valine, leucine and isoleu | LGG | 0.032107531  |
| CDA  | Vascular endothelial cell  | LGG | 0.405761285  |
| CDA  | Vascular smooth muscle c   | LGG | 0.277290094  |
| CDA  | Vegf_signaling_pathway     | LGG | 0.052505736  |
| CDA  | Vitamin b6 metabolism      | LGG | -0.036847541 |
| CDA  | Willert_wnt_signaling      | LGG | 0.047073352  |
| CDA  | Wnt_beta_catenin_signali   | LGG | -0.019130912 |
| UCK1 | Abnormal plasma cell       | LGG | 0.020949849  |
| UCK1 | Activated b cell           | LGG | -0.170414847 |
| UCK1 | Activated cd4+ t cell      | LGG | -0.148154145 |
| UCK1 | Activated t cell           | LGG | -0.217924977 |
| UCK1 | Alanine, aspartate and glu | LGG | -0.074186628 |
| UCK1 | Alcala_apoptosis           | LGG | 0.227386551  |
| UCK1 | Alpha-linolenic acid meta  | LGG | 0.130030037  |
| UCK1 | Amino sugar and nucleoti   | LGG | -0.115772403 |
| UCK1 | Ampk_pathway               | LGG | 0.089673158  |

|      |                                         |     |              |
|------|-----------------------------------------|-----|--------------|
| UCK1 | Angiogenesis                            | LGG | -0.338779391 |
| UCK1 | Arachidonic acid metabolism             | LGG | 0.150913243  |
| UCK1 | Arginine and proline metabolism         | LGG | -0.005239305 |
| UCK1 | Arginine biosynthesis                   | LGG | -0.119583899 |
| UCK1 | Ascorbate and aldarate metabolism       | LGG | 0.234654017  |
| UCK1 | Atypical memory b cell                  | LGG | -0.119032167 |
| UCK1 | Axl+siglec6+ dendritic cell             | LGG | -0.21441044  |
| UCK1 | B cell                                  | LGG | -0.111820371 |
| UCK1 | B1 cell                                 | LGG | -0.29957839  |
| UCK1 | Basal cell                              | LGG | -0.054706034 |
| UCK1 | Beta-alanine metabolism                 | LGG | 0.0942759    |
| UCK1 | Biosynthesis of unsaturated fatty acids | LGG | 0.103425954  |
| UCK1 | Biotin metabolism                       | LGG | -0.007932775 |
| UCK1 | Butanoate metabolism                    | LGG | 0.187761811  |
| UCK1 | Caffeine metabolism                     | LGG | 0.102336986  |
| UCK1 | Cancer stem cell                        | LGG | -0.219200598 |
| UCK1 | Cancer stem-like cell                   | LGG | -0.133368513 |
| UCK1 | Cd4+ cytotoxic t cell                   | LGG | -0.15837851  |
| UCK1 | Cd4+ memory t cell                      | LGG | -0.289968611 |
| UCK1 | Cd4+ regulatory t cell                  | LGG | -0.046524133 |
| UCK1 | Cd4+ t helper cell                      | LGG | -0.13161294  |
| UCK1 | Cd4+cd25+ regulatory t cell             | LGG | -0.150181373 |
| UCK1 | Cd8+ cytotoxic t cell                   | LGG | -0.221254575 |
| UCK1 | Cd8+ regulatory t cell                  | LGG | -0.346688145 |
| UCK1 | Cell_cycle                              | LGG | 0.001891978  |
| UCK1 | Chandran_metastasis_top5                | LGG | -0.133020812 |
| UCK1 | Citrate cycle (tca cycle)               | LGG | 0.017245373  |
| UCK1 | Cysteine and methionine metabolism      | LGG | 0.130690565  |
| UCK1 | Cytokine induced killer cell            | LGG | -0.153175722 |
| UCK1 | D-arginine and d-ornithine              | LGG | 0.182487959  |
| UCK1 | D-glutamine and d-glutamate             | LGG | 0.006203022  |
| UCK1 | Dendritic cell                          | LGG | -0.150707746 |
| UCK1 | Dna_repair                              | LGG | 0.46546583   |
| UCK1 | Dna_replication                         | LGG | 0.185518271  |
| UCK1 | Double-negative memory t cell           | LGG | -0.083047032 |
| UCK1 | Drug metabolism - cytochrome p450       | LGG | 0.147003596  |
| UCK1 | Drug metabolism - other                 | LGG | 0.426027609  |
| UCK1 | E2f_targets                             | LGG | 0.047521405  |
| UCK1 | Ecm_receptor_interaction                | LGG | -0.417768419 |
| UCK1 | Effector cd4+ memory t cell             | LGG | -0.226669713 |
| UCK1 | Effector cd8+ memory t cell             | LGG | -0.26068851  |
| UCK1 | Effector memory t cell                  | LGG | -0.002732719 |
| UCK1 | Effector regulatory t cell (treg)       | LGG | -0.154581179 |

|      |                                |     |              |
|------|--------------------------------|-----|--------------|
| UCK1 | Elvidge_hif1a_targets_up       | LGG | -0.34577477  |
| UCK1 | Endothelial cell               | LGG | -0.204655576 |
| UCK1 | Eosinophil                     | LGG | -0.049909766 |
| UCK1 | Ether lipid metabolism         | LGG | -0.060567017 |
| UCK1 | Exhausted cd4+ t cell          | LGG | -0.220684447 |
| UCK1 | Exhausted cd8+ t cell          | LGG | -0.179899101 |
| UCK1 | Exhausted t cell               | LGG | -0.125679782 |
| UCK1 | Fat cell (adipocyte)           | LGG | 0.012456395  |
| UCK1 | Fatty acid biosynthesis        | LGG | -0.076931046 |
| UCK1 | Fatty acid degradation         | LGG | 0.253333328  |
| UCK1 | Fatty acid elongation          | LGG | 0.037874525  |
| UCK1 | Fibroblast                     | LGG | -0.254651606 |
| UCK1 | Folate biosynthesis            | LGG | 0.224806656  |
| UCK1 | Follicular b cell              | LGG | -0.108940481 |
| UCK1 | Follicular dendritic cell      | LGG | -0.163799953 |
| UCK1 | Follicular helper (tfh) t cell | LGG | -0.189787254 |
| UCK1 | Follicular t cell              | LGG | -0.10515113  |
| UCK1 | Foxp3+il-17+ t cell            | LGG | -0.045130335 |
| UCK1 | Fructose and mannose me        | LGG | 0.165744095  |
| UCK1 | G2m_checkpoint                 | LGG | -0.038228539 |
| UCK1 | Galactose metabolism           | LGG | -0.036160158 |
| UCK1 | Galie_tumor_stemness_ge        | LGG | -0.002470648 |
| UCK1 | Glutathione metabolism         | LGG | 0.161865317  |
| UCK1 | Glycerolipid metabolism        | LGG | 0.044412204  |
| UCK1 | Glycerophospholipid metæ       | LGG | -0.114044114 |
| UCK1 | Glycine, serine and threor     | LGG | 0.374916028  |
| UCK1 | Glycolysis / gluconeogene      | LGG | 0.023330356  |
| UCK1 | Glycosaminoglycan biosy        | LGG | -0.07043335  |
| UCK1 | Glycosaminoglycan biosy        | LGG | -0.286228609 |
| UCK1 | Glycosaminoglycan biosy        | LGG | -0.158035553 |
| UCK1 | Glycosaminoglycan degra        | LGG | -0.202184837 |
| UCK1 | Glycosphingolipid biosyn       | LGG | -0.325239054 |
| UCK1 | Glycosphingolipid biosyn       | LGG | -0.288426753 |
| UCK1 | Glycosphingolipid biosyn       | LGG | 0.056976678  |
| UCK1 | Glycosylphosphatidylinos       | LGG | 0.094125212  |
| UCK1 | Glyoxylate and dicarboxy       | LGG | 0.294079177  |
| UCK1 | Granulocyte                    | LGG | -0.084178716 |
| UCK1 | Hedgehog_signaling             | LGG | -0.261991758 |
| UCK1 | Histidine metabolism           | LGG | 0.075122088  |
| UCK1 | Hypoxia                        | LGG | -0.241272102 |
| UCK1 | Il-17ralpha t cell             | LGG | -0.291146482 |
| UCK1 | Il2_stat5_signaling            | LGG | -0.257285038 |
| UCK1 | Il6_jak_stat3_signaling        | LGG | -0.284429238 |

|      |                             |     |              |
|------|-----------------------------|-----|--------------|
| UCK1 | Immune_checkpoints_tur      | LGG | -0.322384798 |
| UCK1 | Immune_inhibition_cytok     | LGG | 0.012691275  |
| UCK1 | Inositol phosphate metabo   | LGG | -0.338765656 |
| UCK1 | Interleukin_6_signaling     | LGG | -0.382151267 |
| UCK1 | Jaeger_metastasis_up        | LGG | -0.155464069 |
| UCK1 | Jain_nfkb_signaling         | LGG | 0.080339526  |
| UCK1 | Kras_signaling_up           | LGG | -0.35049926  |
| UCK1 | Linoleic acid metabolism    | LGG | 0.027355826  |
| UCK1 | Lipoic acid metabolism      | LGG | 0.337612833  |
| UCK1 | Lysine degradation          | LGG | 0.198958414  |
| UCK1 | Lysosome                    | LGG | -0.161307083 |
| UCK1 | M1 macrophage               | LGG | -0.084821764 |
| UCK1 | M2 macrophage               | LGG | -0.104810495 |
| UCK1 | Mannose type o-glycan bi    | LGG | 0.137951851  |
| UCK1 | Mapk_signaling_pathway      | LGG | -0.426272241 |
| UCK1 | Mapk3_erk1_activation       | LGG | -0.396800086 |
| UCK1 | Marginal zone b cell        | LGG | 0.003383795  |
| UCK1 | Memory b cell               | LGG | -0.124333067 |
| UCK1 | Mesenchymal cell            | LGG | -0.096577548 |
| UCK1 | Mesenchymal stem cell       | LGG | -0.198161974 |
| UCK1 | Metabolism of xenobiotic    | LGG | 0.215412138  |
| UCK1 | Migrating cancer stem cel   | LGG | -0.132218641 |
| UCK1 | Mitotic_spindle             | LGG | -0.228552164 |
| UCK1 | Monocyte                    | LGG | -0.126310356 |
| UCK1 | Mtor_signaling_pathway      | LGG | -0.108228289 |
| UCK1 | Mtorc1_signaling            | LGG | -0.137329587 |
| UCK1 | Mucin type o-glycan biosy   | LGG | -0.497073908 |
| UCK1 | Myc_targets_v1              | LGG | 0.308049509  |
| UCK1 | Myeloid cell                | LGG | -0.126878152 |
| UCK1 | N-glycan biosynthesis       | LGG | -0.156805845 |
| UCK1 | Naive b cell                | LGG | 0.234033226  |
| UCK1 | Naive cd4+ t cell           | LGG | -0.080628943 |
| UCK1 | Naive cd8+ t cell           | LGG | -0.092531515 |
| UCK1 | Natural killer cell         | LGG | -0.149882514 |
| UCK1 | Natural killer t (nkt) cell | LGG | 0.108261548  |
| UCK1 | Natural regulatory t (treg) | LGG | -0.189665181 |
| UCK1 | Neomycin, kanamycin and     | LGG | -0.23096775  |
| UCK1 | Neutrophil                  | LGG | -0.117946098 |
| UCK1 | Nicotinate and nicotinami   | LGG | -0.063848921 |
| UCK1 | Nitrogen metabolism         | LGG | -0.030813682 |
| UCK1 | Nod_like_receptor_signal    | LGG | -0.213402227 |
| UCK1 | Notch_signaling             | LGG | 0.148331144  |
| UCK1 | One carbon pool by folate   | LGG | 0.244935624  |

|      |                            |     |              |
|------|----------------------------|-----|--------------|
| UCK1 | Other glycan degradation   | LGG | -0.052968112 |
| UCK1 | Other types of o-glycan b  | LGG | 0.300354387  |
| UCK1 | Oxidative phosphorylatior  | LGG | 0.292926125  |
| UCK1 | P53_pathway                | LGG | -0.037901161 |
| UCK1 | P53_signaling_pathway      | LGG | -0.117741214 |
| UCK1 | Pantothenate and coa bios  | LGG | -0.282998579 |
| UCK1 | Pentose and glucuronate i  | LGG | 0.136891435  |
| UCK1 | Pentose phosphate pathwa   | LGG | 0.284891151  |
| UCK1 | Pericyte                   | LGG | -0.211163201 |
| UCK1 | Phenylalanine metabolism   | LGG | -0.188556383 |
| UCK1 | Phenylalanine, tyrosine ar | LGG | -0.07080854  |
| UCK1 | Phosphonate and phosphir   | LGG | -0.129757492 |
| UCK1 | Pi3k_akt_activation        | LGG | -0.196140538 |
| UCK1 | Pi3k_akt_mtor_signaling    | LGG | -0.380295279 |
| UCK1 | Porphyrin and chlorophyl   | LGG | 0.268247307  |
| UCK1 | Primary bile acid biosynt  | LGG | -0.004081775 |
| UCK1 | Propanoate metabolism      | LGG | 0.070000912  |
| UCK1 | Purine metabolism          | LGG | 0.216611571  |
| UCK1 | Pyrimidine metabolism      | LGG | 0.38456404   |
| UCK1 | Pyruvate metabolism        | LGG | 0.117220543  |
| UCK1 | Regulation_of_autophagy    | LGG | -0.032320053 |
| UCK1 | Retinol metabolism         | LGG | 0.111779999  |
| UCK1 | Riboflavin metabolism      | LGG | 0.126778711  |
| UCK1 | Schmahl_pdgf_signaling     | LGG | -0.06639845  |
| UCK1 | Selenocompound metabol     | LGG | 0.066259584  |
| UCK1 | Signaling_by_hippo         | LGG | -0.09921075  |
| UCK1 | Sphingolipid metabolism    | LGG | -0.269092441 |
| UCK1 | Starch and sucrose metabo  | LGG | -0.143785845 |
| UCK1 | Steroid biosynthesis       | LGG | 0.085712392  |
| UCK1 | Steroid hormone biosynth   | LGG | 0.120833271  |
| UCK1 | Sulfur metabolism          | LGG | 0.34445311   |
| UCK1 | Synthesis and degradation  | LGG | 0.144632622  |
| UCK1 | T helper cell              | LGG | -0.221003084 |
| UCK1 | T helper1 (th1) cell       | LGG | -0.200335731 |
| UCK1 | T helper17 (th17) cell     | LGG | -0.256335594 |
| UCK1 | T helper2 (th2) cell       | LGG | -0.129581567 |
| UCK1 | T helper9 (th9) cell       | LGG | -0.182778734 |
| UCK1 | Taurine and hypotaurine r  | LGG | 0.051132072  |
| UCK1 | Terpenoid backbone biosy   | LGG | 0.188804765  |
| UCK1 | Tgf_beta_signaling_pathw   | LGG | -0.118879216 |
| UCK1 | Thiamine metabolism        | LGG | 0.156437162  |
| UCK1 | Tnfa_signaling_via_nfkb    | LGG | -0.277464756 |
| UCK1 | Tryptophan metabolism      | LGG | 0.053646372  |

|      |                            |     |              |
|------|----------------------------|-----|--------------|
| UCK1 | Tumor endothelial cell     | LGG | 0.052948505  |
| UCK1 | Tyrosine metabolism        | LGG | -0.071471987 |
| UCK1 | Ubiquinone and other ter   | LGG | 0.147252508  |
| UCK1 | Valine, leucine and isoleu | LGG | 0.141288072  |
| UCK1 | Valine, leucine and isoleu | LGG | 0.262018559  |
| UCK1 | Vascular endothelial cell  | LGG | -0.173654247 |
| UCK1 | Vascular smooth muscle c   | LGG | -0.223710236 |
| UCK1 | Vegf_signaling_pathway     | LGG | -0.153189399 |
| UCK1 | Vitamin b6 metabolism      | LGG | -0.00475429  |
| UCK1 | Willert_wnt_signaling      | LGG | 0.238676984  |
| UCK1 | Wnt_beta_catenin_signali   | LGG | 0.111362095  |
| UCK2 | Abnormal plasma cell       | LGG | 0.138970893  |
| UCK2 | Activated b cell           | LGG | -0.19358943  |
| UCK2 | Activated cd4+ t cell      | LGG | -0.185043391 |
| UCK2 | Activated t cell           | LGG | 0.178990549  |
| UCK2 | Alanine, aspartate and glu | LGG | -0.29401354  |
| UCK2 | Alcala_apoptosis           | LGG | 0.057597114  |
| UCK2 | Alpha-linolenic acid meta  | LGG | -0.543525789 |
| UCK2 | Amino sugar and nucleoti   | LGG | -0.140808083 |
| UCK2 | Ampk_pathway               | LGG | 0.318810928  |
| UCK2 | Angiogenesis               | LGG | 0.053948585  |
| UCK2 | Arachidonic acid metabol   | LGG | -0.52684426  |
| UCK2 | Arginine and proline metæ  | LGG | -0.409044322 |
| UCK2 | Arginine biosynthesis      | LGG | -0.214935427 |
| UCK2 | Ascorbate and aldarate mε  | LGG | -0.203922958 |
| UCK2 | Atypical memory b cell     | LGG | 0.152544113  |
| UCK2 | Axl+siglec6+ dendritic ce  | LGG | -0.383468873 |
| UCK2 | B cell                     | LGG | -0.209644415 |
| UCK2 | B1 cell                    | LGG | -0.078259368 |
| UCK2 | Basal cell                 | LGG | -0.184941833 |
| UCK2 | Beta-alanine metabolism    | LGG | -0.479275099 |
| UCK2 | Biosynthesis of unsaturate | LGG | -0.227503345 |
| UCK2 | Biotin metabolism          | LGG | 0.175836826  |
| UCK2 | Butanoate metabolism       | LGG | -0.352274388 |
| UCK2 | Caffeine metabolism        | LGG | -0.020827695 |
| UCK2 | Cancer stem cell           | LGG | 0.057609101  |
| UCK2 | Cancer stem-like cell      | LGG | -0.092163221 |
| UCK2 | Cd4+ cytotoxic t cell      | LGG | -0.2639699   |
| UCK2 | Cd4+ memory t cell         | LGG | 0.152300524  |
| UCK2 | Cd4+ regulatory t cell     | LGG | -0.117433345 |
| UCK2 | Cd4+ t helper cell         | LGG | -0.189591961 |
| UCK2 | Cd4+cd25+ regulatory t c   | LGG | -0.160822518 |
| UCK2 | Cd8+ cytotoxic t cell      | LGG | -0.027996589 |

|      |                              |     |              |
|------|------------------------------|-----|--------------|
| UCK2 | Cd8+ regulatory t cell       | LGG | -0.033164663 |
| UCK2 | Cell_cycle                   | LGG | 0.532297314  |
| UCK2 | Chandran_metastasis_top5     | LGG | 0.420320842  |
| UCK2 | Citrate cycle (tca cycle)    | LGG | -0.067167963 |
| UCK2 | Cysteine and methionine r    | LGG | -0.433087276 |
| UCK2 | Cytokine induced killer cε   | LGG | 0.048028354  |
| UCK2 | D-arginine and d-ornithin    | LGG | -0.188246031 |
| UCK2 | D-glutamine and d-glutan     | LGG | -0.127271334 |
| UCK2 | Dendritic cell               | LGG | -0.202375927 |
| UCK2 | Dna_repair                   | LGG | 0.33681688   |
| UCK2 | Dna_replication              | LGG | 0.413678929  |
| UCK2 | Double-negative memory       | LGG | 0.166499327  |
| UCK2 | Drug metabolism - cytoch     | LGG | -0.487111872 |
| UCK2 | Drug metabolism - other c    | LGG | -0.061042112 |
| UCK2 | E2f_targets                  | LGG | 0.502995417  |
| UCK2 | Ecm_receptor_interaction     | LGG | 0.008307678  |
| UCK2 | Effector cd4+ memory t (     | LGG | -0.178093108 |
| UCK2 | Effector cd8+ memory t (     | LGG | -0.299240984 |
| UCK2 | Effector memory t cell       | LGG | -0.259185259 |
| UCK2 | Effector regulatory t (treg  | LGG | -0.022219847 |
| UCK2 | Elvidge_hif1a_targets_up     | LGG | 0.212591909  |
| UCK2 | Endothelial cell             | LGG | 0.058718045  |
| UCK2 | Eosinophil                   | LGG | -0.235557493 |
| UCK2 | Ether lipid metabolism       | LGG | -0.469316449 |
| UCK2 | Exhausted cd4+ t cell        | LGG | -0.164965627 |
| UCK2 | Exhausted cd8+ t cell        | LGG | -0.160088117 |
| UCK2 | Exhausted t cell             | LGG | -0.165717281 |
| UCK2 | Fat cell (adipocyte)         | LGG | -0.281876317 |
| UCK2 | Fatty acid biosynthesis      | LGG | -0.165570588 |
| UCK2 | Fatty acid degradation       | LGG | -0.46538456  |
| UCK2 | Fatty acid elongation        | LGG | -0.312574403 |
| UCK2 | Fibroblast                   | LGG | 0.047824366  |
| UCK2 | Folate biosynthesis          | LGG | -0.182437245 |
| UCK2 | Follicular b cell            | LGG | -0.211201112 |
| UCK2 | Follicular dendritic cell    | LGG | 0.112372457  |
| UCK2 | Follicular helper (tfh) t ce | LGG | -0.161378513 |
| UCK2 | Follicular t cell            | LGG | 0.008914333  |
| UCK2 | Foxp3+il-17+ t cell          | LGG | 0.200025516  |
| UCK2 | Fructose and mannose me      | LGG | -0.279098885 |
| UCK2 | G2m_checkpoint               | LGG | 0.553307642  |
| UCK2 | Galactose metabolism         | LGG | -0.098772477 |
| UCK2 | Galie_tumor_stemness_ge      | LGG | 0.155017547  |
| UCK2 | Glutathione metabolism       | LGG | -0.301954479 |



|      |                                           |     |              |
|------|-------------------------------------------|-----|--------------|
| UCK2 | Glycerolipid metabolism                   | LGG | -0.287515267 |
| UCK2 | Glycerophospholipid metabolism            | LGG | -0.433896436 |
| UCK2 | Glycine, serine and threonine metabolism  | LGG | -0.346410204 |
| UCK2 | Glycolysis / gluconeogenesis              | LGG | -0.296514657 |
| UCK2 | Glycosaminoglycan biosynthesis            | LGG | 0.13582071   |
| UCK2 | Glycosaminoglycan biosynthesis            | LGG | -0.05793195  |
| UCK2 | Glycosaminoglycan biosynthesis            | LGG | -0.264934033 |
| UCK2 | Glycosaminoglycan degradation             | LGG | -0.147358061 |
| UCK2 | Glycosphingolipid biosynthesis            | LGG | -0.088882322 |
| UCK2 | Glycosphingolipid biosynthesis            | LGG | -0.177552996 |
| UCK2 | Glycosphingolipid biosynthesis            | LGG | -0.247932742 |
| UCK2 | Glycosylphosphatidylinositol biosynthesis | LGG | -0.095880376 |
| UCK2 | Glyoxylate and dicarboxylate metabolism   | LGG | 0.023810056  |
| UCK2 | Granulocyte                               | LGG | -0.201803885 |
| UCK2 | Hedgehog signaling                        | LGG | 0.24066887   |
| UCK2 | Histidine metabolism                      | LGG | -0.472031819 |
| UCK2 | Hypoxia                                   | LGG | -0.161257785 |
| UCK2 | IL-17Ralpha T cell                        | LGG | 0.010290124  |
| UCK2 | IL2_stat5_signaling                       | LGG | -0.157932444 |
| UCK2 | IL6_jak_stat3_signaling                   | LGG | -0.120084612 |
| UCK2 | Immune checkpoints                        | LGG | -0.177099354 |
| UCK2 | Immune inhibition                         | LGG | -0.249271872 |
| UCK2 | Inositol phosphate metabolism             | LGG | -0.249454699 |
| UCK2 | Interleukin_6_signaling                   | LGG | -0.052548526 |
| UCK2 | Jaeger metastasis up                      | LGG | 0.133978868  |
| UCK2 | Jain_nfkb_signaling                       | LGG | 0.500933766  |
| UCK2 | Kras_signaling_up                         | LGG | -0.191154569 |
| UCK2 | Linoleic acid metabolism                  | LGG | -0.496708081 |
| UCK2 | Lipoic acid metabolism                    | LGG | -0.005111118 |
| UCK2 | Lysine degradation                        | LGG | 0.09541302   |
| UCK2 | Lysosome                                  | LGG | -0.244634793 |
| UCK2 | M1 macrophage                             | LGG | -0.27512354  |
| UCK2 | M2 macrophage                             | LGG | -0.184238646 |
| UCK2 | Mannose type o-glycan biosynthesis        | LGG | -0.064618716 |
| UCK2 | Mapk_signaling_pathway                    | LGG | -0.198107482 |
| UCK2 | Mapk3_erk1_activation                     | LGG | -0.109000657 |
| UCK2 | Marginal zone B cell                      | LGG | -0.171163336 |
| UCK2 | Memory B cell                             | LGG | -0.059760033 |
| UCK2 | Mesenchymal cell                          | LGG | 0.057979608  |
| UCK2 | Mesenchymal stem cell                     | LGG | -0.129892331 |
| UCK2 | Metabolism of xenobiotics                 | LGG | -0.44645932  |
| UCK2 | Migrating cancer stem cell                | LGG | -0.390505083 |
| UCK2 | Mitotic spindle                           | LGG | 0.377993056  |

|      |                                                   |     |              |
|------|---------------------------------------------------|-----|--------------|
| UCK2 | Monocyte                                          | LGG | -0.268019168 |
| UCK2 | Mtor_signaling_pathway                            | LGG | 0.119445115  |
| UCK2 | Mtorc1_signaling                                  | LGG | 0.07905279   |
| UCK2 | Mucin type o-glycan biosynthesis                  | LGG | -0.101711013 |
| UCK2 | Myc_targets_v1                                    | LGG | 0.52665915   |
| UCK2 | Myeloid cell                                      | LGG | -0.215300627 |
| UCK2 | N-glycan biosynthesis                             | LGG | 0.283902146  |
| UCK2 | Naive b cell                                      | LGG | 0.070064394  |
| UCK2 | Naive cd4+ t cell                                 | LGG | -0.115080677 |
| UCK2 | Naive cd8+ t cell                                 | LGG | -0.000131776 |
| UCK2 | Natural killer cell                               | LGG | -0.117196019 |
| UCK2 | Natural killer t (nkt) cell                       | LGG | 0.10423659   |
| UCK2 | Natural regulatory t (treg) cell                  | LGG | -0.147130947 |
| UCK2 | Neomycin, kanamycin and streptomycin resistance   | LGG | -0.304847246 |
| UCK2 | Neutrophil                                        | LGG | -0.178120808 |
| UCK2 | Nicotinate and nicotinamide metabolism            | LGG | -0.297352736 |
| UCK2 | Nitrogen metabolism                               | LGG | -0.409137763 |
| UCK2 | Nod_like_receptor_signaling                       | LGG | -0.228175485 |
| UCK2 | Notch_signaling                                   | LGG | -0.155373017 |
| UCK2 | One carbon pool by folate                         | LGG | 0.386203341  |
| UCK2 | Other glycan degradation                          | LGG | -0.04861007  |
| UCK2 | Other types of o-glycan biosynthesis              | LGG | -0.060116332 |
| UCK2 | Oxidative phosphorylation                         | LGG | -0.122346894 |
| UCK2 | P53_pathway                                       | LGG | -0.087636192 |
| UCK2 | P53_signaling_pathway                             | LGG | 0.474895577  |
| UCK2 | Pantothenate and coenzyme a biosynthesis          | LGG | -0.187373246 |
| UCK2 | Pentose and glucuronate interconversions          | LGG | -0.222086842 |
| UCK2 | Pentose phosphate pathway                         | LGG | -0.247686824 |
| UCK2 | Pericyte                                          | LGG | 0.171217102  |
| UCK2 | Phenylalanine metabolism                          | LGG | -0.378976818 |
| UCK2 | Phenylalanine, tyrosine and tryptophan metabolism | LGG | -0.272823544 |
| UCK2 | Phosphonate and phosphonate metabolism            | LGG | -0.311619657 |
| UCK2 | Pi3k_akt_activation                               | LGG | 0.262693015  |
| UCK2 | Pi3k_akt_mtor_signaling                           | LGG | 0.019436877  |
| UCK2 | Porphyrin and chlorophyll metabolism              | LGG | -0.153625172 |
| UCK2 | Primary bile acid biosynthesis                    | LGG | -0.575559875 |
| UCK2 | Propanoate metabolism                             | LGG | -0.240711757 |
| UCK2 | Purine metabolism                                 | LGG | 0.440029793  |
| UCK2 | Pyrimidine metabolism                             | LGG | 0.479073514  |
| UCK2 | Pyruvate metabolism                               | LGG | -0.227533304 |
| UCK2 | Regulation_of_autophagy                           | LGG | -0.440133045 |
| UCK2 | Retinol metabolism                                | LGG | -0.506301552 |
| UCK2 | Riboflavin metabolism                             | LGG | -0.102841797 |

|       |                            |     |              |
|-------|----------------------------|-----|--------------|
| UCK2  | Schmahl_pdgf_signaling     | LGG | -0.264175733 |
| UCK2  | Selenocompound metabol     | LGG | 0.156116762  |
| UCK2  | Signaling_by_hippo         | LGG | -0.231202814 |
| UCK2  | Sphingolipid metabolism    | LGG | -0.006649257 |
| UCK2  | Starch and sucrose metabo  | LGG | -0.446450316 |
| UCK2  | Steroid biosynthesis       | LGG | 0.246503738  |
| UCK2  | Steroid hormone biosynth   | LGG | -0.19101515  |
| UCK2  | Sulfur metabolism          | LGG | -0.045246104 |
| UCK2  | Synthesis and degradation  | LGG | -0.377108479 |
| UCK2  | T helper cell              | LGG | -0.146114633 |
| UCK2  | T helper1 (th1) cell       | LGG | -0.240348545 |
| UCK2  | T helper17 (th17) cell     | LGG | -0.179657138 |
| UCK2  | T helper2 (th2) cell       | LGG | -0.321106864 |
| UCK2  | T helper9 (th9) cell       | LGG | -0.200173843 |
| UCK2  | Taurine and hypotaurine r  | LGG | 0.024488275  |
| UCK2  | Terpenoid backbone biosy   | LGG | 0.204620443  |
| UCK2  | Tgf_beta_signaling_pathw   | LGG | 0.133120105  |
| UCK2  | Thiamine metabolism        | LGG | -0.345928776 |
| UCK2  | Tnfa_signaling_via_nfkb    | LGG | -0.081865282 |
| UCK2  | Tryptophan metabolism      | LGG | -0.427494786 |
| UCK2  | Tumor endothelial cell     | LGG | 0.026552573  |
| UCK2  | Tyrosine metabolism        | LGG | -0.46207828  |
| UCK2  | Ubiquinone and other ter   | LGG | 0.102111772  |
| UCK2  | Valine, leucine and isoleu | LGG | -0.213817867 |
| UCK2  | Valine, leucine and isoleu | LGG | -0.440130069 |
| UCK2  | Vascular endothelial cell  | LGG | 0.107627757  |
| UCK2  | Vascular smooth muscle c   | LGG | -0.029674052 |
| UCK2  | Vegf_signaling_pathway     | LGG | -0.202265621 |
| UCK2  | Vitamin b6 metabolism      | LGG | -0.240191286 |
| UCK2  | Willert_wnt_signaling      | LGG | -0.017175274 |
| UCK2  | Wnt_beta_catenin_signali   | LGG | 0.432031801  |
| UCKL1 | Abnormal plasma cell       | LGG | -0.196348822 |
| UCKL1 | Activated b cell           | LGG | -0.067736333 |
| UCKL1 | Activated cd4+ t cell      | LGG | -0.189718113 |
| UCKL1 | Activated t cell           | LGG | -0.00946172  |
| UCKL1 | Alanine, aspartate and glu | LGG | -0.370844036 |
| UCKL1 | Alcala_apoptosis           | LGG | 0.005054792  |
| UCKL1 | Alpha-linolenic acid meta  | LGG | -0.055184671 |
| UCKL1 | Amino sugar and nucleoti   | LGG | 0.013219919  |
| UCKL1 | Ampk_pathway               | LGG | 0.268559584  |
| UCKL1 | Angiogenesis               | LGG | -0.021590198 |
| UCKL1 | Arachidonic acid metabo    | LGG | -0.025953026 |
| UCKL1 | Arginine and proline met   | LGG | -0.384328387 |

|       |                             |     |              |
|-------|-----------------------------|-----|--------------|
| UCKL1 | Arginine biosynthesis       | LGG | -0.412355538 |
| UCKL1 | Ascorbate and aldarate me   | LGG | -0.291224839 |
| UCKL1 | Atypical memory b cell      | LGG | 0.042892026  |
| UCKL1 | Axl+siglec6+ dendritic ce   | LGG | -0.182652699 |
| UCKL1 | B cell                      | LGG | -0.184532828 |
| UCKL1 | B1 cell                     | LGG | -0.109983426 |
| UCKL1 | Basal cell                  | LGG | 0.13923565   |
| UCKL1 | Beta-alanine metabolism     | LGG | -0.36326101  |
| UCKL1 | Biosynthesis of unsaturate  | LGG | -0.277444828 |
| UCKL1 | Biotin metabolism           | LGG | -0.07669604  |
| UCKL1 | Butanoate metabolism        | LGG | -0.335047996 |
| UCKL1 | Caffeine metabolism         | LGG | -0.132172224 |
| UCKL1 | Cancer stem cell            | LGG | -0.113086387 |
| UCKL1 | Cancer stem-like cell       | LGG | -0.029758675 |
| UCKL1 | Cd4+ cytotoxic t cell       | LGG | -0.129600095 |
| UCKL1 | Cd4+ memory t cell          | LGG | -0.021604056 |
| UCKL1 | Cd4+ regulatory t cell      | LGG | -0.053112706 |
| UCKL1 | Cd4+ t helper cell          | LGG | -0.126812681 |
| UCKL1 | Cd4+cd25+ regulatory t c    | LGG | -0.118795768 |
| UCKL1 | Cd8+ cytotoxic t cell       | LGG | -0.108648799 |
| UCKL1 | Cd8+ regulatory t cell      | LGG | -0.18290722  |
| UCKL1 | Cell_cycle                  | LGG | 0.079558548  |
| UCKL1 | Chandran_metastasis_top5    | LGG | -0.188911327 |
| UCKL1 | Citrate cycle (tca cycle)   | LGG | -0.352256606 |
| UCKL1 | Cysteine and methionine r   | LGG | -0.139618453 |
| UCKL1 | Cytokine induced killer c   | LGG | -0.036267418 |
| UCKL1 | D-arginine and d-ornithin   | LGG | -0.006496437 |
| UCKL1 | D-glutamine and d-glutan    | LGG | -0.337169661 |
| UCKL1 | Dendritic cell              | LGG | -0.105780183 |
| UCKL1 | Dna_repair                  | LGG | 0.405797646  |
| UCKL1 | Dna_replication             | LGG | 0.228810919  |
| UCKL1 | Double-negative memory      | LGG | 0.184521555  |
| UCKL1 | Drug metabolism - cytoch    | LGG | -0.176688206 |
| UCKL1 | Drug metabolism - other     | LGG | 0.12786625   |
| UCKL1 | E2f_targets                 | LGG | 0.167735686  |
| UCKL1 | Ecm_receptor_interaction    | LGG | -0.086698856 |
| UCKL1 | Effector cd4+ memory t (    | LGG | -0.196418032 |
| UCKL1 | Effector cd8+ memory t (    | LGG | -0.164615671 |
| UCKL1 | Effector memory t cell      | LGG | -0.190172716 |
| UCKL1 | Effector regulatory t (treg | LGG | -0.074271196 |
| UCKL1 | Elvidge_hif1a_targets_up    | LGG | -0.416600225 |
| UCKL1 | Endothelial cell            | LGG | -0.06406041  |
| UCKL1 | Eosinophil                  | LGG | -0.072023503 |

|       |                                          |     |              |
|-------|------------------------------------------|-----|--------------|
| UCKL1 | Ether lipid metabolism                   | LGG | -0.193378683 |
| UCKL1 | Exhausted cd4+ t cell                    | LGG | -0.351860616 |
| UCKL1 | Exhausted cd8+ t cell                    | LGG | -0.112064458 |
| UCKL1 | Exhausted t cell                         | LGG | -0.055017919 |
| UCKL1 | Fat cell (adipocyte)                     | LGG | -0.127971226 |
| UCKL1 | Fatty acid biosynthesis                  | LGG | -0.139281629 |
| UCKL1 | Fatty acid degradation                   | LGG | -0.205253007 |
| UCKL1 | Fatty acid elongation                    | LGG | -0.2854833   |
| UCKL1 | Fibroblast                               | LGG | -0.073205296 |
| UCKL1 | Folate biosynthesis                      | LGG | -0.119170163 |
| UCKL1 | Follicular b cell                        | LGG | -0.119922008 |
| UCKL1 | Follicular dendritic cell                | LGG | -0.12047272  |
| UCKL1 | Follicular helper (tfh) t cell           | LGG | -0.109379412 |
| UCKL1 | Follicular t cell                        | LGG | 0.056760441  |
| UCKL1 | Foxp3+il-17+ t cell                      | LGG | 0.055889868  |
| UCKL1 | Fructose and mannose metabolism          | LGG | 0.003782381  |
| UCKL1 | G2m_checkpoint                           | LGG | 0.075653796  |
| UCKL1 | Galactose metabolism                     | LGG | 0.047360711  |
| UCKL1 | Galie_tumor_stemness_genes               | LGG | -0.220515151 |
| UCKL1 | Glutathione metabolism                   | LGG | -0.047140508 |
| UCKL1 | Glycerolipid metabolism                  | LGG | -0.284049168 |
| UCKL1 | Glycerophospholipid metabolism           | LGG | -0.177320903 |
| UCKL1 | Glycine, serine and threonine metabolism | LGG | -0.090527493 |
| UCKL1 | Glycolysis / gluconeogenesis             | LGG | -0.270371416 |
| UCKL1 | Glycosaminoglycan biosynthesis           | LGG | 0.205335108  |
| UCKL1 | Glycosaminoglycan biosynthesis           | LGG | -0.344659891 |
| UCKL1 | Glycosaminoglycan biosynthesis           | LGG | -0.170962066 |
| UCKL1 | Glycosaminoglycan degradation            | LGG | 0.048901161  |
| UCKL1 | Glycosphingolipid biosynthesis           | LGG | -0.346590802 |
| UCKL1 | Glycosphingolipid biosynthesis           | LGG | -0.227755174 |
| UCKL1 | Glycosphingolipid biosynthesis           | LGG | -0.210718414 |
| UCKL1 | Glycosylphosphatidylinositol             | LGG | 0.170461771  |
| UCKL1 | Glyoxylate and dicarboxylate metabolism  | LGG | -0.018863984 |
| UCKL1 | Granulocyte                              | LGG | -0.043126828 |
| UCKL1 | Hedgehog signaling                       | LGG | -0.272196127 |
| UCKL1 | Histidine metabolism                     | LGG | -0.248169265 |
| UCKL1 | Hypoxia                                  | LGG | -0.103277827 |
| UCKL1 | Il-17alpha t cell                        | LGG | -0.112359869 |
| UCKL1 | Il2_stat5_signaling                      | LGG | -0.138368839 |
| UCKL1 | Il6_jak_stat3_signaling                  | LGG | -0.112598396 |
| UCKL1 | Immune_checkpoints_tumor                 | LGG | -0.180527327 |
| UCKL1 | Immune_inhibition_cytokines              | LGG | 0.039248857  |
| UCKL1 | Inositol phosphate metabolism            | LGG | -0.575563623 |

|       |                             |     |              |
|-------|-----------------------------|-----|--------------|
| UCKL1 | Interleukin_6_signaling     | LGG | -0.331401567 |
| UCKL1 | Jaeger_metastasis_up        | LGG | -0.081388574 |
| UCKL1 | Jain_nfkb_signaling         | LGG | 0.202580077  |
| UCKL1 | Kras_signaling_up           | LGG | -0.353801307 |
| UCKL1 | Linoleic acid metabolism    | LGG | -0.038162954 |
| UCKL1 | Lipoic acid metabolism      | LGG | 0.281802636  |
| UCKL1 | Lysine degradation          | LGG | -0.0218328   |
| UCKL1 | Lysosome                    | LGG | -0.07218124  |
| UCKL1 | M1 macrophage               | LGG | -0.147232629 |
| UCKL1 | M2 macrophage               | LGG | -0.110965289 |
| UCKL1 | Mannose type o-glycan bi    | LGG | 0.214940359  |
| UCKL1 | Mapk_signaling_pathway      | LGG | -0.456337967 |
| UCKL1 | Mapk3_erk1_activation       | LGG | -0.431009352 |
| UCKL1 | Marginal zone b cell        | LGG | -0.136526854 |
| UCKL1 | Memory b cell               | LGG | -0.162420915 |
| UCKL1 | Mesenchymal cell            | LGG | 0.096035794  |
| UCKL1 | Mesenchymal stem cell       | LGG | -0.147135503 |
| UCKL1 | Metabolism of xenobiotic    | LGG | -0.126133601 |
| UCKL1 | Migrating cancer stem cel   | LGG | -0.101997386 |
| UCKL1 | Mitotic_spindle             | LGG | -0.170832123 |
| UCKL1 | Monocyte                    | LGG | -0.069074134 |
| UCKL1 | Mtor_signaling_pathway      | LGG | -0.281676296 |
| UCKL1 | Mtorc1_signaling            | LGG | -0.316117183 |
| UCKL1 | Mucin type o-glycan bios    | LGG | -0.491295482 |
| UCKL1 | Myc_targets_v1              | LGG | 0.158035405  |
| UCKL1 | Myeloid cell                | LGG | -0.156741255 |
| UCKL1 | N-glycan biosynthesis       | LGG | -0.020370994 |
| UCKL1 | Naive b cell                | LGG | -0.10031499  |
| UCKL1 | Naive cd4+ t cell           | LGG | -0.303780474 |
| UCKL1 | Naive cd8+ t cell           | LGG | -0.166128999 |
| UCKL1 | Natural killer cell         | LGG | -0.100120505 |
| UCKL1 | Natural killer t (nkt) cell | LGG | 0.259426456  |
| UCKL1 | Natural regulatory t (treg) | LGG | -0.148119874 |
| UCKL1 | Neomycin, kanamycin an      | LGG | -0.129446193 |
| UCKL1 | Neutrophil                  | LGG | -0.080456419 |
| UCKL1 | Nicotinate and nicotinami   | LGG | -0.13492534  |
| UCKL1 | Nitrogen metabolism         | LGG | -0.332598922 |
| UCKL1 | Nod_like_receptor_signal    | LGG | -0.210555951 |
| UCKL1 | Notch_signaling             | LGG | -0.089244089 |
| UCKL1 | One carbon pool by folate   | LGG | 0.233933     |
| UCKL1 | Other glycan degradation    | LGG | 0.322588083  |
| UCKL1 | Other types of o-glycan b   | LGG | 0.443763296  |
| UCKL1 | Oxidative phosphorylatior   | LGG | 0.073812648  |

|       |                            |     |              |
|-------|----------------------------|-----|--------------|
| UCKL1 | P53_pathway                | LGG | 0.026214496  |
| UCKL1 | P53_signaling_pathway      | LGG | 0.171430071  |
| UCKL1 | Pantothenate and coa bios  | LGG | -0.192460341 |
| UCKL1 | Pentose and glucuronate i  | LGG | -0.177387397 |
| UCKL1 | Pentose phosphate pathwa   | LGG | -0.070256786 |
| UCKL1 | Pericyte                   | LGG | -0.009610168 |
| UCKL1 | Phenylalanine metabolism   | LGG | -0.126685038 |
| UCKL1 | Phenylalanine, tyrosine ar | LGG | -0.207537542 |
| UCKL1 | Phosphonate and phosphir   | LGG | -0.454115239 |
| UCKL1 | Pi3k_akt_activation        | LGG | -0.387405217 |
| UCKL1 | Pi3k_akt_mtor_signaling    | LGG | -0.346388767 |
| UCKL1 | Porphyrin and chlorophyl   | LGG | -0.15435773  |
| UCKL1 | Primary bile acid biosynt  | LGG | -0.326639762 |
| UCKL1 | Propanoate metabolism      | LGG | -0.371849494 |
| UCKL1 | Purine metabolism          | LGG | 0.037633698  |
| UCKL1 | Pyrimidine metabolism      | LGG | 0.336028407  |
| UCKL1 | Pyruvate metabolism        | LGG | -0.28889497  |
| UCKL1 | Regulation_of_autophagy    | LGG | -0.228493408 |
| UCKL1 | Retinol metabolism         | LGG | -0.202516914 |
| UCKL1 | Riboflavin metabolism      | LGG | 0.063093791  |
| UCKL1 | Schmahl_pdgf_signaling     | LGG | -0.261850639 |
| UCKL1 | Selenocompound metabol     | LGG | -0.048869583 |
| UCKL1 | Signaling_by_hippo         | LGG | -0.413346393 |
| UCKL1 | Sphingolipid metabolism    | LGG | -0.358369133 |
| UCKL1 | Starch and sucrose metabo  | LGG | -0.14396703  |
| UCKL1 | Steroid biosynthesis       | LGG | 0.139593108  |
| UCKL1 | Steroid hormone biosynth   | LGG | -0.122844485 |
| UCKL1 | Sulfur metabolism          | LGG | -0.126379517 |
| UCKL1 | Synthesis and degradation  | LGG | -0.331821449 |
| UCKL1 | T helper cell              | LGG | -0.267167198 |
| UCKL1 | T helper1 (th1) cell       | LGG | -0.153142368 |
| UCKL1 | T helper17 (th17) cell     | LGG | -0.174047763 |
| UCKL1 | T helper2 (th2) cell       | LGG | -0.088133413 |
| UCKL1 | T helper9 (th9) cell       | LGG | -0.105666848 |
| UCKL1 | Taurine and hypotaurine r  | LGG | 0.313914106  |
| UCKL1 | Terpenoid backbone biosy   | LGG | -0.123768885 |
| UCKL1 | Tgf_beta_signaling_pathw   | LGG | -0.337600129 |
| UCKL1 | Thiamine metabolism        | LGG | -0.134877245 |
| UCKL1 | Tnfa_signaling_via_nfkb    | LGG | -0.090371257 |
| UCKL1 | Tryptophan metabolism      | LGG | -0.252962405 |
| UCKL1 | Tumor endothelial cell     | LGG | 0.188244304  |
| UCKL1 | Tyrosine metabolism        | LGG | -0.189400078 |
| UCKL1 | Ubiquinone and other ter   | LGG | 0.189415596  |

|       |                            |     |              |
|-------|----------------------------|-----|--------------|
| UCKL1 | Valine, leucine and isoleu | LGG | 0.217131228  |
| UCKL1 | Valine, leucine and isoleu | LGG | -0.278944567 |
| UCKL1 | Vascular endothelial cell  | LGG | -0.023107628 |
| UCKL1 | Vascular smooth muscle c   | LGG | -0.186542942 |
| UCKL1 | Vegf_signaling_pathway     | LGG | -0.309866562 |
| UCKL1 | Vitamin b6 metabolism      | LGG | -0.198260701 |
| UCKL1 | Willert_wnt_signaling      | LGG | -0.071489948 |
| UCKL1 | Wnt_beta_catenin_signali   | LGG | 0.19623854   |
| UPP1  | Abnormal plasma cell       | LGG | 0.117296417  |
| UPP1  | Activated b cell           | LGG | 0.665381652  |
| UPP1  | Activated cd4+ t cell      | LGG | 0.510465849  |
| UPP1  | Activated t cell           | LGG | 0.49553064   |
| UPP1  | Alanine, aspartate and glu | LGG | -0.087911275 |
| UPP1  | Alcala_apoptosis           | LGG | 0.277216884  |
| UPP1  | Alpha-linolenic acid meta  | LGG | 0.270546734  |
| UPP1  | Amino sugar and nucleoti   | LGG | 0.52105798   |
| UPP1  | Ampk_pathway               | LGG | -0.165410381 |
| UPP1  | Angiogenesis               | LGG | 0.571410076  |
| UPP1  | Arachidonic acid metabol   | LGG | 0.418595427  |
| UPP1  | Arginine and proline metæ  | LGG | 0.281770859  |
| UPP1  | Arginine biosynthesis      | LGG | -0.144501231 |
| UPP1  | Ascorbate and aldarate mε  | LGG | -0.28695692  |
| UPP1  | Atypical memory b cell     | LGG | -0.025807732 |
| UPP1  | Axl+siglec6+ dendritic ce  | LGG | 0.647668536  |
| UPP1  | B cell                     | LGG | 0.528838603  |
| UPP1  | B1 cell                    | LGG | 0.425892963  |
| UPP1  | Basal cell                 | LGG | 0.717177679  |
| UPP1  | Beta-alanine metabolism    | LGG | 0.118042175  |
| UPP1  | Biosynthesis of unsaturate | LGG | -0.162553976 |
| UPP1  | Biotin metabolism          | LGG | -0.043435496 |
| UPP1  | Butanoate metabolism       | LGG | -0.251222088 |
| UPP1  | Caffeine metabolism        | LGG | 0.093359658  |
| UPP1  | Cancer stem cell           | LGG | 0.491272342  |
| UPP1  | Cancer stem-like cell      | LGG | 0.450037511  |
| UPP1  | Cd4+ cytotoxic t cell      | LGG | 0.584495624  |
| UPP1  | Cd4+ memory t cell         | LGG | 0.287976121  |
| UPP1  | Cd4+ regulatory t cell     | LGG | 0.447946752  |
| UPP1  | Cd4+ t helper cell         | LGG | 0.524577111  |
| UPP1  | Cd4+cd25+ regulatory t c   | LGG | 0.525581544  |
| UPP1  | Cd8+ cytotoxic t cell      | LGG | 0.457770286  |
| UPP1  | Cd8+ regulatory t cell     | LGG | 0.455016699  |
| UPP1  | Cell_cycle                 | LGG | -0.027253038 |
| UPP1  | Chandran_metastasis_topç   | LGG | -0.541653815 |



|      |                             |     |              |
|------|-----------------------------|-----|--------------|
| UPP1 | Citrate cycle (tca cycle)   | LGG | -0.109872332 |
| UPP1 | Cysteine and methionine r   | LGG | 0.168690328  |
| UPP1 | Cytokine induced killer c   | LGG | 0.44726993   |
| UPP1 | D-arginine and d-ornithin   | LGG | -0.105923625 |
| UPP1 | D-glutamine and d-glutan    | LGG | -0.4695738   |
| UPP1 | Dendritic cell              | LGG | 0.572971881  |
| UPP1 | Dna_repair                  | LGG | 0.134984011  |
| UPP1 | Dna_replication             | LGG | 0.147001204  |
| UPP1 | Double-negative memory      | LGG | 0.290307406  |
| UPP1 | Drug metabolism - cytoch    | LGG | 0.181302001  |
| UPP1 | Drug metabolism - other c   | LGG | 0.183579249  |
| UPP1 | E2f_targets                 | LGG | 0.017677385  |
| UPP1 | Ecm_receptor_interaction    | LGG | 0.509561792  |
| UPP1 | Effector cd4+ memory t (    | LGG | 0.456770242  |
| UPP1 | Effector cd8+ memory t (    | LGG | 0.621068401  |
| UPP1 | Effector memory t cell      | LGG | 0.306836227  |
| UPP1 | Effector regulatory t (treg | LGG | 0.469688943  |
| UPP1 | Elvidge_hif1a_targets_up    | LGG | 0.185708425  |
| UPP1 | Endothelial cell            | LGG | 0.536959637  |
| UPP1 | Eosinophil                  | LGG | 0.529742318  |
| UPP1 | Ether lipid metabolism      | LGG | 0.240316093  |
| UPP1 | Exhausted cd4+ t cell       | LGG | 0.461933074  |
| UPP1 | Exhausted cd8+ t cell       | LGG | 0.586501107  |
| UPP1 | Exhausted t cell            | LGG | 0.574225467  |
| UPP1 | Fat cell (adipocyte)        | LGG | 0.084122118  |
| UPP1 | Fatty acid biosynthesis     | LGG | -0.179170368 |
| UPP1 | Fatty acid degradation      | LGG | -0.021307057 |
| UPP1 | Fatty acid elongation       | LGG | 0.040784125  |
| UPP1 | Fibroblast                  | LGG | 0.536124569  |
| UPP1 | Folate biosynthesis         | LGG | 0.00139806   |
| UPP1 | Follicular b cell           | LGG | 0.358524751  |
| UPP1 | Follicular dendritic cell   | LGG | 0.042011527  |
| UPP1 | Follicular helper (tfh) t c | LGG | 0.436701742  |
| UPP1 | Follicular t cell           | LGG | 0.427870897  |
| UPP1 | Foxp3+il-17+ t cell         | LGG | -0.197979071 |
| UPP1 | Fructose and mannose me     | LGG | 0.395732966  |
| UPP1 | G2m_checkpoint              | LGG | -0.088379054 |
| UPP1 | Galactose metabolism        | LGG | 0.53677453   |
| UPP1 | Galie_tumor_stemness_ge     | LGG | -0.246571144 |
| UPP1 | Glutathione metabolism      | LGG | 0.579444871  |
| UPP1 | Glycerolipid metabolism     | LGG | -0.162579292 |
| UPP1 | Glycerophospholipid met     | LGG | 0.231240898  |
| UPP1 | Glycine, serine and threor  | LGG | 0.104486489  |

|      |                           |     |              |
|------|---------------------------|-----|--------------|
| UPP1 | Glycolysis / gluconeogene | LGG | 0.165553682  |
| UPP1 | Glycosaminoglycan biosyn  | LGG | 0.352173661  |
| UPP1 | Glycosaminoglycan biosyn  | LGG | 0.226147144  |
| UPP1 | Glycosaminoglycan biosyn  | LGG | 0.553219653  |
| UPP1 | Glycosaminoglycan degra   | LGG | 0.461805743  |
| UPP1 | Glycosphingolipid biosyn  | LGG | 0.274268989  |
| UPP1 | Glycosphingolipid biosyn  | LGG | 0.503614234  |
| UPP1 | Glycosphingolipid biosyn  | LGG | 0.102577366  |
| UPP1 | Glycosylphosphatidylinos  | LGG | 0.300285796  |
| UPP1 | Glyoxylate and dicarboxy  | LGG | -0.279813648 |
| UPP1 | Granulocyte               | LGG | 0.574214088  |
| UPP1 | Hedgehog_signaling        | LGG | -0.261538124 |
| UPP1 | Histidine metabolism      | LGG | 0.237507185  |
| UPP1 | Hypoxia                   | LGG | 0.522920214  |
| UPP1 | Il-17alpha t cell         | LGG | 0.447761158  |
| UPP1 | Il2_stat5_signaling       | LGG | 0.61373496   |
| UPP1 | Il6_jak_stat3_signaling   | LGG | 0.57312498   |
| UPP1 | Immune_checkpoints_tur    | LGG | 0.517362493  |
| UPP1 | Immune_inhibition_cytok   | LGG | 0.403327111  |
| UPP1 | Inositol phosphate metabo | LGG | -0.235928287 |
| UPP1 | Interleukin_6_signaling   | LGG | 0.313207312  |
| UPP1 | Jaeger_metastasis_up      | LGG | 0.470966363  |
| UPP1 | Jain_nfkb_signaling       | LGG | 0.004011602  |
| UPP1 | Kras_signaling_up         | LGG | 0.517681739  |
| UPP1 | Linoleic acid metabolism  | LGG | 0.082285115  |
| UPP1 | Lipoic acid metabolism    | LGG | -0.100192219 |
| UPP1 | Lysine degradation        | LGG | -0.473676059 |
| UPP1 | Lysosome                  | LGG | 0.512919163  |
| UPP1 | M1 macrophage             | LGG | 0.513698972  |
| UPP1 | M2 macrophage             | LGG | 0.4832285    |
| UPP1 | Mannose type o-glycan bi  | LGG | 0.369760077  |
| UPP1 | Mapk_signaling_pathway    | LGG | 0.151138727  |
| UPP1 | Mapk3_erk1_activation     | LGG | 0.124729612  |
| UPP1 | Marginal zone b cell      | LGG | 0.365733806  |
| UPP1 | Memory b cell             | LGG | 0.343623788  |
| UPP1 | Mesenchymal cell          | LGG | 0.658046448  |
| UPP1 | Mesenchymal stem cell     | LGG | 0.566574332  |
| UPP1 | Metabolism of xenobiotic  | LGG | 0.179509593  |
| UPP1 | Migrating cancer stem cel | LGG | 0.491534409  |
| UPP1 | Mitotic_spindle           | LGG | -0.238140886 |
| UPP1 | Monocyte                  | LGG | 0.665160477  |
| UPP1 | Mtor_signaling_pathway    | LGG | -0.388821297 |
| UPP1 | Mtorc1_signaling          | LGG | 0.310452532  |

|      |                                                   |     |              |
|------|---------------------------------------------------|-----|--------------|
| UPP1 | Mucin type o-glycan biosynthesis                  | LGG | 0.195011248  |
| UPP1 | Myc_targets_v1                                    | LGG | -0.082517093 |
| UPP1 | Myeloid cell                                      | LGG | 0.47231005   |
| UPP1 | N-glycan biosynthesis                             | LGG | 0.270391983  |
| UPP1 | Naive b cell                                      | LGG | -0.329413048 |
| UPP1 | Naive cd4+ t cell                                 | LGG | 0.139672312  |
| UPP1 | Naive cd8+ t cell                                 | LGG | -0.418931794 |
| UPP1 | Natural killer cell                               | LGG | 0.52538969   |
| UPP1 | Natural killer t (nkt) cell                       | LGG | 0.418914648  |
| UPP1 | Natural regulatory t (treg) cell                  | LGG | 0.480009956  |
| UPP1 | Neomycin, kanamycin and streptomycin              | LGG | 0.550411846  |
| UPP1 | Neutrophil                                        | LGG | 0.558905558  |
| UPP1 | Nicotinate and nicotinamide metabolism            | LGG | 0.567297216  |
| UPP1 | Nitrogen metabolism                               | LGG | 0.166441816  |
| UPP1 | Nod_like_receptor_signaling                       | LGG | 0.329355553  |
| UPP1 | Notch_signaling                                   | LGG | 0.269166995  |
| UPP1 | One carbon pool by folate                         | LGG | -0.100527606 |
| UPP1 | Other glycan degradation                          | LGG | 0.356499569  |
| UPP1 | Other types of o-glycan biosynthesis              | LGG | 0.352844555  |
| UPP1 | Oxidative phosphorylation                         | LGG | 0.085306777  |
| UPP1 | P53_pathway                                       | LGG | 0.440792716  |
| UPP1 | P53_signaling_pathway                             | LGG | 0.152870195  |
| UPP1 | Pantothenate and coa biosynthesis                 | LGG | 0.386936668  |
| UPP1 | Pentose and glucuronate interconversions          | LGG | -0.039210454 |
| UPP1 | Pentose phosphate pathway                         | LGG | 0.259082714  |
| UPP1 | Pericyte                                          | LGG | 0.438367251  |
| UPP1 | Phenylalanine metabolism                          | LGG | 0.448791056  |
| UPP1 | Phenylalanine, tyrosine and tryptophan metabolism | LGG | 0.080998216  |
| UPP1 | Phosphonate and phosphite metabolism              | LGG | 0.196389491  |
| UPP1 | Pi3k_akt_activation                               | LGG | -0.425079826 |
| UPP1 | Pi3k_akt_mtor_signaling                           | LGG | 0.412870727  |
| UPP1 | Porphyrin and chlorophyll metabolism              | LGG | 0.008831098  |
| UPP1 | Primary bile acid biosynthesis                    | LGG | 0.401846883  |
| UPP1 | Propanoate metabolism                             | LGG | -0.295363248 |
| UPP1 | Purine metabolism                                 | LGG | 0.013596016  |
| UPP1 | Pyrimidine metabolism                             | LGG | 0.12298721   |
| UPP1 | Pyruvate metabolism                               | LGG | -0.147580848 |
| UPP1 | Regulation_of_autophagy                           | LGG | -0.011624502 |
| UPP1 | Retinol metabolism                                | LGG | 0.092938838  |
| UPP1 | Riboflavin metabolism                             | LGG | 0.415934545  |
| UPP1 | Schmahl_pdgf_signaling                            | LGG | -0.126536513 |
| UPP1 | Selenocompound metabolism                         | LGG | -0.237521123 |
| UPP1 | Signaling_by_hippo                                | LGG | -0.093712214 |

|      |                            |     |              |
|------|----------------------------|-----|--------------|
| UPP1 | Sphingolipid metabolism    | LGG | -0.100327367 |
| UPP1 | Starch and sucrose metabo  | LGG | 0.570700985  |
| UPP1 | Steroid biosynthesis       | LGG | -0.171483325 |
| UPP1 | Steroid hormone biosynth   | LGG | -0.173689609 |
| UPP1 | Sulfur metabolism          | LGG | -0.116969409 |
| UPP1 | Synthesis and degradation  | LGG | -0.117587291 |
| UPP1 | T helper cell              | LGG | 0.379930882  |
| UPP1 | T helper1 (th1) cell       | LGG | 0.590668714  |
| UPP1 | T helper17 (th17) cell     | LGG | 0.5297183    |
| UPP1 | T helper2 (th2) cell       | LGG | 0.628947974  |
| UPP1 | T helper9 (th9) cell       | LGG | 0.581358131  |
| UPP1 | Taurine and hypotaurine r  | LGG | -0.338584513 |
| UPP1 | Terpenoid backbone biosy   | LGG | -0.320829794 |
| UPP1 | Tgf_beta_signaling_pathw   | LGG | -0.233333342 |
| UPP1 | Thiamine metabolism        | LGG | 0.131155193  |
| UPP1 | Tnfa_signaling_via_nfk     | LGG | 0.500107549  |
| UPP1 | Tryptophan metabolism      | LGG | 0.238432568  |
| UPP1 | Tumor endothelial cell     | LGG | 0.162534082  |
| UPP1 | Tyrosine metabolism        | LGG | 0.355186907  |
| UPP1 | Ubiquinone and other ter   | LGG | 0.204649788  |
| UPP1 | Valine, leucine and isoleu | LGG | 0.435063522  |
| UPP1 | Valine, leucine and isoleu | LGG | -0.052521312 |
| UPP1 | Vascular endothelial cell  | LGG | 0.45948343   |
| UPP1 | Vascular smooth muscle c   | LGG | 0.132247339  |
| UPP1 | Vegf_signaling_pathway     | LGG | 0.22088721   |
| UPP1 | Vitamin b6 metabolism      | LGG | 0.008617736  |
| UPP1 | Willert_wnt_signaling      | LGG | 0.056313049  |
| UPP1 | Wnt_beta_catenin_signali   | LGG | -0.290738213 |
| UPP2 | Abnormal plasma cell       | LGG | -0.068541492 |
| UPP2 | Activated b cell           | LGG | -0.192872869 |
| UPP2 | Activated cd4+ t cell      | LGG | -0.066596022 |
| UPP2 | Activated t cell           | LGG | -0.425756357 |
| UPP2 | Alanine, aspartate and glu | LGG | 0.402562361  |
| UPP2 | Alcala_apoptosis           | LGG | -0.090388446 |
| UPP2 | Alpha-linolenic acid meta  | LGG | 0.261483825  |
| UPP2 | Amino sugar and nucleoti   | LGG | -0.233832128 |
| UPP2 | Ampk_pathway               | LGG | -0.200790086 |
| UPP2 | Angiogenesis               | LGG | -0.328413595 |
| UPP2 | Arachidonic acid metabo    | LGG | 0.185311577  |
| UPP2 | Arginine and proline met   | LGG | 0.304652722  |
| UPP2 | Arginine biosynthesis      | LGG | 0.37762537   |
| UPP2 | Ascorbate and aldarate m   | LGG | 0.210192559  |
| UPP2 | Atypical memory b cell     | LGG | -0.136028686 |

|      |                              |     |              |
|------|------------------------------|-----|--------------|
| UPP2 | Axl+siglec6+ dendritic ce    | LGG | 0.027800096  |
| UPP2 | B cell                       | LGG | -0.099840828 |
| UPP2 | B1 cell                      | LGG | -0.193316626 |
| UPP2 | Basal cell                   | LGG | -0.220146628 |
| UPP2 | Beta-alanine metabolism      | LGG | 0.340940093  |
| UPP2 | Biosynthesis of unsaturate   | LGG | 0.211536563  |
| UPP2 | Biotin metabolism            | LGG | -0.25340701  |
| UPP2 | Butanoate metabolism         | LGG | 0.478166062  |
| UPP2 | Caffeine metabolism          | LGG | -0.096135835 |
| UPP2 | Cancer stem cell             | LGG | -0.308579777 |
| UPP2 | Cancer stem-like cell        | LGG | -0.223664622 |
| UPP2 | Cd4+ cytotoxic t cell        | LGG | -0.050865898 |
| UPP2 | Cd4+ memory t cell           | LGG | -0.330456403 |
| UPP2 | Cd4+ regulatory t cell       | LGG | -0.112240138 |
| UPP2 | Cd4+ t helper cell           | LGG | -0.08261367  |
| UPP2 | Cd4+cd25+ regulatory t c     | LGG | -0.1208193   |
| UPP2 | Cd8+ cytotoxic t cell        | LGG | -0.177472796 |
| UPP2 | Cd8+ regulatory t cell       | LGG | -0.223500281 |
| UPP2 | Cell_cycle                   | LGG | -0.482025609 |
| UPP2 | Chandran_metastasis_top      | LGG | -0.119506909 |
| UPP2 | Citrate cycle (tca cycle)    | LGG | 0.190176851  |
| UPP2 | Cysteine and methionine r    | LGG | 0.287542958  |
| UPP2 | Cytokine induced killer c    | LGG | -0.23007679  |
| UPP2 | D-arginine and d-ornithin    | LGG | 0.075958304  |
| UPP2 | D-glutamine and d-glutan     | LGG | 0.519146019  |
| UPP2 | Dendritic cell               | LGG | -0.083252454 |
| UPP2 | Dna_repair                   | LGG | -0.332884463 |
| UPP2 | Dna_replication              | LGG | -0.475748632 |
| UPP2 | Double-negative memory       | LGG | -0.349252319 |
| UPP2 | Drug metabolism - cytoch     | LGG | 0.277596915  |
| UPP2 | Drug metabolism - other      | LGG | 0.064335876  |
| UPP2 | E2f_targets                  | LGG | -0.500649303 |
| UPP2 | Ecm_receptor_interaction     | LGG | -0.282834333 |
| UPP2 | Effector cd4+ memory t       | LGG | -0.076597008 |
| UPP2 | Effector cd8+ memory t       | LGG | -0.023991545 |
| UPP2 | Effector memory t cell       | LGG | 0.012030578  |
| UPP2 | Effector regulatory t (treg) | LGG | -0.201094497 |
| UPP2 | Elvidge_hif1a_targets_up     | LGG | -0.284274536 |
| UPP2 | Endothelial cell             | LGG | -0.336096049 |
| UPP2 | Eosinophil                   | LGG | -0.044681211 |
| UPP2 | Ether lipid metabolism       | LGG | 0.251725091  |
| UPP2 | Exhausted cd4+ t cell        | LGG | -0.045723516 |
| UPP2 | Exhausted cd8+ t cell        | LGG | -0.146198629 |

|      |                              |     |              |
|------|------------------------------|-----|--------------|
| UPP2 | Exhausted t cell             | LGG | -0.147398867 |
| UPP2 | Fat cell (adipocyte)         | LGG | 0.241137976  |
| UPP2 | Fatty acid biosynthesis      | LGG | 0.166090373  |
| UPP2 | Fatty acid degradation       | LGG | 0.315878641  |
| UPP2 | Fatty acid elongation        | LGG | 0.224529252  |
| UPP2 | Fibroblast                   | LGG | -0.262547307 |
| UPP2 | Folate biosynthesis          | LGG | 0.098625384  |
| UPP2 | Follicular b cell            | LGG | -0.049411958 |
| UPP2 | Follicular dendritic cell    | LGG | -0.018528144 |
| UPP2 | Follicular helper (tfh) t ce | LGG | -0.100534493 |
| UPP2 | Follicular t cell            | LGG | -0.263658412 |
| UPP2 | Foxp3+il-17+ t cell          | LGG | -0.281033645 |
| UPP2 | Fructose and mannose me      | LGG | 0.063409716  |
| UPP2 | G2m_checkpoint               | LGG | -0.497280911 |
| UPP2 | Galactose metabolism         | LGG | -0.193809345 |
| UPP2 | Galie_tumor_stemness_ge      | LGG | 0.029023212  |
| UPP2 | Glutathione metabolism       | LGG | 0.003055228  |
| UPP2 | Glycerolipid metabolism      | LGG | 0.349813236  |
| UPP2 | Glycerophospholipid metæ     | LGG | 0.29722019   |
| UPP2 | Glycine, serine and threor   | LGG | 0.277026866  |
| UPP2 | Glycolysis / gluconeogene    | LGG | 0.173628646  |
| UPP2 | Glycosaminoglycan biosy      | LGG | -0.317830215 |
| UPP2 | Glycosaminoglycan biosy      | LGG | 0.025685509  |
| UPP2 | Glycosaminoglycan biosy      | LGG | -0.004183904 |
| UPP2 | Glycosaminoglycan degra      | LGG | -0.209208549 |
| UPP2 | Glycosphingolipid biosyn     | LGG | -0.146624095 |
| UPP2 | Glycosphingolipid biosyn     | LGG | -0.095958379 |
| UPP2 | Glycosphingolipid biosyn     | LGG | 0.462953983  |
| UPP2 | Glycosylphosphatidylinos     | LGG | -0.294586824 |
| UPP2 | Glyoxylate and dicarboxy     | LGG | 0.115758333  |
| UPP2 | Granulocyte                  | LGG | -0.109966272 |
| UPP2 | Hedgehog_signaling           | LGG | -0.024463291 |
| UPP2 | Histidine metabolism         | LGG | 0.246218286  |
| UPP2 | Hypoxia                      | LGG | -0.115717684 |
| UPP2 | Il-17alpha t cell            | LGG | -0.290160996 |
| UPP2 | Il2_stat5_signaling          | LGG | -0.19172076  |
| UPP2 | Il6_jak_stat3_signaling      | LGG | -0.193236503 |
| UPP2 | Immune_checkpoints_turr      | LGG | -0.139967377 |
| UPP2 | Immune_inhibition_cytok      | LGG | 0.07207108   |
| UPP2 | Inositol phosphate metabo    | LGG | 0.374111446  |
| UPP2 | Interleukin_6_signaling      | LGG | -0.15681473  |
| UPP2 | Jaeger_metastasis_up         | LGG | -0.364911404 |
| UPP2 | Jain_nfkb_signaling          | LGG | -0.394586361 |

|      |                             |     |              |
|------|-----------------------------|-----|--------------|
| UPP2 | Kras_signaling_up           | LGG | -0.085615397 |
| UPP2 | Linoleic acid metabolism    | LGG | 0.304839475  |
| UPP2 | Lipoic acid metabolism      | LGG | -0.030793191 |
| UPP2 | Lysine degradation          | LGG | 0.004057817  |
| UPP2 | Lysosome                    | LGG | -0.190008282 |
| UPP2 | M1 macrophage               | LGG | -0.042599246 |
| UPP2 | M2 macrophage               | LGG | -0.054021823 |
| UPP2 | Mannose type o-glycan bi    | LGG | -0.013391462 |
| UPP2 | Mapk_signaling_pathway      | LGG | 0.232759078  |
| UPP2 | Mapk3_erk1_activation       | LGG | 0.075470393  |
| UPP2 | Marginal zone b cell        | LGG | -0.064056345 |
| UPP2 | Memory b cell               | LGG | -0.124185165 |
| UPP2 | Mesenchymal cell            | LGG | -0.307540702 |
| UPP2 | Mesenchymal stem cell       | LGG | -0.180934912 |
| UPP2 | Metabolism of xenobiotic    | LGG | 0.307306949  |
| UPP2 | Migrating cancer stem cel   | LGG | -0.039084615 |
| UPP2 | Mitotic_spindle             | LGG | -0.244505899 |
| UPP2 | Monocyte                    | LGG | -0.09599012  |
| UPP2 | Mtor_signaling_pathway      | LGG | 0.207669141  |
| UPP2 | Mtorc1_signaling            | LGG | -0.201567234 |
| UPP2 | Mucin type o-glycan biosy   | LGG | 0.022384502  |
| UPP2 | Myc_targets_v1              | LGG | -0.285670047 |
| UPP2 | Myeloid cell                | LGG | -0.072300149 |
| UPP2 | N-glycan biosynthesis       | LGG | -0.501731364 |
| UPP2 | Naive b cell                | LGG | 0.123661983  |
| UPP2 | Naive cd4+ t cell           | LGG | 0.093517795  |
| UPP2 | Naive cd8+ t cell           | LGG | 0.208162746  |
| UPP2 | Natural killer cell         | LGG | -0.167660893 |
| UPP2 | Natural killer t (nkt) cell | LGG | -0.334931344 |
| UPP2 | Natural regulatory t (treg) | LGG | -0.125972494 |
| UPP2 | Neomycin, kanamycin and     | LGG | 0.002677256  |
| UPP2 | Neutrophil                  | LGG | -0.098951553 |
| UPP2 | Nicotinate and nicotinami   | LGG | -0.012112605 |
| UPP2 | Nitrogen metabolism         | LGG | 0.295375394  |
| UPP2 | Nod_like_receptor_signal    | LGG | 0.137949218  |
| UPP2 | Notch_signaling             | LGG | 0.068081645  |
| UPP2 | One carbon pool by folate   | LGG | -0.317561809 |
| UPP2 | Other glycan degradation    | LGG | -0.337960362 |
| UPP2 | Other types of o-glycan b   | LGG | -0.141460534 |
| UPP2 | Oxidative phosphorylatior   | LGG | 0.172105995  |
| UPP2 | P53_pathway                 | LGG | -0.196084334 |
| UPP2 | P53_signaling_pathway       | LGG | -0.573578923 |
| UPP2 | Pantothenate and coa bios   | LGG | -0.111119939 |

|      |                            |     |              |
|------|----------------------------|-----|--------------|
| UPP2 | Pentose and glucuronate i  | LGG | 0.137746279  |
| UPP2 | Pentose phosphate pathwa   | LGG | 0.1125435    |
| UPP2 | Pericyte                   | LGG | -0.340117091 |
| UPP2 | Phenylalanine metabolism   | LGG | 0.127757559  |
| UPP2 | Phenylalanine, tyrosine ar | LGG | 0.267374771  |
| UPP2 | Phosphonate and phosphir   | LGG | 0.190981552  |
| UPP2 | Pi3k_akt_activation        | LGG | 0.028896567  |
| UPP2 | Pi3k_akt_mtor_signaling    | LGG | -0.20244271  |
| UPP2 | Porphyrin and chlorophyl   | LGG | 0.116543128  |
| UPP2 | Primary bile acid biosynt  | LGG | 0.329405709  |
| UPP2 | Propanoate metabolism      | LGG | 0.273327706  |
| UPP2 | Purine metabolism          | LGG | -0.242821977 |
| UPP2 | Pyrimidine metabolism      | LGG | -0.397709924 |
| UPP2 | Pyruvate metabolism        | LGG | 0.304887245  |
| UPP2 | Regulation_of_autophagy    | LGG | 0.299792364  |
| UPP2 | Retinol metabolism         | LGG | 0.365952497  |
| UPP2 | Riboflavin metabolism      | LGG | -0.124487999 |
| UPP2 | Schmahl_pdgf_signaling     | LGG | 0.186378449  |
| UPP2 | Selenocompound metabol     | LGG | -0.079703853 |
| UPP2 | Signaling_by_hippo         | LGG | 0.153235698  |
| UPP2 | Sphingolipid metabolism    | LGG | -0.109525703 |
| UPP2 | Starch and sucrose metabo  | LGG | 0.092421169  |
| UPP2 | Steroid biosynthesis       | LGG | -0.233039747 |
| UPP2 | Steroid hormone biosynth   | LGG | 0.264179252  |
| UPP2 | Sulfur metabolism          | LGG | 0.053333031  |
| UPP2 | Synthesis and degradation  | LGG | 0.433864536  |
| UPP2 | T helper cell              | LGG | -0.072021828 |
| UPP2 | T helper1 (th1) cell       | LGG | -0.065321018 |
| UPP2 | T helper17 (th17) cell     | LGG | -0.079303384 |
| UPP2 | T helper2 (th2) cell       | LGG | -0.030081219 |
| UPP2 | T helper9 (th9) cell       | LGG | -0.091567426 |
| UPP2 | Taurine and hypotaurine r  | LGG | 0.076539535  |
| UPP2 | Terpenoid backbone biosy   | LGG | -0.01226199  |
| UPP2 | Tgf_beta_signaling_pathw   | LGG | 0.067271926  |
| UPP2 | Thiamine metabolism        | LGG | 0.225882696  |
| UPP2 | Tnfa_signaling_via_nfk     | LGG | -0.130084332 |
| UPP2 | Tryptophan metabolism      | LGG | 0.139016708  |
| UPP2 | Tumor endothelial cell     | LGG | 0.091593226  |
| UPP2 | Tyrosine metabolism        | LGG | 0.237802207  |
| UPP2 | Ubiquinone and other ter   | LGG | -0.288728978 |
| UPP2 | Valine, leucine and isoleu | LGG | -0.120792776 |
| UPP2 | Valine, leucine and isoleu | LGG | 0.356731913  |
| UPP2 | Vascular endothelial cell  | LGG | -0.269705254 |



|      |                            |      |              |
|------|----------------------------|------|--------------|
| UPP2 | Vascular smooth muscle c   | LGG  | 0.071407968  |
| UPP2 | Vegf_signaling_pathway     | LGG  | 0.274645488  |
| UPP2 | Vitamin b6 metabolism      | LGG  | 0.171727635  |
| UPP2 | Willert_wnt_signaling      | LGG  | 0.040727943  |
| UPP2 | Wnt_beta_catenin_signali   | LGG  | -0.230845627 |
| CDA  | Abnormal plasma cell       | LIHC | 0.007133724  |
| CDA  | Activated b cell           | LIHC | -0.023916478 |
| CDA  | Activated cd4+ t cell      | LIHC | 0.096719617  |
| CDA  | Activated t cell           | LIHC | -0.010498253 |
| CDA  | Alanine, aspartate and glu | LIHC | 0.150937646  |
| CDA  | Alcala_apoptosis           | LIHC | -0.082056449 |
| CDA  | Alpha-linolenic acid meta  | LIHC | 0.324882432  |
| CDA  | Amino sugar and nucleoti   | LIHC | 0.246976833  |
| CDA  | Ampk_pathway               | LIHC | 0.100481079  |
| CDA  | Angiogenesis               | LIHC | 0.177392922  |
| CDA  | Arachidonic acid metabo    | LIHC | 0.315723927  |
| CDA  | Arginine and proline met   | LIHC | 0.142299801  |
| CDA  | Arginine biosynthesis      | LIHC | 0.206871748  |
| CDA  | Ascorbate and aldarate m   | LIHC | 0.149169864  |
| CDA  | Atypical memory b cell     | LIHC | -0.073889819 |
| CDA  | Axl+siglec6+ dendritic ce  | LIHC | 0.256435139  |
| CDA  | B cell                     | LIHC | 0.092105297  |
| CDA  | B1 cell                    | LIHC | 0.016851788  |
| CDA  | Basal cell                 | LIHC | 0.174750378  |
| CDA  | Beta-alanine metabolism    | LIHC | 0.222770987  |
| CDA  | Biosynthesis of unsaturate | LIHC | 0.209170296  |
| CDA  | Biotin metabolism          | LIHC | 0.110044421  |
| CDA  | Butanoate metabolism       | LIHC | 0.187761061  |
| CDA  | Caffeine metabolism        | LIHC | 0.368840672  |
| CDA  | Cancer stem cell           | LIHC | 0.022234191  |
| CDA  | Cancer stem-like cell      | LIHC | -0.084484425 |
| CDA  | Cd4+ cytotoxic t cell      | LIHC | 0.082618175  |
| CDA  | Cd4+ memory t cell         | LIHC | 0.004268653  |
| CDA  | Cd4+ regulatory t cell     | LIHC | 0.166874571  |
| CDA  | Cd4+ t helper cell         | LIHC | 0.058018915  |
| CDA  | Cd4+cd25+ regulatory t c   | LIHC | 0.053867863  |
| CDA  | Cd8+ cytotoxic t cell      | LIHC | 0.032177164  |
| CDA  | Cd8+ regulatory t cell     | LIHC | -0.019710354 |
| CDA  | Cell_cycle                 | LIHC | -0.269067933 |
| CDA  | Chandran_metastasis_top    | LIHC | -0.359624656 |
| CDA  | Citrate cycle (tca cycle)  | LIHC | 0.11482456   |
| CDA  | Cysteine and methionine r  | LIHC | 0.225041664  |
| CDA  | Cytokine induced killer c  | LIHC | -0.032332156 |

|     |                              |      |              |
|-----|------------------------------|------|--------------|
| CDA | D-arginine and d-ornithin    | LIHC | 0.179115833  |
| CDA | D-glutamine and d-glutan     | LIHC | 0.184797427  |
| CDA | Dendritic cell               | LIHC | 0.121827945  |
| CDA | Dna_repair                   | LIHC | -0.16672988  |
| CDA | Dna_replication              | LIHC | -0.157706736 |
| CDA | Double-negative memory       | LIHC | -0.054654988 |
| CDA | Drug metabolism - cytoch     | LIHC | 0.174269062  |
| CDA | Drug metabolism - other      | LIHC | 0.222153159  |
| CDA | E2f_targets                  | LIHC | -0.197946469 |
| CDA | Ecm_receptor_interaction     | LIHC | 0.124552285  |
| CDA | Effector cd4+ memory t       | LIHC | 0.033348743  |
| CDA | Effector cd8+ memory t       | LIHC | 0.05611873   |
| CDA | Effector memory t cell       | LIHC | 0.028663867  |
| CDA | Effector regulatory t (treg  | LIHC | 0.08586618   |
| CDA | Elvidge_hif1a_targets_up     | LIHC | -0.018448278 |
| CDA | Endothelial cell             | LIHC | 0.095649971  |
| CDA | Eosinophil                   | LIHC | 0.175886149  |
| CDA | Ether lipid metabolism       | LIHC | 0.056289738  |
| CDA | Exhausted cd4+ t cell        | LIHC | 0.098830195  |
| CDA | Exhausted cd8+ t cell        | LIHC | 0.097515882  |
| CDA | Exhausted t cell             | LIHC | 0.009778451  |
| CDA | Fat cell (adipocyte)         | LIHC | 0.194910332  |
| CDA | Fatty acid biosynthesis      | LIHC | 0.144549978  |
| CDA | Fatty acid degradation       | LIHC | 0.189629385  |
| CDA | Fatty acid elongation        | LIHC | 0.191616691  |
| CDA | Fibroblast                   | LIHC | 0.113492815  |
| CDA | Folate biosynthesis          | LIHC | 0.340938288  |
| CDA | Follicular b cell            | LIHC | 0.029957733  |
| CDA | Follicular dendritic cell    | LIHC | -0.095484804 |
| CDA | Follicular helper (tfh) t ce | LIHC | 0.00897445   |
| CDA | Follicular t cell            | LIHC | -0.033693354 |
| CDA | Foxp3+il-17+ t cell          | LIHC | 0.09798393   |
| CDA | Fructose and mannose me      | LIHC | 0.218503252  |
| CDA | G2m_checkpoint               | LIHC | -0.225856029 |
| CDA | Galactose metabolism         | LIHC | 0.275372213  |
| CDA | Galie_tumor_stemness_ge      | LIHC | -0.096428888 |
| CDA | Glutathione metabolism       | LIHC | 0.216805769  |
| CDA | Glycerolipid metabolism      | LIHC | 0.403042957  |
| CDA | Glycerophospholipid met      | LIHC | 0.174621975  |
| CDA | Glycine, serine and threor   | LIHC | 0.219514379  |
| CDA | Glycolysis / gluconeogene    | LIHC | 0.229845482  |
| CDA | Glycosaminoglycan biosy      | LIHC | 0.152416471  |
| CDA | Glycosaminoglycan biosy      | LIHC | -0.268456814 |

|     |                           |      |              |
|-----|---------------------------|------|--------------|
| CDA | Glycosaminoglycan biosyn  | LIHC | 0.008710903  |
| CDA | Glycosaminoglycan degra   | LIHC | 0.064890832  |
| CDA | Glycosphingolipid biosyn  | LIHC | 0.087985653  |
| CDA | Glycosphingolipid biosyn  | LIHC | 0.206167947  |
| CDA | Glycosphingolipid biosyn  | LIHC | 0.179755849  |
| CDA | Glycosylphosphatidylinos  | LIHC | -0.102447341 |
| CDA | Glyoxylate and dicarboxy  | LIHC | 0.134793919  |
| CDA | Granulocyte               | LIHC | 0.148069375  |
| CDA | Hedgehog_signaling        | LIHC | -0.147386099 |
| CDA | Histidine metabolism      | LIHC | 0.243016711  |
| CDA | Hypoxia                   | LIHC | 0.30046283   |
| CDA | Il-17alpha t cell         | LIHC | 0.021676907  |
| CDA | Il2_stat5_signaling       | LIHC | 0.17522217   |
| CDA | Il6_jak_stat3_signaling   | LIHC | 0.231154876  |
| CDA | Immune_checkpoints_turr   | LIHC | 0.002480635  |
| CDA | Immune_inhibition_cytok   | LIHC | 0.279834103  |
| CDA | Inositol phosphate metabo | LIHC | -0.025842034 |
| CDA | Interleukin_6_signaling   | LIHC | 0.11180266   |
| CDA | Jaeger_metastasis_up      | LIHC | 0.098770284  |
| CDA | Jain_nfkb_signaling       | LIHC | -0.357537627 |
| CDA | Kras_signaling_up         | LIHC | 0.25580821   |
| CDA | Linoleic acid metabolism  | LIHC | 0.263104564  |
| CDA | Lipoic acid metabolism    | LIHC | -0.172672832 |
| CDA | Lysine degradation        | LIHC | 0.069300972  |
| CDA | Lysosome                  | LIHC | 0.140491975  |
| CDA | M1 macrophage             | LIHC | 0.183487561  |
| CDA | M2 macrophage             | LIHC | 0.227872612  |
| CDA | Mannose type o-glycan bi  | LIHC | 0.015509919  |
| CDA | Mapk_signaling_pathway    | LIHC | 0.053853133  |
| CDA | Mapk3_erk1_activation     | LIHC | 0.111595332  |
| CDA | Marginal zone b cell      | LIHC | 0.194126572  |
| CDA | Memory b cell             | LIHC | -0.033842215 |
| CDA | Mesenchymal cell          | LIHC | 0.032843717  |
| CDA | Mesenchymal stem cell     | LIHC | 0.209845228  |
| CDA | Metabolism of xenobiotic  | LIHC | 0.22301582   |
| CDA | Migrating cancer stem cel | LIHC | -0.027983752 |
| CDA | Mitotic_spindle           | LIHC | -0.203604187 |
| CDA | Monocyte                  | LIHC | 0.195675662  |
| CDA | Mtor_signaling_pathway    | LIHC | 0.085364826  |
| CDA | Mtorc1_signaling          | LIHC | 0.049769991  |
| CDA | Mucin type o-glycan biosy | LIHC | 0.02519881   |
| CDA | Myc_targets_v1            | LIHC | -0.292641296 |
| CDA | Myeloid cell              | LIHC | 0.130035031  |

|     |                             |      |              |
|-----|-----------------------------|------|--------------|
| CDA | N-glycan biosynthesis       | LIHC | 0.109315091  |
| CDA | Naive b cell                | LIHC | 0.027994932  |
| CDA | Naive cd4+ t cell           | LIHC | -0.129930422 |
| CDA | Naive cd8+ t cell           | LIHC | -0.249322708 |
| CDA | Natural killer cell         | LIHC | 0.04374618   |
| CDA | Natural killer t (nkt) cell | LIHC | -0.116553901 |
| CDA | Natural regulatory t (treg) | LIHC | 0.128586382  |
| CDA | Neomycin, kanamycin and     | LIHC | 0.363879752  |
| CDA | Neutrophil                  | LIHC | 0.337632155  |
| CDA | Nicotinate and nicotinami   | LIHC | 0.354066638  |
| CDA | Nitrogen metabolism         | LIHC | 0.004399497  |
| CDA | Nod_like_receptor_signal    | LIHC | 0.082657913  |
| CDA | Notch_signaling             | LIHC | 0.146518742  |
| CDA | One carbon pool by folate   | LIHC | 0.116034747  |
| CDA | Other glycan degradation    | LIHC | 0.083680289  |
| CDA | Other types of o-glycan b   | LIHC | -0.013222343 |
| CDA | Oxidative phosphorylatio    | LIHC | 0.134319983  |
| CDA | P53_pathway                 | LIHC | 0.262414608  |
| CDA | P53_signaling_pathway       | LIHC | 0.049471375  |
| CDA | Pantothenate and coa bios   | LIHC | 0.285150113  |
| CDA | Pentose and glucuronate i   | LIHC | 0.224393066  |
| CDA | Pentose phosphate pathwa    | LIHC | 0.137787535  |
| CDA | Pericyte                    | LIHC | 0.052216677  |
| CDA | Phenylalanine metabolism    | LIHC | 0.148930276  |
| CDA | Phenylalanine, tyrosine ar  | LIHC | 0.266446616  |
| CDA | Phosphonate and phosphir    | LIHC | 0.05418152   |
| CDA | Pi3k_akt_activation         | LIHC | -0.012988078 |
| CDA | Pi3k_akt_mtor_signaling     | LIHC | 0.090138868  |
| CDA | Porphyrin and chlorophyl    | LIHC | 0.107188871  |
| CDA | Primary bile acid biosynt   | LIHC | 0.158630228  |
| CDA | Propanoate metabolism       | LIHC | 0.205319327  |
| CDA | Purine metabolism           | LIHC | -0.057192166 |
| CDA | Pyrimidine metabolism       | LIHC | -0.147226923 |
| CDA | Pyruvate metabolism         | LIHC | 0.262654398  |
| CDA | Regulation_of_autophagy     | LIHC | 0.132826394  |
| CDA | Retinol metabolism          | LIHC | 0.237903608  |
| CDA | Riboflavin metabolism       | LIHC | 0.188468102  |
| CDA | Schmahl_pdgf_signaling      | LIHC | 0.21625035   |
| CDA | Selenocompound metabol      | LIHC | 0.064151916  |
| CDA | Signaling_by_hippo          | LIHC | -0.197293678 |
| CDA | Sphingolipid metabolism     | LIHC | -0.011084494 |
| CDA | Starch and sucrose metabo   | LIHC | 0.381513512  |
| CDA | Steroid biosynthesis        | LIHC | -0.040074828 |

|      |                            |      |              |
|------|----------------------------|------|--------------|
| CDA  | Steroid hormone biosynth   | LIHC | 0.210311129  |
| CDA  | Sulfur metabolism          | LIHC | 0.090901718  |
| CDA  | Synthesis and degradation  | LIHC | 0.210685369  |
| CDA  | T helper cell              | LIHC | 0.038861375  |
| CDA  | T helper1 (th1) cell       | LIHC | 0.058968905  |
| CDA  | T helper17 (th17) cell     | LIHC | 0.041013436  |
| CDA  | T helper2 (th2) cell       | LIHC | 0.058565807  |
| CDA  | T helper9 (th9) cell       | LIHC | 0.07178423   |
| CDA  | Taurine and hypotaurine r  | LIHC | 0.045119561  |
| CDA  | Terpenoid backbone biosy   | LIHC | 0.073650998  |
| CDA  | Tgf_beta_signaling_pathw   | LIHC | -0.100882588 |
| CDA  | Thiamine metabolism        | LIHC | 0.44765811   |
| CDA  | Tnfa_signaling_via_nfk     | LIHC | 0.231209432  |
| CDA  | Tryptophan metabolism      | LIHC | 0.260641164  |
| CDA  | Tumor endothelial cell     | LIHC | -0.005565449 |
| CDA  | Tyrosine metabolism        | LIHC | 0.148625025  |
| CDA  | Ubiquinone and other ter   | LIHC | 0.255528173  |
| CDA  | Valine, leucine and isoleu | LIHC | 0.497297091  |
| CDA  | Valine, leucine and isoleu | LIHC | 0.181104881  |
| CDA  | Vascular endothelial cell  | LIHC | 0.228823346  |
| CDA  | Vascular smooth muscle c   | LIHC | 0.139280472  |
| CDA  | Vegf_signaling_pathway     | LIHC | 0.051209829  |
| CDA  | Vitamin b6 metabolism      | LIHC | 0.145289406  |
| CDA  | Willert_wnt_signaling      | LIHC | 0.066256959  |
| CDA  | Wnt_beta_catenin_signali   | LIHC | -0.460788692 |
| UCK1 | Abnormal plasma cell       | LIHC | -0.146788485 |
| UCK1 | Activated b cell           | LIHC | 0.003795513  |
| UCK1 | Activated cd4+ t cell      | LIHC | -0.082768344 |
| UCK1 | Activated t cell           | LIHC | 0.032316536  |
| UCK1 | Alanine, aspartate and glu | LIHC | -0.182795116 |
| UCK1 | Alcala_apoptosis           | LIHC | 0.089633203  |
| UCK1 | Alpha-linolenic acid meta  | LIHC | 0.106046368  |
| UCK1 | Amino sugar and nucleoti   | LIHC | -0.032272365 |
| UCK1 | Ampk_pathway               | LIHC | 0.055855543  |
| UCK1 | Angiogenesis               | LIHC | -0.172600301 |
| UCK1 | Arachidonic acid metabol   | LIHC | 0.012179166  |
| UCK1 | Arginine and proline met   | LIHC | -0.106470809 |
| UCK1 | Arginine biosynthesis      | LIHC | -0.092087065 |
| UCK1 | Ascorbate and aldarate m   | LIHC | -0.156015007 |
| UCK1 | Atypical memory b cell     | LIHC | -0.025119119 |
| UCK1 | Axl+siglec6+ dendritic ce  | LIHC | -0.098809229 |
| UCK1 | B cell                     | LIHC | -0.10801338  |
| UCK1 | B1 cell                    | LIHC | 0.018495601  |

|      |                             |      |              |
|------|-----------------------------|------|--------------|
| UCK1 | Basal cell                  | LIHC | 0.007373677  |
| UCK1 | Beta-alanine metabolism     | LIHC | -0.118670471 |
| UCK1 | Biosynthesis of unsaturate  | LIHC | 0.060918126  |
| UCK1 | Biotin metabolism           | LIHC | -0.013997895 |
| UCK1 | Butanoate metabolism        | LIHC | 0.075643876  |
| UCK1 | Caffeine metabolism         | LIHC | -0.199676063 |
| UCK1 | Cancer stem cell            | LIHC | -0.258823314 |
| UCK1 | Cancer stem-like cell       | LIHC | -0.244200874 |
| UCK1 | Cd4+ cytotoxic t cell       | LIHC | -0.032869998 |
| UCK1 | Cd4+ memory t cell          | LIHC | -0.00817982  |
| UCK1 | Cd4+ regulatory t cell      | LIHC | -0.03771094  |
| UCK1 | Cd4+ t helper cell          | LIHC | -0.003568324 |
| UCK1 | Cd4+cd25+ regulatory t c    | LIHC | -0.008771457 |
| UCK1 | Cd8+ cytotoxic t cell       | LIHC | 0.085355937  |
| UCK1 | Cd8+ regulatory t cell      | LIHC | 0.029633447  |
| UCK1 | Cell_cycle                  | LIHC | 0.068482862  |
| UCK1 | Chandran_metastasis_top5    | LIHC | -0.184235035 |
| UCK1 | Citrate cycle (tca cycle)   | LIHC | -0.136627039 |
| UCK1 | Cysteine and methionine r   | LIHC | -0.180140395 |
| UCK1 | Cytokine induced killer c   | LIHC | 0.068535605  |
| UCK1 | D-arginine and d-ornithin   | LIHC | 0.010695557  |
| UCK1 | D-glutamine and d-glutan    | LIHC | -0.161253186 |
| UCK1 | Dendritic cell              | LIHC | -0.141468371 |
| UCK1 | Dna_repair                  | LIHC | 0.336278003  |
| UCK1 | Dna_replication             | LIHC | 0.2267865    |
| UCK1 | Double-negative memory      | LIHC | 0.126146009  |
| UCK1 | Drug metabolism - cytoch    | LIHC | -0.084014477 |
| UCK1 | Drug metabolism - other     | LIHC | 0.087245013  |
| UCK1 | E2f_targets                 | LIHC | 0.104413221  |
| UCK1 | Ecm_receptor_interaction    | LIHC | -0.298930656 |
| UCK1 | Effector cd4+ memory t (    | LIHC | -0.156909884 |
| UCK1 | Effector cd8+ memory t (    | LIHC | -0.158464322 |
| UCK1 | Effector memory t cell      | LIHC | -0.104736649 |
| UCK1 | Effector regulatory t (treg | LIHC | -0.13776247  |
| UCK1 | Elvidge_hif1a_targets_up    | LIHC | -0.194267205 |
| UCK1 | Endothelial cell            | LIHC | -0.238117987 |
| UCK1 | Eosinophil                  | LIHC | -0.094671465 |
| UCK1 | Ether lipid metabolism      | LIHC | -0.02751041  |
| UCK1 | Exhausted cd4+ t cell       | LIHC | -0.14542755  |
| UCK1 | Exhausted cd8+ t cell       | LIHC | -0.126064688 |
| UCK1 | Exhausted t cell            | LIHC | 0.112826038  |
| UCK1 | Fat cell (adipocyte)        | LIHC | 0.109036945  |
| UCK1 | Fatty acid biosynthesis     | LIHC | 0.036734998  |

|      |                              |      |              |
|------|------------------------------|------|--------------|
| UCK1 | Fatty acid degradation       | LIHC | -0.004771028 |
| UCK1 | Fatty acid elongation        | LIHC | 0.1511439    |
| UCK1 | Fibroblast                   | LIHC | -0.27732547  |
| UCK1 | Folate biosynthesis          | LIHC | -0.036703863 |
| UCK1 | Follicular b cell            | LIHC | -0.088458198 |
| UCK1 | Follicular dendritic cell    | LIHC | -0.024158401 |
| UCK1 | Follicular helper (tfh) t ce | LIHC | -0.043307708 |
| UCK1 | Follicular t cell            | LIHC | 0.196334559  |
| UCK1 | Foxp3+il-17+ t cell          | LIHC | 0.039179104  |
| UCK1 | Fructose and mannose me      | LIHC | 0.03989832   |
| UCK1 | G2m_checkpoint               | LIHC | 0.040720878  |
| UCK1 | Galactose metabolism         | LIHC | -0.030427027 |
| UCK1 | Galie_tumor_stemness_ge      | LIHC | -0.198267523 |
| UCK1 | Glutathione metabolism       | LIHC | 0.024866021  |
| UCK1 | Glycerolipid metabolism      | LIHC | 0.04742331   |
| UCK1 | Glycerophospholipid metæ     | LIHC | 0.188437783  |
| UCK1 | Glycine, serine and threor   | LIHC | 0.008448148  |
| UCK1 | Glycolysis / gluconeogene    | LIHC | -0.034618774 |
| UCK1 | Glycosaminoglycan biosy      | LIHC | -0.016454887 |
| UCK1 | Glycosaminoglycan biosy      | LIHC | 0.066456202  |
| UCK1 | Glycosaminoglycan biosy      | LIHC | 0.030085867  |
| UCK1 | Glycosaminoglycan degra      | LIHC | -0.209611145 |
| UCK1 | Glycosphingolipid biosyn     | LIHC | -0.037059396 |
| UCK1 | Glycosphingolipid biosyn     | LIHC | 0.005625873  |
| UCK1 | Glycosphingolipid biosyn     | LIHC | 0.053982291  |
| UCK1 | Glycosylphosphatidylinos     | LIHC | 0.059456918  |
| UCK1 | Glyoxylate and dicarboxy     | LIHC | -0.072997646 |
| UCK1 | Granulocyte                  | LIHC | -0.160503951 |
| UCK1 | Hedgehog_signaling           | LIHC | -0.361828974 |
| UCK1 | Histidine metabolism         | LIHC | -0.104507234 |
| UCK1 | Hypoxia                      | LIHC | -0.205179173 |
| UCK1 | Il-17ralpha t cell           | LIHC | 0.053201942  |
| UCK1 | Il2_stat5_signaling          | LIHC | -0.162519021 |
| UCK1 | Il6_jak_stat3_signaling      | LIHC | -0.223345509 |
| UCK1 | Immune_checkpoints_tur       | LIHC | -0.097316862 |
| UCK1 | Immune_inhibition_cytok      | LIHC | 0.021743109  |
| UCK1 | Inositol phosphate metabo    | LIHC | -0.180386541 |
| UCK1 | Interleukin_6_signaling      | LIHC | -0.400773004 |
| UCK1 | Jaeger_metastasis_up         | LIHC | -0.102093804 |
| UCK1 | Jain_nfkb_signaling          | LIHC | -0.063109623 |
| UCK1 | Kras_signaling_up            | LIHC | -0.261201434 |
| UCK1 | Linoleic acid metabolism     | LIHC | -0.029125858 |
| UCK1 | Lipoic acid metabolism       | LIHC | 0.080331078  |

|      |                             |      |              |
|------|-----------------------------|------|--------------|
| UCK1 | Lysine degradation          | LIHC | -0.017221505 |
| UCK1 | Lysosome                    | LIHC | -0.083964099 |
| UCK1 | M1 macrophage               | LIHC | -0.16512845  |
| UCK1 | M2 macrophage               | LIHC | -0.131380087 |
| UCK1 | Mannose type o-glycan bi    | LIHC | 0.288155371  |
| UCK1 | Mapk_signaling_pathway      | LIHC | -0.310391483 |
| UCK1 | Mapk3_erk1_activation       | LIHC | -0.414226128 |
| UCK1 | Marginal zone b cell        | LIHC | -0.131706794 |
| UCK1 | Memory b cell               | LIHC | -0.07231265  |
| UCK1 | Mesenchymal cell            | LIHC | -0.118145094 |
| UCK1 | Mesenchymal stem cell       | LIHC | -0.301822862 |
| UCK1 | Metabolism of xenobiotic    | LIHC | -0.062951953 |
| UCK1 | Migrating cancer stem cel   | LIHC | -0.093737093 |
| UCK1 | Mitotic_spindle             | LIHC | -0.237797713 |
| UCK1 | Monocyte                    | LIHC | -0.109268045 |
| UCK1 | Mtor_signaling_pathway      | LIHC | -0.079801905 |
| UCK1 | Mtorc1_signaling            | LIHC | -0.030761535 |
| UCK1 | Mucin type o-glycan bios    | LIHC | -0.276285418 |
| UCK1 | Myc_targets_v1              | LIHC | 0.193996881  |
| UCK1 | Myeloid cell                | LIHC | -0.165706408 |
| UCK1 | N-glycan biosynthesis       | LIHC | -0.047268081 |
| UCK1 | Naive b cell                | LIHC | 0.002607528  |
| UCK1 | Naive cd4+ t cell           | LIHC | -0.293913405 |
| UCK1 | Naive cd8+ t cell           | LIHC | -0.237348954 |
| UCK1 | Natural killer cell         | LIHC | -0.008192117 |
| UCK1 | Natural killer t (nkt) cell | LIHC | -0.066431264 |
| UCK1 | Natural regulatory t (treg) | LIHC | -0.087497035 |
| UCK1 | Neomycin, kanamycin an      | LIHC | 0.021583385  |
| UCK1 | Neutrophil                  | LIHC | -0.132202823 |
| UCK1 | Nicotinate and nicotinami   | LIHC | -0.088672009 |
| UCK1 | Nitrogen metabolism         | LIHC | -0.023099873 |
| UCK1 | Nod_like_receptor_signal    | LIHC | -0.230022285 |
| UCK1 | Notch_signaling             | LIHC | -0.101838006 |
| UCK1 | One carbon pool by folate   | LIHC | -0.099567959 |
| UCK1 | Other glycan degradation    | LIHC | -0.101308912 |
| UCK1 | Other types of o-glycan b   | LIHC | 0.235147559  |
| UCK1 | Oxidative phosphorylatio    | LIHC | 0.227317461  |
| UCK1 | P53_pathway                 | LIHC | 0.026861951  |
| UCK1 | P53_signaling_pathway       | LIHC | -0.136788191 |
| UCK1 | Pantothenate and coa bios   | LIHC | 0.083549908  |
| UCK1 | Pentose and glucuronate i   | LIHC | -0.171182692 |
| UCK1 | Pentose phosphate pathwa    | LIHC | 0.048153058  |
| UCK1 | Pericyte                    | LIHC | -0.236901222 |



|      |                            |      |              |
|------|----------------------------|------|--------------|
| UCK1 | Phenylalanine metabolism   | LIHC | -0.10258016  |
| UCK1 | Phenylalanine, tyrosine ar | LIHC | 0.020355171  |
| UCK1 | Phosphonate and phosphir   | LIHC | -0.153829263 |
| UCK1 | Pi3k_akt_activation        | LIHC | -0.251472546 |
| UCK1 | Pi3k_akt_mtor_signaling    | LIHC | -0.052210746 |
| UCK1 | Porphyrin and chlorophyl   | LIHC | -0.024365104 |
| UCK1 | Primary bile acid biosynt# | LIHC | -0.07242157  |
| UCK1 | Propanoate metabolism      | LIHC | -0.083143017 |
| UCK1 | Purine metabolism          | LIHC | 0.173374308  |
| UCK1 | Pyrimidine metabolism      | LIHC | 0.244600594  |
| UCK1 | Pyruvate metabolism        | LIHC | 0.027173644  |
| UCK1 | Regulation_of_autophagy    | LIHC | -0.092107934 |
| UCK1 | Retinol metabolism         | LIHC | -0.046310498 |
| UCK1 | Riboflavin metabolism      | LIHC | 0.185683961  |
| UCK1 | Schmahl_pdgf_signaling     | LIHC | -0.181991715 |
| UCK1 | Selenocompound metabol     | LIHC | -0.20821473  |
| UCK1 | Signaling_by_hippo         | LIHC | -0.26535552  |
| UCK1 | Sphingolipid metabolism    | LIHC | -0.226404209 |
| UCK1 | Starch and sucrose metabo  | LIHC | 0.006009826  |
| UCK1 | Steroid biosynthesis       | LIHC | 0.25013962   |
| UCK1 | Steroid hormone biosynth   | LIHC | -0.104130587 |
| UCK1 | Sulfur metabolism          | LIHC | -0.190245316 |
| UCK1 | Synthesis and degradation  | LIHC | 0.149554776  |
| UCK1 | T helper cell              | LIHC | -0.059159973 |
| UCK1 | T helper1 (th1) cell       | LIHC | 0.009164751  |
| UCK1 | T helper17 (th17) cell     | LIHC | -0.094254063 |
| UCK1 | T helper2 (th2) cell       | LIHC | -0.037767767 |
| UCK1 | T helper9 (th9) cell       | LIHC | 0.035722501  |
| UCK1 | Taurine and hypotaurine r  | LIHC | 0.0191887    |
| UCK1 | Terpenoid backbone biosy   | LIHC | 0.199643953  |
| UCK1 | Tgf_beta_signaling_pathw   | LIHC | -0.318566463 |
| UCK1 | Thiamine metabolism        | LIHC | 0.086142178  |
| UCK1 | Tnfa_signaling_via_nfkb    | LIHC | -0.255824275 |
| UCK1 | Tryptophan metabolism      | LIHC | -0.037704435 |
| UCK1 | Tumor endothelial cell     | LIHC | -0.062549759 |
| UCK1 | Tyrosine metabolism        | LIHC | -0.029793224 |
| UCK1 | Ubiquinone and other ter#  | LIHC | -0.056770917 |
| UCK1 | Valine, leucine and isoleu | LIHC | -0.01711382  |
| UCK1 | Valine, leucine and isoleu | LIHC | -0.034005337 |
| UCK1 | Vascular endothelial cell  | LIHC | -0.189343656 |
| UCK1 | Vascular smooth muscle c   | LIHC | -0.179060009 |
| UCK1 | Vegf_signaling_pathway     | LIHC | -0.023818902 |
| UCK1 | Vitamin b6 metabolism      | LIHC | 0.136896763  |

|      |                            |      |              |
|------|----------------------------|------|--------------|
| UCK1 | Willert_wnt_signaling      | LIHC | -0.100787951 |
| UCK1 | Wnt_beta_catenin_signali   | LIHC | -0.072107321 |
| UCK2 | Abnormal plasma cell       | LIHC | 0.069338457  |
| UCK2 | Activated b cell           | LIHC | 0.041997353  |
| UCK2 | Activated cd4+ t cell      | LIHC | -0.040070902 |
| UCK2 | Activated t cell           | LIHC | 0.058220651  |
| UCK2 | Alanine, aspartate and glu | LIHC | -0.106884888 |
| UCK2 | Alcala_apoptosis           | LIHC | 0.404619923  |
| UCK2 | Alpha-linolenic acid meta  | LIHC | -0.227974913 |
| UCK2 | Amino sugar and nucleoti   | LIHC | 0.110036479  |
| UCK2 | Ampk_pathway               | LIHC | 0.161636589  |
| UCK2 | Angiogenesis               | LIHC | -0.142587415 |
| UCK2 | Arachidonic acid metabol   | LIHC | -0.123245896 |
| UCK2 | Arginine and proline metæ  | LIHC | -0.173169531 |
| UCK2 | Arginine biosynthesis      | LIHC | -0.248284188 |
| UCK2 | Ascorbate and aldarate me  | LIHC | -0.040031673 |
| UCK2 | Atypical memory b cell     | LIHC | -0.104725855 |
| UCK2 | Axl+siglec6+ dendritic ce  | LIHC | -0.246883916 |
| UCK2 | B cell                     | LIHC | 0.009160395  |
| UCK2 | B1 cell                    | LIHC | -0.053348048 |
| UCK2 | Basal cell                 | LIHC | 0.191352537  |
| UCK2 | Beta-alanine metabolism    | LIHC | -0.304894548 |
| UCK2 | Biosynthesis of unsaturate | LIHC | -0.172398338 |
| UCK2 | Biotin metabolism          | LIHC | -0.269562409 |
| UCK2 | Butanoate metabolism       | LIHC | -0.265571661 |
| UCK2 | Caffeine metabolism        | LIHC | -0.266424381 |
| UCK2 | Cancer stem cell           | LIHC | -0.00917308  |
| UCK2 | Cancer stem-like cell      | LIHC | 0.022894723  |
| UCK2 | Cd4+ cytotoxic t cell      | LIHC | -0.073217077 |
| UCK2 | Cd4+ memory t cell         | LIHC | -0.098703813 |
| UCK2 | Cd4+ regulatory t cell     | LIHC | -0.145384239 |
| UCK2 | Cd4+ t helper cell         | LIHC | -0.052478947 |
| UCK2 | Cd4+cd25+ regulatory t c   | LIHC | -0.033637618 |
| UCK2 | Cd8+ cytotoxic t cell      | LIHC | -0.016059548 |
| UCK2 | Cd8+ regulatory t cell     | LIHC | -0.035254193 |
| UCK2 | Cell_cycle                 | LIHC | 0.546731869  |
| UCK2 | Chandran_metastasis_topç   | LIHC | 0.333441514  |
| UCK2 | Citrate cycle (tca cycle)  | LIHC | -0.213440158 |
| UCK2 | Cysteine and methionine r  | LIHC | 0.084972233  |
| UCK2 | Cytokine induced killer ç  | LIHC | 0.050764844  |
| UCK2 | D-arginine and d-ornithin  | LIHC | -0.097844587 |
| UCK2 | D-glutamine and d-glutan   | LIHC | -0.172536131 |
| UCK2 | Dendritic cell             | LIHC | -0.086651041 |

|      |                              |      |              |
|------|------------------------------|------|--------------|
| UCK2 | Dna_repair                   | LIHC | 0.436929729  |
| UCK2 | Dna_replication              | LIHC | 0.526138687  |
| UCK2 | Double-negative memory       | LIHC | 0.060520138  |
| UCK2 | Drug metabolism - cytoch     | LIHC | -0.212864165 |
| UCK2 | Drug metabolism - other      | LIHC | 0.049376976  |
| UCK2 | E2f_targets                  | LIHC | 0.556582678  |
| UCK2 | Ecm_receptor_interaction     | LIHC | -0.240699778 |
| UCK2 | Effector cd4+ memory t       | LIHC | -0.153639083 |
| UCK2 | Effector cd8+ memory t       | LIHC | -0.021018105 |
| UCK2 | Effector memory t cell       | LIHC | -0.106388362 |
| UCK2 | Effector regulatory t (treg  | LIHC | -0.08670067  |
| UCK2 | Elvidge_hif1a_targets_up     | LIHC | 0.322743273  |
| UCK2 | Endothelial cell             | LIHC | -0.147626401 |
| UCK2 | Eosinophil                   | LIHC | 0.045831633  |
| UCK2 | Ether lipid metabolism       | LIHC | 0.040089839  |
| UCK2 | Exhausted cd4+ t cell        | LIHC | 0.046401776  |
| UCK2 | Exhausted cd8+ t cell        | LIHC | -0.005107959 |
| UCK2 | Exhausted t cell             | LIHC | 0.024890364  |
| UCK2 | Fat cell (adipocyte)         | LIHC | -0.373613052 |
| UCK2 | Fatty acid biosynthesis      | LIHC | -0.04209465  |
| UCK2 | Fatty acid degradation       | LIHC | -0.311436466 |
| UCK2 | Fatty acid elongation        | LIHC | -0.023254447 |
| UCK2 | Fibroblast                   | LIHC | -0.239956438 |
| UCK2 | Folate biosynthesis          | LIHC | -0.163718297 |
| UCK2 | Follicular b cell            | LIHC | -0.063267492 |
| UCK2 | Follicular dendritic cell    | LIHC | -0.064900623 |
| UCK2 | Follicular helper (tfh) t ce | LIHC | -0.088738867 |
| UCK2 | Follicular t cell            | LIHC | 0.13453027   |
| UCK2 | Foxp3+il-17+ t cell          | LIHC | -0.195798537 |
| UCK2 | Fructose and mannose me      | LIHC | 0.15949526   |
| UCK2 | G2m_checkpoint               | LIHC | 0.531034126  |
| UCK2 | Galactose metabolism         | LIHC | 0.010669535  |
| UCK2 | Galie_tumor_stemness_ge      | LIHC | -0.28644582  |
| UCK2 | Glutathione metabolism       | LIHC | 0.034804504  |
| UCK2 | Glycerolipid metabolism      | LIHC | -0.178755218 |
| UCK2 | Glycerophospholipid met&     | LIHC | -0.03720661  |
| UCK2 | Glycine, serine and threor   | LIHC | -0.217489444 |
| UCK2 | Glycolysis / gluconeogene    | LIHC | -0.109071555 |
| UCK2 | Glycosaminoglycan biosy      | LIHC | -0.123895029 |
| UCK2 | Glycosaminoglycan biosy      | LIHC | -0.165358071 |
| UCK2 | Glycosaminoglycan biosy      | LIHC | 0.118288393  |
| UCK2 | Glycosaminoglycan degra      | LIHC | -0.151404232 |
| UCK2 | Glycosphingolipid biosyn     | LIHC | -0.054389128 |

|      |                           |      |              |
|------|---------------------------|------|--------------|
| UCK2 | Glycosphingolipid biosyn  | LIHC | 0.085605945  |
| UCK2 | Glycosphingolipid biosyn  | LIHC | 0.107123159  |
| UCK2 | Glycosylphosphatidylinos  | LIHC | 0.107764381  |
| UCK2 | Glyoxylate and dicarboxy  | LIHC | -0.160321981 |
| UCK2 | Granulocyte               | LIHC | 0.015514903  |
| UCK2 | Hedgehog_signaling        | LIHC | -0.187625747 |
| UCK2 | Histidine metabolism      | LIHC | -0.361371606 |
| UCK2 | Hypoxia                   | LIHC | -0.0917527   |
| UCK2 | Il-17alpha t cell         | LIHC | -0.018356286 |
| UCK2 | Il2_stat5_signaling       | LIHC | -0.07293958  |
| UCK2 | Il6_jak_stat3_signaling   | LIHC | -0.134992407 |
| UCK2 | Immune_checkpoints_tur    | LIHC | -0.016197042 |
| UCK2 | Immune_inhibition_cytok   | LIHC | -0.092088603 |
| UCK2 | Inositol phosphate metabo | LIHC | -0.22326642  |
| UCK2 | Interleukin_6_signaling   | LIHC | -0.292707125 |
| UCK2 | Jaeger_metastasis_up      | LIHC | 0.41848123   |
| UCK2 | Jain_nfkb_signaling       | LIHC | 0.444810937  |
| UCK2 | Kras_signaling_up         | LIHC | -0.246259416 |
| UCK2 | Linoleic acid metabolism  | LIHC | -0.206057563 |
| UCK2 | Lipoic acid metabolism    | LIHC | -0.007517298 |
| UCK2 | Lysine degradation        | LIHC | -0.262818856 |
| UCK2 | Lysosome                  | LIHC | -0.120624873 |
| UCK2 | M1 macrophage             | LIHC | -0.091940437 |
| UCK2 | M2 macrophage             | LIHC | -0.167824    |
| UCK2 | Mannose type o-glycan bi  | LIHC | 0.135949264  |
| UCK2 | Mapk_signaling_pathway    | LIHC | -0.287002669 |
| UCK2 | Mapk3_erk1_activation     | LIHC | -0.260687286 |
| UCK2 | Marginal zone b cell      | LIHC | -0.192008472 |
| UCK2 | Memory b cell             | LIHC | 0.073369152  |
| UCK2 | Mesenchymal cell          | LIHC | -0.026764667 |
| UCK2 | Mesenchymal stem cell     | LIHC | -0.165062058 |
| UCK2 | Metabolism of xenobiotic  | LIHC | -0.207489414 |
| UCK2 | Migrating cancer stem cel | LIHC | 0.138129591  |
| UCK2 | Mitotic_spindle           | LIHC | 0.167937589  |
| UCK2 | Monocyte                  | LIHC | 0.02321921   |
| UCK2 | Mtor_signaling_pathway    | LIHC | -0.168131113 |
| UCK2 | Mtorc1_signaling          | LIHC | 0.468977484  |
| UCK2 | Mucin type o-glycan bios  | LIHC | -0.20914977  |
| UCK2 | Myc_targets_v1            | LIHC | 0.644541396  |
| UCK2 | Myeloid cell              | LIHC | -0.117345636 |
| UCK2 | N-glycan biosynthesis     | LIHC | -0.058776664 |
| UCK2 | Naive b cell              | LIHC | 0.19988873   |
| UCK2 | Naive cd4+ t cell         | LIHC | -0.19865262  |

|      |                             |      |              |
|------|-----------------------------|------|--------------|
| UCK2 | Naive cd8+ t cell           | LIHC | -0.158421851 |
| UCK2 | Natural killer cell         | LIHC | -0.07940243  |
| UCK2 | Natural killer t (nkt) cell | LIHC | 0.307493744  |
| UCK2 | Natural regulatory t (treg) | LIHC | -0.131962501 |
| UCK2 | Neomycin, kanamycin and     | LIHC | -0.065000636 |
| UCK2 | Neutrophil                  | LIHC | 0.073864967  |
| UCK2 | Nicotinate and nicotinami   | LIHC | -0.20894933  |
| UCK2 | Nitrogen metabolism         | LIHC | -0.23026946  |
| UCK2 | Nod_like_receptor_signal    | LIHC | -0.031793808 |
| UCK2 | Notch_signaling             | LIHC | -0.115064478 |
| UCK2 | One carbon pool by folate   | LIHC | -0.002920347 |
| UCK2 | Other glycan degradation    | LIHC | -0.213169429 |
| UCK2 | Other types of o-glycan b   | LIHC | 0.022010147  |
| UCK2 | Oxidative phosphorylatio    | LIHC | 0.043717319  |
| UCK2 | P53_pathway                 | LIHC | -0.031409064 |
| UCK2 | P53_signaling_pathway       | LIHC | 0.160028008  |
| UCK2 | Pantothenate and coa bios   | LIHC | -0.004929106 |
| UCK2 | Pentose and glucuronate i   | LIHC | -0.027637934 |
| UCK2 | Pentose phosphate pathwa    | LIHC | 0.272812831  |
| UCK2 | Pericyte                    | LIHC | -0.222043403 |
| UCK2 | Phenylalanine metabolism    | LIHC | -0.206006375 |
| UCK2 | Phenylalanine, tyrosine ar  | LIHC | -0.153275717 |
| UCK2 | Phosphonate and phosphir    | LIHC | -0.247820778 |
| UCK2 | Pi3k_akt_activation         | LIHC | -0.283152812 |
| UCK2 | Pi3k_akt_mtor_signaling     | LIHC | 0.12011244   |
| UCK2 | Porphyrin and chlorophyl    | LIHC | -0.029197472 |
| UCK2 | Primary bile acid biosynt   | LIHC | -0.294166915 |
| UCK2 | Propanoate metabolism       | LIHC | -0.307554414 |
| UCK2 | Purine metabolism           | LIHC | 0.416247166  |
| UCK2 | Pyrimidine metabolism       | LIHC | 0.564037231  |
| UCK2 | Pyruvate metabolism         | LIHC | -0.135915268 |
| UCK2 | Regulation_of_autophagy     | LIHC | -0.182002321 |
| UCK2 | Retinol metabolism          | LIHC | -0.13949403  |
| UCK2 | Riboflavin metabolism       | LIHC | 0.008772143  |
| UCK2 | Schmahl_pdgf_signaling      | LIHC | -0.374552615 |
| UCK2 | Selenocompound metabol      | LIHC | 0.014278171  |
| UCK2 | Signaling_by_hippo          | LIHC | -0.163023791 |
| UCK2 | Sphingolipid metabolism     | LIHC | -0.085088405 |
| UCK2 | Starch and sucrose metabo   | LIHC | -0.254103772 |
| UCK2 | Steroid biosynthesis        | LIHC | 0.140496012  |
| UCK2 | Steroid hormone biosynth    | LIHC | -0.145952808 |
| UCK2 | Sulfur metabolism           | LIHC | -0.141971812 |
| UCK2 | Synthesis and degradation   | LIHC | -0.262818952 |

|       |                            |      |              |
|-------|----------------------------|------|--------------|
| UCK2  | T helper cell              | LIHC | -0.136049407 |
| UCK2  | T helper1 (th1) cell       | LIHC | -0.068022512 |
| UCK2  | T helper17 (th17) cell     | LIHC | -0.009209076 |
| UCK2  | T helper2 (th2) cell       | LIHC | -0.054566836 |
| UCK2  | T helper9 (th9) cell       | LIHC | -0.049797339 |
| UCK2  | Taurine and hypotaurine r  | LIHC | -0.160312141 |
| UCK2  | Terpenoid backbone biosy   | LIHC | 0.085312781  |
| UCK2  | Tgf_beta_signaling_pathw   | LIHC | -0.177463322 |
| UCK2  | Thiamine metabolism        | LIHC | -0.170406196 |
| UCK2  | Tnfa_signaling_via_nfkb    | LIHC | -0.096269066 |
| UCK2  | Tryptophan metabolism      | LIHC | -0.295080396 |
| UCK2  | Tumor endothelial cell     | LIHC | 0.11710054   |
| UCK2  | Tyrosine metabolism        | LIHC | -0.30829791  |
| UCK2  | Ubiquinone and other terp  | LIHC | -0.123641473 |
| UCK2  | Valine, leucine and isoleu | LIHC | 0.015875348  |
| UCK2  | Valine, leucine and isoleu | LIHC | -0.320191063 |
| UCK2  | Vascular endothelial cell  | LIHC | -0.259316223 |
| UCK2  | Vascular smooth muscle c   | LIHC | -0.250571066 |
| UCK2  | Vegf_signaling_pathway     | LIHC | -0.218554636 |
| UCK2  | Vitamin b6 metabolism      | LIHC | -0.008160399 |
| UCK2  | Willert_wnt_signaling      | LIHC | 0.091314272  |
| UCK2  | Wnt_beta_catenin_signali   | LIHC | 0.110933626  |
| UCKL1 | Abnormal plasma cell       | LIHC | -0.136208751 |
| UCKL1 | Activated b cell           | LIHC | -0.013372934 |
| UCKL1 | Activated cd4+ t cell      | LIHC | -0.127436126 |
| UCKL1 | Activated t cell           | LIHC | -0.019552221 |
| UCKL1 | Alanine, aspartate and glu | LIHC | -0.173439415 |
| UCKL1 | Alcala_apoptosis           | LIHC | 0.173654771  |
| UCKL1 | Alpha-linolenic acid meta  | LIHC | -0.164947819 |
| UCKL1 | Amino sugar and nucleoti   | LIHC | -0.177861705 |
| UCKL1 | Ampk_pathway               | LIHC | 0.193937535  |
| UCKL1 | Angiogenesis               | LIHC | -0.364883986 |
| UCKL1 | Arachidonic acid metabol   | LIHC | -0.228151896 |
| UCKL1 | Arginine and proline metæ  | LIHC | -0.106695396 |
| UCKL1 | Arginine biosynthesis      | LIHC | -0.121663209 |
| UCKL1 | Ascorbate and aldarate mε  | LIHC | -0.237241369 |
| UCKL1 | Atypical memory b cell     | LIHC | -0.100452909 |
| UCKL1 | Axl+siglec6+ dendritic ce  | LIHC | -0.313062298 |
| UCKL1 | B cell                     | LIHC | -0.139534241 |
| UCKL1 | B1 cell                    | LIHC | -0.080574509 |
| UCKL1 | Basal cell                 | LIHC | -0.035480767 |
| UCKL1 | Beta-alanine metabolism    | LIHC | -0.288614796 |
| UCKL1 | Biosynthesis of unsaturate | LIHC | -0.139165186 |

|       |                             |      |              |
|-------|-----------------------------|------|--------------|
| UCKL1 | Biotin metabolism           | LIHC | -0.112323803 |
| UCKL1 | Butanoate metabolism        | LIHC | -0.117625757 |
| UCKL1 | Caffeine metabolism         | LIHC | -0.330371167 |
| UCKL1 | Cancer stem cell            | LIHC | -0.201147485 |
| UCKL1 | Cancer stem-like cell       | LIHC | -0.083206447 |
| UCKL1 | Cd4+ cytotoxic t cell       | LIHC | -0.196841351 |
| UCKL1 | Cd4+ memory t cell          | LIHC | -0.085231361 |
| UCKL1 | Cd4+ regulatory t cell      | LIHC | -0.115780219 |
| UCKL1 | Cd4+ t helper cell          | LIHC | -0.099436322 |
| UCKL1 | Cd4+cd25+ regulatory t c    | LIHC | -0.098302433 |
| UCKL1 | Cd8+ cytotoxic t cell       | LIHC | -0.01715927  |
| UCKL1 | Cd8+ regulatory t cell      | LIHC | -0.015566189 |
| UCKL1 | Cell_cycle                  | LIHC | 0.307241957  |
| UCKL1 | Chandran_metastasis_top5    | LIHC | -0.021425175 |
| UCKL1 | Citrate cycle (tca cycle)   | LIHC | -0.205139384 |
| UCKL1 | Cysteine and methionine r   | LIHC | -0.125017342 |
| UCKL1 | Cytokine induced killer c   | LIHC | -0.06012665  |
| UCKL1 | D-arginine and d-ornithin   | LIHC | -0.064383227 |
| UCKL1 | D-glutamine and d-glutan    | LIHC | -0.130856952 |
| UCKL1 | Dendritic cell              | LIHC | -0.241792422 |
| UCKL1 | Dna_repair                  | LIHC | 0.402241523  |
| UCKL1 | Dna_replication             | LIHC | 0.394856427  |
| UCKL1 | Double-negative memory      | LIHC | 0.132334057  |
| UCKL1 | Drug metabolism - cytoch    | LIHC | -0.228481196 |
| UCKL1 | Drug metabolism - other c   | LIHC | -0.060357535 |
| UCKL1 | E2f_targets                 | LIHC | 0.35189034   |
| UCKL1 | Ecm_receptor_interaction    | LIHC | -0.365816609 |
| UCKL1 | Effector cd4+ memory t (    | LIHC | -0.218564643 |
| UCKL1 | Effector cd8+ memory t (    | LIHC | -0.241511539 |
| UCKL1 | Effector memory t cell      | LIHC | -0.185008    |
| UCKL1 | Effector regulatory t (treg | LIHC | -0.162371008 |
| UCKL1 | Elvidge_hif1a_targets_up    | LIHC | -0.236079321 |
| UCKL1 | Endothelial cell            | LIHC | -0.259757028 |
| UCKL1 | Eosinophil                  | LIHC | -0.176536093 |
| UCKL1 | Ether lipid metabolism      | LIHC | -0.095063807 |
| UCKL1 | Exhausted cd4+ t cell       | LIHC | -0.209869478 |
| UCKL1 | Exhausted cd8+ t cell       | LIHC | -0.19325864  |
| UCKL1 | Exhausted t cell            | LIHC | -0.00026036  |
| UCKL1 | Fat cell (adipocyte)        | LIHC | -0.080599941 |
| UCKL1 | Fatty acid biosynthesis     | LIHC | -0.161342515 |
| UCKL1 | Fatty acid degradation      | LIHC | -0.178069377 |
| UCKL1 | Fatty acid elongation       | LIHC | -0.034697968 |
| UCKL1 | Fibroblast                  | LIHC | -0.386587288 |

|       |                              |      |              |
|-------|------------------------------|------|--------------|
| UCKL1 | Folate biosynthesis          | LIHC | -0.243592044 |
| UCKL1 | Follicular b cell            | LIHC | -0.113976207 |
| UCKL1 | Follicular dendritic cell    | LIHC | -0.082918276 |
| UCKL1 | Follicular helper (tfh) t ce | LIHC | -0.162100813 |
| UCKL1 | Follicular t cell            | LIHC | 0.080873713  |
| UCKL1 | Foxp3+il-17+ t cell          | LIHC | -0.089021366 |
| UCKL1 | Fructose and mannose me      | LIHC | -0.081464787 |
| UCKL1 | G2m_checkpoint               | LIHC | 0.289279657  |
| UCKL1 | Galactose metabolism         | LIHC | -0.256063357 |
| UCKL1 | Galie_tumor_stemness_ge      | LIHC | -0.303538801 |
| UCKL1 | Glutathione metabolism       | LIHC | -0.126222131 |
| UCKL1 | Glycerolipid metabolism      | LIHC | -0.234841931 |
| UCKL1 | Glycerophospholipid metæ     | LIHC | -0.06381787  |
| UCKL1 | Glycine, serine and threor   | LIHC | -0.124211612 |
| UCKL1 | Glycolysis / gluconeogene    | LIHC | -0.212760978 |
| UCKL1 | Glycosaminoglycan biosy      | LIHC | -0.159503118 |
| UCKL1 | Glycosaminoglycan biosy      | LIHC | -0.092502598 |
| UCKL1 | Glycosaminoglycan biosy      | LIHC | -0.102293507 |
| UCKL1 | Glycosaminoglycan degra      | LIHC | -0.27270455  |
| UCKL1 | Glycosphingolipid biosyn     | LIHC | -0.224344114 |
| UCKL1 | Glycosphingolipid biosyn     | LIHC | -0.08939639  |
| UCKL1 | Glycosphingolipid biosyn     | LIHC | -0.092034673 |
| UCKL1 | Glycosylphosphatidylinos     | LIHC | 0.257580288  |
| UCKL1 | Glyoxylate and dicarboxy     | LIHC | -0.081824222 |
| UCKL1 | Granulocyte                  | LIHC | -0.185345465 |
| UCKL1 | Hedgehog_signaling           | LIHC | -0.335923608 |
| UCKL1 | Histidine metabolism         | LIHC | -0.296121393 |
| UCKL1 | Hypoxia                      | LIHC | -0.309343778 |
| UCKL1 | Il-17alpha t cell            | LIHC | -0.08231237  |
| UCKL1 | Il2_stat5_signaling          | LIHC | -0.343616475 |
| UCKL1 | Il6_jak_stat3_signaling      | LIHC | -0.40293522  |
| UCKL1 | Immune_checkpoints_turr      | LIHC | -0.121065051 |
| UCKL1 | Immune_inhibition_cytok      | LIHC | -0.175026859 |
| UCKL1 | Inositol phosphate metabo    | LIHC | -0.247158952 |
| UCKL1 | Interleukin_6_signaling      | LIHC | -0.415318033 |
| UCKL1 | Jaeger_metastasis_up         | LIHC | -0.020009539 |
| UCKL1 | Jain_nfkb_signaling          | LIHC | 0.213116279  |
| UCKL1 | Kras_signaling_up            | LIHC | -0.427480756 |
| UCKL1 | Linoleic acid metabolism     | LIHC | -0.210597132 |
| UCKL1 | Lipoic acid metabolism       | LIHC | 0.046078303  |
| UCKL1 | Lysine degradation           | LIHC | -0.107204508 |
| UCKL1 | Lysosome                     | LIHC | -0.227118065 |
| UCKL1 | M1 macrophage                | LIHC | -0.238903581 |



|       |                             |      |              |
|-------|-----------------------------|------|--------------|
| UCKL1 | M2 macrophage               | LIHC | -0.249169067 |
| UCKL1 | Mannose type o-glycan bi    | LIHC | 0.167619397  |
| UCKL1 | Mapk_signaling_pathway      | LIHC | -0.407335809 |
| UCKL1 | Mapk3_erk1_activation       | LIHC | -0.302737343 |
| UCKL1 | Marginal zone b cell        | LIHC | -0.202699494 |
| UCKL1 | Memory b cell               | LIHC | -0.049415705 |
| UCKL1 | Mesenchymal cell            | LIHC | -0.199592589 |
| UCKL1 | Mesenchymal stem cell       | LIHC | -0.354730113 |
| UCKL1 | Metabolism of xenobiotic    | LIHC | -0.230958895 |
| UCKL1 | Migrating cancer stem cel   | LIHC | 0.098603423  |
| UCKL1 | Mitotic_spindle             | LIHC | 0.080139861  |
| UCKL1 | Monocyte                    | LIHC | -0.219014272 |
| UCKL1 | Mtor_signaling_pathway      | LIHC | -0.242290597 |
| UCKL1 | Mtorc1_signaling            | LIHC | -0.087082925 |
| UCKL1 | Mucin type o-glycan bios    | LIHC | -0.284982814 |
| UCKL1 | Myc_targets_v1              | LIHC | 0.360079585  |
| UCKL1 | Myeloid cell                | LIHC | -0.236045346 |
| UCKL1 | N-glycan biosynthesis       | LIHC | -0.139956954 |
| UCKL1 | Naive b cell                | LIHC | 0.154207621  |
| UCKL1 | Naive cd4+ t cell           | LIHC | -0.267205239 |
| UCKL1 | Naive cd8+ t cell           | LIHC | -0.176998178 |
| UCKL1 | Natural killer cell         | LIHC | -0.150574839 |
| UCKL1 | Natural killer t (nkt) cell | LIHC | 0.08539695   |
| UCKL1 | Natural regulatory t (treg) | LIHC | -0.177721443 |
| UCKL1 | Neomycin, kanamycin an      | LIHC | -0.161040387 |
| UCKL1 | Neutrophil                  | LIHC | -0.263968405 |
| UCKL1 | Nicotinate and nicotinami   | LIHC | -0.3134781   |
| UCKL1 | Nitrogen metabolism         | LIHC | -0.197982168 |
| UCKL1 | Nod_like_receptor_signal    | LIHC | -0.267793378 |
| UCKL1 | Notch_signaling             | LIHC | -0.197732411 |
| UCKL1 | One carbon pool by folate   | LIHC | -0.168114503 |
| UCKL1 | Other glycan degradation    | LIHC | -0.138618688 |
| UCKL1 | Other types of o-glycan b   | LIHC | 0.174963479  |
| UCKL1 | Oxidative phosphorylatio    | LIHC | 0.033704079  |
| UCKL1 | P53_pathway                 | LIHC | -0.242423323 |
| UCKL1 | P53_signaling_pathway       | LIHC | -0.139163333 |
| UCKL1 | Pantothenate and coa bios   | LIHC | -0.02431465  |
| UCKL1 | Pentose and glucuronate i   | LIHC | -0.223362608 |
| UCKL1 | Pentose phosphate pathwa    | LIHC | -0.02539771  |
| UCKL1 | Pericyte                    | LIHC | -0.304113518 |
| UCKL1 | Phenylalanine metabolism    | LIHC | -0.292306859 |
| UCKL1 | Phenylalanine, tyrosine ar  | LIHC | -0.099261004 |
| UCKL1 | Phosphonate and phosphir    | LIHC | -0.223292426 |

|       |                            |      |              |
|-------|----------------------------|------|--------------|
| UCKL1 | Pi3k_akt_activation        | LIHC | -0.200453609 |
| UCKL1 | Pi3k_akt_mtor_signaling    | LIHC | -0.113559313 |
| UCKL1 | Porphyrin and chlorophyl   | LIHC | -0.260808598 |
| UCKL1 | Primary bile acid biosynt  | LIHC | -0.203765064 |
| UCKL1 | Propanoate metabolism      | LIHC | -0.190892668 |
| UCKL1 | Purine metabolism          | LIHC | 0.051981884  |
| UCKL1 | Pyrimidine metabolism      | LIHC | 0.322685897  |
| UCKL1 | Pyruvate metabolism        | LIHC | -0.187044948 |
| UCKL1 | Regulation_of_autophagy    | LIHC | -0.107395771 |
| UCKL1 | Retinol metabolism         | LIHC | -0.209523987 |
| UCKL1 | Riboflavin metabolism      | LIHC | 0.029670234  |
| UCKL1 | Schmahl_pdgf_signaling     | LIHC | -0.392636635 |
| UCKL1 | Selenocompound metabol     | LIHC | -0.1755859   |
| UCKL1 | Signaling_by_hippo         | LIHC | -0.165792236 |
| UCKL1 | Sphingolipid metabolism    | LIHC | -0.154047923 |
| UCKL1 | Starch and sucrose metabo  | LIHC | -0.294343824 |
| UCKL1 | Steroid biosynthesis       | LIHC | 0.154001558  |
| UCKL1 | Steroid hormone biosynth   | LIHC | -0.234088703 |
| UCKL1 | Sulfur metabolism          | LIHC | -0.185034856 |
| UCKL1 | Synthesis and degradation  | LIHC | -0.025215145 |
| UCKL1 | T helper cell              | LIHC | -0.209480153 |
| UCKL1 | T helper1 (th1) cell       | LIHC | -0.123154853 |
| UCKL1 | T helper17 (th17) cell     | LIHC | -0.194971979 |
| UCKL1 | T helper2 (th2) cell       | LIHC | -0.177078768 |
| UCKL1 | T helper9 (th9) cell       | LIHC | -0.106046232 |
| UCKL1 | Taurine and hypotaurine r  | LIHC | -0.029926144 |
| UCKL1 | Terpenoid backbone biosy   | LIHC | 0.117267154  |
| UCKL1 | Tgf_beta_signaling_pathw   | LIHC | -0.212727329 |
| UCKL1 | Thiamine metabolism        | LIHC | -0.239771537 |
| UCKL1 | Tnfa_signaling_via_nfkb    | LIHC | -0.354951878 |
| UCKL1 | Tryptophan metabolism      | LIHC | -0.201361261 |
| UCKL1 | Tumor endothelial cell     | LIHC | 0.037349416  |
| UCKL1 | Tyrosine metabolism        | LIHC | -0.226554521 |
| UCKL1 | Ubiquinone and other ter   | LIHC | -0.119184754 |
| UCKL1 | Valine, leucine and isoleu | LIHC | -0.168545283 |
| UCKL1 | Valine, leucine and isoleu | LIHC | -0.188281241 |
| UCKL1 | Vascular endothelial cell  | LIHC | -0.362362665 |
| UCKL1 | Vascular smooth muscle c   | LIHC | -0.238799492 |
| UCKL1 | Vegf_signaling_pathway     | LIHC | -0.237327897 |
| UCKL1 | Vitamin b6 metabolism      | LIHC | 0.062033334  |
| UCKL1 | Willert_wnt_signaling      | LIHC | 0.101661342  |
| UCKL1 | Wnt_beta_catenin_signali   | LIHC | -0.006499205 |
| UPP1  | Abnormal plasma cell       | LIHC | 0.125500947  |

|      |                            |      |              |
|------|----------------------------|------|--------------|
| UPP1 | Activated b cell           | LIHC | 0.253827342  |
| UPP1 | Activated cd4+ t cell      | LIHC | 0.177555391  |
| UPP1 | Activated t cell           | LIHC | 0.192995208  |
| UPP1 | Alanine, aspartate and glu | LIHC | -0.185317645 |
| UPP1 | Alcala_apoptosis           | LIHC | 0.402625214  |
| UPP1 | Alpha-linolenic acid meta  | LIHC | 0.067419808  |
| UPP1 | Amino sugar and nucleoti   | LIHC | 0.303421984  |
| UPP1 | Ampk_pathway               | LIHC | -0.096032478 |
| UPP1 | Angiogenesis               | LIHC | 0.283648633  |
| UPP1 | Arachidonic acid metabol   | LIHC | 0.327878971  |
| UPP1 | Arginine and proline meta  | LIHC | 0.014946226  |
| UPP1 | Arginine biosynthesis      | LIHC | -0.303836582 |
| UPP1 | Ascorbate and aldarate mε  | LIHC | -0.292881064 |
| UPP1 | Atypical memory b cell     | LIHC | -0.144235609 |
| UPP1 | Axl+siglec6+ dendritic ce  | LIHC | 0.352046928  |
| UPP1 | B cell                     | LIHC | 0.263431822  |
| UPP1 | B1 cell                    | LIHC | 0.13223987   |
| UPP1 | Basal cell                 | LIHC | 0.576316923  |
| UPP1 | Beta-alanine metabolism    | LIHC | -0.265095758 |
| UPP1 | Biosynthesis of unsaturate | LIHC | -0.183936422 |
| UPP1 | Biotin metabolism          | LIHC | -0.283241153 |
| UPP1 | Butanoate metabolism       | LIHC | -0.282863077 |
| UPP1 | Caffeine metabolism        | LIHC | -0.22170008  |
| UPP1 | Cancer stem cell           | LIHC | 0.121160743  |
| UPP1 | Cancer stem-like cell      | LIHC | 0.132118477  |
| UPP1 | Cd4+ cytotoxic t cell      | LIHC | 0.299868428  |
| UPP1 | Cd4+ memory t cell         | LIHC | 0.095053271  |
| UPP1 | Cd4+ regulatory t cell     | LIHC | 0.106121014  |
| UPP1 | Cd4+ t helper cell         | LIHC | 0.205734345  |
| UPP1 | Cd4+cd25+ regulatory t c   | LIHC | 0.218218822  |
| UPP1 | Cd8+ cytotoxic t cell      | LIHC | 0.153598299  |
| UPP1 | Cd8+ regulatory t cell     | LIHC | 0.11013343   |
| UPP1 | Cell_cycle                 | LIHC | 0.03441925   |
| UPP1 | Chandran_metastasis_top5   | LIHC | -0.350284335 |
| UPP1 | Citrate cycle (tca cycle)  | LIHC | -0.113175166 |
| UPP1 | Cysteine and methionine r  | LIHC | -0.049985737 |
| UPP1 | Cytokine induced killer cε | LIHC | 0.271651415  |
| UPP1 | D-arginine and d-ornithin  | LIHC | -0.250245778 |
| UPP1 | D-glutamine and d-glutan   | LIHC | -0.249274397 |
| UPP1 | Dendritic cell             | LIHC | 0.210964026  |
| UPP1 | Dna_repair                 | LIHC | 0.078563316  |
| UPP1 | Dna_replication            | LIHC | 0.118022496  |
| UPP1 | Double-negative memory     | LIHC | 0.193933744  |

|      |                              |      |              |
|------|------------------------------|------|--------------|
| UPP1 | Drug metabolism - cytoch     | LIHC | -0.233412591 |
| UPP1 | Drug metabolism - other      | LIHC | -0.005626096 |
| UPP1 | E2f_targets                  | LIHC | 0.07994098   |
| UPP1 | Ecm_receptor_interaction     | LIHC | 0.145700533  |
| UPP1 | Effector cd4+ memory t       | LIHC | 0.017779034  |
| UPP1 | Effector cd8+ memory t       | LIHC | 0.293667236  |
| UPP1 | Effector memory t cell       | LIHC | 0.112024485  |
| UPP1 | Effector regulatory t (treg) | LIHC | 0.18743936   |
| UPP1 | Elvidge_hif1a_targets_up     | LIHC | 0.126411048  |
| UPP1 | Endothelial cell             | LIHC | 0.151822969  |
| UPP1 | Eosinophil                   | LIHC | 0.389332184  |
| UPP1 | Ether lipid metabolism       | LIHC | 0.241162581  |
| UPP1 | Exhausted cd4+ t cell        | LIHC | 0.301930754  |
| UPP1 | Exhausted cd8+ t cell        | LIHC | 0.319565114  |
| UPP1 | Exhausted t cell             | LIHC | 0.236357349  |
| UPP1 | Fat cell (adipocyte)         | LIHC | -0.141166361 |
| UPP1 | Fatty acid biosynthesis      | LIHC | -0.154700472 |
| UPP1 | Fatty acid degradation       | LIHC | -0.360725073 |
| UPP1 | Fatty acid elongation        | LIHC | -0.005903725 |
| UPP1 | Fibroblast                   | LIHC | 0.113341881  |
| UPP1 | Folate biosynthesis          | LIHC | -0.130537228 |
| UPP1 | Follicular b cell            | LIHC | 0.147804513  |
| UPP1 | Follicular dendritic cell    | LIHC | 0.05671143   |
| UPP1 | Follicular helper (tfh) t ce | LIHC | -0.002666931 |
| UPP1 | Follicular t cell            | LIHC | 0.249740317  |
| UPP1 | Foxp3+il-17+ t cell          | LIHC | -0.203795841 |
| UPP1 | Fructose and mannose me      | LIHC | 0.405993867  |
| UPP1 | G2m_checkpoint               | LIHC | 0.04112457   |
| UPP1 | Galactose metabolism         | LIHC | 0.393360258  |
| UPP1 | Galie_tumor_stemness_ge      | LIHC | -0.171150274 |
| UPP1 | Glutathione metabolism       | LIHC | 0.195870096  |
| UPP1 | Glycerolipid metabolism      | LIHC | -0.029475426 |
| UPP1 | Glycerophospholipid met      | LIHC | 0.264879963  |
| UPP1 | Glycine, serine and threor   | LIHC | -0.222056061 |
| UPP1 | Glycolysis / gluconeogene    | LIHC | 0.104434763  |
| UPP1 | Glycosaminoglycan biosy      | LIHC | 0.437786322  |
| UPP1 | Glycosaminoglycan biosy      | LIHC | -0.09137149  |
| UPP1 | Glycosaminoglycan biosy      | LIHC | 0.286905541  |
| UPP1 | Glycosaminoglycan degra      | LIHC | 0.087095226  |
| UPP1 | Glycosphingolipid biosyn     | LIHC | 0.251412754  |
| UPP1 | Glycosphingolipid biosyn     | LIHC | 0.313654941  |
| UPP1 | Glycosphingolipid biosyn     | LIHC | 0.33820107   |
| UPP1 | Glycosylphosphatidylinos     | LIHC | -0.189283853 |

|      |                             |      |              |
|------|-----------------------------|------|--------------|
| UPP1 | Glyoxylate and dicarboxy    | LIHC | -0.297282026 |
| UPP1 | Granulocyte                 | LIHC | 0.303446626  |
| UPP1 | Hedgehog_signaling          | LIHC | 0.008936536  |
| UPP1 | Histidine metabolism        | LIHC | -0.300268505 |
| UPP1 | Hypoxia                     | LIHC | 0.44494274   |
| UPP1 | Il-17alpha t cell           | LIHC | 0.197926891  |
| UPP1 | Il2_stat5_signaling         | LIHC | 0.274168319  |
| UPP1 | Il6_jak_stat3_signaling     | LIHC | 0.171241977  |
| UPP1 | Immune_checkpoints_turr     | LIHC | 0.343399238  |
| UPP1 | Immune_inhibition_cytok     | LIHC | 0.357094054  |
| UPP1 | Inositol phosphate metabo   | LIHC | -0.227023261 |
| UPP1 | Interleukin_6_signaling     | LIHC | -0.170855859 |
| UPP1 | Jaeger_metastasis_up        | LIHC | 0.234700629  |
| UPP1 | Jain_nfkb_signaling         | LIHC | -0.171149275 |
| UPP1 | Kras_signaling_up           | LIHC | 0.188537193  |
| UPP1 | Linoleic acid metabolism    | LIHC | -0.03215839  |
| UPP1 | Lipoic acid metabolism      | LIHC | -0.173355883 |
| UPP1 | Lysine degradation          | LIHC | -0.498391317 |
| UPP1 | Lysosome                    | LIHC | 0.239590767  |
| UPP1 | M1 macrophage               | LIHC | 0.246045952  |
| UPP1 | M2 macrophage               | LIHC | 0.197524006  |
| UPP1 | Mannose type o-glycan bi    | LIHC | 0.151533893  |
| UPP1 | Mapk_signaling_pathway      | LIHC | 0.03931473   |
| UPP1 | Mapk3_erk1_activation       | LIHC | -0.249556768 |
| UPP1 | Marginal zone b cell        | LIHC | 0.094838811  |
| UPP1 | Memory b cell               | LIHC | 0.233933223  |
| UPP1 | Mesenchymal cell            | LIHC | 0.319918146  |
| UPP1 | Mesenchymal stem cell       | LIHC | 0.202779596  |
| UPP1 | Metabolism of xenobiotic    | LIHC | -0.130903799 |
| UPP1 | Migrating cancer stem cel   | LIHC | 0.136859474  |
| UPP1 | Mitotic_spindle             | LIHC | -0.175298011 |
| UPP1 | Monocyte                    | LIHC | 0.429708021  |
| UPP1 | Mtor_signaling_pathway      | LIHC | -0.140928873 |
| UPP1 | Mtorc1_signaling            | LIHC | 0.234284976  |
| UPP1 | Mucin type o-glycan biosy   | LIHC | -0.012921229 |
| UPP1 | Myc_targets_v1              | LIHC | 0.183704959  |
| UPP1 | Myeloid cell                | LIHC | 0.194448556  |
| UPP1 | N-glycan biosynthesis       | LIHC | -0.26425092  |
| UPP1 | Naive b cell                | LIHC | 0.301971589  |
| UPP1 | Naive cd4+ t cell           | LIHC | -0.0927815   |
| UPP1 | Naive cd8+ t cell           | LIHC | -0.063945897 |
| UPP1 | Natural killer cell         | LIHC | 0.196875658  |
| UPP1 | Natural killer t (nkt) cell | LIHC | 0.252032726  |

|      |                                  |              |
|------|----------------------------------|--------------|
| UPP1 | Natural regulatory t (treg) LIHC | 0.187802291  |
| UPP1 | Neomycin, kanamycin and LIHC     | 0.32854773   |
| UPP1 | Neutrophil LIHC                  | 0.413719877  |
| UPP1 | Nicotinate and nicotinami LIHC   | -0.095935013 |
| UPP1 | Nitrogen metabolism LIHC         | -0.397525763 |
| UPP1 | Nod_like_receptor_signal LIHC    | 0.17877697   |
| UPP1 | Notch_signaling LIHC             | 0.214695085  |
| UPP1 | One carbon pool by folate LIHC   | -0.078201866 |
| UPP1 | Other glycan degradation LIHC    | -0.109060331 |
| UPP1 | Other types of o-glycan b LIHC   | 0.07140888   |
| UPP1 | Oxidative phosphorylation LIHC   | 0.193595045  |
| UPP1 | P53_pathway LIHC                 | 0.369054434  |
| UPP1 | P53_signaling_pathway LIHC       | -0.062078634 |
| UPP1 | Pantothenate and coa bios LIHC   | -0.077883152 |
| UPP1 | Pentose and glucuronate in LIHC  | -0.167153876 |
| UPP1 | Pentose phosphate pathway LIHC   | 0.283606233  |
| UPP1 | Pericyte LIHC                    | 0.033170395  |
| UPP1 | Phenylalanine metabolism LIHC    | -0.116123009 |
| UPP1 | Phenylalanine, tyrosine ar LIHC  | 0.079757408  |
| UPP1 | Phosphonate and phosphir LIHC    | -0.299272051 |
| UPP1 | Pi3k_akt_activation LIHC         | -0.398897723 |
| UPP1 | Pi3k_akt_mtor_signaling LIHC     | 0.137422828  |
| UPP1 | Porphyrin and chlorophyll LIHC   | -0.129632854 |
| UPP1 | Primary bile acid biosynt LIHC   | -0.341473076 |
| UPP1 | Propanoate metabolism LIHC       | -0.331819471 |
| UPP1 | Purine metabolism LIHC           | 0.139099005  |
| UPP1 | Pyrimidine metabolism LIHC       | 0.085968682  |
| UPP1 | Pyruvate metabolism LIHC         | -0.169677541 |
| UPP1 | Regulation_of_autophagy LIHC     | 0.002666718  |
| UPP1 | Retinol metabolism LIHC          | -0.244148422 |
| UPP1 | Riboflavin metabolism LIHC       | -0.050969456 |
| UPP1 | Schmahl_pdgf_signaling LIHC      | -0.257757021 |
| UPP1 | Selenocompound metabol LIHC      | -0.34495367  |
| UPP1 | Signaling_by_hippo LIHC          | -0.25981857  |
| UPP1 | Sphingolipid metabolism LIHC     | -0.130664806 |
| UPP1 | Starch and sucrose metabo LIHC   | 0.178310261  |
| UPP1 | Steroid biosynthesis LIHC        | -0.22170554  |
| UPP1 | Steroid hormone biosynth LIHC    | -0.23541241  |
| UPP1 | Sulfur metabolism LIHC           | -0.350812004 |
| UPP1 | Synthesis and degradation LIHC   | -0.174896833 |
| UPP1 | T helper cell LIHC               | 0.093683801  |
| UPP1 | T helper1 (th1) cell LIHC        | 0.152404704  |
| UPP1 | T helper17 (th17) cell LIHC      | 0.13486779   |

|      |                            |      |              |
|------|----------------------------|------|--------------|
| UPP1 | T helper2 (th2) cell       | LIHC | 0.214264183  |
| UPP1 | T helper9 (th9) cell       | LIHC | 0.245918716  |
| UPP1 | Taurine and hypotaurine r  | LIHC | 0.101293834  |
| UPP1 | Terpenoid backbone biosy   | LIHC | -0.120365433 |
| UPP1 | Tgf_beta_signaling_pathw   | LIHC | -0.145141999 |
| UPP1 | Thiamine metabolism        | LIHC | 0.096691187  |
| UPP1 | Tnfa_signaling_via_nfkB    | LIHC | 0.234906318  |
| UPP1 | Tryptophan metabolism      | LIHC | -0.305355429 |
| UPP1 | Tumor endothelial cell     | LIHC | 0.194823349  |
| UPP1 | Tyrosine metabolism        | LIHC | -0.270489839 |
| UPP1 | Ubiquinone and other ter   | LIHC | 0.013820958  |
| UPP1 | Valine, leucine and isoleu | LIHC | 0.479420641  |
| UPP1 | Valine, leucine and isoleu | LIHC | -0.342671918 |
| UPP1 | Vascular endothelial cell  | LIHC | 0.015747975  |
| UPP1 | Vascular smooth muscle c   | LIHC | 0.09795392   |
| UPP1 | Vegf_signaling_pathway     | LIHC | 0.148684832  |
| UPP1 | Vitamin b6 metabolism      | LIHC | -0.153681755 |
| UPP1 | Willert_wnt_signaling      | LIHC | 0.20307442   |
| UPP1 | Wnt_beta_catenin_signali   | LIHC | -0.274363899 |
| UPP2 | Abnormal plasma cell       | LIHC | -0.022429269 |
| UPP2 | Activated b cell           | LIHC | 0.026509664  |
| UPP2 | Activated cd4+ t cell      | LIHC | 0.118158188  |
| UPP2 | Activated t cell           | LIHC | 0.083819901  |
| UPP2 | Alanine, aspartate and glu | LIHC | 0.344709668  |
| UPP2 | Alcala_apoptosis           | LIHC | -0.056036358 |
| UPP2 | Alpha-linolenic acid meta  | LIHC | 0.391008107  |
| UPP2 | Amino sugar and nucleoti   | LIHC | 0.112267679  |
| UPP2 | Ampk_pathway               | LIHC | -0.060166582 |
| UPP2 | Angiogenesis               | LIHC | 0.101325008  |
| UPP2 | Arachidonic acid metaboli  | LIHC | 0.320581295  |
| UPP2 | Arginine and proline met   | LIHC | 0.346412576  |
| UPP2 | Arginine biosynthesis      | LIHC | 0.452279943  |
| UPP2 | Ascorbate and aldarate me  | LIHC | 0.321646821  |
| UPP2 | Atypical memory b cell     | LIHC | 0.115165382  |
| UPP2 | Axl+siglec6+ dendritic ce  | LIHC | 0.111652659  |
| UPP2 | B cell                     | LIHC | 0.133226489  |
| UPP2 | B1 cell                    | LIHC | 0.088969976  |
| UPP2 | Basal cell                 | LIHC | -0.06053342  |
| UPP2 | Beta-alanine metabolism    | LIHC | 0.389962044  |
| UPP2 | Biosynthesis of unsaturate | LIHC | 0.297349002  |
| UPP2 | Biotin metabolism          | LIHC | 0.297858879  |
| UPP2 | Butanoate metabolism       | LIHC | 0.358246072  |
| UPP2 | Caffeine metabolism        | LIHC | 0.353805659  |

|      |                             |      |              |
|------|-----------------------------|------|--------------|
| UPP2 | Cancer stem cell            | LIHC | 0.031761999  |
| UPP2 | Cancer stem-like cell       | LIHC | -0.082792825 |
| UPP2 | Cd4+ cytotoxic t cell       | LIHC | 0.065112098  |
| UPP2 | Cd4+ memory t cell          | LIHC | 0.090149981  |
| UPP2 | Cd4+ regulatory t cell      | LIHC | 0.288119483  |
| UPP2 | Cd4+ t helper cell          | LIHC | 0.136507018  |
| UPP2 | Cd4+cd25+ regulatory t c    | LIHC | 0.122087813  |
| UPP2 | Cd8+ cytotoxic t cell       | LIHC | 0.111422507  |
| UPP2 | Cd8+ regulatory t cell      | LIHC | 0.08499025   |
| UPP2 | Cell_cycle                  | LIHC | -0.27755849  |
| UPP2 | Chandran_metastasis_top5    | LIHC | -0.232025227 |
| UPP2 | Citrate cycle (tca cycle)   | LIHC | 0.345181882  |
| UPP2 | Cysteine and methionine r   | LIHC | 0.369076716  |
| UPP2 | Cytokine induced killer c   | LIHC | 0.014743947  |
| UPP2 | D-arginine and d-ornithin   | LIHC | 0.2986638    |
| UPP2 | D-glutamine and d-glutan    | LIHC | 0.264161418  |
| UPP2 | Dendritic cell              | LIHC | 0.126116371  |
| UPP2 | Dna_repair                  | LIHC | -0.108031814 |
| UPP2 | Dna_replication             | LIHC | -0.239591197 |
| UPP2 | Double-negative memory      | LIHC | -0.016511427 |
| UPP2 | Drug metabolism - cytoch    | LIHC | 0.384972799  |
| UPP2 | Drug metabolism - other     | LIHC | 0.352338826  |
| UPP2 | E2f_targets                 | LIHC | -0.253583068 |
| UPP2 | Ecm_receptor_interaction    | LIHC | 0.0801742    |
| UPP2 | Effector cd4+ memory t (    | LIHC | 0.113846608  |
| UPP2 | Effector cd8+ memory t (    | LIHC | 0.006687234  |
| UPP2 | Effector memory t cell      | LIHC | 0.123398176  |
| UPP2 | Effector regulatory t (treg | LIHC | 0.175227571  |
| UPP2 | Elvidge_hif1a_targets_up    | LIHC | 0.011937201  |
| UPP2 | Endothelial cell            | LIHC | 0.089989389  |
| UPP2 | Eosinophil                  | LIHC | 0.076390747  |
| UPP2 | Ether lipid metabolism      | LIHC | -0.004830034 |
| UPP2 | Exhausted cd4+ t cell       | LIHC | 0.09016314   |
| UPP2 | Exhausted cd8+ t cell       | LIHC | 0.068674522  |
| UPP2 | Exhausted t cell            | LIHC | 0.084947085  |
| UPP2 | Fat cell (adipocyte)        | LIHC | 0.331537446  |
| UPP2 | Fatty acid biosynthesis     | LIHC | 0.157001578  |
| UPP2 | Fatty acid degradation      | LIHC | 0.364344613  |
| UPP2 | Fatty acid elongation       | LIHC | 0.202126967  |
| UPP2 | Fibroblast                  | LIHC | 0.133636508  |
| UPP2 | Folate biosynthesis         | LIHC | 0.424160024  |
| UPP2 | Follicular b cell           | LIHC | 0.057395204  |
| UPP2 | Follicular dendritic cell   | LIHC | 0.033592422  |



|      |                              |      |              |
|------|------------------------------|------|--------------|
| UPP2 | Follicular helper (tfh) t ce | LIHC | 0.167881046  |
| UPP2 | Follicular t cell            | LIHC | -0.044016756 |
| UPP2 | Foxp3+il-17+ t cell          | LIHC | 0.26393891   |
| UPP2 | Fructose and mannose me      | LIHC | 0.064904086  |
| UPP2 | G2m_checkpoint               | LIHC | -0.316676395 |
| UPP2 | Galactose metabolism         | LIHC | 0.156620707  |
| UPP2 | Galie_tumor_stemness_ge      | LIHC | -0.038866397 |
| UPP2 | Glutathione metabolism       | LIHC | 0.315222194  |
| UPP2 | Glycerolipid metabolism      | LIHC | 0.463365649  |
| UPP2 | Glycerophospholipid met      | LIHC | 0.189787499  |
| UPP2 | Glycine, serine and threo    | LIHC | 0.435090493  |
| UPP2 | Glycolysis / gluconeogene    | LIHC | 0.273285503  |
| UPP2 | Glycosaminoglycan biosyn     | LIHC | -0.036989343 |
| UPP2 | Glycosaminoglycan biosyn     | LIHC | -0.229570649 |
| UPP2 | Glycosaminoglycan biosyn     | LIHC | -0.026357418 |
| UPP2 | Glycosaminoglycan degra      | LIHC | 0.040582554  |
| UPP2 | Glycosphingolipid biosyn     | LIHC | 0.146574183  |
| UPP2 | Glycosphingolipid biosyn     | LIHC | 0.108933094  |
| UPP2 | Glycosphingolipid biosyn     | LIHC | -0.108549508 |
| UPP2 | Glycosylphosphatidylinos     | LIHC | -0.141165688 |
| UPP2 | Glyoxylate and dicarboxy     | LIHC | 0.373893442  |
| UPP2 | Granulocyte                  | LIHC | 0.071110085  |
| UPP2 | Hedgehog_signaling           | LIHC | -0.179669679 |
| UPP2 | Histidine metabolism         | LIHC | 0.388987313  |
| UPP2 | Hypoxia                      | LIHC | 0.142172305  |
| UPP2 | Il-17ralpha t cell           | LIHC | 0.087309737  |
| UPP2 | Il2_stat5_signaling          | LIHC | 0.169808694  |
| UPP2 | Il6_jak_stat3_signaling      | LIHC | 0.182874342  |
| UPP2 | Immune_checkpoints_tur       | LIHC | 0.020687103  |
| UPP2 | Immune_inhibition_cytok      | LIHC | 0.19001447   |
| UPP2 | Inositol phosphate metabo    | LIHC | -0.051859224 |
| UPP2 | Interleukin_6_signaling      | LIHC | 0.157889693  |
| UPP2 | Jaeger_metastasis_up         | LIHC | -0.031656265 |
| UPP2 | Jain_nfkb_signaling          | LIHC | -0.279085152 |
| UPP2 | Kras_signaling_up            | LIHC | 0.215885423  |
| UPP2 | Linoleic acid metabolism     | LIHC | 0.415899847  |
| UPP2 | Lipoic acid metabolism       | LIHC | -0.034382884 |
| UPP2 | Lysine degradation           | LIHC | 0.231094731  |
| UPP2 | Lysosome                     | LIHC | 0.092541384  |
| UPP2 | M1 macrophage                | LIHC | 0.134706125  |
| UPP2 | M2 macrophage                | LIHC | 0.279118008  |
| UPP2 | Mannose type o-glycan bi     | LIHC | -0.180586482 |
| UPP2 | Mapk_signaling_pathway       | LIHC | 0.010251395  |

|      |                                                   |      |              |
|------|---------------------------------------------------|------|--------------|
| UPP2 | Mapk3_erk1_activation                             | LIHC | 0.140402773  |
| UPP2 | Marginal zone b cell                              | LIHC | 0.216756448  |
| UPP2 | Memory b cell                                     | LIHC | -0.097104807 |
| UPP2 | Mesenchymal cell                                  | LIHC | 0.023514219  |
| UPP2 | Mesenchymal stem cell                             | LIHC | 0.160740987  |
| UPP2 | Metabolism of xenobiotics                         | LIHC | 0.392612891  |
| UPP2 | Migrating cancer stem cell                        | LIHC | -0.132328673 |
| UPP2 | Mitotic_spindle                                   | LIHC | -0.273670214 |
| UPP2 | Monocyte                                          | LIHC | 0.096387573  |
| UPP2 | Mtor_signaling_pathway                            | LIHC | -0.039113592 |
| UPP2 | Mtorc1_signaling                                  | LIHC | 0.09050644   |
| UPP2 | Mucin type o-glycan biosynthesis                  | LIHC | -0.031939072 |
| UPP2 | Myc_targets_v1                                    | LIHC | -0.204198071 |
| UPP2 | Myeloid cell                                      | LIHC | 0.17780823   |
| UPP2 | N-glycan biosynthesis                             | LIHC | 0.098284889  |
| UPP2 | Naive b cell                                      | LIHC | -0.077360882 |
| UPP2 | Naive cd4+ t cell                                 | LIHC | 0.089854503  |
| UPP2 | Naive cd8+ t cell                                 | LIHC | -0.005876989 |
| UPP2 | Natural killer cell                               | LIHC | 0.130731985  |
| UPP2 | Natural killer t (nkt) cell                       | LIHC | -0.064148407 |
| UPP2 | Natural regulatory t (treg) cell                  | LIHC | 0.187114648  |
| UPP2 | Neomycin, kanamycin and streptomycin              | LIHC | 0.109199945  |
| UPP2 | Neutrophil                                        | LIHC | 0.149138136  |
| UPP2 | Nicotinate and nicotinamide                       | LIHC | 0.402556382  |
| UPP2 | Nitrogen metabolism                               | LIHC | 0.2767287    |
| UPP2 | Nod_like_receptor_signaling                       | LIHC | 0.073615884  |
| UPP2 | Notch_signaling                                   | LIHC | -0.030095571 |
| UPP2 | One carbon pool by folate                         | LIHC | 0.27720312   |
| UPP2 | Other glycan degradation                          | LIHC | 0.066828296  |
| UPP2 | Other types of o-glycan biosynthesis              | LIHC | -0.143303087 |
| UPP2 | Oxidative phosphorylation                         | LIHC | 0.224011097  |
| UPP2 | P53_pathway                                       | LIHC | 0.226080516  |
| UPP2 | P53_signaling_pathway                             | LIHC | 0.184812147  |
| UPP2 | Pantothenate and coenzyme a biosynthesis          | LIHC | 0.255055884  |
| UPP2 | Pentose and glucuronate interconversions          | LIHC | 0.352385453  |
| UPP2 | Pentose phosphate pathway                         | LIHC | 0.078656071  |
| UPP2 | Pericyte                                          | LIHC | 0.127331589  |
| UPP2 | Phenylalanine metabolism                          | LIHC | 0.351724005  |
| UPP2 | Phenylalanine, tyrosine and tryptophan metabolism | LIHC | 0.335054085  |
| UPP2 | Phosphonate and phosphite metabolism              | LIHC | 0.216051674  |
| UPP2 | Pi3k_akt_activation                               | LIHC | 0.164597957  |
| UPP2 | Pi3k_akt_mtor_signaling                           | LIHC | 0.009877059  |
| UPP2 | Porphyryn and chlorophyll biosynthesis            | LIHC | 0.319493283  |

|      |                            |      |              |
|------|----------------------------|------|--------------|
| UPP2 | Primary bile acid biosynt  | LIHC | 0.379927285  |
| UPP2 | Propanoate metabolism      | LIHC | 0.440246551  |
| UPP2 | Purine metabolism          | LIHC | 0.028928794  |
| UPP2 | Pyrimidine metabolism      | LIHC | -0.127342182 |
| UPP2 | Pyruvate metabolism        | LIHC | 0.405690284  |
| UPP2 | Regulation_of_autophagy    | LIHC | 0.287640529  |
| UPP2 | Retinol metabolism         | LIHC | 0.380975546  |
| UPP2 | Riboflavin metabolism      | LIHC | 0.192087875  |
| UPP2 | Schmahl_pdgf_signaling     | LIHC | 0.291198474  |
| UPP2 | Selenocompound metabol     | LIHC | 0.200815852  |
| UPP2 | Signaling_by_hippo         | LIHC | -0.141733964 |
| UPP2 | Sphingolipid metabolism    | LIHC | -0.105161719 |
| UPP2 | Starch and sucrose metabo  | LIHC | 0.292501931  |
| UPP2 | Steroid biosynthesis       | LIHC | 0.11091022   |
| UPP2 | Steroid hormone biosynth   | LIHC | 0.38486099   |
| UPP2 | Sulfur metabolism          | LIHC | 0.256493112  |
| UPP2 | Synthesis and degradation  | LIHC | 0.345065671  |
| UPP2 | T helper cell              | LIHC | 0.180603526  |
| UPP2 | T helper1 (th1) cell       | LIHC | 0.187702334  |
| UPP2 | T helper17 (th17) cell     | LIHC | 0.098392236  |
| UPP2 | T helper2 (th2) cell       | LIHC | 0.119196843  |
| UPP2 | T helper9 (th9) cell       | LIHC | 0.125488403  |
| UPP2 | Taurine and hypotaurine r  | LIHC | 0.027192677  |
| UPP2 | Terpenoid backbone biosy   | LIHC | 0.03018453   |
| UPP2 | Tgf_beta_signaling_pathw   | LIHC | -0.053303812 |
| UPP2 | Thiamine metabolism        | LIHC | 0.231509164  |
| UPP2 | Tnfa_signaling_via_nfkb    | LIHC | 0.147751876  |
| UPP2 | Tryptophan metabolism      | LIHC | 0.47728444   |
| UPP2 | Tumor endothelial cell     | LIHC | -0.137097228 |
| UPP2 | Tyrosine metabolism        | LIHC | 0.378447861  |
| UPP2 | Ubiquinone and other ter   | LIHC | 0.294862921  |
| UPP2 | Valine, leucine and isoleu | LIHC | 0.393210363  |
| UPP2 | Valine, leucine and isoleu | LIHC | 0.442421478  |
| UPP2 | Vascular endothelial cell  | LIHC | 0.285213508  |
| UPP2 | Vascular smooth muscle c   | LIHC | 0.131375755  |
| UPP2 | Vegf_signaling_pathway     | LIHC | 0.084347513  |
| UPP2 | Vitamin b6 metabolism      | LIHC | 0.171232089  |
| UPP2 | Willert_wnt_signaling      | LIHC | 0.094538749  |
| UPP2 | Wnt_beta_catenin_signali   | LIHC | -0.373485855 |
| CDA  | Abnormal plasma cell       | LUAD | -0.143566506 |
| CDA  | Activated b cell           | LUAD | 0.137308761  |
| CDA  | Activated cd4+ t cell      | LUAD | 0.212912448  |
| CDA  | Activated t cell           | LUAD | 0.266628858  |

|     |                            |      |              |
|-----|----------------------------|------|--------------|
| CDA | Alanine, aspartate and glu | LUAD | -0.055364773 |
| CDA | Alcala_apoptosis           | LUAD | 0.234506939  |
| CDA | Alpha-linolenic acid meta  | LUAD | -0.096722783 |
| CDA | Amino sugar and nucleoti   | LUAD | 0.289265115  |
| CDA | Ampk_pathway               | LUAD | -0.093108854 |
| CDA | Angiogenesis               | LUAD | 0.318392252  |
| CDA | Arachidonic acid metabol   | LUAD | 0.115402904  |
| CDA | Arginine and proline meta  | LUAD | 0.027238245  |
| CDA | Arginine biosynthesis      | LUAD | 0.039201572  |
| CDA | Ascorbate and aldarate me  | LUAD | -0.046797521 |
| CDA | Atypical memory b cell     | LUAD | 0.042863829  |
| CDA | Axl+siglec6+ dendritic ce  | LUAD | 0.202660581  |
| CDA | B cell                     | LUAD | 0.094133625  |
| CDA | B1 cell                    | LUAD | 0.032926104  |
| CDA | Basal cell                 | LUAD | 0.510750945  |
| CDA | Beta-alanine metabolism    | LUAD | -0.094106069 |
| CDA | Biosynthesis of unsaturate | LUAD | 0.033523423  |
| CDA | Biotin metabolism          | LUAD | -0.041501357 |
| CDA | Butanoate metabolism       | LUAD | -0.309995337 |
| CDA | Caffeine metabolism        | LUAD | 0.037599124  |
| CDA | Cancer stem cell           | LUAD | 0.200177051  |
| CDA | Cancer stem-like cell      | LUAD | 0.026453584  |
| CDA | Cd4+ cytotoxic t cell      | LUAD | 0.268204945  |
| CDA | Cd4+ memory t cell         | LUAD | 0.10313361   |
| CDA | Cd4+ regulatory t cell     | LUAD | 0.281074961  |
| CDA | Cd4+ t helper cell         | LUAD | 0.191970576  |
| CDA | Cd4+cd25+ regulatory t c   | LUAD | 0.221086901  |
| CDA | Cd8+ cytotoxic t cell      | LUAD | 0.24629      |
| CDA | Cd8+ regulatory t cell     | LUAD | 0.203583163  |
| CDA | Cell_cycle                 | LUAD | 0.130853337  |
| CDA | Chandran_metastasis_top    | LUAD | -0.046795957 |
| CDA | Citrate cycle (tca cycle)  | LUAD | -0.007378    |
| CDA | Cysteine and methionine r  | LUAD | 0.072163189  |
| CDA | Cytokine induced killer c  | LUAD | 0.08871469   |
| CDA | D-arginine and d-ornithin  | LUAD | -0.006362622 |
| CDA | D-glutamine and d-glutan   | LUAD | 0.01050498   |
| CDA | Dendritic cell             | LUAD | 0.225729877  |
| CDA | Dna_repair                 | LUAD | 0.110486324  |
| CDA | Dna_replication            | LUAD | 0.109716484  |
| CDA | Double-negative memory     | LUAD | 0.043546661  |
| CDA | Drug metabolism - cytoch   | LUAD | -0.031620435 |
| CDA | Drug metabolism - other    | LUAD | 0.198579361  |
| CDA | E2f_targets                | LUAD | 0.069396504  |

|     |                                   |              |
|-----|-----------------------------------|--------------|
| CDA | Ecm_receptor_interaction LUAD     | 0.270766587  |
| CDA | Effector cd4+ memory t ( LUAD     | 0.132591034  |
| CDA | Effector cd8+ memory t ( LUAD     | 0.264777129  |
| CDA | Effector memory t cell LUAD       | 0.167039826  |
| CDA | Effector regulatory t (treg LUAD  | 0.190157443  |
| CDA | Elvidge_hif1a_targets_up LUAD     | -0.00248433  |
| CDA | Endothelial cell LUAD             | 0.161691636  |
| CDA | Eosinophil LUAD                   | 0.261309409  |
| CDA | Ether lipid metabolism LUAD       | 0.033548406  |
| CDA | Exhausted cd4+ t cell LUAD        | 0.305458442  |
| CDA | Exhausted cd8+ t cell LUAD        | 0.332793873  |
| CDA | Exhausted t cell LUAD             | 0.224885991  |
| CDA | Fat cell (adipocyte) LUAD         | 0.111507584  |
| CDA | Fatty acid biosynthesis LUAD      | 0.033799311  |
| CDA | Fatty acid degradation LUAD       | -0.207874111 |
| CDA | Fatty acid elongation LUAD        | 0.09245347   |
| CDA | Fibroblast LUAD                   | 0.270731859  |
| CDA | Folate biosynthesis LUAD          | -0.00221117  |
| CDA | Follicular b cell LUAD            | 0.127155001  |
| CDA | Follicular dendritic cell LUAD    | 0.052172349  |
| CDA | Follicular helper (tfh) t ce LUAD | 0.212190667  |
| CDA | Follicular t cell LUAD            | 0.258280244  |
| CDA | Foxp3+il-17+ t cell LUAD          | 0.226511229  |
| CDA | Fructose and mannose me LUAD      | 0.237514411  |
| CDA | G2m_checkpoint LUAD               | 0.045776174  |
| CDA | Galactose metabolism LUAD         | 0.422876478  |
| CDA | Galie_tumor_stemness_ge LUAD      | 0.158530459  |
| CDA | Glutathione metabolism LUAD       | 0.109869016  |
| CDA | Glycerolipid metabolism LUAD      | -0.002973114 |
| CDA | Glycerophospholipid metæ LUAD     | -0.07189171  |
| CDA | Glycine, serine and threor LUAD   | 0.025074632  |
| CDA | Glycolysis / gluconeogene LUAD    | 0.174040308  |
| CDA | Glycosaminoglycan biosy1 LUAD     | 0.305409295  |
| CDA | Glycosaminoglycan biosy1 LUAD     | -0.074474666 |
| CDA | Glycosaminoglycan biosy1 LUAD     | 0.150304121  |
| CDA | Glycosaminoglycan degra LUAD      | 0.14613304   |
| CDA | Glycosphingolipid biosyn1 LUAD    | 0.102608392  |
| CDA | Glycosphingolipid biosyn1 LUAD    | 0.24438755   |
| CDA | Glycosphingolipid biosyn1 LUAD    | 0.198267443  |
| CDA | Glycosylphosphatidylinos: LUAD    | -0.190783453 |
| CDA | Glyoxylate and dicarboxy LUAD     | -0.088308026 |
| CDA | Granulocyte LUAD                  | 0.251316024  |
| CDA | Hedgehog_signaling LUAD           | -0.012144099 |

|     |                             |      |              |
|-----|-----------------------------|------|--------------|
| CDA | Histidine metabolism        | LUAD | -0.102616626 |
| CDA | Hypoxia                     | LUAD | 0.407528223  |
| CDA | Il-17alpha t cell           | LUAD | 0.180352091  |
| CDA | Il2_stat5_signaling         | LUAD | 0.346575812  |
| CDA | Il6_jak_stat3_signaling     | LUAD | 0.354803159  |
| CDA | Immune_checkpoints_tur      | LUAD | 0.30371217   |
| CDA | Immune_inhibition_cytok     | LUAD | 0.325925441  |
| CDA | Inositol phosphate metabo   | LUAD | -0.113977272 |
| CDA | Interleukin_6_signaling     | LUAD | 0.068200418  |
| CDA | Jaeger_metastasis_up        | LUAD | 0.194431102  |
| CDA | Jain_nfkb_signaling         | LUAD | 0.045149307  |
| CDA | Kras_signaling_up           | LUAD | 0.301150036  |
| CDA | Linoleic acid metabolism    | LUAD | -0.087067232 |
| CDA | Lipoic acid metabolism      | LUAD | -0.01603538  |
| CDA | Lysine degradation          | LUAD | -0.32028651  |
| CDA | Lysosome                    | LUAD | 0.141782053  |
| CDA | M1 macrophage               | LUAD | 0.274108908  |
| CDA | M2 macrophage               | LUAD | 0.253010763  |
| CDA | Mannose type o-glycan bi    | LUAD | -0.19102778  |
| CDA | Mapk_signaling_pathway      | LUAD | 0.161346744  |
| CDA | Mapk3_erk1_activation       | LUAD | 0.163315705  |
| CDA | Marginal zone b cell        | LUAD | 0.05862105   |
| CDA | Memory b cell               | LUAD | 0.081661145  |
| CDA | Mesenchymal cell            | LUAD | 0.324982102  |
| CDA | Mesenchymal stem cell       | LUAD | 0.217154715  |
| CDA | Metabolism of xenobiotic    | LUAD | -0.011788572 |
| CDA | Migrating cancer stem cel   | LUAD | 0.32856846   |
| CDA | Mitotic_spindle             | LUAD | 0.063215094  |
| CDA | Monocyte                    | LUAD | 0.385635753  |
| CDA | Mtor_signaling_pathway      | LUAD | 0.087010999  |
| CDA | Mtorc1_signaling            | LUAD | 0.173875813  |
| CDA | Mucin type o-glycan biosy   | LUAD | 0.089492633  |
| CDA | Myc_targets_v1              | LUAD | 0.108036078  |
| CDA | Myeloid cell                | LUAD | 0.232294636  |
| CDA | N-glycan biosynthesis       | LUAD | -0.068807227 |
| CDA | Naive b cell                | LUAD | 0.014272539  |
| CDA | Naive cd4+ t cell           | LUAD | 0.13312622   |
| CDA | Naive cd8+ t cell           | LUAD | 0.024928589  |
| CDA | Natural killer cell         | LUAD | 0.240691035  |
| CDA | Natural killer t (nkt) cell | LUAD | 0.22021183   |
| CDA | Natural regulatory t (treg) | LUAD | 0.169357284  |
| CDA | Neomycin, kanamycin and     | LUAD | 0.257407064  |
| CDA | Neutrophil                  | LUAD | 0.398310552  |

|     |                                  |              |
|-----|----------------------------------|--------------|
| CDA | Nicotinate and nicotinami LUAD   | 0.118081568  |
| CDA | Nitrogen metabolism LUAD         | -0.068719614 |
| CDA | Nod_like_receptor_signal: LUAD   | 0.302843699  |
| CDA | Notch_signaling LUAD             | 0.123298372  |
| CDA | One carbon pool by folate LUAD   | 0.017425061  |
| CDA | Other glycan degradation LUAD    | -0.06397321  |
| CDA | Other types of o-glycan b: LUAD  | -0.096181563 |
| CDA | Oxidative phosphorylatior LUAD   | 0.055402307  |
| CDA | P53_pathway LUAD                 | 0.280584634  |
| CDA | P53_signaling_pathway LUAD       | 0.257837947  |
| CDA | Pantothenate and coa bios LUAD   | -0.0586336   |
| CDA | Pentose and glucuronate i LUAD   | 0.039870502  |
| CDA | Pentose phosphate pathwa LUAD    | 0.290710088  |
| CDA | Pericyte LUAD                    | 0.236122661  |
| CDA | Phenylalanine metabolism LUAD    | 0.114923966  |
| CDA | Phenylalanine, tyrosine ar LUAD  | 0.053078669  |
| CDA | Phosphonate and phosphir LUAD    | 0.053800397  |
| CDA | Pi3k_akt_activation LUAD         | 0.035782385  |
| CDA | Pi3k_akt_mtor_signaling LUAD     | 0.264019483  |
| CDA | Porphyrin and chlorophyl LUAD    | 0.02302513   |
| CDA | Primary bile acid biosyntfl LUAD | -0.002464705 |
| CDA | Propanoate metabolism LUAD       | -0.251407028 |
| CDA | Purine metabolism LUAD           | 0.070499233  |
| CDA | Pyrimidine metabolism LUAD       | 0.155975377  |
| CDA | Pyruvate metabolism LUAD         | -0.158365752 |
| CDA | Regulation_of_autophagy LUAD     | 0.061739298  |
| CDA | Retinol metabolism LUAD          | -0.022248805 |
| CDA | Riboflavin metabolism LUAD       | 0.085557149  |
| CDA | Schmahl_pdgf_signaling LUAD      | 0.214216609  |
| CDA | Selenocompound metabol LUAD      | -0.220332015 |
| CDA | Signaling_by_hippo LUAD          | -0.073626792 |
| CDA | Sphingolipid metabolism LUAD     | -0.110808455 |
| CDA | Starch and sucrose metabo LUAD   | 0.232079361  |
| CDA | Steroid biosynthesis LUAD        | -0.180717052 |
| CDA | Steroid hormone biosynth LUAD    | 0.05386376   |
| CDA | Sulfur metabolism LUAD           | 0.024016984  |
| CDA | Synthesis and degradation LUAD   | -0.309025001 |
| CDA | T helper cell LUAD               | 0.247886458  |
| CDA | T helper1 (th1) cell LUAD        | 0.329189224  |
| CDA | T helper17 (th17) cell LUAD      | 0.227138767  |
| CDA | T helper2 (th2) cell LUAD        | 0.264363368  |
| CDA | T helper9 (th9) cell LUAD        | 0.187122494  |
| CDA | Taurine and hypotaurine r LUAD   | -0.243417817 |

|      |                            |      |              |
|------|----------------------------|------|--------------|
| CDA  | Terpenoid backbone biosy   | LUAD | -0.125225539 |
| CDA  | Tgf_beta_signaling_pathw   | LUAD | -0.02288884  |
| CDA  | Thiamine metabolism        | LUAD | -0.03394615  |
| CDA  | Tnfa_signaling_via_nfk     | LUAD | 0.38966197   |
| CDA  | Tryptophan metabolism      | LUAD | -0.108019888 |
| CDA  | Tumor endothelial cell     | LUAD | 0.262329831  |
| CDA  | Tyrosine metabolism        | LUAD | 0.101835936  |
| CDA  | Ubiquinone and other ter   | LUAD | 0.047056817  |
| CDA  | Valine, leucine and isoleu | LUAD | 0.118308404  |
| CDA  | Valine, leucine and isoleu | LUAD | -0.292631125 |
| CDA  | Vascular endothelial cell  | LUAD | 0.10174881   |
| CDA  | Vascular smooth muscle c   | LUAD | 0.102778477  |
| CDA  | Vegf_signaling_pathway     | LUAD | 0.167919989  |
| CDA  | Vitamin b6 metabolism      | LUAD | 0.102283192  |
| CDA  | Willert_wnt_signaling      | LUAD | 0.113777473  |
| CDA  | Wnt_beta_catenin_signali   | LUAD | -0.054610876 |
| UCK1 | Abnormal plasma cell       | LUAD | 0.127876046  |
| UCK1 | Activated b cell           | LUAD | 0.005046679  |
| UCK1 | Activated cd4+ t cell      | LUAD | -0.027278716 |
| UCK1 | Activated t cell           | LUAD | -0.028683283 |
| UCK1 | Alanine, aspartate and glu | LUAD | -0.09135772  |
| UCK1 | Alcala_apoptosis           | LUAD | 0.054316065  |
| UCK1 | Alpha-linolenic acid meta  | LUAD | 0.000712442  |
| UCK1 | Amino sugar and nucleoti   | LUAD | 0.058865833  |
| UCK1 | Ampk_pathway               | LUAD | -0.004786912 |
| UCK1 | Angiogenesis               | LUAD | -0.231494882 |
| UCK1 | Arachidonic acid metabol   | LUAD | 0.02686539   |
| UCK1 | Arginine and proline met   | LUAD | -0.021774221 |
| UCK1 | Arginine biosynthesis      | LUAD | -0.097069943 |
| UCK1 | Ascorbate and aldarate m   | LUAD | -0.026868327 |
| UCK1 | Atypical memory b cell     | LUAD | 0.007486098  |
| UCK1 | Axl+siglec6+ dendritic ce  | LUAD | -0.090473057 |
| UCK1 | B cell                     | LUAD | -0.027899435 |
| UCK1 | B1 cell                    | LUAD | -0.008129753 |
| UCK1 | Basal cell                 | LUAD | -0.085898792 |
| UCK1 | Beta-alanine metabolism    | LUAD | -0.098528232 |
| UCK1 | Biosynthesis of unsaturate | LUAD | 0.020942326  |
| UCK1 | Biotin metabolism          | LUAD | 0.031675216  |
| UCK1 | Butanoate metabolism       | LUAD | 0.089666743  |
| UCK1 | Caffeine metabolism        | LUAD | -0.150307857 |
| UCK1 | Cancer stem cell           | LUAD | -0.162056201 |
| UCK1 | Cancer stem-like cell      | LUAD | -0.096593578 |
| UCK1 | Cd4+ cytotoxic t cell      | LUAD | -0.009603776 |



|      |                              |      |              |
|------|------------------------------|------|--------------|
| UCK1 | Cd4+ memory t cell           | LUAD | -0.030731153 |
| UCK1 | Cd4+ regulatory t cell       | LUAD | -0.051656129 |
| UCK1 | Cd4+ t helper cell           | LUAD | -0.015011058 |
| UCK1 | Cd4+cd25+ regulatory t c     | LUAD | -0.031411467 |
| UCK1 | Cd8+ cytotoxic t cell        | LUAD | 0.00876621   |
| UCK1 | Cd8+ regulatory t cell       | LUAD | -0.021011015 |
| UCK1 | Cell_cycle                   | LUAD | -0.011507025 |
| UCK1 | Chandran_metastasis_top5     | LUAD | -0.23674366  |
| UCK1 | Citrate cycle (tca cycle)    | LUAD | 0.006974802  |
| UCK1 | Cysteine and methionine r    | LUAD | 0.012195073  |
| UCK1 | Cytokine induced killer c    | LUAD | 0.077750461  |
| UCK1 | D-arginine and d-ornithin    | LUAD | 0.022697583  |
| UCK1 | D-glutamine and d-glutan     | LUAD | -0.148039044 |
| UCK1 | Dendritic cell               | LUAD | -0.040743645 |
| UCK1 | Dna_repair                   | LUAD | 0.235344817  |
| UCK1 | Dna_replication              | LUAD | 0.147973278  |
| UCK1 | Double-negative memory       | LUAD | 0.065232826  |
| UCK1 | Drug metabolism - cytoch     | LUAD | -0.023998484 |
| UCK1 | Drug metabolism - other c    | LUAD | 0.090214295  |
| UCK1 | E2f_targets                  | LUAD | 0.003304197  |
| UCK1 | Ecm_receptor_interaction     | LUAD | -0.254620581 |
| UCK1 | Effector cd4+ memory t (     | LUAD | -0.066653342 |
| UCK1 | Effector cd8+ memory t (     | LUAD | -0.044263687 |
| UCK1 | Effector memory t cell       | LUAD | -0.058867442 |
| UCK1 | Effector regulatory t (treg  | LUAD | -0.07281117  |
| UCK1 | Elvidge_hif1a_targets_up     | LUAD | -0.16535375  |
| UCK1 | Endothelial cell             | LUAD | -0.111279084 |
| UCK1 | Eosinophil                   | LUAD | -0.033436467 |
| UCK1 | Ether lipid metabolism       | LUAD | -0.110381312 |
| UCK1 | Exhausted cd4+ t cell        | LUAD | -0.029991987 |
| UCK1 | Exhausted cd8+ t cell        | LUAD | -0.034290197 |
| UCK1 | Exhausted t cell             | LUAD | 0.007558979  |
| UCK1 | Fat cell (adipocyte)         | LUAD | 0.093060463  |
| UCK1 | Fatty acid biosynthesis      | LUAD | -0.035735377 |
| UCK1 | Fatty acid degradation       | LUAD | 0.058780469  |
| UCK1 | Fatty acid elongation        | LUAD | 0.102518843  |
| UCK1 | Fibroblast                   | LUAD | -0.1390183   |
| UCK1 | Folate biosynthesis          | LUAD | 0.182524991  |
| UCK1 | Follicular b cell            | LUAD | -0.031777244 |
| UCK1 | Follicular dendritic cell    | LUAD | -0.053770291 |
| UCK1 | Follicular helper (tfh) t ce | LUAD | -0.019736219 |
| UCK1 | Follicular t cell            | LUAD | 0.053316564  |
| UCK1 | Foxp3+il-17+ t cell          | LUAD | 0.004778687  |

|      |                            |      |              |
|------|----------------------------|------|--------------|
| UCK1 | Fructose and mannose me    | LUAD | 0.024773649  |
| UCK1 | G2m_checkpoint             | LUAD | -0.080332568 |
| UCK1 | Galactose metabolism       | LUAD | -0.029092574 |
| UCK1 | Galie_tumor_stemness_ge    | LUAD | -0.140697679 |
| UCK1 | Glutathione metabolism     | LUAD | 0.128041741  |
| UCK1 | Glycerolipid metabolism    | LUAD | 0.044864612  |
| UCK1 | Glycerophospholipid metæ   | LUAD | 0.010377275  |
| UCK1 | Glycine, serine and threor | LUAD | 0.159116555  |
| UCK1 | Glycolysis / gluconeogene  | LUAD | -0.026295501 |
| UCK1 | Glycosaminoglycan biosy1   | LUAD | -0.030927586 |
| UCK1 | Glycosaminoglycan biosy1   | LUAD | -0.021956342 |
| UCK1 | Glycosaminoglycan biosy1   | LUAD | -0.047407253 |
| UCK1 | Glycosaminoglycan degra    | LUAD | 0.006114015  |
| UCK1 | Glycosphingolipid biosyn1  | LUAD | 0.032652903  |
| UCK1 | Glycosphingolipid biosyn1  | LUAD | 0.000578641  |
| UCK1 | Glycosphingolipid biosyn1  | LUAD | 0.010955597  |
| UCK1 | Glycosylphosphatidylinos   | LUAD | 0.061889367  |
| UCK1 | Glyoxylate and dicarboxy   | LUAD | 0.118937033  |
| UCK1 | Granulocyte                | LUAD | -0.031392343 |
| UCK1 | Hedgehog_signaling         | LUAD | -0.177464258 |
| UCK1 | Histidine metabolism       | LUAD | -0.018003588 |
| UCK1 | Hypoxia                    | LUAD | -0.144027239 |
| UCK1 | Il-17ralpha t cell         | LUAD | -0.032985629 |
| UCK1 | Il2_stat5_signaling        | LUAD | -0.171282379 |
| UCK1 | Il6_jak_stat3_signaling    | LUAD | -0.110131029 |
| UCK1 | Immune_checkpoints_tunr    | LUAD | 0.007369203  |
| UCK1 | Immune_inhibition_cytok    | LUAD | -0.040393514 |
| UCK1 | Inositol phosphate metabo  | LUAD | -0.235491902 |
| UCK1 | Interleukin_6_signaling    | LUAD | -0.316502052 |
| UCK1 | Jaeger_metastasis_up       | LUAD | -0.072886526 |
| UCK1 | Jain_nfkb_signaling        | LUAD | -0.044308453 |
| UCK1 | Kras_signaling_up          | LUAD | -0.186858085 |
| UCK1 | Linoleic acid metabolism   | LUAD | -0.046329685 |
| UCK1 | Lipoic acid metabolism     | LUAD | 0.133756586  |
| UCK1 | Lysine degradation         | LUAD | -0.004524708 |
| UCK1 | Lysosome                   | LUAD | -0.049865415 |
| UCK1 | M1 macrophage              | LUAD | -0.056171127 |
| UCK1 | M2 macrophage              | LUAD | -0.072241072 |
| UCK1 | Mannose type o-glycan bi   | LUAD | 0.1848987    |
| UCK1 | Mapk_signaling_pathway     | LUAD | -0.192720054 |
| UCK1 | Mapk3_erk1_activation      | LUAD | -0.318018678 |
| UCK1 | Marginal zone b cell       | LUAD | -0.073308329 |
| UCK1 | Memory b cell              | LUAD | -0.013008886 |

|      |                             |      |              |
|------|-----------------------------|------|--------------|
| UCK1 | Mesenchymal cell            | LUAD | -0.055133694 |
| UCK1 | Mesenchymal stem cell       | LUAD | -0.137835051 |
| UCK1 | Metabolism of xenobiotic    | LUAD | 0.025305639  |
| UCK1 | Migrating cancer stem cel   | LUAD | -0.156357879 |
| UCK1 | Mitotic_spindle             | LUAD | -0.251361475 |
| UCK1 | Monocyte                    | LUAD | -0.029951806 |
| UCK1 | Mtor_signaling_pathway      | LUAD | -0.12412052  |
| UCK1 | Mtorc1_signaling            | LUAD | -0.060398015 |
| UCK1 | Mucin type o-glycan biosy   | LUAD | -0.214002532 |
| UCK1 | Myc_targets_v1              | LUAD | 0.02319429   |
| UCK1 | Myeloid cell                | LUAD | -0.065690153 |
| UCK1 | N-glycan biosynthesis       | LUAD | 0.067896604  |
| UCK1 | Naive b cell                | LUAD | 0.072310067  |
| UCK1 | Naive cd4+ t cell           | LUAD | -0.128426468 |
| UCK1 | Naive cd8+ t cell           | LUAD | -0.086843198 |
| UCK1 | Natural killer cell         | LUAD | -0.035165651 |
| UCK1 | Natural killer t (nkt) cell | LUAD | 0.125977586  |
| UCK1 | Natural regulatory t (treg) | LUAD | -0.102482761 |
| UCK1 | Neomycin, kanamycin and     | LUAD | -0.141240171 |
| UCK1 | Neutrophil                  | LUAD | -0.082537486 |
| UCK1 | Nicotinate and nicotinami   | LUAD | 0.083160522  |
| UCK1 | Nitrogen metabolism         | LUAD | -0.024537314 |
| UCK1 | Nod_like_receptor_signal    | LUAD | -0.138791868 |
| UCK1 | Notch_signaling             | LUAD | -0.104159313 |
| UCK1 | One carbon pool by folate   | LUAD | 0.01618795   |
| UCK1 | Other glycan degradation    | LUAD | 0.06378407   |
| UCK1 | Other types of o-glycan b   | LUAD | 0.17951721   |
| UCK1 | Oxidative phosphorylatio    | LUAD | 0.275804106  |
| UCK1 | P53_pathway                 | LUAD | 0.037226842  |
| UCK1 | P53_signaling_pathway       | LUAD | -0.118959482 |
| UCK1 | Pantothenate and coa bios   | LUAD | 0.055867928  |
| UCK1 | Pentose and glucuronate i   | LUAD | 0.027159595  |
| UCK1 | Pentose phosphate pathwa    | LUAD | 0.036500269  |
| UCK1 | Pericyte                    | LUAD | -0.084776709 |
| UCK1 | Phenylalanine metabolism    | LUAD | -0.080077073 |
| UCK1 | Phenylalanine, tyrosine ar  | LUAD | -0.007682019 |
| UCK1 | Phosphonate and phosphir    | LUAD | 0.042729998  |
| UCK1 | Pi3k_akt_activation         | LUAD | -0.187150947 |
| UCK1 | Pi3k_akt_mtor_signaling     | LUAD | -0.092588277 |
| UCK1 | Porphyrin and chlorophyl    | LUAD | 0.09085253   |
| UCK1 | Primary bile acid biosynt   | LUAD | 0.119122656  |
| UCK1 | Propanoate metabolism       | LUAD | -0.031454898 |
| UCK1 | Purine metabolism           | LUAD | 0.076662985  |

|      |                            |      |              |
|------|----------------------------|------|--------------|
| UCK1 | Pyrimidine metabolism      | LUAD | 0.130243407  |
| UCK1 | Pyruvate metabolism        | LUAD | 0.082082597  |
| UCK1 | Regulation_of_autophagy    | LUAD | 0.046443147  |
| UCK1 | Retinol metabolism         | LUAD | -0.030055252 |
| UCK1 | Riboflavin metabolism      | LUAD | 0.179602855  |
| UCK1 | Schmahl_pdgf_signaling     | LUAD | -0.223117997 |
| UCK1 | Selenocompound metabol     | LUAD | -0.104754961 |
| UCK1 | Signaling_by_hippo         | LUAD | -0.243934004 |
| UCK1 | Sphingolipid metabolism    | LUAD | -0.101262132 |
| UCK1 | Starch and sucrose metabo  | LUAD | -0.156771772 |
| UCK1 | Steroid biosynthesis       | LUAD | 0.085110539  |
| UCK1 | Steroid hormone biosynth   | LUAD | -0.073150503 |
| UCK1 | Sulfur metabolism          | LUAD | -0.099105079 |
| UCK1 | Synthesis and degradation  | LUAD | 0.133903146  |
| UCK1 | T helper cell              | LUAD | -0.054075781 |
| UCK1 | T helper1 (th1) cell       | LUAD | -0.044529881 |
| UCK1 | T helper17 (th17) cell     | LUAD | -0.060825788 |
| UCK1 | T helper2 (th2) cell       | LUAD | -0.047083487 |
| UCK1 | T helper9 (th9) cell       | LUAD | -0.016464592 |
| UCK1 | Taurine and hypotaurine r  | LUAD | 0.019005269  |
| UCK1 | Terpenoid backbone biosy   | LUAD | 0.016043965  |
| UCK1 | Tgf_beta_signaling_pathw   | LUAD | -0.320184733 |
| UCK1 | Thiamine metabolism        | LUAD | 0.170413767  |
| UCK1 | Tnfa_signaling_via_nfkb    | LUAD | -0.194652554 |
| UCK1 | Tryptophan metabolism      | LUAD | 0.070650062  |
| UCK1 | Tumor endothelial cell     | LUAD | -0.10447605  |
| UCK1 | Tyrosine metabolism        | LUAD | 0.009650885  |
| UCK1 | Ubiquinone and other terp  | LUAD | 0.054985113  |
| UCK1 | Valine, leucine and isoleu | LUAD | 0.081094921  |
| UCK1 | Valine, leucine and isoleu | LUAD | 0.100557887  |
| UCK1 | Vascular endothelial cell  | LUAD | -0.098355259 |
| UCK1 | Vascular smooth muscle c   | LUAD | -0.141136018 |
| UCK1 | Vegf_signaling_pathway     | LUAD | -0.132079238 |
| UCK1 | Vitamin b6 metabolism      | LUAD | 0.019172172  |
| UCK1 | Willert_wnt_signaling      | LUAD | -0.129539264 |
| UCK1 | Wnt_beta_catenin_signali   | LUAD | -0.085615299 |
| UCK2 | Abnormal plasma cell       | LUAD | 0.136753611  |
| UCK2 | Activated b cell           | LUAD | -0.091174639 |
| UCK2 | Activated cd4+ t cell      | LUAD | -0.115802381 |
| UCK2 | Activated t cell           | LUAD | -0.026298528 |
| UCK2 | Alanine, aspartate and glu | LUAD | 0.285152795  |
| UCK2 | Alcala_apoptosis           | LUAD | 0.294611089  |
| UCK2 | Alpha-linolenic acid meta  | LUAD | -0.525303187 |

|      |                                      |      |              |
|------|--------------------------------------|------|--------------|
| UCK2 | Amino sugar and nucleoti             | LUAD | 0.132270405  |
| UCK2 | Ampk_pathway                         | LUAD | 0.348255018  |
| UCK2 | Angiogenesis                         | LUAD | 0.022693027  |
| UCK2 | Arachidonic acid metabol             | LUAD | -0.359978099 |
| UCK2 | Arginine and proline metε            | LUAD | 0.169810968  |
| UCK2 | Arginine biosynthesis                | LUAD | -0.040806485 |
| UCK2 | Ascorbate and aldarate mε            | LUAD | 0.236682691  |
| UCK2 | Atypical memory b cell               | LUAD | -0.088947205 |
| UCK2 | Axl+siglec6+ dendritic ce            | LUAD | -0.365818921 |
| UCK2 | B cell                               | LUAD | -0.164046017 |
| UCK2 | B1 cell                              | LUAD | -0.122203838 |
| UCK2 | Basal cell                           | LUAD | 0.061809658  |
| UCK2 | Beta-alanine metabolism              | LUAD | -0.094786249 |
| UCK2 | Biosynthesis of unsaturate           | LUAD | 0.027201261  |
| UCK2 | Biotin metabolism                    | LUAD | -0.149013963 |
| UCK2 | Butanoate metabolism                 | LUAD | -0.132547317 |
| UCK2 | Caffeine metabolism                  | LUAD | -0.249657132 |
| UCK2 | Cancer stem cell                     | LUAD | 0.035101246  |
| UCK2 | Cancer stem-like cell                | LUAD | -0.082511995 |
| UCK2 | Cd4+ cytotoxic t cell                | LUAD | -0.123410897 |
| UCK2 | Cd4+ memory t cell                   | LUAD | -0.148303138 |
| UCK2 | Cd4+ regulatory t cell               | LUAD | -0.126878952 |
| UCK2 | Cd4+ t helper cell                   | LUAD | -0.16015168  |
| UCK2 | Cd4+cd25+ regulatory t c             | LUAD | -0.129039338 |
| UCK2 | Cd8+ cytotoxic t cell                | LUAD | 0.02237142   |
| UCK2 | Cd8+ regulatory t cell               | LUAD | 0.009154462  |
| UCK2 | Cell_cycle                           | LUAD | 0.558082565  |
| UCK2 | Chandran_metastasis_top <sup>5</sup> | LUAD | 0.407080221  |
| UCK2 | Citrate cycle (tca cycle)            | LUAD | 0.324558901  |
| UCK2 | Cysteine and methionine r            | LUAD | 0.34957341   |
| UCK2 | Cytokine induced killer cε           | LUAD | 0.037956303  |
| UCK2 | D-arginine and d-ornithin            | LUAD | -0.085887035 |
| UCK2 | D-glutamine and d-glutan             | LUAD | -0.27726484  |
| UCK2 | Dendritic cell                       | LUAD | -0.320335992 |
| UCK2 | Dna_repair                           | LUAD | 0.359439119  |
| UCK2 | Dna_replication                      | LUAD | 0.503819438  |
| UCK2 | Double-negative memory               | LUAD | -0.038105493 |
| UCK2 | Drug metabolism - cytoch             | LUAD | -0.08970695  |
| UCK2 | Drug metabolism - other ε            | LUAD | 0.278417274  |
| UCK2 | E2f_targets                          | LUAD | 0.565819768  |
| UCK2 | Ecm_receptor_interaction             | LUAD | -0.107270574 |
| UCK2 | Effector cd4+ memory t (             | LUAD | -0.23099503  |
| UCK2 | Effector cd8+ memory t (             | LUAD | -0.16026103  |

|      |                              |      |              |
|------|------------------------------|------|--------------|
| UCK2 | Effector memory t cell       | LUAD | -0.175019908 |
| UCK2 | Effector regulatory t (treg  | LUAD | -0.176619415 |
| UCK2 | Elvidge_hif1a_targets_up     | LUAD | 0.412982786  |
| UCK2 | Endothelial cell             | LUAD | 0.027637714  |
| UCK2 | Eosinophil                   | LUAD | -0.230714172 |
| UCK2 | Ether lipid metabolism       | LUAD | -0.435633849 |
| UCK2 | Exhausted cd4+ t cell        | LUAD | 0.001451448  |
| UCK2 | Exhausted cd8+ t cell        | LUAD | -0.039713774 |
| UCK2 | Exhausted t cell             | LUAD | -0.04114772  |
| UCK2 | Fat cell (adipocyte)         | LUAD | 0.271124524  |
| UCK2 | Fatty acid biosynthesis      | LUAD | -0.109087827 |
| UCK2 | Fatty acid degradation       | LUAD | -0.267847437 |
| UCK2 | Fatty acid elongation        | LUAD | 0.156372028  |
| UCK2 | Fibroblast                   | LUAD | -0.178364255 |
| UCK2 | Folate biosynthesis          | LUAD | 0.266204258  |
| UCK2 | Follicular b cell            | LUAD | -0.189414043 |
| UCK2 | Follicular dendritic cell    | LUAD | -0.182959475 |
| UCK2 | Follicular helper (tfh) t ce | LUAD | -0.094921019 |
| UCK2 | Follicular t cell            | LUAD | 0.071703565  |
| UCK2 | Foxp3+il-17+ t cell          | LUAD | -0.017356847 |
| UCK2 | Fructose and mannose me      | LUAD | 0.142433626  |
| UCK2 | G2m_checkpoint               | LUAD | 0.576542502  |
| UCK2 | Galactose metabolism         | LUAD | 0.116332083  |
| UCK2 | Galie_tumor_stemness_ge      | LUAD | -0.30852451  |
| UCK2 | Glutathione metabolism       | LUAD | 0.184369616  |
| UCK2 | Glycerolipid metabolism      | LUAD | 0.001392004  |
| UCK2 | Glycerophospholipid metæ     | LUAD | -0.416554558 |
| UCK2 | Glycine, serine and threor   | LUAD | 0.129903099  |
| UCK2 | Glycolysis / gluconeogene    | LUAD | 0.232991901  |
| UCK2 | Glycosaminoglycan biosy      | LUAD | -0.035812615 |
| UCK2 | Glycosaminoglycan biosy      | LUAD | 0.017084134  |
| UCK2 | Glycosaminoglycan biosy      | LUAD | 0.115529777  |
| UCK2 | Glycosaminoglycan degra      | LUAD | -0.233184356 |
| UCK2 | Glycosphingolipid biosyn     | LUAD | -0.278545474 |
| UCK2 | Glycosphingolipid biosyn     | LUAD | 0.092971851  |
| UCK2 | Glycosphingolipid biosyn     | LUAD | 0.31440905   |
| UCK2 | Glycosylphosphatidylinos     | LUAD | -0.019215439 |
| UCK2 | Glyoxylate and dicarboxy     | LUAD | 0.186386399  |
| UCK2 | Granulocyte                  | LUAD | -0.198422126 |
| UCK2 | Hedgehog_signaling           | LUAD | -0.21639013  |
| UCK2 | Histidine metabolism         | LUAD | -0.275179031 |
| UCK2 | Hypoxia                      | LUAD | 0.159895216  |
| UCK2 | Il-17ralpha t cell           | LUAD | -0.085341926 |

|      |                             |      |              |
|------|-----------------------------|------|--------------|
| UCK2 | Il2_stat5_signaling         | LUAD | -0.137789928 |
| UCK2 | Il6_jak_stat3_signaling     | LUAD | -0.181645134 |
| UCK2 | Immune_checkpoints_tunr     | LUAD | -0.182741535 |
| UCK2 | Immune_inhibition_cytok     | LUAD | -0.072903055 |
| UCK2 | Inositol phosphate metabo   | LUAD | -0.277486261 |
| UCK2 | Interleukin_6_signaling     | LUAD | -0.122992341 |
| UCK2 | Jaeger_metastasis_up        | LUAD | 0.487135592  |
| UCK2 | Jain_nfkb_signaling         | LUAD | 0.479653095  |
| UCK2 | Kras_signaling_up           | LUAD | -0.190232687 |
| UCK2 | Linoleic acid metabolism    | LUAD | -0.405194871 |
| UCK2 | Lipoic acid metabolism      | LUAD | 0.028400338  |
| UCK2 | Lysine degradation          | LUAD | 0.16349306   |
| UCK2 | Lysosome                    | LUAD | -0.351784838 |
| UCK2 | M1 macrophage               | LUAD | -0.20540862  |
| UCK2 | M2 macrophage               | LUAD | -0.194059787 |
| UCK2 | Mannose type o-glycan bi    | LUAD | 0.102759134  |
| UCK2 | Mapk_signaling_pathway      | LUAD | -0.246472203 |
| UCK2 | Mapk3_erk1_activation       | LUAD | -0.058226348 |
| UCK2 | Marginal zone b cell        | LUAD | -0.182219189 |
| UCK2 | Memory b cell               | LUAD | -0.21389388  |
| UCK2 | Mesenchymal cell            | LUAD | 0.049653539  |
| UCK2 | Mesenchymal stem cell       | LUAD | -0.16557961  |
| UCK2 | Metabolism of xenobiotic    | LUAD | -0.036705317 |
| UCK2 | Migrating cancer stem cel   | LUAD | 0.085657398  |
| UCK2 | Mitotic_spindle             | LUAD | 0.257121663  |
| UCK2 | Monocyte                    | LUAD | -0.190796537 |
| UCK2 | Mtor_signaling_pathway      | LUAD | -0.146500667 |
| UCK2 | Mtorc1_signaling            | LUAD | 0.553032006  |
| UCK2 | Mucin type o-glycan biosy   | LUAD | -0.071709188 |
| UCK2 | Myc_targets_v1              | LUAD | 0.523022768  |
| UCK2 | Myeloid cell                | LUAD | -0.219370395 |
| UCK2 | N-glycan biosynthesis       | LUAD | 0.318580735  |
| UCK2 | Naive b cell                | LUAD | 0.04519534   |
| UCK2 | Naive cd4+ t cell           | LUAD | -0.311443449 |
| UCK2 | Naive cd8+ t cell           | LUAD | -0.354836033 |
| UCK2 | Natural killer cell         | LUAD | -0.111444598 |
| UCK2 | Natural killer t (nkt) cell | LUAD | 0.122650537  |
| UCK2 | Natural regulatory t (treg) | LUAD | -0.2053168   |
| UCK2 | Neomycin, kanamycin and     | LUAD | 0.038528879  |
| UCK2 | Neutrophil                  | LUAD | -0.045053627 |
| UCK2 | Nicotinate and nicotinami   | LUAD | -0.07647314  |
| UCK2 | Nitrogen metabolism         | LUAD | -0.063675399 |
| UCK2 | Nod_like_receptor_signal    | LUAD | -0.133722192 |

|      |                            |      |              |
|------|----------------------------|------|--------------|
| UCK2 | Notch_signaling            | LUAD | -0.273480441 |
| UCK2 | One carbon pool by folate  | LUAD | 0.418618543  |
| UCK2 | Other glycan degradation   | LUAD | -0.233535953 |
| UCK2 | Other types of o-glycan b  | LUAD | -0.005853015 |
| UCK2 | Oxidative phosphorylatior  | LUAD | 0.200133759  |
| UCK2 | P53_pathway                | LUAD | -0.25279623  |
| UCK2 | P53_signaling_pathway      | LUAD | 0.319883647  |
| UCK2 | Pantothenate and coa bios  | LUAD | -0.037992613 |
| UCK2 | Pentose and glucuronate i  | LUAD | 0.287883172  |
| UCK2 | Pentose phosphate pathwa   | LUAD | 0.300615291  |
| UCK2 | Pericyte                   | LUAD | -0.133570694 |
| UCK2 | Phenylalanine metabolism   | LUAD | 0.157957053  |
| UCK2 | Phenylalanine, tyrosine ar | LUAD | 0.321299777  |
| UCK2 | Phosphonate and phosphir   | LUAD | 0.136515566  |
| UCK2 | Pi3k_akt_activation        | LUAD | -0.107412276 |
| UCK2 | Pi3k_akt_mtor_signaling    | LUAD | 0.307075343  |
| UCK2 | Porphyrin and chlorophyl   | LUAD | 0.2230575    |
| UCK2 | Primary bile acid biosynt  | LUAD | -0.39294131  |
| UCK2 | Propanoate metabolism      | LUAD | -0.08868579  |
| UCK2 | Purine metabolism          | LUAD | 0.374999283  |
| UCK2 | Pyrimidine metabolism      | LUAD | 0.418519757  |
| UCK2 | Pyruvate metabolism        | LUAD | 0.150772769  |
| UCK2 | Regulation_of_autophagy    | LUAD | 0.207623976  |
| UCK2 | Retinol metabolism         | LUAD | 0.029205106  |
| UCK2 | Riboflavin metabolism      | LUAD | 0.325323807  |
| UCK2 | Schmahl_pdgf_signaling     | LUAD | -0.19365795  |
| UCK2 | Selenocompound metabol     | LUAD | 0.250887292  |
| UCK2 | Signaling_by_hippo         | LUAD | 0.006892485  |
| UCK2 | Sphingolipid metabolism    | LUAD | 0.012139092  |
| UCK2 | Starch and sucrose metabo  | LUAD | -0.088982455 |
| UCK2 | Steroid biosynthesis       | LUAD | 0.009094361  |
| UCK2 | Steroid hormone biosynth   | LUAD | 0.110919237  |
| UCK2 | Sulfur metabolism          | LUAD | 0.004696188  |
| UCK2 | Synthesis and degradation  | LUAD | -0.076588018 |
| UCK2 | T helper cell              | LUAD | -0.242584903 |
| UCK2 | T helper1 (th1) cell       | LUAD | -0.136614826 |
| UCK2 | T helper17 (th17) cell     | LUAD | -0.098356122 |
| UCK2 | T helper2 (th2) cell       | LUAD | -0.161923289 |
| UCK2 | T helper9 (th9) cell       | LUAD | -0.106079472 |
| UCK2 | Taurine and hypotaurine r  | LUAD | -0.278784207 |
| UCK2 | Terpenoid backbone biosy   | LUAD | 0.228866769  |
| UCK2 | Tgf_beta_signaling_pathw   | LUAD | -0.085340843 |
| UCK2 | Thiamine metabolism        | LUAD | -0.202468972 |



|       |                            |      |              |
|-------|----------------------------|------|--------------|
| UCK2  | Tnfa_signaling_via_nfk     | LUAD | -0.080695541 |
| UCK2  | Tryptophan metabolism      | LUAD | -0.107203045 |
| UCK2  | Tumor endothelial cell     | LUAD | 0.200840312  |
| UCK2  | Tyrosine metabolism        | LUAD | -0.072499531 |
| UCK2  | Ubiquinone and other ter   | LUAD | 0.05287024   |
| UCK2  | Valine, leucine and isoleu | LUAD | -0.045815995 |
| UCK2  | Valine, leucine and isoleu | LUAD | -0.206623712 |
| UCK2  | Vascular endothelial cell  | LUAD | -0.152469981 |
| UCK2  | Vascular smooth muscle c   | LUAD | -0.133369173 |
| UCK2  | Vegf_signaling_pathway     | LUAD | -0.342028154 |
| UCK2  | Vitamin b6 metabolism      | LUAD | 0.235320878  |
| UCK2  | Willert_wnt_signaling      | LUAD | 0.385175526  |
| UCK2  | Wnt_beta_catenin_signali   | LUAD | 0.067741758  |
| UCKL1 | Abnormal plasma cell       | LUAD | -0.008031928 |
| UCKL1 | Activated b cell           | LUAD | -0.120503199 |
| UCKL1 | Activated cd4+ t cell      | LUAD | -0.164998514 |
| UCKL1 | Activated t cell           | LUAD | -0.176287375 |
| UCKL1 | Alanine, aspartate and glu | LUAD | 0.051114542  |
| UCKL1 | Alcala_apoptosis           | LUAD | -0.063333357 |
| UCKL1 | Alpha-linolenic acid meta  | LUAD | 0.034886194  |
| UCKL1 | Amino sugar and nucleoti   | LUAD | -0.063515929 |
| UCKL1 | Ampk_pathway               | LUAD | 0.31850675   |
| UCKL1 | Angiogenesis               | LUAD | -0.23944715  |
| UCKL1 | Arachidonic acid metabol   | LUAD | -0.075310052 |
| UCKL1 | Arginine and proline meta  | LUAD | 0.006883689  |
| UCKL1 | Arginine biosynthesis      | LUAD | -0.00841768  |
| UCKL1 | Ascorbate and aldarate m   | LUAD | -0.088754521 |
| UCKL1 | Atypical memory b cell     | LUAD | -0.053212043 |
| UCKL1 | Axl+siglec6+ dendritic ce  | LUAD | -0.253722188 |
| UCKL1 | B cell                     | LUAD | -0.174969263 |
| UCKL1 | B1 cell                    | LUAD | -0.120992613 |
| UCKL1 | Basal cell                 | LUAD | -0.241393924 |
| UCKL1 | Beta-alanine metabolism    | LUAD | -0.137148847 |
| UCKL1 | Biosynthesis of unsaturate | LUAD | -0.136236823 |
| UCKL1 | Biotin metabolism          | LUAD | -0.031311388 |
| UCKL1 | Butanoate metabolism       | LUAD | 0.04361964   |
| UCKL1 | Caffeine metabolism        | LUAD | -0.187844624 |
| UCKL1 | Cancer stem cell           | LUAD | -0.29011456  |
| UCKL1 | Cancer stem-like cell      | LUAD | -0.224793689 |
| UCKL1 | Cd4+ cytotoxic t cell      | LUAD | -0.174826685 |
| UCKL1 | Cd4+ memory t cell         | LUAD | -0.123573639 |
| UCKL1 | Cd4+ regulatory t cell     | LUAD | -0.197746206 |
| UCKL1 | Cd4+ t helper cell         | LUAD | -0.186552184 |

|       |                              |      |              |
|-------|------------------------------|------|--------------|
| UCKL1 | Cd4+cd25+ regulatory t c     | LUAD | -0.188700854 |
| UCKL1 | Cd8+ cytotoxic t cell        | LUAD | -0.129881645 |
| UCKL1 | Cd8+ regulatory t cell       | LUAD | -0.139726592 |
| UCKL1 | Cell_cycle                   | LUAD | -0.024265267 |
| UCKL1 | Chandran_metastasis_top5     | LUAD | -0.088563428 |
| UCKL1 | Citrate cycle (tca cycle)    | LUAD | 0.105793773  |
| UCKL1 | Cysteine and methionine r    | LUAD | 0.044000479  |
| UCKL1 | Cytokine induced killer c    | LUAD | -0.095063439 |
| UCKL1 | D-arginine and d-ornithin    | LUAD | -0.039666689 |
| UCKL1 | D-glutamine and d-glutan     | LUAD | -0.22428945  |
| UCKL1 | Dendritic cell               | LUAD | -0.213042933 |
| UCKL1 | Dna_repair                   | LUAD | 0.176200174  |
| UCKL1 | Dna_replication              | LUAD | 0.085057725  |
| UCKL1 | Double-negative memory       | LUAD | 0.046529433  |
| UCKL1 | Drug metabolism - cytoch     | LUAD | -0.105304893 |
| UCKL1 | Drug metabolism - other c    | LUAD | -0.015787351 |
| UCKL1 | E2f_targets                  | LUAD | 0.03863871   |
| UCKL1 | Ecm_receptor_interaction     | LUAD | -0.238338349 |
| UCKL1 | Effector cd4+ memory t (     | LUAD | -0.188361666 |
| UCKL1 | Effector cd8+ memory t (     | LUAD | -0.168964487 |
| UCKL1 | Effector memory t cell       | LUAD | -0.19408348  |
| UCKL1 | Effector regulatory t (treg  | LUAD | -0.225299579 |
| UCKL1 | Elvidge_hif1a_targets_up     | LUAD | -0.15859739  |
| UCKL1 | Endothelial cell             | LUAD | -0.292265344 |
| UCKL1 | Eosinophil                   | LUAD | -0.203040721 |
| UCKL1 | Ether lipid metabolism       | LUAD | -0.09213445  |
| UCKL1 | Exhausted cd4+ t cell        | LUAD | -0.248714751 |
| UCKL1 | Exhausted cd8+ t cell        | LUAD | -0.221774714 |
| UCKL1 | Exhausted t cell             | LUAD | -0.136607992 |
| UCKL1 | Fat cell (adipocyte)         | LUAD | 0.002691464  |
| UCKL1 | Fatty acid biosynthesis      | LUAD | -0.09626599  |
| UCKL1 | Fatty acid degradation       | LUAD | -0.02693862  |
| UCKL1 | Fatty acid elongation        | LUAD | -0.083583475 |
| UCKL1 | Fibroblast                   | LUAD | -0.253466199 |
| UCKL1 | Folate biosynthesis          | LUAD | 0.030147739  |
| UCKL1 | Follicular b cell            | LUAD | -0.161490636 |
| UCKL1 | Follicular dendritic cell    | LUAD | -0.108781452 |
| UCKL1 | Follicular helper (tfh) t ce | LUAD | -0.163311147 |
| UCKL1 | Follicular t cell            | LUAD | 0.029592109  |
| UCKL1 | Foxp3+il-17+ t cell          | LUAD | -0.109131282 |
| UCKL1 | Fructose and mannose me      | LUAD | 0.103214523  |
| UCKL1 | G2m_checkpoint               | LUAD | -0.014838619 |
| UCKL1 | Galactose metabolism         | LUAD | -0.124245113 |

|       |                            |      |              |
|-------|----------------------------|------|--------------|
| UCKL1 | Galie_tumor_stemness_ge    | LUAD | -0.298334868 |
| UCKL1 | Glutathione metabolism     | LUAD | -0.053706287 |
| UCKL1 | Glycerolipid metabolism    | LUAD | 0.101134094  |
| UCKL1 | Glycerophospholipid met    | LUAD | 0.146988444  |
| UCKL1 | Glycine, serine and threor | LUAD | 0.068286132  |
| UCKL1 | Glycolysis / gluconeogene  | LUAD | -0.062055379 |
| UCKL1 | Glycosaminoglycan biosy    | LUAD | -0.101008991 |
| UCKL1 | Glycosaminoglycan biosy    | LUAD | -0.130144641 |
| UCKL1 | Glycosaminoglycan biosy    | LUAD | -0.150285673 |
| UCKL1 | Glycosaminoglycan degra    | LUAD | -0.091929823 |
| UCKL1 | Glycosphingolipid biosyn   | LUAD | -0.16143154  |
| UCKL1 | Glycosphingolipid biosyn   | LUAD | -0.23248036  |
| UCKL1 | Glycosphingolipid biosyn   | LUAD | -0.140798099 |
| UCKL1 | Glycosylphosphatidylinos   | LUAD | 0.07744307   |
| UCKL1 | Glyoxylate and dicarboxy   | LUAD | 0.167319797  |
| UCKL1 | Granulocyte                | LUAD | -0.195774882 |
| UCKL1 | Hedgehog_signaling         | LUAD | -0.198616059 |
| UCKL1 | Histidine metabolism       | LUAD | -0.090152564 |
| UCKL1 | Hypoxia                    | LUAD | -0.151315912 |
| UCKL1 | Il-17ralpha t cell         | LUAD | -0.1802104   |
| UCKL1 | Il2_stat5_signaling        | LUAD | -0.293189205 |
| UCKL1 | Il6_jak_stat3_signaling    | LUAD | -0.254515229 |
| UCKL1 | Immune_checkpoints_tur     | LUAD | -0.215097271 |
| UCKL1 | Immune_inhibition_cytok    | LUAD | -0.135816361 |
| UCKL1 | Inositol phosphate metabo  | LUAD | -0.141668783 |
| UCKL1 | Interleukin_6_signaling    | LUAD | -0.22331114  |
| UCKL1 | Jaeger_metastasis_up       | LUAD | -0.101920376 |
| UCKL1 | Jain_nfkb_signaling        | LUAD | 0.047688842  |
| UCKL1 | Kras_signaling_up          | LUAD | -0.339552976 |
| UCKL1 | Linoleic acid metabolism   | LUAD | 0.062106606  |
| UCKL1 | Lipoic acid metabolism     | LUAD | 0.006089085  |
| UCKL1 | Lysine degradation         | LUAD | 0.141098089  |
| UCKL1 | Lysosome                   | LUAD | -0.17762446  |
| UCKL1 | M1 macrophage              | LUAD | -0.227692999 |
| UCKL1 | M2 macrophage              | LUAD | -0.209271385 |
| UCKL1 | Mannose type o-glycan bi   | LUAD | 0.19283609   |
| UCKL1 | Mapk_signaling_pathway     | LUAD | -0.250721694 |
| UCKL1 | Mapk3_erk1_activation      | LUAD | -0.267658794 |
| UCKL1 | Marginal zone b cell       | LUAD | -0.17654818  |
| UCKL1 | Memory b cell              | LUAD | -0.204613591 |
| UCKL1 | Mesenchymal cell           | LUAD | -0.167884254 |
| UCKL1 | Mesenchymal stem cell      | LUAD | -0.262461213 |
| UCKL1 | Metabolism of xenobiotic   | LUAD | -0.078298053 |

|       |                             |      |              |
|-------|-----------------------------|------|--------------|
| UCKL1 | Migrating cancer stem cel   | LUAD | -0.267935516 |
| UCKL1 | Mitotic_spindle             | LUAD | -0.125204927 |
| UCKL1 | Monocyte                    | LUAD | -0.209675395 |
| UCKL1 | Mtor_signaling_pathway      | LUAD | -0.116290549 |
| UCKL1 | Mtorc1_signaling            | LUAD | -0.111958449 |
| UCKL1 | Mucin type o-glycan bios    | LUAD | -0.281977035 |
| UCKL1 | Myc_targets_v1              | LUAD | -0.002974977 |
| UCKL1 | Myeloid cell                | LUAD | -0.223377561 |
| UCKL1 | N-glycan biosynthesis       | LUAD | 0.004942905  |
| UCKL1 | Naive b cell                | LUAD | 0.009504023  |
| UCKL1 | Naive cd4+ t cell           | LUAD | -0.277402463 |
| UCKL1 | Naive cd8+ t cell           | LUAD | -0.164170672 |
| UCKL1 | Natural killer cell         | LUAD | -0.182231356 |
| UCKL1 | Natural killer t (nkt) cell | LUAD | 0.008450282  |
| UCKL1 | Natural regulatory t (treg) | LUAD | -0.236458861 |
| UCKL1 | Neomycin, kanamycin an      | LUAD | -0.157944294 |
| UCKL1 | Neutrophil                  | LUAD | -0.2316044   |
| UCKL1 | Nicotinate and nicotinami   | LUAD | -0.029920961 |
| UCKL1 | Nitrogen metabolism         | LUAD | -0.12877623  |
| UCKL1 | Nod_like_receptor_signal    | LUAD | -0.244857836 |
| UCKL1 | Notch_signaling             | LUAD | -0.176314185 |
| UCKL1 | One carbon pool by folate   | LUAD | 0.080872974  |
| UCKL1 | Other glycan degradation    | LUAD | 0.154369304  |
| UCKL1 | Other types of o-glycan b   | LUAD | 0.253607469  |
| UCKL1 | Oxidative phosphorylatio    | LUAD | 0.141300887  |
| UCKL1 | P53_pathway                 | LUAD | -0.185793126 |
| UCKL1 | P53_signaling_pathway       | LUAD | -0.245497301 |
| UCKL1 | Pantothenate and coa bios   | LUAD | -0.049914217 |
| UCKL1 | Pentose and glucuronate i   | LUAD | -0.105440495 |
| UCKL1 | Pentose phosphate pathwa    | LUAD | -0.076264926 |
| UCKL1 | Pericyte                    | LUAD | -0.214453232 |
| UCKL1 | Phenylalanine metabolism    | LUAD | -0.052298793 |
| UCKL1 | Phenylalanine, tyrosine ar  | LUAD | 0.017043618  |
| UCKL1 | Phosphonate and phosphir    | LUAD | -0.130716479 |
| UCKL1 | Pi3k_akt_activation         | LUAD | -0.245423492 |
| UCKL1 | Pi3k_akt_mtor_signaling     | LUAD | -0.208100466 |
| UCKL1 | Porphyrin and chlorophyl    | LUAD | -0.026949206 |
| UCKL1 | Primary bile acid biosynt   | LUAD | -0.091198407 |
| UCKL1 | Propanoate metabolism       | LUAD | -0.016194108 |
| UCKL1 | Purine metabolism           | LUAD | 0.039378314  |
| UCKL1 | Pyrimidine metabolism       | LUAD | 0.1214396    |
| UCKL1 | Pyruvate metabolism         | LUAD | 0.152409524  |
| UCKL1 | Regulation_of_autophagy     | LUAD | -0.028666516 |

|       |                            |      |              |
|-------|----------------------------|------|--------------|
| UCKL1 | Retinol metabolism         | LUAD | -0.126533306 |
| UCKL1 | Riboflavin metabolism      | LUAD | 0.059061382  |
| UCKL1 | Schmahl_pdgf_signaling     | LUAD | -0.359124748 |
| UCKL1 | Selenocompound metabol     | LUAD | 0.024401041  |
| UCKL1 | Signaling_by_hippo         | LUAD | -0.271148604 |
| UCKL1 | Sphingolipid metabolism    | LUAD | -0.172984054 |
| UCKL1 | Starch and sucrose metabo  | LUAD | -0.282839696 |
| UCKL1 | Steroid biosynthesis       | LUAD | 0.098676254  |
| UCKL1 | Steroid hormone biosynth   | LUAD | -0.130280839 |
| UCKL1 | Sulfur metabolism          | LUAD | -0.09721351  |
| UCKL1 | Synthesis and degradation  | LUAD | 0.116706788  |
| UCKL1 | T helper cell              | LUAD | -0.227607091 |
| UCKL1 | T helper1 (th1) cell       | LUAD | -0.217514955 |
| UCKL1 | T helper17 (th17) cell     | LUAD | -0.154929522 |
| UCKL1 | T helper2 (th2) cell       | LUAD | -0.203929697 |
| UCKL1 | T helper9 (th9) cell       | LUAD | -0.165499148 |
| UCKL1 | Taurine and hypotaurine r  | LUAD | 0.123622348  |
| UCKL1 | Terpenoid backbone biosy   | LUAD | 0.028536566  |
| UCKL1 | Tgf_beta_signaling_pathw   | LUAD | -0.28141473  |
| UCKL1 | Thiamine metabolism        | LUAD | -0.017720214 |
| UCKL1 | Tnfa_signaling_via_nfkb    | LUAD | -0.236750762 |
| UCKL1 | Tryptophan metabolism      | LUAD | -0.015168955 |
| UCKL1 | Tumor endothelial cell     | LUAD | 0.024848765  |
| UCKL1 | Tyrosine metabolism        | LUAD | -0.075217766 |
| UCKL1 | Ubiquinone and other terp  | LUAD | 0.054696386  |
| UCKL1 | Valine, leucine and isoleu | LUAD | 0.091772499  |
| UCKL1 | Valine, leucine and isoleu | LUAD | 0.038096258  |
| UCKL1 | Vascular endothelial cell  | LUAD | -0.156160326 |
| UCKL1 | Vascular smooth muscle c   | LUAD | -0.124444817 |
| UCKL1 | Vegf_signaling_pathway     | LUAD | -0.134610331 |
| UCKL1 | Vitamin b6 metabolism      | LUAD | -0.038165872 |
| UCKL1 | Willert_wnt_signaling      | LUAD | -0.102681759 |
| UCKL1 | Wnt_beta_catenin_signali   | LUAD | 0.0674535    |
| UPP1  | Abnormal plasma cell       | LUAD | -0.223104358 |
| UPP1  | Activated b cell           | LUAD | 0.119232359  |
| UPP1  | Activated cd4+ t cell      | LUAD | 0.185113841  |
| UPP1  | Activated t cell           | LUAD | 0.21793567   |
| UPP1  | Alanine, aspartate and glu | LUAD | -0.044743426 |
| UPP1  | Alcala_apoptosis           | LUAD | 0.233710955  |
| UPP1  | Alpha-linolenic acid meta  | LUAD | -0.001088756 |
| UPP1  | Amino sugar and nucleoti   | LUAD | 0.360431004  |
| UPP1  | Ampk_pathway               | LUAD | -0.160307764 |
| UPP1  | Angiogenesis               | LUAD | 0.221307495  |

|      |                                         |      |              |
|------|-----------------------------------------|------|--------------|
| UPP1 | Arachidonic acid metabolism             | LUAD | 0.078804399  |
| UPP1 | Arginine and proline metabolism         | LUAD | -0.004124146 |
| UPP1 | Arginine biosynthesis                   | LUAD | 0.004148505  |
| UPP1 | Ascorbate and aldarate metabolism       | LUAD | -0.138315613 |
| UPP1 | Atypical memory b cell                  | LUAD | 0.005885771  |
| UPP1 | Axl+siglec6+ dendritic cell             | LUAD | 0.165010343  |
| UPP1 | B cell                                  | LUAD | 0.086644636  |
| UPP1 | B1 cell                                 | LUAD | -0.044977815 |
| UPP1 | Basal cell                              | LUAD | 0.322511685  |
| UPP1 | Beta-alanine metabolism                 | LUAD | -0.213634091 |
| UPP1 | Biosynthesis of unsaturated fatty acids | LUAD | 0.196471152  |
| UPP1 | Biotin metabolism                       | LUAD | -0.00085838  |
| UPP1 | Butanoate metabolism                    | LUAD | -0.171749216 |
| UPP1 | Caffeine metabolism                     | LUAD | 0.037199453  |
| UPP1 | Cancer stem cell                        | LUAD | 0.123994221  |
| UPP1 | Cancer stem-like cell                   | LUAD | -0.009856344 |
| UPP1 | Cd4+ cytotoxic t cell                   | LUAD | 0.136518994  |
| UPP1 | Cd4+ memory t cell                      | LUAD | 0.032833898  |
| UPP1 | Cd4+ regulatory t cell                  | LUAD | 0.240965177  |
| UPP1 | Cd4+ t helper cell                      | LUAD | 0.152772765  |
| UPP1 | Cd4+cd25+ regulatory t cell             | LUAD | 0.173969744  |
| UPP1 | Cd8+ cytotoxic t cell                   | LUAD | 0.185405671  |
| UPP1 | Cd8+ regulatory t cell                  | LUAD | 0.139380778  |
| UPP1 | Cell cycle                              | LUAD | 0.095602643  |
| UPP1 | Chandran_metastasis_top50               | LUAD | -0.221714767 |
| UPP1 | Citrate cycle (tricarballic acid cycle) | LUAD | -0.00567617  |
| UPP1 | Cysteine and methionine metabolism      | LUAD | 0.159042204  |
| UPP1 | Cytokine induced killer cell            | LUAD | 0.025168664  |
| UPP1 | D-arginine and d-ornithine              | LUAD | -0.018242771 |
| UPP1 | D-glutamine and d-glutamate             | LUAD | 0.098597564  |
| UPP1 | Dendritic cell                          | LUAD | 0.225142708  |
| UPP1 | Dna_repair                              | LUAD | 0.221963817  |
| UPP1 | Dna_replication                         | LUAD | 0.193547334  |
| UPP1 | Double-negative memory t cell           | LUAD | -0.001924815 |
| UPP1 | Drug metabolism - cytochrome p450       | LUAD | -0.103006633 |
| UPP1 | Drug metabolism - other                 | LUAD | 0.20155628   |
| UPP1 | E2f_targets                             | LUAD | 0.090964301  |
| UPP1 | Ecm_receptor_interaction                | LUAD | 0.12212521   |
| UPP1 | Effector cd4+ memory t cell             | LUAD | 0.099288925  |
| UPP1 | Effector cd8+ memory t cell             | LUAD | 0.22355094   |
| UPP1 | Effector memory t cell                  | LUAD | 0.124682581  |
| UPP1 | Effector regulatory t (treg)            | LUAD | 0.166553492  |
| UPP1 | Elvidge_hif1a_targets_up                | LUAD | -0.030798156 |

|      |                              |      |              |
|------|------------------------------|------|--------------|
| UPP1 | Endothelial cell             | LUAD | 0.049240897  |
| UPP1 | Eosinophil                   | LUAD | 0.29065698   |
| UPP1 | Ether lipid metabolism       | LUAD | -0.006877082 |
| UPP1 | Exhausted cd4+ t cell        | LUAD | 0.280617043  |
| UPP1 | Exhausted cd8+ t cell        | LUAD | 0.312829931  |
| UPP1 | Exhausted t cell             | LUAD | 0.181078516  |
| UPP1 | Fat cell (adipocyte)         | LUAD | 0.076025558  |
| UPP1 | Fatty acid biosynthesis      | LUAD | -0.090382449 |
| UPP1 | Fatty acid degradation       | LUAD | -0.190125934 |
| UPP1 | Fatty acid elongation        | LUAD | 0.226504659  |
| UPP1 | Fibroblast                   | LUAD | 0.200445966  |
| UPP1 | Folate biosynthesis          | LUAD | -0.111665489 |
| UPP1 | Follicular b cell            | LUAD | 0.088591609  |
| UPP1 | Follicular dendritic cell    | LUAD | -0.016141815 |
| UPP1 | Follicular helper (tfh) t ce | LUAD | 0.169676619  |
| UPP1 | Follicular t cell            | LUAD | 0.230709135  |
| UPP1 | Foxp3+il-17+ t cell          | LUAD | 0.19560712   |
| UPP1 | Fructose and mannose me      | LUAD | 0.252709672  |
| UPP1 | G2m_checkpoint               | LUAD | -0.000602623 |
| UPP1 | Galactose metabolism         | LUAD | 0.400614824  |
| UPP1 | Galie_tumor_stemness_ge      | LUAD | 0.051262017  |
| UPP1 | Glutathione metabolism       | LUAD | 0.140428666  |
| UPP1 | Glycerolipid metabolism      | LUAD | -0.065725724 |
| UPP1 | Glycerophospholipid metæ     | LUAD | 0.012930777  |
| UPP1 | Glycine, serine and threor   | LUAD | 0.14514636   |
| UPP1 | Glycolysis / gluconeogene    | LUAD | 0.161735368  |
| UPP1 | Glycosaminoglycan biosy1     | LUAD | 0.264833031  |
| UPP1 | Glycosaminoglycan biosy1     | LUAD | -0.021374802 |
| UPP1 | Glycosaminoglycan biosy1     | LUAD | 0.212661819  |
| UPP1 | Glycosaminoglycan degra      | LUAD | 0.18086945   |
| UPP1 | Glycosphingolipid biosyn1    | LUAD | 0.125778477  |
| UPP1 | Glycosphingolipid biosyn1    | LUAD | 0.248121492  |
| UPP1 | Glycosphingolipid biosyn1    | LUAD | 0.19103135   |
| UPP1 | Glycosylphosphatidylinos     | LUAD | -0.092831696 |
| UPP1 | Glyoxylate and dicarboxy     | LUAD | -0.046275079 |
| UPP1 | Granulocyte                  | LUAD | 0.313128604  |
| UPP1 | Hedgehog_signaling           | LUAD | -0.140749844 |
| UPP1 | Histidine metabolism         | LUAD | -0.162604673 |
| UPP1 | Hypoxia                      | LUAD | 0.363590127  |
| UPP1 | Il-17ralpha t cell           | LUAD | 0.114596253  |
| UPP1 | Il2_stat5_signaling          | LUAD | 0.303502982  |
| UPP1 | Il6_jak_stat3_signaling      | LUAD | 0.374787118  |
| UPP1 | Immune_checkpoints_turr      | LUAD | 0.374931607  |

|      |                             |      |              |
|------|-----------------------------|------|--------------|
| UPP1 | Immune_inhibition_cytok     | LUAD | 0.365629814  |
| UPP1 | Inositol phosphate metabo   | LUAD | -0.242705874 |
| UPP1 | Interleukin_6_signaling     | LUAD | -0.084994096 |
| UPP1 | Jaeger_metastasis_up        | LUAD | 0.212059523  |
| UPP1 | Jain_nfkb_signaling         | LUAD | 0.037294787  |
| UPP1 | Kras_signaling_up           | LUAD | 0.280481667  |
| UPP1 | Linoleic acid metabolism    | LUAD | -0.0803542   |
| UPP1 | Lipoic acid metabolism      | LUAD | -0.00091271  |
| UPP1 | Lysine degradation          | LUAD | -0.369275975 |
| UPP1 | Lysosome                    | LUAD | 0.23661898   |
| UPP1 | M1 macrophage               | LUAD | 0.319513917  |
| UPP1 | M2 macrophage               | LUAD | 0.267644265  |
| UPP1 | Mannose type o-glycan bi    | LUAD | -0.055691847 |
| UPP1 | Mapk_signaling_pathway      | LUAD | 0.087308869  |
| UPP1 | Mapk3_erk1_activation       | LUAD | -0.016502095 |
| UPP1 | Marginal zone b cell        | LUAD | 0.027232304  |
| UPP1 | Memory b cell               | LUAD | 0.086844884  |
| UPP1 | Mesenchymal cell            | LUAD | 0.248421795  |
| UPP1 | Mesenchymal stem cell       | LUAD | 0.126936664  |
| UPP1 | Metabolism of xenobiotic    | LUAD | -0.070854678 |
| UPP1 | Migrating cancer stem cel   | LUAD | 0.19617476   |
| UPP1 | Mitotic_spindle             | LUAD | -0.12491581  |
| UPP1 | Monocyte                    | LUAD | 0.395993173  |
| UPP1 | Mtor_signaling_pathway      | LUAD | 0.034471665  |
| UPP1 | Mtorc1_signaling            | LUAD | 0.207165119  |
| UPP1 | Mucin type o-glycan biosy   | LUAD | 0.153897356  |
| UPP1 | Myc_targets_v1              | LUAD | 0.108568095  |
| UPP1 | Myeloid cell                | LUAD | 0.215070271  |
| UPP1 | N-glycan biosynthesis       | LUAD | 0.019856909  |
| UPP1 | Naive b cell                | LUAD | -0.068925629 |
| UPP1 | Naive cd4+ t cell           | LUAD | 0.034771539  |
| UPP1 | Naive cd8+ t cell           | LUAD | -0.08377183  |
| UPP1 | Natural killer cell         | LUAD | 0.201847742  |
| UPP1 | Natural killer t (nkt) cell | LUAD | 0.280357247  |
| UPP1 | Natural regulatory t (treg) | LUAD | 0.107493706  |
| UPP1 | Neomycin, kanamycin and     | LUAD | 0.150478382  |
| UPP1 | Neutrophil                  | LUAD | 0.399596866  |
| UPP1 | Nicotinate and nicotinami   | LUAD | 0.304418607  |
| UPP1 | Nitrogen metabolism         | LUAD | -0.235923221 |
| UPP1 | Nod_like_receptor_signal    | LUAD | 0.309701924  |
| UPP1 | Notch_signaling             | LUAD | 0.134222757  |
| UPP1 | One carbon pool by folate   | LUAD | -0.040193487 |
| UPP1 | Other glycan degradation    | LUAD | 0.089844902  |



|      |                                                   |      |              |
|------|---------------------------------------------------|------|--------------|
| UPP1 | Other types of o-glycan b                         | LUAD | 0.013973824  |
| UPP1 | Oxidative phosphorylation                         | LUAD | 0.223227021  |
| UPP1 | P53_pathway                                       | LUAD | 0.32174454   |
| UPP1 | P53_signaling_pathway                             | LUAD | 0.274808925  |
| UPP1 | Pantothenate and coa biosynthesis                 | LUAD | 0.02795007   |
| UPP1 | Pentose and glucuronate interconversions          | LUAD | -0.018049957 |
| UPP1 | Pentose phosphate pathway                         | LUAD | 0.234981791  |
| UPP1 | Pericyte                                          | LUAD | 0.124443406  |
| UPP1 | Phenylalanine metabolism                          | LUAD | -0.084383195 |
| UPP1 | Phenylalanine, tyrosine and tryptophan metabolism | LUAD | 0.00656985   |
| UPP1 | Phosphonate and phosphite metabolism              | LUAD | -0.056257121 |
| UPP1 | Pi3k_akt_activation                               | LUAD | 0.015683131  |
| UPP1 | Pi3k_akt_mtor_signaling                           | LUAD | 0.198043788  |
| UPP1 | Porphyrin and chlorophyll metabolism              | LUAD | 0.0187669    |
| UPP1 | Primary bile acid biosynthesis                    | LUAD | 0.142491871  |
| UPP1 | Propanoate metabolism                             | LUAD | -0.262789375 |
| UPP1 | Purine metabolism                                 | LUAD | 0.146725611  |
| UPP1 | Pyrimidine metabolism                             | LUAD | 0.293327982  |
| UPP1 | Pyruvate metabolism                               | LUAD | -0.096306691 |
| UPP1 | Regulation_of_autophagy                           | LUAD | 0.049412488  |
| UPP1 | Retinol metabolism                                | LUAD | -0.084390879 |
| UPP1 | Riboflavin metabolism                             | LUAD | 0.181399974  |
| UPP1 | Schmahl_pdgf_signaling                            | LUAD | 0.079023829  |
| UPP1 | Selenocompound metabolism                         | LUAD | -0.240788465 |
| UPP1 | Signaling_by_hippo                                | LUAD | -0.31372538  |
| UPP1 | Sphingolipid metabolism                           | LUAD | -0.018997864 |
| UPP1 | Starch and sucrose metabolism                     | LUAD | 0.21723239   |
| UPP1 | Steroid biosynthesis                              | LUAD | 0.04007449   |
| UPP1 | Steroid hormone biosynthesis                      | LUAD | -0.071203282 |
| UPP1 | Sulfur metabolism                                 | LUAD | 0.073386786  |
| UPP1 | Synthesis and degradation of ribonucleotides      | LUAD | -0.158607544 |
| UPP1 | T helper cell                                     | LUAD | 0.214973868  |
| UPP1 | T helper1 (th1) cell                              | LUAD | 0.318798408  |
| UPP1 | T helper17 (th17) cell                            | LUAD | 0.24100308   |
| UPP1 | T helper2 (th2) cell                              | LUAD | 0.208714366  |
| UPP1 | T helper9 (th9) cell                              | LUAD | 0.108581214  |
| UPP1 | Taurine and hypotaurine metabolism                | LUAD | -0.180146371 |
| UPP1 | Terpenoid backbone biosynthesis                   | LUAD | -0.073562352 |
| UPP1 | Tgf_beta_signaling_pathway                        | LUAD | -0.182175334 |
| UPP1 | Thiamine metabolism                               | LUAD | -0.01194509  |
| UPP1 | Tnfa_signaling_via_nfkappaB                       | LUAD | 0.375704962  |
| UPP1 | Tryptophan metabolism                             | LUAD | -0.048955593 |
| UPP1 | Tumor endothelial cell                            | LUAD | 0.322718445  |

|      |                            |      |              |
|------|----------------------------|------|--------------|
| UPP1 | Tyrosine metabolism        | LUAD | -0.02771273  |
| UPP1 | Ubiquinone and other ter   | LUAD | 0.09798515   |
| UPP1 | Valine, leucine and isoleu | LUAD | 0.270671869  |
| UPP1 | Valine, leucine and isoleu | LUAD | -0.186359704 |
| UPP1 | Vascular endothelial cell  | LUAD | -0.079637594 |
| UPP1 | Vascular smooth muscle c   | LUAD | -0.089592908 |
| UPP1 | Vegf_signaling_pathway     | LUAD | 0.104302499  |
| UPP1 | Vitamin b6 metabolism      | LUAD | 0.133261389  |
| UPP1 | Willert_wnt_signaling      | LUAD | 0.099654164  |
| UPP1 | Wnt_beta_catenin_signali   | LUAD | -0.313426765 |
| UPP2 | Abnormal plasma cell       | LUAD | -0.051105646 |
| UPP2 | Activated b cell           | LUAD | -0.004226987 |
| UPP2 | Activated cd4+ t cell      | LUAD | 0.020380309  |
| UPP2 | Activated t cell           | LUAD | -0.047680188 |
| UPP2 | Alanine, aspartate and glu | LUAD | -0.181790236 |
| UPP2 | Alcala_apoptosis           | LUAD | -0.220367225 |
| UPP2 | Alpha-linolenic acid meta  | LUAD | 0.137720397  |
| UPP2 | Amino sugar and nucleoti   | LUAD | -0.082995104 |
| UPP2 | Ampk_pathway               | LUAD | -0.175117573 |
| UPP2 | Angiogenesis               | LUAD | -0.016502338 |
| UPP2 | Arachidonic acid metaboli  | LUAD | 0.196379044  |
| UPP2 | Arginine and proline met&  | LUAD | -0.147760468 |
| UPP2 | Arginine biosynthesis      | LUAD | -0.117310894 |
| UPP2 | Ascorbate and aldarate m&  | LUAD | 0.046159076  |
| UPP2 | Atypical memory b cell     | LUAD | 0.123282894  |
| UPP2 | Axl+siglec6+ dendritic ce  | LUAD | 0.115806928  |
| UPP2 | B cell                     | LUAD | 0.076838895  |
| UPP2 | B1 cell                    | LUAD | -0.013404596 |
| UPP2 | Basal cell                 | LUAD | 0.043011105  |
| UPP2 | Beta-alanine metabolism    | LUAD | -0.037006443 |
| UPP2 | Biosynthesis of unsaturate | LUAD | -0.124837656 |
| UPP2 | Biotin metabolism          | LUAD | -0.056558502 |
| UPP2 | Butanoate metabolism       | LUAD | -0.022743413 |
| UPP2 | Caffeine metabolism        | LUAD | 0.178846388  |
| UPP2 | Cancer stem cell           | LUAD | 0.060046065  |
| UPP2 | Cancer stem-like cell      | LUAD | 0.124167783  |
| UPP2 | Cd4+ cytotoxic t cell      | LUAD | -0.018108663 |
| UPP2 | Cd4+ memory t cell         | LUAD | 0.03636254   |
| UPP2 | Cd4+ regulatory t cell     | LUAD | -0.011972423 |
| UPP2 | Cd4+ t helper cell         | LUAD | 0.019385786  |
| UPP2 | Cd4+cd25+ regulatory t c   | LUAD | -0.002056498 |
| UPP2 | Cd8+ cytotoxic t cell      | LUAD | -0.086426655 |
| UPP2 | Cd8+ regulatory t cell     | LUAD | -0.079522694 |

|      |                              |       |              |
|------|------------------------------|-------|--------------|
| UPP2 | Cell_cycle                   | LUAD  | -0.207824446 |
| UPP2 | Chandran_metastasis_top      | LUAD  | -0.244293552 |
| UPP2 | Citrate cycle (tca cycle)    | LUAD  | -0.2135667   |
| UPP2 | Cysteine and methionine r    | LUAD  | -0.193361665 |
| UPP2 | Cytokine induced killer c    | LUAD  | -0.034404888 |
| UPP2 | D-arginine and d-ornithin    | LUAD  | 0.009425939  |
| UPP2 | D-glutamine and d-glutan     | LUAD  | -0.001725625 |
| UPP2 | Dendritic cell               | LUAD  | 0.05009376   |
| UPP2 | Dna_repair                   | LUAD  | -0.134388282 |
| UPP2 | Dna_replication              | LUAD  | -0.168029374 |
| UPP2 | Double-negative memory       | LUAD  | 0.035706185  |
| UPP2 | Drug metabolism - cytoch     | LUAD  | 0.18144041   |
| UPP2 | Drug metabolism - other      | LUAD  | 0.061314001  |
| UPP2 | E2f_targets                  | LUAD  | -0.21640964  |
| UPP2 | Ecm_receptor_interaction     | LUAD  | 0.024768632  |
| UPP2 | Effector cd4+ memory t       | (LUAD | 0.066939298  |
| UPP2 | Effector cd8+ memory t       | (LUAD | 0.01688109   |
| UPP2 | Effector memory t cell       | LUAD  | 0.024052245  |
| UPP2 | Effector regulatory t (treg  | LUAD  | 0.014123578  |
| UPP2 | Elvidge_hif1a_targets_up     | LUAD  | -0.255261524 |
| UPP2 | Endothelial cell             | LUAD  | -0.063544486 |
| UPP2 | Eosinophil                   | LUAD  | 0.051976777  |
| UPP2 | Ether lipid metabolism       | LUAD  | 0.107693803  |
| UPP2 | Exhausted cd4+ t cell        | LUAD  | -0.02351257  |
| UPP2 | Exhausted cd8+ t cell        | LUAD  | 0.011353567  |
| UPP2 | Exhausted t cell             | LUAD  | -0.05599154  |
| UPP2 | Fat cell (adipocyte)         | LUAD  | -0.084403927 |
| UPP2 | Fatty acid biosynthesis      | LUAD  | -0.061574151 |
| UPP2 | Fatty acid degradation       | LUAD  | 0.052828171  |
| UPP2 | Fatty acid elongation        | LUAD  | -0.114373479 |
| UPP2 | Fibroblast                   | LUAD  | 0.103116447  |
| UPP2 | Folate biosynthesis          | LUAD  | -0.135538593 |
| UPP2 | Follicular b cell            | LUAD  | 0.057346154  |
| UPP2 | Follicular dendritic cell    | LUAD  | 0.005354059  |
| UPP2 | Follicular helper (tfh) t ce | LUAD  | 0.009348427  |
| UPP2 | Follicular t cell            | LUAD  | -0.109821343 |
| UPP2 | Foxp3+il-17+ t cell          | LUAD  | -0.035596287 |
| UPP2 | Fructose and mannose me      | LUAD  | -0.051822386 |
| UPP2 | G2m_checkpoint               | LUAD  | -0.247237159 |
| UPP2 | Galactose metabolism         | LUAD  | -0.101900045 |
| UPP2 | Galie_tumor_stemness_ge      | LUAD  | 0.12980148   |
| UPP2 | Glutathione metabolism       | LUAD  | -0.036192682 |
| UPP2 | Glycerolipid metabolism      | LUAD  | -0.000398143 |

|      |                                          |      |              |
|------|------------------------------------------|------|--------------|
| UPP2 | Glycerophospholipid metabolism           | LUAD | 0.085832879  |
| UPP2 | Glycine, serine and threonine metabolism | LUAD | -0.028485489 |
| UPP2 | Glycolysis / gluconeogenesis             | LUAD | -0.097384088 |
| UPP2 | Glycosaminoglycan biosynthesis           | LUAD | 0.012228566  |
| UPP2 | Glycosaminoglycan biosynthesis           | LUAD | 0.037201101  |
| UPP2 | Glycosaminoglycan biosynthesis           | LUAD | 0.023351379  |
| UPP2 | Glycosaminoglycan degradation            | LUAD | 0.07737546   |
| UPP2 | Glycosphingolipid biosynthesis           | LUAD | 0.023610951  |
| UPP2 | Glycosphingolipid biosynthesis           | LUAD | 0.029658318  |
| UPP2 | Glycosphingolipid biosynthesis           | LUAD | 0.064391691  |
| UPP2 | Glycosylphosphatidylinositol signaling   | LUAD | -0.060752181 |
| UPP2 | Glyoxylate and dicarboxylate metabolism  | LUAD | -0.146952637 |
| UPP2 | Granulocyte                              | LUAD | 0.040761569  |
| UPP2 | Hedgehog signaling                       | LUAD | 0.034076319  |
| UPP2 | Histidine metabolism                     | LUAD | 0.054928597  |
| UPP2 | Hypoxia                                  | LUAD | -0.093959854 |
| UPP2 | IL-17 receptor signaling                 | LUAD | -0.029081908 |
| UPP2 | IL2/STAT5 signaling                      | LUAD | -0.018582451 |
| UPP2 | IL6/JAK/STAT3 signaling                  | LUAD | 0.019961711  |
| UPP2 | Immune checkpoints                       | LUAD | 0.047629088  |
| UPP2 | Immune inhibition                        | LUAD | 0.033649714  |
| UPP2 | Inositol phosphate metabolism            | LUAD | -0.097475432 |
| UPP2 | Interleukin_6 signaling                  | LUAD | -0.121950109 |
| UPP2 | Jaeger metastasis up                     | LUAD | -0.151280126 |
| UPP2 | Jain_nfkB signaling                      | LUAD | -0.294625059 |
| UPP2 | Kras signaling up                        | LUAD | 0.057559977  |
| UPP2 | Linoleic acid metabolism                 | LUAD | 0.177975822  |
| UPP2 | Lipoic acid metabolism                   | LUAD | 0.051100146  |
| UPP2 | Lysine degradation                       | LUAD | -0.181727313 |
| UPP2 | Lysosome                                 | LUAD | 0.069070124  |
| UPP2 | M1 macrophage                            | LUAD | 0.034114433  |
| UPP2 | M2 macrophage                            | LUAD | 0.02351671   |
| UPP2 | Mannose type o-glycan biosynthesis       | LUAD | 0.010727853  |
| UPP2 | Mapk signaling pathway                   | LUAD | -0.028646271 |
| UPP2 | Mapk3_erk1 activation                    | LUAD | -0.158832543 |
| UPP2 | Marginal zone b cell                     | LUAD | 0.04550755   |
| UPP2 | Memory b cell                            | LUAD | 0.060229907  |
| UPP2 | Mesenchymal cell                         | LUAD | 0.079658148  |
| UPP2 | Mesenchymal stem cell                    | LUAD | 0.075647055  |
| UPP2 | Metabolism of xenobiotics                | LUAD | 0.148478348  |
| UPP2 | Migrating cancer stem cell               | LUAD | 0.023103565  |
| UPP2 | Mitotic spindle                          | LUAD | -0.218643438 |
| UPP2 | Monocyte                                 | LUAD | 0.036918951  |

|      |                                          |      |              |
|------|------------------------------------------|------|--------------|
| UPP2 | Mtor_signaling_pathway                   | LUAD | -0.07970753  |
| UPP2 | Mtorc1_signaling                         | LUAD | -0.236797722 |
| UPP2 | Mucin type o-glycan biosynthesis         | LUAD | 0.061693289  |
| UPP2 | Myc_targets_v1                           | LUAD | -0.207143937 |
| UPP2 | Myeloid cell                             | LUAD | 0.024226882  |
| UPP2 | N-glycan biosynthesis                    | LUAD | -0.197599474 |
| UPP2 | Naive b cell                             | LUAD | 0.047372426  |
| UPP2 | Naive cd4+ t cell                        | LUAD | 0.039105361  |
| UPP2 | Naive cd8+ t cell                        | LUAD | 0.082889561  |
| UPP2 | Natural killer cell                      | LUAD | -0.03665661  |
| UPP2 | Natural killer t (nkt) cell              | LUAD | -0.104022063 |
| UPP2 | Natural regulatory t (treg) cell         | LUAD | 0.022925343  |
| UPP2 | Neomycin, kanamycin and streptomycin     | LUAD | -0.064453576 |
| UPP2 | Neutrophil                               | LUAD | 0.030616069  |
| UPP2 | Nicotinate and nicotinamide              | LUAD | 0.110769456  |
| UPP2 | Nitrogen metabolism                      | LUAD | -0.015459097 |
| UPP2 | Nod_like_receptor_signaling              | LUAD | -0.000811069 |
| UPP2 | Notch_signaling                          | LUAD | 0.091911757  |
| UPP2 | One carbon pool by folate                | LUAD | -0.175172492 |
| UPP2 | Other glycan degradation                 | LUAD | 0.069843183  |
| UPP2 | Other types of o-glycan biosynthesis     | LUAD | 0.014461389  |
| UPP2 | Oxidative phosphorylation                | LUAD | -0.053637955 |
| UPP2 | P53_pathway                              | LUAD | 0.034178382  |
| UPP2 | P53_signaling_pathway                    | LUAD | -0.046482038 |
| UPP2 | Pantothenate and coenzyme a biosynthesis | LUAD | 0.065828357  |
| UPP2 | Pentose and glucuronate interconversions | LUAD | 0.037007265  |
| UPP2 | Pentose phosphate pathway                | LUAD | -0.136018668 |
| UPP2 | Pericyte                                 | LUAD | 0.083691781  |
| UPP2 | Phenylalanine metabolism                 | LUAD | -0.080900681 |
| UPP2 | Phenylalanine, tyrosine and tryptophan   | LUAD | -0.122467043 |
| UPP2 | Phosphonate and phosphite metabolism     | LUAD | -0.029257261 |
| UPP2 | Pi3k_akt_activation                      | LUAD | -0.108726466 |
| UPP2 | Pi3k_akt_mtor_signaling                  | LUAD | -0.266164727 |
| UPP2 | Porphyrin and chlorophyll metabolism     | LUAD | 0.004687181  |
| UPP2 | Primary bile acid biosynthesis           | LUAD | 0.224501773  |
| UPP2 | Propanoate metabolism                    | LUAD | -0.096782694 |
| UPP2 | Purine metabolism                        | LUAD | -0.195982465 |
| UPP2 | Pyrimidine metabolism                    | LUAD | -0.139578614 |
| UPP2 | Pyruvate metabolism                      | LUAD | -0.154826526 |
| UPP2 | Regulation_of_autophagy                  | LUAD | -0.110612899 |
| UPP2 | Retinol metabolism                       | LUAD | 0.176704052  |
| UPP2 | Riboflavin metabolism                    | LUAD | -0.081456737 |
| UPP2 | Schmahl_pdgf_signaling                   | LUAD | -0.017060231 |

|      |                            |      |              |
|------|----------------------------|------|--------------|
| UPP2 | Selenocompound metabol     | LUAD | -0.165544061 |
| UPP2 | Signaling_by_hippo         | LUAD | -0.050015424 |
| UPP2 | Sphingolipid metabolism    | LUAD | -0.092885334 |
| UPP2 | Starch and sucrose metabo  | LUAD | -0.01017109  |
| UPP2 | Steroid biosynthesis       | LUAD | -0.05610708  |
| UPP2 | Steroid hormone biosynth   | LUAD | 0.110223532  |
| UPP2 | Sulfur metabolism          | LUAD | -0.021055062 |
| UPP2 | Synthesis and degradation  | LUAD | 0.042757132  |
| UPP2 | T helper cell              | LUAD | 0.049840851  |
| UPP2 | T helper1 (th1) cell       | LUAD | -0.030346124 |
| UPP2 | T helper17 (th17) cell     | LUAD | 0.012959781  |
| UPP2 | T helper2 (th2) cell       | LUAD | 0.018282062  |
| UPP2 | T helper9 (th9) cell       | LUAD | -0.00793314  |
| UPP2 | Taurine and hypotaurine r  | LUAD | 0.210914012  |
| UPP2 | Terpenoid backbone biosy   | LUAD | -0.162133214 |
| UPP2 | Tgf_beta_signaling_pathw   | LUAD | -0.03272472  |
| UPP2 | Thiamine metabolism        | LUAD | 0.037382669  |
| UPP2 | Tnfa_signaling_via_nfbk    | LUAD | -0.012550658 |
| UPP2 | Tryptophan metabolism      | LUAD | -0.030501102 |
| UPP2 | Tumor endothelial cell     | LUAD | -0.034712643 |
| UPP2 | Tyrosine metabolism        | LUAD | 0.083645745  |
| UPP2 | Ubiquinone and other ter   | LUAD | -0.012745483 |
| UPP2 | Valine, leucine and isoleu | LUAD | -0.070926324 |
| UPP2 | Valine, leucine and isoleu | LUAD | -0.038593371 |
| UPP2 | Vascular endothelial cell  | LUAD | -0.071086287 |
| UPP2 | Vascular smooth muscle c   | LUAD | 0.105367673  |
| UPP2 | Vegf_signaling_pathway     | LUAD | -0.03567463  |
| UPP2 | Vitamin b6 metabolism      | LUAD | -0.097293174 |
| UPP2 | Willert_wnt_signaling      | LUAD | -0.181146626 |
| UPP2 | Wnt_beta_catenin_signali   | LUAD | -0.059166406 |
| CDA  | Abnormal plasma cell       | LUSC | -0.011967063 |
| CDA  | Activated b cell           | LUSC | 0.170316439  |
| CDA  | Activated cd4+ t cell      | LUSC | 0.200898483  |
| CDA  | Activated t cell           | LUSC | 0.177698972  |
| CDA  | Alanine, aspartate and glu | LUSC | -0.014406644 |
| CDA  | Alcala_apoptosis           | LUSC | 0.168143748  |
| CDA  | Alpha-linolenic acid meta  | LUSC | 0.114049508  |
| CDA  | Amino sugar and nucleoti   | LUSC | 0.2008689    |
| CDA  | Ampk_pathway               | LUSC | -0.17669152  |
| CDA  | Angiogenesis               | LUSC | 0.287791409  |
| CDA  | Arachidonic acid metabo    | LUSC | 0.137982584  |
| CDA  | Arginine and proline met   | LUSC | 0.07048195   |
| CDA  | Arginine biosynthesis      | LUSC | 0.096070631  |

|     |                             |      |              |
|-----|-----------------------------|------|--------------|
| CDA | Ascorbate and aldarate me   | LUSC | -0.252830508 |
| CDA | Atypical memory b cell      | LUSC | 0.142601414  |
| CDA | Axl+siglec6+ dendritic ce   | LUSC | 0.258230645  |
| CDA | B cell                      | LUSC | 0.161926474  |
| CDA | B1 cell                     | LUSC | 0.110582791  |
| CDA | Basal cell                  | LUSC | 0.001693539  |
| CDA | Beta-alanine metabolism     | LUSC | 0.093233022  |
| CDA | Biosynthesis of unsaturate  | LUSC | 0.074132642  |
| CDA | Biotin metabolism           | LUSC | 0.054764297  |
| CDA | Butanoate metabolism        | LUSC | -0.234250806 |
| CDA | Caffeine metabolism         | LUSC | 0.116277776  |
| CDA | Cancer stem cell            | LUSC | 0.191304402  |
| CDA | Cancer stem-like cell       | LUSC | 0.145147154  |
| CDA | Cd4+ cytotoxic t cell       | LUSC | 0.280522408  |
| CDA | Cd4+ memory t cell          | LUSC | 0.150332363  |
| CDA | Cd4+ regulatory t cell      | LUSC | 0.198541895  |
| CDA | Cd4+ t helper cell          | LUSC | 0.198183748  |
| CDA | Cd4+cd25+ regulatory t c    | LUSC | 0.198116864  |
| CDA | Cd8+ cytotoxic t cell       | LUSC | 0.173549278  |
| CDA | Cd8+ regulatory t cell      | LUSC | 0.181591687  |
| CDA | Cell_cycle                  | LUSC | -0.220376663 |
| CDA | Chandran_metastasis_top5    | LUSC | -0.225869853 |
| CDA | Citrate cycle (tca cycle)   | LUSC | 0.009666386  |
| CDA | Cysteine and methionine r   | LUSC | -0.063828185 |
| CDA | Cytokine induced killer c   | LUSC | 0.146533318  |
| CDA | D-arginine and d-ornithin   | LUSC | 0.083334472  |
| CDA | D-glutamine and d-glutan    | LUSC | 0.014459488  |
| CDA | Dendritic cell              | LUSC | 0.286014163  |
| CDA | Dna_repair                  | LUSC | -0.079928949 |
| CDA | Dna_replication             | LUSC | -0.184953171 |
| CDA | Double-negative memory      | LUSC | 0.096086293  |
| CDA | Drug metabolism - cytoch    | LUSC | -0.190752588 |
| CDA | Drug metabolism - other     | LUSC | -0.044306737 |
| CDA | E2f_targets                 | LUSC | -0.214830398 |
| CDA | Ecm_receptor_interaction    | LUSC | 0.236368599  |
| CDA | Effector cd4+ memory t (    | LUSC | 0.154392987  |
| CDA | Effector cd8+ memory t (    | LUSC | 0.295976773  |
| CDA | Effector memory t cell      | LUSC | 0.178241038  |
| CDA | Effector regulatory t (treg | LUSC | 0.217320679  |
| CDA | Elvidge_hif1a_targets_up    | LUSC | 0.02725896   |
| CDA | Endothelial cell            | LUSC | 0.210007146  |
| CDA | Eosinophil                  | LUSC | 0.255700233  |
| CDA | Ether lipid metabolism      | LUSC | 0.152215424  |

|     |                              |      |              |
|-----|------------------------------|------|--------------|
| CDA | Exhausted cd4+ t cell        | LUSC | 0.248791213  |
| CDA | Exhausted cd8+ t cell        | LUSC | 0.267381434  |
| CDA | Exhausted t cell             | LUSC | 0.190550755  |
| CDA | Fat cell (adipocyte)         | LUSC | 0.090170429  |
| CDA | Fatty acid biosynthesis      | LUSC | 0.102147241  |
| CDA | Fatty acid degradation       | LUSC | -0.151422795 |
| CDA | Fatty acid elongation        | LUSC | 0.097064621  |
| CDA | Fibroblast                   | LUSC | 0.286934071  |
| CDA | Folate biosynthesis          | LUSC | 0.040576363  |
| CDA | Follicular b cell            | LUSC | 0.124987585  |
| CDA | Follicular dendritic cell    | LUSC | 0.097089869  |
| CDA | Follicular helper (tfh) t ce | LUSC | 0.218609182  |
| CDA | Follicular t cell            | LUSC | 0.176469436  |
| CDA | Foxp3+il-17+ t cell          | LUSC | 0.131066118  |
| CDA | Fructose and mannose me      | LUSC | 0.069777009  |
| CDA | G2m_checkpoint               | LUSC | -0.217506434 |
| CDA | Galactose metabolism         | LUSC | 0.1760939    |
| CDA | Galie_tumor_stemness_ge      | LUSC | 0.191421198  |
| CDA | Glutathione metabolism       | LUSC | -0.026946535 |
| CDA | Glycerolipid metabolism      | LUSC | 0.083593998  |
| CDA | Glycerophospholipid metæ     | LUSC | -0.004545493 |
| CDA | Glycine, serine and threor   | LUSC | 0.015320555  |
| CDA | Glycolysis / gluconeogene    | LUSC | 0.026408931  |
| CDA | Glycosaminoglycan biosy      | LUSC | 0.235675478  |
| CDA | Glycosaminoglycan biosy      | LUSC | -0.025107098 |
| CDA | Glycosaminoglycan biosy      | LUSC | 0.135232609  |
| CDA | Glycosaminoglycan degra      | LUSC | 0.248084378  |
| CDA | Glycosphingolipid biosyn     | LUSC | 0.280459403  |
| CDA | Glycosphingolipid biosyn     | LUSC | 0.282608083  |
| CDA | Glycosphingolipid biosyn     | LUSC | -0.000450005 |
| CDA | Glycosylphosphatidylinos     | LUSC | -0.256869853 |
| CDA | Glyoxylate and dicarboxy     | LUSC | -0.104695391 |
| CDA | Granulocyte                  | LUSC | 0.280394046  |
| CDA | Hedgehog_signaling           | LUSC | 0.037917013  |
| CDA | Histidine metabolism         | LUSC | 0.141101003  |
| CDA | Hypoxia                      | LUSC | 0.23463107   |
| CDA | Il-17ralpha t cell           | LUSC | 0.207788392  |
| CDA | Il2_stat5_signaling          | LUSC | 0.300906852  |
| CDA | Il6_jak_stat3_signaling      | LUSC | 0.28889341   |
| CDA | Immune_checkpoints_tur       | LUSC | 0.220386727  |
| CDA | Immune_inhibition_cytok      | LUSC | 0.284549506  |
| CDA | Inositol phosphate metabo    | LUSC | -0.062661877 |
| CDA | Interleukin_6_signaling      | LUSC | 0.084788867  |



|     |                             |      |              |
|-----|-----------------------------|------|--------------|
| CDA | Jaeger_metastasis_up        | LUSC | -0.003383635 |
| CDA | Jain_nfkb_signaling         | LUSC | -0.134339579 |
| CDA | Kras_signaling_up           | LUSC | 0.304800334  |
| CDA | Linoleic acid metabolism    | LUSC | -0.018036769 |
| CDA | Lipoic acid metabolism      | LUSC | -0.182305798 |
| CDA | Lysine degradation          | LUSC | -0.301499483 |
| CDA | Lysosome                    | LUSC | 0.285551004  |
| CDA | M1 macrophage               | LUSC | 0.255152154  |
| CDA | M2 macrophage               | LUSC | 0.27617509   |
| CDA | Mannose type o-glycan bi    | LUSC | -0.154194867 |
| CDA | Mapk_signaling_pathway      | LUSC | 0.186866279  |
| CDA | Mapk3_erk1_activation       | LUSC | 0.119870364  |
| CDA | Marginal zone b cell        | LUSC | 0.129508277  |
| CDA | Memory b cell               | LUSC | 0.092641454  |
| CDA | Mesenchymal cell            | LUSC | 0.289335817  |
| CDA | Mesenchymal stem cell       | LUSC | 0.256030986  |
| CDA | Metabolism of xenobiotic    | LUSC | -0.146079021 |
| CDA | Migrating cancer stem cel   | LUSC | 0.162766108  |
| CDA | Mitotic_spindle             | LUSC | -0.092483196 |
| CDA | Monocyte                    | LUSC | 0.358728653  |
| CDA | Mtor_signaling_pathway      | LUSC | -0.0462728   |
| CDA | Mtorc1_signaling            | LUSC | 0.036963749  |
| CDA | Mucin type o-glycan biosy   | LUSC | 0.122285624  |
| CDA | Myc_targets_v1              | LUSC | -0.086246796 |
| CDA | Myeloid cell                | LUSC | 0.221810707  |
| CDA | N-glycan biosynthesis       | LUSC | 0.040721064  |
| CDA | Naive b cell                | LUSC | 0.032950503  |
| CDA | Naive cd4+ t cell           | LUSC | 0.152648374  |
| CDA | Naive cd8+ t cell           | LUSC | 0.102069294  |
| CDA | Natural killer cell         | LUSC | 0.236641581  |
| CDA | Natural killer t (nkt) cell | LUSC | 0.097281504  |
| CDA | Natural regulatory t (treg) | LUSC | 0.143312303  |
| CDA | Neomycin, kanamycin and     | LUSC | 0.199182806  |
| CDA | Neutrophil                  | LUSC | 0.358994752  |
| CDA | Nicotinate and nicotinami   | LUSC | 0.129205083  |
| CDA | Nitrogen metabolism         | LUSC | 0.01855182   |
| CDA | Nod_like_receptor_signal    | LUSC | 0.270970868  |
| CDA | Notch_signaling             | LUSC | 0.12123687   |
| CDA | One carbon pool by folate   | LUSC | -0.105911522 |
| CDA | Other glycan degradation    | LUSC | 0.170654673  |
| CDA | Other types of o-glycan b   | LUSC | 0.020111416  |
| CDA | Oxidative phosphorylatior   | LUSC | 0.022400889  |
| CDA | P53_pathway                 | LUSC | 0.190718962  |

|     |                            |      |              |
|-----|----------------------------|------|--------------|
| CDA | P53_signaling_pathway      | LUSC | -0.022864217 |
| CDA | Pantothenate and coa bios  | LUSC | 0.017362009  |
| CDA | Pentose and glucuronate i  | LUSC | -0.180293443 |
| CDA | Pentose phosphate pathwa   | LUSC | 0.011389967  |
| CDA | Pericyte                   | LUSC | 0.314988328  |
| CDA | Phenylalanine metabolism   | LUSC | 0.141224894  |
| CDA | Phenylalanine, tyrosine ar | LUSC | 0.031379502  |
| CDA | Phosphonate and phosphir   | LUSC | -0.243230174 |
| CDA | Pi3k_akt_activation        | LUSC | -0.020206891 |
| CDA | Pi3k_akt_mtor_signaling    | LUSC | 0.035716192  |
| CDA | Porphyrin and chlorophyl   | LUSC | -0.138129424 |
| CDA | Primary bile acid biosynt  | LUSC | 0.14448841   |
| CDA | Propanoate metabolism      | LUSC | -0.166600845 |
| CDA | Purine metabolism          | LUSC | -0.019163217 |
| CDA | Pyrimidine metabolism      | LUSC | -0.03933788  |
| CDA | Pyruvate metabolism        | LUSC | -0.057363368 |
| CDA | Regulation_of_autophagy    | LUSC | -0.104414693 |
| CDA | Retinol metabolism         | LUSC | -0.135503582 |
| CDA | Riboflavin metabolism      | LUSC | 0.184585126  |
| CDA | Schmahl_pdgf_signaling     | LUSC | 0.179690018  |
| CDA | Selenocompound metabol     | LUSC | -0.195805727 |
| CDA | Signaling_by_hippo         | LUSC | 0.055578576  |
| CDA | Sphingolipid metabolism    | LUSC | 0.185537759  |
| CDA | Starch and sucrose metabo  | LUSC | 0.104463247  |
| CDA | Steroid biosynthesis       | LUSC | -0.025924439 |
| CDA | Steroid hormone biosynth   | LUSC | -0.151740156 |
| CDA | Sulfur metabolism          | LUSC | 0.064521877  |
| CDA | Synthesis and degradation  | LUSC | -0.186991518 |
| CDA | T helper cell              | LUSC | 0.256363475  |
| CDA | T helper1 (th1) cell       | LUSC | 0.288990129  |
| CDA | T helper17 (th17) cell     | LUSC | 0.282132345  |
| CDA | T helper2 (th2) cell       | LUSC | 0.239242803  |
| CDA | T helper9 (th9) cell       | LUSC | 0.198392729  |
| CDA | Taurine and hypotaurine r  | LUSC | -0.092347893 |
| CDA | Terpenoid backbone biosy   | LUSC | -0.028364871 |
| CDA | Tgf_beta_signaling_pathw   | LUSC | 0.052047243  |
| CDA | Thiamine metabolism        | LUSC | 0.142281239  |
| CDA | Tnfa_signaling_via_nfbk    | LUSC | 0.292980935  |
| CDA | Tryptophan metabolism      | LUSC | 0.007343073  |
| CDA | Tumor endothelial cell     | LUSC | 0.273800951  |
| CDA | Tyrosine metabolism        | LUSC | 0.037169831  |
| CDA | Ubiquinone and other ter   | LUSC | -0.01076795  |
| CDA | Valine, leucine and isoleu | LUSC | 0.273854881  |

|      |                            |      |              |
|------|----------------------------|------|--------------|
| CDA  | Valine, leucine and isoleu | LUSC | -0.161772442 |
| CDA  | Vascular endothelial cell  | LUSC | 0.245937825  |
| CDA  | Vascular smooth muscle c   | LUSC | 0.163717198  |
| CDA  | Vegf_signaling_pathway     | LUSC | 0.119254715  |
| CDA  | Vitamin b6 metabolism      | LUSC | 0.016348647  |
| CDA  | Willert_wnt_signaling      | LUSC | 0.079689309  |
| CDA  | Wnt_beta_catenin_signali   | LUSC | -0.072976677 |
| UCK1 | Abnormal plasma cell       | LUSC | 0.065656489  |
| UCK1 | Activated b cell           | LUSC | -0.037793778 |
| UCK1 | Activated cd4+ t cell      | LUSC | -0.041037411 |
| UCK1 | Activated t cell           | LUSC | -0.026944155 |
| UCK1 | Alanine, aspartate and glu | LUSC | -0.080870428 |
| UCK1 | Alcala_apoptosis           | LUSC | 0.042548216  |
| UCK1 | Alpha-linolenic acid meta  | LUSC | -0.097736082 |
| UCK1 | Amino sugar and nucleoti   | LUSC | -0.079911948 |
| UCK1 | Ampk_pathway               | LUSC | 0.062935972  |
| UCK1 | Angiogenesis               | LUSC | -0.271514251 |
| UCK1 | Arachidonic acid metabol   | LUSC | -0.040443349 |
| UCK1 | Arginine and proline metæ  | LUSC | -0.100006382 |
| UCK1 | Arginine biosynthesis      | LUSC | -0.099300381 |
| UCK1 | Ascorbate and aldarate me  | LUSC | -0.027645136 |
| UCK1 | Atypical memory b cell     | LUSC | -0.054203247 |
| UCK1 | Axl+siglec6+ dendritic ce  | LUSC | -0.015242196 |
| UCK1 | B cell                     | LUSC | -0.09545193  |
| UCK1 | B1 cell                    | LUSC | -0.023102262 |
| UCK1 | Basal cell                 | LUSC | -0.124755017 |
| UCK1 | Beta-alanine metabolism    | LUSC | -0.153306994 |
| UCK1 | Biosynthesis of unsaturate | LUSC | -0.012230027 |
| UCK1 | Biotin metabolism          | LUSC | 0.009159642  |
| UCK1 | Butanoate metabolism       | LUSC | 0.008249685  |
| UCK1 | Caffeine metabolism        | LUSC | -0.172185941 |
| UCK1 | Cancer stem cell           | LUSC | -0.167160572 |
| UCK1 | Cancer stem-like cell      | LUSC | -0.03845718  |
| UCK1 | Cd4+ cytotoxic t cell      | LUSC | -2.66E-06    |
| UCK1 | Cd4+ memory t cell         | LUSC | -0.073951632 |
| UCK1 | Cd4+ regulatory t cell     | LUSC | -0.025075726 |
| UCK1 | Cd4+ t helper cell         | LUSC | -0.008729254 |
| UCK1 | Cd4+cd25+ regulatory t c   | LUSC | -0.008159978 |
| UCK1 | Cd8+ cytotoxic t cell      | LUSC | 0.030231421  |
| UCK1 | Cd8+ regulatory t cell     | LUSC | 0.050875029  |
| UCK1 | Cell_cycle                 | LUSC | 0.132014071  |
| UCK1 | Chandran_metastasis_topç   | LUSC | -0.007016606 |
| UCK1 | Citrate cycle (tca cycle)  | LUSC | -0.015864695 |

|      |                              |      |              |
|------|------------------------------|------|--------------|
| UCK1 | Cysteine and methionine r    | LUSC | -0.055902983 |
| UCK1 | Cytokine induced killer c    | LUSC | 0.089522845  |
| UCK1 | D-arginine and d-ornithin    | LUSC | 0.013827234  |
| UCK1 | D-glutamine and d-glutan     | LUSC | -0.035534116 |
| UCK1 | Dendritic cell               | LUSC | -0.102885514 |
| UCK1 | Dna_repair                   | LUSC | 0.164711119  |
| UCK1 | Dna_replication              | LUSC | 0.201318243  |
| UCK1 | Double-negative memory       | LUSC | -0.024228022 |
| UCK1 | Drug metabolism - cytoch     | LUSC | -0.062793987 |
| UCK1 | Drug metabolism - other c    | LUSC | 0.021156323  |
| UCK1 | E2f_targets                  | LUSC | 0.100556993  |
| UCK1 | Ecm_receptor_interaction     | LUSC | -0.238189828 |
| UCK1 | Effector cd4+ memory t (     | LUSC | -0.051636907 |
| UCK1 | Effector cd8+ memory t (     | LUSC | -0.10064673  |
| UCK1 | Effector memory t cell       | LUSC | -0.036123077 |
| UCK1 | Effector regulatory t (treg  | LUSC | -0.069957319 |
| UCK1 | Elvidge_hif1a_targets_up     | LUSC | 0.000732267  |
| UCK1 | Endothelial cell             | LUSC | -0.144992052 |
| UCK1 | Eosinophil                   | LUSC | -0.116567451 |
| UCK1 | Ether lipid metabolism       | LUSC | -0.154673393 |
| UCK1 | Exhausted cd4+ t cell        | LUSC | -0.042437592 |
| UCK1 | Exhausted cd8+ t cell        | LUSC | -0.084075358 |
| UCK1 | Exhausted t cell             | LUSC | 0.040298445  |
| UCK1 | Fat cell (adipocyte)         | LUSC | -0.015071467 |
| UCK1 | Fatty acid biosynthesis      | LUSC | -0.047004009 |
| UCK1 | Fatty acid degradation       | LUSC | -0.046553462 |
| UCK1 | Fatty acid elongation        | LUSC | -0.003955969 |
| UCK1 | Fibroblast                   | LUSC | -0.179102246 |
| UCK1 | Folate biosynthesis          | LUSC | 0.155153075  |
| UCK1 | Follicular b cell            | LUSC | -0.08284111  |
| UCK1 | Follicular dendritic cell    | LUSC | -0.069196864 |
| UCK1 | Follicular helper (tfh) t ce | LUSC | -0.072202807 |
| UCK1 | Follicular t cell            | LUSC | 0.072161953  |
| UCK1 | Foxp3+il-17+ t cell          | LUSC | 0.003283054  |
| UCK1 | Fructose and mannose me      | LUSC | -0.133742507 |
| UCK1 | G2m_checkpoint               | LUSC | 0.049498202  |
| UCK1 | Galactose metabolism         | LUSC | -0.040334151 |
| UCK1 | Galie_tumor_stemness_ge      | LUSC | -0.096648521 |
| UCK1 | Glutathione metabolism       | LUSC | 0.04649044   |
| UCK1 | Glycerolipid metabolism      | LUSC | 0.125208198  |
| UCK1 | Glycerophospholipid met      | LUSC | -0.032188787 |
| UCK1 | Glycine, serine and threor   | LUSC | 0.012454082  |
| UCK1 | Glycolysis / gluconeogene    | LUSC | -0.095103168 |

|      |                           |      |              |
|------|---------------------------|------|--------------|
| UCK1 | Glycosaminoglycan biosyn  | LUSC | -0.136438631 |
| UCK1 | Glycosaminoglycan biosyn  | LUSC | -0.040788337 |
| UCK1 | Glycosaminoglycan biosyn  | LUSC | -0.061098042 |
| UCK1 | Glycosaminoglycan degra   | LUSC | -0.118541004 |
| UCK1 | Glycosphingolipid biosyn  | LUSC | 0.012752632  |
| UCK1 | Glycosphingolipid biosyn  | LUSC | -0.014580572 |
| UCK1 | Glycosphingolipid biosyn  | LUSC | -0.013885167 |
| UCK1 | Glycosylphosphatidylinos  | LUSC | 0.113746202  |
| UCK1 | Glyoxylate and dicarboxy  | LUSC | 0.044110293  |
| UCK1 | Granulocyte               | LUSC | -0.118031355 |
| UCK1 | Hedgehog_signaling        | LUSC | -0.052510993 |
| UCK1 | Histidine metabolism      | LUSC | -0.075485164 |
| UCK1 | Hypoxia                   | LUSC | -0.191366311 |
| UCK1 | Il-17alpha t cell         | LUSC | -0.019782516 |
| UCK1 | Il2_stat5_signaling       | LUSC | -0.166179229 |
| UCK1 | Il6_jak_stat3_signaling   | LUSC | -0.219367735 |
| UCK1 | Immune_checkpoints_tun    | LUSC | -0.082955347 |
| UCK1 | Immune_inhibition_cytok   | LUSC | -0.216670896 |
| UCK1 | Inositol phosphate metabo | LUSC | -0.039130093 |
| UCK1 | Interleukin_6_signaling   | LUSC | -0.265120809 |
| UCK1 | Jaeger_metastasis_up      | LUSC | 0.03076713   |
| UCK1 | Jain_nfkb_signaling       | LUSC | -0.035880573 |
| UCK1 | Kras_signaling_up         | LUSC | -0.19237409  |
| UCK1 | Linoleic acid metabolism  | LUSC | -0.079165435 |
| UCK1 | Lipoic acid metabolism    | LUSC | 0.044553112  |
| UCK1 | Lysine degradation        | LUSC | 0.1051866    |
| UCK1 | Lysosome                  | LUSC | -0.114686846 |
| UCK1 | M1 macrophage             | LUSC | -0.111248832 |
| UCK1 | M2 macrophage             | LUSC | -0.089488447 |
| UCK1 | Mannose type o-glycan bi  | LUSC | 0.215984537  |
| UCK1 | Mapk_signaling_pathway    | LUSC | -0.185023481 |
| UCK1 | Mapk3_erk1_activation     | LUSC | -0.231682589 |
| UCK1 | Marginal zone b cell      | LUSC | -0.04998032  |
| UCK1 | Memory b cell             | LUSC | -0.076239855 |
| UCK1 | Mesenchymal cell          | LUSC | -0.089128794 |
| UCK1 | Mesenchymal stem cell     | LUSC | -0.149928188 |
| UCK1 | Metabolism of xenobiotic  | LUSC | -0.028081477 |
| UCK1 | Migrating cancer stem cel | LUSC | -0.113130404 |
| UCK1 | Mitotic_spindle           | LUSC | -0.088307441 |
| UCK1 | Monocyte                  | LUSC | -0.14648479  |
| UCK1 | Mtor_signaling_pathway    | LUSC | -0.140620009 |
| UCK1 | Mtorc1_signaling          | LUSC | -0.081544295 |
| UCK1 | Mucin type o-glycan bios  | LUSC | -0.278455602 |

|      |                             |      |              |
|------|-----------------------------|------|--------------|
| UCK1 | Myc_targets_v1              | LUSC | 0.036238427  |
| UCK1 | Myeloid cell                | LUSC | -0.099208999 |
| UCK1 | N-glycan biosynthesis       | LUSC | 0.118589067  |
| UCK1 | Naive b cell                | LUSC | -0.05733627  |
| UCK1 | Naive cd4+ t cell           | LUSC | -0.082329602 |
| UCK1 | Naive cd8+ t cell           | LUSC | -0.050604813 |
| UCK1 | Natural killer cell         | LUSC | -0.040833032 |
| UCK1 | Natural killer t (nkt) cell | LUSC | 0.014011991  |
| UCK1 | Natural regulatory t (treg) | LUSC | -0.105812293 |
| UCK1 | Neomycin, kanamycin and     | LUSC | -0.044164977 |
| UCK1 | Neutrophil                  | LUSC | -0.250830929 |
| UCK1 | Nicotinate and nicotinami   | LUSC | -0.027258765 |
| UCK1 | Nitrogen metabolism         | LUSC | -0.034026157 |
| UCK1 | Nod_like_receptor_signal    | LUSC | -0.295083045 |
| UCK1 | Notch_signaling             | LUSC | -0.082167873 |
| UCK1 | One carbon pool by folate   | LUSC | 0.080155698  |
| UCK1 | Other glycan degradation    | LUSC | -0.05634034  |
| UCK1 | Other types of o-glycan b   | LUSC | 0.079147521  |
| UCK1 | Oxidative phosphorylatio    | LUSC | 0.080675518  |
| UCK1 | P53_pathway                 | LUSC | -0.123459885 |
| UCK1 | P53_signaling_pathway       | LUSC | -0.227723731 |
| UCK1 | Pantothenate and coa bios   | LUSC | -0.196238329 |
| UCK1 | Pentose and glucuronate i   | LUSC | -0.016578644 |
| UCK1 | Pentose phosphate pathwa    | LUSC | 0.029223436  |
| UCK1 | Pericyte                    | LUSC | -0.146652808 |
| UCK1 | Phenylalanine metabolism    | LUSC | -0.067138953 |
| UCK1 | Phenylalanine, tyrosine ar  | LUSC | 0.065745978  |
| UCK1 | Phosphonate and phosphir    | LUSC | 0.165668956  |
| UCK1 | Pi3k_akt_activation         | LUSC | -0.109514962 |
| UCK1 | Pi3k_akt_mtor_signaling     | LUSC | -0.049975783 |
| UCK1 | Porphyrin and chlorophyl    | LUSC | 0.085833654  |
| UCK1 | Primary bile acid biosynt   | LUSC | -0.121825441 |
| UCK1 | Propanoate metabolism       | LUSC | -0.088378331 |
| UCK1 | Purine metabolism           | LUSC | 0.034216961  |
| UCK1 | Pyrimidine metabolism       | LUSC | 0.113964091  |
| UCK1 | Pyruvate metabolism         | LUSC | 0.085921789  |
| UCK1 | Regulation_of_autophagy     | LUSC | 0.08450738   |
| UCK1 | Retinol metabolism          | LUSC | -0.072744159 |
| UCK1 | Riboflavin metabolism       | LUSC | 0.124978259  |
| UCK1 | Schmahl_pdgf_signaling      | LUSC | -0.060494229 |
| UCK1 | Selenocompound metabol      | LUSC | 0.011545368  |
| UCK1 | Signaling_by_hippo          | LUSC | -0.101506476 |
| UCK1 | Sphingolipid metabolism     | LUSC | 0.022480229  |

|      |                            |      |              |
|------|----------------------------|------|--------------|
| UCK1 | Starch and sucrose metabo  | LUSC | -0.107462003 |
| UCK1 | Steroid biosynthesis       | LUSC | 0.050525496  |
| UCK1 | Steroid hormone biosynth   | LUSC | -0.114127747 |
| UCK1 | Sulfur metabolism          | LUSC | -0.224078704 |
| UCK1 | Synthesis and degradation  | LUSC | -0.005854592 |
| UCK1 | T helper cell              | LUSC | -0.063537567 |
| UCK1 | T helper1 (th1) cell       | LUSC | -0.076444563 |
| UCK1 | T helper17 (th17) cell     | LUSC | -0.183673254 |
| UCK1 | T helper2 (th2) cell       | LUSC | -0.116146723 |
| UCK1 | T helper9 (th9) cell       | LUSC | -0.038520095 |
| UCK1 | Taurine and hypotaurine r  | LUSC | 0.017557779  |
| UCK1 | Terpenoid backbone biosy   | LUSC | -0.147275585 |
| UCK1 | Tgf_beta_signaling_pathw   | LUSC | -0.133413598 |
| UCK1 | Thiamine metabolism        | LUSC | 0.15944611   |
| UCK1 | Tnfa_signaling_via_nfk     | LUSC | -0.258351226 |
| UCK1 | Tryptophan metabolism      | LUSC | -0.034197638 |
| UCK1 | Tumor endothelial cell     | LUSC | -0.023000932 |
| UCK1 | Tyrosine metabolism        | LUSC | -0.040642009 |
| UCK1 | Ubiquinone and other ter   | LUSC | 0.043547041  |
| UCK1 | Valine, leucine and isoleu | LUSC | -0.149571752 |
| UCK1 | Valine, leucine and isoleu | LUSC | -0.007193079 |
| UCK1 | Vascular endothelial cell  | LUSC | -0.145854524 |
| UCK1 | Vascular smooth muscle c   | LUSC | -0.028996528 |
| UCK1 | Vegf_signaling_pathway     | LUSC | -0.239239352 |
| UCK1 | Vitamin b6 metabolism      | LUSC | 0.073255802  |
| UCK1 | Willert_wnt_signaling      | LUSC | -0.037746818 |
| UCK1 | Wnt_beta_catenin_signali   | LUSC | 0.007605571  |
| UCK2 | Abnormal plasma cell       | LUSC | -0.068219599 |
| UCK2 | Activated b cell           | LUSC | -0.288678472 |
| UCK2 | Activated cd4+ t cell      | LUSC | -0.218522413 |
| UCK2 | Activated t cell           | LUSC | -0.172740674 |
| UCK2 | Alanine, aspartate and glu | LUSC | 0.375174906  |
| UCK2 | Alcala_apoptosis           | LUSC | 0.293438217  |
| UCK2 | Alpha-linolenic acid meta  | LUSC | -0.332516465 |
| UCK2 | Amino sugar and nucleoti   | LUSC | 0.078453109  |
| UCK2 | Ampk_pathway               | LUSC | 0.188027213  |
| UCK2 | Angiogenesis               | LUSC | -0.252174668 |
| UCK2 | Arachidonic acid metaboli  | LUSC | -0.182300264 |
| UCK2 | Arginine and proline met   | LUSC | 0.193473466  |
| UCK2 | Arginine biosynthesis      | LUSC | 0.068703008  |
| UCK2 | Ascorbate and aldarate m   | LUSC | 0.199334315  |
| UCK2 | Atypical memory b cell     | LUSC | -0.222045969 |
| UCK2 | Axl+siglec6+ dendritic ce  | LUSC | -0.36227671  |

|      |                             |      |              |
|------|-----------------------------|------|--------------|
| UCK2 | B cell                      | LUSC | -0.292511384 |
| UCK2 | B1 cell                     | LUSC | -0.275014534 |
| UCK2 | Basal cell                  | LUSC | 0.025315484  |
| UCK2 | Beta-alanine metabolism     | LUSC | 0.035475744  |
| UCK2 | Biosynthesis of unsaturate  | LUSC | 0.154172113  |
| UCK2 | Biotin metabolism           | LUSC | 0.123883763  |
| UCK2 | Butanoate metabolism        | LUSC | 0.127735749  |
| UCK2 | Caffeine metabolism         | LUSC | -0.274669601 |
| UCK2 | Cancer stem cell            | LUSC | -0.226185755 |
| UCK2 | Cancer stem-like cell       | LUSC | -0.193402586 |
| UCK2 | Cd4+ cytotoxic t cell       | LUSC | -0.28822294  |
| UCK2 | Cd4+ memory t cell          | LUSC | -0.268176708 |
| UCK2 | Cd4+ regulatory t cell      | LUSC | -0.173309953 |
| UCK2 | Cd4+ t helper cell          | LUSC | -0.205810504 |
| UCK2 | Cd4+cd25+ regulatory t c    | LUSC | -0.188377048 |
| UCK2 | Cd8+ cytotoxic t cell       | LUSC | -0.116624041 |
| UCK2 | Cd8+ regulatory t cell      | LUSC | -0.127072474 |
| UCK2 | Cell_cycle                  | LUSC | 0.483981238  |
| UCK2 | Chandran_metastasis_top     | LUSC | 0.379728994  |
| UCK2 | Citrate cycle (tca cycle)   | LUSC | 0.388326224  |
| UCK2 | Cysteine and methionine r   | LUSC | 0.355757661  |
| UCK2 | Cytokine induced killer c   | LUSC | -0.15677162  |
| UCK2 | D-arginine and d-ornithin   | LUSC | -0.09985347  |
| UCK2 | D-glutamine and d-glutan    | LUSC | 0.113819874  |
| UCK2 | Dendritic cell              | LUSC | -0.322758501 |
| UCK2 | Dna_repair                  | LUSC | 0.435454318  |
| UCK2 | Dna_replication             | LUSC | 0.503543349  |
| UCK2 | Double-negative memory      | LUSC | -0.233789527 |
| UCK2 | Drug metabolism - cytoch    | LUSC | 0.0348399    |
| UCK2 | Drug metabolism - other     | LUSC | 0.326826074  |
| UCK2 | E2f_targets                 | LUSC | 0.515425846  |
| UCK2 | Ecm_receptor_interaction    | LUSC | -0.283380391 |
| UCK2 | Effector cd4+ memory t      | LUSC | -0.245072727 |
| UCK2 | Effector cd8+ memory t      | LUSC | -0.354747345 |
| UCK2 | Effector memory t cell      | LUSC | -0.238017312 |
| UCK2 | Effector regulatory t (treg | LUSC | -0.201902028 |
| UCK2 | Elvidge_hif1a_targets_up    | LUSC | 0.397535902  |
| UCK2 | Endothelial cell            | LUSC | -0.244243148 |
| UCK2 | Eosinophil                  | LUSC | -0.274661314 |
| UCK2 | Ether lipid metabolism      | LUSC | -0.323016818 |
| UCK2 | Exhausted cd4+ t cell       | LUSC | -0.193678817 |
| UCK2 | Exhausted cd8+ t cell       | LUSC | -0.23923373  |
| UCK2 | Exhausted t cell            | LUSC | -0.15746765  |



|      |                                |      |              |
|------|--------------------------------|------|--------------|
| UCK2 | Fat cell (adipocyte)           | LUSC | -0.057865597 |
| UCK2 | Fatty acid biosynthesis        | LUSC | -0.01320659  |
| UCK2 | Fatty acid degradation         | LUSC | 0.079428144  |
| UCK2 | Fatty acid elongation          | LUSC | 0.258245457  |
| UCK2 | Fibroblast                     | LUSC | -0.283653576 |
| UCK2 | Folate biosynthesis            | LUSC | 0.281374329  |
| UCK2 | Follicular b cell              | LUSC | -0.299803325 |
| UCK2 | Follicular dendritic cell      | LUSC | -0.295568976 |
| UCK2 | Follicular helper (tfh) t cell | LUSC | -0.217923491 |
| UCK2 | Follicular t cell              | LUSC | -0.185901867 |
| UCK2 | Foxp3+il-17+ t cell            | LUSC | -0.114619959 |
| UCK2 | Fructose and mannose me        | LUSC | 0.162448984  |
| UCK2 | G2m_checkpoint                 | LUSC | 0.46518356   |
| UCK2 | Galactose metabolism           | LUSC | 0.063518956  |
| UCK2 | Galie_tumor_stemness_ge        | LUSC | -0.25541099  |
| UCK2 | Glutathione metabolism         | LUSC | 0.283864144  |
| UCK2 | Glycerolipid metabolism        | LUSC | 0.090011378  |
| UCK2 | Glycerophospholipid met        | LUSC | -0.238437588 |
| UCK2 | Glycine, serine and threo      | LUSC | 0.210009942  |
| UCK2 | Glycolysis / gluconeogene      | LUSC | 0.245293218  |
| UCK2 | Glycosaminoglycan biosy        | LUSC | -0.239370475 |
| UCK2 | Glycosaminoglycan biosy        | LUSC | -0.126583022 |
| UCK2 | Glycosaminoglycan biosy        | LUSC | 0.009894105  |
| UCK2 | Glycosaminoglycan degra        | LUSC | -0.284977557 |
| UCK2 | Glycosphingolipid biosyn       | LUSC | -0.249839153 |
| UCK2 | Glycosphingolipid biosyn       | LUSC | -0.158695595 |
| UCK2 | Glycosphingolipid biosyn       | LUSC | 0.040857862  |
| UCK2 | Glycosylphosphatidylinos       | LUSC | 0.298352151  |
| UCK2 | Glyoxylate and dicarboxy       | LUSC | 0.338689128  |
| UCK2 | Granulocyte                    | LUSC | -0.244747774 |
| UCK2 | Hedgehog_signaling             | LUSC | -0.167414911 |
| UCK2 | Histidine metabolism           | LUSC | -0.124674889 |
| UCK2 | Hypoxia                        | LUSC | -0.099955008 |
| UCK2 | Il-17alpha t cell              | LUSC | -0.199569302 |
| UCK2 | Il2_stat5_signaling            | LUSC | -0.213187794 |
| UCK2 | Il6_jak_stat3_signaling        | LUSC | -0.250481691 |
| UCK2 | Immune_checkpoints_tur         | LUSC | -0.142341127 |
| UCK2 | Immune_inhibition_cytok        | LUSC | -0.226445467 |
| UCK2 | Inositol phosphate metabo      | LUSC | -0.272816084 |
| UCK2 | Interleukin_6_signaling        | LUSC | -0.26639186  |
| UCK2 | Jaeger_metastasis_up           | LUSC | 0.302069665  |
| UCK2 | Jain_nfkb_signaling            | LUSC | 0.480299314  |
| UCK2 | Kras_signaling_up              | LUSC | -0.272039489 |

|      |                             |      |              |
|------|-----------------------------|------|--------------|
| UCK2 | Linoleic acid metabolism    | LUSC | -0.33054908  |
| UCK2 | Lipoic acid metabolism      | LUSC | 0.184393345  |
| UCK2 | Lysine degradation          | LUSC | 0.328229272  |
| UCK2 | Lysosome                    | LUSC | -0.310150244 |
| UCK2 | M1 macrophage               | LUSC | -0.22370794  |
| UCK2 | M2 macrophage               | LUSC | -0.214996273 |
| UCK2 | Mannose type o-glycan bi    | LUSC | 0.150133546  |
| UCK2 | Mapk_signaling_pathway      | LUSC | -0.330688913 |
| UCK2 | Mapk3_erk1_activation       | LUSC | -0.213049764 |
| UCK2 | Marginal zone b cell        | LUSC | -0.262898041 |
| UCK2 | Memory b cell               | LUSC | -0.222085846 |
| UCK2 | Mesenchymal cell            | LUSC | -0.197599866 |
| UCK2 | Mesenchymal stem cell       | LUSC | -0.307976351 |
| UCK2 | Metabolism of xenobiotic    | LUSC | 0.095861878  |
| UCK2 | Migrating cancer stem cel   | LUSC | 0.228372817  |
| UCK2 | Mitotic_spindle             | LUSC | 0.036305595  |
| UCK2 | Monocyte                    | LUSC | -0.292760239 |
| UCK2 | Mtor_signaling_pathway      | LUSC | -0.125128911 |
| UCK2 | Mtorc1_signaling            | LUSC | 0.451584685  |
| UCK2 | Mucin type o-glycan biosy   | LUSC | -0.203183888 |
| UCK2 | Myc_targets_v1              | LUSC | 0.568758934  |
| UCK2 | Myeloid cell                | LUSC | -0.284916459 |
| UCK2 | N-glycan biosynthesis       | LUSC | 0.147007645  |
| UCK2 | Naive b cell                | LUSC | -0.234469405 |
| UCK2 | Naive cd4+ t cell           | LUSC | -0.33792651  |
| UCK2 | Naive cd8+ t cell           | LUSC | -0.386993837 |
| UCK2 | Natural killer cell         | LUSC | -0.243926527 |
| UCK2 | Natural killer t (nkt) cell | LUSC | 0.067017463  |
| UCK2 | Natural regulatory t (treg) | LUSC | -0.274901731 |
| UCK2 | Neomycin, kanamycin and     | LUSC | -0.059986687 |
| UCK2 | Neutrophil                  | LUSC | -0.25259297  |
| UCK2 | Nicotinate and nicotinami   | LUSC | -0.041016598 |
| UCK2 | Nitrogen metabolism         | LUSC | -0.032537588 |
| UCK2 | Nod_like_receptor_signal    | LUSC | -0.255298696 |
| UCK2 | Notch_signaling             | LUSC | -0.067660913 |
| UCK2 | One carbon pool by folate   | LUSC | 0.419041186  |
| UCK2 | Other glycan degradation    | LUSC | -0.289252611 |
| UCK2 | Other types of o-glycan b   | LUSC | -0.118948143 |
| UCK2 | Oxidative phosphorylatior   | LUSC | 0.328326773  |
| UCK2 | P53_pathway                 | LUSC | -0.130762171 |
| UCK2 | P53_signaling_pathway       | LUSC | -0.017271519 |
| UCK2 | Pantothenate and coa bios   | LUSC | -0.134565633 |
| UCK2 | Pentose and glucuronate in  | LUSC | 0.198582442  |

|      |                            |      |              |
|------|----------------------------|------|--------------|
| UCK2 | Pentose phosphate pathwa   | LUSC | 0.331151126  |
| UCK2 | Pericyte                   | LUSC | -0.278832316 |
| UCK2 | Phenylalanine metabolism   | LUSC | 0.096849186  |
| UCK2 | Phenylalanine, tyrosine ar | LUSC | 0.185908163  |
| UCK2 | Phosphonate and phosphir   | LUSC | 0.21232486   |
| UCK2 | Pi3k_akt_activation        | LUSC | -0.0578389   |
| UCK2 | Pi3k_akt_mtor_signaling    | LUSC | 0.098643434  |
| UCK2 | Porphyrin and chlorophyl   | LUSC | 0.30745695   |
| UCK2 | Primary bile acid biosynt  | LUSC | -0.228027153 |
| UCK2 | Propanoate metabolism      | LUSC | 0.229184596  |
| UCK2 | Purine metabolism          | LUSC | 0.491480086  |
| UCK2 | Pyrimidine metabolism      | LUSC | 0.525322394  |
| UCK2 | Pyruvate metabolism        | LUSC | 0.410446645  |
| UCK2 | Regulation_of_autophagy    | LUSC | 0.177488131  |
| UCK2 | Retinol metabolism         | LUSC | -0.034153846 |
| UCK2 | Riboflavin metabolism      | LUSC | 0.204327031  |
| UCK2 | Schmahl_pdgf_signaling     | LUSC | -0.233873535 |
| UCK2 | Selenocompound metabol     | LUSC | 0.225411672  |
| UCK2 | Signaling_by_hippo         | LUSC | 0.03240503   |
| UCK2 | Sphingolipid metabolism    | LUSC | -0.158045013 |
| UCK2 | Starch and sucrose metabo  | LUSC | -0.086731568 |
| UCK2 | Steroid biosynthesis       | LUSC | 0.233448211  |
| UCK2 | Steroid hormone biosynth   | LUSC | 0.041747611  |
| UCK2 | Sulfur metabolism          | LUSC | -0.043201004 |
| UCK2 | Synthesis and degradation  | LUSC | 0.027827799  |
| UCK2 | T helper cell              | LUSC | -0.2747965   |
| UCK2 | T helper1 (th1) cell       | LUSC | -0.249361954 |
| UCK2 | T helper17 (th17) cell     | LUSC | -0.24002028  |
| UCK2 | T helper2 (th2) cell       | LUSC | -0.287103802 |
| UCK2 | T helper9 (th9) cell       | LUSC | -0.254325722 |
| UCK2 | Taurine and hypotaurine r  | LUSC | -0.179731461 |
| UCK2 | Terpenoid backbone biosy   | LUSC | 0.233935865  |
| UCK2 | Tgf_beta_signaling_pathw   | LUSC | -0.189500453 |
| UCK2 | Thiamine metabolism        | LUSC | 0.07460535   |
| UCK2 | Tnfa_signaling_via_nfkb    | LUSC | -0.232005414 |
| UCK2 | Tryptophan metabolism      | LUSC | 0.087203524  |
| UCK2 | Tumor endothelial cell     | LUSC | -0.058793019 |
| UCK2 | Tyrosine metabolism        | LUSC | -0.037796718 |
| UCK2 | Ubiquinone and other ter   | LUSC | 0.265050576  |
| UCK2 | Valine, leucine and isoleu | LUSC | -0.06343152  |
| UCK2 | Valine, leucine and isoleu | LUSC | 0.221390092  |
| UCK2 | Vascular endothelial cell  | LUSC | -0.287377843 |
| UCK2 | Vascular smooth muscle c   | LUSC | -0.215759336 |

|       |                            |      |              |
|-------|----------------------------|------|--------------|
| UCK2  | Vegf_signaling_pathway     | LUSC | -0.355966963 |
| UCK2  | Vitamin b6 metabolism      | LUSC | 0.298772341  |
| UCK2  | Willert_wnt_signaling      | LUSC | 0.235417811  |
| UCK2  | Wnt_beta_catenin_signali   | LUSC | -0.049052039 |
| UCKL1 | Abnormal plasma cell       | LUSC | -0.158396906 |
| UCKL1 | Activated b cell           | LUSC | -0.156770887 |
| UCKL1 | Activated cd4+ t cell      | LUSC | -0.190361094 |
| UCKL1 | Activated t cell           | LUSC | -0.177660828 |
| UCKL1 | Alanine, aspartate and glu | LUSC | -0.076176433 |
| UCKL1 | Alcala_apoptosis           | LUSC | -0.166776626 |
| UCKL1 | Alpha-linolenic acid meta  | LUSC | -0.071144313 |
| UCKL1 | Amino sugar and nucleoti   | LUSC | -0.15999878  |
| UCKL1 | Ampk_pathway               | LUSC | 0.200981603  |
| UCKL1 | Angiogenesis               | LUSC | -0.203493017 |
| UCKL1 | Arachidonic acid metaboli  | LUSC | -0.184444555 |
| UCKL1 | Arginine and proline met&  | LUSC | -0.190691256 |
| UCKL1 | Arginine biosynthesis      | LUSC | -0.053768688 |
| UCKL1 | Ascorbate and aldarate m&  | LUSC | -0.18914673  |
| UCKL1 | Atypical memory b cell     | LUSC | -0.080610821 |
| UCKL1 | Axl+siglec6+ dendritic ce  | LUSC | -0.26839261  |
| UCKL1 | B cell                     | LUSC | -0.175696245 |
| UCKL1 | B1 cell                    | LUSC | -0.145686864 |
| UCKL1 | Basal cell                 | LUSC | -0.081291178 |
| UCKL1 | Beta-alanine metabolism    | LUSC | -0.180364332 |
| UCKL1 | Biosynthesis of unsaturate | LUSC | -0.218127867 |
| UCKL1 | Biotin metabolism          | LUSC | -0.013147691 |
| UCKL1 | Butanoate metabolism       | LUSC | -0.012728825 |
| UCKL1 | Caffeine metabolism        | LUSC | -0.13366265  |
| UCKL1 | Cancer stem cell           | LUSC | -0.322452973 |
| UCKL1 | Cancer stem-like cell      | LUSC | -0.20729566  |
| UCKL1 | Cd4+ cytotoxic t cell      | LUSC | -0.191034084 |
| UCKL1 | Cd4+ memory t cell         | LUSC | -0.171835323 |
| UCKL1 | Cd4+ regulatory t cell     | LUSC | -0.216774299 |
| UCKL1 | Cd4+ t helper cell         | LUSC | -0.189333444 |
| UCKL1 | Cd4+cd25+ regulatory t c   | LUSC | -0.198946148 |
| UCKL1 | Cd8+ cytotoxic t cell      | LUSC | -0.135813289 |
| UCKL1 | Cd8+ regulatory t cell     | LUSC | -0.168055225 |
| UCKL1 | Cell_cycle                 | LUSC | -0.055967137 |
| UCKL1 | Chandran_metastasis_top&   | LUSC | -0.116016848 |
| UCKL1 | Citrate cycle (tca cycle)  | LUSC | -0.052579684 |
| UCKL1 | Cysteine and methionine r  | LUSC | -0.080396707 |
| UCKL1 | Cytokine induced killer &  | LUSC | -0.158860873 |
| UCKL1 | D-arginine and d-ornithin  | LUSC | -0.091223    |

|       |                              |      |              |
|-------|------------------------------|------|--------------|
| UCKL1 | D-glutamine and d-glutan     | LUSC | -0.16069384  |
| UCKL1 | Dendritic cell               | LUSC | -0.197034216 |
| UCKL1 | Dna_repair                   | LUSC | 0.113580063  |
| UCKL1 | Dna_replication              | LUSC | 0.014156245  |
| UCKL1 | Double-negative memory       | LUSC | -0.072478029 |
| UCKL1 | Drug metabolism - cytoch     | LUSC | -0.177573217 |
| UCKL1 | Drug metabolism - other      | LUSC | -0.078218047 |
| UCKL1 | E2f_targets                  | LUSC | -0.0026903   |
| UCKL1 | Ecm_receptor_interaction     | LUSC | -0.185036521 |
| UCKL1 | Effector cd4+ memory t       | LUSC | -0.183943093 |
| UCKL1 | Effector cd8+ memory t       | LUSC | -0.169614599 |
| UCKL1 | Effector memory t cell       | LUSC | -0.199403528 |
| UCKL1 | Effector regulatory t (treg  | LUSC | -0.214920368 |
| UCKL1 | Elvidge_hif1a_targets_up     | LUSC | -0.237148838 |
| UCKL1 | Endothelial cell             | LUSC | -0.311572925 |
| UCKL1 | Eosinophil                   | LUSC | -0.194873434 |
| UCKL1 | Ether lipid metabolism       | LUSC | -0.163746355 |
| UCKL1 | Exhausted cd4+ t cell        | LUSC | -0.223951015 |
| UCKL1 | Exhausted cd8+ t cell        | LUSC | -0.19883923  |
| UCKL1 | Exhausted t cell             | LUSC | -0.14826482  |
| UCKL1 | Fat cell (adipocyte)         | LUSC | 0.049997525  |
| UCKL1 | Fatty acid biosynthesis      | LUSC | -0.107618414 |
| UCKL1 | Fatty acid degradation       | LUSC | -0.134545346 |
| UCKL1 | Fatty acid elongation        | LUSC | -0.052327617 |
| UCKL1 | Fibroblast                   | LUSC | -0.236371574 |
| UCKL1 | Folate biosynthesis          | LUSC | -0.05402119  |
| UCKL1 | Follicular b cell            | LUSC | -0.150295601 |
| UCKL1 | Follicular dendritic cell    | LUSC | -0.14998651  |
| UCKL1 | Follicular helper (tfh) t ce | LUSC | -0.203441873 |
| UCKL1 | Follicular t cell            | LUSC | -0.010125168 |
| UCKL1 | Foxp3+il-17+ t cell          | LUSC | -0.177764047 |
| UCKL1 | Fructose and mannose me      | LUSC | 0.045080671  |
| UCKL1 | G2m_checkpoint               | LUSC | -0.035005087 |
| UCKL1 | Galactose metabolism         | LUSC | -0.135651541 |
| UCKL1 | Galie_tumor_stemness_ge      | LUSC | -0.271494165 |
| UCKL1 | Glutathione metabolism       | LUSC | -0.161613163 |
| UCKL1 | Glycerolipid metabolism      | LUSC | -0.074849894 |
| UCKL1 | Glycerophospholipid metæ     | LUSC | -0.005321547 |
| UCKL1 | Glycine, serine and threor   | LUSC | -0.078832369 |
| UCKL1 | Glycolysis / gluconeogene    | LUSC | -0.164484619 |
| UCKL1 | Glycosaminoglycan biosy      | LUSC | -0.067236924 |
| UCKL1 | Glycosaminoglycan biosy      | LUSC | -0.125867496 |
| UCKL1 | Glycosaminoglycan biosy      | LUSC | -0.196069697 |

|       |                           |      |              |
|-------|---------------------------|------|--------------|
| UCKL1 | Glycosaminoglycan degra   | LUSC | -0.208098447 |
| UCKL1 | Glycosphingolipid biosyn  | LUSC | -0.209218041 |
| UCKL1 | Glycosphingolipid biosyn  | LUSC | -0.234321312 |
| UCKL1 | Glycosphingolipid biosyn  | LUSC | -0.25046351  |
| UCKL1 | Glycosylphosphatidylinos  | LUSC | 0.04601684   |
| UCKL1 | Glyoxylate and dicarboxy  | LUSC | -0.016270834 |
| UCKL1 | Granulocyte               | LUSC | -0.196805522 |
| UCKL1 | Hedgehog_signaling        | LUSC | -0.203872639 |
| UCKL1 | Histidine metabolism      | LUSC | -0.147900426 |
| UCKL1 | Hypoxia                   | LUSC | -0.184275642 |
| UCKL1 | Il-17alpha t cell         | LUSC | -0.211441735 |
| UCKL1 | Il2_stat5_signaling       | LUSC | -0.30062603  |
| UCKL1 | Il6_jak_stat3_signaling   | LUSC | -0.242826969 |
| UCKL1 | Immune_checkpoints_tur    | LUSC | -0.262755213 |
| UCKL1 | Immune_inhibition_cytok   | LUSC | -0.157131551 |
| UCKL1 | Inositol phosphate metabo | LUSC | -0.226599199 |
| UCKL1 | Interleukin_6_signaling   | LUSC | -0.277904804 |
| UCKL1 | Jaeger_metastasis_up      | LUSC | -0.265661473 |
| UCKL1 | Jain_nfkb_signaling       | LUSC | 0.04402475   |
| UCKL1 | Kras_signaling_up         | LUSC | -0.289325996 |
| UCKL1 | Linoleic acid metabolism  | LUSC | -0.019459486 |
| UCKL1 | Lipoic acid metabolism    | LUSC | 0.007507564  |
| UCKL1 | Lysine degradation        | LUSC | -0.071330501 |
| UCKL1 | Lysosome                  | LUSC | -0.228463163 |
| UCKL1 | M1 macrophage             | LUSC | -0.259216531 |
| UCKL1 | M2 macrophage             | LUSC | -0.234363211 |
| UCKL1 | Mannose type o-glycan bi  | LUSC | 0.107048378  |
| UCKL1 | Mapk_signaling_pathway    | LUSC | -0.264826587 |
| UCKL1 | Mapk3_erk1_activation     | LUSC | -0.269113476 |
| UCKL1 | Marginal zone b cell      | LUSC | -0.199275486 |
| UCKL1 | Memory b cell             | LUSC | -0.236194379 |
| UCKL1 | Mesenchymal cell          | LUSC | -0.203186782 |
| UCKL1 | Mesenchymal stem cell     | LUSC | -0.207775272 |
| UCKL1 | Metabolism of xenobiotic  | LUSC | -0.164759793 |
| UCKL1 | Migrating cancer stem cel | LUSC | -0.193884843 |
| UCKL1 | Mitotic_spindle           | LUSC | -0.051505488 |
| UCKL1 | Monocyte                  | LUSC | -0.178972438 |
| UCKL1 | Mtor_signaling_pathway    | LUSC | -0.199018416 |
| UCKL1 | Mtorc1_signaling          | LUSC | -0.234351398 |
| UCKL1 | Mucin type o-glycan bios  | LUSC | -0.298511514 |
| UCKL1 | Myc_targets_v1            | LUSC | -0.026712546 |
| UCKL1 | Myeloid cell              | LUSC | -0.219411522 |
| UCKL1 | N-glycan biosynthesis     | LUSC | -0.211274438 |

|       |                             |      |              |
|-------|-----------------------------|------|--------------|
| UCKL1 | Naive b cell                | LUSC | -0.088572485 |
| UCKL1 | Naive cd4+ t cell           | LUSC | -0.265208702 |
| UCKL1 | Naive cd8+ t cell           | LUSC | -0.133194489 |
| UCKL1 | Natural killer cell         | LUSC | -0.19169363  |
| UCKL1 | Natural killer t (nkt) cell | LUSC | 0.005328421  |
| UCKL1 | Natural regulatory t (treg) | LUSC | -0.232271352 |
| UCKL1 | Neomycin, kanamycin and     | LUSC | -0.120920327 |
| UCKL1 | Neutrophil                  | LUSC | -0.176950513 |
| UCKL1 | Nicotinate and nicotinami   | LUSC | -0.201310168 |
| UCKL1 | Nitrogen metabolism         | LUSC | -0.209370896 |
| UCKL1 | Nod_like_receptor_signal    | LUSC | -0.18586902  |
| UCKL1 | Notch_signaling             | LUSC | -0.143719264 |
| UCKL1 | One carbon pool by folate   | LUSC | -0.010098284 |
| UCKL1 | Other glycan degradation    | LUSC | 0.018895716  |
| UCKL1 | Other types of o-glycan b   | LUSC | 0.08769212   |
| UCKL1 | Oxidative phosphorylatio    | LUSC | 0.066441258  |
| UCKL1 | P53_pathway                 | LUSC | -0.170606337 |
| UCKL1 | P53_signaling_pathway       | LUSC | -0.211596864 |
| UCKL1 | Pantothenate and coa bios   | LUSC | -0.042779401 |
| UCKL1 | Pentose and glucuronate i   | LUSC | -0.170463247 |
| UCKL1 | Pentose phosphate pathwa    | LUSC | -0.15397981  |
| UCKL1 | Pericyte                    | LUSC | -0.173068911 |
| UCKL1 | Phenylalanine metabolism    | LUSC | -0.103853464 |
| UCKL1 | Phenylalanine, tyrosine ar  | LUSC | -0.030233056 |
| UCKL1 | Phosphonate and phosphir    | LUSC | -0.107934933 |
| UCKL1 | Pi3k_akt_activation         | LUSC | -0.300602401 |
| UCKL1 | Pi3k_akt_mtor_signaling     | LUSC | -0.324711911 |
| UCKL1 | Porphyrin and chlorophyl    | LUSC | -0.171133166 |
| UCKL1 | Primary bile acid biosynt   | LUSC | -0.07375928  |
| UCKL1 | Propanoate metabolism       | LUSC | -0.138633774 |
| UCKL1 | Purine metabolism           | LUSC | -0.054968937 |
| UCKL1 | Pyrimidine metabolism       | LUSC | 0.060287633  |
| UCKL1 | Pyruvate metabolism         | LUSC | -0.047512181 |
| UCKL1 | Regulation_of_autophagy     | LUSC | -0.019937399 |
| UCKL1 | Retinol metabolism          | LUSC | -0.163131855 |
| UCKL1 | Riboflavin metabolism       | LUSC | -0.157156302 |
| UCKL1 | Schmahl_pdgf_signaling      | LUSC | -0.35445499  |
| UCKL1 | Selenocompound metabol      | LUSC | -0.11389905  |
| UCKL1 | Signaling_by_hippo          | LUSC | -0.129499401 |
| UCKL1 | Sphingolipid metabolism     | LUSC | -0.333276176 |
| UCKL1 | Starch and sucrose metabo   | LUSC | -0.227816983 |
| UCKL1 | Steroid biosynthesis        | LUSC | -0.033321457 |
| UCKL1 | Steroid hormone biosynth    | LUSC | -0.148132422 |

|       |                            |      |              |
|-------|----------------------------|------|--------------|
| UCKL1 | Sulfur metabolism          | LUSC | -0.130565612 |
| UCKL1 | Synthesis and degradation  | LUSC | 0.058429943  |
| UCKL1 | T helper cell              | LUSC | -0.21562607  |
| UCKL1 | T helper1 (th1) cell       | LUSC | -0.177821952 |
| UCKL1 | T helper17 (th17) cell     | LUSC | -0.200086695 |
| UCKL1 | T helper2 (th2) cell       | LUSC | -0.191866202 |
| UCKL1 | T helper9 (th9) cell       | LUSC | -0.141886642 |
| UCKL1 | Taurine and hypotaurine r  | LUSC | 0.120795516  |
| UCKL1 | Terpenoid backbone biosy   | LUSC | -0.051207836 |
| UCKL1 | Tgf_beta_signaling_pathw   | LUSC | -0.332866342 |
| UCKL1 | Thiamine metabolism        | LUSC | -0.019880194 |
| UCKL1 | Tnfa_signaling_via_nfkb    | LUSC | -0.165387604 |
| UCKL1 | Tryptophan metabolism      | LUSC | -0.189592667 |
| UCKL1 | Tumor endothelial cell     | LUSC | -0.046104546 |
| UCKL1 | Tyrosine metabolism        | LUSC | -0.14745934  |
| UCKL1 | Ubiquinone and other terç  | LUSC | -0.066409623 |
| UCKL1 | Valine, leucine and isoleu | LUSC | -0.089057171 |
| UCKL1 | Valine, leucine and isoleu | LUSC | -0.057834113 |
| UCKL1 | Vascular endothelial cell  | LUSC | -0.184881384 |
| UCKL1 | Vascular smooth muscle c   | LUSC | -0.200056624 |
| UCKL1 | Vegf_signaling_pathway     | LUSC | -0.140585235 |
| UCKL1 | Vitamin b6 metabolism      | LUSC | -0.133097872 |
| UCKL1 | Willert_wnt_signaling      | LUSC | -0.129727744 |
| UCKL1 | Wnt_beta_catenin_signali   | LUSC | -0.004218975 |
| UPP1  | Abnormal plasma cell       | LUSC | -0.212076042 |
| UPP1  | Activated b cell           | LUSC | 0.036495332  |
| UPP1  | Activated cd4+ t cell      | LUSC | 0.060416971  |
| UPP1  | Activated t cell           | LUSC | 0.017271617  |
| UPP1  | Alanine, aspartate and glu | LUSC | 0.123709996  |
| UPP1  | Alcala_apoptosis           | LUSC | 0.203446859  |
| UPP1  | Alpha-linolenic acid meta  | LUSC | 0.107719597  |
| UPP1  | Amino sugar and nucleoti   | LUSC | 0.454800345  |
| UPP1  | Ampk_pathway               | LUSC | -0.215827287 |
| UPP1  | Angiogenesis               | LUSC | 0.315571011  |
| UPP1  | Arachidonic acid metabol   | LUSC | 0.248004792  |
| UPP1  | Arginine and proline metæ  | LUSC | 0.248660306  |
| UPP1  | Arginine biosynthesis      | LUSC | 0.249966461  |
| UPP1  | Ascorbate and aldarate mε  | LUSC | -0.036793289 |
| UPP1  | Atypical memory b cell     | LUSC | 0.024444958  |
| UPP1  | Axl+siglec6+ dendritic ce  | LUSC | 0.08185895   |
| UPP1  | B cell                     | LUSC | 0.019518877  |
| UPP1  | B1 cell                    | LUSC | -0.098824403 |
| UPP1  | Basal cell                 | LUSC | 0.338678062  |



|      |                                      |      |              |
|------|--------------------------------------|------|--------------|
| UPP1 | Beta-alanine metabolism              | LUSC | 0.101752592  |
| UPP1 | Biosynthesis of unsaturate           | LUSC | 0.196178187  |
| UPP1 | Biotin metabolism                    | LUSC | 0.047858622  |
| UPP1 | Butanoate metabolism                 | LUSC | -0.067651184 |
| UPP1 | Caffeine metabolism                  | LUSC | 0.20522534   |
| UPP1 | Cancer stem cell                     | LUSC | 0.112747367  |
| UPP1 | Cancer stem-like cell                | LUSC | -0.095018344 |
| UPP1 | Cd4+ cytotoxic t cell                | LUSC | 0.124217402  |
| UPP1 | Cd4+ memory t cell                   | LUSC | 0.045750858  |
| UPP1 | Cd4+ regulatory t cell               | LUSC | 0.051956816  |
| UPP1 | Cd4+ t helper cell                   | LUSC | 0.018471326  |
| UPP1 | Cd4+cd25+ regulatory t c             | LUSC | 0.028027218  |
| UPP1 | Cd8+ cytotoxic t cell                | LUSC | 0.024065983  |
| UPP1 | Cd8+ regulatory t cell               | LUSC | -0.000388794 |
| UPP1 | Cell_cycle                           | LUSC | -0.093259843 |
| UPP1 | Chandran_metastasis_top <sup>5</sup> | LUSC | -0.221925752 |
| UPP1 | Citrate cycle (tca cycle)            | LUSC | 0.206956886  |
| UPP1 | Cysteine and methionine r            | LUSC | 0.080262828  |
| UPP1 | Cytokine induced killer c $\alpha$   | LUSC | -0.113909291 |
| UPP1 | D-arginine and d-ornithin            | LUSC | 0.060795318  |
| UPP1 | D-glutamine and d-glutan             | LUSC | 0.108663287  |
| UPP1 | Dendritic cell                       | LUSC | 0.18024145   |
| UPP1 | Dna_repair                           | LUSC | 0.109274458  |
| UPP1 | Dna_replication                      | LUSC | -0.05362262  |
| UPP1 | Double-negative memory               | LUSC | -0.020408763 |
| UPP1 | Drug metabolism - cytoch             | LUSC | 0.054708764  |
| UPP1 | Drug metabolism - other c            | LUSC | 0.279990987  |
| UPP1 | E2f_targets                          | LUSC | -0.111527907 |
| UPP1 | Ecm_receptor_interaction             | LUSC | 0.150348272  |
| UPP1 | Effector cd4+ memory t (             | LUSC | -0.013530882 |
| UPP1 | Effector cd8+ memory t (             | LUSC | 0.193456745  |
| UPP1 | Effector memory t cell               | LUSC | 0.014896673  |
| UPP1 | Effector regulatory t (treg          | LUSC | 0.050870858  |
| UPP1 | Elvidge_hif1a_targets_up             | LUSC | 0.129340918  |
| UPP1 | Endothelial cell                     | LUSC | 0.036524473  |
| UPP1 | Eosinophil                           | LUSC | 0.166876782  |
| UPP1 | Ether lipid metabolism               | LUSC | 0.123120503  |
| UPP1 | Exhausted cd4+ t cell                | LUSC | 0.12567313   |
| UPP1 | Exhausted cd8+ t cell                | LUSC | 0.116437203  |
| UPP1 | Exhausted t cell                     | LUSC | 0.00847168   |
| UPP1 | Fat cell (adipocyte)                 | LUSC | 0.05927082   |
| UPP1 | Fatty acid biosynthesis              | LUSC | -0.005445767 |
| UPP1 | Fatty acid degradation               | LUSC | -0.027200138 |

|      |                              |      |              |
|------|------------------------------|------|--------------|
| UPP1 | Fatty acid elongation        | LUSC | 0.212598587  |
| UPP1 | Fibroblast                   | LUSC | 0.166027856  |
| UPP1 | Folate biosynthesis          | LUSC | 0.257193568  |
| UPP1 | Follicular b cell            | LUSC | -0.025737416 |
| UPP1 | Follicular dendritic cell    | LUSC | 0.022295619  |
| UPP1 | Follicular helper (tfh) t ce | LUSC | 0.094121189  |
| UPP1 | Follicular t cell            | LUSC | -0.010766009 |
| UPP1 | Foxp3+il-17+ t cell          | LUSC | 0.007865838  |
| UPP1 | Fructose and mannose me      | LUSC | 0.337336824  |
| UPP1 | G2m_checkpoint               | LUSC | -0.150214115 |
| UPP1 | Galactose metabolism         | LUSC | 0.398943426  |
| UPP1 | Galie_tumor_stemness_ge      | LUSC | 0.099883115  |
| UPP1 | Glutathione metabolism       | LUSC | 0.231151176  |
| UPP1 | Glycerolipid metabolism      | LUSC | 0.13927328   |
| UPP1 | Glycerophospholipid metæ     | LUSC | 0.151296701  |
| UPP1 | Glycine, serine and threor   | LUSC | 0.201983755  |
| UPP1 | Glycolysis / gluconeogene    | LUSC | 0.263587257  |
| UPP1 | Glycosaminoglycan biosy1     | LUSC | 0.219058789  |
| UPP1 | Glycosaminoglycan biosy1     | LUSC | -0.03552106  |
| UPP1 | Glycosaminoglycan biosy1     | LUSC | 0.151789793  |
| UPP1 | Glycosaminoglycan degra      | LUSC | 0.233673851  |
| UPP1 | Glycosphingolipid biosyn1    | LUSC | 0.212489117  |
| UPP1 | Glycosphingolipid biosyn1    | LUSC | 0.247945163  |
| UPP1 | Glycosphingolipid biosyn1    | LUSC | 0.192776292  |
| UPP1 | Glycosylphosphatidylinos     | LUSC | -0.037246983 |
| UPP1 | Glyoxylate and dicarboxy     | LUSC | 0.041362093  |
| UPP1 | Granulocyte                  | LUSC | 0.161498292  |
| UPP1 | Hedgehog_signaling           | LUSC | -0.109013423 |
| UPP1 | Histidine metabolism         | LUSC | 0.070342032  |
| UPP1 | Hypoxia                      | LUSC | 0.404739055  |
| UPP1 | Il-17ralpha t cell           | LUSC | 0.079250567  |
| UPP1 | Il2_stat5_signaling          | LUSC | 0.291484918  |
| UPP1 | Il6_jak_stat3_signaling      | LUSC | 0.290883663  |
| UPP1 | Immune_checkpoints_tun       | LUSC | 0.1807493    |
| UPP1 | Immune_inhibition_cytok      | LUSC | 0.297802582  |
| UPP1 | Inositol phosphate metabo    | LUSC | -0.169497695 |
| UPP1 | Interleukin_6_signaling      | LUSC | 0.013598764  |
| UPP1 | Jaeger_metastasis_up         | LUSC | -0.024169596 |
| UPP1 | Jain_nfkb_signaling          | LUSC | -0.01256249  |
| UPP1 | Kras_signaling_up            | LUSC | 0.260185338  |
| UPP1 | Linoleic acid metabolism     | LUSC | 0.019966167  |
| UPP1 | Lipoic acid metabolism       | LUSC | -0.073156869 |
| UPP1 | Lysine degradation           | LUSC | -0.278606109 |

|      |                             |      |              |
|------|-----------------------------|------|--------------|
| UPP1 | Lysosome                    | LUSC | 0.268907883  |
| UPP1 | M1 macrophage               | LUSC | 0.199902039  |
| UPP1 | M2 macrophage               | LUSC | 0.235507295  |
| UPP1 | Mannose type o-glycan bi    | LUSC | -0.134910796 |
| UPP1 | Mapk_signaling_pathway      | LUSC | 0.183041598  |
| UPP1 | Mapk3_erk1_activation       | LUSC | 0.098390097  |
| UPP1 | Marginal zone b cell        | LUSC | -0.038769722 |
| UPP1 | Memory b cell               | LUSC | -0.006016596 |
| UPP1 | Mesenchymal cell            | LUSC | 0.211117659  |
| UPP1 | Mesenchymal stem cell       | LUSC | 0.085197695  |
| UPP1 | Metabolism of xenobiotic    | LUSC | 0.102920256  |
| UPP1 | Migrating cancer stem cel   | LUSC | 0.287028734  |
| UPP1 | Mitotic_spindle             | LUSC | -0.169074467 |
| UPP1 | Monocyte                    | LUSC | 0.323557724  |
| UPP1 | Mtor_signaling_pathway      | LUSC | -0.056775534 |
| UPP1 | Mtorc1_signaling            | LUSC | 0.31385644   |
| UPP1 | Mucin type o-glycan bios    | LUSC | 0.254179919  |
| UPP1 | Myc_targets_v1              | LUSC | 0.101193802  |
| UPP1 | Myeloid cell                | LUSC | 0.081167761  |
| UPP1 | N-glycan biosynthesis       | LUSC | 0.178462982  |
| UPP1 | Naive b cell                | LUSC | -0.057326995 |
| UPP1 | Naive cd4+ t cell           | LUSC | 0.014666729  |
| UPP1 | Naive cd8+ t cell           | LUSC | -0.161641387 |
| UPP1 | Natural killer cell         | LUSC | 0.062169744  |
| UPP1 | Natural killer t (nkt) cell | LUSC | 0.071404964  |
| UPP1 | Natural regulatory t (treg) | LUSC | 0.045688634  |
| UPP1 | Neomycin, kanamycin an      | LUSC | 0.288018645  |
| UPP1 | Neutrophil                  | LUSC | 0.382431862  |
| UPP1 | Nicotinate and nicotinami   | LUSC | 0.204996264  |
| UPP1 | Nitrogen metabolism         | LUSC | 0.121040402  |
| UPP1 | Nod_like_receptor_signal    | LUSC | 0.336623357  |
| UPP1 | Notch_signaling             | LUSC | 0.139114752  |
| UPP1 | One carbon pool by folate   | LUSC | -0.069924949 |
| UPP1 | Other glycan degradation    | LUSC | 0.101214976  |
| UPP1 | Other types of o-glycan b   | LUSC | -0.02354711  |
| UPP1 | Oxidative phosphorylatio    | LUSC | 0.252323886  |
| UPP1 | P53_pathway                 | LUSC | 0.484410391  |
| UPP1 | P53_signaling_pathway       | LUSC | 0.165441608  |
| UPP1 | Pantothenate and coa bios   | LUSC | 0.071259805  |
| UPP1 | Pentose and glucuronate i   | LUSC | 0.064378466  |
| UPP1 | Pentose phosphate pathwa    | LUSC | 0.300655052  |
| UPP1 | Pericyte                    | LUSC | 0.132212016  |
| UPP1 | Phenylalanine metabolism    | LUSC | 0.241515642  |

|      |                            |      |              |
|------|----------------------------|------|--------------|
| UPP1 | Phenylalanine, tyrosine ar | LUSC | -0.007973437 |
| UPP1 | Phosphonate and phosphir   | LUSC | -0.101329267 |
| UPP1 | Pi3k_akt_activation        | LUSC | 0.030129457  |
| UPP1 | Pi3k_akt_mtor_signaling    | LUSC | 0.276388739  |
| UPP1 | Porphyrin and chlorophyl   | LUSC | 0.14508568   |
| UPP1 | Primary bile acid biosynt  | LUSC | 0.118199014  |
| UPP1 | Propanoate metabolism      | LUSC | -0.10143269  |
| UPP1 | Purine metabolism          | LUSC | 0.206017959  |
| UPP1 | Pyrimidine metabolism      | LUSC | 0.202090685  |
| UPP1 | Pyruvate metabolism        | LUSC | 0.006696571  |
| UPP1 | Regulation_of_autophagy    | LUSC | 0.007861558  |
| UPP1 | Retinol metabolism         | LUSC | 0.114537731  |
| UPP1 | Riboflavin metabolism      | LUSC | 0.207681324  |
| UPP1 | Schmahl_pdgf_signaling     | LUSC | 0.118461889  |
| UPP1 | Selenocompound metabol     | LUSC | -0.287531709 |
| UPP1 | Signaling_by_hippo         | LUSC | -0.02616083  |
| UPP1 | Sphingolipid metabolism    | LUSC | 0.188911533  |
| UPP1 | Starch and sucrose metab   | LUSC | 0.275544427  |
| UPP1 | Steroid biosynthesis       | LUSC | 0.226213513  |
| UPP1 | Steroid hormone biosynth   | LUSC | 0.147676993  |
| UPP1 | Sulfur metabolism          | LUSC | 0.135234453  |
| UPP1 | Synthesis and degradation  | LUSC | -0.100082534 |
| UPP1 | T helper cell              | LUSC | 0.097892014  |
| UPP1 | T helper1 (th1) cell       | LUSC | 0.163380521  |
| UPP1 | T helper17 (th17) cell     | LUSC | 0.278499839  |
| UPP1 | T helper2 (th2) cell       | LUSC | 0.113242302  |
| UPP1 | T helper9 (th9) cell       | LUSC | -0.005229236 |
| UPP1 | Taurine and hypotaurine r  | LUSC | -0.213476981 |
| UPP1 | Terpenoid backbone biosy   | LUSC | 0.202630006  |
| UPP1 | Tgf_beta_signaling_pathw   | LUSC | -0.070910033 |
| UPP1 | Thiamine metabolism        | LUSC | 0.194776951  |
| UPP1 | Tnfa_signaling_via_nfk     | LUSC | 0.40679186   |
| UPP1 | Tryptophan metabolism      | LUSC | 0.05060572   |
| UPP1 | Tumor endothelial cell     | LUSC | 0.351200554  |
| UPP1 | Tyrosine metabolism        | LUSC | 0.189966683  |
| UPP1 | Ubiquinone and other ter   | LUSC | 0.138020516  |
| UPP1 | Valine, leucine and isoleu | LUSC | 0.278118086  |
| UPP1 | Valine, leucine and isoleu | LUSC | -0.061131549 |
| UPP1 | Vascular endothelial cell  | LUSC | 0.076705752  |
| UPP1 | Vascular smooth muscle c   | LUSC | -0.010475319 |
| UPP1 | Vegf_signaling_pathway     | LUSC | 0.180746668  |
| UPP1 | Vitamin b6 metabolism      | LUSC | 0.086227333  |
| UPP1 | Willert_wnt_signaling      | LUSC | 0.045407489  |

|      |                            |      |              |
|------|----------------------------|------|--------------|
| UPP1 | Wnt_beta_catenin_signali   | LUSC | -0.181190202 |
| UPP2 | Abnormal plasma cell       | LUSC | 0.025151788  |
| UPP2 | Activated b cell           | LUSC | -0.034305962 |
| UPP2 | Activated cd4+ t cell      | LUSC | -0.053530454 |
| UPP2 | Activated t cell           | LUSC | -0.06841996  |
| UPP2 | Alanine, aspartate and glu | LUSC | -0.142715729 |
| UPP2 | Alcala_apoptosis           | LUSC | -0.243496392 |
| UPP2 | Alpha-linolenic acid meta  | LUSC | 0.047187358  |
| UPP2 | Amino sugar and nucleoti   | LUSC | -0.090923896 |
| UPP2 | Ampk_pathway               | LUSC | -0.102510011 |
| UPP2 | Angiogenesis               | LUSC | 0.071700629  |
| UPP2 | Arachidonic acid metabol:  | LUSC | 0.001393352  |
| UPP2 | Arginine and proline metæ  | LUSC | -0.126973626 |
| UPP2 | Arginine biosynthesis      | LUSC | -0.164066619 |
| UPP2 | Ascorbate and aldarate mε  | LUSC | 0.036895887  |
| UPP2 | Atypical memory b cell     | LUSC | 0.000539056  |
| UPP2 | Axl+siglec6+ dendritic ce  | LUSC | 0.025477777  |
| UPP2 | B cell                     | LUSC | -0.00023069  |
| UPP2 | B1 cell                    | LUSC | -0.075866612 |
| UPP2 | Basal cell                 | LUSC | -0.018938161 |
| UPP2 | Beta-alanine metabolism    | LUSC | -0.012233406 |
| UPP2 | Biosynthesis of unsaturate | LUSC | -0.117300835 |
| UPP2 | Biotin metabolism          | LUSC | 0.005037548  |
| UPP2 | Butanoate metabolism       | LUSC | -0.018138399 |
| UPP2 | Caffeine metabolism        | LUSC | 0.03797765   |
| UPP2 | Cancer stem cell           | LUSC | 0.009913632  |
| UPP2 | Cancer stem-like cell      | LUSC | 0.039101494  |
| UPP2 | Cd4+ cytotoxic t cell      | LUSC | -0.039250514 |
| UPP2 | Cd4+ memory t cell         | LUSC | -0.030493611 |
| UPP2 | Cd4+ regulatory t cell     | LUSC | -0.048807298 |
| UPP2 | Cd4+ t helper cell         | LUSC | -0.054726583 |
| UPP2 | Cd4+cd25+ regulatory t c   | LUSC | -0.060271069 |
| UPP2 | Cd8+ cytotoxic t cell      | LUSC | -0.090140897 |
| UPP2 | Cd8+ regulatory t cell     | LUSC | -0.078292972 |
| UPP2 | Cell_cycle                 | LUSC | -0.222713275 |
| UPP2 | Chandran_metastasis_topε   | LUSC | -0.163948243 |
| UPP2 | Citrate cycle (tca cycle)  | LUSC | -0.133865511 |
| UPP2 | Cysteine and methionine r  | LUSC | -0.185770871 |
| UPP2 | Cytokine induced killer cε | LUSC | 0.000660422  |
| UPP2 | D-arginine and d-ornithin  | LUSC | 0.031021531  |
| UPP2 | D-glutamine and d-glutan   | LUSC | -0.170584048 |
| UPP2 | Dendritic cell             | LUSC | -0.035131837 |
| UPP2 | Dna_repair                 | LUSC | -0.142195682 |

|      |                              |      |              |
|------|------------------------------|------|--------------|
| UPP2 | Dna_replication              | LUSC | -0.225542315 |
| UPP2 | Double-negative memory       | LUSC | -0.003571948 |
| UPP2 | Drug metabolism - cytoch     | LUSC | 0.059987846  |
| UPP2 | Drug metabolism - other      | LUSC | -0.059855481 |
| UPP2 | E2f_targets                  | LUSC | -0.249888037 |
| UPP2 | Ecm_receptor_interaction     | LUSC | 0.025029122  |
| UPP2 | Effector cd4+ memory t       | LUSC | -0.050184576 |
| UPP2 | Effector cd8+ memory t       | LUSC | -0.018887401 |
| UPP2 | Effector memory t cell       | LUSC | -0.035942262 |
| UPP2 | Effector regulatory t (treg) | LUSC | -0.02991022  |
| UPP2 | Elvidge_hif1a_targets_up     | LUSC | -0.239383783 |
| UPP2 | Endothelial cell             | LUSC | -0.003446453 |
| UPP2 | Eosinophil                   | LUSC | -0.04683479  |
| UPP2 | Ether lipid metabolism       | LUSC | 0.043507321  |
| UPP2 | Exhausted cd4+ t cell        | LUSC | -0.049742181 |
| UPP2 | Exhausted cd8+ t cell        | LUSC | -0.056154798 |
| UPP2 | Exhausted t cell             | LUSC | -0.082740336 |
| UPP2 | Fat cell (adipocyte)         | LUSC | 0.010631542  |
| UPP2 | Fatty acid biosynthesis      | LUSC | -0.024577925 |
| UPP2 | Fatty acid degradation       | LUSC | 0.038616325  |
| UPP2 | Fatty acid elongation        | LUSC | -0.102244741 |
| UPP2 | Fibroblast                   | LUSC | 0.017903383  |
| UPP2 | Folate biosynthesis          | LUSC | -0.107535241 |
| UPP2 | Follicular b cell            | LUSC | -0.016873826 |
| UPP2 | Follicular dendritic cell    | LUSC | -0.055784156 |
| UPP2 | Follicular helper (tfh) t ce | LUSC | -0.039410424 |
| UPP2 | Follicular t cell            | LUSC | -0.125590096 |
| UPP2 | Foxp3+il-17+ t cell          | LUSC | -0.066150642 |
| UPP2 | Fructose and mannose me      | LUSC | -0.104315224 |
| UPP2 | G2m_checkpoint               | LUSC | -0.260247787 |
| UPP2 | Galactose metabolism         | LUSC | -0.164928851 |
| UPP2 | Galie_tumor_stemness_ge      | LUSC | 0.019274956  |
| UPP2 | Glutathione metabolism       | LUSC | -0.114729833 |
| UPP2 | Glycerolipid metabolism      | LUSC | -0.019881015 |
| UPP2 | Glycerophospholipid metæ     | LUSC | 0.046698055  |
| UPP2 | Glycine, serine and threor   | LUSC | -0.074527289 |
| UPP2 | Glycolysis / gluconeogene    | LUSC | -0.13563608  |
| UPP2 | Glycosaminoglycan biosy      | LUSC | 0.067963045  |
| UPP2 | Glycosaminoglycan biosy      | LUSC | 0.088272229  |
| UPP2 | Glycosaminoglycan biosy      | LUSC | 0.015930023  |
| UPP2 | Glycosaminoglycan degra      | LUSC | 0.063312104  |
| UPP2 | Glycosphingolipid biosyn     | LUSC | -0.001316    |
| UPP2 | Glycosphingolipid biosyn     | LUSC | -0.03211679  |

|      |                           |      |              |
|------|---------------------------|------|--------------|
| UPP2 | Glycosphingolipid biosyn  | LUSC | 2.76E-05     |
| UPP2 | Glycosylphosphatidylinos  | LUSC | -0.043475942 |
| UPP2 | Glyoxylate and dicarboxy  | LUSC | -0.124618722 |
| UPP2 | Granulocyte               | LUSC | -0.030318963 |
| UPP2 | Hedgehog signaling        | LUSC | 0.023639454  |
| UPP2 | Histidine metabolism      | LUSC | 0.001361533  |
| UPP2 | Hypoxia                   | LUSC | -0.015155376 |
| UPP2 | Il-17alpha t cell         | LUSC | -0.070196519 |
| UPP2 | Il2_stat5_signaling       | LUSC | -0.075387646 |
| UPP2 | Il6_jak_stat3_signaling   | LUSC | -0.081969362 |
| UPP2 | Immune_checkpoints_tur    | LUSC | -0.05556719  |
| UPP2 | Immune_inhibition_cytok   | LUSC | -0.033889831 |
| UPP2 | Inositol phosphate metabo | LUSC | -0.025954016 |
| UPP2 | Interleukin_6_signaling   | LUSC | -0.11129148  |
| UPP2 | Jaeger_metastasis_up      | LUSC | -0.123268559 |
| UPP2 | Jain_nfkb_signaling       | LUSC | -0.234517135 |
| UPP2 | Kras_signaling_up         | LUSC | -0.002888298 |
| UPP2 | Linoleic acid metabolism  | LUSC | 0.112681336  |
| UPP2 | Lipoic acid metabolism    | LUSC | 0.100390079  |
| UPP2 | Lysine degradation        | LUSC | -0.114176886 |
| UPP2 | Lysosome                  | LUSC | -0.00327433  |
| UPP2 | M1 macrophage             | LUSC | -0.033647487 |
| UPP2 | M2 macrophage             | LUSC | -0.03742663  |
| UPP2 | Mannose type o-glycan bi  | LUSC | 0.038178509  |
| UPP2 | Mapk_signaling_pathway    | LUSC | -0.024938137 |
| UPP2 | Mapk3_erk1_activation     | LUSC | -0.136277256 |
| UPP2 | Marginal zone b cell      | LUSC | -0.042484109 |
| UPP2 | Memory b cell             | LUSC | 0.010008954  |
| UPP2 | Mesenchymal cell          | LUSC | 0.038981921  |
| UPP2 | Mesenchymal stem cell     | LUSC | 0.018508896  |
| UPP2 | Metabolism of xenobiotic  | LUSC | 0.037950403  |
| UPP2 | Migrating cancer stem cel | LUSC | -0.144772763 |
| UPP2 | Mitotic_spindle           | LUSC | -0.192858069 |
| UPP2 | Monocyte                  | LUSC | -0.035466955 |
| UPP2 | Mtor_signaling_pathway    | LUSC | -0.039797213 |
| UPP2 | Mtorc1_signaling          | LUSC | -0.21156815  |
| UPP2 | Mucin type o-glycan bios  | LUSC | 0.02006081   |
| UPP2 | Myc_targets_v1            | LUSC | -0.235550782 |
| UPP2 | Myeloid cell              | LUSC | -0.024368843 |
| UPP2 | N-glycan biosynthesis     | LUSC | -0.050329311 |
| UPP2 | Naive b cell              | LUSC | 0.008058708  |
| UPP2 | Naive cd4+ t cell         | LUSC | -0.014179787 |
| UPP2 | Naive cd8+ t cell         | LUSC | 0.022039434  |

|      |                             |      |              |
|------|-----------------------------|------|--------------|
| UPP2 | Natural killer cell         | LUSC | -0.035614361 |
| UPP2 | Natural killer t (nkt) cell | LUSC | -0.136675418 |
| UPP2 | Natural regulatory t (treg) | LUSC | -0.0341184   |
| UPP2 | Neomycin, kanamycin and     | LUSC | -0.098407179 |
| UPP2 | Neutrophil                  | LUSC | -0.012176274 |
| UPP2 | Nicotinate and nicotinami   | LUSC | -0.062065367 |
| UPP2 | Nitrogen metabolism         | LUSC | 0.053808581  |
| UPP2 | Nod_like_receptor_signal    | LUSC | -0.04780711  |
| UPP2 | Notch_signaling             | LUSC | 0.028032374  |
| UPP2 | One carbon pool by folate   | LUSC | -0.210569369 |
| UPP2 | Other glycan degradation    | LUSC | 0.010624742  |
| UPP2 | Other types of o-glycan b   | LUSC | 0.080782236  |
| UPP2 | Oxidative phosphorylatio    | LUSC | -0.050370217 |
| UPP2 | P53_pathway                 | LUSC | -0.082122603 |
| UPP2 | P53_signaling_pathway       | LUSC | -0.038408965 |
| UPP2 | Pantothenate and coa bios   | LUSC | 0.10097267   |
| UPP2 | Pentose and glucuronate i   | LUSC | 0.042360795  |
| UPP2 | Pentose phosphate pathwa    | LUSC | -0.209064198 |
| UPP2 | Pericyte                    | LUSC | 0.072278922  |
| UPP2 | Phenylalanine metabolism    | LUSC | -0.126411752 |
| UPP2 | Phenylalanine, tyrosine ar  | LUSC | -0.075111763 |
| UPP2 | Phosphonate and phosphir    | LUSC | -0.013014541 |
| UPP2 | Pi3k_akt_activation         | LUSC | -0.004206192 |
| UPP2 | Pi3k_akt_mtor_signaling     | LUSC | -0.144890647 |
| UPP2 | Porphyrin and chlorophyl    | LUSC | -0.042074021 |
| UPP2 | Primary bile acid biosynt   | LUSC | 0.137772468  |
| UPP2 | Propanoate metabolism       | LUSC | -0.030250523 |
| UPP2 | Purine metabolism           | LUSC | -0.20870463  |
| UPP2 | Pyrimidine metabolism       | LUSC | -0.199956918 |
| UPP2 | Pyruvate metabolism         | LUSC | -0.102612561 |
| UPP2 | Regulation_of_autophagy     | LUSC | 0.011180918  |
| UPP2 | Retinol metabolism          | LUSC | 0.058943733  |
| UPP2 | Riboflavin metabolism       | LUSC | -0.085401215 |
| UPP2 | Schmahl_pdgf_signaling      | LUSC | -0.050182817 |
| UPP2 | Selenocompound metabol      | LUSC | -0.064642546 |
| UPP2 | Signaling_by_hippo          | LUSC | -0.096412979 |
| UPP2 | Sphingolipid metabolism     | LUSC | -0.039497788 |
| UPP2 | Starch and sucrose metabo   | LUSC | 0.001228122  |
| UPP2 | Steroid biosynthesis        | LUSC | -0.151747854 |
| UPP2 | Steroid hormone biosynth    | LUSC | 0.068404541  |
| UPP2 | Sulfur metabolism           | LUSC | 0.050834575  |
| UPP2 | Synthesis and degradation   | LUSC | 0.017529681  |
| UPP2 | T helper cell               | LUSC | -0.045143989 |



|      |                            |      |              |
|------|----------------------------|------|--------------|
| UPP2 | T helper1 (th1) cell       | LUSC | -0.067746922 |
| UPP2 | T helper17 (th17) cell     | LUSC | -0.039059038 |
| UPP2 | T helper2 (th2) cell       | LUSC | -0.020766387 |
| UPP2 | T helper9 (th9) cell       | LUSC | -0.035479514 |
| UPP2 | Taurine and hypotaurine r  | LUSC | 0.113302898  |
| UPP2 | Terpenoid backbone biosy   | LUSC | 0.017844938  |
| UPP2 | Tgf_beta_signaling_pathw   | LUSC | 0.009155326  |
| UPP2 | Thiamine metabolism        | LUSC | -0.056518773 |
| UPP2 | Tnfa_signaling_via_nfkb    | LUSC | -0.075941899 |
| UPP2 | Tryptophan metabolism      | LUSC | -0.035827086 |
| UPP2 | Tumor endothelial cell     | LUSC | -0.071851472 |
| UPP2 | Tyrosine metabolism        | LUSC | -0.022843482 |
| UPP2 | Ubiquinone and other terf  | LUSC | -0.036178366 |
| UPP2 | Valine, leucine and isoleu | LUSC | -0.101176812 |
| UPP2 | Valine, leucine and isoleu | LUSC | -0.008089165 |
| UPP2 | Vascular endothelial cell  | LUSC | -0.000275122 |
| UPP2 | Vascular smooth muscle c   | LUSC | 0.050671043  |
| UPP2 | Vegf_signaling_pathway     | LUSC | 0.02954772   |
| UPP2 | Vitamin b6 metabolism      | LUSC | -0.12978807  |
| UPP2 | Willert_wnt_signaling      | LUSC | -0.049139394 |
| UPP2 | Wnt_beta_catenin_signali   | LUSC | 0.018802693  |
| CDA  | Abnormal plasma cell       | MESO | 0.34068338   |
| CDA  | Activated b cell           | MESO | 0.168288823  |
| CDA  | Activated cd4+ t cell      | MESO | 0.155818359  |
| CDA  | Activated t cell           | MESO | 0.226388765  |
| CDA  | Alanine, aspartate and glu | MESO | -0.303739764 |
| CDA  | Alcala_apoptosis           | MESO | -0.057431552 |
| CDA  | Alpha-linolenic acid meta  | MESO | -0.123388066 |
| CDA  | Amino sugar and nucleoti   | MESO | -0.068374339 |
| CDA  | Ampk_pathway               | MESO | 0.015817643  |
| CDA  | Angiogenesis               | MESO | 0.423068819  |
| CDA  | Arachidonic acid metaboli  | MESO | -0.118294925 |
| CDA  | Arginine and proline metε  | MESO | 0.120285103  |
| CDA  | Arginine biosynthesis      | MESO | 0.19810102   |
| CDA  | Ascorbate and aldarate mε  | MESO | -0.281281905 |
| CDA  | Atypical memory b cell     | MESO | 0.109837188  |
| CDA  | Axl+siglec6+ dendritic ce  | MESO | 0.266239618  |
| CDA  | B cell                     | MESO | 0.246381423  |
| CDA  | B1 cell                    | MESO | 0.17195278   |
| CDA  | Basal cell                 | MESO | 0.081207256  |
| CDA  | Beta-alanine metabolism    | MESO | -0.423774732 |
| CDA  | Biosynthesis of unsaturate | MESO | 0.237265033  |
| CDA  | Biotin metabolism          | MESO | -0.162900612 |

|     |                             |      |              |
|-----|-----------------------------|------|--------------|
| CDA | Butanoate metabolism        | MESO | -0.083385014 |
| CDA | Caffeine metabolism         | MESO | -0.122852444 |
| CDA | Cancer stem cell            | MESO | 0.291648867  |
| CDA | Cancer stem-like cell       | MESO | 0.407292615  |
| CDA | Cd4+ cytotoxic t cell       | MESO | 0.220608774  |
| CDA | Cd4+ memory t cell          | MESO | 0.205006472  |
| CDA | Cd4+ regulatory t cell      | MESO | 0.286877785  |
| CDA | Cd4+ t helper cell          | MESO | 0.181037832  |
| CDA | Cd4+cd25+ regulatory t c    | MESO | 0.216475254  |
| CDA | Cd8+ cytotoxic t cell       | MESO | 0.163796404  |
| CDA | Cd8+ regulatory t cell      | MESO | 0.102240526  |
| CDA | Cell_cycle                  | MESO | 0.306901551  |
| CDA | Chandran_metastasis_top     | MESO | -0.195215328 |
| CDA | Citrate cycle (tca cycle)   | MESO | -0.150512676 |
| CDA | Cysteine and methionine r   | MESO | -0.175279044 |
| CDA | Cytokine induced killer c   | MESO | 0.268073681  |
| CDA | D-arginine and d-ornithin   | MESO | 0.004635804  |
| CDA | D-glutamine and d-glutan    | MESO | -0.222876837 |
| CDA | Dendritic cell              | MESO | 0.326207297  |
| CDA | Dna_repair                  | MESO | 0.148496893  |
| CDA | Dna_replication             | MESO | 0.239415755  |
| CDA | Double-negative memory      | MESO | 0.167025878  |
| CDA | Drug metabolism - cytoch    | MESO | -0.222824298 |
| CDA | Drug metabolism - other     | MESO | 0.140680301  |
| CDA | E2f_targets                 | MESO | 0.296158361  |
| CDA | Ecm_receptor_interaction    | MESO | 0.412541009  |
| CDA | Effector cd4+ memory t (    | MESO | 0.159552093  |
| CDA | Effector cd8+ memory t (    | MESO | 0.216940774  |
| CDA | Effector memory t cell      | MESO | 0.169844938  |
| CDA | Effector regulatory t (treg | MESO | 0.313405973  |
| CDA | Elvidge_hif1a_targets_up    | MESO | -0.062146583 |
| CDA | Endothelial cell            | MESO | 0.56207879   |
| CDA | Eosinophil                  | MESO | 0.197996236  |
| CDA | Ether lipid metabolism      | MESO | -0.135257331 |
| CDA | Exhausted cd4+ t cell       | MESO | 0.265845115  |
| CDA | Exhausted cd8+ t cell       | MESO | 0.219872238  |
| CDA | Exhausted t cell            | MESO | 0.076986805  |
| CDA | Fat cell (adipocyte)        | MESO | 0.02680925   |
| CDA | Fatty acid biosynthesis     | MESO | -0.309386394 |
| CDA | Fatty acid degradation      | MESO | -0.232184952 |
| CDA | Fatty acid elongation       | MESO | 0.106194069  |
| CDA | Fibroblast                  | MESO | 0.47350659   |
| CDA | Folate biosynthesis         | MESO | 0.058015705  |

|     |                              |      |              |
|-----|------------------------------|------|--------------|
| CDA | Follicular b cell            | MESO | 0.190181418  |
| CDA | Follicular dendritic cell    | MESO | 0.224217652  |
| CDA | Follicular helper (tfh) t ce | MESO | 0.208472979  |
| CDA | Follicular t cell            | MESO | 0.077341462  |
| CDA | Foxp3+il-17+ t cell          | MESO | 0.194719165  |
| CDA | Fructose and mannose me      | MESO | -0.106551251 |
| CDA | G2m_checkpoint               | MESO | 0.27765635   |
| CDA | Galactose metabolism         | MESO | 0.065428841  |
| CDA | Galie_tumor_stemness_ge      | MESO | 0.14955527   |
| CDA | Glutathione metabolism       | MESO | 0.241801482  |
| CDA | Glycerolipid metabolism      | MESO | 0.217438168  |
| CDA | Glycerophospholipid metæ     | MESO | -0.049480619 |
| CDA | Glycine, serine and threor   | MESO | 0.255686221  |
| CDA | Glycolysis / gluconeogene    | MESO | -0.305226845 |
| CDA | Glycosaminoglycan biosyn     | MESO | 0.520933571  |
| CDA | Glycosaminoglycan biosyn     | MESO | 0.337784727  |
| CDA | Glycosaminoglycan biosyn     | MESO | 0.240874219  |
| CDA | Glycosaminoglycan degra      | MESO | 0.335771739  |
| CDA | Glycosphingolipid biosyn     | MESO | 0.243036365  |
| CDA | Glycosphingolipid biosyn     | MESO | 0.273414514  |
| CDA | Glycosphingolipid biosyn     | MESO | -0.018638923 |
| CDA | Glycosylphosphatidylinos     | MESO | -0.100792703 |
| CDA | Glyoxylate and dicarboxy     | MESO | -0.071384438 |
| CDA | Granulocyte                  | MESO | 0.25159542   |
| CDA | Hedgehog_signaling           | MESO | 0.306052601  |
| CDA | Histidine metabolism         | MESO | -0.445057272 |
| CDA | Hypoxia                      | MESO | 0.152541281  |
| CDA | Il-17alpha t cell            | MESO | 0.205646065  |
| CDA | Il2_stat5_signaling          | MESO | 0.376345758  |
| CDA | Il6_jak_stat3_signaling      | MESO | 0.093449134  |
| CDA | Immune_checkpoints_tun       | MESO | 0.232881407  |
| CDA | Immune_inhibition_cytok      | MESO | 0.2525311    |
| CDA | Inositol phosphate metabo    | MESO | -0.256094827 |
| CDA | Interleukin_6_signaling      | MESO | -0.133274234 |
| CDA | Jaeger_metastasis_up         | MESO | 0.28001467   |
| CDA | Jain_nfkb_signaling          | MESO | -0.031936676 |
| CDA | Kras_signaling_up            | MESO | 0.345529515  |
| CDA | Linoleic acid metabolism     | MESO | -0.284665906 |
| CDA | Lipoic acid metabolism       | MESO | -0.113161445 |
| CDA | Lysine degradation           | MESO | -0.074672618 |
| CDA | Lysosome                     | MESO | 0.147968557  |
| CDA | M1 macrophage                | MESO | 0.191921219  |
| CDA | M2 macrophage                | MESO | 0.341586474  |

|     |                             |      |              |
|-----|-----------------------------|------|--------------|
| CDA | Mannose type o-glycan bi    | MESO | 0.136957423  |
| CDA | Mapk_signaling_pathway      | MESO | 0.203215147  |
| CDA | Mapk3_erk1_activation       | MESO | -0.037753105 |
| CDA | Marginal zone b cell        | MESO | 0.143199313  |
| CDA | Memory b cell               | MESO | 0.127681753  |
| CDA | Mesenchymal cell            | MESO | 0.559218866  |
| CDA | Mesenchymal stem cell       | MESO | 0.44873512   |
| CDA | Metabolism of xenobiotic    | MESO | -0.206607919 |
| CDA | Migrating cancer stem cel   | MESO | -0.100550942 |
| CDA | Mitotic_spindle             | MESO | 0.119135132  |
| CDA | Monocyte                    | MESO | 0.19334056   |
| CDA | Mtor_signaling_pathway      | MESO | -0.223169661 |
| CDA | Mtorc1_signaling            | MESO | 0.123093295  |
| CDA | Mucin type o-glycan bios    | MESO | -0.166181407 |
| CDA | Myc_targets_v1              | MESO | 0.128097452  |
| CDA | Myeloid cell                | MESO | 0.201058878  |
| CDA | N-glycan biosynthesis       | MESO | 0.012273456  |
| CDA | Naive b cell                | MESO | 0.170995172  |
| CDA | Naive cd4+ t cell           | MESO | 0.246918081  |
| CDA | Naive cd8+ t cell           | MESO | 0.159114493  |
| CDA | Natural killer cell         | MESO | 0.142427462  |
| CDA | Natural killer t (nkt) cell | MESO | 0.159051389  |
| CDA | Natural regulatory t (treg) | MESO | 0.286405361  |
| CDA | Neomycin, kanamycin an      | MESO | 0.160996153  |
| CDA | Neutrophil                  | MESO | 0.203080558  |
| CDA | Nicotinate and nicotinami   | MESO | -0.065058369 |
| CDA | Nitrogen metabolism         | MESO | -0.035217851 |
| CDA | Nod_like_receptor_signal    | MESO | -0.038199213 |
| CDA | Notch_signaling             | MESO | 0.31865087   |
| CDA | One carbon pool by folate   | MESO | 0.098124423  |
| CDA | Other glycan degradation    | MESO | -0.1190696   |
| CDA | Other types of o-glycan b   | MESO | 0.107713872  |
| CDA | Oxidative phosphorylatio    | MESO | 0.071931668  |
| CDA | P53_pathway                 | MESO | -0.008246623 |
| CDA | P53_signaling_pathway       | MESO | 0.10615931   |
| CDA | Pantothenate and coa bios   | MESO | -0.114753087 |
| CDA | Pentose and glucuronate i   | MESO | -0.030247141 |
| CDA | Pentose phosphate pathwa    | MESO | 0.000577042  |
| CDA | Pericyte                    | MESO | 0.600804452  |
| CDA | Phenylalanine metabolism    | MESO | -0.223564666 |
| CDA | Phenylalanine, tyrosine ar  | MESO | -0.204565193 |
| CDA | Phosphonate and phosphir    | MESO | 0.057112706  |
| CDA | Pi3k_akt_activation         | MESO | 0.05384117   |

|      |                            |      |              |
|------|----------------------------|------|--------------|
| CDA  | Pi3k_akt_mtor_signaling    | MESO | -0.00227417  |
| CDA  | Porphyrin and chlorophyl   | MESO | -0.061157328 |
| CDA  | Primary bile acid biosynt  | MESO | -0.16745099  |
| CDA  | Propanoate metabolism      | MESO | -0.291201541 |
| CDA  | Purine metabolism          | MESO | 0.293347068  |
| CDA  | Pyrimidine metabolism      | MESO | 0.186799711  |
| CDA  | Pyruvate metabolism        | MESO | -0.17046449  |
| CDA  | Regulation_of_autophagy    | MESO | -0.062463121 |
| CDA  | Retinol metabolism         | MESO | -0.333778955 |
| CDA  | Riboflavin metabolism      | MESO | 0.023353101  |
| CDA  | Schmahl_pdgf_signaling     | MESO | 0.046984665  |
| CDA  | Selenocompound metabol     | MESO | -0.036268775 |
| CDA  | Signaling_by_hippo         | MESO | -0.173773322 |
| CDA  | Sphingolipid metabolism    | MESO | -0.028020032 |
| CDA  | Starch and sucrose metabo  | MESO | -0.186234158 |
| CDA  | Steroid biosynthesis       | MESO | 0.020900885  |
| CDA  | Steroid hormone biosynth   | MESO | -0.245676184 |
| CDA  | Sulfur metabolism          | MESO | -0.106912488 |
| CDA  | Synthesis and degradation  | MESO | 0.164920239  |
| CDA  | T helper cell              | MESO | 0.230667991  |
| CDA  | T helper1 (th1) cell       | MESO | 0.071063679  |
| CDA  | T helper17 (th17) cell     | MESO | 0.173243535  |
| CDA  | T helper2 (th2) cell       | MESO | 0.196276626  |
| CDA  | T helper9 (th9) cell       | MESO | 0.208189237  |
| CDA  | Taurine and hypotaurine r  | MESO | 0.126187705  |
| CDA  | Terpenoid backbone biosy   | MESO | 0.142445087  |
| CDA  | Tgf_beta_signaling_pathw   | MESO | 0.188011091  |
| CDA  | Thiamine metabolism        | MESO | -0.024145597 |
| CDA  | Tnfa_signaling_via_nfkb    | MESO | 0.091761444  |
| CDA  | Tryptophan metabolism      | MESO | -0.027396551 |
| CDA  | Tumor endothelial cell     | MESO | 0.17216334   |
| CDA  | Tyrosine metabolism        | MESO | -0.219951033 |
| CDA  | Ubiquinone and other terp  | MESO | 0.108229342  |
| CDA  | Valine, leucine and isoleu | MESO | 0.050268279  |
| CDA  | Valine, leucine and isoleu | MESO | -0.298734636 |
| CDA  | Vascular endothelial cell  | MESO | 0.575653832  |
| CDA  | Vascular smooth muscle c   | MESO | 0.494792509  |
| CDA  | Vegf_signaling_pathway     | MESO | 0.241249699  |
| CDA  | Vitamin b6 metabolism      | MESO | -0.169853206 |
| CDA  | Willert_wnt_signaling      | MESO | 0.253003558  |
| CDA  | Wnt_beta_catenin_signali   | MESO | 0.370892262  |
| UCK1 | Abnormal plasma cell       | MESO | -0.105946548 |
| UCK1 | Activated b cell           | MESO | -0.184195513 |

|      |                                      |      |              |
|------|--------------------------------------|------|--------------|
| UCK1 | Activated cd4+ t cell                | MESO | -0.287621312 |
| UCK1 | Activated t cell                     | MESO | -0.222852094 |
| UCK1 | Alanine, aspartate and glu           | MESO | -0.128505709 |
| UCK1 | Alcala_apoptosis                     | MESO | -0.027803075 |
| UCK1 | Alpha-linolenic acid meta            | MESO | 0.083436425  |
| UCK1 | Amino sugar and nucleoti             | MESO | -0.141708885 |
| UCK1 | Ampk_pathway                         | MESO | 0.046207908  |
| UCK1 | Angiogenesis                         | MESO | -0.327017388 |
| UCK1 | Arachidonic acid metabol             | MESO | 0.27448466   |
| UCK1 | Arginine and proline metε            | MESO | 0.102473938  |
| UCK1 | Arginine biosynthesis                | MESO | -0.190130585 |
| UCK1 | Ascorbate and aldarate mε            | MESO | 0.13859218   |
| UCK1 | Atypical memory b cell               | MESO | -0.271737389 |
| UCK1 | Axl+siglec6+ dendritic ce            | MESO | -0.152791076 |
| UCK1 | B cell                               | MESO | -0.333813188 |
| UCK1 | B1 cell                              | MESO | -0.179285747 |
| UCK1 | Basal cell                           | MESO | 0.000763318  |
| UCK1 | Beta-alanine metabolism              | MESO | 0.07931165   |
| UCK1 | Biosynthesis of unsaturate           | MESO | -0.221710615 |
| UCK1 | Biotin metabolism                    | MESO | 0.22820795   |
| UCK1 | Butanoate metabolism                 | MESO | 0.288135689  |
| UCK1 | Caffeine metabolism                  | MESO | 0.006884242  |
| UCK1 | Cancer stem cell                     | MESO | -0.434492253 |
| UCK1 | Cancer stem-like cell                | MESO | -0.350032942 |
| UCK1 | Cd4+ cytotoxic t cell                | MESO | -0.208689219 |
| UCK1 | Cd4+ memory t cell                   | MESO | -0.283357413 |
| UCK1 | Cd4+ regulatory t cell               | MESO | -0.202320302 |
| UCK1 | Cd4+ t helper cell                   | MESO | -0.236284677 |
| UCK1 | Cd4+cd25+ regulatory t c             | MESO | -0.234485091 |
| UCK1 | Cd8+ cytotoxic t cell                | MESO | -0.220234057 |
| UCK1 | Cd8+ regulatory t cell               | MESO | -0.275178682 |
| UCK1 | Cell_cycle                           | MESO | -0.131840916 |
| UCK1 | Chandran_metastasis_top <sup>5</sup> | MESO | -0.171459781 |
| UCK1 | Citrate cycle (tca cycle)            | MESO | -0.012281914 |
| UCK1 | Cysteine and methionine r            | MESO | -0.061374773 |
| UCK1 | Cytokine induced killer cε           | MESO | -0.205795491 |
| UCK1 | D-arginine and d-ornithin            | MESO | 0.17109904   |
| UCK1 | D-glutamine and d-glutan             | MESO | -0.351976712 |
| UCK1 | Dendritic cell                       | MESO | -0.375600497 |
| UCK1 | Dna_repair                           | MESO | 0.312793827  |
| UCK1 | Dna_replication                      | MESO | 0.14198155   |
| UCK1 | Double-negative memory               | MESO | -0.18305261  |
| UCK1 | Drug metabolism - cytoch             | MESO | 0.105685904  |

|      |                                     |              |
|------|-------------------------------------|--------------|
| UCK1 | Drug metabolism - other (MESO       | 0.289610165  |
| UCK1 | E2f_targets MESO                    | -0.068225082 |
| UCK1 | Ecm_receptor_interaction MESO       | -0.331775743 |
| UCK1 | Effector cd4+ memory t (MESO        | -0.334516437 |
| UCK1 | Effector cd8+ memory t (MESO        | -0.288283946 |
| UCK1 | Effector memory t cell MESO         | -0.331893663 |
| UCK1 | Effector regulatory t (treg MESO    | -0.284459253 |
| UCK1 | Elvidge_hif1a_targets_up MESO       | -0.46941424  |
| UCK1 | Endothelial cell MESO               | -0.428953666 |
| UCK1 | Eosinophil MESO                     | -0.240248513 |
| UCK1 | Ether lipid metabolism MESO         | -0.10549156  |
| UCK1 | Exhausted cd4+ t cell MESO          | -0.333128185 |
| UCK1 | Exhausted cd8+ t cell MESO          | -0.308027085 |
| UCK1 | Exhausted t cell MESO               | -0.139443854 |
| UCK1 | Fat cell (adipocyte) MESO           | -0.050840336 |
| UCK1 | Fatty acid biosynthesis MESO        | -0.005802148 |
| UCK1 | Fatty acid degradation MESO         | 0.038691994  |
| UCK1 | Fatty acid elongation MESO          | -0.077591429 |
| UCK1 | Fibroblast MESO                     | -0.362561942 |
| UCK1 | Folate biosynthesis MESO            | 0.257971986  |
| UCK1 | Follicular b cell MESO              | -0.308522246 |
| UCK1 | Follicular dendritic cell MESO      | -0.161891292 |
| UCK1 | Follicular helper (tfh) t cell MESO | -0.320489252 |
| UCK1 | Follicular t cell MESO              | -0.052279672 |
| UCK1 | Foxp3+il-17+ t cell MESO            | -0.225705769 |
| UCK1 | Fructose and mannose me MESO        | 0.14912136   |
| UCK1 | G2m_checkpoint MESO                 | -0.162775595 |
| UCK1 | Galactose metabolism MESO           | 0.000473689  |
| UCK1 | Galie_tumor_stemness_ge MESO        | -0.166512477 |
| UCK1 | Glutathione metabolism MESO         | 0.021540313  |
| UCK1 | Glycerolipid metabolism MESO        | -0.004788029 |
| UCK1 | Glycerophospholipid metæ MESO       | -0.019241664 |
| UCK1 | Glycine, serine and threor MESO     | 0.070890131  |
| UCK1 | Glycolysis / gluconeogene MESO      | 0.018448202  |
| UCK1 | Glycosaminoglycan biosy1 MESO       | -0.160424052 |
| UCK1 | Glycosaminoglycan biosy1 MESO       | 0.01351894   |
| UCK1 | Glycosaminoglycan biosy1 MESO       | 0.006639279  |
| UCK1 | Glycosaminoglycan degra MESO        | -0.275077414 |
| UCK1 | Glycosphingolipid biosyn1 MESO      | -0.130540702 |
| UCK1 | Glycosphingolipid biosyn1 MESO      | -0.048080016 |
| UCK1 | Glycosphingolipid biosyn1 MESO      | 0.092489673  |
| UCK1 | Glycosylphosphatidylinos: MESO      | 0.186049386  |
| UCK1 | Glyoxylate and dicarboxy MESO       | 0.057005457  |

|      |                             |      |              |
|------|-----------------------------|------|--------------|
| UCK1 | Granulocyte                 | MESO | -0.304762782 |
| UCK1 | Hedgehog_signaling          | MESO | -0.251430192 |
| UCK1 | Histidine metabolism        | MESO | 0.243550607  |
| UCK1 | Hypoxia                     | MESO | -0.197585595 |
| UCK1 | Il-17alpha t cell           | MESO | -0.255698157 |
| UCK1 | Il2_stat5_signaling         | MESO | -0.369380444 |
| UCK1 | Il6_jak_stat3_signaling     | MESO | -0.414191422 |
| UCK1 | Immune_checkpoints_tun      | MESO | -0.270735197 |
| UCK1 | Immune_inhibition_cytok     | MESO | -0.138293945 |
| UCK1 | Inositol phosphate metabo   | MESO | -0.272363138 |
| UCK1 | Interleukin_6_signaling     | MESO | -0.588220885 |
| UCK1 | Jaeger_metastasis_up        | MESO | -0.193469972 |
| UCK1 | Jain_nfkb_signaling         | MESO | -0.215593507 |
| UCK1 | Kras_signaling_up           | MESO | -0.436836239 |
| UCK1 | Linoleic acid metabolism    | MESO | 0.134992596  |
| UCK1 | Lipoic acid metabolism      | MESO | 0.247618234  |
| UCK1 | Lysine degradation          | MESO | 0.028357175  |
| UCK1 | Lysosome                    | MESO | -0.18602496  |
| UCK1 | M1 macrophage               | MESO | -0.320095058 |
| UCK1 | M2 macrophage               | MESO | -0.313609278 |
| UCK1 | Mannose type o-glycan bi    | MESO | 0.172339976  |
| UCK1 | Mapk_signaling_pathway      | MESO | -0.387656393 |
| UCK1 | Mapk3_erk1_activation       | MESO | -0.600695396 |
| UCK1 | Marginal zone b cell        | MESO | -0.266459479 |
| UCK1 | Memory b cell               | MESO | -0.235775718 |
| UCK1 | Mesenchymal cell            | MESO | -0.214395489 |
| UCK1 | Mesenchymal stem cell       | MESO | -0.45479545  |
| UCK1 | Metabolism of xenobiotic    | MESO | 0.260220483  |
| UCK1 | Migrating cancer stem cel   | MESO | -0.17252451  |
| UCK1 | Mitotic_spindle             | MESO | -0.269124819 |
| UCK1 | Monocyte                    | MESO | -0.271414453 |
| UCK1 | Mtor_signaling_pathway      | MESO | -0.100455682 |
| UCK1 | Mtorc1_signaling            | MESO | -0.322066054 |
| UCK1 | Mucin type o-glycan biosy   | MESO | -0.362388811 |
| UCK1 | Myc_targets_v1              | MESO | 0.009164059  |
| UCK1 | Myeloid cell                | MESO | -0.355473177 |
| UCK1 | N-glycan biosynthesis       | MESO | -0.205276196 |
| UCK1 | Naive b cell                | MESO | -0.245719271 |
| UCK1 | Naive cd4+ t cell           | MESO | -0.397865699 |
| UCK1 | Naive cd8+ t cell           | MESO | -0.178882012 |
| UCK1 | Natural killer cell         | MESO | -0.256080538 |
| UCK1 | Natural killer t (nkt) cell | MESO | -0.283233954 |
| UCK1 | Natural regulatory t (treg) | MESO | -0.254404752 |



|      |                            |      |              |
|------|----------------------------|------|--------------|
| UCK1 | Neomycin, kanamycin and    | MESO | -0.128354146 |
| UCK1 | Neutrophil                 | MESO | -0.324011343 |
| UCK1 | Nicotinate and nicotinami  | MESO | -0.085147333 |
| UCK1 | Nitrogen metabolism        | MESO | 0.061631873  |
| UCK1 | Nod_like_receptor_signal   | MESO | -0.42231536  |
| UCK1 | Notch_signaling            | MESO | -0.2251824   |
| UCK1 | One carbon pool by folate  | MESO | -0.03325559  |
| UCK1 | Other glycan degradation   | MESO | -0.068418511 |
| UCK1 | Other types of o-glycan b  | MESO | 0.150204421  |
| UCK1 | Oxidative phosphorylatio   | MESO | 0.227254137  |
| UCK1 | P53_pathway                | MESO | 0.083109753  |
| UCK1 | P53_signaling_pathway      | MESO | -0.110217309 |
| UCK1 | Pantothenate and coa bios  | MESO | -0.083932704 |
| UCK1 | Pentose and glucuronate i  | MESO | 0.123146579  |
| UCK1 | Pentose phosphate pathwa   | MESO | 0.070637554  |
| UCK1 | Pericyte                   | MESO | -0.322409211 |
| UCK1 | Phenylalanine metabolism   | MESO | 0.127244741  |
| UCK1 | Phenylalanine, tyrosine ar | MESO | 0.187286606  |
| UCK1 | Phosphonate and phosphir   | MESO | -0.08564447  |
| UCK1 | Pi3k_akt_activation        | MESO | -0.34959175  |
| UCK1 | Pi3k_akt_mtor_signaling    | MESO | -0.31160085  |
| UCK1 | Porphyrin and chlorophyl   | MESO | 0.270759511  |
| UCK1 | Primary bile acid biosynt  | MESO | -0.009969473 |
| UCK1 | Propanoate metabolism      | MESO | -0.106850074 |
| UCK1 | Purine metabolism          | MESO | -0.02415511  |
| UCK1 | Pyrimidine metabolism      | MESO | 0.124650062  |
| UCK1 | Pyruvate metabolism        | MESO | 0.086684533  |
| UCK1 | Regulation_of_autophagy    | MESO | 0.042532019  |
| UCK1 | Retinol metabolism         | MESO | 0.298659092  |
| UCK1 | Riboflavin metabolism      | MESO | 0.105719052  |
| UCK1 | Schmahl_pdgf_signaling     | MESO | -0.226209678 |
| UCK1 | Selenocompound metabol     | MESO | -0.32625173  |
| UCK1 | Signaling_by_hippo         | MESO | -0.287200113 |
| UCK1 | Sphingolipid metabolism    | MESO | -0.268002501 |
| UCK1 | Starch and sucrose metab   | MESO | -0.186810812 |
| UCK1 | Steroid biosynthesis       | MESO | -0.132042438 |
| UCK1 | Steroid hormone biosynth   | MESO | 0.293455659  |
| UCK1 | Sulfur metabolism          | MESO | 0.028698292  |
| UCK1 | Synthesis and degradation  | MESO | 0.271494462  |
| UCK1 | T helper cell              | MESO | -0.281546818 |
| UCK1 | T helper1 (th1) cell       | MESO | -0.195672503 |
| UCK1 | T helper17 (th17) cell     | MESO | -0.332308284 |
| UCK1 | T helper2 (th2) cell       | MESO | -0.241765523 |

|      |                            |      |              |
|------|----------------------------|------|--------------|
| UCK1 | T helper9 (th9) cell       | MESO | -0.159248744 |
| UCK1 | Taurine and hypotaurine r  | MESO | 0.116832606  |
| UCK1 | Terpenoid backbone biosy   | MESO | -0.074513358 |
| UCK1 | Tgf_beta_signaling_pathw   | MESO | -0.349281965 |
| UCK1 | Thiamine metabolism        | MESO | 0.159258547  |
| UCK1 | Tnfa_signaling_via_nfkb    | MESO | -0.255862285 |
| UCK1 | Tryptophan metabolism      | MESO | 0.000101721  |
| UCK1 | Tumor endothelial cell     | MESO | -0.162041028 |
| UCK1 | Tyrosine metabolism        | MESO | 0.154441434  |
| UCK1 | Ubiquinone and other terf  | MESO | 0.09986335   |
| UCK1 | Valine, leucine and isoleu | MESO | 0.07939967   |
| UCK1 | Valine, leucine and isoleu | MESO | 0.071979498  |
| UCK1 | Vascular endothelial cell  | MESO | -0.302809245 |
| UCK1 | Vascular smooth muscle c   | MESO | -0.280359757 |
| UCK1 | Vegf_signaling_pathway     | MESO | -0.308698334 |
| UCK1 | Vitamin b6 metabolism      | MESO | 0.286332245  |
| UCK1 | Willert_wnt_signaling      | MESO | -0.310410409 |
| UCK1 | Wnt_beta_catenin_signali   | MESO | 0.008310079  |
| UCK2 | Abnormal plasma cell       | MESO | 0.364008614  |
| UCK2 | Activated b cell           | MESO | 0.077226434  |
| UCK2 | Activated cd4+ t cell      | MESO | 0.103342552  |
| UCK2 | Activated t cell           | MESO | 0.184645556  |
| UCK2 | Alanine, aspartate and glu | MESO | 0.0331104    |
| UCK2 | Alcala_apoptosis           | MESO | 0.163788479  |
| UCK2 | Alpha-linolenic acid meta  | MESO | -0.312371603 |
| UCK2 | Amino sugar and nucleoti   | MESO | 0.126507997  |
| UCK2 | Ampk_pathway               | MESO | 0.25082099   |
| UCK2 | Angiogenesis               | MESO | 0.373945555  |
| UCK2 | Arachidonic acid metabol   | MESO | -0.340261041 |
| UCK2 | Arginine and proline metæ  | MESO | 0.047794461  |
| UCK2 | Arginine biosynthesis      | MESO | 0.252181933  |
| UCK2 | Ascorbate and aldarate mε  | MESO | -0.095114643 |
| UCK2 | Atypical memory b cell     | MESO | 0.140278     |
| UCK2 | Axl+siglec6+ dendritic ce  | MESO | -0.000867779 |
| UCK2 | B cell                     | MESO | 0.037293487  |
| UCK2 | B1 cell                    | MESO | 0.121929938  |
| UCK2 | Basal cell                 | MESO | 0.180660512  |
| UCK2 | Beta-alanine metabolism    | MESO | -0.375340087 |
| UCK2 | Biosynthesis of unsaturate | MESO | 0.335750372  |
| UCK2 | Biotin metabolism          | MESO | -0.216116707 |
| UCK2 | Butanoate metabolism       | MESO | -0.385568864 |
| UCK2 | Caffeine metabolism        | MESO | -0.035508411 |
| UCK2 | Cancer stem cell           | MESO | 0.284059962  |

|      |                              |      |              |
|------|------------------------------|------|--------------|
| UCK2 | Cancer stem-like cell        | MESO | 0.227154527  |
| UCK2 | Cd4+ cytotoxic t cell        | MESO | 0.158162848  |
| UCK2 | Cd4+ memory t cell           | MESO | 0.096259929  |
| UCK2 | Cd4+ regulatory t cell       | MESO | 0.108486729  |
| UCK2 | Cd4+ t helper cell           | MESO | 0.063798144  |
| UCK2 | Cd4+cd25+ regulatory t c     | MESO | 0.09789536   |
| UCK2 | Cd8+ cytotoxic t cell        | MESO | 0.11527388   |
| UCK2 | Cd8+ regulatory t cell       | MESO | 0.144546719  |
| UCK2 | Cell_cycle                   | MESO | 0.493450093  |
| UCK2 | Chandran_metastasis_top5     | MESO | 0.243786796  |
| UCK2 | Citrate cycle (tca cycle)    | MESO | -0.056487177 |
| UCK2 | Cysteine and methionine r    | MESO | 0.025335951  |
| UCK2 | Cytokine induced killer c    | MESO | 0.128767758  |
| UCK2 | D-arginine and d-ornithin    | MESO | -0.101855579 |
| UCK2 | D-glutamine and d-glutan     | MESO | 0.018491883  |
| UCK2 | Dendritic cell               | MESO | 0.126523284  |
| UCK2 | Dna_repair                   | MESO | 0.169493164  |
| UCK2 | Dna_replication              | MESO | 0.342947898  |
| UCK2 | Double-negative memory       | MESO | 0.087030966  |
| UCK2 | Drug metabolism - cytoch     | MESO | -0.308215274 |
| UCK2 | Drug metabolism - other c    | MESO | 0.180652562  |
| UCK2 | E2f_targets                  | MESO | 0.521690943  |
| UCK2 | Ecm_receptor_interaction     | MESO | 0.402933657  |
| UCK2 | Effector cd4+ memory t (     | MESO | 0.052614383  |
| UCK2 | Effector cd8+ memory t (     | MESO | 0.192619847  |
| UCK2 | Effector memory t cell       | MESO | 0.081095153  |
| UCK2 | Effector regulatory t (treg  | MESO | 0.126706486  |
| UCK2 | Elvidge_hif1a_targets_up     | MESO | 0.418523226  |
| UCK2 | Endothelial cell             | MESO | 0.440606267  |
| UCK2 | Eosinophil                   | MESO | 0.099388598  |
| UCK2 | Ether lipid metabolism       | MESO | -0.305413584 |
| UCK2 | Exhausted cd4+ t cell        | MESO | 0.183533144  |
| UCK2 | Exhausted cd8+ t cell        | MESO | 0.15789577   |
| UCK2 | Exhausted t cell             | MESO | 0.082331526  |
| UCK2 | Fat cell (adipocyte)         | MESO | 0.07831921   |
| UCK2 | Fatty acid biosynthesis      | MESO | -0.178774171 |
| UCK2 | Fatty acid degradation       | MESO | -0.400668851 |
| UCK2 | Fatty acid elongation        | MESO | 0.177287108  |
| UCK2 | Fibroblast                   | MESO | 0.345340594  |
| UCK2 | Folate biosynthesis          | MESO | -0.072787679 |
| UCK2 | Follicular b cell            | MESO | 0.100409664  |
| UCK2 | Follicular dendritic cell    | MESO | 0.072811467  |
| UCK2 | Follicular helper (tfh) t ce | MESO | 0.200033049  |

|      |                            |      |              |
|------|----------------------------|------|--------------|
| UCK2 | Follicular t cell          | MESO | 0.111960755  |
| UCK2 | Foxp3+il-17+ t cell        | MESO | 0.161995137  |
| UCK2 | Fructose and mannose me    | MESO | 0.071214779  |
| UCK2 | G2m_checkpoint             | MESO | 0.541828877  |
| UCK2 | Galactose metabolism       | MESO | 0.105259283  |
| UCK2 | Galie_tumor_stemness_ge    | MESO | 0.092700856  |
| UCK2 | Glutathione metabolism     | MESO | 0.029419975  |
| UCK2 | Glycerolipid metabolism    | MESO | 0.305782778  |
| UCK2 | Glycerophospholipid metæ   | MESO | 0.035401069  |
| UCK2 | Glycine, serine and threor | MESO | 0.146981561  |
| UCK2 | Glycolysis / gluconeogene  | MESO | -0.145832167 |
| UCK2 | Glycosaminoglycan biosyn   | MESO | 0.349397149  |
| UCK2 | Glycosaminoglycan biosyn   | MESO | 0.164606117  |
| UCK2 | Glycosaminoglycan biosyn   | MESO | 0.311286532  |
| UCK2 | Glycosaminoglycan degra    | MESO | 0.115162844  |
| UCK2 | Glycosphingolipid biosyn   | MESO | 0.067530872  |
| UCK2 | Glycosphingolipid biosyn   | MESO | -0.003326303 |
| UCK2 | Glycosphingolipid biosyn   | MESO | 0.197281787  |
| UCK2 | Glycosylphosphatidylinos   | MESO | -0.190737518 |
| UCK2 | Glyoxylate and dicarboxy   | MESO | -0.159083224 |
| UCK2 | Granulocyte                | MESO | 0.098471529  |
| UCK2 | Hedgehog_signaling         | MESO | 0.276396126  |
| UCK2 | Histidine metabolism       | MESO | -0.311631616 |
| UCK2 | Hypoxia                    | MESO | 0.293897821  |
| UCK2 | Il-17ralpha t cell         | MESO | 0.120837051  |
| UCK2 | Il2_stat5_signaling        | MESO | 0.370708978  |
| UCK2 | Il6_jak_stat3_signaling    | MESO | 0.08837986   |
| UCK2 | Immune_checkpoints_tun     | MESO | 0.116095445  |
| UCK2 | Immune_inhibition_cytok    | MESO | 0.116649119  |
| UCK2 | Inositol phosphate metabo  | MESO | -0.113998992 |
| UCK2 | Interleukin_6_signaling    | MESO | 0.033919443  |
| UCK2 | Jaeger_metastasis_up       | MESO | 0.371087179  |
| UCK2 | Jain_nfkb_signaling        | MESO | 0.392302451  |
| UCK2 | Kras_signaling_up          | MESO | 0.203221047  |
| UCK2 | Linoleic acid metabolism   | MESO | -0.378986822 |
| UCK2 | Lipoic acid metabolism     | MESO | -0.426312526 |
| UCK2 | Lysine degradation         | MESO | -0.109218393 |
| UCK2 | Lysosome                   | MESO | -0.019803637 |
| UCK2 | M1 macrophage              | MESO | 0.050381178  |
| UCK2 | M2 macrophage              | MESO | 0.09871802   |
| UCK2 | Mannose type o-glycan bi   | MESO | 0.448658566  |
| UCK2 | Mapk_signaling_pathway     | MESO | 0.361347625  |
| UCK2 | Mapk3_erk1_activation      | MESO | 0.066855311  |

|      |                                          |      |              |
|------|------------------------------------------|------|--------------|
| UCK2 | Marginal zone b cell                     | MESO | -0.013632876 |
| UCK2 | Memory b cell                            | MESO | -0.053219301 |
| UCK2 | Mesenchymal cell                         | MESO | 0.492305432  |
| UCK2 | Mesenchymal stem cell                    | MESO | 0.373276094  |
| UCK2 | Metabolism of xenobiotics                | MESO | -0.272222455 |
| UCK2 | Migrating cancer stem cell               | MESO | -0.07166529  |
| UCK2 | Mitotic_spindle                          | MESO | 0.332699263  |
| UCK2 | Monocyte                                 | MESO | 0.082422295  |
| UCK2 | Mtor_signaling_pathway                   | MESO | -0.046879993 |
| UCK2 | Mtorc1_signaling                         | MESO | 0.4600603    |
| UCK2 | Mucin type o-glycan biosynthesis         | MESO | -0.044562157 |
| UCK2 | Myc_targets_v1                           | MESO | 0.493531019  |
| UCK2 | Myeloid cell                             | MESO | 0.109633613  |
| UCK2 | N-glycan biosynthesis                    | MESO | 0.022157574  |
| UCK2 | Naive b cell                             | MESO | 0.243792924  |
| UCK2 | Naive cd4+ t cell                        | MESO | 0.031591438  |
| UCK2 | Naive cd8+ t cell                        | MESO | -0.069911634 |
| UCK2 | Natural killer cell                      | MESO | 0.08937982   |
| UCK2 | Natural killer t (nkt) cell              | MESO | 0.192560695  |
| UCK2 | Natural regulatory t (treg) cell         | MESO | 0.104715529  |
| UCK2 | Neomycin, kanamycin and streptomycin     | MESO | 0.336056982  |
| UCK2 | Neutrophil                               | MESO | 0.135660872  |
| UCK2 | Nicotinate and nicotinamide              | MESO | 0.080591665  |
| UCK2 | Nitrogen metabolism                      | MESO | 0.078819895  |
| UCK2 | Nod_like_receptor_signaling              | MESO | -0.012740572 |
| UCK2 | Notch_signaling                          | MESO | 0.201352681  |
| UCK2 | One carbon pool by folate                | MESO | 0.299765075  |
| UCK2 | Other glycan degradation                 | MESO | -0.352503929 |
| UCK2 | Other types of o-glycan biosynthesis     | MESO | 0.15229447   |
| UCK2 | Oxidative phosphorylation                | MESO | -0.018758263 |
| UCK2 | P53_pathway                              | MESO | 0.047555334  |
| UCK2 | P53_signaling_pathway                    | MESO | 0.264498876  |
| UCK2 | Pantothenate and coa biosynthesis        | MESO | -0.263132093 |
| UCK2 | Pentose and glucuronate interconversions | MESO | 0.093189257  |
| UCK2 | Pentose phosphate pathway                | MESO | 0.102965755  |
| UCK2 | Pericyte                                 | MESO | 0.402509418  |
| UCK2 | Phenylalanine metabolism                 | MESO | -0.101722061 |
| UCK2 | Phenylalanine, tyrosine and tryptophan   | MESO | -0.089853872 |
| UCK2 | Phosphonate and phosphite                | MESO | 0.073473831  |
| UCK2 | Pi3k_akt_activation                      | MESO | 0.058342574  |
| UCK2 | Pi3k_akt_mtor_signaling                  | MESO | 0.316271145  |
| UCK2 | Porphyrin and chlorophyll biosynthesis   | MESO | 0.130070311  |
| UCK2 | Primary bile acid biosynthesis           | MESO | -0.350689636 |

|       |                            |      |              |
|-------|----------------------------|------|--------------|
| UCK2  | Propanoate metabolism      | MESO | -0.362797259 |
| UCK2  | Purine metabolism          | MESO | 0.563672675  |
| UCK2  | Pyrimidine metabolism      | MESO | 0.421839084  |
| UCK2  | Pyruvate metabolism        | MESO | -0.173616805 |
| UCK2  | Regulation_of_autophagy    | MESO | -0.09022624  |
| UCK2  | Retinol metabolism         | MESO | -0.370696846 |
| UCK2  | Riboflavin metabolism      | MESO | 0.214557704  |
| UCK2  | Schmahl_pdgf_signaling     | MESO | 0.109519192  |
| UCK2  | Selenocompound metabol     | MESO | 0.116310866  |
| UCK2  | Signaling_by_hippo         | MESO | -0.094592478 |
| UCK2  | Sphingolipid metabolism    | MESO | -0.048917434 |
| UCK2  | Starch and sucrose metabo  | MESO | -0.072423821 |
| UCK2  | Steroid biosynthesis       | MESO | 0.296536121  |
| UCK2  | Steroid hormone biosynth   | MESO | -0.187830651 |
| UCK2  | Sulfur metabolism          | MESO | -0.345334739 |
| UCK2  | Synthesis and degradation  | MESO | -0.083759207 |
| UCK2  | T helper cell              | MESO | 0.129280756  |
| UCK2  | T helper1 (th1) cell       | MESO | -0.000711321 |
| UCK2  | T helper17 (th17) cell     | MESO | 0.088838792  |
| UCK2  | T helper2 (th2) cell       | MESO | 0.120696202  |
| UCK2  | T helper9 (th9) cell       | MESO | 0.061693459  |
| UCK2  | Taurine and hypotaurine r  | MESO | -0.248857013 |
| UCK2  | Terpenoid backbone biosy   | MESO | 0.217457539  |
| UCK2  | Tgf_beta_signaling_pathw   | MESO | 0.225474665  |
| UCK2  | Thiamine metabolism        | MESO | -0.179147051 |
| UCK2  | Tnfa_signaling_via_nfbk    | MESO | 0.206267291  |
| UCK2  | Tryptophan metabolism      | MESO | -0.193999653 |
| UCK2  | Tumor endothelial cell     | MESO | 0.41733172   |
| UCK2  | Tyrosine metabolism        | MESO | -0.345011593 |
| UCK2  | Ubiquinone and other terf  | MESO | -0.184163424 |
| UCK2  | Valine, leucine and isoleu | MESO | 0.098187612  |
| UCK2  | Valine, leucine and isoleu | MESO | -0.387601699 |
| UCK2  | Vascular endothelial cell  | MESO | 0.359621861  |
| UCK2  | Vascular smooth muscle c   | MESO | 0.394023242  |
| UCK2  | Vegf_signaling_pathway     | MESO | 0.276031536  |
| UCK2  | Vitamin b6 metabolism      | MESO | -0.093592124 |
| UCK2  | Willert_wnt_signaling      | MESO | 0.468561589  |
| UCK2  | Wnt_beta_catenin_signali   | MESO | 0.278795717  |
| UCKL1 | Abnormal plasma cell       | MESO | 0.15016443   |
| UCKL1 | Activated b cell           | MESO | -0.021029045 |
| UCKL1 | Activated cd4+ t cell      | MESO | -0.10417097  |
| UCKL1 | Activated t cell           | MESO | -0.000246901 |
| UCKL1 | Alanine, aspartate and glu | MESO | -0.096015326 |

|       |                            |      |              |
|-------|----------------------------|------|--------------|
| UCKL1 | Alcala_apoptosis           | MESO | 0.221404608  |
| UCKL1 | Alpha-linolenic acid meta  | MESO | 0.182090974  |
| UCKL1 | Amino sugar and nucleoti   | MESO | -0.110175206 |
| UCKL1 | Ampk_pathway               | MESO | 0.036386226  |
| UCKL1 | Angiogenesis               | MESO | -0.261143075 |
| UCKL1 | Arachidonic acid metabol   | MESO | 0.247113116  |
| UCKL1 | Arginine and proline metε  | MESO | -0.005521142 |
| UCKL1 | Arginine biosynthesis      | MESO | -0.022176997 |
| UCKL1 | Ascorbate and aldarate mε  | MESO | -0.075301885 |
| UCKL1 | Atypical memory b cell     | MESO | -0.004830326 |
| UCKL1 | Axl+siglec6+ dendritic ce  | MESO | -0.152688912 |
| UCKL1 | B cell                     | MESO | -0.087412081 |
| UCKL1 | B1 cell                    | MESO | 0.014813737  |
| UCKL1 | Basal cell                 | MESO | 0.156753108  |
| UCKL1 | Beta-alanine metabolism    | MESO | 0.011971729  |
| UCKL1 | Biosynthesis of unsaturate | MESO | -0.043612501 |
| UCKL1 | Biotin metabolism          | MESO | 0.052618985  |
| UCKL1 | Butanoate metabolism       | MESO | 0.290625718  |
| UCKL1 | Caffeine metabolism        | MESO | -0.092153991 |
| UCKL1 | Cancer stem cell           | MESO | -0.236670042 |
| UCKL1 | Cancer stem-like cell      | MESO | -0.035702919 |
| UCKL1 | Cd4+ cytotoxic t cell      | MESO | 0.001960173  |
| UCKL1 | Cd4+ memory t cell         | MESO | -0.030796518 |
| UCKL1 | Cd4+ regulatory t cell     | MESO | -0.012169541 |
| UCKL1 | Cd4+ t helper cell         | MESO | 0.012128462  |
| UCKL1 | Cd4+cd25+ regulatory t c   | MESO | 0.013737686  |
| UCKL1 | Cd8+ cytotoxic t cell      | MESO | 0.12129968   |
| UCKL1 | Cd8+ regulatory t cell     | MESO | 0.003438034  |
| UCKL1 | Cell_cycle                 | MESO | 0.000593877  |
| UCKL1 | Chandran_metastasis_topε   | MESO | -0.29686628  |
| UCKL1 | Citrate cycle (tca cycle)  | MESO | 0.014378717  |
| UCKL1 | Cysteine and methionine r  | MESO | -0.08193181  |
| UCKL1 | Cytokine induced killer cε | MESO | 0.174930318  |
| UCKL1 | D-arginine and d-ornithin  | MESO | 0.050912531  |
| UCKL1 | D-glutamine and d-glutan   | MESO | -0.332936071 |
| UCKL1 | Dendritic cell             | MESO | -0.101432703 |
| UCKL1 | Dna_repair                 | MESO | 0.410674852  |
| UCKL1 | Dna_replication            | MESO | 0.212625173  |
| UCKL1 | Double-negative memory     | MESO | 0.0415226    |
| UCKL1 | Drug metabolism - cytoch   | MESO | -0.025176889 |
| UCKL1 | Drug metabolism - other ε  | MESO | 0.229557869  |
| UCKL1 | E2f_targets                | MESO | 0.057092759  |
| UCKL1 | Ecm_receptor_interaction   | MESO | -0.28802903  |

|       |                                   |              |
|-------|-----------------------------------|--------------|
| UCKL1 | Effector cd4+ memory t ( MESO     | -0.139223299 |
| UCKL1 | Effector cd8+ memory t ( MESO     | -0.124986463 |
| UCKL1 | Effector memory t cell MESO       | -0.057634936 |
| UCKL1 | Effector regulatory t (treg MESO  | -0.11730779  |
| UCKL1 | Elvidge_hif1a_targets_up MESO     | -0.331969701 |
| UCKL1 | Endothelial cell MESO             | -0.221460268 |
| UCKL1 | Eosinophil MESO                   | -0.069012283 |
| UCKL1 | Ether lipid metabolism MESO       | 0.090737734  |
| UCKL1 | Exhausted cd4+ t cell MESO        | -0.048115675 |
| UCKL1 | Exhausted cd8+ t cell MESO        | -0.018315148 |
| UCKL1 | Exhausted t cell MESO             | 0.135827055  |
| UCKL1 | Fat cell (adipocyte) MESO         | -0.026131401 |
| UCKL1 | Fatty acid biosynthesis MESO      | -0.287001973 |
| UCKL1 | Fatty acid degradation MESO       | -0.034557148 |
| UCKL1 | Fatty acid elongation MESO        | 0.059783844  |
| UCKL1 | Fibroblast MESO                   | -0.252009118 |
| UCKL1 | Folate biosynthesis MESO          | 0.233337074  |
| UCKL1 | Follicular b cell MESO            | -0.104463972 |
| UCKL1 | Follicular dendritic cell MESO    | -0.175166355 |
| UCKL1 | Follicular helper (tfh) t ce MESO | 0.013117929  |
| UCKL1 | Follicular t cell MESO            | 0.29256411   |
| UCKL1 | Foxp3+il-17+ t cell MESO          | 0.052292197  |
| UCKL1 | Fructose and mannose me MESO      | 0.176882553  |
| UCKL1 | G2m_checkpoint MESO               | -0.050519665 |
| UCKL1 | Galactose metabolism MESO         | -0.035331299 |
| UCKL1 | Galie_tumor_stemness_ge MESO      | -0.317381529 |
| UCKL1 | Glutathione metabolism MESO       | 0.20362833   |
| UCKL1 | Glycerolipid metabolism MESO      | -0.006267031 |
| UCKL1 | Glycerophospholipid met& MESO     | 0.079783154  |
| UCKL1 | Glycine, serine and threor MESO   | 0.075855551  |
| UCKL1 | Glycolysis / gluconeogene MESO    | -0.015379614 |
| UCKL1 | Glycosaminoglycan biosy MESO      | -0.173267571 |
| UCKL1 | Glycosaminoglycan biosy MESO      | -0.038862793 |
| UCKL1 | Glycosaminoglycan biosy MESO      | -0.26969545  |
| UCKL1 | Glycosaminoglycan degra MESO      | -0.196788396 |
| UCKL1 | Glycosphingolipid biosyn MESO     | -0.195641829 |
| UCKL1 | Glycosphingolipid biosyn MESO     | -0.227898265 |
| UCKL1 | Glycosphingolipid biosyn MESO     | -0.057822279 |
| UCKL1 | Glycosylphosphatidylinos: MESO    | 0.001575969  |
| UCKL1 | Glyoxylate and dicarboxy MESO     | 0.069604344  |
| UCKL1 | Granulocyte MESO                  | -0.12182876  |
| UCKL1 | Hedgehog_signaling MESO           | -0.22513943  |
| UCKL1 | Histidine metabolism MESO         | -0.033663656 |



|       |                             |      |              |
|-------|-----------------------------|------|--------------|
| UCKL1 | Hypoxia                     | MESO | -0.094896072 |
| UCKL1 | Il-17alpha t cell           | MESO | 0.055722533  |
| UCKL1 | Il2_stat5_signaling         | MESO | -0.140245577 |
| UCKL1 | Il6_jak_stat3_signaling     | MESO | -0.18609094  |
| UCKL1 | Immune_checkpoints_tun      | MESO | -0.025963146 |
| UCKL1 | Immune_inhibition_cytok     | MESO | -0.008610656 |
| UCKL1 | Inositol_phosphate_metabc   | MESO | -0.451750269 |
| UCKL1 | Interleukin_6_signaling     | MESO | -0.486946564 |
| UCKL1 | Jaeger_metastasis_up        | MESO | -0.139362411 |
| UCKL1 | Jain_nfkb_signaling         | MESO | -0.100114465 |
| UCKL1 | Kras_signaling_up           | MESO | -0.275771658 |
| UCKL1 | Linoleic acid metabolism    | MESO | 0.167847215  |
| UCKL1 | Lipoic acid metabolism      | MESO | 0.118464109  |
| UCKL1 | Lysine degradation          | MESO | -0.142281478 |
| UCKL1 | Lysosome                    | MESO | -0.146639792 |
| UCKL1 | M1 macrophage               | MESO | -0.048371839 |
| UCKL1 | M2 macrophage               | MESO | -0.110871585 |
| UCKL1 | Mannose type o-glycan bi    | MESO | -0.135193883 |
| UCKL1 | Mapk_signaling_pathway      | MESO | -0.203793327 |
| UCKL1 | Mapk3_erk1_activation       | MESO | -0.410944742 |
| UCKL1 | Marginal zone b cell        | MESO | -0.183969536 |
| UCKL1 | Memory b cell               | MESO | -0.08665299  |
| UCKL1 | Mesenchymal cell            | MESO | -0.063168617 |
| UCKL1 | Mesenchymal stem cell       | MESO | -0.217332992 |
| UCKL1 | Metabolism of xenobiotic    | MESO | 0.125444279  |
| UCKL1 | Migrating cancer stem cel   | MESO | -0.115227925 |
| UCKL1 | Mitotic_spindle             | MESO | -0.293935485 |
| UCKL1 | Monocyte                    | MESO | -0.095546059 |
| UCKL1 | Mtor_signaling_pathway      | MESO | -0.415564252 |
| UCKL1 | Mtorc1_signaling            | MESO | -0.097054593 |
| UCKL1 | Mucin type o-glycan biosy   | MESO | -0.525645603 |
| UCKL1 | Myc_targets_v1              | MESO | 0.243109765  |
| UCKL1 | Myeloid cell                | MESO | -0.117209261 |
| UCKL1 | N-glycan biosynthesis       | MESO | -0.319010419 |
| UCKL1 | Naive b cell                | MESO | 0.034401388  |
| UCKL1 | Naive cd4+ t cell           | MESO | -0.149998575 |
| UCKL1 | Naive cd8+ t cell           | MESO | -0.091448096 |
| UCKL1 | Natural killer cell         | MESO | 0.005064139  |
| UCKL1 | Natural killer t (nkt) cell | MESO | 0.075143298  |
| UCKL1 | Natural regulatory t (treg) | MESO | -0.05242179  |
| UCKL1 | Neomycin, kanamycin an      | MESO | -0.152342821 |
| UCKL1 | Neutrophil                  | MESO | -0.075801199 |
| UCKL1 | Nicotinate and nicotinami   | MESO | -0.149050979 |

|       |                            |      |              |
|-------|----------------------------|------|--------------|
| UCKL1 | Nitrogen metabolism        | MESO | 0.012280524  |
| UCKL1 | Nod_like_receptor_signal   | MESO | -0.259929741 |
| UCKL1 | Notch_signaling            | MESO | -0.078313847 |
| UCKL1 | One carbon pool by folate  | MESO | 0.121376038  |
| UCKL1 | Other glycan degradation   | MESO | -0.160244298 |
| UCKL1 | Other types of o-glycan b  | MESO | -0.219879775 |
| UCKL1 | Oxidative phosphorylatio   | MESO | 0.308218009  |
| UCKL1 | P53_pathway                | MESO | 0.088454064  |
| UCKL1 | P53_signaling_pathway      | MESO | -0.073714506 |
| UCKL1 | Pantothenate and coa bios  | MESO | 0.091599221  |
| UCKL1 | Pentose and glucuronate in | MESO | 0.019007449  |
| UCKL1 | Pentose phosphate pathwa   | MESO | 0.148362988  |
| UCKL1 | Pericyte                   | MESO | -0.069231537 |
| UCKL1 | Phenylalanine metabolism   | MESO | -0.009663622 |
| UCKL1 | Phenylalanine, tyrosine ar | MESO | 0.148419399  |
| UCKL1 | Phosphonate and phosphir   | MESO | -0.033892366 |
| UCKL1 | Pi3k_akt_activation        | MESO | -0.251395915 |
| UCKL1 | Pi3k_akt_mtor_signaling    | MESO | -0.124101616 |
| UCKL1 | Porphyrin and chlorophyl   | MESO | 0.003589024  |
| UCKL1 | Primary bile acid biosynt  | MESO | -0.147773346 |
| UCKL1 | Propanoate metabolism      | MESO | -0.136333133 |
| UCKL1 | Purine metabolism          | MESO | 0.196399011  |
| UCKL1 | Pyrimidine metabolism      | MESO | 0.260922252  |
| UCKL1 | Pyruvate metabolism        | MESO | 0.05202165   |
| UCKL1 | Regulation_of_autophagy    | MESO | 0.025342332  |
| UCKL1 | Retinol metabolism         | MESO | 0.069274243  |
| UCKL1 | Riboflavin metabolism      | MESO | 0.26927898   |
| UCKL1 | Schmahl_pdgf_signaling     | MESO | -0.335005449 |
| UCKL1 | Selenocompound metabol     | MESO | -0.378363521 |
| UCKL1 | Signaling_by_hippo         | MESO | -0.274703771 |
| UCKL1 | Sphingolipid metabolism    | MESO | -0.427240352 |
| UCKL1 | Starch and sucrose metabo  | MESO | -0.090745093 |
| UCKL1 | Steroid biosynthesis       | MESO | -0.00726774  |
| UCKL1 | Steroid hormone biosynth   | MESO | 0.063259289  |
| UCKL1 | Sulfur metabolism          | MESO | 0.028776555  |
| UCKL1 | Synthesis and degradation  | MESO | 0.32693646   |
| UCKL1 | T helper cell              | MESO | -0.040722807 |
| UCKL1 | T helper1 (th1) cell       | MESO | 0.005928841  |
| UCKL1 | T helper17 (th17) cell     | MESO | -0.141359976 |
| UCKL1 | T helper2 (th2) cell       | MESO | -0.079116995 |
| UCKL1 | T helper9 (th9) cell       | MESO | 0.071521879  |
| UCKL1 | Taurine and hypotaurine r  | MESO | 0.261336325  |
| UCKL1 | Terpenoid backbone biosy   | MESO | 0.150541489  |

|       |                            |      |              |
|-------|----------------------------|------|--------------|
| UCKL1 | Tgf_beta_signaling_pathw   | MESO | -0.219975321 |
| UCKL1 | Thiamine metabolism        | MESO | 0.221078776  |
| UCKL1 | Tnfa_signaling_via_nfkb    | MESO | -0.195553197 |
| UCKL1 | Tryptophan metabolism      | MESO | 0.003223211  |
| UCKL1 | Tumor endothelial cell     | MESO | -0.098373992 |
| UCKL1 | Tyrosine metabolism        | MESO | 0.078126559  |
| UCKL1 | Ubiquinone and other terf  | MESO | 0.12748636   |
| UCKL1 | Valine, leucine and isoleu | MESO | 0.099175674  |
| UCKL1 | Valine, leucine and isoleu | MESO | 0.016408323  |
| UCKL1 | Vascular endothelial cell  | MESO | -0.119133075 |
| UCKL1 | Vascular smooth muscle c   | MESO | -0.159388044 |
| UCKL1 | Vegf_signaling_pathway     | MESO | -0.059633167 |
| UCKL1 | Vitamin b6 metabolism      | MESO | 0.030116151  |
| UCKL1 | Willert_wnt_signaling      | MESO | 0.041064485  |
| UCKL1 | Wnt_beta_catenin_signali   | MESO | -0.009269374 |
| UPP1  | Abnormal plasma cell       | MESO | 0.274864157  |
| UPP1  | Activated b cell           | MESO | 0.333586781  |
| UPP1  | Activated cd4+ t cell      | MESO | 0.334779212  |
| UPP1  | Activated t cell           | MESO | 0.385961272  |
| UPP1  | Alanine, aspartate and glu | MESO | 0.141744806  |
| UPP1  | Alcala_apoptosis           | MESO | 0.245086528  |
| UPP1  | Alpha-linolenic acid meta  | MESO | 0.20628219   |
| UPP1  | Amino sugar and nucleoti   | MESO | 0.440976635  |
| UPP1  | Ampk_pathway               | MESO | -0.165056882 |
| UPP1  | Angiogenesis               | MESO | 0.343098281  |
| UPP1  | Arachidonic acid metaboli  | MESO | 0.274784402  |
| UPP1  | Arginine and proline met   | MESO | 0.376135828  |
| UPP1  | Arginine biosynthesis      | MESO | 0.351483816  |
| UPP1  | Ascorbate and aldarate m   | MESO | 0.058598087  |
| UPP1  | Atypical memory b cell     | MESO | 0.229446891  |
| UPP1  | Axl+siglec6+ dendritic ce  | MESO | 0.294305121  |
| UPP1  | B cell                     | MESO | 0.287531941  |
| UPP1  | B1 cell                    | MESO | 0.308513941  |
| UPP1  | Basal cell                 | MESO | 0.490493559  |
| UPP1  | Beta-alanine metabolism    | MESO | -0.050009791 |
| UPP1  | Biosynthesis of unsaturate | MESO | 0.318415145  |
| UPP1  | Biotin metabolism          | MESO | -0.051089131 |
| UPP1  | Butanoate metabolism       | MESO | 0.065479226  |
| UPP1  | Caffeine metabolism        | MESO | -0.067055241 |
| UPP1  | Cancer stem cell           | MESO | 0.206482552  |
| UPP1  | Cancer stem-like cell      | MESO | 0.136279952  |
| UPP1  | Cd4+ cytotoxic t cell      | MESO | 0.47079328   |
| UPP1  | Cd4+ memory t cell         | MESO | 0.294517304  |

|      |                              |      |              |
|------|------------------------------|------|--------------|
| UPP1 | Cd4+ regulatory t cell       | MESO | 0.31475176   |
| UPP1 | Cd4+ t helper cell           | MESO | 0.280779112  |
| UPP1 | Cd4+cd25+ regulatory t c     | MESO | 0.312294275  |
| UPP1 | Cd8+ cytotoxic t cell        | MESO | 0.37883793   |
| UPP1 | Cd8+ regulatory t cell       | MESO | 0.368801386  |
| UPP1 | Cell_cycle                   | MESO | 0.160031034  |
| UPP1 | Chandran_metastasis_top      | MESO | -0.181601965 |
| UPP1 | Citrate cycle (tca cycle)    | MESO | -0.005352749 |
| UPP1 | Cysteine and methionine r    | MESO | 0.210774751  |
| UPP1 | Cytokine induced killer c    | MESO | 0.177652759  |
| UPP1 | D-arginine and d-ornithin    | MESO | -0.015874993 |
| UPP1 | D-glutamine and d-glutan     | MESO | -0.225499677 |
| UPP1 | Dendritic cell               | MESO | 0.401090938  |
| UPP1 | Dna_repair                   | MESO | 0.210209833  |
| UPP1 | Dna_replication              | MESO | 0.174592306  |
| UPP1 | Double-negative memory       | MESO | 0.233784932  |
| UPP1 | Drug metabolism - cytoch     | MESO | 0.043528163  |
| UPP1 | Drug metabolism - other      | MESO | 0.381537134  |
| UPP1 | E2f_targets                  | MESO | 0.158894472  |
| UPP1 | Ecm_receptor_interaction     | MESO | 0.159850901  |
| UPP1 | Effector cd4+ memory t (     | MESO | 0.223307909  |
| UPP1 | Effector cd8+ memory t (     | MESO | 0.494470785  |
| UPP1 | Effector memory t cell       | MESO | 0.283143045  |
| UPP1 | Effector regulatory t (treg  | MESO | 0.251830579  |
| UPP1 | Elvidge_hif1a_targets_up     | MESO | 0.18507747   |
| UPP1 | Endothelial cell             | MESO | 0.217241802  |
| UPP1 | Eosinophil                   | MESO | 0.453657354  |
| UPP1 | Ether lipid metabolism       | MESO | 0.225718407  |
| UPP1 | Exhausted cd4+ t cell        | MESO | 0.36128975   |
| UPP1 | Exhausted cd8+ t cell        | MESO | 0.409516046  |
| UPP1 | Exhausted t cell             | MESO | 0.342271741  |
| UPP1 | Fat cell (adipocyte)         | MESO | 0.215780189  |
| UPP1 | Fatty acid biosynthesis      | MESO | 0.024213191  |
| UPP1 | Fatty acid degradation       | MESO | -0.142347283 |
| UPP1 | Fatty acid elongation        | MESO | 0.163197681  |
| UPP1 | Fibroblast                   | MESO | 0.217657073  |
| UPP1 | Folate biosynthesis          | MESO | 0.306079567  |
| UPP1 | Follicular b cell            | MESO | 0.245483974  |
| UPP1 | Follicular dendritic cell    | MESO | 0.255721749  |
| UPP1 | Follicular helper (tfh) t ce | MESO | 0.423051544  |
| UPP1 | Follicular t cell            | MESO | 0.347141578  |
| UPP1 | Foxp3+il-17+ t cell          | MESO | 0.201100561  |
| UPP1 | Fructose and mannose me      | MESO | 0.444443002  |

|      |                            |      |              |
|------|----------------------------|------|--------------|
| UPP1 | G2m_checkpoint             | MESO | 0.109373391  |
| UPP1 | Galactose metabolism       | MESO | 0.558454827  |
| UPP1 | Galie_tumor_stemness_ge    | MESO | -0.287220724 |
| UPP1 | Glutathione metabolism     | MESO | 0.46783752   |
| UPP1 | Glycerolipid metabolism    | MESO | 0.596316221  |
| UPP1 | Glycerophospholipid met&   | MESO | 0.449422197  |
| UPP1 | Glycine, serine and threor | MESO | 0.312594634  |
| UPP1 | Glycolysis / gluconeogene  | MESO | 0.221533266  |
| UPP1 | Glycosaminoglycan biosy    | MESO | 0.217070645  |
| UPP1 | Glycosaminoglycan biosy    | MESO | -0.06084276  |
| UPP1 | Glycosaminoglycan biosy    | MESO | 0.260657252  |
| UPP1 | Glycosaminoglycan degra    | MESO | 0.225441629  |
| UPP1 | Glycosphingolipid biosyn   | MESO | 0.388363595  |
| UPP1 | Glycosphingolipid biosyn   | MESO | 0.333087285  |
| UPP1 | Glycosphingolipid biosyn   | MESO | 0.220242471  |
| UPP1 | Glycosylphosphatidylinos   | MESO | -0.063993602 |
| UPP1 | Glyoxylate and dicarboxy   | MESO | 0.079320823  |
| UPP1 | Granulocyte                | MESO | 0.390670635  |
| UPP1 | Hedgehog_signaling         | MESO | -0.092976809 |
| UPP1 | Histidine metabolism       | MESO | -0.033576052 |
| UPP1 | Hypoxia                    | MESO | 0.571273326  |
| UPP1 | Il-17alpha t cell          | MESO | 0.329340916  |
| UPP1 | Il2_stat5_signaling        | MESO | 0.500571902  |
| UPP1 | Il6_jak_stat3_signaling    | MESO | 0.413876844  |
| UPP1 | Immune_checkpoints_tun     | MESO | 0.377386028  |
| UPP1 | Immune_inhibition_cytok    | MESO | 0.50964602   |
| UPP1 | Inositol phosphate metabo  | MESO | -0.242866335 |
| UPP1 | Interleukin_6_signaling    | MESO | -0.060137714 |
| UPP1 | Jaeger_metastasis_up       | MESO | 0.335013509  |
| UPP1 | Jain_nfkb_signaling        | MESO | 0.129469272  |
| UPP1 | Kras_signaling_up          | MESO | 0.360524276  |
| UPP1 | Linoleic acid metabolism   | MESO | 0.083292532  |
| UPP1 | Lipoic acid metabolism     | MESO | -0.21832635  |
| UPP1 | Lysine degradation         | MESO | -0.374324771 |
| UPP1 | Lysosome                   | MESO | 0.41562971   |
| UPP1 | M1 macrophage              | MESO | 0.422908576  |
| UPP1 | M2 macrophage              | MESO | 0.420840236  |
| UPP1 | Mannose type o-glycan bi   | MESO | 0.121171031  |
| UPP1 | Mapk_signaling_pathway     | MESO | 0.320757926  |
| UPP1 | Mapk3_erk1_activation      | MESO | -0.039923121 |
| UPP1 | Marginal zone b cell       | MESO | 0.136059545  |
| UPP1 | Memory b cell              | MESO | 0.143168847  |
| UPP1 | Mesenchymal cell           | MESO | 0.254241192  |

|      |                             |      |              |
|------|-----------------------------|------|--------------|
| UPP1 | Mesenchymal stem cell       | MESO | 0.313789088  |
| UPP1 | Metabolism of xenobiotic    | MESO | 0.099785975  |
| UPP1 | Migrating cancer stem cel   | MESO | -0.006036955 |
| UPP1 | Mitotic_spindle             | MESO | -0.11873714  |
| UPP1 | Monocyte                    | MESO | 0.535498753  |
| UPP1 | Mtor_signaling_pathway      | MESO | -0.164272878 |
| UPP1 | Mtorc1_signaling            | MESO | 0.507121848  |
| UPP1 | Mucin type o-glycan bios    | MESO | 0.022553657  |
| UPP1 | Myc_targets_v1              | MESO | 0.254546874  |
| UPP1 | Myeloid cell                | MESO | 0.38111251   |
| UPP1 | N-glycan biosynthesis       | MESO | 0.044112785  |
| UPP1 | Naive b cell                | MESO | 0.355984507  |
| UPP1 | Naive cd4+ t cell           | MESO | -0.007694276 |
| UPP1 | Naive cd8+ t cell           | MESO | -0.135077994 |
| UPP1 | Natural killer cell         | MESO | 0.417735254  |
| UPP1 | Natural killer t (nkt) cell | MESO | 0.354419547  |
| UPP1 | Natural regulatory t (treg) | MESO | 0.356405466  |
| UPP1 | Neomycin, kanamycin an      | MESO | 0.576728565  |
| UPP1 | Neutrophil                  | MESO | 0.589775134  |
| UPP1 | Nicotinate and nicotinami   | MESO | 0.271413667  |
| UPP1 | Nitrogen metabolism         | MESO | 0.095346122  |
| UPP1 | Nod_like_receptor_signal    | MESO | 0.273943019  |
| UPP1 | Notch_signaling             | MESO | 0.135380205  |
| UPP1 | One carbon pool by folate   | MESO | 0.086452136  |
| UPP1 | Other glycan degradation    | MESO | 0.097439594  |
| UPP1 | Other types of o-glycan b   | MESO | 0.027790979  |
| UPP1 | Oxidative phosphorylatio    | MESO | 0.267247639  |
| UPP1 | P53_pathway                 | MESO | 0.510667686  |
| UPP1 | P53_signaling_pathway       | MESO | 0.205057193  |
| UPP1 | Pantothenate and coa bios   | MESO | 0.138521055  |
| UPP1 | Pentose and glucuronate i   | MESO | 0.256784389  |
| UPP1 | Pentose phosphate pathwa    | MESO | 0.440994044  |
| UPP1 | Pericyte                    | MESO | 0.256359398  |
| UPP1 | Phenylalanine metabolism    | MESO | 0.343266299  |
| UPP1 | Phenylalanine, tyrosine ar  | MESO | 0.240292108  |
| UPP1 | Phosphonate and phosphir    | MESO | 0.38206071   |
| UPP1 | Pi3k_akt_activation         | MESO | -0.294150325 |
| UPP1 | Pi3k_akt_mtor_signaling     | MESO | 0.280408217  |
| UPP1 | Porphyrin and chlorophyl    | MESO | 0.291691448  |
| UPP1 | Primary bile acid biosynt   | MESO | -0.100527159 |
| UPP1 | Propanoate metabolism       | MESO | -0.280822214 |
| UPP1 | Purine metabolism           | MESO | 0.249153132  |
| UPP1 | Pyrimidine metabolism       | MESO | 0.267376499  |

|      |                            |      |              |
|------|----------------------------|------|--------------|
| UPP1 | Pyruvate metabolism        | MESO | 0.016960937  |
| UPP1 | Regulation_of_autophagy    | MESO | -0.038676942 |
| UPP1 | Retinol metabolism         | MESO | 0.025533081  |
| UPP1 | Riboflavin metabolism      | MESO | 0.342781537  |
| UPP1 | Schmahl_pdgf_signaling     | MESO | 0.068009744  |
| UPP1 | Selenocompound metabol     | MESO | -0.027894259 |
| UPP1 | Signaling_by_hippo         | MESO | -0.217230972 |
| UPP1 | Sphingolipid metabolism    | MESO | 0.238278302  |
| UPP1 | Starch and sucrose metabo  | MESO | 0.371061337  |
| UPP1 | Steroid biosynthesis       | MESO | 0.439390771  |
| UPP1 | Steroid hormone biosynth   | MESO | 0.143340273  |
| UPP1 | Sulfur metabolism          | MESO | -0.101826149 |
| UPP1 | Synthesis and degradation  | MESO | 0.318948322  |
| UPP1 | T helper cell              | MESO | 0.35851889   |
| UPP1 | T helper1 (th1) cell       | MESO | 0.387720727  |
| UPP1 | T helper17 (th17) cell     | MESO | 0.416964233  |
| UPP1 | T helper2 (th2) cell       | MESO | 0.42074389   |
| UPP1 | T helper9 (th9) cell       | MESO | 0.335261462  |
| UPP1 | Taurine and hypotaurine r  | MESO | -0.11579969  |
| UPP1 | Terpenoid backbone biosy   | MESO | 0.231883209  |
| UPP1 | Tgf_beta_signaling_pathw   | MESO | -0.122632999 |
| UPP1 | Thiamine metabolism        | MESO | 0.076953409  |
| UPP1 | Tnfa_signaling_via_nfk     | MESO | 0.444990054  |
| UPP1 | Tryptophan metabolism      | MESO | 0.171787501  |
| UPP1 | Tumor endothelial cell     | MESO | 0.315035105  |
| UPP1 | Tyrosine metabolism        | MESO | 0.087543227  |
| UPP1 | Ubiquinone and other ter   | MESO | 0.054973269  |
| UPP1 | Valine, leucine and isoleu | MESO | 0.491389278  |
| UPP1 | Valine, leucine and isoleu | MESO | -0.152827859 |
| UPP1 | Vascular endothelial cell  | MESO | 0.241767167  |
| UPP1 | Vascular smooth muscle c   | MESO | 0.23917403   |
| UPP1 | Vegf_signaling_pathway     | MESO | 0.370226838  |
| UPP1 | Vitamin b6 metabolism      | MESO | 0.031898531  |
| UPP1 | Willert_wnt_signaling      | MESO | 0.350788755  |
| UPP1 | Wnt_beta_catenin_signali   | MESO | -0.021360336 |
| UPP2 | Abnormal plasma cell       | MESO | -0.14920227  |
| UPP2 | Activated b cell           | MESO | -0.058284393 |
| UPP2 | Activated cd4+ t cell      | MESO | -0.094042775 |
| UPP2 | Activated t cell           | MESO | -0.097617293 |
| UPP2 | Alanine, aspartate and glu | MESO | -0.143761327 |
| UPP2 | Alcala_apoptosis           | MESO | -0.165284837 |
| UPP2 | Alpha-linolenic acid meta  | MESO | 0.030436007  |
| UPP2 | Amino sugar and nucleoti   | MESO | -0.14123226  |

|      |                                         |      |              |
|------|-----------------------------------------|------|--------------|
| UPP2 | Ampk_pathway                            | MESO | -0.040591832 |
| UPP2 | Angiogenesis                            | MESO | -0.254710683 |
| UPP2 | Arachidonic acid metabolism             | MESO | 0.094200485  |
| UPP2 | Arginine and proline metabolism         | MESO | -0.211458359 |
| UPP2 | Arginine biosynthesis                   | MESO | -0.243026743 |
| UPP2 | Ascorbate and aldarate metabolism       | MESO | -0.105560564 |
| UPP2 | Atypical memory B cell                  | MESO | -0.140645216 |
| UPP2 | Axl+siglec6+ dendritic cell             | MESO | -0.105131119 |
| UPP2 | B cell                                  | MESO | -0.058715981 |
| UPP2 | B1 cell                                 | MESO | -0.044624088 |
| UPP2 | Basal cell                              | MESO | -0.248533814 |
| UPP2 | Beta-alanine metabolism                 | MESO | 0.119783379  |
| UPP2 | Biosynthesis of unsaturated fatty acids | MESO | -0.355189167 |
| UPP2 | Biotin metabolism                       | MESO | -0.039469517 |
| UPP2 | Butanoate metabolism                    | MESO | 0.124951619  |
| UPP2 | Caffeine metabolism                     | MESO | -0.019733919 |
| UPP2 | Cancer stem cell                        | MESO | -0.229346522 |
| UPP2 | Cancer stem-like cell                   | MESO | -0.111642485 |
| UPP2 | Cd4+ cytotoxic T cell                   | MESO | -0.062583569 |
| UPP2 | Cd4+ memory T cell                      | MESO | -0.13015553  |
| UPP2 | Cd4+ regulatory T cell                  | MESO | -0.01947323  |
| UPP2 | Cd4+ T helper cell                      | MESO | -0.021293274 |
| UPP2 | Cd4+cd25+ regulatory T cell             | MESO | -0.029492876 |
| UPP2 | Cd8+ cytotoxic T cell                   | MESO | -0.038653345 |
| UPP2 | Cd8+ regulatory T cell                  | MESO | -0.075735514 |
| UPP2 | Cell cycle                              | MESO | -0.157528139 |
| UPP2 | Chandran_metastasis_top5                | MESO | -0.102737707 |
| UPP2 | Citrate cycle (TCA cycle)               | MESO | -0.142639378 |
| UPP2 | Cysteine and methionine metabolism      | MESO | -0.130301849 |
| UPP2 | Cytokine induced killer cell            | MESO | -0.041836523 |
| UPP2 | D-arginine and D-ornithine              | MESO | 0.062981636  |
| UPP2 | D-glutamine and D-glutamate             | MESO | -0.201110359 |
| UPP2 | Dendritic cell                          | MESO | -0.151103479 |
| UPP2 | DNA repair                              | MESO | -0.065701043 |
| UPP2 | DNA replication                         | MESO | -0.192447798 |
| UPP2 | Double-negative memory T cell           | MESO | -0.0471405   |
| UPP2 | Drug metabolism - cytochrome P450       | MESO | -0.000312894 |
| UPP2 | Drug metabolism - other                 | MESO | -0.041456723 |
| UPP2 | E2f targets                             | MESO | -0.203469943 |
| UPP2 | ECM receptor interaction                | MESO | -0.194786827 |
| UPP2 | Effector CD4+ memory T cell             | MESO | -0.08860191  |
| UPP2 | Effector CD8+ memory T cell             | MESO | -0.131737333 |
| UPP2 | Effector memory T cell                  | MESO | -0.061267149 |



|      |                              |      |              |
|------|------------------------------|------|--------------|
| UPP2 | Effector regulatory t (treg) | MESO | -0.050050139 |
| UPP2 | Elvidge_hif1a_targets_up     | MESO | -0.417306362 |
| UPP2 | Endothelial cell             | MESO | -0.208673365 |
| UPP2 | Eosinophil                   | MESO | -0.13537017  |
| UPP2 | Ether lipid metabolism       | MESO | 0.088126928  |
| UPP2 | Exhausted cd4+ t cell        | MESO | -0.062325702 |
| UPP2 | Exhausted cd8+ t cell        | MESO | -0.059994622 |
| UPP2 | Exhausted t cell             | MESO | 0.005024168  |
| UPP2 | Fat cell (adipocyte)         | MESO | -0.212779041 |
| UPP2 | Fatty acid biosynthesis      | MESO | -0.012795926 |
| UPP2 | Fatty acid degradation       | MESO | 0.024856382  |
| UPP2 | Fatty acid elongation        | MESO | -0.186609615 |
| UPP2 | Fibroblast                   | MESO | -0.109057897 |
| UPP2 | Folate biosynthesis          | MESO | -0.07523309  |
| UPP2 | Follicular b cell            | MESO | -0.115902366 |
| UPP2 | Follicular dendritic cell    | MESO | -0.167839175 |
| UPP2 | Follicular helper (tfh) t ce | MESO | -0.106976086 |
| UPP2 | Follicular t cell            | MESO | 0.148439688  |
| UPP2 | Foxp3+il-17+ t cell          | MESO | 0.01701935   |
| UPP2 | Fructose and mannose me      | MESO | -0.156352965 |
| UPP2 | G2m_checkpoint               | MESO | -0.222951419 |
| UPP2 | Galactose metabolism         | MESO | -0.237128331 |
| UPP2 | Galie_tumor_stemness_ge      | MESO | -0.138254382 |
| UPP2 | Glutathione metabolism       | MESO | -0.021034509 |
| UPP2 | Glycerolipid metabolism      | MESO | -0.257835435 |
| UPP2 | Glycerophospholipid metæ     | MESO | 0.013532245  |
| UPP2 | Glycine, serine and threor   | MESO | -0.165014724 |
| UPP2 | Glycolysis / gluconeogene    | MESO | -0.163039667 |
| UPP2 | Glycosaminoglycan biosy      | MESO | -0.100897959 |
| UPP2 | Glycosaminoglycan biosy      | MESO | -0.052646674 |
| UPP2 | Glycosaminoglycan biosy      | MESO | -0.204159686 |
| UPP2 | Glycosaminoglycan degra      | MESO | -0.185986977 |
| UPP2 | Glycosphingolipid biosyn     | MESO | -0.012337796 |
| UPP2 | Glycosphingolipid biosyn     | MESO | -0.120029189 |
| UPP2 | Glycosphingolipid biosyn     | MESO | -0.025193139 |
| UPP2 | Glycosylphosphatidylinos     | MESO | -0.12302397  |
| UPP2 | Glyoxylate and dicarboxy     | MESO | -0.028786989 |
| UPP2 | Granulocyte                  | MESO | -0.122136989 |
| UPP2 | Hedgehog_signaling           | MESO | -0.103154715 |
| UPP2 | Histidine metabolism         | MESO | 0.019760688  |
| UPP2 | Hypoxia                      | MESO | -0.226610358 |
| UPP2 | Il-17ralpha t cell           | MESO | -0.074224095 |
| UPP2 | Il2_stat5_signaling          | MESO | -0.239782983 |

|      |                             |      |              |
|------|-----------------------------|------|--------------|
| UPP2 | Il6_jak_stat3_signaling     | MESO | -0.218761249 |
| UPP2 | Immune_checkpoints_tun      | MESO | -0.213367167 |
| UPP2 | Immune_inhibition_cytok     | MESO | -0.115831513 |
| UPP2 | Inositol phosphate metabo   | MESO | -0.093605467 |
| UPP2 | Interleukin_6_signaling     | MESO | -0.183231923 |
| UPP2 | Jaeger_metastasis_up        | MESO | -0.097665052 |
| UPP2 | Jain_nfkb_signaling         | MESO | -0.141295433 |
| UPP2 | Kras_signaling_up           | MESO | -0.260621789 |
| UPP2 | Linoleic acid metabolism    | MESO | 0.090427464  |
| UPP2 | Lipoic acid metabolism      | MESO | 0.257012912  |
| UPP2 | Lysine degradation          | MESO | -0.020800964 |
| UPP2 | Lysosome                    | MESO | -0.110896571 |
| UPP2 | M1 macrophage               | MESO | -0.084037244 |
| UPP2 | M2 macrophage               | MESO | -0.130896049 |
| UPP2 | Mannose type o-glycan bi    | MESO | -0.130568537 |
| UPP2 | Mapk_signaling_pathway      | MESO | -0.184097516 |
| UPP2 | Mapk3_erk1_activation       | MESO | -0.183417941 |
| UPP2 | Marginal zone b cell        | MESO | -0.130302364 |
| UPP2 | Memory b cell               | MESO | -0.040578562 |
| UPP2 | Mesenchymal cell            | MESO | -0.123041996 |
| UPP2 | Mesenchymal stem cell       | MESO | -0.16255115  |
| UPP2 | Metabolism of xenobiotic    | MESO | 0.016337459  |
| UPP2 | Migrating cancer stem cel   | MESO | -0.102468225 |
| UPP2 | Mitotic_spindle             | MESO | -0.190148948 |
| UPP2 | Monocyte                    | MESO | -0.149466845 |
| UPP2 | Mtor_signaling_pathway      | MESO | 0.051760746  |
| UPP2 | Mtorc1_signaling            | MESO | -0.35519632  |
| UPP2 | Mucin type o-glycan biosy   | MESO | -0.278990008 |
| UPP2 | Myc_targets_v1              | MESO | -0.184459335 |
| UPP2 | Myeloid cell                | MESO | -0.132572142 |
| UPP2 | N-glycan biosynthesis       | MESO | -0.283204483 |
| UPP2 | Naive b cell                | MESO | -0.158781789 |
| UPP2 | Naive cd4+ t cell           | MESO | -0.018237344 |
| UPP2 | Naive cd8+ t cell           | MESO | 0.080497136  |
| UPP2 | Natural killer cell         | MESO | -0.07580278  |
| UPP2 | Natural killer t (nkt) cell | MESO | -0.100399849 |
| UPP2 | Natural regulatory t (treg) | MESO | -0.057815205 |
| UPP2 | Neomycin, kanamycin and     | MESO | -0.243950569 |
| UPP2 | Neutrophil                  | MESO | -0.220090452 |
| UPP2 | Nicotinate and nicotinami   | MESO | -0.133503069 |
| UPP2 | Nitrogen metabolism         | MESO | -0.048620443 |
| UPP2 | Nod_like_receptor_signal    | MESO | -0.209427126 |
| UPP2 | Notch_signaling             | MESO | -0.155083218 |

|      |                            |      |              |
|------|----------------------------|------|--------------|
| UPP2 | One carbon pool by folate  | MESO | -0.086666139 |
| UPP2 | Other glycan degradation   | MESO | 0.099794573  |
| UPP2 | Other types of o-glycan b  | MESO | 0.054665807  |
| UPP2 | Oxidative phosphorylation  | MESO | -0.017539216 |
| UPP2 | P53_pathway                | MESO | -0.140245624 |
| UPP2 | P53_signaling_pathway      | MESO | -0.118661418 |
| UPP2 | Pantothenate and coa bios  | MESO | 0.184175995  |
| UPP2 | Pentose and glucuronate i  | MESO | -0.046909512 |
| UPP2 | Pentose phosphate pathwa   | MESO | -0.209307031 |
| UPP2 | Pericyte                   | MESO | -0.099348481 |
| UPP2 | Phenylalanine metabolism   | MESO | 0.006746008  |
| UPP2 | Phenylalanine, tyrosine ar | MESO | -0.107671844 |
| UPP2 | Phosphonate and phosphir   | MESO | -0.061196816 |
| UPP2 | Pi3k_akt_activation        | MESO | -0.061277783 |
| UPP2 | Pi3k_akt_mtor_signaling    | MESO | -0.247196823 |
| UPP2 | Porphyrin and chlorophyl   | MESO | -0.246750222 |
| UPP2 | Primary bile acid biosynt  | MESO | 0.103099685  |
| UPP2 | Propanoate metabolism      | MESO | -0.046816371 |
| UPP2 | Purine metabolism          | MESO | -0.190469358 |
| UPP2 | Pyrimidine metabolism      | MESO | -0.107586544 |
| UPP2 | Pyruvate metabolism        | MESO | -0.129973288 |
| UPP2 | Regulation_of_autophagy    | MESO | -0.058450968 |
| UPP2 | Retinol metabolism         | MESO | -0.025583592 |
| UPP2 | Riboflavin metabolism      | MESO | -0.040642491 |
| UPP2 | Schmahl_pdgf_signaling     | MESO | -0.24070301  |
| UPP2 | Selenocompound metabol     | MESO | -0.262296057 |
| UPP2 | Signaling_by_hippo         | MESO | -0.090551765 |
| UPP2 | Sphingolipid metabolism    | MESO | -0.257774982 |
| UPP2 | Starch and sucrose metabo  | MESO | -0.03895977  |
| UPP2 | Steroid biosynthesis       | MESO | -0.346778375 |
| UPP2 | Steroid hormone biosynth   | MESO | -0.054693999 |
| UPP2 | Sulfur metabolism          | MESO | 0.000437745  |
| UPP2 | Synthesis and degradation  | MESO | 0.081205092  |
| UPP2 | T helper cell              | MESO | -0.082704119 |
| UPP2 | T helper1 (th1) cell       | MESO | -0.049580337 |
| UPP2 | T helper17 (th17) cell     | MESO | -0.128377314 |
| UPP2 | T helper2 (th2) cell       | MESO | -0.155191673 |
| UPP2 | T helper9 (th9) cell       | MESO | -0.024973189 |
| UPP2 | Taurine and hypotaurine r  | MESO | 0.261022582  |
| UPP2 | Terpenoid backbone biosy   | MESO | -0.034168987 |
| UPP2 | Tgf_beta_signaling_pathw   | MESO | -0.095132138 |
| UPP2 | Thiamine metabolism        | MESO | 0.01116981   |
| UPP2 | Tnfa_signaling_via_nfkb    | MESO | -0.274581267 |

|      |                            |      |              |
|------|----------------------------|------|--------------|
| UPP2 | Tryptophan metabolism      | MESO | -0.096596566 |
| UPP2 | Tumor endothelial cell     | MESO | -0.276337606 |
| UPP2 | Tyrosine metabolism        | MESO | 0.063610673  |
| UPP2 | Ubiquinone and other ter   | MESO | 0.060588529  |
| UPP2 | Valine, leucine and isoleu | MESO | 0.127589665  |
| UPP2 | Valine, leucine and isoleu | MESO | 0.014251604  |
| UPP2 | Vascular endothelial cell  | MESO | -0.026701616 |
| UPP2 | Vascular smooth muscle c   | MESO | -0.05187858  |
| UPP2 | Vegf_signaling_pathway     | MESO | -0.136411523 |
| UPP2 | Vitamin b6 metabolism      | MESO | -0.055835587 |
| UPP2 | Willert_wnt_signaling      | MESO | -0.302403589 |
| UPP2 | Wnt_beta_catenin_signali   | MESO | -0.02514599  |
| CDA  | Abnormal plasma cell       | OV   | 0.156219771  |
| CDA  | Activated b cell           | OV   | -0.00571874  |
| CDA  | Activated cd4+ t cell      | OV   | 0.024441281  |
| CDA  | Activated t cell           | OV   | 0.031831703  |
| CDA  | Alanine, aspartate and glu | OV   | -0.172673292 |
| CDA  | Alcala_apoptosis           | OV   | 0.031469101  |
| CDA  | Alpha-linolenic acid meta  | OV   | 0.011087669  |
| CDA  | Amino sugar and nucleoti   | OV   | 0.081371952  |
| CDA  | Ampk_pathway               | OV   | -0.139869359 |
| CDA  | Angiogenesis               | OV   | 0.276284749  |
| CDA  | Arachidonic acid metabol   | OV   | 0.228743469  |
| CDA  | Arginine and proline metæ  | OV   | 0.148998269  |
| CDA  | Arginine biosynthesis      | OV   | 0.019933608  |
| CDA  | Ascorbate and aldarate mæ  | OV   | -0.09179793  |
| CDA  | Atypical memory b cell     | OV   | 0.031715462  |
| CDA  | Axl+siglec6+ dendritic ce  | OV   | 0.235304263  |
| CDA  | B cell                     | OV   | -0.013282588 |
| CDA  | B1 cell                    | OV   | -0.05041242  |
| CDA  | Basal cell                 | OV   | 0.367511162  |
| CDA  | Beta-alanine metabolism    | OV   | 0.036997177  |
| CDA  | Biosynthesis of unsaturate | OV   | 0.043422485  |
| CDA  | Biotin metabolism          | OV   | -0.096006554 |
| CDA  | Butanoate metabolism       | OV   | -0.141311915 |
| CDA  | Caffeine metabolism        | OV   | -0.0459187   |
| CDA  | Cancer stem cell           | OV   | 0.195028955  |
| CDA  | Cancer stem-like cell      | OV   | -0.039290328 |
| CDA  | Cd4+ cytotoxic t cell      | OV   | 0.104975759  |
| CDA  | Cd4+ memory t cell         | OV   | -0.013029887 |
| CDA  | Cd4+ regulatory t cell     | OV   | 0.046969541  |
| CDA  | Cd4+ t helper cell         | OV   | 0.028922387  |
| CDA  | Cd4+cd25+ regulatory t c   | OV   | 0.037040203  |

|     |                              |    |              |
|-----|------------------------------|----|--------------|
| CDA | Cd8+ cytotoxic t cell        | OV | 0.008396146  |
| CDA | Cd8+ regulatory t cell       | OV | 0.113741669  |
| CDA | Cell_cycle                   | OV | -0.111816506 |
| CDA | Chandran_metastasis_top5     | OV | -0.201603409 |
| CDA | Citrate cycle (tca cycle)    | OV | -0.110925273 |
| CDA | Cysteine and methionine r    | OV | -0.11247666  |
| CDA | Cytokine induced killer c    | OV | 0.087283167  |
| CDA | D-arginine and d-ornithin    | OV | 0.064439171  |
| CDA | D-glutamine and d-glutan     | OV | -0.070415023 |
| CDA | Dendritic cell               | OV | 0.097841205  |
| CDA | Dna_repair                   | OV | -0.023518939 |
| CDA | Dna_replication              | OV | -0.091995964 |
| CDA | Double-negative memory       | OV | -0.061894707 |
| CDA | Drug metabolism - cytoch     | OV | 0.124303367  |
| CDA | Drug metabolism - other c    | OV | 0.073271846  |
| CDA | E2f_targets                  | OV | -0.13482608  |
| CDA | Ecm_receptor_interaction     | OV | 0.153391566  |
| CDA | Effector cd4+ memory t (     | OV | 0.029264859  |
| CDA | Effector cd8+ memory t (     | OV | 0.08966623   |
| CDA | Effector memory t cell       | OV | 0.044886541  |
| CDA | Effector regulatory t (treg  | OV | 0.054810545  |
| CDA | Elvidge_hif1a_targets_up     | OV | -0.014179981 |
| CDA | Endothelial cell             | OV | 0.24187073   |
| CDA | Eosinophil                   | OV | 0.089238455  |
| CDA | Ether lipid metabolism       | OV | 0.028141838  |
| CDA | Exhausted cd4+ t cell        | OV | 0.069621225  |
| CDA | Exhausted cd8+ t cell        | OV | 0.075322956  |
| CDA | Exhausted t cell             | OV | -0.006805802 |
| CDA | Fat cell (adipocyte)         | OV | 0.260391631  |
| CDA | Fatty acid biosynthesis      | OV | -0.100446342 |
| CDA | Fatty acid degradation       | OV | -0.0336444   |
| CDA | Fatty acid elongation        | OV | 0.046353805  |
| CDA | Fibroblast                   | OV | 0.227394285  |
| CDA | Folate biosynthesis          | OV | 0.073016749  |
| CDA | Follicular b cell            | OV | 0.051147372  |
| CDA | Follicular dendritic cell    | OV | 0.132715009  |
| CDA | Follicular helper (tfh) t ce | OV | 0.001690312  |
| CDA | Follicular t cell            | OV | 0.126921568  |
| CDA | Foxp3+il-17+ t cell          | OV | -0.059587949 |
| CDA | Fructose and mannose me      | OV | 0.012867913  |
| CDA | G2m_checkpoint               | OV | -0.152470291 |
| CDA | Galactose metabolism         | OV | 0.097638163  |
| CDA | Galie_tumor_stemness_ge      | OV | 0.320415688  |

|     |                                    |    |              |
|-----|------------------------------------|----|--------------|
| CDA | Glutathione metabolism             | OV | 0.059392601  |
| CDA | Glycerolipid metabolism            | OV | -0.048975787 |
| CDA | Glycerophospholipid metabolism     | OV | -0.10718367  |
| CDA | Glycine, serine and threonine      | OV | -0.014797011 |
| CDA | Glycolysis / gluconeogenesis       | OV | 0.056508334  |
| CDA | Glycosaminoglycan biosynthesis     | OV | 0.341583518  |
| CDA | Glycosaminoglycan biosynthesis     | OV | 0.179607675  |
| CDA | Glycosaminoglycan biosynthesis     | OV | 0.065041779  |
| CDA | Glycosaminoglycan degradation      | OV | 0.073530181  |
| CDA | Glycosphingolipid biosynthesis     | OV | 0.11909697   |
| CDA | Glycosphingolipid biosynthesis     | OV | 0.230598044  |
| CDA | Glycosphingolipid biosynthesis     | OV | 0.123734973  |
| CDA | Glycosylphosphatidylinositol       | OV | -0.104051215 |
| CDA | Glyoxylate and dicarboxylate       | OV | -0.121090171 |
| CDA | Granulocyte                        | OV | 0.079180649  |
| CDA | Hedgehog signaling                 | OV | 0.2498658    |
| CDA | Histidine metabolism               | OV | 0.152905984  |
| CDA | Hypoxia                            | OV | 0.233480589  |
| CDA | Il-17alpha T cell                  | OV | 0.008254278  |
| CDA | Il2_stat5_signaling                | OV | 0.196203664  |
| CDA | Il6_jak_stat3_signaling            | OV | 0.110486292  |
| CDA | Immune checkpoints                 | OV | 0.015065271  |
| CDA | Immune inhibition                  | OV | 0.073203846  |
| CDA | Inositol phosphate metabolism      | OV | -0.114811585 |
| CDA | Interleukin_6 signaling            | OV | -0.158749588 |
| CDA | Jaeger metastasis up               | OV | 0.064766219  |
| CDA | Jain_nfkb_signaling                | OV | -0.247144132 |
| CDA | Kras signaling up                  | OV | 0.254528838  |
| CDA | Linoleic acid metabolism           | OV | 0.018836679  |
| CDA | Lipoic acid metabolism             | OV | -0.101599255 |
| CDA | Lysine degradation                 | OV | -0.235194695 |
| CDA | Lysosome                           | OV | 0.071827722  |
| CDA | M1 macrophage                      | OV | 0.054122336  |
| CDA | M2 macrophage                      | OV | 0.143448606  |
| CDA | Mannose type o-glycan biosynthesis | OV | 0.04748343   |
| CDA | Mapk signaling pathway             | OV | 0.255646215  |
| CDA | Mapk3_erk1_activation              | OV | -0.131339406 |
| CDA | Marginal zone B cell               | OV | -0.016421974 |
| CDA | Memory B cell                      | OV | -0.020100089 |
| CDA | Mesenchymal cell                   | OV | 0.310396004  |
| CDA | Mesenchymal stem cell              | OV | 0.15580228   |
| CDA | Metabolism of xenobiotics          | OV | 0.148949286  |
| CDA | Migrating cancer stem cell         | OV | -0.060491907 |

|     |                                                   |    |              |
|-----|---------------------------------------------------|----|--------------|
| CDA | Mitotic_spindle                                   | OV | -0.165395705 |
| CDA | Monocyte                                          | OV | 0.165311903  |
| CDA | Mtor_signaling_pathway                            | OV | -0.180042592 |
| CDA | Mtorc1_signaling                                  | OV | 0.0521893    |
| CDA | Mucin type o-glycan biosynthesis                  | OV | 0.162451321  |
| CDA | Myc_targets_v1                                    | OV | -0.045868681 |
| CDA | Myeloid cell                                      | OV | 0.070723329  |
| CDA | N-glycan biosynthesis                             | OV | 0.024048138  |
| CDA | Naive b cell                                      | OV | -0.13317974  |
| CDA | Naive cd4+ t cell                                 | OV | 0.101576054  |
| CDA | Naive cd8+ t cell                                 | OV | 0.131432528  |
| CDA | Natural killer cell                               | OV | 0.053870721  |
| CDA | Natural killer t (nkt) cell                       | OV | -0.011610545 |
| CDA | Natural regulatory t (treg) cell                  | OV | 0.050610632  |
| CDA | Neomycin, kanamycin and spectinomycin             | OV | 0.121035107  |
| CDA | Neutrophil                                        | OV | 0.171748426  |
| CDA | Nicotinate and nicotinamide metabolism            | OV | 0.011404267  |
| CDA | Nitrogen metabolism                               | OV | 0.120463944  |
| CDA | Nod_like_receptor_signaling                       | OV | 0.03750654   |
| CDA | Notch_signaling                                   | OV | 0.179001983  |
| CDA | One carbon pool by folate                         | OV | -0.098937852 |
| CDA | Other glycan degradation                          | OV | -0.078814716 |
| CDA | Other types of o-glycan biosynthesis              | OV | -0.087868342 |
| CDA | Oxidative phosphorylation                         | OV | 0.018728775  |
| CDA | P53_pathway                                       | OV | 0.180496751  |
| CDA | P53_signaling_pathway                             | OV | -0.018653584 |
| CDA | Pantothenate and coenzyme a biosynthesis          | OV | 0.06627101   |
| CDA | Pentose and glucuronate interconversions          | OV | 0.075979148  |
| CDA | Pentose phosphate pathway                         | OV | 0.135908685  |
| CDA | Pericyte                                          | OV | 0.234753452  |
| CDA | Phenylalanine metabolism                          | OV | 0.083379407  |
| CDA | Phenylalanine, tyrosine and tryptophan metabolism | OV | -0.090567271 |
| CDA | Phosphonate and phosphite metabolism              | OV | -0.127723492 |
| CDA | Pi3k_akt_activation                               | OV | 0.020420786  |
| CDA | Pi3k_akt_mtor_signaling                           | OV | 0.043663401  |
| CDA | Porphyrin and chlorophyll metabolism              | OV | -0.025290304 |
| CDA | Primary bile acid biosynthesis                    | OV | 0.178316684  |
| CDA | Propanoate metabolism                             | OV | -0.128896512 |
| CDA | Purine metabolism                                 | OV | 0.002596383  |
| CDA | Pyrimidine metabolism                             | OV | -0.057311542 |
| CDA | Pyruvate metabolism                               | OV | -0.122292706 |
| CDA | Regulation_of_autophagy                           | OV | -0.052256911 |
| CDA | Retinol metabolism                                | OV | 0.171328219  |

|      |                                    |    |              |
|------|------------------------------------|----|--------------|
| CDA  | Riboflavin metabolism              | OV | 0.135243865  |
| CDA  | Schmahl_pdgf_signaling             | OV | 0.033263167  |
| CDA  | Selenocompound metabolism          | OV | -0.024949796 |
| CDA  | Signaling_by_hippo                 | OV | 0.064105252  |
| CDA  | Sphingolipid metabolism            | OV | -0.049896805 |
| CDA  | Starch and sucrose metabolism      | OV | 0.001260664  |
| CDA  | Steroid biosynthesis               | OV | -0.070971523 |
| CDA  | Steroid hormone biosynthesis       | OV | 0.058672391  |
| CDA  | Sulfur metabolism                  | OV | 0.167347976  |
| CDA  | Synthesis and degradation          | OV | -0.152524403 |
| CDA  | T helper cell                      | OV | 0.071675826  |
| CDA  | T helper1 (th1) cell               | OV | 0.038041764  |
| CDA  | T helper17 (th17) cell             | OV | 0.060429     |
| CDA  | T helper2 (th2) cell               | OV | 0.090424615  |
| CDA  | T helper9 (th9) cell               | OV | 0.044423706  |
| CDA  | Taurine and hypotaurine metabolism | OV | 0.023903961  |
| CDA  | Terpenoid backbone biosynthesis    | OV | -0.077777384 |
| CDA  | Tgf_beta_signaling_pathway         | OV | 0.150348728  |
| CDA  | Thiamine metabolism                | OV | 0.054611417  |
| CDA  | Tnfa_signaling_via_nfkB            | OV | 0.105589726  |
| CDA  | Tryptophan metabolism              | OV | -0.044954059 |
| CDA  | Tumor endothelial cell             | OV | 0.189118354  |
| CDA  | Tyrosine metabolism                | OV | 0.171793469  |
| CDA  | Ubiquinone and other terpenoids    | OV | -0.009479656 |
| CDA  | Valine, leucine and isoleucine     | OV | 0.218034143  |
| CDA  | Valine, leucine and isoleucine     | OV | -0.090022703 |
| CDA  | Vascular endothelial cell          | OV | 0.131903194  |
| CDA  | Vascular smooth muscle cell        | OV | 0.16275905   |
| CDA  | Vegf_signaling_pathway             | OV | 0.140500841  |
| CDA  | Vitamin b6 metabolism              | OV | -0.120210239 |
| CDA  | Willert_wnt_signaling              | OV | 0.292298304  |
| CDA  | Wnt_beta_catenin_signaling         | OV | 0.167818388  |
| UCK1 | Abnormal plasma cell               | OV | 0.008664648  |
| UCK1 | Activated b cell                   | OV | -0.022030586 |
| UCK1 | Activated cd4+ t cell              | OV | -0.032874429 |
| UCK1 | Activated t cell                   | OV | -0.017684296 |
| UCK1 | Alanine, aspartate and glutamate   | OV | -0.080466655 |
| UCK1 | Alcaline apoptosis                 | OV | -0.042522995 |
| UCK1 | Alpha-linolenic acid metabolism    | OV | 0.025368307  |
| UCK1 | Amino sugar and nucleotide         | OV | 0.128642403  |
| UCK1 | Ampk_pathway                       | OV | 0.126203748  |
| UCK1 | Angiogenesis                       | OV | 0.008602527  |
| UCK1 | Arachidonic acid metabolism        | OV | 0.150587925  |



|      |                                         |    |              |
|------|-----------------------------------------|----|--------------|
| UCK1 | Arginine and proline metabolism         | OV | 0.077900462  |
| UCK1 | Arginine biosynthesis                   | OV | 0.050972043  |
| UCK1 | Ascorbate and aldarate metabolism       | OV | 0.044121798  |
| UCK1 | Atypical memory B cell                  | OV | 0.084668022  |
| UCK1 | Axl+siglec6+ dendritic cell             | OV | 0.019817724  |
| UCK1 | B cell                                  | OV | -0.090932751 |
| UCK1 | B1 cell                                 | OV | -0.011901482 |
| UCK1 | Basal cell                              | OV | -0.027394435 |
| UCK1 | Beta-alanine metabolism                 | OV | 0.046532521  |
| UCK1 | Biosynthesis of unsaturated fatty acids | OV | 0.260120996  |
| UCK1 | Biotin metabolism                       | OV | 0.004724412  |
| UCK1 | Butanoate metabolism                    | OV | 0.14547429   |
| UCK1 | Caffeine metabolism                     | OV | 0.045449494  |
| UCK1 | Cancer stem cell                        | OV | -0.113064468 |
| UCK1 | Cancer stem-like cell                   | OV | -0.004107125 |
| UCK1 | Cd4+ cytotoxic T cell                   | OV | -0.02620358  |
| UCK1 | Cd4+ memory T cell                      | OV | -0.046511913 |
| UCK1 | Cd4+ regulatory T cell                  | OV | -0.020925602 |
| UCK1 | Cd4+ T helper cell                      | OV | -0.029494622 |
| UCK1 | Cd4+cd25+ regulatory T cell             | OV | -0.029263839 |
| UCK1 | Cd8+ cytotoxic T cell                   | OV | -0.02765963  |
| UCK1 | Cd8+ regulatory T cell                  | OV | -0.000559534 |
| UCK1 | Cell cycle                              | OV | 0.127012799  |
| UCK1 | Chandran_metastasis_top50               | OV | -0.187314063 |
| UCK1 | Citrate cycle (TCA cycle)               | OV | 0.117536475  |
| UCK1 | Cysteine and methionine metabolism      | OV | 0.026007906  |
| UCK1 | Cytokine induced killer cell            | OV | -0.06477035  |
| UCK1 | D-arginine and D-ornithine              | OV | 0.041952914  |
| UCK1 | D-glutamine and D-glutamate             | OV | -0.033914699 |
| UCK1 | Dendritic cell                          | OV | -0.046787687 |
| UCK1 | DNA repair                              | OV | 0.253254237  |
| UCK1 | DNA replication                         | OV | 0.261742883  |
| UCK1 | Double-negative memory T cell           | OV | 0.003821759  |
| UCK1 | Drug metabolism - cytochrome P450       | OV | 0.000362958  |
| UCK1 | Drug metabolism - other                 | OV | 0.155631474  |
| UCK1 | E2f targets                             | OV | 0.133351254  |
| UCK1 | ECM_receptor_interaction                | OV | -0.039929968 |
| UCK1 | Effector CD4+ memory T cell             | OV | -0.054190304 |
| UCK1 | Effector CD8+ memory T cell             | OV | -0.059423243 |
| UCK1 | Effector memory T cell                  | OV | -0.038204951 |
| UCK1 | Effector regulatory T (Treg) cell       | OV | -0.043449215 |
| UCK1 | Elvidge_hif1a_targets_up                | OV | 0.012629968  |
| UCK1 | Endothelial cell                        | OV | -0.019707748 |

|      |                                          |    |              |
|------|------------------------------------------|----|--------------|
| UCK1 | Eosinophil                               | OV | -0.031718933 |
| UCK1 | Ether lipid metabolism                   | OV | -0.046684476 |
| UCK1 | Exhausted cd4+ t cell                    | OV | 0.016240025  |
| UCK1 | Exhausted cd8+ t cell                    | OV | -0.055033423 |
| UCK1 | Exhausted t cell                         | OV | -0.007066945 |
| UCK1 | Fat cell (adipocyte)                     | OV | 0.114465553  |
| UCK1 | Fatty acid biosynthesis                  | OV | 0.045021597  |
| UCK1 | Fatty acid degradation                   | OV | 0.175256358  |
| UCK1 | Fatty acid elongation                    | OV | 0.163085266  |
| UCK1 | Fibroblast                               | OV | -0.031308244 |
| UCK1 | Folate biosynthesis                      | OV | 0.213008045  |
| UCK1 | Follicular b cell                        | OV | -0.101685177 |
| UCK1 | Follicular dendritic cell                | OV | -0.038169093 |
| UCK1 | Follicular helper (tfh) t cell           | OV | -0.050431932 |
| UCK1 | Follicular t cell                        | OV | 0.033198584  |
| UCK1 | Foxp3+il-17+ t cell                      | OV | 0.031301746  |
| UCK1 | Fructose and mannose metabolism          | OV | 0.058190744  |
| UCK1 | G2m_checkpoint                           | OV | 0.094398684  |
| UCK1 | Galactose metabolism                     | OV | 0.124593365  |
| UCK1 | Galie_tumor_stemness_gene                | OV | 0.016972129  |
| UCK1 | Glutathione metabolism                   | OV | 0.162173219  |
| UCK1 | Glycerolipid metabolism                  | OV | 0.073026097  |
| UCK1 | Glycerophospholipid metabolism           | OV | -0.143815158 |
| UCK1 | Glycine, serine and threonine metabolism | OV | 0.146735774  |
| UCK1 | Glycolysis / gluconeogenesis             | OV | 0.154839261  |
| UCK1 | Glycosaminoglycan biosynthesis           | OV | 0.021234612  |
| UCK1 | Glycosaminoglycan biosynthesis           | OV | 0.013459522  |
| UCK1 | Glycosaminoglycan biosynthesis           | OV | -0.143078186 |
| UCK1 | Glycosaminoglycan degradation            | OV | 0.068407011  |
| UCK1 | Glycosphingolipid biosynthesis           | OV | 0.127011226  |
| UCK1 | Glycosphingolipid biosynthesis           | OV | 0.137606795  |
| UCK1 | Glycosphingolipid biosynthesis           | OV | 0.062360521  |
| UCK1 | Glycosylphosphatidylinositol             | OV | 0.1022826    |
| UCK1 | Glyoxylate and dicarboxylate metabolism  | OV | 0.078735637  |
| UCK1 | Granulocyte                              | OV | -0.030763085 |
| UCK1 | Hedgehog_signaling                       | OV | -0.151186614 |
| UCK1 | Histidine metabolism                     | OV | -0.023891945 |
| UCK1 | Hypoxia                                  | OV | -0.024251189 |
| UCK1 | Il-17alpha t cell                        | OV | -0.019469517 |
| UCK1 | Il2_stat5_signaling                      | OV | -0.055537002 |
| UCK1 | Il6_jak_stat3_signaling                  | OV | -0.073134159 |
| UCK1 | Immune_checkpoints_tumor                 | OV | -0.074240807 |
| UCK1 | Immune_inhibition_cytokines              | OV | -0.015700334 |

|      |                             |    |              |
|------|-----------------------------|----|--------------|
| UCK1 | Inositol phosphate metabo   | OV | -0.08418647  |
| UCK1 | Interleukin_6_signaling     | OV | -0.238306159 |
| UCK1 | Jaeger_metastasis_up        | OV | 0.118923241  |
| UCK1 | Jain_nfkb_signaling         | OV | -0.15187615  |
| UCK1 | Kras_signaling_up           | OV | -0.069939854 |
| UCK1 | Linoleic acid metabolism    | OV | -0.048625046 |
| UCK1 | Lipoic acid metabolism      | OV | 0.079958738  |
| UCK1 | Lysine degradatation        | OV | -0.028162654 |
| UCK1 | Lysosome                    | OV | -0.002140879 |
| UCK1 | M1 macrophage               | OV | -0.051167719 |
| UCK1 | M2 macrophage               | OV | -0.035289554 |
| UCK1 | Mannose type o-glycan bi    | OV | 0.163644306  |
| UCK1 | Mapk_signaling_pathway      | OV | -0.066848173 |
| UCK1 | Mapk3_erk1_activation       | OV | -0.173098856 |
| UCK1 | Marginal zone b cell        | OV | 0.0072753    |
| UCK1 | Memory b cell               | OV | -0.053902749 |
| UCK1 | Mesenchymal cell            | OV | 0.01976319   |
| UCK1 | Mesenchymal stem cell       | OV | -0.075986885 |
| UCK1 | Metabolism of xenobiotic    | OV | 0.080251884  |
| UCK1 | Migrating cancer stem cel   | OV | -0.093779498 |
| UCK1 | Mitotic_spindle             | OV | -0.060306141 |
| UCK1 | Monocyte                    | OV | -0.012694473 |
| UCK1 | Mtor_signaling_pathway      | OV | 0.075695308  |
| UCK1 | Mtorc1_signaling            | OV | 0.042279366  |
| UCK1 | Mucin type o-glycan biosy   | OV | -0.106869011 |
| UCK1 | Myc_targets_v1              | OV | 0.095429528  |
| UCK1 | Myeloid cell                | OV | -0.037611381 |
| UCK1 | N-glycan biosynthesis       | OV | 0.224323755  |
| UCK1 | Naive b cell                | OV | -0.033780155 |
| UCK1 | Naive cd4+ t cell           | OV | -0.134351297 |
| UCK1 | Naive cd8+ t cell           | OV | -0.240005837 |
| UCK1 | Natural killer cell         | OV | -0.03730029  |
| UCK1 | Natural killer t (nkt) cell | OV | 0.01192803   |
| UCK1 | Natural regulatory t (treg) | OV | -0.082328948 |
| UCK1 | Neomycin, kanamycin and     | OV | -0.018282623 |
| UCK1 | Neutrophil                  | OV | -0.023252372 |
| UCK1 | Nicotinate and nicotinami   | OV | 0.084004397  |
| UCK1 | Nitrogen metabolism         | OV | -0.009864711 |
| UCK1 | Nod_like_receptor_signal    | OV | -0.092239233 |
| UCK1 | Notch_signaling             | OV | -0.158919446 |
| UCK1 | One carbon pool by folate   | OV | 0.05995994   |
| UCK1 | Other glycan degradatation  | OV | 0.031655716  |
| UCK1 | Other types of o-glycan b   | OV | 0.081811187  |

|      |                                                   |    |              |
|------|---------------------------------------------------|----|--------------|
| UCK1 | Oxidative phosphorylation                         | OV | 0.155366875  |
| UCK1 | P53_pathway                                       | OV | 0.087581535  |
| UCK1 | P53_signaling_pathway                             | OV | 0.013541635  |
| UCK1 | Pantothenate and coa biosynthesis                 | OV | 0.049754512  |
| UCK1 | Pentose and glucuronate interconversions          | OV | 0.04510011   |
| UCK1 | Pentose phosphate pathway                         | OV | 0.106552322  |
| UCK1 | Pericyte                                          | OV | -0.01877257  |
| UCK1 | Phenylalanine metabolism                          | OV | 0.059794647  |
| UCK1 | Phenylalanine, tyrosine and tryptophan metabolism | OV | 0.001336145  |
| UCK1 | Phosphonate and phosphite metabolism              | OV | 0.071899576  |
| UCK1 | Pi3k_akt_activation                               | OV | -0.10683737  |
| UCK1 | Pi3k_akt_mtor_signaling                           | OV | 0.060212161  |
| UCK1 | Porphyrin and chlorophyll metabolism              | OV | 0.075267527  |
| UCK1 | Primary bile acid biosynthesis                    | OV | 0.104894698  |
| UCK1 | Propanoate metabolism                             | OV | -0.032770426 |
| UCK1 | Purine metabolism                                 | OV | 0.141440258  |
| UCK1 | Pyrimidine metabolism                             | OV | 0.230186105  |
| UCK1 | Pyruvate metabolism                               | OV | 0.191575911  |
| UCK1 | Regulation_of_autophagy                           | OV | 0.061195155  |
| UCK1 | Retinol metabolism                                | OV | 0.203708031  |
| UCK1 | Riboflavin metabolism                             | OV | 0.117708115  |
| UCK1 | Schmahl_pdgf_signaling                            | OV | -0.048777497 |
| UCK1 | Selenocompound metabolism                         | OV | -0.216966754 |
| UCK1 | Signaling_by_hippo                                | OV | -0.118361108 |
| UCK1 | Sphingolipid metabolism                           | OV | 0.070747297  |
| UCK1 | Starch and sucrose metabolism                     | OV | -0.067016431 |
| UCK1 | Steroid biosynthesis                              | OV | 0.252027796  |
| UCK1 | Steroid hormone biosynthesis                      | OV | 0.023768576  |
| UCK1 | Sulfur metabolism                                 | OV | -0.072093574 |
| UCK1 | Synthesis and degradation of ribonucleotides      | OV | 0.220249663  |
| UCK1 | T helper cell                                     | OV | -0.06466113  |
| UCK1 | T helper1 (th1) cell                              | OV | -0.061562976 |
| UCK1 | T helper17 (th17) cell                            | OV | -0.052297691 |
| UCK1 | T helper2 (th2) cell                              | OV | -0.035297204 |
| UCK1 | T helper9 (th9) cell                              | OV | -0.043420576 |
| UCK1 | Taurine and hypotaurine metabolism                | OV | 0.050259033  |
| UCK1 | Terpenoid backbone biosynthesis                   | OV | 0.044973069  |
| UCK1 | Tgf_beta_signaling_pathway                        | OV | -0.137900744 |
| UCK1 | Thiamine metabolism                               | OV | 0.157180734  |
| UCK1 | Tnfa_signaling_via_nfkB                           | OV | -0.04549528  |
| UCK1 | Tryptophan metabolism                             | OV | 0.135935487  |
| UCK1 | Tumor endothelial cell                            | OV | -0.014391511 |
| UCK1 | Tyrosine metabolism                               | OV | 0.161138085  |

|      |                            |    |              |
|------|----------------------------|----|--------------|
| UCK1 | Ubiquinone and other ter   | OV | 0.002954214  |
| UCK1 | Valine, leucine and isoleu | OV | 0.030457564  |
| UCK1 | Valine, leucine and isoleu | OV | 0.051065448  |
| UCK1 | Vascular endothelial cell  | OV | 0.01263601   |
| UCK1 | Vascular smooth muscle c   | OV | 0.013649319  |
| UCK1 | Vegf_signaling_pathway     | OV | 0.051932151  |
| UCK1 | Vitamin b6 metabolism      | OV | -0.077707461 |
| UCK1 | Willert_wnt_signaling      | OV | -0.045751225 |
| UCK1 | Wnt_beta_catenin_signali   | OV | -0.06119248  |
| UCK2 | Abnormal plasma cell       | OV | -0.079319994 |
| UCK2 | Activated b cell           | OV | 0.01324205   |
| UCK2 | Activated cd4+ t cell      | OV | -0.043609076 |
| UCK2 | Activated t cell           | OV | -0.005728281 |
| UCK2 | Alanine, aspartate and glu | OV | 0.275641662  |
| UCK2 | Alcala_apoptosis           | OV | 0.284067531  |
| UCK2 | Alpha-linolenic acid meta  | OV | 0.081085792  |
| UCK2 | Amino sugar and nucleoti   | OV | 0.289558344  |
| UCK2 | Ampk_pathway               | OV | 0.06891779   |
| UCK2 | Angiogenesis               | OV | -0.111833909 |
| UCK2 | Arachidonic acid metaboli  | OV | 0.014020093  |
| UCK2 | Arginine and proline metæ  | OV | 0.299120371  |
| UCK2 | Arginine biosynthesis      | OV | 0.147420219  |
| UCK2 | Ascorbate and aldarate mε  | OV | 0.280479943  |
| UCK2 | Atypical memory b cell     | OV | 0.031160852  |
| UCK2 | Axl+siglec6+ dendritic ce  | OV | -0.229645962 |
| UCK2 | B cell                     | OV | -0.018445646 |
| UCK2 | B1 cell                    | OV | -0.034286682 |
| UCK2 | Basal cell                 | OV | -0.043448052 |
| UCK2 | Beta-alanine metabolism    | OV | 0.169203693  |
| UCK2 | Biosynthesis of unsaturate | OV | 0.264524011  |
| UCK2 | Biotin metabolism          | OV | 0.110964734  |
| UCK2 | Butanoate metabolism       | OV | 0.236904418  |
| UCK2 | Caffeine metabolism        | OV | -0.005635151 |
| UCK2 | Cancer stem cell           | OV | -0.173364797 |
| UCK2 | Cancer stem-like cell      | OV | 0.105089884  |
| UCK2 | Cd4+ cytotoxic t cell      | OV | -0.166699787 |
| UCK2 | Cd4+ memory t cell         | OV | -0.021043229 |
| UCK2 | Cd4+ regulatory t cell     | OV | -0.124812149 |
| UCK2 | Cd4+ t helper cell         | OV | -0.06963232  |
| UCK2 | Cd4+cd25+ regulatory t c   | OV | -0.069112229 |
| UCK2 | Cd8+ cytotoxic t cell      | OV | 0.022214607  |
| UCK2 | Cd8+ regulatory t cell     | OV | -0.005286023 |
| UCK2 | Cell_cycle                 | OV | 0.264807186  |

|      |                                           |              |
|------|-------------------------------------------|--------------|
| UCK2 | Chandran_metastasis_top <sup>2</sup> OV   | 0.004580771  |
| UCK2 | Citrate cycle (tca cycle) OV              | 0.205833629  |
| UCK2 | Cysteine and methionine r OV              | 0.343366589  |
| UCK2 | Cytokine induced killer c $\alpha$ OV     | -0.107518555 |
| UCK2 | D-arginine and d-ornithin OV              | 0.102566419  |
| UCK2 | D-glutamine and d-glutan OV               | 0.024141446  |
| UCK2 | Dendritic cell OV                         | -0.081669367 |
| UCK2 | Dna_repair OV                             | 0.40919119   |
| UCK2 | Dna_replication OV                        | 0.398503887  |
| UCK2 | Double-negative memory OV                 | 0.072339217  |
| UCK2 | Drug metabolism - cytoch OV               | 0.235239605  |
| UCK2 | Drug metabolism - other $\epsilon$ OV     | 0.467756323  |
| UCK2 | E2f_targets OV                            | 0.360007615  |
| UCK2 | Ecm_receptor_interaction OV               | -0.250151412 |
| UCK2 | Effector cd4+ memory t ( OV               | -0.079343375 |
| UCK2 | Effector cd8+ memory t ( OV               | -0.191639982 |
| UCK2 | Effector memory t cell OV                 | -0.038076555 |
| UCK2 | Effector regulatory t (treg OV            | -0.13072474  |
| UCK2 | Elvidge_hif1a_targets_up OV               | 0.272108318  |
| UCK2 | Endothelial cell OV                       | -0.059675587 |
| UCK2 | Eosinophil OV                             | -0.055513862 |
| UCK2 | Ether lipid metabolism OV                 | 0.038717559  |
| UCK2 | Exhausted cd4+ t cell OV                  | -0.032485794 |
| UCK2 | Exhausted cd8+ t cell OV                  | -0.074838359 |
| UCK2 | Exhausted t cell OV                       | -0.014944306 |
| UCK2 | Fat cell (adipocyte) OV                   | -0.041503606 |
| UCK2 | Fatty acid biosynthesis OV                | 0.114738481  |
| UCK2 | Fatty acid degradation OV                 | 0.237697396  |
| UCK2 | Fatty acid elongation OV                  | 0.372951954  |
| UCK2 | Fibroblast OV                             | -0.150224335 |
| UCK2 | Folate biosynthesis OV                    | 0.222143641  |
| UCK2 | Follicular b cell OV                      | -0.099881969 |
| UCK2 | Follicular dendritic cell OV              | -0.128282216 |
| UCK2 | Follicular helper (tfh) t c $\epsilon$ OV | -0.053527432 |
| UCK2 | Follicular t cell OV                      | -0.035285114 |
| UCK2 | Foxp3+il-17+ t cell OV                    | -0.001581886 |
| UCK2 | Fructose and mannose me OV                | 0.262343301  |
| UCK2 | G2m_checkpoint OV                         | 0.2500774    |
| UCK2 | Galactose metabolism OV                   | 0.21719633   |
| UCK2 | Galie_tumor_stemness_ge OV                | -0.210976592 |
| UCK2 | Glutathione metabolism OV                 | 0.361155549  |
| UCK2 | Glycerolipid metabolism OV                | 0.03636603   |
| UCK2 | Glycerophospholipid met $\epsilon$ OV     | -0.027806719 |

|      |                            |    |              |
|------|----------------------------|----|--------------|
| UCK2 | Glycine, serine and threor | OV | 0.251539433  |
| UCK2 | Glycolysis / gluconeogene  | OV | 0.296328485  |
| UCK2 | Glycosaminoglycan biosy    | OV | -0.058999552 |
| UCK2 | Glycosaminoglycan biosy    | OV | -0.141558833 |
| UCK2 | Glycosaminoglycan biosy    | OV | 0.043411846  |
| UCK2 | Glycosaminoglycan degra    | OV | 0.084722684  |
| UCK2 | Glycosphingolipid biosyn   | OV | 0.04617002   |
| UCK2 | Glycosphingolipid biosyn   | OV | -0.011597056 |
| UCK2 | Glycosphingolipid biosyn   | OV | 0.05920742   |
| UCK2 | Glycosylphosphatidylinos   | OV | 0.263955567  |
| UCK2 | Glyoxylate and dicarboxy   | OV | 0.336180924  |
| UCK2 | Granulocyte                | OV | -0.045602382 |
| UCK2 | Hedgehog_signaling         | OV | -0.247827196 |
| UCK2 | Histidine metabolism       | OV | 0.007120522  |
| UCK2 | Hypoxia                    | OV | -0.045432205 |
| UCK2 | Il-17alpha t cell          | OV | -0.001084854 |
| UCK2 | Il2_stat5_signaling        | OV | -0.045544449 |
| UCK2 | Il6_jak_stat3_signaling    | OV | -0.04327853  |
| UCK2 | Immune_checkpoints_tun     | OV | -0.046313594 |
| UCK2 | Immune_inhibition_cytok    | OV | 0.047793816  |
| UCK2 | Inositol phosphate metabo  | OV | -0.234839524 |
| UCK2 | Interleukin_6_signaling    | OV | -0.142319916 |
| UCK2 | Jaeger_metastasis_up       | OV | 0.115093727  |
| UCK2 | Jain_nfkb_signaling        | OV | 0.343126012  |
| UCK2 | Kras_signaling_up          | OV | -0.157171278 |
| UCK2 | Linoleic acid metabolism   | OV | 0.052587353  |
| UCK2 | Lipoic acid metabolism     | OV | 0.099948267  |
| UCK2 | Lysine degradation         | OV | -0.006296846 |
| UCK2 | Lysosome                   | OV | 0.045971469  |
| UCK2 | M1 macrophage              | OV | -0.037185992 |
| UCK2 | M2 macrophage              | OV | -0.069693984 |
| UCK2 | Mannose type o-glycan bi   | OV | 0.087653221  |
| UCK2 | Mapk_signaling_pathway     | OV | -0.236609128 |
| UCK2 | Mapk3_erk1_activation      | OV | 0.050003549  |
| UCK2 | Marginal zone b cell       | OV | 0.008303678  |
| UCK2 | Memory b cell              | OV | -0.077887486 |
| UCK2 | Mesenchymal cell           | OV | -0.014085789 |
| UCK2 | Mesenchymal stem cell      | OV | -0.16055054  |
| UCK2 | Metabolism of xenobiotic   | OV | 0.280617244  |
| UCK2 | Migrating cancer stem cel  | OV | -0.062728619 |
| UCK2 | Mitotic_spindle            | OV | -0.129446032 |
| UCK2 | Monocyte                   | OV | -0.057394916 |
| UCK2 | Mtor_signaling_pathway     | OV | -0.077694227 |

|      |                                                   |    |              |
|------|---------------------------------------------------|----|--------------|
| UCK2 | Mtorc1_signaling                                  | OV | 0.374599542  |
| UCK2 | Mucin type o-glycan biosynthesis                  | OV | -0.176091843 |
| UCK2 | Myc_targets_v1                                    | OV | 0.465121161  |
| UCK2 | Myeloid cell                                      | OV | -0.089250555 |
| UCK2 | N-glycan biosynthesis                             | OV | 0.183082936  |
| UCK2 | Naive b cell                                      | OV | 0.115761092  |
| UCK2 | Naive cd4+ t cell                                 | OV | -0.238162329 |
| UCK2 | Naive cd8+ t cell                                 | OV | -0.251110204 |
| UCK2 | Natural killer cell                               | OV | -0.03510552  |
| UCK2 | Natural killer t (nkt) cell                       | OV | 0.238708895  |
| UCK2 | Natural regulatory t (treg) cell                  | OV | -0.210076047 |
| UCK2 | Neomycin, kanamycin and spectinomycin             | OV | -0.005993546 |
| UCK2 | Neutrophil                                        | OV | -0.008538149 |
| UCK2 | Nicotinate and nicotinamide metabolism            | OV | 0.175164239  |
| UCK2 | Nitrogen metabolism                               | OV | 0.00892677   |
| UCK2 | Nod_like_receptor_signaling                       | OV | -0.028083003 |
| UCK2 | Notch_signaling                                   | OV | -0.067018276 |
| UCK2 | One carbon pool by folate                         | OV | 0.277243965  |
| UCK2 | Other glycan degradation                          | OV | 0.056666868  |
| UCK2 | Other types of o-glycan biosynthesis              | OV | -0.049919339 |
| UCK2 | Oxidative phosphorylation                         | OV | 0.296616166  |
| UCK2 | P53_pathway                                       | OV | 0.029373163  |
| UCK2 | P53_signaling_pathway                             | OV | 0.073629071  |
| UCK2 | Pantothenate and coenzyme a biosynthesis          | OV | 0.127250293  |
| UCK2 | Pentose and glucuronate interconversions          | OV | 0.402770063  |
| UCK2 | Pentose phosphate pathway                         | OV | 0.307626742  |
| UCK2 | Pericyte                                          | OV | -0.136212422 |
| UCK2 | Phenylalanine metabolism                          | OV | 0.126069842  |
| UCK2 | Phenylalanine, tyrosine and tryptophan metabolism | OV | 0.132023355  |
| UCK2 | Phosphonate and phosphite metabolism              | OV | 0.209391306  |
| UCK2 | Pi3k_akt_activation                               | OV | 0.025022021  |
| UCK2 | Pi3k_akt_mtor_signaling                           | OV | 0.173677077  |
| UCK2 | Porphyrim and chlorophyll biosynthesis            | OV | 0.336812678  |
| UCK2 | Primary bile acid biosynthesis                    | OV | 0.160494341  |
| UCK2 | Propanoate metabolism                             | OV | 0.140175632  |
| UCK2 | Purine metabolism                                 | OV | 0.564967066  |
| UCK2 | Pyrimidine metabolism                             | OV | 0.546142308  |
| UCK2 | Pyruvate metabolism                               | OV | 0.305137723  |
| UCK2 | Regulation_of_autophagy                           | OV | 0.017731413  |
| UCK2 | Retinol metabolism                                | OV | 0.156907778  |
| UCK2 | Riboflavin metabolism                             | OV | 0.301097811  |
| UCK2 | Schmahl_pdgf_signaling                            | OV | -0.253140733 |
| UCK2 | Selenocompound metabolism                         | OV | 0.338336643  |



|       |                            |    |              |
|-------|----------------------------|----|--------------|
| UCK2  | Signaling_by_hippo         | OV | -0.192700795 |
| UCK2  | Sphingolipid metabolism    | OV | -0.130903639 |
| UCK2  | Starch and sucrose metabo  | OV | -0.00714994  |
| UCK2  | Steroid biosynthesis       | OV | 0.269102004  |
| UCK2  | Steroid hormone biosynth   | OV | 0.189596519  |
| UCK2  | Sulfur metabolism          | OV | 0.186295795  |
| UCK2  | Synthesis and degradation  | OV | 0.23684183   |
| UCK2  | T helper cell              | OV | -0.05327387  |
| UCK2  | T helper1 (th1) cell       | OV | -0.026527722 |
| UCK2  | T helper17 (th17) cell     | OV | -0.088122985 |
| UCK2  | T helper2 (th2) cell       | OV | -0.070121513 |
| UCK2  | T helper9 (th9) cell       | OV | -0.062041801 |
| UCK2  | Taurine and hypotaurine r  | OV | -0.048485428 |
| UCK2  | Terpenoid backbone biosy   | OV | 0.291486655  |
| UCK2  | Tgf_beta_signaling_pathw   | OV | -0.126665506 |
| UCK2  | Thiamine metabolism        | OV | 0.137022582  |
| UCK2  | Tnfa_signaling_via_nfk     | OV | -0.056723618 |
| UCK2  | Tryptophan metabolism      | OV | 0.209072044  |
| UCK2  | Tumor endothelial cell     | OV | 0.034371577  |
| UCK2  | Tyrosine metabolism        | OV | 0.137734266  |
| UCK2  | Ubiquinone and other ter   | OV | 0.279664858  |
| UCK2  | Valine, leucine and isoleu | OV | 0.076660088  |
| UCK2  | Valine, leucine and isoleu | OV | 0.221088312  |
| UCK2  | Vascular endothelial cell  | OV | -0.074929475 |
| UCK2  | Vascular smooth muscle c   | OV | -0.140482443 |
| UCK2  | Vegf_signaling_pathway     | OV | -0.116953288 |
| UCK2  | Vitamin b6 metabolism      | OV | 0.095148959  |
| UCK2  | Willert_wnt_signaling      | OV | 0.185724345  |
| UCK2  | Wnt_beta_catenin_signali   | OV | -0.110184993 |
| UCKL1 | Abnormal plasma cell       | OV | -0.101000919 |
| UCKL1 | Activated b cell           | OV | -0.103608393 |
| UCKL1 | Activated cd4+ t cell      | OV | -0.147743863 |
| UCKL1 | Activated t cell           | OV | -0.17055377  |
| UCKL1 | Alanine, aspartate and glu | OV | 0.02661654   |
| UCKL1 | Alcala_apoptosis           | OV | -0.156087767 |
| UCKL1 | Alpha-linolenic acid meta  | OV | 0.074411788  |
| UCKL1 | Amino sugar and nucleoti   | OV | -0.066922794 |
| UCKL1 | Ampk_pathway               | OV | 0.242863511  |
| UCKL1 | Angiogenesis               | OV | -0.250908814 |
| UCKL1 | Arachidonic acid metabol   | OV | -0.136825676 |
| UCKL1 | Arginine and proline met   | OV | -0.136738388 |
| UCKL1 | Arginine biosynthesis      | OV | -0.016081236 |
| UCKL1 | Ascorbate and aldarate m   | OV | -0.007698057 |

|       |                             |    |              |
|-------|-----------------------------|----|--------------|
| UCKL1 | Atypical memory b cell      | OV | -0.11835764  |
| UCKL1 | Ax1+siglecd6+ dendritic ce  | OV | -0.164989845 |
| UCKL1 | B cell                      | OV | -0.213624498 |
| UCKL1 | B1 cell                     | OV | -0.090045183 |
| UCKL1 | Basal cell                  | OV | -0.234641096 |
| UCKL1 | Beta-alanine metabolism     | OV | -0.185883516 |
| UCKL1 | Biosynthesis of unsaturate  | OV | -0.155459327 |
| UCKL1 | Biotin metabolism           | OV | 0.055565216  |
| UCKL1 | Butanoate metabolism        | OV | 0.03251111   |
| UCKL1 | Caffeine metabolism         | OV | -0.132548714 |
| UCKL1 | Cancer stem cell            | OV | -0.259953807 |
| UCKL1 | Cancer stem-like cell       | OV | -0.189438248 |
| UCKL1 | Cd4+ cytotoxic t cell       | OV | -0.177202559 |
| UCKL1 | Cd4+ memory t cell          | OV | -0.13125752  |
| UCKL1 | Cd4+ regulatory t cell      | OV | -0.188603582 |
| UCKL1 | Cd4+ t helper cell          | OV | -0.159011538 |
| UCKL1 | Cd4+cd25+ regulatory t c    | OV | -0.164208659 |
| UCKL1 | Cd8+ cytotoxic t cell       | OV | -0.141786154 |
| UCKL1 | Cd8+ regulatory t cell      | OV | -0.148902791 |
| UCKL1 | Cell_cycle                  | OV | 0.029441135  |
| UCKL1 | Chandran_metastasis_top5    | OV | -0.067807398 |
| UCKL1 | Citrate cycle (tca cycle)   | OV | 0.047556705  |
| UCKL1 | Cysteine and methionine r   | OV | 0.078630924  |
| UCKL1 | Cytokine induced killer ce  | OV | -0.122249028 |
| UCKL1 | D-arginine and d-ornithin   | OV | -0.124625184 |
| UCKL1 | D-glutamine and d-glutan    | OV | -0.028413801 |
| UCKL1 | Dendritic cell              | OV | -0.180061175 |
| UCKL1 | Dna_repair                  | OV | 0.049787896  |
| UCKL1 | Dna_replication             | OV | 0.005840318  |
| UCKL1 | Double-negative memory      | OV | 0.032023675  |
| UCKL1 | Drug metabolism - cytoch    | OV | -0.102375964 |
| UCKL1 | Drug metabolism - other c   | OV | -0.020672293 |
| UCKL1 | E2f_targets                 | OV | 0.051354402  |
| UCKL1 | Ecm_receptor_interaction    | OV | -0.161751518 |
| UCKL1 | Effector cd4+ memory t (    | OV | -0.155883691 |
| UCKL1 | Effector cd8+ memory t (    | OV | -0.178746263 |
| UCKL1 | Effector memory t cell      | OV | -0.185504256 |
| UCKL1 | Effector regulatory t (treg | OV | -0.180913452 |
| UCKL1 | Elvidge_hif1a_targets_up    | OV | -0.109478867 |
| UCKL1 | Endothelial cell            | OV | -0.235906758 |
| UCKL1 | Eosinophil                  | OV | -0.185891209 |
| UCKL1 | Ether lipid metabolism      | OV | -0.032926876 |
| UCKL1 | Exhausted cd4+ t cell       | OV | -0.237258494 |

|       |                                |    |              |
|-------|--------------------------------|----|--------------|
| UCKL1 | Exhausted cd8+ t cell          | OV | -0.216464823 |
| UCKL1 | Exhausted t cell               | OV | -0.123575398 |
| UCKL1 | Fat cell (adipocyte)           | OV | -0.079397636 |
| UCKL1 | Fatty acid biosynthesis        | OV | -0.022022692 |
| UCKL1 | Fatty acid degradation         | OV | 0.016904581  |
| UCKL1 | Fatty acid elongation          | OV | -0.118216519 |
| UCKL1 | Fibroblast                     | OV | -0.196684711 |
| UCKL1 | Folate biosynthesis            | OV | -0.020595858 |
| UCKL1 | Follicular b cell              | OV | -0.133866239 |
| UCKL1 | Follicular dendritic cell      | OV | -0.195712193 |
| UCKL1 | Follicular helper (tfh) t cell | OV | -0.170658762 |
| UCKL1 | Follicular t cell              | OV | -0.109792645 |
| UCKL1 | Foxp3+il-17+ t cell            | OV | -0.094366051 |
| UCKL1 | Fructose and mannose me        | OV | -0.050638755 |
| UCKL1 | G2m_checkpoint                 | OV | -0.002647542 |
| UCKL1 | Galactose metabolism           | OV | -0.048997203 |
| UCKL1 | Galie_tumor_stemness_ge        | OV | -0.227283073 |
| UCKL1 | Glutathione metabolism         | OV | -0.103689525 |
| UCKL1 | Glycerolipid metabolism        | OV | -0.016250089 |
| UCKL1 | Glycerophospholipid metæ       | OV | 0.170234885  |
| UCKL1 | Glycine, serine and threor     | OV | 0.082120384  |
| UCKL1 | Glycolysis / gluconeogene      | OV | -0.052146866 |
| UCKL1 | Glycosaminoglycan biosy1       | OV | -0.237762061 |
| UCKL1 | Glycosaminoglycan biosy1       | OV | -0.235627716 |
| UCKL1 | Glycosaminoglycan biosy1       | OV | -0.141227078 |
| UCKL1 | Glycosaminoglycan degra        | OV | -0.123733894 |
| UCKL1 | Glycosphingolipid biosyn1      | OV | -0.095966637 |
| UCKL1 | Glycosphingolipid biosyn1      | OV | -0.071860219 |
| UCKL1 | Glycosphingolipid biosyn1      | OV | -0.110461956 |
| UCKL1 | Glycosylphosphatidylinos:      | OV | 0.052383149  |
| UCKL1 | Glyoxylate and dicarboxy       | OV | 0.089282648  |
| UCKL1 | Granulocyte                    | OV | -0.188800306 |
| UCKL1 | Hedgehog_signaling             | OV | -0.160086386 |
| UCKL1 | Histidine metabolism           | OV | -0.180231375 |
| UCKL1 | Hypoxia                        | OV | -0.190038329 |
| UCKL1 | Il-17ralpha t cell             | OV | -0.141962794 |
| UCKL1 | Il2_stat5_signaling            | OV | -0.242040848 |
| UCKL1 | Il6_jak_stat3_signaling        | OV | -0.189572579 |
| UCKL1 | Immune_checkpoints_tunr        | OV | -0.178530577 |
| UCKL1 | Immune_inhibition_cytok        | OV | -0.1369791   |
| UCKL1 | Inositol phosphate metabo      | OV | -0.036512899 |
| UCKL1 | Interleukin_6_signaling        | OV | -0.122874272 |
| UCKL1 | Jaeger_metastasis_up           | OV | -0.123777063 |

|       |                             |    |              |
|-------|-----------------------------|----|--------------|
| UCKL1 | Jain_nfkb_signaling         | OV | 0.051825897  |
| UCKL1 | Kras_signaling_up           | OV | -0.280355413 |
| UCKL1 | Linoleic acid metabolism    | OV | 0.009260601  |
| UCKL1 | Lipoic acid metabolism      | OV | 0.122667876  |
| UCKL1 | Lysine degradation          | OV | 0.037278136  |
| UCKL1 | Lysosome                    | OV | -0.178062063 |
| UCKL1 | M1 macrophage               | OV | -0.192080055 |
| UCKL1 | M2 macrophage               | OV | -0.174030301 |
| UCKL1 | Mannose type o-glycan bi    | OV | -0.06225524  |
| UCKL1 | Mapk_signaling_pathway      | OV | -0.172365705 |
| UCKL1 | Mapk3_erk1_activation       | OV | -0.163636287 |
| UCKL1 | Marginal zone b cell        | OV | -0.096701099 |
| UCKL1 | Memory b cell               | OV | -0.122913337 |
| UCKL1 | Mesenchymal cell            | OV | -0.235272268 |
| UCKL1 | Mesenchymal stem cell       | OV | -0.208752497 |
| UCKL1 | Metabolism of xenobiotic    | OV | -0.117693404 |
| UCKL1 | Migrating cancer stem cel   | OV | -0.181873729 |
| UCKL1 | Mitotic_spindle             | OV | -0.014431658 |
| UCKL1 | Monocyte                    | OV | -0.211206627 |
| UCKL1 | Mtor_signaling_pathway      | OV | -0.073667518 |
| UCKL1 | Mtorc1_signaling            | OV | -0.185074841 |
| UCKL1 | Mucin type o-glycan biosy   | OV | -0.182569134 |
| UCKL1 | Myc_targets_v1              | OV | -0.067043619 |
| UCKL1 | Myeloid cell                | OV | -0.18571369  |
| UCKL1 | N-glycan biosynthesis       | OV | -0.134400333 |
| UCKL1 | Naive b cell                | OV | 0.026050394  |
| UCKL1 | Naive cd4+ t cell           | OV | -0.189992811 |
| UCKL1 | Naive cd8+ t cell           | OV | -0.206670476 |
| UCKL1 | Natural killer cell         | OV | -0.190269049 |
| UCKL1 | Natural killer t (nkt) cell | OV | -0.103222802 |
| UCKL1 | Natural regulatory t (treg) | OV | -0.22748047  |
| UCKL1 | Neomycin, kanamycin and     | OV | 0.014485159  |
| UCKL1 | Neutrophil                  | OV | -0.222448983 |
| UCKL1 | Nicotinate and nicotinami   | OV | -0.081422117 |
| UCKL1 | Nitrogen metabolism         | OV | -0.101618908 |
| UCKL1 | Nod_like_receptor_signal    | OV | -0.170876291 |
| UCKL1 | Notch_signaling             | OV | -0.06430255  |
| UCKL1 | One carbon pool by folate   | OV | 0.012187417  |
| UCKL1 | Other glycan degradation    | OV | -0.050420745 |
| UCKL1 | Other types of o-glycan b   | OV | 0.068819796  |
| UCKL1 | Oxidative phosphorylatio    | OV | 0.009963467  |
| UCKL1 | P53_pathway                 | OV | -0.177404643 |
| UCKL1 | P53_signaling_pathway       | OV | -0.150099257 |

|       |                            |    |              |
|-------|----------------------------|----|--------------|
| UCKL1 | Pantothenate and coa bios  | OV | -0.121932722 |
| UCKL1 | Pentose and glucuronate i  | OV | -0.082592031 |
| UCKL1 | Pentose phosphate pathwa   | OV | -0.089507878 |
| UCKL1 | Pericyte                   | OV | -0.203379888 |
| UCKL1 | Phenylalanine metabolism   | OV | -0.113917249 |
| UCKL1 | Phenylalanine, tyrosine ar | OV | -0.04449146  |
| UCKL1 | Phosphonate and phosphir   | OV | -0.099655351 |
| UCKL1 | Pi3k_akt_activation        | OV | -0.217525146 |
| UCKL1 | Pi3k_akt_mtor_signaling    | OV | -0.129994894 |
| UCKL1 | Porphyrin and chlorophyl   | OV | -0.012606645 |
| UCKL1 | Primary bile acid biosynt  | OV | -0.129104918 |
| UCKL1 | Propanoate metabolism      | OV | 0.072238048  |
| UCKL1 | Purine metabolism          | OV | -0.028132648 |
| UCKL1 | Pyrimidine metabolism      | OV | 0.00390557   |
| UCKL1 | Pyruvate metabolism        | OV | 0.057416706  |
| UCKL1 | Regulation_of_autophagy    | OV | 0.025218597  |
| UCKL1 | Retinol metabolism         | OV | -0.195567195 |
| UCKL1 | Riboflavin metabolism      | OV | -0.018379134 |
| UCKL1 | Schmahl_pdgf_signaling     | OV | -0.160520929 |
| UCKL1 | Selenocompound metabol     | OV | 0.042966182  |
| UCKL1 | Signaling_by_hippo         | OV | -0.107721505 |
| UCKL1 | Sphingolipid metabolism    | OV | -0.16280883  |
| UCKL1 | Starch and sucrose metabo  | OV | -0.044220046 |
| UCKL1 | Steroid biosynthesis       | OV | -0.067470826 |
| UCKL1 | Steroid hormone biosynth   | OV | -0.158348425 |
| UCKL1 | Sulfur metabolism          | OV | -0.128856184 |
| UCKL1 | Synthesis and degradation  | OV | 0.056380174  |
| UCKL1 | T helper cell              | OV | -0.205559581 |
| UCKL1 | T helper1 (th1) cell       | OV | -0.180802268 |
| UCKL1 | T helper17 (th17) cell     | OV | -0.136854319 |
| UCKL1 | T helper2 (th2) cell       | OV | -0.19005309  |
| UCKL1 | T helper9 (th9) cell       | OV | -0.154244396 |
| UCKL1 | Taurine and hypotaurine r  | OV | 0.085684711  |
| UCKL1 | Terpenoid backbone biosy   | OV | -0.081699253 |
| UCKL1 | Tgf_beta_signaling_pathw   | OV | -0.182287485 |
| UCKL1 | Thiamine metabolism        | OV | 0.103233188  |
| UCKL1 | Tnfa_signaling_via_nfk     | OV | -0.170327305 |
| UCKL1 | Tryptophan metabolism      | OV | -0.07110942  |
| UCKL1 | Tumor endothelial cell     | OV | -0.044795289 |
| UCKL1 | Tyrosine metabolism        | OV | -0.128854274 |
| UCKL1 | Ubiquinone and other ter   | OV | 0.044526235  |
| UCKL1 | Valine, leucine and isoleu | OV | -0.124891564 |
| UCKL1 | Valine, leucine and isoleu | OV | -0.011290015 |

|       |                            |    |              |
|-------|----------------------------|----|--------------|
| UCKL1 | Vascular endothelial cell  | OV | -0.125600209 |
| UCKL1 | Vascular smooth muscle c   | OV | -0.142179241 |
| UCKL1 | Vegf_signaling_pathway     | OV | -0.085621786 |
| UCKL1 | Vitamin b6 metabolism      | OV | -0.000479998 |
| UCKL1 | Willert_wnt_signaling      | OV | -0.12781825  |
| UCKL1 | Wnt_beta_catenin_signali   | OV | -0.05889456  |
| UPP1  | Abnormal plasma cell       | OV | 0.042068347  |
| UPP1  | Activated b cell           | OV | 0.416258722  |
| UPP1  | Activated cd4+ t cell      | OV | 0.469224722  |
| UPP1  | Activated t cell           | OV | 0.414628548  |
| UPP1  | Alanine, aspartate and glu | OV | 0.023986946  |
| UPP1  | Alcala_apoptosis           | OV | 0.373478156  |
| UPP1  | Alpha-linolenic acid meta  | OV | 0.090073172  |
| UPP1  | Amino sugar and nucleoti   | OV | 0.523308092  |
| UPP1  | Ampk_pathway               | OV | -0.11512027  |
| UPP1  | Angiogenesis               | OV | 0.319144398  |
| UPP1  | Arachidonic acid metabol   | OV | 0.365207968  |
| UPP1  | Arginine and proline meta  | OV | 0.182311398  |
| UPP1  | Arginine biosynthesis      | OV | 0.130711352  |
| UPP1  | Ascorbate and aldarate me  | OV | -0.130671823 |
| UPP1  | Atypical memory b cell     | OV | 0.229493451  |
| UPP1  | Axl+siglec6+ dendritic ce  | OV | 0.398420258  |
| UPP1  | B cell                     | OV | 0.364450725  |
| UPP1  | B1 cell                    | OV | 0.282434436  |
| UPP1  | Basal cell                 | OV | 0.424087717  |
| UPP1  | Beta-alanine metabolism    | OV | 0.06711771   |
| UPP1  | Biosynthesis of unsaturate | OV | 0.241957874  |
| UPP1  | Biotin metabolism          | OV | 0.120163697  |
| UPP1  | Butanoate metabolism       | OV | -0.018545953 |
| UPP1  | Caffeine metabolism        | OV | 0.005076613  |
| UPP1  | Cancer stem cell           | OV | 0.247100543  |
| UPP1  | Cancer stem-like cell      | OV | 0.262067566  |
| UPP1  | Cd4+ cytotoxic t cell      | OV | 0.436612265  |
| UPP1  | Cd4+ memory t cell         | OV | 0.34438337   |
| UPP1  | Cd4+ regulatory t cell     | OV | 0.3991669    |
| UPP1  | Cd4+ t helper cell         | OV | 0.413514835  |
| UPP1  | Cd4+cd25+ regulatory t c   | OV | 0.427338492  |
| UPP1  | Cd8+ cytotoxic t cell      | OV | 0.449348113  |
| UPP1  | Cd8+ regulatory t cell     | OV | 0.41605863   |
| UPP1  | Cell_cycle                 | OV | -0.007581539 |
| UPP1  | Chandran_metastasis_top5   | OV | -0.296848503 |
| UPP1  | Citrate cycle (tca cycle)  | OV | 0.327539476  |
| UPP1  | Cysteine and methionine r  | OV | 0.081907065  |

|      |                              |    |              |
|------|------------------------------|----|--------------|
| UPP1 | Cytokine induced killer cell | OV | 0.170458897  |
| UPP1 | D-arginine and d-ornithin    | OV | 0.131575817  |
| UPP1 | D-glutamine and d-glutan     | OV | -0.042613425 |
| UPP1 | Dendritic cell               | OV | 0.501632376  |
| UPP1 | Dna_repair                   | OV | 0.206028677  |
| UPP1 | Dna_replication              | OV | 0.108823052  |
| UPP1 | Double-negative memory       | OV | 0.202951184  |
| UPP1 | Drug metabolism - cytoch     | OV | 0.029009666  |
| UPP1 | Drug metabolism - other      | OV | 0.268785682  |
| UPP1 | E2f_targets                  | OV | 0.02577488   |
| UPP1 | Ecm_receptor_interaction     | OV | 0.169195908  |
| UPP1 | Effector cd4+ memory t       | OV | 0.40235609   |
| UPP1 | Effector cd8+ memory t       | OV | 0.433351078  |
| UPP1 | Effector memory t cell       | OV | 0.405647017  |
| UPP1 | Effector regulatory t (treg  | OV | 0.383528205  |
| UPP1 | Elvidge_hif1a_targets_up     | OV | 0.193058433  |
| UPP1 | Endothelial cell             | OV | 0.267725024  |
| UPP1 | Eosinophil                   | OV | 0.511328414  |
| UPP1 | Ether lipid metabolism       | OV | 0.102824882  |
| UPP1 | Exhausted cd4+ t cell        | OV | 0.510027605  |
| UPP1 | Exhausted cd8+ t cell        | OV | 0.441215558  |
| UPP1 | Exhausted t cell             | OV | 0.406262245  |
| UPP1 | Fat cell (adipocyte)         | OV | 0.020999863  |
| UPP1 | Fatty acid biosynthesis      | OV | 0.112511334  |
| UPP1 | Fatty acid degradation       | OV | 0.166430402  |
| UPP1 | Fatty acid elongation        | OV | 0.233383918  |
| UPP1 | Fibroblast                   | OV | 0.340350198  |
| UPP1 | Folate biosynthesis          | OV | 0.169062425  |
| UPP1 | Follicular b cell            | OV | 0.354216468  |
| UPP1 | Follicular dendritic cell    | OV | 0.170856109  |
| UPP1 | Follicular helper (tfh) t    | OV | 0.404018231  |
| UPP1 | Follicular t cell            | OV | 0.380905875  |
| UPP1 | Foxp3+il-17+ t cell          | OV | 0.364271499  |
| UPP1 | Fructose and mannose me      | OV | 0.331102487  |
| UPP1 | G2m_checkpoint               | OV | -0.06270477  |
| UPP1 | Galactose metabolism         | OV | 0.379175416  |
| UPP1 | Galie_tumor_stemness_ge      | OV | 0.164644804  |
| UPP1 | Glutathione metabolism       | OV | 0.355932782  |
| UPP1 | Glycerolipid metabolism      | OV | 0.073612071  |
| UPP1 | Glycerophospholipid met      | OV | 0.003731763  |
| UPP1 | Glycine, serine and threor   | OV | 0.150501328  |
| UPP1 | Glycolysis / gluconeogene    | OV | 0.349523636  |
| UPP1 | Glycosaminoglycan biosy      | OV | 0.191455629  |

|      |                           |    |              |
|------|---------------------------|----|--------------|
| UPP1 | Glycosaminoglycan biosyn  | OV | -0.008507975 |
| UPP1 | Glycosaminoglycan biosyn  | OV | 0.261432736  |
| UPP1 | Glycosaminoglycan degra   | OV | 0.176399915  |
| UPP1 | Glycosphingolipid biosyn  | OV | 0.434751066  |
| UPP1 | Glycosphingolipid biosyn  | OV | 0.528549015  |
| UPP1 | Glycosphingolipid biosyn  | OV | 0.318032605  |
| UPP1 | Glycosylphosphatidylinos  | OV | 0.055965933  |
| UPP1 | Glyoxylate and dicarboxy  | OV | 0.19624978   |
| UPP1 | Granulocyte               | OV | 0.485816609  |
| UPP1 | Hedgehog_signaling        | OV | -0.146122892 |
| UPP1 | Histidine metabolism      | OV | 0.15640284   |
| UPP1 | Hypoxia                   | OV | 0.429095789  |
| UPP1 | Il-17ralpha t cell        | OV | 0.423168862  |
| UPP1 | Il2_stat5_signaling       | OV | 0.509145467  |
| UPP1 | Il6_jak_stat3_signaling   | OV | 0.518685156  |
| UPP1 | Immune_checkpoints_tun    | OV | 0.503434124  |
| UPP1 | Immune_inhibition_cytok   | OV | 0.532320335  |
| UPP1 | Inositol phosphate metabo | OV | -0.123448794 |
| UPP1 | Interleukin_6_signaling   | OV | 0.034518372  |
| UPP1 | Jaeger_metastasis_up      | OV | 0.335221943  |
| UPP1 | Jain_nfkb_signaling       | OV | -0.157713007 |
| UPP1 | Kras_signaling_up         | OV | 0.45434405   |
| UPP1 | Linoleic acid metabolism  | OV | -0.11483947  |
| UPP1 | Lipoic acid metabolism    | OV | -0.116260954 |
| UPP1 | Lysine degradation        | OV | -0.422622464 |
| UPP1 | Lysosome                  | OV | 0.434321339  |
| UPP1 | M1 macrophage             | OV | 0.496084963  |
| UPP1 | M2 macrophage             | OV | 0.498779338  |
| UPP1 | Mannose type o-glycan bi  | OV | -0.052217595 |
| UPP1 | Mapk_signaling_pathway    | OV | 0.203875436  |
| UPP1 | Mapk3_erk1_activation     | OV | 0.140858414  |
| UPP1 | Marginal zone b cell      | OV | 0.393087843  |
| UPP1 | Memory b cell             | OV | 0.342557081  |
| UPP1 | Mesenchymal cell          | OV | 0.273548554  |
| UPP1 | Mesenchymal stem cell     | OV | 0.409353213  |
| UPP1 | Metabolism of xenobiotic  | OV | 0.111340775  |
| UPP1 | Migrating cancer stem cel | OV | 0.232055378  |
| UPP1 | Mitotic_spindle           | OV | -0.213499542 |
| UPP1 | Monocyte                  | OV | 0.575083263  |
| UPP1 | Mtor_signaling_pathway    | OV | -0.075261655 |
| UPP1 | Mtorc1_signaling          | OV | 0.458436787  |
| UPP1 | Mucin type o-glycan bios  | OV | 0.135004257  |
| UPP1 | Myc_targets_v1            | OV | 0.057916248  |



|      |                                          |    |              |
|------|------------------------------------------|----|--------------|
| UPP1 | Myeloid cell                             | OV | 0.479089672  |
| UPP1 | N-glycan biosynthesis                    | OV | 0.380021288  |
| UPP1 | Naive b cell                             | OV | 0.220432483  |
| UPP1 | Naive cd4+ t cell                        | OV | 0.218974907  |
| UPP1 | Naive cd8+ t cell                        | OV | -0.079577918 |
| UPP1 | Natural killer cell                      | OV | 0.481292562  |
| UPP1 | Natural killer t (nkt) cell              | OV | 0.434875226  |
| UPP1 | Natural regulatory t (treg)              | OV | 0.359431196  |
| UPP1 | Neomycin, kanamycin and                  | OV | 0.080919447  |
| UPP1 | Neutrophil                               | OV | 0.593886285  |
| UPP1 | Nicotinate and nicotinamide              | OV | 0.376262321  |
| UPP1 | Nitrogen metabolism                      | OV | -0.072743191 |
| UPP1 | Nod_like_receptor_signaling              | OV | 0.46862173   |
| UPP1 | Notch_signaling                          | OV | 0.024667423  |
| UPP1 | One carbon pool by folate                | OV | -0.101772539 |
| UPP1 | Other glycan degradation                 | OV | 0.20240377   |
| UPP1 | Other types of o-glycan biosynthesis     | OV | -0.07157705  |
| UPP1 | Oxidative phosphorylation                | OV | 0.364377024  |
| UPP1 | P53_pathway                              | OV | 0.45958034   |
| UPP1 | P53_signaling_pathway                    | OV | 0.199975703  |
| UPP1 | Pantothenate and coenzyme biosynthesis   | OV | 0.272940638  |
| UPP1 | Pentose and glucuronate interconversions | OV | 0.125414942  |
| UPP1 | Pentose phosphate pathway                | OV | 0.297571294  |
| UPP1 | Pericyte                                 | OV | 0.28794062   |
| UPP1 | Phenylalanine metabolism                 | OV | 0.248949449  |
| UPP1 | Phenylalanine, tyrosine and tryptophan   | OV | 0.218845797  |
| UPP1 | Phosphonate and phosphite metabolism     | OV | 0.288052502  |
| UPP1 | Pi3k_akt_activation                      | OV | -0.103878063 |
| UPP1 | Pi3k_akt_mtor_signaling                  | OV | 0.422772236  |
| UPP1 | Porphyrin and chlorophyll biosynthesis   | OV | 0.220574222  |
| UPP1 | Primary bile acid biosynthesis           | OV | 0.386208799  |
| UPP1 | Propanoate metabolism                    | OV | -0.082392627 |
| UPP1 | Purine metabolism                        | OV | 0.219091599  |
| UPP1 | Pyrimidine metabolism                    | OV | 0.261517147  |
| UPP1 | Pyruvate metabolism                      | OV | 0.268684125  |
| UPP1 | Regulation_of_autophagy                  | OV | 0.26611151   |
| UPP1 | Retinol metabolism                       | OV | 0.071824203  |
| UPP1 | Riboflavin metabolism                    | OV | 0.322776907  |
| UPP1 | Schmahl_pdgf_signaling                   | OV | 0.080133511  |
| UPP1 | Selenocompound metabolism                | OV | -0.242366556 |
| UPP1 | Signaling_by_hippo                       | OV | -0.229576483 |
| UPP1 | Sphingolipid metabolism                  | OV | 0.337635679  |
| UPP1 | Starch and sucrose metabolism            | OV | 0.140446704  |

|      |                            |    |              |
|------|----------------------------|----|--------------|
| UPP1 | Steroid biosynthesis       | OV | 0.475152756  |
| UPP1 | Steroid hormone biosynth   | OV | 0.046774596  |
| UPP1 | Sulfur metabolism          | OV | 0.221761196  |
| UPP1 | Synthesis and degradation  | OV | 0.075581631  |
| UPP1 | T helper cell              | OV | 0.440784262  |
| UPP1 | T helper1 (th1) cell       | OV | 0.459572837  |
| UPP1 | T helper17 (th17) cell     | OV | 0.442854868  |
| UPP1 | T helper2 (th2) cell       | OV | 0.376635412  |
| UPP1 | T helper9 (th9) cell       | OV | 0.377719225  |
| UPP1 | Taurine and hypotaurine r  | OV | -0.12927437  |
| UPP1 | Terpenoid backbone biosy   | OV | 0.165707311  |
| UPP1 | Tgf_beta_signaling_pathw   | OV | -0.079611018 |
| UPP1 | Thiamine metabolism        | OV | 0.100927792  |
| UPP1 | Tnfa_signaling_via_nfbk    | OV | 0.442792401  |
| UPP1 | Tryptophan metabolism      | OV | 0.264033294  |
| UPP1 | Tumor endothelial cell     | OV | 0.062676159  |
| UPP1 | Tyrosine metabolism        | OV | 0.196461652  |
| UPP1 | Ubiquinone and other terf  | OV | 0.190705064  |
| UPP1 | Valine, leucine and isoleu | OV | 0.309811345  |
| UPP1 | Valine, leucine and isoleu | OV | 0.062319748  |
| UPP1 | Vascular endothelial cell  | OV | 0.35667025   |
| UPP1 | Vascular smooth muscle c   | OV | 0.030961279  |
| UPP1 | Vegf_signaling_pathway     | OV | 0.239801799  |
| UPP1 | Vitamin b6 metabolism      | OV | 0.17512667   |
| UPP1 | Willert_wnt_signaling      | OV | 0.327590304  |
| UPP1 | Wnt_beta_catenin_signali   | OV | -0.38043545  |
| UPP2 | Abnormal plasma cell       | OV | -0.215338606 |
| UPP2 | Activated b cell           | OV | -0.010169096 |
| UPP2 | Activated cd4+ t cell      | OV | -0.07540879  |
| UPP2 | Activated t cell           | OV | -0.118450092 |
| UPP2 | Alanine, aspartate and glu | OV | -0.006126566 |
| UPP2 | Alcala_apoptosis           | OV | -0.060909197 |
| UPP2 | Alpha-linolenic acid meta  | OV | -0.028648545 |
| UPP2 | Amino sugar and nucleoti   | OV | -0.073577143 |
| UPP2 | Ampk_pathway               | OV | -0.123268325 |
| UPP2 | Angiogenesis               | OV | -0.191358273 |
| UPP2 | Arachidonic acid metabol   | OV | -0.065781069 |
| UPP2 | Arginine and proline metæ  | OV | -0.100903956 |
| UPP2 | Arginine biosynthesis      | OV | -0.075511374 |
| UPP2 | Ascorbate and aldarate mε  | OV | 0.052653446  |
| UPP2 | Atypical memory b cell     | OV | -0.169497312 |
| UPP2 | Axl+siglec6+ dendritic ce  | OV | -0.074667379 |
| UPP2 | B cell                     | OV | 0.010797228  |

|      |                             |    |              |
|------|-----------------------------|----|--------------|
| UPP2 | B1 cell                     | OV | -0.04755533  |
| UPP2 | Basal cell                  | OV | -0.132926282 |
| UPP2 | Beta-alanine metabolism     | OV | 0.120363359  |
| UPP2 | Biosynthesis of unsaturate  | OV | -0.227307835 |
| UPP2 | Biotin metabolism           | OV | 0.056758454  |
| UPP2 | Butanoate metabolism        | OV | 0.143111729  |
| UPP2 | Caffeine metabolism         | OV | 0.011851152  |
| UPP2 | Cancer stem cell            | OV | -0.205999663 |
| UPP2 | Cancer stem-like cell       | OV | -0.102832264 |
| UPP2 | Cd4+ cytotoxic t cell       | OV | -0.034384616 |
| UPP2 | Cd4+ memory t cell          | OV | -0.122918539 |
| UPP2 | Cd4+ regulatory t cell      | OV | -0.095409655 |
| UPP2 | Cd4+ t helper cell          | OV | -0.073953297 |
| UPP2 | Cd4+cd25+ regulatory t c    | OV | -0.08356795  |
| UPP2 | Cd8+ cytotoxic t cell       | OV | -0.045045874 |
| UPP2 | Cd8+ regulatory t cell      | OV | -0.10222477  |
| UPP2 | Cell_cycle                  | OV | -0.092624657 |
| UPP2 | Chandran_metastasis_top5    | OV | 0.043209654  |
| UPP2 | Citrate cycle (tca cycle)   | OV | -0.00105213  |
| UPP2 | Cysteine and methionine r   | OV | 0.026975784  |
| UPP2 | Cytokine induced killer c   | OV | -0.126927346 |
| UPP2 | D-arginine and d-ornithin   | OV | -0.005814455 |
| UPP2 | D-glutamine and d-glutan    | OV | 0.110753446  |
| UPP2 | Dendritic cell              | OV | -0.060090937 |
| UPP2 | Dna_repair                  | OV | -0.06117297  |
| UPP2 | Dna_replication             | OV | -0.078573848 |
| UPP2 | Double-negative memory      | OV | -0.071131933 |
| UPP2 | Drug metabolism - cytoch    | OV | -0.007960498 |
| UPP2 | Drug metabolism - other c   | OV | -0.015470694 |
| UPP2 | E2f_targets                 | OV | -0.061868289 |
| UPP2 | Ecm_receptor_interaction    | OV | -0.233481624 |
| UPP2 | Effector cd4+ memory t (    | OV | -0.068223645 |
| UPP2 | Effector cd8+ memory t (    | OV | -0.030274692 |
| UPP2 | Effector memory t cell      | OV | -0.121140948 |
| UPP2 | Effector regulatory t (treg | OV | -0.085366246 |
| UPP2 | Elvidge_hif1a_targets_up    | OV | -0.135283187 |
| UPP2 | Endothelial cell            | OV | -0.227545949 |
| UPP2 | Eosinophil                  | OV | -0.042078665 |
| UPP2 | Ether lipid metabolism      | OV | 0.034302795  |
| UPP2 | Exhausted cd4+ t cell       | OV | -0.054925502 |
| UPP2 | Exhausted cd8+ t cell       | OV | -0.045635657 |
| UPP2 | Exhausted t cell            | OV | -0.052993745 |
| UPP2 | Fat cell (adipocyte)        | OV | -0.162757546 |

|      |                              |    |              |
|------|------------------------------|----|--------------|
| UPP2 | Fatty acid biosynthesis      | OV | 0.069162087  |
| UPP2 | Fatty acid degradation       | OV | 0.127678292  |
| UPP2 | Fatty acid elongation        | OV | -0.021828107 |
| UPP2 | Fibroblast                   | OV | -0.224883282 |
| UPP2 | Folate biosynthesis          | OV | -0.053533783 |
| UPP2 | Follicular b cell            | OV | -0.027911178 |
| UPP2 | Follicular dendritic cell    | OV | -0.0649746   |
| UPP2 | Follicular helper (tfh) t ce | OV | -0.082586573 |
| UPP2 | Follicular t cell            | OV | -0.043505009 |
| UPP2 | Foxp3+il-17+ t cell          | OV | -0.114029187 |
| UPP2 | Fructose and mannose me      | OV | -0.045375142 |
| UPP2 | G2m_checkpoint               | OV | -0.095612959 |
| UPP2 | Galactose metabolism         | OV | -0.095073976 |
| UPP2 | Galie_tumor_stemness_ge      | OV | -0.195924283 |
| UPP2 | Glutathione metabolism       | OV | -0.049308901 |
| UPP2 | Glycerolipid metabolism      | OV | -0.025101714 |
| UPP2 | Glycerophospholipid metæ     | OV | 0.041312994  |
| UPP2 | Glycine, serine and threor   | OV | 0.012270973  |
| UPP2 | Glycolysis / gluconeogene    | OV | -0.069220753 |
| UPP2 | Glycosaminoglycan biosy      | OV | -0.257828127 |
| UPP2 | Glycosaminoglycan biosy      | OV | -0.164170118 |
| UPP2 | Glycosaminoglycan biosy      | OV | -0.140746588 |
| UPP2 | Glycosaminoglycan degra      | OV | 0.011308052  |
| UPP2 | Glycosphingolipid biosyn     | OV | -0.170606206 |
| UPP2 | Glycosphingolipid biosyn     | OV | -0.178204871 |
| UPP2 | Glycosphingolipid biosyn     | OV | -0.070017311 |
| UPP2 | Glycosylphosphatidylinos     | OV | -0.05815702  |
| UPP2 | Glyoxylate and dicarboxy     | OV | 0.037941775  |
| UPP2 | Granulocyte                  | OV | -0.068793272 |
| UPP2 | Hedgehog_signaling           | OV | -0.102219006 |
| UPP2 | Histidine metabolism         | OV | 0.010536129  |
| UPP2 | Hypoxia                      | OV | -0.134428948 |
| UPP2 | Il-17alpha t cell            | OV | -0.108251755 |
| UPP2 | Il2_stat5_signaling          | OV | -0.170557825 |
| UPP2 | Il6_jak_stat3_signaling      | OV | -0.097917026 |
| UPP2 | Immune_checkpoints_tun       | OV | -0.055130252 |
| UPP2 | Immune_inhibition_cytok      | OV | -0.104855908 |
| UPP2 | Inositol phosphate metabo    | OV | -0.006796702 |
| UPP2 | Interleukin_6_signaling      | OV | 0.049911176  |
| UPP2 | Jaeger_metastasis_up         | OV | -0.243054969 |
| UPP2 | Jain_nfkb_signaling          | OV | 0.018981577  |
| UPP2 | Kras_signaling_up            | OV | -0.190841061 |
| UPP2 | Linoleic acid metabolism     | OV | 0.002713558  |

|      |                             |    |              |
|------|-----------------------------|----|--------------|
| UPP2 | Lipoic acid metabolism      | OV | 0.104916927  |
| UPP2 | Lysine degradation          | OV | -0.028808114 |
| UPP2 | Lysosome                    | OV | -0.093096116 |
| UPP2 | M1 macrophage               | OV | -0.033325407 |
| UPP2 | M2 macrophage               | OV | -0.082056786 |
| UPP2 | Mannose type o-glycan bi    | OV | -0.075094728 |
| UPP2 | Mapk_signaling_pathway      | OV | -0.160135146 |
| UPP2 | Mapk3_erk1_activation       | OV | 0.068874518  |
| UPP2 | Marginal zone b cell        | OV | -0.067663067 |
| UPP2 | Memory b cell               | OV | -0.033316515 |
| UPP2 | Mesenchymal cell            | OV | -0.253648671 |
| UPP2 | Mesenchymal stem cell       | OV | -0.172034265 |
| UPP2 | Metabolism of xenobiotic    | OV | 0.016994804  |
| UPP2 | Migrating cancer stem cel   | OV | 0.01784168   |
| UPP2 | Mitotic_spindle             | OV | -0.120155792 |
| UPP2 | Monocyte                    | OV | -0.060340479 |
| UPP2 | Mtor_signaling_pathway      | OV | 0.061183588  |
| UPP2 | Mtorc1_signaling            | OV | -0.105032939 |
| UPP2 | Mucin type o-glycan bios    | OV | -0.145001027 |
| UPP2 | Myc_targets_v1              | OV | -0.020072682 |
| UPP2 | Myeloid cell                | OV | -0.071932788 |
| UPP2 | N-glycan biosynthesis       | OV | -0.172813911 |
| UPP2 | Naive b cell                | OV | -0.058155293 |
| UPP2 | Naive cd4+ t cell           | OV | -0.030895306 |
| UPP2 | Naive cd8+ t cell           | OV | 0.005998546  |
| UPP2 | Natural killer cell         | OV | -0.091540411 |
| UPP2 | Natural killer t (nkt) cell | OV | 0.024381078  |
| UPP2 | Natural regulatory t (treg) | OV | -0.094763504 |
| UPP2 | Neomycin, kanamycin and     | OV | -0.074144812 |
| UPP2 | Neutrophil                  | OV | -0.076296208 |
| UPP2 | Nicotinate and nicotinami   | OV | 0.035456401  |
| UPP2 | Nitrogen metabolism         | OV | 0.015725396  |
| UPP2 | Nod_like_receptor_signal    | OV | -0.012100402 |
| UPP2 | Notch_signaling             | OV | -0.179964819 |
| UPP2 | One carbon pool by folate   | OV | 0.016226481  |
| UPP2 | Other glycan degradation    | OV | -0.033962131 |
| UPP2 | Other types of o-glycan b   | OV | -0.044536171 |
| UPP2 | Oxidative phosphorylatior   | OV | -0.018366207 |
| UPP2 | P53_pathway                 | OV | -0.005899694 |
| UPP2 | P53_signaling_pathway       | OV | -0.006940647 |
| UPP2 | Pantothenate and coa bios   | OV | -0.033366899 |
| UPP2 | Pentose and glucuronate i   | OV | -0.000612136 |
| UPP2 | Pentose phosphate pathwa    | OV | -0.031388417 |

|      |                            |    |              |
|------|----------------------------|----|--------------|
| UPP2 | Pericyte                   | OV | -0.227259068 |
| UPP2 | Phenylalanine metabolism   | OV | 0.003876596  |
| UPP2 | Phenylalanine, tyrosine ar | OV | -0.079781488 |
| UPP2 | Phosphonate and phosphir   | OV | 0.046314105  |
| UPP2 | Pi3k_akt_activation        | OV | 0.010556128  |
| UPP2 | Pi3k_akt_mtor_signaling    | OV | -0.151207499 |
| UPP2 | Porphyrin and chlorophyl   | OV | 0.043440125  |
| UPP2 | Primary bile acid biosynt  | OV | 0.015878214  |
| UPP2 | Propanoate metabolism      | OV | 0.200208262  |
| UPP2 | Purine metabolism          | OV | -0.070232163 |
| UPP2 | Pyrimidine metabolism      | OV | -0.058115742 |
| UPP2 | Pyruvate metabolism        | OV | 0.06477364   |
| UPP2 | Regulation_of_autophagy    | OV | -0.006959279 |
| UPP2 | Retinol metabolism         | OV | -0.080560263 |
| UPP2 | Riboflavin metabolism      | OV | -0.096995777 |
| UPP2 | Schmahl_pdgf_signaling     | OV | -0.035626426 |
| UPP2 | Selenocompound metabol     | OV | 0.009399377  |
| UPP2 | Signaling_by_hippo         | OV | -0.107275809 |
| UPP2 | Sphingolipid metabolism    | OV | -0.170234737 |
| UPP2 | Starch and sucrose metabo  | OV | -0.024293794 |
| UPP2 | Steroid biosynthesis       | OV | -0.056971505 |
| UPP2 | Steroid hormone biosynth   | OV | 0.077276228  |
| UPP2 | Sulfur metabolism          | OV | -0.114037957 |
| UPP2 | Synthesis and degradation  | OV | 0.080693229  |
| UPP2 | T helper cell              | OV | -0.108693773 |
| UPP2 | T helper1 (th1) cell       | OV | -0.057422793 |
| UPP2 | T helper17 (th17) cell     | OV | -0.069236045 |
| UPP2 | T helper2 (th2) cell       | OV | -0.088779668 |
| UPP2 | T helper9 (th9) cell       | OV | -0.083902735 |
| UPP2 | Taurine and hypotaurine r  | OV | -0.11193907  |
| UPP2 | Terpenoid backbone biosy   | OV | 0.057277815  |
| UPP2 | Tgf_beta_signaling_pathw   | OV | -0.223559853 |
| UPP2 | Thiamine metabolism        | OV | 0.020801931  |
| UPP2 | Tnfa_signaling_via_nfkb    | OV | -0.057831641 |
| UPP2 | Tryptophan metabolism      | OV | -0.034400091 |
| UPP2 | Tumor endothelial cell     | OV | 0.043504757  |
| UPP2 | Tyrosine metabolism        | OV | -0.047176181 |
| UPP2 | Ubiquinone and other ter   | OV | 0.052416258  |
| UPP2 | Valine, leucine and isoleu | OV | -0.028463516 |
| UPP2 | Valine, leucine and isoleu | OV | 0.182672771  |
| UPP2 | Vascular endothelial cell  | OV | -0.157263552 |
| UPP2 | Vascular smooth muscle c   | OV | -0.210830383 |
| UPP2 | Vegf_signaling_pathway     | OV | -0.115955515 |

|      |                                      |      |              |
|------|--------------------------------------|------|--------------|
| UPP2 | Vitamin b6 metabolism                | OV   | 0.003315229  |
| UPP2 | Willert_wnt_signaling                | OV   | -0.17359732  |
| UPP2 | Wnt_beta_catenin_signali             | OV   | -0.081705411 |
| CDA  | Abnormal plasma cell                 | PAAD | -0.239072143 |
| CDA  | Activated b cell                     | PAAD | 0.030483452  |
| CDA  | Activated cd4+ t cell                | PAAD | 0.118229104  |
| CDA  | Activated t cell                     | PAAD | 0.093419203  |
| CDA  | Alanine, aspartate and glu           | PAAD | -0.143729474 |
| CDA  | Alcala_apoptosis                     | PAAD | 0.243744165  |
| CDA  | Alpha-linolenic acid meta            | PAAD | 0.00414388   |
| CDA  | Amino sugar and nucleoti             | PAAD | 0.225931992  |
| CDA  | Ampk_pathway                         | PAAD | 0.087003196  |
| CDA  | Angiogenesis                         | PAAD | 0.342976282  |
| CDA  | Arachidonic acid metabol             | PAAD | 0.211241884  |
| CDA  | Arginine and proline metε            | PAAD | -0.045807204 |
| CDA  | Arginine biosynthesis                | PAAD | -0.042889897 |
| CDA  | Ascorbate and aldarate mε            | PAAD | 0.005474138  |
| CDA  | Atypical memory b cell               | PAAD | 0.083798681  |
| CDA  | Axl+siglec6+ dendritic ce            | PAAD | 0.280430456  |
| CDA  | B cell                               | PAAD | 0.04717026   |
| CDA  | B1 cell                              | PAAD | -0.095764992 |
| CDA  | Basal cell                           | PAAD | 0.637726044  |
| CDA  | Beta-alanine metabolism              | PAAD | -0.155797237 |
| CDA  | Biosynthesis of unsaturate           | PAAD | -0.051977207 |
| CDA  | Biotin metabolism                    | PAAD | -0.29119274  |
| CDA  | Butanoate metabolism                 | PAAD | -0.347209092 |
| CDA  | Caffeine metabolism                  | PAAD | 0.166648441  |
| CDA  | Cancer stem cell                     | PAAD | 0.32989767   |
| CDA  | Cancer stem-like cell                | PAAD | 0.086774691  |
| CDA  | Cd4+ cytotoxic t cell                | PAAD | 0.158284049  |
| CDA  | Cd4+ memory t cell                   | PAAD | -0.003141129 |
| CDA  | Cd4+ regulatory t cell               | PAAD | 0.167121922  |
| CDA  | Cd4+ t helper cell                   | PAAD | 0.045336448  |
| CDA  | Cd4+cd25+ regulatory t c             | PAAD | 0.077752483  |
| CDA  | Cd8+ cytotoxic t cell                | PAAD | 0.026866375  |
| CDA  | Cd8+ regulatory t cell               | PAAD | -0.063859392 |
| CDA  | Cell_cycle                           | PAAD | 0.267908602  |
| CDA  | Chandran_metastasis_top <sup>5</sup> | PAAD | -0.007519192 |
| CDA  | Citrate cycle (tca cycle)            | PAAD | -0.126698631 |
| CDA  | Cysteine and methionine r            | PAAD | -0.088964525 |
| CDA  | Cytokine induced killer cε           | PAAD | -0.21885056  |
| CDA  | D-arginine and d-ornithin            | PAAD | -0.044594994 |
| CDA  | D-glutamine and d-glutan             | PAAD | -0.189136232 |

|     |                              |      |              |
|-----|------------------------------|------|--------------|
| CDA | Dendritic cell               | PAAD | 0.140244574  |
| CDA | Dna_repair                   | PAAD | 0.113368171  |
| CDA | Dna_replication              | PAAD | 0.06136313   |
| CDA | Double-negative memory       | PAAD | 0.035043972  |
| CDA | Drug metabolism - cytoch     | PAAD | 0.085532357  |
| CDA | Drug metabolism - other      | PAAD | 0.254306495  |
| CDA | E2f_targets                  | PAAD | 0.139280326  |
| CDA | Ecm_receptor_interaction     | PAAD | 0.358334752  |
| CDA | Effector cd4+ memory t       | PAAD | 0.024080331  |
| CDA | Effector cd8+ memory t       | PAAD | 0.167333298  |
| CDA | Effector memory t cell       | PAAD | 0.00656489   |
| CDA | Effector regulatory t (treg) | PAAD | 0.087814071  |
| CDA | Elvidge_hif1a_targets_up     | PAAD | -0.126331268 |
| CDA | Endothelial cell             | PAAD | 0.183433849  |
| CDA | Eosinophil                   | PAAD | 0.164968552  |
| CDA | Ether lipid metabolism       | PAAD | 0.154231373  |
| CDA | Exhausted cd4+ t cell        | PAAD | 0.277676671  |
| CDA | Exhausted cd8+ t cell        | PAAD | 0.288684174  |
| CDA | Exhausted t cell             | PAAD | 0.01772223   |
| CDA | Fat cell (adipocyte)         | PAAD | -0.161520113 |
| CDA | Fatty acid biosynthesis      | PAAD | -0.211336483 |
| CDA | Fatty acid degradation       | PAAD | -0.403481595 |
| CDA | Fatty acid elongation        | PAAD | 0.022299326  |
| CDA | Fibroblast                   | PAAD | 0.251618235  |
| CDA | Folate biosynthesis          | PAAD | -0.008704318 |
| CDA | Follicular b cell            | PAAD | 0.039932377  |
| CDA | Follicular dendritic cell    | PAAD | 0.025364334  |
| CDA | Follicular helper (tfh) t ce | PAAD | 0.124994039  |
| CDA | Follicular t cell            | PAAD | 0.048337135  |
| CDA | Foxp3+il-17+ t cell          | PAAD | 0.045675621  |
| CDA | Fructose and mannose me      | PAAD | 0.217767246  |
| CDA | G2m_checkpoint               | PAAD | 0.186468104  |
| CDA | Galactose metabolism         | PAAD | 0.349901122  |
| CDA | Galie_tumor_stemness_ge      | PAAD | 0.324041713  |
| CDA | Glutathione metabolism       | PAAD | 0.141706063  |
| CDA | Glycerolipid metabolism      | PAAD | 0.058311185  |
| CDA | Glycerophospholipid met      | PAAD | 0.136188688  |
| CDA | Glycine, serine and threor   | PAAD | -0.327127455 |
| CDA | Glycolysis / gluconeogene    | PAAD | 0.298969494  |
| CDA | Glycosaminoglycan biosy      | PAAD | 0.288345158  |
| CDA | Glycosaminoglycan biosy      | PAAD | -0.007593322 |
| CDA | Glycosaminoglycan biosy      | PAAD | 0.404523708  |
| CDA | Glycosaminoglycan degra      | PAAD | -0.040407168 |



|     |                           |      |              |
|-----|---------------------------|------|--------------|
| CDA | Glycosphingolipid biosyn  | PAAD | -0.038293022 |
| CDA | Glycosphingolipid biosyn  | PAAD | 0.250548416  |
| CDA | Glycosphingolipid biosyn  | PAAD | 0.437592629  |
| CDA | Glycosylphosphatidylinos  | PAAD | -0.309406076 |
| CDA | Glyoxylate and dicarboxy  | PAAD | -0.291100472 |
| CDA | Granulocyte               | PAAD | 0.152652387  |
| CDA | Hedgehog_signaling        | PAAD | 0.135232705  |
| CDA | Histidine metabolism      | PAAD | -0.045747696 |
| CDA | Hypoxia                   | PAAD | 0.513281428  |
| CDA | Il-17alpha t cell         | PAAD | -0.011401193 |
| CDA | Il2_stat5_signaling       | PAAD | 0.322858573  |
| CDA | Il6_jak_stat3_signaling   | PAAD | 0.282368029  |
| CDA | Immune_checkpoints_tun    | PAAD | 0.370359319  |
| CDA | Immune_inhibition_cytok   | PAAD | 0.199891694  |
| CDA | Inositol phosphate metabo | PAAD | -0.152308894 |
| CDA | Interleukin_6_signaling   | PAAD | -0.058861235 |
| CDA | Jaeger_metastasis_up      | PAAD | 0.424087665  |
| CDA | Jain_nfkb_signaling       | PAAD | -0.012030965 |
| CDA | Kras_signaling_up         | PAAD | 0.32115931   |
| CDA | Linoleic acid metabolism  | PAAD | 0.034501979  |
| CDA | Lipoic acid metabolism    | PAAD | -0.368037131 |
| CDA | Lysine degradation        | PAAD | -0.387532442 |
| CDA | Lysosome                  | PAAD | 0.036593897  |
| CDA | M1 macrophage             | PAAD | 0.184745349  |
| CDA | M2 macrophage             | PAAD | 0.140556307  |
| CDA | Mannose type o-glycan bi  | PAAD | -0.255066238 |
| CDA | Mapk_signaling_pathway    | PAAD | 0.215765039  |
| CDA | Mapk3_erk1_activation     | PAAD | 0.024762899  |
| CDA | Marginal zone b cell      | PAAD | 0.052026281  |
| CDA | Memory b cell             | PAAD | -0.010330818 |
| CDA | Mesenchymal cell          | PAAD | 0.357899208  |
| CDA | Mesenchymal stem cell     | PAAD | 0.244656302  |
| CDA | Metabolism of xenobiotic  | PAAD | 0.144619757  |
| CDA | Migrating cancer stem cel | PAAD | 0.358252766  |
| CDA | Mitotic_spindle           | PAAD | 0.306058328  |
| CDA | Monocyte                  | PAAD | 0.326924218  |
| CDA | Mtor_signaling_pathway    | PAAD | -0.047776377 |
| CDA | Mtorc1_signaling          | PAAD | 0.309010812  |
| CDA | Mucin type o-glycan biosy | PAAD | 0.267130929  |
| CDA | Myc_targets_v1            | PAAD | 0.14270463   |
| CDA | Myeloid cell              | PAAD | 0.132518211  |
| CDA | N-glycan biosynthesis     | PAAD | -0.054034722 |
| CDA | Naive b cell              | PAAD | 0.064840908  |

|     |                             |      |              |
|-----|-----------------------------|------|--------------|
| CDA | Naive cd4+ t cell           | PAAD | -0.054644997 |
| CDA | Naive cd8+ t cell           | PAAD | -0.120310147 |
| CDA | Natural killer cell         | PAAD | 0.045765452  |
| CDA | Natural killer t (nkt) cell | PAAD | 0.190317638  |
| CDA | Natural regulatory t (treg) | PAAD | 0.119371664  |
| CDA | Neomycin, kanamycin and     | PAAD | 0.443161694  |
| CDA | Neutrophil                  | PAAD | 0.391724987  |
| CDA | Nicotinate and nicotinami   | PAAD | -0.062342656 |
| CDA | Nitrogen metabolism         | PAAD | 0.075711907  |
| CDA | Nod_like_receptor_signal    | PAAD | 0.217160729  |
| CDA | Notch_signaling             | PAAD | 0.413578917  |
| CDA | One carbon pool by folate   | PAAD | -0.09620036  |
| CDA | Other glycan degradation    | PAAD | -0.224122758 |
| CDA | Other types of o-glycan b   | PAAD | 0.084623388  |
| CDA | Oxidative phosphorylatio    | PAAD | -0.008775457 |
| CDA | P53_pathway                 | PAAD | 0.388694021  |
| CDA | P53_signaling_pathway       | PAAD | 0.384466903  |
| CDA | Pantothenate and coa bios   | PAAD | -0.224875244 |
| CDA | Pentose and glucuronate i   | PAAD | 0.083338145  |
| CDA | Pentose phosphate pathwa    | PAAD | 0.295996674  |
| CDA | Pericyte                    | PAAD | 0.106637943  |
| CDA | Phenylalanine metabolism    | PAAD | 0.077883283  |
| CDA | Phenylalanine, tyrosine ar  | PAAD | -0.112967416 |
| CDA | Phosphonate and phosphir    | PAAD | 0.164133914  |
| CDA | Pi3k_akt_activation         | PAAD | 0.234701773  |
| CDA | Pi3k_akt_mtor_signaling     | PAAD | 0.329891812  |
| CDA | Porphyrin and chlorophyl    | PAAD | 0.025019446  |
| CDA | Primary bile acid biosynt   | PAAD | -0.25943022  |
| CDA | Propanoate metabolism       | PAAD | -0.419888682 |
| CDA | Purine metabolism           | PAAD | -0.013453215 |
| CDA | Pyrimidine metabolism       | PAAD | 0.119099115  |
| CDA | Pyruvate metabolism         | PAAD | -0.271840932 |
| CDA | Regulation_of_autophagy     | PAAD | -0.25512246  |
| CDA | Retinol metabolism          | PAAD | 0.076076796  |
| CDA | Riboflavin metabolism       | PAAD | -0.015211845 |
| CDA | Schmahl_pdgf_signaling      | PAAD | 0.247249807  |
| CDA | Selenocompound metabol      | PAAD | -0.356228404 |
| CDA | Signaling_by_hippo          | PAAD | 0.125847295  |
| CDA | Sphingolipid metabolism     | PAAD | -0.157876375 |
| CDA | Starch and sucrose metab    | PAAD | 0.203859579  |
| CDA | Steroid biosynthesis        | PAAD | 0.044255158  |
| CDA | Steroid hormone biosynth    | PAAD | 0.193071896  |
| CDA | Sulfur metabolism           | PAAD | 0.042239946  |

|      |                            |      |              |
|------|----------------------------|------|--------------|
| CDA  | Synthesis and degradation  | PAAD | -0.276558162 |
| CDA  | T helper cell              | PAAD | 0.0214609    |
| CDA  | T helper1 (th1) cell       | PAAD | 0.139518666  |
| CDA  | T helper17 (th17) cell     | PAAD | 0.137410627  |
| CDA  | T helper2 (th2) cell       | PAAD | 0.118463147  |
| CDA  | T helper9 (th9) cell       | PAAD | 0.113706053  |
| CDA  | Taurine and hypotaurine r  | PAAD | -0.068943691 |
| CDA  | Terpenoid backbone biosy   | PAAD | -0.048310473 |
| CDA  | Tgf_beta_signaling_pathw   | PAAD | 0.206978859  |
| CDA  | Thiamine metabolism        | PAAD | 0.160580065  |
| CDA  | Tnfa_signaling_via_nfkb    | PAAD | 0.397299388  |
| CDA  | Tryptophan metabolism      | PAAD | -0.330563491 |
| CDA  | Tumor endothelial cell     | PAAD | 0.394793274  |
| CDA  | Tyrosine metabolism        | PAAD | -0.003578636 |
| CDA  | Ubiquinone and other ter   | PAAD | -0.117322415 |
| CDA  | Valine, leucine and isoleu | PAAD | 0.06314287   |
| CDA  | Valine, leucine and isoleu | PAAD | -0.418926703 |
| CDA  | Vascular endothelial cell  | PAAD | 0.045596354  |
| CDA  | Vascular smooth muscle c   | PAAD | 0.196452033  |
| CDA  | Vegf_signaling_pathway     | PAAD | 0.424804039  |
| CDA  | Vitamin b6 metabolism      | PAAD | -0.270570603 |
| CDA  | Willert_wnt_signaling      | PAAD | 0.364456302  |
| CDA  | Wnt_beta_catenin_signali   | PAAD | 0.107469646  |
| UCK1 | Abnormal plasma cell       | PAAD | 0.291658056  |
| UCK1 | Activated b cell           | PAAD | -0.098049096 |
| UCK1 | Activated cd4+ t cell      | PAAD | -0.209376443 |
| UCK1 | Activated t cell           | PAAD | -0.205121176 |
| UCK1 | Alanine, aspartate and glu | PAAD | 0.031057883  |
| UCK1 | Alcala_apoptosis           | PAAD | -0.128632939 |
| UCK1 | Alpha-linolenic acid meta  | PAAD | -0.295854692 |
| UCK1 | Amino sugar and nucleoti   | PAAD | -0.24013284  |
| UCK1 | Ampk_pathway               | PAAD | -0.003968124 |
| UCK1 | Angiogenesis               | PAAD | -0.268163656 |
| UCK1 | Arachidonic acid metaboli  | PAAD | -0.384744153 |
| UCK1 | Arginine and proline metæ  | PAAD | -0.028432634 |
| UCK1 | Arginine biosynthesis      | PAAD | -0.11400424  |
| UCK1 | Ascorbate and aldarate mε  | PAAD | -0.35947548  |
| UCK1 | Atypical memory b cell     | PAAD | -0.082856971 |
| UCK1 | Axl+siglec6+ dendritic ce  | PAAD | -0.338930398 |
| UCK1 | B cell                     | PAAD | -0.238329425 |
| UCK1 | B1 cell                    | PAAD | -0.062891222 |
| UCK1 | Basal cell                 | PAAD | -0.459707991 |
| UCK1 | Beta-alanine metabolism    | PAAD | -0.079261584 |

|      |                             |      |              |
|------|-----------------------------|------|--------------|
| UCK1 | Biosynthesis of unsaturate  | PAAD | -0.038342778 |
| UCK1 | Biotin metabolism           | PAAD | 0.164768052  |
| UCK1 | Butanoate metabolism        | PAAD | 0.16623687   |
| UCK1 | Caffeine metabolism         | PAAD | -0.308661686 |
| UCK1 | Cancer stem cell            | PAAD | -0.452459944 |
| UCK1 | Cancer stem-like cell       | PAAD | -0.399979831 |
| UCK1 | Cd4+ cytotoxic t cell       | PAAD | -0.186133787 |
| UCK1 | Cd4+ memory t cell          | PAAD | -0.100603538 |
| UCK1 | Cd4+ regulatory t cell      | PAAD | -0.189204476 |
| UCK1 | Cd4+ t helper cell          | PAAD | -0.126688363 |
| UCK1 | Cd4+cd25+ regulatory t c    | PAAD | -0.143163066 |
| UCK1 | Cd8+ cytotoxic t cell       | PAAD | -0.072613841 |
| UCK1 | Cd8+ regulatory t cell      | PAAD | -0.023780723 |
| UCK1 | Cell_cycle                  | PAAD | -0.204708518 |
| UCK1 | Chandran_metastasis_top5    | PAAD | -0.326956732 |
| UCK1 | Citrate cycle (tca cycle)   | PAAD | 0.103207293  |
| UCK1 | Cysteine and methionine r   | PAAD | -0.12451276  |
| UCK1 | Cytokine induced killer cε  | PAAD | 0.246986522  |
| UCK1 | D-arginine and d-ornithin   | PAAD | 0.061884274  |
| UCK1 | D-glutamine and d-glutan    | PAAD | -0.009376582 |
| UCK1 | Dendritic cell              | PAAD | -0.224055213 |
| UCK1 | Dna_repair                  | PAAD | 0.194255991  |
| UCK1 | Dna_replication             | PAAD | 0.020534689  |
| UCK1 | Double-negative memory      | PAAD | -0.039074127 |
| UCK1 | Drug metabolism - cytoch    | PAAD | -0.370114088 |
| UCK1 | Drug metabolism - other (   | PAAD | -0.239406976 |
| UCK1 | E2f_targets                 | PAAD | -0.139344333 |
| UCK1 | Ecm_receptor_interaction    | PAAD | -0.40697741  |
| UCK1 | Effector cd4+ memory t (    | PAAD | -0.133502553 |
| UCK1 | Effector cd8+ memory t (    | PAAD | -0.205793704 |
| UCK1 | Effector memory t cell      | PAAD | -0.128003507 |
| UCK1 | Effector regulatory t (treg | PAAD | -0.165646175 |
| UCK1 | Elvidge_hif1a_targets_up    | PAAD | -0.144720292 |
| UCK1 | Endothelial cell            | PAAD | -0.244101473 |
| UCK1 | Eosinophil                  | PAAD | -0.251153605 |
| UCK1 | Ether lipid metabolism      | PAAD | -0.454656899 |
| UCK1 | Exhausted cd4+ t cell       | PAAD | -0.363888494 |
| UCK1 | Exhausted cd8+ t cell       | PAAD | -0.414716696 |
| UCK1 | Exhausted t cell            | PAAD | -0.078332125 |
| UCK1 | Fat cell (adipocyte)        | PAAD | 0.106905289  |
| UCK1 | Fatty acid biosynthesis     | PAAD | 0.060563222  |
| UCK1 | Fatty acid degradation      | PAAD | 0.123927284  |
| UCK1 | Fatty acid elongation       | PAAD | 0.115582285  |

|      |                              |      |              |
|------|------------------------------|------|--------------|
| UCK1 | Fibroblast                   | PAAD | -0.215913348 |
| UCK1 | Folate biosynthesis          | PAAD | 0.233177524  |
| UCK1 | Follicular b cell            | PAAD | -0.139885291 |
| UCK1 | Follicular dendritic cell    | PAAD | -0.095871835 |
| UCK1 | Follicular helper (tfh) t ce | PAAD | -0.192338932 |
| UCK1 | Follicular t cell            | PAAD | -0.006202423 |
| UCK1 | Foxp3+il-17+ t cell          | PAAD | -0.186100378 |
| UCK1 | Fructose and mannose me      | PAAD | -0.184943638 |
| UCK1 | G2m_checkpoint               | PAAD | -0.296276094 |
| UCK1 | Galactose metabolism         | PAAD | -0.2190159   |
| UCK1 | Galie_tumor_stemness_ge      | PAAD | -0.373114785 |
| UCK1 | Glutathione metabolism       | PAAD | -0.145880016 |
| UCK1 | Glycerolipid metabolism      | PAAD | -0.302983417 |
| UCK1 | Glycerophospholipid metæ     | PAAD | -0.186528899 |
| UCK1 | Glycine, serine and threor   | PAAD | 0.3936336    |
| UCK1 | Glycolysis / gluconeogene    | PAAD | -0.29771643  |
| UCK1 | Glycosaminoglycan biosy1     | PAAD | 0.06975783   |
| UCK1 | Glycosaminoglycan biosy1     | PAAD | 0.140092241  |
| UCK1 | Glycosaminoglycan biosy1     | PAAD | -0.418107862 |
| UCK1 | Glycosaminoglycan degra      | PAAD | 0.12440889   |
| UCK1 | Glycosphingolipid biosyn1    | PAAD | 0.276409626  |
| UCK1 | Glycosphingolipid biosyn1    | PAAD | -0.15182003  |
| UCK1 | Glycosphingolipid biosyn1    | PAAD | -0.441888923 |
| UCK1 | Glycosylphosphatidylinos:    | PAAD | 0.346145272  |
| UCK1 | Glyoxylate and dicarboxy     | PAAD | 0.286142063  |
| UCK1 | Granulocyte                  | PAAD | -0.233243226 |
| UCK1 | Hedgehog_signaling           | PAAD | -0.130418755 |
| UCK1 | Histidine metabolism         | PAAD | -0.170205634 |
| UCK1 | Hypoxia                      | PAAD | -0.368497868 |
| UCK1 | Il-17ralpha t cell           | PAAD | -0.125569158 |
| UCK1 | Il2_stat5_signaling          | PAAD | -0.436510282 |
| UCK1 | Il6_jak_stat3_signaling      | PAAD | -0.436580445 |
| UCK1 | Immune_checkpoints_tunr      | PAAD | -0.319287766 |
| UCK1 | Immune_inhibition_cytok      | PAAD | -0.256304679 |
| UCK1 | Inositol phosphate metabo    | PAAD | -0.302034265 |
| UCK1 | Interleukin_6_signaling      | PAAD | -0.295338289 |
| UCK1 | Jaeger_metastasis_up         | PAAD | -0.287261686 |
| UCK1 | Jain_nfkb_signaling          | PAAD | -0.06238198  |
| UCK1 | Kras_signaling_up            | PAAD | -0.456229254 |
| UCK1 | Linoleic acid metabolism     | PAAD | -0.366105473 |
| UCK1 | Lipoic acid metabolism       | PAAD | 0.280880634  |
| UCK1 | Lysine degradation           | PAAD | 0.26253402   |
| UCK1 | Lysosome                     | PAAD | 0.084870642  |

|      |                             |      |              |
|------|-----------------------------|------|--------------|
| UCK1 | M1 macrophage               | PAAD | -0.278755763 |
| UCK1 | M2 macrophage               | PAAD | -0.125287052 |
| UCK1 | Mannose type o-glycan bi    | PAAD | 0.513866456  |
| UCK1 | Mapk_signaling_pathway      | PAAD | -0.376295358 |
| UCK1 | Mapk3_erk1_activation       | PAAD | -0.390937888 |
| UCK1 | Marginal zone b cell        | PAAD | -0.160511226 |
| UCK1 | Memory b cell               | PAAD | -0.135396741 |
| UCK1 | Mesenchymal cell            | PAAD | -0.200287027 |
| UCK1 | Mesenchymal stem cell       | PAAD | -0.309615    |
| UCK1 | Metabolism of xenobiotic    | PAAD | -0.330518831 |
| UCK1 | Migrating cancer stem cel   | PAAD | -0.385383031 |
| UCK1 | Mitotic_spindle             | PAAD | -0.490559974 |
| UCK1 | Monocyte                    | PAAD | -0.386252315 |
| UCK1 | Mtor_signaling_pathway      | PAAD | 0.021341546  |
| UCK1 | Mtorc1_signaling            | PAAD | -0.33661393  |
| UCK1 | Mucin type o-glycan biosy   | PAAD | -0.694234912 |
| UCK1 | Myc_targets_v1              | PAAD | -0.05388154  |
| UCK1 | Myeloid cell                | PAAD | -0.230588348 |
| UCK1 | N-glycan biosynthesis       | PAAD | 0.086031536  |
| UCK1 | Naive b cell                | PAAD | -0.163965855 |
| UCK1 | Naive cd4+ t cell           | PAAD | -0.142417551 |
| UCK1 | Naive cd8+ t cell           | PAAD | -0.002985609 |
| UCK1 | Natural killer cell         | PAAD | -0.128919899 |
| UCK1 | Natural killer t (nkt) cell | PAAD | -0.316510759 |
| UCK1 | Natural regulatory t (treg) | PAAD | -0.233234809 |
| UCK1 | Neomycin, kanamycin and     | PAAD | -0.468866203 |
| UCK1 | Neutrophil                  | PAAD | -0.460643504 |
| UCK1 | Nicotinate and nicotinami   | PAAD | -0.108678843 |
| UCK1 | Nitrogen metabolism         | PAAD | -0.302102104 |
| UCK1 | Nod_like_receptor_signal    | PAAD | -0.439813012 |
| UCK1 | Notch_signaling             | PAAD | -0.508816705 |
| UCK1 | One carbon pool by folate   | PAAD | -0.226903698 |
| UCK1 | Other glycan degradation    | PAAD | 0.244340699  |
| UCK1 | Other types of o-glycan b   | PAAD | 0.252376687  |
| UCK1 | Oxidative phosphorylatio    | PAAD | 0.305235462  |
| UCK1 | P53_pathway                 | PAAD | -0.362335861 |
| UCK1 | P53_signaling_pathway       | PAAD | -0.557357238 |
| UCK1 | Pantothenate and coa bios   | PAAD | 0.22946486   |
| UCK1 | Pentose and glucuronate i   | PAAD | -0.389826671 |
| UCK1 | Pentose phosphate pathwa    | PAAD | -0.200274273 |
| UCK1 | Pericyte                    | PAAD | -0.040889344 |
| UCK1 | Phenylalanine metabolism    | PAAD | -0.089894888 |
| UCK1 | Phenylalanine, tyrosine ar  | PAAD | 0.210483632  |

|      |                            |      |              |
|------|----------------------------|------|--------------|
| UCK1 | Phosphonate and phosphir   | PAAD | -0.217657081 |
| UCK1 | Pi3k_akt_activation        | PAAD | -0.274556749 |
| UCK1 | Pi3k_akt_mtor_signaling    | PAAD | -0.294674154 |
| UCK1 | Porphyrin and chlorophyl   | PAAD | -0.152670334 |
| UCK1 | Primary bile acid biosynt  | PAAD | 0.263083501  |
| UCK1 | Propanoate metabolism      | PAAD | 0.123674184  |
| UCK1 | Purine metabolism          | PAAD | -0.032440835 |
| UCK1 | Pyrimidine metabolism      | PAAD | 0.032767774  |
| UCK1 | Pyruvate metabolism        | PAAD | 0.158478114  |
| UCK1 | Regulation_of_autophagy    | PAAD | 0.29630838   |
| UCK1 | Retinol metabolism         | PAAD | -0.307084136 |
| UCK1 | Riboflavin metabolism      | PAAD | -0.012098335 |
| UCK1 | Schmahl_pdgf_signaling     | PAAD | -0.429608535 |
| UCK1 | Selenocompound metabol     | PAAD | -0.084039117 |
| UCK1 | Signaling_by_hippo         | PAAD | -0.338101457 |
| UCK1 | Sphingolipid metabolism    | PAAD | -0.102886073 |
| UCK1 | Starch and sucrose metab   | PAAD | -0.148533105 |
| UCK1 | Steroid biosynthesis       | PAAD | -0.1628077   |
| UCK1 | Steroid hormone biosynth   | PAAD | -0.461892748 |
| UCK1 | Sulfur metabolism          | PAAD | -0.305798357 |
| UCK1 | Synthesis and degradation  | PAAD | 0.068473147  |
| UCK1 | T helper cell              | PAAD | -0.127762017 |
| UCK1 | T helper1 (th1) cell       | PAAD | -0.246000606 |
| UCK1 | T helper17 (th17) cell     | PAAD | -0.339557175 |
| UCK1 | T helper2 (th2) cell       | PAAD | -0.240827292 |
| UCK1 | T helper9 (th9) cell       | PAAD | -0.175705129 |
| UCK1 | Taurine and hypotaurine r  | PAAD | -0.086105759 |
| UCK1 | Terpenoid backbone biosy   | PAAD | -0.042096079 |
| UCK1 | Tgf_beta_signaling_pathw   | PAAD | -0.402250078 |
| UCK1 | Thiamine metabolism        | PAAD | 0.098964554  |
| UCK1 | Tnfa_signaling_via_nfb     | PAAD | -0.558999376 |
| UCK1 | Tryptophan metabolism      | PAAD | 0.130476479  |
| UCK1 | Tumor endothelial cell     | PAAD | -0.146002973 |
| UCK1 | Tyrosine metabolism        | PAAD | 0.050881642  |
| UCK1 | Ubiquinone and other ter   | PAAD | 0.252624596  |
| UCK1 | Valine, leucine and isoleu | PAAD | 0.111978554  |
| UCK1 | Valine, leucine and isoleu | PAAD | 0.262166277  |
| UCK1 | Vascular endothelial cell  | PAAD | -0.057349183 |
| UCK1 | Vascular smooth muscle c   | PAAD | -0.204456211 |
| UCK1 | Vegf_signaling_pathway     | PAAD | -0.370803398 |
| UCK1 | Vitamin b6 metabolism      | PAAD | 0.442950345  |
| UCK1 | Willert_wnt_signaling      | PAAD | -0.259804907 |
| UCK1 | Wnt_beta_catenin_signali   | PAAD | -0.037266589 |

|      |                            |      |              |
|------|----------------------------|------|--------------|
| UCK2 | Abnormal plasma cell       | PAAD | -0.364656546 |
| UCK2 | Activated b cell           | PAAD | -0.138737212 |
| UCK2 | Activated cd4+ t cell      | PAAD | -0.136672118 |
| UCK2 | Activated t cell           | PAAD | -0.076036764 |
| UCK2 | Alanine, aspartate and glu | PAAD | 0.202458965  |
| UCK2 | Alcala_apoptosis           | PAAD | 0.482652071  |
| UCK2 | Alpha-linolenic acid meta  | PAAD | 0.249844506  |
| UCK2 | Amino sugar and nucleoti   | PAAD | 0.477027513  |
| UCK2 | Ampk_pathway               | PAAD | 0.164169178  |
| UCK2 | Angiogenesis               | PAAD | -0.012654223 |
| UCK2 | Arachidonic acid metabol   | PAAD | 0.260062099  |
| UCK2 | Arginine and proline met   | PAAD | 0.407501274  |
| UCK2 | Arginine biosynthesis      | PAAD | 0.132950829  |
| UCK2 | Ascorbate and aldarate m   | PAAD | 0.228265159  |
| UCK2 | Atypical memory b cell     | PAAD | -0.10383039  |
| UCK2 | Axl+siglec6+ dendritic ce  | PAAD | -0.016572843 |
| UCK2 | B cell                     | PAAD | -0.082967576 |
| UCK2 | B1 cell                    | PAAD | -0.167417723 |
| UCK2 | Basal cell                 | PAAD | 0.445255653  |
| UCK2 | Beta-alanine metabolism    | PAAD | 0.086533555  |
| UCK2 | Biosynthesis of unsaturate | PAAD | 0.191319357  |
| UCK2 | Biotin metabolism          | PAAD | -0.043409388 |
| UCK2 | Butanoate metabolism       | PAAD | 0.036094549  |
| UCK2 | Caffeine metabolism        | PAAD | 0.277112692  |
| UCK2 | Cancer stem cell           | PAAD | 0.036957093  |
| UCK2 | Cancer stem-like cell      | PAAD | 0.168963459  |
| UCK2 | Cd4+ cytotoxic t cell      | PAAD | -0.153507481 |
| UCK2 | Cd4+ memory t cell         | PAAD | -0.204241161 |
| UCK2 | Cd4+ regulatory t cell     | PAAD | -0.15682765  |
| UCK2 | Cd4+ t helper cell         | PAAD | -0.242397356 |
| UCK2 | Cd4+cd25+ regulatory t c   | PAAD | -0.220282044 |
| UCK2 | Cd8+ cytotoxic t cell      | PAAD | -0.15813577  |
| UCK2 | Cd8+ regulatory t cell     | PAAD | -0.242892932 |
| UCK2 | Cell_cycle                 | PAAD | 0.369055108  |
| UCK2 | Chandran_metastasis_top    | PAAD | 0.228256287  |
| UCK2 | Citrate cycle (tca cycle)  | PAAD | 0.238172709  |
| UCK2 | Cysteine and methionine r  | PAAD | 0.360112426  |
| UCK2 | Cytokine induced killer c  | PAAD | -0.441423194 |
| UCK2 | D-arginine and d-ornithin  | PAAD | -0.152421316 |
| UCK2 | D-glutamine and d-glutan   | PAAD | -0.296801379 |
| UCK2 | Dendritic cell             | PAAD | -0.131651072 |
| UCK2 | Dna_repair                 | PAAD | 0.403574727  |
| UCK2 | Dna_replication            | PAAD | 0.419786707  |



|      |                                   |              |
|------|-----------------------------------|--------------|
| UCK2 | Double-negative memory PAAD       | -0.127645448 |
| UCK2 | Drug metabolism - cytoch PAAD     | 0.222261827  |
| UCK2 | Drug metabolism - other ( PAAD    | 0.548961775  |
| UCK2 | E2f_targets PAAD                  | 0.420720345  |
| UCK2 | Ecm_receptor_interaction PAAD     | 0.003659076  |
| UCK2 | Effector cd4+ memory t ( PAAD     | -0.281947807 |
| UCK2 | Effector cd8+ memory t ( PAAD     | -0.183880941 |
| UCK2 | Effector memory t cell PAAD       | -0.238429322 |
| UCK2 | Effector regulatory t (treg PAAD  | -0.236221724 |
| UCK2 | Elvidge_hif1a_targets_up PAAD     | 0.242452877  |
| UCK2 | Endothelial cell PAAD             | -0.105437118 |
| UCK2 | Eosinophil PAAD                   | -0.066120557 |
| UCK2 | Ether lipid metabolism PAAD       | 0.142029497  |
| UCK2 | Exhausted cd4+ t cell PAAD        | -0.069584766 |
| UCK2 | Exhausted cd8+ t cell PAAD        | 0.045399916  |
| UCK2 | Exhausted t cell PAAD             | -0.1938541   |
| UCK2 | Fat cell (adipocyte) PAAD         | -0.101768259 |
| UCK2 | Fatty acid biosynthesis PAAD      | 0.094862148  |
| UCK2 | Fatty acid degradation PAAD       | -0.032447365 |
| UCK2 | Fatty acid elongation PAAD        | 0.248218295  |
| UCK2 | Fibroblast PAAD                   | -0.168363268 |
| UCK2 | Folate biosynthesis PAAD          | 0.109177991  |
| UCK2 | Follicular b cell PAAD            | -0.165953695 |
| UCK2 | Follicular dendritic cell PAAD    | -0.200150016 |
| UCK2 | Follicular helper (tfh) t ce PAAD | -0.129114466 |
| UCK2 | Follicular t cell PAAD            | -0.086888617 |
| UCK2 | Foxp3+il-17+ t cell PAAD          | -0.12786612  |
| UCK2 | Fructose and mannose me PAAD      | 0.452758073  |
| UCK2 | G2m_checkpoint PAAD               | 0.41872806   |
| UCK2 | Galactose metabolism PAAD         | 0.312161757  |
| UCK2 | Galie_tumor_stemness_ge PAAD      | -0.078869022 |
| UCK2 | Glutathione metabolism PAAD       | 0.448470108  |
| UCK2 | Glycerolipid metabolism PAAD      | 0.244369515  |
| UCK2 | Glycerophospholipid metæ PAAD     | 0.223834917  |
| UCK2 | Glycine, serine and threor PAAD   | -0.092229927 |
| UCK2 | Glycolysis / gluconeogene PAAD    | 0.455535921  |
| UCK2 | Glycosaminoglycan biosy1 PAAD     | -0.069500764 |
| UCK2 | Glycosaminoglycan biosy1 PAAD     | -0.336015329 |
| UCK2 | Glycosaminoglycan biosy1 PAAD     | 0.339132397  |
| UCK2 | Glycosaminoglycan degra PAAD      | -0.040712974 |
| UCK2 | Glycosphingolipid biosyn1 PAAD    | -0.325126285 |
| UCK2 | Glycosphingolipid biosyn1 PAAD    | -0.026162    |
| UCK2 | Glycosphingolipid biosyn1 PAAD    | 0.352822906  |

|      |                                    |      |              |
|------|------------------------------------|------|--------------|
| UCK2 | Glycosylphosphatidylinositol       | PAAD | 0.037107891  |
| UCK2 | Glyoxylate and dicarboxylate       | PAAD | 0.21584459   |
| UCK2 | Granulocyte                        | PAAD | -0.08861276  |
| UCK2 | Hedgehog signaling                 | PAAD | -0.335348892 |
| UCK2 | Histidine metabolism               | PAAD | 0.15412835   |
| UCK2 | Hypoxia                            | PAAD | 0.23108456   |
| UCK2 | Il-17alpha t cell                  | PAAD | -0.209393788 |
| UCK2 | Il2_stat5_signaling                | PAAD | 0.083922514  |
| UCK2 | Il6_jak_stat3_signaling            | PAAD | 0.015115912  |
| UCK2 | Immune_checkpoints_tumor           | PAAD | 0.055878744  |
| UCK2 | Immune_inhibition_cytokine         | PAAD | 0.07190589   |
| UCK2 | Inositol phosphate metabolism      | PAAD | -0.285586222 |
| UCK2 | Interleukin_6_signaling            | PAAD | -0.264755404 |
| UCK2 | Jaeger_metastasis_up               | PAAD | 0.312789149  |
| UCK2 | Jain_nfkb_signaling                | PAAD | 0.434374445  |
| UCK2 | Kras_signaling_up                  | PAAD | -0.002225883 |
| UCK2 | Linoleic acid metabolism           | PAAD | 0.239892362  |
| UCK2 | Lipoic acid metabolism             | PAAD | 0.019027219  |
| UCK2 | Lysine degradation                 | PAAD | -0.080143051 |
| UCK2 | Lysosome                           | PAAD | -0.131724886 |
| UCK2 | M1 macrophage                      | PAAD | -0.041346236 |
| UCK2 | M2 macrophage                      | PAAD | -0.172961777 |
| UCK2 | Mannose type o-glycan biosynthesis | PAAD | -0.186914679 |
| UCK2 | Mapk_signaling_pathway             | PAAD | -0.128223935 |
| UCK2 | Mapk3_erk1_activation              | PAAD | -0.156225288 |
| UCK2 | Marginal zone b cell               | PAAD | -0.144705425 |
| UCK2 | Memory b cell                      | PAAD | -0.137812048 |
| UCK2 | Mesenchymal cell                   | PAAD | -0.00380625  |
| UCK2 | Mesenchymal stem cell              | PAAD | -0.091893832 |
| UCK2 | Metabolism of xenobiotics          | PAAD | 0.317615221  |
| UCK2 | Migrating cancer stem cell         | PAAD | 0.385031411  |
| UCK2 | Mitotic_spindle                    | PAAD | 0.131735944  |
| UCK2 | Monocyte                           | PAAD | 0.097310233  |
| UCK2 | Mtor_signaling_pathway             | PAAD | -0.28636167  |
| UCK2 | Mtorc1_signaling                   | PAAD | 0.582240396  |
| UCK2 | Mucin type o-glycan biosynthesis   | PAAD | 0.277176961  |
| UCK2 | Myc_targets_v1                     | PAAD | 0.546621018  |
| UCK2 | Myeloid cell                       | PAAD | -0.167570838 |
| UCK2 | N-glycan biosynthesis              | PAAD | 0.208245999  |
| UCK2 | Naive b cell                       | PAAD | -0.050817453 |
| UCK2 | Naive cd4+ t cell                  | PAAD | -0.269713026 |
| UCK2 | Naive cd8+ t cell                  | PAAD | -0.403437264 |
| UCK2 | Natural killer cell                | PAAD | -0.211108496 |

|      |                             |      |              |
|------|-----------------------------|------|--------------|
| UCK2 | Natural killer t (nkt) cell | PAAD | 0.262622652  |
| UCK2 | Natural regulatory t (treg) | PAAD | -0.198676155 |
| UCK2 | Neomycin, kanamycin and     | PAAD | 0.309576852  |
| UCK2 | Neutrophil                  | PAAD | 0.209629897  |
| UCK2 | Nicotinate and nicotinami   | PAAD | -0.042512786 |
| UCK2 | Nitrogen metabolism         | PAAD | 0.223933695  |
| UCK2 | Nod_like_receptor_signal    | PAAD | 0.064637726  |
| UCK2 | Notch_signaling             | PAAD | 0.414417241  |
| UCK2 | One carbon pool by folate   | PAAD | 0.467612238  |
| UCK2 | Other glycan degradation    | PAAD | -0.069345553 |
| UCK2 | Other types of o-glycan b   | PAAD | -0.10098712  |
| UCK2 | Oxidative phosphorylatio    | PAAD | 0.335728876  |
| UCK2 | P53_pathway                 | PAAD | 0.436759164  |
| UCK2 | P53_signaling_pathway       | PAAD | 0.480981802  |
| UCK2 | Pantothenate and coa bios   | PAAD | -0.065492562 |
| UCK2 | Pentose and glucuronate i   | PAAD | 0.309782401  |
| UCK2 | Pentose phosphate pathwa    | PAAD | 0.456295608  |
| UCK2 | Pericyte                    | PAAD | -0.225751818 |
| UCK2 | Phenylalanine metabolism    | PAAD | 0.174055014  |
| UCK2 | Phenylalanine, tyrosine ar  | PAAD | -0.021731803 |
| UCK2 | Phosphonate and phosphir    | PAAD | 0.177348927  |
| UCK2 | Pi3k_akt_activation         | PAAD | -0.144024587 |
| UCK2 | Pi3k_akt_mtor_signaling     | PAAD | 0.291446964  |
| UCK2 | Porphyrin and chlorophyl    | PAAD | 0.381557051  |
| UCK2 | Primary bile acid biosynt   | PAAD | -0.288067482 |
| UCK2 | Propanoate metabolism       | PAAD | -0.033951827 |
| UCK2 | Purine metabolism           | PAAD | 0.519644417  |
| UCK2 | Pyrimidine metabolism       | PAAD | 0.533973753  |
| UCK2 | Pyruvate metabolism         | PAAD | 0.202167174  |
| UCK2 | Regulation_of_autophagy     | PAAD | -0.019110128 |
| UCK2 | Retinol metabolism          | PAAD | 0.107045608  |
| UCK2 | Riboflavin metabolism       | PAAD | 0.458522909  |
| UCK2 | Schmahl_pdgf_signaling      | PAAD | -0.060359571 |
| UCK2 | Selenocompound metabol      | PAAD | -0.027475522 |
| UCK2 | Signaling_by_hippo          | PAAD | -0.034170283 |
| UCK2 | Sphingolipid metabolism     | PAAD | -0.092221688 |
| UCK2 | Starch and sucrose metabo   | PAAD | 0.036802597  |
| UCK2 | Steroid biosynthesis        | PAAD | 0.399435138  |
| UCK2 | Steroid hormone biosynth    | PAAD | 0.306915132  |
| UCK2 | Sulfur metabolism           | PAAD | 0.295896843  |
| UCK2 | Synthesis and degradation   | PAAD | 0.087595919  |
| UCK2 | T helper cell               | PAAD | -0.249607368 |
| UCK2 | T helper1 (th1) cell        | PAAD | -0.11257141  |

|       |                            |      |              |
|-------|----------------------------|------|--------------|
| UCK2  | T helper17 (th17) cell     | PAAD | -0.012845868 |
| UCK2  | T helper2 (th2) cell       | PAAD | -0.089313202 |
| UCK2  | T helper9 (th9) cell       | PAAD | -0.164782544 |
| UCK2  | Taurine and hypotaurine r  | PAAD | -0.014051294 |
| UCK2  | Terpenoid backbone biosy   | PAAD | 0.437467723  |
| UCK2  | Tgf_beta_signaling_pathw   | PAAD | -0.122646905 |
| UCK2  | Thiamine metabolism        | PAAD | 0.248385851  |
| UCK2  | Tnfa_signaling_via_nfkb    | PAAD | 0.252842604  |
| UCK2  | Tryptophan metabolism      | PAAD | -0.15994067  |
| UCK2  | Tumor endothelial cell     | PAAD | 0.278192813  |
| UCK2  | Tyrosine metabolism        | PAAD | 0.059167451  |
| UCK2  | Ubiquinone and other terf  | PAAD | 0.133143372  |
| UCK2  | Valine, leucine and isoleu | PAAD | 0.133428188  |
| UCK2  | Valine, leucine and isoleu | PAAD | -0.042618464 |
| UCK2  | Vascular endothelial cell  | PAAD | -0.203485553 |
| UCK2  | Vascular smooth muscle c   | PAAD | -0.090249643 |
| UCK2  | Vegf_signaling_pathway     | PAAD | 0.051495427  |
| UCK2  | Vitamin b6 metabolism      | PAAD | -0.111590397 |
| UCK2  | Willert_wnt_signaling      | PAAD | 0.355392179  |
| UCK2  | Wnt_beta_catenin_signali   | PAAD | -0.079424713 |
| UCKL1 | Abnormal plasma cell       | PAAD | -0.272788095 |
| UCKL1 | Activated b cell           | PAAD | -0.337899594 |
| UCKL1 | Activated cd4+ t cell      | PAAD | -0.479537075 |
| UCKL1 | Activated t cell           | PAAD | -0.422811866 |
| UCKL1 | Alanine, aspartate and glu | PAAD | 0.010613852  |
| UCKL1 | Alcala_apoptosis           | PAAD | 0.064970191  |
| UCKL1 | Alpha-linolenic acid meta  | PAAD | -0.11188003  |
| UCKL1 | Amino sugar and nucleoti   | PAAD | -0.054480533 |
| UCKL1 | Ampk_pathway               | PAAD | 0.439027738  |
| UCKL1 | Angiogenesis               | PAAD | -0.420490405 |
| UCKL1 | Arachidonic acid metabol:  | PAAD | -0.243640181 |
| UCKL1 | Arginine and proline metæ  | PAAD | -0.10611337  |
| UCKL1 | Arginine biosynthesis      | PAAD | -0.054017945 |
| UCKL1 | Ascorbate and aldarate mε  | PAAD | -0.195609848 |
| UCKL1 | Atypical memory b cell     | PAAD | -0.252072666 |
| UCKL1 | Axl+siglec6+ dendritic ce  | PAAD | -0.529456384 |
| UCKL1 | B cell                     | PAAD | -0.463905826 |
| UCKL1 | B1 cell                    | PAAD | -0.33835037  |
| UCKL1 | Basal cell                 | PAAD | -0.003136028 |
| UCKL1 | Beta-alanine metabolism    | PAAD | -0.387315265 |
| UCKL1 | Biosynthesis of unsaturate | PAAD | -0.075127416 |
| UCKL1 | Biotin metabolism          | PAAD | 0.026608453  |
| UCKL1 | Butanoate metabolism       | PAAD | -0.028325805 |

|       |                             |      |              |
|-------|-----------------------------|------|--------------|
| UCKL1 | Caffeine metabolism         | PAAD | -0.052725484 |
| UCKL1 | Cancer stem cell            | PAAD | -0.643241965 |
| UCKL1 | Cancer stem-like cell       | PAAD | -0.583877948 |
| UCKL1 | Cd4+ cytotoxic t cell       | PAAD | -0.513716091 |
| UCKL1 | Cd4+ memory t cell          | PAAD | -0.374937531 |
| UCKL1 | Cd4+ regulatory t cell      | PAAD | -0.471202459 |
| UCKL1 | Cd4+ t helper cell          | PAAD | -0.504251711 |
| UCKL1 | Cd4+cd25+ regulatory t c    | PAAD | -0.513739167 |
| UCKL1 | Cd8+ cytotoxic t cell       | PAAD | -0.403281464 |
| UCKL1 | Cd8+ regulatory t cell      | PAAD | -0.430715068 |
| UCKL1 | Cell_cycle                  | PAAD | 0.092151817  |
| UCKL1 | Chandran_metastasis_top5    | PAAD | -0.163942242 |
| UCKL1 | Citrate cycle (tca cycle)   | PAAD | 0.056742568  |
| UCKL1 | Cysteine and methionine r   | PAAD | 0.009297304  |
| UCKL1 | Cytokine induced killer c   | PAAD | -0.291204914 |
| UCKL1 | D-arginine and d-ornithin   | PAAD | -0.189972639 |
| UCKL1 | D-glutamine and d-glutan    | PAAD | -0.158911942 |
| UCKL1 | Dendritic cell              | PAAD | -0.488936145 |
| UCKL1 | Dna_repair                  | PAAD | 0.523746191  |
| UCKL1 | Dna_replication             | PAAD | 0.289061398  |
| UCKL1 | Double-negative memory      | PAAD | -0.196910737 |
| UCKL1 | Drug metabolism - cytoch    | PAAD | -0.306091513 |
| UCKL1 | Drug metabolism - other c   | PAAD | 0.16155309   |
| UCKL1 | E2f_targets                 | PAAD | 0.162764614  |
| UCKL1 | Ecm_receptor_interaction    | PAAD | -0.460449203 |
| UCKL1 | Effector cd4+ memory t (    | PAAD | -0.502936217 |
| UCKL1 | Effector cd8+ memory t (    | PAAD | -0.489129542 |
| UCKL1 | Effector memory t cell      | PAAD | -0.503495792 |
| UCKL1 | Effector regulatory t (treg | PAAD | -0.560137593 |
| UCKL1 | Elvidge_hif1a_targets_up    | PAAD | -0.304886297 |
| UCKL1 | Endothelial cell            | PAAD | -0.609809155 |
| UCKL1 | Eosinophil                  | PAAD | -0.522932563 |
| UCKL1 | Ether lipid metabolism      | PAAD | -0.315576075 |
| UCKL1 | Exhausted cd4+ t cell       | PAAD | -0.537177264 |
| UCKL1 | Exhausted cd8+ t cell       | PAAD | -0.502408914 |
| UCKL1 | Exhausted t cell            | PAAD | -0.401021996 |
| UCKL1 | Fat cell (adipocyte)        | PAAD | -0.118084962 |
| UCKL1 | Fatty acid biosynthesis     | PAAD | -0.025224085 |
| UCKL1 | Fatty acid degradation      | PAAD | -0.20934603  |
| UCKL1 | Fatty acid elongation       | PAAD | -0.013103659 |
| UCKL1 | Fibroblast                  | PAAD | -0.531668424 |
| UCKL1 | Folate biosynthesis         | PAAD | 0.125381331  |
| UCKL1 | Follicular b cell           | PAAD | -0.387337313 |

|       |                                    |      |              |
|-------|------------------------------------|------|--------------|
| UCKL1 | Follicular dendritic cell          | PAAD | -0.317392802 |
| UCKL1 | Follicular helper (tfh) t cell     | PAAD | -0.44435212  |
| UCKL1 | Follicular t cell                  | PAAD | -0.113115266 |
| UCKL1 | Foxp3+il-17+ t cell                | PAAD | -0.319659706 |
| UCKL1 | Fructose and mannose metabolism    | PAAD | 0.260060152  |
| UCKL1 | G2m_checkpoint                     | PAAD | -0.004284959 |
| UCKL1 | Galactose metabolism               | PAAD | -0.044193849 |
| UCKL1 | Galie_tumor_stemness_gene          | PAAD | -0.558694308 |
| UCKL1 | Glutathione metabolism             | PAAD | -0.098603262 |
| UCKL1 | Glycerolipid metabolism            | PAAD | -0.083461312 |
| UCKL1 | Glycerophospholipid metabolism     | PAAD | 0.342711352  |
| UCKL1 | Glycine, serine and threonine      | PAAD | -0.0016505   |
| UCKL1 | Glycolysis / gluconeogenesis       | PAAD | -0.028641263 |
| UCKL1 | Glycosaminoglycan biosynthesis     | PAAD | 0.039724993  |
| UCKL1 | Glycosaminoglycan biosynthesis     | PAAD | -0.22357933  |
| UCKL1 | Glycosaminoglycan biosynthesis     | PAAD | -0.247798623 |
| UCKL1 | Glycosaminoglycan degradation      | PAAD | -0.053842804 |
| UCKL1 | Glycosphingolipid biosynthesis     | PAAD | -0.311617307 |
| UCKL1 | Glycosphingolipid biosynthesis     | PAAD | -0.341133913 |
| UCKL1 | Glycosphingolipid biosynthesis     | PAAD | -0.260753022 |
| UCKL1 | Glycosylphosphatidylinositol       | PAAD | 0.31917478   |
| UCKL1 | Glyoxylate and dicarboxylate       | PAAD | 0.234926363  |
| UCKL1 | Granulocyte                        | PAAD | -0.550029473 |
| UCKL1 | Hedgehog_signaling                 | PAAD | -0.409819482 |
| UCKL1 | Histidine metabolism               | PAAD | -0.39087482  |
| UCKL1 | Hypoxia                            | PAAD | -0.133432137 |
| UCKL1 | Il-17alpha t cell                  | PAAD | -0.476904715 |
| UCKL1 | Il2_stat5_signaling                | PAAD | -0.537532782 |
| UCKL1 | Il6_jak_stat3_signaling            | PAAD | -0.565049378 |
| UCKL1 | Immune_checkpoints_tumor           | PAAD | -0.442113553 |
| UCKL1 | Immune_inhibition_cytokine         | PAAD | -0.372336742 |
| UCKL1 | Inositol phosphate metabolism      | PAAD | -0.45380021  |
| UCKL1 | Interleukin_6_signaling            | PAAD | -0.622129224 |
| UCKL1 | Jaeger_metastasis_up               | PAAD | -0.272029636 |
| UCKL1 | Jain_nfkb_signaling                | PAAD | 0.31881162   |
| UCKL1 | Kras_signaling_up                  | PAAD | -0.608458555 |
| UCKL1 | Linoleic acid metabolism           | PAAD | -0.177886207 |
| UCKL1 | Lipoic acid metabolism             | PAAD | 0.230492688  |
| UCKL1 | Lysine degradation                 | PAAD | -0.085995293 |
| UCKL1 | Lysosome                           | PAAD | -0.11622947  |
| UCKL1 | M1 macrophage                      | PAAD | -0.553389495 |
| UCKL1 | M2 macrophage                      | PAAD | -0.521983802 |
| UCKL1 | Mannose type o-glycan biosynthesis | PAAD | 0.337994809  |

|       |                             |      |              |
|-------|-----------------------------|------|--------------|
| UCKL1 | Mapk_signaling_pathway      | PAAD | -0.484622291 |
| UCKL1 | Mapk3_erk1_activation       | PAAD | -0.541572608 |
| UCKL1 | Marginal zone b cell        | PAAD | -0.470099665 |
| UCKL1 | Memory b cell               | PAAD | -0.38576039  |
| UCKL1 | Mesenchymal cell            | PAAD | -0.39618626  |
| UCKL1 | Mesenchymal stem cell       | PAAD | -0.601062236 |
| UCKL1 | Metabolism of xenobiotic    | PAAD | -0.192355456 |
| UCKL1 | Migrating cancer stem cel   | PAAD | -0.015814095 |
| UCKL1 | Mitotic_spindle             | PAAD | -0.276412405 |
| UCKL1 | Monocyte                    | PAAD | -0.441984639 |
| UCKL1 | Mtor_signaling_pathway      | PAAD | -0.254595473 |
| UCKL1 | Mtorc1_signaling            | PAAD | -0.010104435 |
| UCKL1 | Mucin type o-glycan bios    | PAAD | -0.486452102 |
| UCKL1 | Myc_targets_v1              | PAAD | 0.246475471  |
| UCKL1 | Myeloid cell                | PAAD | -0.572414228 |
| UCKL1 | N-glycan biosynthesis       | PAAD | -0.130295555 |
| UCKL1 | Naive b cell                | PAAD | -0.301111397 |
| UCKL1 | Naive cd4+ t cell           | PAAD | -0.553470624 |
| UCKL1 | Naive cd8+ t cell           | PAAD | -0.344970784 |
| UCKL1 | Natural killer cell         | PAAD | -0.519006342 |
| UCKL1 | Natural killer t (nkt) cell | PAAD | -0.100155989 |
| UCKL1 | Natural regulatory t (treg) | PAAD | -0.53391435  |
| UCKL1 | Neomycin, kanamycin an      | PAAD | -0.130769126 |
| UCKL1 | Neutrophil                  | PAAD | -0.464947638 |
| UCKL1 | Nicotinate and nicotinami   | PAAD | -0.245553292 |
| UCKL1 | Nitrogen metabolism         | PAAD | -0.243515498 |
| UCKL1 | Nod_like_receptor_signal    | PAAD | -0.505947868 |
| UCKL1 | Notch_signaling             | PAAD | -0.206529994 |
| UCKL1 | One carbon pool by folate   | PAAD | -0.008216039 |
| UCKL1 | Other glycan degradation    | PAAD | 0.398712451  |
| UCKL1 | Other types of o-glycan b   | PAAD | 0.373931365  |
| UCKL1 | Oxidative phosphorylatio    | PAAD | 0.445871648  |
| UCKL1 | P53_pathway                 | PAAD | 0.148724345  |
| UCKL1 | P53_signaling_pathway       | PAAD | -0.060845056 |
| UCKL1 | Pantothenate and coa bios   | PAAD | -0.095903576 |
| UCKL1 | Pentose and glucuronate i   | PAAD | -0.132270594 |
| UCKL1 | Pentose phosphate pathwa    | PAAD | 0.156660275  |
| UCKL1 | Pericyte                    | PAAD | -0.492853749 |
| UCKL1 | Phenylalanine metabolism    | PAAD | 0.030212496  |
| UCKL1 | Phenylalanine, tyrosine ar  | PAAD | 0.194771886  |
| UCKL1 | Phosphonate and phosphir    | PAAD | -0.180686171 |
| UCKL1 | Pi3k_akt_activation         | PAAD | -0.50817641  |
| UCKL1 | Pi3k_akt_mtor_signaling     | PAAD | -0.150329259 |

|       |                            |      |              |
|-------|----------------------------|------|--------------|
| UCKL1 | Porphyrin and chlorophyl   | PAAD | 0.05438351   |
| UCKL1 | Primary bile acid biosynt  | PAAD | -0.238739705 |
| UCKL1 | Propanoate metabolism      | PAAD | -0.19097271  |
| UCKL1 | Purine metabolism          | PAAD | 0.160357909  |
| UCKL1 | Pyrimidine metabolism      | PAAD | 0.389376538  |
| UCKL1 | Pyruvate metabolism        | PAAD | 0.130718929  |
| UCKL1 | Regulation_of_autophagy    | PAAD | 0.225968607  |
| UCKL1 | Retinol metabolism         | PAAD | -0.185084025 |
| UCKL1 | Riboflavin metabolism      | PAAD | 0.106385673  |
| UCKL1 | Schmahl_pdgf_signaling     | PAAD | -0.500232398 |
| UCKL1 | Selenocompound metabol     | PAAD | -0.302784485 |
| UCKL1 | Signaling_by_hippo         | PAAD | -0.533892034 |
| UCKL1 | Sphingolipid metabolism    | PAAD | -0.283664045 |
| UCKL1 | Starch and sucrose metabo  | PAAD | -0.328672672 |
| UCKL1 | Steroid biosynthesis       | PAAD | 0.099324575  |
| UCKL1 | Steroid hormone biosynth   | PAAD | -0.189248752 |
| UCKL1 | Sulfur metabolism          | PAAD | -0.057201805 |
| UCKL1 | Synthesis and degradation  | PAAD | -0.057584525 |
| UCKL1 | T helper cell              | PAAD | -0.493540345 |
| UCKL1 | T helper1 (th1) cell       | PAAD | -0.50424412  |
| UCKL1 | T helper17 (th17) cell     | PAAD | -0.468044325 |
| UCKL1 | T helper2 (th2) cell       | PAAD | -0.470206749 |
| UCKL1 | T helper9 (th9) cell       | PAAD | -0.41375169  |
| UCKL1 | Taurine and hypotaurine r  | PAAD | -0.02117492  |
| UCKL1 | Terpenoid backbone biosy   | PAAD | 0.176712611  |
| UCKL1 | Tgf_beta_signaling_pathw   | PAAD | -0.665710221 |
| UCKL1 | Thiamine metabolism        | PAAD | 0.127516047  |
| UCKL1 | Tnfa_signaling_via_nfkb    | PAAD | -0.340040607 |
| UCKL1 | Tryptophan metabolism      | PAAD | -0.326149303 |
| UCKL1 | Tumor endothelial cell     | PAAD | 0.009445184  |
| UCKL1 | Tyrosine metabolism        | PAAD | -0.012235753 |
| UCKL1 | Ubiquinone and other ter   | PAAD | 0.204869597  |
| UCKL1 | Valine, leucine and isoleu | PAAD | 0.11560737   |
| UCKL1 | Valine, leucine and isoleu | PAAD | -0.075824464 |
| UCKL1 | Vascular endothelial cell  | PAAD | -0.430302956 |
| UCKL1 | Vascular smooth muscle c   | PAAD | -0.399622114 |
| UCKL1 | Vegf_signaling_pathway     | PAAD | -0.267725262 |
| UCKL1 | Vitamin b6 metabolism      | PAAD | 0.209733542  |
| UCKL1 | Willert_wnt_signaling      | PAAD | -0.221449941 |
| UCKL1 | Wnt_beta_catenin_signali   | PAAD | 0.060324964  |
| UPP1  | Abnormal plasma cell       | PAAD | -0.252984292 |
| UPP1  | Activated b cell           | PAAD | 0.100461883  |
| UPP1  | Activated cd4+ t cell      | PAAD | 0.113430719  |



|      |                            |      |              |
|------|----------------------------|------|--------------|
| UPP1 | Activated t cell           | PAAD | 0.104606611  |
| UPP1 | Alanine, aspartate and glu | PAAD | -0.238996655 |
| UPP1 | Alcala_apoptosis           | PAAD | 0.372493938  |
| UPP1 | Alpha-linolenic acid meta  | PAAD | -0.025487627 |
| UPP1 | Amino sugar and nucleoti   | PAAD | 0.344054201  |
| UPP1 | Ampk_pathway               | PAAD | 0.069171558  |
| UPP1 | Angiogenesis               | PAAD | 0.218302874  |
| UPP1 | Arachidonic acid metabol   | PAAD | 0.183415889  |
| UPP1 | Arginine and proline met   | PAAD | 0.039789023  |
| UPP1 | Arginine biosynthesis      | PAAD | -0.095074079 |
| UPP1 | Ascorbate and aldarate m   | PAAD | -0.138917832 |
| UPP1 | Atypical memory b cell     | PAAD | 0.011667374  |
| UPP1 | Axl+siglec6+ dendritic ce  | PAAD | 0.171258721  |
| UPP1 | B cell                     | PAAD | 0.044502392  |
| UPP1 | B1 cell                    | PAAD | -0.036327578 |
| UPP1 | Basal cell                 | PAAD | 0.503437054  |
| UPP1 | Beta-alanine metabolism    | PAAD | -0.22320392  |
| UPP1 | Biosynthesis of unsaturate | PAAD | -0.09969767  |
| UPP1 | Biotin metabolism          | PAAD | -0.265495774 |
| UPP1 | Butanoate metabolism       | PAAD | -0.285920634 |
| UPP1 | Caffeine metabolism        | PAAD | -0.008358259 |
| UPP1 | Cancer stem cell           | PAAD | 0.143965481  |
| UPP1 | Cancer stem-like cell      | PAAD | 0.001515354  |
| UPP1 | Cd4+ cytotoxic t cell      | PAAD | 0.103992408  |
| UPP1 | Cd4+ memory t cell         | PAAD | -0.017501371 |
| UPP1 | Cd4+ regulatory t cell     | PAAD | 0.198878585  |
| UPP1 | Cd4+ t helper cell         | PAAD | 0.026091271  |
| UPP1 | Cd4+cd25+ regulatory t c   | PAAD | 0.057412468  |
| UPP1 | Cd8+ cytotoxic t cell      | PAAD | 0.028884206  |
| UPP1 | Cd8+ regulatory t cell     | PAAD | -0.074694121 |
| UPP1 | Cell_cycle                 | PAAD | 0.170411436  |
| UPP1 | Chandran_metastasis_top5   | PAAD | -0.231765128 |
| UPP1 | Citrate cycle (tca cycle)  | PAAD | -0.080680374 |
| UPP1 | Cysteine and methionine r  | PAAD | -0.041678949 |
| UPP1 | Cytokine induced killer c  | PAAD | -0.170524391 |
| UPP1 | D-arginine and d-ornithin  | PAAD | -0.194197486 |
| UPP1 | D-glutamine and d-glutan   | PAAD | -0.355445972 |
| UPP1 | Dendritic cell             | PAAD | 0.166620674  |
| UPP1 | Dna_repair                 | PAAD | 0.323955182  |
| UPP1 | Dna_replication            | PAAD | 0.223734548  |
| UPP1 | Double-negative memory     | PAAD | 0.047308039  |
| UPP1 | Drug metabolism - cytoch   | PAAD | -0.034949054 |
| UPP1 | Drug metabolism - other    | PAAD | 0.294031089  |

|      |                              |      |              |
|------|------------------------------|------|--------------|
| UPP1 | E2f_targets                  | PAAD | 0.145513236  |
| UPP1 | Ecm_receptor_interaction     | PAAD | 0.198500605  |
| UPP1 | Effector cd4+ memory t (     | PAAD | -0.039282158 |
| UPP1 | Effector cd8+ memory t (     | PAAD | 0.154686881  |
| UPP1 | Effector memory t cell       | PAAD | -0.017563173 |
| UPP1 | Effector regulatory t (treg  | PAAD | 0.053477311  |
| UPP1 | Elvidge_hif1a_targets_up     | PAAD | -0.236372929 |
| UPP1 | Endothelial cell             | PAAD | 0.092680847  |
| UPP1 | Eosinophil                   | PAAD | 0.187362628  |
| UPP1 | Ether lipid metabolism       | PAAD | -0.069481727 |
| UPP1 | Exhausted cd4+ t cell        | PAAD | 0.144229182  |
| UPP1 | Exhausted cd8+ t cell        | PAAD | 0.224907683  |
| UPP1 | Exhausted t cell             | PAAD | 0.065013496  |
| UPP1 | Fat cell (adipocyte)         | PAAD | 0.047334929  |
| UPP1 | Fatty acid biosynthesis      | PAAD | -0.201587168 |
| UPP1 | Fatty acid degradation       | PAAD | -0.339419898 |
| UPP1 | Fatty acid elongation        | PAAD | -0.027558605 |
| UPP1 | Fibroblast                   | PAAD | 0.141690297  |
| UPP1 | Folate biosynthesis          | PAAD | -0.067014536 |
| UPP1 | Follicular b cell            | PAAD | 0.04786118   |
| UPP1 | Follicular dendritic cell    | PAAD | 0.017792222  |
| UPP1 | Follicular helper (tfh) t ce | PAAD | 0.08673053   |
| UPP1 | Follicular t cell            | PAAD | 0.20397667   |
| UPP1 | Foxp3+il-17+ t cell          | PAAD | 0.073246594  |
| UPP1 | Fructose and mannose me      | PAAD | 0.321174183  |
| UPP1 | G2m_checkpoint               | PAAD | 0.065791334  |
| UPP1 | Galactose metabolism         | PAAD | 0.412398307  |
| UPP1 | Galie_tumor_stemness_ge      | PAAD | 0.015802889  |
| UPP1 | Glutathione metabolism       | PAAD | 0.254804778  |
| UPP1 | Glycerolipid metabolism      | PAAD | 0.062377955  |
| UPP1 | Glycerophospholipid metæ     | PAAD | 0.227529032  |
| UPP1 | Glycine, serine and threor   | PAAD | -0.08185224  |
| UPP1 | Glycolysis / gluconeogene    | PAAD | 0.244624822  |
| UPP1 | Glycosaminoglycan biosy1     | PAAD | 0.392408421  |
| UPP1 | Glycosaminoglycan biosy1     | PAAD | -0.063718701 |
| UPP1 | Glycosaminoglycan biosy1     | PAAD | 0.365012123  |
| UPP1 | Glycosaminoglycan degra      | PAAD | 0.263914796  |
| UPP1 | Glycosphingolipid biosyn1    | PAAD | -0.01379002  |
| UPP1 | Glycosphingolipid biosyn1    | PAAD | 0.187921149  |
| UPP1 | Glycosphingolipid biosyn1    | PAAD | 0.199532172  |
| UPP1 | Glycosylphosphatidylinos     | PAAD | -0.192404235 |
| UPP1 | Glyoxylate and dicarboxy     | PAAD | -0.085542967 |
| UPP1 | Granulocyte                  | PAAD | 0.156486681  |

|      |                             |      |              |
|------|-----------------------------|------|--------------|
| UPP1 | Hedgehog_signaling          | PAAD | -0.091445489 |
| UPP1 | Histidine metabolism        | PAAD | -0.129233255 |
| UPP1 | Hypoxia                     | PAAD | 0.517245227  |
| UPP1 | Il-17alpha t cell           | PAAD | -0.036388225 |
| UPP1 | Il2_stat5_signaling         | PAAD | 0.269726488  |
| UPP1 | Il6_jak_stat3_signaling     | PAAD | 0.216380404  |
| UPP1 | Immune_checkpoints_tun      | PAAD | 0.254047075  |
| UPP1 | Immune_inhibition_cytok     | PAAD | 0.248471949  |
| UPP1 | Inositol phosphate metabo   | PAAD | -0.389431107 |
| UPP1 | Interleukin_6_signaling     | PAAD | -0.219335982 |
| UPP1 | Jaeger_metastasis_up        | PAAD | 0.266573152  |
| UPP1 | Jain_nfkb_signaling         | PAAD | 0.147034975  |
| UPP1 | Kras_signaling_up           | PAAD | 0.156429483  |
| UPP1 | Linoleic acid metabolism    | PAAD | -0.0334497   |
| UPP1 | Lipoic acid metabolism      | PAAD | -0.230343518 |
| UPP1 | Lysine degradation          | PAAD | -0.3723462   |
| UPP1 | Lysosome                    | PAAD | 0.279336476  |
| UPP1 | M1 macrophage               | PAAD | 0.164344513  |
| UPP1 | M2 macrophage               | PAAD | 0.158130545  |
| UPP1 | Mannose type o-glycan bi    | PAAD | -0.034868451 |
| UPP1 | Mapk_signaling_pathway      | PAAD | 0.080711226  |
| UPP1 | Mapk3_erk1_activation       | PAAD | -0.160431109 |
| UPP1 | Marginal zone b cell        | PAAD | 0.020488146  |
| UPP1 | Memory b cell               | PAAD | 0.033859934  |
| UPP1 | Mesenchymal cell            | PAAD | 0.322023555  |
| UPP1 | Mesenchymal stem cell       | PAAD | 0.149854563  |
| UPP1 | Metabolism of xenobiotic    | PAAD | 0.044675513  |
| UPP1 | Migrating cancer stem cel   | PAAD | 0.105041658  |
| UPP1 | Mitotic_spindle             | PAAD | -0.085148823 |
| UPP1 | Monocyte                    | PAAD | 0.367088844  |
| UPP1 | Mtor_signaling_pathway      | PAAD | -0.132761332 |
| UPP1 | Mtorc1_signaling            | PAAD | 0.280689145  |
| UPP1 | Mucin type o-glycan biosy   | PAAD | -0.083596248 |
| UPP1 | Myc_targets_v1              | PAAD | 0.225677197  |
| UPP1 | Myeloid cell                | PAAD | 0.109646935  |
| UPP1 | N-glycan biosynthesis       | PAAD | -0.085447232 |
| UPP1 | Naive b cell                | PAAD | 0.035253601  |
| UPP1 | Naive cd4+ t cell           | PAAD | -0.076282519 |
| UPP1 | Naive cd8+ t cell           | PAAD | -0.101704866 |
| UPP1 | Natural killer cell         | PAAD | 0.037402168  |
| UPP1 | Natural killer t (nkt) cell | PAAD | 0.267377444  |
| UPP1 | Natural regulatory t (treg) | PAAD | 0.062099224  |
| UPP1 | Neomycin, kanamycin and     | PAAD | 0.440325564  |

|      |                            |      |              |
|------|----------------------------|------|--------------|
| UPP1 | Neutrophil                 | PAAD | 0.377295692  |
| UPP1 | Nicotinate and nicotinami  | PAAD | -0.074019215 |
| UPP1 | Nitrogen metabolism        | PAAD | -0.062737658 |
| UPP1 | Nod_like_receptor_signal   | PAAD | 0.167877201  |
| UPP1 | Notch_signaling            | PAAD | 0.314582494  |
| UPP1 | One carbon pool by folate  | PAAD | -0.071661311 |
| UPP1 | Other glycan degradation   | PAAD | 0.242661424  |
| UPP1 | Other types of o-glycan b  | PAAD | 0.311417796  |
| UPP1 | Oxidative phosphorylatior  | PAAD | 0.237232906  |
| UPP1 | P53_pathway                | PAAD | 0.608100564  |
| UPP1 | P53_signaling_pathway      | PAAD | 0.275826813  |
| UPP1 | Pantothenate and coa bios  | PAAD | -0.143893851 |
| UPP1 | Pentose and glucuronate i  | PAAD | -0.039429279 |
| UPP1 | Pentose phosphate pathwa   | PAAD | 0.341228144  |
| UPP1 | Pericyte                   | PAAD | 0.088291696  |
| UPP1 | Phenylalanine metabolism   | PAAD | 0.211304166  |
| UPP1 | Phenylalanine, tyrosine ar | PAAD | 0.014532598  |
| UPP1 | Phosphonate and phosphir   | PAAD | -0.031702463 |
| UPP1 | Pi3k_akt_activation        | PAAD | -0.089854061 |
| UPP1 | Pi3k_akt_mtor_signaling    | PAAD | 0.269694258  |
| UPP1 | Porphyrin and chlorophyl   | PAAD | 0.040967108  |
| UPP1 | Primary bile acid biosynt  | PAAD | -0.2846687   |
| UPP1 | Propanoate metabolism      | PAAD | -0.459694905 |
| UPP1 | Purine metabolism          | PAAD | 0.088835651  |
| UPP1 | Pyrimidine metabolism      | PAAD | 0.264143376  |
| UPP1 | Pyruvate metabolism        | PAAD | -0.186874401 |
| UPP1 | Regulation_of_autophagy    | PAAD | -0.056352112 |
| UPP1 | Retinol metabolism         | PAAD | -0.058988201 |
| UPP1 | Riboflavin metabolism      | PAAD | 0.144810572  |
| UPP1 | Schmahl_pdgf_signaling     | PAAD | -0.00356645  |
| UPP1 | Selenocompound metabol     | PAAD | -0.517348196 |
| UPP1 | Signaling_by_hippo         | PAAD | -0.259443707 |
| UPP1 | Sphingolipid metabolism    | PAAD | -0.251767424 |
| UPP1 | Starch and sucrose metabo  | PAAD | 0.182100146  |
| UPP1 | Steroid biosynthesis       | PAAD | 0.171614245  |
| UPP1 | Steroid hormone biosynth   | PAAD | 0.051147835  |
| UPP1 | Sulfur metabolism          | PAAD | -0.22162628  |
| UPP1 | Synthesis and degradation  | PAAD | -0.130612758 |
| UPP1 | T helper cell              | PAAD | 0.012611752  |
| UPP1 | T helper1 (th1) cell       | PAAD | 0.113248305  |
| UPP1 | T helper17 (th17) cell     | PAAD | 0.151604065  |
| UPP1 | T helper2 (th2) cell       | PAAD | 0.106313056  |
| UPP1 | T helper9 (th9) cell       | PAAD | 0.088723577  |

|      |                            |      |              |
|------|----------------------------|------|--------------|
| UPP1 | Taurine and hypotaurine r  | PAAD | 0.110460119  |
| UPP1 | Terpenoid backbone biosy   | PAAD | -0.024618825 |
| UPP1 | Tgf_beta_signaling_pathw   | PAAD | -0.148182034 |
| UPP1 | Thiamine metabolism        | PAAD | 0.000464438  |
| UPP1 | Tnfa_signaling_via_nfkb    | PAAD | 0.39725477   |
| UPP1 | Tryptophan metabolism      | PAAD | -0.193715251 |
| UPP1 | Tumor endothelial cell     | PAAD | 0.231520061  |
| UPP1 | Tyrosine metabolism        | PAAD | 0.040103449  |
| UPP1 | Ubiquinone and other ter   | PAAD | -0.074970864 |
| UPP1 | Valine, leucine and isoleu | PAAD | 0.290136935  |
| UPP1 | Valine, leucine and isoleu | PAAD | -0.390941399 |
| UPP1 | Vascular endothelial cell  | PAAD | 0.079781921  |
| UPP1 | Vascular smooth muscle c   | PAAD | 0.044434237  |
| UPP1 | Vegf_signaling_pathway     | PAAD | 0.247657355  |
| UPP1 | Vitamin b6 metabolism      | PAAD | -0.12565122  |
| UPP1 | Willert_wnt_signaling      | PAAD | 0.175570454  |
| UPP1 | Wnt_beta_catenin_signali   | PAAD | 0.172699087  |
| UPP2 | Abnormal plasma cell       | PAAD | 0.005810387  |
| UPP2 | Activated b cell           | PAAD | -0.121847733 |
| UPP2 | Activated cd4+ t cell      | PAAD | -0.165648979 |
| UPP2 | Activated t cell           | PAAD | -0.209838116 |
| UPP2 | Alanine, aspartate and glu | PAAD | -0.063531159 |
| UPP2 | Alcala_apoptosis           | PAAD | -0.227957619 |
| UPP2 | Alpha-linolenic acid meta  | PAAD | -0.0789803   |
| UPP2 | Amino sugar and nucleoti   | PAAD | -0.194255199 |
| UPP2 | Ampk_pathway               | PAAD | -0.011363402 |
| UPP2 | Angiogenesis               | PAAD | -0.116923501 |
| UPP2 | Arachidonic acid metabol   | PAAD | -0.183436588 |
| UPP2 | Arginine and proline met   | PAAD | -0.204385904 |
| UPP2 | Arginine biosynthesis      | PAAD | -0.222477543 |
| UPP2 | Ascorbate and aldarate m   | PAAD | -0.170722867 |
| UPP2 | Atypical memory b cell     | PAAD | -0.131084261 |
| UPP2 | Axl+siglec6+ dendritic ce  | PAAD | -0.235874102 |
| UPP2 | B cell                     | PAAD | -0.213536837 |
| UPP2 | B1 cell                    | PAAD | -0.085704979 |
| UPP2 | Basal cell                 | PAAD | -0.205982744 |
| UPP2 | Beta-alanine metabolism    | PAAD | -0.165145017 |
| UPP2 | Biosynthesis of unsaturate | PAAD | -0.14428692  |
| UPP2 | Biotin metabolism          | PAAD | -0.098016657 |
| UPP2 | Butanoate metabolism       | PAAD | 0.065725824  |
| UPP2 | Caffeine metabolism        | PAAD | -0.095030362 |
| UPP2 | Cancer stem cell           | PAAD | -0.241280446 |
| UPP2 | Cancer stem-like cell      | PAAD | -0.272642326 |

|      |                              |      |              |
|------|------------------------------|------|--------------|
| UPP2 | Cd4+ cytotoxic t cell        | PAAD | -0.184823556 |
| UPP2 | Cd4+ memory t cell           | PAAD | -0.127261053 |
| UPP2 | Cd4+ regulatory t cell       | PAAD | -0.142036296 |
| UPP2 | Cd4+ t helper cell           | PAAD | -0.15402666  |
| UPP2 | Cd4+cd25+ regulatory t c     | PAAD | -0.16543321  |
| UPP2 | Cd8+ cytotoxic t cell        | PAAD | -0.185076848 |
| UPP2 | Cd8+ regulatory t cell       | PAAD | -0.141918572 |
| UPP2 | Cell_cycle                   | PAAD | -0.139464123 |
| UPP2 | Chandran_metastasis_top5     | PAAD | -0.135869061 |
| UPP2 | Citrate cycle (tca cycle)    | PAAD | -0.062695504 |
| UPP2 | Cysteine and methionine r    | PAAD | -0.211600225 |
| UPP2 | Cytokine induced killer ce   | PAAD | 0.01493799   |
| UPP2 | D-arginine and d-ornithin    | PAAD | 0.173304086  |
| UPP2 | D-glutamine and d-glutan     | PAAD | 0.000852381  |
| UPP2 | Dendritic cell               | PAAD | -0.168360755 |
| UPP2 | Dna_repair                   | PAAD | 0.013012968  |
| UPP2 | Dna_replication              | PAAD | -0.116002146 |
| UPP2 | Double-negative memory       | PAAD | -0.103319012 |
| UPP2 | Drug metabolism - cytoch     | PAAD | -0.183987801 |
| UPP2 | Drug metabolism - other c    | PAAD | -0.131922654 |
| UPP2 | E2f_targets                  | PAAD | -0.122105187 |
| UPP2 | Ecm_receptor_interaction     | PAAD | -0.214978624 |
| UPP2 | Effector cd4+ memory t (     | PAAD | -0.129380798 |
| UPP2 | Effector cd8+ memory t (     | PAAD | -0.147327166 |
| UPP2 | Effector memory t cell       | PAAD | -0.140262917 |
| UPP2 | Effector regulatory t (treg  | PAAD | -0.13410276  |
| UPP2 | Elvidge_hif1a_targets_up     | PAAD | -0.214046469 |
| UPP2 | Endothelial cell             | PAAD | -0.164040971 |
| UPP2 | Eosinophil                   | PAAD | -0.163950435 |
| UPP2 | Ether lipid metabolism       | PAAD | -0.079993459 |
| UPP2 | Exhausted cd4+ t cell        | PAAD | -0.204855118 |
| UPP2 | Exhausted cd8+ t cell        | PAAD | -0.217849024 |
| UPP2 | Exhausted t cell             | PAAD | -0.16335682  |
| UPP2 | Fat cell (adipocyte)         | PAAD | -0.033576108 |
| UPP2 | Fatty acid biosynthesis      | PAAD | -0.013892681 |
| UPP2 | Fatty acid degradation       | PAAD | -0.112595521 |
| UPP2 | Fatty acid elongation        | PAAD | -0.057588802 |
| UPP2 | Fibroblast                   | PAAD | -0.146846618 |
| UPP2 | Folate biosynthesis          | PAAD | -0.024556328 |
| UPP2 | Follicular b cell            | PAAD | -0.150013572 |
| UPP2 | Follicular dendritic cell    | PAAD | -0.094115598 |
| UPP2 | Follicular helper (tfh) t ce | PAAD | -0.189462422 |
| UPP2 | Follicular t cell            | PAAD | -0.191523886 |

|      |                            |      |              |
|------|----------------------------|------|--------------|
| UPP2 | Foxp3+il-17+ t cell        | PAAD | -0.085715652 |
| UPP2 | Fructose and mannose me    | PAAD | -0.153077777 |
| UPP2 | G2m_checkpoint             | PAAD | -0.189528485 |
| UPP2 | Galactose metabolism       | PAAD | -0.252201558 |
| UPP2 | Galie_tumor_stemness_ge    | PAAD | -0.202935222 |
| UPP2 | Glutathione metabolism     | PAAD | -0.164642459 |
| UPP2 | Glycerolipid metabolism    | PAAD | -0.194505647 |
| UPP2 | Glycerophospholipid metæ   | PAAD | 0.020249976  |
| UPP2 | Glycine, serine and threor | PAAD | 0.019907174  |
| UPP2 | Glycolysis / gluconeogene  | PAAD | -0.233464337 |
| UPP2 | Glycosaminoglycan biosyn   | PAAD | 0.015867723  |
| UPP2 | Glycosaminoglycan biosyn   | PAAD | 0.049226109  |
| UPP2 | Glycosaminoglycan biosyn   | PAAD | -0.248097354 |
| UPP2 | Glycosaminoglycan degra    | PAAD | -0.020610219 |
| UPP2 | Glycosphingolipid biosyn   | PAAD | 0.02661905   |
| UPP2 | Glycosphingolipid biosyn   | PAAD | -0.041671507 |
| UPP2 | Glycosphingolipid biosyn   | PAAD | -0.188943928 |
| UPP2 | Glycosylphosphatidylinos   | PAAD | 0.091720276  |
| UPP2 | Glyoxylate and dicarboxy   | PAAD | 0.010087215  |
| UPP2 | Granulocyte                | PAAD | -0.175508702 |
| UPP2 | Hedgehog_signaling         | PAAD | 0.067916381  |
| UPP2 | Histidine metabolism       | PAAD | -0.217367466 |
| UPP2 | Hypoxia                    | PAAD | -0.146485013 |
| UPP2 | Il-17ralpha t cell         | PAAD | -0.166701985 |
| UPP2 | Il2_stat5_signaling        | PAAD | -0.283470581 |
| UPP2 | Il6_jak_stat3_signaling    | PAAD | -0.249245474 |
| UPP2 | Immune_checkpoints_tun     | PAAD | -0.162580105 |
| UPP2 | Immune_inhibition_cytok    | PAAD | -0.143720154 |
| UPP2 | Inositol phosphate metabo  | PAAD | -0.117648015 |
| UPP2 | Interleukin_6_signaling    | PAAD | -0.11973154  |
| UPP2 | Jaeger_metastasis_up       | PAAD | -0.192951563 |
| UPP2 | Jain_nfkb_signaling        | PAAD | -0.095768559 |
| UPP2 | Kras_signaling_up          | PAAD | -0.194072497 |
| UPP2 | Linoleic acid metabolism   | PAAD | -0.0626803   |
| UPP2 | Lipoic acid metabolism     | PAAD | 0.08877697   |
| UPP2 | Lysine degradation         | PAAD | -0.06571808  |
| UPP2 | Lysosome                   | PAAD | 0.000521679  |
| UPP2 | M1 macrophage              | PAAD | -0.199826131 |
| UPP2 | M2 macrophage              | PAAD | -0.080048746 |
| UPP2 | Mannose type o-glycan bi   | PAAD | 0.216242414  |
| UPP2 | Mapk_signaling_pathway     | PAAD | -0.136258856 |
| UPP2 | Mapk3_erk1_activation      | PAAD | -0.138260438 |
| UPP2 | Marginal zone b cell       | PAAD | -0.153486    |

|      |                                          |      |              |
|------|------------------------------------------|------|--------------|
| UPP2 | Memory b cell                            | PAAD | -0.110248652 |
| UPP2 | Mesenchymal cell                         | PAAD | -0.09864526  |
| UPP2 | Mesenchymal stem cell                    | PAAD | -0.172352192 |
| UPP2 | Metabolism of xenobiotics                | PAAD | -0.177666083 |
| UPP2 | Migrating cancer stem cell               | PAAD | -0.270145908 |
| UPP2 | Mitotic_spindle                          | PAAD | -0.222401997 |
| UPP2 | Monocyte                                 | PAAD | -0.209372619 |
| UPP2 | Mtor_signaling_pathway                   | PAAD | -0.015192391 |
| UPP2 | Mtorc1_signaling                         | PAAD | -0.21127104  |
| UPP2 | Mucin type o-glycan biosynthesis         | PAAD | -0.334430181 |
| UPP2 | Myc_targets_v1                           | PAAD | -0.144357622 |
| UPP2 | Myeloid cell                             | PAAD | -0.171025244 |
| UPP2 | N-glycan biosynthesis                    | PAAD | -0.174868777 |
| UPP2 | Naive b cell                             | PAAD | -0.143142924 |
| UPP2 | Naive cd4+ t cell                        | PAAD | -0.12642248  |
| UPP2 | Naive cd8+ t cell                        | PAAD | -0.006085828 |
| UPP2 | Natural killer cell                      | PAAD | -0.163325575 |
| UPP2 | Natural killer t (nkt) cell              | PAAD | -0.2263368   |
| UPP2 | Natural regulatory t (treg) cell         | PAAD | -0.155500969 |
| UPP2 | Neomycin, kanamycin and streptomycin     | PAAD | -0.217041063 |
| UPP2 | Neutrophil                               | PAAD | -0.225025268 |
| UPP2 | Nicotinate and nicotinamide              | PAAD | -0.145108082 |
| UPP2 | Nitrogen metabolism                      | PAAD | -0.203954159 |
| UPP2 | Nod_like_receptor_signaling              | PAAD | -0.145194722 |
| UPP2 | Notch_signaling                          | PAAD | -0.239697632 |
| UPP2 | One carbon pool by folate                | PAAD | -0.230506301 |
| UPP2 | Other glycan degradation                 | PAAD | 0.087993586  |
| UPP2 | Other types of o-glycan biosynthesis     | PAAD | 0.125540621  |
| UPP2 | Oxidative phosphorylation                | PAAD | 0.036354412  |
| UPP2 | P53_pathway                              | PAAD | -0.194565341 |
| UPP2 | P53_signaling_pathway                    | PAAD | -0.211876032 |
| UPP2 | Pantothenate and coenzyme a biosynthesis | PAAD | -0.024559226 |
| UPP2 | Pentose and glucuronate interconversions | PAAD | -0.141135381 |
| UPP2 | Pentose phosphate pathway                | PAAD | -0.150488014 |
| UPP2 | Pericyte                                 | PAAD | -0.089194878 |
| UPP2 | Phenylalanine metabolism                 | PAAD | -0.119335052 |
| UPP2 | Phenylalanine, tyrosine and tryptophan   | PAAD | 0.083635412  |
| UPP2 | Phosphonate and phosphite metabolism     | PAAD | -0.111601289 |
| UPP2 | Pi3k_akt_activation                      | PAAD | -0.169715173 |
| UPP2 | Pi3k_akt_mtor_signaling                  | PAAD | -0.231228925 |
| UPP2 | Porphyrin and chlorophyll metabolism     | PAAD | -0.136148286 |
| UPP2 | Primary bile acid biosynthesis           | PAAD | 0.117745272  |
| UPP2 | Propanoate metabolism                    | PAAD | -0.062973489 |



|      |                            |      |              |
|------|----------------------------|------|--------------|
| UPP2 | Purine metabolism          | PAAD | -0.183682168 |
| UPP2 | Pyrimidine metabolism      | PAAD | -0.069457891 |
| UPP2 | Pyruvate metabolism        | PAAD | -0.042319535 |
| UPP2 | Regulation_of_autophagy    | PAAD | 0.079355576  |
| UPP2 | Retinol metabolism         | PAAD | -0.082919182 |
| UPP2 | Riboflavin metabolism      | PAAD | -0.141390583 |
| UPP2 | Schmahl_pdgf_signaling     | PAAD | -0.102297882 |
| UPP2 | Selenocompound metabol     | PAAD | -0.141818616 |
| UPP2 | Signaling_by_hippo         | PAAD | -0.162176032 |
| UPP2 | Sphingolipid metabolism    | PAAD | -0.108164524 |
| UPP2 | Starch and sucrose metabo  | PAAD | -0.119009291 |
| UPP2 | Steroid biosynthesis       | PAAD | -0.035718699 |
| UPP2 | Steroid hormone biosynth   | PAAD | -0.152897958 |
| UPP2 | Sulfur metabolism          | PAAD | -0.122814383 |
| UPP2 | Synthesis and degradation  | PAAD | 0.062431238  |
| UPP2 | T helper cell              | PAAD | -0.13860204  |
| UPP2 | T helper1 (th1) cell       | PAAD | -0.215087789 |
| UPP2 | T helper17 (th17) cell     | PAAD | -0.183721821 |
| UPP2 | T helper2 (th2) cell       | PAAD | -0.195209972 |
| UPP2 | T helper9 (th9) cell       | PAAD | -0.17938234  |
| UPP2 | Taurine and hypotaurine r  | PAAD | -0.039803518 |
| UPP2 | Terpenoid backbone biosy   | PAAD | -0.03742563  |
| UPP2 | Tgf_beta_signaling_pathw   | PAAD | -0.147390548 |
| UPP2 | Thiamine metabolism        | PAAD | -0.074061945 |
| UPP2 | Tnfa_signaling_via_nfb     | PAAD | -0.20669818  |
| UPP2 | Tryptophan metabolism      | PAAD | -0.035119384 |
| UPP2 | Tumor endothelial cell     | PAAD | -0.047676558 |
| UPP2 | Tyrosine metabolism        | PAAD | -0.059864053 |
| UPP2 | Ubiquinone and other ter   | PAAD | 0.053513703  |
| UPP2 | Valine, leucine and isoleu | PAAD | -0.050417458 |
| UPP2 | Valine, leucine and isoleu | PAAD | -0.019741974 |
| UPP2 | Vascular endothelial cell  | PAAD | -0.065261066 |
| UPP2 | Vascular smooth muscle c   | PAAD | -0.151450218 |
| UPP2 | Vegf_signaling_pathway     | PAAD | -0.175708775 |
| UPP2 | Vitamin b6 metabolism      | PAAD | 0.082862988  |
| UPP2 | Willert_wnt_signaling      | PAAD | -0.195438947 |
| UPP2 | Wnt_beta_catenin_signali   | PAAD | -0.056770056 |
| CDA  | Abnormal plasma cell       | PCPG | -0.090791943 |
| CDA  | Activated b cell           | PCPG | 0.236295076  |
| CDA  | Activated cd4+ t cell      | PCPG | 0.107102359  |
| CDA  | Activated t cell           | PCPG | 0.222435531  |
| CDA  | Alanine, aspartate and glu | PCPG | -0.189059466 |
| CDA  | Alcala_apoptosis           | PCPG | 0.173532786  |

|     |                            |      |              |
|-----|----------------------------|------|--------------|
| CDA | Alpha-linolenic acid meta  | PCPG | 0.077834848  |
| CDA | Amino sugar and nucleoti   | PCPG | -0.071146305 |
| CDA | Ampk_pathway               | PCPG | -0.048807417 |
| CDA | Angiogenesis               | PCPG | 0.543728007  |
| CDA | Arachidonic acid metabol   | PCPG | 0.428975959  |
| CDA | Arginine and proline met   | PCPG | 0.118205034  |
| CDA | Arginine biosynthesis      | PCPG | -0.232572096 |
| CDA | Ascorbate and aldarate m   | PCPG | -0.289441063 |
| CDA | Atypical memory b cell     | PCPG | -0.036872908 |
| CDA | Axl+siglec6+ dendritic ce  | PCPG | 0.376169827  |
| CDA | B cell                     | PCPG | 0.334569642  |
| CDA | B1 cell                    | PCPG | 0.197573544  |
| CDA | Basal cell                 | PCPG | 0.638813162  |
| CDA | Beta-alanine metabolism    | PCPG | 0.106279113  |
| CDA | Biosynthesis of unsaturate | PCPG | -0.333413312 |
| CDA | Biotin metabolism          | PCPG | -0.35783726  |
| CDA | Butanoate metabolism       | PCPG | -0.334851662 |
| CDA | Caffeine metabolism        | PCPG | 0.148361257  |
| CDA | Cancer stem cell           | PCPG | 0.515003739  |
| CDA | Cancer stem-like cell      | PCPG | 0.382672833  |
| CDA | Cd4+ cytotoxic t cell      | PCPG | 0.475710973  |
| CDA | Cd4+ memory t cell         | PCPG | -0.006178824 |
| CDA | Cd4+ regulatory t cell     | PCPG | 0.213406906  |
| CDA | Cd4+ t helper cell         | PCPG | 0.183150883  |
| CDA | Cd4+cd25+ regulatory t c   | PCPG | 0.172318945  |
| CDA | Cd8+ cytotoxic t cell      | PCPG | 0.266045952  |
| CDA | Cd8+ regulatory t cell     | PCPG | -0.003135127 |
| CDA | Cell_cycle                 | PCPG | -0.239417572 |
| CDA | Chandran_metastasis_top5   | PCPG | -0.539501503 |
| CDA | Citrate cycle (tca cycle)  | PCPG | -0.302278746 |
| CDA | Cysteine and methionine r  | PCPG | -0.183581615 |
| CDA | Cytokine induced killer c  | PCPG | 0.073674775  |
| CDA | D-arginine and d-ornithin  | PCPG | 0.120924461  |
| CDA | D-glutamine and d-glutan   | PCPG | -0.697228708 |
| CDA | Dendritic cell             | PCPG | 0.309597983  |
| CDA | Dna_repair                 | PCPG | 0.03001016   |
| CDA | Dna_replication            | PCPG | -0.188873112 |
| CDA | Double-negative memory     | PCPG | 0.047458343  |
| CDA | Drug metabolism - cytoch   | PCPG | 0.021492611  |
| CDA | Drug metabolism - other    | PCPG | 0.248954824  |
| CDA | E2f_targets                | PCPG | -0.339318336 |
| CDA | Ecm_receptor_interaction   | PCPG | 0.476230122  |
| CDA | Effector cd4+ memory t (   | PCPG | -0.014000425 |

|     |                              |      |              |
|-----|------------------------------|------|--------------|
| CDA | Effector cd8+ memory t (     | PCPG | 0.429071057  |
| CDA | Effector memory t cell       | PCPG | 0.059613882  |
| CDA | Effector regulatory t (treg  | PCPG | 0.274940507  |
| CDA | Elvidge_hif1a_targets_up     | PCPG | -0.533094243 |
| CDA | Endothelial cell             | PCPG | 0.673134218  |
| CDA | Eosinophil                   | PCPG | 0.294362997  |
| CDA | Ether lipid metabolism       | PCPG | -0.042144982 |
| CDA | Exhausted cd4+ t cell        | PCPG | 0.324083348  |
| CDA | Exhausted cd8+ t cell        | PCPG | 0.296580515  |
| CDA | Exhausted t cell             | PCPG | 0.068371587  |
| CDA | Fat cell (adipocyte)         | PCPG | 0.11340781   |
| CDA | Fatty acid biosynthesis      | PCPG | -0.110658353 |
| CDA | Fatty acid degradation       | PCPG | -0.261279585 |
| CDA | Fatty acid elongation        | PCPG | -0.280639262 |
| CDA | Fibroblast                   | PCPG | 0.474006023  |
| CDA | Folate biosynthesis          | PCPG | -0.171472927 |
| CDA | Follicular b cell            | PCPG | 0.171668576  |
| CDA | Follicular dendritic cell    | PCPG | 0.116376395  |
| CDA | Follicular helper (tfh) t ce | PCPG | 0.25021273   |
| CDA | Follicular t cell            | PCPG | 0.080529921  |
| CDA | Foxp3+il-17+ t cell          | PCPG | -0.274245446 |
| CDA | Fructose and mannose me      | PCPG | 0.283711786  |
| CDA | G2m_checkpoint               | PCPG | -0.361681297 |
| CDA | Galactose metabolism         | PCPG | 0.283974715  |
| CDA | Galie_tumor_stemness_ge      | PCPG | 0.349841102  |
| CDA | Glutathione metabolism       | PCPG | 0.189653878  |
| CDA | Glycerolipid metabolism      | PCPG | -0.046032269 |
| CDA | Glycerophospholipid metæ     | PCPG | 0.26512459   |
| CDA | Glycine, serine and threor   | PCPG | -0.018218784 |
| CDA | Glycolysis / gluconeogene    | PCPG | 0.090309726  |
| CDA | Glycosaminoglycan biosy      | PCPG | 0.527150113  |
| CDA | Glycosaminoglycan biosy      | PCPG | 0.187171871  |
| CDA | Glycosaminoglycan biosy      | PCPG | 0.479128549  |
| CDA | Glycosaminoglycan degra      | PCPG | 0.188343154  |
| CDA | Glycosphingolipid biosyn     | PCPG | 0.151335821  |
| CDA | Glycosphingolipid biosyn     | PCPG | 0.453259617  |
| CDA | Glycosphingolipid biosyn     | PCPG | 0.410260575  |
| CDA | Glycosylphosphatidylinos     | PCPG | -0.381783813 |
| CDA | Glyoxylate and dicarboxy     | PCPG | -0.173850804 |
| CDA | Granulocyte                  | PCPG | 0.224811998  |
| CDA | Hedgehog_signaling           | PCPG | 0.292029383  |
| CDA | Histidine metabolism         | PCPG | -0.077241097 |
| CDA | Hypoxia                      | PCPG | 0.553259009  |

|     |                             |      |              |
|-----|-----------------------------|------|--------------|
| CDA | Il-17alpha t cell           | PCPG | 0.066226369  |
| CDA | Il2_stat5_signaling         | PCPG | 0.347641288  |
| CDA | Il6_jak_stat3_signaling     | PCPG | 0.203714507  |
| CDA | Immune_checkpoints_tur      | PCPG | -0.058925092 |
| CDA | Immune_inhibition_cytok     | PCPG | 0.240989465  |
| CDA | Inositol phosphate metabo   | PCPG | -0.178865158 |
| CDA | Interleukin_6_signaling     | PCPG | -0.052571128 |
| CDA | Jaeger_metastasis_up        | PCPG | 0.128392295  |
| CDA | Jain_nfkb_signaling         | PCPG | 0.049838823  |
| CDA | Kras_signaling_up           | PCPG | 0.287694908  |
| CDA | Linoleic acid metabolism    | PCPG | 0.188238001  |
| CDA | Lipoic acid metabolism      | PCPG | -0.116064587 |
| CDA | Lysine degradation          | PCPG | -0.470103503 |
| CDA | Lysosome                    | PCPG | -0.094324417 |
| CDA | M1 macrophage               | PCPG | 0.202550493  |
| CDA | M2 macrophage               | PCPG | 0.254480895  |
| CDA | Mannose type o-glycan bi    | PCPG | 0.08216997   |
| CDA | Mapk_signaling_pathway      | PCPG | 0.177174425  |
| CDA | Mapk3_erk1_activation       | PCPG | -0.079015193 |
| CDA | Marginal zone b cell        | PCPG | 0.334702234  |
| CDA | Memory b cell               | PCPG | -0.024222454 |
| CDA | Mesenchymal cell            | PCPG | 0.570647743  |
| CDA | Mesenchymal stem cell       | PCPG | 0.460298198  |
| CDA | Metabolism of xenobiotic    | PCPG | 0.063730531  |
| CDA | Migrating cancer stem cel   | PCPG | -0.206919057 |
| CDA | Mitotic_spindle             | PCPG | -0.302686246 |
| CDA | Monocyte                    | PCPG | 0.364050759  |
| CDA | Mtor_signaling_pathway      | PCPG | -0.111036484 |
| CDA | Mtorc1_signaling            | PCPG | -0.097457052 |
| CDA | Mucin type o-glycan biosy   | PCPG | -0.021977015 |
| CDA | Myc_targets_v1              | PCPG | 0.088398484  |
| CDA | Myeloid cell                | PCPG | 0.223587033  |
| CDA | N-glycan biosynthesis       | PCPG | -0.075990198 |
| CDA | Naive b cell                | PCPG | -0.039097387 |
| CDA | Naive cd4+ t cell           | PCPG | 0.364064184  |
| CDA | Naive cd8+ t cell           | PCPG | 0.014157637  |
| CDA | Natural killer cell         | PCPG | 0.226705487  |
| CDA | Natural killer t (nkt) cell | PCPG | 0.250281994  |
| CDA | Natural regulatory t (treg) | PCPG | 0.177701427  |
| CDA | Neomycin, kanamycin an      | PCPG | 0.316526319  |
| CDA | Neutrophil                  | PCPG | 0.306965864  |
| CDA | Nicotinate and nicotinami   | PCPG | -0.11931492  |
| CDA | Nitrogen metabolism         | PCPG | 0.241543481  |

|     |                            |      |              |
|-----|----------------------------|------|--------------|
| CDA | Nod_like_receptor_signal   | PCPG | 0.071884116  |
| CDA | Notch_signaling            | PCPG | 0.620373587  |
| CDA | One carbon pool by folate  | PCPG | -0.227202049 |
| CDA | Other glycan degradation   | PCPG | -0.354850757 |
| CDA | Other types of o-glycan b  | PCPG | 0.383279641  |
| CDA | Oxidative phosphorylation  | PCPG | 0.204734354  |
| CDA | P53_pathway                | PCPG | 0.468120213  |
| CDA | P53_signaling_pathway      | PCPG | 0.065290201  |
| CDA | Pantothenate and coa bios  | PCPG | 0.380999827  |
| CDA | Pentose and glucuronate i  | PCPG | -0.189895188 |
| CDA | Pentose phosphate pathwa   | PCPG | 0.021323762  |
| CDA | Pericyte                   | PCPG | 0.601885045  |
| CDA | Phenylalanine metabolism   | PCPG | 0.253300065  |
| CDA | Phenylalanine, tyrosine ar | PCPG | -0.178659376 |
| CDA | Phosphonate and phosphir   | PCPG | -0.190075035 |
| CDA | Pi3k_akt_activation        | PCPG | -0.119480906 |
| CDA | Pi3k_akt_mtor_signaling    | PCPG | -0.139235433 |
| CDA | Porphyrin and chlorophyl   | PCPG | -0.066399013 |
| CDA | Primary bile acid biosynt  | PCPG | -0.079679005 |
| CDA | Propanoate metabolism      | PCPG | -0.296554019 |
| CDA | Purine metabolism          | PCPG | 0.066209989  |
| CDA | Pyrimidine metabolism      | PCPG | -0.07983216  |
| CDA | Pyruvate metabolism        | PCPG | -0.32199333  |
| CDA | Regulation_of_autophagy    | PCPG | -0.127769737 |
| CDA | Retinol metabolism         | PCPG | 0.012384238  |
| CDA | Riboflavin metabolism      | PCPG | -0.173642491 |
| CDA | Schmahl_pdgf_signaling     | PCPG | 0.258177777  |
| CDA | Selenocompound metabol     | PCPG | -0.32400976  |
| CDA | Signaling_by_hippo         | PCPG | -0.05694278  |
| CDA | Sphingolipid metabolism    | PCPG | -0.553326623 |
| CDA | Starch and sucrose metabo  | PCPG | 0.332508126  |
| CDA | Steroid biosynthesis       | PCPG | -0.272008603 |
| CDA | Steroid hormone biosynth   | PCPG | -0.086080294 |
| CDA | Sulfur metabolism          | PCPG | -0.084258374 |
| CDA | Synthesis and degradation  | PCPG | -0.290567808 |
| CDA | T helper cell              | PCPG | 0.255180066  |
| CDA | T helper1 (th1) cell       | PCPG | 0.11379945   |
| CDA | T helper17 (th17) cell     | PCPG | 0.348019934  |
| CDA | T helper2 (th2) cell       | PCPG | 0.3520792    |
| CDA | T helper9 (th9) cell       | PCPG | 0.179634106  |
| CDA | Taurine and hypotaurine r  | PCPG | 0.35699739   |
| CDA | Terpenoid backbone biosy   | PCPG | -0.238499131 |
| CDA | Tgf_beta_signaling_pathw   | PCPG | 0.409261843  |

|      |                            |      |              |
|------|----------------------------|------|--------------|
| CDA  | Thiamine metabolism        | PCPG | -0.142748806 |
| CDA  | Tnfa_signaling_via_nfk     | PCPG | 0.19430267   |
| CDA  | Tryptophan metabolism      | PCPG | -0.079479269 |
| CDA  | Tumor endothelial cell     | PCPG | 0.089747578  |
| CDA  | Tyrosine metabolism        | PCPG | -0.010827838 |
| CDA  | Ubiquinone and other ter   | PCPG | -0.070772376 |
| CDA  | Valine, leucine and isoleu | PCPG | 0.449994126  |
| CDA  | Valine, leucine and isoleu | PCPG | -0.278895961 |
| CDA  | Vascular endothelial cell  | PCPG | 0.653956697  |
| CDA  | Vascular smooth muscle c   | PCPG | 0.612840747  |
| CDA  | Vegf_signaling_pathway     | PCPG | 0.494736396  |
| CDA  | Vitamin b6 metabolism      | PCPG | -0.253943475 |
| CDA  | Willert_wnt_signaling      | PCPG | 0.554125583  |
| CDA  | Wnt_beta_catenin_signali   | PCPG | 0.64165308   |
| UCK1 | Abnormal plasma cell       | PCPG | -0.084116264 |
| UCK1 | Activated b cell           | PCPG | -0.029988088 |
| UCK1 | Activated cd4+ t cell      | PCPG | -0.328014397 |
| UCK1 | Activated t cell           | PCPG | -0.151778123 |
| UCK1 | Alanine, aspartate and glu | PCPG | -0.279758271 |
| UCK1 | Alcala_apoptosis           | PCPG | 0.058019882  |
| UCK1 | Alpha-linolenic acid meta  | PCPG | 0.374236784  |
| UCK1 | Amino sugar and nucleoti   | PCPG | -0.176186816 |
| UCK1 | Ampk_pathway               | PCPG | 0.115683846  |
| UCK1 | Angiogenesis               | PCPG | -0.216118299 |
| UCK1 | Arachidonic acid metabol   | PCPG | 0.333432841  |
| UCK1 | Arginine and proline met   | PCPG | -0.102626157 |
| UCK1 | Arginine biosynthesis      | PCPG | -0.353602209 |
| UCK1 | Ascorbate and aldarate m   | PCPG | -0.045650413 |
| UCK1 | Atypical memory b cell     | PCPG | -0.016705658 |
| UCK1 | Axl+siglec6+ dendritic ce  | PCPG | -0.220715384 |
| UCK1 | B cell                     | PCPG | -0.29094016  |
| UCK1 | B1 cell                    | PCPG | 0.081999454  |
| UCK1 | Basal cell                 | PCPG | 0.053731115  |
| UCK1 | Beta-alanine metabolism    | PCPG | -0.144878423 |
| UCK1 | Biosynthesis of unsaturate | PCPG | 0.11512583   |
| UCK1 | Biotin metabolism          | PCPG | -0.028333025 |
| UCK1 | Butanoate metabolism       | PCPG | -0.074453005 |
| UCK1 | Caffeine metabolism        | PCPG | 0.128181876  |
| UCK1 | Cancer stem cell           | PCPG | -0.336043057 |
| UCK1 | Cancer stem-like cell      | PCPG | -0.244279189 |
| UCK1 | Cd4+ cytotoxic t cell      | PCPG | -0.184846361 |
| UCK1 | Cd4+ memory t cell         | PCPG | -0.196582612 |
| UCK1 | Cd4+ regulatory t cell     | PCPG | -0.162971072 |

|      |                              |      |              |
|------|------------------------------|------|--------------|
| UCK1 | Cd4+ t helper cell           | PCPG | -0.163744552 |
| UCK1 | Cd4+cd25+ regulatory t c     | PCPG | -0.204304295 |
| UCK1 | Cd8+ cytotoxic t cell        | PCPG | -0.067763609 |
| UCK1 | Cd8+ regulatory t cell       | PCPG | -0.195493895 |
| UCK1 | Cell_cycle                   | PCPG | -0.151586651 |
| UCK1 | Chandran_metastasis_top5     | PCPG | -0.392859613 |
| UCK1 | Citrate cycle (tca cycle)    | PCPG | -0.238268    |
| UCK1 | Cysteine and methionine r    | PCPG | -0.129743376 |
| UCK1 | Cytokine induced killer c    | PCPG | -0.023037388 |
| UCK1 | D-arginine and d-ornithin    | PCPG | 0.014489193  |
| UCK1 | D-glutamine and d-glutan     | PCPG | -0.36078591  |
| UCK1 | Dendritic cell               | PCPG | -0.253369555 |
| UCK1 | Dna_repair                   | PCPG | 0.474937276  |
| UCK1 | Dna_replication              | PCPG | 0.238946509  |
| UCK1 | Double-negative memory       | PCPG | 0.06146977   |
| UCK1 | Drug metabolism - cytoch     | PCPG | 0.163764778  |
| UCK1 | Drug metabolism - other c    | PCPG | 0.318738857  |
| UCK1 | E2f_targets                  | PCPG | 0.010294081  |
| UCK1 | Ecm_receptor_interaction     | PCPG | -0.353935625 |
| UCK1 | Effector cd4+ memory t (     | PCPG | -0.325107569 |
| UCK1 | Effector cd8+ memory t (     | PCPG | -0.29272981  |
| UCK1 | Effector memory t cell       | PCPG | -0.192425877 |
| UCK1 | Effector regulatory t (treg  | PCPG | -0.27750904  |
| UCK1 | Elvidge_hif1a_targets_up     | PCPG | -0.383054754 |
| UCK1 | Endothelial cell             | PCPG | -0.216700714 |
| UCK1 | Eosinophil                   | PCPG | -0.196392805 |
| UCK1 | Ether lipid metabolism       | PCPG | 0.092117978  |
| UCK1 | Exhausted cd4+ t cell        | PCPG | -0.351100849 |
| UCK1 | Exhausted cd8+ t cell        | PCPG | -0.335107964 |
| UCK1 | Exhausted t cell             | PCPG | -0.092998695 |
| UCK1 | Fat cell (adipocyte)         | PCPG | 0.057308257  |
| UCK1 | Fatty acid biosynthesis      | PCPG | -0.17986214  |
| UCK1 | Fatty acid degradation       | PCPG | -0.073861068 |
| UCK1 | Fatty acid elongation        | PCPG | 0.02620288   |
| UCK1 | Fibroblast                   | PCPG | -0.251315576 |
| UCK1 | Folate biosynthesis          | PCPG | 0.260675815  |
| UCK1 | Follicular b cell            | PCPG | -0.228846173 |
| UCK1 | Follicular dendritic cell    | PCPG | -0.135371819 |
| UCK1 | Follicular helper (tfh) t ce | PCPG | -0.219495947 |
| UCK1 | Follicular t cell            | PCPG | -0.162310352 |
| UCK1 | Foxp3+il-17+ t cell          | PCPG | 0.05543352   |
| UCK1 | Fructose and mannose me      | PCPG | 0.018305263  |
| UCK1 | G2m_checkpoint               | PCPG | -0.168281904 |

|      |                            |      |              |
|------|----------------------------|------|--------------|
| UCK1 | Galactose metabolism       | PCPG | -0.036042625 |
| UCK1 | Galie_tumor_stemness_ge    | PCPG | -0.169574286 |
| UCK1 | Glutathione metabolism     | PCPG | 0.09505696   |
| UCK1 | Glycerolipid metabolism    | PCPG | 0.005484882  |
| UCK1 | Glycerophospholipid met&   | PCPG | 0.41468726   |
| UCK1 | Glycine, serine and threor | PCPG | -0.090606163 |
| UCK1 | Glycolysis / gluconeogene  | PCPG | -0.056222915 |
| UCK1 | Glycosaminoglycan biosyn   | PCPG | -0.091799966 |
| UCK1 | Glycosaminoglycan biosyn   | PCPG | -0.291935722 |
| UCK1 | Glycosaminoglycan biosyn   | PCPG | -0.054441891 |
| UCK1 | Glycosaminoglycan degra    | PCPG | -0.126040328 |
| UCK1 | Glycosphingolipid biosyn   | PCPG | -0.349236181 |
| UCK1 | Glycosphingolipid biosyn   | PCPG | -0.183525523 |
| UCK1 | Glycosphingolipid biosyn   | PCPG | -0.112333832 |
| UCK1 | Glycosylphosphatidylinos   | PCPG | -0.143061177 |
| UCK1 | Glyoxylate and dicarboxy   | PCPG | -0.06397533  |
| UCK1 | Granulocyte                | PCPG | -0.225133195 |
| UCK1 | Hedgehog_signaling         | PCPG | -0.30150499  |
| UCK1 | Histidine metabolism       | PCPG | 0.00675241   |
| UCK1 | Hypoxia                    | PCPG | -0.180752908 |
| UCK1 | Il-17ralpha t cell         | PCPG | -0.200108284 |
| UCK1 | Il2_stat5_signaling        | PCPG | -0.230928249 |
| UCK1 | Il6_jak_stat3_signaling    | PCPG | -0.304114547 |
| UCK1 | Immune_checkpoints_tun     | PCPG | -0.127975769 |
| UCK1 | Immune_inhibition_cytok    | PCPG | -0.047732943 |
| UCK1 | Inositol phosphate metabo  | PCPG | -0.451148228 |
| UCK1 | Interleukin_6_signaling    | PCPG | -0.52950231  |
| UCK1 | Jaeger_metastasis_up       | PCPG | -0.311780621 |
| UCK1 | Jain_nfkb_signaling        | PCPG | 0.131899564  |
| UCK1 | Kras_signaling_up          | PCPG | -0.375577355 |
| UCK1 | Linoleic acid metabolism   | PCPG | 0.41686692   |
| UCK1 | Lipoic acid metabolism     | PCPG | 0.323698837  |
| UCK1 | Lysine degradation         | PCPG | -0.044245378 |
| UCK1 | Lysosome                   | PCPG | -0.250457189 |
| UCK1 | M1 macrophage              | PCPG | -0.304095529 |
| UCK1 | M2 macrophage              | PCPG | -0.24865307  |
| UCK1 | Mannose type o-glycan bi   | PCPG | -0.032440072 |
| UCK1 | Mapk_signaling_pathway     | PCPG | -0.421910818 |
| UCK1 | Mapk3_erk1_activation      | PCPG | -0.527950264 |
| UCK1 | Marginal zone b cell       | PCPG | -0.232637224 |
| UCK1 | Memory b cell              | PCPG | -0.069864299 |
| UCK1 | Mesenchymal cell           | PCPG | -0.168218778 |
| UCK1 | Mesenchymal stem cell      | PCPG | -0.343014832 |



|      |                                  |              |
|------|----------------------------------|--------------|
| UCK1 | Metabolism of xenobiotic:PCPG    | 0.252499984  |
| UCK1 | Migrating cancer stem cel PCPG   | -0.206046153 |
| UCK1 | Mitotic_spindle PCPG             | -0.460139007 |
| UCK1 | Monocyte PCPG                    | -0.215578214 |
| UCK1 | Mtor_signaling_pathway PCPG      | -0.377464526 |
| UCK1 | Mtorc1_signaling PCPG            | -0.354790696 |
| UCK1 | Mucin type o-glycan bios:PCPG    | -0.287968152 |
| UCK1 | Myc_targets_v1 PCPG              | 0.150312721  |
| UCK1 | Myeloid cell PCPG                | -0.318777953 |
| UCK1 | N-glycan biosynthesis PCPG       | -0.289656394 |
| UCK1 | Naive b cell PCPG                | -0.037692511 |
| UCK1 | Naive cd4+ t cell PCPG           | -0.217306077 |
| UCK1 | Naive cd8+ t cell PCPG           | -0.21600562  |
| UCK1 | Natural killer cell PCPG         | -0.243903595 |
| UCK1 | Natural killer t (nkt) cell PCPG | -0.128198712 |
| UCK1 | Natural regulatory t (treg)PCPG  | -0.227297352 |
| UCK1 | Neomycin, kanamycin an(PCPG      | -0.056178915 |
| UCK1 | Neutrophil PCPG                  | -0.213260389 |
| UCK1 | Nicotinate and nicotinami PCPG   | -0.178206912 |
| UCK1 | Nitrogen metabolism PCPG         | -0.231325143 |
| UCK1 | Nod_like_receptor_signal:PCPG    | -0.36919665  |
| UCK1 | Notch_signaling PCPG             | -0.13694779  |
| UCK1 | One carbon pool by folate PCPG   | -0.002584497 |
| UCK1 | Other glycan degradation PCPG    | -0.289773238 |
| UCK1 | Other types of o-glycan b:PCPG   | 0.096562221  |
| UCK1 | Oxidative phosphorylatior PCPG   | 0.34804179   |
| UCK1 | P53_pathway PCPG                 | -0.025508053 |
| UCK1 | P53_signaling_pathway PCPG       | -0.20558198  |
| UCK1 | Pantothenate and coa bios PCPG   | -0.097170636 |
| UCK1 | Pentose and glucuronate i:PCPG   | 0.086014249  |
| UCK1 | Pentose phosphate pathwa PCPG    | -0.03921155  |
| UCK1 | Pericyte PCPG                    | -0.164332651 |
| UCK1 | Phenylalanine metabolism PCPG    | 0.178059445  |
| UCK1 | Phenylalanine, tyrosine ar PCPG  | 0.217110047  |
| UCK1 | Phosphonate and phosphir PCPG    | 0.036971069  |
| UCK1 | Pi3k_akt_activation PCPG         | -0.464246585 |
| UCK1 | Pi3k_akt_mtor_signaling PCPG     | -0.27478143  |
| UCK1 | Porphyrin and chlorophyl PCPG    | 0.141044796  |
| UCK1 | Primary bile acid biosyntf PCPG  | 0.140541865  |
| UCK1 | Propanoate metabolism PCPG       | -0.281893153 |
| UCK1 | Purine metabolism PCPG           | -0.092523489 |
| UCK1 | Pyrimidine metabolism PCPG       | 0.241796014  |
| UCK1 | Pyruvate metabolism PCPG         | 0.007820031  |

|      |                            |      |              |
|------|----------------------------|------|--------------|
| UCK1 | Regulation_of_autophagy    | PCPG | -0.287841012 |
| UCK1 | Retinol metabolism         | PCPG | 0.208886656  |
| UCK1 | Riboflavin metabolism      | PCPG | 0.179300617  |
| UCK1 | Schmahl_pdgf_signaling     | PCPG | -0.315823203 |
| UCK1 | Selenocompound metabol     | PCPG | -0.1095879   |
| UCK1 | Signaling_by_hippo         | PCPG | -0.368689576 |
| UCK1 | Sphingolipid metabolism    | PCPG | -0.455559689 |
| UCK1 | Starch and sucrose metabo  | PCPG | 0.015431357  |
| UCK1 | Steroid biosynthesis       | PCPG | 0.027310745  |
| UCK1 | Steroid hormone biosynth   | PCPG | 0.102840395  |
| UCK1 | Sulfur metabolism          | PCPG | -0.02203039  |
| UCK1 | Synthesis and degradation  | PCPG | -0.107564935 |
| UCK1 | T helper cell              | PCPG | -0.206468137 |
| UCK1 | T helper1 (th1) cell       | PCPG | -0.153625195 |
| UCK1 | T helper17 (th17) cell     | PCPG | -0.273108182 |
| UCK1 | T helper2 (th2) cell       | PCPG | -0.151994558 |
| UCK1 | T helper9 (th9) cell       | PCPG | -0.022096989 |
| UCK1 | Taurine and hypotaurine r  | PCPG | 0.119136814  |
| UCK1 | Terpenoid backbone biosy   | PCPG | -0.045642965 |
| UCK1 | Tgf_beta_signaling_pathw   | PCPG | -0.401468303 |
| UCK1 | Thiamine metabolism        | PCPG | 0.190914443  |
| UCK1 | Tnfa_signaling_via_nfkb    | PCPG | -0.314736041 |
| UCK1 | Tryptophan metabolism      | PCPG | -0.035611302 |
| UCK1 | Tumor endothelial cell     | PCPG | 0.022739274  |
| UCK1 | Tyrosine metabolism        | PCPG | 0.159287328  |
| UCK1 | Ubiquinone and other ter   | PCPG | 0.096330282  |
| UCK1 | Valine, leucine and isoleu | PCPG | 0.042823096  |
| UCK1 | Valine, leucine and isoleu | PCPG | -0.146103977 |
| UCK1 | Vascular endothelial cell  | PCPG | -0.166024102 |
| UCK1 | Vascular smooth muscle c   | PCPG | -0.123972757 |
| UCK1 | Vegf_signaling_pathway     | PCPG | -0.008069839 |
| UCK1 | Vitamin b6 metabolism      | PCPG | 0.167762102  |
| UCK1 | Willert_wnt_signaling      | PCPG | -0.011297484 |
| UCK1 | Wnt_beta_catenin_signali   | PCPG | 0.004964147  |
| UCK2 | Abnormal plasma cell       | PCPG | 0.050765585  |
| UCK2 | Activated b cell           | PCPG | 0.216378761  |
| UCK2 | Activated cd4+ t cell      | PCPG | 0.234012737  |
| UCK2 | Activated t cell           | PCPG | 0.32993193   |
| UCK2 | Alanine, aspartate and glu | PCPG | 0.156565852  |
| UCK2 | Alcala_apoptosis           | PCPG | 0.289829757  |
| UCK2 | Alpha-linolenic acid meta  | PCPG | -0.251316468 |
| UCK2 | Amino sugar and nucleoti   | PCPG | 0.201766616  |
| UCK2 | Ampk_pathway               | PCPG | 0.00488345   |

|      |                                         |      |              |
|------|-----------------------------------------|------|--------------|
| UCK2 | Angiogenesis                            | PCPG | 0.371989922  |
| UCK2 | Arachidonic acid metabolism             | PCPG | -0.105096838 |
| UCK2 | Arginine and proline metabolism         | PCPG | 0.192866499  |
| UCK2 | Arginine biosynthesis                   | PCPG | 0.16682043   |
| UCK2 | Ascorbate and aldarate metabolism       | PCPG | -0.119039749 |
| UCK2 | Atypical memory b cell                  | PCPG | 0.132217542  |
| UCK2 | Axl+siglec6+ dendritic cell             | PCPG | 0.160370948  |
| UCK2 | B cell                                  | PCPG | 0.252152403  |
| UCK2 | B1 cell                                 | PCPG | 0.139327996  |
| UCK2 | Basal cell                              | PCPG | 0.219961229  |
| UCK2 | Beta-alanine metabolism                 | PCPG | -0.126602366 |
| UCK2 | Biosynthesis of unsaturated fatty acids | PCPG | -0.165269764 |
| UCK2 | Biotin metabolism                       | PCPG | -0.113615322 |
| UCK2 | Butanoate metabolism                    | PCPG | -0.244080573 |
| UCK2 | Caffeine metabolism                     | PCPG | 0.11691523   |
| UCK2 | Cancer stem cell                        | PCPG | 0.322561275  |
| UCK2 | Cancer stem-like cell                   | PCPG | 0.263053141  |
| UCK2 | Cd4+ cytotoxic t cell                   | PCPG | 0.240560532  |
| UCK2 | Cd4+ memory t cell                      | PCPG | 0.14998447   |
| UCK2 | Cd4+ regulatory t cell                  | PCPG | 0.261967365  |
| UCK2 | Cd4+ t helper cell                      | PCPG | 0.187794211  |
| UCK2 | Cd4+cd25+ regulatory t cell             | PCPG | 0.229915885  |
| UCK2 | Cd8+ cytotoxic t cell                   | PCPG | 0.155130311  |
| UCK2 | Cd8+ regulatory t cell                  | PCPG | 0.253908789  |
| UCK2 | Cell_cycle                              | PCPG | 0.149134781  |
| UCK2 | Chandran_metastasis_top5                | PCPG | 0.19186211   |
| UCK2 | Citrate cycle (tca cycle)               | PCPG | 0.059323516  |
| UCK2 | Cysteine and methionine metabolism      | PCPG | 0.027779947  |
| UCK2 | Cytokine induced killer cell            | PCPG | 0.142619051  |
| UCK2 | D-arginine and d-ornithine              | PCPG | 0.026893073  |
| UCK2 | D-glutamine and d-glutamate             | PCPG | -0.11536895  |
| UCK2 | Dendritic cell                          | PCPG | 0.307370172  |
| UCK2 | Dna_repair                              | PCPG | -0.18180615  |
| UCK2 | Dna_replication                         | PCPG | -0.099841341 |
| UCK2 | Double-negative memory t cell           | PCPG | 0.061889224  |
| UCK2 | Drug metabolism - cytochrome p450       | PCPG | -0.288516511 |
| UCK2 | Drug metabolism - other cytochrome p450 | PCPG | -0.045711684 |
| UCK2 | E2f_targets                             | PCPG | 0.119218123  |
| UCK2 | Ecm_receptor_interaction                | PCPG | 0.411841668  |
| UCK2 | Effector cd4+ memory t cell             | PCPG | 0.212830473  |
| UCK2 | Effector cd8+ memory t cell             | PCPG | 0.256013093  |
| UCK2 | Effector memory t cell                  | PCPG | 0.162795127  |
| UCK2 | Effector regulatory t (treg) cell       | PCPG | 0.299092528  |

|      |                              |      |              |
|------|------------------------------|------|--------------|
| UCK2 | Elvidge_hif1a_targets_up     | PCPG | 0.228530403  |
| UCK2 | Endothelial cell             | PCPG | 0.262052042  |
| UCK2 | Eosinophil                   | PCPG | 0.2761825    |
| UCK2 | Ether lipid metabolism       | PCPG | -0.098294823 |
| UCK2 | Exhausted cd4+ t cell        | PCPG | 0.367234874  |
| UCK2 | Exhausted cd8+ t cell        | PCPG | 0.373743728  |
| UCK2 | Exhausted t cell             | PCPG | 0.223724693  |
| UCK2 | Fat cell (adipocyte)         | PCPG | 0.098809462  |
| UCK2 | Fatty acid biosynthesis      | PCPG | -0.069504403 |
| UCK2 | Fatty acid degradation       | PCPG | -0.246697764 |
| UCK2 | Fatty acid elongation        | PCPG | -0.126992854 |
| UCK2 | Fibroblast                   | PCPG | 0.224206875  |
| UCK2 | Folate biosynthesis          | PCPG | -0.294472609 |
| UCK2 | Follicular b cell            | PCPG | 0.315590298  |
| UCK2 | Follicular dendritic cell    | PCPG | 0.19780994   |
| UCK2 | Follicular helper (tfh) t ce | PCPG | 0.312921688  |
| UCK2 | Follicular t cell            | PCPG | 0.284415696  |
| UCK2 | Foxp3+il-17+ t cell          | PCPG | 0.077634842  |
| UCK2 | Fructose and mannose me      | PCPG | 0.136251478  |
| UCK2 | G2m_checkpoint               | PCPG | 0.238836915  |
| UCK2 | Galactose metabolism         | PCPG | 0.215707707  |
| UCK2 | Galie_tumor_stemness_ge      | PCPG | 0.048983316  |
| UCK2 | Glutathione metabolism       | PCPG | -0.109729603 |
| UCK2 | Glycerolipid metabolism      | PCPG | -0.019586758 |
| UCK2 | Glycerophospholipid metæ     | PCPG | -0.084993887 |
| UCK2 | Glycine, serine and threor   | PCPG | -0.08745689  |
| UCK2 | Glycolysis / gluconeogene    | PCPG | 0.008463162  |
| UCK2 | Glycosaminoglycan biosy      | PCPG | 0.224939247  |
| UCK2 | Glycosaminoglycan biosy      | PCPG | 0.070498121  |
| UCK2 | Glycosaminoglycan biosy      | PCPG | 0.300783816  |
| UCK2 | Glycosaminoglycan degra      | PCPG | 0.15354806   |
| UCK2 | Glycosphingolipid biosyn     | PCPG | 0.148271889  |
| UCK2 | Glycosphingolipid biosyn     | PCPG | 0.335881358  |
| UCK2 | Glycosphingolipid biosyn     | PCPG | 0.142639557  |
| UCK2 | Glycosylphosphatidylinos     | PCPG | -0.105725492 |
| UCK2 | Glyoxylate and dicarboxy     | PCPG | -0.103661272 |
| UCK2 | Granulocyte                  | PCPG | 0.25593889   |
| UCK2 | Hedgehog_signaling           | PCPG | 0.24742004   |
| UCK2 | Histidine metabolism         | PCPG | -0.200163282 |
| UCK2 | Hypoxia                      | PCPG | 0.443461012  |
| UCK2 | Il-17ralpha t cell           | PCPG | 0.175511861  |
| UCK2 | Il2_stat5_signaling          | PCPG | 0.479784716  |
| UCK2 | Il6_jak_stat3_signaling      | PCPG | 0.469373113  |

|      |                             |      |              |
|------|-----------------------------|------|--------------|
| UCK2 | Immune_checkpoints_tur      | PCPG | 0.300383888  |
| UCK2 | Immune_inhibition_cytok     | PCPG | 0.151729337  |
| UCK2 | Inositol phosphate metabo   | PCPG | 0.170977694  |
| UCK2 | Interleukin_6_signaling     | PCPG | 0.425831971  |
| UCK2 | Jaeger_metastasis_up        | PCPG | 0.548597819  |
| UCK2 | Jain_nfkb_signaling         | PCPG | 0.057253584  |
| UCK2 | Kras_signaling_up           | PCPG | 0.344262912  |
| UCK2 | Linoleic acid metabolism    | PCPG | -0.1602665   |
| UCK2 | Lipoic acid metabolism      | PCPG | -0.415261519 |
| UCK2 | Lysine degradation          | PCPG | -0.187848241 |
| UCK2 | Lysosome                    | PCPG | 0.180824841  |
| UCK2 | M1 macrophage               | PCPG | 0.218490919  |
| UCK2 | M2 macrophage               | PCPG | 0.239164066  |
| UCK2 | Mannose type o-glycan bi    | PCPG | 0.069448843  |
| UCK2 | Mapk_signaling_pathway      | PCPG | 0.440651613  |
| UCK2 | Mapk3_erk1_activation       | PCPG | 0.359481925  |
| UCK2 | Marginal zone b cell        | PCPG | 0.224550129  |
| UCK2 | Memory b cell               | PCPG | 0.150545534  |
| UCK2 | Mesenchymal cell            | PCPG | 0.271709674  |
| UCK2 | Mesenchymal stem cell       | PCPG | 0.323475394  |
| UCK2 | Metabolism of xenobiotic    | PCPG | -0.281451476 |
| UCK2 | Migrating cancer stem cel   | PCPG | 0.101947262  |
| UCK2 | Mitotic_spindle             | PCPG | 0.298282235  |
| UCK2 | Monocyte                    | PCPG | 0.301474814  |
| UCK2 | Mtor_signaling_pathway      | PCPG | 0.00338815   |
| UCK2 | Mtorc1_signaling            | PCPG | 0.296162422  |
| UCK2 | Mucin type o-glycan biosy   | PCPG | 0.431682022  |
| UCK2 | Myc_targets_v1              | PCPG | 0.198639699  |
| UCK2 | Myeloid cell                | PCPG | 0.287631768  |
| UCK2 | N-glycan biosynthesis       | PCPG | 0.159321963  |
| UCK2 | Naive b cell                | PCPG | 0.132867896  |
| UCK2 | Naive cd4+ t cell           | PCPG | 0.147360624  |
| UCK2 | Naive cd8+ t cell           | PCPG | -0.003952735 |
| UCK2 | Natural killer cell         | PCPG | 0.323760621  |
| UCK2 | Natural killer t (nkt) cell | PCPG | 0.201402815  |
| UCK2 | Natural regulatory t (treg) | PCPG | 0.213092703  |
| UCK2 | Neomycin, kanamycin and     | PCPG | 0.240260461  |
| UCK2 | Neutrophil                  | PCPG | 0.292104391  |
| UCK2 | Nicotinate and nicotinami   | PCPG | -0.057752949 |
| UCK2 | Nitrogen metabolism         | PCPG | 0.275324375  |
| UCK2 | Nod_like_receptor_signal    | PCPG | 0.319031645  |
| UCK2 | Notch_signaling             | PCPG | 0.327647562  |
| UCK2 | One carbon pool by folate   | PCPG | 0.160872333  |

|      |                            |      |              |
|------|----------------------------|------|--------------|
| UCK2 | Other glycan degradation   | PCPG | 0.130681252  |
| UCK2 | Other types of o-glycan b  | PCPG | 0.091005817  |
| UCK2 | Oxidative phosphorylatior  | PCPG | -0.012668338 |
| UCK2 | P53_pathway                | PCPG | 0.332337509  |
| UCK2 | P53_signaling_pathway      | PCPG | 0.363798831  |
| UCK2 | Pantothenate and coa bios  | PCPG | -0.021199657 |
| UCK2 | Pentose and glucuronate i  | PCPG | -0.062813405 |
| UCK2 | Pentose phosphate pathwa   | PCPG | -0.026432003 |
| UCK2 | Pericyte                   | PCPG | 0.293428611  |
| UCK2 | Phenylalanine metabolism   | PCPG | -0.154242223 |
| UCK2 | Phenylalanine, tyrosine ar | PCPG | -0.020104652 |
| UCK2 | Phosphonate and phosphir   | PCPG | -0.154777089 |
| UCK2 | Pi3k_akt_activation        | PCPG | 0.137940783  |
| UCK2 | Pi3k_akt_mtor_signaling    | PCPG | 0.357120432  |
| UCK2 | Porphyrin and chlorophyl   | PCPG | -0.051907068 |
| UCK2 | Primary bile acid biosynt  | PCPG | -0.32062874  |
| UCK2 | Propanoate metabolism      | PCPG | -0.212240419 |
| UCK2 | Purine metabolism          | PCPG | 0.19797999   |
| UCK2 | Pyrimidine metabolism      | PCPG | 0.076056141  |
| UCK2 | Pyruvate metabolism        | PCPG | -0.118896749 |
| UCK2 | Regulation_of_autophagy    | PCPG | -0.034960334 |
| UCK2 | Retinol metabolism         | PCPG | -0.172560856 |
| UCK2 | Riboflavin metabolism      | PCPG | -0.022385878 |
| UCK2 | Schmahl_pdgf_signaling     | PCPG | 0.324933697  |
| UCK2 | Selenocompound metabol     | PCPG | -0.218631163 |
| UCK2 | Signaling_by_hippo         | PCPG | 0.233828823  |
| UCK2 | Sphingolipid metabolism    | PCPG | 0.127813913  |
| UCK2 | Starch and sucrose metabo  | PCPG | 0.143610341  |
| UCK2 | Steroid biosynthesis       | PCPG | -0.151195559 |
| UCK2 | Steroid hormone biosynth   | PCPG | -0.186808362 |
| UCK2 | Sulfur metabolism          | PCPG | -0.189239685 |
| UCK2 | Synthesis and degradation  | PCPG | -0.15918552  |
| UCK2 | T helper cell              | PCPG | 0.245115043  |
| UCK2 | T helper1 (th1) cell       | PCPG | 0.183023958  |
| UCK2 | T helper17 (th17) cell     | PCPG | 0.300961843  |
| UCK2 | T helper2 (th2) cell       | PCPG | 0.195695277  |
| UCK2 | T helper9 (th9) cell       | PCPG | 0.099337768  |
| UCK2 | Taurine and hypotaurine r  | PCPG | 0.036834616  |
| UCK2 | Terpenoid backbone biosy   | PCPG | -0.098674729 |
| UCK2 | Tgf_beta_signaling_pathw   | PCPG | 0.367550936  |
| UCK2 | Thiamine metabolism        | PCPG | -0.2903666   |
| UCK2 | Tnfa_signaling_via_nfkb    | PCPG | 0.434729911  |
| UCK2 | Tryptophan metabolism      | PCPG | -0.068107766 |

|       |                            |      |              |
|-------|----------------------------|------|--------------|
| UCK2  | Tumor endothelial cell     | PCPG | 0.182847463  |
| UCK2  | Tyrosine metabolism        | PCPG | -0.295410544 |
| UCK2  | Ubiquinone and other ter   | PCPG | -0.241405941 |
| UCK2  | Valine, leucine and isoleu | PCPG | 0.256599339  |
| UCK2  | Valine, leucine and isoleu | PCPG | -0.23390425  |
| UCK2  | Vascular endothelial cell  | PCPG | 0.247636681  |
| UCK2  | Vascular smooth muscle c   | PCPG | 0.143632431  |
| UCK2  | Vegf_signaling_pathway     | PCPG | 0.333975635  |
| UCK2  | Vitamin b6 metabolism      | PCPG | -0.161781945 |
| UCK2  | Willert_wnt_signaling      | PCPG | 0.228194924  |
| UCK2  | Wnt_beta_catenin_signali   | PCPG | 0.234320707  |
| UCKL1 | Abnormal plasma cell       | PCPG | -0.152249947 |
| UCKL1 | Activated b cell           | PCPG | -0.017708728 |
| UCKL1 | Activated cd4+ t cell      | PCPG | -0.265162338 |
| UCKL1 | Activated t cell           | PCPG | -0.213767711 |
| UCKL1 | Alanine, aspartate and glu | PCPG | 0.032215404  |
| UCKL1 | Alcala_apoptosis           | PCPG | 0.122919367  |
| UCKL1 | Alpha-linolenic acid meta  | PCPG | 0.202543082  |
| UCKL1 | Amino sugar and nucleoti   | PCPG | 0.115809059  |
| UCKL1 | Ampk_pathway               | PCPG | 0.280352225  |
| UCKL1 | Angiogenesis               | PCPG | -0.158450638 |
| UCKL1 | Arachidonic acid metabol   | PCPG | 0.18492295   |
| UCKL1 | Arginine and proline metæ  | PCPG | -0.022405693 |
| UCKL1 | Arginine biosynthesis      | PCPG | -0.200010658 |
| UCKL1 | Ascorbate and aldarate mε  | PCPG | -0.037055916 |
| UCKL1 | Atypical memory b cell     | PCPG | -0.177961483 |
| UCKL1 | Axl+siglec6+ dendritic ce  | PCPG | -0.180055206 |
| UCKL1 | B cell                     | PCPG | -0.188754327 |
| UCKL1 | B1 cell                    | PCPG | 0.054894846  |
| UCKL1 | Basal cell                 | PCPG | -0.083048458 |
| UCKL1 | Beta-alanine metabolism    | PCPG | -0.057690858 |
| UCKL1 | Biosynthesis of unsaturate | PCPG | -0.077370912 |
| UCKL1 | Biotin metabolism          | PCPG | -0.156951111 |
| UCKL1 | Butanoate metabolism       | PCPG | 0.140476126  |
| UCKL1 | Caffeine metabolism        | PCPG | -0.021143439 |
| UCKL1 | Cancer stem cell           | PCPG | -0.274770477 |
| UCKL1 | Cancer stem-like cell      | PCPG | -0.278628228 |
| UCKL1 | Cd4+ cytotoxic t cell      | PCPG | -0.244280788 |
| UCKL1 | Cd4+ memory t cell         | PCPG | -0.195198407 |
| UCKL1 | Cd4+ regulatory t cell     | PCPG | -0.262905118 |
| UCKL1 | Cd4+ t helper cell         | PCPG | -0.238388699 |
| UCKL1 | Cd4+cd25+ regulatory t c   | PCPG | -0.247409335 |
| UCKL1 | Cd8+ cytotoxic t cell      | PCPG | -0.176438968 |

|       |                              |      |              |
|-------|------------------------------|------|--------------|
| UCKL1 | Cd8+ regulatory t cell       | PCPG | -0.235076938 |
| UCKL1 | Cell_cycle                   | PCPG | 0.077510616  |
| UCKL1 | Chandran_metastasis_top5     | PCPG | -0.065112277 |
| UCKL1 | Citrate cycle (tea cycle)    | PCPG | 0.021129699  |
| UCKL1 | Cysteine and methionine r    | PCPG | -0.047066145 |
| UCKL1 | Cytokine induced killer cε   | PCPG | -0.185895543 |
| UCKL1 | D-arginine and d-ornithin    | PCPG | -0.090618438 |
| UCKL1 | D-glutamine and d-glutan     | PCPG | -0.261262468 |
| UCKL1 | Dendritic cell               | PCPG | -0.248624899 |
| UCKL1 | Dna_repair                   | PCPG | 0.31389231   |
| UCKL1 | Dna_replication              | PCPG | 0.25829742   |
| UCKL1 | Double-negative memory       | PCPG | -0.017214273 |
| UCKL1 | Drug metabolism - cytoch     | PCPG | 0.061292931  |
| UCKL1 | Drug metabolism - other (    | PCPG | 0.17921345   |
| UCKL1 | E2f_targets                  | PCPG | 0.165845512  |
| UCKL1 | Ecm_receptor_interaction     | PCPG | -0.154952002 |
| UCKL1 | Effector cd4+ memory t (     | PCPG | -0.30696966  |
| UCKL1 | Effector cd8+ memory t (     | PCPG | -0.237037206 |
| UCKL1 | Effector memory t cell       | PCPG | -0.311576924 |
| UCKL1 | Effector regulatory t (treg  | PCPG | -0.277487005 |
| UCKL1 | Elvidge_hif1a_targets_up     | PCPG | -0.210459026 |
| UCKL1 | Endothelial cell             | PCPG | -0.158921049 |
| UCKL1 | Eosinophil                   | PCPG | -0.224302564 |
| UCKL1 | Ether lipid metabolism       | PCPG | 0.153647273  |
| UCKL1 | Exhausted cd4+ t cell        | PCPG | -0.251676236 |
| UCKL1 | Exhausted cd8+ t cell        | PCPG | -0.282460363 |
| UCKL1 | Exhausted t cell             | PCPG | -0.202051051 |
| UCKL1 | Fat cell (adipocyte)         | PCPG | 0.060445424  |
| UCKL1 | Fatty acid biosynthesis      | PCPG | -0.110923305 |
| UCKL1 | Fatty acid degradation       | PCPG | 0.014507113  |
| UCKL1 | Fatty acid elongation        | PCPG | 0.02211383   |
| UCKL1 | Fibroblast                   | PCPG | -0.252710851 |
| UCKL1 | Folate biosynthesis          | PCPG | 0.014661955  |
| UCKL1 | Follicular b cell            | PCPG | -0.376243488 |
| UCKL1 | Follicular dendritic cell    | PCPG | -0.235230837 |
| UCKL1 | Follicular helper (tfh) t ce | PCPG | -0.312928949 |
| UCKL1 | Follicular t cell            | PCPG | -0.128216378 |
| UCKL1 | Foxp3+il-17+ t cell          | PCPG | -0.21512392  |
| UCKL1 | Fructose and mannose me      | PCPG | 0.218130472  |
| UCKL1 | G2m_checkpoint               | PCPG | 0.044772705  |
| UCKL1 | Galactose metabolism         | PCPG | 0.109178237  |
| UCKL1 | Galie_tumor_stemness_ge      | PCPG | -0.083646292 |
| UCKL1 | Glutathione metabolism       | PCPG | 0.078778104  |



|       |                                           |          |              |              |
|-------|-------------------------------------------|----------|--------------|--------------|
| UCKL1 | Glycerolipid metabolism                   | PCPG     | -0.117445954 |              |
| UCKL1 | Glycerophospholipid metabolism            | PCPG     | 0.13675917   |              |
| UCKL1 | Glycine, serine and threonine metabolism  | PCPG     | 0.009496028  |              |
| UCKL1 | Glycolysis / gluconeogenesis              | PCPG     | 0.040007147  |              |
| UCKL1 | Glycosaminoglycan biosynthesis            | PCPG     | -0.129255792 |              |
| UCKL1 | Glycosaminoglycan biosynthesis            | PCPG     | -0.096994088 |              |
| UCKL1 | Glycosaminoglycan biosynthesis            | PCPG     | 0.074483478  |              |
| UCKL1 | Glycosaminoglycan degradation             | PCPG     | 0.064102347  |              |
| UCKL1 | Glycosphingolipid biosynthesis            | PCPG     | -0.052404185 |              |
| UCKL1 | Glycosphingolipid biosynthesis            | PCPG     | -0.026387496 |              |
| UCKL1 | Glycosphingolipid biosynthesis            | PCPG     | 0.012699434  |              |
| UCKL1 | Glycosylphosphatidylinositol biosynthesis | PCPG     | 0.090425368  |              |
| UCKL1 | Glyoxylate and dicarboxylate metabolism   | PCPG     | 0.160046038  |              |
| UCKL1 | Granulocyte                               | PCPG     | -0.238970788 |              |
| UCKL1 | Hedgehog signaling                        | PCPG     | -0.208170604 |              |
| UCKL1 | Histidine metabolism                      | PCPG     | -0.023615451 |              |
| UCKL1 | Hypoxia                                   | PCPG     | -0.13536594  |              |
| UCKL1 | IL-17Ralpha T cell                        | PCPG     | -0.208458198 |              |
| UCKL1 | IL2 STAT5 signaling                       | PCPG     | -0.275750962 |              |
| UCKL1 | IL6 JAK STAT3 signaling                   | PCPG     | -0.338408419 |              |
| UCKL1 | Immune checkpoints                        | turnover | PCPG         | -0.238164563 |
| UCKL1 | Immune inhibition                         | cytokine | PCPG         | -0.188557015 |
| UCKL1 | Inositol phosphate metabolism             | PCPG     | -0.384394012 |              |
| UCKL1 | Interleukin_6 signaling                   | PCPG     | -0.413734552 |              |
| UCKL1 | Jaeger metastasis up                      | PCPG     | -0.20374336  |              |
| UCKL1 | Jain nfkb signaling                       | PCPG     | 0.213480732  |              |
| UCKL1 | Kras signaling up                         | PCPG     | -0.366793873 |              |
| UCKL1 | Linoleic acid metabolism                  | PCPG     | 0.197290338  |              |
| UCKL1 | Lipoic acid metabolism                    | PCPG     | 0.064219324  |              |
| UCKL1 | Lysine degradation                        | PCPG     | 0.098817525  |              |
| UCKL1 | Lysosome                                  | PCPG     | 0.040776841  |              |
| UCKL1 | M1 macrophage                             | PCPG     | -0.241268911 |              |
| UCKL1 | M2 macrophage                             | PCPG     | -0.256844448 |              |
| UCKL1 | Mannose type o-glycan biosynthesis        | PCPG     | 0.175535171  |              |
| UCKL1 | Mapk signaling pathway                    | PCPG     | -0.310105917 |              |
| UCKL1 | Mapk3 erk1 activation                     | PCPG     | -0.213193837 |              |
| UCKL1 | Marginal zone B cell                      | PCPG     | -0.305384342 |              |
| UCKL1 | Memory B cell                             | PCPG     | -0.240752281 |              |
| UCKL1 | Mesenchymal cell                          | PCPG     | -0.168357623 |              |
| UCKL1 | Mesenchymal stem cell                     | PCPG     | -0.296721827 |              |
| UCKL1 | Metabolism of xenobiotics                 | PCPG     | 0.144091457  |              |
| UCKL1 | Migrating cancer stem cell                | PCPG     | -0.21128619  |              |
| UCKL1 | Mitotic spindle                           | PCPG     | -0.204721326 |              |

|       |                                                   |      |              |
|-------|---------------------------------------------------|------|--------------|
| UCKL1 | Monocyte                                          | PCPG | -0.234305077 |
| UCKL1 | Mtor_signaling_pathway                            | PCPG | -0.029475583 |
| UCKL1 | Mtorc1_signaling                                  | PCPG | -0.147009304 |
| UCKL1 | Mucin type o-glycan biosynthesis                  | PCPG | -0.369651773 |
| UCKL1 | Myc_targets_v1                                    | PCPG | 0.287599383  |
| UCKL1 | Myeloid cell                                      | PCPG | -0.304482009 |
| UCKL1 | N-glycan biosynthesis                             | PCPG | -0.04581274  |
| UCKL1 | Naive b cell                                      | PCPG | -0.022553582 |
| UCKL1 | Naive cd4+ t cell                                 | PCPG | -0.194632979 |
| UCKL1 | Naive cd8+ t cell                                 | PCPG | -0.257002549 |
| UCKL1 | Natural killer cell                               | PCPG | -0.29520392  |
| UCKL1 | Natural killer t (nkt) cell                       | PCPG | -0.069020344 |
| UCKL1 | Natural regulatory t (treg) cell                  | PCPG | -0.281831549 |
| UCKL1 | Neomycin, kanamycin and streptomycin resistance   | PCPG | -0.003524914 |
| UCKL1 | Neutrophil                                        | PCPG | -0.228445027 |
| UCKL1 | Nicotinate and nicotinamide metabolism            | PCPG | -0.038853687 |
| UCKL1 | Nitrogen metabolism                               | PCPG | -0.188526584 |
| UCKL1 | Nod_like_receptor_signaling                       | PCPG | -0.295365459 |
| UCKL1 | Notch_signaling                                   | PCPG | -0.083427949 |
| UCKL1 | One carbon pool by folate                         | PCPG | 0.044107021  |
| UCKL1 | Other glycan degradation                          | PCPG | 0.010639034  |
| UCKL1 | Other types of o-glycan biosynthesis              | PCPG | 0.251137044  |
| UCKL1 | Oxidative phosphorylation                         | PCPG | 0.233062803  |
| UCKL1 | P53_pathway                                       | PCPG | -0.079524028 |
| UCKL1 | P53_signaling_pathway                             | PCPG | -0.109141755 |
| UCKL1 | Pantothenate and coenzyme a biosynthesis          | PCPG | 0.019707456  |
| UCKL1 | Pentose and glucuronate interconversions          | PCPG | 0.240965088  |
| UCKL1 | Pentose phosphate pathway                         | PCPG | 0.024035457  |
| UCKL1 | Pericyte                                          | PCPG | -0.217496866 |
| UCKL1 | Phenylalanine metabolism                          | PCPG | 0.029581585  |
| UCKL1 | Phenylalanine, tyrosine and tryptophan metabolism | PCPG | 0.124070476  |
| UCKL1 | Phosphonate and phosphonate metabolism            | PCPG | -0.095861708 |
| UCKL1 | Pi3k_akt_activation                               | PCPG | -0.167959563 |
| UCKL1 | Pi3k_akt_mtor_signaling                           | PCPG | -0.218525222 |
| UCKL1 | Porphyrin and chlorophyll metabolism              | PCPG | 0.191842206  |
| UCKL1 | Primary bile acid biosynthesis                    | PCPG | 0.013207212  |
| UCKL1 | Propanoate metabolism                             | PCPG | 0.004189996  |
| UCKL1 | Purine metabolism                                 | PCPG | 0.089194613  |
| UCKL1 | Pyrimidine metabolism                             | PCPG | 0.304390126  |
| UCKL1 | Pyruvate metabolism                               | PCPG | 0.01932532   |
| UCKL1 | Regulation_of_autophagy                           | PCPG | 0.044457665  |
| UCKL1 | Retinol metabolism                                | PCPG | 0.037428199  |
| UCKL1 | Riboflavin metabolism                             | PCPG | 0.085485456  |

|       |                            |      |              |
|-------|----------------------------|------|--------------|
| UCKL1 | Schmahl_pdgf_signaling     | PCPG | -0.172359148 |
| UCKL1 | Selenocompound metabol     | PCPG | -0.05108992  |
| UCKL1 | Signaling_by_hippo         | PCPG | -0.307552762 |
| UCKL1 | Sphingolipid metabolism    | PCPG | -0.148661286 |
| UCKL1 | Starch and sucrose metabo  | PCPG | 0.011055133  |
| UCKL1 | Steroid biosynthesis       | PCPG | -0.044049026 |
| UCKL1 | Steroid hormone biosynth   | PCPG | 8.56E-05     |
| UCKL1 | Sulfur metabolism          | PCPG | -0.103355495 |
| UCKL1 | Synthesis and degradation  | PCPG | 0.040759407  |
| UCKL1 | T helper cell              | PCPG | -0.228516004 |
| UCKL1 | T helper1 (th1) cell       | PCPG | -0.310595726 |
| UCKL1 | T helper17 (th17) cell     | PCPG | -0.320390372 |
| UCKL1 | T helper2 (th2) cell       | PCPG | -0.212500795 |
| UCKL1 | T helper9 (th9) cell       | PCPG | -0.156194007 |
| UCKL1 | Taurine and hypotaurine r  | PCPG | 0.221806221  |
| UCKL1 | Terpenoid backbone biosy   | PCPG | 0.13781073   |
| UCKL1 | Tgf_beta_signaling_pathw   | PCPG | -0.144799755 |
| UCKL1 | Thiamine metabolism        | PCPG | 0.111241004  |
| UCKL1 | Tnfa_signaling_via_nfb     | PCPG | -0.260737903 |
| UCKL1 | Tryptophan metabolism      | PCPG | -0.111805771 |
| UCKL1 | Tumor endothelial cell     | PCPG | 0.068943178  |
| UCKL1 | Tyrosine metabolism        | PCPG | 0.027160348  |
| UCKL1 | Ubiquinone and other ter   | PCPG | 0.271211253  |
| UCKL1 | Valine, leucine and isoleu | PCPG | 0.043308004  |
| UCKL1 | Valine, leucine and isoleu | PCPG | 0.049831344  |
| UCKL1 | Vascular endothelial cell  | PCPG | -0.107785234 |
| UCKL1 | Vascular smooth muscle c   | PCPG | -0.099701111 |
| UCKL1 | Vegf_signaling_pathway     | PCPG | 0.073556533  |
| UCKL1 | Vitamin b6 metabolism      | PCPG | 0.007304725  |
| UCKL1 | Willert_wnt_signaling      | PCPG | 0.048753956  |
| UCKL1 | Wnt_beta_catenin_signali   | PCPG | -0.015351297 |
| UPP1  | Abnormal plasma cell       | PCPG | 0.171260174  |
| UPP1  | Activated b cell           | PCPG | 0.306821138  |
| UPP1  | Activated cd4+ t cell      | PCPG | 0.342865776  |
| UPP1  | Activated t cell           | PCPG | 0.443143411  |
| UPP1  | Alanine, aspartate and glu | PCPG | -0.005421273 |
| UPP1  | Alcala_apoptosis           | PCPG | 0.392409722  |
| UPP1  | Alpha-linolenic acid meta  | PCPG | 0.188575741  |
| UPP1  | Amino sugar and nucleoti   | PCPG | 0.227259894  |
| UPP1  | Ampk_pathway               | PCPG | -0.08152876  |
| UPP1  | Angiogenesis               | PCPG | 0.316701224  |
| UPP1  | Arachidonic acid metabol   | PCPG | 0.368362124  |
| UPP1  | Arginine and proline metæ  | PCPG | 0.376126893  |

|      |                             |      |              |
|------|-----------------------------|------|--------------|
| UPP1 | Arginine biosynthesis       | PCPG | 0.179588355  |
| UPP1 | Ascorbate and aldarate me   | PCPG | 0.038839706  |
| UPP1 | Atypical memory b cell      | PCPG | 0.223107209  |
| UPP1 | Axl+siglec6+ dendritic ce   | PCPG | 0.333559447  |
| UPP1 | B cell                      | PCPG | 0.275056448  |
| UPP1 | B1 cell                     | PCPG | 0.068355436  |
| UPP1 | Basal cell                  | PCPG | 0.449884031  |
| UPP1 | Beta-alanine metabolism     | PCPG | -0.061879199 |
| UPP1 | Biosynthesis of unsaturate  | PCPG | 0.097699741  |
| UPP1 | Biotin metabolism           | PCPG | 0.010548637  |
| UPP1 | Butanoate metabolism        | PCPG | -0.238555888 |
| UPP1 | Caffeine metabolism         | PCPG | 0.027821011  |
| UPP1 | Cancer stem cell            | PCPG | 0.230209552  |
| UPP1 | Cancer stem-like cell       | PCPG | 0.087296786  |
| UPP1 | Cd4+ cytotoxic t cell       | PCPG | 0.357191147  |
| UPP1 | Cd4+ memory t cell          | PCPG | 0.408223636  |
| UPP1 | Cd4+ regulatory t cell      | PCPG | 0.359760018  |
| UPP1 | Cd4+ t helper cell          | PCPG | 0.344718162  |
| UPP1 | Cd4+cd25+ regulatory t c    | PCPG | 0.340588053  |
| UPP1 | Cd8+ cytotoxic t cell       | PCPG | 0.306238059  |
| UPP1 | Cd8+ regulatory t cell      | PCPG | 0.336434685  |
| UPP1 | Cell_cycle                  | PCPG | -0.117161491 |
| UPP1 | Chandran_metastasis_top5    | PCPG | -0.292051853 |
| UPP1 | Citrate cycle (tca cycle)   | PCPG | -0.116634857 |
| UPP1 | Cysteine and methionine r   | PCPG | 0.079041369  |
| UPP1 | Cytokine induced killer c   | PCPG | 0.363086966  |
| UPP1 | D-arginine and d-ornithin   | PCPG | 0.116100017  |
| UPP1 | D-glutamine and d-glutan    | PCPG | -0.113881182 |
| UPP1 | Dendritic cell              | PCPG | 0.437881585  |
| UPP1 | Dna_repair                  | PCPG | 0.176054127  |
| UPP1 | Dna_replication             | PCPG | -0.022309192 |
| UPP1 | Double-negative memory      | PCPG | 0.389493595  |
| UPP1 | Drug metabolism - cytoch    | PCPG | 0.170983873  |
| UPP1 | Drug metabolism - other     | PCPG | 0.346939401  |
| UPP1 | E2f_targets                 | PCPG | -0.114513108 |
| UPP1 | Ecm_receptor_interaction    | PCPG | 0.181616071  |
| UPP1 | Effector cd4+ memory t (    | PCPG | 0.281284576  |
| UPP1 | Effector cd8+ memory t (    | PCPG | 0.255613     |
| UPP1 | Effector memory t cell      | PCPG | 0.372154925  |
| UPP1 | Effector regulatory t (treg | PCPG | 0.220669179  |
| UPP1 | Elvidge_hif1a_targets_up    | PCPG | 0.018039588  |
| UPP1 | Endothelial cell            | PCPG | 0.185410207  |
| UPP1 | Eosinophil                  | PCPG | 0.466009494  |

|      |                              |      |              |
|------|------------------------------|------|--------------|
| UPP1 | Ether lipid metabolism       | PCPG | -0.059585395 |
| UPP1 | Exhausted cd4+ t cell        | PCPG | 0.295366954  |
| UPP1 | Exhausted cd8+ t cell        | PCPG | 0.414168857  |
| UPP1 | Exhausted t cell             | PCPG | 0.482711164  |
| UPP1 | Fat cell (adipocyte)         | PCPG | 0.174203771  |
| UPP1 | Fatty acid biosynthesis      | PCPG | -0.05675529  |
| UPP1 | Fatty acid degradation       | PCPG | -0.121908097 |
| UPP1 | Fatty acid elongation        | PCPG | 0.057007675  |
| UPP1 | Fibroblast                   | PCPG | 0.251977118  |
| UPP1 | Folate biosynthesis          | PCPG | 0.206259665  |
| UPP1 | Follicular b cell            | PCPG | 0.45972831   |
| UPP1 | Follicular dendritic cell    | PCPG | 0.305950559  |
| UPP1 | Follicular helper (tfh) t ce | PCPG | 0.418685657  |
| UPP1 | Follicular t cell            | PCPG | 0.447565064  |
| UPP1 | Foxp3+il-17+ t cell          | PCPG | 0.236080199  |
| UPP1 | Fructose and mannose me      | PCPG | 0.144062708  |
| UPP1 | G2m_checkpoint               | PCPG | -0.12255676  |
| UPP1 | Galactose metabolism         | PCPG | 0.269021567  |
| UPP1 | Galie_tumor_stemness_ge      | PCPG | -0.069839466 |
| UPP1 | Glutathione metabolism       | PCPG | 0.306050728  |
| UPP1 | Glycerolipid metabolism      | PCPG | 0.26932092   |
| UPP1 | Glycerophospholipid met&     | PCPG | 0.273208984  |
| UPP1 | Glycine, serine and threor   | PCPG | 0.073379361  |
| UPP1 | Glycolysis / gluconeogene    | PCPG | 0.045173349  |
| UPP1 | Glycosaminoglycan biosyn     | PCPG | 0.279903351  |
| UPP1 | Glycosaminoglycan biosyn     | PCPG | -0.086408439 |
| UPP1 | Glycosaminoglycan biosyn     | PCPG | 0.098368051  |
| UPP1 | Glycosaminoglycan degra      | PCPG | 0.23444508   |
| UPP1 | Glycosphingolipid biosyn     | PCPG | 0.006366046  |
| UPP1 | Glycosphingolipid biosyn     | PCPG | 0.228008628  |
| UPP1 | Glycosphingolipid biosyn     | PCPG | 0.077266934  |
| UPP1 | Glycosylphosphatidylinos     | PCPG | -0.222806872 |
| UPP1 | Glyoxylate and dicarboxy     | PCPG | -0.044402561 |
| UPP1 | Granulocyte                  | PCPG | 0.406754457  |
| UPP1 | Hedgehog_signaling           | PCPG | -0.155051009 |
| UPP1 | Histidine metabolism         | PCPG | 0.196753071  |
| UPP1 | Hypoxia                      | PCPG | 0.295941734  |
| UPP1 | Il-17ralpha t cell           | PCPG | 0.325730413  |
| UPP1 | Il2_stat5_signaling          | PCPG | 0.561208143  |
| UPP1 | Il6_jak_stat3_signaling      | PCPG | 0.49690342   |
| UPP1 | Immune_checkpoints_tur       | PCPG | 0.401189     |
| UPP1 | Immune_inhibition_cytok      | PCPG | 0.537474848  |
| UPP1 | Inositol phosphate metabo    | PCPG | -0.219479004 |

|      |                             |      |              |
|------|-----------------------------|------|--------------|
| UPP1 | Interleukin_6_signaling     | PCPG | 0.11899059   |
| UPP1 | Jaeger_metastasis_up        | PCPG | 0.157482649  |
| UPP1 | Jain_nfkb_signaling         | PCPG | -0.205400655 |
| UPP1 | Kras_signaling_up           | PCPG | 0.419701328  |
| UPP1 | Linoleic acid metabolism    | PCPG | 0.181131854  |
| UPP1 | Lipoic acid metabolism      | PCPG | -0.214031428 |
| UPP1 | Lysine degradation          | PCPG | -0.384493598 |
| UPP1 | Lysosome                    | PCPG | 0.198603293  |
| UPP1 | M1 macrophage               | PCPG | 0.372066572  |
| UPP1 | M2 macrophage               | PCPG | 0.348166011  |
| UPP1 | Mannose type o-glycan bi    | PCPG | -0.128030242 |
| UPP1 | Mapk_signaling_pathway      | PCPG | 0.308942223  |
| UPP1 | Mapk3_erk1_activation       | PCPG | -0.123909749 |
| UPP1 | Marginal zone b cell        | PCPG | 0.279670087  |
| UPP1 | Memory b cell               | PCPG | 0.416319273  |
| UPP1 | Mesenchymal cell            | PCPG | 0.345509947  |
| UPP1 | Mesenchymal stem cell       | PCPG | 0.265666484  |
| UPP1 | Metabolism of xenobiotic    | PCPG | 0.198771789  |
| UPP1 | Migrating cancer stem cel   | PCPG | 0.227909183  |
| UPP1 | Mitotic_spindle             | PCPG | -0.197755682 |
| UPP1 | Monocyte                    | PCPG | 0.501559308  |
| UPP1 | Mtor_signaling_pathway      | PCPG | -0.254397614 |
| UPP1 | Mtorc1_signaling            | PCPG | 0.225785331  |
| UPP1 | Mucin type o-glycan biosy   | PCPG | 0.053313105  |
| UPP1 | Myc_targets_v1              | PCPG | 0.207686682  |
| UPP1 | Myeloid cell                | PCPG | 0.351858732  |
| UPP1 | N-glycan biosynthesis       | PCPG | 0.056232287  |
| UPP1 | Naive b cell                | PCPG | 0.180490269  |
| UPP1 | Naive cd4+ t cell           | PCPG | 0.093884885  |
| UPP1 | Naive cd8+ t cell           | PCPG | 0.040650772  |
| UPP1 | Natural killer cell         | PCPG | 0.435257654  |
| UPP1 | Natural killer t (nkt) cell | PCPG | 0.280732462  |
| UPP1 | Natural regulatory t (treg) | PCPG | 0.299591654  |
| UPP1 | Neomycin, kanamycin an      | PCPG | 0.099774925  |
| UPP1 | Neutrophil                  | PCPG | 0.528549746  |
| UPP1 | Nicotinate and nicotinami   | PCPG | 0.122593536  |
| UPP1 | Nitrogen metabolism         | PCPG | 0.048881915  |
| UPP1 | Nod_like_receptor_signal    | PCPG | 0.443245276  |
| UPP1 | Notch_signaling             | PCPG | 0.153396785  |
| UPP1 | One carbon pool by folate   | PCPG | -0.075373193 |
| UPP1 | Other glycan degradation    | PCPG | 0.187791987  |
| UPP1 | Other types of o-glycan b   | PCPG | 0.089143762  |
| UPP1 | Oxidative phosphorylatior   | PCPG | 0.25620479   |

|      |                            |      |              |
|------|----------------------------|------|--------------|
| UPP1 | P53_pathway                | PCPG | 0.469779991  |
| UPP1 | P53_signaling_pathway      | PCPG | 0.243153173  |
| UPP1 | Pantothenate and coa bios  | PCPG | -0.088541589 |
| UPP1 | Pentose and glucuronate i  | PCPG | 0.031926592  |
| UPP1 | Pentose phosphate pathwa   | PCPG | 0.163336442  |
| UPP1 | Pericyte                   | PCPG | 0.309754432  |
| UPP1 | Phenylalanine metabolism   | PCPG | 0.340992393  |
| UPP1 | Phenylalanine, tyrosine ar | PCPG | 0.191944653  |
| UPP1 | Phosphonate and phosphir   | PCPG | -0.045751726 |
| UPP1 | Pi3k_akt_activation        | PCPG | -0.224441407 |
| UPP1 | Pi3k_akt_mtor_signaling    | PCPG | 0.250086306  |
| UPP1 | Porphyrin and chlorophyl   | PCPG | 0.176084481  |
| UPP1 | Primary bile acid biosynt  | PCPG | 0.132872999  |
| UPP1 | Propanoate metabolism      | PCPG | -0.336254853 |
| UPP1 | Purine metabolism          | PCPG | 0.095857842  |
| UPP1 | Pyrimidine metabolism      | PCPG | 0.113778136  |
| UPP1 | Pyruvate metabolism        | PCPG | -0.058345636 |
| UPP1 | Regulation_of_autophagy    | PCPG | -0.274823595 |
| UPP1 | Retinol metabolism         | PCPG | 0.238495031  |
| UPP1 | Riboflavin metabolism      | PCPG | 0.27565632   |
| UPP1 | Schmahl_pdgf_signaling     | PCPG | 0.046518753  |
| UPP1 | Selenocompound metabol     | PCPG | -0.282658074 |
| UPP1 | Signaling_by_hippo         | PCPG | -0.12875629  |
| UPP1 | Sphingolipid metabolism    | PCPG | -0.14974233  |
| UPP1 | Starch and sucrose metabo  | PCPG | 0.087201885  |
| UPP1 | Steroid biosynthesis       | PCPG | 0.153711013  |
| UPP1 | Steroid hormone biosynth   | PCPG | 0.251978613  |
| UPP1 | Sulfur metabolism          | PCPG | -0.097119034 |
| UPP1 | Synthesis and degradation  | PCPG | -0.027745733 |
| UPP1 | T helper cell              | PCPG | 0.366184453  |
| UPP1 | T helper1 (th1) cell       | PCPG | 0.461265564  |
| UPP1 | T helper17 (th17) cell     | PCPG | 0.39341089   |
| UPP1 | T helper2 (th2) cell       | PCPG | 0.419303223  |
| UPP1 | T helper9 (th9) cell       | PCPG | 0.3677887    |
| UPP1 | Taurine and hypotaurine r  | PCPG | 0.011412504  |
| UPP1 | Terpenoid backbone biosy   | PCPG | 0.0157366    |
| UPP1 | Tgf_beta_signaling_pathw   | PCPG | -0.05704482  |
| UPP1 | Thiamine metabolism        | PCPG | -0.012612837 |
| UPP1 | Tnfa_signaling_via_nfkb    | PCPG | 0.504664792  |
| UPP1 | Tryptophan metabolism      | PCPG | 0.182411406  |
| UPP1 | Tumor endothelial cell     | PCPG | 0.125234498  |
| UPP1 | Tyrosine metabolism        | PCPG | 0.323846627  |
| UPP1 | Ubiquinone and other ter   | PCPG | -0.016966933 |

|      |                            |      |              |
|------|----------------------------|------|--------------|
| UPP1 | Valine, leucine and isoleu | PCPG | 0.321215473  |
| UPP1 | Valine, leucine and isoleu | PCPG | -0.208289027 |
| UPP1 | Vascular endothelial cell  | PCPG | 0.207953534  |
| UPP1 | Vascular smooth muscle c   | PCPG | 0.201984917  |
| UPP1 | Vegf_signaling_pathway     | PCPG | 0.281237932  |
| UPP1 | Vitamin b6 metabolism      | PCPG | 0.020603903  |
| UPP1 | Willert_wnt_signaling      | PCPG | 0.213537583  |
| UPP1 | Wnt_beta_catenin_signali   | PCPG | 0.084504516  |
| UPP2 | Abnormal plasma cell       | PCPG | -0.143478675 |
| UPP2 | Activated b cell           | PCPG | 0.089808884  |
| UPP2 | Activated cd4+ t cell      | PCPG | 0.046381364  |
| UPP2 | Activated t cell           | PCPG | -0.07782552  |
| UPP2 | Alanine, aspartate and glu | PCPG | -0.088641796 |
| UPP2 | Alcala_apoptosis           | PCPG | -0.274083387 |
| UPP2 | Alpha-linolenic acid meta  | PCPG | -0.018429445 |
| UPP2 | Amino sugar and nucleoti   | PCPG | -0.102797971 |
| UPP2 | Ampk_pathway               | PCPG | -0.024850497 |
| UPP2 | Angiogenesis               | PCPG | 0.006793055  |
| UPP2 | Arachidonic acid metabol:  | PCPG | 0.006641105  |
| UPP2 | Arginine and proline metæ  | PCPG | -0.170963366 |
| UPP2 | Arginine biosynthesis      | PCPG | -0.076297043 |
| UPP2 | Ascorbate and aldarate mε  | PCPG | -0.149317136 |
| UPP2 | Atypical memory b cell     | PCPG | 0.023347902  |
| UPP2 | Axl+siglec6+ dendritic ce  | PCPG | -0.026643066 |
| UPP2 | B cell                     | PCPG | -0.086312777 |
| UPP2 | B1 cell                    | PCPG | 0.07077576   |
| UPP2 | Basal cell                 | PCPG | -0.054094663 |
| UPP2 | Beta-alanine metabolism    | PCPG | -0.097158919 |
| UPP2 | Biosynthesis of unsaturate | PCPG | -0.175364855 |
| UPP2 | Biotin metabolism          | PCPG | -0.260142146 |
| UPP2 | Butanoate metabolism       | PCPG | -0.134803568 |
| UPP2 | Caffeine metabolism        | PCPG | 0.055376089  |
| UPP2 | Cancer stem cell           | PCPG | 0.06737413   |
| UPP2 | Cancer stem-like cell      | PCPG | 0.153563801  |
| UPP2 | Cd4+ cytotoxic t cell      | PCPG | 0.021081713  |
| UPP2 | Cd4+ memory t cell         | PCPG | -0.048275299 |
| UPP2 | Cd4+ regulatory t cell     | PCPG | 0.004149711  |
| UPP2 | Cd4+ t helper cell         | PCPG | -0.036819716 |
| UPP2 | Cd4+cd25+ regulatory t c   | PCPG | -0.027452891 |
| UPP2 | Cd8+ cytotoxic t cell      | PCPG | -0.134512831 |
| UPP2 | Cd8+ regulatory t cell     | PCPG | 0.035392936  |
| UPP2 | Cell_cycle                 | PCPG | 0.026034945  |
| UPP2 | Chandran_metastasis_topç   | PCPG | -0.081236591 |



|      |                              |      |              |
|------|------------------------------|------|--------------|
| UPP2 | Citrate cycle (tca cycle)    | PCPG | -0.270010852 |
| UPP2 | Cysteine and methionine r    | PCPG | -0.240542597 |
| UPP2 | Cytokine induced killer c    | PCPG | -0.148474764 |
| UPP2 | D-arginine and d-ornithin    | PCPG | 0.086552798  |
| UPP2 | D-glutamine and d-glutan     | PCPG | 0.036164807  |
| UPP2 | Dendritic cell               | PCPG | 0.038575569  |
| UPP2 | Dna_repair                   | PCPG | -0.18162759  |
| UPP2 | Dna_replication              | PCPG | -0.144811186 |
| UPP2 | Double-negative memory       | PCPG | -0.084743809 |
| UPP2 | Drug metabolism - cytoch     | PCPG | 0.007864933  |
| UPP2 | Drug metabolism - other (    | PCPG | 0.02447701   |
| UPP2 | E2f_targets                  | PCPG | -0.119294361 |
| UPP2 | Ecm_receptor_interaction     | PCPG | 0.014661753  |
| UPP2 | Effector cd4+ memory t (     | PCPG | 0.021204962  |
| UPP2 | Effector cd8+ memory t (     | PCPG | -0.012832177 |
| UPP2 | Effector memory t cell       | PCPG | 0.035413509  |
| UPP2 | Effector regulatory t (treg  | PCPG | 0.040512187  |
| UPP2 | Elvidge_hif1a_targets_up     | PCPG | -0.204055395 |
| UPP2 | Endothelial cell             | PCPG | 0.012434846  |
| UPP2 | Eosinophil                   | PCPG | 0.048535452  |
| UPP2 | Ether lipid metabolism       | PCPG | -0.060961411 |
| UPP2 | Exhausted cd4+ t cell        | PCPG | -0.022761733 |
| UPP2 | Exhausted cd8+ t cell        | PCPG | -0.037349425 |
| UPP2 | Exhausted t cell             | PCPG | -0.033761174 |
| UPP2 | Fat cell (adipocyte)         | PCPG | -0.166620299 |
| UPP2 | Fatty acid biosynthesis      | PCPG | -0.109009649 |
| UPP2 | Fatty acid degradation       | PCPG | -0.124121195 |
| UPP2 | Fatty acid elongation        | PCPG | -0.075428702 |
| UPP2 | Fibroblast                   | PCPG | 0.000122187  |
| UPP2 | Folate biosynthesis          | PCPG | -0.022190588 |
| UPP2 | Follicular b cell            | PCPG | 0.033228912  |
| UPP2 | Follicular dendritic cell    | PCPG | 0.003024479  |
| UPP2 | Follicular helper (tfh) t ce | PCPG | -0.002817332 |
| UPP2 | Follicular t cell            | PCPG | -0.057664369 |
| UPP2 | Foxp3+il-17+ t cell          | PCPG | -0.153410512 |
| UPP2 | Fructose and mannose me      | PCPG | 0.007866143  |
| UPP2 | G2m_checkpoint               | PCPG | -0.054304392 |
| UPP2 | Galactose metabolism         | PCPG | -0.075223897 |
| UPP2 | Galie_tumor_stemness_ge      | PCPG | 0.062883131  |
| UPP2 | Glutathione metabolism       | PCPG | 0.021742619  |
| UPP2 | Glycerolipid metabolism      | PCPG | -0.099076978 |
| UPP2 | Glycerophospholipid met      | PCPG | 0.054346757  |
| UPP2 | Glycine, serine and threor   | PCPG | -0.084125114 |

|      |                           |      |              |
|------|---------------------------|------|--------------|
| UPP2 | Glycolysis / gluconeogene | PCPG | -0.105154549 |
| UPP2 | Glycosaminoglycan biosyn  | PCPG | 0.002703524  |
| UPP2 | Glycosaminoglycan biosyn  | PCPG | -0.099130856 |
| UPP2 | Glycosaminoglycan biosyn  | PCPG | 0.01216824   |
| UPP2 | Glycosaminoglycan degra   | PCPG | -0.164204037 |
| UPP2 | Glycosphingolipid biosyn  | PCPG | -0.016707868 |
| UPP2 | Glycosphingolipid biosyn  | PCPG | -0.079752901 |
| UPP2 | Glycosphingolipid biosyn  | PCPG | 0.008163863  |
| UPP2 | Glycosylphosphatidylinos  | PCPG | -0.113649432 |
| UPP2 | Glyoxylate and dicarboxy  | PCPG | -0.216289927 |
| UPP2 | Granulocyte               | PCPG | 0.055793319  |
| UPP2 | Hedgehog_signaling        | PCPG | 0.086308549  |
| UPP2 | Histidine metabolism      | PCPG | -0.184193231 |
| UPP2 | Hypoxia                   | PCPG | 0.019887299  |
| UPP2 | Il-17alpha t cell         | PCPG | -0.096869443 |
| UPP2 | Il2_stat5_signaling       | PCPG | -0.050293938 |
| UPP2 | Il6_jak_stat3_signaling   | PCPG | -0.032673732 |
| UPP2 | Immune_checkpoints_tur    | PCPG | -0.025173234 |
| UPP2 | Immune_inhibition_cytok   | PCPG | 0.015206334  |
| UPP2 | Inositol phosphate metabo | PCPG | 0.07883076   |
| UPP2 | Interleukin_6_signaling   | PCPG | 0.056104012  |
| UPP2 | Jaeger_metastasis_up      | PCPG | 0.017406225  |
| UPP2 | Jain_nfkb_signaling       | PCPG | -0.307375769 |
| UPP2 | Kras_signaling_up         | PCPG | 0.074032355  |
| UPP2 | Linoleic acid metabolism  | PCPG | 0.038903137  |
| UPP2 | Lipoic acid metabolism    | PCPG | -0.119547056 |
| UPP2 | Lysine degradation        | PCPG | -0.152945864 |
| UPP2 | Lysosome                  | PCPG | -0.111274897 |
| UPP2 | M1 macrophage             | PCPG | 0.024021662  |
| UPP2 | M2 macrophage             | PCPG | 0.052442181  |
| UPP2 | Mannose type o-glycan bi  | PCPG | 0.121063329  |
| UPP2 | Mapk_signaling_pathway    | PCPG | 0.113536236  |
| UPP2 | Mapk3_erk1_activation     | PCPG | 0.139653108  |
| UPP2 | Marginal zone b cell      | PCPG | -0.028022209 |
| UPP2 | Memory b cell             | PCPG | -0.030892531 |
| UPP2 | Mesenchymal cell          | PCPG | 0.004066221  |
| UPP2 | Mesenchymal stem cell     | PCPG | -0.021535749 |
| UPP2 | Metabolism of xenobiotic  | PCPG | -0.061424514 |
| UPP2 | Migrating cancer stem cel | PCPG | 0.050330184  |
| UPP2 | Mitotic_spindle           | PCPG | -0.008522712 |
| UPP2 | Monocyte                  | PCPG | -0.026649348 |
| UPP2 | Mtor_signaling_pathway    | PCPG | 0.235151911  |
| UPP2 | Mtorc1_signaling          | PCPG | -0.123977252 |

|      |                                          |      |              |
|------|------------------------------------------|------|--------------|
| UPP2 | Mucin type o-glycan biosynthesis         | PCPG | 0.181654111  |
| UPP2 | Myc_targets_v1                           | PCPG | -0.153048248 |
| UPP2 | Myeloid cell                             | PCPG | 0.02842574   |
| UPP2 | N-glycan biosynthesis                    | PCPG | -0.071646496 |
| UPP2 | Naive b cell                             | PCPG | 0.049661041  |
| UPP2 | Naive cd4+ t cell                        | PCPG | -0.066195185 |
| UPP2 | Naive cd8+ t cell                        | PCPG | -0.04473625  |
| UPP2 | Natural killer cell                      | PCPG | 0.013404499  |
| UPP2 | Natural killer t (nkt) cell              | PCPG | -0.207605173 |
| UPP2 | Natural regulatory t (treg) cell         | PCPG | 0.034095871  |
| UPP2 | Neomycin, kanamycin and streptomycin     | PCPG | 0.12414032   |
| UPP2 | Neutrophil                               | PCPG | 0.007261663  |
| UPP2 | Nicotinate and nicotinamide              | PCPG | 0.012253762  |
| UPP2 | Nitrogen metabolism                      | PCPG | 0.167623162  |
| UPP2 | Nod_like_receptor_signaling              | PCPG | 0.043022166  |
| UPP2 | Notch_signaling                          | PCPG | -0.107494641 |
| UPP2 | One carbon pool by folate                | PCPG | -0.3693758   |
| UPP2 | Other glycan degradation                 | PCPG | -0.161258883 |
| UPP2 | Other types of o-glycan biosynthesis     | PCPG | 0.018611481  |
| UPP2 | Oxidative phosphorylation                | PCPG | -0.123061987 |
| UPP2 | P53_pathway                              | PCPG | -0.173429901 |
| UPP2 | P53_signaling_pathway                    | PCPG | -0.126774701 |
| UPP2 | Pantothenate and coenzyme a biosynthesis | PCPG | -0.101332121 |
| UPP2 | Pentose and glucuronate interconversions | PCPG | -0.083770754 |
| UPP2 | Pentose phosphate pathway                | PCPG | 0.049253879  |
| UPP2 | Pericyte                                 | PCPG | 0.018615845  |
| UPP2 | Phenylalanine metabolism                 | PCPG | -0.077145297 |
| UPP2 | Phenylalanine, tyrosine and tryptophan   | PCPG | -0.039402726 |
| UPP2 | Phosphonate and phosphite                | PCPG | 0.052541487  |
| UPP2 | Pi3k_akt_activation                      | PCPG | 0.069104334  |
| UPP2 | Pi3k_akt_mtor_signaling                  | PCPG | 0.058153766  |
| UPP2 | Porphyrin and chlorophyll biosynthesis   | PCPG | -0.282700405 |
| UPP2 | Primary bile acid biosynthesis           | PCPG | 0.075048834  |
| UPP2 | Propanoate metabolism                    | PCPG | -0.174314118 |
| UPP2 | Purine metabolism                        | PCPG | -0.079509422 |
| UPP2 | Pyrimidine metabolism                    | PCPG | -0.08068702  |
| UPP2 | Pyruvate metabolism                      | PCPG | -0.36918905  |
| UPP2 | Regulation_of_autophagy                  | PCPG | 0.202408005  |
| UPP2 | Retinol metabolism                       | PCPG | -0.106246541 |
| UPP2 | Riboflavin metabolism                    | PCPG | -0.198908033 |
| UPP2 | Schmahl_pdgf_signaling                   | PCPG | 0.158354422  |
| UPP2 | Selenocompound metabolism                | PCPG | -0.115712696 |
| UPP2 | Signaling_by_hippo                       | PCPG | 0.076409001  |

|      |                            |      |              |
|------|----------------------------|------|--------------|
| UPP2 | Sphingolipid metabolism    | PCPG | -0.138872991 |
| UPP2 | Starch and sucrose metabo  | PCPG | 0.004960664  |
| UPP2 | Steroid biosynthesis       | PCPG | -0.113514298 |
| UPP2 | Steroid hormone biosynth   | PCPG | -0.027898045 |
| UPP2 | Sulfur metabolism          | PCPG | -0.133948201 |
| UPP2 | Synthesis and degradation  | PCPG | -0.0204187   |
| UPP2 | T helper cell              | PCPG | 0.022781839  |
| UPP2 | T helper1 (th1) cell       | PCPG | -0.024326924 |
| UPP2 | T helper17 (th17) cell     | PCPG | -0.020842583 |
| UPP2 | T helper2 (th2) cell       | PCPG | -0.016430533 |
| UPP2 | T helper9 (th9) cell       | PCPG | -0.031206178 |
| UPP2 | Taurine and hypotaurine r  | PCPG | -0.115953481 |
| UPP2 | Terpenoid backbone biosy   | PCPG | 0.014992334  |
| UPP2 | Tgf_beta_signaling_pathw   | PCPG | 0.014632247  |
| UPP2 | Thiamine metabolism        | PCPG | 0.003745137  |
| UPP2 | Tnfa_signaling_via_nfk     | PCPG | 0.030286959  |
| UPP2 | Tryptophan metabolism      | PCPG | -0.115493492 |
| UPP2 | Tumor endothelial cell     | PCPG | -0.172376828 |
| UPP2 | Tyrosine metabolism        | PCPG | -0.072396114 |
| UPP2 | Ubiquinone and other ter   | PCPG | -0.139763752 |
| UPP2 | Valine, leucine and isoleu | PCPG | -0.160986741 |
| UPP2 | Valine, leucine and isoleu | PCPG | -0.131443349 |
| UPP2 | Vascular endothelial cell  | PCPG | -0.033711524 |
| UPP2 | Vascular smooth muscle c   | PCPG | -0.030495314 |
| UPP2 | Vegf_signaling_pathway     | PCPG | 0.053902569  |
| UPP2 | Vitamin b6 metabolism      | PCPG | -0.063965522 |
| UPP2 | Willert_wnt_signaling      | PCPG | -0.107394537 |
| UPP2 | Wnt_beta_catenin_signali   | PCPG | 0.053880609  |
| CDA  | Abnormal plasma cell       | PRAD | 0.157670809  |
| CDA  | Activated b cell           | PRAD | 0.343913943  |
| CDA  | Activated cd4+ t cell      | PRAD | 0.206491082  |
| CDA  | Activated t cell           | PRAD | 0.197991153  |
| CDA  | Alanine, aspartate and glu | PRAD | -0.222826116 |
| CDA  | Alcala_apoptosis           | PRAD | -0.003596236 |
| CDA  | Alpha-linolenic acid meta  | PRAD | -0.044420818 |
| CDA  | Amino sugar and nucleoti   | PRAD | -0.13715927  |
| CDA  | Ampk_pathway               | PRAD | -0.282012624 |
| CDA  | Angiogenesis               | PRAD | 0.517908719  |
| CDA  | Arachidonic acid metabo    | PRAD | 0.251697528  |
| CDA  | Arginine and proline met   | PRAD | 0.031654785  |
| CDA  | Arginine biosynthesis      | PRAD | 0.073873986  |
| CDA  | Ascorbate and aldarate m   | PRAD | -0.207180023 |
| CDA  | Atypical memory b cell     | PRAD | 0.136772941  |

|     |                             |      |              |
|-----|-----------------------------|------|--------------|
| CDA | Axl+siglec6+ dendritic ce   | PRAD | 0.47773658   |
| CDA | B cell                      | PRAD | 0.307309163  |
| CDA | B1 cell                     | PRAD | 0.191204964  |
| CDA | Basal cell                  | PRAD | 0.305415338  |
| CDA | Beta-alanine metabolism     | PRAD | 0.023287141  |
| CDA | Biosynthesis of unsaturate  | PRAD | -0.142320728 |
| CDA | Biotin metabolism           | PRAD | -0.262666638 |
| CDA | Butanoate metabolism        | PRAD | -0.160705617 |
| CDA | Caffeine metabolism         | PRAD | 0.123473514  |
| CDA | Cancer stem cell            | PRAD | 0.410648351  |
| CDA | Cancer stem-like cell       | PRAD | 0.308823044  |
| CDA | Cd4+ cytotoxic t cell       | PRAD | 0.429490265  |
| CDA | Cd4+ memory t cell          | PRAD | 0.174099609  |
| CDA | Cd4+ regulatory t cell      | PRAD | 0.280743225  |
| CDA | Cd4+ t helper cell          | PRAD | 0.266934914  |
| CDA | Cd4+cd25+ regulatory t c    | PRAD | 0.263071007  |
| CDA | Cd8+ cytotoxic t cell       | PRAD | 0.17878468   |
| CDA | Cd8+ regulatory t cell      | PRAD | 0.13974791   |
| CDA | Cell_cycle                  | PRAD | -0.302057704 |
| CDA | Chandran_metastasis_top     | PRAD | -0.38050189  |
| CDA | Citrate cycle (tca cycle)   | PRAD | -0.234344293 |
| CDA | Cysteine and methionine r   | PRAD | -0.288541355 |
| CDA | Cytokine induced killer ce  | PRAD | 0.377331317  |
| CDA | D-arginine and d-ornithin   | PRAD | -0.052587469 |
| CDA | D-glutamine and d-glutan    | PRAD | -0.254167716 |
| CDA | Dendritic cell              | PRAD | 0.411420512  |
| CDA | Dna_repair                  | PRAD | -0.062646563 |
| CDA | Dna_replication             | PRAD | -0.186934393 |
| CDA | Double-negative memory      | PRAD | 0.204909552  |
| CDA | Drug metabolism - cytoch    | PRAD | 0.152013375  |
| CDA | Drug metabolism - other     | PRAD | 0.061667286  |
| CDA | E2f_targets                 | PRAD | -0.253411887 |
| CDA | Ecm_receptor_interaction    | PRAD | 0.455328935  |
| CDA | Effector cd4+ memory t (    | PRAD | 0.176795707  |
| CDA | Effector cd8+ memory t (    | PRAD | 0.380799508  |
| CDA | Effector memory t cell      | PRAD | 0.239426084  |
| CDA | Effector regulatory t (treg | PRAD | 0.274972586  |
| CDA | Elvidge_hif1a_targets_up    | PRAD | -0.230804445 |
| CDA | Endothelial cell            | PRAD | 0.610394003  |
| CDA | Eosinophil                  | PRAD | 0.324069166  |
| CDA | Ether lipid metabolism      | PRAD | 0.10229395   |
| CDA | Exhausted cd4+ t cell       | PRAD | 0.367546367  |
| CDA | Exhausted cd8+ t cell       | PRAD | 0.382980649  |

|     |                              |      |              |
|-----|------------------------------|------|--------------|
| CDA | Exhausted t cell             | PRAD | 0.238822011  |
| CDA | Fat cell (adipocyte)         | PRAD | 0.094109191  |
| CDA | Fatty acid biosynthesis      | PRAD | 0.012598268  |
| CDA | Fatty acid degradation       | PRAD | -0.021493048 |
| CDA | Fatty acid elongation        | PRAD | -0.048681204 |
| CDA | Fibroblast                   | PRAD | 0.577722136  |
| CDA | Folate biosynthesis          | PRAD | 0.018473341  |
| CDA | Follicular b cell            | PRAD | 0.259196337  |
| CDA | Follicular dendritic cell    | PRAD | 0.13165912   |
| CDA | Follicular helper (tfh) t ce | PRAD | 0.264277967  |
| CDA | Follicular t cell            | PRAD | 0.192293994  |
| CDA | Foxp3+il-17+ t cell          | PRAD | -0.010726639 |
| CDA | Fructose and mannose me      | PRAD | -0.087823207 |
| CDA | G2m_checkpoint               | PRAD | -0.320191048 |
| CDA | Galactose metabolism         | PRAD | 0.07759281   |
| CDA | Galie_tumor_stemness_ge      | PRAD | 0.34982985   |
| CDA | Glutathione metabolism       | PRAD | 0.142532971  |
| CDA | Glycerolipid metabolism      | PRAD | 0.105881163  |
| CDA | Glycerophospholipid metæ     | PRAD | 0.26440703   |
| CDA | Glycine, serine and threor   | PRAD | -0.049485069 |
| CDA | Glycolysis / gluconeogene    | PRAD | -0.091447684 |
| CDA | Glycosaminoglycan biosy      | PRAD | 0.469655327  |
| CDA | Glycosaminoglycan biosy      | PRAD | 0.057726302  |
| CDA | Glycosaminoglycan biosy      | PRAD | 0.334825084  |
| CDA | Glycosaminoglycan degra      | PRAD | 0.062356062  |
| CDA | Glycosphingolipid biosyn     | PRAD | 0.225489162  |
| CDA | Glycosphingolipid biosyn     | PRAD | 0.112390558  |
| CDA | Glycosphingolipid biosyn     | PRAD | 0.050024067  |
| CDA | Glycosylphosphatidylinos     | PRAD | -0.396395584 |
| CDA | Glyoxylate and dicarboxy     | PRAD | -0.29322445  |
| CDA | Granulocyte                  | PRAD | 0.308933061  |
| CDA | Hedgehog_signaling           | PRAD | 0.177386916  |
| CDA | Histidine metabolism         | PRAD | 0.18210482   |
| CDA | Hypoxia                      | PRAD | 0.263267318  |
| CDA | Il-17alpha t cell            | PRAD | 0.214388052  |
| CDA | Il2_stat5_signaling          | PRAD | 0.326814977  |
| CDA | Il6_jak_stat3_signaling      | PRAD | 0.231143753  |
| CDA | Immune_checkpoints_turr      | PRAD | 0.193736058  |
| CDA | Immune_inhibition_cytok      | PRAD | 0.344886383  |
| CDA | Inositol phosphate metabo    | PRAD | -0.142686958 |
| CDA | Interleukin_6_signaling      | PRAD | 0.023366866  |
| CDA | Jaeger_metastasis_up         | PRAD | 0.107235613  |
| CDA | Jain_nfkb_signaling          | PRAD | -0.289290458 |

|     |                             |      |              |
|-----|-----------------------------|------|--------------|
| CDA | Kras_signaling_up           | PRAD | 0.360203681  |
| CDA | Linoleic acid metabolism    | PRAD | -0.085901409 |
| CDA | Lipoic acid metabolism      | PRAD | -0.1668617   |
| CDA | Lysine degradation          | PRAD | -0.381363588 |
| CDA | Lysosome                    | PRAD | -0.016824105 |
| CDA | M1 macrophage               | PRAD | 0.301181849  |
| CDA | M2 macrophage               | PRAD | 0.346145823  |
| CDA | Mannose type o-glycan bi    | PRAD | -0.275553898 |
| CDA | Mapk_signaling_pathway      | PRAD | 0.274855298  |
| CDA | Mapk3_erk1_activation       | PRAD | 0.005699611  |
| CDA | Marginal zone b cell        | PRAD | 0.20972358   |
| CDA | Memory b cell               | PRAD | 0.183322106  |
| CDA | Mesenchymal cell            | PRAD | 0.605652786  |
| CDA | Mesenchymal stem cell       | PRAD | 0.517474038  |
| CDA | Metabolism of xenobiotic    | PRAD | 0.141563028  |
| CDA | Migrating cancer stem cel   | PRAD | -0.165778454 |
| CDA | Mitotic_spindle             | PRAD | -0.249578214 |
| CDA | Monocyte                    | PRAD | 0.455874044  |
| CDA | Mtor_signaling_pathway      | PRAD | -0.163474539 |
| CDA | Mtorc1_signaling            | PRAD | -0.253805674 |
| CDA | Mucin type o-glycan biosy   | PRAD | -0.169959072 |
| CDA | Myc_targets_v1              | PRAD | -0.226421335 |
| CDA | Myeloid cell                | PRAD | 0.347731332  |
| CDA | N-glycan biosynthesis       | PRAD | -0.321791828 |
| CDA | Naive b cell                | PRAD | 0.050551941  |
| CDA | Naive cd4+ t cell           | PRAD | 0.299183078  |
| CDA | Naive cd8+ t cell           | PRAD | 0.147489498  |
| CDA | Natural killer cell         | PRAD | 0.313044109  |
| CDA | Natural killer t (nkt) cell | PRAD | 0.051252371  |
| CDA | Natural regulatory t (treg) | PRAD | 0.125824833  |
| CDA | Neomycin, kanamycin and     | PRAD | 0.103865555  |
| CDA | Neutrophil                  | PRAD | 0.345778576  |
| CDA | Nicotinate and nicotinami   | PRAD | 0.125617936  |
| CDA | Nitrogen metabolism         | PRAD | 0.014340228  |
| CDA | Nod_like_receptor_signal    | PRAD | 0.098201977  |
| CDA | Notch_signaling             | PRAD | 0.229925322  |
| CDA | One carbon pool by folate   | PRAD | -0.337286479 |
| CDA | Other glycan degradation    | PRAD | -0.209780892 |
| CDA | Other types of o-glycan b   | PRAD | -0.020314307 |
| CDA | Oxidative phosphorylatior   | PRAD | 0.120269622  |
| CDA | P53_pathway                 | PRAD | 0.223748441  |
| CDA | P53_signaling_pathway       | PRAD | -0.127874785 |
| CDA | Pantothenate and coa bios   | PRAD | 0.019307533  |

|     |                            |      |              |
|-----|----------------------------|------|--------------|
| CDA | Pentose and glucuronate i  | PRAD | -0.216477259 |
| CDA | Pentose phosphate pathwa   | PRAD | -0.093617579 |
| CDA | Pericyte                   | PRAD | 0.60640212   |
| CDA | Phenylalanine metabolism   | PRAD | 0.254258362  |
| CDA | Phenylalanine, tyrosine ar | PRAD | -0.030358278 |
| CDA | Phosphonate and phosphir   | PRAD | -0.057588384 |
| CDA | Pi3k_akt_activation        | PRAD | 0.144172687  |
| CDA | Pi3k_akt_mtor_signaling    | PRAD | -0.138966378 |
| CDA | Porphyrin and chlorophyl   | PRAD | -0.158454789 |
| CDA | Primary bile acid biosynt  | PRAD | 0.162761434  |
| CDA | Propanoate metabolism      | PRAD | -0.329898005 |
| CDA | Purine metabolism          | PRAD | -0.08995166  |
| CDA | Pyrimidine metabolism      | PRAD | -0.215984626 |
| CDA | Pyruvate metabolism        | PRAD | -0.198267022 |
| CDA | Regulation_of_autophagy    | PRAD | -0.271878481 |
| CDA | Retinol metabolism         | PRAD | 0.117221412  |
| CDA | Riboflavin metabolism      | PRAD | -0.099321613 |
| CDA | Schmahl_pdgf_signaling     | PRAD | 0.061330272  |
| CDA | Selenocompound metabol     | PRAD | -0.30867163  |
| CDA | Signaling_by_hippo         | PRAD | -0.234488289 |
| CDA | Sphingolipid metabolism    | PRAD | -0.387545836 |
| CDA | Starch and sucrose metabo  | PRAD | -0.02452635  |
| CDA | Steroid biosynthesis       | PRAD | -0.182513259 |
| CDA | Steroid hormone biosynth   | PRAD | 0.06396145   |
| CDA | Sulfur metabolism          | PRAD | -0.256374146 |
| CDA | Synthesis and degradation  | PRAD | -0.017335145 |
| CDA | T helper cell              | PRAD | 0.374037646  |
| CDA | T helper1 (th1) cell       | PRAD | 0.216715183  |
| CDA | T helper17 (th17) cell     | PRAD | 0.245925889  |
| CDA | T helper2 (th2) cell       | PRAD | 0.35071044   |
| CDA | T helper9 (th9) cell       | PRAD | 0.277854398  |
| CDA | Taurine and hypotaurine r  | PRAD | 0.125099305  |
| CDA | Terpenoid backbone biosy   | PRAD | -0.329073324 |
| CDA | Tgf_beta_signaling_pathw   | PRAD | 0.178074533  |
| CDA | Thiamine metabolism        | PRAD | 0.054184297  |
| CDA | Tnfa_signaling_via_nfk     | PRAD | 0.135888641  |
| CDA | Tryptophan metabolism      | PRAD | 0.103275552  |
| CDA | Tumor endothelial cell     | PRAD | 0.043362247  |
| CDA | Tyrosine metabolism        | PRAD | 0.180161485  |
| CDA | Ubiquinone and other ter   | PRAD | -0.186678406 |
| CDA | Valine, leucine and isoleu | PRAD | 0.12437462   |
| CDA | Valine, leucine and isoleu | PRAD | -0.194567352 |
| CDA | Vascular endothelial cell  | PRAD | 0.674925606  |



|      |                            |      |              |
|------|----------------------------|------|--------------|
| CDA  | Vascular smooth muscle c   | PRAD | 0.489737005  |
| CDA  | Vegf_signaling_pathway     | PRAD | 0.307414036  |
| CDA  | Vitamin b6 metabolism      | PRAD | -0.165356148 |
| CDA  | Willert_wnt_signaling      | PRAD | 0.02084247   |
| CDA  | Wnt_beta_catenin_signali   | PRAD | 0.150972221  |
| UCK1 | Abnormal plasma cell       | PRAD | -0.090493226 |
| UCK1 | Activated b cell           | PRAD | -0.033307408 |
| UCK1 | Activated cd4+ t cell      | PRAD | -0.297821186 |
| UCK1 | Activated t cell           | PRAD | -0.158532942 |
| UCK1 | Alanine, aspartate and glu | PRAD | -0.244982041 |
| UCK1 | Alcala_apoptosis           | PRAD | 0.188585805  |
| UCK1 | Alpha-linolenic acid meta  | PRAD | -0.012467189 |
| UCK1 | Amino sugar and nucleoti   | PRAD | -0.038087447 |
| UCK1 | Ampk_pathway               | PRAD | 0.002961047  |
| UCK1 | Angiogenesis               | PRAD | -0.096536256 |
| UCK1 | Arachidonic acid metabol   | PRAD | 0.10175642   |
| UCK1 | Arginine and proline met&  | PRAD | -0.031554531 |
| UCK1 | Arginine biosynthesis      | PRAD | -0.087373643 |
| UCK1 | Ascorbate and aldarate m&  | PRAD | -0.074773061 |
| UCK1 | Atypical memory b cell     | PRAD | -0.08779115  |
| UCK1 | Axl+siglec6+ dendritic ce  | PRAD | -0.198083863 |
| UCK1 | B cell                     | PRAD | -0.23903941  |
| UCK1 | B1 cell                    | PRAD | -0.04412618  |
| UCK1 | Basal cell                 | PRAD | 0.030882405  |
| UCK1 | Beta-alanine metabolism    | PRAD | -0.165048759 |
| UCK1 | Biosynthesis of unsaturate | PRAD | 0.108538563  |
| UCK1 | Biotin metabolism          | PRAD | -0.046007699 |
| UCK1 | Butanoate metabolism       | PRAD | -0.118491314 |
| UCK1 | Caffeine metabolism        | PRAD | -0.05845495  |
| UCK1 | Cancer stem cell           | PRAD | -0.309976562 |
| UCK1 | Cancer stem-like cell      | PRAD | -0.225649345 |
| UCK1 | Cd4+ cytotoxic t cell      | PRAD | -0.181626464 |
| UCK1 | Cd4+ memory t cell         | PRAD | -0.155826048 |
| UCK1 | Cd4+ regulatory t cell     | PRAD | -0.130877296 |
| UCK1 | Cd4+ t helper cell         | PRAD | -0.168336622 |
| UCK1 | Cd4+cd25+ regulatory t c   | PRAD | -0.175366125 |
| UCK1 | Cd8+ cytotoxic t cell      | PRAD | -0.085527647 |
| UCK1 | Cd8+ regulatory t cell     | PRAD | -0.174643436 |
| UCK1 | Cell_cycle                 | PRAD | -0.066415004 |
| UCK1 | Chandran_metastasis_top5   | PRAD | -0.247254041 |
| UCK1 | Citrate cycle (tca cycle)  | PRAD | -0.055525604 |
| UCK1 | Cysteine and methionine r  | PRAD | -0.023610516 |
| UCK1 | Cytokine induced killer c& | PRAD | -0.056221715 |

|      |                              |      |              |
|------|------------------------------|------|--------------|
| UCK1 | D-arginine and d-ornithin    | PRAD | 0.077184585  |
| UCK1 | D-glutamine and d-glutan     | PRAD | -0.356245619 |
| UCK1 | Dendritic cell               | PRAD | -0.19693213  |
| UCK1 | Dna_repair                   | PRAD | 0.498076869  |
| UCK1 | Dna_replication              | PRAD | 0.23220765   |
| UCK1 | Double-negative memory       | PRAD | 0.035933445  |
| UCK1 | Drug metabolism - cytoch     | PRAD | 0.137844762  |
| UCK1 | Drug metabolism - other      | PRAD | 0.289023084  |
| UCK1 | E2f_targets                  | PRAD | 0.038434047  |
| UCK1 | Ecm_receptor_interaction     | PRAD | -0.244726324 |
| UCK1 | Effector cd4+ memory t       | PRAD | -0.288045773 |
| UCK1 | Effector cd8+ memory t       | PRAD | -0.273201947 |
| UCK1 | Effector memory t cell       | PRAD | -0.234232791 |
| UCK1 | Effector regulatory t (treg  | PRAD | -0.252886477 |
| UCK1 | Elvidge_hif1a_targets_up     | PRAD | -0.251071293 |
| UCK1 | Endothelial cell             | PRAD | -0.267988985 |
| UCK1 | Eosinophil                   | PRAD | -0.191652579 |
| UCK1 | Ether lipid metabolism       | PRAD | -0.104855302 |
| UCK1 | Exhausted cd4+ t cell        | PRAD | -0.299510983 |
| UCK1 | Exhausted cd8+ t cell        | PRAD | -0.188353709 |
| UCK1 | Exhausted t cell             | PRAD | -0.057300887 |
| UCK1 | Fat cell (adipocyte)         | PRAD | 0.015125486  |
| UCK1 | Fatty acid biosynthesis      | PRAD | -0.144912691 |
| UCK1 | Fatty acid degradation       | PRAD | -0.123351462 |
| UCK1 | Fatty acid elongation        | PRAD | 0.300930213  |
| UCK1 | Fibroblast                   | PRAD | -0.197217371 |
| UCK1 | Folate biosynthesis          | PRAD | 0.207567456  |
| UCK1 | Follicular b cell            | PRAD | -0.24353163  |
| UCK1 | Follicular dendritic cell    | PRAD | -0.208277056 |
| UCK1 | Follicular helper (tfh) t ce | PRAD | -0.194481267 |
| UCK1 | Follicular t cell            | PRAD | 0.046373876  |
| UCK1 | Foxp3+il-17+ t cell          | PRAD | -0.065933653 |
| UCK1 | Fructose and mannose me      | PRAD | 0.18603139   |
| UCK1 | G2m_checkpoint               | PRAD | -0.121320616 |
| UCK1 | Galactose metabolism         | PRAD | 0.087668337  |
| UCK1 | Galie_tumor_stemness_ge      | PRAD | -0.351121094 |
| UCK1 | Glutathione metabolism       | PRAD | 0.190629905  |
| UCK1 | Glycerolipid metabolism      | PRAD | 0.131452591  |
| UCK1 | Glycerophospholipid metæ     | PRAD | 0.260139668  |
| UCK1 | Glycine, serine and threor   | PRAD | 0.132501904  |
| UCK1 | Glycolysis / gluconeogene    | PRAD | 0.052003063  |
| UCK1 | Glycosaminoglycan biosy      | PRAD | 0.101644688  |
| UCK1 | Glycosaminoglycan biosy      | PRAD | -0.234383707 |

|      |                           |      |              |
|------|---------------------------|------|--------------|
| UCK1 | Glycosaminoglycan biosyn  | PRAD | 0.120081646  |
| UCK1 | Glycosaminoglycan degra   | PRAD | -0.143682415 |
| UCK1 | Glycosphingolipid biosyn  | PRAD | -0.085288207 |
| UCK1 | Glycosphingolipid biosyn  | PRAD | -0.11797063  |
| UCK1 | Glycosphingolipid biosyn  | PRAD | -0.150779276 |
| UCK1 | Glycosylphosphatidylinos  | PRAD | -0.053378745 |
| UCK1 | Glyoxylate and dicarboxy  | PRAD | 0.016207954  |
| UCK1 | Granulocyte               | PRAD | -0.1894102   |
| UCK1 | Hedgehog_signaling        | PRAD | -0.447845247 |
| UCK1 | Histidine metabolism      | PRAD | -0.006539458 |
| UCK1 | Hypoxia                   | PRAD | -0.169999238 |
| UCK1 | Il-17alpha t cell         | PRAD | -0.167217982 |
| UCK1 | Il2_stat5_signaling       | PRAD | -0.269271241 |
| UCK1 | Il6_jak_stat3_signaling   | PRAD | -0.313186911 |
| UCK1 | Immune_checkpoints_tunr   | PRAD | -0.172170204 |
| UCK1 | Immune_inhibition_cytok   | PRAD | -0.053007495 |
| UCK1 | Inositol phosphate metabo | PRAD | -0.489162422 |
| UCK1 | Interleukin_6_signaling   | PRAD | -0.57464784  |
| UCK1 | Jaeger_metastasis_up      | PRAD | -0.098965638 |
| UCK1 | Jain_nfkb_signaling       | PRAD | -0.053687302 |
| UCK1 | Kras_signaling_up         | PRAD | -0.374328515 |
| UCK1 | Linoleic acid metabolism  | PRAD | 0.132445847  |
| UCK1 | Lipoic acid metabolism    | PRAD | 0.227095713  |
| UCK1 | Lysine degradation        | PRAD | -0.300682541 |
| UCK1 | Lysosome                  | PRAD | -0.076831466 |
| UCK1 | M1 macrophage             | PRAD | -0.272620479 |
| UCK1 | M2 macrophage             | PRAD | -0.213617379 |
| UCK1 | Mannose type o-glycan bi  | PRAD | -0.062605202 |
| UCK1 | Mapk_signaling_pathway    | PRAD | -0.350646211 |
| UCK1 | Mapk3_erk1_activation     | PRAD | -0.559744863 |
| UCK1 | Marginal zone b cell      | PRAD | -0.251206228 |
| UCK1 | Memory b cell             | PRAD | -0.197862571 |
| UCK1 | Mesenchymal cell          | PRAD | -0.066233838 |
| UCK1 | Mesenchymal stem cell     | PRAD | -0.27777436  |
| UCK1 | Metabolism of xenobiotic  | PRAD | 0.196461322  |
| UCK1 | Migrating cancer stem cel | PRAD | -0.228731998 |
| UCK1 | Mitotic_spindle           | PRAD | -0.463989288 |
| UCK1 | Monocyte                  | PRAD | -0.122522941 |
| UCK1 | Mtor_signaling_pathway    | PRAD | -0.321881656 |
| UCK1 | Mtorc1_signaling          | PRAD | -0.046675901 |
| UCK1 | Mucin type o-glycan biosy | PRAD | -0.600139117 |
| UCK1 | Myc_targets_v1            | PRAD | 0.179824815  |
| UCK1 | Myeloid cell              | PRAD | -0.276855337 |

|      |                             |      |              |
|------|-----------------------------|------|--------------|
| UCK1 | N-glycan biosynthesis       | PRAD | -0.201496809 |
| UCK1 | Naive b cell                | PRAD | -0.100719597 |
| UCK1 | Naive cd4+ t cell           | PRAD | -0.393653495 |
| UCK1 | Naive cd8+ t cell           | PRAD | -0.353249859 |
| UCK1 | Natural killer cell         | PRAD | -0.230837172 |
| UCK1 | Natural killer t (nkt) cell | PRAD | 0.071058152  |
| UCK1 | Natural regulatory t (treg) | PRAD | -0.268183873 |
| UCK1 | Neomycin, kanamycin and     | PRAD | -0.127648623 |
| UCK1 | Neutrophil                  | PRAD | -0.230809269 |
| UCK1 | Nicotinate and nicotinami   | PRAD | -0.134633906 |
| UCK1 | Nitrogen metabolism         | PRAD | -0.193100452 |
| UCK1 | Nod_like_receptor_signal    | PRAD | -0.290819227 |
| UCK1 | Notch_signaling             | PRAD | -0.136357312 |
| UCK1 | One carbon pool by folate   | PRAD | 0.020569838  |
| UCK1 | Other glycan degradation    | PRAD | -0.090354668 |
| UCK1 | Other types of o-glycan b   | PRAD | 0.108118264  |
| UCK1 | Oxidative phosphorylatio    | PRAD | 0.514428541  |
| UCK1 | P53_pathway                 | PRAD | 0.078545483  |
| UCK1 | P53_signaling_pathway       | PRAD | -0.164035344 |
| UCK1 | Pantothenate and coa bios   | PRAD | -0.155000573 |
| UCK1 | Pentose and glucuronate i   | PRAD | -0.077011272 |
| UCK1 | Pentose phosphate pathwa    | PRAD | 0.138562857  |
| UCK1 | Pericyte                    | PRAD | -0.099755224 |
| UCK1 | Phenylalanine metabolism    | PRAD | 0.185979772  |
| UCK1 | Phenylalanine, tyrosine ar  | PRAD | 0.114700998  |
| UCK1 | Phosphonate and phosphir    | PRAD | -0.141869642 |
| UCK1 | Pi3k_akt_activation         | PRAD | -0.421941197 |
| UCK1 | Pi3k_akt_mtor_signaling     | PRAD | -0.1531314   |
| UCK1 | Porphyrin and chlorophyl    | PRAD | 0.16188121   |
| UCK1 | Primary bile acid biosynt   | PRAD | 0.040747862  |
| UCK1 | Propanoate metabolism       | PRAD | -0.364889155 |
| UCK1 | Purine metabolism           | PRAD | 0.086907261  |
| UCK1 | Pyrimidine metabolism       | PRAD | 0.298858327  |
| UCK1 | Pyruvate metabolism         | PRAD | 0.026567393  |
| UCK1 | Regulation_of_autophagy     | PRAD | -0.047838123 |
| UCK1 | Retinol metabolism          | PRAD | 0.115256112  |
| UCK1 | Riboflavin metabolism       | PRAD | 0.180225558  |
| UCK1 | Schmahl_pdgf_signaling      | PRAD | -0.427253232 |
| UCK1 | Selenocompound metabol      | PRAD | -0.416460909 |
| UCK1 | Signaling_by_hippo          | PRAD | -0.55757613  |
| UCK1 | Sphingolipid metabolism     | PRAD | -0.371533783 |
| UCK1 | Starch and sucrose metabo   | PRAD | -0.219782361 |
| UCK1 | Steroid biosynthesis        | PRAD | 0.097205403  |

|      |                            |      |              |
|------|----------------------------|------|--------------|
| UCK1 | Steroid hormone biosynth   | PRAD | 0.163673813  |
| UCK1 | Sulfur metabolism          | PRAD | -0.143388451 |
| UCK1 | Synthesis and degradation  | PRAD | -0.113589575 |
| UCK1 | T helper cell              | PRAD | -0.227006414 |
| UCK1 | T helper1 (th1) cell       | PRAD | -0.163291164 |
| UCK1 | T helper17 (th17) cell     | PRAD | -0.298144935 |
| UCK1 | T helper2 (th2) cell       | PRAD | -0.185699125 |
| UCK1 | T helper9 (th9) cell       | PRAD | -0.105474171 |
| UCK1 | Taurine and hypotaurine r  | PRAD | 0.093200327  |
| UCK1 | Terpenoid backbone biosy   | PRAD | -0.025597449 |
| UCK1 | Tgf_beta_signaling_pathw   | PRAD | -0.45796008  |
| UCK1 | Thiamine metabolism        | PRAD | 0.326857344  |
| UCK1 | Tnfa_signaling_via_nfkb    | PRAD | -0.264103078 |
| UCK1 | Tryptophan metabolism      | PRAD | -0.15522051  |
| UCK1 | Tumor endothelial cell     | PRAD | 0.073545334  |
| UCK1 | Tyrosine metabolism        | PRAD | 0.155598407  |
| UCK1 | Ubiquinone and other terq  | PRAD | 0.098713821  |
| UCK1 | Valine, leucine and isoleu | PRAD | 0.097285029  |
| UCK1 | Valine, leucine and isoleu | PRAD | -0.218482957 |
| UCK1 | Vascular endothelial cell  | PRAD | -0.099518661 |
| UCK1 | Vascular smooth muscle c   | PRAD | -0.122438729 |
| UCK1 | Vegf_signaling_pathway     | PRAD | -0.087105182 |
| UCK1 | Vitamin b6 metabolism      | PRAD | 0.072603927  |
| UCK1 | Willert_wnt_signaling      | PRAD | -0.134264913 |
| UCK1 | Wnt_beta_catenin_signali   | PRAD | -0.217710278 |
| UCK2 | Abnormal plasma cell       | PRAD | -0.422567983 |
| UCK2 | Activated b cell           | PRAD | -0.163348594 |
| UCK2 | Activated cd4+ t cell      | PRAD | -0.320930057 |
| UCK2 | Activated t cell           | PRAD | -0.068789814 |
| UCK2 | Alanine, aspartate and glu | PRAD | 0.310687182  |
| UCK2 | Alcala_apoptosis           | PRAD | 0.27434959   |
| UCK2 | Alpha-linolenic acid meta  | PRAD | -0.131690882 |
| UCK2 | Amino sugar and nucleoti   | PRAD | 0.175677739  |
| UCK2 | Ampk_pathway               | PRAD | 0.388057338  |
| UCK2 | Angiogenesis               | PRAD | -0.131694507 |
| UCK2 | Arachidonic acid metabol:  | PRAD | -0.19305738  |
| UCK2 | Arginine and proline metæ  | PRAD | -0.094722494 |
| UCK2 | Arginine biosynthesis      | PRAD | -0.015855823 |
| UCK2 | Ascorbate and aldarate mc  | PRAD | 0.217587679  |
| UCK2 | Atypical memory b cell     | PRAD | -0.237892033 |
| UCK2 | Axl+siglec6+ dendritic ce  | PRAD | -0.292212643 |
| UCK2 | B cell                     | PRAD | -0.237334654 |
| UCK2 | B1 cell                    | PRAD | -0.070681279 |

|      |                             |      |              |
|------|-----------------------------|------|--------------|
| UCK2 | Basal cell                  | PRAD | -0.41075982  |
| UCK2 | Beta-alanine metabolism     | PRAD | -0.222740575 |
| UCK2 | Biosynthesis of unsaturate  | PRAD | 0.043453089  |
| UCK2 | Biotin metabolism           | PRAD | 0.22855214   |
| UCK2 | Butanoate metabolism        | PRAD | -0.0286298   |
| UCK2 | Caffeine metabolism         | PRAD | -0.386215741 |
| UCK2 | Cancer stem cell            | PRAD | -0.388462219 |
| UCK2 | Cancer stem-like cell       | PRAD | -0.356824348 |
| UCK2 | Cd4+ cytotoxic t cell       | PRAD | -0.336133553 |
| UCK2 | Cd4+ memory t cell          | PRAD | -0.164953726 |
| UCK2 | Cd4+ regulatory t cell      | PRAD | -0.162721927 |
| UCK2 | Cd4+ t helper cell          | PRAD | -0.213238631 |
| UCK2 | Cd4+cd25+ regulatory t c    | PRAD | -0.20147498  |
| UCK2 | Cd8+ cytotoxic t cell       | PRAD | -0.180065514 |
| UCK2 | Cd8+ regulatory t cell      | PRAD | -0.120967377 |
| UCK2 | Cell_cycle                  | PRAD | 0.399164304  |
| UCK2 | Chandran_metastasis_top5    | PRAD | 0.35848154   |
| UCK2 | Citrate cycle (tca cycle)   | PRAD | 0.270384399  |
| UCK2 | Cysteine and methionine r   | PRAD | 0.270988735  |
| UCK2 | Cytokine induced killer c   | PRAD | -0.330717084 |
| UCK2 | D-arginine and d-ornithin   | PRAD | 0.028653135  |
| UCK2 | D-glutamine and d-glutan    | PRAD | 0.049656984  |
| UCK2 | Dendritic cell              | PRAD | -0.306405828 |
| UCK2 | Dna_repair                  | PRAD | 0.436795149  |
| UCK2 | Dna_replication             | PRAD | 0.357486862  |
| UCK2 | Double-negative memory      | PRAD | -0.109369303 |
| UCK2 | Drug metabolism - cytoch    | PRAD | -0.096627769 |
| UCK2 | Drug metabolism - other (   | PRAD | 0.26355847   |
| UCK2 | E2f_targets                 | PRAD | 0.427839958  |
| UCK2 | Ecm_receptor_interaction    | PRAD | -0.288989309 |
| UCK2 | Effector cd4+ memory t (    | PRAD | -0.213872768 |
| UCK2 | Effector cd8+ memory t (    | PRAD | -0.333252923 |
| UCK2 | Effector memory t cell      | PRAD | -0.214494902 |
| UCK2 | Effector regulatory t (treg | PRAD | -0.185969545 |
| UCK2 | Elvidge_hif1a_targets_up    | PRAD | 0.205013791  |
| UCK2 | Endothelial cell            | PRAD | -0.320311904 |
| UCK2 | Eosinophil                  | PRAD | -0.230683914 |
| UCK2 | Ether lipid metabolism      | PRAD | -0.224694133 |
| UCK2 | Exhausted cd4+ t cell       | PRAD | -0.358083749 |
| UCK2 | Exhausted cd8+ t cell       | PRAD | -0.347029837 |
| UCK2 | Exhausted t cell            | PRAD | -0.136588153 |
| UCK2 | Fat cell (adipocyte)        | PRAD | -0.223228023 |
| UCK2 | Fatty acid biosynthesis     | PRAD | 0.066251603  |

|      |                              |      |              |
|------|------------------------------|------|--------------|
| UCK2 | Fatty acid degradation       | PRAD | -0.183870156 |
| UCK2 | Fatty acid elongation        | PRAD | 0.136345185  |
| UCK2 | Fibroblast                   | PRAD | -0.340098203 |
| UCK2 | Folate biosynthesis          | PRAD | 0.24744248   |
| UCK2 | Follicular b cell            | PRAD | -0.219940154 |
| UCK2 | Follicular dendritic cell    | PRAD | -0.124619552 |
| UCK2 | Follicular helper (tfh) t ce | PRAD | -0.300010276 |
| UCK2 | Follicular t cell            | PRAD | 0.005495012  |
| UCK2 | Foxp3+il-17+ t cell          | PRAD | -0.093837682 |
| UCK2 | Fructose and mannose me      | PRAD | 0.205738687  |
| UCK2 | G2m_checkpoint               | PRAD | 0.375236372  |
| UCK2 | Galactose metabolism         | PRAD | 0.012117085  |
| UCK2 | Galie_tumor_stemness_ge      | PRAD | -0.331112279 |
| UCK2 | Glutathione metabolism       | PRAD | -0.096640896 |
| UCK2 | Glycerolipid metabolism      | PRAD | 0.069874738  |
| UCK2 | Glycerophospholipid metæ     | PRAD | -0.177136743 |
| UCK2 | Glycine, serine and threor   | PRAD | 0.019417271  |
| UCK2 | Glycolysis / gluconeogene    | PRAD | 0.098677826  |
| UCK2 | Glycosaminoglycan biosy1     | PRAD | -0.119700939 |
| UCK2 | Glycosaminoglycan biosy1     | PRAD | -0.278901428 |
| UCK2 | Glycosaminoglycan biosy1     | PRAD | -0.070966222 |
| UCK2 | Glycosaminoglycan degra      | PRAD | -0.063949263 |
| UCK2 | Glycosphingolipid biosyn1    | PRAD | -0.369467389 |
| UCK2 | Glycosphingolipid biosyn1    | PRAD | -0.24892798  |
| UCK2 | Glycosphingolipid biosyn1    | PRAD | -0.31310564  |
| UCK2 | Glycosylphosphatidylinos:    | PRAD | 0.213914386  |
| UCK2 | Glyoxylate and dicarboxy     | PRAD | 0.330693926  |
| UCK2 | Granulocyte                  | PRAD | -0.273826294 |
| UCK2 | Hedgehog_signaling           | PRAD | -0.18961621  |
| UCK2 | Histidine metabolism         | PRAD | -0.314337807 |
| UCK2 | Hypoxia                      | PRAD | -0.237409733 |
| UCK2 | Il-17ralpha t cell           | PRAD | -0.198024686 |
| UCK2 | Il2_stat5_signaling          | PRAD | -0.193096204 |
| UCK2 | Il6_jak_stat3_signaling      | PRAD | -0.21042465  |
| UCK2 | Immune_checkpoints_tur       | PRAD | -0.204286236 |
| UCK2 | Immune_inhibition_cytok      | PRAD | -0.206180606 |
| UCK2 | Inositol phosphate metabo    | PRAD | -0.381325243 |
| UCK2 | Interleukin_6_signaling      | PRAD | -0.231585547 |
| UCK2 | Jaeger_metastasis_up         | PRAD | 0.227182472  |
| UCK2 | Jain_nfkb_signaling          | PRAD | 0.503027031  |
| UCK2 | Kras_signaling_up            | PRAD | -0.264154209 |
| UCK2 | Linoleic acid metabolism     | PRAD | 0.045776574  |
| UCK2 | Lipoic acid metabolism       | PRAD | 0.097605962  |

|      |                             |      |              |
|------|-----------------------------|------|--------------|
| UCK2 | Lysine degradation          | PRAD | 0.019577213  |
| UCK2 | Lysosome                    | PRAD | -0.24360644  |
| UCK2 | M1 macrophage               | PRAD | -0.187957332 |
| UCK2 | M2 macrophage               | PRAD | -0.200117041 |
| UCK2 | Mannose type o-glycan bi    | PRAD | 0.083743322  |
| UCK2 | Mapk_signaling_pathway      | PRAD | -0.356639518 |
| UCK2 | Mapk3_erk1_activation       | PRAD | -0.135794612 |
| UCK2 | Marginal zone b cell        | PRAD | -0.183835547 |
| UCK2 | Memory b cell               | PRAD | -0.2074452   |
| UCK2 | Mesenchymal cell            | PRAD | -0.327796915 |
| UCK2 | Mesenchymal stem cell       | PRAD | -0.40744708  |
| UCK2 | Metabolism of xenobiotic    | PRAD | -0.052250266 |
| UCK2 | Migrating cancer stem cel   | PRAD | -0.10133501  |
| UCK2 | Mitotic_spindle             | PRAD | 0.061831452  |
| UCK2 | Monocyte                    | PRAD | -0.293028895 |
| UCK2 | Mtor_signaling_pathway      | PRAD | 0.012329041  |
| UCK2 | Mtorc1_signaling            | PRAD | 0.322261722  |
| UCK2 | Mucin type o-glycan biosy   | PRAD | -0.085206853 |
| UCK2 | Myc_targets_v1              | PRAD | 0.620874834  |
| UCK2 | Myeloid cell                | PRAD | -0.31302584  |
| UCK2 | N-glycan biosynthesis       | PRAD | 0.221324814  |
| UCK2 | Naive b cell                | PRAD | -0.277914052 |
| UCK2 | Naive cd4+ t cell           | PRAD | -0.267880415 |
| UCK2 | Naive cd8+ t cell           | PRAD | -0.313133511 |
| UCK2 | Natural killer cell         | PRAD | -0.281174852 |
| UCK2 | Natural killer t (nkt) cell | PRAD | 0.196755901  |
| UCK2 | Natural regulatory t (treg) | PRAD | -0.198843461 |
| UCK2 | Neomycin, kanamycin and     | PRAD | -0.154547891 |
| UCK2 | Neutrophil                  | PRAD | -0.283993834 |
| UCK2 | Nicotinate and nicotinami   | PRAD | -0.248755475 |
| UCK2 | Nitrogen metabolism         | PRAD | -0.059521362 |
| UCK2 | Nod_like_receptor_signal    | PRAD | -0.140210222 |
| UCK2 | Notch_signaling             | PRAD | -0.24258733  |
| UCK2 | One carbon pool by folate   | PRAD | 0.378491398  |
| UCK2 | Other glycan degradation    | PRAD | -0.100844348 |
| UCK2 | Other types of o-glycan b   | PRAD | 0.245079656  |
| UCK2 | Oxidative phosphorylatio    | PRAD | 0.220932485  |
| UCK2 | P53_pathway                 | PRAD | -0.145455112 |
| UCK2 | P53_signaling_pathway       | PRAD | 0.19254998   |
| UCK2 | Pantothenate and coa bios   | PRAD | -0.140534032 |
| UCK2 | Pentose and glucuronate i   | PRAD | 0.336354429  |
| UCK2 | Pentose phosphate pathwa    | PRAD | 0.324676608  |
| UCK2 | Pericyte                    | PRAD | -0.398518296 |



|      |                            |      |              |
|------|----------------------------|------|--------------|
| UCK2 | Phenylalanine metabolism   | PRAD | -0.222231737 |
| UCK2 | Phenylalanine, tyrosine ar | PRAD | -0.093992711 |
| UCK2 | Phosphonate and phosphir   | PRAD | -0.104390543 |
| UCK2 | Pi3k_akt_activation        | PRAD | -0.271061896 |
| UCK2 | Pi3k_akt_mtor_signaling    | PRAD | 0.127983079  |
| UCK2 | Porphyrin and chlorophyl   | PRAD | 0.281348713  |
| UCK2 | Primary bile acid biosynt  | PRAD | 0.035098153  |
| UCK2 | Propanoate metabolism      | PRAD | -0.047490512 |
| UCK2 | Purine metabolism          | PRAD | 0.512180279  |
| UCK2 | Pyrimidine metabolism      | PRAD | 0.51450907   |
| UCK2 | Pyruvate metabolism        | PRAD | 0.127168711  |
| UCK2 | Regulation_of_autophagy    | PRAD | 0.0766635    |
| UCK2 | Retinol metabolism         | PRAD | -0.056638176 |
| UCK2 | Riboflavin metabolism      | PRAD | 0.136242822  |
| UCK2 | Schmahl_pdgf_signaling     | PRAD | -0.251532205 |
| UCK2 | Selenocompound metabol     | PRAD | 0.209615238  |
| UCK2 | Signaling_by_hippo         | PRAD | -0.079299846 |
| UCK2 | Sphingolipid metabolism    | PRAD | -0.150122376 |
| UCK2 | Starch and sucrose metabo  | PRAD | -0.205342907 |
| UCK2 | Steroid biosynthesis       | PRAD | -0.029200936 |
| UCK2 | Steroid hormone biosynth   | PRAD | 0.158692276  |
| UCK2 | Sulfur metabolism          | PRAD | 0.168636928  |
| UCK2 | Synthesis and degradation  | PRAD | -0.211809409 |
| UCK2 | T helper cell              | PRAD | -0.296706699 |
| UCK2 | T helper1 (th1) cell       | PRAD | -0.205745931 |
| UCK2 | T helper17 (th17) cell     | PRAD | -0.333536418 |
| UCK2 | T helper2 (th2) cell       | PRAD | -0.294697614 |
| UCK2 | T helper9 (th9) cell       | PRAD | -0.278894761 |
| UCK2 | Taurine and hypotaurine r  | PRAD | -0.079671486 |
| UCK2 | Terpenoid backbone biosy   | PRAD | 0.098195512  |
| UCK2 | Tgf_beta_signaling_pathw   | PRAD | -0.239706847 |
| UCK2 | Thiamine metabolism        | PRAD | 0.232853174  |
| UCK2 | Tnfa_signaling_via_nfkb    | PRAD | -0.152576744 |
| UCK2 | Tryptophan metabolism      | PRAD | -0.179745589 |
| UCK2 | Tumor endothelial cell     | PRAD | 0.031727242  |
| UCK2 | Tyrosine metabolism        | PRAD | -0.086440974 |
| UCK2 | Ubiquinone and other ter   | PRAD | 0.134949056  |
| UCK2 | Valine, leucine and isoleu | PRAD | 0.087783558  |
| UCK2 | Valine, leucine and isoleu | PRAD | -0.099272645 |
| UCK2 | Vascular endothelial cell  | PRAD | -0.169238571 |
| UCK2 | Vascular smooth muscle c   | PRAD | -0.296165388 |
| UCK2 | Vegf_signaling_pathway     | PRAD | -0.275630759 |
| UCK2 | Vitamin b6 metabolism      | PRAD | 0.218034929  |

|       |                            |      |              |
|-------|----------------------------|------|--------------|
| UCK2  | Willert_wnt_signaling      | PRAD | 0.192891658  |
| UCK2  | Wnt_beta_catenin_signali   | PRAD | -0.057401608 |
| UCKL1 | Abnormal plasma cell       | PRAD | -0.267768219 |
| UCKL1 | Activated b cell           | PRAD | -0.133541946 |
| UCKL1 | Activated cd4+ t cell      | PRAD | -0.275027134 |
| UCKL1 | Activated t cell           | PRAD | -0.123651476 |
| UCKL1 | Alanine, aspartate and glu | PRAD | -0.190297631 |
| UCKL1 | Alcala_apoptosis           | PRAD | 0.130946267  |
| UCKL1 | Alpha-linolenic acid meta  | PRAD | -0.136756051 |
| UCKL1 | Amino sugar and nucleoti   | PRAD | -0.132025281 |
| UCKL1 | Ampk_pathway               | PRAD | 0.189810702  |
| UCKL1 | Angiogenesis               | PRAD | -0.180401299 |
| UCKL1 | Arachidonic acid metabol   | PRAD | -0.114127575 |
| UCKL1 | Arginine and proline metæ  | PRAD | -0.287323666 |
| UCKL1 | Arginine biosynthesis      | PRAD | -0.198253878 |
| UCKL1 | Ascorbate and aldarate me  | PRAD | -0.181460886 |
| UCKL1 | Atypical memory b cell     | PRAD | -0.175371153 |
| UCKL1 | Axl+siglec6+ dendritic ce  | PRAD | -0.325999252 |
| UCKL1 | B cell                     | PRAD | -0.27406669  |
| UCKL1 | B1 cell                    | PRAD | -0.094403815 |
| UCKL1 | Basal cell                 | PRAD | -0.065296459 |
| UCKL1 | Beta-alanine metabolism    | PRAD | -0.367982322 |
| UCKL1 | Biosynthesis of unsaturate | PRAD | -0.192779622 |
| UCKL1 | Biotin metabolism          | PRAD | -0.057278417 |
| UCKL1 | Butanoate metabolism       | PRAD | -0.27707083  |
| UCKL1 | Caffeine metabolism        | PRAD | -0.284099142 |
| UCKL1 | Cancer stem cell           | PRAD | -0.325080198 |
| UCKL1 | Cancer stem-like cell      | PRAD | -0.367887464 |
| UCKL1 | Cd4+ cytotoxic t cell      | PRAD | -0.247536127 |
| UCKL1 | Cd4+ memory t cell         | PRAD | -0.142731239 |
| UCKL1 | Cd4+ regulatory t cell     | PRAD | -0.15154034  |
| UCKL1 | Cd4+ t helper cell         | PRAD | -0.192609172 |
| UCKL1 | Cd4+cd25+ regulatory t c   | PRAD | -0.187573238 |
| UCKL1 | Cd8+ cytotoxic t cell      | PRAD | -0.150428922 |
| UCKL1 | Cd8+ regulatory t cell     | PRAD | -0.163856744 |
| UCKL1 | Cell_cycle                 | PRAD | 0.016224518  |
| UCKL1 | Chandran_metastasis_topç   | PRAD | -0.010831611 |
| UCKL1 | Citrate cycle (tca cycle)  | PRAD | -0.074460094 |
| UCKL1 | Cysteine and methionine r  | PRAD | -0.093219619 |
| UCKL1 | Cytokine induced killer cæ | PRAD | -0.236020727 |
| UCKL1 | D-arginine and d-ornithin  | PRAD | -0.069682041 |
| UCKL1 | D-glutamine and d-glutan   | PRAD | -0.272751453 |
| UCKL1 | Dendritic cell             | PRAD | -0.215956298 |

|       |                              |      |              |
|-------|------------------------------|------|--------------|
| UCKL1 | Dna_repair                   | PRAD | 0.373835165  |
| UCKL1 | Dna_replication              | PRAD | 0.244042534  |
| UCKL1 | Double-negative memory       | PRAD | -0.020133841 |
| UCKL1 | Drug metabolism - cytoch     | PRAD | -0.236864707 |
| UCKL1 | Drug metabolism - other      | PRAD | 0.031382979  |
| UCKL1 | E2f_targets                  | PRAD | 0.146993151  |
| UCKL1 | Ecm_receptor_interaction     | PRAD | -0.20501396  |
| UCKL1 | Effector cd4+ memory t       | PRAD | -0.232789108 |
| UCKL1 | Effector cd8+ memory t       | PRAD | -0.23648607  |
| UCKL1 | Effector memory t cell       | PRAD | -0.230785966 |
| UCKL1 | Effector regulatory t (treg) | PRAD | -0.206707286 |
| UCKL1 | Elvidge_hif1a_targets_up     | PRAD | -0.274244557 |
| UCKL1 | Endothelial cell             | PRAD | -0.331826123 |
| UCKL1 | Eosinophil                   | PRAD | -0.180707398 |
| UCKL1 | Ether lipid metabolism       | PRAD | -0.105853758 |
| UCKL1 | Exhausted cd4+ t cell        | PRAD | -0.321208597 |
| UCKL1 | Exhausted cd8+ t cell        | PRAD | -0.205259403 |
| UCKL1 | Exhausted t cell             | PRAD | -0.105025906 |
| UCKL1 | Fat cell (adipocyte)         | PRAD | -0.190770897 |
| UCKL1 | Fatty acid biosynthesis      | PRAD | -0.042586018 |
| UCKL1 | Fatty acid degradation       | PRAD | -0.293321137 |
| UCKL1 | Fatty acid elongation        | PRAD | 0.023491728  |
| UCKL1 | Fibroblast                   | PRAD | -0.273145592 |
| UCKL1 | Folate biosynthesis          | PRAD | -0.062063162 |
| UCKL1 | Follicular b cell            | PRAD | -0.205431053 |
| UCKL1 | Follicular dendritic cell    | PRAD | -0.236361764 |
| UCKL1 | Follicular helper (tfh) t ce | PRAD | -0.252377139 |
| UCKL1 | Follicular t cell            | PRAD | 0.072766926  |
| UCKL1 | Foxp3+il-17+ t cell          | PRAD | -0.116236508 |
| UCKL1 | Fructose and mannose me      | PRAD | 0.083647033  |
| UCKL1 | G2m_checkpoint               | PRAD | 0.030215227  |
| UCKL1 | Galactose metabolism         | PRAD | -0.082958461 |
| UCKL1 | Galie_tumor_stemness_ge      | PRAD | -0.34990236  |
| UCKL1 | Glutathione metabolism       | PRAD | -0.18838946  |
| UCKL1 | Glycerolipid metabolism      | PRAD | -0.062716275 |
| UCKL1 | Glycerophospholipid metæ     | PRAD | 0.090730766  |
| UCKL1 | Glycine, serine and threor   | PRAD | -0.131495472 |
| UCKL1 | Glycolysis / gluconeogene    | PRAD | -0.168897203 |
| UCKL1 | Glycosaminoglycan biosy1     | PRAD | -0.114015564 |
| UCKL1 | Glycosaminoglycan biosy1     | PRAD | -0.242816668 |
| UCKL1 | Glycosaminoglycan biosy1     | PRAD | -0.124999974 |
| UCKL1 | Glycosaminoglycan degra      | PRAD | -0.207263681 |
| UCKL1 | Glycosphingolipid biosyn1    | PRAD | -0.284805636 |

|       |                           |      |              |
|-------|---------------------------|------|--------------|
| UCKL1 | Glycosphingolipid biosyn  | PRAD | -0.260346102 |
| UCKL1 | Glycosphingolipid biosyn  | PRAD | -0.258219932 |
| UCKL1 | Glycosylphosphatidylinos  | PRAD | -0.018793009 |
| UCKL1 | Glyoxylate and dicarboxy  | PRAD | 0.055615506  |
| UCKL1 | Granulocyte               | PRAD | -0.251532892 |
| UCKL1 | Hedgehog_signaling        | PRAD | -0.271157177 |
| UCKL1 | Histidine metabolism      | PRAD | -0.258726556 |
| UCKL1 | Hypoxia                   | PRAD | -0.206501137 |
| UCKL1 | Il-17alpha t cell         | PRAD | -0.179835875 |
| UCKL1 | Il2_stat5_signaling       | PRAD | -0.323683874 |
| UCKL1 | Il6_jak_stat3_signaling   | PRAD | -0.282984134 |
| UCKL1 | Immune_checkpoints_tur    | PRAD | -0.069523546 |
| UCKL1 | Immune_inhibition_cytok   | PRAD | -0.100974624 |
| UCKL1 | Inositol phosphate metabo | PRAD | -0.386114437 |
| UCKL1 | Interleukin_6_signaling   | PRAD | -0.421333236 |
| UCKL1 | Jaeger_metastasis_up      | PRAD | -0.1569182   |
| UCKL1 | Jain_nfkb_signaling       | PRAD | 0.043609967  |
| UCKL1 | Kras_signaling_up         | PRAD | -0.387154626 |
| UCKL1 | Linoleic acid metabolism  | PRAD | 0.028421451  |
| UCKL1 | Lipoic acid metabolism    | PRAD | 0.094061341  |
| UCKL1 | Lysine degradation        | PRAD | -0.252947828 |
| UCKL1 | Lysosome                  | PRAD | -0.272025854 |
| UCKL1 | M1 macrophage             | PRAD | -0.203137232 |
| UCKL1 | M2 macrophage             | PRAD | -0.221125702 |
| UCKL1 | Mannose type o-glycan bi  | PRAD | 0.112009134  |
| UCKL1 | Mapk_signaling_pathway    | PRAD | -0.340082709 |
| UCKL1 | Mapk3_erk1_activation     | PRAD | -0.369970942 |
| UCKL1 | Marginal zone b cell      | PRAD | -0.241000934 |
| UCKL1 | Memory b cell             | PRAD | -0.262162931 |
| UCKL1 | Mesenchymal cell          | PRAD | -0.209350115 |
| UCKL1 | Mesenchymal stem cell     | PRAD | -0.310613654 |
| UCKL1 | Metabolism of xenobiotic  | PRAD | -0.166729948 |
| UCKL1 | Migrating cancer stem cel | PRAD | -0.195312935 |
| UCKL1 | Mitotic_spindle           | PRAD | -0.185721256 |
| UCKL1 | Monocyte                  | PRAD | -0.198373312 |
| UCKL1 | Mtor_signaling_pathway    | PRAD | -0.261873921 |
| UCKL1 | Mtorc1_signaling          | PRAD | -0.154921653 |
| UCKL1 | Mucin type o-glycan biosy | PRAD | -0.460128521 |
| UCKL1 | Myc_targets_v1            | PRAD | 0.224983933  |
| UCKL1 | Myeloid cell              | PRAD | -0.277212118 |
| UCKL1 | N-glycan biosynthesis     | PRAD | -0.184744837 |
| UCKL1 | Naive b cell              | PRAD | -0.228898023 |
| UCKL1 | Naive cd4+ t cell         | PRAD | -0.320252699 |

|       |                             |      |              |
|-------|-----------------------------|------|--------------|
| UCKL1 | Naive cd8+ t cell           | PRAD | -0.245864873 |
| UCKL1 | Natural killer cell         | PRAD | -0.244985279 |
| UCKL1 | Natural killer t (nkt) cell | PRAD | 0.183233027  |
| UCKL1 | Natural regulatory t (treg) | PRAD | -0.209686141 |
| UCKL1 | Neomycin, kanamycin and     | PRAD | -0.255667524 |
| UCKL1 | Neutrophil                  | PRAD | -0.280414839 |
| UCKL1 | Nicotinate and nicotinami   | PRAD | -0.301131256 |
| UCKL1 | Nitrogen metabolism         | PRAD | -0.311040231 |
| UCKL1 | Nod_like_receptor_signal    | PRAD | -0.168894716 |
| UCKL1 | Notch_signaling             | PRAD | -0.232353034 |
| UCKL1 | One carbon pool by folate   | PRAD | 0.045703723  |
| UCKL1 | Other glycan degradation    | PRAD | 0.0386562    |
| UCKL1 | Other types of o-glycan b   | PRAD | 0.257273671  |
| UCKL1 | Oxidative phosphorylatio    | PRAD | 0.211201645  |
| UCKL1 | P53_pathway                 | PRAD | -0.105224655 |
| UCKL1 | P53_signaling_pathway       | PRAD | -0.236241859 |
| UCKL1 | Pantothenate and coa bios   | PRAD | -0.331951486 |
| UCKL1 | Pentose and glucuronate i   | PRAD | -0.169310582 |
| UCKL1 | Pentose phosphate pathwa    | PRAD | 0.127018612  |
| UCKL1 | Pericyte                    | PRAD | -0.289295641 |
| UCKL1 | Phenylalanine metabolism    | PRAD | -0.146089913 |
| UCKL1 | Phenylalanine, tyrosine ar  | PRAD | -0.14763392  |
| UCKL1 | Phosphonate and phosphir    | PRAD | -0.212152704 |
| UCKL1 | Pi3k_akt_activation         | PRAD | -0.429047506 |
| UCKL1 | Pi3k_akt_mtor_signaling     | PRAD | -0.32276657  |
| UCKL1 | Porphyrin and chlorophyl    | PRAD | -0.055913943 |
| UCKL1 | Primary bile acid biosynt   | PRAD | -0.224831708 |
| UCKL1 | Propanoate metabolism       | PRAD | -0.301545648 |
| UCKL1 | Purine metabolism           | PRAD | 0.110047721  |
| UCKL1 | Pyrimidine metabolism       | PRAD | 0.308970417  |
| UCKL1 | Pyruvate metabolism         | PRAD | -0.119299178 |
| UCKL1 | Regulation_of_autophagy     | PRAD | -0.062196708 |
| UCKL1 | Retinol metabolism          | PRAD | -0.244968074 |
| UCKL1 | Riboflavin metabolism       | PRAD | -0.082265604 |
| UCKL1 | Schmahl_pdgf_signaling      | PRAD | -0.435318379 |
| UCKL1 | Selenocompound metabol      | PRAD | -0.320446096 |
| UCKL1 | Signaling_by_hippo          | PRAD | -0.390445819 |
| UCKL1 | Sphingolipid metabolism     | PRAD | -0.336763658 |
| UCKL1 | Starch and sucrose metabo   | PRAD | -0.294438145 |
| UCKL1 | Steroid biosynthesis        | PRAD | 0.008690405  |
| UCKL1 | Steroid hormone biosynth    | PRAD | -0.064704283 |
| UCKL1 | Sulfur metabolism           | PRAD | -0.326052017 |
| UCKL1 | Synthesis and degradation   | PRAD | -0.21119837  |

|       |                            |      |              |
|-------|----------------------------|------|--------------|
| UCKL1 | T helper cell              | PRAD | -0.268141408 |
| UCKL1 | T helper1 (th1) cell       | PRAD | -0.187257383 |
| UCKL1 | T helper17 (th17) cell     | PRAD | -0.296408663 |
| UCKL1 | T helper2 (th2) cell       | PRAD | -0.243520172 |
| UCKL1 | T helper9 (th9) cell       | PRAD | -0.183108506 |
| UCKL1 | Taurine and hypotaurine r  | PRAD | 0.179455666  |
| UCKL1 | Terpenoid backbone biosy   | PRAD | -0.073043512 |
| UCKL1 | Tgf_beta_signaling_pathw   | PRAD | -0.36940811  |
| UCKL1 | Thiamine metabolism        | PRAD | 0.141401158  |
| UCKL1 | Tnfa_signaling_via_nfkb    | PRAD | -0.167245378 |
| UCKL1 | Tryptophan metabolism      | PRAD | -0.304362417 |
| UCKL1 | Tumor endothelial cell     | PRAD | 0.106669686  |
| UCKL1 | Tyrosine metabolism        | PRAD | -0.210396945 |
| UCKL1 | Ubiquinone and other terp  | PRAD | -0.054883779 |
| UCKL1 | Valine, leucine and isoleu | PRAD | -0.05929317  |
| UCKL1 | Valine, leucine and isoleu | PRAD | -0.275915051 |
| UCKL1 | Vascular endothelial cell  | PRAD | -0.13878749  |
| UCKL1 | Vascular smooth muscle c   | PRAD | -0.216133124 |
| UCKL1 | Vegf_signaling_pathway     | PRAD | -0.258495342 |
| UCKL1 | Vitamin b6 metabolism      | PRAD | 0.012683438  |
| UCKL1 | Willert_wnt_signaling      | PRAD | -0.183795199 |
| UCKL1 | Wnt_beta_catenin_signali   | PRAD | -0.004167438 |
| UPP1  | Abnormal plasma cell       | PRAD | 0.193588477  |
| UPP1  | Activated b cell           | PRAD | 0.42316685   |
| UPP1  | Activated cd4+ t cell      | PRAD | 0.272396815  |
| UPP1  | Activated t cell           | PRAD | 0.244449021  |
| UPP1  | Alanine, aspartate and glu | PRAD | -0.258509713 |
| UPP1  | Alcala_apoptosis           | PRAD | 0.044064457  |
| UPP1  | Alpha-linolenic acid meta  | PRAD | 0.056348113  |
| UPP1  | Amino sugar and nucleoti   | PRAD | -0.161568294 |
| UPP1  | Ampk_pathway               | PRAD | -0.38206186  |
| UPP1  | Angiogenesis               | PRAD | 0.485969347  |
| UPP1  | Arachidonic acid metabol   | PRAD | 0.342533936  |
| UPP1  | Arginine and proline metæ  | PRAD | 0.074433568  |
| UPP1  | Arginine biosynthesis      | PRAD | 0.094143077  |
| UPP1  | Ascorbate and aldarate mε  | PRAD | -0.205155632 |
| UPP1  | Atypical memory b cell     | PRAD | 0.165822787  |
| UPP1  | Axl+siglec6+ dendritic ce  | PRAD | 0.524938596  |
| UPP1  | B cell                     | PRAD | 0.323426669  |
| UPP1  | B1 cell                    | PRAD | 0.25899042   |
| UPP1  | Basal cell                 | PRAD | 0.512481343  |
| UPP1  | Beta-alanine metabolism    | PRAD | 0.00038648   |
| UPP1  | Biosynthesis of unsaturate | PRAD | -0.219194569 |

|      |                             |      |              |
|------|-----------------------------|------|--------------|
| UPP1 | Biotin metabolism           | PRAD | -0.300956553 |
| UPP1 | Butanoate metabolism        | PRAD | -0.203276489 |
| UPP1 | Caffeine metabolism         | PRAD | 0.158552458  |
| UPP1 | Cancer stem cell            | PRAD | 0.474806012  |
| UPP1 | Cancer stem-like cell       | PRAD | 0.333361982  |
| UPP1 | Cd4+ cytotoxic t cell       | PRAD | 0.478138715  |
| UPP1 | Cd4+ memory t cell          | PRAD | 0.225443628  |
| UPP1 | Cd4+ regulatory t cell      | PRAD | 0.278206631  |
| UPP1 | Cd4+ t helper cell          | PRAD | 0.291625623  |
| UPP1 | Cd4+cd25+ regulatory t c    | PRAD | 0.28826601   |
| UPP1 | Cd8+ cytotoxic t cell       | PRAD | 0.29476294   |
| UPP1 | Cd8+ regulatory t cell      | PRAD | 0.243554877  |
| UPP1 | Cell_cycle                  | PRAD | -0.311068363 |
| UPP1 | Chandran_metastasis_top5    | PRAD | -0.459647853 |
| UPP1 | Citrate cycle (tca cycle)   | PRAD | -0.286918114 |
| UPP1 | Cysteine and methionine r   | PRAD | -0.22113033  |
| UPP1 | Cytokine induced killer cε  | PRAD | 0.379247132  |
| UPP1 | D-arginine and d-ornithin   | PRAD | -0.066921949 |
| UPP1 | D-glutamine and d-glutan    | PRAD | -0.369030119 |
| UPP1 | Dendritic cell              | PRAD | 0.503775499  |
| UPP1 | Dna_repair                  | PRAD | -0.022061201 |
| UPP1 | Dna_replication             | PRAD | -0.169139836 |
| UPP1 | Double-negative memory      | PRAD | 0.249679613  |
| UPP1 | Drug metabolism - cytoch    | PRAD | 0.167462148  |
| UPP1 | Drug metabolism - other (   | PRAD | 0.109365194  |
| UPP1 | E2f_targets                 | PRAD | -0.268840056 |
| UPP1 | Ecm_receptor_interaction    | PRAD | 0.381979993  |
| UPP1 | Effector cd4+ memory t (    | PRAD | 0.212933651  |
| UPP1 | Effector cd8+ memory t (    | PRAD | 0.426920224  |
| UPP1 | Effector memory t cell      | PRAD | 0.261008866  |
| UPP1 | Effector regulatory t (treg | PRAD | 0.242735681  |
| UPP1 | Elvidge_hif1a_targets_up    | PRAD | -0.20553831  |
| UPP1 | Endothelial cell            | PRAD | 0.52797022   |
| UPP1 | Eosinophil                  | PRAD | 0.40510912   |
| UPP1 | Ether lipid metabolism      | PRAD | 0.211253849  |
| UPP1 | Exhausted cd4+ t cell       | PRAD | 0.375961477  |
| UPP1 | Exhausted cd8+ t cell       | PRAD | 0.506956487  |
| UPP1 | Exhausted t cell            | PRAD | 0.319833868  |
| UPP1 | Fat cell (adipocyte)        | PRAD | 0.103570152  |
| UPP1 | Fatty acid biosynthesis     | PRAD | 0.056579546  |
| UPP1 | Fatty acid degradation      | PRAD | -0.049997077 |
| UPP1 | Fatty acid elongation       | PRAD | -0.146770855 |
| UPP1 | Fibroblast                  | PRAD | 0.492881873  |

|      |                              |      |              |
|------|------------------------------|------|--------------|
| UPP1 | Folate biosynthesis          | PRAD | -0.056444985 |
| UPP1 | Follicular b cell            | PRAD | 0.329239412  |
| UPP1 | Follicular dendritic cell    | PRAD | 0.089491584  |
| UPP1 | Follicular helper (tfh) t ce | PRAD | 0.37413234   |
| UPP1 | Follicular t cell            | PRAD | 0.318719961  |
| UPP1 | Foxp3+il-17+ t cell          | PRAD | 0.008526912  |
| UPP1 | Fructose and mannose me      | PRAD | -0.002577459 |
| UPP1 | G2m_checkpoint               | PRAD | -0.371253704 |
| UPP1 | Galactose metabolism         | PRAD | 0.080871144  |
| UPP1 | Galie_tumor_stemness_ge      | PRAD | 0.236194727  |
| UPP1 | Glutathione metabolism       | PRAD | 0.168290552  |
| UPP1 | Glycerolipid metabolism      | PRAD | 0.041489756  |
| UPP1 | Glycerophospholipid metæ     | PRAD | 0.380642562  |
| UPP1 | Glycine, serine and threor   | PRAD | 0.004068276  |
| UPP1 | Glycolysis / gluconeogene    | PRAD | -0.115390034 |
| UPP1 | Glycosaminoglycan biosy1     | PRAD | 0.445027745  |
| UPP1 | Glycosaminoglycan biosy1     | PRAD | -0.012309844 |
| UPP1 | Glycosaminoglycan biosy1     | PRAD | 0.3556241    |
| UPP1 | Glycosaminoglycan degra      | PRAD | 0.014704596  |
| UPP1 | Glycosphingolipid biosyn1    | PRAD | 0.087018362  |
| UPP1 | Glycosphingolipid biosyn1    | PRAD | 0.079928167  |
| UPP1 | Glycosphingolipid biosyn1    | PRAD | 0.131183251  |
| UPP1 | Glycosylphosphatidylinos:    | PRAD | -0.399407056 |
| UPP1 | Glyoxylate and dicarboxy     | PRAD | -0.271700807 |
| UPP1 | Granulocyte                  | PRAD | 0.332943075  |
| UPP1 | Hedgehog_signaling           | PRAD | 0.044185548  |
| UPP1 | Histidine metabolism         | PRAD | 0.234730035  |
| UPP1 | Hypoxia                      | PRAD | 0.489722655  |
| UPP1 | Il-17alpha t cell            | PRAD | 0.260552355  |
| UPP1 | Il2_stat5_signaling          | PRAD | 0.490307243  |
| UPP1 | Il6_jak_stat3_signaling      | PRAD | 0.422519703  |
| UPP1 | Immune_checkpoints_tunr      | PRAD | 0.248469369  |
| UPP1 | Immune_inhibition_cytok      | PRAD | 0.58866498   |
| UPP1 | Inositol phosphate metabo    | PRAD | -0.23058921  |
| UPP1 | Interleukin_6_signaling      | PRAD | 0.116480552  |
| UPP1 | Jaeger_metastasis_up         | PRAD | 0.012538657  |
| UPP1 | Jain_nfkb_signaling          | PRAD | -0.368376709 |
| UPP1 | Kras_signaling_up            | PRAD | 0.38236348   |
| UPP1 | Linoleic acid metabolism     | PRAD | 0.056798607  |
| UPP1 | Lipoic acid metabolism       | PRAD | -0.274398328 |
| UPP1 | Lysine degradation           | PRAD | -0.530026542 |
| UPP1 | Lysosome                     | PRAD | -0.038649182 |
| UPP1 | M1 macrophage                | PRAD | 0.364293838  |



|      |                             |      |              |
|------|-----------------------------|------|--------------|
| UPP1 | M2 macrophage               | PRAD | 0.440052619  |
| UPP1 | Mannose type o-glycan bi    | PRAD | -0.311234721 |
| UPP1 | Mapk_signaling_pathway      | PRAD | 0.387858499  |
| UPP1 | Mapk3_erk1_activation       | PRAD | -0.020359529 |
| UPP1 | Marginal zone b cell        | PRAD | 0.195676395  |
| UPP1 | Memory b cell               | PRAD | 0.165218397  |
| UPP1 | Mesenchymal cell            | PRAD | 0.624175397  |
| UPP1 | Mesenchymal stem cell       | PRAD | 0.523871685  |
| UPP1 | Metabolism of xenobiotic    | PRAD | 0.182750944  |
| UPP1 | Migrating cancer stem cel   | PRAD | -0.151748486 |
| UPP1 | Mitotic_spindle             | PRAD | -0.407049861 |
| UPP1 | Monocyte                    | PRAD | 0.610781269  |
| UPP1 | Mtor_signaling_pathway      | PRAD | -0.352754833 |
| UPP1 | Mtorc1_signaling            | PRAD | -0.236269325 |
| UPP1 | Mucin type o-glycan bios    | PRAD | -0.280679549 |
| UPP1 | Myc_targets_v1              | PRAD | -0.199221687 |
| UPP1 | Myeloid cell                | PRAD | 0.376400258  |
| UPP1 | N-glycan biosynthesis       | PRAD | -0.437337891 |
| UPP1 | Naive b cell                | PRAD | 0.069273999  |
| UPP1 | Naive cd4+ t cell           | PRAD | 0.231976681  |
| UPP1 | Naive cd8+ t cell           | PRAD | 0.096856438  |
| UPP1 | Natural killer cell         | PRAD | 0.39832529   |
| UPP1 | Natural killer t (nkt) cell | PRAD | 0.248856945  |
| UPP1 | Natural regulatory t (treg) | PRAD | 0.133877995  |
| UPP1 | Neomycin, kanamycin an      | PRAD | 0.165030798  |
| UPP1 | Neutrophil                  | PRAD | 0.486082385  |
| UPP1 | Nicotinate and nicotinami   | PRAD | 0.206201723  |
| UPP1 | Nitrogen metabolism         | PRAD | -0.138280668 |
| UPP1 | Nod_like_receptor_signal    | PRAD | 0.272086998  |
| UPP1 | Notch_signaling             | PRAD | 0.224065728  |
| UPP1 | One carbon pool by folate   | PRAD | -0.427105096 |
| UPP1 | Other glycan degradation    | PRAD | -0.163393714 |
| UPP1 | Other types of o-glycan b   | PRAD | -0.065173374 |
| UPP1 | Oxidative phosphorylatio    | PRAD | 0.158703585  |
| UPP1 | P53_pathway                 | PRAD | 0.485123286  |
| UPP1 | P53_signaling_pathway       | PRAD | -0.029988052 |
| UPP1 | Pantothenate and coa bios   | PRAD | -0.078091368 |
| UPP1 | Pentose and glucuronate i   | PRAD | -0.295277043 |
| UPP1 | Pentose phosphate pathwa    | PRAD | -0.086901645 |
| UPP1 | Pericyte                    | PRAD | 0.550692992  |
| UPP1 | Phenylalanine metabolism    | PRAD | 0.308069358  |
| UPP1 | Phenylalanine, tyrosine ar  | PRAD | 0.019696988  |
| UPP1 | Phosphonate and phosphir    | PRAD | -0.15332343  |

|      |                            |      |              |
|------|----------------------------|------|--------------|
| UPP1 | Pi3k_akt_activation        | PRAD | 0.004177983  |
| UPP1 | Pi3k_akt_mtor_signaling    | PRAD | -0.209279884 |
| UPP1 | Porphyrin and chlorophyl   | PRAD | -0.121720842 |
| UPP1 | Primary bile acid biosynt  | PRAD | 0.157015356  |
| UPP1 | Propanoate metabolism      | PRAD | -0.390454689 |
| UPP1 | Purine metabolism          | PRAD | -0.148545526 |
| UPP1 | Pyrimidine metabolism      | PRAD | -0.192276886 |
| UPP1 | Pyruvate metabolism        | PRAD | -0.206355669 |
| UPP1 | Regulation_of_autophagy    | PRAD | -0.266624488 |
| UPP1 | Retinol metabolism         | PRAD | 0.157284232  |
| UPP1 | Riboflavin metabolism      | PRAD | -0.102531075 |
| UPP1 | Schmahl_pdgf_signaling     | PRAD | 0.074566577  |
| UPP1 | Selenocompound metabol     | PRAD | -0.452537571 |
| UPP1 | Signaling_by_hippo         | PRAD | -0.343703469 |
| UPP1 | Sphingolipid metabolism    | PRAD | -0.424717391 |
| UPP1 | Starch and sucrose metabo  | PRAD | 0.025409592  |
| UPP1 | Steroid biosynthesis       | PRAD | -0.088952821 |
| UPP1 | Steroid hormone biosynth   | PRAD | 0.126010754  |
| UPP1 | Sulfur metabolism          | PRAD | -0.344830272 |
| UPP1 | Synthesis and degradation  | PRAD | 0.021978071  |
| UPP1 | T helper cell              | PRAD | 0.432169775  |
| UPP1 | T helper1 (th1) cell       | PRAD | 0.311368942  |
| UPP1 | T helper17 (th17) cell     | PRAD | 0.379018328  |
| UPP1 | T helper2 (th2) cell       | PRAD | 0.477017154  |
| UPP1 | T helper9 (th9) cell       | PRAD | 0.373704862  |
| UPP1 | Taurine and hypotaurine r  | PRAD | 0.219470803  |
| UPP1 | Terpenoid backbone biosy   | PRAD | -0.362153187 |
| UPP1 | Tgf_beta_signaling_pathw   | PRAD | 0.078985829  |
| UPP1 | Thiamine metabolism        | PRAD | 0.089348655  |
| UPP1 | Tnfa_signaling_via_nfb     | PRAD | 0.473224674  |
| UPP1 | Tryptophan metabolism      | PRAD | 0.111617945  |
| UPP1 | Tumor endothelial cell     | PRAD | 0.056911302  |
| UPP1 | Tyrosine metabolism        | PRAD | 0.193165185  |
| UPP1 | Ubiquinone and other ter   | PRAD | -0.263460508 |
| UPP1 | Valine, leucine and isoleu | PRAD | 0.211293917  |
| UPP1 | Valine, leucine and isoleu | PRAD | -0.256760337 |
| UPP1 | Vascular endothelial cell  | PRAD | 0.645906512  |
| UPP1 | Vascular smooth muscle c   | PRAD | 0.415928343  |
| UPP1 | Vegf_signaling_pathway     | PRAD | 0.36731481   |
| UPP1 | Vitamin b6 metabolism      | PRAD | -0.172138024 |
| UPP1 | Willert_wnt_signaling      | PRAD | 0.042654777  |
| UPP1 | Wnt_beta_catenin_signali   | PRAD | 0.131147273  |
| UPP2 | Abnormal plasma cell       | PRAD | 0.08590379   |

|      |                            |      |              |
|------|----------------------------|------|--------------|
| UPP2 | Activated b cell           | PRAD | 0.022320421  |
| UPP2 | Activated cd4+ t cell      | PRAD | 0.000879412  |
| UPP2 | Activated t cell           | PRAD | -0.019093274 |
| UPP2 | Alanine, aspartate and glu | PRAD | -0.156006374 |
| UPP2 | Alcala_apoptosis           | PRAD | -0.173880064 |
| UPP2 | Alpha-linolenic acid meta  | PRAD | -0.160095367 |
| UPP2 | Amino sugar and nucleoti   | PRAD | -0.229023012 |
| UPP2 | Ampk_pathway               | PRAD | -0.010187105 |
| UPP2 | Angiogenesis               | PRAD | 0.00863002   |
| UPP2 | Arachidonic acid metabol   | PRAD | -0.113858148 |
| UPP2 | Arginine and proline meta  | PRAD | -0.12273647  |
| UPP2 | Arginine biosynthesis      | PRAD | -0.003262307 |
| UPP2 | Ascorbate and aldarate mε  | PRAD | -0.098288122 |
| UPP2 | Atypical memory b cell     | PRAD | 0.078207142  |
| UPP2 | Axl+siglec6+ dendritic ce  | PRAD | -0.018763817 |
| UPP2 | B cell                     | PRAD | -0.016884609 |
| UPP2 | B1 cell                    | PRAD | -0.057477697 |
| UPP2 | Basal cell                 | PRAD | 0.093419087  |
| UPP2 | Beta-alanine metabolism    | PRAD | 0.02725      |
| UPP2 | Biosynthesis of unsaturate | PRAD | -0.100514241 |
| UPP2 | Biotin metabolism          | PRAD | -0.125739311 |
| UPP2 | Butanoate metabolism       | PRAD | -0.094774149 |
| UPP2 | Caffeine metabolism        | PRAD | 0.046761463  |
| UPP2 | Cancer stem cell           | PRAD | 0.045409565  |
| UPP2 | Cancer stem-like cell      | PRAD | 0.060426886  |
| UPP2 | Cd4+ cytotoxic t cell      | PRAD | 0.045233759  |
| UPP2 | Cd4+ memory t cell         | PRAD | -0.050680901 |
| UPP2 | Cd4+ regulatory t cell     | PRAD | -0.009378304 |
| UPP2 | Cd4+ t helper cell         | PRAD | -0.010928363 |
| UPP2 | Cd4+cd25+ regulatory t c   | PRAD | -0.013732591 |
| UPP2 | Cd8+ cytotoxic t cell      | PRAD | -0.009301162 |
| UPP2 | Cd8+ regulatory t cell     | PRAD | 0.024471528  |
| UPP2 | Cell_cycle                 | PRAD | 0.01122151   |
| UPP2 | Chandran_metastasis_top5   | PRAD | -0.076074232 |
| UPP2 | Citrate cycle (tca cycle)  | PRAD | -0.224076157 |
| UPP2 | Cysteine and methionine r  | PRAD | -0.081560925 |
| UPP2 | Cytokine induced killer cε | PRAD | 0.036797563  |
| UPP2 | D-arginine and d-ornithin  | PRAD | -0.005026086 |
| UPP2 | D-glutamine and d-glutan   | PRAD | 0.018367925  |
| UPP2 | Dendritic cell             | PRAD | 0.023142455  |
| UPP2 | Dna_repair                 | PRAD | -0.011736539 |
| UPP2 | Dna_replication            | PRAD | 0.08223612   |
| UPP2 | Double-negative memory     | PRAD | -0.027042118 |

|      |                                   |              |
|------|-----------------------------------|--------------|
| UPP2 | Drug metabolism - cytochPRAD      | 0.037977648  |
| UPP2 | Drug metabolism - other (PRAD     | -0.041217824 |
| UPP2 | E2f_targets PRAD                  | 0.036452943  |
| UPP2 | Ecm_receptor_interaction PRAD     | 0.028122392  |
| UPP2 | Effector cd4+ memory t ( PRAD     | -0.043100182 |
| UPP2 | Effector cd8+ memory t ( PRAD     | 0.028721648  |
| UPP2 | Effector memory t cell PRAD       | -0.037991938 |
| UPP2 | Effector regulatory t (treg PRAD  | -0.022608529 |
| UPP2 | Elvidge_hif1a_targets_up PRAD     | -0.234652453 |
| UPP2 | Endothelial cell PRAD             | 0.068843657  |
| UPP2 | Eosinophil PRAD                   | -0.036177464 |
| UPP2 | Ether lipid metabolism PRAD       | -0.05137047  |
| UPP2 | Exhausted cd4+ t cell PRAD        | -0.030221388 |
| UPP2 | Exhausted cd8+ t cell PRAD        | 0.015775666  |
| UPP2 | Exhausted t cell PRAD             | 0.01204998   |
| UPP2 | Fat cell (adipocyte) PRAD         | -0.078710935 |
| UPP2 | Fatty acid biosynthesis PRAD      | -0.028053304 |
| UPP2 | Fatty acid degradation PRAD       | 0.025134592  |
| UPP2 | Fatty acid elongation PRAD        | -0.050004586 |
| UPP2 | Fibroblast PRAD                   | 0.068459112  |
| UPP2 | Folate biosynthesis PRAD          | -0.144770213 |
| UPP2 | Follicular b cell PRAD            | -0.028449405 |
| UPP2 | Follicular dendritic cell PRAD    | -0.05112366  |
| UPP2 | Follicular helper (tfh) t ce PRAD | 0.073322603  |
| UPP2 | Follicular t cell PRAD            | -0.02962154  |
| UPP2 | Foxp3+il-17+ t cell PRAD          | -0.010016135 |
| UPP2 | Fructose and mannose me PRAD      | -0.107821517 |
| UPP2 | G2m_checkpoint PRAD               | -0.006534544 |
| UPP2 | Galactose metabolism PRAD         | -0.195863281 |
| UPP2 | Galie_tumor_stemness_ge PRAD      | 0.038013844  |
| UPP2 | Glutathione metabolism PRAD       | -0.010118846 |
| UPP2 | Glycerolipid metabolism PRAD      | 0.037949403  |
| UPP2 | Glycerophospholipid metæ PRAD     | 0.08173133   |
| UPP2 | Glycine, serine and threor PRAD   | 0.073003689  |
| UPP2 | Glycolysis / gluconeogene PRAD    | -0.113988668 |
| UPP2 | Glycosaminoglycan biosy1 PRAD     | -0.030171378 |
| UPP2 | Glycosaminoglycan biosy1 PRAD     | -0.011004592 |
| UPP2 | Glycosaminoglycan biosy1 PRAD     | -0.000388385 |
| UPP2 | Glycosaminoglycan degra PRAD      | -0.210465606 |
| UPP2 | Glycosphingolipid biosyn1 PRAD    | -0.03039286  |
| UPP2 | Glycosphingolipid biosyn1 PRAD    | -0.11380449  |
| UPP2 | Glycosphingolipid biosyn1 PRAD    | -0.044913385 |
| UPP2 | Glycosylphosphatidylinos: PRAD    | -0.185468697 |

|      |                             |      |              |
|------|-----------------------------|------|--------------|
| UPP2 | Glyoxylate and dicarboxy    | PRAD | -0.230141853 |
| UPP2 | Granulocyte                 | PRAD | 0.041602912  |
| UPP2 | Hedgehog_signaling          | PRAD | -0.129627703 |
| UPP2 | Histidine metabolism        | PRAD | 0.113594247  |
| UPP2 | Hypoxia                     | PRAD | -0.026265374 |
| UPP2 | Il-17alpha t cell           | PRAD | -0.033337899 |
| UPP2 | Il2_stat5_signaling         | PRAD | -0.056971387 |
| UPP2 | Il6_jak_stat3_signaling     | PRAD | -0.045379886 |
| UPP2 | Immune_checkpoints_turr     | PRAD | -0.009404966 |
| UPP2 | Immune_inhibition_cytok     | PRAD | 0.087412718  |
| UPP2 | Inositol phosphate metabo   | PRAD | 0.049927452  |
| UPP2 | Interleukin_6_signaling     | PRAD | -0.065246519 |
| UPP2 | Jaeger_metastasis_up        | PRAD | 0.007651474  |
| UPP2 | Jain_nfkb_signaling         | PRAD | -0.145653559 |
| UPP2 | Kras_signaling_up           | PRAD | -0.05116175  |
| UPP2 | Linoleic acid metabolism    | PRAD | -0.145856919 |
| UPP2 | Lipoic acid metabolism      | PRAD | 0.074811581  |
| UPP2 | Lysine degradation          | PRAD | -0.062522814 |
| UPP2 | Lysosome                    | PRAD | -0.152447549 |
| UPP2 | M1 macrophage               | PRAD | -0.020888554 |
| UPP2 | M2 macrophage               | PRAD | 0.018916325  |
| UPP2 | Mannose type o-glycan bi    | PRAD | -0.145248937 |
| UPP2 | Mapk_signaling_pathway      | PRAD | 0.021896245  |
| UPP2 | Mapk3_erk1_activation       | PRAD | -0.02390645  |
| UPP2 | Marginal zone b cell        | PRAD | -0.041098879 |
| UPP2 | Memory b cell               | PRAD | -0.048708665 |
| UPP2 | Mesenchymal cell            | PRAD | 0.077220062  |
| UPP2 | Mesenchymal stem cell       | PRAD | 0.040633879  |
| UPP2 | Metabolism of xenobiotic    | PRAD | 0.027006712  |
| UPP2 | Migrating cancer stem cel   | PRAD | -0.167190676 |
| UPP2 | Mitotic_spindle             | PRAD | -0.066405534 |
| UPP2 | Monocyte                    | PRAD | 0.009622326  |
| UPP2 | Mtor_signaling_pathway      | PRAD | -0.053142023 |
| UPP2 | Mtorc1_signaling            | PRAD | -0.163174512 |
| UPP2 | Mucin type o-glycan biosy   | PRAD | -0.2084239   |
| UPP2 | Myc_targets_v1              | PRAD | -0.128347427 |
| UPP2 | Myeloid cell                | PRAD | 0.0129417    |
| UPP2 | N-glycan biosynthesis       | PRAD | -0.274619224 |
| UPP2 | Naive b cell                | PRAD | -0.048271727 |
| UPP2 | Naive cd4+ t cell           | PRAD | -0.047631205 |
| UPP2 | Naive cd8+ t cell           | PRAD | -0.025072428 |
| UPP2 | Natural killer cell         | PRAD | 0.012636477  |
| UPP2 | Natural killer t (nkt) cell | PRAD | -0.085934834 |

|      |                                  |              |
|------|----------------------------------|--------------|
| UPP2 | Natural regulatory t (treg) PRAD | -0.05700438  |
| UPP2 | Neomycin, kanamycin and PRAD     | -0.046885519 |
| UPP2 | Neutrophil PRAD                  | -0.004886167 |
| UPP2 | Nicotinate and nicotinami PRAD   | -0.002839164 |
| UPP2 | Nitrogen metabolism PRAD         | -0.088015783 |
| UPP2 | Nod_like_receptor_signal PRAD    | 0.000540518  |
| UPP2 | Notch_signaling PRAD             | 0.016089081  |
| UPP2 | One carbon pool by folate PRAD   | -0.104196944 |
| UPP2 | Other glycan degradation PRAD    | -0.148618815 |
| UPP2 | Other types of o-glycan b PRAD   | -0.056228671 |
| UPP2 | Oxidative phosphorylatior PRAD   | 0.011941036  |
| UPP2 | P53_pathway PRAD                 | 0.058636083  |
| UPP2 | P53_signaling_pathway PRAD       | 0.044923781  |
| UPP2 | Pantothenate and coa bios PRAD   | -0.11467535  |
| UPP2 | Pentose and glucuronate in PRAD  | -0.199090802 |
| UPP2 | Pentose phosphate pathwa PRAD    | -0.16926564  |
| UPP2 | Pericyte PRAD                    | 0.115642033  |
| UPP2 | Phenylalanine metabolism PRAD    | 0.089988869  |
| UPP2 | Phenylalanine, tyrosine ar PRAD  | 0.013765546  |
| UPP2 | Phosphonate and phosphir PRAD    | 0.063119989  |
| UPP2 | Pi3k_akt_activation PRAD         | 0.026544986  |
| UPP2 | Pi3k_akt_mtor_signaling PRAD     | -0.229829603 |
| UPP2 | Porphyrin and chlorophyl PRAD    | -0.066433603 |
| UPP2 | Primary bile acid biosynt PRAD   | 0.00114401   |
| UPP2 | Propanoate metabolism PRAD       | -0.177426556 |
| UPP2 | Purine metabolism PRAD           | -0.166925351 |
| UPP2 | Pyrimidine metabolism PRAD       | -0.038709975 |
| UPP2 | Pyruvate metabolism PRAD         | -0.123031468 |
| UPP2 | Regulation_of_autophagy PRAD     | -0.074580894 |
| UPP2 | Retinol metabolism PRAD          | 0.030912801  |
| UPP2 | Riboflavin metabolism PRAD       | -0.145165197 |
| UPP2 | Schmahl_pdgf_signaling PRAD      | -0.093204991 |
| UPP2 | Selenocompound metabol PRAD      | -0.198568291 |
| UPP2 | Signaling_by_hippo PRAD          | -0.098397779 |
| UPP2 | Sphingolipid metabolism PRAD     | -0.140187873 |
| UPP2 | Starch and sucrose metab PRAD    | -0.10590453  |
| UPP2 | Steroid biosynthesis PRAD        | 0.038527804  |
| UPP2 | Steroid hormone biosynth PRAD    | 0.005794607  |
| UPP2 | Sulfur metabolism PRAD           | -0.163120737 |
| UPP2 | Synthesis and degradation PRAD   | -0.008350867 |
| UPP2 | T helper cell PRAD               | -0.001338193 |
| UPP2 | T helper1 (th1) cell PRAD        | -0.007449135 |
| UPP2 | T helper17 (th17) cell PRAD      | 0.047537435  |

|      |                            |      |              |
|------|----------------------------|------|--------------|
| UPP2 | T helper2 (th2) cell       | PRAD | 0.040920339  |
| UPP2 | T helper9 (th9) cell       | PRAD | 0.030938596  |
| UPP2 | Taurine and hypotaurine r  | PRAD | 0.061126956  |
| UPP2 | Terpenoid backbone biosy   | PRAD | -0.147766994 |
| UPP2 | Tgf_beta_signaling_pathw   | PRAD | -0.020406251 |
| UPP2 | Thiamine metabolism        | PRAD | -0.075916164 |
| UPP2 | Tnfa_signaling_via_nfkB    | PRAD | 0.019764411  |
| UPP2 | Tryptophan metabolism      | PRAD | -0.114560399 |
| UPP2 | Tumor endothelial cell     | PRAD | 0.144329195  |
| UPP2 | Tyrosine metabolism        | PRAD | 0.044941307  |
| UPP2 | Ubiquinone and other terq  | PRAD | -0.059633411 |
| UPP2 | Valine, leucine and isoleu | PRAD | -0.058651258 |
| UPP2 | Valine, leucine and isoleu | PRAD | -0.096761343 |
| UPP2 | Vascular endothelial cell  | PRAD | 0.004238197  |
| UPP2 | Vascular smooth muscle c   | PRAD | -0.028065742 |
| UPP2 | Vegf_signaling_pathway     | PRAD | 0.01972954   |
| UPP2 | Vitamin b6 metabolism      | PRAD | -0.142870509 |
| UPP2 | Willert_wnt_signaling      | PRAD | -0.154614923 |
| UPP2 | Wnt_beta_catenin_signali   | PRAD | -0.049007989 |
| CDA  | Abnormal plasma cell       | READ | -0.082351882 |
| CDA  | Activated b cell           | READ | -0.114089826 |
| CDA  | Activated cd4+ t cell      | READ | 0.071584927  |
| CDA  | Activated t cell           | READ | -0.00953352  |
| CDA  | Alanine, aspartate and glu | READ | 0.095314452  |
| CDA  | Alcala_apoptosis           | READ | 0.06388352   |
| CDA  | Alpha-linolenic acid meta  | READ | 0.209881257  |
| CDA  | Amino sugar and nucleoti   | READ | 0.132937627  |
| CDA  | Ampk_pathway               | READ | -0.006898838 |
| CDA  | Angiogenesis               | READ | 0.12870057   |
| CDA  | Arachidonic acid metabol   | READ | 0.338602173  |
| CDA  | Arginine and proline metæ  | READ | 0.140324519  |
| CDA  | Arginine biosynthesis      | READ | 0.103449056  |
| CDA  | Ascorbate and aldarate mε  | READ | -0.022268247 |
| CDA  | Atypical memory b cell     | READ | -0.032950414 |
| CDA  | Axl+siglec6+ dendritic ce  | READ | 0.120376664  |
| CDA  | B cell                     | READ | -0.026658618 |
| CDA  | B1 cell                    | READ | -0.188202928 |
| CDA  | Basal cell                 | READ | 0.452588166  |
| CDA  | Beta-alanine metabolism    | READ | 0.068092639  |
| CDA  | Biosynthesis of unsaturate | READ | 0.097255603  |
| CDA  | Biotin metabolism          | READ | -0.1550778   |
| CDA  | Butanoate metabolism       | READ | -0.041932141 |
| CDA  | Caffeine metabolism        | READ | 0.058866751  |

|     |                             |      |              |
|-----|-----------------------------|------|--------------|
| CDA | Cancer stem cell            | READ | 0.058916702  |
| CDA | Cancer stem-like cell       | READ | -0.024086283 |
| CDA | Cd4+ cytotoxic t cell       | READ | 0.124288839  |
| CDA | Cd4+ memory t cell          | READ | -0.046067418 |
| CDA | Cd4+ regulatory t cell      | READ | 0.018303788  |
| CDA | Cd4+ t helper cell          | READ | -0.026184539 |
| CDA | Cd4+cd25+ regulatory t c    | READ | -0.019233013 |
| CDA | Cd8+ cytotoxic t cell       | READ | 0.092111633  |
| CDA | Cd8+ regulatory t cell      | READ | -0.011089854 |
| CDA | Cell_cycle                  | READ | -0.054764171 |
| CDA | Chandran_metastasis_top5    | READ | -0.141335507 |
| CDA | Citrate cycle (tca cycle)   | READ | 0.028929784  |
| CDA | Cysteine and methionine r   | READ | 0.051895547  |
| CDA | Cytokine induced killer c   | READ | -0.046505765 |
| CDA | D-arginine and d-ornithin   | READ | 0.238524288  |
| CDA | D-glutamine and d-glutan    | READ | 0.190823891  |
| CDA | Dendritic cell              | READ | 0.095098084  |
| CDA | Dna_repair                  | READ | 0.02187143   |
| CDA | Dna_replication             | READ | -0.089213159 |
| CDA | Double-negative memory      | READ | -0.094407589 |
| CDA | Drug metabolism - cytoch    | READ | 0.171772267  |
| CDA | Drug metabolism - other     | READ | 0.15598395   |
| CDA | E2f_targets                 | READ | -0.140228773 |
| CDA | Ecm_receptor_interaction    | READ | 0.103209265  |
| CDA | Effector cd4+ memory t (    | READ | -0.039583664 |
| CDA | Effector cd8+ memory t (    | READ | 0.086340189  |
| CDA | Effector memory t cell      | READ | -0.02662916  |
| CDA | Effector regulatory t (treg | READ | 0.017091719  |
| CDA | Elvidge_hif1a_targets_up    | READ | -0.046008749 |
| CDA | Endothelial cell            | READ | 0.013853029  |
| CDA | Eosinophil                  | READ | 0.108934374  |
| CDA | Ether lipid metabolism      | READ | 0.201751512  |
| CDA | Exhausted cd4+ t cell       | READ | 0.056669711  |
| CDA | Exhausted cd8+ t cell       | READ | 0.092938151  |
| CDA | Exhausted t cell            | READ | -0.022229322 |
| CDA | Fat cell (adipocyte)        | READ | -0.144652052 |
| CDA | Fatty acid biosynthesis     | READ | 0.000606365  |
| CDA | Fatty acid degradation      | READ | -0.052033219 |
| CDA | Fatty acid elongation       | READ | 0.176721502  |
| CDA | Fibroblast                  | READ | 0.090039151  |
| CDA | Folate biosynthesis         | READ | 0.21308808   |
| CDA | Follicular b cell           | READ | -0.076769279 |
| CDA | Follicular dendritic cell   | READ | 0.012993718  |



|     |                              |      |              |
|-----|------------------------------|------|--------------|
| CDA | Follicular helper (tfh) t ce | READ | 0.056906751  |
| CDA | Follicular t cell            | READ | -0.050227887 |
| CDA | Foxp3+il-17+ t cell          | READ | -0.036449333 |
| CDA | Fructose and mannose me      | READ | 0.090558054  |
| CDA | G2m_checkpoint               | READ | -0.179372975 |
| CDA | Galactose metabolism         | READ | 0.202701028  |
| CDA | Galie_tumor_stemness_ge      | READ | 0.28444433   |
| CDA | Glutathione metabolism       | READ | 0.322723037  |
| CDA | Glycerolipid metabolism      | READ | 0.189461753  |
| CDA | Glycerophospholipid metæ     | READ | 0.21886589   |
| CDA | Glycine, serine and threor   | READ | 0.158138015  |
| CDA | Glycolysis / gluconeogene    | READ | 0.058617694  |
| CDA | Glycosaminoglycan biosy      | READ | 0.18182782   |
| CDA | Glycosaminoglycan biosy      | READ | 0.211870906  |
| CDA | Glycosaminoglycan biosy      | READ | 0.199854507  |
| CDA | Glycosaminoglycan degra      | READ | 0.061848532  |
| CDA | Glycosphingolipid biosyn     | READ | 0.1779827    |
| CDA | Glycosphingolipid biosyn     | READ | 0.264720626  |
| CDA | Glycosphingolipid biosyn     | READ | 0.078749069  |
| CDA | Glycosylphosphatidylinos     | READ | -0.113736769 |
| CDA | Glyoxylate and dicarboxy     | READ | -0.063804132 |
| CDA | Granulocyte                  | READ | 0.09292725   |
| CDA | Hedgehog_signaling           | READ | 0.147862152  |
| CDA | Histidine metabolism         | READ | -0.002163732 |
| CDA | Hypoxia                      | READ | 0.170185448  |
| CDA | Il-17ralpha t cell           | READ | -0.039112062 |
| CDA | Il2_stat5_signaling          | READ | 0.058382631  |
| CDA | Il6_jak_stat3_signaling      | READ | 0.118019477  |
| CDA | Immune_checkpoints_tur       | READ | 0.076254576  |
| CDA | Immune_inhibition_cytok      | READ | 0.075704028  |
| CDA | Inositol phosphate metabo    | READ | -0.069656599 |
| CDA | Interleukin_6_signaling      | READ | -0.082144567 |
| CDA | Jaeger_metastasis_up         | READ | 0.001182421  |
| CDA | Jain_nfkb_signaling          | READ | -0.092768564 |
| CDA | Kras_signaling_up            | READ | 0.102315636  |
| CDA | Linoleic acid metabolism     | READ | 0.239076691  |
| CDA | Lipoic acid metabolism       | READ | -0.051160016 |
| CDA | Lysine degradation           | READ | -0.08972343  |
| CDA | Lysosome                     | READ | 0.322301152  |
| CDA | M1 macrophage                | READ | 0.074267643  |
| CDA | M2 macrophage                | READ | 0.108702376  |
| CDA | Mannose type o-glycan bi     | READ | -0.065713328 |
| CDA | Mapk_signaling_pathway       | READ | 0.074714526  |

|     |                                                   |      |              |
|-----|---------------------------------------------------|------|--------------|
| CDA | Mapk3_erk1_activation                             | READ | 0.066714254  |
| CDA | Marginal zone b cell                              | READ | -0.051544033 |
| CDA | Memory b cell                                     | READ | -0.037363193 |
| CDA | Mesenchymal cell                                  | READ | 0.144301011  |
| CDA | Mesenchymal stem cell                             | READ | 0.058432137  |
| CDA | Metabolism of xenobiotics                         | READ | 0.208588293  |
| CDA | Migrating cancer stem cell                        | READ | 0.085273403  |
| CDA | Mitotic_spindle                                   | READ | -0.118850336 |
| CDA | Monocyte                                          | READ | 0.172802323  |
| CDA | Mtor_signaling_pathway                            | READ | 0.081228576  |
| CDA | Mtorc1_signaling                                  | READ | 0.054392215  |
| CDA | Mucin type o-glycan biosynthesis                  | READ | 0.009365188  |
| CDA | Myc_targets_v1                                    | READ | -0.050872938 |
| CDA | Myeloid cell                                      | READ | 0.063673726  |
| CDA | N-glycan biosynthesis                             | READ | -0.00999656  |
| CDA | Naive b cell                                      | READ | -0.157198807 |
| CDA | Naive cd4+ t cell                                 | READ | -0.043535028 |
| CDA | Naive cd8+ t cell                                 | READ | -0.136499475 |
| CDA | Natural killer cell                               | READ | 0.066260921  |
| CDA | Natural killer t (nkt) cell                       | READ | -0.053332698 |
| CDA | Natural regulatory t (treg) cell                  | READ | 0.019904489  |
| CDA | Neomycin, kanamycin and streptomycin              | READ | 0.28820918   |
| CDA | Neutrophil                                        | READ | 0.234396705  |
| CDA | Nicotinate and nicotinamide                       | READ | -0.051535986 |
| CDA | Nitrogen metabolism                               | READ | 0.126681761  |
| CDA | Nod_like_receptor_signaling                       | READ | 0.067890457  |
| CDA | Notch_signaling                                   | READ | 0.024117686  |
| CDA | One carbon pool by folate                         | READ | -0.016953793 |
| CDA | Other glycan degradation                          | READ | 0.063509788  |
| CDA | Other types of o-glycan biosynthesis              | READ | 0.029306455  |
| CDA | Oxidative phosphorylation                         | READ | 0.18458512   |
| CDA | P53_pathway                                       | READ | 0.232592366  |
| CDA | P53_signaling_pathway                             | READ | 0.124571886  |
| CDA | Pantothenate and coenzyme a biosynthesis          | READ | 0.027943953  |
| CDA | Pentose and glucuronate interconversions          | READ | 0.084839672  |
| CDA | Pentose phosphate pathway                         | READ | 0.274837065  |
| CDA | Pericyte                                          | READ | 0.101302472  |
| CDA | Phenylalanine metabolism                          | READ | 0.177776008  |
| CDA | Phenylalanine, tyrosine and tryptophan metabolism | READ | -0.019313867 |
| CDA | Phosphonate and phosphite metabolism              | READ | 0.063521228  |
| CDA | Pi3k_akt_activation                               | READ | -0.021977382 |
| CDA | Pi3k_akt_mtor_signaling                           | READ | 0.139376684  |
| CDA | Porphyryin and chlorophyll biosynthesis           | READ | 0.105568065  |

|      |                            |      |              |
|------|----------------------------|------|--------------|
| CDA  | Primary bile acid biosynt  | READ | 0.086802401  |
| CDA  | Propanoate metabolism      | READ | -0.071572642 |
| CDA  | Purine metabolism          | READ | -0.032832082 |
| CDA  | Pyrimidine metabolism      | READ | 0.01542627   |
| CDA  | Pyruvate metabolism        | READ | -0.065905325 |
| CDA  | Regulation_of_autophagy    | READ | -0.014450396 |
| CDA  | Retinol metabolism         | READ | 0.108796852  |
| CDA  | Riboflavin metabolism      | READ | 0.125615914  |
| CDA  | Schmahl_pdgf_signaling     | READ | 0.133979312  |
| CDA  | Selenocompound metabol     | READ | 0.033965102  |
| CDA  | Signaling_by_hippo         | READ | 0.002975497  |
| CDA  | Sphingolipid metabolism    | READ | 0.191576686  |
| CDA  | Starch and sucrose metabo  | READ | 0.081190037  |
| CDA  | Steroid biosynthesis       | READ | 0.058999033  |
| CDA  | Steroid hormone biosynth   | READ | 0.27400817   |
| CDA  | Sulfur metabolism          | READ | 0.119271833  |
| CDA  | Synthesis and degradation  | READ | -0.095893507 |
| CDA  | T helper cell              | READ | 0.048264318  |
| CDA  | T helper1 (th1) cell       | READ | 0.075997396  |
| CDA  | T helper17 (th17) cell     | READ | -0.031355675 |
| CDA  | T helper2 (th2) cell       | READ | 0.022876871  |
| CDA  | T helper9 (th9) cell       | READ | -0.054271545 |
| CDA  | Taurine and hypotaurine r  | READ | 0.148300165  |
| CDA  | Terpenoid backbone biosy   | READ | -0.031712411 |
| CDA  | Tgf_beta_signaling_pathw   | READ | 0.063905704  |
| CDA  | Thiamine metabolism        | READ | 0.305051189  |
| CDA  | Tnfa_signaling_via_nfkb    | READ | 0.116746572  |
| CDA  | Tryptophan metabolism      | READ | -0.035858593 |
| CDA  | Tumor endothelial cell     | READ | 0.187122962  |
| CDA  | Tyrosine metabolism        | READ | 0.151220327  |
| CDA  | Ubiquinone and other ter   | READ | 0.041231322  |
| CDA  | Valine, leucine and isoleu | READ | 0.025885342  |
| CDA  | Valine, leucine and isoleu | READ | -0.057546969 |
| CDA  | Vascular endothelial cell  | READ | 0.039870852  |
| CDA  | Vascular smooth muscle c   | READ | 0.076957183  |
| CDA  | Vegf_signaling_pathway     | READ | 0.301243384  |
| CDA  | Vitamin b6 metabolism      | READ | 0.073877815  |
| CDA  | Willert_wnt_signaling      | READ | 0.074574259  |
| CDA  | Wnt_beta_catenin_signali   | READ | -0.041768923 |
| UCK1 | Abnormal plasma cell       | READ | 0.130172803  |
| UCK1 | Activated b cell           | READ | 0.102856289  |
| UCK1 | Activated cd4+ t cell      | READ | 0.143366115  |
| UCK1 | Activated t cell           | READ | 0.194686927  |

|      |                            |      |              |
|------|----------------------------|------|--------------|
| UCK1 | Alanine, aspartate and glu | READ | -0.021439733 |
| UCK1 | Alcala_apoptosis           | READ | 0.106366102  |
| UCK1 | Alpha-linolenic acid meta  | READ | 0.17421045   |
| UCK1 | Amino sugar and nucleoti   | READ | 0.245840172  |
| UCK1 | Ampk_pathway               | READ | 0.008760821  |
| UCK1 | Angiogenesis               | READ | 0.180298857  |
| UCK1 | Arachidonic acid metabol   | READ | 0.29551437   |
| UCK1 | Arginine and proline metæ  | READ | 0.079723624  |
| UCK1 | Arginine biosynthesis      | READ | 0.044504792  |
| UCK1 | Ascorbate and aldarate mε  | READ | -0.13016952  |
| UCK1 | Atypical memory b cell     | READ | -0.019047836 |
| UCK1 | Axl+siglec6+ dendritic ce  | READ | 0.212354727  |
| UCK1 | B cell                     | READ | 0.031305562  |
| UCK1 | B1 cell                    | READ | 0.089913475  |
| UCK1 | Basal cell                 | READ | 0.210592097  |
| UCK1 | Beta-alanine metabolism    | READ | 0.025834995  |
| UCK1 | Biosynthesis of unsaturate | READ | 0.004557318  |
| UCK1 | Biotin metabolism          | READ | -0.204531518 |
| UCK1 | Butanoate metabolism       | READ | -0.02565839  |
| UCK1 | Caffeine metabolism        | READ | -0.136390192 |
| UCK1 | Cancer stem cell           | READ | -0.01428481  |
| UCK1 | Cancer stem-like cell      | READ | -0.111238252 |
| UCK1 | Cd4+ cytotoxic t cell      | READ | 0.231790345  |
| UCK1 | Cd4+ memory t cell         | READ | 0.110078756  |
| UCK1 | Cd4+ regulatory t cell     | READ | 0.177188042  |
| UCK1 | Cd4+ t helper cell         | READ | 0.147211252  |
| UCK1 | Cd4+cd25+ regulatory t c   | READ | 0.13568733   |
| UCK1 | Cd8+ cytotoxic t cell      | READ | 0.218557326  |
| UCK1 | Cd8+ regulatory t cell     | READ | 0.103480807  |
| UCK1 | Cell_cycle                 | READ | -0.128171161 |
| UCK1 | Chandran_metastasis_topç   | READ | -0.323786858 |
| UCK1 | Citrate cycle (tca cycle)  | READ | -0.112874282 |
| UCK1 | Cysteine and methionine r  | READ | -0.010554746 |
| UCK1 | Cytokine induced killer cε | READ | 0.214632914  |
| UCK1 | D-arginine and d-ornithin  | READ | -0.035750432 |
| UCK1 | D-glutamine and d-glutan   | READ | -0.318964545 |
| UCK1 | Dendritic cell             | READ | 0.188477702  |
| UCK1 | Dna_repair                 | READ | 0.119862734  |
| UCK1 | Dna_replication            | READ | 0.00357382   |
| UCK1 | Double-negative memory     | READ | 0.174590574  |
| UCK1 | Drug metabolism - cytoch   | READ | 0.081176491  |
| UCK1 | Drug metabolism - other ε  | READ | 0.157800971  |
| UCK1 | E2f_targets                | READ | -0.232923256 |

|      |                              |        |              |
|------|------------------------------|--------|--------------|
| UCK1 | Ecm_receptor_interaction     | READ   | 0.14886106   |
| UCK1 | Effector cd4+ memory t       | ( READ | 0.024454883  |
| UCK1 | Effector cd8+ memory t       | ( READ | 0.169854514  |
| UCK1 | Effector memory t cell       | READ   | 0.077742817  |
| UCK1 | Effector regulatory t (treg  | READ   | 0.109782165  |
| UCK1 | Elvidge_hif1a_targets_up     | READ   | -0.290866632 |
| UCK1 | Endothelial cell             | READ   | 0.04403776   |
| UCK1 | Eosinophil                   | READ   | 0.208035975  |
| UCK1 | Ether lipid metabolism       | READ   | 0.043330827  |
| UCK1 | Exhausted cd4+ t cell        | READ   | 0.056412768  |
| UCK1 | Exhausted cd8+ t cell        | READ   | 0.070698866  |
| UCK1 | Exhausted t cell             | READ   | 0.161641646  |
| UCK1 | Fat cell (adipocyte)         | READ   | 0.199502027  |
| UCK1 | Fatty acid biosynthesis      | READ   | -0.239979608 |
| UCK1 | Fatty acid degradation       | READ   | -0.142909751 |
| UCK1 | Fatty acid elongation        | READ   | 0.076819579  |
| UCK1 | Fibroblast                   | READ   | 0.150079278  |
| UCK1 | Folate biosynthesis          | READ   | 0.22348936   |
| UCK1 | Follicular b cell            | READ   | 0.120018107  |
| UCK1 | Follicular dendritic cell    | READ   | 0.143787964  |
| UCK1 | Follicular helper (tfh) t ce | READ   | 0.162209882  |
| UCK1 | Follicular t cell            | READ   | 0.13468507   |
| UCK1 | Foxp3+il-17+ t cell          | READ   | 0.0970956    |
| UCK1 | Fructose and mannose me      | READ   | 0.207015018  |
| UCK1 | G2m_checkpoint               | READ   | -0.277648788 |
| UCK1 | Galactose metabolism         | READ   | 0.231617984  |
| UCK1 | Galie_tumor_stemness_ge      | READ   | 0.119676431  |
| UCK1 | Glutathione metabolism       | READ   | 0.095951132  |
| UCK1 | Glycerolipid metabolism      | READ   | -0.004800229 |
| UCK1 | Glycerophospholipid metæ     | READ   | 0.145985828  |
| UCK1 | Glycine, serine and threor   | READ   | 0.286432005  |
| UCK1 | Glycolysis / gluconeogene    | READ   | 0.041701071  |
| UCK1 | Glycosaminoglycan biosy      | READ   | 0.409687438  |
| UCK1 | Glycosaminoglycan biosy      | READ   | 0.182399159  |
| UCK1 | Glycosaminoglycan biosy      | READ   | 0.183428268  |
| UCK1 | Glycosaminoglycan degra      | READ   | 0.245278855  |
| UCK1 | Glycosphingolipid biosyn     | READ   | 0.321900727  |
| UCK1 | Glycosphingolipid biosyn     | READ   | 0.241949868  |
| UCK1 | Glycosphingolipid biosyn     | READ   | 0.17964381   |
| UCK1 | Glycosylphosphatidylinos     | READ   | -0.113498922 |
| UCK1 | Glyoxylate and dicarboxy     | READ   | 0.015128693  |
| UCK1 | Granulocyte                  | READ   | 0.15798243   |
| UCK1 | Hedgehog_signaling           | READ   | 0.051265768  |

|      |                             |      |              |
|------|-----------------------------|------|--------------|
| UCK1 | Histidine metabolism        | READ | 0.133163403  |
| UCK1 | Hypoxia                     | READ | 0.171768507  |
| UCK1 | Il-17alpha t cell           | READ | 0.123463891  |
| UCK1 | Il2_stat5_signaling         | READ | 0.129616406  |
| UCK1 | Il6_jak_stat3_signaling     | READ | 0.12819649   |
| UCK1 | Immune_checkpoints_tun      | READ | 0.106201204  |
| UCK1 | Immune_inhibition_cytok     | READ | 0.137537253  |
| UCK1 | Inositol phosphate metabo   | READ | -0.303465667 |
| UCK1 | Interleukin_6_signaling     | READ | -0.1543513   |
| UCK1 | Jaeger_metastasis_up        | READ | 0.067231153  |
| UCK1 | Jain_nfkb_signaling         | READ | -0.239104422 |
| UCK1 | Kras_signaling_up           | READ | 0.076512813  |
| UCK1 | Linoleic acid metabolism    | READ | 0.13846084   |
| UCK1 | Lipoic acid metabolism      | READ | 0.009454705  |
| UCK1 | Lysine degradation          | READ | -0.123312171 |
| UCK1 | Lysosome                    | READ | 0.28085153   |
| UCK1 | M1 macrophage               | READ | 0.145758831  |
| UCK1 | M2 macrophage               | READ | 0.175060084  |
| UCK1 | Mannose type o-glycan bi    | READ | 0.267033462  |
| UCK1 | Mapk_signaling_pathway      | READ | 0.081251434  |
| UCK1 | Mapk3_erk1_activation       | READ | -0.182451718 |
| UCK1 | Marginal zone b cell        | READ | 0.081369277  |
| UCK1 | Memory b cell               | READ | 0.077645384  |
| UCK1 | Mesenchymal cell            | READ | 0.254480841  |
| UCK1 | Mesenchymal stem cell       | READ | 0.101384344  |
| UCK1 | Metabolism of xenobiotic    | READ | 0.146339608  |
| UCK1 | Migrating cancer stem cel   | READ | -0.263116676 |
| UCK1 | Mitotic_spindle             | READ | -0.275540203 |
| UCK1 | Monocyte                    | READ | 0.153296198  |
| UCK1 | Mtor_signaling_pathway      | READ | 0.034460554  |
| UCK1 | Mtorc1_signaling            | READ | -0.199772464 |
| UCK1 | Mucin type o-glycan biosy   | READ | -0.178972125 |
| UCK1 | Myc_targets_v1              | READ | -0.186904428 |
| UCK1 | Myeloid cell                | READ | 0.145622026  |
| UCK1 | N-glycan biosynthesis       | READ | 0.039656689  |
| UCK1 | Naive b cell                | READ | 0.060731596  |
| UCK1 | Naive cd4+ t cell           | READ | -0.035236598 |
| UCK1 | Naive cd8+ t cell           | READ | -0.073670234 |
| UCK1 | Natural killer cell         | READ | 0.159565172  |
| UCK1 | Natural killer t (nkt) cell | READ | -0.242831923 |
| UCK1 | Natural regulatory t (treg) | READ | 0.106070391  |
| UCK1 | Neomycin, kanamycin an      | READ | 0.225505347  |
| UCK1 | Neutrophil                  | READ | 0.148647835  |

|      |                            |      |              |
|------|----------------------------|------|--------------|
| UCK1 | Nicotinate and nicotinami  | READ | 0.104564007  |
| UCK1 | Nitrogen metabolism        | READ | 0.015102061  |
| UCK1 | Nod_like_receptor_signal   | READ | -0.033613416 |
| UCK1 | Notch_signaling            | READ | 0.193005038  |
| UCK1 | One carbon pool by folate  | READ | -0.157264185 |
| UCK1 | Other glycan degradation   | READ | 0.241415344  |
| UCK1 | Other types of o-glycan b  | READ | 0.358792851  |
| UCK1 | Oxidative phosphorylatio   | READ | 0.213836827  |
| UCK1 | P53_pathway                | READ | 0.121547297  |
| UCK1 | P53_signaling_pathway      | READ | -0.244459719 |
| UCK1 | Pantothenate and coa bios  | READ | 0.035640661  |
| UCK1 | Pentose and glucuronate i  | READ | -0.008055324 |
| UCK1 | Pentose phosphate pathwa   | READ | 0.083102802  |
| UCK1 | Pericyte                   | READ | 0.186257553  |
| UCK1 | Phenylalanine metabolism   | READ | 0.284214892  |
| UCK1 | Phenylalanine, tyrosine ar | READ | -0.021984247 |
| UCK1 | Phosphonate and phosphir   | READ | -0.027165202 |
| UCK1 | Pi3k_akt_activation        | READ | -0.110352868 |
| UCK1 | Pi3k_akt_mtor_signaling    | READ | -0.092098607 |
| UCK1 | Porphyrin and chlorophyl   | READ | 0.165494984  |
| UCK1 | Primary bile acid biosynt  | READ | 0.213809028  |
| UCK1 | Propanoate metabolism      | READ | -0.25703532  |
| UCK1 | Purine metabolism          | READ | 0.099989542  |
| UCK1 | Pyrimidine metabolism      | READ | 0.124487497  |
| UCK1 | Pyruvate metabolism        | READ | -0.024786606 |
| UCK1 | Regulation_of_autophagy    | READ | -0.0304567   |
| UCK1 | Retinol metabolism         | READ | 0.077330509  |
| UCK1 | Riboflavin metabolism      | READ | 0.357074073  |
| UCK1 | Schmahl_pdgf_signaling     | READ | -0.052234795 |
| UCK1 | Selenocompound metabol     | READ | -0.249583637 |
| UCK1 | Signaling_by_hippo         | READ | -0.2495426   |
| UCK1 | Sphingolipid metabolism    | READ | -0.019728833 |
| UCK1 | Starch and sucrose metabo  | READ | 0.047623959  |
| UCK1 | Steroid biosynthesis       | READ | -0.119990381 |
| UCK1 | Steroid hormone biosynth   | READ | 0.218485627  |
| UCK1 | Sulfur metabolism          | READ | -0.13062799  |
| UCK1 | Synthesis and degradation  | READ | -0.030563095 |
| UCK1 | T helper cell              | READ | 0.174230089  |
| UCK1 | T helper1 (th1) cell       | READ | 0.084522761  |
| UCK1 | T helper17 (th17) cell     | READ | 0.070815168  |
| UCK1 | T helper2 (th2) cell       | READ | 0.211118039  |
| UCK1 | T helper9 (th9) cell       | READ | 0.164291509  |
| UCK1 | Taurine and hypotaurine r  | READ | 0.217895524  |

|      |                            |      |              |
|------|----------------------------|------|--------------|
| UCK1 | Terpenoid backbone biosy   | READ | -0.133276512 |
| UCK1 | Tgf_beta_signaling_pathw   | READ | -0.038392348 |
| UCK1 | Thiamine metabolism        | READ | 0.294601588  |
| UCK1 | Tnfa_signaling_via_nfkb    | READ | 0.021815248  |
| UCK1 | Tryptophan metabolism      | READ | 0.081043965  |
| UCK1 | Tumor endothelial cell     | READ | 0.083551981  |
| UCK1 | Tyrosine metabolism        | READ | 0.32661661   |
| UCK1 | Ubiquinone and other terf  | READ | -0.012545604 |
| UCK1 | Valine, leucine and isoleu | READ | 0.213917056  |
| UCK1 | Valine, leucine and isoleu | READ | -0.157854606 |
| UCK1 | Vascular endothelial cell  | READ | 0.207229028  |
| UCK1 | Vascular smooth muscle c   | READ | 0.28376049   |
| UCK1 | Vegf_signaling_pathway     | READ | 0.095501639  |
| UCK1 | Vitamin b6 metabolism      | READ | -0.05769188  |
| UCK1 | Willert_wnt_signaling      | READ | -0.053712125 |
| UCK1 | Wnt_beta_catenin_signali   | READ | 0.072920416  |
| UCK2 | Abnormal plasma cell       | READ | 0.008707269  |
| UCK2 | Activated b cell           | READ | 0.013756135  |
| UCK2 | Activated cd4+ t cell      | READ | -0.037114736 |
| UCK2 | Activated t cell           | READ | 0.066825225  |
| UCK2 | Alanine, aspartate and glu | READ | 0.202866182  |
| UCK2 | Alcala_apoptosis           | READ | 0.314090949  |
| UCK2 | Alpha-linolenic acid meta  | READ | -0.131425745 |
| UCK2 | Amino sugar and nucleoti   | READ | 0.075479138  |
| UCK2 | Ampk_pathway               | READ | 0.283415777  |
| UCK2 | Angiogenesis               | READ | 0.016552447  |
| UCK2 | Arachidonic acid metabol   | READ | -0.148093258 |
| UCK2 | Arginine and proline metε  | READ | 0.306890367  |
| UCK2 | Arginine biosynthesis      | READ | 0.142417877  |
| UCK2 | Ascorbate and aldarate mε  | READ | 0.050358809  |
| UCK2 | Atypical memory b cell     | READ | 0.018253673  |
| UCK2 | Axl+siglec6+ dendritic ce  | READ | -0.095734485 |
| UCK2 | B cell                     | READ | 0.029013635  |
| UCK2 | B1 cell                    | READ | 0.025565878  |
| UCK2 | Basal cell                 | READ | 0.048655619  |
| UCK2 | Beta-alanine metabolism    | READ | 0.101801278  |
| UCK2 | Biosynthesis of unsaturate | READ | 0.226212     |
| UCK2 | Biotin metabolism          | READ | 0.05968913   |
| UCK2 | Butanoate metabolism       | READ | 0.033611928  |
| UCK2 | Caffeine metabolism        | READ | 0.041482844  |
| UCK2 | Cancer stem cell           | READ | -0.037301315 |
| UCK2 | Cancer stem-like cell      | READ | -0.029007806 |
| UCK2 | Cd4+ cytotoxic t cell      | READ | -0.035055332 |



|      |                              |      |              |
|------|------------------------------|------|--------------|
| UCK2 | Cd4+ memory t cell           | READ | 0.064203014  |
| UCK2 | Cd4+ regulatory t cell       | READ | -0.053805592 |
| UCK2 | Cd4+ t helper cell           | READ | -0.052726483 |
| UCK2 | Cd4+cd25+ regulatory t c     | READ | -0.027871277 |
| UCK2 | Cd8+ cytotoxic t cell        | READ | 0.025717529  |
| UCK2 | Cd8+ regulatory t cell       | READ | 0.020734637  |
| UCK2 | Cell_cycle                   | READ | 0.360286326  |
| UCK2 | Chandran_metastasis_top5     | READ | 0.296696932  |
| UCK2 | Citrate cycle (tca cycle)    | READ | 0.148636913  |
| UCK2 | Cysteine and methionine r    | READ | 0.251835078  |
| UCK2 | Cytokine induced killer cε   | READ | 0.071326401  |
| UCK2 | D-arginine and d-ornithin    | READ | -0.058879155 |
| UCK2 | D-glutamine and d-glutan     | READ | -0.076023059 |
| UCK2 | Dendritic cell               | READ | 0.00805261   |
| UCK2 | Dna_repair                   | READ | 0.395163197  |
| UCK2 | Dna_replication              | READ | 0.416953975  |
| UCK2 | Double-negative memory       | READ | 0.031755189  |
| UCK2 | Drug metabolism - cytoch     | READ | -0.12355404  |
| UCK2 | Drug metabolism - other ε    | READ | 0.198068799  |
| UCK2 | E2f_targets                  | READ | 0.391414008  |
| UCK2 | Ecm_receptor_interaction     | READ | -0.004880095 |
| UCK2 | Effector cd4+ memory t (     | READ | -0.051203491 |
| UCK2 | Effector cd8+ memory t (     | READ | -0.034422747 |
| UCK2 | Effector memory t cell       | READ | -0.041864019 |
| UCK2 | Effector regulatory t (treg  | READ | -0.093620157 |
| UCK2 | Elvidge_hif1a_targets_up     | READ | 0.264571222  |
| UCK2 | Endothelial cell             | READ | 0.082416654  |
| UCK2 | Eosinophil                   | READ | -0.005310834 |
| UCK2 | Ether lipid metabolism       | READ | -0.170071767 |
| UCK2 | Exhausted cd4+ t cell        | READ | -0.072507319 |
| UCK2 | Exhausted cd8+ t cell        | READ | -0.041092283 |
| UCK2 | Exhausted t cell             | READ | 0.075366274  |
| UCK2 | Fat cell (adipocyte)         | READ | 0.166342967  |
| UCK2 | Fatty acid biosynthesis      | READ | 0.258224815  |
| UCK2 | Fatty acid degradation       | READ | 0.002368881  |
| UCK2 | Fatty acid elongation        | READ | 0.20567576   |
| UCK2 | Fibroblast                   | READ | -0.106844797 |
| UCK2 | Folate biosynthesis          | READ | 0.089701278  |
| UCK2 | Follicular b cell            | READ | 0.026703682  |
| UCK2 | Follicular dendritic cell    | READ | 0.089282327  |
| UCK2 | Follicular helper (tfh) t cε | READ | 0.003081163  |
| UCK2 | Follicular t cell            | READ | 0.155253779  |
| UCK2 | Foxp3+il-17+ t cell          | READ | 0.167370887  |

|      |                            |      |              |
|------|----------------------------|------|--------------|
| UCK2 | Fructose and mannose me    | READ | 0.249359055  |
| UCK2 | G2m_checkpoint             | READ | 0.380663999  |
| UCK2 | Galactose metabolism       | READ | 0.095302204  |
| UCK2 | Galie_tumor_stemness_ge    | READ | -0.002930927 |
| UCK2 | Glutathione metabolism     | READ | 0.089197253  |
| UCK2 | Glycerolipid metabolism    | READ | 0.059980562  |
| UCK2 | Glycerophospholipid metæ   | READ | -0.118614562 |
| UCK2 | Glycine, serine and threor | READ | 0.196000815  |
| UCK2 | Glycolysis / gluconeogene  | READ | 0.23810796   |
| UCK2 | Glycosaminoglycan biosy1   | READ | -0.023125307 |
| UCK2 | Glycosaminoglycan biosy1   | READ | -0.112347204 |
| UCK2 | Glycosaminoglycan biosy1   | READ | 0.131087419  |
| UCK2 | Glycosaminoglycan degra    | READ | -0.206062849 |
| UCK2 | Glycosphingolipid biosyn1  | READ | -0.134896394 |
| UCK2 | Glycosphingolipid biosyn1  | READ | -0.007874131 |
| UCK2 | Glycosphingolipid biosyn1  | READ | 0.008438464  |
| UCK2 | Glycosylphosphatidylinos   | READ | 0.053358471  |
| UCK2 | Glyoxylate and dicarboxy   | READ | 0.268492426  |
| UCK2 | Granulocyte                | READ | -0.052697706 |
| UCK2 | Hedgehog_signaling         | READ | -0.102425423 |
| UCK2 | Histidine metabolism       | READ | 0.137141647  |
| UCK2 | Hypoxia                    | READ | 0.014959155  |
| UCK2 | Il-17ralpha t cell         | READ | 0.068527147  |
| UCK2 | Il2_stat5_signaling        | READ | 0.046431497  |
| UCK2 | Il6_jak_stat3_signaling    | READ | -0.093049386 |
| UCK2 | Immune_checkpoints_tunr    | READ | 0.066597125  |
| UCK2 | Immune_inhibition_cytok    | READ | -0.039733721 |
| UCK2 | Inositol phosphate metabo  | READ | -0.121573964 |
| UCK2 | Interleukin_6_signaling    | READ | 0.011894465  |
| UCK2 | Jaeger_metastasis_up       | READ | 0.225676979  |
| UCK2 | Jain_nfkb_signaling        | READ | 0.258965282  |
| UCK2 | Kras_signaling_up          | READ | -0.060821288 |
| UCK2 | Linoleic acid metabolism   | READ | -0.08786323  |
| UCK2 | Lipoic acid metabolism     | READ | -0.024220474 |
| UCK2 | Lysine degradation         | READ | 0.260061227  |
| UCK2 | Lysosome                   | READ | -0.257418438 |
| UCK2 | M1 macrophage              | READ | -0.01749115  |
| UCK2 | M2 macrophage              | READ | -0.057249844 |
| UCK2 | Mannose type o-glycan bi   | READ | 0.279120272  |
| UCK2 | Mapk_signaling_pathway     | READ | -0.1072239   |
| UCK2 | Mapk3_erk1_activation      | READ | 0.06182126   |
| UCK2 | Marginal zone b cell       | READ | 0.082220816  |
| UCK2 | Memory b cell              | READ | 0.044586481  |

|      |                             |      |              |
|------|-----------------------------|------|--------------|
| UCK2 | Mesenchymal cell            | READ | -0.043922914 |
| UCK2 | Mesenchymal stem cell       | READ | -0.089515432 |
| UCK2 | Metabolism of xenobiotic    | READ | -0.08149556  |
| UCK2 | Migrating cancer stem cel   | READ | 0.026789695  |
| UCK2 | Mitotic_spindle             | READ | 0.184762738  |
| UCK2 | Monocyte                    | READ | -0.065158301 |
| UCK2 | Mtor_signaling_pathway      | READ | -0.060757422 |
| UCK2 | Mtorc1_signaling            | READ | 0.330878659  |
| UCK2 | Mucin type o-glycan biosy   | READ | -0.05707606  |
| UCK2 | Myc_targets_v1              | READ | 0.377310558  |
| UCK2 | Myeloid cell                | READ | -0.051377593 |
| UCK2 | N-glycan biosynthesis       | READ | -0.000855175 |
| UCK2 | Naive b cell                | READ | 0.056293103  |
| UCK2 | Naive cd4+ t cell           | READ | -0.173316785 |
| UCK2 | Naive cd8+ t cell           | READ | -0.174231793 |
| UCK2 | Natural killer cell         | READ | 0.031853669  |
| UCK2 | Natural killer t (nkt) cell | READ | 0.086711302  |
| UCK2 | Natural regulatory t (treg) | READ | -0.025716269 |
| UCK2 | Neomycin, kanamycin and     | READ | 0.062092136  |
| UCK2 | Neutrophil                  | READ | 0.045461902  |
| UCK2 | Nicotinate and nicotinami   | READ | -0.129723892 |
| UCK2 | Nitrogen metabolism         | READ | 0.162223923  |
| UCK2 | Nod_like_receptor_signal    | READ | -0.070340368 |
| UCK2 | Notch_signaling             | READ | 0.023590802  |
| UCK2 | One carbon pool by folate   | READ | 0.443717435  |
| UCK2 | Other glycan degradation    | READ | -0.239042426 |
| UCK2 | Other types of o-glycan b   | READ | -0.077450407 |
| UCK2 | Oxidative phosphorylatio    | READ | 0.239546945  |
| UCK2 | P53_pathway                 | READ | -0.03045361  |
| UCK2 | P53_signaling_pathway       | READ | 0.037529861  |
| UCK2 | Pantothenate and coa bios   | READ | 0.035482053  |
| UCK2 | Pentose and glucuronate i   | READ | 0.014730981  |
| UCK2 | Pentose phosphate pathwa    | READ | 0.149344092  |
| UCK2 | Pericyte                    | READ | -0.075333115 |
| UCK2 | Phenylalanine metabolism    | READ | 0.129009192  |
| UCK2 | Phenylalanine, tyrosine ar  | READ | 0.082703281  |
| UCK2 | Phosphonate and phosphir    | READ | -0.115289621 |
| UCK2 | Pi3k_akt_activation         | READ | -0.240545694 |
| UCK2 | Pi3k_akt_mtor_signaling     | READ | 0.077180995  |
| UCK2 | Porphyrin and chlorophyl    | READ | 0.24486159   |
| UCK2 | Primary bile acid biosynt   | READ | -0.117863827 |
| UCK2 | Propanoate metabolism       | READ | 0.082821153  |
| UCK2 | Purine metabolism           | READ | 0.466645945  |

|       |                            |      |              |
|-------|----------------------------|------|--------------|
| UCK2  | Pyrimidine metabolism      | READ | 0.458911667  |
| UCK2  | Pyruvate metabolism        | READ | 0.202759026  |
| UCK2  | Regulation_of_autophagy    | READ | -0.257222169 |
| UCK2  | Retinol metabolism         | READ | -0.034319348 |
| UCK2  | Riboflavin metabolism      | READ | 0.201161013  |
| UCK2  | Schmahl_pdgf_signaling     | READ | -0.211045259 |
| UCK2  | Selenocompound metabol     | READ | 0.186984362  |
| UCK2  | Signaling_by_hippo         | READ | -0.034144501 |
| UCK2  | Sphingolipid metabolism    | READ | -0.293644092 |
| UCK2  | Starch and sucrose metabo  | READ | -0.052018643 |
| UCK2  | Steroid biosynthesis       | READ | 0.169464144  |
| UCK2  | Steroid hormone biosynth   | READ | -0.043560268 |
| UCK2  | Sulfur metabolism          | READ | 0.035660128  |
| UCK2  | Synthesis and degradation  | READ | 0.118937658  |
| UCK2  | T helper cell              | READ | -0.018836849 |
| UCK2  | T helper1 (th1) cell       | READ | 0.019276212  |
| UCK2  | T helper17 (th17) cell     | READ | 0.070416825  |
| UCK2  | T helper2 (th2) cell       | READ | 0.07208467   |
| UCK2  | T helper9 (th9) cell       | READ | -0.123457583 |
| UCK2  | Taurine and hypotaurine r  | READ | -0.230256573 |
| UCK2  | Terpenoid backbone biosy   | READ | 0.271033719  |
| UCK2  | Tgf_beta_signaling_pathw   | READ | -0.077649537 |
| UCK2  | Thiamine metabolism        | READ | 0.177415442  |
| UCK2  | Tnfa_signaling_via_nfkb    | READ | -0.05103762  |
| UCK2  | Tryptophan metabolism      | READ | 0.129421248  |
| UCK2  | Tumor endothelial cell     | READ | 0.133682258  |
| UCK2  | Tyrosine metabolism        | READ | 0.035142914  |
| UCK2  | Ubiquinone and other terp  | READ | 0.287396602  |
| UCK2  | Valine, leucine and isoleu | READ | 0.037105778  |
| UCK2  | Valine, leucine and isoleu | READ | 0.064551779  |
| UCK2  | Vascular endothelial cell  | READ | 0.039888924  |
| UCK2  | Vascular smooth muscle c   | READ | -0.078532412 |
| UCK2  | Vegf_signaling_pathway     | READ | -0.122827672 |
| UCK2  | Vitamin b6 metabolism      | READ | -0.080656256 |
| UCK2  | Willert_wnt_signaling      | READ | 0.178477327  |
| UCK2  | Wnt_beta_catenin_signali   | READ | -0.018077946 |
| UCKL1 | Abnormal plasma cell       | READ | -0.209162125 |
| UCKL1 | Activated b cell           | READ | -0.327006718 |
| UCKL1 | Activated cd4+ t cell      | READ | -0.156088604 |
| UCKL1 | Activated t cell           | READ | -0.115886484 |
| UCKL1 | Alanine, aspartate and glu | READ | 0.031252002  |
| UCKL1 | Alcala_apoptosis           | READ | -0.156334948 |
| UCKL1 | Alpha-linolenic acid meta  | READ | 0.160952608  |

|       |                                      |      |              |
|-------|--------------------------------------|------|--------------|
| UCKL1 | Amino sugar and nucleoti             | READ | -0.100513189 |
| UCKL1 | Ampk_pathway                         | READ | 0.257705778  |
| UCKL1 | Angiogenesis                         | READ | -0.07957529  |
| UCKL1 | Arachidonic acid metabol             | READ | 0.132148983  |
| UCKL1 | Arginine and proline metε            | READ | -0.020689763 |
| UCKL1 | Arginine biosynthesis                | READ | 0.123990736  |
| UCKL1 | Ascorbate and aldarate mε            | READ | -0.140390193 |
| UCKL1 | Atypical memory b cell               | READ | -0.210313857 |
| UCKL1 | Axl+siglec6+ dendritic ce            | READ | -0.197369082 |
| UCKL1 | B cell                               | READ | -0.353942916 |
| UCKL1 | B1 cell                              | READ | -0.175498694 |
| UCKL1 | Basal cell                           | READ | -0.064814707 |
| UCKL1 | Beta-alanine metabolism              | READ | -0.175091906 |
| UCKL1 | Biosynthesis of unsaturate           | READ | -0.079530837 |
| UCKL1 | Biotin metabolism                    | READ | -0.152752901 |
| UCKL1 | Butanoate metabolism                 | READ | -0.120325356 |
| UCKL1 | Caffeine metabolism                  | READ | -0.12497054  |
| UCKL1 | Cancer stem cell                     | READ | -0.312404824 |
| UCKL1 | Cancer stem-like cell                | READ | -0.121994143 |
| UCKL1 | Cd4+ cytotoxic t cell                | READ | -0.180595764 |
| UCKL1 | Cd4+ memory t cell                   | READ | -0.046607047 |
| UCKL1 | Cd4+ regulatory t cell               | READ | 0.00625394   |
| UCKL1 | Cd4+ t helper cell                   | READ | -0.103383016 |
| UCKL1 | Cd4+cd25+ regulatory t c             | READ | -0.117873143 |
| UCKL1 | Cd8+ cytotoxic t cell                | READ | -0.02307782  |
| UCKL1 | Cd8+ regulatory t cell               | READ | -0.209262538 |
| UCKL1 | Cell_cycle                           | READ | -0.191394881 |
| UCKL1 | Chandran_metastasis_top <sup>5</sup> | READ | -0.185132896 |
| UCKL1 | Citrate cycle (tca cycle)            | READ | -0.098627816 |
| UCKL1 | Cysteine and methionine r            | READ | -0.023679167 |
| UCKL1 | Cytokine induced killer cε           | READ | -0.031410506 |
| UCKL1 | D-arginine and d-ornithin            | READ | -0.147834738 |
| UCKL1 | D-glutamine and d-glutan             | READ | -0.043956698 |
| UCKL1 | Dendritic cell                       | READ | -0.099438014 |
| UCKL1 | Dna_repair                           | READ | 0.090370058  |
| UCKL1 | Dna_replication                      | READ | -0.076611158 |
| UCKL1 | Double-negative memory               | READ | 0.046837698  |
| UCKL1 | Drug metabolism - cytoch             | READ | -0.08497802  |
| UCKL1 | Drug metabolism - other ε            | READ | 0.069251699  |
| UCKL1 | E2f_targets                          | READ | -0.219468361 |
| UCKL1 | Ecm_receptor_interaction             | READ | -0.093274074 |
| UCKL1 | Effector cd4+ memory t (             | READ | -0.225944182 |
| UCKL1 | Effector cd8+ memory t (             | READ | -0.155639915 |

|       |                              |      |              |
|-------|------------------------------|------|--------------|
| UCKL1 | Effector memory t cell       | READ | -0.203002348 |
| UCKL1 | Effector regulatory t (treg  | READ | -0.119447144 |
| UCKL1 | Elvidge_hif1a_targets_up     | READ | -0.265876494 |
| UCKL1 | Endothelial cell             | READ | -0.308566623 |
| UCKL1 | Eosinophil                   | READ | -0.088528765 |
| UCKL1 | Ether lipid metabolism       | READ | -0.052673763 |
| UCKL1 | Exhausted cd4+ t cell        | READ | -0.37034639  |
| UCKL1 | Exhausted cd8+ t cell        | READ | -0.326849095 |
| UCKL1 | Exhausted t cell             | READ | -0.139005159 |
| UCKL1 | Fat cell (adipocyte)         | READ | -0.110758452 |
| UCKL1 | Fatty acid biosynthesis      | READ | -0.117946963 |
| UCKL1 | Fatty acid degradation       | READ | -0.192819457 |
| UCKL1 | Fatty acid elongation        | READ | -0.224603929 |
| UCKL1 | Fibroblast                   | READ | -0.204381405 |
| UCKL1 | Folate biosynthesis          | READ | 0.040246836  |
| UCKL1 | Follicular b cell            | READ | -0.182424669 |
| UCKL1 | Follicular dendritic cell    | READ | -0.227301509 |
| UCKL1 | Follicular helper (tfh) t ce | READ | -0.09714042  |
| UCKL1 | Follicular t cell            | READ | 0.027184099  |
| UCKL1 | Foxp3+il-17+ t cell          | READ | 0.104310772  |
| UCKL1 | Fructose and mannose me      | READ | 0.190175223  |
| UCKL1 | G2m_checkpoint               | READ | -0.27759958  |
| UCKL1 | Galactose metabolism         | READ | 0.065719596  |
| UCKL1 | Galie_tumor_stemness_ge      | READ | -0.035064944 |
| UCKL1 | Glutathione metabolism       | READ | 0.115486942  |
| UCKL1 | Glycerolipid metabolism      | READ | 0.159763787  |
| UCKL1 | Glycerophospholipid metæ     | READ | 0.327946902  |
| UCKL1 | Glycine, serine and threor   | READ | 0.163104056  |
| UCKL1 | Glycolysis / gluconeogene    | READ | 0.035223833  |
| UCKL1 | Glycosaminoglycan biosy      | READ | 0.218124614  |
| UCKL1 | Glycosaminoglycan biosy      | READ | 0.173920242  |
| UCKL1 | Glycosaminoglycan biosy      | READ | -0.111094975 |
| UCKL1 | Glycosaminoglycan degra      | READ | 0.110341501  |
| UCKL1 | Glycosphingolipid biosyn     | READ | 0.036866388  |
| UCKL1 | Glycosphingolipid biosyn     | READ | 0.112183948  |
| UCKL1 | Glycosphingolipid biosyn     | READ | -0.09627828  |
| UCKL1 | Glycosylphosphatidylinos     | READ | -0.09307129  |
| UCKL1 | Glyoxylate and dicarboxy     | READ | -0.010475524 |
| UCKL1 | Granulocyte                  | READ | -0.156432901 |
| UCKL1 | Hedgehog_signaling           | READ | 0.03128824   |
| UCKL1 | Histidine metabolism         | READ | -0.033460578 |
| UCKL1 | Hypoxia                      | READ | -0.158130075 |
| UCKL1 | Il-17ralpha t cell           | READ | -0.080823596 |

|       |                             |      |              |
|-------|-----------------------------|------|--------------|
| UCKL1 | Il2_stat5_signaling         | READ | -0.153622186 |
| UCKL1 | Il6_jak_stat3_signaling     | READ | -0.140258493 |
| UCKL1 | Immune_checkpoints_tunr     | READ | -0.191799134 |
| UCKL1 | Immune_inhibition_cytok     | READ | 0.019110545  |
| UCKL1 | Inositol phosphate metabo   | READ | -0.332485329 |
| UCKL1 | Interleukin_6_signaling     | READ | -0.24683229  |
| UCKL1 | Jaeger_metastasis_up        | READ | -0.290964644 |
| UCKL1 | Jain_nfkb_signaling         | READ | 0.003383028  |
| UCKL1 | Kras_signaling_up           | READ | -0.256300796 |
| UCKL1 | Linoleic acid metabolism    | READ | 0.056399356  |
| UCKL1 | Lipoic acid metabolism      | READ | -0.093596918 |
| UCKL1 | Lysine degradation          | READ | 0.005309362  |
| UCKL1 | Lysosome                    | READ | -0.023511218 |
| UCKL1 | M1 macrophage               | READ | -0.222541079 |
| UCKL1 | M2 macrophage               | READ | -0.216992016 |
| UCKL1 | Mannose type o-glycan bi    | READ | 0.233626726  |
| UCKL1 | Mapk_signaling_pathway      | READ | -0.142847525 |
| UCKL1 | Mapk3_erk1_activation       | READ | -0.266488352 |
| UCKL1 | Marginal zone b cell        | READ | -0.274641696 |
| UCKL1 | Memory b cell               | READ | -0.339729169 |
| UCKL1 | Mesenchymal cell            | READ | 0.036901517  |
| UCKL1 | Mesenchymal stem cell       | READ | -0.169968372 |
| UCKL1 | Metabolism of xenobiotic    | READ | 0.018893999  |
| UCKL1 | Migrating cancer stem cel   | READ | -0.372398232 |
| UCKL1 | Mitotic_spindle             | READ | -0.244519266 |
| UCKL1 | Monocyte                    | READ | -0.246857382 |
| UCKL1 | Mtor_signaling_pathway      | READ | 0.067562359  |
| UCKL1 | Mtorc1_signaling            | READ | -0.327216402 |
| UCKL1 | Mucin type o-glycan biosy   | READ | -0.414294662 |
| UCKL1 | Myc_targets_v1              | READ | -0.18599686  |
| UCKL1 | Myeloid cell                | READ | -0.173672535 |
| UCKL1 | N-glycan biosynthesis       | READ | -0.091370284 |
| UCKL1 | Naive b cell                | READ | -0.117339565 |
| UCKL1 | Naive cd4+ t cell           | READ | -0.203582602 |
| UCKL1 | Naive cd8+ t cell           | READ | -0.163703569 |
| UCKL1 | Natural killer cell         | READ | -0.190212866 |
| UCKL1 | Natural killer t (nkt) cell | READ | -0.500356353 |
| UCKL1 | Natural regulatory t (treg) | READ | -0.153437217 |
| UCKL1 | Neomycin, kanamycin an      | READ | 0.06907101   |
| UCKL1 | Neutrophil                  | READ | -0.228577279 |
| UCKL1 | Nicotinate and nicotinami   | READ | -0.071738555 |
| UCKL1 | Nitrogen metabolism         | READ | -0.340796086 |
| UCKL1 | Nod_like_receptor_signal    | READ | -0.157892693 |

|       |                            |      |              |
|-------|----------------------------|------|--------------|
| UCKL1 | Notch_signaling            | READ | -0.02969136  |
| UCKL1 | One carbon pool by folate  | READ | -0.193968178 |
| UCKL1 | Other glycan degradation   | READ | 0.161835032  |
| UCKL1 | Other types of o-glycan b  | READ | 0.455130438  |
| UCKL1 | Oxidative phosphorylatior  | READ | 0.001535785  |
| UCKL1 | P53_pathway                | READ | -0.047872352 |
| UCKL1 | P53_signaling_pathway      | READ | -0.290267639 |
| UCKL1 | Pantothenate and coa bios  | READ | -0.290731363 |
| UCKL1 | Pentose and glucuronate i  | READ | -0.119772157 |
| UCKL1 | Pentose phosphate pathwa   | READ | 0.124128465  |
| UCKL1 | Pericyte                   | READ | -0.080910703 |
| UCKL1 | Phenylalanine metabolism   | READ | 0.02907441   |
| UCKL1 | Phenylalanine, tyrosine ar | READ | -0.086919533 |
| UCKL1 | Phosphonate and phosphir   | READ | -0.202087455 |
| UCKL1 | Pi3k_akt_activation        | READ | -0.148317324 |
| UCKL1 | Pi3k_akt_mtor_signaling    | READ | -0.3187405   |
| UCKL1 | Porphyrin and chlorophyl   | READ | -0.037395159 |
| UCKL1 | Primary bile acid biosynt  | READ | 0.112272507  |
| UCKL1 | Propanoate metabolism      | READ | -0.346631378 |
| UCKL1 | Purine metabolism          | READ | 0.020927926  |
| UCKL1 | Pyrimidine metabolism      | READ | 0.097170537  |
| UCKL1 | Pyruvate metabolism        | READ | -0.045042861 |
| UCKL1 | Regulation_of_autophagy    | READ | 0.00828603   |
| UCKL1 | Retinol metabolism         | READ | -0.077154747 |
| UCKL1 | Riboflavin metabolism      | READ | 0.148944071  |
| UCKL1 | Schmahl_pdgf_signaling     | READ | -0.460211451 |
| UCKL1 | Selenocompound metabol     | READ | -0.010920481 |
| UCKL1 | Signaling_by_hippo         | READ | -0.168347865 |
| UCKL1 | Sphingolipid metabolism    | READ | -0.194023056 |
| UCKL1 | Starch and sucrose metabo  | READ | -0.128751531 |
| UCKL1 | Steroid biosynthesis       | READ | 0.045683007  |
| UCKL1 | Steroid hormone biosynth   | READ | -0.028086511 |
| UCKL1 | Sulfur metabolism          | READ | -0.170225642 |
| UCKL1 | Synthesis and degradation  | READ | -0.150180909 |
| UCKL1 | T helper cell              | READ | -0.173681484 |
| UCKL1 | T helper1 (th1) cell       | READ | -0.197663801 |
| UCKL1 | T helper17 (th17) cell     | READ | -0.042691679 |
| UCKL1 | T helper2 (th2) cell       | READ | -0.042841058 |
| UCKL1 | T helper9 (th9) cell       | READ | 0.111851414  |
| UCKL1 | Taurine and hypotaurine r  | READ | 0.384370412  |
| UCKL1 | Terpenoid backbone biosy   | READ | -0.368221645 |
| UCKL1 | Tgf_beta_signaling_pathw   | READ | -0.257400473 |
| UCKL1 | Thiamine metabolism        | READ | 0.002125246  |



|       |                            |      |              |
|-------|----------------------------|------|--------------|
| UCKL1 | Tnfa_signaling_via_nfk     | READ | -0.162665443 |
| UCKL1 | Tryptophan metabolism      | READ | -0.069589434 |
| UCKL1 | Tumor endothelial cell     | READ | -0.1252811   |
| UCKL1 | Tyrosine metabolism        | READ | 0.124335477  |
| UCKL1 | Ubiquinone and other ter   | READ | -0.159684502 |
| UCKL1 | Valine, leucine and isoleu | READ | 0.067572928  |
| UCKL1 | Valine, leucine and isoleu | READ | -0.282819232 |
| UCKL1 | Vascular endothelial cell  | READ | 0.101132221  |
| UCKL1 | Vascular smooth muscle c   | READ | 0.073113204  |
| UCKL1 | Vegf_signaling_pathway     | READ | 0.028535603  |
| UCKL1 | Vitamin b6 metabolism      | READ | 0.073682127  |
| UCKL1 | Willert_wnt_signaling      | READ | -0.174265246 |
| UCKL1 | Wnt_beta_catenin_signali   | READ | 0.168248863  |
| UPP1  | Abnormal plasma cell       | READ | -0.067153101 |
| UPP1  | Activated b cell           | READ | -0.105995739 |
| UPP1  | Activated cd4+ t cell      | READ | 0.246602775  |
| UPP1  | Activated t cell           | READ | 0.136236815  |
| UPP1  | Alanine, aspartate and glu | READ | -0.159521558 |
| UPP1  | Alcala_apoptosis           | READ | 0.118617413  |
| UPP1  | Alpha-linolenic acid meta  | READ | 0.049466413  |
| UPP1  | Amino sugar and nucleoti   | READ | 0.284007671  |
| UPP1  | Ampk_pathway               | READ | -0.084552873 |
| UPP1  | Angiogenesis               | READ | 0.241724905  |
| UPP1  | Arachidonic acid metabol   | READ | 0.369410149  |
| UPP1  | Arginine and proline metæ  | READ | 0.009256739  |
| UPP1  | Arginine biosynthesis      | READ | 0.011104955  |
| UPP1  | Ascorbate and aldarate mε  | READ | -0.136380393 |
| UPP1  | Atypical memory b cell     | READ | -0.084552833 |
| UPP1  | Axl+siglec6+ dendritic ce  | READ | 0.158950281  |
| UPP1  | B cell                     | READ | 0.009409734  |
| UPP1  | B1 cell                    | READ | -0.331907933 |
| UPP1  | Basal cell                 | READ | 0.515347979  |
| UPP1  | Beta-alanine metabolism    | READ | -0.069108027 |
| UPP1  | Biosynthesis of unsaturate | READ | -0.039395235 |
| UPP1  | Biotin metabolism          | READ | -0.159168756 |
| UPP1  | Butanoate metabolism       | READ | -0.209886754 |
| UPP1  | Caffeine metabolism        | READ | -0.137888417 |
| UPP1  | Cancer stem cell           | READ | 0.064797457  |
| UPP1  | Cancer stem-like cell      | READ | -0.031755431 |
| UPP1  | Cd4+ cytotoxic t cell      | READ | 0.194405579  |
| UPP1  | Cd4+ memory t cell         | READ | 0.060185746  |
| UPP1  | Cd4+ regulatory t cell     | READ | 0.227434322  |
| UPP1  | Cd4+ t helper cell         | READ | 0.151019015  |

|      |                                      |      |              |
|------|--------------------------------------|------|--------------|
| UPP1 | Cd4+cd25+ regulatory t c             | READ | 0.153282408  |
| UPP1 | Cd8+ cytotoxic t cell                | READ | 0.077372962  |
| UPP1 | Cd8+ regulatory t cell               | READ | 0.028833548  |
| UPP1 | Cell_cycle                           | READ | -0.218584713 |
| UPP1 | Chandran_metastasis_top <sup>5</sup> | READ | -0.315765133 |
| UPP1 | Citrate cycle (tca cycle)            | READ | -0.024650965 |
| UPP1 | Cysteine and methionine r            | READ | 0.062722977  |
| UPP1 | Cytokine induced killer c $\alpha$   | READ | 0.035003678  |
| UPP1 | D-arginine and d-ornithin            | READ | 0.085409618  |
| UPP1 | D-glutamine and d-glutan             | READ | -0.087045561 |
| UPP1 | Dendritic cell                       | READ | 0.250369233  |
| UPP1 | Dna_repair                           | READ | 0.086115415  |
| UPP1 | Dna_replication                      | READ | -0.065827673 |
| UPP1 | Double-negative memory               | READ | 0.02341086   |
| UPP1 | Drug metabolism - cytoch             | READ | 0.087830269  |
| UPP1 | Drug metabolism - other c            | READ | 0.201345642  |
| UPP1 | E2f_targets                          | READ | -0.222432273 |
| UPP1 | Ecm_receptor_interaction             | READ | 0.153214233  |
| UPP1 | Effector cd4+ memory t (             | READ | 0.080970499  |
| UPP1 | Effector cd8+ memory t (             | READ | 0.21752345   |
| UPP1 | Effector memory t cell               | READ | 0.106903939  |
| UPP1 | Effector regulatory t (treg          | READ | 0.212740504  |
| UPP1 | Elvidge_hif1a_targets_up             | READ | -0.121147065 |
| UPP1 | Endothelial cell                     | READ | 0.124606613  |
| UPP1 | Eosinophil                           | READ | 0.361776976  |
| UPP1 | Ether lipid metabolism               | READ | 0.080522456  |
| UPP1 | Exhausted cd4+ t cell                | READ | 0.134451834  |
| UPP1 | Exhausted cd8+ t cell                | READ | 0.156544196  |
| UPP1 | Exhausted t cell                     | READ | 0.094115668  |
| UPP1 | Fat cell (adipocyte)                 | READ | 0.021888888  |
| UPP1 | Fatty acid biosynthesis              | READ | -0.176471591 |
| UPP1 | Fatty acid degradation               | READ | -0.156155471 |
| UPP1 | Fatty acid elongation                | READ | 0.15286665   |
| UPP1 | Fibroblast                           | READ | 0.224377258  |
| UPP1 | Folate biosynthesis                  | READ | 0.213856721  |
| UPP1 | Follicular b cell                    | READ | 0.075288506  |
| UPP1 | Follicular dendritic cell            | READ | 0.056345788  |
| UPP1 | Follicular helper (tfh) t c $\alpha$ | READ | 0.160278459  |
| UPP1 | Follicular t cell                    | READ | 0.009307596  |
| UPP1 | Foxp3+il-17+ t cell                  | READ | -0.033978156 |
| UPP1 | Fructose and mannose me              | READ | 0.143480596  |
| UPP1 | G2m_checkpoint                       | READ | -0.327221415 |
| UPP1 | Galactose metabolism                 | READ | 0.306574899  |

|      |                            |      |              |
|------|----------------------------|------|--------------|
| UPP1 | Galie_tumor_stemness_ge    | READ | 0.117744701  |
| UPP1 | Glutathione metabolism     | READ | 0.348381258  |
| UPP1 | Glycerolipid metabolism    | READ | 0.039850289  |
| UPP1 | Glycerophospholipid metæ   | READ | 0.127196508  |
| UPP1 | Glycine, serine and threor | READ | 0.169953824  |
| UPP1 | Glycolysis / gluconeogene  | READ | 0.047296473  |
| UPP1 | Glycosaminoglycan biosy    | READ | 0.440394152  |
| UPP1 | Glycosaminoglycan biosy    | READ | 0.18003096   |
| UPP1 | Glycosaminoglycan biosy    | READ | 0.29747997   |
| UPP1 | Glycosaminoglycan degra    | READ | 0.24113301   |
| UPP1 | Glycosphingolipid biosyn   | READ | 0.344439624  |
| UPP1 | Glycosphingolipid biosyn   | READ | 0.290674797  |
| UPP1 | Glycosphingolipid biosyn   | READ | 0.145449673  |
| UPP1 | Glycosylphosphatidylinos   | READ | -0.146080039 |
| UPP1 | Glyoxylate and dicarboxy   | READ | -0.003517201 |
| UPP1 | Granulocyte                | READ | 0.34082396   |
| UPP1 | Hedgehog_signaling         | READ | -0.016943744 |
| UPP1 | Histidine metabolism       | READ | -0.052651057 |
| UPP1 | Hypoxia                    | READ | 0.194340131  |
| UPP1 | Il-17ralpha t cell         | READ | 0.069252973  |
| UPP1 | Il2_stat5_signaling        | READ | 0.15584394   |
| UPP1 | Il6_jak_stat3_signaling    | READ | 0.238223119  |
| UPP1 | Immune_checkpoints_tur     | READ | 0.235463013  |
| UPP1 | Immune_inhibition_cytok    | READ | 0.306871296  |
| UPP1 | Inositol phosphate metabo  | READ | -0.364852494 |
| UPP1 | Interleukin_6_signaling    | READ | -0.098965172 |
| UPP1 | Jaeger_metastasis_up       | READ | 0.029952977  |
| UPP1 | Jain_nfkb_signaling        | READ | -0.311027447 |
| UPP1 | Kras_signaling_up          | READ | 0.142409137  |
| UPP1 | Linoleic acid metabolism   | READ | 0.050559033  |
| UPP1 | Lipoic acid metabolism     | READ | 0.041907783  |
| UPP1 | Lysine degradation         | READ | -0.287309509 |
| UPP1 | Lysosome                   | READ | 0.368373102  |
| UPP1 | M1 macrophage              | READ | 0.281986895  |
| UPP1 | M2 macrophage              | READ | 0.325055331  |
| UPP1 | Mannose type o-glycan bi   | READ | 0.104644916  |
| UPP1 | Mapk_signaling_pathway     | READ | 0.022355123  |
| UPP1 | Mapk3_erk1_activation      | READ | -0.0499913   |
| UPP1 | Marginal zone b cell       | READ | 0.036871226  |
| UPP1 | Memory b cell              | READ | 0.042173802  |
| UPP1 | Mesenchymal cell           | READ | 0.345867364  |
| UPP1 | Mesenchymal stem cell      | READ | 0.205494858  |
| UPP1 | Metabolism of xenobiotic   | READ | 0.183716346  |

|      |                             |      |              |
|------|-----------------------------|------|--------------|
| UPP1 | Migrating cancer stem cel   | READ | -0.206952065 |
| UPP1 | Mitotic_spindle             | READ | -0.337427226 |
| UPP1 | Monocyte                    | READ | 0.349013409  |
| UPP1 | Mtor_signaling_pathway      | READ | -0.01967077  |
| UPP1 | Mtorc1_signaling            | READ | -0.010978849 |
| UPP1 | Mucin type o-glycan biosy   | READ | -0.177227454 |
| UPP1 | Myc_targets_v1              | READ | -0.154021131 |
| UPP1 | Myeloid cell                | READ | 0.233714997  |
| UPP1 | N-glycan biosynthesis       | READ | 0.008512532  |
| UPP1 | Naive b cell                | READ | -0.059166237 |
| UPP1 | Naive cd4+ t cell           | READ | -0.044628853 |
| UPP1 | Naive cd8+ t cell           | READ | -0.259542433 |
| UPP1 | Natural killer cell         | READ | 0.16833741   |
| UPP1 | Natural killer t (nkt) cell | READ | -0.143427481 |
| UPP1 | Natural regulatory t (treg) | READ | 0.158995342  |
| UPP1 | Neomycin, kanamycin an      | READ | 0.174883812  |
| UPP1 | Neutrophil                  | READ | 0.382732521  |
| UPP1 | Nicotinate and nicotinami   | READ | -0.03191467  |
| UPP1 | Nitrogen metabolism         | READ | 0.081879526  |
| UPP1 | Nod_like_receptor_signal    | READ | 0.14024878   |
| UPP1 | Notch_signaling             | READ | 0.062988426  |
| UPP1 | One carbon pool by folate   | READ | -0.11293042  |
| UPP1 | Other glycan degradation    | READ | 0.133993669  |
| UPP1 | Other types of o-glycan b   | READ | 0.088262854  |
| UPP1 | Oxidative phosphorylatio    | READ | 0.333064913  |
| UPP1 | P53_pathway                 | READ | 0.103080822  |
| UPP1 | P53_signaling_pathway       | READ | -0.215770369 |
| UPP1 | Pantothenate and coa bios   | READ | 0.155453679  |
| UPP1 | Pentose and glucuronate i   | READ | 0.050462673  |
| UPP1 | Pentose phosphate pathwa    | READ | 0.213030134  |
| UPP1 | Pericyte                    | READ | 0.232826565  |
| UPP1 | Phenylalanine metabolism    | READ | 0.173123192  |
| UPP1 | Phenylalanine, tyrosine ar  | READ | 0.028469664  |
| UPP1 | Phosphonate and phosphir    | READ | -0.152172362 |
| UPP1 | Pi3k_akt_activation         | READ | -0.171753801 |
| UPP1 | Pi3k_akt_mtor_signaling     | READ | -0.057927833 |
| UPP1 | Porphyrin and chlorophyl    | READ | 0.18064784   |
| UPP1 | Primary bile acid biosynt   | READ | -0.096616459 |
| UPP1 | Propanoate metabolism       | READ | -0.285482252 |
| UPP1 | Purine metabolism           | READ | 0.071605734  |
| UPP1 | Pyrimidine metabolism       | READ | 0.102223009  |
| UPP1 | Pyruvate metabolism         | READ | -0.112304516 |
| UPP1 | Regulation_of_autophagy     | READ | 0.128369067  |

|      |                            |      |              |
|------|----------------------------|------|--------------|
| UPP1 | Retinol metabolism         | READ | 0.07319642   |
| UPP1 | Riboflavin metabolism      | READ | 0.289571445  |
| UPP1 | Schmahl_pdgf_signaling     | READ | -0.126083257 |
| UPP1 | Selenocompound metabol     | READ | -0.219101997 |
| UPP1 | Signaling_by_hippo         | READ | -0.22221134  |
| UPP1 | Sphingolipid metabolism    | READ | 0.085321397  |
| UPP1 | Starch and sucrose metabo  | READ | 0.018641497  |
| UPP1 | Steroid biosynthesis       | READ | -0.084921364 |
| UPP1 | Steroid hormone biosynth   | READ | 0.140164584  |
| UPP1 | Sulfur metabolism          | READ | -0.139587185 |
| UPP1 | Synthesis and degradation  | READ | -0.248452422 |
| UPP1 | T helper cell              | READ | 0.127379595  |
| UPP1 | T helper1 (th1) cell       | READ | 0.089974987  |
| UPP1 | T helper17 (th17) cell     | READ | 0.151489977  |
| UPP1 | T helper2 (th2) cell       | READ | 0.22384767   |
| UPP1 | T helper9 (th9) cell       | READ | 0.200312907  |
| UPP1 | Taurine and hypotaurine r  | READ | 0.06806603   |
| UPP1 | Terpenoid backbone biosy   | READ | -0.170402955 |
| UPP1 | Tgf_beta_signaling_pathw   | READ | -0.127502916 |
| UPP1 | Thiamine metabolism        | READ | 0.255465266  |
| UPP1 | Tnfa_signaling_via_nfkb    | READ | 0.117201549  |
| UPP1 | Tryptophan metabolism      | READ | 0.052686648  |
| UPP1 | Tumor endothelial cell     | READ | 0.010050547  |
| UPP1 | Tyrosine metabolism        | READ | 0.190512881  |
| UPP1 | Ubiquinone and other terf  | READ | 0.172970559  |
| UPP1 | Valine, leucine and isoleu | READ | 0.445716125  |
| UPP1 | Valine, leucine and isoleu | READ | -0.215038899 |
| UPP1 | Vascular endothelial cell  | READ | 0.291908377  |
| UPP1 | Vascular smooth muscle c   | READ | 0.213143932  |
| UPP1 | Vegf_signaling_pathway     | READ | 0.175386437  |
| UPP1 | Vitamin b6 metabolism      | READ | -0.008398219 |
| UPP1 | Willert_wnt_signaling      | READ | 0.061881677  |
| UPP1 | Wnt_beta_catenin_signali   | READ | -0.178006798 |
| UPP2 | Abnormal plasma cell       | READ | 0.349916154  |
| UPP2 | Activated b cell           | READ | 0.031305165  |
| UPP2 | Activated cd4+ t cell      | READ | 0.02295182   |
| UPP2 | Activated t cell           | READ | 0.049880315  |
| UPP2 | Alanine, aspartate and glu | READ | 0.210224625  |
| UPP2 | Alcala_apoptosis           | READ | -0.005254539 |
| UPP2 | Alpha-linolenic acid meta  | READ | 0.134353132  |
| UPP2 | Amino sugar and nucleoti   | READ | 0.093514001  |
| UPP2 | Ampk_pathway               | READ | -0.023250931 |
| UPP2 | Angiogenesis               | READ | 0.226583106  |

|      |                                         |      |              |
|------|-----------------------------------------|------|--------------|
| UPP2 | Arachidonic acid metabolism             | READ | 0.132626862  |
| UPP2 | Arginine and proline metabolism         | READ | 0.204754592  |
| UPP2 | Arginine biosynthesis                   | READ | 0.225515826  |
| UPP2 | Ascorbate and aldarate metabolism       | READ | 0.20819872   |
| UPP2 | Atypical memory b cell                  | READ | 0.208083649  |
| UPP2 | Axl+siglec6+ dendritic cell             | READ | 0.288742671  |
| UPP2 | B cell                                  | READ | 0.179054104  |
| UPP2 | B1 cell                                 | READ | -0.013372766 |
| UPP2 | Basal cell                              | READ | 0.062844636  |
| UPP2 | Beta-alanine metabolism                 | READ | 0.292796551  |
| UPP2 | Biosynthesis of unsaturated fatty acids | READ | 0.150976165  |
| UPP2 | Biotin metabolism                       | READ | 0.039879406  |
| UPP2 | Butanoate metabolism                    | READ | 0.055332196  |
| UPP2 | Caffeine metabolism                     | READ | 0.113851641  |
| UPP2 | Cancer stem cell                        | READ | 0.230839436  |
| UPP2 | Cancer stem-like cell                   | READ | -0.031960666 |
| UPP2 | Cd4+ cytotoxic t cell                   | READ | 0.215048174  |
| UPP2 | Cd4+ memory t cell                      | READ | 0.076778652  |
| UPP2 | Cd4+ regulatory t cell                  | READ | 0.020019336  |
| UPP2 | Cd4+ t helper cell                      | READ | 0.055145063  |
| UPP2 | Cd4+cd25+ regulatory t cell             | READ | 0.053123009  |
| UPP2 | Cd8+ cytotoxic t cell                   | READ | 0.130242983  |
| UPP2 | Cd8+ regulatory t cell                  | READ | 0.123771228  |
| UPP2 | Cell cycle                              | READ | -0.042652668 |
| UPP2 | Chandran_metastasis_topography          | READ | 0.064898863  |
| UPP2 | Citrate cycle (tca cycle)               | READ | 0.021566056  |
| UPP2 | Cysteine and methionine metabolism      | READ | 0.12989333   |
| UPP2 | Cytokine induced killer cell            | READ | 0.249106447  |
| UPP2 | D-arginine and d-ornithine              | READ | 0.171411664  |
| UPP2 | D-glutamine and d-glutamate             | READ | 0.134145836  |
| UPP2 | Dendritic cell                          | READ | 0.144285893  |
| UPP2 | Dna_repair                              | READ | -0.064981282 |
| UPP2 | Dna_replication                         | READ | -0.175127314 |
| UPP2 | Double-negative memory t cell           | READ | 0.025021495  |
| UPP2 | Drug metabolism - cytochrome p450       | READ | 0.222467027  |
| UPP2 | Drug metabolism - other                 | READ | 0.150999707  |
| UPP2 | E2f_targets                             | READ | -0.202407146 |
| UPP2 | Ecm_receptor_interaction                | READ | 0.246502908  |
| UPP2 | Effector cd4+ memory t cell             | READ | 0.045249722  |
| UPP2 | Effector cd8+ memory t cell             | READ | 0.150103877  |
| UPP2 | Effector memory t cell                  | READ | 0.064373143  |
| UPP2 | Effector regulatory t (treg) cell       | READ | 0.00241802   |
| UPP2 | Elvidge_hif1a_targets_upregulated       | READ | -0.005090792 |

|      |                              |      |              |
|------|------------------------------|------|--------------|
| UPP2 | Endothelial cell             | READ | 0.181070917  |
| UPP2 | Eosinophil                   | READ | 0.021832369  |
| UPP2 | Ether lipid metabolism       | READ | 0.109981652  |
| UPP2 | Exhausted cd4+ t cell        | READ | 0.138764022  |
| UPP2 | Exhausted cd8+ t cell        | READ | 0.133302191  |
| UPP2 | Exhausted t cell             | READ | 0.1382534    |
| UPP2 | Fat cell (adipocyte)         | READ | 0.204838634  |
| UPP2 | Fatty acid biosynthesis      | READ | 0.050240812  |
| UPP2 | Fatty acid degradation       | READ | 0.110905709  |
| UPP2 | Fatty acid elongation        | READ | 0.160329467  |
| UPP2 | Fibroblast                   | READ | 0.189143964  |
| UPP2 | Folate biosynthesis          | READ | 0.110287161  |
| UPP2 | Follicular b cell            | READ | 0.131239669  |
| UPP2 | Follicular dendritic cell    | READ | 0.217155708  |
| UPP2 | Follicular helper (tfh) t ce | READ | 0.156818245  |
| UPP2 | Follicular t cell            | READ | 0.068729482  |
| UPP2 | Foxp3+il-17+ t cell          | READ | 0.111186445  |
| UPP2 | Fructose and mannose me      | READ | -0.068592628 |
| UPP2 | G2m_checkpoint               | READ | -0.136865829 |
| UPP2 | Galactose metabolism         | READ | 0.019113514  |
| UPP2 | Galie_tumor_stemness_ge      | READ | 0.219286405  |
| UPP2 | Glutathione metabolism       | READ | 0.017010663  |
| UPP2 | Glycerolipid metabolism      | READ | 0.172409278  |
| UPP2 | Glycerophospholipid metæ     | READ | 0.166500979  |
| UPP2 | Glycine, serine and threor   | READ | 0.287381395  |
| UPP2 | Glycolysis / gluconeogene    | READ | -0.025334774 |
| UPP2 | Glycosaminoglycan biosy1     | READ | 0.085576253  |
| UPP2 | Glycosaminoglycan biosy1     | READ | 0.118489617  |
| UPP2 | Glycosaminoglycan biosy1     | READ | 0.057119773  |
| UPP2 | Glycosaminoglycan degra      | READ | 0.006958613  |
| UPP2 | Glycosphingolipid biosyn1    | READ | 0.124082173  |
| UPP2 | Glycosphingolipid biosyn1    | READ | 0.079201327  |
| UPP2 | Glycosphingolipid biosyn1    | READ | 0.12747258   |
| UPP2 | Glycosylphosphatidylinos     | READ | -0.08606503  |
| UPP2 | Glyoxylate and dicarboxy     | READ | 0.085126226  |
| UPP2 | Granulocyte                  | READ | 0.039392519  |
| UPP2 | Hedgehog_signaling           | READ | 0.229372893  |
| UPP2 | Histidine metabolism         | READ | 0.394406899  |
| UPP2 | Hypoxia                      | READ | 0.237921629  |
| UPP2 | Il-17alpha t cell            | READ | 0.078202065  |
| UPP2 | Il2_stat5_signaling          | READ | 0.204981509  |
| UPP2 | Il6_jak_stat3_signaling      | READ | 0.059885351  |
| UPP2 | Immune_checkpoints_turr      | READ | -0.015897231 |

|      |                             |      |              |
|------|-----------------------------|------|--------------|
| UPP2 | Immune_inhibition_cytok     | READ | -0.148302894 |
| UPP2 | Inositol phosphate metabo   | READ | 0.128869658  |
| UPP2 | Interleukin_6_signaling     | READ | -0.002525699 |
| UPP2 | Jaeger_metastasis_up        | READ | 0.219762021  |
| UPP2 | Jain_nfkb_signaling         | READ | 0.052104403  |
| UPP2 | Kras_signaling_up           | READ | 0.26672114   |
| UPP2 | Linoleic acid metabolism    | READ | 0.202888805  |
| UPP2 | Lipoic acid metabolism      | READ | -0.016370658 |
| UPP2 | Lysine degradation          | READ | 0.211226836  |
| UPP2 | Lysosome                    | READ | 0.199572867  |
| UPP2 | M1 macrophage               | READ | 0.095125251  |
| UPP2 | M2 macrophage               | READ | 0.097440554  |
| UPP2 | Mannose type o-glycan bi    | READ | -0.032634589 |
| UPP2 | Mapk_signaling_pathway      | READ | 0.203730919  |
| UPP2 | Mapk3_erk1_activation       | READ | -0.040852798 |
| UPP2 | Marginal zone b cell        | READ | 0.145278795  |
| UPP2 | Memory b cell               | READ | 0.198919183  |
| UPP2 | Mesenchymal cell            | READ | 0.120667914  |
| UPP2 | Mesenchymal stem cell       | READ | 0.136108003  |
| UPP2 | Metabolism of xenobiotic    | READ | 0.164412223  |
| UPP2 | Migrating cancer stem cel   | READ | -0.119131338 |
| UPP2 | Mitotic_spindle             | READ | 0.0540062    |
| UPP2 | Monocyte                    | READ | 0.112802728  |
| UPP2 | Mtor_signaling_pathway      | READ | 0.136876966  |
| UPP2 | Mtorc1_signaling            | READ | 0.022130824  |
| UPP2 | Mucin type o-glycan biosy   | READ | 0.205751726  |
| UPP2 | Myc_targets_v1              | READ | -0.062126504 |
| UPP2 | Myeloid cell                | READ | 0.113041927  |
| UPP2 | N-glycan biosynthesis       | READ | -0.01155779  |
| UPP2 | Naive b cell                | READ | -0.072346367 |
| UPP2 | Naive cd4+ t cell           | READ | 0.248052375  |
| UPP2 | Naive cd8+ t cell           | READ | 0.276534822  |
| UPP2 | Natural killer cell         | READ | 0.179818052  |
| UPP2 | Natural killer t (nkt) cell | READ | 0.094565195  |
| UPP2 | Natural regulatory t (treg) | READ | 0.063951059  |
| UPP2 | Neomycin, kanamycin and     | READ | 0.089007985  |
| UPP2 | Neutrophil                  | READ | 0.096355278  |
| UPP2 | Nicotinate and nicotinami   | READ | 0.273327994  |
| UPP2 | Nitrogen metabolism         | READ | 0.214989875  |
| UPP2 | Nod_like_receptor_signal    | READ | -0.039509269 |
| UPP2 | Notch_signaling             | READ | 0.319955749  |
| UPP2 | One carbon pool by folate   | READ | -0.051581088 |
| UPP2 | Other glycan degradation    | READ | 0.0302658    |



|      |                            |      |              |
|------|----------------------------|------|--------------|
| UPP2 | Other types of o-glycan b  | READ | 0.103206146  |
| UPP2 | Oxidative phosphorylation  | READ | 0.064056314  |
| UPP2 | P53_pathway                | READ | 0.263290865  |
| UPP2 | P53_signaling_pathway      | READ | 0.036070711  |
| UPP2 | Pantothenate and coa bios  | READ | 0.051723596  |
| UPP2 | Pentose and glucuronate i  | READ | 0.219066519  |
| UPP2 | Pentose phosphate pathwa   | READ | 0.00917451   |
| UPP2 | Pericyte                   | READ | 0.228777676  |
| UPP2 | Phenylalanine metabolism   | READ | 0.278298436  |
| UPP2 | Phenylalanine, tyrosine ar | READ | 0.079217549  |
| UPP2 | Phosphonate and phosphir   | READ | 0.166797231  |
| UPP2 | Pi3k_akt_activation        | READ | 0.21562978   |
| UPP2 | Pi3k_akt_mtor_signaling    | READ | 0.082184318  |
| UPP2 | Porphyrin and chlorophyl   | READ | 0.031829634  |
| UPP2 | Primary bile acid biosynt  | READ | 0.356320767  |
| UPP2 | Propanoate metabolism      | READ | 0.15373232   |
| UPP2 | Purine metabolism          | READ | -0.03225056  |
| UPP2 | Pyrimidine metabolism      | READ | -0.053533311 |
| UPP2 | Pyruvate metabolism        | READ | 0.121103328  |
| UPP2 | Regulation_of_autophagy    | READ | -0.307273274 |
| UPP2 | Retinol metabolism         | READ | 0.233372483  |
| UPP2 | Riboflavin metabolism      | READ | 0.244307149  |
| UPP2 | Schmahl_pdgf_signaling     | READ | 0.219661045  |
| UPP2 | Selenocompound metabol     | READ | 0.093557384  |
| UPP2 | Signaling_by_hippo         | READ | 0.20264824   |
| UPP2 | Sphingolipid metabolism    | READ | 0.053347774  |
| UPP2 | Starch and sucrose metabo  | READ | 0.207016502  |
| UPP2 | Steroid biosynthesis       | READ | 0.063538981  |
| UPP2 | Steroid hormone biosynth   | READ | 0.395034424  |
| UPP2 | Sulfur metabolism          | READ | -0.00656747  |
| UPP2 | Synthesis and degradation  | READ | 0.163007384  |
| UPP2 | T helper cell              | READ | 0.187637005  |
| UPP2 | T helper1 (th1) cell       | READ | 0.152349968  |
| UPP2 | T helper17 (th17) cell     | READ | 0.006755765  |
| UPP2 | T helper2 (th2) cell       | READ | 0.054818977  |
| UPP2 | T helper9 (th9) cell       | READ | -0.144356618 |
| UPP2 | Taurine and hypotaurine r  | READ | 0.132787836  |
| UPP2 | Terpenoid backbone biosy   | READ | 0.122930597  |
| UPP2 | Tgf_beta_signaling_pathw   | READ | 0.281169392  |
| UPP2 | Thiamine metabolism        | READ | 0.143635382  |
| UPP2 | Tnfa_signaling_via_nfk     | READ | 0.107901808  |
| UPP2 | Tryptophan metabolism      | READ | 0.15506279   |
| UPP2 | Tumor endothelial cell     | READ | 0.147174939  |

|      |                            |      |              |
|------|----------------------------|------|--------------|
| UPP2 | Tyrosine metabolism        | READ | 0.232770844  |
| UPP2 | Ubiquinone and other ter   | READ | 0.055387273  |
| UPP2 | Valine, leucine and isoleu | READ | -0.086726466 |
| UPP2 | Valine, leucine and isoleu | READ | 0.105963027  |
| UPP2 | Vascular endothelial cell  | READ | 0.059992667  |
| UPP2 | Vascular smooth muscle c   | READ | 0.217861825  |
| UPP2 | Vegf_signaling_pathway     | READ | 0.128360342  |
| UPP2 | Vitamin b6 metabolism      | READ | 0.146027183  |
| UPP2 | Willert_wnt_signaling      | READ | 0.245663596  |
| UPP2 | Wnt_beta_catenin_signali   | READ | 0.250959037  |
| CDA  | Abnormal plasma cell       | SARC | -0.210701312 |
| CDA  | Activated b cell           | SARC | 0.334728243  |
| CDA  | Activated cd4+ t cell      | SARC | 0.304314501  |
| CDA  | Activated t cell           | SARC | 0.314125082  |
| CDA  | Alanine, aspartate and glu | SARC | -0.102284525 |
| CDA  | Alcala_apoptosis           | SARC | 0.317045229  |
| CDA  | Alpha-linolenic acid meta  | SARC | 0.26034565   |
| CDA  | Amino sugar and nucleoti   | SARC | 0.327412386  |
| CDA  | Ampk_pathway               | SARC | -0.421687193 |
| CDA  | Angiogenesis               | SARC | 0.347073463  |
| CDA  | Arachidonic acid metabol   | SARC | 0.462458148  |
| CDA  | Arginine and proline met   | SARC | 0.127220342  |
| CDA  | Arginine biosynthesis      | SARC | 0.030077243  |
| CDA  | Ascorbate and aldarate m   | SARC | -0.155499181 |
| CDA  | Atypical memory b cell     | SARC | 0.313064566  |
| CDA  | Axl+siglec6+ dendritic ce  | SARC | 0.29635271   |
| CDA  | B cell                     | SARC | 0.34718586   |
| CDA  | B1 cell                    | SARC | 0.197461638  |
| CDA  | Basal cell                 | SARC | 0.438088713  |
| CDA  | Beta-alanine metabolism    | SARC | -0.044479962 |
| CDA  | Biosynthesis of unsaturate | SARC | -0.101959816 |
| CDA  | Biotin metabolism          | SARC | -0.204287363 |
| CDA  | Butanoate metabolism       | SARC | -0.219672736 |
| CDA  | Caffeine metabolism        | SARC | 0.144185403  |
| CDA  | Cancer stem cell           | SARC | 0.374996922  |
| CDA  | Cancer stem-like cell      | SARC | 0.311446834  |
| CDA  | Cd4+ cytotoxic t cell      | SARC | 0.283245288  |
| CDA  | Cd4+ memory t cell         | SARC | 0.209133711  |
| CDA  | Cd4+ regulatory t cell     | SARC | 0.366647146  |
| CDA  | Cd4+ t helper cell         | SARC | 0.316428337  |
| CDA  | Cd4+cd25+ regulatory t c   | SARC | 0.33709066   |
| CDA  | Cd8+ cytotoxic t cell      | SARC | 0.306169835  |
| CDA  | Cd8+ regulatory t cell     | SARC | 0.336759534  |

|     |                              |      |              |
|-----|------------------------------|------|--------------|
| CDA | Cell_cycle                   | SARC | -0.252236065 |
| CDA | Chandran_metastasis_top      | SARC | -0.25028212  |
| CDA | Citrate cycle (tca cycle)    | SARC | -0.080444188 |
| CDA | Cysteine and methionine r    | SARC | -0.079234654 |
| CDA | Cytokine induced killer c    | SARC | 0.054717724  |
| CDA | D-arginine and d-ornithin    | SARC | 0.187000427  |
| CDA | D-glutamine and d-glutan     | SARC | -0.155391862 |
| CDA | Dendritic cell               | SARC | 0.424059492  |
| CDA | Dna_repair                   | SARC | 0.229733781  |
| CDA | Dna_replication              | SARC | -0.143673565 |
| CDA | Double-negative memory       | SARC | 0.270999947  |
| CDA | Drug metabolism - cytoch     | SARC | 0.187146099  |
| CDA | Drug metabolism - other      | SARC | 0.285292664  |
| CDA | E2f_targets                  | SARC | -0.22276531  |
| CDA | Ecm_receptor_interaction     | SARC | 0.042634193  |
| CDA | Effector cd4+ memory t (     | SARC | 0.22043227   |
| CDA | Effector cd8+ memory t (     | SARC | 0.337595449  |
| CDA | Effector memory t cell       | SARC | 0.282266452  |
| CDA | Effector regulatory t (treg  | SARC | 0.350917707  |
| CDA | Elvidge_hif1a_targets_up     | SARC | 0.066904087  |
| CDA | Endothelial cell             | SARC | 0.317549709  |
| CDA | Eosinophil                   | SARC | 0.402161282  |
| CDA | Ether lipid metabolism       | SARC | 0.300438217  |
| CDA | Exhausted cd4+ t cell        | SARC | 0.193973359  |
| CDA | Exhausted cd8+ t cell        | SARC | 0.304665252  |
| CDA | Exhausted t cell             | SARC | 0.283919816  |
| CDA | Fat cell (adipocyte)         | SARC | 0.138167042  |
| CDA | Fatty acid biosynthesis      | SARC | 6.00E-05     |
| CDA | Fatty acid degradation       | SARC | -0.078069157 |
| CDA | Fatty acid elongation        | SARC | -0.015686879 |
| CDA | Fibroblast                   | SARC | 0.418737799  |
| CDA | Folate biosynthesis          | SARC | 0.194547627  |
| CDA | Follicular b cell            | SARC | 0.330413364  |
| CDA | Follicular dendritic cell    | SARC | 0.366956309  |
| CDA | Follicular helper (tfh) t ce | SARC | 0.291167874  |
| CDA | Follicular t cell            | SARC | 0.175869428  |
| CDA | Foxp3+il-17+ t cell          | SARC | 0.120573924  |
| CDA | Fructose and mannose me      | SARC | 0.181646073  |
| CDA | G2m_checkpoint               | SARC | -0.257693142 |
| CDA | Galactose metabolism         | SARC | 0.278820895  |
| CDA | Galie_tumor_stemness_ge      | SARC | 0.167410136  |
| CDA | Glutathione metabolism       | SARC | 0.385579807  |
| CDA | Glycerolipid metabolism      | SARC | -0.105422465 |

|     |                                          |      |              |
|-----|------------------------------------------|------|--------------|
| CDA | Glycerophospholipid metabolism           | SARC | 0.261216796  |
| CDA | Glycine, serine and threonine metabolism | SARC | -0.039609726 |
| CDA | Glycolysis / gluconeogenesis             | SARC | 0.070996806  |
| CDA | Glycosaminoglycan biosynthesis           | SARC | 0.344262599  |
| CDA | Glycosaminoglycan biosynthesis           | SARC | 0.159643071  |
| CDA | Glycosaminoglycan biosynthesis           | SARC | 0.150257621  |
| CDA | Glycosaminoglycan degradation            | SARC | 0.359022462  |
| CDA | Glycosphingolipid biosynthesis           | SARC | 0.249613788  |
| CDA | Glycosphingolipid biosynthesis           | SARC | 0.359009292  |
| CDA | Glycosphingolipid biosynthesis           | SARC | 0.148708105  |
| CDA | Glycosylphosphatidylinositol signaling   | SARC | -0.042631262 |
| CDA | Glyoxylate and dicarboxylate metabolism  | SARC | -0.087447842 |
| CDA | Granulocyte                              | SARC | 0.407392745  |
| CDA | Hedgehog signaling                       | SARC | -0.25424391  |
| CDA | Histidine metabolism                     | SARC | -0.024298839 |
| CDA | Hypoxia                                  | SARC | 0.176269642  |
| CDA | IL-17-producing T cell                   | SARC | 0.264377349  |
| CDA | IL2-stat5 signaling                      | SARC | 0.384747513  |
| CDA | IL6-jak-stat3 signaling                  | SARC | 0.375181162  |
| CDA | Immune checkpoints                       | SARC | 0.292061579  |
| CDA | Immune inhibition                        | SARC | 0.390982303  |
| CDA | Inositol phosphate metabolism            | SARC | -0.305452062 |
| CDA | Interleukin_6 signaling                  | SARC | -0.125025877 |
| CDA | Jaeger metastasis up                     | SARC | 0.000879829  |
| CDA | Jain_nfkB signaling                      | SARC | -0.052949295 |
| CDA | Kras signaling up                        | SARC | 0.36642164   |
| CDA | Linoleic acid metabolism                 | SARC | 0.225998656  |
| CDA | Lipoic acid metabolism                   | SARC | -0.040813995 |
| CDA | Lysine degradation                       | SARC | -0.46147445  |
| CDA | Lysosome                                 | SARC | 0.3849955    |
| CDA | M1 macrophage                            | SARC | 0.407224278  |
| CDA | M2 macrophage                            | SARC | 0.417586469  |
| CDA | Mannose type o-glycan biosynthesis       | SARC | 0.037776964  |
| CDA | Mapk signaling pathway                   | SARC | 0.080295493  |
| CDA | Mapk3_erk1 activation                    | SARC | -0.135429798 |
| CDA | Marginal zone B cell                     | SARC | 0.255447134  |
| CDA | Memory B cell                            | SARC | 0.300368495  |
| CDA | Mesenchymal cell                         | SARC | 0.36904247   |
| CDA | Mesenchymal stem cell                    | SARC | 0.331190056  |
| CDA | Metabolism of xenobiotics                | SARC | 0.224812307  |
| CDA | Migrating cancer stem cell               | SARC | 0.064499667  |
| CDA | Mitotic spindle                          | SARC | -0.343708205 |
| CDA | Monocyte                                 | SARC | 0.441923635  |

|     |                             |      |              |
|-----|-----------------------------|------|--------------|
| CDA | Mtor_signaling_pathway      | SARC | -0.090663598 |
| CDA | Mtorc1_signaling            | SARC | 0.135592104  |
| CDA | Mucin type o-glycan biosy   | SARC | 0.251820747  |
| CDA | Myc_targets_v1              | SARC | 0.115100629  |
| CDA | Myeloid cell                | SARC | 0.404372534  |
| CDA | N-glycan biosynthesis       | SARC | 0.224390179  |
| CDA | Naive b cell                | SARC | 0.269888516  |
| CDA | Naive cd4+ t cell           | SARC | 0.37070827   |
| CDA | Naive cd8+ t cell           | SARC | 0.216385504  |
| CDA | Natural killer cell         | SARC | 0.342135659  |
| CDA | Natural killer t (nkt) cell | SARC | 0.281470031  |
| CDA | Natural regulatory t (treg) | SARC | 0.335252281  |
| CDA | Neomycin, kanamycin and     | SARC | 0.226684591  |
| CDA | Neutrophil                  | SARC | 0.458568909  |
| CDA | Nicotinate and nicotinami   | SARC | 0.266322618  |
| CDA | Nitrogen metabolism         | SARC | -0.28588272  |
| CDA | Nod_like_receptor_signal    | SARC | 0.374940477  |
| CDA | Notch_signaling             | SARC | 0.214652109  |
| CDA | One carbon pool by folate   | SARC | -0.291976402 |
| CDA | Other glycan degradation    | SARC | 0.320436196  |
| CDA | Other types of o-glycan b   | SARC | 0.285814302  |
| CDA | Oxidative phosphorylatio    | SARC | 0.199742947  |
| CDA | P53_pathway                 | SARC | 0.365633546  |
| CDA | P53_signaling_pathway       | SARC | 0.01344191   |
| CDA | Pantothenate and coa bios   | SARC | 0.21168334   |
| CDA | Pentose and glucuronate i   | SARC | 0.172216927  |
| CDA | Pentose phosphate pathwa    | SARC | 0.166392439  |
| CDA | Pericyte                    | SARC | 0.40066854   |
| CDA | Phenylalanine metabolism    | SARC | 0.05091199   |
| CDA | Phenylalanine, tyrosine ar  | SARC | 0.139722768  |
| CDA | Phosphonate and phosphir    | SARC | 0.022938355  |
| CDA | Pi3k_akt_activation         | SARC | -0.063009372 |
| CDA | Pi3k_akt_mtor_signaling     | SARC | 0.178686035  |
| CDA | Porphyrin and chlorophyl    | SARC | 0.183808494  |
| CDA | Primary bile acid biosynt   | SARC | 0.273216528  |
| CDA | Propanoate metabolism       | SARC | -0.277452162 |
| CDA | Purine metabolism           | SARC | 0.20496078   |
| CDA | Pyrimidine metabolism       | SARC | 0.191304023  |
| CDA | Pyruvate metabolism         | SARC | -0.169429323 |
| CDA | Regulation_of_autophagy     | SARC | -0.034091998 |
| CDA | Retinol metabolism          | SARC | 0.267430792  |
| CDA | Riboflavin metabolism       | SARC | 0.277486331  |
| CDA | Schmahl_pdgf_signaling      | SARC | -0.173597854 |

|      |                            |      |              |
|------|----------------------------|------|--------------|
| CDA  | Selenocompound metabol     | SARC | 0.043854673  |
| CDA  | Signaling_by_hippo         | SARC | -0.30674287  |
| CDA  | Sphingolipid metabolism    | SARC | 0.198663363  |
| CDA  | Starch and sucrose metabo  | SARC | -0.088082761 |
| CDA  | Steroid biosynthesis       | SARC | 0.155566023  |
| CDA  | Steroid hormone biosynth   | SARC | 0.301404862  |
| CDA  | Sulfur metabolism          | SARC | 0.10541157   |
| CDA  | Synthesis and degradation  | SARC | -0.137162008 |
| CDA  | T helper cell              | SARC | 0.369432161  |
| CDA  | T helper1 (th1) cell       | SARC | 0.370622954  |
| CDA  | T helper17 (th17) cell     | SARC | 0.308040616  |
| CDA  | T helper2 (th2) cell       | SARC | 0.364905713  |
| CDA  | T helper9 (th9) cell       | SARC | 0.331886855  |
| CDA  | Taurine and hypotaurine r  | SARC | -0.051098907 |
| CDA  | Terpenoid backbone biosy   | SARC | -0.032454774 |
| CDA  | Tgf_beta_signaling_pathw   | SARC | -0.06062229  |
| CDA  | Thiamine metabolism        | SARC | 0.271103294  |
| CDA  | Tnfa_signaling_via_nfbk    | SARC | 0.317441402  |
| CDA  | Tryptophan metabolism      | SARC | 0.027611653  |
| CDA  | Tumor endothelial cell     | SARC | 0.278612406  |
| CDA  | Tyrosine metabolism        | SARC | 0.261010414  |
| CDA  | Ubiquinone and other ter   | SARC | -0.034915405 |
| CDA  | Valine, leucine and isoleu | SARC | 0.245351462  |
| CDA  | Valine, leucine and isoleu | SARC | -0.228081021 |
| CDA  | Vascular endothelial cell  | SARC | 0.355494683  |
| CDA  | Vascular smooth muscle c   | SARC | -0.118012824 |
| CDA  | Vegf_signaling_pathway     | SARC | 0.227607706  |
| CDA  | Vitamin b6 metabolism      | SARC | 0.240064458  |
| CDA  | Willert_wnt_signaling      | SARC | 0.251392484  |
| CDA  | Wnt_beta_catenin_signali   | SARC | 0.001346315  |
| UCK1 | Abnormal plasma cell       | SARC | 0.043406726  |
| UCK1 | Activated b cell           | SARC | -0.028941639 |
| UCK1 | Activated cd4+ t cell      | SARC | -0.12008767  |
| UCK1 | Activated t cell           | SARC | -0.057642816 |
| UCK1 | Alanine, aspartate and glu | SARC | 0.008869984  |
| UCK1 | Alcala_apoptosis           | SARC | 0.158686406  |
| UCK1 | Alpha-linolenic acid meta  | SARC | 0.274509203  |
| UCK1 | Amino sugar and nucleoti   | SARC | 0.031288307  |
| UCK1 | Ampk_pathway               | SARC | 0.156978013  |
| UCK1 | Angiogenesis               | SARC | -0.160413339 |
| UCK1 | Arachidonic acid metabo    | SARC | 0.169540614  |
| UCK1 | Arginine and proline met   | SARC | 0.181984593  |
| UCK1 | Arginine biosynthesis      | SARC | -0.078069328 |

|      |                             |      |              |
|------|-----------------------------|------|--------------|
| UCK1 | Ascorbate and aldarate me   | SARC | 0.26470477   |
| UCK1 | Atypical memory b cell      | SARC | -0.105454274 |
| UCK1 | Axl+siglec6+ dendritic ce   | SARC | -0.052538981 |
| UCK1 | B cell                      | SARC | -0.121703911 |
| UCK1 | B1 cell                     | SARC | -0.022276768 |
| UCK1 | Basal cell                  | SARC | 0.059144512  |
| UCK1 | Beta-alanine metabolism     | SARC | 0.196817001  |
| UCK1 | Biosynthesis of unsaturate  | SARC | 0.241531277  |
| UCK1 | Biotin metabolism           | SARC | 0.073633328  |
| UCK1 | Butanoate metabolism        | SARC | 0.392459036  |
| UCK1 | Caffeine metabolism         | SARC | 0.021245534  |
| UCK1 | Cancer stem cell            | SARC | -0.326136919 |
| UCK1 | Cancer stem-like cell       | SARC | -0.274541508 |
| UCK1 | Cd4+ cytotoxic t cell       | SARC | 0.069818177  |
| UCK1 | Cd4+ memory t cell          | SARC | -0.040198386 |
| UCK1 | Cd4+ regulatory t cell      | SARC | -0.11880416  |
| UCK1 | Cd4+ t helper cell          | SARC | -0.045089838 |
| UCK1 | Cd4+cd25+ regulatory t c    | SARC | -0.07132292  |
| UCK1 | Cd8+ cytotoxic t cell       | SARC | 0.002823543  |
| UCK1 | Cd8+ regulatory t cell      | SARC | -0.080036451 |
| UCK1 | Cell_cycle                  | SARC | -0.054187274 |
| UCK1 | Chandran_metastasis_top5    | SARC | -0.268607043 |
| UCK1 | Citrate cycle (tca cycle)   | SARC | 0.246855546  |
| UCK1 | Cysteine and methionine r   | SARC | 0.064171622  |
| UCK1 | Cytokine induced killer c   | SARC | 0.046917486  |
| UCK1 | D-arginine and d-ornithin   | SARC | 0.088439185  |
| UCK1 | D-glutamine and d-glutan    | SARC | -0.355974995 |
| UCK1 | Dendritic cell              | SARC | -0.117720306 |
| UCK1 | Dna_repair                  | SARC | 0.264412873  |
| UCK1 | Dna_replication             | SARC | 0.25995014   |
| UCK1 | Double-negative memory      | SARC | 0.011597968  |
| UCK1 | Drug metabolism - cytoch    | SARC | 0.325947061  |
| UCK1 | Drug metabolism - other     | SARC | 0.339708829  |
| UCK1 | E2f_targets                 | SARC | 0.052332499  |
| UCK1 | Ecm_receptor_interaction    | SARC | -0.148825302 |
| UCK1 | Effector cd4+ memory t (    | SARC | -0.119064737 |
| UCK1 | Effector cd8+ memory t (    | SARC | -0.067493363 |
| UCK1 | Effector memory t cell      | SARC | -0.08177808  |
| UCK1 | Effector regulatory t (treg | SARC | -0.207710096 |
| UCK1 | Elvidge_hif1a_targets_up    | SARC | -0.228144161 |
| UCK1 | Endothelial cell            | SARC | -0.29880592  |
| UCK1 | Eosinophil                  | SARC | -0.073197643 |
| UCK1 | Ether lipid metabolism      | SARC | -0.062152538 |

|      |                              |      |              |
|------|------------------------------|------|--------------|
| UCK1 | Exhausted cd4+ t cell        | SARC | -0.056722991 |
| UCK1 | Exhausted cd8+ t cell        | SARC | -0.097433572 |
| UCK1 | Exhausted t cell             | SARC | 0.003049112  |
| UCK1 | Fat cell (adipocyte)         | SARC | 0.176347065  |
| UCK1 | Fatty acid biosynthesis      | SARC | 0.030937239  |
| UCK1 | Fatty acid degradation       | SARC | 0.317900428  |
| UCK1 | Fatty acid elongation        | SARC | 0.248981572  |
| UCK1 | Fibroblast                   | SARC | -0.22057966  |
| UCK1 | Folate biosynthesis          | SARC | 0.405115504  |
| UCK1 | Follicular b cell            | SARC | -0.113086871 |
| UCK1 | Follicular dendritic cell    | SARC | -0.168504685 |
| UCK1 | Follicular helper (tfh) t ce | SARC | -0.078222616 |
| UCK1 | Follicular t cell            | SARC | 0.074047609  |
| UCK1 | Foxp3+il-17+ t cell          | SARC | -0.071554489 |
| UCK1 | Fructose and mannose me      | SARC | 0.197655517  |
| UCK1 | G2m_checkpoint               | SARC | -0.061523457 |
| UCK1 | Galactose metabolism         | SARC | 0.109763186  |
| UCK1 | Galie_tumor_stemness_ge      | SARC | -0.250866336 |
| UCK1 | Glutathione metabolism       | SARC | 0.165784983  |
| UCK1 | Glycerolipid metabolism      | SARC | 0.236217401  |
| UCK1 | Glycerophospholipid metæ     | SARC | 0.218788122  |
| UCK1 | Glycine, serine and threor   | SARC | 0.351625168  |
| UCK1 | Glycolysis / gluconeogene    | SARC | 0.281067477  |
| UCK1 | Glycosaminoglycan biosy1     | SARC | -0.135212357 |
| UCK1 | Glycosaminoglycan biosy1     | SARC | -0.293516808 |
| UCK1 | Glycosaminoglycan biosy1     | SARC | -0.084206244 |
| UCK1 | Glycosaminoglycan degra      | SARC | -0.00979515  |
| UCK1 | Glycosphingolipid biosyn1    | SARC | 0.046188457  |
| UCK1 | Glycosphingolipid biosyn1    | SARC | -0.003226612 |
| UCK1 | Glycosphingolipid biosyn1    | SARC | -0.005207551 |
| UCK1 | Glycosylphosphatidylinos:    | SARC | 0.135159162  |
| UCK1 | Glyoxylate and dicarboxy     | SARC | 0.350020451  |
| UCK1 | Granulocyte                  | SARC | -0.124436805 |
| UCK1 | Hedgehog_signaling           | SARC | -0.217725715 |
| UCK1 | Histidine metabolism         | SARC | 0.25760612   |
| UCK1 | Hypoxia                      | SARC | 0.022137944  |
| UCK1 | Il-17ralpha t cell           | SARC | -0.026450336 |
| UCK1 | Il2_stat5_signaling          | SARC | -0.136484625 |
| UCK1 | Il6_jak_stat3_signaling      | SARC | -0.146201857 |
| UCK1 | Immune_checkpoints_tunr      | SARC | 0.05338649   |
| UCK1 | Immune_inhibition_cytok      | SARC | -0.002657536 |
| UCK1 | Inositol phosphate metabo    | SARC | -0.18546984  |
| UCK1 | Interleukin_6_signaling      | SARC | -0.344982409 |



|      |                             |      |              |
|------|-----------------------------|------|--------------|
| UCK1 | Jaeger_metastasis_up        | SARC | 0.018618942  |
| UCK1 | Jain_nfkb_signaling         | SARC | 0.050197777  |
| UCK1 | Kras_signaling_up           | SARC | -0.206435189 |
| UCK1 | Linoleic acid metabolism    | SARC | 0.231882988  |
| UCK1 | Lipoic acid metabolism      | SARC | 0.128293406  |
| UCK1 | Lysine degradation          | SARC | 0.109165047  |
| UCK1 | Lysosome                    | SARC | -0.040387871 |
| UCK1 | M1 macrophage               | SARC | -0.101309294 |
| UCK1 | M2 macrophage               | SARC | -0.109263192 |
| UCK1 | Mannose type o-glycan bi    | SARC | 0.051755246  |
| UCK1 | Mapk_signaling_pathway      | SARC | -0.220571979 |
| UCK1 | Mapk3_erk1_activation       | SARC | -0.364294141 |
| UCK1 | Marginal zone b cell        | SARC | -0.142023927 |
| UCK1 | Memory b cell               | SARC | -0.071762582 |
| UCK1 | Mesenchymal cell            | SARC | -0.246298442 |
| UCK1 | Mesenchymal stem cell       | SARC | -0.190833654 |
| UCK1 | Metabolism of xenobiotic    | SARC | 0.394117688  |
| UCK1 | Migrating cancer stem cel   | SARC | 0.044042992  |
| UCK1 | Mitotic_spindle             | SARC | -0.265152608 |
| UCK1 | Monocyte                    | SARC | -0.052645354 |
| UCK1 | Mtor_signaling_pathway      | SARC | -0.105423061 |
| UCK1 | Mtorc1_signaling            | SARC | -0.026164808 |
| UCK1 | Mucin type o-glycan biosy   | SARC | -0.375870311 |
| UCK1 | Myc_targets_v1              | SARC | 0.103459262  |
| UCK1 | Myeloid cell                | SARC | -0.144784555 |
| UCK1 | N-glycan biosynthesis       | SARC | -0.192620361 |
| UCK1 | Naive b cell                | SARC | -0.059584206 |
| UCK1 | Naive cd4+ t cell           | SARC | -0.236725746 |
| UCK1 | Naive cd8+ t cell           | SARC | -0.201422644 |
| UCK1 | Natural killer cell         | SARC | -0.070104586 |
| UCK1 | Natural killer t (nkt) cell | SARC | -0.002879839 |
| UCK1 | Natural regulatory t (treg) | SARC | -0.10905441  |
| UCK1 | Neomycin, kanamycin and     | SARC | 0.029641656  |
| UCK1 | Neutrophil                  | SARC | -0.098378798 |
| UCK1 | Nicotinate and nicotinami   | SARC | 0.009343347  |
| UCK1 | Nitrogen metabolism         | SARC | 0.086161228  |
| UCK1 | Nod_like_receptor_signal    | SARC | -0.165980999 |
| UCK1 | Notch_signaling             | SARC | -0.242325177 |
| UCK1 | One carbon pool by folate   | SARC | 0.300569021  |
| UCK1 | Other glycan degradation    | SARC | -0.035215454 |
| UCK1 | Other types of o-glycan b   | SARC | -0.080208033 |
| UCK1 | Oxidative phosphorylatio    | SARC | 0.458520092  |
| UCK1 | P53_pathway                 | SARC | -0.001308252 |

|      |                            |      |              |
|------|----------------------------|------|--------------|
| UCK1 | P53_signaling_pathway      | SARC | -0.27983722  |
| UCK1 | Pantothenate and coa bios  | SARC | -0.068638779 |
| UCK1 | Pentose and glucuronate i  | SARC | 0.127677798  |
| UCK1 | Pentose phosphate pathwa   | SARC | 0.169223135  |
| UCK1 | Pericyte                   | SARC | -0.240388971 |
| UCK1 | Phenylalanine metabolism   | SARC | 0.384958215  |
| UCK1 | Phenylalanine, tyrosine ar | SARC | 0.152996583  |
| UCK1 | Phosphonate and phosphir   | SARC | 0.104390908  |
| UCK1 | Pi3k_akt_activation        | SARC | -0.205463133 |
| UCK1 | Pi3k_akt_mtor_signaling    | SARC | -0.075542279 |
| UCK1 | Porphyrin and chlorophyl   | SARC | 0.241557186  |
| UCK1 | Primary bile acid biosynt  | SARC | 0.098929456  |
| UCK1 | Propanoate metabolism      | SARC | 0.137956275  |
| UCK1 | Purine metabolism          | SARC | 0.055504612  |
| UCK1 | Pyrimidine metabolism      | SARC | 0.108834435  |
| UCK1 | Pyruvate metabolism        | SARC | 0.400488736  |
| UCK1 | Regulation_of_autophagy    | SARC | 0.195340211  |
| UCK1 | Retinol metabolism         | SARC | 0.229858536  |
| UCK1 | Riboflavin metabolism      | SARC | 0.078429478  |
| UCK1 | Schmahl_pdgf_signaling     | SARC | -0.171014667 |
| UCK1 | Selenocompound metabol     | SARC | -0.315481627 |
| UCK1 | Signaling_by_hippo         | SARC | -0.320220914 |
| UCK1 | Sphingolipid metabolism    | SARC | -0.274764372 |
| UCK1 | Starch and sucrose metabo  | SARC | 0.245444568  |
| UCK1 | Steroid biosynthesis       | SARC | 0.094162093  |
| UCK1 | Steroid hormone biosynth   | SARC | 0.140242143  |
| UCK1 | Sulfur metabolism          | SARC | -0.113619517 |
| UCK1 | Synthesis and degradation  | SARC | 0.354118413  |
| UCK1 | T helper cell              | SARC | -0.102481863 |
| UCK1 | T helper1 (th1) cell       | SARC | -0.067747402 |
| UCK1 | T helper17 (th17) cell     | SARC | -0.086663094 |
| UCK1 | T helper2 (th2) cell       | SARC | -0.04831613  |
| UCK1 | T helper9 (th9) cell       | SARC | -0.053431276 |
| UCK1 | Taurine and hypotaurine r  | SARC | 0.081442632  |
| UCK1 | Terpenoid backbone biosy   | SARC | 0.106192967  |
| UCK1 | Tgf_beta_signaling_pathw   | SARC | -0.451645896 |
| UCK1 | Thiamine metabolism        | SARC | 0.28495376   |
| UCK1 | Tnfa_signaling_via_nfk     | SARC | -0.123203378 |
| UCK1 | Tryptophan metabolism      | SARC | 0.299644963  |
| UCK1 | Tumor endothelial cell     | SARC | -0.064056041 |
| UCK1 | Tyrosine metabolism        | SARC | 0.330685137  |
| UCK1 | Ubiquinone and other ter   | SARC | 0.291941973  |
| UCK1 | Valine, leucine and isoleu | SARC | 0.172214763  |

|      |                            |      |              |
|------|----------------------------|------|--------------|
| UCK1 | Valine, leucine and isoleu | SARC | 0.279266096  |
| UCK1 | Vascular endothelial cell  | SARC | -0.141982403 |
| UCK1 | Vascular smooth muscle c   | SARC | 0.208350541  |
| UCK1 | Vegf_signaling_pathway     | SARC | -0.157857558 |
| UCK1 | Vitamin b6 metabolism      | SARC | 0.153539857  |
| UCK1 | Willert_wnt_signaling      | SARC | -0.12520227  |
| UCK1 | Wnt_beta_catenin_signali   | SARC | -0.310791873 |
| UCK2 | Abnormal plasma cell       | SARC | -0.033630918 |
| UCK2 | Activated b cell           | SARC | 0.179279787  |
| UCK2 | Activated cd4+ t cell      | SARC | 0.172960949  |
| UCK2 | Activated t cell           | SARC | 0.146475964  |
| UCK2 | Alanine, aspartate and glu | SARC | -0.011437709 |
| UCK2 | Alcala_apoptosis           | SARC | 0.368722701  |
| UCK2 | Alpha-linolenic acid meta  | SARC | -0.186361552 |
| UCK2 | Amino sugar and nucleoti   | SARC | 0.452371533  |
| UCK2 | Ampk_pathway               | SARC | -0.158299631 |
| UCK2 | Angiogenesis               | SARC | 0.205485013  |
| UCK2 | Arachidonic acid metabol   | SARC | 0.004032904  |
| UCK2 | Arginine and proline metæ  | SARC | 0.114124609  |
| UCK2 | Arginine biosynthesis      | SARC | -0.015591267 |
| UCK2 | Ascorbate and aldarate me  | SARC | 0.052568066  |
| UCK2 | Atypical memory b cell     | SARC | 0.253494666  |
| UCK2 | Axl+siglec6+ dendritic ce  | SARC | -0.052835087 |
| UCK2 | B cell                     | SARC | 0.125324906  |
| UCK2 | B1 cell                    | SARC | 0.049852681  |
| UCK2 | Basal cell                 | SARC | 0.312141309  |
| UCK2 | Beta-alanine metabolism    | SARC | -0.247711143 |
| UCK2 | Biosynthesis of unsaturate | SARC | 0.041408288  |
| UCK2 | Biotin metabolism          | SARC | 0.070328889  |
| UCK2 | Butanoate metabolism       | SARC | -0.267977316 |
| UCK2 | Caffeine metabolism        | SARC | 0.024527703  |
| UCK2 | Cancer stem cell           | SARC | 0.175529114  |
| UCK2 | Cancer stem-like cell      | SARC | 0.27934984   |
| UCK2 | Cd4+ cytotoxic t cell      | SARC | 0.078264085  |
| UCK2 | Cd4+ memory t cell         | SARC | 0.061786469  |
| UCK2 | Cd4+ regulatory t cell     | SARC | 0.195709221  |
| UCK2 | Cd4+ t helper cell         | SARC | 0.13271431   |
| UCK2 | Cd4+cd25+ regulatory t c   | SARC | 0.144518768  |
| UCK2 | Cd8+ cytotoxic t cell      | SARC | 0.126573258  |
| UCK2 | Cd8+ regulatory t cell     | SARC | 0.142203719  |
| UCK2 | Cell_cycle                 | SARC | 0.244560827  |
| UCK2 | Chandran_metastasis_topç   | SARC | 0.171075986  |
| UCK2 | Citrate cycle (tca cycle)  | SARC | 0.125474413  |

|      |                              |      |              |
|------|------------------------------|------|--------------|
| UCK2 | Cysteine and methionine r    | SARC | 0.377561858  |
| UCK2 | Cytokine induced killer c    | SARC | -0.042091968 |
| UCK2 | D-arginine and d-ornithin    | SARC | 0.006100522  |
| UCK2 | D-glutamine and d-glutan     | SARC | -0.115807394 |
| UCK2 | Dendritic cell               | SARC | 0.168968076  |
| UCK2 | Dna_repair                   | SARC | 0.436139459  |
| UCK2 | Dna_replication              | SARC | 0.324815861  |
| UCK2 | Double-negative memory       | SARC | 0.053972165  |
| UCK2 | Drug metabolism - cytoch     | SARC | -0.167756248 |
| UCK2 | Drug metabolism - other c    | SARC | 0.409010913  |
| UCK2 | E2f_targets                  | SARC | 0.297641634  |
| UCK2 | Ecm_receptor_interaction     | SARC | 0.012183083  |
| UCK2 | Effector cd4+ memory t (     | SARC | 0.068714883  |
| UCK2 | Effector cd8+ memory t (     | SARC | 0.149843347  |
| UCK2 | Effector memory t cell       | SARC | 0.104108719  |
| UCK2 | Effector regulatory t (treg  | SARC | 0.208740684  |
| UCK2 | Elvidge_hif1a_targets_up     | SARC | 0.308314957  |
| UCK2 | Endothelial cell             | SARC | 0.072386903  |
| UCK2 | Eosinophil                   | SARC | 0.185361248  |
| UCK2 | Ether lipid metabolism       | SARC | -0.159285842 |
| UCK2 | Exhausted cd4+ t cell        | SARC | 0.10443377   |
| UCK2 | Exhausted cd8+ t cell        | SARC | 0.137035965  |
| UCK2 | Exhausted t cell             | SARC | 0.120393458  |
| UCK2 | Fat cell (adipocyte)         | SARC | -0.229791249 |
| UCK2 | Fatty acid biosynthesis      | SARC | -0.032008543 |
| UCK2 | Fatty acid degradation       | SARC | -0.313560023 |
| UCK2 | Fatty acid elongation        | SARC | 0.193083226  |
| UCK2 | Fibroblast                   | SARC | 0.172981098  |
| UCK2 | Folate biosynthesis          | SARC | 0.178402261  |
| UCK2 | Follicular b cell            | SARC | 0.060074764  |
| UCK2 | Follicular dendritic cell    | SARC | 0.086632412  |
| UCK2 | Follicular helper (tfh) t ce | SARC | 0.179297757  |
| UCK2 | Follicular t cell            | SARC | 0.104025669  |
| UCK2 | Foxp3+il-17+ t cell          | SARC | 0.158761908  |
| UCK2 | Fructose and mannose me      | SARC | 0.388796067  |
| UCK2 | G2m_checkpoint               | SARC | 0.257316407  |
| UCK2 | Galactose metabolism         | SARC | 0.327461053  |
| UCK2 | Galie_tumor_stemness_ge      | SARC | 0.113095401  |
| UCK2 | Glutathione metabolism       | SARC | 0.390666762  |
| UCK2 | Glycerolipid metabolism      | SARC | 0.038912861  |
| UCK2 | Glycerophospholipid met      | SARC | -0.082532681 |
| UCK2 | Glycine, serine and threor   | SARC | 0.049802244  |
| UCK2 | Glycolysis / gluconeogene    | SARC | 0.218036822  |

|      |                           |      |              |
|------|---------------------------|------|--------------|
| UCK2 | Glycosaminoglycan biosyn  | SARC | 0.244710381  |
| UCK2 | Glycosaminoglycan biosyn  | SARC | 0.164753269  |
| UCK2 | Glycosaminoglycan biosyn  | SARC | 0.335727548  |
| UCK2 | Glycosaminoglycan degra   | SARC | 0.160125541  |
| UCK2 | Glycosphingolipid biosyn  | SARC | 0.158531852  |
| UCK2 | Glycosphingolipid biosyn  | SARC | 0.064906549  |
| UCK2 | Glycosphingolipid biosyn  | SARC | 0.024323541  |
| UCK2 | Glycosylphosphatidylinos  | SARC | 0.179539887  |
| UCK2 | Glyoxylate and dicarboxy  | SARC | 0.076283473  |
| UCK2 | Granulocyte               | SARC | 0.268457933  |
| UCK2 | Hedgehog_signaling        | SARC | -0.121030595 |
| UCK2 | Histidine metabolism      | SARC | -0.359338567 |
| UCK2 | Hypoxia                   | SARC | 0.294561057  |
| UCK2 | Il-17alpha t cell         | SARC | 0.110451052  |
| UCK2 | Il2_stat5_signaling       | SARC | 0.219784534  |
| UCK2 | Il6_jak_stat3_signaling   | SARC | 0.175974431  |
| UCK2 | Immune_checkpoints_tun    | SARC | 0.21729763   |
| UCK2 | Immune_inhibition_cytok   | SARC | 0.202967993  |
| UCK2 | Inositol phosphate metabo | SARC | -0.393749596 |
| UCK2 | Interleukin_6_signaling   | SARC | -0.15624322  |
| UCK2 | Jaeger_metastasis_up      | SARC | 0.376520863  |
| UCK2 | Jain_nfkb_signaling       | SARC | 0.46071811   |
| UCK2 | Kras_signaling_up         | SARC | 0.094545976  |
| UCK2 | Linoleic acid metabolism  | SARC | -0.184720533 |
| UCK2 | Lipoic acid metabolism    | SARC | -0.173402149 |
| UCK2 | Lysine degradation        | SARC | -0.267908561 |
| UCK2 | Lysosome                  | SARC | 0.184039471  |
| UCK2 | M1 macrophage             | SARC | 0.190849574  |
| UCK2 | M2 macrophage             | SARC | 0.160452359  |
| UCK2 | Mannose type o-glycan bi  | SARC | 0.0766184    |
| UCK2 | Mapk_signaling_pathway    | SARC | -0.029184412 |
| UCK2 | Mapk3_erk1_activation     | SARC | -0.123379429 |
| UCK2 | Marginal zone b cell      | SARC | 0.049563499  |
| UCK2 | Memory b cell             | SARC | 0.080807448  |
| UCK2 | Mesenchymal cell          | SARC | 0.257013002  |
| UCK2 | Mesenchymal stem cell     | SARC | 0.145143695  |
| UCK2 | Metabolism of xenobiotic  | SARC | -0.076336551 |
| UCK2 | Migrating cancer stem cel | SARC | 0.257457594  |
| UCK2 | Mitotic_spindle           | SARC | -0.027679552 |
| UCK2 | Monocyte                  | SARC | 0.214876674  |
| UCK2 | Mtor_signaling_pathway    | SARC | -0.180280424 |
| UCK2 | Mtorc1_signaling          | SARC | 0.54656769   |
| UCK2 | Mucin type o-glycan bios  | SARC | 0.143072329  |

|      |                             |      |              |
|------|-----------------------------|------|--------------|
| UCK2 | Myc_targets_v1              | SARC | 0.579333457  |
| UCK2 | Myeloid cell                | SARC | 0.171568485  |
| UCK2 | N-glycan biosynthesis       | SARC | 0.416898638  |
| UCK2 | Naive b cell                | SARC | 0.076880053  |
| UCK2 | Naive cd4+ t cell           | SARC | 0.066902387  |
| UCK2 | Naive cd8+ t cell           | SARC | -0.119337523 |
| UCK2 | Natural killer cell         | SARC | 0.175171766  |
| UCK2 | Natural killer t (nkt) cell | SARC | 0.341853597  |
| UCK2 | Natural regulatory t (treg) | SARC | 0.147583208  |
| UCK2 | Neomycin, kanamycin and     | SARC | 0.315472435  |
| UCK2 | Neutrophil                  | SARC | 0.289120797  |
| UCK2 | Nicotinate and nicotinami   | SARC | 0.018945526  |
| UCK2 | Nitrogen metabolism         | SARC | -0.032735232 |
| UCK2 | Nod_like_receptor_signal    | SARC | 0.184629498  |
| UCK2 | Notch_signaling             | SARC | 0.123686243  |
| UCK2 | One carbon pool by folate   | SARC | 0.00887871   |
| UCK2 | Other glycan degradation    | SARC | 0.121157969  |
| UCK2 | Other types of o-glycan b   | SARC | 0.267232785  |
| UCK2 | Oxidative phosphorylatio    | SARC | 0.189609064  |
| UCK2 | P53_pathway                 | SARC | 0.125998095  |
| UCK2 | P53_signaling_pathway       | SARC | 0.030759223  |
| UCK2 | Pantothenate and coa bios   | SARC | 0.142251277  |
| UCK2 | Pentose and glucuronate in  | SARC | 0.298167642  |
| UCK2 | Pentose phosphate pathwa    | SARC | 0.322301191  |
| UCK2 | Pericyte                    | SARC | 0.188177277  |
| UCK2 | Phenylalanine metabolism    | SARC | -0.232198196 |
| UCK2 | Phenylalanine, tyrosine ar  | SARC | 0.139566044  |
| UCK2 | Phosphonate and phosphir    | SARC | 0.051999104  |
| UCK2 | Pi3k_akt_activation         | SARC | -0.119912345 |
| UCK2 | Pi3k_akt_mtor_signaling     | SARC | 0.242230381  |
| UCK2 | Porphyrin and chlorophyl    | SARC | 0.333484697  |
| UCK2 | Primary bile acid biosynt   | SARC | -0.047625672 |
| UCK2 | Propanoate metabolism       | SARC | -0.280385015 |
| UCK2 | Purine metabolism           | SARC | 0.556835533  |
| UCK2 | Pyrimidine metabolism       | SARC | 0.571103211  |
| UCK2 | Pyruvate metabolism         | SARC | -0.061881479 |
| UCK2 | Regulation_of_autophagy     | SARC | -0.054477805 |
| UCK2 | Retinol metabolism          | SARC | -0.101551433 |
| UCK2 | Riboflavin metabolism       | SARC | 0.325146182  |
| UCK2 | Schmahl_pdgf_signaling      | SARC | -0.138428974 |
| UCK2 | Selenocompound metabol      | SARC | 0.152761107  |
| UCK2 | Signaling_by_hippo          | SARC | -0.09221921  |
| UCK2 | Sphingolipid metabolism     | SARC | 0.027998979  |

|       |                            |      |              |
|-------|----------------------------|------|--------------|
| UCK2  | Starch and sucrose metabo  | SARC | 0.004339082  |
| UCK2  | Steroid biosynthesis       | SARC | 0.322703682  |
| UCK2  | Steroid hormone biosynth   | SARC | 0.000393875  |
| UCK2  | Sulfur metabolism          | SARC | 0.072651352  |
| UCK2  | Synthesis and degradation  | SARC | -0.013392635 |
| UCK2  | T helper cell              | SARC | 0.136901815  |
| UCK2  | T helper1 (th1) cell       | SARC | 0.161751882  |
| UCK2  | T helper17 (th17) cell     | SARC | 0.178718385  |
| UCK2  | T helper2 (th2) cell       | SARC | 0.073013061  |
| UCK2  | T helper9 (th9) cell       | SARC | 0.133003808  |
| UCK2  | Taurine and hypotaurine r  | SARC | -0.19240933  |
| UCK2  | Terpenoid backbone biosy   | SARC | 0.329104902  |
| UCK2  | Tgf_beta_signaling_pathw   | SARC | -0.077579748 |
| UCK2  | Thiamine metabolism        | SARC | 0.337601629  |
| UCK2  | Tnfa_signaling_via_nfkb    | SARC | 0.233037123  |
| UCK2  | Tryptophan metabolism      | SARC | -0.249661164 |
| UCK2  | Tumor endothelial cell     | SARC | 0.410087952  |
| UCK2  | Tyrosine metabolism        | SARC | -0.259634927 |
| UCK2  | Ubiquinone and other terp  | SARC | 0.047532173  |
| UCK2  | Valine, leucine and isoleu | SARC | 0.365740449  |
| UCK2  | Valine, leucine and isoleu | SARC | -0.224304581 |
| UCK2  | Vascular endothelial cell  | SARC | 0.011293221  |
| UCK2  | Vascular smooth muscle c   | SARC | -0.218606314 |
| UCK2  | Vegf_signaling_pathway     | SARC | 0.143447805  |
| UCK2  | Vitamin b6 metabolism      | SARC | 0.173213186  |
| UCK2  | Willert_wnt_signaling      | SARC | 0.355338923  |
| UCK2  | Wnt_beta_catenin_signali   | SARC | 0.086855101  |
| UCKL1 | Abnormal plasma cell       | SARC | -0.07477958  |
| UCKL1 | Activated b cell           | SARC | 0.055854551  |
| UCKL1 | Activated cd4+ t cell      | SARC | -0.029442355 |
| UCKL1 | Activated t cell           | SARC | 0.031167968  |
| UCKL1 | Alanine, aspartate and glu | SARC | -0.000365791 |
| UCKL1 | Alcala_apoptosis           | SARC | 0.249473632  |
| UCKL1 | Alpha-linolenic acid meta  | SARC | 0.043697839  |
| UCKL1 | Amino sugar and nucleoti   | SARC | -0.011369323 |
| UCKL1 | Ampk_pathway               | SARC | -0.053591214 |
| UCKL1 | Angiogenesis               | SARC | -0.106333411 |
| UCKL1 | Arachidonic acid metabol   | SARC | 0.162627122  |
| UCKL1 | Arginine and proline metε  | SARC | -0.011693806 |
| UCKL1 | Arginine biosynthesis      | SARC | 0.067241542  |
| UCKL1 | Ascorbate and aldarate mε  | SARC | -0.163540018 |
| UCKL1 | Atypical memory b cell     | SARC | 0.074646722  |
| UCKL1 | Axl+siglec6+ dendritic ce  | SARC | -0.085285514 |

|       |                             |      |              |
|-------|-----------------------------|------|--------------|
| UCKL1 | B cell                      | SARC | -0.001774754 |
| UCKL1 | B1 cell                     | SARC | 0.009932137  |
| UCKL1 | Basal cell                  | SARC | 0.056751778  |
| UCKL1 | Beta-alanine metabolism     | SARC | -0.144234409 |
| UCKL1 | Biosynthesis of unsaturate  | SARC | -0.122106477 |
| UCKL1 | Biotin metabolism           | SARC | -0.108066371 |
| UCKL1 | Butanoate metabolism        | SARC | -0.002174108 |
| UCKL1 | Caffeine metabolism         | SARC | -0.143965155 |
| UCKL1 | Cancer stem cell            | SARC | -0.087612223 |
| UCKL1 | Cancer stem-like cell       | SARC | -0.051034234 |
| UCKL1 | Cd4+ cytotoxic t cell       | SARC | -0.045448899 |
| UCKL1 | Cd4+ memory t cell          | SARC | -0.017193089 |
| UCKL1 | Cd4+ regulatory t cell      | SARC | 0.041998956  |
| UCKL1 | Cd4+ t helper cell          | SARC | 0.013053989  |
| UCKL1 | Cd4+cd25+ regulatory t c    | SARC | 0.015147789  |
| UCKL1 | Cd8+ cytotoxic t cell       | SARC | 0.042682386  |
| UCKL1 | Cd8+ regulatory t cell      | SARC | 0.025146981  |
| UCKL1 | Cell_cycle                  | SARC | -0.073603617 |
| UCKL1 | Chandran_metastasis_top     | SARC | -0.099910982 |
| UCKL1 | Citrate cycle (tca cycle)   | SARC | 0.084640794  |
| UCKL1 | Cysteine and methionine r   | SARC | 0.034466296  |
| UCKL1 | Cytokine induced killer c   | SARC | 0.012520659  |
| UCKL1 | D-arginine and d-ornithin   | SARC | 0.118129418  |
| UCKL1 | D-glutamine and d-glutan    | SARC | -0.24424301  |
| UCKL1 | Dendritic cell              | SARC | 0.002752507  |
| UCKL1 | Dna_repair                  | SARC | 0.336541633  |
| UCKL1 | Dna_replication             | SARC | 0.034199329  |
| UCKL1 | Double-negative memory      | SARC | 0.129544013  |
| UCKL1 | Drug metabolism - cytoch    | SARC | -0.024928828 |
| UCKL1 | Drug metabolism - other     | SARC | 0.151954371  |
| UCKL1 | E2f_targets                 | SARC | -0.01076313  |
| UCKL1 | Ecm_receptor_interaction    | SARC | -0.354450842 |
| UCKL1 | Effector cd4+ memory t (    | SARC | -0.069752276 |
| UCKL1 | Effector cd8+ memory t (    | SARC | -0.038980836 |
| UCKL1 | Effector memory t cell      | SARC | -0.02507581  |
| UCKL1 | Effector regulatory t (treg | SARC | 0.001767964  |
| UCKL1 | Elvidge_hif1a_targets_up    | SARC | -0.173972213 |
| UCKL1 | Endothelial cell            | SARC | -0.112135317 |
| UCKL1 | Eosinophil                  | SARC | -0.001627546 |
| UCKL1 | Ether lipid metabolism      | SARC | 0.031471049  |
| UCKL1 | Exhausted cd4+ t cell       | SARC | -0.124670807 |
| UCKL1 | Exhausted cd8+ t cell       | SARC | -0.045474756 |
| UCKL1 | Exhausted t cell            | SARC | 0.064236683  |



|       |                              |      |              |
|-------|------------------------------|------|--------------|
| UCKL1 | Fat cell (adipocyte)         | SARC | 0.089182976  |
| UCKL1 | Fatty acid biosynthesis      | SARC | -0.111656325 |
| UCKL1 | Fatty acid degradation       | SARC | -0.01212392  |
| UCKL1 | Fatty acid elongation        | SARC | 0.08581294   |
| UCKL1 | Fibroblast                   | SARC | -0.122869094 |
| UCKL1 | Folate biosynthesis          | SARC | 0.073482223  |
| UCKL1 | Follicular b cell            | SARC | 0.051108617  |
| UCKL1 | Follicular dendritic cell    | SARC | 0.018778386  |
| UCKL1 | Follicular helper (tfh) t ce | SARC | -0.017079775 |
| UCKL1 | Follicular t cell            | SARC | 0.132445838  |
| UCKL1 | Foxp3+il-17+ t cell          | SARC | 0.082842148  |
| UCKL1 | Fructose and mannose me      | SARC | 0.18637735   |
| UCKL1 | G2m_checkpoint               | SARC | -0.088674184 |
| UCKL1 | Galactose metabolism         | SARC | 0.085854939  |
| UCKL1 | Galie_tumor_stemness_ge      | SARC | -0.071076456 |
| UCKL1 | Glutathione metabolism       | SARC | 0.131296728  |
| UCKL1 | Glycerolipid metabolism      | SARC | -0.085717316 |
| UCKL1 | Glycerophospholipid metæ     | SARC | 0.130736107  |
| UCKL1 | Glycine, serine and threor   | SARC | 0.070535678  |
| UCKL1 | Glycolysis / gluconeogene    | SARC | 0.103006715  |
| UCKL1 | Glycosaminoglycan biosy1     | SARC | 0.053366077  |
| UCKL1 | Glycosaminoglycan biosy1     | SARC | 0.041218312  |
| UCKL1 | Glycosaminoglycan biosy1     | SARC | -0.077997844 |
| UCKL1 | Glycosaminoglycan degra      | SARC | -0.081732738 |
| UCKL1 | Glycosphingolipid biosyn1    | SARC | -0.145719142 |
| UCKL1 | Glycosphingolipid biosyn1    | SARC | -0.003780404 |
| UCKL1 | Glycosphingolipid biosyn1    | SARC | -0.049617175 |
| UCKL1 | Glycosylphosphatidylinos:    | SARC | 0.038102887  |
| UCKL1 | Glyoxylate and dicarboxy     | SARC | 0.201137224  |
| UCKL1 | Granulocyte                  | SARC | 0.017294522  |
| UCKL1 | Hedgehog_signaling           | SARC | -0.264694768 |
| UCKL1 | Histidine metabolism         | SARC | -0.101423629 |
| UCKL1 | Hypoxia                      | SARC | -0.077228396 |
| UCKL1 | Il-17alpha t cell            | SARC | 0.003331857  |
| UCKL1 | Il2_stat5_signaling          | SARC | -0.107224885 |
| UCKL1 | Il6_jak_stat3_signaling      | SARC | -0.066839376 |
| UCKL1 | Immune_checkpoints_tur       | SARC | -0.027473947 |
| UCKL1 | Immune_inhibition_cytok      | SARC | 0.055936475  |
| UCKL1 | Inositol phosphate metabo    | SARC | -0.396654875 |
| UCKL1 | Interleukin_6_signaling      | SARC | -0.421253818 |
| UCKL1 | Jaeger_metastasis_up         | SARC | -0.114147723 |
| UCKL1 | Jain_nfkb_signaling          | SARC | 0.089603471  |
| UCKL1 | Kras_signaling_up            | SARC | -0.102784045 |

|       |                             |      |              |
|-------|-----------------------------|------|--------------|
| UCKL1 | Linoleic acid metabolism    | SARC | 0.103997913  |
| UCKL1 | Lipoic acid metabolism      | SARC | 0.15452357   |
| UCKL1 | Lysine degradation          | SARC | -0.184177304 |
| UCKL1 | Lysosome                    | SARC | 0.009981455  |
| UCKL1 | M1 macrophage               | SARC | -0.013163962 |
| UCKL1 | M2 macrophage               | SARC | 0.01784371   |
| UCKL1 | Mannose type o-glycan bi    | SARC | 0.079417401  |
| UCKL1 | Mapk_signaling_pathway      | SARC | -0.312451958 |
| UCKL1 | Mapk3_erk1_activation       | SARC | -0.340144423 |
| UCKL1 | Marginal zone b cell        | SARC | -0.002948069 |
| UCKL1 | Memory b cell               | SARC | -0.024523482 |
| UCKL1 | Mesenchymal cell            | SARC | 0.019405768  |
| UCKL1 | Mesenchymal stem cell       | SARC | -0.187260106 |
| UCKL1 | Metabolism of xenobiotic    | SARC | 0.073874818  |
| UCKL1 | Migrating cancer stem cel   | SARC | -0.083759631 |
| UCKL1 | Mitotic_spindle             | SARC | -0.296106747 |
| UCKL1 | Monocyte                    | SARC | 0.03321819   |
| UCKL1 | Mtor_signaling_pathway      | SARC | -0.258528288 |
| UCKL1 | Mtorc1_signaling            | SARC | -0.011999337 |
| UCKL1 | Mucin type o-glycan biosy   | SARC | -0.271168535 |
| UCKL1 | Myc_targets_v1              | SARC | 0.232995569  |
| UCKL1 | Myeloid cell                | SARC | -0.013676594 |
| UCKL1 | N-glycan biosynthesis       | SARC | -0.097658975 |
| UCKL1 | Naive b cell                | SARC | 0.047497687  |
| UCKL1 | Naive cd4+ t cell           | SARC | 0.014334468  |
| UCKL1 | Naive cd8+ t cell           | SARC | 0.094219899  |
| UCKL1 | Natural killer cell         | SARC | -0.000714518 |
| UCKL1 | Natural killer t (nkt) cell | SARC | 0.133493892  |
| UCKL1 | Natural regulatory t (treg) | SARC | -0.017678861 |
| UCKL1 | Neomycin, kanamycin and     | SARC | 0.141170889  |
| UCKL1 | Neutrophil                  | SARC | 0.02663741   |
| UCKL1 | Nicotinate and nicotinami   | SARC | -0.106951517 |
| UCKL1 | Nitrogen metabolism         | SARC | -0.197551067 |
| UCKL1 | Nod_like_receptor_signal    | SARC | -0.031524044 |
| UCKL1 | Notch_signaling             | SARC | 0.032879564  |
| UCKL1 | One carbon pool by folate   | SARC | -0.05517583  |
| UCKL1 | Other glycan degradation    | SARC | 0.053117077  |
| UCKL1 | Other types of o-glycan b   | SARC | 0.146060178  |
| UCKL1 | Oxidative phosphorylatior   | SARC | 0.285389119  |
| UCKL1 | P53_pathway                 | SARC | 0.041939452  |
| UCKL1 | P53_signaling_pathway       | SARC | -0.210068151 |
| UCKL1 | Pantothenate and coa bios   | SARC | -0.01950856  |
| UCKL1 | Pentose and glucuronate in  | SARC | -0.008653547 |

|       |                            |      |              |
|-------|----------------------------|------|--------------|
| UCKL1 | Pentose phosphate pathwa   | SARC | 0.109197126  |
| UCKL1 | Pericyte                   | SARC | -0.040821337 |
| UCKL1 | Phenylalanine metabolism   | SARC | -0.034029045 |
| UCKL1 | Phenylalanine, tyrosine ar | SARC | 0.245343374  |
| UCKL1 | Phosphonate and phosphir   | SARC | -0.04190835  |
| UCKL1 | Pi3k_akt_activation        | SARC | -0.299165564 |
| UCKL1 | Pi3k_akt_mtor_signaling    | SARC | -0.142852187 |
| UCKL1 | Porphyrin and chlorophyl   | SARC | 0.075145705  |
| UCKL1 | Primary bile acid biosynt  | SARC | 0.041648103  |
| UCKL1 | Propanoate metabolism      | SARC | -0.02816436  |
| UCKL1 | Purine metabolism          | SARC | 0.123997454  |
| UCKL1 | Pyrimidine metabolism      | SARC | 0.235182674  |
| UCKL1 | Pyruvate metabolism        | SARC | 0.036466245  |
| UCKL1 | Regulation_of_autophagy    | SARC | -0.063584531 |
| UCKL1 | Retinol metabolism         | SARC | 0.020952143  |
| UCKL1 | Riboflavin metabolism      | SARC | 0.083176784  |
| UCKL1 | Schmahl_pdgf_signaling     | SARC | -0.343590414 |
| UCKL1 | Selenocompound metabol     | SARC | 0.025653217  |
| UCKL1 | Signaling_by_hippo         | SARC | -0.381581011 |
| UCKL1 | Sphingolipid metabolism    | SARC | -0.215601094 |
| UCKL1 | Starch and sucrose metabo  | SARC | -0.167365754 |
| UCKL1 | Steroid biosynthesis       | SARC | 0.136024315  |
| UCKL1 | Steroid hormone biosynth   | SARC | 0.007056998  |
| UCKL1 | Sulfur metabolism          | SARC | -0.034190662 |
| UCKL1 | Synthesis and degradation  | SARC | 0.090329635  |
| UCKL1 | T helper cell              | SARC | -0.028207428 |
| UCKL1 | T helper1 (th1) cell       | SARC | -0.007297593 |
| UCKL1 | T helper17 (th17) cell     | SARC | -0.036866758 |
| UCKL1 | T helper2 (th2) cell       | SARC | 0.007961872  |
| UCKL1 | T helper9 (th9) cell       | SARC | 0.041130435  |
| UCKL1 | Taurine and hypotaurine r  | SARC | 0.167109747  |
| UCKL1 | Terpenoid backbone biosy   | SARC | 0.009231636  |
| UCKL1 | Tgf_beta_signaling_pathw   | SARC | -0.309477958 |
| UCKL1 | Thiamine metabolism        | SARC | 0.170177889  |
| UCKL1 | Tnfa_signaling_via_nfkb    | SARC | -0.038627404 |
| UCKL1 | Tryptophan metabolism      | SARC | -0.077335471 |
| UCKL1 | Tumor endothelial cell     | SARC | 0.074660559  |
| UCKL1 | Tyrosine metabolism        | SARC | 0.059897017  |
| UCKL1 | Ubiquinone and other terç  | SARC | 0.101872971  |
| UCKL1 | Valine, leucine and isoleu | SARC | 0.056051244  |
| UCKL1 | Valine, leucine and isoleu | SARC | -0.024824815 |
| UCKL1 | Vascular endothelial cell  | SARC | -0.094409297 |
| UCKL1 | Vascular smooth muscle c   | SARC | -0.327825888 |

|       |                            |      |              |
|-------|----------------------------|------|--------------|
| UCKL1 | Vegf_signaling_pathway     | SARC | -0.116909149 |
| UCKL1 | Vitamin b6 metabolism      | SARC | 0.088539193  |
| UCKL1 | Willert_wnt_signaling      | SARC | 0.049936303  |
| UCKL1 | Wnt_beta_catenin_signali   | SARC | 0.057210941  |
| UPP1  | Abnormal plasma cell       | SARC | -0.235529179 |
| UPP1  | Activated b cell           | SARC | 0.468473815  |
| UPP1  | Activated cd4+ t cell      | SARC | 0.450809795  |
| UPP1  | Activated t cell           | SARC | 0.399367564  |
| UPP1  | Alanine, aspartate and glu | SARC | -0.085726514 |
| UPP1  | Alcala_apoptosis           | SARC | 0.467343655  |
| UPP1  | Alpha-linolenic acid meta  | SARC | 0.246786121  |
| UPP1  | Amino sugar and nucleoti   | SARC | 0.518561051  |
| UPP1  | Ampk_pathway               | SARC | -0.239155324 |
| UPP1  | Angiogenesis               | SARC | 0.303052885  |
| UPP1  | Arachidonic acid metaboli  | SARC | 0.368705905  |
| UPP1  | Arginine and proline metæ  | SARC | 0.262915363  |
| UPP1  | Arginine biosynthesis      | SARC | 0.014571652  |
| UPP1  | Ascorbate and aldarate mε  | SARC | 0.075573895  |
| UPP1  | Atypical memory b cell     | SARC | 0.380974947  |
| UPP1  | Axl+siglec6+ dendritic ce  | SARC | 0.323859112  |
| UPP1  | B cell                     | SARC | 0.400313809  |
| UPP1  | B1 cell                    | SARC | 0.331054036  |
| UPP1  | Basal cell                 | SARC | 0.380963534  |
| UPP1  | Beta-alanine metabolism    | SARC | 0.020565632  |
| UPP1  | Biosynthesis of unsaturate | SARC | 0.024690994  |
| UPP1  | Biotin metabolism          | SARC | 0.01356874   |
| UPP1  | Butanoate metabolism       | SARC | -0.055520338 |
| UPP1  | Caffeine metabolism        | SARC | 0.024890912  |
| UPP1  | Cancer stem cell           | SARC | 0.180669069  |
| UPP1  | Cancer stem-like cell      | SARC | 0.205223812  |
| UPP1  | Cd4+ cytotoxic t cell      | SARC | 0.461340778  |
| UPP1  | Cd4+ memory t cell         | SARC | 0.333068628  |
| UPP1  | Cd4+ regulatory t cell     | SARC | 0.431670543  |
| UPP1  | Cd4+ t helper cell         | SARC | 0.449390279  |
| UPP1  | Cd4+cd25+ regulatory t c   | SARC | 0.446348952  |
| UPP1  | Cd8+ cytotoxic t cell      | SARC | 0.437784668  |
| UPP1  | Cd8+ regulatory t cell     | SARC | 0.361172425  |
| UPP1  | Cell_cycle                 | SARC | -0.083425603 |
| UPP1  | Chandran_metastasis_top5   | SARC | -0.258544914 |
| UPP1  | Citrate cycle (tca cycle)  | SARC | 0.267380166  |
| UPP1  | Cysteine and methionine r  | SARC | 0.305064073  |
| UPP1  | Cytokine induced killer cε | SARC | 0.128580901  |
| UPP1  | D-arginine and d-ornithin  | SARC | 0.187099094  |

|      |                              |      |              |
|------|------------------------------|------|--------------|
| UPP1 | D-glutamine and d-glutan     | SARC | -0.33984659  |
| UPP1 | Dendritic cell               | SARC | 0.429724638  |
| UPP1 | Dna_repair                   | SARC | 0.354002655  |
| UPP1 | Dna_replication              | SARC | 0.181255786  |
| UPP1 | Double-negative memory       | SARC | 0.316426321  |
| UPP1 | Drug metabolism - cytoch     | SARC | 0.200766334  |
| UPP1 | Drug metabolism - other      | SARC | 0.472126959  |
| UPP1 | E2f_targets                  | SARC | -0.002874208 |
| UPP1 | Ecm_receptor_interaction     | SARC | 0.064635675  |
| UPP1 | Effector cd4+ memory t (     | SARC | 0.367278842  |
| UPP1 | Effector cd8+ memory t (     | SARC | 0.468694915  |
| UPP1 | Effector memory t cell       | SARC | 0.417587794  |
| UPP1 | Effector regulatory t (treg  | SARC | 0.420823254  |
| UPP1 | Elvidge_hif1a_targets_up     | SARC | 0.118062468  |
| UPP1 | Endothelial cell             | SARC | 0.119545013  |
| UPP1 | Eosinophil                   | SARC | 0.512334373  |
| UPP1 | Ether lipid metabolism       | SARC | 0.196733417  |
| UPP1 | Exhausted cd4+ t cell        | SARC | 0.433767019  |
| UPP1 | Exhausted cd8+ t cell        | SARC | 0.454698039  |
| UPP1 | Exhausted t cell             | SARC | 0.429565822  |
| UPP1 | Fat cell (adipocyte)         | SARC | 0.007755532  |
| UPP1 | Fatty acid biosynthesis      | SARC | 0.119295979  |
| UPP1 | Fatty acid degradation       | SARC | 0.048380718  |
| UPP1 | Fatty acid elongation        | SARC | 0.134442188  |
| UPP1 | Fibroblast                   | SARC | 0.321410258  |
| UPP1 | Folate biosynthesis          | SARC | 0.410350908  |
| UPP1 | Follicular b cell            | SARC | 0.34217378   |
| UPP1 | Follicular dendritic cell    | SARC | 0.193077956  |
| UPP1 | Follicular helper (tfh) t ce | SARC | 0.440288664  |
| UPP1 | Follicular t cell            | SARC | 0.277925084  |
| UPP1 | Foxp3+il-17+ t cell          | SARC | 0.20129692   |
| UPP1 | Fructose and mannose me      | SARC | 0.454223792  |
| UPP1 | G2m_checkpoint               | SARC | -0.107740714 |
| UPP1 | Galactose metabolism         | SARC | 0.50255402   |
| UPP1 | Galie_tumor_stemness_ge      | SARC | -0.083606286 |
| UPP1 | Glutathione metabolism       | SARC | 0.551076933  |
| UPP1 | Glycerolipid metabolism      | SARC | 0.190724792  |
| UPP1 | Glycerophospholipid metæ     | SARC | 0.296072378  |
| UPP1 | Glycine, serine and threor   | SARC | 0.317996332  |
| UPP1 | Glycolysis / gluconeogene    | SARC | 0.404914637  |
| UPP1 | Glycosaminoglycan biosy      | SARC | 0.202793291  |
| UPP1 | Glycosaminoglycan biosy      | SARC | -0.052302197 |
| UPP1 | Glycosaminoglycan biosy      | SARC | 0.159381395  |

|      |                           |      |              |
|------|---------------------------|------|--------------|
| UPP1 | Glycosaminoglycan degra   | SARC | 0.324872507  |
| UPP1 | Glycosphingolipid biosyn  | SARC | 0.38480341   |
| UPP1 | Glycosphingolipid biosyn  | SARC | 0.298794091  |
| UPP1 | Glycosphingolipid biosyn  | SARC | 0.104386472  |
| UPP1 | Glycosylphosphatidylinos  | SARC | 0.046870741  |
| UPP1 | Glyoxylate and dicarboxy  | SARC | 0.24885996   |
| UPP1 | Granulocyte               | SARC | 0.52514069   |
| UPP1 | Hedgehog_signaling        | SARC | -0.404838017 |
| UPP1 | Histidine metabolism      | SARC | -0.03130921  |
| UPP1 | Hypoxia                   | SARC | 0.452240698  |
| UPP1 | Il-17alpha t cell         | SARC | 0.402652946  |
| UPP1 | Il2_stat5_signaling       | SARC | 0.489180978  |
| UPP1 | Il6_jak_stat3_signaling   | SARC | 0.438431482  |
| UPP1 | Immune_checkpoints_tur    | SARC | 0.567852546  |
| UPP1 | Immune_inhibition_cytok   | SARC | 0.486513428  |
| UPP1 | Inositol phosphate metabo | SARC | -0.265341249 |
| UPP1 | Interleukin_6_signaling   | SARC | -0.044800508 |
| UPP1 | Jaeger_metastasis_up      | SARC | 0.309138556  |
| UPP1 | Jain_nfkb_signaling       | SARC | 0.157999819  |
| UPP1 | Kras_signaling_up         | SARC | 0.40780661   |
| UPP1 | Linoleic acid metabolism  | SARC | 0.138506008  |
| UPP1 | Lipoic acid metabolism    | SARC | -0.14445801  |
| UPP1 | Lysine degradation        | SARC | -0.351586325 |
| UPP1 | Lysosome                  | SARC | 0.51347806   |
| UPP1 | M1 macrophage             | SARC | 0.519280801  |
| UPP1 | M2 macrophage             | SARC | 0.455969544  |
| UPP1 | Mannose type o-glycan bi  | SARC | -0.228143519 |
| UPP1 | Mapk_signaling_pathway    | SARC | 0.054759933  |
| UPP1 | Mapk3_erk1_activation     | SARC | -0.055874756 |
| UPP1 | Marginal zone b cell      | SARC | 0.324389278  |
| UPP1 | Memory b cell             | SARC | 0.383678043  |
| UPP1 | Mesenchymal cell          | SARC | 0.117683114  |
| UPP1 | Mesenchymal stem cell     | SARC | 0.382682666  |
| UPP1 | Metabolism of xenobiotic  | SARC | 0.320611742  |
| UPP1 | Migrating cancer stem cel | SARC | 0.263639289  |
| UPP1 | Mitotic_spindle           | SARC | -0.26136281  |
| UPP1 | Monocyte                  | SARC | 0.547765745  |
| UPP1 | Mtor_signaling_pathway    | SARC | -0.080026476 |
| UPP1 | Mtorc1_signaling          | SARC | 0.455773857  |
| UPP1 | Mucin type o-glycan bios  | SARC | 0.039526798  |
| UPP1 | Myc_targets_v1            | SARC | 0.219923663  |
| UPP1 | Myeloid cell              | SARC | 0.457565429  |
| UPP1 | N-glycan biosynthesis     | SARC | 0.266216145  |

|      |                             |      |              |
|------|-----------------------------|------|--------------|
| UPP1 | Naive b cell                | SARC | 0.068716283  |
| UPP1 | Naive cd4+ t cell           | SARC | 0.261323386  |
| UPP1 | Naive cd8+ t cell           | SARC | 0.003495457  |
| UPP1 | Natural killer cell         | SARC | 0.467839809  |
| UPP1 | Natural killer t (nkt) cell | SARC | 0.495097252  |
| UPP1 | Natural regulatory t (treg) | SARC | 0.434354993  |
| UPP1 | Neomycin, kanamycin and     | SARC | 0.513840998  |
| UPP1 | Neutrophil                  | SARC | 0.550073421  |
| UPP1 | Nicotinate and nicotinami   | SARC | 0.352435896  |
| UPP1 | Nitrogen metabolism         | SARC | -0.116148632 |
| UPP1 | Nod_like_receptor_signal    | SARC | 0.427081567  |
| UPP1 | Notch_signaling             | SARC | -0.027529265 |
| UPP1 | One carbon pool by folate   | SARC | -0.080139251 |
| UPP1 | Other glycan degradation    | SARC | 0.391087187  |
| UPP1 | Other types of o-glycan b   | SARC | 0.187356239  |
| UPP1 | Oxidative phosphorylatio    | SARC | 0.474343022  |
| UPP1 | P53_pathway                 | SARC | 0.42669691   |
| UPP1 | P53_signaling_pathway       | SARC | -0.108634065 |
| UPP1 | Pantothenate and coa bios   | SARC | 0.400427348  |
| UPP1 | Pentose and glucuronate i   | SARC | 0.308296725  |
| UPP1 | Pentose phosphate pathwa    | SARC | 0.417874775  |
| UPP1 | Pericyte                    | SARC | 0.194737098  |
| UPP1 | Phenylalanine metabolism    | SARC | 0.251213024  |
| UPP1 | Phenylalanine, tyrosine ar  | SARC | 0.350651405  |
| UPP1 | Phosphonate and phosphir    | SARC | 0.27525494   |
| UPP1 | Pi3k_akt_activation         | SARC | -0.11472214  |
| UPP1 | Pi3k_akt_mtor_signaling     | SARC | 0.425581319  |
| UPP1 | Porphyrin and chlorophyl    | SARC | 0.360173049  |
| UPP1 | Primary bile acid biosynt   | SARC | 0.287890307  |
| UPP1 | Propanoate metabolism       | SARC | -0.185879071 |
| UPP1 | Purine metabolism           | SARC | 0.204687289  |
| UPP1 | Pyrimidine metabolism       | SARC | 0.275461274  |
| UPP1 | Pyruvate metabolism         | SARC | 0.136969781  |
| UPP1 | Regulation_of_autophagy     | SARC | 0.337637633  |
| UPP1 | Retinol metabolism          | SARC | 0.220348136  |
| UPP1 | Riboflavin metabolism       | SARC | 0.465857513  |
| UPP1 | Schmahl_pdgf_signaling      | SARC | -0.07321762  |
| UPP1 | Selenocompound metabol      | SARC | -0.12729204  |
| UPP1 | Signaling_by_hippo          | SARC | -0.304780041 |
| UPP1 | Sphingolipid metabolism     | SARC | 0.157234393  |
| UPP1 | Starch and sucrose metabo   | SARC | 0.386842988  |
| UPP1 | Steroid biosynthesis        | SARC | 0.199598497  |
| UPP1 | Steroid hormone biosynth    | SARC | 0.312234886  |

|      |                            |      |              |
|------|----------------------------|------|--------------|
| UPP1 | Sulfur metabolism          | SARC | -0.079355577 |
| UPP1 | Synthesis and degradation  | SARC | 0.152800738  |
| UPP1 | T helper cell              | SARC | 0.428318448  |
| UPP1 | T helper1 (th1) cell       | SARC | 0.463410709  |
| UPP1 | T helper17 (th17) cell     | SARC | 0.454344074  |
| UPP1 | T helper2 (th2) cell       | SARC | 0.42012222   |
| UPP1 | T helper9 (th9) cell       | SARC | 0.413512109  |
| UPP1 | Taurine and hypotaurine r  | SARC | 0.045150929  |
| UPP1 | Terpenoid backbone biosy   | SARC | 0.145561125  |
| UPP1 | Tgf_beta_signaling_pathw   | SARC | -0.347004874 |
| UPP1 | Thiamine metabolism        | SARC | 0.40558146   |
| UPP1 | Tnfa_signaling_via_nfkb    | SARC | 0.474664635  |
| UPP1 | Tryptophan metabolism      | SARC | 0.164510782  |
| UPP1 | Tumor endothelial cell     | SARC | 0.369374241  |
| UPP1 | Tyrosine metabolism        | SARC | 0.222891092  |
| UPP1 | Ubiquinone and other terç  | SARC | 0.142078827  |
| UPP1 | Valine, leucine and isoleu | SARC | 0.53630865   |
| UPP1 | Valine, leucine and isoleu | SARC | -0.062829623 |
| UPP1 | Vascular endothelial cell  | SARC | 0.292955277  |
| UPP1 | Vascular smooth muscle c   | SARC | -0.087904817 |
| UPP1 | Vegf_signaling_pathway     | SARC | 0.23034053   |
| UPP1 | Vitamin b6 metabolism      | SARC | 0.257202359  |
| UPP1 | Willert_wnt_signaling      | SARC | 0.132264083  |
| UPP1 | Wnt_beta_catenin_signali   | SARC | -0.334825881 |
| UPP2 | Abnormal plasma cell       | SARC | 0.03503837   |
| UPP2 | Activated b cell           | SARC | -0.216178993 |
| UPP2 | Activated cd4+ t cell      | SARC | -0.262873134 |
| UPP2 | Activated t cell           | SARC | -0.251793352 |
| UPP2 | Alanine, aspartate and glu | SARC | 0.01594163   |
| UPP2 | Alcala_apoptosis           | SARC | -0.257216677 |
| UPP2 | Alpha-linolenic acid meta  | SARC | -0.188935226 |
| UPP2 | Amino sugar and nucleoti   | SARC | -0.223446444 |
| UPP2 | Ampk_pathway               | SARC | 0.11488292   |
| UPP2 | Angiogenesis               | SARC | -0.056415717 |
| UPP2 | Arachidonic acid metabol   | SARC | -0.134620371 |
| UPP2 | Arginine and proline metæ  | SARC | -0.221947486 |
| UPP2 | Arginine biosynthesis      | SARC | -0.086028125 |
| UPP2 | Ascorbate and aldarate mæ  | SARC | -0.09043432  |
| UPP2 | Atypical memory b cell     | SARC | -0.197610747 |
| UPP2 | Axl+siglec6+ dendritic ce  | SARC | -0.206708195 |
| UPP2 | B cell                     | SARC | -0.239162872 |
| UPP2 | B1 cell                    | SARC | -0.239796223 |
| UPP2 | Basal cell                 | SARC | -0.19380602  |



|      |                             |      |              |
|------|-----------------------------|------|--------------|
| UPP2 | Beta-alanine metabolism     | SARC | -0.192187654 |
| UPP2 | Biosynthesis of unsaturate  | SARC | -0.16182776  |
| UPP2 | Biotin metabolism           | SARC | -0.01716564  |
| UPP2 | Butanoate metabolism        | SARC | -0.070530299 |
| UPP2 | Caffeine metabolism         | SARC | -0.162390271 |
| UPP2 | Cancer stem cell            | SARC | -0.119927132 |
| UPP2 | Cancer stem-like cell       | SARC | -0.178261733 |
| UPP2 | Cd4+ cytotoxic t cell       | SARC | -0.297636058 |
| UPP2 | Cd4+ memory t cell          | SARC | -0.249032888 |
| UPP2 | Cd4+ regulatory t cell      | SARC | -0.196114966 |
| UPP2 | Cd4+ t helper cell          | SARC | -0.252985866 |
| UPP2 | Cd4+cd25+ regulatory t c    | SARC | -0.246244445 |
| UPP2 | Cd8+ cytotoxic t cell       | SARC | -0.27224562  |
| UPP2 | Cd8+ regulatory t cell      | SARC | -0.209251449 |
| UPP2 | Cell_cycle                  | SARC | -0.016726547 |
| UPP2 | Chandran_metastasis_top5    | SARC | 0.111333232  |
| UPP2 | Citrate cycle (tca cycle)   | SARC | -0.192602582 |
| UPP2 | Cysteine and methionine r   | SARC | -0.132281783 |
| UPP2 | Cytokine induced killer c   | SARC | -0.147281335 |
| UPP2 | D-arginine and d-ornithin   | SARC | -0.070474346 |
| UPP2 | D-glutamine and d-glutan    | SARC | 0.095804261  |
| UPP2 | Dendritic cell              | SARC | -0.216433507 |
| UPP2 | Dna_repair                  | SARC | -0.093506813 |
| UPP2 | Dna_replication             | SARC | -0.110306928 |
| UPP2 | Double-negative memory      | SARC | -0.20783417  |
| UPP2 | Drug metabolism - cytoch    | SARC | -0.106836323 |
| UPP2 | Drug metabolism - other     | SARC | -0.198653945 |
| UPP2 | E2f_targets                 | SARC | -0.06450255  |
| UPP2 | Ecm_receptor_interaction    | SARC | -0.139122047 |
| UPP2 | Effector cd4+ memory t (    | SARC | -0.243420185 |
| UPP2 | Effector cd8+ memory t (    | SARC | -0.266706655 |
| UPP2 | Effector memory t cell      | SARC | -0.255850733 |
| UPP2 | Effector regulatory t (treg | SARC | -0.208476217 |
| UPP2 | Elvidge_hif1a_targets_up    | SARC | -0.207176214 |
| UPP2 | Endothelial cell            | SARC | -0.125976102 |
| UPP2 | Eosinophil                  | SARC | -0.257063454 |
| UPP2 | Ether lipid metabolism      | SARC | -0.094262676 |
| UPP2 | Exhausted cd4+ t cell       | SARC | -0.295130111 |
| UPP2 | Exhausted cd8+ t cell       | SARC | -0.27293441  |
| UPP2 | Exhausted t cell            | SARC | -0.231913653 |
| UPP2 | Fat cell (adipocyte)        | SARC | 0.023012498  |
| UPP2 | Fatty acid biosynthesis     | SARC | -0.09864464  |
| UPP2 | Fatty acid degradation      | SARC | -0.130520893 |

|      |                              |      |              |
|------|------------------------------|------|--------------|
| UPP2 | Fatty acid elongation        | SARC | -0.093844414 |
| UPP2 | Fibroblast                   | SARC | -0.147660394 |
| UPP2 | Folate biosynthesis          | SARC | -0.200438755 |
| UPP2 | Follicular b cell            | SARC | -0.130663951 |
| UPP2 | Follicular dendritic cell    | SARC | -0.11071723  |
| UPP2 | Follicular helper (tfh) t ce | SARC | -0.219650496 |
| UPP2 | Follicular t cell            | SARC | -0.075197597 |
| UPP2 | Foxp3+il-17+ t cell          | SARC | -0.135596464 |
| UPP2 | Fructose and mannose me      | SARC | -0.197430147 |
| UPP2 | G2m_checkpoint               | SARC | -0.040746184 |
| UPP2 | Galactose metabolism         | SARC | -0.215916063 |
| UPP2 | Galie_tumor_stemness_ge      | SARC | 0.068852809  |
| UPP2 | Glutathione metabolism       | SARC | -0.180317437 |
| UPP2 | Glycerolipid metabolism      | SARC | -0.215478061 |
| UPP2 | Glycerophospholipid metæ     | SARC | -0.196652471 |
| UPP2 | Glycine, serine and threor   | SARC | -0.122120223 |
| UPP2 | Glycolysis / gluconeogene    | SARC | -0.234249177 |
| UPP2 | Glycosaminoglycan biosy1     | SARC | 0.013473729  |
| UPP2 | Glycosaminoglycan biosy1     | SARC | 0.240838716  |
| UPP2 | Glycosaminoglycan biosy1     | SARC | -0.022002549 |
| UPP2 | Glycosaminoglycan degra      | SARC | -0.11695051  |
| UPP2 | Glycosphingolipid biosyn1    | SARC | -0.065697214 |
| UPP2 | Glycosphingolipid biosyn1    | SARC | -0.025873029 |
| UPP2 | Glycosphingolipid biosyn1    | SARC | 0.032110623  |
| UPP2 | Glycosylphosphatidylinos:    | SARC | 0.028572248  |
| UPP2 | Glyoxylate and dicarboxy     | SARC | -0.175067862 |
| UPP2 | Granulocyte                  | SARC | -0.236330499 |
| UPP2 | Hedgehog_signaling           | SARC | 0.165478329  |
| UPP2 | Histidine metabolism         | SARC | -0.126914464 |
| UPP2 | Hypoxia                      | SARC | -0.203532801 |
| UPP2 | Il-17ralpha t cell           | SARC | -0.273837854 |
| UPP2 | Il2_stat5_signaling          | SARC | -0.252593303 |
| UPP2 | Il6_jak_stat3_signaling      | SARC | -0.236171586 |
| UPP2 | Immune_checkpoints_tunr      | SARC | -0.261143827 |
| UPP2 | Immune_inhibition_cytok      | SARC | -0.250047405 |
| UPP2 | Inositol phosphate metabo    | SARC | -0.067337756 |
| UPP2 | Interleukin_6_signaling      | SARC | -0.062106804 |
| UPP2 | Jaeger_metastasis_up         | SARC | -0.207690059 |
| UPP2 | Jain_nfkb_signaling          | SARC | 0.005549929  |
| UPP2 | Kras_signaling_up            | SARC | -0.182338899 |
| UPP2 | Linoleic acid metabolism     | SARC | -0.079010367 |
| UPP2 | Lipoic acid metabolism       | SARC | 0.073773408  |
| UPP2 | Lysine degradation           | SARC | 0.052071585  |

|      |                             |      |              |
|------|-----------------------------|------|--------------|
| UPP2 | Lysosome                    | SARC | -0.133519148 |
| UPP2 | M1 macrophage               | SARC | -0.23307995  |
| UPP2 | M2 macrophage               | SARC | -0.210361567 |
| UPP2 | Mannose type o-glycan bi    | SARC | 0.132660225  |
| UPP2 | Mapk_signaling_pathway      | SARC | -0.166551869 |
| UPP2 | Mapk3_erk1_activation       | SARC | -0.004937344 |
| UPP2 | Marginal zone b cell        | SARC | -0.184750267 |
| UPP2 | Memory b cell               | SARC | -0.222351199 |
| UPP2 | Mesenchymal cell            | SARC | -0.00114025  |
| UPP2 | Mesenchymal stem cell       | SARC | -0.254502993 |
| UPP2 | Metabolism of xenobiotic    | SARC | -0.161893365 |
| UPP2 | Migrating cancer stem cel   | SARC | -0.24755123  |
| UPP2 | Mitotic_spindle             | SARC | -0.021226451 |
| UPP2 | Monocyte                    | SARC | -0.253658946 |
| UPP2 | Mtor_signaling_pathway      | SARC | -0.129407153 |
| UPP2 | Mtorc1_signaling            | SARC | -0.182604251 |
| UPP2 | Mucin type o-glycan bios    | SARC | -0.027398509 |
| UPP2 | Myc_targets_v1              | SARC | -0.050980423 |
| UPP2 | Myeloid cell                | SARC | -0.234633727 |
| UPP2 | N-glycan biosynthesis       | SARC | -0.069734222 |
| UPP2 | Naive b cell                | SARC | -0.091866337 |
| UPP2 | Naive cd4+ t cell           | SARC | -0.129622941 |
| UPP2 | Naive cd8+ t cell           | SARC | -0.016616135 |
| UPP2 | Natural killer cell         | SARC | -0.261661033 |
| UPP2 | Natural killer t (nkt) cell | SARC | -0.267634652 |
| UPP2 | Natural regulatory t (treg) | SARC | -0.237793279 |
| UPP2 | Neomycin, kanamycin and     | SARC | -0.150244501 |
| UPP2 | Neutrophil                  | SARC | -0.227267362 |
| UPP2 | Nicotinate and nicotinami   | SARC | -0.184695409 |
| UPP2 | Nitrogen metabolism         | SARC | -0.044278594 |
| UPP2 | Nod_like_receptor_signal    | SARC | -0.209020549 |
| UPP2 | Notch_signaling             | SARC | 0.116863243  |
| UPP2 | One carbon pool by folate   | SARC | -0.078440734 |
| UPP2 | Other glycan degradation    | SARC | -0.119273196 |
| UPP2 | Other types of o-glycan b   | SARC | 0.034045328  |
| UPP2 | Oxidative phosphorylatio    | SARC | -0.152524022 |
| UPP2 | P53_pathway                 | SARC | -0.179967834 |
| UPP2 | P53_signaling_pathway       | SARC | -0.116647076 |
| UPP2 | Pantothenate and coa bios   | SARC | -0.140996329 |
| UPP2 | Pentose and glucuronate in  | SARC | -0.088344075 |
| UPP2 | Pentose phosphate pathwa    | SARC | -0.180575025 |
| UPP2 | Pericyte                    | SARC | -0.05001859  |
| UPP2 | Phenylalanine metabolism    | SARC | -0.228135694 |

|      |                            |      |              |
|------|----------------------------|------|--------------|
| UPP2 | Phenylalanine, tyrosine ar | SARC | -0.072110448 |
| UPP2 | Phosphonate and phosphir   | SARC | -0.052553453 |
| UPP2 | Pi3k_akt_activation        | SARC | 0.000779772  |
| UPP2 | Pi3k_akt_mtor_signaling    | SARC | -0.293935908 |
| UPP2 | Porphyrin and chlorophyl   | SARC | -0.168768473 |
| UPP2 | Primary bile acid biosynt  | SARC | 0.10406345   |
| UPP2 | Propanoate metabolism      | SARC | -0.013923442 |
| UPP2 | Purine metabolism          | SARC | -0.183304857 |
| UPP2 | Pyrimidine metabolism      | SARC | -0.083525263 |
| UPP2 | Pyruvate metabolism        | SARC | -0.172166077 |
| UPP2 | Regulation_of_autophagy    | SARC | -0.075045746 |
| UPP2 | Retinol metabolism         | SARC | -0.051807065 |
| UPP2 | Riboflavin metabolism      | SARC | -0.144125348 |
| UPP2 | Schmahl_pdgf_signaling     | SARC | -0.075786202 |
| UPP2 | Selenocompound metabol     | SARC | 0.026721372  |
| UPP2 | Signaling_by_hippo         | SARC | 0.031125756  |
| UPP2 | Sphingolipid metabolism    | SARC | -0.083873278 |
| UPP2 | Starch and sucrose metabo  | SARC | -0.232211829 |
| UPP2 | Steroid biosynthesis       | SARC | -0.132175699 |
| UPP2 | Steroid hormone biosynth   | SARC | -0.04554516  |
| UPP2 | Sulfur metabolism          | SARC | -0.079482784 |
| UPP2 | Synthesis and degradation  | SARC | -0.161944589 |
| UPP2 | T helper cell              | SARC | -0.223338897 |
| UPP2 | T helper1 (th1) cell       | SARC | -0.244082111 |
| UPP2 | T helper17 (th17) cell     | SARC | -0.219531009 |
| UPP2 | T helper2 (th2) cell       | SARC | -0.219484354 |
| UPP2 | T helper9 (th9) cell       | SARC | -0.241546743 |
| UPP2 | Taurine and hypotaurine r  | SARC | 0.055679798  |
| UPP2 | Terpenoid backbone biosy   | SARC | -0.093375907 |
| UPP2 | Tgf_beta_signaling_pathw   | SARC | 0.171752536  |
| UPP2 | Thiamine metabolism        | SARC | -0.093280279 |
| UPP2 | Tnfa_signaling_via_nfkb    | SARC | -0.211874526 |
| UPP2 | Tryptophan metabolism      | SARC | -0.212273505 |
| UPP2 | Tumor endothelial cell     | SARC | -0.110815022 |
| UPP2 | Tyrosine metabolism        | SARC | -0.152405989 |
| UPP2 | Ubiquinone and other ter   | SARC | -0.108267789 |
| UPP2 | Valine, leucine and isoleu | SARC | -0.145146073 |
| UPP2 | Valine, leucine and isoleu | SARC | -0.071366354 |
| UPP2 | Vascular endothelial cell  | SARC | -0.11438009  |
| UPP2 | Vascular smooth muscle c   | SARC | -0.199417948 |
| UPP2 | Vegf_signaling_pathway     | SARC | -0.112451381 |
| UPP2 | Vitamin b6 metabolism      | SARC | -0.039071891 |
| UPP2 | Willert_wnt_signaling      | SARC | 0.006421236  |

|      |                            |      |              |
|------|----------------------------|------|--------------|
| UPP2 | Wnt_beta_catenin_signali   | SARC | 0.199628667  |
| CDA  | Abnormal plasma cell       | SKCM | 0.298247119  |
| CDA  | Activated b cell           | SKCM | 0.010544528  |
| CDA  | Activated cd4+ t cell      | SKCM | -0.111123761 |
| CDA  | Activated t cell           | SKCM | -0.022509107 |
| CDA  | Alanine, aspartate and glu | SKCM | -0.025224841 |
| CDA  | Alcala_apoptosis           | SKCM | 0.082552148  |
| CDA  | Alpha-linolenic acid meta  | SKCM | 0.844874697  |
| CDA  | Amino sugar and nucleoti   | SKCM | -0.005257515 |
| CDA  | Ampk_pathway               | SKCM | -0.211690331 |
| CDA  | Angiogenesis               | SKCM | 0.306441228  |
| CDA  | Arachidonic acid metabol:  | SKCM | 0.842425389  |
| CDA  | Arginine and proline metæ  | SKCM | 0.50657755   |
| CDA  | Arginine biosynthesis      | SKCM | 0.532468454  |
| CDA  | Ascorbate and aldarate me  | SKCM | 0.426700289  |
| CDA  | Atypical memory b cell     | SKCM | -0.117311242 |
| CDA  | Axl+siglec6+ dendritic ce  | SKCM | 0.405427877  |
| CDA  | B cell                     | SKCM | -0.110244226 |
| CDA  | B1 cell                    | SKCM | 0.129921166  |
| CDA  | Basal cell                 | SKCM | 0.90244209   |
| CDA  | Beta-alanine metabolism    | SKCM | 0.410454377  |
| CDA  | Biosynthesis of unsaturate | SKCM | 0.142203212  |
| CDA  | Biotin metabolism          | SKCM | -0.298089231 |
| CDA  | Butanoate metabolism       | SKCM | 0.112894418  |
| CDA  | Caffeine metabolism        | SKCM | 0.191411168  |
| CDA  | Cancer stem cell           | SKCM | 0.460784249  |
| CDA  | Cancer stem-like cell      | SKCM | 0.103444632  |
| CDA  | Cd4+ cytotoxic t cell      | SKCM | 0.223645719  |
| CDA  | Cd4+ memory t cell         | SKCM | 0.042322075  |
| CDA  | Cd4+ regulatory t cell     | SKCM | 0.073512498  |
| CDA  | Cd4+ t helper cell         | SKCM | 0.053006218  |
| CDA  | Cd4+cd25+ regulatory t c   | SKCM | 0.030562636  |
| CDA  | Cd8+ cytotoxic t cell      | SKCM | 0.129746513  |
| CDA  | Cd8+ regulatory t cell     | SKCM | -0.056020522 |
| CDA  | Cell_cycle                 | SKCM | -0.43137878  |
| CDA  | Chandran_metastasis_top    | SKCM | -0.480785163 |
| CDA  | Citrate cycle (tca cycle)  | SKCM | -0.126256698 |
| CDA  | Cysteine and methionine r  | SKCM | -0.293954939 |
| CDA  | Cytokine induced killer cæ | SKCM | 0.012595952  |
| CDA  | D-arginine and d-ornithin  | SKCM | -0.080720841 |
| CDA  | D-glutamine and d-glutan   | SKCM | -0.201919803 |
| CDA  | Dendritic cell             | SKCM | 0.178396973  |
| CDA  | Dna_repair                 | SKCM | -0.201592659 |

|     |                              |      |              |
|-----|------------------------------|------|--------------|
| CDA | Dna_replication              | SKCM | -0.385689005 |
| CDA | Double-negative memory       | SKCM | 0.002032689  |
| CDA | Drug metabolism - cytoch     | SKCM | 0.549796572  |
| CDA | Drug metabolism - other      | SKCM | 0.424549293  |
| CDA | E2f_targets                  | SKCM | -0.531094661 |
| CDA | Ecm_receptor_interaction     | SKCM | 0.346335763  |
| CDA | Effector cd4+ memory t (     | SKCM | -0.045447079 |
| CDA | Effector cd8+ memory t (     | SKCM | 0.138699284  |
| CDA | Effector memory t cell       | SKCM | -0.003562067 |
| CDA | Effector regulatory t (treg  | SKCM | -0.161851588 |
| CDA | Elvidge_hif1a_targets_up     | SKCM | -0.267685052 |
| CDA | Endothelial cell             | SKCM | 0.078749506  |
| CDA | Eosinophil                   | SKCM | 0.252322398  |
| CDA | Ether lipid metabolism       | SKCM | 0.724314199  |
| CDA | Exhausted cd4+ t cell        | SKCM | -0.189426208 |
| CDA | Exhausted cd8+ t cell        | SKCM | -0.042940234 |
| CDA | Exhausted t cell             | SKCM | 0.022668736  |
| CDA | Fat cell (adipocyte)         | SKCM | 0.236112897  |
| CDA | Fatty acid biosynthesis      | SKCM | -0.123631486 |
| CDA | Fatty acid degradation       | SKCM | 0.16214335   |
| CDA | Fatty acid elongation        | SKCM | 0.374624559  |
| CDA | Fibroblast                   | SKCM | 0.156414054  |
| CDA | Folate biosynthesis          | SKCM | 0.16772035   |
| CDA | Follicular b cell            | SKCM | 0.185859755  |
| CDA | Follicular dendritic cell    | SKCM | -0.196563779 |
| CDA | Follicular helper (tfh) t ce | SKCM | 0.016309583  |
| CDA | Follicular t cell            | SKCM | 0.062579201  |
| CDA | Foxp3+il-17+ t cell          | SKCM | 0.208304244  |
| CDA | Fructose and mannose me      | SKCM | 0.301930663  |
| CDA | G2m_checkpoint               | SKCM | -0.441645375 |
| CDA | Galactose metabolism         | SKCM | 0.287966178  |
| CDA | Galie_tumor_stemness_ge      | SKCM | 0.395092667  |
| CDA | Glutathione metabolism       | SKCM | 0.390273769  |
| CDA | Glycerolipid metabolism      | SKCM | 0.429589971  |
| CDA | Glycerophospholipid metæ     | SKCM | 0.484842798  |
| CDA | Glycine, serine and threor   | SKCM | 0.208542062  |
| CDA | Glycolysis / gluconeogene    | SKCM | 0.212761249  |
| CDA | Glycosaminoglycan biosy      | SKCM | 0.187538608  |
| CDA | Glycosaminoglycan biosy      | SKCM | 0.211657198  |
| CDA | Glycosaminoglycan biosy      | SKCM | 0.060724637  |
| CDA | Glycosaminoglycan degra      | SKCM | 0.35522914   |
| CDA | Glycosphingolipid biosyn     | SKCM | 0.014130953  |
| CDA | Glycosphingolipid biosyn     | SKCM | 0.306433048  |

|     |                           |      |              |
|-----|---------------------------|------|--------------|
| CDA | Glycosphingolipid biosyn  | SKCM | 0.635610665  |
| CDA | Glycosylphosphatidylinos  | SKCM | -0.078821442 |
| CDA | Glyoxylate and dicarboxy  | SKCM | -0.10683499  |
| CDA | Granulocyte               | SKCM | -0.085839877 |
| CDA | Hedgehog_signaling        | SKCM | 0.095028589  |
| CDA | Histidine metabolism      | SKCM | 0.584478346  |
| CDA | Hypoxia                   | SKCM | 0.461827229  |
| CDA | Il-17ralpha t cell        | SKCM | 0.078864654  |
| CDA | Il2_stat5_signaling       | SKCM | 0.3477627    |
| CDA | Il6_jak_stat3_signaling   | SKCM | 0.246943656  |
| CDA | Immune_checkpoints_tun    | SKCM | 0.100262089  |
| CDA | Immune_inhibition_cytok   | SKCM | 0.420731818  |
| CDA | Inositol phosphate metabo | SKCM | -0.199876539 |
| CDA | Interleukin_6_signaling   | SKCM | -0.199774316 |
| CDA | Jaeger_metastasis_up      | SKCM | -0.386363432 |
| CDA | Jain_nfkb_signaling       | SKCM | -0.301001822 |
| CDA | Kras_signaling_up         | SKCM | 0.374999545  |
| CDA | Linoleic acid metabolism  | SKCM | 0.808072857  |
| CDA | Lipoic acid metabolism    | SKCM | -0.224537348 |
| CDA | Lysine degradation        | SKCM | -0.170692812 |
| CDA | Lysosome                  | SKCM | 0.113192854  |
| CDA | M1 macrophage             | SKCM | 0.042110852  |
| CDA | M2 macrophage             | SKCM | 0.300707198  |
| CDA | Mannose type o-glycan bi  | SKCM | -0.111806174 |
| CDA | Mapk_signaling_pathway    | SKCM | 0.258416587  |
| CDA | Mapk3_erk1_activation     | SKCM | -0.227622183 |
| CDA | Marginal zone b cell      | SKCM | -0.152483929 |
| CDA | Memory b cell             | SKCM | -0.147140221 |
| CDA | Mesenchymal cell          | SKCM | 0.212470585  |
| CDA | Mesenchymal stem cell     | SKCM | 0.213733872  |
| CDA | Metabolism of xenobiotic  | SKCM | 0.50582322   |
| CDA | Migrating cancer stem cel | SKCM | 0.475265781  |
| CDA | Mitotic_spindle           | SKCM | -0.339408987 |
| CDA | Monocyte                  | SKCM | 0.344020664  |
| CDA | Mtor_signaling_pathway    | SKCM | -0.024024504 |
| CDA | Mtorc1_signaling          | SKCM | -0.106640964 |
| CDA | Mucin type o-glycan bios  | SKCM | 0.028918518  |
| CDA | Myc_targets_v1            | SKCM | -0.284173947 |
| CDA | Myeloid cell              | SKCM | 0.091067423  |
| CDA | N-glycan biosynthesis     | SKCM | -0.151840896 |
| CDA | Naive b cell              | SKCM | 0.596174259  |
| CDA | Naive cd4+ t cell         | SKCM | 0.225019498  |
| CDA | Naive cd8+ t cell         | SKCM | 0.191223019  |

|     |                             |      |              |
|-----|-----------------------------|------|--------------|
| CDA | Natural killer cell         | SKCM | 0.040189005  |
| CDA | Natural killer t (nkt) cell | SKCM | -0.507063203 |
| CDA | Natural regulatory t (treg) | SKCM | 0.028729212  |
| CDA | Neomycin, kanamycin and     | SKCM | 0.170069719  |
| CDA | Neutrophil                  | SKCM | 0.676404627  |
| CDA | Nicotinate and nicotinami   | SKCM | 0.206322016  |
| CDA | Nitrogen metabolism         | SKCM | 0.390407148  |
| CDA | Nod_like_receptor_signal    | SKCM | 0.263904873  |
| CDA | Notch_signaling             | SKCM | 0.458550489  |
| CDA | One carbon pool by folate   | SKCM | -0.420172719 |
| CDA | Other glycan degradation    | SKCM | 0.056411771  |
| CDA | Other types of o-glycan b   | SKCM | -0.172042976 |
| CDA | Oxidative phosphorylatio    | SKCM | 0.098233284  |
| CDA | P53_pathway                 | SKCM | 0.722412507  |
| CDA | P53_signaling_pathway       | SKCM | 0.183252224  |
| CDA | Pantothenate and coa bios   | SKCM | -0.020613459 |
| CDA | Pentose and glucuronate i   | SKCM | 0.218507111  |
| CDA | Pentose phosphate pathwa    | SKCM | 0.194211833  |
| CDA | Pericyte                    | SKCM | 0.159517259  |
| CDA | Phenylalanine metabolism    | SKCM | 0.427147467  |
| CDA | Phenylalanine, tyrosine ar  | SKCM | 0.035691855  |
| CDA | Phosphonate and phosphir    | SKCM | -0.039075818 |
| CDA | Pi3k_akt_activation         | SKCM | -0.024637267 |
| CDA | Pi3k_akt_mtor_signaling     | SKCM | 0.056130744  |
| CDA | Porphyrin and chlorophyl    | SKCM | 0.170212817  |
| CDA | Primary bile acid biosynt   | SKCM | 0.337648681  |
| CDA | Propanoate metabolism       | SKCM | -0.233124257 |
| CDA | Purine metabolism           | SKCM | -0.09418368  |
| CDA | Pyrimidine metabolism       | SKCM | -0.199280571 |
| CDA | Pyruvate metabolism         | SKCM | 0.022896691  |
| CDA | Regulation_of_autophagy     | SKCM | -0.278515223 |
| CDA | Retinol metabolism          | SKCM | 0.664579138  |
| CDA | Riboflavin metabolism       | SKCM | -0.030619819 |
| CDA | Schmahl_pdgf_signaling      | SKCM | 0.05204333   |
| CDA | Selenocompound metabol      | SKCM | -0.371560311 |
| CDA | Signaling_by_hippo          | SKCM | -0.246244029 |
| CDA | Sphingolipid metabolism     | SKCM | 0.513800449  |
| CDA | Starch and sucrose metabo   | SKCM | 0.011218787  |
| CDA | Steroid biosynthesis        | SKCM | 0.453169438  |
| CDA | Steroid hormone biosynth    | SKCM | 0.54125723   |
| CDA | Sulfur metabolism           | SKCM | 0.070037905  |
| CDA | Synthesis and degradation   | SKCM | 0.010437636  |
| CDA | T helper cell               | SKCM | 0.134774253  |



|      |                            |      |              |
|------|----------------------------|------|--------------|
| CDA  | T helper1 (th1) cell       | SKCM | 0.093922678  |
| CDA  | T helper17 (th17) cell     | SKCM | 0.230537579  |
| CDA  | T helper2 (th2) cell       | SKCM | 0.224350528  |
| CDA  | T helper9 (th9) cell       | SKCM | 0.226871908  |
| CDA  | Taurine and hypotaurine r  | SKCM | 0.121131621  |
| CDA  | Terpenoid backbone biosy   | SKCM | 0.02257631   |
| CDA  | Tgf_beta_signaling_pathw   | SKCM | -0.099953952 |
| CDA  | Thiamine metabolism        | SKCM | 0.016676135  |
| CDA  | Tnfa_signaling_via_nfkb    | SKCM | 0.367287623  |
| CDA  | Tryptophan metabolism      | SKCM | 0.213080864  |
| CDA  | Tumor endothelial cell     | SKCM | 0.849933058  |
| CDA  | Tyrosine metabolism        | SKCM | 0.437412854  |
| CDA  | Ubiquinone and other terf  | SKCM | -0.089937402 |
| CDA  | Valine, leucine and isoleu | SKCM | 0.161675041  |
| CDA  | Valine, leucine and isoleu | SKCM | -0.051045821 |
| CDA  | Vascular endothelial cell  | SKCM | 0.352764139  |
| CDA  | Vascular smooth muscle c   | SKCM | 0.283167961  |
| CDA  | Vegf_signaling_pathway     | SKCM | 0.464945206  |
| CDA  | Vitamin b6 metabolism      | SKCM | 0.184549787  |
| CDA  | Willert_wnt_signaling      | SKCM | 0.189849055  |
| CDA  | Wnt_beta_catenin_signali   | SKCM | 0.259100873  |
| UCK1 | Abnormal plasma cell       | SKCM | -0.292214224 |
| UCK1 | Activated b cell           | SKCM | -0.0559295   |
| UCK1 | Activated cd4+ t cell      | SKCM | -0.307093789 |
| UCK1 | Activated t cell           | SKCM | -0.080376735 |
| UCK1 | Alanine, aspartate and glu | SKCM | -0.115072021 |
| UCK1 | Alcala_apoptosis           | SKCM | 0.15856055   |
| UCK1 | Alpha-linolenic acid meta  | SKCM | 0.032085083  |
| UCK1 | Amino sugar and nucleoti   | SKCM | 0.073343999  |
| UCK1 | Ampk_pathway               | SKCM | 0.123748314  |
| UCK1 | Angiogenesis               | SKCM | -0.207246005 |
| UCK1 | Arachidonic acid metabol:  | SKCM | 0.110094659  |
| UCK1 | Arginine and proline metæ  | SKCM | 0.279626341  |
| UCK1 | Arginine biosynthesis      | SKCM | 0.227563031  |
| UCK1 | Ascorbate and aldarate mε  | SKCM | 0.259427847  |
| UCK1 | Atypical memory b cell     | SKCM | 0.067951072  |
| UCK1 | Axl+siglec6+ dendritic ce  | SKCM | -0.003947117 |
| UCK1 | B cell                     | SKCM | -0.267312424 |
| UCK1 | B1 cell                    | SKCM | 0.020904058  |
| UCK1 | Basal cell                 | SKCM | -0.02031705  |
| UCK1 | Beta-alanine metabolism    | SKCM | 0.074240747  |
| UCK1 | Biosynthesis of unsaturate | SKCM | 0.08224518   |
| UCK1 | Biotin metabolism          | SKCM | 0.04566795   |

|      |                             |      |              |
|------|-----------------------------|------|--------------|
| UCK1 | Butanoate metabolism        | SKCM | 0.181151442  |
| UCK1 | Caffeine metabolism         | SKCM | 0.238391337  |
| UCK1 | Cancer stem cell            | SKCM | -0.394992688 |
| UCK1 | Cancer stem-like cell       | SKCM | -0.190026227 |
| UCK1 | Cd4+ cytotoxic t cell       | SKCM | -0.096026887 |
| UCK1 | Cd4+ memory t cell          | SKCM | 0.030448635  |
| UCK1 | Cd4+ regulatory t cell      | SKCM | -0.090890455 |
| UCK1 | Cd4+ t helper cell          | SKCM | -0.102165278 |
| UCK1 | Cd4+cd25+ regulatory t c    | SKCM | -0.123279726 |
| UCK1 | Cd8+ cytotoxic t cell       | SKCM | -0.053759087 |
| UCK1 | Cd8+ regulatory t cell      | SKCM | -0.117357366 |
| UCK1 | Cell_cycle                  | SKCM | -0.215475222 |
| UCK1 | Chandran_metastasis_top5    | SKCM | -0.150421673 |
| UCK1 | Citrate cycle (tca cycle)   | SKCM | 0.194021341  |
| UCK1 | Cysteine and methionine r   | SKCM | 0.208653195  |
| UCK1 | Cytokine induced killer c   | SKCM | -0.14994858  |
| UCK1 | D-arginine and d-ornithin   | SKCM | -0.018039548 |
| UCK1 | D-glutamine and d-glutan    | SKCM | -0.266578591 |
| UCK1 | Dendritic cell              | SKCM | -0.125955239 |
| UCK1 | Dna_repair                  | SKCM | 0.373279778  |
| UCK1 | Dna_replication             | SKCM | 0.159645707  |
| UCK1 | Double-negative memory      | SKCM | 0.041014117  |
| UCK1 | Drug metabolism - cytoch    | SKCM | 0.405749417  |
| UCK1 | Drug metabolism - other     | SKCM | 0.45377554   |
| UCK1 | E2f_targets                 | SKCM | -0.136602566 |
| UCK1 | Ecm_receptor_interaction    | SKCM | -0.278412694 |
| UCK1 | Effector cd4+ memory t (    | SKCM | -0.210818338 |
| UCK1 | Effector cd8+ memory t (    | SKCM | -0.192374589 |
| UCK1 | Effector memory t cell      | SKCM | -0.139490462 |
| UCK1 | Effector regulatory t (treg | SKCM | -0.375483014 |
| UCK1 | Elvidge_hif1a_targets_up    | SKCM | -0.154519079 |
| UCK1 | Endothelial cell            | SKCM | -0.412069295 |
| UCK1 | Eosinophil                  | SKCM | -0.187427198 |
| UCK1 | Ether lipid metabolism      | SKCM | -0.103030379 |
| UCK1 | Exhausted cd4+ t cell       | SKCM | -0.349698748 |
| UCK1 | Exhausted cd8+ t cell       | SKCM | -0.250157997 |
| UCK1 | Exhausted t cell            | SKCM | -0.027704105 |
| UCK1 | Fat cell (adipocyte)        | SKCM | 0.334649897  |
| UCK1 | Fatty acid biosynthesis     | SKCM | -0.125198401 |
| UCK1 | Fatty acid degradation      | SKCM | 0.145271241  |
| UCK1 | Fatty acid elongation       | SKCM | 0.218788847  |
| UCK1 | Fibroblast                  | SKCM | -0.31546395  |
| UCK1 | Folate biosynthesis         | SKCM | 0.230020503  |

|      |                              |      |              |
|------|------------------------------|------|--------------|
| UCK1 | Follicular b cell            | SKCM | -0.171403021 |
| UCK1 | Follicular dendritic cell    | SKCM | -0.113476076 |
| UCK1 | Follicular helper (tfh) t ce | SKCM | -0.043464285 |
| UCK1 | Follicular t cell            | SKCM | 0.091717998  |
| UCK1 | Foxp3+il-17+ t cell          | SKCM | 0.17578139   |
| UCK1 | Fructose and mannose me      | SKCM | 0.328573461  |
| UCK1 | G2m_checkpoint               | SKCM | -0.204464484 |
| UCK1 | Galactose metabolism         | SKCM | 0.170012016  |
| UCK1 | Galie_tumor_stemness_ge      | SKCM | -0.120872893 |
| UCK1 | Glutathione metabolism       | SKCM | 0.34842036   |
| UCK1 | Glycerolipid metabolism      | SKCM | 0.31631139   |
| UCK1 | Glycerophospholipid metæ     | SKCM | 0.168574439  |
| UCK1 | Glycine, serine and threor   | SKCM | 0.374530349  |
| UCK1 | Glycolysis / gluconeogene    | SKCM | 0.31598044   |
| UCK1 | Glycosaminoglycan biosy      | SKCM | 0.061230124  |
| UCK1 | Glycosaminoglycan biosy      | SKCM | -0.112867178 |
| UCK1 | Glycosaminoglycan biosy      | SKCM | 0.022871415  |
| UCK1 | Glycosaminoglycan degra      | SKCM | 0.055081158  |
| UCK1 | Glycosphingolipid biosyn     | SKCM | -0.139448475 |
| UCK1 | Glycosphingolipid biosyn     | SKCM | 0.272183342  |
| UCK1 | Glycosphingolipid biosyn     | SKCM | 0.096557123  |
| UCK1 | Glycosylphosphatidylinos     | SKCM | -0.029031971 |
| UCK1 | Glyoxylate and dicarboxy     | SKCM | 0.233226485  |
| UCK1 | Granulocyte                  | SKCM | -0.276681871 |
| UCK1 | Hedgehog_signaling           | SKCM | -0.101360574 |
| UCK1 | Histidine metabolism         | SKCM | 0.078972363  |
| UCK1 | Hypoxia                      | SKCM | 0.072348012  |
| UCK1 | Il-17alpha t cell            | SKCM | -0.024495838 |
| UCK1 | Il2_stat5_signaling          | SKCM | -0.134382546 |
| UCK1 | Il6_jak_stat3_signaling      | SKCM | -0.187767955 |
| UCK1 | Immune_checkpoints_tun       | SKCM | -0.123461921 |
| UCK1 | Immune_inhibition_cytok      | SKCM | -0.070869513 |
| UCK1 | Inositol phosphate metabo    | SKCM | -0.355335585 |
| UCK1 | Interleukin_6_signaling      | SKCM | -0.430425071 |
| UCK1 | Jaeger_metastasis_up         | SKCM | -0.145088088 |
| UCK1 | Jain_nfkb_signaling          | SKCM | -0.154097947 |
| UCK1 | Kras_signaling_up            | SKCM | -0.351569076 |
| UCK1 | Linoleic acid metabolism     | SKCM | 0.100278556  |
| UCK1 | Lipoic acid metabolism       | SKCM | -0.083328255 |
| UCK1 | Lysine degradation           | SKCM | 0.138979943  |
| UCK1 | Lysosome                     | SKCM | 0.068691507  |
| UCK1 | M1 macrophage                | SKCM | -0.250806685 |
| UCK1 | M2 macrophage                | SKCM | -0.257994738 |

|      |                             |      |              |
|------|-----------------------------|------|--------------|
| UCK1 | Mannose type o-glycan bi    | SKCM | 0.256360415  |
| UCK1 | Mapk_signaling_pathway      | SKCM | -0.141122119 |
| UCK1 | Mapk3_erk1_activation       | SKCM | -0.36717798  |
| UCK1 | Marginal zone b cell        | SKCM | -0.30957039  |
| UCK1 | Memory b cell               | SKCM | -0.231190765 |
| UCK1 | Mesenchymal cell            | SKCM | -0.073017067 |
| UCK1 | Mesenchymal stem cell       | SKCM | -0.448439431 |
| UCK1 | Metabolism of xenobiotic    | SKCM | 0.468784735  |
| UCK1 | Migrating cancer stem cel   | SKCM | -0.187828263 |
| UCK1 | Mitotic_spindle             | SKCM | -0.246843263 |
| UCK1 | Monocyte                    | SKCM | -0.178787374 |
| UCK1 | Mtor_signaling_pathway      | SKCM | -0.095176208 |
| UCK1 | Mtorc1_signaling            | SKCM | -0.165532965 |
| UCK1 | Mucin type o-glycan bios    | SKCM | -0.212650738 |
| UCK1 | Myc_targets_v1              | SKCM | 0.031281665  |
| UCK1 | Myeloid cell                | SKCM | -0.248808203 |
| UCK1 | N-glycan biosynthesis       | SKCM | 0.083207829  |
| UCK1 | Naive b cell                | SKCM | -0.142292902 |
| UCK1 | Naive cd4+ t cell           | SKCM | -0.231582395 |
| UCK1 | Naive cd8+ t cell           | SKCM | -0.36247035  |
| UCK1 | Natural killer cell         | SKCM | -0.099483794 |
| UCK1 | Natural killer t (nkt) cell | SKCM | -0.335646995 |
| UCK1 | Natural regulatory t (treg) | SKCM | -0.170396614 |
| UCK1 | Neomycin, kanamycin and     | SKCM | -0.064496642 |
| UCK1 | Neutrophil                  | SKCM | -0.157510279 |
| UCK1 | Nicotinate and nicotinami   | SKCM | 0.078908445  |
| UCK1 | Nitrogen metabolism         | SKCM | -0.13619474  |
| UCK1 | Nod_like_receptor_signal    | SKCM | -0.359497574 |
| UCK1 | Notch_signaling             | SKCM | 0.067664843  |
| UCK1 | One carbon pool by folate   | SKCM | -0.060344964 |
| UCK1 | Other glycan degradation    | SKCM | 0.089458443  |
| UCK1 | Other types of o-glycan b   | SKCM | 0.191872711  |
| UCK1 | Oxidative phosphorylatio    | SKCM | 0.470510245  |
| UCK1 | P53_pathway                 | SKCM | 0.021208598  |
| UCK1 | P53_signaling_pathway       | SKCM | -0.431821512 |
| UCK1 | Pantothenate and coa bios   | SKCM | -0.014898049 |
| UCK1 | Pentose and glucuronate i   | SKCM | 0.183740691  |
| UCK1 | Pentose phosphate pathwa    | SKCM | 0.438339312  |
| UCK1 | Pericyte                    | SKCM | -0.274384325 |
| UCK1 | Phenylalanine metabolism    | SKCM | 0.383364237  |
| UCK1 | Phenylalanine, tyrosine ar  | SKCM | 0.372549226  |
| UCK1 | Phosphonate and phosphir    | SKCM | 0.047901996  |
| UCK1 | Pi3k_akt_activation         | SKCM | -0.142583434 |

|      |                            |      |              |
|------|----------------------------|------|--------------|
| UCK1 | Pi3k_akt_mtor_signaling    | SKCM | -0.018744858 |
| UCK1 | Porphyrin and chlorophyl   | SKCM | 0.490372182  |
| UCK1 | Primary bile acid biosyntn | SKCM | 0.108696256  |
| UCK1 | Propanoate metabolism      | SKCM | -0.178496871 |
| UCK1 | Purine metabolism          | SKCM | 0.306791645  |
| UCK1 | Pyrimidine metabolism      | SKCM | 0.165055445  |
| UCK1 | Pyruvate metabolism        | SKCM | 0.176180138  |
| UCK1 | Regulation_of_autophagy    | SKCM | -0.268256395 |
| UCK1 | Retinol metabolism         | SKCM | 0.276047538  |
| UCK1 | Riboflavin metabolism      | SKCM | 0.415943247  |
| UCK1 | Schmahl_pdgf_signaling     | SKCM | -0.036435667 |
| UCK1 | Selenocompound metabol     | SKCM | 0.04936159   |
| UCK1 | Signaling_by_hippo         | SKCM | -0.280419919 |
| UCK1 | Sphingolipid metabolism    | SKCM | 0.084997274  |
| UCK1 | Starch and sucrose metabo  | SKCM | -0.08327508  |
| UCK1 | Steroid biosynthesis       | SKCM | 0.124828803  |
| UCK1 | Steroid hormone biosynth   | SKCM | 0.308495479  |
| UCK1 | Sulfur metabolism          | SKCM | -0.045736825 |
| UCK1 | Synthesis and degradation  | SKCM | 0.049061232  |
| UCK1 | T helper cell              | SKCM | -0.092165702 |
| UCK1 | T helper1 (th1) cell       | SKCM | -0.120886823 |
| UCK1 | T helper17 (th17) cell     | SKCM | -0.164141085 |
| UCK1 | T helper2 (th2) cell       | SKCM | -0.074271827 |
| UCK1 | T helper9 (th9) cell       | SKCM | -0.015916388 |
| UCK1 | Taurine and hypotaurine r  | SKCM | 0.156605305  |
| UCK1 | Terpenoid backbone biosy   | SKCM | -0.03772352  |
| UCK1 | Tgf_beta_signaling_pathw   | SKCM | -0.268991781 |
| UCK1 | Thiamine metabolism        | SKCM | 0.506536824  |
| UCK1 | Tnfa_signaling_via_nfkb    | SKCM | -0.214056229 |
| UCK1 | Tryptophan metabolism      | SKCM | 0.270501259  |
| UCK1 | Tumor endothelial cell     | SKCM | 0.008133705  |
| UCK1 | Tyrosine metabolism        | SKCM | 0.492200136  |
| UCK1 | Ubiquinone and other terp  | SKCM | 0.255253198  |
| UCK1 | Valine, leucine and isoleu | SKCM | 0.328435606  |
| UCK1 | Valine, leucine and isoleu | SKCM | 0.104197825  |
| UCK1 | Vascular endothelial cell  | SKCM | 0.182529199  |
| UCK1 | Vascular smooth muscle c   | SKCM | 0.19483503   |
| UCK1 | Vegf_signaling_pathway     | SKCM | -0.038821355 |
| UCK1 | Vitamin b6 metabolism      | SKCM | 0.316551656  |
| UCK1 | Willert_wnt_signaling      | SKCM | -0.186747408 |
| UCK1 | Wnt_beta_catenin_signali   | SKCM | 0.241306386  |
| UCK2 | Abnormal plasma cell       | SKCM | -0.086203576 |
| UCK2 | Activated b cell           | SKCM | -0.115577164 |

|      |                                      |      |              |
|------|--------------------------------------|------|--------------|
| UCK2 | Activated cd4+ t cell                | SKCM | -0.160517785 |
| UCK2 | Activated t cell                     | SKCM | -0.157593113 |
| UCK2 | Alanine, aspartate and glu           | SKCM | 0.042701894  |
| UCK2 | Alcala_apoptosis                     | SKCM | -0.123466229 |
| UCK2 | Alpha-linolenic acid meta            | SKCM | -0.236364476 |
| UCK2 | Amino sugar and nucleoti             | SKCM | 0.097152858  |
| UCK2 | Ampk_pathway                         | SKCM | 0.086392119  |
| UCK2 | Angiogenesis                         | SKCM | 0.045986504  |
| UCK2 | Arachidonic acid metabol:            | SKCM | -0.183716767 |
| UCK2 | Arginine and proline metæ            | SKCM | 0.047141823  |
| UCK2 | Arginine biosynthesis                | SKCM | 0.113011312  |
| UCK2 | Ascorbate and aldarate mε            | SKCM | 0.042665523  |
| UCK2 | Atypical memory b cell               | SKCM | -0.036728454 |
| UCK2 | Axl+siglec6+ dendritic ce            | SKCM | -0.238020223 |
| UCK2 | B cell                               | SKCM | -0.157740833 |
| UCK2 | B1 cell                              | SKCM | -0.199276173 |
| UCK2 | Basal cell                           | SKCM | -0.148389843 |
| UCK2 | Beta-alanine metabolism              | SKCM | -0.078516161 |
| UCK2 | Biosynthesis of unsaturate           | SKCM | -0.06136167  |
| UCK2 | Biotin metabolism                    | SKCM | 0.051518168  |
| UCK2 | Butanoate metabolism                 | SKCM | 0.067678339  |
| UCK2 | Caffeine metabolism                  | SKCM | 0.054003448  |
| UCK2 | Cancer stem cell                     | SKCM | -0.176773462 |
| UCK2 | Cancer stem-like cell                | SKCM | 0.000259056  |
| UCK2 | Cd4+ cytotoxic t cell                | SKCM | -0.196564272 |
| UCK2 | Cd4+ memory t cell                   | SKCM | -0.14702999  |
| UCK2 | Cd4+ regulatory t cell               | SKCM | -0.129861282 |
| UCK2 | Cd4+ t helper cell                   | SKCM | -0.204325151 |
| UCK2 | Cd4+cd25+ regulatory t c             | SKCM | -0.205717644 |
| UCK2 | Cd8+ cytotoxic t cell                | SKCM | -0.229923491 |
| UCK2 | Cd8+ regulatory t cell               | SKCM | -0.170454695 |
| UCK2 | Cell_cycle                           | SKCM | 0.159970608  |
| UCK2 | Chandran_metastasis_top <sup>5</sup> | SKCM | 0.233142642  |
| UCK2 | Citrate cycle (tca cycle)            | SKCM | 0.197228177  |
| UCK2 | Cysteine and methionine r            | SKCM | 0.301194158  |
| UCK2 | Cytokine induced killer cε           | SKCM | -0.226847431 |
| UCK2 | D-arginine and d-ornithin            | SKCM | 0.016619296  |
| UCK2 | D-glutamine and d-glutan             | SKCM | -0.005260917 |
| UCK2 | Dendritic cell                       | SKCM | -0.123489196 |
| UCK2 | Dna_repair                           | SKCM | 0.021012174  |
| UCK2 | Dna_replication                      | SKCM | 0.204549585  |
| UCK2 | Double-negative memory               | SKCM | -0.141352571 |
| UCK2 | Drug metabolism - cytoch             | SKCM | 0.020121909  |

|      |                                   |              |
|------|-----------------------------------|--------------|
| UCK2 | Drug metabolism - other (SKCM     | 0.174646161  |
| UCK2 | E2f_targets SKCM                  | 0.246397559  |
| UCK2 | Ecm_receptor_interaction SKCM     | -0.102184819 |
| UCK2 | Effector cd4+ memory t ( SKCM     | -0.204831947 |
| UCK2 | Effector cd8+ memory t ( SKCM     | -0.174819245 |
| UCK2 | Effector memory t cell SKCM       | -0.160257038 |
| UCK2 | Effector regulatory t (treg SKCM  | -0.042941614 |
| UCK2 | Elvidge_hif1a_targets_up SKCM     | 0.077372179  |
| UCK2 | Endothelial cell SKCM             | 0.009045878  |
| UCK2 | Eosinophil SKCM                   | -0.151482088 |
| UCK2 | Ether lipid metabolism SKCM       | -0.202528259 |
| UCK2 | Exhausted cd4+ t cell SKCM        | -0.253790986 |
| UCK2 | Exhausted cd8+ t cell SKCM        | -0.295124054 |
| UCK2 | Exhausted t cell SKCM             | -0.191104381 |
| UCK2 | Fat cell (adipocyte) SKCM         | 0.139060375  |
| UCK2 | Fatty acid biosynthesis SKCM      | 0.092026344  |
| UCK2 | Fatty acid degradation SKCM       | 0.057922685  |
| UCK2 | Fatty acid elongation SKCM        | -0.040888315 |
| UCK2 | Fibroblast SKCM                   | -0.048910043 |
| UCK2 | Folate biosynthesis SKCM          | -0.010209714 |
| UCK2 | Follicular b cell SKCM            | -0.207784721 |
| UCK2 | Follicular dendritic cell SKCM    | 0.067055825  |
| UCK2 | Follicular helper (tfh) t ce SKCM | -0.192340079 |
| UCK2 | Follicular t cell SKCM            | -0.23538407  |
| UCK2 | Foxp3+il-17+ t cell SKCM          | -0.154810566 |
| UCK2 | Fructose and mannose me SKCM      | 0.087855579  |
| UCK2 | G2m_checkpoint SKCM               | 0.232506289  |
| UCK2 | Galactose metabolism SKCM         | 0.067947704  |
| UCK2 | Galie_tumor_stemness_ge SKCM      | -0.260687398 |
| UCK2 | Glutathione metabolism SKCM       | 0.096658892  |
| UCK2 | Glycerolipid metabolism SKCM      | 0.091008862  |
| UCK2 | Glycerophospholipid metæ SKCM     | -0.073591134 |
| UCK2 | Glycine, serine and threor SKCM   | 0.076121552  |
| UCK2 | Glycolysis / gluconeogene SKCM    | 0.121357496  |
| UCK2 | Glycosaminoglycan biosy1 SKCM     | -0.04065183  |
| UCK2 | Glycosaminoglycan biosy1 SKCM     | -0.076783177 |
| UCK2 | Glycosaminoglycan biosy1 SKCM     | -0.071546502 |
| UCK2 | Glycosaminoglycan degra SKCM      | -0.007716073 |
| UCK2 | Glycosphingolipid biosyn1 SKCM    | -0.061366518 |
| UCK2 | Glycosphingolipid biosyn1 SKCM    | 0.129530527  |
| UCK2 | Glycosphingolipid biosyn1 SKCM    | 0.042795851  |
| UCK2 | Glycosylphosphatidylinos: SKCM    | -0.045932348 |
| UCK2 | Glyoxylate and dicarboxy SKCM     | 0.08682144   |

|      |                             |      |              |
|------|-----------------------------|------|--------------|
| UCK2 | Granulocyte                 | SKCM | -0.114443332 |
| UCK2 | Hedgehog_signaling          | SKCM | -0.108726171 |
| UCK2 | Histidine metabolism        | SKCM | -0.150235711 |
| UCK2 | Hypoxia                     | SKCM | 0.01622938   |
| UCK2 | Il-17alpha t cell           | SKCM | -0.20793903  |
| UCK2 | Il2_stat5_signaling         | SKCM | -0.168456283 |
| UCK2 | Il6_jak_stat3_signaling     | SKCM | -0.21276455  |
| UCK2 | Immune_checkpoints_tun      | SKCM | -0.329666047 |
| UCK2 | Immune_inhibition_cytok     | SKCM | -0.232118182 |
| UCK2 | Inositol phosphate metabo   | SKCM | -0.046339245 |
| UCK2 | Interleukin_6_signaling     | SKCM | -0.051697471 |
| UCK2 | Jaeger_metastasis_up        | SKCM | 0.288068985  |
| UCK2 | Jain_nfkb_signaling         | SKCM | 0.224697673  |
| UCK2 | Kras_signaling_up           | SKCM | -0.194126483 |
| UCK2 | Linoleic acid metabolism    | SKCM | -0.164564442 |
| UCK2 | Lipoic acid metabolism      | SKCM | 0.036438147  |
| UCK2 | Lysine degradation          | SKCM | 0.133755034  |
| UCK2 | Lysosome                    | SKCM | -0.091383284 |
| UCK2 | M1 macrophage               | SKCM | -0.1474227   |
| UCK2 | M2 macrophage               | SKCM | -0.103337261 |
| UCK2 | Mannose type o-glycan bi    | SKCM | 0.100846959  |
| UCK2 | Mapk_signaling_pathway      | SKCM | -0.108829797 |
| UCK2 | Mapk3_erk1_activation       | SKCM | -0.030004581 |
| UCK2 | Marginal zone b cell        | SKCM | -0.18282555  |
| UCK2 | Memory b cell               | SKCM | -0.115984704 |
| UCK2 | Mesenchymal cell            | SKCM | 0.131967653  |
| UCK2 | Mesenchymal stem cell       | SKCM | -0.195284143 |
| UCK2 | Metabolism of xenobiotic    | SKCM | 0.047554651  |
| UCK2 | Migrating cancer stem cel   | SKCM | -0.166343237 |
| UCK2 | Mitotic_spindle             | SKCM | 0.074214506  |
| UCK2 | Monocyte                    | SKCM | -0.219891785 |
| UCK2 | Mtor_signaling_pathway      | SKCM | 0.127169492  |
| UCK2 | Mtorc1_signaling            | SKCM | 0.151089665  |
| UCK2 | Mucin type o-glycan bios    | SKCM | 0.074344621  |
| UCK2 | Myc_targets_v1              | SKCM | 0.268334284  |
| UCK2 | Myeloid cell                | SKCM | -0.186589165 |
| UCK2 | N-glycan biosynthesis       | SKCM | 0.209498853  |
| UCK2 | Naive b cell                | SKCM | -0.222518018 |
| UCK2 | Naive cd4+ t cell           | SKCM | -0.145424381 |
| UCK2 | Naive cd8+ t cell           | SKCM | -0.20958199  |
| UCK2 | Natural killer cell         | SKCM | -0.197834662 |
| UCK2 | Natural killer t (nkt) cell | SKCM | -0.130419512 |
| UCK2 | Natural regulatory t (treg) | SKCM | -0.176134702 |



|      |                            |      |              |
|------|----------------------------|------|--------------|
| UCK2 | Neomycin, kanamycin and    | SKCM | 0.063366079  |
| UCK2 | Neutrophil                 | SKCM | -0.172773951 |
| UCK2 | Nicotinate and nicotinami  | SKCM | -0.082570591 |
| UCK2 | Nitrogen metabolism        | SKCM | -0.036914509 |
| UCK2 | Nod_like_receptor_signal   | SKCM | -0.294187947 |
| UCK2 | Notch_signaling            | SKCM | -0.030531928 |
| UCK2 | One carbon pool by folate  | SKCM | 0.215685756  |
| UCK2 | Other glycan degradation   | SKCM | -0.040249127 |
| UCK2 | Other types of o-glycan b  | SKCM | 0.147337282  |
| UCK2 | Oxidative phosphorylatio   | SKCM | 0.077124835  |
| UCK2 | P53_pathway                | SKCM | -0.162911312 |
| UCK2 | P53_signaling_pathway      | SKCM | 0.041832643  |
| UCK2 | Pantothenate and coa bios  | SKCM | 0.051006837  |
| UCK2 | Pentose and glucuronate in | SKCM | 0.084811067  |
| UCK2 | Pentose phosphate pathwa   | SKCM | 0.11225005   |
| UCK2 | Pericyte                   | SKCM | -0.145895157 |
| UCK2 | Phenylalanine metabolism   | SKCM | 0.004563539  |
| UCK2 | Phenylalanine, tyrosine ar | SKCM | 0.003746411  |
| UCK2 | Phosphonate and phosphir   | SKCM | -0.051853119 |
| UCK2 | Pi3k_akt_activation        | SKCM | 0.14536675   |
| UCK2 | Pi3k_akt_mtor_signaling    | SKCM | -0.057149201 |
| UCK2 | Porphyrin and chlorophyl   | SKCM | 0.113994341  |
| UCK2 | Primary bile acid biosynt  | SKCM | -0.060664894 |
| UCK2 | Propanoate metabolism      | SKCM | 0.01569431   |
| UCK2 | Purine metabolism          | SKCM | 0.426692098  |
| UCK2 | Pyrimidine metabolism      | SKCM | 0.309635178  |
| UCK2 | Pyruvate metabolism        | SKCM | 0.121920801  |
| UCK2 | Regulation_of_autophagy    | SKCM | -0.252380561 |
| UCK2 | Retinol metabolism         | SKCM | -0.017208252 |
| UCK2 | Riboflavin metabolism      | SKCM | 0.058538402  |
| UCK2 | Schmahl_pdgf_signaling     | SKCM | -0.149229776 |
| UCK2 | Selenocompound metabol     | SKCM | 0.195602433  |
| UCK2 | Signaling_by_hippo         | SKCM | -0.007567407 |
| UCK2 | Sphingolipid metabolism    | SKCM | -0.000401951 |
| UCK2 | Starch and sucrose metabo  | SKCM | 0.023477606  |
| UCK2 | Steroid biosynthesis       | SKCM | 0.073403072  |
| UCK2 | Steroid hormone biosynth   | SKCM | 0.015348746  |
| UCK2 | Sulfur metabolism          | SKCM | -0.104379521 |
| UCK2 | Synthesis and degradation  | SKCM | 0.108811688  |
| UCK2 | T helper cell              | SKCM | -0.197154324 |
| UCK2 | T helper1 (th1) cell       | SKCM | -0.217991176 |
| UCK2 | T helper17 (th17) cell     | SKCM | -0.215448836 |
| UCK2 | T helper2 (th2) cell       | SKCM | -0.217816422 |

|       |                            |      |              |
|-------|----------------------------|------|--------------|
| UCK2  | T helper9 (th9) cell       | SKCM | -0.234892455 |
| UCK2  | Taurine and hypotaurine r  | SKCM | -2.78E-05    |
| UCK2  | Terpenoid backbone biosy   | SKCM | 0.06406484   |
| UCK2  | Tgf_beta_signaling_pathw   | SKCM | 0.024244483  |
| UCK2  | Thiamine metabolism        | SKCM | 0.061507732  |
| UCK2  | Tnfa_signaling_via_nfkb    | SKCM | -0.237710443 |
| UCK2  | Tryptophan metabolism      | SKCM | -0.074512639 |
| UCK2  | Tumor endothelial cell     | SKCM | -0.131770508 |
| UCK2  | Tyrosine metabolism        | SKCM | 0.037950813  |
| UCK2  | Ubiquinone and other terp  | SKCM | 0.113472596  |
| UCK2  | Valine, leucine and isoleu | SKCM | 0.096337961  |
| UCK2  | Valine, leucine and isoleu | SKCM | 0.033245202  |
| UCK2  | Vascular endothelial cell  | SKCM | 0.079300655  |
| UCK2  | Vascular smooth muscle c   | SKCM | 0.156727317  |
| UCK2  | Vegf_signaling_pathway     | SKCM | -0.130885419 |
| UCK2  | Vitamin b6 metabolism      | SKCM | -0.03719909  |
| UCK2  | Willert_wnt_signaling      | SKCM | -0.179201503 |
| UCK2  | Wnt_beta_catenin_signali   | SKCM | 0.032098458  |
| UCKL1 | Abnormal plasma cell       | SKCM | -0.028577374 |
| UCKL1 | Activated b cell           | SKCM | -0.111248395 |
| UCKL1 | Activated cd4+ t cell      | SKCM | -0.084845023 |
| UCKL1 | Activated t cell           | SKCM | -0.061848449 |
| UCKL1 | Alanine, aspartate and glu | SKCM | -0.041745956 |
| UCKL1 | Alcala_apoptosis           | SKCM | -0.155806673 |
| UCKL1 | Alpha-linolenic acid meta  | SKCM | -0.073370477 |
| UCKL1 | Amino sugar and nucleoti   | SKCM | -0.161686793 |
| UCKL1 | Ampk_pathway               | SKCM | 0.250337395  |
| UCKL1 | Angiogenesis               | SKCM | -0.278994561 |
| UCKL1 | Arachidonic acid metabol:  | SKCM | -0.075599791 |
| UCKL1 | Arginine and proline meta  | SKCM | -0.193707212 |
| UCKL1 | Arginine biosynthesis      | SKCM | -0.102062366 |
| UCKL1 | Ascorbate and aldarate me  | SKCM | -0.189083224 |
| UCKL1 | Atypical memory b cell     | SKCM | -0.094263033 |
| UCKL1 | Axl+siglec6+ dendritic ce  | SKCM | -0.126239673 |
| UCKL1 | B cell                     | SKCM | -0.166606816 |
| UCKL1 | B1 cell                    | SKCM | -0.096565832 |
| UCKL1 | Basal cell                 | SKCM | -0.09131387  |
| UCKL1 | Beta-alanine metabolism    | SKCM | -0.184595167 |
| UCKL1 | Biosynthesis of unsaturate | SKCM | -0.258498869 |
| UCKL1 | Biotin metabolism          | SKCM | -0.029605122 |
| UCKL1 | Butanoate metabolism       | SKCM | -0.202882044 |
| UCKL1 | Caffeine metabolism        | SKCM | -0.136974455 |
| UCKL1 | Cancer stem cell           | SKCM | -0.213171293 |

|       |                              |      |              |
|-------|------------------------------|------|--------------|
| UCKL1 | Cancer stem-like cell        | SKCM | -0.209406323 |
| UCKL1 | Cd4+ cytotoxic t cell        | SKCM | -0.056575402 |
| UCKL1 | Cd4+ memory t cell           | SKCM | -0.038413765 |
| UCKL1 | Cd4+ regulatory t cell       | SKCM | -0.104416194 |
| UCKL1 | Cd4+ t helper cell           | SKCM | -0.085574412 |
| UCKL1 | Cd4+cd25+ regulatory t c     | SKCM | -0.088384677 |
| UCKL1 | Cd8+ cytotoxic t cell        | SKCM | -0.067003109 |
| UCKL1 | Cd8+ regulatory t cell       | SKCM | -0.031989494 |
| UCKL1 | Cell_cycle                   | SKCM | 0.053808288  |
| UCKL1 | Chandran_metastasis_top5     | SKCM | 0.003011869  |
| UCKL1 | Citrate cycle (tca cycle)    | SKCM | -0.037589773 |
| UCKL1 | Cysteine and methionine r    | SKCM | -0.065895483 |
| UCKL1 | Cytokine induced killer c    | SKCM | -0.029413149 |
| UCKL1 | D-arginine and d-ornithin    | SKCM | -0.08910923  |
| UCKL1 | D-glutamine and d-glutan     | SKCM | 0.040022211  |
| UCKL1 | Dendritic cell               | SKCM | -0.179703487 |
| UCKL1 | Dna_repair                   | SKCM | 0.074335513  |
| UCKL1 | Dna_replication              | SKCM | 0.075674963  |
| UCKL1 | Double-negative memory       | SKCM | 0.010631643  |
| UCKL1 | Drug metabolism - cytoch     | SKCM | -0.091899072 |
| UCKL1 | Drug metabolism - other c    | SKCM | 0.02574719   |
| UCKL1 | E2f_targets                  | SKCM | 0.072107834  |
| UCKL1 | Ecm_receptor_interaction     | SKCM | -0.179560108 |
| UCKL1 | Effector cd4+ memory t (     | SKCM | -0.06192244  |
| UCKL1 | Effector cd8+ memory t (     | SKCM | -0.107923997 |
| UCKL1 | Effector memory t cell       | SKCM | -0.085086026 |
| UCKL1 | Effector regulatory t (treg  | SKCM | -0.024987101 |
| UCKL1 | Elvidge_hif1a_targets_up     | SKCM | -0.098392009 |
| UCKL1 | Endothelial cell             | SKCM | -0.186684441 |
| UCKL1 | Eosinophil                   | SKCM | -0.143481629 |
| UCKL1 | Ether lipid metabolism       | SKCM | -0.091893988 |
| UCKL1 | Exhausted cd4+ t cell        | SKCM | -0.111906396 |
| UCKL1 | Exhausted cd8+ t cell        | SKCM | -0.111464737 |
| UCKL1 | Exhausted t cell             | SKCM | -0.05325254  |
| UCKL1 | Fat cell (adipocyte)         | SKCM | 0.053559582  |
| UCKL1 | Fatty acid biosynthesis      | SKCM | -0.078904313 |
| UCKL1 | Fatty acid degradation       | SKCM | -0.189437535 |
| UCKL1 | Fatty acid elongation        | SKCM | -0.186608634 |
| UCKL1 | Fibroblast                   | SKCM | -0.296477088 |
| UCKL1 | Folate biosynthesis          | SKCM | -0.162019795 |
| UCKL1 | Follicular b cell            | SKCM | -0.117381652 |
| UCKL1 | Follicular dendritic cell    | SKCM | -0.066417225 |
| UCKL1 | Follicular helper (tfh) t ce | SKCM | -0.1416617   |

|       |                            |      |              |
|-------|----------------------------|------|--------------|
| UCKL1 | Follicular t cell          | SKCM | 0.016771577  |
| UCKL1 | Foxp3+il-17+ t cell        | SKCM | -0.140043099 |
| UCKL1 | Fructose and mannose me    | SKCM | -0.016279804 |
| UCKL1 | G2m_checkpoint             | SKCM | 0.032270418  |
| UCKL1 | Galactose metabolism       | SKCM | -0.110096011 |
| UCKL1 | Galie_tumor_stemness_ge    | SKCM | -0.276647587 |
| UCKL1 | Glutathione metabolism     | SKCM | -0.132072031 |
| UCKL1 | Glycerolipid metabolism    | SKCM | 0.057635543  |
| UCKL1 | Glycerophospholipid metæ   | SKCM | 0.030957558  |
| UCKL1 | Glycine, serine and threor | SKCM | -0.002028493 |
| UCKL1 | Glycolysis / gluconeogene  | SKCM | -0.057355767 |
| UCKL1 | Glycosaminoglycan biosyn   | SKCM | -0.015098672 |
| UCKL1 | Glycosaminoglycan biosyn   | SKCM | -0.196349512 |
| UCKL1 | Glycosaminoglycan biosyn   | SKCM | -0.091932044 |
| UCKL1 | Glycosaminoglycan degra    | SKCM | -0.203055551 |
| UCKL1 | Glycosphingolipid biosyn   | SKCM | -0.095677263 |
| UCKL1 | Glycosphingolipid biosyn   | SKCM | -0.16115343  |
| UCKL1 | Glycosphingolipid biosyn   | SKCM | -0.123299318 |
| UCKL1 | Glycosylphosphatidylinos   | SKCM | -0.147838325 |
| UCKL1 | Glyoxylate and dicarboxy   | SKCM | -0.094206877 |
| UCKL1 | Granulocyte                | SKCM | -0.152268494 |
| UCKL1 | Hedgehog_signaling         | SKCM | -0.217018742 |
| UCKL1 | Histidine metabolism       | SKCM | -0.145040675 |
| UCKL1 | Hypoxia                    | SKCM | -0.173875558 |
| UCKL1 | Il-17ralpha t cell         | SKCM | -0.092258766 |
| UCKL1 | Il2_stat5_signaling        | SKCM | -0.18982721  |
| UCKL1 | Il6_jak_stat3_signaling    | SKCM | -0.203301487 |
| UCKL1 | Immune_checkpoints_tun     | SKCM | -0.248712525 |
| UCKL1 | Immune_inhibition_cytok    | SKCM | -0.223270856 |
| UCKL1 | Inositol phosphate metabo  | SKCM | -0.131518103 |
| UCKL1 | Interleukin_6_signaling    | SKCM | -0.202825525 |
| UCKL1 | Jaeger_metastasis_up       | SKCM | -0.101505192 |
| UCKL1 | Jain_nfkb_signaling        | SKCM | 0.202055603  |
| UCKL1 | Kras_signaling_up          | SKCM | -0.276157801 |
| UCKL1 | Linoleic acid metabolism   | SKCM | -0.011919858 |
| UCKL1 | Lipoic acid metabolism     | SKCM | 0.090329887  |
| UCKL1 | Lysine degradation         | SKCM | 0.03825228   |
| UCKL1 | Lysosome                   | SKCM | -0.310565859 |
| UCKL1 | M1 macrophage              | SKCM | -0.222721671 |
| UCKL1 | M2 macrophage              | SKCM | -0.194044024 |
| UCKL1 | Mannose type o-glycan bi   | SKCM | 0.212518317  |
| UCKL1 | Mapk_signaling_pathway     | SKCM | -0.086458321 |
| UCKL1 | Mapk3_erk1_activation      | SKCM | -0.13108188  |

|       |                                                   |      |              |
|-------|---------------------------------------------------|------|--------------|
| UCKL1 | Marginal zone b cell                              | SKCM | -0.138822198 |
| UCKL1 | Memory b cell                                     | SKCM | -0.124239823 |
| UCKL1 | Mesenchymal cell                                  | SKCM | -0.085187406 |
| UCKL1 | Mesenchymal stem cell                             | SKCM | -0.245589599 |
| UCKL1 | Metabolism of xenobiotics                         | SKCM | -0.073339602 |
| UCKL1 | Migrating cancer stem cell                        | SKCM | -0.136294188 |
| UCKL1 | Mitotic_spindle                                   | SKCM | -0.059693391 |
| UCKL1 | Monocyte                                          | SKCM | -0.166441406 |
| UCKL1 | Mtor_signaling_pathway                            | SKCM | -0.039781843 |
| UCKL1 | Mtorc1_signaling                                  | SKCM | -0.168119769 |
| UCKL1 | Mucin type o-glycan biosynthesis                  | SKCM | -0.151316198 |
| UCKL1 | Myc_targets_v1                                    | SKCM | 0.103617137  |
| UCKL1 | Myeloid cell                                      | SKCM | -0.173808595 |
| UCKL1 | N-glycan biosynthesis                             | SKCM | -0.150804597 |
| UCKL1 | Naive b cell                                      | SKCM | -0.087011419 |
| UCKL1 | Naive cd4+ t cell                                 | SKCM | -0.183168344 |
| UCKL1 | Naive cd8+ t cell                                 | SKCM | -0.112484695 |
| UCKL1 | Natural killer cell                               | SKCM | -0.122183043 |
| UCKL1 | Natural killer t (nkt) cell                       | SKCM | 0.028300799  |
| UCKL1 | Natural regulatory t (treg) cell                  | SKCM | -0.12132012  |
| UCKL1 | Neomycin, kanamycin and streptomycin              | SKCM | 0.034766843  |
| UCKL1 | Neutrophil                                        | SKCM | -0.242563279 |
| UCKL1 | Nicotinate and nicotinamide metabolism            | SKCM | -0.192584207 |
| UCKL1 | Nitrogen metabolism                               | SKCM | -0.175529117 |
| UCKL1 | Nod_like_receptor_signaling                       | SKCM | -0.228573833 |
| UCKL1 | Notch_signaling                                   | SKCM | -0.042772686 |
| UCKL1 | One carbon pool by folate                         | SKCM | 0.021031692  |
| UCKL1 | Other glycan degradation                          | SKCM | -0.115117824 |
| UCKL1 | Other types of o-glycan biosynthesis              | SKCM | 0.158806916  |
| UCKL1 | Oxidative phosphorylation                         | SKCM | 0.040950565  |
| UCKL1 | P53_pathway                                       | SKCM | -0.153742013 |
| UCKL1 | P53_signaling_pathway                             | SKCM | -0.062762349 |
| UCKL1 | Pantothenate and coa biosynthesis                 | SKCM | -0.150655944 |
| UCKL1 | Pentose and glucuronate interconversions          | SKCM | -0.291318747 |
| UCKL1 | Pentose phosphate pathway                         | SKCM | 0.036462391  |
| UCKL1 | Pericyte                                          | SKCM | -0.242856479 |
| UCKL1 | Phenylalanine metabolism                          | SKCM | 0.009996736  |
| UCKL1 | Phenylalanine, tyrosine and tryptophan metabolism | SKCM | -0.017867002 |
| UCKL1 | Phosphonate and phosphonate metabolism            | SKCM | -0.159065449 |
| UCKL1 | Pi3k_akt_activation                               | SKCM | -0.032375655 |
| UCKL1 | Pi3k_akt_mtor_signaling                           | SKCM | -0.175043314 |
| UCKL1 | Porphyrin and chlorophyll metabolism              | SKCM | -0.142918336 |
| UCKL1 | Primary bile acid biosynthesis                    | SKCM | -0.068760992 |

|       |                            |      |              |
|-------|----------------------------|------|--------------|
| UCKL1 | Propanoate metabolism      | SKCM | -0.168296109 |
| UCKL1 | Purine metabolism          | SKCM | 0.070110603  |
| UCKL1 | Pyrimidine metabolism      | SKCM | 0.142630585  |
| UCKL1 | Pyruvate metabolism        | SKCM | -0.14339444  |
| UCKL1 | Regulation_of_autophagy    | SKCM | -0.031965732 |
| UCKL1 | Retinol metabolism         | SKCM | -0.120114156 |
| UCKL1 | Riboflavin metabolism      | SKCM | -0.1217746   |
| UCKL1 | Schmahl_pdgf_signaling     | SKCM | -0.233932152 |
| UCKL1 | Selenocompound metabol     | SKCM | 0.028170547  |
| UCKL1 | Signaling_by_hippo         | SKCM | -0.178707396 |
| UCKL1 | Sphingolipid metabolism    | SKCM | -0.155576928 |
| UCKL1 | Starch and sucrose metabo  | SKCM | -0.205735883 |
| UCKL1 | Steroid biosynthesis       | SKCM | -0.085396035 |
| UCKL1 | Steroid hormone biosynth   | SKCM | -0.156823411 |
| UCKL1 | Sulfur metabolism          | SKCM | -0.160197227 |
| UCKL1 | Synthesis and degradation  | SKCM | -0.121207618 |
| UCKL1 | T helper cell              | SKCM | -0.180070654 |
| UCKL1 | T helper1 (th1) cell       | SKCM | -0.112635449 |
| UCKL1 | T helper17 (th17) cell     | SKCM | -0.153098515 |
| UCKL1 | T helper2 (th2) cell       | SKCM | -0.153953524 |
| UCKL1 | T helper9 (th9) cell       | SKCM | -0.085491038 |
| UCKL1 | Taurine and hypotaurine r  | SKCM | 0.071170155  |
| UCKL1 | Terpenoid backbone biosy   | SKCM | -0.107011514 |
| UCKL1 | Tgf_beta_signaling_pathw   | SKCM | -0.136964045 |
| UCKL1 | Thiamine metabolism        | SKCM | -0.133982979 |
| UCKL1 | Tnfa_signaling_via_nfb     | SKCM | -0.227631264 |
| UCKL1 | Tryptophan metabolism      | SKCM | -0.143007987 |
| UCKL1 | Tumor endothelial cell     | SKCM | -0.079633102 |
| UCKL1 | Tyrosine metabolism        | SKCM | 0.001065122  |
| UCKL1 | Ubiquinone and other ter   | SKCM | -0.130961226 |
| UCKL1 | Valine, leucine and isoleu | SKCM | 0.059617267  |
| UCKL1 | Valine, leucine and isoleu | SKCM | -0.158322858 |
| UCKL1 | Vascular endothelial cell  | SKCM | -0.142039969 |
| UCKL1 | Vascular smooth muscle c   | SKCM | -0.158228914 |
| UCKL1 | Vegf_signaling_pathway     | SKCM | -0.171030846 |
| UCKL1 | Vitamin b6 metabolism      | SKCM | -0.191812855 |
| UCKL1 | Willert_wnt_signaling      | SKCM | -0.145518095 |
| UCKL1 | Wnt_beta_catenin_signali   | SKCM | 0.038637809  |
| UPP1  | Abnormal plasma cell       | SKCM | -0.206098907 |
| UPP1  | Activated b cell           | SKCM | 0.074525502  |
| UPP1  | Activated cd4+ t cell      | SKCM | -0.041544218 |
| UPP1  | Activated t cell           | SKCM | 0.057943584  |
| UPP1  | Alanine, aspartate and glu | SKCM | 0.169671222  |

|      |                            |      |              |
|------|----------------------------|------|--------------|
| UPP1 | Alcala_apoptosis           | SKCM | 0.369640804  |
| UPP1 | Alpha-linolenic acid meta  | SKCM | 0.040761774  |
| UPP1 | Amino sugar and nucleoti   | SKCM | 0.522959248  |
| UPP1 | Ampk_pathway               | SKCM | 0.166123981  |
| UPP1 | Angiogenesis               | SKCM | 0.009397344  |
| UPP1 | Arachidonic acid metabol   | SKCM | 0.028722624  |
| UPP1 | Arginine and proline metæ  | SKCM | 0.374478973  |
| UPP1 | Arginine biosynthesis      | SKCM | 0.293462703  |
| UPP1 | Ascorbate and aldarate me  | SKCM | 0.120405569  |
| UPP1 | Atypical memory b cell     | SKCM | 0.037666985  |
| UPP1 | Axl+siglec6+ dendritic ce  | SKCM | 0.069525956  |
| UPP1 | B cell                     | SKCM | -0.058898136 |
| UPP1 | B1 cell                    | SKCM | 0.062165694  |
| UPP1 | Basal cell                 | SKCM | 0.012425445  |
| UPP1 | Beta-alanine metabolism    | SKCM | 0.170709132  |
| UPP1 | Biosynthesis of unsaturate | SKCM | 0.336046704  |
| UPP1 | Biotin metabolism          | SKCM | 0.320018231  |
| UPP1 | Butanoate metabolism       | SKCM | 0.29973771   |
| UPP1 | Caffeine metabolism        | SKCM | 0.017557531  |
| UPP1 | Cancer stem cell           | SKCM | -0.121372459 |
| UPP1 | Cancer stem-like cell      | SKCM | -0.122477093 |
| UPP1 | Cd4+ cytotoxic t cell      | SKCM | 0.157444912  |
| UPP1 | Cd4+ memory t cell         | SKCM | 0.066903356  |
| UPP1 | Cd4+ regulatory t cell     | SKCM | 0.068629638  |
| UPP1 | Cd4+ t helper cell         | SKCM | 0.008195467  |
| UPP1 | Cd4+cd25+ regulatory t c   | SKCM | 0.006691894  |
| UPP1 | Cd8+ cytotoxic t cell      | SKCM | 0.064682072  |
| UPP1 | Cd8+ regulatory t cell     | SKCM | 0.035880884  |
| UPP1 | Cell_cycle                 | SKCM | 0.009751533  |
| UPP1 | Chandran_metastasis_top    | SKCM | -0.099076215 |
| UPP1 | Citrate cycle (tca cycle)  | SKCM | 0.452942697  |
| UPP1 | Cysteine and methionine r  | SKCM | 0.242374299  |
| UPP1 | Cytokine induced killer c  | SKCM | -0.067288949 |
| UPP1 | D-arginine and d-ornithin  | SKCM | 0.075946139  |
| UPP1 | D-glutamine and d-glutan   | SKCM | -0.145098678 |
| UPP1 | Dendritic cell             | SKCM | 0.08578039   |
| UPP1 | Dna_repair                 | SKCM | 0.413821014  |
| UPP1 | Dna_replication            | SKCM | 0.264667175  |
| UPP1 | Double-negative memory     | SKCM | 0.037511022  |
| UPP1 | Drug metabolism - cytoch   | SKCM | 0.134464868  |
| UPP1 | Drug metabolism - other    | SKCM | 0.448743138  |
| UPP1 | E2f_targets                | SKCM | 0.044566118  |
| UPP1 | Ecm_receptor_interaction   | SKCM | -0.038336551 |

|      |                                   |              |
|------|-----------------------------------|--------------|
| UPP1 | Effector cd4+ memory t ( SKCM     | -0.076189841 |
| UPP1 | Effector cd8+ memory t ( SKCM     | 0.125831948  |
| UPP1 | Effector memory t cell SKCM       | -0.003981693 |
| UPP1 | Effector regulatory t (treg SKCM  | -0.085475576 |
| UPP1 | Elvidge_hif1a_targets_up SKCM     | 0.260594655  |
| UPP1 | Endothelial cell SKCM             | -0.202445562 |
| UPP1 | Eosinophil SKCM                   | 0.133741391  |
| UPP1 | Ether lipid metabolism SKCM       | 0.019826572  |
| UPP1 | Exhausted cd4+ t cell SKCM        | -0.038295392 |
| UPP1 | Exhausted cd8+ t cell SKCM        | 0.04846286   |
| UPP1 | Exhausted t cell SKCM             | 0.088719009  |
| UPP1 | Fat cell (adipocyte) SKCM         | 0.157310021  |
| UPP1 | Fatty acid biosynthesis SKCM      | 0.307048729  |
| UPP1 | Fatty acid degradation SKCM       | 0.299014147  |
| UPP1 | Fatty acid elongation SKCM        | 0.409957268  |
| UPP1 | Fibroblast SKCM                   | -0.065282712 |
| UPP1 | Folate biosynthesis SKCM          | 0.592243889  |
| UPP1 | Follicular b cell SKCM            | -0.049868841 |
| UPP1 | Follicular dendritic cell SKCM    | -0.079321006 |
| UPP1 | Follicular helper (tfh) t ce SKCM | 0.168331596  |
| UPP1 | Follicular t cell SKCM            | 0.082940828  |
| UPP1 | Foxp3+il-17+ t cell SKCM          | 0.180156408  |
| UPP1 | Fructose and mannose me SKCM      | 0.615961284  |
| UPP1 | G2m_checkpoint SKCM               | 0.01940682   |
| UPP1 | Galactose metabolism SKCM         | 0.500989593  |
| UPP1 | Galie_tumor_stemness_ge SKCM      | -0.138556771 |
| UPP1 | Glutathione metabolism SKCM       | 0.514815846  |
| UPP1 | Glycerolipid metabolism SKCM      | 0.342070286  |
| UPP1 | Glycerophospholipid metæ SKCM     | 0.216190901  |
| UPP1 | Glycine, serine and threor SKCM   | 0.370170544  |
| UPP1 | Glycolysis / gluconeogene SKCM    | 0.52156857   |
| UPP1 | Glycosaminoglycan biosy1 SKCM     | 0.089785348  |
| UPP1 | Glycosaminoglycan biosy1 SKCM     | -0.152299566 |
| UPP1 | Glycosaminoglycan biosy1 SKCM     | 0.245505417  |
| UPP1 | Glycosaminoglycan degra SKCM      | 0.292863072  |
| UPP1 | Glycosphingolipid biosyn1 SKCM    | 0.28746127   |
| UPP1 | Glycosphingolipid biosyn1 SKCM    | 0.423919192  |
| UPP1 | Glycosphingolipid biosyn1 SKCM    | 0.215356533  |
| UPP1 | Glycosylphosphatidylinos: SKCM    | -0.021260385 |
| UPP1 | Glyoxylate and dicarboxy SKCM     | 0.373228127  |
| UPP1 | Granulocyte SKCM                  | 0.039221174  |
| UPP1 | Hedgehog_signaling SKCM           | -0.019208763 |
| UPP1 | Histidine metabolism SKCM         | 0.040164536  |



|      |                             |      |              |
|------|-----------------------------|------|--------------|
| UPP1 | Hypoxia                     | SKCM | 0.397751228  |
| UPP1 | Il-17alpha t cell           | SKCM | 0.053847057  |
| UPP1 | Il2_stat5_signaling         | SKCM | 0.313186267  |
| UPP1 | Il6_jak_stat3_signaling     | SKCM | 0.191802819  |
| UPP1 | Immune_checkpoints_tun      | SKCM | 0.183958479  |
| UPP1 | Immune_inhibition_cytok     | SKCM | 0.215926828  |
| UPP1 | Inositol phosphate metabo   | SKCM | -0.184842704 |
| UPP1 | Interleukin_6_signaling     | SKCM | -0.051794904 |
| UPP1 | Jaeger_metastasis_up        | SKCM | 0.223441343  |
| UPP1 | Jain_nfkb_signaling         | SKCM | 0.078931521  |
| UPP1 | Kras_signaling_up           | SKCM | -0.025108445 |
| UPP1 | Linoleic acid metabolism    | SKCM | -0.075778402 |
| UPP1 | Lipoic acid metabolism      | SKCM | -0.235736682 |
| UPP1 | Lysine degradation          | SKCM | 0.048011868  |
| UPP1 | Lysosome                    | SKCM | 0.533243062  |
| UPP1 | M1 macrophage               | SKCM | 0.104628846  |
| UPP1 | M2 macrophage               | SKCM | 0.078764912  |
| UPP1 | Mannose type o-glycan bi    | SKCM | 0.322468587  |
| UPP1 | Mapk_signaling_pathway      | SKCM | 0.128958731  |
| UPP1 | Mapk3_erk1_activation       | SKCM | 0.029949559  |
| UPP1 | Marginal zone b cell        | SKCM | -0.082799124 |
| UPP1 | Memory b cell               | SKCM | -0.092242324 |
| UPP1 | Mesenchymal cell            | SKCM | -0.09838623  |
| UPP1 | Mesenchymal stem cell       | SKCM | -0.0704221   |
| UPP1 | Metabolism of xenobiotic    | SKCM | 0.26115445   |
| UPP1 | Migrating cancer stem cel   | SKCM | 0.003850667  |
| UPP1 | Mitotic_spindle             | SKCM | -0.104404524 |
| UPP1 | Monocyte                    | SKCM | 0.196664888  |
| UPP1 | Mtor_signaling_pathway      | SKCM | 0.104041341  |
| UPP1 | Mtorc1_signaling            | SKCM | 0.475866455  |
| UPP1 | Mucin type o-glycan biosy   | SKCM | 0.175585966  |
| UPP1 | Myc_targets_v1              | SKCM | 0.209063588  |
| UPP1 | Myeloid cell                | SKCM | 0.006110157  |
| UPP1 | N-glycan biosynthesis       | SKCM | 0.322310695  |
| UPP1 | Naive b cell                | SKCM | -0.087492705 |
| UPP1 | Naive cd4+ t cell           | SKCM | -0.263157602 |
| UPP1 | Naive cd8+ t cell           | SKCM | -0.419461486 |
| UPP1 | Natural killer cell         | SKCM | 0.074254176  |
| UPP1 | Natural killer t (nkt) cell | SKCM | -0.144086911 |
| UPP1 | Natural regulatory t (treg) | SKCM | 0.009864457  |
| UPP1 | Neomycin, kanamycin and     | SKCM | 0.213263865  |
| UPP1 | Neutrophil                  | SKCM | 0.23417465   |
| UPP1 | Nicotinate and nicotinami   | SKCM | 0.278239618  |

|      |                            |      |              |
|------|----------------------------|------|--------------|
| UPP1 | Nitrogen metabolism        | SKCM | -0.06300577  |
| UPP1 | Nod_like_receptor_signal   | SKCM | 0.078731708  |
| UPP1 | Notch_signaling            | SKCM | 0.147464472  |
| UPP1 | One carbon pool by folate  | SKCM | -0.017595754 |
| UPP1 | Other glycan degradation   | SKCM | 0.317316217  |
| UPP1 | Other types of o-glycan b  | SKCM | 0.092348467  |
| UPP1 | Oxidative phosphorylatio   | SKCM | 0.52505649   |
| UPP1 | P53_pathway                | SKCM | 0.195728325  |
| UPP1 | P53_signaling_pathway      | SKCM | -0.072212207 |
| UPP1 | Pantothenate and coa bios  | SKCM | 0.241618549  |
| UPP1 | Pentose and glucuronate in | SKCM | 0.379023801  |
| UPP1 | Pentose phosphate pathwa   | SKCM | 0.660882777  |
| UPP1 | Pericyte                   | SKCM | -0.089222439 |
| UPP1 | Phenylalanine metabolism   | SKCM | 0.296356624  |
| UPP1 | Phenylalanine, tyrosine ar | SKCM | 0.400076229  |
| UPP1 | Phosphonate and phosphir   | SKCM | 0.259985832  |
| UPP1 | Pi3k_akt_activation        | SKCM | -0.060639025 |
| UPP1 | Pi3k_akt_mtor_signaling    | SKCM | 0.407937427  |
| UPP1 | Porphyrin and chlorophyl   | SKCM | 0.5308731    |
| UPP1 | Primary bile acid biosynt  | SKCM | 0.047712506  |
| UPP1 | Propanoate metabolism      | SKCM | 0.083227397  |
| UPP1 | Purine metabolism          | SKCM | 0.495242997  |
| UPP1 | Pyrimidine metabolism      | SKCM | 0.426746975  |
| UPP1 | Pyruvate metabolism        | SKCM | 0.391590668  |
| UPP1 | Regulation_of_autophagy    | SKCM | 0.065977912  |
| UPP1 | Retinol metabolism         | SKCM | 0.125132466  |
| UPP1 | Riboflavin metabolism      | SKCM | 0.477761933  |
| UPP1 | Schmahl_pdgf_signaling     | SKCM | -0.025086527 |
| UPP1 | Selenocompound metabol     | SKCM | 0.036821648  |
| UPP1 | Signaling_by_hippo         | SKCM | -0.187092793 |
| UPP1 | Sphingolipid metabolism    | SKCM | 0.337065689  |
| UPP1 | Starch and sucrose metabo  | SKCM | 0.274670059  |
| UPP1 | Steroid biosynthesis       | SKCM | 0.434769206  |
| UPP1 | Steroid hormone biosynth   | SKCM | 0.096104651  |
| UPP1 | Sulfur metabolism          | SKCM | 0.032292719  |
| UPP1 | Synthesis and degradation  | SKCM | 0.305235764  |
| UPP1 | T helper cell              | SKCM | 0.121949108  |
| UPP1 | T helper1 (th1) cell       | SKCM | 0.091247409  |
| UPP1 | T helper17 (th17) cell     | SKCM | 0.143155968  |
| UPP1 | T helper2 (th2) cell       | SKCM | 0.082564562  |
| UPP1 | T helper9 (th9) cell       | SKCM | 0.051191052  |
| UPP1 | Taurine and hypotaurine r  | SKCM | -0.037022384 |
| UPP1 | Terpenoid backbone biosy   | SKCM | 0.301368124  |

|      |                            |      |              |
|------|----------------------------|------|--------------|
| UPP1 | Tgf_beta_signaling_pathw   | SKCM | -0.380447904 |
| UPP1 | Thiamine metabolism        | SKCM | 0.508879469  |
| UPP1 | Tnfa_signaling_via_nfk     | SKCM | 0.330709997  |
| UPP1 | Tryptophan metabolism      | SKCM | 0.343116245  |
| UPP1 | Tumor endothelial cell     | SKCM | -0.037053999 |
| UPP1 | Tyrosine metabolism        | SKCM | 0.276439304  |
| UPP1 | Ubiquinone and other ter   | SKCM | 0.510851846  |
| UPP1 | Valine, leucine and isoleu | SKCM | 0.529540608  |
| UPP1 | Valine, leucine and isoleu | SKCM | 0.290051097  |
| UPP1 | Vascular endothelial cell  | SKCM | 0.207673478  |
| UPP1 | Vascular smooth muscle c   | SKCM | 0.019637598  |
| UPP1 | Vegf_signaling_pathway     | SKCM | 0.182273619  |
| UPP1 | Vitamin b6 metabolism      | SKCM | 0.430349481  |
| UPP1 | Willert_wnt_signaling      | SKCM | -0.10663214  |
| UPP1 | Wnt_beta_catenin_signali   | SKCM | -0.006678888 |
| UPP2 | Abnormal plasma cell       | SKCM | 0.168829447  |
| UPP2 | Activated b cell           | SKCM | 0.055160479  |
| UPP2 | Activated cd4+ t cell      | SKCM | 0.058237541  |
| UPP2 | Activated t cell           | SKCM | 0.023961969  |
| UPP2 | Alanine, aspartate and glu | SKCM | -0.08560438  |
| UPP2 | Alcala_apoptosis           | SKCM | -0.196434442 |
| UPP2 | Alpha-linolenic acid meta  | SKCM | -0.110917519 |
| UPP2 | Amino sugar and nucleoti   | SKCM | -0.243779011 |
| UPP2 | Ampk_pathway               | SKCM | -0.070651674 |
| UPP2 | Angiogenesis               | SKCM | 0.046340544  |
| UPP2 | Arachidonic acid metabol   | SKCM | -0.094204636 |
| UPP2 | Arginine and proline met   | SKCM | -0.247226121 |
| UPP2 | Arginine biosynthesis      | SKCM | -0.248282399 |
| UPP2 | Ascorbate and aldarate m   | SKCM | -0.238705769 |
| UPP2 | Atypical memory b cell     | SKCM | 0.00120868   |
| UPP2 | Axl+siglec6+ dendritic ce  | SKCM | -0.003377666 |
| UPP2 | B cell                     | SKCM | 0.098951963  |
| UPP2 | B1 cell                    | SKCM | -0.031952279 |
| UPP2 | Basal cell                 | SKCM | -0.124722238 |
| UPP2 | Beta-alanine metabolism    | SKCM | -0.074737465 |
| UPP2 | Biosynthesis of unsaturate | SKCM | -0.141060972 |
| UPP2 | Biotin metabolism          | SKCM | -0.047530668 |
| UPP2 | Butanoate metabolism       | SKCM | -0.228191909 |
| UPP2 | Caffeine metabolism        | SKCM | -0.082659985 |
| UPP2 | Cancer stem cell           | SKCM | 0.046535373  |
| UPP2 | Cancer stem-like cell      | SKCM | 0.198366476  |
| UPP2 | Cd4+ cytotoxic t cell      | SKCM | -0.01687241  |
| UPP2 | Cd4+ memory t cell         | SKCM | -0.025073118 |

|      |                              |      |              |
|------|------------------------------|------|--------------|
| UPP2 | Cd4+ regulatory t cell       | SKCM | 0.038835818  |
| UPP2 | Cd4+ t helper cell           | SKCM | 0.053102496  |
| UPP2 | Cd4+cd25+ regulatory t c     | SKCM | 0.055277804  |
| UPP2 | Cd8+ cytotoxic t cell        | SKCM | -0.007147651 |
| UPP2 | Cd8+ regulatory t cell       | SKCM | 0.014247049  |
| UPP2 | Cell_cycle                   | SKCM | -0.009471615 |
| UPP2 | Chandran_metastasis_top      | SKCM | -0.046350683 |
| UPP2 | Citrate cycle (tca cycle)    | SKCM | -0.313919661 |
| UPP2 | Cysteine and methionine r    | SKCM | -0.149746396 |
| UPP2 | Cytokine induced killer c    | SKCM | 0.162143521  |
| UPP2 | D-arginine and d-ornithin    | SKCM | 0.067205606  |
| UPP2 | D-glutamine and d-glutan     | SKCM | 0.001489901  |
| UPP2 | Dendritic cell               | SKCM | 0.034839832  |
| UPP2 | Dna_repair                   | SKCM | -0.15079769  |
| UPP2 | Dna_replication              | SKCM | -0.067267947 |
| UPP2 | Double-negative memory       | SKCM | -0.011960709 |
| UPP2 | Drug metabolism - cytoch     | SKCM | -0.182645397 |
| UPP2 | Drug metabolism - other      | SKCM | -0.264138124 |
| UPP2 | E2f_targets                  | SKCM | -0.051159986 |
| UPP2 | Ecm_receptor_interaction     | SKCM | 0.031363028  |
| UPP2 | Effector cd4+ memory t (     | SKCM | 0.05824302   |
| UPP2 | Effector cd8+ memory t (     | SKCM | -0.008462475 |
| UPP2 | Effector memory t cell       | SKCM | 0.035913917  |
| UPP2 | Effector regulatory t (treg  | SKCM | 0.068616509  |
| UPP2 | Elvidge_hif1a_targets_up     | SKCM | -0.2477875   |
| UPP2 | Endothelial cell             | SKCM | 0.155724717  |
| UPP2 | Eosinophil                   | SKCM | 0.020208368  |
| UPP2 | Ether lipid metabolism       | SKCM | -0.113649961 |
| UPP2 | Exhausted cd4+ t cell        | SKCM | 0.136024513  |
| UPP2 | Exhausted cd8+ t cell        | SKCM | 0.116822348  |
| UPP2 | Exhausted t cell             | SKCM | 0.018266685  |
| UPP2 | Fat cell (adipocyte)         | SKCM | -0.01413821  |
| UPP2 | Fatty acid biosynthesis      | SKCM | -0.184607827 |
| UPP2 | Fatty acid degradation       | SKCM | -0.241592785 |
| UPP2 | Fatty acid elongation        | SKCM | -0.200905576 |
| UPP2 | Fibroblast                   | SKCM | 0.097853271  |
| UPP2 | Folate biosynthesis          | SKCM | -0.278467546 |
| UPP2 | Follicular b cell            | SKCM | 0.057312178  |
| UPP2 | Follicular dendritic cell    | SKCM | 0.107953532  |
| UPP2 | Follicular helper (tfh) t ce | SKCM | -0.079540712 |
| UPP2 | Follicular t cell            | SKCM | -0.009242855 |
| UPP2 | Foxp3+il-17+ t cell          | SKCM | -0.083052883 |
| UPP2 | Fructose and mannose me      | SKCM | -0.185593521 |

|      |                            |      |              |
|------|----------------------------|------|--------------|
| UPP2 | G2m_checkpoint             | SKCM | -0.078245867 |
| UPP2 | Galactose metabolism       | SKCM | -0.216219101 |
| UPP2 | Galie_tumor_stemness_ge    | SKCM | 0.090735025  |
| UPP2 | Glutathione metabolism     | SKCM | -0.226216053 |
| UPP2 | Glycerolipid metabolism    | SKCM | -0.25011666  |
| UPP2 | Glycerophospholipid metæ   | SKCM | -0.122077649 |
| UPP2 | Glycine, serine and threor | SKCM | -0.141013224 |
| UPP2 | Glycolysis / gluconeogene  | SKCM | -0.229851111 |
| UPP2 | Glycosaminoglycan biosy    | SKCM | 0.059627441  |
| UPP2 | Glycosaminoglycan biosy    | SKCM | 0.055688579  |
| UPP2 | Glycosaminoglycan biosy    | SKCM | -0.070424728 |
| UPP2 | Glycosaminoglycan degra    | SKCM | -0.113185959 |
| UPP2 | Glycosphingolipid biosyn   | SKCM | -0.019677716 |
| UPP2 | Glycosphingolipid biosyn   | SKCM | -0.270133435 |
| UPP2 | Glycosphingolipid biosyn   | SKCM | -0.213981675 |
| UPP2 | Glycosylphosphatidylinos   | SKCM | -0.095744288 |
| UPP2 | Glyoxylate and dicarboxy   | SKCM | -0.232065683 |
| UPP2 | Granulocyte                | SKCM | 0.084081284  |
| UPP2 | Hedgehog_signaling         | SKCM | -0.019401215 |
| UPP2 | Histidine metabolism       | SKCM | -0.122402693 |
| UPP2 | Hypoxia                    | SKCM | -0.102049945 |
| UPP2 | Il-17alpha t cell          | SKCM | 0.011971046  |
| UPP2 | Il2_stat5_signaling        | SKCM | -0.070473941 |
| UPP2 | Il6_jak_stat3_signaling    | SKCM | 0.01524555   |
| UPP2 | Immune_checkpoints_tun     | SKCM | 0.011585926  |
| UPP2 | Immune_inhibition_cytok    | SKCM | -0.017107126 |
| UPP2 | Inositol phosphate metabo  | SKCM | -0.017201915 |
| UPP2 | Interleukin_6_signaling    | SKCM | 0.039661683  |
| UPP2 | Jaeger_metastasis_up       | SKCM | -0.002762219 |
| UPP2 | Jain_nfkb_signaling        | SKCM | -0.042470779 |
| UPP2 | Kras_signaling_up          | SKCM | 0.058093601  |
| UPP2 | Linoleic acid metabolism   | SKCM | -0.10885261  |
| UPP2 | Lipoic acid metabolism     | SKCM | 0.144323448  |
| UPP2 | Lysine degradation         | SKCM | -0.132417629 |
| UPP2 | Lysosome                   | SKCM | -0.198207543 |
| UPP2 | M1 macrophage              | SKCM | 0.043380827  |
| UPP2 | M2 macrophage              | SKCM | -0.019130129 |
| UPP2 | Mannose type o-glycan bi   | SKCM | -0.181801445 |
| UPP2 | Mapk_signaling_pathway     | SKCM | 0.010831379  |
| UPP2 | Mapk3_erk1_activation      | SKCM | 0.021772311  |
| UPP2 | Marginal zone b cell       | SKCM | 0.18545435   |
| UPP2 | Memory b cell              | SKCM | 0.084916352  |
| UPP2 | Mesenchymal cell           | SKCM | 0.169811903  |

|      |                             |      |              |
|------|-----------------------------|------|--------------|
| UPP2 | Mesenchymal stem cell       | SKCM | 0.14289666   |
| UPP2 | Metabolism of xenobiotic    | SKCM | -0.182703626 |
| UPP2 | Migrating cancer stem cel   | SKCM | 0.052161233  |
| UPP2 | Mitotic_spindle             | SKCM | -0.008075882 |
| UPP2 | Monocyte                    | SKCM | 0.000815138  |
| UPP2 | Mtor_signaling_pathway      | SKCM | -0.077473554 |
| UPP2 | Mtorc1_signaling            | SKCM | -0.274422478 |
| UPP2 | Mucin type o-glycan bios    | SKCM | -0.211177299 |
| UPP2 | Myc_targets_v1              | SKCM | -0.189231415 |
| UPP2 | Myeloid cell                | SKCM | 0.063982846  |
| UPP2 | N-glycan biosynthesis       | SKCM | -0.186007815 |
| UPP2 | Naive b cell                | SKCM | -0.031373213 |
| UPP2 | Naive cd4+ t cell           | SKCM | 0.055174146  |
| UPP2 | Naive cd8+ t cell           | SKCM | 0.126578149  |
| UPP2 | Natural killer cell         | SKCM | 0.044631455  |
| UPP2 | Natural killer t (nkt) cell | SKCM | 0.118906322  |
| UPP2 | Natural regulatory t (treg) | SKCM | 0.066689933  |
| UPP2 | Neomycin, kanamycin and     | SKCM | -0.058955595 |
| UPP2 | Neutrophil                  | SKCM | -0.109795141 |
| UPP2 | Nicotinate and nicotinami   | SKCM | -0.174635521 |
| UPP2 | Nitrogen metabolism         | SKCM | -0.082580158 |
| UPP2 | Nod_like_receptor_signal    | SKCM | 0.007634138  |
| UPP2 | Notch_signaling             | SKCM | -0.012832367 |
| UPP2 | One carbon pool by folate   | SKCM | -0.013566261 |
| UPP2 | Other glycan degradation    | SKCM | -0.088801946 |
| UPP2 | Other types of o-glycan b   | SKCM | 0.097718078  |
| UPP2 | Oxidative phosphorylatio    | SKCM | -0.202390635 |
| UPP2 | P53_pathway                 | SKCM | -0.111159027 |
| UPP2 | P53_signaling_pathway       | SKCM | 0.046368491  |
| UPP2 | Pantothenate and coa bios   | SKCM | -0.058064629 |
| UPP2 | Pentose and glucuronate in  | SKCM | -0.250230819 |
| UPP2 | Pentose phosphate pathwa    | SKCM | -0.238335272 |
| UPP2 | Pericyte                    | SKCM | 0.192836117  |
| UPP2 | Phenylalanine metabolism    | SKCM | -0.099961226 |
| UPP2 | Phenylalanine, tyrosine ar  | SKCM | -0.119143649 |
| UPP2 | Phosphonate and phosphir    | SKCM | -0.065851636 |
| UPP2 | Pi3k_akt_activation         | SKCM | 0.110519     |
| UPP2 | Pi3k_akt_mtor_signaling     | SKCM | -0.115610849 |
| UPP2 | Porphyrin and chlorophyl    | SKCM | -0.391159423 |
| UPP2 | Primary bile acid biosynt   | SKCM | 0.090963233  |
| UPP2 | Propanoate metabolism       | SKCM | -0.090893453 |
| UPP2 | Purine metabolism           | SKCM | -0.274226023 |
| UPP2 | Pyrimidine metabolism       | SKCM | -0.151127224 |

|      |                            |      |              |
|------|----------------------------|------|--------------|
| UPP2 | Pyruvate metabolism        | SKCM | -0.311226906 |
| UPP2 | Regulation_of_autophagy    | SKCM | 0.059353549  |
| UPP2 | Retinol metabolism         | SKCM | -0.148245044 |
| UPP2 | Riboflavin metabolism      | SKCM | -0.147992116 |
| UPP2 | Schmahl_pdgf_signaling     | SKCM | 0.02794136   |
| UPP2 | Selenocompound metabol     | SKCM | -0.068131159 |
| UPP2 | Signaling_by_hippo         | SKCM | -0.018580291 |
| UPP2 | Sphingolipid metabolism    | SKCM | -0.29913896  |
| UPP2 | Starch and sucrose metabo  | SKCM | -0.01029386  |
| UPP2 | Steroid biosynthesis       | SKCM | -0.250748647 |
| UPP2 | Steroid hormone biosynth   | SKCM | -0.11817991  |
| UPP2 | Sulfur metabolism          | SKCM | -0.087431022 |
| UPP2 | Synthesis and degradation  | SKCM | -0.206569326 |
| UPP2 | T helper cell              | SKCM | 0.010443121  |
| UPP2 | T helper1 (th1) cell       | SKCM | -0.026171037 |
| UPP2 | T helper17 (th17) cell     | SKCM | -0.031248879 |
| UPP2 | T helper2 (th2) cell       | SKCM | -0.02373133  |
| UPP2 | T helper9 (th9) cell       | SKCM | -0.049657169 |
| UPP2 | Taurine and hypotaurine r  | SKCM | 0.030826656  |
| UPP2 | Terpenoid backbone biosy   | SKCM | -0.268181007 |
| UPP2 | Tgf_beta_signaling_pathw   | SKCM | 0.153910336  |
| UPP2 | Thiamine metabolism        | SKCM | -0.138749328 |
| UPP2 | Tnfa_signaling_via_nfk     | SKCM | -0.020469034 |
| UPP2 | Tryptophan metabolism      | SKCM | -0.112191369 |
| UPP2 | Tumor endothelial cell     | SKCM | -0.103425121 |
| UPP2 | Tyrosine metabolism        | SKCM | -0.157176315 |
| UPP2 | Ubiquinone and other ter   | SKCM | -0.16495405  |
| UPP2 | Valine, leucine and isoleu | SKCM | -0.045586875 |
| UPP2 | Valine, leucine and isoleu | SKCM | -0.150985739 |
| UPP2 | Vascular endothelial cell  | SKCM | -0.023265353 |
| UPP2 | Vascular smooth muscle c   | SKCM | 0.063175423  |
| UPP2 | Vegf_signaling_pathway     | SKCM | -0.053664918 |
| UPP2 | Vitamin b6 metabolism      | SKCM | -0.077224015 |
| UPP2 | Willert_wnt_signaling      | SKCM | -0.062851985 |
| UPP2 | Wnt_beta_catenin_signali   | SKCM | -0.018117153 |
| CDA  | Abnormal plasma cell       | STAD | -0.1323989   |
| CDA  | Activated b cell           | STAD | -0.183365942 |
| CDA  | Activated cd4+ t cell      | STAD | -0.179320782 |
| CDA  | Activated t cell           | STAD | -0.225247467 |
| CDA  | Alanine, aspartate and glu | STAD | -0.057625084 |
| CDA  | Alcala_apoptosis           | STAD | -0.021180655 |
| CDA  | Alpha-linolenic acid meta  | STAD | 0.204173727  |
| CDA  | Amino sugar and nucleoti   | STAD | 0.057684912  |

|     |                                         |      |              |
|-----|-----------------------------------------|------|--------------|
| CDA | Ampk_pathway                            | STAD | -0.090955414 |
| CDA | Angiogenesis                            | STAD | 0.199968565  |
| CDA | Arachidonic acid metabolism             | STAD | 0.29892398   |
| CDA | Arginine and proline metabolism         | STAD | 0.127798994  |
| CDA | Arginine biosynthesis                   | STAD | 0.116255555  |
| CDA | Ascorbate and aldarate metabolism       | STAD | -0.002424913 |
| CDA | Atypical memory b cell                  | STAD | -0.109967456 |
| CDA | Axl+siglec6+ dendritic cell             | STAD | 0.030481775  |
| CDA | B cell                                  | STAD | -0.215660309 |
| CDA | B1 cell                                 | STAD | -0.22067601  |
| CDA | Basal cell                              | STAD | 0.527971062  |
| CDA | Beta-alanine metabolism                 | STAD | -0.074047834 |
| CDA | Biosynthesis of unsaturated fatty acids | STAD | 0.146776384  |
| CDA | Biotin metabolism                       | STAD | -0.199641008 |
| CDA | Butanoate metabolism                    | STAD | -0.153707183 |
| CDA | Caffeine metabolism                     | STAD | 0.084856826  |
| CDA | Cancer stem cell                        | STAD | 0.133066057  |
| CDA | Cancer stem-like cell                   | STAD | -0.083897325 |
| CDA | Cd4+ cytotoxic t cell                   | STAD | -0.056087886 |
| CDA | Cd4+ memory t cell                      | STAD | -0.185623514 |
| CDA | Cd4+ regulatory t cell                  | STAD | -0.145377299 |
| CDA | Cd4+ t helper cell                      | STAD | -0.219293342 |
| CDA | Cd4+cd25+ regulatory t cell             | STAD | -0.210030293 |
| CDA | Cd8+ cytotoxic t cell                   | STAD | -0.170836621 |
| CDA | Cd8+ regulatory t cell                  | STAD | -0.253910753 |
| CDA | Cell_cycle                              | STAD | -0.037975933 |
| CDA | Chandran_metastasis_top5                | STAD | -0.166492013 |
| CDA | Citrate cycle (tca cycle)               | STAD | -0.013180148 |
| CDA | Cysteine and methionine metabolism      | STAD | -0.014476898 |
| CDA | Cytokine induced killer cell            | STAD | -0.252894928 |
| CDA | D-arginine and d-ornithine              | STAD | 0.110449102  |
| CDA | D-glutamine and d-glutamate             | STAD | -0.08463681  |
| CDA | Dendritic cell                          | STAD | -0.095805964 |
| CDA | Dna_repair                              | STAD | 0.064399278  |
| CDA | Dna_replication                         | STAD | -0.061817682 |
| CDA | Double-negative memory t cell           | STAD | -0.178593155 |
| CDA | Drug metabolism - cytochrome p450       | STAD | 0.035284027  |
| CDA | Drug metabolism - other                 | STAD | 0.180517124  |
| CDA | E2f_targets                             | STAD | -0.06113923  |
| CDA | Ecm_receptor_interaction                | STAD | 0.114754657  |
| CDA | Effector cd4+ memory t cell             | STAD | -0.219725284 |
| CDA | Effector cd8+ memory t cell             | STAD | -0.055346641 |
| CDA | Effector memory t cell                  | STAD | -0.199786782 |



|     |                              |      |              |
|-----|------------------------------|------|--------------|
| CDA | Effector regulatory t (treg) | STAD | -0.175658343 |
| CDA | Elvidge_hif1a_targets_up     | STAD | -0.028121162 |
| CDA | Endothelial cell             | STAD | -0.059723043 |
| CDA | Eosinophil                   | STAD | -0.065218355 |
| CDA | Ether lipid metabolism       | STAD | 0.120398829  |
| CDA | Exhausted cd4+ t cell        | STAD | -0.118066218 |
| CDA | Exhausted cd8+ t cell        | STAD | -0.098146355 |
| CDA | Exhausted t cell             | STAD | -0.22947451  |
| CDA | Fat cell (adipocyte)         | STAD | 0.096498893  |
| CDA | Fatty acid biosynthesis      | STAD | 0.001650325  |
| CDA | Fatty acid degradation       | STAD | -0.170012998 |
| CDA | Fatty acid elongation        | STAD | 0.165569171  |
| CDA | Fibroblast                   | STAD | 0.075708408  |
| CDA | Folate biosynthesis          | STAD | 0.115996594  |
| CDA | Follicular b cell            | STAD | -0.211626543 |
| CDA | Follicular dendritic cell    | STAD | -0.175647182 |
| CDA | Follicular helper (tfh) t ce | STAD | -0.142212977 |
| CDA | Follicular t cell            | STAD | -0.16778171  |
| CDA | Foxp3+il-17+ t cell          | STAD | -0.120397331 |
| CDA | Fructose and mannose me      | STAD | 0.046991961  |
| CDA | G2m_checkpoint               | STAD | -0.070833843 |
| CDA | Galactose metabolism         | STAD | 0.128506458  |
| CDA | Galie_tumor_stemness_ge      | STAD | 0.192126702  |
| CDA | Glutathione metabolism       | STAD | 0.149699389  |
| CDA | Glycerolipid metabolism      | STAD | 0.061396489  |
| CDA | Glycerophospholipid metæ     | STAD | 0.101067314  |
| CDA | Glycine, serine and threor   | STAD | 0.061154029  |
| CDA | Glycolysis / gluconeogene    | STAD | 0.032093518  |
| CDA | Glycosaminoglycan biosyn     | STAD | 0.149567938  |
| CDA | Glycosaminoglycan biosyn     | STAD | 0.018763161  |
| CDA | Glycosaminoglycan biosyn     | STAD | 0.132297935  |
| CDA | Glycosaminoglycan degra      | STAD | 0.008768385  |
| CDA | Glycosphingolipid biosyn     | STAD | 0.049722257  |
| CDA | Glycosphingolipid biosyn     | STAD | 0.077516601  |
| CDA | Glycosphingolipid biosyn     | STAD | 0.095308112  |
| CDA | Glycosylphosphatidylinos     | STAD | -0.08866806  |
| CDA | Glyoxylate and dicarboxy     | STAD | -0.127599948 |
| CDA | Granulocyte                  | STAD | -0.095561162 |
| CDA | Hedgehog_signaling           | STAD | 0.106095346  |
| CDA | Histidine metabolism         | STAD | -0.005576209 |
| CDA | Hypoxia                      | STAD | 0.319491559  |
| CDA | Il-17ralpha t cell           | STAD | -0.214980493 |
| CDA | Il2_stat5_signaling          | STAD | 0.033086201  |

|     |                             |      |              |
|-----|-----------------------------|------|--------------|
| CDA | Il6_jak_stat3_signaling     | STAD | 0.005884771  |
| CDA | Immune_checkpoints_tun      | STAD | -0.034842835 |
| CDA | Immune_inhibition_cytok     | STAD | 0.03912236   |
| CDA | Inositol phosphate metabo   | STAD | -0.2456271   |
| CDA | Interleukin_6_signaling     | STAD | -0.189893769 |
| CDA | Jaeger_metastasis_up        | STAD | 0.099547554  |
| CDA | Jain_nfkb_signaling         | STAD | -0.066321241 |
| CDA | Kras_signaling_up           | STAD | 0.014691273  |
| CDA | Linoleic acid metabolism    | STAD | 0.216892145  |
| CDA | Lipoic acid metabolism      | STAD | -0.208265971 |
| CDA | Lysine degradation          | STAD | -0.162679356 |
| CDA | Lysosome                    | STAD | 0.047594554  |
| CDA | M1 macrophage               | STAD | -0.052837217 |
| CDA | M2 macrophage               | STAD | -0.060642548 |
| CDA | Mannose type o-glycan bi    | STAD | -0.18647404  |
| CDA | Mapk_signaling_pathway      | STAD | 0.061303063  |
| CDA | Mapk3_erk1_activation       | STAD | -0.081574606 |
| CDA | Marginal zone b cell        | STAD | -0.214257493 |
| CDA | Memory b cell               | STAD | -0.240320622 |
| CDA | Mesenchymal cell            | STAD | 0.178961093  |
| CDA | Mesenchymal stem cell       | STAD | -0.018453051 |
| CDA | Metabolism of xenobiotic    | STAD | 0.070156689  |
| CDA | Migrating cancer stem cel   | STAD | 0.150763859  |
| CDA | Mitotic_spindle             | STAD | -0.05772724  |
| CDA | Monocyte                    | STAD | 0.059565498  |
| CDA | Mtor_signaling_pathway      | STAD | -0.107012258 |
| CDA | Mtorc1_signaling            | STAD | 0.077501517  |
| CDA | Mucin type o-glycan biosy   | STAD | -0.011016899 |
| CDA | Myc_targets_v1              | STAD | 0.014301604  |
| CDA | Myeloid cell                | STAD | -0.142622356 |
| CDA | N-glycan biosynthesis       | STAD | -0.027914469 |
| CDA | Naive b cell                | STAD | -0.155110688 |
| CDA | Naive cd4+ t cell           | STAD | -0.144574849 |
| CDA | Naive cd8+ t cell           | STAD | -0.11287375  |
| CDA | Natural killer cell         | STAD | -0.17116023  |
| CDA | Natural killer t (nkt) cell | STAD | -0.197762496 |
| CDA | Natural regulatory t (treg) | STAD | -0.180818319 |
| CDA | Neomycin, kanamycin and     | STAD | 0.23458377   |
| CDA | Neutrophil                  | STAD | 0.180618193  |
| CDA | Nicotinate and nicotinami   | STAD | 0.025617464  |
| CDA | Nitrogen metabolism         | STAD | -0.119242981 |
| CDA | Nod_like_receptor_signal    | STAD | -0.016503488 |
| CDA | Notch_signaling             | STAD | 0.141053262  |

|     |                            |      |              |
|-----|----------------------------|------|--------------|
| CDA | One carbon pool by folate  | STAD | -0.111043235 |
| CDA | Other glycan degradation   | STAD | -0.086040712 |
| CDA | Other types of o-glycan b  | STAD | 0.006841417  |
| CDA | Oxidative phosphorylatior  | STAD | 0.091052296  |
| CDA | P53_pathway                | STAD | 0.184891732  |
| CDA | P53_signaling_pathway      | STAD | -0.090025648 |
| CDA | Pantothenate and coa bios  | STAD | -0.048442131 |
| CDA | Pentose and glucuronate i  | STAD | -0.00855962  |
| CDA | Pentose phosphate pathwa   | STAD | 0.098954932  |
| CDA | Pericyte                   | STAD | 0.030429394  |
| CDA | Phenylalanine metabolism   | STAD | 0.228276999  |
| CDA | Phenylalanine, tyrosine ar | STAD | 0.111306099  |
| CDA | Phosphonate and phosphir   | STAD | -0.066709584 |
| CDA | Pi3k_akt_activation        | STAD | -0.125340263 |
| CDA | Pi3k_akt_mtor_signaling    | STAD | 0.092108965  |
| CDA | Porphyrin and chlorophyl   | STAD | 0.018963715  |
| CDA | Primary bile acid biosynt  | STAD | 0.117372765  |
| CDA | Propanoate metabolism      | STAD | -0.1738274   |
| CDA | Purine metabolism          | STAD | -0.044112683 |
| CDA | Pyrimidine metabolism      | STAD | 0.015659642  |
| CDA | Pyruvate metabolism        | STAD | -0.060488166 |
| CDA | Regulation_of_autophagy    | STAD | 0.000532135  |
| CDA | Retinol metabolism         | STAD | 0.072489843  |
| CDA | Riboflavin metabolism      | STAD | -0.010242343 |
| CDA | Schmahl_pdgf_signaling     | STAD | 0.105225887  |
| CDA | Selenocompound metabol     | STAD | -0.189255176 |
| CDA | Signaling_by_hippo         | STAD | 0.098090204  |
| CDA | Sphingolipid metabolism    | STAD | 0.014728862  |
| CDA | Starch and sucrose metabo  | STAD | 0.033952695  |
| CDA | Steroid biosynthesis       | STAD | 0.146081519  |
| CDA | Steroid hormone biosynth   | STAD | 0.221720257  |
| CDA | Sulfur metabolism          | STAD | 0.040560395  |
| CDA | Synthesis and degradation  | STAD | -0.103892903 |
| CDA | T helper cell              | STAD | -0.134065626 |
| CDA | T helper1 (th1) cell       | STAD | -0.114754151 |
| CDA | T helper17 (th17) cell     | STAD | -0.10968745  |
| CDA | T helper2 (th2) cell       | STAD | -0.144970594 |
| CDA | T helper9 (th9) cell       | STAD | -0.202186769 |
| CDA | Taurine and hypotaurine r  | STAD | 0.131549163  |
| CDA | Terpenoid backbone biosy   | STAD | 0.023536454  |
| CDA | Tgf_beta_signaling_pathw   | STAD | 0.037608066  |
| CDA | Thiamine metabolism        | STAD | 0.181750433  |
| CDA | Tnfa_signaling_via_nfkb    | STAD | 0.094362467  |

|      |                            |      |              |
|------|----------------------------|------|--------------|
| CDA  | Tryptophan metabolism      | STAD | -0.121840287 |
| CDA  | Tumor endothelial cell     | STAD | 0.302744465  |
| CDA  | Tyrosine metabolism        | STAD | 0.082802456  |
| CDA  | Ubiquinone and other terp  | STAD | 0.057411504  |
| CDA  | Valine, leucine and isoleu | STAD | -0.001798864 |
| CDA  | Valine, leucine and isoleu | STAD | -0.192645196 |
| CDA  | Vascular endothelial cell  | STAD | -0.019601337 |
| CDA  | Vascular smooth muscle c   | STAD | 0.087393814  |
| CDA  | Vegf_signaling_pathway     | STAD | 0.075081502  |
| CDA  | Vitamin b6 metabolism      | STAD | 0.054918347  |
| CDA  | Willert_wnt_signaling      | STAD | 0.112516625  |
| CDA  | Wnt_beta_catenin_signali   | STAD | 0.061380231  |
| UCK1 | Abnormal plasma cell       | STAD | 0.040429396  |
| UCK1 | Activated b cell           | STAD | 0.0149055    |
| UCK1 | Activated cd4+ t cell      | STAD | -0.093329582 |
| UCK1 | Activated t cell           | STAD | -0.065856789 |
| UCK1 | Alanine, aspartate and glu | STAD | -0.070725752 |
| UCK1 | Alcala_apoptosis           | STAD | -0.039048945 |
| UCK1 | Alpha-linolenic acid meta  | STAD | -0.111314016 |
| UCK1 | Amino sugar and nucleoti   | STAD | 0.035658403  |
| UCK1 | Ampk_pathway               | STAD | 0.136609877  |
| UCK1 | Angiogenesis               | STAD | 0.040024224  |
| UCK1 | Arachidonic acid metabol   | STAD | -0.067327594 |
| UCK1 | Arginine and proline meta  | STAD | -0.005936944 |
| UCK1 | Arginine biosynthesis      | STAD | -0.188663083 |
| UCK1 | Ascorbate and aldarate me  | STAD | -0.225294716 |
| UCK1 | Atypical memory b cell     | STAD | -0.034027308 |
| UCK1 | Axl+siglec6+ dendritic ce  | STAD | -0.014884529 |
| UCK1 | B cell                     | STAD | -0.096547214 |
| UCK1 | B1 cell                    | STAD | 0.027593363  |
| UCK1 | Basal cell                 | STAD | -0.104661135 |
| UCK1 | Beta-alanine metabolism    | STAD | -0.086431945 |
| UCK1 | Biosynthesis of unsaturate | STAD | -0.049804087 |
| UCK1 | Biotin metabolism          | STAD | -0.154641276 |
| UCK1 | Butanoate metabolism       | STAD | -0.11858043  |
| UCK1 | Caffeine metabolism        | STAD | -0.329024571 |
| UCK1 | Cancer stem cell           | STAD | -0.132604281 |
| UCK1 | Cancer stem-like cell      | STAD | -0.176476279 |
| UCK1 | Cd4+ cytotoxic t cell      | STAD | -0.022208336 |
| UCK1 | Cd4+ memory t cell         | STAD | -0.033498943 |
| UCK1 | Cd4+ regulatory t cell     | STAD | 0.008845592  |
| UCK1 | Cd4+ t helper cell         | STAD | -0.051321086 |
| UCK1 | Cd4+cd25+ regulatory t c   | STAD | -0.054921961 |

|      |                              |      |              |
|------|------------------------------|------|--------------|
| UCK1 | Cd8+ cytotoxic t cell        | STAD | -0.060960722 |
| UCK1 | Cd8+ regulatory t cell       | STAD | -0.074580022 |
| UCK1 | Cell_cycle                   | STAD | -0.116523785 |
| UCK1 | Chandran_metastasis_top5     | STAD | -0.198535174 |
| UCK1 | Citrate cycle (tca cycle)    | STAD | -0.053067875 |
| UCK1 | Cysteine and methionine r    | STAD | -0.149405637 |
| UCK1 | Cytokine induced killer c    | STAD | 0.048294417  |
| UCK1 | D-arginine and d-ornithin    | STAD | -0.016766455 |
| UCK1 | D-glutamine and d-glutan     | STAD | -0.240666053 |
| UCK1 | Dendritic cell               | STAD | -0.055216499 |
| UCK1 | Dna_repair                   | STAD | 0.091211638  |
| UCK1 | Dna_replication              | STAD | -0.039132629 |
| UCK1 | Double-negative memory       | STAD | 0.0090001    |
| UCK1 | Drug metabolism - cytoch     | STAD | -0.243116551 |
| UCK1 | Drug metabolism - other c    | STAD | -0.141660217 |
| UCK1 | E2f_targets                  | STAD | -0.115633009 |
| UCK1 | Ecm_receptor_interaction     | STAD | -0.013728569 |
| UCK1 | Effector cd4+ memory t (     | STAD | -0.094665363 |
| UCK1 | Effector cd8+ memory t (     | STAD | -0.032109073 |
| UCK1 | Effector memory t cell       | STAD | -0.060073525 |
| UCK1 | Effector regulatory t (treg  | STAD | -0.057868935 |
| UCK1 | Elvidge_hif1a_targets_up     | STAD | -0.095299981 |
| UCK1 | Endothelial cell             | STAD | -0.028336298 |
| UCK1 | Eosinophil                   | STAD | -0.081457191 |
| UCK1 | Ether lipid metabolism       | STAD | -0.248103219 |
| UCK1 | Exhausted cd4+ t cell        | STAD | -0.116208445 |
| UCK1 | Exhausted cd8+ t cell        | STAD | -0.072857274 |
| UCK1 | Exhausted t cell             | STAD | -0.048703622 |
| UCK1 | Fat cell (adipocyte)         | STAD | 0.200760746  |
| UCK1 | Fatty acid biosynthesis      | STAD | -0.086896    |
| UCK1 | Fatty acid degradation       | STAD | -0.206982032 |
| UCK1 | Fatty acid elongation        | STAD | 0.0672143    |
| UCK1 | Fibroblast                   | STAD | 0.027368698  |
| UCK1 | Folate biosynthesis          | STAD | 0.011688639  |
| UCK1 | Follicular b cell            | STAD | -0.03380711  |
| UCK1 | Follicular dendritic cell    | STAD | -0.071838796 |
| UCK1 | Follicular helper (tfh) t ce | STAD | -0.02280042  |
| UCK1 | Follicular t cell            | STAD | 0.042846414  |
| UCK1 | Foxp3+il-17+ t cell          | STAD | 0.000445634  |
| UCK1 | Fructose and mannose me      | STAD | -0.125654845 |
| UCK1 | G2m_checkpoint               | STAD | -0.163860757 |
| UCK1 | Galactose metabolism         | STAD | -0.086018662 |
| UCK1 | Galie_tumor_stemness_ge      | STAD | 0.00407208   |

|      |                                          |      |              |
|------|------------------------------------------|------|--------------|
| UCK1 | Glutathione metabolism                   | STAD | -0.095686136 |
| UCK1 | Glycerolipid metabolism                  | STAD | -0.240666435 |
| UCK1 | Glycerophospholipid metabolism           | STAD | -0.144024381 |
| UCK1 | Glycine, serine and threonine metabolism | STAD | 0.093774247  |
| UCK1 | Glycolysis / gluconeogenesis             | STAD | -0.153110942 |
| UCK1 | Glycosaminoglycan biosynthesis           | STAD | 0.292231951  |
| UCK1 | Glycosaminoglycan biosynthesis           | STAD | 0.182198925  |
| UCK1 | Glycosaminoglycan biosynthesis           | STAD | 0.001247402  |
| UCK1 | Glycosaminoglycan degradation            | STAD | 0.02372362   |
| UCK1 | Glycosphingolipid biosynthesis           | STAD | 0.207110809  |
| UCK1 | Glycosphingolipid biosynthesis           | STAD | 0.037431471  |
| UCK1 | Glycosphingolipid biosynthesis           | STAD | -0.015305367 |
| UCK1 | Glycosylphosphatidylinositol signaling   | STAD | 0.024191713  |
| UCK1 | Glyoxylate and dicarboxylate metabolism  | STAD | 0.011005813  |
| UCK1 | Granulocyte                              | STAD | -0.104704625 |
| UCK1 | Hedgehog signaling                       | STAD | 0.130449491  |
| UCK1 | Histidine metabolism                     | STAD | -0.138442501 |
| UCK1 | Hypoxia                                  | STAD | 0.053716382  |
| UCK1 | Il-17 receptor signaling in T cells      | STAD | -0.067293054 |
| UCK1 | Il2_stat5_signaling                      | STAD | -0.109174355 |
| UCK1 | Il6_jak_stat3_signaling                  | STAD | -0.094562753 |
| UCK1 | Immune checkpoints                       | STAD | -0.118492507 |
| UCK1 | Immune inhibition                        | STAD | -0.076904857 |
| UCK1 | Inositol phosphate metabolism            | STAD | -0.240991367 |
| UCK1 | Interleukin_6_signaling                  | STAD | -0.161942542 |
| UCK1 | Jaeger metastasis up                     | STAD | -0.02012737  |
| UCK1 | Jain_nfkB_signaling                      | STAD | -0.136959335 |
| UCK1 | Kras signaling up                        | STAD | -0.145917531 |
| UCK1 | Linoleic acid metabolism                 | STAD | -0.185709718 |
| UCK1 | Lipoic acid metabolism                   | STAD | 0.039361357  |
| UCK1 | Lysine degradation                       | STAD | 6.42E-05     |
| UCK1 | Lysosome                                 | STAD | -0.016075716 |
| UCK1 | M1 macrophage                            | STAD | -0.051290375 |
| UCK1 | M2 macrophage                            | STAD | -0.029907478 |
| UCK1 | Mannose type o-glycan biosynthesis       | STAD | 0.259524648  |
| UCK1 | Mapk signaling pathway                   | STAD | 0.021018622  |
| UCK1 | Mapk3_erk1_activation                    | STAD | -0.239035256 |
| UCK1 | Marginal zone b cell                     | STAD | -0.072514012 |
| UCK1 | Memory b cell                            | STAD | -0.09353581  |
| UCK1 | Mesenchymal cell                         | STAD | 0.138138031  |
| UCK1 | Mesenchymal stem cell                    | STAD | -0.00598372  |
| UCK1 | Metabolism of xenobiotics                | STAD | -0.201690071 |
| UCK1 | Migrating cancer stem cell               | STAD | -0.280417976 |

|      |                                                   |      |              |
|------|---------------------------------------------------|------|--------------|
| UCK1 | Mitotic_spindle                                   | STAD | -0.24355969  |
| UCK1 | Monocyte                                          | STAD | -0.093192764 |
| UCK1 | Mtor_signaling_pathway                            | STAD | 0.017997333  |
| UCK1 | Mtorc1_signaling                                  | STAD | -0.148564853 |
| UCK1 | Mucin type o-glycan biosynthesis                  | STAD | -0.297534731 |
| UCK1 | Myc_targets_v1                                    | STAD | -0.066122102 |
| UCK1 | Myeloid cell                                      | STAD | -0.086085521 |
| UCK1 | N-glycan biosynthesis                             | STAD | 0.088172772  |
| UCK1 | Naive b cell                                      | STAD | -0.033482086 |
| UCK1 | Naive cd4+ t cell                                 | STAD | -0.00931803  |
| UCK1 | Naive cd8+ t cell                                 | STAD | -0.022770959 |
| UCK1 | Natural killer cell                               | STAD | -0.080532043 |
| UCK1 | Natural killer t (nkt) cell                       | STAD | -0.124382306 |
| UCK1 | Natural regulatory t (treg) cell                  | STAD | -0.074473653 |
| UCK1 | Neomycin, kanamycin and streptomycin              | STAD | -0.021757131 |
| UCK1 | Neutrophil                                        | STAD | -0.139709063 |
| UCK1 | Nicotinate and nicotinamide metabolism            | STAD | -0.034880665 |
| UCK1 | Nitrogen metabolism                               | STAD | -0.26980024  |
| UCK1 | Nod_like_receptor_signaling_pathway               | STAD | -0.177112647 |
| UCK1 | Notch_signaling                                   | STAD | -0.033138458 |
| UCK1 | One carbon pool by folate                         | STAD | -0.124857325 |
| UCK1 | Other glycan degradation                          | STAD | -0.031191517 |
| UCK1 | Other types of o-glycan biosynthesis              | STAD | 0.365858403  |
| UCK1 | Oxidative phosphorylation                         | STAD | 0.052480281  |
| UCK1 | P53_pathway                                       | STAD | -0.079465957 |
| UCK1 | P53_signaling_pathway                             | STAD | -0.29583989  |
| UCK1 | Pantothenate and coenzyme a biosynthesis          | STAD | -0.057485442 |
| UCK1 | Pentose and glucuronate interconversions          | STAD | -0.204227545 |
| UCK1 | Pentose phosphate pathway                         | STAD | -0.051575765 |
| UCK1 | Pericyte                                          | STAD | 0.035164736  |
| UCK1 | Phenylalanine metabolism                          | STAD | 0.012725541  |
| UCK1 | Phenylalanine, tyrosine and tryptophan metabolism | STAD | -0.020557126 |
| UCK1 | Phosphonate and phosphite metabolism              | STAD | -0.025098271 |
| UCK1 | Pi3k_akt_activation                               | STAD | -0.112411797 |
| UCK1 | Pi3k_akt_mtor_signaling                           | STAD | -0.0874598   |
| UCK1 | Porphyrin and chlorophyll metabolism              | STAD | -0.081405998 |
| UCK1 | Primary bile acid biosynthesis                    | STAD | -0.002092664 |
| UCK1 | Propanoate metabolism                             | STAD | -0.208821927 |
| UCK1 | Purine metabolism                                 | STAD | -0.002492876 |
| UCK1 | Pyrimidine metabolism                             | STAD | 0.011949042  |
| UCK1 | Pyruvate metabolism                               | STAD | -0.131057957 |
| UCK1 | Regulation_of_autophagy                           | STAD | -0.009888772 |
| UCK1 | Retinol metabolism                                | STAD | -0.281026188 |

|      |                            |      |              |
|------|----------------------------|------|--------------|
| UCK1 | Riboflavin metabolism      | STAD | 0.072497563  |
| UCK1 | Schmahl_pdgf_signaling     | STAD | -0.144775313 |
| UCK1 | Selenocompound metabol     | STAD | -0.108371    |
| UCK1 | Signaling_by_hippo         | STAD | -0.082520761 |
| UCK1 | Sphingolipid metabolism    | STAD | -0.260685587 |
| UCK1 | Starch and sucrose metabo  | STAD | -0.141471362 |
| UCK1 | Steroid biosynthesis       | STAD | -0.026138389 |
| UCK1 | Steroid hormone biosynth   | STAD | -0.167533876 |
| UCK1 | Sulfur metabolism          | STAD | -0.178519366 |
| UCK1 | Synthesis and degradation  | STAD | -0.149235524 |
| UCK1 | T helper cell              | STAD | -0.079732005 |
| UCK1 | T helper1 (th1) cell       | STAD | -0.148754584 |
| UCK1 | T helper17 (th17) cell     | STAD | -0.0856455   |
| UCK1 | T helper2 (th2) cell       | STAD | -0.055388944 |
| UCK1 | T helper9 (th9) cell       | STAD | -0.021689461 |
| UCK1 | Taurine and hypotaurine r  | STAD | 0.087468639  |
| UCK1 | Terpenoid backbone biosy   | STAD | -0.097410832 |
| UCK1 | Tgf_beta_signaling_pathw   | STAD | -0.07926996  |
| UCK1 | Thiamine metabolism        | STAD | 0.077719827  |
| UCK1 | Tnfa_signaling_via_nfkb    | STAD | -0.114672153 |
| UCK1 | Tryptophan metabolism      | STAD | -0.064044296 |
| UCK1 | Tumor endothelial cell     | STAD | -0.005320479 |
| UCK1 | Tyrosine metabolism        | STAD | -0.018385428 |
| UCK1 | Ubiquinone and other ter   | STAD | 0.099511246  |
| UCK1 | Valine, leucine and isoleu | STAD | 0.09120215   |
| UCK1 | Valine, leucine and isoleu | STAD | -0.125227601 |
| UCK1 | Vascular endothelial cell  | STAD | 0.064823448  |
| UCK1 | Vascular smooth muscle c   | STAD | 0.04161241   |
| UCK1 | Vegf_signaling_pathway     | STAD | -0.105921894 |
| UCK1 | Vitamin b6 metabolism      | STAD | -0.001688402 |
| UCK1 | Willert_wnt_signaling      | STAD | -0.09492222  |
| UCK1 | Wnt_beta_catenin_signali   | STAD | 0.175797212  |
| UCK2 | Abnormal plasma cell       | STAD | -0.287580349 |
| UCK2 | Activated b cell           | STAD | -0.234019864 |
| UCK2 | Activated cd4+ t cell      | STAD | -0.275079355 |
| UCK2 | Activated t cell           | STAD | -0.252326778 |
| UCK2 | Alanine, aspartate and glu | STAD | 0.386941387  |
| UCK2 | Alcala_apoptosis           | STAD | 0.380279176  |
| UCK2 | Alpha-linolenic acid meta  | STAD | -0.057884524 |
| UCK2 | Amino sugar and nucleoti   | STAD | 0.380414748  |
| UCK2 | Ampk_pathway               | STAD | 0.233491393  |
| UCK2 | Angiogenesis               | STAD | -0.170853331 |
| UCK2 | Arachidonic acid metabo    | STAD | -0.158479183 |



|      |                                         |      |              |
|------|-----------------------------------------|------|--------------|
| UCK2 | Arginine and proline metabolism         | STAD | 0.356720441  |
| UCK2 | Arginine biosynthesis                   | STAD | 0.229660056  |
| UCK2 | Ascorbate and aldarate metabolism       | STAD | 0.097576609  |
| UCK2 | Atypical memory B cell                  | STAD | -0.236712481 |
| UCK2 | Axl+siglec6+ dendritic cell             | STAD | -0.456489928 |
| UCK2 | B cell                                  | STAD | -0.347670281 |
| UCK2 | B1 cell                                 | STAD | -0.203378175 |
| UCK2 | Basal cell                              | STAD | -0.032688494 |
| UCK2 | Beta-alanine metabolism                 | STAD | 0.040870071  |
| UCK2 | Biosynthesis of unsaturated fatty acids | STAD | 0.205763603  |
| UCK2 | Biotin metabolism                       | STAD | 0.277796454  |
| UCK2 | Butanoate metabolism                    | STAD | 0.267770598  |
| UCK2 | Caffeine metabolism                     | STAD | 0.048195807  |
| UCK2 | Cancer stem cell                        | STAD | -0.361664175 |
| UCK2 | Cancer stem-like cell                   | STAD | -0.135930395 |
| UCK2 | Cd4+ cytotoxic T cell                   | STAD | -0.336356388 |
| UCK2 | Cd4+ memory T cell                      | STAD | -0.320138439 |
| UCK2 | Cd4+ regulatory T cell                  | STAD | -0.201163219 |
| UCK2 | Cd4+ T helper cell                      | STAD | -0.322764919 |
| UCK2 | Cd4+cd25+ regulatory T cell             | STAD | -0.29963025  |
| UCK2 | Cd8+ cytotoxic T cell                   | STAD | -0.163079982 |
| UCK2 | Cd8+ regulatory T cell                  | STAD | -0.245943058 |
| UCK2 | Cell cycle                              | STAD | 0.495008132  |
| UCK2 | Chandran_metastasis_top50               | STAD | 0.379723386  |
| UCK2 | Citrate cycle (TCA cycle)               | STAD | 0.428765003  |
| UCK2 | Cysteine and methionine metabolism      | STAD | 0.513528817  |
| UCK2 | Cytokine induced killer cell            | STAD | -0.367176098 |
| UCK2 | D-arginine and D-ornithine              | STAD | 0.132233349  |
| UCK2 | D-glutamine and D-glutamate             | STAD | 0.073413799  |
| UCK2 | Dendritic cell                          | STAD | -0.390667599 |
| UCK2 | DNA repair                              | STAD | 0.587780121  |
| UCK2 | DNA replication                         | STAD | 0.592368053  |
| UCK2 | Double-negative memory T cell           | STAD | -0.229058353 |
| UCK2 | Drug metabolism - cytochrome P450       | STAD | -0.141494111 |
| UCK2 | Drug metabolism - other                 | STAD | 0.438820337  |
| UCK2 | E2f targets                             | STAD | 0.588353803  |
| UCK2 | ECM receptor interaction                | STAD | -0.411723717 |
| UCK2 | Effector CD4+ memory T cell             | STAD | -0.398489187 |
| UCK2 | Effector CD8+ memory T cell             | STAD | -0.365980341 |
| UCK2 | Effector memory T cell                  | STAD | -0.358777032 |
| UCK2 | Effector regulatory T cell (Treg)       | STAD | -0.295999155 |
| UCK2 | Elvidge_hif1a_targets_up                | STAD | 0.51061465   |
| UCK2 | Endothelial cell                        | STAD | -0.439399768 |

|      |                              |      |              |
|------|------------------------------|------|--------------|
| UCK2 | Eosinophil                   | STAD | -0.279207249 |
| UCK2 | Ether lipid metabolism       | STAD | -0.038548023 |
| UCK2 | Exhausted cd4+ t cell        | STAD | -0.400592297 |
| UCK2 | Exhausted cd8+ t cell        | STAD | -0.336174661 |
| UCK2 | Exhausted t cell             | STAD | -0.214922938 |
| UCK2 | Fat cell (adipocyte)         | STAD | 0.056479122  |
| UCK2 | Fatty acid biosynthesis      | STAD | 0.196724632  |
| UCK2 | Fatty acid degradation       | STAD | -0.004531418 |
| UCK2 | Fatty acid elongation        | STAD | 0.35737041   |
| UCK2 | Fibroblast                   | STAD | -0.455512664 |
| UCK2 | Folate biosynthesis          | STAD | 0.359829499  |
| UCK2 | Follicular b cell            | STAD | -0.381739913 |
| UCK2 | Follicular dendritic cell    | STAD | -0.358659962 |
| UCK2 | Follicular helper (tfh) t ce | STAD | -0.289061621 |
| UCK2 | Follicular t cell            | STAD | 0.013143052  |
| UCK2 | Foxp3+il-17+ t cell          | STAD | 0.00894903   |
| UCK2 | Fructose and mannose me      | STAD | 0.342768442  |
| UCK2 | G2m_checkpoint               | STAD | 0.538733664  |
| UCK2 | Galactose metabolism         | STAD | 0.296524376  |
| UCK2 | Galie_tumor_stemness_ge      | STAD | -0.393780629 |
| UCK2 | Glutathione metabolism       | STAD | 0.37119578   |
| UCK2 | Glycerolipid metabolism      | STAD | 0.169759012  |
| UCK2 | Glycerophospholipid met&     | STAD | 0.144733524  |
| UCK2 | Glycine, serine and threor   | STAD | 0.301670979  |
| UCK2 | Glycolysis / gluconeogene    | STAD | 0.310859237  |
| UCK2 | Glycosaminoglycan biosy      | STAD | -0.128822118 |
| UCK2 | Glycosaminoglycan biosy      | STAD | -0.124807259 |
| UCK2 | Glycosaminoglycan biosy      | STAD | 0.130479329  |
| UCK2 | Glycosaminoglycan degra      | STAD | -0.005658061 |
| UCK2 | Glycosphingolipid biosyn     | STAD | -0.184816103 |
| UCK2 | Glycosphingolipid biosyn     | STAD | 0.004457255  |
| UCK2 | Glycosphingolipid biosyn     | STAD | 0.122979572  |
| UCK2 | Glycosylphosphatidylinos     | STAD | 0.469971481  |
| UCK2 | Glyoxylate and dicarboxy     | STAD | 0.453402158  |
| UCK2 | Granulocyte                  | STAD | -0.261306745 |
| UCK2 | Hedgehog_signaling           | STAD | -0.447879421 |
| UCK2 | Histidine metabolism         | STAD | -0.123948329 |
| UCK2 | Hypoxia                      | STAD | -0.089081382 |
| UCK2 | Il-17alpha t cell            | STAD | -0.292558101 |
| UCK2 | Il2_stat5_signaling          | STAD | -0.272089916 |
| UCK2 | Il6_jak_stat3_signaling      | STAD | -0.216236514 |
| UCK2 | Immune_checkpoints_tun       | STAD | -0.123152752 |
| UCK2 | Immune_inhibition_cytok      | STAD | -0.182234413 |

|      |                             |      |              |
|------|-----------------------------|------|--------------|
| UCK2 | Inositol phosphate metabo   | STAD | -0.383996741 |
| UCK2 | Interleukin_6_signaling     | STAD | -0.374048157 |
| UCK2 | Jaeger_metastasis_up        | STAD | 0.299207235  |
| UCK2 | Jain_nfkb_signaling         | STAD | 0.565000064  |
| UCK2 | Kras_signaling_up           | STAD | -0.376398846 |
| UCK2 | Linoleic acid metabolism    | STAD | -0.066271075 |
| UCK2 | Lipoic acid metabolism      | STAD | 0.201999082  |
| UCK2 | Lysine degradation          | STAD | 0.148340184  |
| UCK2 | Lysosome                    | STAD | 0.00160416   |
| UCK2 | M1 macrophage               | STAD | -0.280671932 |
| UCK2 | M2 macrophage               | STAD | -0.277785088 |
| UCK2 | Mannose type o-glycan bi    | STAD | 0.125484913  |
| UCK2 | Mapk_signaling_pathway      | STAD | -0.442296459 |
| UCK2 | Mapk3_erk1_activation       | STAD | -0.211709497 |
| UCK2 | Marginal zone b cell        | STAD | -0.39104948  |
| UCK2 | Memory b cell               | STAD | -0.353283248 |
| UCK2 | Mesenchymal cell            | STAD | -0.354096524 |
| UCK2 | Mesenchymal stem cell       | STAD | -0.455512123 |
| UCK2 | Metabolism of xenobiotic    | STAD | -0.035855595 |
| UCK2 | Migrating cancer stem cel   | STAD | 0.291931142  |
| UCK2 | Mitotic_spindle             | STAD | 0.010625539  |
| UCK2 | Monocyte                    | STAD | -0.267933489 |
| UCK2 | Mtor_signaling_pathway      | STAD | -0.312998309 |
| UCK2 | Mtorc1_signaling            | STAD | 0.558221568  |
| UCK2 | Mucin type o-glycan biosy   | STAD | -0.084387752 |
| UCK2 | Myc_targets_v1              | STAD | 0.617798229  |
| UCK2 | Myeloid cell                | STAD | -0.336412586 |
| UCK2 | N-glycan biosynthesis       | STAD | 0.535326161  |
| UCK2 | Naive b cell                | STAD | -0.189391437 |
| UCK2 | Naive cd4+ t cell           | STAD | -0.46372299  |
| UCK2 | Naive cd8+ t cell           | STAD | -0.449355219 |
| UCK2 | Natural killer cell         | STAD | -0.291901521 |
| UCK2 | Natural killer t (nkt) cell | STAD | 0.115920739  |
| UCK2 | Natural regulatory t (treg) | STAD | -0.336972248 |
| UCK2 | Neomycin, kanamycin and     | STAD | 0.089509503  |
| UCK2 | Neutrophil                  | STAD | -0.085138975 |
| UCK2 | Nicotinate and nicotinami   | STAD | -0.178523639 |
| UCK2 | Nitrogen metabolism         | STAD | -0.069833499 |
| UCK2 | Nod_like_receptor_signal    | STAD | -0.14957864  |
| UCK2 | Notch_signaling             | STAD | -0.018884014 |
| UCK2 | One carbon pool by folate   | STAD | 0.495356612  |
| UCK2 | Other glycan degradation    | STAD | 0.167195206  |
| UCK2 | Other types of o-glycan b   | STAD | 0.14579993   |

|      |                                                   |      |              |
|------|---------------------------------------------------|------|--------------|
| UCK2 | Oxidative phosphorylation                         | STAD | 0.375194601  |
| UCK2 | P53_pathway                                       | STAD | 0.11101973   |
| UCK2 | P53_signaling_pathway                             | STAD | 0.200362894  |
| UCK2 | Pantothenate and coa biosynthesis                 | STAD | 0.206166572  |
| UCK2 | Pentose and glucuronate interconversions          | STAD | 0.255148238  |
| UCK2 | Pentose phosphate pathway                         | STAD | 0.503219391  |
| UCK2 | Pericyte                                          | STAD | -0.436892344 |
| UCK2 | Phenylalanine metabolism                          | STAD | 0.072932342  |
| UCK2 | Phenylalanine, tyrosine and tryptophan metabolism | STAD | 0.384487824  |
| UCK2 | Phosphonate and phosphite metabolism              | STAD | 0.222690882  |
| UCK2 | Pi3k_akt_activation                               | STAD | -0.253479428 |
| UCK2 | Pi3k_akt_mtor_signaling                           | STAD | 0.128088703  |
| UCK2 | Porphyrin and chlorophyll metabolism              | STAD | 0.365614493  |
| UCK2 | Primary bile acid biosynthesis                    | STAD | -0.153052424 |
| UCK2 | Propanoate metabolism                             | STAD | 0.126377635  |
| UCK2 | Purine metabolism                                 | STAD | 0.603426807  |
| UCK2 | Pyrimidine metabolism                             | STAD | 0.648821766  |
| UCK2 | Pyruvate metabolism                               | STAD | 0.353464055  |
| UCK2 | Regulation_of_autophagy                           | STAD | -0.261463252 |
| UCK2 | Retinol metabolism                                | STAD | -0.051860907 |
| UCK2 | Riboflavin metabolism                             | STAD | 0.46910312   |
| UCK2 | Schmahl_pdgf_signaling                            | STAD | -0.393335352 |
| UCK2 | Selenocompound metabolism                         | STAD | 0.391010575  |
| UCK2 | Signaling_by_hippo                                | STAD | -0.176222087 |
| UCK2 | Sphingolipid metabolism                           | STAD | 0.179870573  |
| UCK2 | Starch and sucrose metabolism                     | STAD | -0.144829995 |
| UCK2 | Steroid biosynthesis                              | STAD | 0.468255126  |
| UCK2 | Steroid hormone biosynthesis                      | STAD | 0.083794895  |
| UCK2 | Sulfur metabolism                                 | STAD | 0.305627144  |
| UCK2 | Synthesis and degradation of ribonucleotides      | STAD | 0.184770261  |
| UCK2 | T helper cell                                     | STAD | -0.370483382 |
| UCK2 | T helper1 (th1) cell                              | STAD | -0.177350316 |
| UCK2 | T helper17 (th17) cell                            | STAD | -0.234246835 |
| UCK2 | T helper2 (th2) cell                              | STAD | -0.329143331 |
| UCK2 | T helper9 (th9) cell                              | STAD | -0.292016279 |
| UCK2 | Taurine and hypotaurine metabolism                | STAD | -0.123337188 |
| UCK2 | Terpenoid backbone biosynthesis                   | STAD | 0.474285856  |
| UCK2 | Tgf_beta_signaling_pathway                        | STAD | -0.438305717 |
| UCK2 | Thiamine metabolism                               | STAD | 0.378064853  |
| UCK2 | Tnfa_signaling_via_nfkB                           | STAD | -0.132923257 |
| UCK2 | Tryptophan metabolism                             | STAD | -0.028014601 |
| UCK2 | Tumor endothelial cell                            | STAD | -0.004642564 |
| UCK2 | Tyrosine metabolism                               | STAD | -0.085861663 |

|       |                            |      |              |
|-------|----------------------------|------|--------------|
| UCK2  | Ubiquinone and other ter   | STAD | 0.41801428   |
| UCK2  | Valine, leucine and isoleu | STAD | 0.212396225  |
| UCK2  | Valine, leucine and isoleu | STAD | 0.226826299  |
| UCK2  | Vascular endothelial cell  | STAD | -0.303316643 |
| UCK2  | Vascular smooth muscle c   | STAD | -0.44921957  |
| UCK2  | Vegf_signaling_pathway     | STAD | -0.153994038 |
| UCK2  | Vitamin b6 metabolism      | STAD | 0.326736943  |
| UCK2  | Willert_wnt_signaling      | STAD | 0.157063232  |
| UCK2  | Wnt_beta_catenin_signali   | STAD | -0.055046941 |
| UCKL1 | Abnormal plasma cell       | STAD | -0.309745482 |
| UCKL1 | Activated b cell           | STAD | -0.207415681 |
| UCKL1 | Activated cd4+ t cell      | STAD | -0.260779793 |
| UCKL1 | Activated t cell           | STAD | -0.26199224  |
| UCKL1 | Alanine, aspartate and glu | STAD | 0.169809542  |
| UCKL1 | Alcala_apoptosis           | STAD | 0.032061403  |
| UCKL1 | Alpha-linolenic acid meta  | STAD | -0.092787382 |
| UCKL1 | Amino sugar and nucleoti   | STAD | -0.031414351 |
| UCKL1 | Ampk_pathway               | STAD | 0.258646884  |
| UCKL1 | Angiogenesis               | STAD | -0.313144481 |
| UCKL1 | Arachidonic acid metaboli  | STAD | -0.255400009 |
| UCKL1 | Arginine and proline metæ  | STAD | -0.022393427 |
| UCKL1 | Arginine biosynthesis      | STAD | 0.033398548  |
| UCKL1 | Ascorbate and aldarate mε  | STAD | -0.049535884 |
| UCKL1 | Atypical memory b cell     | STAD | -0.184588722 |
| UCKL1 | Ax1+siglec6+ dendritic ce  | STAD | -0.424371534 |
| UCKL1 | B cell                     | STAD | -0.316672302 |
| UCKL1 | B1 cell                    | STAD | -0.128074177 |
| UCKL1 | Basal cell                 | STAD | -0.136778095 |
| UCKL1 | Beta-alanine metabolism    | STAD | -0.25511543  |
| UCKL1 | Biosynthesis of unsaturate | STAD | 0.018646384  |
| UCKL1 | Biotin metabolism          | STAD | 0.016389874  |
| UCKL1 | Butanoate metabolism       | STAD | 0.013585244  |
| UCKL1 | Caffeine metabolism        | STAD | -0.054273295 |
| UCKL1 | Cancer stem cell           | STAD | -0.288047453 |
| UCKL1 | Cancer stem-like cell      | STAD | -0.168487976 |
| UCKL1 | Cd4+ cytotoxic t cell      | STAD | -0.361872832 |
| UCKL1 | Cd4+ memory t cell         | STAD | -0.256793492 |
| UCKL1 | Cd4+ regulatory t cell     | STAD | -0.216006118 |
| UCKL1 | Cd4+ t helper cell         | STAD | -0.263734288 |
| UCKL1 | Cd4+cd25+ regulatory t c   | STAD | -0.258115681 |
| UCKL1 | Cd8+ cytotoxic t cell      | STAD | -0.200225446 |
| UCKL1 | Cd8+ regulatory t cell     | STAD | -0.254836075 |
| UCKL1 | Cell_cycle                 | STAD | 0.293000316  |

|       |                             |      |              |
|-------|-----------------------------|------|--------------|
| UCKL1 | Chandran_metastasis_top     | STAD | 0.275655989  |
| UCKL1 | Citrate cycle (tca cycle)   | STAD | 0.177867519  |
| UCKL1 | Cysteine and methionine     | STAD | 0.224702673  |
| UCKL1 | Cytokine induced killer     | STAD | -0.296996357 |
| UCKL1 | D-arginine and d-ornithin   | STAD | 0.164832807  |
| UCKL1 | D-glutamine and d-glutan    | STAD | 0.155551896  |
| UCKL1 | Dendritic cell              | STAD | -0.355078369 |
| UCKL1 | Dna_repair                  | STAD | 0.255150202  |
| UCKL1 | Dna_replication             | STAD | 0.306525505  |
| UCKL1 | Double-negative memory      | STAD | -0.197701017 |
| UCKL1 | Drug metabolism - cytoch    | STAD | -0.174932622 |
| UCKL1 | Drug metabolism - other     | STAD | 0.082842955  |
| UCKL1 | E2f_targets                 | STAD | 0.352467078  |
| UCKL1 | Ecm_receptor_interaction    | STAD | -0.381598942 |
| UCKL1 | Effector cd4+ memory t      | STAD | -0.28729681  |
| UCKL1 | Effector cd8+ memory t      | STAD | -0.358529592 |
| UCKL1 | Effector memory t cell      | STAD | -0.302354958 |
| UCKL1 | Effector regulatory t (treg | STAD | -0.248630968 |
| UCKL1 | Elvidge_hif1a_targets_up    | STAD | 0.128730692  |
| UCKL1 | Endothelial cell            | STAD | -0.384014553 |
| UCKL1 | Eosinophil                  | STAD | -0.331322013 |
| UCKL1 | Ether lipid metabolism      | STAD | -0.112684122 |
| UCKL1 | Exhausted cd4+ t cell       | STAD | -0.396782682 |
| UCKL1 | Exhausted cd8+ t cell       | STAD | -0.359473432 |
| UCKL1 | Exhausted t cell            | STAD | -0.202930875 |
| UCKL1 | Fat cell (adipocyte)        | STAD | -0.041648722 |
| UCKL1 | Fatty acid biosynthesis     | STAD | -0.053936832 |
| UCKL1 | Fatty acid degradation      | STAD | -0.172398757 |
| UCKL1 | Fatty acid elongation       | STAD | 0.009328784  |
| UCKL1 | Fibroblast                  | STAD | -0.381628347 |
| UCKL1 | Folate biosynthesis         | STAD | 0.010012434  |
| UCKL1 | Follicular b cell           | STAD | -0.291108589 |
| UCKL1 | Follicular dendritic cell   | STAD | -0.277460657 |
| UCKL1 | Follicular helper (tfh) t   | STAD | -0.259699462 |
| UCKL1 | Follicular t cell           | STAD | -0.064693012 |
| UCKL1 | Foxp3+il-17+ t cell         | STAD | -0.018882635 |
| UCKL1 | Fructose and mannose me     | STAD | 0.028901071  |
| UCKL1 | G2m_checkpoint              | STAD | 0.34131836   |
| UCKL1 | Galactose metabolism        | STAD | 0.007243897  |
| UCKL1 | Galie_tumor_stemness_ge     | STAD | -0.27889887  |
| UCKL1 | Glutathione metabolism      | STAD | 0.010963096  |
| UCKL1 | Glycerolipid metabolism     | STAD | -0.024036895 |
| UCKL1 | Glycerophospholipid met     | STAD | 0.070667481  |

|       |                            |      |              |
|-------|----------------------------|------|--------------|
| UCKL1 | Glycine, serine and threon | STAD | 0.086673727  |
| UCKL1 | Glycolysis / gluconeogene  | STAD | 0.029645683  |
| UCKL1 | Glycosaminoglycan biosyn   | STAD | -0.21535029  |
| UCKL1 | Glycosaminoglycan biosyn   | STAD | -0.139183206 |
| UCKL1 | Glycosaminoglycan biosyn   | STAD | -0.127538733 |
| UCKL1 | Glycosaminoglycan degra    | STAD | -0.26144531  |
| UCKL1 | Glycosphingolipid biosyn   | STAD | -0.392800977 |
| UCKL1 | Glycosphingolipid biosyn   | STAD | -0.225955319 |
| UCKL1 | Glycosphingolipid biosyn   | STAD | -0.144865064 |
| UCKL1 | Glycosylphosphatidylinos   | STAD | 0.283844438  |
| UCKL1 | Glyoxylate and dicarboxy   | STAD | 0.198542052  |
| UCKL1 | Granulocyte                | STAD | -0.32335031  |
| UCKL1 | Hedgehog_signaling         | STAD | -0.251565006 |
| UCKL1 | Histidine metabolism       | STAD | -0.270468559 |
| UCKL1 | Hypoxia                    | STAD | -0.270697329 |
| UCKL1 | Il-17alpha t cell          | STAD | -0.246944453 |
| UCKL1 | Il2_stat5_signaling        | STAD | -0.426393829 |
| UCKL1 | Il6_jak_stat3_signaling    | STAD | -0.374901926 |
| UCKL1 | Immune_checkpoints_tun     | STAD | -0.352262523 |
| UCKL1 | Immune_inhibition_cytok    | STAD | -0.287493927 |
| UCKL1 | Inositol phosphate metabo  | STAD | -0.290764439 |
| UCKL1 | Interleukin_6_signaling    | STAD | -0.350695988 |
| UCKL1 | Jaeger_metastasis_up       | STAD | 0.029838392  |
| UCKL1 | Jain_nfkb_signaling        | STAD | 0.355751516  |
| UCKL1 | Kras_signaling_up          | STAD | -0.437292031 |
| UCKL1 | Linoleic acid metabolism   | STAD | -0.026538531 |
| UCKL1 | Lipoic acid metabolism     | STAD | 0.1158381    |
| UCKL1 | Lysine degradation         | STAD | 0.101279904  |
| UCKL1 | Lysosome                   | STAD | -0.240760827 |
| UCKL1 | M1 macrophage              | STAD | -0.33272548  |
| UCKL1 | M2 macrophage              | STAD | -0.325660502 |
| UCKL1 | Mannose type o-glycan bi   | STAD | 0.105797912  |
| UCKL1 | Mapk_signaling_pathway     | STAD | -0.424481339 |
| UCKL1 | Mapk3_erk1_activation      | STAD | -0.372814693 |
| UCKL1 | Marginal zone b cell       | STAD | -0.279995059 |
| UCKL1 | Memory b cell              | STAD | -0.330847129 |
| UCKL1 | Mesenchymal cell           | STAD | -0.340168467 |
| UCKL1 | Mesenchymal stem cell      | STAD | -0.376149028 |
| UCKL1 | Metabolism of xenobiotic   | STAD | -0.158163055 |
| UCKL1 | Migrating cancer stem cel  | STAD | 0.042635093  |
| UCKL1 | Mitotic_spindle            | STAD | 0.077933742  |
| UCKL1 | Monocyte                   | STAD | -0.375388085 |
| UCKL1 | Mtor_signaling_pathway     | STAD | -0.258062978 |

|       |                                                   |      |              |
|-------|---------------------------------------------------|------|--------------|
| UCKL1 | Mtorc1_signaling                                  | STAD | 0.14201218   |
| UCKL1 | Mucin type o-glycan biosynthesis                  | STAD | -0.29852559  |
| UCKL1 | Myc_targets_v1                                    | STAD | 0.292863151  |
| UCKL1 | Myeloid cell                                      | STAD | -0.333937998 |
| UCKL1 | N-glycan biosynthesis                             | STAD | 0.185341045  |
| UCKL1 | Naive b cell                                      | STAD | -0.178649186 |
| UCKL1 | Naive cd4+ t cell                                 | STAD | -0.333652473 |
| UCKL1 | Naive cd8+ t cell                                 | STAD | -0.247362408 |
| UCKL1 | Natural killer cell                               | STAD | -0.299539307 |
| UCKL1 | Natural killer t (nkt) cell                       | STAD | -0.019082829 |
| UCKL1 | Natural regulatory t (treg) cell                  | STAD | -0.274220212 |
| UCKL1 | Neomycin, kanamycin and streptomycin              | STAD | -0.093720349 |
| UCKL1 | Neutrophil                                        | STAD | -0.276900097 |
| UCKL1 | Nicotinate and nicotinamide metabolism            | STAD | -0.282556781 |
| UCKL1 | Nitrogen metabolism                               | STAD | -0.111618435 |
| UCKL1 | Nod_like_receptor_signaling                       | STAD | -0.273332222 |
| UCKL1 | Notch_signaling                                   | STAD | -0.231001197 |
| UCKL1 | One carbon pool by folate                         | STAD | 0.197535806  |
| UCKL1 | Other glycan degradation                          | STAD | -0.016341916 |
| UCKL1 | Other types of o-glycan biosynthesis              | STAD | 0.268671573  |
| UCKL1 | Oxidative phosphorylation                         | STAD | 0.029206652  |
| UCKL1 | P53_pathway                                       | STAD | -0.179446737 |
| UCKL1 | P53_signaling_pathway                             | STAD | -0.073479866 |
| UCKL1 | Pantothenate and coenzyme a biosynthesis          | STAD | 0.027250123  |
| UCKL1 | Pentose and glucuronate interconversions          | STAD | 0.037660615  |
| UCKL1 | Pentose phosphate pathway                         | STAD | 0.159261657  |
| UCKL1 | Pericyte                                          | STAD | -0.312651438 |
| UCKL1 | Phenylalanine metabolism                          | STAD | -0.185503771 |
| UCKL1 | Phenylalanine, tyrosine and tryptophan metabolism | STAD | 0.205567981  |
| UCKL1 | Phosphonate and phosphite metabolism              | STAD | 0.070288171  |
| UCKL1 | Pi3k_akt_activation                               | STAD | -0.275707878 |
| UCKL1 | Pi3k_akt_mtor_signaling                           | STAD | -0.184163758 |
| UCKL1 | Porphyrim and chlorophyll biosynthesis            | STAD | -0.01706379  |
| UCKL1 | Primary bile acid biosynthesis                    | STAD | -0.100775688 |
| UCKL1 | Propanoate metabolism                             | STAD | -0.011623351 |
| UCKL1 | Purine metabolism                                 | STAD | 0.14290559   |
| UCKL1 | Pyrimidine metabolism                             | STAD | 0.278917773  |
| UCKL1 | Pyruvate metabolism                               | STAD | 0.132934608  |
| UCKL1 | Regulation_of_autophagy                           | STAD | -0.214723757 |
| UCKL1 | Retinol metabolism                                | STAD | -0.13097136  |
| UCKL1 | Riboflavin metabolism                             | STAD | 0.107151885  |
| UCKL1 | Schmahl_pdgf_signaling                            | STAD | -0.380543265 |
| UCKL1 | Selenocompound metabolism                         | STAD | 0.219047762  |



|       |                            |      |              |
|-------|----------------------------|------|--------------|
| UCKL1 | Signaling_by_hippo         | STAD | -0.040100963 |
| UCKL1 | Sphingolipid metabolism    | STAD | -0.051508694 |
| UCKL1 | Starch and sucrose metabo  | STAD | -0.269597557 |
| UCKL1 | Steroid biosynthesis       | STAD | 0.286086849  |
| UCKL1 | Steroid hormone biosynth   | STAD | -0.080546809 |
| UCKL1 | Sulfur metabolism          | STAD | -0.011214735 |
| UCKL1 | Synthesis and degradation  | STAD | 0.011210331  |
| UCKL1 | T helper cell              | STAD | -0.321941385 |
| UCKL1 | T helper1 (th1) cell       | STAD | -0.227461578 |
| UCKL1 | T helper17 (th17) cell     | STAD | -0.207780154 |
| UCKL1 | T helper2 (th2) cell       | STAD | -0.314591692 |
| UCKL1 | T helper9 (th9) cell       | STAD | -0.247547193 |
| UCKL1 | Taurine and hypotaurine r  | STAD | -0.040102425 |
| UCKL1 | Terpenoid backbone biosy   | STAD | 0.18678413   |
| UCKL1 | Tgf_beta_signaling_pathw   | STAD | -0.382909315 |
| UCKL1 | Thiamine metabolism        | STAD | 0.102533796  |
| UCKL1 | Tnfa_signaling_via_nfkb    | STAD | -0.311202405 |
| UCKL1 | Tryptophan metabolism      | STAD | -0.174348437 |
| UCKL1 | Tumor endothelial cell     | STAD | -0.012379954 |
| UCKL1 | Tyrosine metabolism        | STAD | -0.260189534 |
| UCKL1 | Ubiquinone and other terp  | STAD | 0.069625104  |
| UCKL1 | Valine, leucine and isoleu | STAD | -0.098954436 |
| UCKL1 | Valine, leucine and isoleu | STAD | -0.032172122 |
| UCKL1 | Vascular endothelial cell  | STAD | -0.299576049 |
| UCKL1 | Vascular smooth muscle c   | STAD | -0.312417982 |
| UCKL1 | Vegf_signaling_pathway     | STAD | -0.311291934 |
| UCKL1 | Vitamin b6 metabolism      | STAD | 0.140432621  |
| UCKL1 | Willert_wnt_signaling      | STAD | 0.106660549  |
| UCKL1 | Wnt_beta_catenin_signali   | STAD | 0.028481659  |
| UPP1  | Abnormal plasma cell       | STAD | -0.203833725 |
| UPP1  | Activated b cell           | STAD | -0.070110244 |
| UPP1  | Activated cd4+ t cell      | STAD | -0.026066633 |
| UPP1  | Activated t cell           | STAD | -0.045872896 |
| UPP1  | Alanine, aspartate and glu | STAD | 0.109837282  |
| UPP1  | Alcala_apoptosis           | STAD | 0.211008565  |
| UPP1  | Alpha-linolenic acid meta  | STAD | 0.191956087  |
| UPP1  | Amino sugar and nucleoti   | STAD | 0.330698077  |
| UPP1  | Ampk_pathway               | STAD | -0.082359839 |
| UPP1  | Angiogenesis               | STAD | 0.167239278  |
| UPP1  | Arachidonic acid metabol   | STAD | 0.275803727  |
| UPP1  | Arginine and proline metæ  | STAD | 0.214442585  |
| UPP1  | Arginine biosynthesis      | STAD | 0.253141021  |
| UPP1  | Ascorbate and aldarate mæ  | STAD | 0.130116095  |

|      |                             |      |              |
|------|-----------------------------|------|--------------|
| UPP1 | Atypical memory b cell      | STAD | -0.082634871 |
| UPP1 | Ax1+siglec6+ dendritic ce   | STAD | 0.032310127  |
| UPP1 | B cell                      | STAD | -0.067012508 |
| UPP1 | B1 cell                     | STAD | -0.197971956 |
| UPP1 | Basal cell                  | STAD | 0.378268684  |
| UPP1 | Beta-alanine metabolism     | STAD | 0.072304095  |
| UPP1 | Biosynthesis of unsaturate  | STAD | 0.224119891  |
| UPP1 | Biotin metabolism           | STAD | -0.081077649 |
| UPP1 | Butanoate metabolism        | STAD | 0.080018266  |
| UPP1 | Caffeine metabolism         | STAD | 0.148184864  |
| UPP1 | Cancer stem cell            | STAD | 0.059113915  |
| UPP1 | Cancer stem-like cell       | STAD | -0.051086932 |
| UPP1 | Cd4+ cytotoxic t cell       | STAD | -0.02484625  |
| UPP1 | Cd4+ memory t cell          | STAD | -0.079104264 |
| UPP1 | Cd4+ regulatory t cell      | STAD | 0.009235071  |
| UPP1 | Cd4+ t helper cell          | STAD | -0.080825826 |
| UPP1 | Cd4+cd25+ regulatory t c    | STAD | -0.063317775 |
| UPP1 | Cd8+ cytotoxic t cell       | STAD | -0.012468268 |
| UPP1 | Cd8+ regulatory t cell      | STAD | -0.12244225  |
| UPP1 | Cell_cycle                  | STAD | 0.053404156  |
| UPP1 | Chandran_metastasis_top5    | STAD | -0.047952909 |
| UPP1 | Citrate cycle (tca cycle)   | STAD | 0.174471833  |
| UPP1 | Cysteine and methionine r   | STAD | 0.201465775  |
| UPP1 | Cytokine induced killer cε  | STAD | -0.176783424 |
| UPP1 | D-arginine and d-ornithin   | STAD | 0.216034214  |
| UPP1 | D-glutamine and d-glutan    | STAD | -0.002808382 |
| UPP1 | Dendritic cell              | STAD | 0.012419797  |
| UPP1 | Dna_repair                  | STAD | 0.210127578  |
| UPP1 | Dna_replication             | STAD | 0.121067349  |
| UPP1 | Double-negative memory      | STAD | -0.045614549 |
| UPP1 | Drug metabolism - cytoch    | STAD | 0.119542259  |
| UPP1 | Drug metabolism - other c   | STAD | 0.350908984  |
| UPP1 | E2f_targets                 | STAD | 0.088682988  |
| UPP1 | Ecm_receptor_interaction    | STAD | -0.042490133 |
| UPP1 | Effector cd4+ memory t (    | STAD | -0.140073239 |
| UPP1 | Effector cd8+ memory t (    | STAD | -0.011152459 |
| UPP1 | Effector memory t cell      | STAD | -0.0882846   |
| UPP1 | Effector regulatory t (treg | STAD | -0.062757021 |
| UPP1 | Elvidge_hif1a_targets_up    | STAD | 0.13492013   |
| UPP1 | Endothelial cell            | STAD | -0.099636872 |
| UPP1 | Eosinophil                  | STAD | 0.039353339  |
| UPP1 | Ether lipid metabolism      | STAD | 0.156225518  |
| UPP1 | Exhausted cd4+ t cell       | STAD | -0.029970873 |

|      |                              |      |              |
|------|------------------------------|------|--------------|
| UPP1 | Exhausted cd8+ t cell        | STAD | 0.009621742  |
| UPP1 | Exhausted t cell             | STAD | -0.0670456   |
| UPP1 | Fat cell (adipocyte)         | STAD | 0.036855559  |
| UPP1 | Fatty acid biosynthesis      | STAD | -0.041199137 |
| UPP1 | Fatty acid degradation       | STAD | 0.021263654  |
| UPP1 | Fatty acid elongation        | STAD | 0.289894964  |
| UPP1 | Fibroblast                   | STAD | 0.007887539  |
| UPP1 | Folate biosynthesis          | STAD | 0.229209196  |
| UPP1 | Follicular b cell            | STAD | -0.112808639 |
| UPP1 | Follicular dendritic cell    | STAD | -0.144671878 |
| UPP1 | Follicular helper (tfh) t ce | STAD | -0.019864006 |
| UPP1 | Follicular t cell            | STAD | -0.005641767 |
| UPP1 | Foxp3+il-17+ t cell          | STAD | 0.083025137  |
| UPP1 | Fructose and mannose me      | STAD | 0.342262455  |
| UPP1 | G2m_checkpoint               | STAD | 0.059815179  |
| UPP1 | Galactose metabolism         | STAD | 0.388770353  |
| UPP1 | Galie_tumor_stemness_ge      | STAD | -0.147077733 |
| UPP1 | Glutathione metabolism       | STAD | 0.379732307  |
| UPP1 | Glycerolipid metabolism      | STAD | 0.178865426  |
| UPP1 | Glycerophospholipid metæ     | STAD | 0.209971118  |
| UPP1 | Glycine, serine and threor   | STAD | 0.201450325  |
| UPP1 | Glycolysis / gluconeogene    | STAD | 0.268349357  |
| UPP1 | Glycosaminoglycan biosy1     | STAD | 0.108918639  |
| UPP1 | Glycosaminoglycan biosy1     | STAD | -0.021311272 |
| UPP1 | Glycosaminoglycan biosy1     | STAD | 0.264193294  |
| UPP1 | Glycosaminoglycan degra      | STAD | 0.217659137  |
| UPP1 | Glycosphingolipid biosyn1    | STAD | 0.133488028  |
| UPP1 | Glycosphingolipid biosyn1    | STAD | 0.115506386  |
| UPP1 | Glycosphingolipid biosyn1    | STAD | 0.210385951  |
| UPP1 | Glycosylphosphatidylinos:    | STAD | 0.053144075  |
| UPP1 | Glyoxylate and dicarboxy     | STAD | 0.087272198  |
| UPP1 | Granulocyte                  | STAD | 0.030921647  |
| UPP1 | Hedgehog_signaling           | STAD | -0.162368713 |
| UPP1 | Histidine metabolism         | STAD | -0.02844354  |
| UPP1 | Hypoxia                      | STAD | 0.334185798  |
| UPP1 | Il-17ralpha t cell           | STAD | -0.061320565 |
| UPP1 | Il2_stat5_signaling          | STAD | 0.139817377  |
| UPP1 | Il6_jak_stat3_signaling      | STAD | 0.179136212  |
| UPP1 | Immune_checkpoints_tunr      | STAD | 0.067686914  |
| UPP1 | Immune_inhibition_cytok      | STAD | 0.166631559  |
| UPP1 | Inositol phosphate metabo    | STAD | -0.224011998 |
| UPP1 | Interleukin_6_signaling      | STAD | -0.108123288 |
| UPP1 | Jaeger_metastasis_up         | STAD | 0.170349641  |

|      |                             |      |              |
|------|-----------------------------|------|--------------|
| UPP1 | Jain_nfkb_signaling         | STAD | 0.104796603  |
| UPP1 | Kras_signaling_up           | STAD | 0.069781455  |
| UPP1 | Linoleic acid metabolism    | STAD | 0.151028711  |
| UPP1 | Lipoic acid metabolism      | STAD | -0.096133261 |
| UPP1 | Lysine degradation          | STAD | -0.173502836 |
| UPP1 | Lysosome                    | STAD | 0.237725751  |
| UPP1 | M1 macrophage               | STAD | 0.072838158  |
| UPP1 | M2 macrophage               | STAD | 0.046573443  |
| UPP1 | Mannose type o-glycan bi    | STAD | -0.185183957 |
| UPP1 | Mapk_signaling_pathway      | STAD | 0.022550167  |
| UPP1 | Mapk3_erk1_activation       | STAD | 0.079993211  |
| UPP1 | Marginal zone b cell        | STAD | -0.145600876 |
| UPP1 | Memory b cell               | STAD | -0.109025202 |
| UPP1 | Mesenchymal cell            | STAD | 0.049314216  |
| UPP1 | Mesenchymal stem cell       | STAD | -0.062762297 |
| UPP1 | Metabolism of xenobiotic    | STAD | 0.201645084  |
| UPP1 | Migrating cancer stem cel   | STAD | 0.175715294  |
| UPP1 | Mitotic_spindle             | STAD | -0.130276306 |
| UPP1 | Monocyte                    | STAD | 0.208614954  |
| UPP1 | Mtor_signaling_pathway      | STAD | -0.105135817 |
| UPP1 | Mtorc1_signaling            | STAD | 0.329636274  |
| UPP1 | Mucin type o-glycan biosy   | STAD | 0.016377928  |
| UPP1 | Myc_targets_v1              | STAD | 0.186491055  |
| UPP1 | Myeloid cell                | STAD | -0.032411975 |
| UPP1 | N-glycan biosynthesis       | STAD | 0.165263763  |
| UPP1 | Naive b cell                | STAD | -0.041664679 |
| UPP1 | Naive cd4+ t cell           | STAD | -0.179641704 |
| UPP1 | Naive cd8+ t cell           | STAD | -0.225894429 |
| UPP1 | Natural killer cell         | STAD | -0.039342169 |
| UPP1 | Natural killer t (nkt) cell | STAD | 0.065422838  |
| UPP1 | Natural regulatory t (treg) | STAD | -0.044186353 |
| UPP1 | Neomycin, kanamycin and     | STAD | 0.323545079  |
| UPP1 | Neutrophil                  | STAD | 0.279275469  |
| UPP1 | Nicotinate and nicotinami   | STAD | 0.133079309  |
| UPP1 | Nitrogen metabolism         | STAD | -0.044457041 |
| UPP1 | Nod_like_receptor_signal    | STAD | 0.187256057  |
| UPP1 | Notch_signaling             | STAD | 0.078466508  |
| UPP1 | One carbon pool by folate   | STAD | 0.032982283  |
| UPP1 | Other glycan degradation    | STAD | 0.091837735  |
| UPP1 | Other types of o-glycan b   | STAD | 0.021929036  |
| UPP1 | Oxidative phosphorylatio    | STAD | 0.343840965  |
| UPP1 | P53_pathway                 | STAD | 0.314891885  |
| UPP1 | P53_signaling_pathway       | STAD | 0.051577923  |

|      |                            |      |              |
|------|----------------------------|------|--------------|
| UPP1 | Pantothenate and coa bios  | STAD | 0.207030681  |
| UPP1 | Pentose and glucuronate i  | STAD | 0.236850822  |
| UPP1 | Pentose phosphate pathwa   | STAD | 0.363006403  |
| UPP1 | Pericyte                   | STAD | -0.038829496 |
| UPP1 | Phenylalanine metabolism   | STAD | 0.255337332  |
| UPP1 | Phenylalanine, tyrosine ar | STAD | 0.230405528  |
| UPP1 | Phosphonate and phosphir   | STAD | 0.100141136  |
| UPP1 | Pi3k_akt_activation        | STAD | -0.178464713 |
| UPP1 | Pi3k_akt_mtor_signaling    | STAD | 0.258074195  |
| UPP1 | Porphyrin and chlorophyl   | STAD | 0.305282149  |
| UPP1 | Primary bile acid biosynt  | STAD | 0.077546774  |
| UPP1 | Propanoate metabolism      | STAD | -0.03824177  |
| UPP1 | Purine metabolism          | STAD | 0.17736709   |
| UPP1 | Pyrimidine metabolism      | STAD | 0.210754169  |
| UPP1 | Pyruvate metabolism        | STAD | 0.089889358  |
| UPP1 | Regulation_of_autophagy    | STAD | 0.064202535  |
| UPP1 | Retinol metabolism         | STAD | 0.209035558  |
| UPP1 | Riboflavin metabolism      | STAD | 0.236411072  |
| UPP1 | Schmahl_pdgf_signaling     | STAD | -0.126912567 |
| UPP1 | Selenocompound metabol     | STAD | -0.022027422 |
| UPP1 | Signaling_by_hippo         | STAD | -0.219829101 |
| UPP1 | Sphingolipid metabolism    | STAD | 0.177990359  |
| UPP1 | Starch and sucrose metabo  | STAD | 0.098048723  |
| UPP1 | Steroid biosynthesis       | STAD | 0.218363838  |
| UPP1 | Steroid hormone biosynth   | STAD | 0.309610254  |
| UPP1 | Sulfur metabolism          | STAD | 0.1514293    |
| UPP1 | Synthesis and degradation  | STAD | 0.081069677  |
| UPP1 | T helper cell              | STAD | -0.023879864 |
| UPP1 | T helper1 (th1) cell       | STAD | 0.077545686  |
| UPP1 | T helper17 (th17) cell     | STAD | 0.082819686  |
| UPP1 | T helper2 (th2) cell       | STAD | -0.015121253 |
| UPP1 | T helper9 (th9) cell       | STAD | -0.060669809 |
| UPP1 | Taurine and hypotaurine r  | STAD | 0.01505205   |
| UPP1 | Terpenoid backbone biosy   | STAD | 0.184961659  |
| UPP1 | Tgf_beta_signaling_pathw   | STAD | -0.166732311 |
| UPP1 | Thiamine metabolism        | STAD | 0.235712246  |
| UPP1 | Tnfa_signaling_via_nfk     | STAD | 0.271242181  |
| UPP1 | Tryptophan metabolism      | STAD | 0.016453618  |
| UPP1 | Tumor endothelial cell     | STAD | 0.295362178  |
| UPP1 | Tyrosine metabolism        | STAD | 0.095931459  |
| UPP1 | Ubiquinone and other ter   | STAD | 0.245195031  |
| UPP1 | Valine, leucine and isoleu | STAD | 0.227470873  |
| UPP1 | Valine, leucine and isoleu | STAD | 0.040414507  |

|      |                            |      |              |
|------|----------------------------|------|--------------|
| UPP1 | Vascular endothelial cell  | STAD | 0.095946245  |
| UPP1 | Vascular smooth muscle c   | STAD | -0.067446268 |
| UPP1 | Vegf_signaling_pathway     | STAD | 0.200096112  |
| UPP1 | Vitamin b6 metabolism      | STAD | 0.080287148  |
| UPP1 | Willert_wnt_signaling      | STAD | 0.121964681  |
| UPP1 | Wnt_beta_catenin_signali   | STAD | -0.177338634 |
| UPP2 | Abnormal plasma cell       | STAD | 0.031510596  |
| UPP2 | Activated b cell           | STAD | 0.014354741  |
| UPP2 | Activated cd4+ t cell      | STAD | 0.038202819  |
| UPP2 | Activated t cell           | STAD | 0.026761538  |
| UPP2 | Alanine, aspartate and glu | STAD | -0.185789166 |
| UPP2 | Alcala_apoptosis           | STAD | -0.139315139 |
| UPP2 | Alpha-linolenic acid meta  | STAD | -0.084485157 |
| UPP2 | Amino sugar and nucleoti   | STAD | -0.173414463 |
| UPP2 | Ampk_pathway               | STAD | -0.184234093 |
| UPP2 | Angiogenesis               | STAD | -0.125231951 |
| UPP2 | Arachidonic acid metabol   | STAD | -0.008596938 |
| UPP2 | Arginine and proline meta  | STAD | -0.229589498 |
| UPP2 | Arginine biosynthesis      | STAD | -0.20193787  |
| UPP2 | Ascorbate and aldarate me  | STAD | -0.046129068 |
| UPP2 | Atypical memory b cell     | STAD | 0.024464263  |
| UPP2 | Axl+siglec6+ dendritic ce  | STAD | 0.017475049  |
| UPP2 | B cell                     | STAD | 0.033566183  |
| UPP2 | B1 cell                    | STAD | 0.00251939   |
| UPP2 | Basal cell                 | STAD | -0.022100698 |
| UPP2 | Beta-alanine metabolism    | STAD | -0.201219144 |
| UPP2 | Biosynthesis of unsaturate | STAD | -0.183643642 |
| UPP2 | Biotin metabolism          | STAD | -0.170223669 |
| UPP2 | Butanoate metabolism       | STAD | -0.19193711  |
| UPP2 | Caffeine metabolism        | STAD | -0.074139596 |
| UPP2 | Cancer stem cell           | STAD | 0.017759132  |
| UPP2 | Cancer stem-like cell      | STAD | -0.041307734 |
| UPP2 | Cd4+ cytotoxic t cell      | STAD | 0.040375759  |
| UPP2 | Cd4+ memory t cell         | STAD | 0.030008117  |
| UPP2 | Cd4+ regulatory t cell     | STAD | -0.004881902 |
| UPP2 | Cd4+ t helper cell         | STAD | 0.036998005  |
| UPP2 | Cd4+cd25+ regulatory t c   | STAD | 0.029506585  |
| UPP2 | Cd8+ cytotoxic t cell      | STAD | 0.045950658  |
| UPP2 | Cd8+ regulatory t cell     | STAD | 0.018675387  |
| UPP2 | Cell_cycle                 | STAD | -0.114569818 |
| UPP2 | Chandran_metastasis_top5   | STAD | -0.122023577 |
| UPP2 | Citrate cycle (tca cycle)  | STAD | -0.165105031 |
| UPP2 | Cysteine and methionine r  | STAD | -0.117642085 |

|      |                              |      |              |
|------|------------------------------|------|--------------|
| UPP2 | Cytokine induced killer cell | STAD | 0.057669077  |
| UPP2 | D-arginine and d-ornithin    | STAD | 0.19392507   |
| UPP2 | D-glutamine and d-glutan     | STAD | -0.071895683 |
| UPP2 | Dendritic cell               | STAD | 0.03322495   |
| UPP2 | Dna_repair                   | STAD | -0.099474995 |
| UPP2 | Dna_replication              | STAD | -0.078568971 |
| UPP2 | Double-negative memory       | STAD | 0.018412548  |
| UPP2 | Drug metabolism - cytoch     | STAD | -0.05210196  |
| UPP2 | Drug metabolism - other      | STAD | -0.100131125 |
| UPP2 | E2f_targets                  | STAD | -0.103078898 |
| UPP2 | Ecm_receptor_interaction     | STAD | -0.062914608 |
| UPP2 | Effector cd4+ memory t       | STAD | 0.030079234  |
| UPP2 | Effector cd8+ memory t       | STAD | 0.018878896  |
| UPP2 | Effector memory t cell       | STAD | 0.037498015  |
| UPP2 | Effector regulatory t (treg) | STAD | 0.008167325  |
| UPP2 | Elvidge_hif1a_targets_up     | STAD | -0.170483114 |
| UPP2 | Endothelial cell             | STAD | 0.047148845  |
| UPP2 | Eosinophil                   | STAD | 0.02470365   |
| UPP2 | Ether lipid metabolism       | STAD | -0.132489648 |
| UPP2 | Exhausted cd4+ t cell        | STAD | 0.069893345  |
| UPP2 | Exhausted cd8+ t cell        | STAD | 0.073826522  |
| UPP2 | Exhausted t cell             | STAD | 0.035449715  |
| UPP2 | Fat cell (adipocyte)         | STAD | -0.163407759 |
| UPP2 | Fatty acid biosynthesis      | STAD | -0.12277445  |
| UPP2 | Fatty acid degradation       | STAD | -0.226348129 |
| UPP2 | Fatty acid elongation        | STAD | -0.171366776 |
| UPP2 | Fibroblast                   | STAD | 0.036786031  |
| UPP2 | Folate biosynthesis          | STAD | -0.185252142 |
| UPP2 | Follicular b cell            | STAD | 0.04363613   |
| UPP2 | Follicular dendritic cell    | STAD | 0.04031729   |
| UPP2 | Follicular helper (tfh) t    | STAD | 0.048608587  |
| UPP2 | Follicular t cell            | STAD | -0.052747101 |
| UPP2 | Foxp3+il-17+ t cell          | STAD | -0.024168268 |
| UPP2 | Fructose and mannose me      | STAD | -0.203357196 |
| UPP2 | G2m_checkpoint               | STAD | -0.135633876 |
| UPP2 | Galactose metabolism         | STAD | -0.16540805  |
| UPP2 | Galie_tumor_stemness_ge      | STAD | -0.03251854  |
| UPP2 | Glutathione metabolism       | STAD | -0.112480789 |
| UPP2 | Glycerolipid metabolism      | STAD | -0.223873801 |
| UPP2 | Glycerophospholipid met      | STAD | -0.165966707 |
| UPP2 | Glycine, serine and threor   | STAD | -0.123145541 |
| UPP2 | Glycolysis / gluconeogene    | STAD | -0.188719322 |
| UPP2 | Glycosaminoglycan biosy      | STAD | -0.091182668 |

|      |                           |      |              |
|------|---------------------------|------|--------------|
| UPP2 | Glycosaminoglycan biosyn  | STAD | -0.0990815   |
| UPP2 | Glycosaminoglycan biosyn  | STAD | -0.132961397 |
| UPP2 | Glycosaminoglycan degra   | STAD | -0.101424492 |
| UPP2 | Glycosphingolipid biosyn  | STAD | -0.027522383 |
| UPP2 | Glycosphingolipid biosyn  | STAD | -0.094831345 |
| UPP2 | Glycosphingolipid biosyn  | STAD | -0.085329694 |
| UPP2 | Glycosylphosphatidylinos  | STAD | -0.043940598 |
| UPP2 | Glyoxylate and dicarboxy  | STAD | -0.188230055 |
| UPP2 | Granulocyte               | STAD | -0.013572683 |
| UPP2 | Hedgehog_signaling        | STAD | -0.031076968 |
| UPP2 | Histidine metabolism      | STAD | -0.125772439 |
| UPP2 | Hypoxia                   | STAD | -0.107379345 |
| UPP2 | Il-17ralpha t cell        | STAD | 0.048349166  |
| UPP2 | Il2_stat5_signaling       | STAD | -0.130617782 |
| UPP2 | Il6_jak_stat3_signaling   | STAD | -0.079413632 |
| UPP2 | Immune_checkpoints_tunr   | STAD | -0.090986842 |
| UPP2 | Immune_inhibition_cytok   | STAD | -0.03800614  |
| UPP2 | Inositol phosphate metabo | STAD | -0.163005308 |
| UPP2 | Interleukin_6_signaling   | STAD | -0.068201586 |
| UPP2 | Jaeger_metastasis_up      | STAD | -0.159805393 |
| UPP2 | Jain_nfkb_signaling       | STAD | -0.12963148  |
| UPP2 | Kras_signaling_up         | STAD | -0.095423714 |
| UPP2 | Linoleic acid metabolism  | STAD | -0.020749915 |
| UPP2 | Lipoic acid metabolism    | STAD | 0.027544744  |
| UPP2 | Lysine degradation        | STAD | -0.238423856 |
| UPP2 | Lysosome                  | STAD | -0.096874204 |
| UPP2 | M1 macrophage             | STAD | 0.040754145  |
| UPP2 | M2 macrophage             | STAD | -0.026091068 |
| UPP2 | Mannose type o-glycan bi  | STAD | -0.113141237 |
| UPP2 | Mapk_signaling_pathway    | STAD | -0.061521613 |
| UPP2 | Mapk3_erk1_activation     | STAD | -0.127619102 |
| UPP2 | Marginal zone b cell      | STAD | 0.038754682  |
| UPP2 | Memory b cell             | STAD | 0.031905811  |
| UPP2 | Mesenchymal cell          | STAD | 0.049700432  |
| UPP2 | Mesenchymal stem cell     | STAD | 0.023036134  |
| UPP2 | Metabolism of xenobiotic  | STAD | -0.047990511 |
| UPP2 | Migrating cancer stem cel | STAD | -0.084078269 |
| UPP2 | Mitotic_spindle           | STAD | -0.21416104  |
| UPP2 | Monocyte                  | STAD | 0.046422844  |
| UPP2 | Mtor_signaling_pathway    | STAD | -0.12599294  |
| UPP2 | Mtorc1_signaling          | STAD | -0.131165399 |
| UPP2 | Mucin type o-glycan bios  | STAD | -0.163202976 |
| UPP2 | Myc_targets_v1            | STAD | -0.072650126 |



|      |                             |      |              |
|------|-----------------------------|------|--------------|
| UPP2 | Myeloid cell                | STAD | 0.016305667  |
| UPP2 | N-glycan biosynthesis       | STAD | -0.158368533 |
| UPP2 | Naive b cell                | STAD | 0.045862958  |
| UPP2 | Naive cd4+ t cell           | STAD | 0.075458083  |
| UPP2 | Naive cd8+ t cell           | STAD | 0.075976315  |
| UPP2 | Natural killer cell         | STAD | 0.046253399  |
| UPP2 | Natural killer t (nkt) cell | STAD | 0.060574951  |
| UPP2 | Natural regulatory t (treg) | STAD | 0.033161238  |
| UPP2 | Neomycin, kanamycin and     | STAD | -0.142906349 |
| UPP2 | Neutrophil                  | STAD | -0.001956834 |
| UPP2 | Nicotinate and nicotinami   | STAD | -0.170344074 |
| UPP2 | Nitrogen metabolism         | STAD | -0.076892083 |
| UPP2 | Nod_like_receptor_signal    | STAD | -0.138681143 |
| UPP2 | Notch_signaling             | STAD | -0.102910392 |
| UPP2 | One carbon pool by folate   | STAD | -0.186197189 |
| UPP2 | Other glycan degradation    | STAD | -0.104243858 |
| UPP2 | Other types of o-glycan b   | STAD | -0.071123826 |
| UPP2 | Oxidative phosphorylatio    | STAD | -0.034018771 |
| UPP2 | P53_pathway                 | STAD | -0.127426003 |
| UPP2 | P53_signaling_pathway       | STAD | -0.185425381 |
| UPP2 | Pantothenate and coa bios   | STAD | -0.131086823 |
| UPP2 | Pentose and glucuronate i   | STAD | -0.065949972 |
| UPP2 | Pentose phosphate pathwa    | STAD | -0.108222373 |
| UPP2 | Pericyte                    | STAD | 0.024752552  |
| UPP2 | Phenylalanine metabolism    | STAD | -0.01532855  |
| UPP2 | Phenylalanine, tyrosine ar  | STAD | 0.019428897  |
| UPP2 | Phosphonate and phosphir    | STAD | -0.03991006  |
| UPP2 | Pi3k_akt_activation         | STAD | -0.106284522 |
| UPP2 | Pi3k_akt_mtor_signaling     | STAD | -0.094926901 |
| UPP2 | Porphyrin and chlorophyl    | STAD | -0.074646237 |
| UPP2 | Primary bile acid biosynt   | STAD | 0.070680935  |
| UPP2 | Propanoate metabolism       | STAD | -0.199051104 |
| UPP2 | Purine metabolism           | STAD | -0.228468838 |
| UPP2 | Pyrimidine metabolism       | STAD | -0.158321614 |
| UPP2 | Pyruvate metabolism         | STAD | -0.200220238 |
| UPP2 | Regulation_of_autophagy     | STAD | 0.099640434  |
| UPP2 | Retinol metabolism          | STAD | -0.036182169 |
| UPP2 | Riboflavin metabolism       | STAD | -0.10019657  |
| UPP2 | Schmahl_pdgf_signaling      | STAD | -0.030844846 |
| UPP2 | Selenocompound metabol      | STAD | -0.109589997 |
| UPP2 | Signaling_by_hippo          | STAD | -0.080800179 |
| UPP2 | Sphingolipid metabolism     | STAD | -0.21993817  |
| UPP2 | Starch and sucrose metabo   | STAD | -0.145199177 |

|      |                            |      |              |
|------|----------------------------|------|--------------|
| UPP2 | Steroid biosynthesis       | STAD | -0.088956135 |
| UPP2 | Steroid hormone biosynth   | STAD | 0.024941648  |
| UPP2 | Sulfur metabolism          | STAD | -0.17780551  |
| UPP2 | Synthesis and degradation  | STAD | -0.239340148 |
| UPP2 | T helper cell              | STAD | 0.051541841  |
| UPP2 | T helper1 (th1) cell       | STAD | 0.024541571  |
| UPP2 | T helper17 (th17) cell     | STAD | 0.043696728  |
| UPP2 | T helper2 (th2) cell       | STAD | 0.067678857  |
| UPP2 | T helper9 (th9) cell       | STAD | 0.066759014  |
| UPP2 | Taurine and hypotaurine r  | STAD | 0.054117198  |
| UPP2 | Terpenoid backbone biosy   | STAD | -0.17754582  |
| UPP2 | Tgf_beta_signaling_pathw   | STAD | -0.037400207 |
| UPP2 | Thiamine metabolism        | STAD | -0.129375895 |
| UPP2 | Tnfa_signaling_via_nfb     | STAD | -0.05604209  |
| UPP2 | Tryptophan metabolism      | STAD | -0.146833932 |
| UPP2 | Tumor endothelial cell     | STAD | 0.006406365  |
| UPP2 | Tyrosine metabolism        | STAD | -0.045986226 |
| UPP2 | Ubiquinone and other terf  | STAD | -0.091565561 |
| UPP2 | Valine, leucine and isoleu | STAD | -0.102301213 |
| UPP2 | Valine, leucine and isoleu | STAD | -0.219379083 |
| UPP2 | Vascular endothelial cell  | STAD | 0.026530466  |
| UPP2 | Vascular smooth muscle c   | STAD | 0.062935074  |
| UPP2 | Vegf_signaling_pathway     | STAD | -0.192518116 |
| UPP2 | Vitamin b6 metabolism      | STAD | -0.102708472 |
| UPP2 | Willert_wnt_signaling      | STAD | 0.073513942  |
| UPP2 | Wnt_beta_catenin_signali   | STAD | -0.120407248 |
| CDA  | Abnormal plasma cell       | TGCT | -0.264003465 |
| CDA  | Activated b cell           | TGCT | 0.204074907  |
| CDA  | Activated cd4+ t cell      | TGCT | 0.068516045  |
| CDA  | Activated t cell           | TGCT | 0.096811184  |
| CDA  | Alanine, aspartate and glu | TGCT | 0.392659916  |
| CDA  | Alcala_apoptosis           | TGCT | 0.408829218  |
| CDA  | Alpha-linolenic acid meta  | TGCT | 0.220375222  |
| CDA  | Amino sugar and nucleoti   | TGCT | 0.639189737  |
| CDA  | Ampk_pathway               | TGCT | -0.28413855  |
| CDA  | Angiogenesis               | TGCT | 0.048513563  |
| CDA  | Arachidonic acid metabol   | TGCT | 0.342533348  |
| CDA  | Arginine and proline metæ  | TGCT | 0.464563269  |
| CDA  | Arginine biosynthesis      | TGCT | 0.261885079  |
| CDA  | Ascorbate and aldarate mε  | TGCT | 0.030794452  |
| CDA  | Atypical memory b cell     | TGCT | -0.109855988 |
| CDA  | Axl+siglec6+ dendritic ce  | TGCT | 0.270663029  |
| CDA  | B cell                     | TGCT | 0.130061641  |

|     |                             |      |              |
|-----|-----------------------------|------|--------------|
| CDA | B1 cell                     | TGCT | 0.027612089  |
| CDA | Basal cell                  | TGCT | 0.197065632  |
| CDA | Beta-alanine metabolism     | TGCT | 0.11400047   |
| CDA | Biosynthesis of unsaturate  | TGCT | 0.210176855  |
| CDA | Biotin metabolism           | TGCT | -0.315247305 |
| CDA | Butanoate metabolism        | TGCT | 0.104967913  |
| CDA | Caffeine metabolism         | TGCT | 0.056978072  |
| CDA | Cancer stem cell            | TGCT | 0.115099961  |
| CDA | Cancer stem-like cell       | TGCT | -0.130816561 |
| CDA | Cd4+ cytotoxic t cell       | TGCT | 0.191260819  |
| CDA | Cd4+ memory t cell          | TGCT | 0.034490552  |
| CDA | Cd4+ regulatory t cell      | TGCT | 0.154884505  |
| CDA | Cd4+ t helper cell          | TGCT | 0.065813093  |
| CDA | Cd4+cd25+ regulatory t c    | TGCT | 0.076973015  |
| CDA | Cd8+ cytotoxic t cell       | TGCT | 0.158087801  |
| CDA | Cd8+ regulatory t cell      | TGCT | 0.051397263  |
| CDA | Cell_cycle                  | TGCT | 0.067751889  |
| CDA | Chandran_metastasis_top5    | TGCT | -0.048794645 |
| CDA | Citrate cycle (tca cycle)   | TGCT | 0.48683386   |
| CDA | Cysteine and methionine r   | TGCT | 0.473829041  |
| CDA | Cytokine induced killer c   | TGCT | -0.025438494 |
| CDA | D-arginine and d-ornithin   | TGCT | 0.002959003  |
| CDA | D-glutamine and d-glutan    | TGCT | 0.245094243  |
| CDA | Dendritic cell              | TGCT | 0.172901654  |
| CDA | Dna_repair                  | TGCT | 0.36582829   |
| CDA | Dna_replication             | TGCT | 0.182618602  |
| CDA | Double-negative memory      | TGCT | 0.084539667  |
| CDA | Drug metabolism - cytoch    | TGCT | 0.053162818  |
| CDA | Drug metabolism - other     | TGCT | 0.449499754  |
| CDA | E2f_targets                 | TGCT | 0.066481367  |
| CDA | Ecm_receptor_interaction    | TGCT | -0.118420624 |
| CDA | Effector cd4+ memory t (    | TGCT | 0.034329502  |
| CDA | Effector cd8+ memory t (    | TGCT | 0.279757876  |
| CDA | Effector memory t cell      | TGCT | 0.019671735  |
| CDA | Effector regulatory t (treg | TGCT | -0.008571952 |
| CDA | Elvidge_hif1a_targets_up    | TGCT | 0.121818635  |
| CDA | Endothelial cell            | TGCT | -0.006831554 |
| CDA | Eosinophil                  | TGCT | 0.273914359  |
| CDA | Ether lipid metabolism      | TGCT | 0.079845447  |
| CDA | Exhausted cd4+ t cell       | TGCT | 0.048688915  |
| CDA | Exhausted cd8+ t cell       | TGCT | 0.198078678  |
| CDA | Exhausted t cell            | TGCT | 0.137088647  |
| CDA | Fat cell (adipocyte)        | TGCT | 0.143572663  |

|     |                              |      |              |
|-----|------------------------------|------|--------------|
| CDA | Fatty acid biosynthesis      | TGCT | 0.258129696  |
| CDA | Fatty acid degradation       | TGCT | 0.00988695   |
| CDA | Fatty acid elongation        | TGCT | 0.282843146  |
| CDA | Fibroblast                   | TGCT | -0.001537557 |
| CDA | Folate biosynthesis          | TGCT | 0.328500892  |
| CDA | Follicular b cell            | TGCT | 0.121882992  |
| CDA | Follicular dendritic cell    | TGCT | 0.102975049  |
| CDA | Follicular helper (tfh) t ce | TGCT | 0.068337187  |
| CDA | Follicular t cell            | TGCT | 0.162804647  |
| CDA | Foxp3+il-17+ t cell          | TGCT | 0.21654559   |
| CDA | Fructose and mannose me      | TGCT | 0.485062551  |
| CDA | G2m_checkpoint               | TGCT | -0.05630144  |
| CDA | Galactose metabolism         | TGCT | 0.573568951  |
| CDA | Galie_tumor_stemness_ge      | TGCT | -0.125156051 |
| CDA | Glutathione metabolism       | TGCT | 0.586191559  |
| CDA | Glycerolipid metabolism      | TGCT | 0.038884038  |
| CDA | Glycerophospholipid metæ     | TGCT | 0.328785945  |
| CDA | Glycine, serine and threor   | TGCT | 0.372085366  |
| CDA | Glycolysis / gluconeogene    | TGCT | 0.553090812  |
| CDA | Glycosaminoglycan biosy      | TGCT | 0.204277639  |
| CDA | Glycosaminoglycan biosy      | TGCT | -0.078574507 |
| CDA | Glycosaminoglycan biosy      | TGCT | -0.106826808 |
| CDA | Glycosaminoglycan degra      | TGCT | 0.079897787  |
| CDA | Glycosphingolipid biosyn     | TGCT | -0.082931939 |
| CDA | Glycosphingolipid biosyn     | TGCT | 0.425729251  |
| CDA | Glycosphingolipid biosyn     | TGCT | 0.117851451  |
| CDA | Glycosylphosphatidylinos     | TGCT | -0.048342159 |
| CDA | Glyoxylate and dicarboxy     | TGCT | 0.395469041  |
| CDA | Granulocyte                  | TGCT | 0.218774188  |
| CDA | Hedgehog_signaling           | TGCT | -0.245887861 |
| CDA | Histidine metabolism         | TGCT | 0.029061908  |
| CDA | Hypoxia                      | TGCT | 0.43125184   |
| CDA | Il-17ralpha t cell           | TGCT | 0.055858879  |
| CDA | Il2_stat5_signaling          | TGCT | 0.411908572  |
| CDA | Il6_jak_stat3_signaling      | TGCT | 0.207807253  |
| CDA | Immune_checkpoints_tun       | TGCT | 0.239791262  |
| CDA | Immune_inhibition_cytok      | TGCT | 0.389063101  |
| CDA | Inositol phosphate metabo    | TGCT | -0.522031492 |
| CDA | Interleukin_6_signaling      | TGCT | -0.25821495  |
| CDA | Jaeger_metastasis_up         | TGCT | 0.308939868  |
| CDA | Jain_nfkb_signaling          | TGCT | 0.320557176  |
| CDA | Kras_signaling_up            | TGCT | 0.154997918  |
| CDA | Linoleic acid metabolism     | TGCT | 0.048968206  |

|     |                             |      |              |
|-----|-----------------------------|------|--------------|
| CDA | Lipoic acid metabolism      | TGCT | 0.126599021  |
| CDA | Lysine degradation          | TGCT | -0.203421838 |
| CDA | Lysosome                    | TGCT | 0.264940324  |
| CDA | M1 macrophage               | TGCT | 0.290687743  |
| CDA | M2 macrophage               | TGCT | 0.277681941  |
| CDA | Mannose type o-glycan bi    | TGCT | -0.553170136 |
| CDA | Mapk_signaling_pathway      | TGCT | 0.214640764  |
| CDA | Mapk3_erk1_activation       | TGCT | -0.274271503 |
| CDA | Marginal zone b cell        | TGCT | -0.023181704 |
| CDA | Memory b cell               | TGCT | 0.157136417  |
| CDA | Mesenchymal cell            | TGCT | 0.050188938  |
| CDA | Mesenchymal stem cell       | TGCT | 0.092277731  |
| CDA | Metabolism of xenobiotic    | TGCT | 0.162478547  |
| CDA | Migrating cancer stem cel   | TGCT | 0.320053659  |
| CDA | Mitotic_spindle             | TGCT | -0.499970996 |
| CDA | Monocyte                    | TGCT | 0.397777164  |
| CDA | Mtor_signaling_pathway      | TGCT | -0.268857995 |
| CDA | Mtorc1_signaling            | TGCT | 0.512710494  |
| CDA | Mucin type o-glycan biosy   | TGCT | -0.3039287   |
| CDA | Myc_targets_v1              | TGCT | 0.254781233  |
| CDA | Myeloid cell                | TGCT | 0.120576992  |
| CDA | N-glycan biosynthesis       | TGCT | -0.045676245 |
| CDA | Naive b cell                | TGCT | 0.254442305  |
| CDA | Naive cd4+ t cell           | TGCT | -0.061422995 |
| CDA | Naive cd8+ t cell           | TGCT | -0.089620948 |
| CDA | Natural killer cell         | TGCT | 0.098511262  |
| CDA | Natural killer t (nkt) cell | TGCT | 0.284166336  |
| CDA | Natural regulatory t (treg) | TGCT | -0.0279971   |
| CDA | Neomycin, kanamycin and     | TGCT | 0.436831189  |
| CDA | Neutrophil                  | TGCT | 0.452757103  |
| CDA | Nicotinate and nicotinami   | TGCT | 0.311664926  |
| CDA | Nitrogen metabolism         | TGCT | 0.050144538  |
| CDA | Nod_like_receptor_signal    | TGCT | 0.254521409  |
| CDA | Notch_signaling             | TGCT | 0.014913215  |
| CDA | One carbon pool by folate   | TGCT | 0.206207026  |
| CDA | Other glycan degradation    | TGCT | 0.288243978  |
| CDA | Other types of o-glycan b   | TGCT | -0.309437776 |
| CDA | Oxidative phosphorylatior   | TGCT | 0.631326016  |
| CDA | P53_pathway                 | TGCT | 0.671407655  |
| CDA | P53_signaling_pathway       | TGCT | 0.443589445  |
| CDA | Pantothenate and coa bios   | TGCT | 0.356771281  |
| CDA | Pentose and glucuronate i   | TGCT | -0.00348163  |
| CDA | Pentose phosphate pathwa    | TGCT | 0.558297643  |

|     |                            |      |              |
|-----|----------------------------|------|--------------|
| CDA | Pericyte                   | TGCT | 0.023341711  |
| CDA | Phenylalanine metabolism   | TGCT | 0.374048651  |
| CDA | Phenylalanine, tyrosine ar | TGCT | 0.41949209   |
| CDA | Phosphonate and phosphir   | TGCT | 0.492849669  |
| CDA | Pi3k_akt_activation        | TGCT | -0.269771512 |
| CDA | Pi3k_akt_mtor_signaling    | TGCT | 0.401701277  |
| CDA | Porphyrin and chlorophyl   | TGCT | 0.13708001   |
| CDA | Primary bile acid biosynt  | TGCT | 0.027804642  |
| CDA | Propanoate metabolism      | TGCT | -0.066147212 |
| CDA | Purine metabolism          | TGCT | 0.277919599  |
| CDA | Pyrimidine metabolism      | TGCT | 0.284667728  |
| CDA | Pyruvate metabolism        | TGCT | 0.514581132  |
| CDA | Regulation_of_autophagy    | TGCT | 0.166465879  |
| CDA | Retinol metabolism         | TGCT | -0.099780798 |
| CDA | Riboflavin metabolism      | TGCT | 0.436942096  |
| CDA | Schmahl_pdgf_signaling     | TGCT | -0.267096099 |
| CDA | Selenocompound metabol     | TGCT | 0.250635566  |
| CDA | Signaling_by_hippo         | TGCT | -0.159922874 |
| CDA | Sphingolipid metabolism    | TGCT | -0.043935163 |
| CDA | Starch and sucrose metabo  | TGCT | 0.540932159  |
| CDA | Steroid biosynthesis       | TGCT | 0.269000118  |
| CDA | Steroid hormone biosynth   | TGCT | 0.103751802  |
| CDA | Sulfur metabolism          | TGCT | 0.066319591  |
| CDA | Synthesis and degradation  | TGCT | 0.128545839  |
| CDA | T helper cell              | TGCT | 0.099063704  |
| CDA | T helper1 (th1) cell       | TGCT | 0.213080912  |
| CDA | T helper17 (th17) cell     | TGCT | 0.131357586  |
| CDA | T helper2 (th2) cell       | TGCT | 0.283017572  |
| CDA | T helper9 (th9) cell       | TGCT | 0.122355541  |
| CDA | Taurine and hypotaurine r  | TGCT | -0.064105941 |
| CDA | Terpenoid backbone biosy   | TGCT | 0.27882861   |
| CDA | Tgf_beta_signaling_pathw   | TGCT | -0.106798313 |
| CDA | Thiamine metabolism        | TGCT | 0.338739471  |
| CDA | Tnfa_signaling_via_nfkb    | TGCT | 0.434531221  |
| CDA | Tryptophan metabolism      | TGCT | 0.237161279  |
| CDA | Tumor endothelial cell     | TGCT | -0.050114259 |
| CDA | Tyrosine metabolism        | TGCT | 0.021049793  |
| CDA | Ubiquinone and other terp  | TGCT | 0.105727181  |
| CDA | Valine, leucine and isoleu | TGCT | 0.409043613  |
| CDA | Valine, leucine and isoleu | TGCT | 0.081492526  |
| CDA | Vascular endothelial cell  | TGCT | -0.038804304 |
| CDA | Vascular smooth muscle c   | TGCT | -0.083180513 |
| CDA | Vegf_signaling_pathway     | TGCT | -0.001468407 |

|      |                            |      |              |
|------|----------------------------|------|--------------|
| CDA  | Vitamin b6 metabolism      | TGCT | 0.270077405  |
| CDA  | Willert_wnt_signaling      | TGCT | 0.326967984  |
| CDA  | Wnt_beta_catenin_signali   | TGCT | 0.07284766   |
| UCK1 | Abnormal plasma cell       | TGCT | -0.122931343 |
| UCK1 | Activated b cell           | TGCT | 0.070309959  |
| UCK1 | Activated cd4+ t cell      | TGCT | -0.087825303 |
| UCK1 | Activated t cell           | TGCT | -0.00492085  |
| UCK1 | Alanine, aspartate and glu | TGCT | 0.065963107  |
| UCK1 | Alcala_apoptosis           | TGCT | 0.144465644  |
| UCK1 | Alpha-linolenic acid meta  | TGCT | 0.06722198   |
| UCK1 | Amino sugar and nucleoti   | TGCT | 0.086709829  |
| UCK1 | Ampk_pathway               | TGCT | -0.067477079 |
| UCK1 | Angiogenesis               | TGCT | 0.009791253  |
| UCK1 | Arachidonic acid metabol   | TGCT | 0.032352037  |
| UCK1 | Arginine and proline metæ  | TGCT | 0.186877199  |
| UCK1 | Arginine biosynthesis      | TGCT | 0.056466733  |
| UCK1 | Ascorbate and aldarate mε  | TGCT | 0.055959734  |
| UCK1 | Atypical memory b cell     | TGCT | -0.063991457 |
| UCK1 | Axl+siglecc6+ dendritic ce | TGCT | -0.142568035 |
| UCK1 | B cell                     | TGCT | -0.050957017 |
| UCK1 | B1 cell                    | TGCT | -0.043622306 |
| UCK1 | Basal cell                 | TGCT | 0.003964432  |
| UCK1 | Beta-alanine metabolism    | TGCT | 0.167729093  |
| UCK1 | Biosynthesis of unsaturate | TGCT | 0.10882584   |
| UCK1 | Biotin metabolism          | TGCT | 0.032692967  |
| UCK1 | Butanoate metabolism       | TGCT | 0.163454409  |
| UCK1 | Caffeine metabolism        | TGCT | 0.012448454  |
| UCK1 | Cancer stem cell           | TGCT | -0.099932635 |
| UCK1 | Cancer stem-like cell      | TGCT | -0.206393721 |
| UCK1 | Cd4+ cytotoxic t cell      | TGCT | 0.012865589  |
| UCK1 | Cd4+ memory t cell         | TGCT | -0.015976573 |
| UCK1 | Cd4+ regulatory t cell     | TGCT | -0.041917939 |
| UCK1 | Cd4+ t helper cell         | TGCT | -0.04944284  |
| UCK1 | Cd4+cd25+ regulatory t c   | TGCT | -0.050979941 |
| UCK1 | Cd8+ cytotoxic t cell      | TGCT | 0.024775823  |
| UCK1 | Cd8+ regulatory t cell     | TGCT | -0.045434234 |
| UCK1 | Cell_cycle                 | TGCT | 0.042453719  |
| UCK1 | Chandran_metastasis_top5   | TGCT | -0.179298235 |
| UCK1 | Citrate cycle (tca cycle)  | TGCT | 0.176231365  |
| UCK1 | Cysteine and methionine r  | TGCT | 0.222056419  |
| UCK1 | Cytokine induced killer cε | TGCT | -0.025913028 |
| UCK1 | D-arginine and d-ornithin  | TGCT | 0.024436658  |
| UCK1 | D-glutamine and d-glutan   | TGCT | -0.134758378 |

|      |                              |       |              |
|------|------------------------------|-------|--------------|
| UCK1 | Dendritic cell               | TGCT  | -0.091273205 |
| UCK1 | Dna_repair                   | TGCT  | 0.340802114  |
| UCK1 | Dna_replication              | TGCT  | 0.230725484  |
| UCK1 | Double-negative memory       | TGCT  | 0.09887197   |
| UCK1 | Drug metabolism - cytoch     | TGCT  | 0.039804469  |
| UCK1 | Drug metabolism - other      | TGCT  | 0.31171702   |
| UCK1 | E2f_targets                  | TGCT  | 0.105182065  |
| UCK1 | Ecm_receptor_interaction     | TGCT  | -0.124253459 |
| UCK1 | Effector cd4+ memory t       | (TGCT | -0.124890628 |
| UCK1 | Effector cd8+ memory t       | (TGCT | -0.060497587 |
| UCK1 | Effector memory t cell       | TGCT  | -0.024219751 |
| UCK1 | Effector regulatory t (treg  | TGCT  | -0.152909638 |
| UCK1 | Elvidge_hif1a_targets_up     | TGCT  | -0.039204007 |
| UCK1 | Endothelial cell             | TGCT  | -0.024594481 |
| UCK1 | Eosinophil                   | TGCT  | -0.090298631 |
| UCK1 | Ether lipid metabolism       | TGCT  | -0.091982968 |
| UCK1 | Exhausted cd4+ t cell        | TGCT  | -0.12053044  |
| UCK1 | Exhausted cd8+ t cell        | TGCT  | -0.045428368 |
| UCK1 | Exhausted t cell             | TGCT  | 0.077653512  |
| UCK1 | Fat cell (adipocyte)         | TGCT  | 0.209322871  |
| UCK1 | Fatty acid biosynthesis      | TGCT  | -0.088126035 |
| UCK1 | Fatty acid degradation       | TGCT  | 0.046011613  |
| UCK1 | Fatty acid elongation        | TGCT  | 0.05601593   |
| UCK1 | Fibroblast                   | TGCT  | -0.111092301 |
| UCK1 | Folate biosynthesis          | TGCT  | 0.287916543  |
| UCK1 | Follicular b cell            | TGCT  | -0.042373982 |
| UCK1 | Follicular dendritic cell    | TGCT  | -0.0773289   |
| UCK1 | Follicular helper (tfh) t ce | TGCT  | -0.081167437 |
| UCK1 | Follicular t cell            | TGCT  | 0.12372398   |
| UCK1 | Foxp3+il-17+ t cell          | TGCT  | 0.015052054  |
| UCK1 | Fructose and mannose me      | TGCT  | 0.055545158  |
| UCK1 | G2m_checkpoint               | TGCT  | -0.012889023 |
| UCK1 | Galactose metabolism         | TGCT  | 0.112301305  |
| UCK1 | Galie_tumor_stemness_ge      | TGCT  | -0.101082882 |
| UCK1 | Glutathione metabolism       | TGCT  | 0.206534646  |
| UCK1 | Glycerolipid metabolism      | TGCT  | -0.022946358 |
| UCK1 | Glycerophospholipid metæ     | TGCT  | 0.156702915  |
| UCK1 | Glycine, serine and threor   | TGCT  | 0.253105144  |
| UCK1 | Glycolysis / gluconeogene    | TGCT  | 0.105722059  |
| UCK1 | Glycosaminoglycan biosy      | TGCT  | 0.180576243  |
| UCK1 | Glycosaminoglycan biosy      | TGCT  | 0.131360011  |
| UCK1 | Glycosaminoglycan biosy      | TGCT  | -0.096476316 |
| UCK1 | Glycosaminoglycan degra      | TGCT  | -0.075962779 |



|      |                           |      |              |
|------|---------------------------|------|--------------|
| UCK1 | Glycosphingolipid biosyn  | TGCT | -0.170228984 |
| UCK1 | Glycosphingolipid biosyn  | TGCT | -0.028960923 |
| UCK1 | Glycosphingolipid biosyn  | TGCT | 0.128093276  |
| UCK1 | Glycosylphosphatidylinos  | TGCT | 0.243348364  |
| UCK1 | Glyoxylate and dicarboxy  | TGCT | 0.285745024  |
| UCK1 | Granulocyte               | TGCT | -0.128163633 |
| UCK1 | Hedgehog_signaling        | TGCT | -0.108545214 |
| UCK1 | Histidine metabolism      | TGCT | 0.052154654  |
| UCK1 | Hypoxia                   | TGCT | 0.011006463  |
| UCK1 | Il-17alpha t cell         | TGCT | -0.027124586 |
| UCK1 | Il2_stat5_signaling       | TGCT | -0.033823063 |
| UCK1 | Il6_jak_stat3_signaling   | TGCT | -0.140854219 |
| UCK1 | Immune_checkpoints_tun    | TGCT | -0.095551565 |
| UCK1 | Immune_inhibition_cytok   | TGCT | 0.034124874  |
| UCK1 | Inositol phosphate metabo | TGCT | -0.384715631 |
| UCK1 | Interleukin_6_signaling   | TGCT | -0.405086576 |
| UCK1 | Jaeger_metastasis_up      | TGCT | 0.082707605  |
| UCK1 | Jain_nfkb_signaling       | TGCT | 0.129712131  |
| UCK1 | Kras_signaling_up         | TGCT | -0.189398782 |
| UCK1 | Linoleic acid metabolism  | TGCT | -0.005863742 |
| UCK1 | Lipoic acid metabolism    | TGCT | -0.042779053 |
| UCK1 | Lysine degradation        | TGCT | 0.030547964  |
| UCK1 | Lysosome                  | TGCT | -0.094846213 |
| UCK1 | M1 macrophage             | TGCT | -0.061428694 |
| UCK1 | M2 macrophage             | TGCT | -0.044590253 |
| UCK1 | Mannose type o-glycan bi  | TGCT | 0.135757237  |
| UCK1 | Mapk_signaling_pathway    | TGCT | -0.223623776 |
| UCK1 | Mapk3_erk1_activation     | TGCT | -0.461169609 |
| UCK1 | Marginal zone b cell      | TGCT | -0.188929407 |
| UCK1 | Memory b cell             | TGCT | -0.030289135 |
| UCK1 | Mesenchymal cell          | TGCT | 0.008743582  |
| UCK1 | Mesenchymal stem cell     | TGCT | -0.226009571 |
| UCK1 | Metabolism of xenobiotic  | TGCT | 0.090324236  |
| UCK1 | Migrating cancer stem cel | TGCT | -0.133911209 |
| UCK1 | Mitotic_spindle           | TGCT | -0.377389299 |
| UCK1 | Monocyte                  | TGCT | 0.000918404  |
| UCK1 | Mtor_signaling_pathway    | TGCT | -0.377729659 |
| UCK1 | Mtorc1_signaling          | TGCT | 0.082956891  |
| UCK1 | Mucin type o-glycan biosy | TGCT | -0.278625326 |
| UCK1 | Myc_targets_v1            | TGCT | 0.188507873  |
| UCK1 | Myeloid cell              | TGCT | -0.121205398 |
| UCK1 | N-glycan biosynthesis     | TGCT | 0.140182002  |
| UCK1 | Naive b cell              | TGCT | 0.145921141  |

|      |                             |      |              |
|------|-----------------------------|------|--------------|
| UCK1 | Naive cd4+ t cell           | TGCT | -0.177116564 |
| UCK1 | Naive cd8+ t cell           | TGCT | -0.135941998 |
| UCK1 | Natural killer cell         | TGCT | -0.024776845 |
| UCK1 | Natural killer t (nkt) cell | TGCT | 0.069879362  |
| UCK1 | Natural regulatory t (treg) | TGCT | -0.105146589 |
| UCK1 | Neomycin, kanamycin and     | TGCT | -0.083081415 |
| UCK1 | Neutrophil                  | TGCT | -0.057206302 |
| UCK1 | Nicotinate and nicotinami   | TGCT | 0.00871926   |
| UCK1 | Nitrogen metabolism         | TGCT | -0.169051315 |
| UCK1 | Nod_like_receptor_signal    | TGCT | -0.179713705 |
| UCK1 | Notch_signaling             | TGCT | 0.063586663  |
| UCK1 | One carbon pool by folate   | TGCT | 0.010201356  |
| UCK1 | Other glycan degradation    | TGCT | -0.004688787 |
| UCK1 | Other types of o-glycan b   | TGCT | 0.097945623  |
| UCK1 | Oxidative phosphorylatio    | TGCT | 0.351995864  |
| UCK1 | P53_pathway                 | TGCT | 0.177788554  |
| UCK1 | P53_signaling_pathway       | TGCT | 0.040152414  |
| UCK1 | Pantothenate and coa bios   | TGCT | 0.084159954  |
| UCK1 | Pentose and glucuronate i   | TGCT | 0.032785832  |
| UCK1 | Pentose phosphate pathwa    | TGCT | 0.180829763  |
| UCK1 | Pericyte                    | TGCT | -0.02192947  |
| UCK1 | Phenylalanine metabolism    | TGCT | 0.224296387  |
| UCK1 | Phenylalanine, tyrosine ar  | TGCT | 0.291773935  |
| UCK1 | Phosphonate and phosphir    | TGCT | 0.122354204  |
| UCK1 | Pi3k_akt_activation         | TGCT | -0.141772409 |
| UCK1 | Pi3k_akt_mtor_signaling     | TGCT | 0.025161429  |
| UCK1 | Porphyrin and chlorophyl    | TGCT | 0.233270818  |
| UCK1 | Primary bile acid biosynt   | TGCT | 0.089851174  |
| UCK1 | Propanoate metabolism       | TGCT | -0.070143201 |
| UCK1 | Purine metabolism           | TGCT | 0.23480893   |
| UCK1 | Pyrimidine metabolism       | TGCT | 0.214961121  |
| UCK1 | Pyruvate metabolism         | TGCT | 0.265158934  |
| UCK1 | Regulation_of_autophagy     | TGCT | -0.06140291  |
| UCK1 | Retinol metabolism          | TGCT | -0.021346578 |
| UCK1 | Riboflavin metabolism       | TGCT | 0.221263686  |
| UCK1 | Schmahl_pdgf_signaling      | TGCT | -0.134832428 |
| UCK1 | Selenocompound metabol      | TGCT | -0.046239681 |
| UCK1 | Signaling_by_hippo          | TGCT | -0.125063721 |
| UCK1 | Sphingolipid metabolism     | TGCT | -0.041070724 |
| UCK1 | Starch and sucrose metabo   | TGCT | -0.110387999 |
| UCK1 | Steroid biosynthesis        | TGCT | 0.056321445  |
| UCK1 | Steroid hormone biosynth    | TGCT | 0.050693811  |
| UCK1 | Sulfur metabolism           | TGCT | 0.081406417  |

|      |                            |      |              |
|------|----------------------------|------|--------------|
| UCK1 | Synthesis and degradation  | TGCT | 0.240846487  |
| UCK1 | T helper cell              | TGCT | -0.062318964 |
| UCK1 | T helper1 (th1) cell       | TGCT | -0.005730157 |
| UCK1 | T helper17 (th17) cell     | TGCT | -0.073850663 |
| UCK1 | T helper2 (th2) cell       | TGCT | 0.042952605  |
| UCK1 | T helper9 (th9) cell       | TGCT | 0.051328569  |
| UCK1 | Taurine and hypotaurine r  | TGCT | 0.219717451  |
| UCK1 | Terpenoid backbone biosy   | TGCT | 0.126444979  |
| UCK1 | Tgf_beta_signaling_pathw   | TGCT | -0.100476358 |
| UCK1 | Thiamine metabolism        | TGCT | 0.352602049  |
| UCK1 | Tnfa_signaling_via_nfk     | TGCT | -0.02474414  |
| UCK1 | Tryptophan metabolism      | TGCT | 0.221536743  |
| UCK1 | Tumor endothelial cell     | TGCT | -0.069361062 |
| UCK1 | Tyrosine metabolism        | TGCT | 0.102529564  |
| UCK1 | Ubiquinone and other ter   | TGCT | 0.13760723   |
| UCK1 | Valine, leucine and isoleu | TGCT | 0.284552505  |
| UCK1 | Valine, leucine and isoleu | TGCT | 0.181685043  |
| UCK1 | Vascular endothelial cell  | TGCT | 0.04358853   |
| UCK1 | Vascular smooth muscle c   | TGCT | -0.150868434 |
| UCK1 | Vegf_signaling_pathway     | TGCT | -0.18290946  |
| UCK1 | Vitamin b6 metabolism      | TGCT | 0.134653598  |
| UCK1 | Willert_wnt_signaling      | TGCT | 0.274119359  |
| UCK1 | Wnt_beta_catenin_signali   | TGCT | -0.034850313 |
| UCK2 | Abnormal plasma cell       | TGCT | -0.182996498 |
| UCK2 | Activated b cell           | TGCT | -0.269094461 |
| UCK2 | Activated cd4+ t cell      | TGCT | -0.392659782 |
| UCK2 | Activated t cell           | TGCT | -0.388145309 |
| UCK2 | Alanine, aspartate and glu | TGCT | 0.630514872  |
| UCK2 | Alcala_apoptosis           | TGCT | 0.189766578  |
| UCK2 | Alpha-linolenic acid meta  | TGCT | -0.026906807 |
| UCK2 | Amino sugar and nucleoti   | TGCT | 0.510071462  |
| UCK2 | Ampk_pathway               | TGCT | 0.148830061  |
| UCK2 | Angiogenesis               | TGCT | 0.371398781  |
| UCK2 | Arachidonic acid metabol   | TGCT | 0.056760932  |
| UCK2 | Arginine and proline meta  | TGCT | 0.63887758   |
| UCK2 | Arginine biosynthesis      | TGCT | 0.567460583  |
| UCK2 | Ascorbate and aldarate m   | TGCT | 0.35413535   |
| UCK2 | Atypical memory b cell     | TGCT | -0.534931317 |
| UCK2 | Axl+siglec6+ dendritic ce  | TGCT | -0.135020246 |
| UCK2 | B cell                     | TGCT | -0.338577375 |
| UCK2 | B1 cell                    | TGCT | -0.418113375 |
| UCK2 | Basal cell                 | TGCT | 0.21592641   |
| UCK2 | Beta-alanine metabolism    | TGCT | 0.307143061  |

|      |                                         |      |              |
|------|-----------------------------------------|------|--------------|
| UCK2 | Biosynthesis of unsaturated fatty acids | TGCT | 0.203202784  |
| UCK2 | Biotin metabolism                       | TGCT | -0.239976988 |
| UCK2 | Butanoate metabolism                    | TGCT | 0.404290468  |
| UCK2 | Caffeine metabolism                     | TGCT | 0.253577615  |
| UCK2 | Cancer stem cell                        | TGCT | 0.275703396  |
| UCK2 | Cancer stem-like cell                   | TGCT | -0.136096532 |
| UCK2 | Cd4+ cytotoxic t cell                   | TGCT | -0.297634452 |
| UCK2 | Cd4+ memory t cell                      | TGCT | -0.423933554 |
| UCK2 | Cd4+ regulatory t cell                  | TGCT | -0.269855965 |
| UCK2 | Cd4+ t helper cell                      | TGCT | -0.397699183 |
| UCK2 | Cd4+cd25+ regulatory t cell             | TGCT | -0.388410621 |
| UCK2 | Cd8+ cytotoxic t cell                   | TGCT | -0.315414713 |
| UCK2 | Cd8+ regulatory t cell                  | TGCT | -0.403981688 |
| UCK2 | Cell_cycle                              | TGCT | 0.288876551  |
| UCK2 | Chandran_metastasis_top5                | TGCT | 0.100758465  |
| UCK2 | Citrate cycle (tca cycle)               | TGCT | 0.522476372  |
| UCK2 | Cysteine and methionine metabolism      | TGCT | 0.61702972   |
| UCK2 | Cytokine induced killer cell            | TGCT | -0.431400324 |
| UCK2 | D-arginine and d-ornithine              | TGCT | 0.243762923  |
| UCK2 | D-glutamine and d-glutamate             | TGCT | 0.333128374  |
| UCK2 | Dendritic cell                          | TGCT | -0.263561675 |
| UCK2 | Dna_repair                              | TGCT | 0.351466621  |
| UCK2 | Dna_replication                         | TGCT | 0.266500696  |
| UCK2 | Double-negative memory t cell           | TGCT | -0.415006317 |
| UCK2 | Drug metabolism - cytochrome p450       | TGCT | 0.126828329  |
| UCK2 | Drug metabolism - other cytochrome p450 | TGCT | 0.558274135  |
| UCK2 | E2f_targets                             | TGCT | 0.304376733  |
| UCK2 | Ecm_receptor_interaction                | TGCT | 0.162416231  |
| UCK2 | Effector cd4+ memory t cell             | TGCT | -0.398468005 |
| UCK2 | Effector cd8+ memory t cell             | TGCT | -0.225809251 |
| UCK2 | Effector memory t cell                  | TGCT | -0.385280325 |
| UCK2 | Effector regulatory t (treg) cell       | TGCT | -0.373889354 |
| UCK2 | Elvidge_hif1a_targets_up                | TGCT | -0.004589577 |
| UCK2 | Endothelial cell                        | TGCT | 0.216161102  |
| UCK2 | Eosinophil                              | TGCT | -0.22052017  |
| UCK2 | Ether lipid metabolism                  | TGCT | -0.201534567 |
| UCK2 | Exhausted cd4+ t cell                   | TGCT | -0.356745945 |
| UCK2 | Exhausted cd8+ t cell                   | TGCT | -0.237089915 |
| UCK2 | Exhausted t cell                        | TGCT | -0.306518081 |
| UCK2 | Fat cell (adipocyte)                    | TGCT | 0.198673109  |
| UCK2 | Fatty acid biosynthesis                 | TGCT | -0.081545368 |
| UCK2 | Fatty acid degradation                  | TGCT | 0.009410793  |
| UCK2 | Fatty acid elongation                   | TGCT | -0.031218314 |

|      |                              |      |              |
|------|------------------------------|------|--------------|
| UCK2 | Fibroblast                   | TGCT | 0.02705741   |
| UCK2 | Folate biosynthesis          | TGCT | 0.238613569  |
| UCK2 | Follicular b cell            | TGCT | -0.372280928 |
| UCK2 | Follicular dendritic cell    | TGCT | -0.416778368 |
| UCK2 | Follicular helper (tfh) t ce | TGCT | -0.4294761   |
| UCK2 | Follicular t cell            | TGCT | -0.320597609 |
| UCK2 | Foxp3+il-17+ t cell          | TGCT | -0.218803205 |
| UCK2 | Fructose and mannose me      | TGCT | 0.427587552  |
| UCK2 | G2m_checkpoint               | TGCT | 0.290721476  |
| UCK2 | Galactose metabolism         | TGCT | 0.555661747  |
| UCK2 | Galie_tumor_stemness_ge      | TGCT | 0.179609157  |
| UCK2 | Glutathione metabolism       | TGCT | 0.60243662   |
| UCK2 | Glycerolipid metabolism      | TGCT | 0.041834246  |
| UCK2 | Glycerophospholipid metæ     | TGCT | 0.025396651  |
| UCK2 | Glycine, serine and threor   | TGCT | 0.605742104  |
| UCK2 | Glycolysis / gluconeogene    | TGCT | 0.637981287  |
| UCK2 | Glycosaminoglycan biosy1     | TGCT | 0.355898061  |
| UCK2 | Glycosaminoglycan biosy1     | TGCT | 0.292960728  |
| UCK2 | Glycosaminoglycan biosy1     | TGCT | 0.024897497  |
| UCK2 | Glycosaminoglycan degra      | TGCT | -0.016970208 |
| UCK2 | Glycosphingolipid biosyn1    | TGCT | -0.434138203 |
| UCK2 | Glycosphingolipid biosyn1    | TGCT | 0.31480999   |
| UCK2 | Glycosphingolipid biosyn1    | TGCT | 0.317484715  |
| UCK2 | Glycosylphosphatidylinos:    | TGCT | 0.199858415  |
| UCK2 | Glyoxylate and dicarboxy     | TGCT | 0.517338372  |
| UCK2 | Granulocyte                  | TGCT | -0.173052598 |
| UCK2 | Hedgehog_signaling           | TGCT | 0.214612015  |
| UCK2 | Histidine metabolism         | TGCT | 0.121037465  |
| UCK2 | Hypoxia                      | TGCT | 0.539726609  |
| UCK2 | Il-17ralpha t cell           | TGCT | -0.414768507 |
| UCK2 | Il2_stat5_signaling          | TGCT | 0.092724764  |
| UCK2 | Il6_jak_stat3_signaling      | TGCT | -0.166555868 |
| UCK2 | Immune_checkpoints_tunr      | TGCT | -0.316601317 |
| UCK2 | Immune_inhibition_cytok      | TGCT | -0.024819007 |
| UCK2 | Inositol phosphate metabo    | TGCT | -0.468515187 |
| UCK2 | Interleukin_6_signaling      | TGCT | -0.461999312 |
| UCK2 | Jaeger_metastasis_up         | TGCT | 0.676640884  |
| UCK2 | Jain_nfkb_signaling          | TGCT | 0.3697325    |
| UCK2 | Kras_signaling_up            | TGCT | -0.122611974 |
| UCK2 | Linoleic acid metabolism     | TGCT | -0.195368253 |
| UCK2 | Lipoic acid metabolism       | TGCT | -0.126247754 |
| UCK2 | Lysine degradation           | TGCT | 0.130110466  |
| UCK2 | Lysosome                     | TGCT | -0.194794028 |

|      |                             |      |              |
|------|-----------------------------|------|--------------|
| UCK2 | M1 macrophage               | TGCT | -0.162466174 |
| UCK2 | M2 macrophage               | TGCT | -0.02815293  |
| UCK2 | Mannose type o-glycan bi    | TGCT | -0.330291303 |
| UCK2 | Mapk_signaling_pathway      | TGCT | 0.23760381   |
| UCK2 | Mapk3_erk1_activation       | TGCT | -0.454477028 |
| UCK2 | Marginal zone b cell        | TGCT | -0.423678978 |
| UCK2 | Memory b cell               | TGCT | -0.364655722 |
| UCK2 | Mesenchymal cell            | TGCT | 0.232932713  |
| UCK2 | Mesenchymal stem cell       | TGCT | 0.046417612  |
| UCK2 | Metabolism of xenobiotic    | TGCT | 0.203242416  |
| UCK2 | Migrating cancer stem cel   | TGCT | 0.307036412  |
| UCK2 | Mitotic_spindle             | TGCT | -0.194612734 |
| UCK2 | Monocyte                    | TGCT | -0.060740938 |
| UCK2 | Mtor_signaling_pathway      | TGCT | -0.494461435 |
| UCK2 | Mtorc1_signaling            | TGCT | 0.519123008  |
| UCK2 | Mucin type o-glycan biosy   | TGCT | -0.127028733 |
| UCK2 | Myc_targets_v1              | TGCT | 0.374279792  |
| UCK2 | Myeloid cell                | TGCT | -0.306314434 |
| UCK2 | N-glycan biosynthesis       | TGCT | 0.173409967  |
| UCK2 | Naive b cell                | TGCT | -0.074115368 |
| UCK2 | Naive cd4+ t cell           | TGCT | -0.399272782 |
| UCK2 | Naive cd8+ t cell           | TGCT | -0.353224908 |
| UCK2 | Natural killer cell         | TGCT | -0.372135506 |
| UCK2 | Natural killer t (nkt) cell | TGCT | -0.118187677 |
| UCK2 | Natural regulatory t (treg) | TGCT | -0.442496441 |
| UCK2 | Neomycin, kanamycin and     | TGCT | 0.400614193  |
| UCK2 | Neutrophil                  | TGCT | 0.003150558  |
| UCK2 | Nicotinate and nicotinami   | TGCT | -0.055839897 |
| UCK2 | Nitrogen metabolism         | TGCT | 0.241526813  |
| UCK2 | Nod_like_receptor_signal    | TGCT | -0.164682038 |
| UCK2 | Notch_signaling             | TGCT | 0.371419759  |
| UCK2 | One carbon pool by folate   | TGCT | 0.432097226  |
| UCK2 | Other glycan degradation    | TGCT | 0.018404827  |
| UCK2 | Other types of o-glycan b   | TGCT | -0.095327338 |
| UCK2 | Oxidative phosphorylatio    | TGCT | 0.355485842  |
| UCK2 | P53_pathway                 | TGCT | 0.441698003  |
| UCK2 | P53_signaling_pathway       | TGCT | 0.577737802  |
| UCK2 | Pantothenate and coa bios   | TGCT | 0.034473904  |
| UCK2 | Pentose and glucuronate i   | TGCT | 0.245221999  |
| UCK2 | Pentose phosphate pathwa    | TGCT | 0.528682672  |
| UCK2 | Pericyte                    | TGCT | 0.203969063  |
| UCK2 | Phenylalanine metabolism    | TGCT | 0.219566277  |
| UCK2 | Phenylalanine, tyrosine ar  | TGCT | 0.424535431  |

|      |                            |      |              |
|------|----------------------------|------|--------------|
| UCK2 | Phosphonate and phosphir   | TGCT | 0.379078767  |
| UCK2 | Pi3k_akt_activation        | TGCT | 0.026428505  |
| UCK2 | Pi3k_akt_mtor_signaling    | TGCT | 0.271566674  |
| UCK2 | Porphyrin and chlorophyl   | TGCT | 0.254150634  |
| UCK2 | Primary bile acid biosynt  | TGCT | -0.04207531  |
| UCK2 | Propanoate metabolism      | TGCT | -0.001987879 |
| UCK2 | Purine metabolism          | TGCT | 0.523755698  |
| UCK2 | Pyrimidine metabolism      | TGCT | 0.37328302   |
| UCK2 | Pyruvate metabolism        | TGCT | 0.591899764  |
| UCK2 | Regulation_of_autophagy    | TGCT | -0.239989457 |
| UCK2 | Retinol metabolism         | TGCT | -0.006346419 |
| UCK2 | Riboflavin metabolism      | TGCT | 0.067207948  |
| UCK2 | Schmahl_pdgf_signaling     | TGCT | -0.358814178 |
| UCK2 | Selenocompound metabol     | TGCT | 0.161956022  |
| UCK2 | Signaling_by_hippo         | TGCT | 0.276438795  |
| UCK2 | Sphingolipid metabolism    | TGCT | 0.012540898  |
| UCK2 | Starch and sucrose metab   | TGCT | 0.258501303  |
| UCK2 | Steroid biosynthesis       | TGCT | 0.015836765  |
| UCK2 | Steroid hormone biosynth   | TGCT | 0.180093439  |
| UCK2 | Sulfur metabolism          | TGCT | 0.236144316  |
| UCK2 | Synthesis and degradation  | TGCT | 0.371045359  |
| UCK2 | T helper cell              | TGCT | -0.368944332 |
| UCK2 | T helper1 (th1) cell       | TGCT | -0.272343114 |
| UCK2 | T helper17 (th17) cell     | TGCT | -0.344606458 |
| UCK2 | T helper2 (th2) cell       | TGCT | -0.143422309 |
| UCK2 | T helper9 (th9) cell       | TGCT | -0.266484389 |
| UCK2 | Taurine and hypotaurine r  | TGCT | 0.06328163   |
| UCK2 | Terpenoid backbone biosy   | TGCT | 0.240836001  |
| UCK2 | Tgf_beta_signaling_pathw   | TGCT | 0.293658675  |
| UCK2 | Thiamine metabolism        | TGCT | 0.15340885   |
| UCK2 | Tnfa_signaling_via_nfkb    | TGCT | 0.091134839  |
| UCK2 | Tryptophan metabolism      | TGCT | 0.144186443  |
| UCK2 | Tumor endothelial cell     | TGCT | -0.14276752  |
| UCK2 | Tyrosine metabolism        | TGCT | 0.010244036  |
| UCK2 | Ubiquinone and other ter   | TGCT | 0.037262265  |
| UCK2 | Valine, leucine and isoleu | TGCT | 0.569397691  |
| UCK2 | Valine, leucine and isoleu | TGCT | 0.32979966   |
| UCK2 | Vascular endothelial cell  | TGCT | 0.037706564  |
| UCK2 | Vascular smooth muscle c   | TGCT | -0.021841196 |
| UCK2 | Vegf_signaling_pathway     | TGCT | -0.212815775 |
| UCK2 | Vitamin b6 metabolism      | TGCT | 0.312932118  |
| UCK2 | Willert_wnt_signaling      | TGCT | 0.62966234   |
| UCK2 | Wnt_beta_catenin_signali   | TGCT | 0.408643446  |

|       |                            |      |              |
|-------|----------------------------|------|--------------|
| UCKL1 | Abnormal plasma cell       | TGCT | -0.354647381 |
| UCKL1 | Activated b cell           | TGCT | -0.122746927 |
| UCKL1 | Activated cd4+ t cell      | TGCT | -0.239118541 |
| UCKL1 | Activated t cell           | TGCT | -0.209424335 |
| UCKL1 | Alanine, aspartate and glu | TGCT | 0.426381442  |
| UCKL1 | Alcala_apoptosis           | TGCT | 0.231359918  |
| UCKL1 | Alpha-linolenic acid meta  | TGCT | -0.030212811 |
| UCKL1 | Amino sugar and nucleoti   | TGCT | 0.359418392  |
| UCKL1 | Ampk_pathway               | TGCT | 0.1313949    |
| UCKL1 | Angiogenesis               | TGCT | -0.022670187 |
| UCKL1 | Arachidonic acid metabol   | TGCT | 0.012466365  |
| UCKL1 | Arginine and proline metæ  | TGCT | 0.445851199  |
| UCKL1 | Arginine biosynthesis      | TGCT | 0.262085852  |
| UCKL1 | Ascorbate and aldarate mε  | TGCT | 0.066315606  |
| UCKL1 | Atypical memory b cell     | TGCT | -0.246269272 |
| UCKL1 | Axl+siglec6+ dendritic ce  | TGCT | -0.246535621 |
| UCKL1 | B cell                     | TGCT | -0.25685834  |
| UCKL1 | B1 cell                    | TGCT | -0.231265958 |
| UCKL1 | Basal cell                 | TGCT | -0.025693835 |
| UCKL1 | Beta-alanine metabolism    | TGCT | 0.049039934  |
| UCKL1 | Biosynthesis of unsaturate | TGCT | 0.024029817  |
| UCKL1 | Biotin metabolism          | TGCT | -0.136720378 |
| UCKL1 | Butanoate metabolism       | TGCT | 0.180378187  |
| UCKL1 | Caffeine metabolism        | TGCT | 0.116547303  |
| UCKL1 | Cancer stem cell           | TGCT | -0.200173313 |
| UCKL1 | Cancer stem-like cell      | TGCT | -0.467928578 |
| UCKL1 | Cd4+ cytotoxic t cell      | TGCT | -0.2037816   |
| UCKL1 | Cd4+ memory t cell         | TGCT | -0.184606251 |
| UCKL1 | Cd4+ regulatory t cell     | TGCT | -0.21612731  |
| UCKL1 | Cd4+ t helper cell         | TGCT | -0.23288092  |
| UCKL1 | Cd4+cd25+ regulatory t c   | TGCT | -0.231868033 |
| UCKL1 | Cd8+ cytotoxic t cell      | TGCT | -0.123578176 |
| UCKL1 | Cd8+ regulatory t cell     | TGCT | -0.200614871 |
| UCKL1 | Cell_cycle                 | TGCT | 0.218665292  |
| UCKL1 | Chandran_metastasis_top5   | TGCT | 0.079062663  |
| UCKL1 | Citrate cycle (tca cycle)  | TGCT | 0.440792494  |
| UCKL1 | Cysteine and methionine r  | TGCT | 0.501777705  |
| UCKL1 | Cytokine induced killer α  | TGCT | -0.343634705 |
| UCKL1 | D-arginine and d-ornithin  | TGCT | 0.035467402  |
| UCKL1 | D-glutamine and d-glutan   | TGCT | 0.161889455  |
| UCKL1 | Dendritic cell             | TGCT | -0.28388064  |
| UCKL1 | Dna_repair                 | TGCT | 0.510045752  |
| UCKL1 | Dna_replication            | TGCT | 0.331016226  |



|       |                                   |              |
|-------|-----------------------------------|--------------|
| UCKL1 | Double-negative memory TGCT       | -0.053899275 |
| UCKL1 | Drug metabolism - cytoch TGCT     | -0.0096359   |
| UCKL1 | Drug metabolism - other ( TGCT    | 0.483416832  |
| UCKL1 | E2f_targets TGCT                  | 0.234275498  |
| UCKL1 | Ecm_receptor_interaction TGCT     | -0.215159384 |
| UCKL1 | Effector cd4+ memory t ( TGCT     | -0.25702369  |
| UCKL1 | Effector cd8+ memory t ( TGCT     | -0.197650446 |
| UCKL1 | Effector memory t cell TGCT       | -0.260751283 |
| UCKL1 | Effector regulatory t (treg TGCT  | -0.386914384 |
| UCKL1 | Elvidge_hif1a_targets_up TGCT     | 0.139857276  |
| UCKL1 | Endothelial cell TGCT             | -0.225366077 |
| UCKL1 | Eosinophil TGCT                   | -0.18860342  |
| UCKL1 | Ether lipid metabolism TGCT       | -0.201375961 |
| UCKL1 | Exhausted cd4+ t cell TGCT        | -0.380745589 |
| UCKL1 | Exhausted cd8+ t cell TGCT        | -0.249838135 |
| UCKL1 | Exhausted t cell TGCT             | -0.115532691 |
| UCKL1 | Fat cell (adipocyte) TGCT         | 0.106457386  |
| UCKL1 | Fatty acid biosynthesis TGCT      | 0.171673285  |
| UCKL1 | Fatty acid degradation TGCT       | -0.078898859 |
| UCKL1 | Fatty acid elongation TGCT        | 0.152692418  |
| UCKL1 | Fibroblast TGCT                   | -0.3224211   |
| UCKL1 | Folate biosynthesis TGCT          | 0.256176005  |
| UCKL1 | Follicular b cell TGCT            | -0.22897246  |
| UCKL1 | Follicular dendritic cell TGCT    | -0.161935057 |
| UCKL1 | Follicular helper (tfh) t ce TGCT | -0.239120397 |
| UCKL1 | Follicular t cell TGCT            | -0.017618154 |
| UCKL1 | Foxp3+il-17+ t cell TGCT          | -0.109986721 |
| UCKL1 | Fructose and mannose me TGCT      | 0.349412633  |
| UCKL1 | G2m_checkpoint TGCT               | 0.119734317  |
| UCKL1 | Galactose metabolism TGCT         | 0.385876501  |
| UCKL1 | Galie_tumor_stemness_ge TGCT      | -0.209414486 |
| UCKL1 | Glutathione metabolism TGCT       | 0.453953727  |
| UCKL1 | Glycerolipid metabolism TGCT      | -0.138396392 |
| UCKL1 | Glycerophospholipid metæ TGCT     | 0.172558225  |
| UCKL1 | Glycine, serine and threor TGCT   | 0.43685323   |
| UCKL1 | Glycolysis / gluconeogene TGCT    | 0.407650661  |
| UCKL1 | Glycosaminoglycan biosy TGCT      | 0.097339506  |
| UCKL1 | Glycosaminoglycan biosy TGCT      | -0.059107638 |
| UCKL1 | Glycosaminoglycan biosy TGCT      | -0.142219433 |
| UCKL1 | Glycosaminoglycan degra TGCT      | -0.251383431 |
| UCKL1 | Glycosphingolipid biosyn TGCT     | -0.420335038 |
| UCKL1 | Glycosphingolipid biosyn TGCT     | -0.093603012 |
| UCKL1 | Glycosphingolipid biosyn TGCT     | 0.049812679  |

|       |                                |              |
|-------|--------------------------------|--------------|
| UCKL1 | Glycosylphosphatidylinos: TGCT | 0.168787615  |
| UCKL1 | Glyoxylate and dicarboxy TGCT  | 0.456314247  |
| UCKL1 | Granulocyte TGCT               | -0.267998867 |
| UCKL1 | Hedgehog_signaling TGCT        | -0.232904987 |
| UCKL1 | Histidine metabolism TGCT      | -0.130198415 |
| UCKL1 | Hypoxia TGCT                   | 0.209314474  |
| UCKL1 | Il-17ralpha t cell TGCT        | -0.20594142  |
| UCKL1 | Il2_stat5_signaling TGCT       | -0.123986492 |
| UCKL1 | Il6_jak_stat3_signaling TGCT   | -0.290875605 |
| UCKL1 | Immune_checkpoints_tun TGCT    | -0.192211604 |
| UCKL1 | Immune_inhibition_cytok TGCT   | -0.07095521  |
| UCKL1 | Inositol phosphate metabo TGCT | -0.472562519 |
| UCKL1 | Interleukin_6_signaling TGCT   | -0.487056358 |
| UCKL1 | Jaeger_metastasis_up TGCT      | 0.309037923  |
| UCKL1 | Jain_nfkb_signaling TGCT       | 0.413791919  |
| UCKL1 | Kras_signaling_up TGCT         | -0.366111417 |
| UCKL1 | Linoleic acid metabolism TGCT  | -0.10334391  |
| UCKL1 | Lipoic acid metabolism TGCT    | 0.144553413  |
| UCKL1 | Lysine degradation TGCT        | 0.011626658  |
| UCKL1 | Lysosome TGCT                  | -0.206699251 |
| UCKL1 | M1 macrophage TGCT             | -0.200939188 |
| UCKL1 | M2 macrophage TGCT             | -0.16762573  |
| UCKL1 | Mannose type o-glycan bi TGCT  | -0.19955649  |
| UCKL1 | Mapk_signaling_pathway TGCT    | -0.15538143  |
| UCKL1 | Mapk3_erk1_activation TGCT     | -0.44816655  |
| UCKL1 | Marginal zone b cell TGCT      | -0.316690489 |
| UCKL1 | Memory b cell TGCT             | -0.131886252 |
| UCKL1 | Mesenchymal cell TGCT          | -0.160442016 |
| UCKL1 | Mesenchymal stem cell TGCT     | -0.353058469 |
| UCKL1 | Metabolism of xenobiotic: TGCT | 0.102810222  |
| UCKL1 | Migrating cancer stem cel TGCT | 0.34043689   |
| UCKL1 | Mitotic_spindle TGCT           | -0.359677161 |
| UCKL1 | Monocyte TGCT                  | -0.145708011 |
| UCKL1 | Mtor_signaling_pathway TGCT    | -0.322119176 |
| UCKL1 | Mtorc1_signaling TGCT          | 0.406832024  |
| UCKL1 | Mucin type o-glycan biosy TGCT | -0.372316432 |
| UCKL1 | Myc_targets_v1 TGCT            | 0.443980516  |
| UCKL1 | Myeloid cell TGCT              | -0.297853986 |
| UCKL1 | N-glycan biosynthesis TGCT     | 0.162488007  |
| UCKL1 | Naive b cell TGCT              | 0.073227206  |
| UCKL1 | Naive cd4+ t cell TGCT         | -0.439960988 |
| UCKL1 | Naive cd8+ t cell TGCT         | -0.404474888 |
| UCKL1 | Natural killer cell TGCT       | -0.236623029 |

|       |                             |      |              |
|-------|-----------------------------|------|--------------|
| UCKL1 | Natural killer t (nkt) cell | TGCT | 0.047353747  |
| UCKL1 | Natural regulatory t (treg) | TGCT | -0.323783186 |
| UCKL1 | Neomycin, kanamycin and     | TGCT | 0.190163747  |
| UCKL1 | Neutrophil                  | TGCT | -0.126223546 |
| UCKL1 | Nicotinate and nicotinami   | TGCT | 0.132677696  |
| UCKL1 | Nitrogen metabolism         | TGCT | -0.043427019 |
| UCKL1 | Nod_like_receptor_signal    | TGCT | -0.216466065 |
| UCKL1 | Notch_signaling             | TGCT | 0.026121639  |
| UCKL1 | One carbon pool by folate   | TGCT | 0.268576056  |
| UCKL1 | Other glycan degradation    | TGCT | -0.107617855 |
| UCKL1 | Other types of o-glycan b   | TGCT | -0.152908754 |
| UCKL1 | Oxidative phosphorylatio    | TGCT | 0.56771349   |
| UCKL1 | P53_pathway                 | TGCT | 0.344880543  |
| UCKL1 | P53_signaling_pathway       | TGCT | 0.237770121  |
| UCKL1 | Pantothenate and coa bios   | TGCT | -0.000611079 |
| UCKL1 | Pentose and glucuronate i   | TGCT | 0.089759446  |
| UCKL1 | Pentose phosphate pathwa    | TGCT | 0.47248974   |
| UCKL1 | Pericyte                    | TGCT | -0.183756018 |
| UCKL1 | Phenylalanine metabolism    | TGCT | 0.191990751  |
| UCKL1 | Phenylalanine, tyrosine ar  | TGCT | 0.373327993  |
| UCKL1 | Phosphonate and phosphir    | TGCT | 0.297024844  |
| UCKL1 | Pi3k_akt_activation         | TGCT | -0.221705607 |
| UCKL1 | Pi3k_akt_mtor_signaling     | TGCT | 0.148939166  |
| UCKL1 | Porphyrin and chlorophyl    | TGCT | 0.207076998  |
| UCKL1 | Primary bile acid biosynt   | TGCT | -0.107968494 |
| UCKL1 | Propanoate metabolism       | TGCT | -0.013362569 |
| UCKL1 | Purine metabolism           | TGCT | 0.481380955  |
| UCKL1 | Pyrimidine metabolism       | TGCT | 0.437608079  |
| UCKL1 | Pyruvate metabolism         | TGCT | 0.484287076  |
| UCKL1 | Regulation_of_autophagy     | TGCT | 0.107947077  |
| UCKL1 | Retinol metabolism          | TGCT | -0.10242978  |
| UCKL1 | Riboflavin metabolism       | TGCT | 0.204859281  |
| UCKL1 | Schmahl_pdgf_signaling      | TGCT | -0.463524028 |
| UCKL1 | Selenocompound metabol      | TGCT | 0.16663954   |
| UCKL1 | Signaling_by_hippo          | TGCT | -0.091169002 |
| UCKL1 | Sphingolipid metabolism     | TGCT | -0.211042275 |
| UCKL1 | Starch and sucrose metabo   | TGCT | 0.336455225  |
| UCKL1 | Steroid biosynthesis        | TGCT | 0.050682359  |
| UCKL1 | Steroid hormone biosynth    | TGCT | 0.007410822  |
| UCKL1 | Sulfur metabolism           | TGCT | 0.075660851  |
| UCKL1 | Synthesis and degradation   | TGCT | 0.153998551  |
| UCKL1 | T helper cell               | TGCT | -0.281718595 |
| UCKL1 | T helper1 (th1) cell        | TGCT | -0.205659143 |

|       |                            |      |              |
|-------|----------------------------|------|--------------|
| UCKL1 | T helper17 (th17) cell     | TGCT | -0.260233296 |
| UCKL1 | T helper2 (th2) cell       | TGCT | -0.15293445  |
| UCKL1 | T helper9 (th9) cell       | TGCT | -0.211756736 |
| UCKL1 | Taurine and hypotaurine r  | TGCT | 0.058963051  |
| UCKL1 | Terpenoid backbone biosy   | TGCT | 0.280939479  |
| UCKL1 | Tgf_beta_signaling_pathw   | TGCT | -0.168306039 |
| UCKL1 | Thiamine metabolism        | TGCT | 0.368076745  |
| UCKL1 | Tnfa_signaling_via_nfkb    | TGCT | -0.111348979 |
| UCKL1 | Tryptophan metabolism      | TGCT | -0.024362468 |
| UCKL1 | Tumor endothelial cell     | TGCT | -0.15026137  |
| UCKL1 | Tyrosine metabolism        | TGCT | -0.10160748  |
| UCKL1 | Ubiquinone and other terf  | TGCT | 0.198479456  |
| UCKL1 | Valine, leucine and isoleu | TGCT | 0.308248528  |
| UCKL1 | Valine, leucine and isoleu | TGCT | 0.143109218  |
| UCKL1 | Vascular endothelial cell  | TGCT | -0.192126201 |
| UCKL1 | Vascular smooth muscle c   | TGCT | -0.174620361 |
| UCKL1 | Vegf_signaling_pathway     | TGCT | -0.29259829  |
| UCKL1 | Vitamin b6 metabolism      | TGCT | 0.29297641   |
| UCKL1 | Willert_wnt_signaling      | TGCT | 0.36042223   |
| UCKL1 | Wnt_beta_catenin_signali   | TGCT | 0.062299751  |
| UPP1  | Abnormal plasma cell       | TGCT | -0.712657526 |
| UPP1  | Activated b cell           | TGCT | 0.289524104  |
| UPP1  | Activated cd4+ t cell      | TGCT | 0.23694425   |
| UPP1  | Activated t cell           | TGCT | 0.220594819  |
| UPP1  | Alanine, aspartate and glu | TGCT | 0.447260576  |
| UPP1  | Alcala_apoptosis           | TGCT | 0.571121932  |
| UPP1  | Alpha-linolenic acid meta  | TGCT | -0.212366739 |
| UPP1  | Amino sugar and nucleoti   | TGCT | 0.558757165  |
| UPP1  | Ampk_pathway               | TGCT | -0.083072778 |
| UPP1  | Angiogenesis               | TGCT | -0.470576216 |
| UPP1  | Arachidonic acid metabol:  | TGCT | -0.098337676 |
| UPP1  | Arginine and proline metæ  | TGCT | 0.353736892  |
| UPP1  | Arginine biosynthesis      | TGCT | 0.132033126  |
| UPP1  | Ascorbate and aldarate mε  | TGCT | -0.460571715 |
| UPP1  | Atypical memory b cell     | TGCT | 0.063248703  |
| UPP1  | Axl+siglec6+ dendritic ce  | TGCT | -0.062965527 |
| UPP1  | B cell                     | TGCT | 0.146453052  |
| UPP1  | B1 cell                    | TGCT | 0.258497064  |
| UPP1  | Basal cell                 | TGCT | -0.337885121 |
| UPP1  | Beta-alanine metabolism    | TGCT | -0.27011314  |
| UPP1  | Biosynthesis of unsaturate | TGCT | -0.08624825  |
| UPP1  | Biotin metabolism          | TGCT | -0.304530619 |
| UPP1  | Butanoate metabolism       | TGCT | -0.212429197 |

|      |                             |      |              |
|------|-----------------------------|------|--------------|
| UPP1 | Caffeine metabolism         | TGCT | -0.318098044 |
| UPP1 | Cancer stem cell            | TGCT | -0.370966179 |
| UPP1 | Cancer stem-like cell       | TGCT | -0.436511725 |
| UPP1 | Cd4+ cytotoxic t cell       | TGCT | 0.163025168  |
| UPP1 | Cd4+ memory t cell          | TGCT | 0.284372513  |
| UPP1 | Cd4+ regulatory t cell      | TGCT | 0.219666308  |
| UPP1 | Cd4+ t helper cell          | TGCT | 0.223270293  |
| UPP1 | Cd4+cd25+ regulatory t c    | TGCT | 0.239286267  |
| UPP1 | Cd8+ cytotoxic t cell       | TGCT | 0.337506249  |
| UPP1 | Cd8+ regulatory t cell      | TGCT | 0.271139598  |
| UPP1 | Cell_cycle                  | TGCT | 0.50810934   |
| UPP1 | Chandran_metastasis_top5    | TGCT | 0.494802074  |
| UPP1 | Citrate cycle (tca cycle)   | TGCT | 0.578693655  |
| UPP1 | Cysteine and methionine r   | TGCT | 0.652862883  |
| UPP1 | Cytokine induced killer α   | TGCT | -0.116381153 |
| UPP1 | D-arginine and d-ornithin   | TGCT | -0.176320541 |
| UPP1 | D-glutamine and d-glutan    | TGCT | 0.565264546  |
| UPP1 | Dendritic cell              | TGCT | 0.090851663  |
| UPP1 | Dna_repair                  | TGCT | 0.735034741  |
| UPP1 | Dna_replication             | TGCT | 0.647595871  |
| UPP1 | Double-negative memory      | TGCT | 0.286627661  |
| UPP1 | Drug metabolism - cytoch    | TGCT | -0.486395631 |
| UPP1 | Drug metabolism - other (   | TGCT | 0.141810966  |
| UPP1 | E2f_targets                 | TGCT | 0.539699758  |
| UPP1 | Ecm_receptor_interaction    | TGCT | -0.649137074 |
| UPP1 | Effector cd4+ memory t (    | TGCT | 0.297407012  |
| UPP1 | Effector cd8+ memory t (    | TGCT | 0.259496245  |
| UPP1 | Effector memory t cell      | TGCT | 0.16496147   |
| UPP1 | Effector regulatory t (treg | TGCT | -0.030582739 |
| UPP1 | Elvidge_hif1a_targets_up    | TGCT | 0.761627471  |
| UPP1 | Endothelial cell            | TGCT | -0.512611888 |
| UPP1 | Eosinophil                  | TGCT | 0.294173637  |
| UPP1 | Ether lipid metabolism      | TGCT | -0.243588781 |
| UPP1 | Exhausted cd4+ t cell       | TGCT | -0.025196847 |
| UPP1 | Exhausted cd8+ t cell       | TGCT | 0.132266896  |
| UPP1 | Exhausted t cell            | TGCT | 0.301748339  |
| UPP1 | Fat cell (adipocyte)        | TGCT | -0.065438074 |
| UPP1 | Fatty acid biosynthesis     | TGCT | 0.698275055  |
| UPP1 | Fatty acid degradation      | TGCT | -0.21699131  |
| UPP1 | Fatty acid elongation       | TGCT | 0.389234858  |
| UPP1 | Fibroblast                  | TGCT | -0.494058032 |
| UPP1 | Folate biosynthesis         | TGCT | 0.350680102  |
| UPP1 | Follicular b cell           | TGCT | 0.204668008  |

|      |                              |      |              |
|------|------------------------------|------|--------------|
| UPP1 | Follicular dendritic cell    | TGCT | 0.29297456   |
| UPP1 | Follicular helper (tfh) t ce | TGCT | 0.2130177    |
| UPP1 | Follicular t cell            | TGCT | 0.345129414  |
| UPP1 | Foxp3+il-17+ t cell          | TGCT | 0.379098825  |
| UPP1 | Fructose and mannose me      | TGCT | 0.4677191    |
| UPP1 | G2m_checkpoint               | TGCT | 0.377941632  |
| UPP1 | Galactose metabolism         | TGCT | 0.440647465  |
| UPP1 | Galie_tumor_stemness_ge      | TGCT | -0.611409816 |
| UPP1 | Glutathione metabolism       | TGCT | 0.353567886  |
| UPP1 | Glycerolipid metabolism      | TGCT | -0.408322659 |
| UPP1 | Glycerophospholipid metæ     | TGCT | -0.11145834  |
| UPP1 | Glycine, serine and threor   | TGCT | 0.425319676  |
| UPP1 | Glycolysis / gluconeogene    | TGCT | 0.49188423   |
| UPP1 | Glycosaminoglycan biosy      | TGCT | -0.314908797 |
| UPP1 | Glycosaminoglycan biosy      | TGCT | -0.624173157 |
| UPP1 | Glycosaminoglycan biosy      | TGCT | -0.346430713 |
| UPP1 | Glycosaminoglycan degra      | TGCT | -0.494091669 |
| UPP1 | Glycosphingolipid biosyn     | TGCT | -0.322960449 |
| UPP1 | Glycosphingolipid biosyn     | TGCT | -0.047239629 |
| UPP1 | Glycosphingolipid biosyn     | TGCT | -0.32384789  |
| UPP1 | Glycosylphosphatidylinos     | TGCT | -0.393475772 |
| UPP1 | Glyoxylate and dicarboxy     | TGCT | 0.385426924  |
| UPP1 | Granulocyte                  | TGCT | 0.106276608  |
| UPP1 | Hedgehog_signaling           | TGCT | -0.62198641  |
| UPP1 | Histidine metabolism         | TGCT | -0.52113951  |
| UPP1 | Hypoxia                      | TGCT | 0.044605125  |
| UPP1 | Il-17alpha t cell            | TGCT | 0.278837705  |
| UPP1 | Il2_stat5_signaling          | TGCT | 0.145857523  |
| UPP1 | Il6_jak_stat3_signaling      | TGCT | 0.033972537  |
| UPP1 | Immune_checkpoints_tur       | TGCT | 0.315032359  |
| UPP1 | Immune_inhibition_cytok      | TGCT | 0.149535519  |
| UPP1 | Inositol phosphate metabo    | TGCT | -0.327199942 |
| UPP1 | Interleukin_6_signaling      | TGCT | 0.028602329  |
| UPP1 | Jaeger_metastasis_up         | TGCT | 0.218997444  |
| UPP1 | Jain_nfkb_signaling          | TGCT | 0.686558062  |
| UPP1 | Kras_signaling_up            | TGCT | -0.242880106 |
| UPP1 | Linoleic acid metabolism     | TGCT | -0.292238094 |
| UPP1 | Lipoic acid metabolism       | TGCT | 0.543698897  |
| UPP1 | Lysine degradation           | TGCT | -0.203589446 |
| UPP1 | Lysosome                     | TGCT | 0.052966015  |
| UPP1 | M1 macrophage                | TGCT | 0.255700946  |
| UPP1 | M2 macrophage                | TGCT | 0.037731613  |
| UPP1 | Mannose type o-glycan bi     | TGCT | -0.608341107 |

|      |                             |      |              |
|------|-----------------------------|------|--------------|
| UPP1 | Mapk_signaling_pathway      | TGCT | -0.1783201   |
| UPP1 | Mapk3_erk1_activation       | TGCT | 0.028241846  |
| UPP1 | Marginal zone b cell        | TGCT | 0.109315049  |
| UPP1 | Memory b cell               | TGCT | 0.32215793   |
| UPP1 | Mesenchymal cell            | TGCT | -0.451680052 |
| UPP1 | Mesenchymal stem cell       | TGCT | -0.098815819 |
| UPP1 | Metabolism of xenobiotic    | TGCT | -0.350905191 |
| UPP1 | Migrating cancer stem cel   | TGCT | 0.274828356  |
| UPP1 | Mitotic_spindle             | TGCT | -0.222874383 |
| UPP1 | Monocyte                    | TGCT | 0.192502873  |
| UPP1 | Mtor_signaling_pathway      | TGCT | -0.059065532 |
| UPP1 | Mtorc1_signaling            | TGCT | 0.780346483  |
| UPP1 | Mucin type o-glycan bios    | TGCT | -0.602626361 |
| UPP1 | Myc_targets_v1              | TGCT | 0.753756743  |
| UPP1 | Myeloid cell                | TGCT | 0.125364045  |
| UPP1 | N-glycan biosynthesis       | TGCT | 0.148316543  |
| UPP1 | Naive b cell                | TGCT | 0.27021677   |
| UPP1 | Naive cd4+ t cell           | TGCT | -0.11316963  |
| UPP1 | Naive cd8+ t cell           | TGCT | -0.163480937 |
| UPP1 | Natural killer cell         | TGCT | 0.188165701  |
| UPP1 | Natural killer t (nkt) cell | TGCT | 0.613936111  |
| UPP1 | Natural regulatory t (treg) | TGCT | 0.122206809  |
| UPP1 | Neomycin, kanamycin an      | TGCT | 0.536203406  |
| UPP1 | Neutrophil                  | TGCT | 0.222514465  |
| UPP1 | Nicotinate and nicotinami   | TGCT | 0.254525567  |
| UPP1 | Nitrogen metabolism         | TGCT | -0.265497742 |
| UPP1 | Nod_like_receptor_signal    | TGCT | 0.256425925  |
| UPP1 | Notch_signaling             | TGCT | -0.516197626 |
| UPP1 | One carbon pool by folate   | TGCT | 0.556980249  |
| UPP1 | Other glycan degradation    | TGCT | -0.224018134 |
| UPP1 | Other types of o-glycan b   | TGCT | -0.669036971 |
| UPP1 | Oxidative phosphorylatior   | TGCT | 0.716515526  |
| UPP1 | P53_pathway                 | TGCT | 0.434893692  |
| UPP1 | P53_signaling_pathway       | TGCT | 0.407637006  |
| UPP1 | Pantothenate and coa bios   | TGCT | 0.152941175  |
| UPP1 | Pentose and glucuronate in  | TGCT | -0.265020011 |
| UPP1 | Pentose phosphate pathwa    | TGCT | 0.649092102  |
| UPP1 | Pericyte                    | TGCT | -0.482596914 |
| UPP1 | Phenylalanine metabolism    | TGCT | 0.104072047  |
| UPP1 | Phenylalanine, tyrosine ar  | TGCT | 0.425119586  |
| UPP1 | Phosphonate and phosphiri   | TGCT | 0.284591825  |
| UPP1 | Pi3k_akt_activation         | TGCT | -0.675372698 |
| UPP1 | Pi3k_akt_mtor_signaling     | TGCT | 0.357031316  |

|      |                            |      |              |
|------|----------------------------|------|--------------|
| UPP1 | Porphyrin and chlorophyl   | TGCT | -0.0554226   |
| UPP1 | Primary bile acid biosynt  | TGCT | -0.385024246 |
| UPP1 | Propanoate metabolism      | TGCT | 0.031446824  |
| UPP1 | Purine metabolism          | TGCT | 0.52161158   |
| UPP1 | Pyrimidine metabolism      | TGCT | 0.746908744  |
| UPP1 | Pyruvate metabolism        | TGCT | 0.446296769  |
| UPP1 | Regulation_of_autophagy    | TGCT | 0.627626951  |
| UPP1 | Retinol metabolism         | TGCT | -0.61186951  |
| UPP1 | Riboflavin metabolism      | TGCT | 0.370094781  |
| UPP1 | Schmahl_pdgf_signaling     | TGCT | -0.371356843 |
| UPP1 | Selenocompound metabol     | TGCT | 0.732300454  |
| UPP1 | Signaling_by_hippo         | TGCT | -0.245531687 |
| UPP1 | Sphingolipid metabolism    | TGCT | -0.413379528 |
| UPP1 | Starch and sucrose metabo  | TGCT | 0.762171077  |
| UPP1 | Steroid biosynthesis       | TGCT | 0.217167462  |
| UPP1 | Steroid hormone biosynth   | TGCT | -0.430019519 |
| UPP1 | Sulfur metabolism          | TGCT | -0.356882773 |
| UPP1 | Synthesis and degradation  | TGCT | -0.293882115 |
| UPP1 | T helper cell              | TGCT | 0.157252851  |
| UPP1 | T helper1 (th1) cell       | TGCT | 0.193428779  |
| UPP1 | T helper17 (th17) cell     | TGCT | 0.135566805  |
| UPP1 | T helper2 (th2) cell       | TGCT | 0.172716719  |
| UPP1 | T helper9 (th9) cell       | TGCT | 0.102422686  |
| UPP1 | Taurine and hypotaurine r  | TGCT | -0.480471419 |
| UPP1 | Terpenoid backbone biosy   | TGCT | 0.468688733  |
| UPP1 | Tgf_beta_signaling_pathw   | TGCT | -0.555152873 |
| UPP1 | Thiamine metabolism        | TGCT | 0.359278768  |
| UPP1 | Tnfa_signaling_via_nfkb    | TGCT | 0.160144933  |
| UPP1 | Tryptophan metabolism      | TGCT | -0.171475649 |
| UPP1 | Tumor endothelial cell     | TGCT | -0.277378225 |
| UPP1 | Tyrosine metabolism        | TGCT | -0.380080785 |
| UPP1 | Ubiquinone and other terp  | TGCT | 0.276591006  |
| UPP1 | Valine, leucine and isoleu | TGCT | 0.054168162  |
| UPP1 | Valine, leucine and isoleu | TGCT | -0.132748945 |
| UPP1 | Vascular endothelial cell  | TGCT | -0.448826447 |
| UPP1 | Vascular smooth muscle c   | TGCT | -0.449298264 |
| UPP1 | Vegf_signaling_pathway     | TGCT | -0.418878156 |
| UPP1 | Vitamin b6 metabolism      | TGCT | 0.42267898   |
| UPP1 | Willert_wnt_signaling      | TGCT | 0.10715634   |
| UPP1 | Wnt_beta_catenin_signali   | TGCT | -0.267184844 |
| UPP2 | Abnormal plasma cell       | TGCT | 0.395182084  |
| UPP2 | Activated b cell           | TGCT | -0.223003752 |
| UPP2 | Activated cd4+ t cell      | TGCT | -0.200437768 |



|      |                            |      |              |
|------|----------------------------|------|--------------|
| UPP2 | Activated t cell           | TGCT | -0.2167459   |
| UPP2 | Alanine, aspartate and glu | TGCT | -0.144109271 |
| UPP2 | Alcala_apoptosis           | TGCT | -0.403000697 |
| UPP2 | Alpha-linolenic acid meta  | TGCT | -0.005933895 |
| UPP2 | Amino sugar and nucleoti   | TGCT | -0.322518316 |
| UPP2 | Ampk_pathway               | TGCT | 0.16587296   |
| UPP2 | Angiogenesis               | TGCT | 0.309143547  |
| UPP2 | Arachidonic acid metabol   | TGCT | 0.014631664  |
| UPP2 | Arginine and proline metæ  | TGCT | -0.121125343 |
| UPP2 | Arginine biosynthesis      | TGCT | 0.016192936  |
| UPP2 | Ascorbate and aldarate mε  | TGCT | 0.253400538  |
| UPP2 | Atypical memory b cell     | TGCT | -0.103686135 |
| UPP2 | Axl+siglec6+ dendritic ce  | TGCT | 0.070350983  |
| UPP2 | B cell                     | TGCT | -0.123928398 |
| UPP2 | B1 cell                    | TGCT | -0.200689156 |
| UPP2 | Basal cell                 | TGCT | 0.141784113  |
| UPP2 | Beta-alanine metabolism    | TGCT | 0.179006187  |
| UPP2 | Biosynthesis of unsaturate | TGCT | -0.052962526 |
| UPP2 | Biotin metabolism          | TGCT | 0.128429476  |
| UPP2 | Butanoate metabolism       | TGCT | 0.248487113  |
| UPP2 | Caffeine metabolism        | TGCT | 0.132731979  |
| UPP2 | Cancer stem cell           | TGCT | 0.296440237  |
| UPP2 | Cancer stem-like cell      | TGCT | 0.222657609  |
| UPP2 | Cd4+ cytotoxic t cell      | TGCT | -0.1506826   |
| UPP2 | Cd4+ memory t cell         | TGCT | -0.217775021 |
| UPP2 | Cd4+ regulatory t cell     | TGCT | -0.184776203 |
| UPP2 | Cd4+ t helper cell         | TGCT | -0.18569746  |
| UPP2 | Cd4+cd25+ regulatory t c   | TGCT | -0.196239252 |
| UPP2 | Cd8+ cytotoxic t cell      | TGCT | -0.257728301 |
| UPP2 | Cd8+ regulatory t cell     | TGCT | -0.256991733 |
| UPP2 | Cell_cycle                 | TGCT | -0.191329731 |
| UPP2 | Chandran_metastasis_top5   | TGCT | -0.182303772 |
| UPP2 | Citrate cycle (tca cycle)  | TGCT | -0.261308213 |
| UPP2 | Cysteine and methionine r  | TGCT | -0.272811754 |
| UPP2 | Cytokine induced killer cε | TGCT | 0.001968736  |
| UPP2 | D-arginine and d-ornithin  | TGCT | 0.17500116   |
| UPP2 | D-glutamine and d-glutan   | TGCT | -0.257040571 |
| UPP2 | Dendritic cell             | TGCT | -0.111484256 |
| UPP2 | Dna_repair                 | TGCT | -0.428511699 |
| UPP2 | Dna_replication            | TGCT | -0.374740639 |
| UPP2 | Double-negative memory     | TGCT | -0.228369716 |
| UPP2 | Drug metabolism - cytoch   | TGCT | 0.294372212  |
| UPP2 | Drug metabolism - other ε  | TGCT | -0.045878182 |

|      |                              |      |              |
|------|------------------------------|------|--------------|
| UPP2 | E2f_targets                  | TGCT | -0.260433254 |
| UPP2 | Ecm_receptor_interaction     | TGCT | 0.426156627  |
| UPP2 | Effector cd4+ memory t (     | TGCT | -0.206152157 |
| UPP2 | Effector cd8+ memory t (     | TGCT | -0.191825424 |
| UPP2 | Effector memory t cell       | TGCT | -0.156388987 |
| UPP2 | Effector regulatory t (treg  | TGCT | -0.057402338 |
| UPP2 | Elvidge_hif1a_targets_up     | TGCT | -0.424297369 |
| UPP2 | Endothelial cell             | TGCT | 0.350856316  |
| UPP2 | Eosinophil                   | TGCT | -0.253913277 |
| UPP2 | Ether lipid metabolism       | TGCT | 0.016110786  |
| UPP2 | Exhausted cd4+ t cell        | TGCT | -0.04350954  |
| UPP2 | Exhausted cd8+ t cell        | TGCT | -0.131593731 |
| UPP2 | Exhausted t cell             | TGCT | -0.259198202 |
| UPP2 | Fat cell (adipocyte)         | TGCT | 0.140112438  |
| UPP2 | Fatty acid biosynthesis      | TGCT | -0.346065233 |
| UPP2 | Fatty acid degradation       | TGCT | 0.036946132  |
| UPP2 | Fatty acid elongation        | TGCT | -0.332040565 |
| UPP2 | Fibroblast                   | TGCT | 0.371676743  |
| UPP2 | Folate biosynthesis          | TGCT | -0.152297922 |
| UPP2 | Follicular b cell            | TGCT | -0.17996339  |
| UPP2 | Follicular dendritic cell    | TGCT | -0.284250007 |
| UPP2 | Follicular helper (tfh) t ce | TGCT | -0.211523817 |
| UPP2 | Follicular t cell            | TGCT | -0.29406986  |
| UPP2 | Foxp3+il-17+ t cell          | TGCT | -0.288929946 |
| UPP2 | Fructose and mannose me      | TGCT | -0.247178926 |
| UPP2 | G2m_checkpoint               | TGCT | -0.152629547 |
| UPP2 | Galactose metabolism         | TGCT | -0.177558291 |
| UPP2 | Galie_tumor_stemness_ge      | TGCT | 0.406588657  |
| UPP2 | Glutathione metabolism       | TGCT | -0.127190579 |
| UPP2 | Glycerolipid metabolism      | TGCT | 0.209326588  |
| UPP2 | Glycerophospholipid metæ     | TGCT | -0.086856902 |
| UPP2 | Glycine, serine and threor   | TGCT | -0.096772742 |
| UPP2 | Glycolysis / gluconeogene    | TGCT | -0.183755836 |
| UPP2 | Glycosaminoglycan biosy      | TGCT | 0.237773778  |
| UPP2 | Glycosaminoglycan biosy      | TGCT | 0.415470209  |
| UPP2 | Glycosaminoglycan biosy      | TGCT | 0.159753262  |
| UPP2 | Glycosaminoglycan degra      | TGCT | 0.254720665  |
| UPP2 | Glycosphingolipid biosyn     | TGCT | 0.108795704  |
| UPP2 | Glycosphingolipid biosyn     | TGCT | 0.013440931  |
| UPP2 | Glycosphingolipid biosyn     | TGCT | 0.273304772  |
| UPP2 | Glycosylphosphatidylinos     | TGCT | 0.206541808  |
| UPP2 | Glyoxylate and dicarboxy     | TGCT | -0.172914064 |
| UPP2 | Granulocyte                  | TGCT | -0.140106927 |

|      |                             |      |              |
|------|-----------------------------|------|--------------|
| UPP2 | Hedgehog_signaling          | TGCT | 0.463478557  |
| UPP2 | Histidine metabolism        | TGCT | 0.28614364   |
| UPP2 | Hypoxia                     | TGCT | -0.048287211 |
| UPP2 | Il-17alpha t cell           | TGCT | -0.227485073 |
| UPP2 | Il2_stat5_signaling         | TGCT | -0.157545687 |
| UPP2 | Il6_jak_stat3_signaling     | TGCT | -0.114527444 |
| UPP2 | Immune_checkpoints_tun      | TGCT | -0.266723197 |
| UPP2 | Immune_inhibition_cytok     | TGCT | -0.121981859 |
| UPP2 | Inositol phosphate metabo   | TGCT | 0.066335169  |
| UPP2 | Interleukin_6_signaling     | TGCT | -0.120242077 |
| UPP2 | Jaeger_metastasis_up        | TGCT | -0.00628379  |
| UPP2 | Jain_nfkb_signaling         | TGCT | -0.431191278 |
| UPP2 | Kras_signaling_up           | TGCT | 0.105373572  |
| UPP2 | Linoleic acid metabolism    | TGCT | 0.08795201   |
| UPP2 | Lipoic acid metabolism      | TGCT | -0.318475317 |
| UPP2 | Lysine degradation          | TGCT | 0.136956812  |
| UPP2 | Lysosome                    | TGCT | -0.124113844 |
| UPP2 | M1 macrophage               | TGCT | -0.201384825 |
| UPP2 | M2 macrophage               | TGCT | -0.062387324 |
| UPP2 | Mannose type o-glycan bi    | TGCT | 0.329580597  |
| UPP2 | Mapk_signaling_pathway      | TGCT | 0.064560255  |
| UPP2 | Mapk3_erk1_activation       | TGCT | -0.172248346 |
| UPP2 | Marginal zone b cell        | TGCT | -0.099875101 |
| UPP2 | Memory b cell               | TGCT | -0.266295318 |
| UPP2 | Mesenchymal cell            | TGCT | 0.363305994  |
| UPP2 | Mesenchymal stem cell       | TGCT | 0.168997276  |
| UPP2 | Metabolism of xenobiotic    | TGCT | 0.228416133  |
| UPP2 | Migrating cancer stem cel   | TGCT | -0.050091078 |
| UPP2 | Mitotic_spindle             | TGCT | 0.109390918  |
| UPP2 | Monocyte                    | TGCT | -0.178577636 |
| UPP2 | Mtor_signaling_pathway      | TGCT | -0.068308057 |
| UPP2 | Mtorc1_signaling            | TGCT | -0.42383069  |
| UPP2 | Mucin type o-glycan biosy   | TGCT | 0.347633803  |
| UPP2 | Myc_targets_v1              | TGCT | -0.421719173 |
| UPP2 | Myeloid cell                | TGCT | -0.150713416 |
| UPP2 | N-glycan biosynthesis       | TGCT | -0.159247662 |
| UPP2 | Naive b cell                | TGCT | -0.1463742   |
| UPP2 | Naive cd4+ t cell           | TGCT | 0.050484754  |
| UPP2 | Naive cd8+ t cell           | TGCT | 0.092238591  |
| UPP2 | Natural killer cell         | TGCT | -0.204925577 |
| UPP2 | Natural killer t (nkt) cell | TGCT | -0.423141321 |
| UPP2 | Natural regulatory t (treg) | TGCT | -0.133888331 |
| UPP2 | Neomycin, kanamycin and     | TGCT | -0.260706741 |

|      |                            |      |              |
|------|----------------------------|------|--------------|
| UPP2 | Neutrophil                 | TGCT | -0.236612634 |
| UPP2 | Nicotinate and nicotinami  | TGCT | -0.117568627 |
| UPP2 | Nitrogen metabolism        | TGCT | 0.206672839  |
| UPP2 | Nod_like_receptor_signal   | TGCT | -0.281813979 |
| UPP2 | Notch_signaling            | TGCT | 0.337079037  |
| UPP2 | One carbon pool by folate  | TGCT | -0.268529097 |
| UPP2 | Other glycan degradation   | TGCT | 0.056971295  |
| UPP2 | Other types of o-glycan b  | TGCT | 0.428548541  |
| UPP2 | Oxidative phosphorylatior  | TGCT | -0.395881549 |
| UPP2 | P53_pathway                | TGCT | -0.329986464 |
| UPP2 | P53_signaling_pathway      | TGCT | -0.199631052 |
| UPP2 | Pantothenate and coa bios  | TGCT | -0.178459899 |
| UPP2 | Pentose and glucuronate in | TGCT | 0.089872814  |
| UPP2 | Pentose phosphate pathwa   | TGCT | -0.285716836 |
| UPP2 | Pericyte                   | TGCT | 0.373640415  |
| UPP2 | Phenylalanine metabolism   | TGCT | 0.043694133  |
| UPP2 | Phenylalanine, tyrosine ar | TGCT | -0.121430477 |
| UPP2 | Phosphonate and phosphir   | TGCT | -0.151443221 |
| UPP2 | Pi3k_akt_activation        | TGCT | 0.333859731  |
| UPP2 | Pi3k_akt_mtor_signaling    | TGCT | -0.369866344 |
| UPP2 | Porphyrin and chlorophyl   | TGCT | -0.007713336 |
| UPP2 | Primary bile acid biosyntf | TGCT | 0.292119698  |
| UPP2 | Propanoate metabolism      | TGCT | -0.010041075 |
| UPP2 | Purine metabolism          | TGCT | -0.179095498 |
| UPP2 | Pyrimidine metabolism      | TGCT | -0.365552038 |
| UPP2 | Pyruvate metabolism        | TGCT | -0.154718097 |
| UPP2 | Regulation_of_autophagy    | TGCT | -0.459037908 |
| UPP2 | Retinol metabolism         | TGCT | 0.315532633  |
| UPP2 | Riboflavin metabolism      | TGCT | -0.309010835 |
| UPP2 | Schmahl_pdgf_signaling     | TGCT | 0.044761701  |
| UPP2 | Selenocompound metabol     | TGCT | -0.428243636 |
| UPP2 | Signaling_by_hippo         | TGCT | 0.239092354  |
| UPP2 | Sphingolipid metabolism    | TGCT | 0.22051491   |
| UPP2 | Starch and sucrose metabo  | TGCT | -0.452255899 |
| UPP2 | Steroid biosynthesis       | TGCT | -0.166480337 |
| UPP2 | Steroid hormone biosynth   | TGCT | 0.322848006  |
| UPP2 | Sulfur metabolism          | TGCT | 0.11757755   |
| UPP2 | Synthesis and degradation  | TGCT | 0.211694906  |
| UPP2 | T helper cell              | TGCT | -0.144898765 |
| UPP2 | T helper1 (th1) cell       | TGCT | -0.208790089 |
| UPP2 | T helper17 (th17) cell     | TGCT | -0.155251844 |
| UPP2 | T helper2 (th2) cell       | TGCT | -0.169469024 |
| UPP2 | T helper9 (th9) cell       | TGCT | -0.15042626  |

|      |                            |      |              |
|------|----------------------------|------|--------------|
| UPP2 | Taurine and hypotaurine r  | TGCT | 0.313110136  |
| UPP2 | Terpenoid backbone biosy   | TGCT | -0.245832231 |
| UPP2 | Tgf_beta_signaling_pathw   | TGCT | 0.366259584  |
| UPP2 | Thiamine metabolism        | TGCT | -0.14783818  |
| UPP2 | Tnfa_signaling_via_nfkb    | TGCT | -0.218326328 |
| UPP2 | Tryptophan metabolism      | TGCT | 0.100434807  |
| UPP2 | Tumor endothelial cell     | TGCT | -0.047133423 |
| UPP2 | Tyrosine metabolism        | TGCT | 0.287201766  |
| UPP2 | Ubiquinone and other terp  | TGCT | -0.100635675 |
| UPP2 | Valine, leucine and isoleu | TGCT | 0.011230548  |
| UPP2 | Valine, leucine and isoleu | TGCT | 0.059006008  |
| UPP2 | Vascular endothelial cell  | TGCT | 0.326696876  |
| UPP2 | Vascular smooth muscle c   | TGCT | 0.351367016  |
| UPP2 | Vegf_signaling_pathway     | TGCT | 0.105177126  |
| UPP2 | Vitamin b6 metabolism      | TGCT | -0.036237618 |
| UPP2 | Willert_wnt_signaling      | TGCT | -0.06385617  |
| UPP2 | Wnt_beta_catenin_signali   | TGCT | 0.284552004  |
| CDA  | Abnormal plasma cell       | THCA | 0.004093837  |
| CDA  | Activated b cell           | THCA | 0.022908034  |
| CDA  | Activated cd4+ t cell      | THCA | 0.013294608  |
| CDA  | Activated t cell           | THCA | 0.046240837  |
| CDA  | Alanine, aspartate and glu | THCA | -0.279679429 |
| CDA  | Alcala_apoptosis           | THCA | -0.071164078 |
| CDA  | Alpha-linolenic acid meta  | THCA | 0.227546755  |
| CDA  | Amino sugar and nucleoti   | THCA | -0.067661481 |
| CDA  | Ampk_pathway               | THCA | -0.146718615 |
| CDA  | Angiogenesis               | THCA | 0.275298645  |
| CDA  | Arachidonic acid metabol   | THCA | 0.261318257  |
| CDA  | Arginine and proline metæ  | THCA | 0.074553152  |
| CDA  | Arginine biosynthesis      | THCA | -0.064635351 |
| CDA  | Ascorbate and aldarate mε  | THCA | -0.082109041 |
| CDA  | Atypical memory b cell     | THCA | 0.085826727  |
| CDA  | Axl+siglec6+ dendritic ce  | THCA | 0.102970768  |
| CDA  | B cell                     | THCA | -0.002387373 |
| CDA  | B1 cell                    | THCA | -0.031512201 |
| CDA  | Basal cell                 | THCA | 0.152322379  |
| CDA  | Beta-alanine metabolism    | THCA | -0.01372228  |
| CDA  | Biosynthesis of unsaturate | THCA | 0.118881589  |
| CDA  | Biotin metabolism          | THCA | -0.223690922 |
| CDA  | Butanoate metabolism       | THCA | -0.10082848  |
| CDA  | Caffeine metabolism        | THCA | 0.092415982  |
| CDA  | Cancer stem cell           | THCA | 0.159722657  |
| CDA  | Cancer stem-like cell      | THCA | 0.146828729  |

|     |                              |      |              |
|-----|------------------------------|------|--------------|
| CDA | Cd4+ cytotoxic t cell        | THCA | 0.107611724  |
| CDA | Cd4+ memory t cell           | THCA | 0.082145567  |
| CDA | Cd4+ regulatory t cell       | THCA | 0.088273237  |
| CDA | Cd4+ t helper cell           | THCA | 0.028324861  |
| CDA | Cd4+cd25+ regulatory t c     | THCA | 0.020943727  |
| CDA | Cd8+ cytotoxic t cell        | THCA | 0.031501185  |
| CDA | Cd8+ regulatory t cell       | THCA | -0.013127593 |
| CDA | Cell_cycle                   | THCA | -0.254174037 |
| CDA | Chandran_metastasis_top5     | THCA | -0.426290171 |
| CDA | Citrate cycle (tca cycle)    | THCA | -0.112986693 |
| CDA | Cysteine and methionine r    | THCA | -0.165915133 |
| CDA | Cytokine induced killer cε   | THCA | 0.004211093  |
| CDA | D-arginine and d-ornithin    | THCA | 0.091696664  |
| CDA | D-glutamine and d-glutan     | THCA | -0.34088813  |
| CDA | Dendritic cell               | THCA | 0.130932071  |
| CDA | Dna_repair                   | THCA | 0.095692643  |
| CDA | Dna_replication              | THCA | -0.196161721 |
| CDA | Double-negative memory       | THCA | 0.15237017   |
| CDA | Drug metabolism - cytoch     | THCA | 0.164872458  |
| CDA | Drug metabolism - other (    | THCA | 0.16759588   |
| CDA | E2f_targets                  | THCA | -0.32233973  |
| CDA | Ecm_receptor_interaction     | THCA | 0.141594329  |
| CDA | Effector cd4+ memory t (     | THCA | -0.032638037 |
| CDA | Effector cd8+ memory t (     | THCA | 0.063304469  |
| CDA | Effector memory t cell       | THCA | 0.059601184  |
| CDA | Effector regulatory t (treg  | THCA | 0.061594688  |
| CDA | Elvidge_hif1a_targets_up     | THCA | -0.163632966 |
| CDA | Endothelial cell             | THCA | 0.418078627  |
| CDA | Eosinophil                   | THCA | 0.071502902  |
| CDA | Ether lipid metabolism       | THCA | 0.120695634  |
| CDA | Exhausted cd4+ t cell        | THCA | 0.061757447  |
| CDA | Exhausted cd8+ t cell        | THCA | 0.057714822  |
| CDA | Exhausted t cell             | THCA | 0.033086113  |
| CDA | Fat cell (adipocyte)         | THCA | 0.113238729  |
| CDA | Fatty acid biosynthesis      | THCA | 0.003518268  |
| CDA | Fatty acid degradation       | THCA | -0.052119476 |
| CDA | Fatty acid elongation        | THCA | 0.052985234  |
| CDA | Fibroblast                   | THCA | 0.235085211  |
| CDA | Folate biosynthesis          | THCA | 0.150063999  |
| CDA | Follicular b cell            | THCA | 0.056805453  |
| CDA | Follicular dendritic cell    | THCA | -0.019117506 |
| CDA | Follicular helper (tfh) t ce | THCA | 0.009319846  |
| CDA | Follicular t cell            | THCA | 0.094502978  |

|     |                            |      |              |
|-----|----------------------------|------|--------------|
| CDA | Foxp3+il-17+ t cell        | THCA | 0.002708547  |
| CDA | Fructose and mannose me    | THCA | 0.077157992  |
| CDA | G2m_checkpoint             | THCA | -0.36789398  |
| CDA | Galactose metabolism       | THCA | 0.164869327  |
| CDA | Galie_tumor_stemness_ge    | THCA | 0.066858111  |
| CDA | Glutathione metabolism     | THCA | 0.126121147  |
| CDA | Glycerolipid metabolism    | THCA | 0.267881775  |
| CDA | Glycerophospholipid metæ   | THCA | 0.391556234  |
| CDA | Glycine, serine and threor | THCA | 0.041885807  |
| CDA | Glycolysis / gluconeogene  | THCA | 0.038412038  |
| CDA | Glycosaminoglycan biosy1   | THCA | 0.343795135  |
| CDA | Glycosaminoglycan biosy1   | THCA | 0.124487181  |
| CDA | Glycosaminoglycan biosy1   | THCA | 0.141674053  |
| CDA | Glycosaminoglycan degra    | THCA | -0.020226765 |
| CDA | Glycosphingolipid biosyn1  | THCA | 0.089188719  |
| CDA | Glycosphingolipid biosyn1  | THCA | -0.031709793 |
| CDA | Glycosphingolipid biosyn1  | THCA | -0.052203841 |
| CDA | Glycosylphosphatidylinos:  | THCA | -0.165481613 |
| CDA | Glyoxylate and dicarboxy   | THCA | -0.10932159  |
| CDA | Granulocyte                | THCA | 0.094650484  |
| CDA | Hedgehog_signaling         | THCA | 0.087563133  |
| CDA | Histidine metabolism       | THCA | 0.074858212  |
| CDA | Hypoxia                    | THCA | 0.177165739  |
| CDA | Il-17ralpha t cell         | THCA | -0.024916707 |
| CDA | Il2_stat5_signaling        | THCA | 0.087313164  |
| CDA | Il6_jak_stat3_signaling    | THCA | 0.041427147  |
| CDA | Immune_checkpoints_tunr    | THCA | -0.035420207 |
| CDA | Immune_inhibition_cytok    | THCA | 0.112769915  |
| CDA | Inositol phosphate metabo  | THCA | -0.228586349 |
| CDA | Interleukin_6_signaling    | THCA | -0.17188569  |
| CDA | Jaeger_metastasis_up       | THCA | -0.155152926 |
| CDA | Jain_nfkb_signaling        | THCA | -0.272519428 |
| CDA | Kras_signaling_up          | THCA | 0.069143077  |
| CDA | Linoleic acid metabolism   | THCA | 0.227857593  |
| CDA | Lipoic acid metabolism     | THCA | -0.067931223 |
| CDA | Lysine degradation         | THCA | -0.242651788 |
| CDA | Lysosome                   | THCA | -0.122570791 |
| CDA | M1 macrophage              | THCA | 0.04012838   |
| CDA | M2 macrophage              | THCA | 0.09890963   |
| CDA | Mannose type o-glycan bi   | THCA | 0.044848711  |
| CDA | Mapk_signaling_pathway     | THCA | 0.072860734  |
| CDA | Mapk3_erk1_activation      | THCA | -0.204191723 |
| CDA | Marginal zone b cell       | THCA | 0.019811003  |

|     |                             |      |              |
|-----|-----------------------------|------|--------------|
| CDA | Memory b cell               | THCA | 0.064433373  |
| CDA | Mesenchymal cell            | THCA | 0.355724032  |
| CDA | Mesenchymal stem cell       | THCA | 0.24540866   |
| CDA | Metabolism of xenobiotic    | THCA | 0.115176166  |
| CDA | Migrating cancer stem cel   | THCA | -0.257701795 |
| CDA | Mitotic_spindle             | THCA | -0.270882761 |
| CDA | Monocyte                    | THCA | 0.132081402  |
| CDA | Mtor_signaling_pathway      | THCA | -0.191590208 |
| CDA | Mtorc1_signaling            | THCA | -0.054703222 |
| CDA | Mucin type o-glycan biosy   | THCA | -0.129794128 |
| CDA | Myc_targets_v1              | THCA | -0.093255323 |
| CDA | Myeloid cell                | THCA | 0.064185788  |
| CDA | N-glycan biosynthesis       | THCA | -0.080459878 |
| CDA | Naive b cell                | THCA | 0.114224974  |
| CDA | Naive cd4+ t cell           | THCA | 0.121865454  |
| CDA | Naive cd8+ t cell           | THCA | 0.063631392  |
| CDA | Natural killer cell         | THCA | 0.023136728  |
| CDA | Natural killer t (nkt) cell | THCA | -0.008319567 |
| CDA | Natural regulatory t (treg) | THCA | 0.04587871   |
| CDA | Neomycin, kanamycin and     | THCA | 0.200741383  |
| CDA | Neutrophil                  | THCA | 0.094760892  |
| CDA | Nicotinate and nicotinami   | THCA | -0.046826344 |
| CDA | Nitrogen metabolism         | THCA | 0.151038927  |
| CDA | Nod_like_receptor_signal    | THCA | -0.04718442  |
| CDA | Notch_signaling             | THCA | 0.311248888  |
| CDA | One carbon pool by folate   | THCA | -0.265428377 |
| CDA | Other glycan degradation    | THCA | -0.247594676 |
| CDA | Other types of o-glycan b   | THCA | 0.214094515  |
| CDA | Oxidative phosphorylatio    | THCA | 0.204780089  |
| CDA | P53_pathway                 | THCA | 0.096105773  |
| CDA | P53_signaling_pathway       | THCA | -0.085751558 |
| CDA | Pantothenate and coa bios   | THCA | -0.052504816 |
| CDA | Pentose and glucuronate i   | THCA | -0.102785102 |
| CDA | Pentose phosphate pathwa    | THCA | -0.039943935 |
| CDA | Pericyte                    | THCA | 0.410332615  |
| CDA | Phenylalanine metabolism    | THCA | 0.192284608  |
| CDA | Phenylalanine, tyrosine ar  | THCA | -0.013088735 |
| CDA | Phosphonate and phosphir    | THCA | -0.125531148 |
| CDA | Pi3k_akt_activation         | THCA | -0.270128184 |
| CDA | Pi3k_akt_mtor_signaling     | THCA | -0.073181452 |
| CDA | Porphyrin and chlorophyl    | THCA | -0.005087386 |
| CDA | Primary bile acid biosynt   | THCA | 0.147261211  |
| CDA | Propanoate metabolism       | THCA | -0.212467562 |



|      |                            |      |              |
|------|----------------------------|------|--------------|
| CDA  | Purine metabolism          | THCA | 0.071225562  |
| CDA  | Pyrimidine metabolism      | THCA | -0.105730258 |
| CDA  | Pyruvate metabolism        | THCA | -0.000694288 |
| CDA  | Regulation_of_autophagy    | THCA | -0.041372801 |
| CDA  | Retinol metabolism         | THCA | 0.063056194  |
| CDA  | Riboflavin metabolism      | THCA | -0.055059724 |
| CDA  | Schmahl_pdgf_signaling     | THCA | 0.065403258  |
| CDA  | Selenocompound metabol     | THCA | -0.219440429 |
| CDA  | Signaling_by_hippo         | THCA | -0.397156847 |
| CDA  | Sphingolipid metabolism    | THCA | -0.436204554 |
| CDA  | Starch and sucrose metabo  | THCA | 0.058833351  |
| CDA  | Steroid biosynthesis       | THCA | 0.175284017  |
| CDA  | Steroid hormone biosynth   | THCA | 0.099608457  |
| CDA  | Sulfur metabolism          | THCA | -0.038111782 |
| CDA  | Synthesis and degradation  | THCA | 0.027998647  |
| CDA  | T helper cell              | THCA | 0.059870105  |
| CDA  | T helper1 (th1) cell       | THCA | 0.001677104  |
| CDA  | T helper17 (th17) cell     | THCA | 0.000586612  |
| CDA  | T helper2 (th2) cell       | THCA | 0.023476946  |
| CDA  | T helper9 (th9) cell       | THCA | 0.017989002  |
| CDA  | Taurine and hypotaurine r  | THCA | 0.158583389  |
| CDA  | Terpenoid backbone biosy   | THCA | 0.016926591  |
| CDA  | Tgf_beta_signaling_pathw   | THCA | -0.059532953 |
| CDA  | Thiamine metabolism        | THCA | 0.193378911  |
| CDA  | Tnfa_signaling_via_nfk     | THCA | 0.049007898  |
| CDA  | Tryptophan metabolism      | THCA | -0.024017355 |
| CDA  | Tumor endothelial cell     | THCA | 0.031178403  |
| CDA  | Tyrosine metabolism        | THCA | 0.181270226  |
| CDA  | Ubiquinone and other ter   | THCA | -0.052129379 |
| CDA  | Valine, leucine and isoleu | THCA | 0.117087174  |
| CDA  | Valine, leucine and isoleu | THCA | -0.142604437 |
| CDA  | Vascular endothelial cell  | THCA | 0.383158048  |
| CDA  | Vascular smooth muscle c   | THCA | 0.392292221  |
| CDA  | Vegf_signaling_pathway     | THCA | 0.258838647  |
| CDA  | Vitamin b6 metabolism      | THCA | -0.088227936 |
| CDA  | Willert_wnt_signaling      | THCA | 0.128178113  |
| CDA  | Wnt_beta_catenin_signali   | THCA | 0.286828914  |
| UCK1 | Abnormal plasma cell       | THCA | -0.102523402 |
| UCK1 | Activated b cell           | THCA | -0.249848239 |
| UCK1 | Activated cd4+ t cell      | THCA | -0.328317489 |
| UCK1 | Activated t cell           | THCA | -0.256033601 |
| UCK1 | Alanine, aspartate and glu | THCA | -0.053570953 |
| UCK1 | Alcala_apoptosis           | THCA | -0.022202609 |

|      |                            |      |              |
|------|----------------------------|------|--------------|
| UCK1 | Alpha-linolenic acid meta  | THCA | 0.229600654  |
| UCK1 | Amino sugar and nucleoti   | THCA | 0.039353297  |
| UCK1 | Ampk_pathway               | THCA | 0.099667456  |
| UCK1 | Angiogenesis               | THCA | -0.394533786 |
| UCK1 | Arachidonic acid metabol   | THCA | 0.144914645  |
| UCK1 | Arginine and proline met   | THCA | 0.236199836  |
| UCK1 | Arginine biosynthesis      | THCA | 0.035509815  |
| UCK1 | Ascorbate and aldarate m   | THCA | 0.297104167  |
| UCK1 | Atypical memory b cell     | THCA | -0.143632228 |
| UCK1 | Axl+siglec6+ dendritic ce  | THCA | -0.43887325  |
| UCK1 | B cell                     | THCA | -0.320773887 |
| UCK1 | B1 cell                    | THCA | -0.23508484  |
| UCK1 | Basal cell                 | THCA | -0.229502469 |
| UCK1 | Beta-alanine metabolism    | THCA | 0.172763239  |
| UCK1 | Biosynthesis of unsaturate | THCA | 0.16806946   |
| UCK1 | Biotin metabolism          | THCA | 0.235064854  |
| UCK1 | Butanoate metabolism       | THCA | 0.284941483  |
| UCK1 | Caffeine metabolism        | THCA | -0.137133633 |
| UCK1 | Cancer stem cell           | THCA | -0.493233221 |
| UCK1 | Cancer stem-like cell      | THCA | -0.379488584 |
| UCK1 | Cd4+ cytotoxic t cell      | THCA | -0.216389413 |
| UCK1 | Cd4+ memory t cell         | THCA | -0.159925207 |
| UCK1 | Cd4+ regulatory t cell     | THCA | -0.354173397 |
| UCK1 | Cd4+ t helper cell         | THCA | -0.266298741 |
| UCK1 | Cd4+cd25+ regulatory t c   | THCA | -0.28971608  |
| UCK1 | Cd8+ cytotoxic t cell      | THCA | -0.147384197 |
| UCK1 | Cd8+ regulatory t cell     | THCA | -0.22120083  |
| UCK1 | Cell_cycle                 | THCA | -0.326450774 |
| UCK1 | Chandran_metastasis_top5   | THCA | -0.288400675 |
| UCK1 | Citrate cycle (tca cycle)  | THCA | 0.131189486  |
| UCK1 | Cysteine and methionine r  | THCA | 0.056807333  |
| UCK1 | Cytokine induced killer c  | THCA | -0.149593389 |
| UCK1 | D-arginine and d-ornithin  | THCA | 0.080791763  |
| UCK1 | D-glutamine and d-glutan   | THCA | -0.48618819  |
| UCK1 | Dendritic cell             | THCA | -0.348677766 |
| UCK1 | Dna_repair                 | THCA | 0.521539287  |
| UCK1 | Dna_replication            | THCA | 0.246682999  |
| UCK1 | Double-negative memory     | THCA | 0.07216946   |
| UCK1 | Drug metabolism - cytoch   | THCA | 0.431421127  |
| UCK1 | Drug metabolism - other    | THCA | 0.48359537   |
| UCK1 | E2f_targets                | THCA | -0.027122896 |
| UCK1 | Ecm_receptor_interaction   | THCA | -0.446743294 |
| UCK1 | Effector cd4+ memory t (   | THCA | -0.372078355 |

|      |                              |      |              |
|------|------------------------------|------|--------------|
| UCK1 | Effector cd8+ memory t (     | THCA | -0.33653334  |
| UCK1 | Effector memory t cell       | THCA | -0.253099269 |
| UCK1 | Effector regulatory t (treg  | THCA | -0.385726982 |
| UCK1 | Elvidge_hif1a_targets_up     | THCA | -0.323258336 |
| UCK1 | Endothelial cell             | THCA | -0.277515285 |
| UCK1 | Eosinophil                   | THCA | -0.311165164 |
| UCK1 | Ether lipid metabolism       | THCA | -0.151496192 |
| UCK1 | Exhausted cd4+ t cell        | THCA | -0.422389157 |
| UCK1 | Exhausted cd8+ t cell        | THCA | -0.377068207 |
| UCK1 | Exhausted t cell             | THCA | -0.18356254  |
| UCK1 | Fat cell (adipocyte)         | THCA | 0.059066608  |
| UCK1 | Fatty acid biosynthesis      | THCA | 0.031099571  |
| UCK1 | Fatty acid degradation       | THCA | 0.229706176  |
| UCK1 | Fatty acid elongation        | THCA | 0.259965887  |
| UCK1 | Fibroblast                   | THCA | -0.372868225 |
| UCK1 | Folate biosynthesis          | THCA | 0.405050885  |
| UCK1 | Follicular b cell            | THCA | -0.239502836 |
| UCK1 | Follicular dendritic cell    | THCA | -0.291149264 |
| UCK1 | Follicular helper (tfh) t ce | THCA | -0.318656181 |
| UCK1 | Follicular t cell            | THCA | 0.082253238  |
| UCK1 | Foxp3+il-17+ t cell          | THCA | -0.311084444 |
| UCK1 | Fructose and mannose me      | THCA | 0.307030649  |
| UCK1 | G2m_checkpoint               | THCA | -0.3653437   |
| UCK1 | Galactose metabolism         | THCA | 0.076568925  |
| UCK1 | Galie_tumor_stemness_ge      | THCA | -0.39739958  |
| UCK1 | Glutathione metabolism       | THCA | 0.23715394   |
| UCK1 | Glycerolipid metabolism      | THCA | 0.247701028  |
| UCK1 | Glycerophospholipid metæ     | THCA | 0.241655033  |
| UCK1 | Glycine, serine and threor   | THCA | 0.374484797  |
| UCK1 | Glycolysis / gluconeogene    | THCA | 0.172134744  |
| UCK1 | Glycosaminoglycan biosy      | THCA | -0.104114365 |
| UCK1 | Glycosaminoglycan biosy      | THCA | -0.174757778 |
| UCK1 | Glycosaminoglycan biosy      | THCA | -0.214861705 |
| UCK1 | Glycosaminoglycan degra      | THCA | -0.154245542 |
| UCK1 | Glycosphingolipid biosyn     | THCA | -0.16356246  |
| UCK1 | Glycosphingolipid biosyn     | THCA | -0.230347554 |
| UCK1 | Glycosphingolipid biosyn     | THCA | -0.333127246 |
| UCK1 | Glycosylphosphatidylinos     | THCA | 0.221713094  |
| UCK1 | Glyoxylate and dicarboxy     | THCA | 0.290657672  |
| UCK1 | Granulocyte                  | THCA | -0.305704239 |
| UCK1 | Hedgehog_signaling           | THCA | -0.461313286 |
| UCK1 | Histidine metabolism         | THCA | 0.16408357   |
| UCK1 | Hypoxia                      | THCA | -0.369215188 |

|      |                             |      |              |
|------|-----------------------------|------|--------------|
| UCK1 | Il-17alpha t cell           | THCA | -0.264345048 |
| UCK1 | Il2_stat5_signaling         | THCA | -0.428990244 |
| UCK1 | Il6_jak_stat3_signaling     | THCA | -0.461604675 |
| UCK1 | Immune_checkpoints_tur      | THCA | -0.380623361 |
| UCK1 | Immune_inhibition_cytok     | THCA | -0.266668231 |
| UCK1 | Inositol phosphate metabo   | THCA | -0.510701647 |
| UCK1 | Interleukin_6_signaling     | THCA | -0.673176926 |
| UCK1 | Jaeger_metastasis_up        | THCA | -0.46608522  |
| UCK1 | Jain_nfkb_signaling         | THCA | 0.11052456   |
| UCK1 | Kras_signaling_up           | THCA | -0.507562236 |
| UCK1 | Linoleic acid metabolism    | THCA | 0.279272819  |
| UCK1 | Lipoic acid metabolism      | THCA | 0.446056935  |
| UCK1 | Lysine degradation          | THCA | 0.136314782  |
| UCK1 | Lysosome                    | THCA | -0.188095729 |
| UCK1 | M1 macrophage               | THCA | -0.392984667 |
| UCK1 | M2 macrophage               | THCA | -0.370874843 |
| UCK1 | Mannose type o-glycan bi    | THCA | 0.016107846  |
| UCK1 | Mapk_signaling_pathway      | THCA | -0.550642191 |
| UCK1 | Mapk3_erk1_activation       | THCA | -0.637288012 |
| UCK1 | Marginal zone b cell        | THCA | -0.267340694 |
| UCK1 | Memory b cell               | THCA | -0.170426676 |
| UCK1 | Mesenchymal cell            | THCA | -0.242983888 |
| UCK1 | Mesenchymal stem cell       | THCA | -0.456399472 |
| UCK1 | Metabolism of xenobiotic    | THCA | 0.419119638  |
| UCK1 | Migrating cancer stem cel   | THCA | -0.381501512 |
| UCK1 | Mitotic_spindle             | THCA | -0.610709466 |
| UCK1 | Monocyte                    | THCA | -0.317332913 |
| UCK1 | Mtor_signaling_pathway      | THCA | -0.357038479 |
| UCK1 | Mtorc1_signaling            | THCA | -0.116932652 |
| UCK1 | Mucin type o-glycan biosy   | THCA | -0.605953327 |
| UCK1 | Myc_targets_v1              | THCA | 0.25498173   |
| UCK1 | Myeloid cell                | THCA | -0.415382671 |
| UCK1 | N-glycan biosynthesis       | THCA | -0.014251107 |
| UCK1 | Naive b cell                | THCA | 0.016922707  |
| UCK1 | Naive cd4+ t cell           | THCA | -0.314627807 |
| UCK1 | Naive cd8+ t cell           | THCA | -0.186293496 |
| UCK1 | Natural killer cell         | THCA | -0.318232272 |
| UCK1 | Natural killer t (nkt) cell | THCA | -0.124264654 |
| UCK1 | Natural regulatory t (treg) | THCA | -0.330266795 |
| UCK1 | Neomycin, kanamycin and     | THCA | -0.167048247 |
| UCK1 | Neutrophil                  | THCA | -0.368157277 |
| UCK1 | Nicotinate and nicotinami   | THCA | -0.12903431  |
| UCK1 | Nitrogen metabolism         | THCA | 0.141007875  |

|      |                            |      |              |
|------|----------------------------|------|--------------|
| UCK1 | Nod_like_receptor_signal   | THCA | -0.504822601 |
| UCK1 | Notch_signaling            | THCA | -0.119929849 |
| UCK1 | One carbon pool by folate  | THCA | -0.008326997 |
| UCK1 | Other glycan degradation   | THCA | 0.059345821  |
| UCK1 | Other types of o-glycan b  | THCA | 0.225352751  |
| UCK1 | Oxidative phosphorylatio   | THCA | 0.52084119   |
| UCK1 | P53_pathway                | THCA | -0.244744291 |
| UCK1 | P53_signaling_pathway      | THCA | -0.444179533 |
| UCK1 | Pantothenate and coa bios  | THCA | 0.075700787  |
| UCK1 | Pentose and glucuronate i  | THCA | 0.256620373  |
| UCK1 | Pentose phosphate pathwa   | THCA | 0.190755698  |
| UCK1 | Pericyte                   | THCA | -0.20024381  |
| UCK1 | Phenylalanine metabolism   | THCA | 0.238433437  |
| UCK1 | Phenylalanine, tyrosine ar | THCA | 0.123639863  |
| UCK1 | Phosphonate and phosphir   | THCA | -0.048343657 |
| UCK1 | Pi3k_akt_activation        | THCA | -0.519330856 |
| UCK1 | Pi3k_akt_mtor_signaling    | THCA | -0.239487782 |
| UCK1 | Porphyrin and chlorophyl   | THCA | 0.374877257  |
| UCK1 | Primary bile acid biosynt  | THCA | 0.150662686  |
| UCK1 | Propanoate metabolism      | THCA | 0.108084829  |
| UCK1 | Purine metabolism          | THCA | 0.285505836  |
| UCK1 | Pyrimidine metabolism      | THCA | 0.339313492  |
| UCK1 | Pyruvate metabolism        | THCA | 0.231813336  |
| UCK1 | Regulation_of_autophagy    | THCA | -0.06034243  |
| UCK1 | Retinol metabolism         | THCA | 0.337688002  |
| UCK1 | Riboflavin metabolism      | THCA | 0.239916972  |
| UCK1 | Schmahl_pdgf_signaling     | THCA | -0.443835482 |
| UCK1 | Selenocompound metabol     | THCA | 0.003788541  |
| UCK1 | Signaling_by_hippo         | THCA | -0.534542564 |
| UCK1 | Sphingolipid metabolism    | THCA | -0.377356453 |
| UCK1 | Starch and sucrose metabo  | THCA | -0.053629742 |
| UCK1 | Steroid biosynthesis       | THCA | 0.302238982  |
| UCK1 | Steroid hormone biosynth   | THCA | 0.421844192  |
| UCK1 | Sulfur metabolism          | THCA | -0.20218198  |
| UCK1 | Synthesis and degradation  | THCA | 0.272210539  |
| UCK1 | T helper cell              | THCA | -0.338912113 |
| UCK1 | T helper1 (th1) cell       | THCA | -0.287889725 |
| UCK1 | T helper17 (th17) cell     | THCA | -0.358263213 |
| UCK1 | T helper2 (th2) cell       | THCA | -0.34705755  |
| UCK1 | T helper9 (th9) cell       | THCA | -0.199340258 |
| UCK1 | Taurine and hypotaurine r  | THCA | 0.301916085  |
| UCK1 | Terpenoid backbone biosy   | THCA | 0.141644895  |
| UCK1 | Tgf_beta_signaling_pathw   | THCA | -0.565338577 |

|      |                            |      |              |
|------|----------------------------|------|--------------|
| UCK1 | Thiamine metabolism        | THCA | 0.408032522  |
| UCK1 | Tnfa_signaling_via_nfk     | THCA | -0.491354428 |
| UCK1 | Tryptophan metabolism      | THCA | 0.193568029  |
| UCK1 | Tumor endothelial cell     | THCA | -0.164893257 |
| UCK1 | Tyrosine metabolism        | THCA | 0.33288987   |
| UCK1 | Ubiquinone and other ter   | THCA | 0.3190702    |
| UCK1 | Valine, leucine and isoleu | THCA | 0.147245903  |
| UCK1 | Valine, leucine and isoleu | THCA | 0.210217325  |
| UCK1 | Vascular endothelial cell  | THCA | -0.003604444 |
| UCK1 | Vascular smooth muscle c   | THCA | -0.047261691 |
| UCK1 | Vegf_signaling_pathway     | THCA | -0.262614714 |
| UCK1 | Vitamin b6 metabolism      | THCA | 0.303651728  |
| UCK1 | Willert_wnt_signaling      | THCA | -0.049230508 |
| UCK1 | Wnt_beta_catenin_signali   | THCA | -0.029713467 |
| UCK2 | Abnormal plasma cell       | THCA | 0.31524204   |
| UCK2 | Activated b cell           | THCA | 0.228309777  |
| UCK2 | Activated cd4+ t cell      | THCA | 0.21401412   |
| UCK2 | Activated t cell           | THCA | 0.221341463  |
| UCK2 | Alanine, aspartate and glu | THCA | 0.068386356  |
| UCK2 | Alcala_apoptosis           | THCA | 0.195547582  |
| UCK2 | Alpha-linolenic acid meta  | THCA | 0.055229662  |
| UCK2 | Amino sugar and nucleoti   | THCA | 0.178289633  |
| UCK2 | Ampk_pathway               | THCA | -0.024604468 |
| UCK2 | Angiogenesis               | THCA | 0.196030342  |
| UCK2 | Arachidonic acid metabol   | THCA | 0.128502955  |
| UCK2 | Arginine and proline met   | THCA | 0.142983207  |
| UCK2 | Arginine biosynthesis      | THCA | -0.016733512 |
| UCK2 | Ascorbate and aldarate m   | THCA | -0.049943648 |
| UCK2 | Atypical memory b cell     | THCA | 0.182981715  |
| UCK2 | Axl+siglec6+ dendritic ce  | THCA | 0.192709518  |
| UCK2 | B cell                     | THCA | 0.238449532  |
| UCK2 | B1 cell                    | THCA | 0.197490579  |
| UCK2 | Basal cell                 | THCA | 0.176382697  |
| UCK2 | Beta-alanine metabolism    | THCA | 0.036368473  |
| UCK2 | Biosynthesis of unsaturate | THCA | 0.115469195  |
| UCK2 | Biotin metabolism          | THCA | -0.146361453 |
| UCK2 | Butanoate metabolism       | THCA | -0.04465456  |
| UCK2 | Caffeine metabolism        | THCA | 0.134141471  |
| UCK2 | Cancer stem cell           | THCA | 0.222890732  |
| UCK2 | Cancer stem-like cell      | THCA | 0.368667642  |
| UCK2 | Cd4+ cytotoxic t cell      | THCA | 0.253222652  |
| UCK2 | Cd4+ memory t cell         | THCA | 0.211758378  |
| UCK2 | Cd4+ regulatory t cell     | THCA | 0.225657244  |

|      |                              |      |              |
|------|------------------------------|------|--------------|
| UCK2 | Cd4+ t helper cell           | THCA | 0.175237783  |
| UCK2 | Cd4+cd25+ regulatory t c     | THCA | 0.18096588   |
| UCK2 | Cd8+ cytotoxic t cell        | THCA | 0.210204718  |
| UCK2 | Cd8+ regulatory t cell       | THCA | 0.16142359   |
| UCK2 | Cell_cycle                   | THCA | 0.114398205  |
| UCK2 | Chandran_metastasis_top5     | THCA | -0.110281041 |
| UCK2 | Citrate cycle (tca cycle)    | THCA | 0.104992872  |
| UCK2 | Cysteine and methionine r    | THCA | 0.128876189  |
| UCK2 | Cytokine induced killer c    | THCA | 0.254657179  |
| UCK2 | D-arginine and d-ornithin    | THCA | 0.079706285  |
| UCK2 | D-glutamine and d-glutan     | THCA | -0.034599304 |
| UCK2 | Dendritic cell               | THCA | 0.255547853  |
| UCK2 | Dna_repair                   | THCA | 0.008908075  |
| UCK2 | Dna_replication              | THCA | 0.029188351  |
| UCK2 | Double-negative memory       | THCA | 0.155439681  |
| UCK2 | Drug metabolism - cytoch     | THCA | 0.033008564  |
| UCK2 | Drug metabolism - other c    | THCA | 0.076029171  |
| UCK2 | E2f_targets                  | THCA | 0.099403461  |
| UCK2 | Ecm_receptor_interaction     | THCA | 0.153534575  |
| UCK2 | Effector cd4+ memory t (     | THCA | 0.20459446   |
| UCK2 | Effector cd8+ memory t (     | THCA | 0.26418492   |
| UCK2 | Effector memory t cell       | THCA | 0.189079589  |
| UCK2 | Effector regulatory t (treg  | THCA | 0.193950919  |
| UCK2 | Elvidge_hif1a_targets_up     | THCA | 0.224400737  |
| UCK2 | Endothelial cell             | THCA | 0.250088666  |
| UCK2 | Eosinophil                   | THCA | 0.212927309  |
| UCK2 | Ether lipid metabolism       | THCA | 0.093998182  |
| UCK2 | Exhausted cd4+ t cell        | THCA | 0.190883776  |
| UCK2 | Exhausted cd8+ t cell        | THCA | 0.189280116  |
| UCK2 | Exhausted t cell             | THCA | 0.175095402  |
| UCK2 | Fat cell (adipocyte)         | THCA | 0.160612404  |
| UCK2 | Fatty acid biosynthesis      | THCA | 0.128975007  |
| UCK2 | Fatty acid degradation       | THCA | 0.049062136  |
| UCK2 | Fatty acid elongation        | THCA | 0.010584087  |
| UCK2 | Fibroblast                   | THCA | 0.196394575  |
| UCK2 | Folate biosynthesis          | THCA | 0.177428531  |
| UCK2 | Follicular b cell            | THCA | 0.159047817  |
| UCK2 | Follicular dendritic cell    | THCA | 0.179729253  |
| UCK2 | Follicular helper (tfh) t ce | THCA | 0.215224359  |
| UCK2 | Follicular t cell            | THCA | 0.112210827  |
| UCK2 | Foxp3+il-17+ t cell          | THCA | 0.205308273  |
| UCK2 | Fructose and mannose me      | THCA | 0.130350119  |
| UCK2 | G2m_checkpoint               | THCA | 0.068726344  |

|      |                            |      |              |
|------|----------------------------|------|--------------|
| UCK2 | Galactose metabolism       | THCA | 0.199423952  |
| UCK2 | Galie_tumor_stemness_ge    | THCA | -0.025735341 |
| UCK2 | Glutathione metabolism     | THCA | 0.201501708  |
| UCK2 | Glycerolipid metabolism    | THCA | 0.068063822  |
| UCK2 | Glycerophospholipid metæ   | THCA | -0.034132185 |
| UCK2 | Glycine, serine and threor | THCA | 0.072302947  |
| UCK2 | Glycolysis / gluconeogene  | THCA | 0.176348265  |
| UCK2 | Glycosaminoglycan biosy    | THCA | 0.165783281  |
| UCK2 | Glycosaminoglycan biosy    | THCA | 0.042773252  |
| UCK2 | Glycosaminoglycan biosy    | THCA | 0.110344198  |
| UCK2 | Glycosaminoglycan degra    | THCA | 0.075662964  |
| UCK2 | Glycosphingolipid biosyn   | THCA | 0.094376863  |
| UCK2 | Glycosphingolipid biosyn   | THCA | 0.374358223  |
| UCK2 | Glycosphingolipid biosyn   | THCA | 0.319059762  |
| UCK2 | Glycosylphosphatidylinos   | THCA | -0.199066869 |
| UCK2 | Glyoxylate and dicarboxy   | THCA | -0.00059618  |
| UCK2 | Granulocyte                | THCA | 0.240086186  |
| UCK2 | Hedgehog_signaling         | THCA | 0.022427981  |
| UCK2 | Histidine metabolism       | THCA | 0.101570041  |
| UCK2 | Hypoxia                    | THCA | 0.308246192  |
| UCK2 | Il-17ralpha t cell         | THCA | 0.149845161  |
| UCK2 | Il2_stat5_signaling        | THCA | 0.203445629  |
| UCK2 | Il6_jak_stat3_signaling    | THCA | 0.218612865  |
| UCK2 | Immune_checkpoints_tur     | THCA | 0.046507807  |
| UCK2 | Immune_inhibition_cytok    | THCA | 0.284544309  |
| UCK2 | Inositol phosphate metabo  | THCA | -0.088941737 |
| UCK2 | Interleukin_6_signaling    | THCA | 0.079322625  |
| UCK2 | Jaeger_metastasis_up       | THCA | 0.276910292  |
| UCK2 | Jain_nfkb_signaling        | THCA | -0.064557416 |
| UCK2 | Kras_signaling_up          | THCA | 0.171426709  |
| UCK2 | Linoleic acid metabolism   | THCA | -0.048216528 |
| UCK2 | Lipoic acid metabolism     | THCA | -0.225121122 |
| UCK2 | Lysine degradation         | THCA | -0.053648225 |
| UCK2 | Lysosome                   | THCA | -0.006270678 |
| UCK2 | M1 macrophage              | THCA | 0.212385682  |
| UCK2 | M2 macrophage              | THCA | 0.261100595  |
| UCK2 | Mannose type o-glycan bi   | THCA | 0.032784637  |
| UCK2 | Mapk_signaling_pathway     | THCA | 0.211757257  |
| UCK2 | Mapk3_erk1_activation      | THCA | 0.117319782  |
| UCK2 | Marginal zone b cell       | THCA | 0.194346233  |
| UCK2 | Memory b cell              | THCA | 0.230993506  |
| UCK2 | Mesenchymal cell           | THCA | 0.230611555  |
| UCK2 | Mesenchymal stem cell      | THCA | 0.249629202  |



|      |                             |      |              |
|------|-----------------------------|------|--------------|
| UCK2 | Metabolism of xenobiotic    | THCA | 0.038248051  |
| UCK2 | Migrating cancer stem cel   | THCA | -0.054904576 |
| UCK2 | Mitotic_spindle             | THCA | -0.028844837 |
| UCK2 | Monocyte                    | THCA | 0.245716761  |
| UCK2 | Mtor_signaling_pathway      | THCA | -0.088853325 |
| UCK2 | Mtorc1_signaling            | THCA | 0.30060462   |
| UCK2 | Mucin type o-glycan bios    | THCA | -0.017300142 |
| UCK2 | Myc_targets_v1              | THCA | 0.086890124  |
| UCK2 | Myeloid cell                | THCA | 0.213028114  |
| UCK2 | N-glycan biosynthesis       | THCA | -0.128459242 |
| UCK2 | Naive b cell                | THCA | 0.16702857   |
| UCK2 | Naive cd4+ t cell           | THCA | 0.052009499  |
| UCK2 | Naive cd8+ t cell           | THCA | -0.085265236 |
| UCK2 | Natural killer cell         | THCA | 0.202573008  |
| UCK2 | Natural killer t (nkt) cell | THCA | 0.192055015  |
| UCK2 | Natural regulatory t (treg) | THCA | 0.07579941   |
| UCK2 | Neomycin, kanamycin an      | THCA | 0.116849461  |
| UCK2 | Neutrophil                  | THCA | 0.24451386   |
| UCK2 | Nicotinate and nicotinami   | THCA | 0.250697215  |
| UCK2 | Nitrogen metabolism         | THCA | -0.158674616 |
| UCK2 | Nod_like_receptor_signal    | THCA | 0.245809452  |
| UCK2 | Notch_signaling             | THCA | 0.051704128  |
| UCK2 | One carbon pool by folate   | THCA | 0.073567058  |
| UCK2 | Other glycan degradation    | THCA | -0.072275745 |
| UCK2 | Other types of o-glycan b   | THCA | 0.020023678  |
| UCK2 | Oxidative phosphorylatio    | THCA | 0.114071761  |
| UCK2 | P53_pathway                 | THCA | 0.18990936   |
| UCK2 | P53_signaling_pathway       | THCA | 0.284012566  |
| UCK2 | Pantothenate and coa bios   | THCA | 0.147622261  |
| UCK2 | Pentose and glucuronate i   | THCA | 0.024654683  |
| UCK2 | Pentose phosphate pathwa    | THCA | 0.0837361    |
| UCK2 | Pericyte                    | THCA | 0.25503136   |
| UCK2 | Phenylalanine metabolism    | THCA | 0.155699569  |
| UCK2 | Phenylalanine, tyrosine ar  | THCA | 0.230313334  |
| UCK2 | Phosphonate and phosphir    | THCA | -0.141904914 |
| UCK2 | Pi3k_akt_activation         | THCA | -0.00315843  |
| UCK2 | Pi3k_akt_mtor_signaling     | THCA | 0.222452645  |
| UCK2 | Porphyrin and chlorophyl    | THCA | 0.064494707  |
| UCK2 | Primary bile acid biosynt   | THCA | 0.119625034  |
| UCK2 | Propanoate metabolism       | THCA | -0.00989775  |
| UCK2 | Purine metabolism           | THCA | 0.098918479  |
| UCK2 | Pyrimidine metabolism       | THCA | -0.008302958 |
| UCK2 | Pyruvate metabolism         | THCA | 0.1383343    |

|       |                            |      |              |
|-------|----------------------------|------|--------------|
| UCK2  | Regulation_of_autophagy    | THCA | -0.054816261 |
| UCK2  | Retinol metabolism         | THCA | -0.073617867 |
| UCK2  | Riboflavin metabolism      | THCA | 0.144661955  |
| UCK2  | Schmahl_pdgf_signaling     | THCA | -0.000590166 |
| UCK2  | Selenocompound metabol     | THCA | 0.049937774  |
| UCK2  | Signaling_by_hippo         | THCA | -0.110957839 |
| UCK2  | Sphingolipid metabolism    | THCA | -0.198069501 |
| UCK2  | Starch and sucrose metabo  | THCA | 0.211012092  |
| UCK2  | Steroid biosynthesis       | THCA | -0.00763591  |
| UCK2  | Steroid hormone biosynth   | THCA | -0.030900266 |
| UCK2  | Sulfur metabolism          | THCA | 0.060514529  |
| UCK2  | Synthesis and degradation  | THCA | -0.028272226 |
| UCK2  | T helper cell              | THCA | 0.185585892  |
| UCK2  | T helper1 (th1) cell       | THCA | 0.137176378  |
| UCK2  | T helper17 (th17) cell     | THCA | 0.21918944   |
| UCK2  | T helper2 (th2) cell       | THCA | 0.202957882  |
| UCK2  | T helper9 (th9) cell       | THCA | 0.190141434  |
| UCK2  | Taurine and hypotaurine r  | THCA | -0.147140225 |
| UCK2  | Terpenoid backbone biosy   | THCA | 0.007783732  |
| UCK2  | Tgf_beta_signaling_pathw   | THCA | 0.028661342  |
| UCK2  | Thiamine metabolism        | THCA | -0.070212654 |
| UCK2  | Tnfa_signaling_via_nfkb    | THCA | 0.221117878  |
| UCK2  | Tryptophan metabolism      | THCA | 0.103933268  |
| UCK2  | Tumor endothelial cell     | THCA | 0.134584423  |
| UCK2  | Tyrosine metabolism        | THCA | 0.124223713  |
| UCK2  | Ubiquinone and other terp  | THCA | -0.071997931 |
| UCK2  | Valine, leucine and isoleu | THCA | 0.243277937  |
| UCK2  | Valine, leucine and isoleu | THCA | 0.010892177  |
| UCK2  | Vascular endothelial cell  | THCA | 0.014899833  |
| UCK2  | Vascular smooth muscle c   | THCA | 0.123698494  |
| UCK2  | Vegf_signaling_pathway     | THCA | 0.175946623  |
| UCK2  | Vitamin b6 metabolism      | THCA | 0.105636393  |
| UCK2  | Willert_wnt_signaling      | THCA | 0.297576721  |
| UCK2  | Wnt_beta_catenin_signali   | THCA | -0.083770713 |
| UCKL1 | Abnormal plasma cell       | THCA | -0.078739387 |
| UCKL1 | Activated b cell           | THCA | 0.003383065  |
| UCKL1 | Activated cd4+ t cell      | THCA | -0.096765327 |
| UCKL1 | Activated t cell           | THCA | -0.048913323 |
| UCKL1 | Alanine, aspartate and glu | THCA | -0.038865771 |
| UCKL1 | Alcala_apoptosis           | THCA | 0.122816696  |
| UCKL1 | Alpha-linolenic acid meta  | THCA | 0.207548793  |
| UCKL1 | Amino sugar and nucleoti   | THCA | 0.13876618   |
| UCKL1 | Ampk_pathway               | THCA | 0.096688374  |

|       |                             |      |              |
|-------|-----------------------------|------|--------------|
| UCKL1 | Angiogenesis                | THCA | -0.111978873 |
| UCKL1 | Arachidonic acid metabol    | THCA | 0.246496126  |
| UCKL1 | Arginine and proline met    | THCA | 0.002097826  |
| UCKL1 | Arginine biosynthesis       | THCA | 0.01220166   |
| UCKL1 | Ascorbate and aldarate m    | THCA | -0.058305429 |
| UCKL1 | Atypical memory b cell      | THCA | -0.048807249 |
| UCKL1 | Axl+siglec6+ dendritic ce   | THCA | -0.135443383 |
| UCKL1 | B cell                      | THCA | -0.109188167 |
| UCKL1 | B1 cell                     | THCA | -0.023043723 |
| UCKL1 | Basal cell                  | THCA | 0.095482742  |
| UCKL1 | Beta-alanine metabolism     | THCA | -0.113348417 |
| UCKL1 | Biosynthesis of unsaturate  | THCA | -0.042418553 |
| UCKL1 | Biotin metabolism           | THCA | -0.006382585 |
| UCKL1 | Butanoate metabolism        | THCA | -0.0096823   |
| UCKL1 | Caffeine metabolism         | THCA | -0.162810941 |
| UCKL1 | Cancer stem cell            | THCA | -0.251149319 |
| UCKL1 | Cancer stem-like cell       | THCA | -0.158739184 |
| UCKL1 | Cd4+ cytotoxic t cell       | THCA | -0.042057305 |
| UCKL1 | Cd4+ memory t cell          | THCA | -0.054477723 |
| UCKL1 | Cd4+ regulatory t cell      | THCA | -0.10245798  |
| UCKL1 | Cd4+ t helper cell          | THCA | -0.078436227 |
| UCKL1 | Cd4+cd25+ regulatory t c    | THCA | -0.081777818 |
| UCKL1 | Cd8+ cytotoxic t cell       | THCA | -0.017803215 |
| UCKL1 | Cd8+ regulatory t cell      | THCA | -0.078502679 |
| UCKL1 | Cell_cycle                  | THCA | -0.162768344 |
| UCKL1 | Chandran_metastasis_top     | THCA | -0.337353644 |
| UCKL1 | Citrate cycle (tca cycle)   | THCA | 0.025490696  |
| UCKL1 | Cysteine and methionine r   | THCA | 0.010008835  |
| UCKL1 | Cytokine induced killer c   | THCA | -0.043139822 |
| UCKL1 | D-arginine and d-ornithin   | THCA | 0.040160764  |
| UCKL1 | D-glutamine and d-glutan    | THCA | -0.179194338 |
| UCKL1 | Dendritic cell              | THCA | -0.072042111 |
| UCKL1 | Dna_repair                  | THCA | 0.459972593  |
| UCKL1 | Dna_replication             | THCA | 0.289622563  |
| UCKL1 | Double-negative memory      | THCA | 0.035753295  |
| UCKL1 | Drug metabolism - cytoch    | THCA | 0.179997209  |
| UCKL1 | Drug metabolism - other     | THCA | 0.345625261  |
| UCKL1 | E2f_targets                 | THCA | 0.065990215  |
| UCKL1 | Ecm_receptor_interaction    | THCA | -0.1493083   |
| UCKL1 | Effector cd4+ memory t (    | THCA | -0.116884372 |
| UCKL1 | Effector cd8+ memory t (    | THCA | -0.061552645 |
| UCKL1 | Effector memory t cell      | THCA | -0.1119321   |
| UCKL1 | Effector regulatory t (treg | THCA | -0.156619509 |

|       |                              |      |              |
|-------|------------------------------|------|--------------|
| UCKL1 | Elvidge_hif1a_targets_up     | THCA | -0.258649291 |
| UCKL1 | Endothelial cell             | THCA | -0.266792143 |
| UCKL1 | Eosinophil                   | THCA | -0.015531671 |
| UCKL1 | Ether lipid metabolism       | THCA | 0.031481658  |
| UCKL1 | Exhausted cd4+ t cell        | THCA | -0.18268908  |
| UCKL1 | Exhausted cd8+ t cell        | THCA | -0.122530406 |
| UCKL1 | Exhausted t cell             | THCA | -0.021740746 |
| UCKL1 | Fat cell (adipocyte)         | THCA | -0.042300598 |
| UCKL1 | Fatty acid biosynthesis      | THCA | -0.015239015 |
| UCKL1 | Fatty acid degradation       | THCA | -0.001628773 |
| UCKL1 | Fatty acid elongation        | THCA | 0.080878878  |
| UCKL1 | Fibroblast                   | THCA | -0.16645843  |
| UCKL1 | Folate biosynthesis          | THCA | 0.110709267  |
| UCKL1 | Follicular b cell            | THCA | -0.058358699 |
| UCKL1 | Follicular dendritic cell    | THCA | -0.031943851 |
| UCKL1 | Follicular helper (tfh) t ce | THCA | -0.060124963 |
| UCKL1 | Follicular t cell            | THCA | 0.0863438    |
| UCKL1 | Foxp3+il-17+ t cell          | THCA | -0.039689776 |
| UCKL1 | Fructose and mannose me      | THCA | 0.300231291  |
| UCKL1 | G2m_checkpoint               | THCA | -0.245747246 |
| UCKL1 | Galactose metabolism         | THCA | 0.174059489  |
| UCKL1 | Galie_tumor_stemness_ge      | THCA | -0.223988335 |
| UCKL1 | Glutathione metabolism       | THCA | 0.169789356  |
| UCKL1 | Glycerolipid metabolism      | THCA | 0.039105391  |
| UCKL1 | Glycerophospholipid metæ     | THCA | 0.226068662  |
| UCKL1 | Glycine, serine and threor   | THCA | 0.075031305  |
| UCKL1 | Glycolysis / gluconeogene    | THCA | 0.084756895  |
| UCKL1 | Glycosaminoglycan biosy      | THCA | -0.007693934 |
| UCKL1 | Glycosaminoglycan biosy      | THCA | -0.139539578 |
| UCKL1 | Glycosaminoglycan biosy      | THCA | -0.122676598 |
| UCKL1 | Glycosaminoglycan degra      | THCA | 0.029829465  |
| UCKL1 | Glycosphingolipid biosyn     | THCA | -0.037170938 |
| UCKL1 | Glycosphingolipid biosyn     | THCA | -0.030754765 |
| UCKL1 | Glycosphingolipid biosyn     | THCA | -0.046034779 |
| UCKL1 | Glycosylphosphatidylinos     | THCA | 0.006268712  |
| UCKL1 | Glyoxylate and dicarboxy     | THCA | 0.146302032  |
| UCKL1 | Granulocyte                  | THCA | -0.041443021 |
| UCKL1 | Hedgehog_signaling           | THCA | -0.42261926  |
| UCKL1 | Histidine metabolism         | THCA | -0.114847384 |
| UCKL1 | Hypoxia                      | THCA | -0.047085578 |
| UCKL1 | Il-17ralpha t cell           | THCA | -0.064086969 |
| UCKL1 | Il2_stat5_signaling          | THCA | -0.108395127 |
| UCKL1 | Il6_jak_stat3_signaling      | THCA | -0.107722671 |

|       |                             |      |              |
|-------|-----------------------------|------|--------------|
| UCKL1 | Immune_checkpoints_tur      | THCA | -0.03951169  |
| UCKL1 | Immune_inhibition_cytok     | THCA | 0.114672702  |
| UCKL1 | Inositol phosphate metabo   | THCA | -0.4586308   |
| UCKL1 | Interleukin_6_signaling     | THCA | -0.375810002 |
| UCKL1 | Jaeger_metastasis_up        | THCA | -0.240491395 |
| UCKL1 | Jain_nfkb_signaling         | THCA | -0.065717445 |
| UCKL1 | Kras_signaling_up           | THCA | -0.166588558 |
| UCKL1 | Linoleic acid metabolism    | THCA | 0.292053057  |
| UCKL1 | Lipoic acid metabolism      | THCA | 0.132234814  |
| UCKL1 | Lysine degradation          | THCA | -0.148550014 |
| UCKL1 | Lysosome                    | THCA | -0.014008435 |
| UCKL1 | M1 macrophage               | THCA | -0.103381178 |
| UCKL1 | M2 macrophage               | THCA | -0.044352272 |
| UCKL1 | Mannose type o-glycan bi    | THCA | -0.052870032 |
| UCKL1 | Mapk_signaling_pathway      | THCA | -0.283544329 |
| UCKL1 | Mapk3_erk1_activation       | THCA | -0.384972383 |
| UCKL1 | Marginal zone b cell        | THCA | -0.109086144 |
| UCKL1 | Memory b cell               | THCA | -0.090833822 |
| UCKL1 | Mesenchymal cell            | THCA | -0.020081929 |
| UCKL1 | Mesenchymal stem cell       | THCA | -0.251788814 |
| UCKL1 | Metabolism of xenobiotic    | THCA | 0.303240174  |
| UCKL1 | Migrating cancer stem cel   | THCA | -0.170406047 |
| UCKL1 | Mitotic_spindle             | THCA | -0.409463753 |
| UCKL1 | Monocyte                    | THCA | -0.012350644 |
| UCKL1 | Mtor_signaling_pathway      | THCA | -0.44048679  |
| UCKL1 | Mtorc1_signaling            | THCA | -0.111767744 |
| UCKL1 | Mucin type o-glycan biosy   | THCA | -0.427135363 |
| UCKL1 | Myc_targets_v1              | THCA | 0.267219993  |
| UCKL1 | Myeloid cell                | THCA | -0.117389747 |
| UCKL1 | N-glycan biosynthesis       | THCA | -0.215285765 |
| UCKL1 | Naive b cell                | THCA | 0.010708379  |
| UCKL1 | Naive cd4+ t cell           | THCA | -0.144104714 |
| UCKL1 | Naive cd8+ t cell           | THCA | -0.128097571 |
| UCKL1 | Natural killer cell         | THCA | -0.061413467 |
| UCKL1 | Natural killer t (nkt) cell | THCA | 0.09028812   |
| UCKL1 | Natural regulatory t (treg) | THCA | -0.178011098 |
| UCKL1 | Neomycin, kanamycin and     | THCA | -0.076667315 |
| UCKL1 | Neutrophil                  | THCA | -0.02272966  |
| UCKL1 | Nicotinate and nicotinami   | THCA | -0.06308876  |
| UCKL1 | Nitrogen metabolism         | THCA | -0.230279506 |
| UCKL1 | Nod_like_receptor_signal    | THCA | -0.104357886 |
| UCKL1 | Notch_signaling             | THCA | -0.051526959 |
| UCKL1 | One carbon pool by folate   | THCA | 0.006089365  |

|       |                            |      |              |
|-------|----------------------------|------|--------------|
| UCKL1 | Other glycan degradation   | THCA | 0.213866555  |
| UCKL1 | Other types of o-glycan b  | THCA | 0.227010224  |
| UCKL1 | Oxidative phosphorylatior  | THCA | 0.32885681   |
| UCKL1 | P53_pathway                | THCA | 0.044559529  |
| UCKL1 | P53_signaling_pathway      | THCA | -0.151034003 |
| UCKL1 | Pantothenate and coa bios  | THCA | 0.01361838   |
| UCKL1 | Pentose and glucuronate i  | THCA | 0.067072949  |
| UCKL1 | Pentose phosphate pathwa   | THCA | 0.099149792  |
| UCKL1 | Pericyte                   | THCA | -0.126127026 |
| UCKL1 | Phenylalanine metabolism   | THCA | 0.076020802  |
| UCKL1 | Phenylalanine, tyrosine ar | THCA | 0.138745307  |
| UCKL1 | Phosphonate and phosphir   | THCA | -0.050921922 |
| UCKL1 | Pi3k_akt_activation        | THCA | -0.371827873 |
| UCKL1 | Pi3k_akt_mtor_signaling    | THCA | -0.294924732 |
| UCKL1 | Porphyrin and chlorophyl   | THCA | 0.183047967  |
| UCKL1 | Primary bile acid biosynt  | THCA | -0.035467204 |
| UCKL1 | Propanoate metabolism      | THCA | -0.123349474 |
| UCKL1 | Purine metabolism          | THCA | 0.256218721  |
| UCKL1 | Pyrimidine metabolism      | THCA | 0.364577964  |
| UCKL1 | Pyruvate metabolism        | THCA | 0.051274755  |
| UCKL1 | Regulation_of_autophagy    | THCA | 0.017178767  |
| UCKL1 | Retinol metabolism         | THCA | 0.103726918  |
| UCKL1 | Riboflavin metabolism      | THCA | 0.12053802   |
| UCKL1 | Schmahl_pdgf_signaling     | THCA | -0.295717076 |
| UCKL1 | Selenocompound metabol     | THCA | -0.137089543 |
| UCKL1 | Signaling_by_hippo         | THCA | -0.485884836 |
| UCKL1 | Sphingolipid metabolism    | THCA | -0.317151948 |
| UCKL1 | Starch and sucrose metabo  | THCA | -0.105985469 |
| UCKL1 | Steroid biosynthesis       | THCA | 0.18207353   |
| UCKL1 | Steroid hormone biosynth   | THCA | 0.19557129   |
| UCKL1 | Sulfur metabolism          | THCA | -0.015820104 |
| UCKL1 | Synthesis and degradation  | THCA | 0.085923827  |
| UCKL1 | T helper cell              | THCA | -0.09000945  |
| UCKL1 | T helper1 (th1) cell       | THCA | -0.042039823 |
| UCKL1 | T helper17 (th17) cell     | THCA | -0.071704145 |
| UCKL1 | T helper2 (th2) cell       | THCA | -0.031586538 |
| UCKL1 | T helper9 (th9) cell       | THCA | 0.001091262  |
| UCKL1 | Taurine and hypotaurine r  | THCA | 0.252424674  |
| UCKL1 | Terpenoid backbone biosy   | THCA | -0.051070139 |
| UCKL1 | Tgf_beta_signaling_pathw   | THCA | -0.392832441 |
| UCKL1 | Thiamine metabolism        | THCA | 0.09226294   |
| UCKL1 | Tnfa_signaling_via_nfkb    | THCA | -0.059016345 |
| UCKL1 | Tryptophan metabolism      | THCA | -0.024762065 |

|       |                            |      |              |
|-------|----------------------------|------|--------------|
| UCKL1 | Tumor endothelial cell     | THCA | -0.020028264 |
| UCKL1 | Tyrosine metabolism        | THCA | 0.132673588  |
| UCKL1 | Ubiquinone and other ter   | THCA | 0.154368199  |
| UCKL1 | Valine, leucine and isoleu | THCA | 0.225114561  |
| UCKL1 | Valine, leucine and isoleu | THCA | -0.053802805 |
| UCKL1 | Vascular endothelial cell  | THCA | -0.101225124 |
| UCKL1 | Vascular smooth muscle c   | THCA | -0.086836126 |
| UCKL1 | Vegf_signaling_pathway     | THCA | -0.149960447 |
| UCKL1 | Vitamin b6 metabolism      | THCA | 0.023819921  |
| UCKL1 | Willert_wnt_signaling      | THCA | -0.107620965 |
| UCKL1 | Wnt_beta_catenin_signali   | THCA | -0.158903043 |
| UPP1  | Abnormal plasma cell       | THCA | -0.296385145 |
| UPP1  | Activated b cell           | THCA | 0.307113657  |
| UPP1  | Activated cd4+ t cell      | THCA | 0.199295436  |
| UPP1  | Activated t cell           | THCA | 0.244196636  |
| UPP1  | Alanine, aspartate and glu | THCA | 0.115136172  |
| UPP1  | Alcala_apoptosis           | THCA | 0.38458072   |
| UPP1  | Alpha-linolenic acid meta  | THCA | 0.223302106  |
| UPP1  | Amino sugar and nucleoti   | THCA | 0.272080309  |
| UPP1  | Ampk_pathway               | THCA | -0.329693954 |
| UPP1  | Angiogenesis               | THCA | 0.3572065    |
| UPP1  | Arachidonic acid metabol   | THCA | 0.539122847  |
| UPP1  | Arginine and proline metæ  | THCA | -0.313846558 |
| UPP1  | Arginine biosynthesis      | THCA | -0.054518949 |
| UPP1  | Ascorbate and aldarate me  | THCA | -0.464030638 |
| UPP1  | Atypical memory b cell     | THCA | -0.021499294 |
| UPP1  | Axl+siglec6+ dendritic ce  | THCA | 0.455744814  |
| UPP1  | B cell                     | THCA | 0.191066752  |
| UPP1  | B1 cell                    | THCA | 0.276154532  |
| UPP1  | Basal cell                 | THCA | 0.667881637  |
| UPP1  | Beta-alanine metabolism    | THCA | -0.389970852 |
| UPP1  | Biosynthesis of unsaturate | THCA | -0.13063179  |
| UPP1  | Biotin metabolism          | THCA | -0.317714069 |
| UPP1  | Butanoate metabolism       | THCA | -0.525761187 |
| UPP1  | Caffeine metabolism        | THCA | -0.045888993 |
| UPP1  | Cancer stem cell           | THCA | 0.292526691  |
| UPP1  | Cancer stem-like cell      | THCA | 0.076037727  |
| UPP1  | Cd4+ cytotoxic t cell      | THCA | 0.198854742  |
| UPP1  | Cd4+ memory t cell         | THCA | -0.0102342   |
| UPP1  | Cd4+ regulatory t cell     | THCA | 0.346613278  |
| UPP1  | Cd4+ t helper cell         | THCA | 0.251351435  |
| UPP1  | Cd4+cd25+ regulatory t c   | THCA | 0.273644932  |
| UPP1  | Cd8+ cytotoxic t cell      | THCA | 0.180592703  |

|      |                              |      |              |
|------|------------------------------|------|--------------|
| UPP1 | Cd8+ regulatory t cell       | THCA | 0.139608234  |
| UPP1 | Cell_cycle                   | THCA | 0.302155911  |
| UPP1 | Chandran_metastasis_top5     | THCA | -0.215668254 |
| UPP1 | Citrate cycle (tca cycle)    | THCA | -0.302637883 |
| UPP1 | Cysteine and methionine r    | THCA | -0.046631283 |
| UPP1 | Cytokine induced killer cε   | THCA | -0.074920861 |
| UPP1 | D-arginine and d-ornithin    | THCA | 0.060226759  |
| UPP1 | D-glutamine and d-glutan     | THCA | 0.449311805  |
| UPP1 | Dendritic cell               | THCA | 0.320449757  |
| UPP1 | Dna_repair                   | THCA | 0.188369949  |
| UPP1 | Dna_replication              | THCA | 0.301349107  |
| UPP1 | Double-negative memory       | THCA | -0.150057526 |
| UPP1 | Drug metabolism - cytoch     | THCA | -0.042058572 |
| UPP1 | Drug metabolism - other (    | THCA | 0.134872461  |
| UPP1 | E2f_targets                  | THCA | 0.081204469  |
| UPP1 | Ecm_receptor_interaction     | THCA | 0.259052991  |
| UPP1 | Effector cd4+ memory t (     | THCA | 0.206854974  |
| UPP1 | Effector cd8+ memory t (     | THCA | 0.361924284  |
| UPP1 | Effector memory t cell       | THCA | 0.113155748  |
| UPP1 | Effector regulatory t (treg  | THCA | 0.25537433   |
| UPP1 | Elvidge_hif1a_targets_up     | THCA | -0.105513378 |
| UPP1 | Endothelial cell             | THCA | -0.206915847 |
| UPP1 | Eosinophil                   | THCA | 0.412482211  |
| UPP1 | Ether lipid metabolism       | THCA | 0.282816875  |
| UPP1 | Exhausted cd4+ t cell        | THCA | 0.309981967  |
| UPP1 | Exhausted cd8+ t cell        | THCA | 0.380803278  |
| UPP1 | Exhausted t cell             | THCA | 0.240036084  |
| UPP1 | Fat cell (adipocyte)         | THCA | -0.19604048  |
| UPP1 | Fatty acid biosynthesis      | THCA | -0.196324669 |
| UPP1 | Fatty acid degradation       | THCA | -0.46458538  |
| UPP1 | Fatty acid elongation        | THCA | -0.037130627 |
| UPP1 | Fibroblast                   | THCA | 0.207451425  |
| UPP1 | Folate biosynthesis          | THCA | -0.184922305 |
| UPP1 | Follicular b cell            | THCA | 0.165325161  |
| UPP1 | Follicular dendritic cell    | THCA | 0.170091141  |
| UPP1 | Follicular helper (tfh) t ce | THCA | 0.287918344  |
| UPP1 | Follicular t cell            | THCA | 0.077568371  |
| UPP1 | Foxp3+il-17+ t cell          | THCA | 0.380137285  |
| UPP1 | Fructose and mannose me      | THCA | -0.129683995 |
| UPP1 | G2m_checkpoint               | THCA | 0.040361077  |
| UPP1 | Galactose metabolism         | THCA | 0.106238609  |
| UPP1 | Galie_tumor_stemness_ge      | THCA | 0.228291163  |
| UPP1 | Glutathione metabolism       | THCA | 0.221839715  |



|      |                                           |      |              |
|------|-------------------------------------------|------|--------------|
| UPP1 | Glycerolipid metabolism                   | THCA | -0.452665608 |
| UPP1 | Glycerophospholipid metabolism            | THCA | 0.217681531  |
| UPP1 | Glycine, serine and threonine metabolism  | THCA | -0.477214052 |
| UPP1 | Glycolysis / gluconeogenesis              | THCA | -0.268180849 |
| UPP1 | Glycosaminoglycan biosynthesis            | THCA | 0.276725206  |
| UPP1 | Glycosaminoglycan biosynthesis            | THCA | -0.0072739   |
| UPP1 | Glycosaminoglycan biosynthesis            | THCA | 0.357099215  |
| UPP1 | Glycosaminoglycan degradation             | THCA | 0.638269091  |
| UPP1 | Glycosphingolipid biosynthesis            | THCA | 0.328879862  |
| UPP1 | Glycosphingolipid biosynthesis            | THCA | 0.410541326  |
| UPP1 | Glycosphingolipid biosynthesis            | THCA | 0.443020303  |
| UPP1 | Glycosylphosphatidylinositol biosynthesis | THCA | -0.232944801 |
| UPP1 | Glyoxylate and dicarboxylate metabolism   | THCA | -0.290374714 |
| UPP1 | Granulocyte                               | THCA | 0.326589587  |
| UPP1 | Hedgehog signaling                        | THCA | -0.076303965 |
| UPP1 | Histidine metabolism                      | THCA | -0.154691159 |
| UPP1 | Hypoxia                                   | THCA | 0.347059558  |
| UPP1 | Il-17alpha t cell                         | THCA | 0.264683009  |
| UPP1 | Il2_stat5_signaling                       | THCA | 0.572499285  |
| UPP1 | Il6_jak_stat3_signaling                   | THCA | 0.475499986  |
| UPP1 | Immune_checkpoints_turnover               | THCA | 0.673663133  |
| UPP1 | Immune_inhibition_cytokines               | THCA | 0.433927914  |
| UPP1 | Inositol phosphate metabolism             | THCA | -0.130071915 |
| UPP1 | Interleukin_6_signaling                   | THCA | 0.219122163  |
| UPP1 | Jaeger_metastasis_up                      | THCA | 0.258950823  |
| UPP1 | Jain_nfkb_signaling                       | THCA | -0.032666051 |
| UPP1 | Kras_signaling_up                         | THCA | 0.508279022  |
| UPP1 | Linoleic acid metabolism                  | THCA | 0.237736405  |
| UPP1 | Lipoic acid metabolism                    | THCA | -0.366890693 |
| UPP1 | Lysine degradation                        | THCA | -0.654984975 |
| UPP1 | Lysosome                                  | THCA | 0.557320958  |
| UPP1 | M1 macrophage                             | THCA | 0.418259622  |
| UPP1 | M2 macrophage                             | THCA | 0.348357057  |
| UPP1 | Mannose type o-glycan biosynthesis        | THCA | -0.231510402 |
| UPP1 | Mapk_signaling_pathway                    | THCA | 0.298042087  |
| UPP1 | Mapk3_erk1_activation                     | THCA | 0.116942701  |
| UPP1 | Marginal zone b cell                      | THCA | 0.067078231  |
| UPP1 | Memory b cell                             | THCA | 0.061833899  |
| UPP1 | Mesenchymal cell                          | THCA | 0.357052322  |
| UPP1 | Mesenchymal stem cell                     | THCA | 0.170594663  |
| UPP1 | Metabolism of xenobiotics                 | THCA | 0.229156656  |
| UPP1 | Migrating cancer stem cell                | THCA | 0.57145467   |
| UPP1 | Mitotic_spindle                           | THCA | 0.124468138  |

|      |                                                   |      |              |
|------|---------------------------------------------------|------|--------------|
| UPP1 | Monocyte                                          | THCA | 0.534779127  |
| UPP1 | Mtor_signaling_pathway                            | THCA | -0.094858062 |
| UPP1 | Mtorc1_signaling                                  | THCA | -0.042850255 |
| UPP1 | Mucin type o-glycan biosynthesis                  | THCA | 0.270884757  |
| UPP1 | Myc_targets_v1                                    | THCA | 0.2753858    |
| UPP1 | Myeloid cell                                      | THCA | 0.327704694  |
| UPP1 | N-glycan biosynthesis                             | THCA | -0.259243961 |
| UPP1 | Naive b cell                                      | THCA | -0.132805577 |
| UPP1 | Naive cd4+ t cell                                 | THCA | 0.330472925  |
| UPP1 | Naive cd8+ t cell                                 | THCA | 0.191709206  |
| UPP1 | Natural killer cell                               | THCA | 0.343091829  |
| UPP1 | Natural killer t (nkt) cell                       | THCA | 0.315183055  |
| UPP1 | Natural regulatory t (treg) cell                  | THCA | 0.269436042  |
| UPP1 | Neomycin, kanamycin and streptomycin              | THCA | -0.105887666 |
| UPP1 | Neutrophil                                        | THCA | 0.600295848  |
| UPP1 | Nicotinate and nicotinamide metabolism            | THCA | -0.012307027 |
| UPP1 | Nitrogen metabolism                               | THCA | -0.383301017 |
| UPP1 | Nod_like_receptor_signaling                       | THCA | 0.415175599  |
| UPP1 | Notch_signaling                                   | THCA | 0.205410841  |
| UPP1 | One carbon pool by folate                         | THCA | 0.243882338  |
| UPP1 | Other glycan degradation                          | THCA | 0.205243083  |
| UPP1 | Other types of o-glycan biosynthesis              | THCA | -0.089241034 |
| UPP1 | Oxidative phosphorylation                         | THCA | -0.091674711 |
| UPP1 | P53_pathway                                       | THCA | 0.750100308  |
| UPP1 | P53_signaling_pathway                             | THCA | 0.543142251  |
| UPP1 | Pantothenate and coenzyme a biosynthesis          | THCA | -0.072582442 |
| UPP1 | Pentose and glucuronate interconversions          | THCA | -0.014021756 |
| UPP1 | Pentose phosphate pathway                         | THCA | -0.033150439 |
| UPP1 | Pericyte                                          | THCA | -0.000212898 |
| UPP1 | Phenylalanine metabolism                          | THCA | 0.135674622  |
| UPP1 | Phenylalanine, tyrosine and tryptophan metabolism | THCA | 0.048445789  |
| UPP1 | Phosphonate and phosphonate metabolism            | THCA | 0.146917967  |
| UPP1 | Pi3k_akt_activation                               | THCA | 0.154404331  |
| UPP1 | Pi3k_akt_mtor_signaling                           | THCA | 0.09477839   |
| UPP1 | Porphyrin and chlorophyll metabolism              | THCA | -0.267186187 |
| UPP1 | Primary bile acid biosynthesis                    | THCA | -0.265021398 |
| UPP1 | Propanoate metabolism                             | THCA | -0.543050953 |
| UPP1 | Purine metabolism                                 | THCA | 0.174136457  |
| UPP1 | Pyrimidine metabolism                             | THCA | 0.307712908  |
| UPP1 | Pyruvate metabolism                               | THCA | -0.378331109 |
| UPP1 | Regulation_of_autophagy                           | THCA | -0.123213824 |
| UPP1 | Retinol metabolism                                | THCA | 0.030241548  |
| UPP1 | Riboflavin metabolism                             | THCA | 0.146269084  |

|      |                            |      |              |
|------|----------------------------|------|--------------|
| UPP1 | Schmahl_pdgf_signaling     | THCA | 0.219269694  |
| UPP1 | Selenocompound metabol     | THCA | -0.467055579 |
| UPP1 | Signaling_by_hippo         | THCA | -0.009147337 |
| UPP1 | Sphingolipid metabolism    | THCA | 0.002930565  |
| UPP1 | Starch and sucrose metabo  | THCA | -0.197836078 |
| UPP1 | Steroid biosynthesis       | THCA | 0.01644495   |
| UPP1 | Steroid hormone biosynth   | THCA | -0.171446646 |
| UPP1 | Sulfur metabolism          | THCA | 0.409843573  |
| UPP1 | Synthesis and degradation  | THCA | -0.439267677 |
| UPP1 | T helper cell              | THCA | 0.35824346   |
| UPP1 | T helper1 (th1) cell       | THCA | 0.489768553  |
| UPP1 | T helper17 (th17) cell     | THCA | 0.371707303  |
| UPP1 | T helper2 (th2) cell       | THCA | 0.472451638  |
| UPP1 | T helper9 (th9) cell       | THCA | 0.31316521   |
| UPP1 | Taurine and hypotaurine r  | THCA | 0.122225795  |
| UPP1 | Terpenoid backbone biosy   | THCA | -0.43829402  |
| UPP1 | Tgf_beta_signaling_pathw   | THCA | -0.062115399 |
| UPP1 | Thiamine metabolism        | THCA | -0.301744364 |
| UPP1 | Tnfa_signaling_via_nfb     | THCA | 0.555780071  |
| UPP1 | Tryptophan metabolism      | THCA | -0.349991113 |
| UPP1 | Tumor endothelial cell     | THCA | 0.03424021   |
| UPP1 | Tyrosine metabolism        | THCA | -0.001799681 |
| UPP1 | Ubiquinone and other terq  | THCA | -0.232600971 |
| UPP1 | Valine, leucine and isoleu | THCA | 0.009633009  |
| UPP1 | Valine, leucine and isoleu | THCA | -0.526531088 |
| UPP1 | Vascular endothelial cell  | THCA | -0.082760197 |
| UPP1 | Vascular smooth muscle c   | THCA | -0.172285728 |
| UPP1 | Vegf_signaling_pathway     | THCA | 0.270326376  |
| UPP1 | Vitamin b6 metabolism      | THCA | -0.296399387 |
| UPP1 | Willert_wnt_signaling      | THCA | -0.175860763 |
| UPP1 | Wnt_beta_catenin_signali   | THCA | -0.008603162 |
| UPP2 | Abnormal plasma cell       | THCA | -0.523222649 |
| UPP2 | Activated b cell           | THCA | -0.015766783 |
| UPP2 | Activated cd4+ t cell      | THCA | -0.078860042 |
| UPP2 | Activated t cell           | THCA | -0.060249232 |
| UPP2 | Alanine, aspartate and glu | THCA | -0.255855092 |
| UPP2 | Alcala_apoptosis           | THCA | -0.221589223 |
| UPP2 | Alpha-linolenic acid meta  | THCA | -0.021435294 |
| UPP2 | Amino sugar and nucleoti   | THCA | -0.326511748 |
| UPP2 | Ampk_pathway               | THCA | -0.203417348 |
| UPP2 | Angiogenesis               | THCA | 0.077405535  |
| UPP2 | Arachidonic acid metabol   | THCA | 0.148969154  |
| UPP2 | Arginine and proline metæ  | THCA | -0.503327687 |

|      |                             |      |              |
|------|-----------------------------|------|--------------|
| UPP2 | Arginine biosynthesis       | THCA | -0.313698273 |
| UPP2 | Ascorbate and aldarate me   | THCA | -0.366637399 |
| UPP2 | Atypical memory b cell      | THCA | -0.070938281 |
| UPP2 | Axl+siglec6+ dendritic ce   | THCA | 0.010096492  |
| UPP2 | B cell                      | THCA | -0.07426432  |
| UPP2 | B1 cell                     | THCA | -0.046785064 |
| UPP2 | Basal cell                  | THCA | 0.250553144  |
| UPP2 | Beta-alanine metabolism     | THCA | -0.491576806 |
| UPP2 | Biosynthesis of unsaturate  | THCA | -0.35868736  |
| UPP2 | Biotin metabolism           | THCA | -0.21371883  |
| UPP2 | Butanoate metabolism        | THCA | -0.437625404 |
| UPP2 | Caffeine metabolism         | THCA | -0.047377356 |
| UPP2 | Cancer stem cell            | THCA | 0.132737093  |
| UPP2 | Cancer stem-like cell       | THCA | -0.106697581 |
| UPP2 | Cd4+ cytotoxic t cell       | THCA | -0.143856779 |
| UPP2 | Cd4+ memory t cell          | THCA | -0.103522036 |
| UPP2 | Cd4+ regulatory t cell      | THCA | -0.010136138 |
| UPP2 | Cd4+ t helper cell          | THCA | -0.033262438 |
| UPP2 | Cd4+cd25+ regulatory t c    | THCA | -0.033452625 |
| UPP2 | Cd8+ cytotoxic t cell       | THCA | -0.131176669 |
| UPP2 | Cd8+ regulatory t cell      | THCA | -0.11039652  |
| UPP2 | Cell_cycle                  | THCA | -0.040823199 |
| UPP2 | Chandran_metastasis_top5    | THCA | -0.11974661  |
| UPP2 | Citrate cycle (tca cycle)   | THCA | -0.517516514 |
| UPP2 | Cysteine and methionine r   | THCA | -0.430469864 |
| UPP2 | Cytokine induced killer c   | THCA | -0.352217185 |
| UPP2 | D-arginine and d-ornithin   | THCA | 0.008344332  |
| UPP2 | D-glutamine and d-glutan    | THCA | 0.165196351  |
| UPP2 | Dendritic cell              | THCA | -0.001573209 |
| UPP2 | Dna_repair                  | THCA | -0.019502689 |
| UPP2 | Dna_replication             | THCA | -0.00382837  |
| UPP2 | Double-negative memory      | THCA | -0.098215    |
| UPP2 | Drug metabolism - cytoch    | THCA | -0.108027242 |
| UPP2 | Drug metabolism - other     | THCA | -0.13672599  |
| UPP2 | E2f_targets                 | THCA | -0.114689825 |
| UPP2 | Ecm_receptor_interaction    | THCA | 0.101679153  |
| UPP2 | Effector cd4+ memory t (    | THCA | -0.047476235 |
| UPP2 | Effector cd8+ memory t (    | THCA | -0.076773368 |
| UPP2 | Effector memory t cell      | THCA | -0.062626188 |
| UPP2 | Effector regulatory t (treg | THCA | -0.02723874  |
| UPP2 | Elvidge_hif1a_targets_up    | THCA | -0.477351806 |
| UPP2 | Endothelial cell            | THCA | -0.111582574 |
| UPP2 | Eosinophil                  | THCA | 0.021056877  |

|      |                              |      |              |
|------|------------------------------|------|--------------|
| UPP2 | Ether lipid metabolism       | THCA | 0.047738024  |
| UPP2 | Exhausted cd4+ t cell        | THCA | -0.006796436 |
| UPP2 | Exhausted cd8+ t cell        | THCA | 0.050658692  |
| UPP2 | Exhausted t cell             | THCA | -0.049450691 |
| UPP2 | Fat cell (adipocyte)         | THCA | -0.311582269 |
| UPP2 | Fatty acid biosynthesis      | THCA | -0.387398312 |
| UPP2 | Fatty acid degradation       | THCA | -0.509760583 |
| UPP2 | Fatty acid elongation        | THCA | -0.258091414 |
| UPP2 | Fibroblast                   | THCA | 0.070583491  |
| UPP2 | Folate biosynthesis          | THCA | -0.363460396 |
| UPP2 | Follicular b cell            | THCA | 0.039146667  |
| UPP2 | Follicular dendritic cell    | THCA | -0.016992249 |
| UPP2 | Follicular helper (tfh) t ce | THCA | -0.02916259  |
| UPP2 | Follicular t cell            | THCA | -0.047452327 |
| UPP2 | Foxp3+il-17+ t cell          | THCA | -0.007614991 |
| UPP2 | Fructose and mannose me      | THCA | -0.394411517 |
| UPP2 | G2m_checkpoint               | THCA | -0.079478979 |
| UPP2 | Galactose metabolism         | THCA | -0.327305162 |
| UPP2 | Galie_tumor_stemness_ge      | THCA | 0.199561677  |
| UPP2 | Glutathione metabolism       | THCA | -0.225142739 |
| UPP2 | Glycerolipid metabolism      | THCA | -0.370089484 |
| UPP2 | Glycerophospholipid met&     | THCA | 0.067657554  |
| UPP2 | Glycine, serine and threor   | THCA | -0.426021502 |
| UPP2 | Glycolysis / gluconeogene    | THCA | -0.485098744 |
| UPP2 | Glycosaminoglycan biosy      | THCA | 0.12351249   |
| UPP2 | Glycosaminoglycan biosy      | THCA | 0.065750233  |
| UPP2 | Glycosaminoglycan biosy      | THCA | 0.130536039  |
| UPP2 | Glycosaminoglycan degra      | THCA | 0.136019347  |
| UPP2 | Glycosphingolipid biosyn     | THCA | 0.09985286   |
| UPP2 | Glycosphingolipid biosyn     | THCA | -0.086454131 |
| UPP2 | Glycosphingolipid biosyn     | THCA | -0.048336286 |
| UPP2 | Glycosylphosphatidylinos     | THCA | -0.160365985 |
| UPP2 | Glyoxylate and dicarboxy     | THCA | -0.436061973 |
| UPP2 | Granulocyte                  | THCA | -0.029030221 |
| UPP2 | Hedgehog_signaling           | THCA | 0.017383927  |
| UPP2 | Histidine metabolism         | THCA | -0.262195654 |
| UPP2 | Hypoxia                      | THCA | -0.047818872 |
| UPP2 | Il-17ralpha t cell           | THCA | -0.048966904 |
| UPP2 | Il2_stat5_signaling          | THCA | 0.073087201  |
| UPP2 | Il6_jak_stat3_signaling      | THCA | 0.048257415  |
| UPP2 | Immune_checkpoints_tur       | THCA | 0.224335653  |
| UPP2 | Immune_inhibition_cytok      | THCA | 0.036555776  |
| UPP2 | Inositol phosphate metabo    | THCA | -0.138233799 |

|      |                             |      |              |
|------|-----------------------------|------|--------------|
| UPP2 | Interleukin_6_signaling     | THCA | 0.012231676  |
| UPP2 | Jaeger_metastasis_up        | THCA | -0.180962178 |
| UPP2 | Jain_nfkb_signaling         | THCA | -0.272481156 |
| UPP2 | Kras_signaling_up           | THCA | 0.113603371  |
| UPP2 | Linoleic acid metabolism    | THCA | 0.218985874  |
| UPP2 | Lipoic acid metabolism      | THCA | 0.094036212  |
| UPP2 | Lysine degradation          | THCA | -0.422583916 |
| UPP2 | Lysosome                    | THCA | -0.043670032 |
| UPP2 | M1 macrophage               | THCA | 0.006024659  |
| UPP2 | M2 macrophage               | THCA | -0.05257093  |
| UPP2 | Mannose type o-glycan bi    | THCA | -0.075110677 |
| UPP2 | Mapk_signaling_pathway      | THCA | -0.026279303 |
| UPP2 | Mapk3_erk1_activation       | THCA | -0.165529971 |
| UPP2 | Marginal zone b cell        | THCA | -0.070602252 |
| UPP2 | Memory b cell               | THCA | -0.114925711 |
| UPP2 | Mesenchymal cell            | THCA | 0.169942662  |
| UPP2 | Mesenchymal stem cell       | THCA | -0.024755247 |
| UPP2 | Metabolism of xenobiotic    | THCA | -0.003597459 |
| UPP2 | Migrating cancer stem cel   | THCA | 0.294933898  |
| UPP2 | Mitotic_spindle             | THCA | 0.019867472  |
| UPP2 | Monocyte                    | THCA | 0.055624068  |
| UPP2 | Mtor_signaling_pathway      | THCA | -0.17124154  |
| UPP2 | Mtorc1_signaling            | THCA | -0.50411794  |
| UPP2 | Mucin type o-glycan biosy   | THCA | 0.094648856  |
| UPP2 | Myc_targets_v1              | THCA | -0.078079474 |
| UPP2 | Myeloid cell                | THCA | -0.00886645  |
| UPP2 | N-glycan biosynthesis       | THCA | -0.214699331 |
| UPP2 | Naive b cell                | THCA | -0.12417625  |
| UPP2 | Naive cd4+ t cell           | THCA | 0.181029332  |
| UPP2 | Naive cd8+ t cell           | THCA | 0.281997624  |
| UPP2 | Natural killer cell         | THCA | -0.011920713 |
| UPP2 | Natural killer t (nkt) cell | THCA | -0.082815872 |
| UPP2 | Natural regulatory t (treg) | THCA | 0.114067093  |
| UPP2 | Neomycin, kanamycin an      | THCA | -0.184890369 |
| UPP2 | Neutrophil                  | THCA | 0.06355386   |
| UPP2 | Nicotinate and nicotinami   | THCA | -0.458495445 |
| UPP2 | Nitrogen metabolism         | THCA | -0.03482851  |
| UPP2 | Nod_like_receptor_signal    | THCA | 0.025280237  |
| UPP2 | Notch_signaling             | THCA | 0.079548491  |
| UPP2 | One carbon pool by folate   | THCA | -0.093858893 |
| UPP2 | Other glycan degradation    | THCA | -0.069407767 |
| UPP2 | Other types of o-glycan b   | THCA | 0.045333046  |
| UPP2 | Oxidative phosphorylatior   | THCA | -0.328372513 |

|      |                            |      |              |
|------|----------------------------|------|--------------|
| UPP2 | P53_pathway                | THCA | 0.185599708  |
| UPP2 | P53_signaling_pathway      | THCA | 0.01792699   |
| UPP2 | Pantothenate and coa bios  | THCA | -0.479920819 |
| UPP2 | Pentose and glucuronate i  | THCA | -0.247174157 |
| UPP2 | Pentose phosphate pathwa   | THCA | -0.408107611 |
| UPP2 | Pericyte                   | THCA | -0.060896945 |
| UPP2 | Phenylalanine metabolism   | THCA | -0.205747979 |
| UPP2 | Phenylalanine, tyrosine ar | THCA | -0.388917833 |
| UPP2 | Phosphonate and phosphir   | THCA | -0.032196893 |
| UPP2 | Pi3k_akt_activation        | THCA | -0.021608116 |
| UPP2 | Pi3k_akt_mtor_signaling    | THCA | -0.469245279 |
| UPP2 | Porphyrin and chlorophyl   | THCA | -0.384780513 |
| UPP2 | Primary bile acid biosynt  | THCA | -0.296552256 |
| UPP2 | Propanoate metabolism      | THCA | -0.476245224 |
| UPP2 | Purine metabolism          | THCA | -0.211368506 |
| UPP2 | Pyrimidine metabolism      | THCA | -0.057210165 |
| UPP2 | Pyruvate metabolism        | THCA | -0.512631351 |
| UPP2 | Regulation_of_autophagy    | THCA | -0.257251163 |
| UPP2 | Retinol metabolism         | THCA | -0.008618557 |
| UPP2 | Riboflavin metabolism      | THCA | -0.289758945 |
| UPP2 | Schmahl_pdgf_signaling     | THCA | 0.201069292  |
| UPP2 | Selenocompound metabol     | THCA | -0.318664599 |
| UPP2 | Signaling_by_hippo         | THCA | -0.008164678 |
| UPP2 | Sphingolipid metabolism    | THCA | -0.090473117 |
| UPP2 | Starch and sucrose metabo  | THCA | -0.452934803 |
| UPP2 | Steroid biosynthesis       | THCA | -0.131129619 |
| UPP2 | Steroid hormone biosynth   | THCA | -0.081752346 |
| UPP2 | Sulfur metabolism          | THCA | -0.07705047  |
| UPP2 | Synthesis and degradation  | THCA | -0.383312068 |
| UPP2 | T helper cell              | THCA | 0.052002379  |
| UPP2 | T helper1 (th1) cell       | THCA | 0.102454843  |
| UPP2 | T helper17 (th17) cell     | THCA | 0.02322124   |
| UPP2 | T helper2 (th2) cell       | THCA | 0.08239861   |
| UPP2 | T helper9 (th9) cell       | THCA | -0.024358296 |
| UPP2 | Taurine and hypotaurine r  | THCA | 0.116134591  |
| UPP2 | Terpenoid backbone biosy   | THCA | -0.39406781  |
| UPP2 | Tgf_beta_signaling_pathw   | THCA | 0.014226975  |
| UPP2 | Thiamine metabolism        | THCA | -0.223106321 |
| UPP2 | Tnfa_signaling_via_nfkb    | THCA | 0.160463013  |
| UPP2 | Tryptophan metabolism      | THCA | -0.430625725 |
| UPP2 | Tumor endothelial cell     | THCA | -0.07436591  |
| UPP2 | Tyrosine metabolism        | THCA | -0.251580693 |
| UPP2 | Ubiquinone and other ter   | THCA | -0.293579815 |

|      |                            |      |              |
|------|----------------------------|------|--------------|
| UPP2 | Valine, leucine and isoleu | THCA | -0.285650745 |
| UPP2 | Valine, leucine and isoleu | THCA | -0.501583325 |
| UPP2 | Vascular endothelial cell  | THCA | 0.051572655  |
| UPP2 | Vascular smooth muscle c   | THCA | -0.077922237 |
| UPP2 | Vegf_signaling_pathway     | THCA | -0.18109335  |
| UPP2 | Vitamin b6 metabolism      | THCA | -0.434133465 |
| UPP2 | Willert_wnt_signaling      | THCA | -0.298596707 |
| UPP2 | Wnt_beta_catenin_signali   | THCA | 0.157228441  |
| CDA  | Abnormal plasma cell       | THYM | 0.189685238  |
| CDA  | Activated b cell           | THYM | 0.034819559  |
| CDA  | Activated cd4+ t cell      | THYM | -0.050344263 |
| CDA  | Activated t cell           | THYM | -0.102306919 |
| CDA  | Alanine, aspartate and glu | THYM | 0.122671656  |
| CDA  | Alcala_apoptosis           | THYM | -0.044560757 |
| CDA  | Alpha-linolenic acid meta  | THYM | 0.428364939  |
| CDA  | Amino sugar and nucleoti   | THYM | 0.204049045  |
| CDA  | Ampk_pathway               | THYM | -0.281891849 |
| CDA  | Angiogenesis               | THYM | 0.358915103  |
| CDA  | Arachidonic acid metabol:  | THYM | 0.461833482  |
| CDA  | Arginine and proline metæ  | THYM | 0.343260312  |
| CDA  | Arginine biosynthesis      | THYM | 0.196974703  |
| CDA  | Ascorbate and aldarate mε  | THYM | 0.282263923  |
| CDA  | Atypical memory b cell     | THYM | -0.161929987 |
| CDA  | Axl+siglec6+ dendritic ce  | THYM | 0.171167556  |
| CDA  | B cell                     | THYM | -0.011046348 |
| CDA  | B1 cell                    | THYM | -0.155341284 |
| CDA  | Basal cell                 | THYM | 0.528287801  |
| CDA  | Beta-alanine metabolism    | THYM | 0.232182109  |
| CDA  | Biosynthesis of unsaturate | THYM | -0.002265996 |
| CDA  | Biotin metabolism          | THYM | 0.116174143  |
| CDA  | Butanoate metabolism       | THYM | -0.078956002 |
| CDA  | Caffeine metabolism        | THYM | 0.045170535  |
| CDA  | Cancer stem cell           | THYM | 0.250765176  |
| CDA  | Cancer stem-like cell      | THYM | 0.198631206  |
| CDA  | Cd4+ cytotoxic t cell      | THYM | 0.189401674  |
| CDA  | Cd4+ memory t cell         | THYM | -0.053729992 |
| CDA  | Cd4+ regulatory t cell     | THYM | -0.018042049 |
| CDA  | Cd4+ t helper cell         | THYM | -0.215864699 |
| CDA  | Cd4+cd25+ regulatory t c   | THYM | -0.208497885 |
| CDA  | Cd8+ cytotoxic t cell      | THYM | -0.02636012  |
| CDA  | Cd8+ regulatory t cell     | THYM | -0.171299306 |
| CDA  | Cell_cycle                 | THYM | -0.339317752 |
| CDA  | Chandran_metastasis_topδ   | THYM | -0.367014777 |



|     |                              |      |              |
|-----|------------------------------|------|--------------|
| CDA | Citrate cycle (tca cycle)    | THYM | -0.078085502 |
| CDA | Cysteine and methionine r    | THYM | -0.077845977 |
| CDA | Cytokine induced killer c    | THYM | -0.17328282  |
| CDA | D-arginine and d-ornithin    | THYM | 0.248603967  |
| CDA | D-glutamine and d-glutan     | THYM | -0.082818412 |
| CDA | Dendritic cell               | THYM | 0.135641051  |
| CDA | Dna_repair                   | THYM | 0.057074757  |
| CDA | Dna_replication              | THYM | -0.19239191  |
| CDA | Double-negative memory       | THYM | 0.127912459  |
| CDA | Drug metabolism - cytoch     | THYM | 0.316506757  |
| CDA | Drug metabolism - other      | THYM | 0.226765467  |
| CDA | E2f_targets                  | THYM | -0.256845376 |
| CDA | Ecm_receptor_interaction     | THYM | 0.181699294  |
| CDA | Effector cd4+ memory t (     | THYM | -0.178566923 |
| CDA | Effector cd8+ memory t (     | THYM | -0.01024274  |
| CDA | Effector memory t cell       | THYM | -0.164734264 |
| CDA | Effector regulatory t (treg  | THYM | -0.294363875 |
| CDA | Elvidge_hif1a_targets_up     | THYM | -0.183188355 |
| CDA | Endothelial cell             | THYM | 0.0555551    |
| CDA | Eosinophil                   | THYM | 0.109529403  |
| CDA | Ether lipid metabolism       | THYM | 0.410207244  |
| CDA | Exhausted cd4+ t cell        | THYM | -0.128643356 |
| CDA | Exhausted cd8+ t cell        | THYM | 0.019084854  |
| CDA | Exhausted t cell             | THYM | -0.093729679 |
| CDA | Fat cell (adipocyte)         | THYM | 0.174794865  |
| CDA | Fatty acid biosynthesis      | THYM | -0.127963988 |
| CDA | Fatty acid degradation       | THYM | 0.011079468  |
| CDA | Fatty acid elongation        | THYM | 0.062578877  |
| CDA | Fibroblast                   | THYM | 0.230589354  |
| CDA | Folate biosynthesis          | THYM | 0.226352526  |
| CDA | Follicular b cell            | THYM | 0.005974636  |
| CDA | Follicular dendritic cell    | THYM | 0.027681114  |
| CDA | Follicular helper (tfh) t ce | THYM | -0.123881808 |
| CDA | Follicular t cell            | THYM | -0.054240089 |
| CDA | Foxp3+il-17+ t cell          | THYM | 0.143084303  |
| CDA | Fructose and mannose me      | THYM | 0.238207863  |
| CDA | G2m_checkpoint               | THYM | -0.342080516 |
| CDA | Galactose metabolism         | THYM | 0.057282888  |
| CDA | Galie_tumor_stemness_ge      | THYM | 0.064344574  |
| CDA | Glutathione metabolism       | THYM | 0.289397262  |
| CDA | Glycerolipid metabolism      | THYM | 0.124555732  |
| CDA | Glycerophospholipid met      | THYM | 0.449445086  |
| CDA | Glycine, serine and threor   | THYM | 0.209279691  |

|     |                           |      |              |
|-----|---------------------------|------|--------------|
| CDA | Glycolysis / gluconeogene | THYM | 0.204804916  |
| CDA | Glycosaminoglycan biosyn  | THYM | 0.327706351  |
| CDA | Glycosaminoglycan biosyn  | THYM | 0.136340687  |
| CDA | Glycosaminoglycan biosyn  | THYM | -0.085866736 |
| CDA | Glycosaminoglycan degra   | THYM | 0.349045171  |
| CDA | Glycosphingolipid biosyn  | THYM | 0.139067641  |
| CDA | Glycosphingolipid biosyn  | THYM | 0.273237759  |
| CDA | Glycosphingolipid biosyn  | THYM | 0.34776062   |
| CDA | Glycosylphosphatidylinos  | THYM | 0.159749258  |
| CDA | Glyoxylate and dicarboxy  | THYM | -0.019844954 |
| CDA | Granulocyte               | THYM | 0.085686176  |
| CDA | Hedgehog_signaling        | THYM | -0.068530721 |
| CDA | Histidine metabolism      | THYM | 0.36910973   |
| CDA | Hypoxia                   | THYM | 0.274264759  |
| CDA | Il-17alpha t cell         | THYM | -0.24161403  |
| CDA | Il2_stat5_signaling       | THYM | 0.275440046  |
| CDA | Il6_jak_stat3_signaling   | THYM | 0.197267251  |
| CDA | Immune_checkpoints_tur    | THYM | 0.220910006  |
| CDA | Immune_inhibition_cytok   | THYM | 0.391906203  |
| CDA | Inositol phosphate metabo | THYM | -0.473483152 |
| CDA | Interleukin_6_signaling   | THYM | -0.181068006 |
| CDA | Jaeger_metastasis_up      | THYM | -0.154582286 |
| CDA | Jain_nfkb_signaling       | THYM | -0.230053204 |
| CDA | Kras_signaling_up         | THYM | 0.173367044  |
| CDA | Linoleic acid metabolism  | THYM | 0.328821964  |
| CDA | Lipoic acid metabolism    | THYM | 0.180134788  |
| CDA | Lysine degradation        | THYM | -0.335457935 |
| CDA | Lysosome                  | THYM | 0.35677977   |
| CDA | M1 macrophage             | THYM | 0.188372443  |
| CDA | M2 macrophage             | THYM | 0.290499945  |
| CDA | Mannose type o-glycan bi  | THYM | 0.195531454  |
| CDA | Mapk_signaling_pathway    | THYM | -0.018181976 |
| CDA | Mapk3_erk1_activation     | THYM | -0.291881363 |
| CDA | Marginal zone b cell      | THYM | -0.229793734 |
| CDA | Memory b cell             | THYM | 0.168560629  |
| CDA | Mesenchymal cell          | THYM | 0.252226974  |
| CDA | Mesenchymal stem cell     | THYM | 0.218669782  |
| CDA | Metabolism of xenobiotic  | THYM | 0.349780169  |
| CDA | Migrating cancer stem cel | THYM | 0.090697159  |
| CDA | Mitotic_spindle           | THYM | -0.53099772  |
| CDA | Monocyte                  | THYM | 0.224170085  |
| CDA | Mtor_signaling_pathway    | THYM | -0.363469087 |
| CDA | Mtorc1_signaling          | THYM | -0.042076058 |

|     |                                                   |      |              |
|-----|---------------------------------------------------|------|--------------|
| CDA | Mucin type o-glycan biosynthesis                  | THYM | -0.266171357 |
| CDA | Myc_targets_v1                                    | THYM | -0.115914705 |
| CDA | Myeloid cell                                      | THYM | 0.037507175  |
| CDA | N-glycan biosynthesis                             | THYM | 0.137472235  |
| CDA | Naive b cell                                      | THYM | -0.00288837  |
| CDA | Naive cd4+ t cell                                 | THYM | -0.203658408 |
| CDA | Naive cd8+ t cell                                 | THYM | -0.241273993 |
| CDA | Natural killer cell                               | THYM | -0.060400166 |
| CDA | Natural killer t (nkt) cell                       | THYM | -0.231115577 |
| CDA | Natural regulatory t (treg) cell                  | THYM | -0.307831569 |
| CDA | Neomycin, kanamycin and streptomycin              | THYM | -0.052359713 |
| CDA | Neutrophil                                        | THYM | 0.277689179  |
| CDA | Nicotinate and nicotinamide metabolism            | THYM | -0.001259537 |
| CDA | Nitrogen metabolism                               | THYM | -0.021411755 |
| CDA | Nod_like_receptor_signaling                       | THYM | 0.135415205  |
| CDA | Notch_signaling                                   | THYM | 0.179760203  |
| CDA | One carbon pool by folate                         | THYM | -0.206702925 |
| CDA | Other glycan degradation                          | THYM | 0.154468327  |
| CDA | Other types of o-glycan biosynthesis              | THYM | 0.205669543  |
| CDA | Oxidative phosphorylation                         | THYM | 0.171331827  |
| CDA | P53_pathway                                       | THYM | 0.546820034  |
| CDA | P53_signaling_pathway                             | THYM | -0.117106214 |
| CDA | Pantothenate and coenzyme a biosynthesis          | THYM | -0.135667436 |
| CDA | Pentose and glucuronate interconversions          | THYM | 0.109104295  |
| CDA | Pentose phosphate pathway                         | THYM | -0.005261403 |
| CDA | Pericyte                                          | THYM | 0.298095076  |
| CDA | Phenylalanine metabolism                          | THYM | 0.405543544  |
| CDA | Phenylalanine, tyrosine and tryptophan metabolism | THYM | 0.023451584  |
| CDA | Phosphonate and phosphite metabolism              | THYM | -0.12634136  |
| CDA | Pi3k_akt_activation                               | THYM | -0.206054923 |
| CDA | Pi3k_akt_mtor_signaling                           | THYM | -0.288133348 |
| CDA | Porphyrin and chlorophyll metabolism              | THYM | 0.247925875  |
| CDA | Primary bile acid biosynthesis                    | THYM | 0.056980614  |
| CDA | Propanoate metabolism                             | THYM | -0.177585056 |
| CDA | Purine metabolism                                 | THYM | -0.012004127 |
| CDA | Pyrimidine metabolism                             | THYM | -0.042265563 |
| CDA | Pyruvate metabolism                               | THYM | 0.081877651  |
| CDA | Regulation_of_autophagy                           | THYM | -0.049454116 |
| CDA | Retinol metabolism                                | THYM | 0.28526922   |
| CDA | Riboflavin metabolism                             | THYM | 0.267918549  |
| CDA | Schmahl_pdgf_signaling                            | THYM | 0.032107515  |
| CDA | Selenocompound metabolism                         | THYM | -0.161998336 |
| CDA | Signaling_by_hippo                                | THYM | -0.124763337 |

|      |                            |      |              |
|------|----------------------------|------|--------------|
| CDA  | Sphingolipid metabolism    | THYM | -0.157764352 |
| CDA  | Starch and sucrose metabo  | THYM | -0.040561946 |
| CDA  | Steroid biosynthesis       | THYM | 0.197728208  |
| CDA  | Steroid hormone biosynth   | THYM | 0.230910998  |
| CDA  | Sulfur metabolism          | THYM | 0.212119681  |
| CDA  | Synthesis and degradation  | THYM | -0.11415693  |
| CDA  | T helper cell              | THYM | -0.102934891 |
| CDA  | T helper1 (th1) cell       | THYM | 0.101837715  |
| CDA  | T helper17 (th17) cell     | THYM | 0.006907662  |
| CDA  | T helper2 (th2) cell       | THYM | -0.053502452 |
| CDA  | T helper9 (th9) cell       | THYM | -0.191132124 |
| CDA  | Taurine and hypotaurine r  | THYM | 0.306128698  |
| CDA  | Terpenoid backbone biosy   | THYM | 0.052061565  |
| CDA  | Tgf_beta_signaling_pathw   | THYM | -0.035363918 |
| CDA  | Thiamine metabolism        | THYM | 0.301901098  |
| CDA  | Tnfa_signaling_via_nfk     | THYM | 0.289690814  |
| CDA  | Tryptophan metabolism      | THYM | 0.255005763  |
| CDA  | Tumor endothelial cell     | THYM | 0.081935941  |
| CDA  | Tyrosine metabolism        | THYM | 0.464386892  |
| CDA  | Ubiquinone and other ter   | THYM | 0.331318164  |
| CDA  | Valine, leucine and isoleu | THYM | 0.284217634  |
| CDA  | Valine, leucine and isoleu | THYM | -0.085152057 |
| CDA  | Vascular endothelial cell  | THYM | 0.375970871  |
| CDA  | Vascular smooth muscle c   | THYM | 0.349250924  |
| CDA  | Vegf_signaling_pathway     | THYM | 0.082565905  |
| CDA  | Vitamin b6 metabolism      | THYM | 0.119921448  |
| CDA  | Willert_wnt_signaling      | THYM | 0.085350793  |
| CDA  | Wnt_beta_catenin_signali   | THYM | 0.09501211   |
| UCK1 | Abnormal plasma cell       | THYM | 0.156249144  |
| UCK1 | Activated b cell           | THYM | -0.002541626 |
| UCK1 | Activated cd4+ t cell      | THYM | -0.123135134 |
| UCK1 | Activated t cell           | THYM | 0.264468379  |
| UCK1 | Alanine, aspartate and glu | THYM | 0.072532349  |
| UCK1 | Alcala_apoptosis           | THYM | 0.414213577  |
| UCK1 | Alpha-linolenic acid meta  | THYM | 0.33137411   |
| UCK1 | Amino sugar and nucleoti   | THYM | 0.379588072  |
| UCK1 | Ampk_pathway               | THYM | 0.124469635  |
| UCK1 | Angiogenesis               | THYM | -0.260703359 |
| UCK1 | Arachidonic acid metabo    | THYM | 0.378140951  |
| UCK1 | Arginine and proline met   | THYM | 0.211055717  |
| UCK1 | Arginine biosynthesis      | THYM | 0.008492383  |
| UCK1 | Ascorbate and aldarate m   | THYM | 0.061397278  |
| UCK1 | Atypical memory b cell     | THYM | 0.122795199  |

|      |                             |      |              |
|------|-----------------------------|------|--------------|
| UCK1 | Axl+siglec6+ dendritic ce   | THYM | -0.183898209 |
| UCK1 | B cell                      | THYM | -0.193839099 |
| UCK1 | B1 cell                     | THYM | 0.141590141  |
| UCK1 | Basal cell                  | THYM | 0.012711717  |
| UCK1 | Beta-alanine metabolism     | THYM | 0.112612516  |
| UCK1 | Biosynthesis of unsaturate  | THYM | 0.59397711   |
| UCK1 | Biotin metabolism           | THYM | -0.05408329  |
| UCK1 | Butanoate metabolism        | THYM | 0.471952717  |
| UCK1 | Caffeine metabolism         | THYM | 0.049644082  |
| UCK1 | Cancer stem cell            | THYM | -0.586149505 |
| UCK1 | Cancer stem-like cell       | THYM | -0.364165777 |
| UCK1 | Cd4+ cytotoxic t cell       | THYM | -0.027581397 |
| UCK1 | Cd4+ memory t cell          | THYM | 0.110100347  |
| UCK1 | Cd4+ regulatory t cell      | THYM | -0.110932746 |
| UCK1 | Cd4+ t helper cell          | THYM | 0.268834879  |
| UCK1 | Cd4+cd25+ regulatory t c    | THYM | 0.247633281  |
| UCK1 | Cd8+ cytotoxic t cell       | THYM | 0.285386966  |
| UCK1 | Cd8+ regulatory t cell      | THYM | 0.259698831  |
| UCK1 | Cell_cycle                  | THYM | -0.052189722 |
| UCK1 | Chandran_metastasis_top5    | THYM | -0.63841634  |
| UCK1 | Citrate cycle (tca cycle)   | THYM | 0.277231841  |
| UCK1 | Cysteine and methionine r   | THYM | 0.044080269  |
| UCK1 | Cytokine induced killer ce  | THYM | 0.330286233  |
| UCK1 | D-arginine and d-ornithin   | THYM | 0.111864539  |
| UCK1 | D-glutamine and d-glutan    | THYM | -0.598472285 |
| UCK1 | Dendritic cell              | THYM | -0.027987167 |
| UCK1 | Dna_repair                  | THYM | 0.507272415  |
| UCK1 | Dna_replication             | THYM | 0.277245089  |
| UCK1 | Double-negative memory      | THYM | 0.248185251  |
| UCK1 | Drug metabolism - cytoch    | THYM | 0.459635459  |
| UCK1 | Drug metabolism - other c   | THYM | 0.636095196  |
| UCK1 | E2f_targets                 | THYM | 0.125310089  |
| UCK1 | Ecm_receptor_interaction    | THYM | -0.374540495 |
| UCK1 | Effector cd4+ memory t (    | THYM | 0.114609988  |
| UCK1 | Effector cd8+ memory t (    | THYM | -0.248876014 |
| UCK1 | Effector memory t cell      | THYM | 0.147877907  |
| UCK1 | Effector regulatory t (treg | THYM | 0.020013339  |
| UCK1 | Elvidge_hif1a_targets_up    | THYM | -0.056414896 |
| UCK1 | Endothelial cell            | THYM | -0.342099758 |
| UCK1 | Eosinophil                  | THYM | -0.039879547 |
| UCK1 | Ether lipid metabolism      | THYM | 0.167014924  |
| UCK1 | Exhausted cd4+ t cell       | THYM | -0.306373634 |
| UCK1 | Exhausted cd8+ t cell       | THYM | -0.353390447 |

|      |                              |      |              |
|------|------------------------------|------|--------------|
| UCK1 | Exhausted t cell             | THYM | 0.257644762  |
| UCK1 | Fat cell (adipocyte)         | THYM | 0.296131071  |
| UCK1 | Fatty acid biosynthesis      | THYM | 0.111941024  |
| UCK1 | Fatty acid degradation       | THYM | 0.109441723  |
| UCK1 | Fatty acid elongation        | THYM | 0.587228002  |
| UCK1 | Fibroblast                   | THYM | -0.445426531 |
| UCK1 | Folate biosynthesis          | THYM | 0.474693774  |
| UCK1 | Follicular b cell            | THYM | -0.135189162 |
| UCK1 | Follicular dendritic cell    | THYM | 0.002640157  |
| UCK1 | Follicular helper (tfh) t ce | THYM | 0.134216323  |
| UCK1 | Follicular t cell            | THYM | 0.401212076  |
| UCK1 | Foxp3+il-17+ t cell          | THYM | -0.410868877 |
| UCK1 | Fructose and mannose me      | THYM | 0.430241144  |
| UCK1 | G2m_checkpoint               | THYM | 0.011430855  |
| UCK1 | Galactose metabolism         | THYM | 0.583881678  |
| UCK1 | Galie_tumor_stemness_ge      | THYM | -0.427802633 |
| UCK1 | Glutathione metabolism       | THYM | 0.558079036  |
| UCK1 | Glycerolipid metabolism      | THYM | 0.433491869  |
| UCK1 | Glycerophospholipid metæ     | THYM | 0.501605219  |
| UCK1 | Glycine, serine and threor   | THYM | 0.509033335  |
| UCK1 | Glycolysis / gluconeogene    | THYM | 0.188141572  |
| UCK1 | Glycosaminoglycan biosy      | THYM | 0.084539871  |
| UCK1 | Glycosaminoglycan biosy      | THYM | -0.001706756 |
| UCK1 | Glycosaminoglycan biosy      | THYM | 0.025407493  |
| UCK1 | Glycosaminoglycan degra      | THYM | 0.010321089  |
| UCK1 | Glycosphingolipid biosyn     | THYM | 0.076400923  |
| UCK1 | Glycosphingolipid biosyn     | THYM | 0.049563213  |
| UCK1 | Glycosphingolipid biosyn     | THYM | -0.101005102 |
| UCK1 | Glycosylphosphatidylinos     | THYM | 0.320398202  |
| UCK1 | Glyoxylate and dicarboxy     | THYM | 0.466246267  |
| UCK1 | Granulocyte                  | THYM | -0.203960319 |
| UCK1 | Hedgehog_signaling           | THYM | -0.518609609 |
| UCK1 | Histidine metabolism         | THYM | 0.144521548  |
| UCK1 | Hypoxia                      | THYM | -0.167135723 |
| UCK1 | Il-17alpha t cell            | THYM | 0.219082522  |
| UCK1 | Il2_stat5_signaling          | THYM | -0.310226976 |
| UCK1 | Il6_jak_stat3_signaling      | THYM | -0.475423677 |
| UCK1 | Immune_checkpoints_tur       | THYM | 0.032387704  |
| UCK1 | Immune_inhibition_cytok      | THYM | 0.029552848  |
| UCK1 | Inositol phosphate metabo    | THYM | -0.574327394 |
| UCK1 | Interleukin_6_signaling      | THYM | -0.750166386 |
| UCK1 | Jaeger_metastasis_up         | THYM | -0.020301626 |
| UCK1 | Jain_nfkb_signaling          | THYM | 0.128701324  |

|      |                             |      |              |
|------|-----------------------------|------|--------------|
| UCK1 | Kras_signaling_up           | THYM | -0.459448757 |
| UCK1 | Linoleic acid metabolism    | THYM | 0.294311853  |
| UCK1 | Lipoic acid metabolism      | THYM | 0.217475526  |
| UCK1 | Lysine degradation          | THYM | -0.040169579 |
| UCK1 | Lysosome                    | THYM | 0.157817003  |
| UCK1 | M1 macrophage               | THYM | -0.500429549 |
| UCK1 | M2 macrophage               | THYM | -0.102813659 |
| UCK1 | Mannose type o-glycan bi    | THYM | 0.198338274  |
| UCK1 | Mapk_signaling_pathway      | THYM | -0.56712657  |
| UCK1 | Mapk3_erk1_activation       | THYM | -0.741376524 |
| UCK1 | Marginal zone b cell        | THYM | -0.058916367 |
| UCK1 | Memory b cell               | THYM | -0.105167541 |
| UCK1 | Mesenchymal cell            | THYM | -0.219809054 |
| UCK1 | Mesenchymal stem cell       | THYM | -0.556125341 |
| UCK1 | Metabolism of xenobiotic    | THYM | 0.527976561  |
| UCK1 | Migrating cancer stem cel   | THYM | -0.261643059 |
| UCK1 | Mitotic_spindle             | THYM | -0.487907511 |
| UCK1 | Monocyte                    | THYM | -0.141349186 |
| UCK1 | Mtor_signaling_pathway      | THYM | -0.249408721 |
| UCK1 | Mtorc1_signaling            | THYM | 0.168242036  |
| UCK1 | Mucin type o-glycan biosy   | THYM | -0.484213219 |
| UCK1 | Myc_targets_v1              | THYM | 0.340668367  |
| UCK1 | Myeloid cell                | THYM | -0.160462724 |
| UCK1 | N-glycan biosynthesis       | THYM | 0.05121688   |
| UCK1 | Naive b cell                | THYM | 0.011513459  |
| UCK1 | Naive cd4+ t cell           | THYM | 0.074458904  |
| UCK1 | Naive cd8+ t cell           | THYM | 0.115518056  |
| UCK1 | Natural killer cell         | THYM | 0.120485064  |
| UCK1 | Natural killer t (nkt) cell | THYM | 0.137100687  |
| UCK1 | Natural regulatory t (treg) | THYM | 0.110545835  |
| UCK1 | Neomycin, kanamycin and     | THYM | 0.368312605  |
| UCK1 | Neutrophil                  | THYM | -0.218988667 |
| UCK1 | Nicotinate and nicotinami   | THYM | 0.015959526  |
| UCK1 | Nitrogen metabolism         | THYM | 0.251430294  |
| UCK1 | Nod_like_receptor_signal    | THYM | -0.46320593  |
| UCK1 | Notch_signaling             | THYM | -0.220562072 |
| UCK1 | One carbon pool by folate   | THYM | 0.240791927  |
| UCK1 | Other glycan degradation    | THYM | -0.09372225  |
| UCK1 | Other types of o-glycan b   | THYM | 0.299468017  |
| UCK1 | Oxidative phosphorylatior   | THYM | 0.630672418  |
| UCK1 | P53_pathway                 | THYM | -0.002381514 |
| UCK1 | P53_signaling_pathway       | THYM | -0.275127273 |
| UCK1 | Pantothenate and coa bios   | THYM | 0.060147544  |

|      |                            |      |              |
|------|----------------------------|------|--------------|
| UCK1 | Pentose and glucuronate i  | THYM | 0.436978555  |
| UCK1 | Pentose phosphate pathwa   | THYM | 0.428161538  |
| UCK1 | Pericyte                   | THYM | -0.208187882 |
| UCK1 | Phenylalanine metabolism   | THYM | 0.485815076  |
| UCK1 | Phenylalanine, tyrosine ar | THYM | 0.325125801  |
| UCK1 | Phosphonate and phosphir   | THYM | 0.073081806  |
| UCK1 | Pi3k_akt_activation        | THYM | -0.265898228 |
| UCK1 | Pi3k_akt_mtor_signaling    | THYM | 0.112791536  |
| UCK1 | Porphyrin and chlorophyl   | THYM | 0.374977129  |
| UCK1 | Primary bile acid biosynt  | THYM | 0.372304315  |
| UCK1 | Propanoate metabolism      | THYM | -0.03571022  |
| UCK1 | Purine metabolism          | THYM | 0.445872248  |
| UCK1 | Pyrimidine metabolism      | THYM | 0.422791414  |
| UCK1 | Pyruvate metabolism        | THYM | 0.340786754  |
| UCK1 | Regulation_of_autophagy    | THYM | 0.188904463  |
| UCK1 | Retinol metabolism         | THYM | 0.327562322  |
| UCK1 | Riboflavin metabolism      | THYM | 0.492065234  |
| UCK1 | Schmahl_pdgf_signaling     | THYM | -0.567943811 |
| UCK1 | Selenocompound metabol     | THYM | -0.537363903 |
| UCK1 | Signaling_by_hippo         | THYM | -0.468462472 |
| UCK1 | Sphingolipid metabolism    | THYM | -0.314953373 |
| UCK1 | Starch and sucrose metabo  | THYM | 0.58295886   |
| UCK1 | Steroid biosynthesis       | THYM | 0.235694127  |
| UCK1 | Steroid hormone biosynth   | THYM | 0.403736097  |
| UCK1 | Sulfur metabolism          | THYM | -0.088941842 |
| UCK1 | Synthesis and degradation  | THYM | 0.427763019  |
| UCK1 | T helper cell              | THYM | 0.127073197  |
| UCK1 | T helper1 (th1) cell       | THYM | 0.045700952  |
| UCK1 | T helper17 (th17) cell     | THYM | -0.111789656 |
| UCK1 | T helper2 (th2) cell       | THYM | 0.173078076  |
| UCK1 | T helper9 (th9) cell       | THYM | 0.310126752  |
| UCK1 | Taurine and hypotaurine r  | THYM | -0.026727042 |
| UCK1 | Terpenoid backbone biosy   | THYM | 0.482995649  |
| UCK1 | Tgf_beta_signaling_pathw   | THYM | -0.476316422 |
| UCK1 | Thiamine metabolism        | THYM | 0.560829317  |
| UCK1 | Tnfa_signaling_via_nfb     | THYM | -0.482717029 |
| UCK1 | Tryptophan metabolism      | THYM | 0.235963987  |
| UCK1 | Tumor endothelial cell     | THYM | 0.126386757  |
| UCK1 | Tyrosine metabolism        | THYM | 0.546062329  |
| UCK1 | Ubiquinone and other ter   | THYM | 0.382375259  |
| UCK1 | Valine, leucine and isoleu | THYM | 0.179557154  |
| UCK1 | Valine, leucine and isoleu | THYM | 0.129926866  |
| UCK1 | Vascular endothelial cell  | THYM | -0.274211466 |



|      |                            |      |              |
|------|----------------------------|------|--------------|
| UCK1 | Vascular smooth muscle c   | THYM | -0.303548177 |
| UCK1 | Vegf_signaling_pathway     | THYM | 0.032842481  |
| UCK1 | Vitamin b6 metabolism      | THYM | 0.20596165   |
| UCK1 | Willert_wnt_signaling      | THYM | -0.128115755 |
| UCK1 | Wnt_beta_catenin_signali   | THYM | -0.302251224 |
| UCK2 | Abnormal plasma cell       | THYM | 0.359407483  |
| UCK2 | Activated b cell           | THYM | 0.496628411  |
| UCK2 | Activated cd4+ t cell      | THYM | 0.363175762  |
| UCK2 | Activated t cell           | THYM | 0.629049761  |
| UCK2 | Alanine, aspartate and glu | THYM | 0.471351701  |
| UCK2 | Alcala_apoptosis           | THYM | 0.731186875  |
| UCK2 | Alpha-linolenic acid meta  | THYM | 0.232246219  |
| UCK2 | Amino sugar and nucleoti   | THYM | 0.425431322  |
| UCK2 | Ampk_pathway               | THYM | 0.627201475  |
| UCK2 | Angiogenesis               | THYM | -0.57889437  |
| UCK2 | Arachidonic acid metabol   | THYM | 0.220598488  |
| UCK2 | Arginine and proline metε  | THYM | 0.091367112  |
| UCK2 | Arginine biosynthesis      | THYM | 0.17730442   |
| UCK2 | Ascorbate and aldarate mε  | THYM | 0.046677501  |
| UCK2 | Atypical memory b cell     | THYM | 0.544124456  |
| UCK2 | Axl+siglec6+ dendritic ce  | THYM | -0.000276211 |
| UCK2 | B cell                     | THYM | 0.314672584  |
| UCK2 | B1 cell                    | THYM | 0.703257584  |
| UCK2 | Basal cell                 | THYM | -0.193654917 |
| UCK2 | Beta-alanine metabolism    | THYM | -0.187153343 |
| UCK2 | Biosynthesis of unsaturate | THYM | 0.508288001  |
| UCK2 | Biotin metabolism          | THYM | -0.070955506 |
| UCK2 | Butanoate metabolism       | THYM | 0.654499393  |
| UCK2 | Caffeine metabolism        | THYM | 0.376937302  |
| UCK2 | Cancer stem cell           | THYM | -0.424019723 |
| UCK2 | Cancer stem-like cell      | THYM | -0.29101055  |
| UCK2 | Cd4+ cytotoxic t cell      | THYM | 0.084359308  |
| UCK2 | Cd4+ memory t cell         | THYM | 0.487220339  |
| UCK2 | Cd4+ regulatory t cell     | THYM | 0.264778835  |
| UCK2 | Cd4+ t helper cell         | THYM | 0.531522156  |
| UCK2 | Cd4+cd25+ regulatory t c   | THYM | 0.543785418  |
| UCK2 | Cd8+ cytotoxic t cell      | THYM | 0.633049021  |
| UCK2 | Cd8+ regulatory t cell     | THYM | 0.562213019  |
| UCK2 | Cell_cycle                 | THYM | 0.647985874  |
| UCK2 | Chandran_metastasis_top5   | THYM | 0.012884781  |
| UCK2 | Citrate cycle (tca cycle)  | THYM | 0.618244714  |
| UCK2 | Cysteine and methionine r  | THYM | 0.650131489  |
| UCK2 | Cytokine induced killer cε | THYM | 0.592579166  |

|      |                              |      |              |
|------|------------------------------|------|--------------|
| UCK2 | D-arginine and d-ornithin    | THYM | 0.218125601  |
| UCK2 | D-glutamine and d-glutan     | THYM | -0.226237642 |
| UCK2 | Dendritic cell               | THYM | 0.076369283  |
| UCK2 | Dna_repair                   | THYM | 0.636425064  |
| UCK2 | Dna_replication              | THYM | 0.833396774  |
| UCK2 | Double-negative memory       | THYM | 0.429012735  |
| UCK2 | Drug metabolism - cytoch     | THYM | 0.193269076  |
| UCK2 | Drug metabolism - other      | THYM | 0.599445661  |
| UCK2 | E2f_targets                  | THYM | 0.753149166  |
| UCK2 | Ecm_receptor_interaction     | THYM | -0.634162665 |
| UCK2 | Effector cd4+ memory t       | THYM | 0.392792732  |
| UCK2 | Effector cd8+ memory t       | THYM | 0.161094812  |
| UCK2 | Effector memory t cell       | THYM | 0.545684795  |
| UCK2 | Effector regulatory t (treg  | THYM | 0.414544892  |
| UCK2 | Elvidge_hif1a_targets_up     | THYM | 0.67683959   |
| UCK2 | Endothelial cell             | THYM | -0.316796811 |
| UCK2 | Eosinophil                   | THYM | 0.285588974  |
| UCK2 | Ether lipid metabolism       | THYM | -0.012905714 |
| UCK2 | Exhausted cd4+ t cell        | THYM | 0.395972214  |
| UCK2 | Exhausted cd8+ t cell        | THYM | 0.188576496  |
| UCK2 | Exhausted t cell             | THYM | 0.584160607  |
| UCK2 | Fat cell (adipocyte)         | THYM | -0.271950795 |
| UCK2 | Fatty acid biosynthesis      | THYM | 0.031793074  |
| UCK2 | Fatty acid degradation       | THYM | 0.017245465  |
| UCK2 | Fatty acid elongation        | THYM | 0.434666434  |
| UCK2 | Fibroblast                   | THYM | -0.400451555 |
| UCK2 | Folate biosynthesis          | THYM | 0.521511447  |
| UCK2 | Follicular b cell            | THYM | 0.342535954  |
| UCK2 | Follicular dendritic cell    | THYM | 0.333690809  |
| UCK2 | Follicular helper (tfh) t ce | THYM | 0.627802383  |
| UCK2 | Follicular t cell            | THYM | 0.614808463  |
| UCK2 | Foxp3+il-17+ t cell          | THYM | -0.079137806 |
| UCK2 | Fructose and mannose me      | THYM | 0.488390653  |
| UCK2 | G2m_checkpoint               | THYM | 0.669016857  |
| UCK2 | Galactose metabolism         | THYM | 0.499319169  |
| UCK2 | Galie_tumor_stemness_ge      | THYM | -0.576769281 |
| UCK2 | Glutathione metabolism       | THYM | 0.408738414  |
| UCK2 | Glycerolipid metabolism      | THYM | 0.521907875  |
| UCK2 | Glycerophospholipid metæ     | THYM | -0.017255177 |
| UCK2 | Glycine, serine and threor   | THYM | 0.347747614  |
| UCK2 | Glycolysis / gluconeogene    | THYM | 0.436241169  |
| UCK2 | Glycosaminoglycan biosy      | THYM | -0.469730558 |
| UCK2 | Glycosaminoglycan biosy      | THYM | -0.547095837 |

|      |                           |      |              |
|------|---------------------------|------|--------------|
| UCK2 | Glycosaminoglycan biosyn  | THYM | 0.096361891  |
| UCK2 | Glycosaminoglycan degra   | THYM | -0.687754934 |
| UCK2 | Glycosphingolipid biosyn  | THYM | -0.499648488 |
| UCK2 | Glycosphingolipid biosyn  | THYM | -0.588898986 |
| UCK2 | Glycosphingolipid biosyn  | THYM | -0.452831008 |
| UCK2 | Glycosylphosphatidylinos  | THYM | 0.11470331   |
| UCK2 | Glyoxylate and dicarboxy  | THYM | 0.605887371  |
| UCK2 | Granulocyte               | THYM | 0.037495127  |
| UCK2 | Hedgehog_signaling        | THYM | -0.678660714 |
| UCK2 | Histidine metabolism      | THYM | -0.358353031 |
| UCK2 | Hypoxia                   | THYM | -0.022286447 |
| UCK2 | Il-17alpha t cell         | THYM | 0.560427407  |
| UCK2 | Il2_stat5_signaling       | THYM | -0.10435082  |
| UCK2 | Il6_jak_stat3_signaling   | THYM | -0.153914082 |
| UCK2 | Immune_checkpoints_tur    | THYM | 0.145967447  |
| UCK2 | Immune_inhibition_cytok   | THYM | 0.088834557  |
| UCK2 | Inositol phosphate metabo | THYM | -0.161724359 |
| UCK2 | Interleukin_6_signaling   | THYM | -0.394545102 |
| UCK2 | Jaeger_metastasis_up      | THYM | 0.589210624  |
| UCK2 | Jain_nfkb_signaling       | THYM | 0.773560237  |
| UCK2 | Kras_signaling_up         | THYM | -0.130860282 |
| UCK2 | Linoleic acid metabolism  | THYM | 0.27970892   |
| UCK2 | Lipoic acid metabolism    | THYM | -0.078141518 |
| UCK2 | Lysine degradation        | THYM | 0.080126683  |
| UCK2 | Lysosome                  | THYM | -0.453374528 |
| UCK2 | M1 macrophage             | THYM | -0.197751489 |
| UCK2 | M2 macrophage             | THYM | -0.085809282 |
| UCK2 | Mannose type o-glycan bi  | THYM | -0.466144536 |
| UCK2 | Mapk_signaling_pathway    | THYM | -0.240341259 |
| UCK2 | Mapk3_erk1_activation     | THYM | -0.307013433 |
| UCK2 | Marginal zone b cell      | THYM | 0.43689133   |
| UCK2 | Memory b cell             | THYM | 0.258498801  |
| UCK2 | Mesenchymal cell          | THYM | -0.444266734 |
| UCK2 | Mesenchymal stem cell     | THYM | -0.358458775 |
| UCK2 | Metabolism of xenobiotic  | THYM | 0.236046192  |
| UCK2 | Migrating cancer stem cel | THYM | -0.5348191   |
| UCK2 | Mitotic_spindle           | THYM | 0.034141339  |
| UCK2 | Monocyte                  | THYM | 0.17082087   |
| UCK2 | Mtor_signaling_pathway    | THYM | -0.093702352 |
| UCK2 | Mtorc1_signaling          | THYM | 0.722713851  |
| UCK2 | Mucin type o-glycan biosy | THYM | -0.354225338 |
| UCK2 | Myc_targets_v1            | THYM | 0.801240711  |
| UCK2 | Myeloid cell              | THYM | 0.245791383  |

|      |                             |      |              |
|------|-----------------------------|------|--------------|
| UCK2 | N-glycan biosynthesis       | THYM | -0.160027831 |
| UCK2 | Naive b cell                | THYM | 0.558484984  |
| UCK2 | Naive cd4+ t cell           | THYM | 0.212375467  |
| UCK2 | Naive cd8+ t cell           | THYM | 0.233530144  |
| UCK2 | Natural killer cell         | THYM | 0.458445343  |
| UCK2 | Natural killer t (nkt) cell | THYM | 0.634275596  |
| UCK2 | Natural regulatory t (treg) | THYM | 0.51759903   |
| UCK2 | Neomycin, kanamycin and     | THYM | 0.511653284  |
| UCK2 | Neutrophil                  | THYM | 0.128099047  |
| UCK2 | Nicotinate and nicotinami   | THYM | 0.433799444  |
| UCK2 | Nitrogen metabolism         | THYM | -0.188462931 |
| UCK2 | Nod_like_receptor_signal    | THYM | -0.161553545 |
| UCK2 | Notch_signaling             | THYM | -0.698469922 |
| UCK2 | One carbon pool by folate   | THYM | 0.800465426  |
| UCK2 | Other glycan degradation    | THYM | -0.581065261 |
| UCK2 | Other types of o-glycan b   | THYM | -0.40337659  |
| UCK2 | Oxidative phosphorylatio    | THYM | 0.648846822  |
| UCK2 | P53_pathway                 | THYM | -0.408826826 |
| UCK2 | P53_signaling_pathway       | THYM | 0.418107462  |
| UCK2 | Pantothenate and coa bios   | THYM | 0.406642982  |
| UCK2 | Pentose and glucuronate i   | THYM | 0.321158813  |
| UCK2 | Pentose phosphate pathwa    | THYM | 0.681761141  |
| UCK2 | Pericyte                    | THYM | -0.329810984 |
| UCK2 | Phenylalanine metabolism    | THYM | 0.277303537  |
| UCK2 | Phenylalanine, tyrosine ar  | THYM | 0.524327056  |
| UCK2 | Phosphonate and phosphir    | THYM | 0.266718257  |
| UCK2 | Pi3k_akt_activation         | THYM | -0.315892027 |
| UCK2 | Pi3k_akt_mtor_signaling     | THYM | 0.647039378  |
| UCK2 | Porphyrin and chlorophyl    | THYM | 0.567706899  |
| UCK2 | Primary bile acid biosynt   | THYM | 0.185941653  |
| UCK2 | Propanoate metabolism       | THYM | 0.136545246  |
| UCK2 | Purine metabolism           | THYM | 0.831131869  |
| UCK2 | Pyrimidine metabolism       | THYM | 0.793580704  |
| UCK2 | Pyruvate metabolism         | THYM | 0.373170177  |
| UCK2 | Regulation_of_autophagy     | THYM | 0.477471442  |
| UCK2 | Retinol metabolism          | THYM | 0.326734901  |
| UCK2 | Riboflavin metabolism       | THYM | 0.419271603  |
| UCK2 | Schmahl_pdgf_signaling      | THYM | -0.579039281 |
| UCK2 | Selenocompound metabol      | THYM | 0.222608024  |
| UCK2 | Signaling_by_hippo          | THYM | -0.727044596 |
| UCK2 | Sphingolipid metabolism     | THYM | -0.384979949 |
| UCK2 | Starch and sucrose metabo   | THYM | 0.371301735  |
| UCK2 | Steroid biosynthesis        | THYM | 0.283044727  |

|       |                            |      |              |
|-------|----------------------------|------|--------------|
| UCK2  | Steroid hormone biosynth   | THYM | 0.383747021  |
| UCK2  | Sulfur metabolism          | THYM | 0.034877634  |
| UCK2  | Synthesis and degradation  | THYM | 0.513392823  |
| UCK2  | T helper cell              | THYM | 0.535576451  |
| UCK2  | T helper1 (th1) cell       | THYM | 0.318336688  |
| UCK2  | T helper17 (th17) cell     | THYM | 0.353248865  |
| UCK2  | T helper2 (th2) cell       | THYM | 0.472735828  |
| UCK2  | T helper9 (th9) cell       | THYM | 0.568693505  |
| UCK2  | Taurine and hypotaurine r  | THYM | -0.230956869 |
| UCK2  | Terpenoid backbone biosy   | THYM | 0.631844416  |
| UCK2  | Tgf_beta_signaling_pathw   | THYM | -0.794751118 |
| UCK2  | Thiamine metabolism        | THYM | 0.307635758  |
| UCK2  | Tnfa_signaling_via_nfkb    | THYM | -0.173034359 |
| UCK2  | Tryptophan metabolism      | THYM | 0.089791891  |
| UCK2  | Tumor endothelial cell     | THYM | 0.171885453  |
| UCK2  | Tyrosine metabolism        | THYM | -0.010033727 |
| UCK2  | Ubiquinone and other terq  | THYM | 0.251986164  |
| UCK2  | Valine, leucine and isoleu | THYM | 0.415765309  |
| UCK2  | Valine, leucine and isoleu | THYM | 0.291589594  |
| UCK2  | Vascular endothelial cell  | THYM | -0.531820275 |
| UCK2  | Vascular smooth muscle c   | THYM | -0.121314663 |
| UCK2  | Vegf_signaling_pathway     | THYM | 0.258557878  |
| UCK2  | Vitamin b6 metabolism      | THYM | 0.088452357  |
| UCK2  | Willert_wnt_signaling      | THYM | 0.209329006  |
| UCK2  | Wnt_beta_catenin_signali   | THYM | -0.713901087 |
| UCKL1 | Abnormal plasma cell       | THYM | 0.291882082  |
| UCKL1 | Activated b cell           | THYM | 0.380785818  |
| UCKL1 | Activated cd4+ t cell      | THYM | 0.112790321  |
| UCKL1 | Activated t cell           | THYM | 0.355085856  |
| UCKL1 | Alanine, aspartate and glu | THYM | 0.381589595  |
| UCKL1 | Alcala_apoptosis           | THYM | 0.56545567   |
| UCKL1 | Alpha-linolenic acid meta  | THYM | 0.456136157  |
| UCKL1 | Amino sugar and nucleoti   | THYM | 0.575405895  |
| UCKL1 | Ampk_pathway               | THYM | 0.223433886  |
| UCKL1 | Angiogenesis               | THYM | -0.263419226 |
| UCKL1 | Arachidonic acid metabol:  | THYM | 0.473526489  |
| UCKL1 | Arginine and proline metæ  | THYM | 0.385299757  |
| UCKL1 | Arginine biosynthesis      | THYM | 0.279445879  |
| UCKL1 | Ascorbate and aldarate mc  | THYM | 0.315328457  |
| UCKL1 | Atypical memory b cell     | THYM | 0.309857158  |
| UCKL1 | Axl+siglec6+ dendritic ce  | THYM | 0.064314825  |
| UCKL1 | B cell                     | THYM | 0.168402683  |
| UCKL1 | B1 cell                    | THYM | 0.396820644  |

|       |                             |      |              |
|-------|-----------------------------|------|--------------|
| UCKL1 | Basal cell                  | THYM | 0.049050333  |
| UCKL1 | Beta-alanine metabolism     | THYM | 0.090637873  |
| UCKL1 | Biosynthesis of unsaturate  | THYM | 0.476626611  |
| UCKL1 | Biotin metabolism           | THYM | 0.055208044  |
| UCKL1 | Butanoate metabolism        | THYM | 0.57314666   |
| UCKL1 | Caffeine metabolism         | THYM | 0.188585549  |
| UCKL1 | Cancer stem cell            | THYM | -0.357830557 |
| UCKL1 | Cancer stem-like cell       | THYM | -0.184765199 |
| UCKL1 | Cd4+ cytotoxic t cell       | THYM | 0.160265028  |
| UCKL1 | Cd4+ memory t cell          | THYM | 0.357817427  |
| UCKL1 | Cd4+ regulatory t cell      | THYM | 0.119247919  |
| UCKL1 | Cd4+ t helper cell          | THYM | 0.208730502  |
| UCKL1 | Cd4+cd25+ regulatory t c    | THYM | 0.221443337  |
| UCKL1 | Cd8+ cytotoxic t cell       | THYM | 0.397739613  |
| UCKL1 | Cd8+ regulatory t cell      | THYM | 0.224083099  |
| UCKL1 | Cell_cycle                  | THYM | 0.110627356  |
| UCKL1 | Chandran_metastasis_top5    | THYM | -0.418270613 |
| UCKL1 | Citrate cycle (tca cycle)   | THYM | 0.405471455  |
| UCKL1 | Cysteine and methionine r   | THYM | 0.373543753  |
| UCKL1 | Cytokine induced killer c   | THYM | 0.306699527  |
| UCKL1 | D-arginine and d-ornithin   | THYM | 0.275650141  |
| UCKL1 | D-glutamine and d-glutan    | THYM | -0.290174788 |
| UCKL1 | Dendritic cell              | THYM | 0.081987488  |
| UCKL1 | Dna_repair                  | THYM | 0.569345444  |
| UCKL1 | Dna_replication             | THYM | 0.459702559  |
| UCKL1 | Double-negative memory      | THYM | 0.490140552  |
| UCKL1 | Drug metabolism - cytoch    | THYM | 0.438207437  |
| UCKL1 | Drug metabolism - other     | THYM | 0.712161625  |
| UCKL1 | E2f_targets                 | THYM | 0.316504369  |
| UCKL1 | Ecm_receptor_interaction    | THYM | -0.405663141 |
| UCKL1 | Effector cd4+ memory t (    | THYM | 0.131552235  |
| UCKL1 | Effector cd8+ memory t (    | THYM | -0.02221634  |
| UCKL1 | Effector memory t cell      | THYM | 0.21760065   |
| UCKL1 | Effector regulatory t (treg | THYM | 0.04045111   |
| UCKL1 | Elvidge_hif1a_targets_up    | THYM | 0.261826691  |
| UCKL1 | Endothelial cell            | THYM | -0.378200753 |
| UCKL1 | Eosinophil                  | THYM | 0.223736962  |
| UCKL1 | Ether lipid metabolism      | THYM | 0.205888813  |
| UCKL1 | Exhausted cd4+ t cell       | THYM | 0.069486161  |
| UCKL1 | Exhausted cd8+ t cell       | THYM | -0.041990365 |
| UCKL1 | Exhausted t cell            | THYM | 0.348197545  |
| UCKL1 | Fat cell (adipocyte)        | THYM | 0.059719495  |
| UCKL1 | Fatty acid biosynthesis     | THYM | 0.173709965  |

|       |                              |      |              |
|-------|------------------------------|------|--------------|
| UCKL1 | Fatty acid degradation       | THYM | 0.076305447  |
| UCKL1 | Fatty acid elongation        | THYM | 0.477237945  |
| UCKL1 | Fibroblast                   | THYM | -0.290684387 |
| UCKL1 | Folate biosynthesis          | THYM | 0.534305837  |
| UCKL1 | Follicular b cell            | THYM | 0.229843673  |
| UCKL1 | Follicular dendritic cell    | THYM | 0.243795559  |
| UCKL1 | Follicular helper (tfh) t ce | THYM | 0.30390222   |
| UCKL1 | Follicular t cell            | THYM | 0.477900247  |
| UCKL1 | Foxp3+il-17+ t cell          | THYM | -0.109070755 |
| UCKL1 | Fructose and mannose me      | THYM | 0.668418558  |
| UCKL1 | G2m_checkpoint               | THYM | 0.154563447  |
| UCKL1 | Galactose metabolism         | THYM | 0.656866441  |
| UCKL1 | Galie_tumor_stemness_ge      | THYM | -0.426135508 |
| UCKL1 | Glutathione metabolism       | THYM | 0.607759915  |
| UCKL1 | Glycerolipid metabolism      | THYM | 0.620472306  |
| UCKL1 | Glycerophospholipid metæ     | THYM | 0.426434136  |
| UCKL1 | Glycine, serine and threor   | THYM | 0.542575305  |
| UCKL1 | Glycolysis / gluconeogene    | THYM | 0.510169846  |
| UCKL1 | Glycosaminoglycan biosy      | THYM | -0.061592989 |
| UCKL1 | Glycosaminoglycan biosy      | THYM | -0.171359412 |
| UCKL1 | Glycosaminoglycan biosy      | THYM | 0.075665878  |
| UCKL1 | Glycosaminoglycan degra      | THYM | -0.158500515 |
| UCKL1 | Glycosphingolipid biosyn     | THYM | 0.012614308  |
| UCKL1 | Glycosphingolipid biosyn     | THYM | -0.050891373 |
| UCKL1 | Glycosphingolipid biosyn     | THYM | 0.027531646  |
| UCKL1 | Glycosylphosphatidylinos     | THYM | 0.397747181  |
| UCKL1 | Glyoxylate and dicarboxy     | THYM | 0.53685463   |
| UCKL1 | Granulocyte                  | THYM | -0.00087575  |
| UCKL1 | Hedgehog_signaling           | THYM | -0.606903563 |
| UCKL1 | Histidine metabolism         | THYM | -0.081127229 |
| UCKL1 | Hypoxia                      | THYM | 0.142685064  |
| UCKL1 | Il-17ralpha t cell           | THYM | 0.211847401  |
| UCKL1 | Il2_stat5_signaling          | THYM | 0.011691873  |
| UCKL1 | Il6_jak_stat3_signaling      | THYM | -0.160671369 |
| UCKL1 | Immune_checkpoints_tur       | THYM | 0.295291108  |
| UCKL1 | Immune_inhibition_cytok      | THYM | 0.286784081  |
| UCKL1 | Inositol phosphate metabo    | THYM | -0.464370295 |
| UCKL1 | Interleukin_6_signaling      | THYM | -0.615016837 |
| UCKL1 | Jaeger_metastasis_up         | THYM | 0.236120418  |
| UCKL1 | Jain_nfkb_signaling          | THYM | 0.40088636   |
| UCKL1 | Kras_signaling_up            | THYM | -0.220585374 |
| UCKL1 | Linoleic acid metabolism     | THYM | 0.369883368  |
| UCKL1 | Lipoic acid metabolism       | THYM | 0.048191928  |

|       |                             |      |              |
|-------|-----------------------------|------|--------------|
| UCKL1 | Lysine degradation          | THYM | -0.148931317 |
| UCKL1 | Lysosome                    | THYM | 0.059010632  |
| UCKL1 | M1 macrophage               | THYM | -0.172101943 |
| UCKL1 | M2 macrophage               | THYM | 0.06042859   |
| UCKL1 | Mannose type o-glycan bi    | THYM | -0.032843334 |
| UCKL1 | Mapk_signaling_pathway      | THYM | -0.339837305 |
| UCKL1 | Mapk3_erk1_activation       | THYM | -0.632839949 |
| UCKL1 | Marginal zone b cell        | THYM | 0.146659922  |
| UCKL1 | Memory b cell               | THYM | 0.311602091  |
| UCKL1 | Mesenchymal cell            | THYM | -0.231465036 |
| UCKL1 | Mesenchymal stem cell       | THYM | -0.33843404  |
| UCKL1 | Metabolism of xenobiotic    | THYM | 0.536996021  |
| UCKL1 | Migrating cancer stem cel   | THYM | -0.287808011 |
| UCKL1 | Mitotic_spindle             | THYM | -0.41401022  |
| UCKL1 | Monocyte                    | THYM | 0.139804044  |
| UCKL1 | Mtor_signaling_pathway      | THYM | -0.32953378  |
| UCKL1 | Mtorc1_signaling            | THYM | 0.462683567  |
| UCKL1 | Mucin type o-glycan biosy   | THYM | -0.511778507 |
| UCKL1 | Myc_targets_v1              | THYM | 0.52897767   |
| UCKL1 | Myeloid cell                | THYM | 0.069111656  |
| UCKL1 | N-glycan biosynthesis       | THYM | 0.209466883  |
| UCKL1 | Naive b cell                | THYM | 0.434376364  |
| UCKL1 | Naive cd4+ t cell           | THYM | -0.049272202 |
| UCKL1 | Naive cd8+ t cell           | THYM | -0.021896363 |
| UCKL1 | Natural killer cell         | THYM | 0.272174602  |
| UCKL1 | Natural killer t (nkt) cell | THYM | 0.242351919  |
| UCKL1 | Natural regulatory t (treg) | THYM | 0.143988373  |
| UCKL1 | Neomycin, kanamycin and     | THYM | 0.480681918  |
| UCKL1 | Neutrophil                  | THYM | 0.163582211  |
| UCKL1 | Nicotinate and nicotinami   | THYM | 0.271967732  |
| UCKL1 | Nitrogen metabolism         | THYM | -0.048975358 |
| UCKL1 | Nod_like_receptor_signal    | THYM | -0.155056349 |
| UCKL1 | Notch_signaling             | THYM | -0.354962926 |
| UCKL1 | One carbon pool by folate   | THYM | 0.410813688  |
| UCKL1 | Other glycan degradation    | THYM | -0.116581254 |
| UCKL1 | Other types of o-glycan b   | THYM | 0.131765316  |
| UCKL1 | Oxidative phosphorylatio    | THYM | 0.66388629   |
| UCKL1 | P53_pathway                 | THYM | 0.009910324  |
| UCKL1 | P53_signaling_pathway       | THYM | -0.137886529 |
| UCKL1 | Pantothenate and coa bios   | THYM | 0.228449047  |
| UCKL1 | Pentose and glucuronate i   | THYM | 0.575049445  |
| UCKL1 | Pentose phosphate pathwa    | THYM | 0.671334761  |
| UCKL1 | Pericyte                    | THYM | -0.189413268 |



|       |                            |      |              |
|-------|----------------------------|------|--------------|
| UCKL1 | Phenylalanine metabolism   | THYM | 0.586321313  |
| UCKL1 | Phenylalanine, tyrosine ar | THYM | 0.427332505  |
| UCKL1 | Phosphonate and phosphir   | THYM | 0.258667533  |
| UCKL1 | Pi3k_akt_activation        | THYM | -0.498312788 |
| UCKL1 | Pi3k_akt_mtor_signaling    | THYM | 0.227111095  |
| UCKL1 | Porphyrin and chlorophyl   | THYM | 0.669980668  |
| UCKL1 | Primary bile acid biosynt  | THYM | 0.245711885  |
| UCKL1 | Propanoate metabolism      | THYM | 0.042399996  |
| UCKL1 | Purine metabolism          | THYM | 0.65933572   |
| UCKL1 | Pyrimidine metabolism      | THYM | 0.656852454  |
| UCKL1 | Pyruvate metabolism        | THYM | 0.381333775  |
| UCKL1 | Regulation_of_autophagy    | THYM | 0.337273568  |
| UCKL1 | Retinol metabolism         | THYM | 0.585539791  |
| UCKL1 | Riboflavin metabolism      | THYM | 0.498492568  |
| UCKL1 | Schmahl_pdgf_signaling     | THYM | -0.476119816 |
| UCKL1 | Selenocompound metabol     | THYM | -0.032269245 |
| UCKL1 | Signaling_by_hippo         | THYM | -0.668977173 |
| UCKL1 | Sphingolipid metabolism    | THYM | -0.272655092 |
| UCKL1 | Starch and sucrose metabo  | THYM | 0.41927193   |
| UCKL1 | Steroid biosynthesis       | THYM | 0.559143092  |
| UCKL1 | Steroid hormone biosynth   | THYM | 0.540672705  |
| UCKL1 | Sulfur metabolism          | THYM | 0.113159408  |
| UCKL1 | Synthesis and degradation  | THYM | 0.439144359  |
| UCKL1 | T helper cell              | THYM | 0.255592562  |
| UCKL1 | T helper1 (th1) cell       | THYM | 0.220512736  |
| UCKL1 | T helper17 (th17) cell     | THYM | 0.112323384  |
| UCKL1 | T helper2 (th2) cell       | THYM | 0.261179748  |
| UCKL1 | T helper9 (th9) cell       | THYM | 0.297808365  |
| UCKL1 | Taurine and hypotaurine r  | THYM | 0.165409344  |
| UCKL1 | Terpenoid backbone biosy   | THYM | 0.65441581   |
| UCKL1 | Tgf_beta_signaling_pathw   | THYM | -0.607718022 |
| UCKL1 | Thiamine metabolism        | THYM | 0.575137111  |
| UCKL1 | Tnfa_signaling_via_nfkb    | THYM | -0.121609534 |
| UCKL1 | Tryptophan metabolism      | THYM | 0.261171197  |
| UCKL1 | Tumor endothelial cell     | THYM | 0.246697841  |
| UCKL1 | Tyrosine metabolism        | THYM | 0.451240709  |
| UCKL1 | Ubiquinone and other ter   | THYM | 0.489843928  |
| UCKL1 | Valine, leucine and isoleu | THYM | 0.499868851  |
| UCKL1 | Valine, leucine and isoleu | THYM | 0.198146655  |
| UCKL1 | Vascular endothelial cell  | THYM | -0.201426869 |
| UCKL1 | Vascular smooth muscle c   | THYM | -0.009066172 |
| UCKL1 | Vegf_signaling_pathway     | THYM | 0.141329981  |
| UCKL1 | Vitamin b6 metabolism      | THYM | 0.152638645  |

|       |                            |      |              |
|-------|----------------------------|------|--------------|
| UCKL1 | Willert_wnt_signaling      | THYM | 0.168616421  |
| UCKL1 | Wnt_beta_catenin_signali   | THYM | -0.476700382 |
| UPP1  | Abnormal plasma cell       | THYM | -0.043102365 |
| UPP1  | Activated b cell           | THYM | 0.104174703  |
| UPP1  | Activated cd4+ t cell      | THYM | -0.095925845 |
| UPP1  | Activated t cell           | THYM | -0.214539368 |
| UPP1  | Alanine, aspartate and glu | THYM | 0.273527385  |
| UPP1  | Alcala_apoptosis           | THYM | -0.12851829  |
| UPP1  | Alpha-linolenic acid meta  | THYM | 0.58942116   |
| UPP1  | Amino sugar and nucleoti   | THYM | 0.391516329  |
| UPP1  | Ampk_pathway               | THYM | -0.52418315  |
| UPP1  | Angiogenesis               | THYM | 0.606993514  |
| UPP1  | Arachidonic acid metabol   | THYM | 0.664550747  |
| UPP1  | Arginine and proline metæ  | THYM | 0.502984448  |
| UPP1  | Arginine biosynthesis      | THYM | 0.410483463  |
| UPP1  | Ascorbate and aldarate me  | THYM | 0.471867811  |
| UPP1  | Atypical memory b cell     | THYM | -0.190925821 |
| UPP1  | Axl+siglec6+ dendritic ce  | THYM | 0.409339836  |
| UPP1  | B cell                     | THYM | 0.094697039  |
| UPP1  | B1 cell                    | THYM | -0.254281031 |
| UPP1  | Basal cell                 | THYM | 0.54444144   |
| UPP1  | Beta-alanine metabolism    | THYM | 0.320481506  |
| UPP1  | Biosynthesis of unsaturate | THYM | -0.047337956 |
| UPP1  | Biotin metabolism          | THYM | 0.2846072    |
| UPP1  | Butanoate metabolism       | THYM | -0.067840377 |
| UPP1  | Caffeine metabolism        | THYM | 0.133734989  |
| UPP1  | Cancer stem cell           | THYM | 0.41323921   |
| UPP1  | Cancer stem-like cell      | THYM | 0.433727809  |
| UPP1  | Cd4+ cytotoxic t cell      | THYM | 0.470176782  |
| UPP1  | Cd4+ memory t cell         | THYM | 0.013236959  |
| UPP1  | Cd4+ regulatory t cell     | THYM | 0.039944632  |
| UPP1  | Cd4+ t helper cell         | THYM | -0.436308826 |
| UPP1  | Cd4+cd25+ regulatory t c   | THYM | -0.4110133   |
| UPP1  | Cd8+ cytotoxic t cell      | THYM | -0.058188195 |
| UPP1  | Cd8+ regulatory t cell     | THYM | -0.322361801 |
| UPP1  | Cell_cycle                 | THYM | -0.544051026 |
| UPP1  | Chandran_metastasis_topç   | THYM | -0.387753752 |
| UPP1  | Citrate cycle (tca cycle)  | THYM | -0.184400436 |
| UPP1  | Cysteine and methionine r  | THYM | 0.040426926  |
| UPP1  | Cytokine induced killer cæ | THYM | -0.371041683 |
| UPP1  | D-arginine and d-ornithin  | THYM | 0.290081345  |
| UPP1  | D-glutamine and d-glutan   | THYM | 0.06446675   |
| UPP1  | Dendritic cell             | THYM | 0.21604873   |

|      |                              |      |              |
|------|------------------------------|------|--------------|
| UPP1 | Dna_repair                   | THYM | -0.167855145 |
| UPP1 | Dna_replication              | THYM | -0.333711882 |
| UPP1 | Double-negative memory       | THYM | 0.265870652  |
| UPP1 | Drug metabolism - cytoch     | THYM | 0.45516301   |
| UPP1 | Drug metabolism - other      | THYM | 0.278159813  |
| UPP1 | E2f_targets                  | THYM | -0.44941526  |
| UPP1 | Ecm_receptor_interaction     | THYM | 0.419017125  |
| UPP1 | Effector cd4+ memory t (     | THYM | -0.291892104 |
| UPP1 | Effector cd8+ memory t (     | THYM | 0.13196379   |
| UPP1 | Effector memory t cell       | THYM | -0.242150881 |
| UPP1 | Effector regulatory t (treg  | THYM | -0.462312307 |
| UPP1 | Elvidge_hif1a_targets_up     | THYM | -0.248810512 |
| UPP1 | Endothelial cell             | THYM | -0.008301055 |
| UPP1 | Eosinophil                   | THYM | 0.276949902  |
| UPP1 | Ether lipid metabolism       | THYM | 0.50211278   |
| UPP1 | Exhausted cd4+ t cell        | THYM | -0.021508045 |
| UPP1 | Exhausted cd8+ t cell        | THYM | 0.160014573  |
| UPP1 | Exhausted t cell             | THYM | -0.146351986 |
| UPP1 | Fat cell (adipocyte)         | THYM | 0.133064082  |
| UPP1 | Fatty acid biosynthesis      | THYM | -0.01179264  |
| UPP1 | Fatty acid degradation       | THYM | 0.058190511  |
| UPP1 | Fatty acid elongation        | THYM | 0.048182504  |
| UPP1 | Fibroblast                   | THYM | 0.387001809  |
| UPP1 | Folate biosynthesis          | THYM | 0.165505857  |
| UPP1 | Follicular b cell            | THYM | 0.129605672  |
| UPP1 | Follicular dendritic cell    | THYM | 0.182426113  |
| UPP1 | Follicular helper (tfh) t ce | THYM | -0.203164718 |
| UPP1 | Follicular t cell            | THYM | -0.105705041 |
| UPP1 | Foxp3+il-17+ t cell          | THYM | 0.349312766  |
| UPP1 | Fructose and mannose me      | THYM | 0.456496221  |
| UPP1 | G2m_checkpoint               | THYM | -0.532402811 |
| UPP1 | Galactose metabolism         | THYM | 0.188445105  |
| UPP1 | Galie_tumor_stemness_ge      | THYM | 0.213017653  |
| UPP1 | Glutathione metabolism       | THYM | 0.438107337  |
| UPP1 | Glycerolipid metabolism      | THYM | 0.237145602  |
| UPP1 | Glycerophospholipid metæ     | THYM | 0.525461376  |
| UPP1 | Glycine, serine and threor   | THYM | 0.314871193  |
| UPP1 | Glycolysis / gluconeogene    | THYM | 0.347922387  |
| UPP1 | Glycosaminoglycan biosy1     | THYM | 0.485405913  |
| UPP1 | Glycosaminoglycan biosy1     | THYM | 0.237823387  |
| UPP1 | Glycosaminoglycan biosy1     | THYM | 0.195839188  |
| UPP1 | Glycosaminoglycan degra      | THYM | 0.468871767  |
| UPP1 | Glycosphingolipid biosyn1    | THYM | 0.437069538  |

|      |                           |      |              |
|------|---------------------------|------|--------------|
| UPP1 | Glycosphingolipid biosyn  | THYM | 0.436309324  |
| UPP1 | Glycosphingolipid biosyn  | THYM | 0.598479177  |
| UPP1 | Glycosylphosphatidylinos  | THYM | 0.149267633  |
| UPP1 | Glyoxylate and dicarboxy  | THYM | -0.07288114  |
| UPP1 | Granulocyte               | THYM | 0.335574754  |
| UPP1 | Hedgehog_signaling        | THYM | 0.113153737  |
| UPP1 | Histidine metabolism      | THYM | 0.448785511  |
| UPP1 | Hypoxia                   | THYM | 0.589788501  |
| UPP1 | Il-17alpha t cell         | THYM | -0.434942133 |
| UPP1 | Il2_stat5_signaling       | THYM | 0.600361315  |
| UPP1 | Il6_jak_stat3_signaling   | THYM | 0.416528692  |
| UPP1 | Immune_checkpoints_tur    | THYM | 0.458425994  |
| UPP1 | Immune_inhibition_cytok   | THYM | 0.606435089  |
| UPP1 | Inositol phosphate metabo | THYM | -0.416673823 |
| UPP1 | Interleukin_6_signaling   | THYM | 0.005524045  |
| UPP1 | Jaeger_metastasis_up      | THYM | -0.244838142 |
| UPP1 | Jain_nfkb_signaling       | THYM | -0.300400627 |
| UPP1 | Kras_signaling_up         | THYM | 0.401527943  |
| UPP1 | Linoleic acid metabolism  | THYM | 0.463395431  |
| UPP1 | Lipoic acid metabolism    | THYM | 0.090918879  |
| UPP1 | Lysine degradation        | THYM | -0.442996564 |
| UPP1 | Lysosome                  | THYM | 0.551040328  |
| UPP1 | M1 macrophage             | THYM | 0.442652381  |
| UPP1 | M2 macrophage             | THYM | 0.533523949  |
| UPP1 | Mannose type o-glycan bi  | THYM | 0.39520325   |
| UPP1 | Mapk_signaling_pathway    | THYM | 0.23332155   |
| UPP1 | Mapk3_erk1_activation     | THYM | -0.179605632 |
| UPP1 | Marginal zone b cell      | THYM | -0.339288505 |
| UPP1 | Memory b cell             | THYM | 0.446434658  |
| UPP1 | Mesenchymal cell          | THYM | 0.378860329  |
| UPP1 | Mesenchymal stem cell     | THYM | 0.363795515  |
| UPP1 | Metabolism of xenobiotic  | THYM | 0.513252179  |
| UPP1 | Migrating cancer stem cel | THYM | 0.424725875  |
| UPP1 | Mitotic_spindle           | THYM | -0.595655536 |
| UPP1 | Monocyte                  | THYM | 0.39151294   |
| UPP1 | Mtor_signaling_pathway    | THYM | -0.289029009 |
| UPP1 | Mtorc1_signaling          | THYM | -0.073733752 |
| UPP1 | Mucin type o-glycan biosy | THYM | -0.082115764 |
| UPP1 | Myc_targets_v1            | THYM | -0.256438635 |
| UPP1 | Myeloid cell              | THYM | 0.130775247  |
| UPP1 | N-glycan biosynthesis     | THYM | 0.315874716  |
| UPP1 | Naive b cell              | THYM | 0.086380667  |
| UPP1 | Naive cd4+ t cell         | THYM | -0.303663764 |

|      |                             |      |              |
|------|-----------------------------|------|--------------|
| UPP1 | Naive cd8+ t cell           | THYM | -0.399566694 |
| UPP1 | Natural killer cell         | THYM | -0.034306663 |
| UPP1 | Natural killer t (nkt) cell | THYM | -0.45030236  |
| UPP1 | Natural regulatory t (treg) | THYM | -0.451928887 |
| UPP1 | Neomycin, kanamycin and     | THYM | 0.112314537  |
| UPP1 | Neutrophil                  | THYM | 0.539756038  |
| UPP1 | Nicotinate and nicotinami   | THYM | 0.012055824  |
| UPP1 | Nitrogen metabolism         | THYM | 0.003613341  |
| UPP1 | Nod_like_receptor_signal    | THYM | 0.396535088  |
| UPP1 | Notch_signaling             | THYM | 0.337905005  |
| UPP1 | One carbon pool by folate   | THYM | -0.34677375  |
| UPP1 | Other glycan degradation    | THYM | 0.374024087  |
| UPP1 | Other types of o-glycan b   | THYM | 0.473603836  |
| UPP1 | Oxidative phosphorylatio    | THYM | 0.069568022  |
| UPP1 | P53_pathway                 | THYM | 0.597660283  |
| UPP1 | P53_signaling_pathway       | THYM | -0.300676257 |
| UPP1 | Pantothenate and coa bios   | THYM | -0.166762091 |
| UPP1 | Pentose and glucuronate i   | THYM | 0.240602919  |
| UPP1 | Pentose phosphate pathwa    | THYM | 0.10932613   |
| UPP1 | Pericyte                    | THYM | 0.399192235  |
| UPP1 | Phenylalanine metabolism    | THYM | 0.569212218  |
| UPP1 | Phenylalanine, tyrosine ar  | THYM | 0.099740132  |
| UPP1 | Phosphonate and phosphir    | THYM | -0.019109743 |
| UPP1 | Pi3k_akt_activation         | THYM | -0.159850692 |
| UPP1 | Pi3k_akt_mtor_signaling     | THYM | -0.466782959 |
| UPP1 | Porphyrim and chlorophyl    | THYM | 0.389343953  |
| UPP1 | Primary bile acid biosynt   | THYM | 0.10035005   |
| UPP1 | Propanoate metabolism       | THYM | -0.101015233 |
| UPP1 | Purine metabolism           | THYM | -0.069967902 |
| UPP1 | Pyrimidine metabolism       | THYM | -0.137314447 |
| UPP1 | Pyruvate metabolism         | THYM | 0.080548026  |
| UPP1 | Regulation_of_autophagy     | THYM | -0.070319051 |
| UPP1 | Retinol metabolism          | THYM | 0.403228296  |
| UPP1 | Riboflavin metabolism       | THYM | 0.222614591  |
| UPP1 | Schmahl_pdgf_signaling      | THYM | 0.209647391  |
| UPP1 | Selenocompound metabol      | THYM | -0.117293823 |
| UPP1 | Signaling_by_hippo          | THYM | 0.016056926  |
| UPP1 | Sphingolipid metabolism     | THYM | 0.04180244   |
| UPP1 | Starch and sucrose metabo   | THYM | -0.025613061 |
| UPP1 | Steroid biosynthesis        | THYM | 0.336997698  |
| UPP1 | Steroid hormone biosynth    | THYM | 0.373609877  |
| UPP1 | Sulfur metabolism           | THYM | 0.382971386  |
| UPP1 | Synthesis and degradation   | THYM | -0.165763454 |

|      |                            |      |              |
|------|----------------------------|------|--------------|
| UPP1 | T helper cell              | THYM | -0.173847549 |
| UPP1 | T helper1 (th1) cell       | THYM | 0.186608374  |
| UPP1 | T helper17 (th17) cell     | THYM | 0.016960651  |
| UPP1 | T helper2 (th2) cell       | THYM | -0.139342001 |
| UPP1 | T helper9 (th9) cell       | THYM | -0.393361369 |
| UPP1 | Taurine and hypotaurine r  | THYM | 0.478956101  |
| UPP1 | Terpenoid backbone biosy   | THYM | 0.030961623  |
| UPP1 | Tgf_beta_signaling_pathw   | THYM | 0.089713121  |
| UPP1 | Thiamine metabolism        | THYM | 0.394943384  |
| UPP1 | Tnfa_signaling_via_nfkb    | THYM | 0.520511366  |
| UPP1 | Tryptophan metabolism      | THYM | 0.495546048  |
| UPP1 | Tumor endothelial cell     | THYM | 0.081935523  |
| UPP1 | Tyrosine metabolism        | THYM | 0.578292519  |
| UPP1 | Ubiquinone and other terp  | THYM | 0.34863333   |
| UPP1 | Valine, leucine and isoleu | THYM | 0.511463338  |
| UPP1 | Valine, leucine and isoleu | THYM | -0.110464235 |
| UPP1 | Vascular endothelial cell  | THYM | 0.527160047  |
| UPP1 | Vascular smooth muscle c   | THYM | 0.482246559  |
| UPP1 | Vegf_signaling_pathway     | THYM | 0.114620817  |
| UPP1 | Vitamin b6 metabolism      | THYM | 0.159930963  |
| UPP1 | Willert_wnt_signaling      | THYM | 0.129988461  |
| UPP1 | Wnt_beta_catenin_signali   | THYM | 0.093185184  |
| UPP2 | Abnormal plasma cell       | THYM | 0.006229562  |
| UPP2 | Activated b cell           | THYM | -0.199494636 |
| UPP2 | Activated cd4+ t cell      | THYM | -0.194762823 |
| UPP2 | Activated t cell           | THYM | -0.259154066 |
| UPP2 | Alanine, aspartate and glu | THYM | 0.039331299  |
| UPP2 | Alcala_apoptosis           | THYM | -0.389970647 |
| UPP2 | Alpha-linolenic acid meta  | THYM | -0.061988606 |
| UPP2 | Amino sugar and nucleoti   | THYM | -0.189330128 |
| UPP2 | Ampk_pathway               | THYM | -0.235742404 |
| UPP2 | Angiogenesis               | THYM | 0.169432509  |
| UPP2 | Arachidonic acid metabol   | THYM | -0.082398655 |
| UPP2 | Arginine and proline metæ  | THYM | 0.148391369  |
| UPP2 | Arginine biosynthesis      | THYM | 0.168359941  |
| UPP2 | Ascorbate and aldarate mε  | THYM | 0.096221622  |
| UPP2 | Atypical memory b cell     | THYM | -0.206568771 |
| UPP2 | Axl+siglec6+ dendritic ce  | THYM | -0.047100146 |
| UPP2 | B cell                     | THYM | -0.154220815 |
| UPP2 | B1 cell                    | THYM | -0.263378629 |
| UPP2 | Basal cell                 | THYM | 0.269531241  |
| UPP2 | Beta-alanine metabolism    | THYM | 0.314633689  |
| UPP2 | Biosynthesis of unsaturate | THYM | -0.176513139 |

|      |                             |      |              |
|------|-----------------------------|------|--------------|
| UPP2 | Biotin metabolism           | THYM | 0.09329238   |
| UPP2 | Butanoate metabolism        | THYM | -0.169694002 |
| UPP2 | Caffeine metabolism         | THYM | -0.113720221 |
| UPP2 | Cancer stem cell            | THYM | 0.193236817  |
| UPP2 | Cancer stem-like cell       | THYM | 0.100502822  |
| UPP2 | Cd4+ cytotoxic t cell       | THYM | -0.026924315 |
| UPP2 | Cd4+ memory t cell          | THYM | -0.186276337 |
| UPP2 | Cd4+ regulatory t cell      | THYM | -0.167596168 |
| UPP2 | Cd4+ t helper cell          | THYM | -0.204901379 |
| UPP2 | Cd4+cd25+ regulatory t c    | THYM | -0.212706134 |
| UPP2 | Cd8+ cytotoxic t cell       | THYM | -0.268615988 |
| UPP2 | Cd8+ regulatory t cell      | THYM | -0.23894097  |
| UPP2 | Cell_cycle                  | THYM | -0.301956163 |
| UPP2 | Chandran_metastasis_top5    | THYM | 0.048322041  |
| UPP2 | Citrate cycle (tca cycle)   | THYM | -0.101039232 |
| UPP2 | Cysteine and methionine r   | THYM | -0.172218644 |
| UPP2 | Cytokine induced killer cε  | THYM | -0.224703734 |
| UPP2 | D-arginine and d-ornithin   | THYM | -0.029926729 |
| UPP2 | D-glutamine and d-glutan    | THYM | 0.092814939  |
| UPP2 | Dendritic cell              | THYM | -0.067708105 |
| UPP2 | Dna_repair                  | THYM | -0.286041097 |
| UPP2 | Dna_replication             | THYM | -0.27624566  |
| UPP2 | Double-negative memory      | THYM | -0.127687198 |
| UPP2 | Drug metabolism - cytoch    | THYM | 0.114202319  |
| UPP2 | Drug metabolism - other (   | THYM | -0.146436425 |
| UPP2 | E2f_targets                 | THYM | -0.318832382 |
| UPP2 | Ecm_receptor_interaction    | THYM | 0.214652169  |
| UPP2 | Effector cd4+ memory t (    | THYM | -0.134058558 |
| UPP2 | Effector cd8+ memory t (    | THYM | -0.093935234 |
| UPP2 | Effector memory t cell      | THYM | -0.189226528 |
| UPP2 | Effector regulatory t (treg | THYM | -0.208659494 |
| UPP2 | Elvidge_hif1a_targets_up    | THYM | -0.295910371 |
| UPP2 | Endothelial cell            | THYM | 0.049781373  |
| UPP2 | Eosinophil                  | THYM | -0.121055373 |
| UPP2 | Ether lipid metabolism      | THYM | 0.012707149  |
| UPP2 | Exhausted cd4+ t cell       | THYM | -0.191595339 |
| UPP2 | Exhausted cd8+ t cell       | THYM | -0.081938146 |
| UPP2 | Exhausted t cell            | THYM | -0.25497427  |
| UPP2 | Fat cell (adipocyte)        | THYM | 0.247101284  |
| UPP2 | Fatty acid biosynthesis     | THYM | 0.239815726  |
| UPP2 | Fatty acid degradation      | THYM | 0.082166372  |
| UPP2 | Fatty acid elongation       | THYM | 0.037201698  |
| UPP2 | Fibroblast                  | THYM | 0.10749201   |

|      |                              |      |              |
|------|------------------------------|------|--------------|
| UPP2 | Folate biosynthesis          | THYM | -0.067438797 |
| UPP2 | Follicular b cell            | THYM | -0.113374231 |
| UPP2 | Follicular dendritic cell    | THYM | -0.077038145 |
| UPP2 | Follicular helper (tfh) t ce | THYM | -0.238878659 |
| UPP2 | Follicular t cell            | THYM | -0.273702201 |
| UPP2 | Foxp3+il-17+ t cell          | THYM | -0.000809176 |
| UPP2 | Fructose and mannose me      | THYM | -0.170018716 |
| UPP2 | G2m_checkpoint               | THYM | -0.307219367 |
| UPP2 | Galactose metabolism         | THYM | -0.26673223  |
| UPP2 | Galie_tumor_stemness_ge      | THYM | 0.181718511  |
| UPP2 | Glutathione metabolism       | THYM | -0.095535481 |
| UPP2 | Glycerolipid metabolism      | THYM | -0.11203159  |
| UPP2 | Glycerophospholipid metæ     | THYM | 0.024761758  |
| UPP2 | Glycine, serine and threor   | THYM | -0.015129323 |
| UPP2 | Glycolysis / gluconeogene    | THYM | -0.126405954 |
| UPP2 | Glycosaminoglycan biosy1     | THYM | 0.086600567  |
| UPP2 | Glycosaminoglycan biosy1     | THYM | 0.051643654  |
| UPP2 | Glycosaminoglycan biosy1     | THYM | 0.189722368  |
| UPP2 | Glycosaminoglycan degra      | THYM | 0.148373127  |
| UPP2 | Glycosphingolipid biosyn1    | THYM | 0.013798422  |
| UPP2 | Glycosphingolipid biosyn1    | THYM | 0.057988886  |
| UPP2 | Glycosphingolipid biosyn1    | THYM | 0.071718444  |
| UPP2 | Glycosylphosphatidylinos     | THYM | -0.085421212 |
| UPP2 | Glyoxylate and dicarboxy     | THYM | -0.121541845 |
| UPP2 | Granulocyte                  | THYM | -0.028640398 |
| UPP2 | Hedgehog_signaling           | THYM | 0.211373248  |
| UPP2 | Histidine metabolism         | THYM | 0.29439279   |
| UPP2 | Hypoxia                      | THYM | 0.055797008  |
| UPP2 | Il-17ralpha t cell           | THYM | -0.21734365  |
| UPP2 | Il2_stat5_signaling          | THYM | 0.037378786  |
| UPP2 | Il6_jak_stat3_signaling      | THYM | -0.014886436 |
| UPP2 | Immune_checkpoints_tunr      | THYM | -0.060450489 |
| UPP2 | Immune_inhibition_cytok      | THYM | 0.012740011  |
| UPP2 | Inositol phosphate metabo    | THYM | 0.094204627  |
| UPP2 | Interleukin_6_signaling      | THYM | 0.112508944  |
| UPP2 | Jaeger_metastasis_up         | THYM | -0.310144757 |
| UPP2 | Jain_nfkb_signaling          | THYM | -0.313520473 |
| UPP2 | Kras_signaling_up            | THYM | 0.060027238  |
| UPP2 | Linoleic acid metabolism     | THYM | 0.059406816  |
| UPP2 | Lipoic acid metabolism       | THYM | 0.249255583  |
| UPP2 | Lysine degradation           | THYM | 0.211944537  |
| UPP2 | Lysosome                     | THYM | 0.026594896  |
| UPP2 | M1 macrophage                | THYM | 0.032988428  |



|      |                             |      |              |
|------|-----------------------------|------|--------------|
| UPP2 | M2 macrophage               | THYM | -0.015918464 |
| UPP2 | Mannose type o-glycan bi    | THYM | 0.316926706  |
| UPP2 | Mapk_signaling_pathway      | THYM | 0.135162707  |
| UPP2 | Mapk3_erk1_activation       | THYM | 0.076966258  |
| UPP2 | Marginal zone b cell        | THYM | -0.176067442 |
| UPP2 | Memory b cell               | THYM | -0.095608809 |
| UPP2 | Mesenchymal cell            | THYM | 0.130450651  |
| UPP2 | Mesenchymal stem cell       | THYM | 0.135012065  |
| UPP2 | Metabolism of xenobiotic    | THYM | 0.043145431  |
| UPP2 | Migrating cancer stem cel   | THYM | 0.190984986  |
| UPP2 | Mitotic_spindle             | THYM | -0.1017481   |
| UPP2 | Monocyte                    | THYM | -0.108793992 |
| UPP2 | Mtor_signaling_pathway      | THYM | 0.134606152  |
| UPP2 | Mtorc1_signaling            | THYM | -0.325833652 |
| UPP2 | Mucin type o-glycan bios    | THYM | 0.163916546  |
| UPP2 | Myc_targets_v1              | THYM | -0.314407453 |
| UPP2 | Myeloid cell                | THYM | -0.142085722 |
| UPP2 | N-glycan biosynthesis       | THYM | -0.077768602 |
| UPP2 | Naive b cell                | THYM | -0.196493521 |
| UPP2 | Naive cd4+ t cell           | THYM | -0.041439519 |
| UPP2 | Naive cd8+ t cell           | THYM | -0.10631582  |
| UPP2 | Natural killer cell         | THYM | -0.244655501 |
| UPP2 | Natural killer t (nkt) cell | THYM | -0.329573992 |
| UPP2 | Natural regulatory t (treg) | THYM | -0.233925417 |
| UPP2 | Neomycin, kanamycin and     | THYM | -0.248718571 |
| UPP2 | Neutrophil                  | THYM | -0.085386131 |
| UPP2 | Nicotinate and nicotinami   | THYM | 0.000154285  |
| UPP2 | Nitrogen metabolism         | THYM | 0.147421213  |
| UPP2 | Nod_like_receptor_signal    | THYM | 0.0323613    |
| UPP2 | Notch_signaling             | THYM | 0.253721786  |
| UPP2 | One carbon pool by folate   | THYM | -0.281975877 |
| UPP2 | Other glycan degradation    | THYM | 0.006201228  |
| UPP2 | Other types of o-glycan b   | THYM | 0.241485527  |
| UPP2 | Oxidative phosphorylatio    | THYM | -0.207351812 |
| UPP2 | P53_pathway                 | THYM | 0.097839245  |
| UPP2 | P53_signaling_pathway       | THYM | -0.272452316 |
| UPP2 | Pantothenate and coa bios   | THYM | -0.140726353 |
| UPP2 | Pentose and glucuronate i   | THYM | -0.105039616 |
| UPP2 | Pentose phosphate pathwa    | THYM | -0.30985184  |
| UPP2 | Pericyte                    | THYM | 0.129371047  |
| UPP2 | Phenylalanine metabolism    | THYM | 0.04131922   |
| UPP2 | Phenylalanine, tyrosine ar  | THYM | -0.049113429 |
| UPP2 | Phosphonate and phosphir    | THYM | -0.151758552 |

|      |                            |      |              |
|------|----------------------------|------|--------------|
| UPP2 | Pi3k_akt_activation        | THYM | 0.199422831  |
| UPP2 | Pi3k_akt_mtor_signaling    | THYM | -0.375989893 |
| UPP2 | Porphyrin and chlorophyl   | THYM | -0.137154415 |
| UPP2 | Primary bile acid biosynt  | THYM | 0.135783697  |
| UPP2 | Propanoate metabolism      | THYM | 0.079676328  |
| UPP2 | Purine metabolism          | THYM | -0.249849093 |
| UPP2 | Pyrimidine metabolism      | THYM | -0.272516283 |
| UPP2 | Pyruvate metabolism        | THYM | 0.014218229  |
| UPP2 | Regulation_of_autophagy    | THYM | -0.315464881 |
| UPP2 | Retinol metabolism         | THYM | -0.030374932 |
| UPP2 | Riboflavin metabolism      | THYM | -0.105197948 |
| UPP2 | Schmahl_pdgf_signaling     | THYM | 0.260485595  |
| UPP2 | Selenocompound metabol     | THYM | -0.182941345 |
| UPP2 | Signaling_by_hippo         | THYM | 0.232644923  |
| UPP2 | Sphingolipid metabolism    | THYM | 0.224811326  |
| UPP2 | Starch and sucrose metabo  | THYM | -0.07417123  |
| UPP2 | Steroid biosynthesis       | THYM | -0.109248304 |
| UPP2 | Steroid hormone biosynth   | THYM | 0.04497109   |
| UPP2 | Sulfur metabolism          | THYM | 0.213691735  |
| UPP2 | Synthesis and degradation  | THYM | -0.122506395 |
| UPP2 | T helper cell              | THYM | -0.23586827  |
| UPP2 | T helper1 (th1) cell       | THYM | -0.200761808 |
| UPP2 | T helper17 (th17) cell     | THYM | -0.140447433 |
| UPP2 | T helper2 (th2) cell       | THYM | -0.237343887 |
| UPP2 | T helper9 (th9) cell       | THYM | -0.238515235 |
| UPP2 | Taurine and hypotaurine r  | THYM | -0.019787051 |
| UPP2 | Terpenoid backbone biosy   | THYM | -0.212105822 |
| UPP2 | Tgf_beta_signaling_pathw   | THYM | 0.210882208  |
| UPP2 | Thiamine metabolism        | THYM | -0.017613131 |
| UPP2 | Tnfa_signaling_via_nfb     | THYM | 0.069824414  |
| UPP2 | Tryptophan metabolism      | THYM | 0.071877283  |
| UPP2 | Tumor endothelial cell     | THYM | 0.05408213   |
| UPP2 | Tyrosine metabolism        | THYM | 0.096342865  |
| UPP2 | Ubiquinone and other ter   | THYM | -0.149641923 |
| UPP2 | Valine, leucine and isoleu | THYM | -0.205631841 |
| UPP2 | Valine, leucine and isoleu | THYM | 0.105771153  |
| UPP2 | Vascular endothelial cell  | THYM | 0.093427379  |
| UPP2 | Vascular smooth muscle c   | THYM | 0.121540335  |
| UPP2 | Vegf_signaling_pathway     | THYM | -0.041355612 |
| UPP2 | Vitamin b6 metabolism      | THYM | -0.004252289 |
| UPP2 | Willert_wnt_signaling      | THYM | -0.180189011 |
| UPP2 | Wnt_beta_catenin_signali   | THYM | 0.287452559  |
| CDA  | Abnormal plasma cell       | UCEC | 0.235463136  |

|     |                            |      |              |
|-----|----------------------------|------|--------------|
| CDA | Activated b cell           | UCEC | 0.14417728   |
| CDA | Activated cd4+ t cell      | UCEC | 0.100623091  |
| CDA | Activated t cell           | UCEC | 0.142724076  |
| CDA | Alanine, aspartate and glu | UCEC | 0.013260532  |
| CDA | Alcala_apoptosis           | UCEC | 0.00833015   |
| CDA | Alpha-linolenic acid meta  | UCEC | 0.186129004  |
| CDA | Amino sugar and nucleoti   | UCEC | 0.089492627  |
| CDA | Ampk_pathway               | UCEC | -0.102675642 |
| CDA | Angiogenesis               | UCEC | 0.327777829  |
| CDA | Arachidonic acid metabol   | UCEC | 0.403073703  |
| CDA | Arginine and proline meta  | UCEC | 0.114950513  |
| CDA | Arginine biosynthesis      | UCEC | 0.244810674  |
| CDA | Ascorbate and aldarate mε  | UCEC | 0.053815875  |
| CDA | Atypical memory b cell     | UCEC | 0.113489606  |
| CDA | Axl+siglec6+ dendritic ce  | UCEC | 0.383927641  |
| CDA | B cell                     | UCEC | 0.081188575  |
| CDA | B1 cell                    | UCEC | 0.13559675   |
| CDA | Basal cell                 | UCEC | 0.516548076  |
| CDA | Beta-alanine metabolism    | UCEC | -0.021522891 |
| CDA | Biosynthesis of unsaturate | UCEC | -0.021816657 |
| CDA | Biotin metabolism          | UCEC | -0.016098474 |
| CDA | Butanoate metabolism       | UCEC | -0.169443582 |
| CDA | Caffeine metabolism        | UCEC | 0.22256671   |
| CDA | Cancer stem cell           | UCEC | 0.229480477  |
| CDA | Cancer stem-like cell      | UCEC | 0.119562206  |
| CDA | Cd4+ cytotoxic t cell      | UCEC | 0.266364516  |
| CDA | Cd4+ memory t cell         | UCEC | 0.179447121  |
| CDA | Cd4+ regulatory t cell     | UCEC | 0.073883185  |
| CDA | Cd4+ t helper cell         | UCEC | 0.120982063  |
| CDA | Cd4+cd25+ regulatory t c   | UCEC | 0.113458155  |
| CDA | Cd8+ cytotoxic t cell      | UCEC | 0.21487779   |
| CDA | Cd8+ regulatory t cell     | UCEC | 0.150942371  |
| CDA | Cell_cycle                 | UCEC | -0.194536074 |
| CDA | Chandran_metastasis_top5   | UCEC | -0.340834626 |
| CDA | Citrate cycle (tca cycle)  | UCEC | -0.1517917   |
| CDA | Cysteine and methionine r  | UCEC | -0.0639764   |
| CDA | Cytokine induced killer cε | UCEC | 0.195618795  |
| CDA | D-arginine and d-ornithin  | UCEC | 0.003429935  |
| CDA | D-glutamine and d-glutan   | UCEC | 0.036229822  |
| CDA | Dendritic cell             | UCEC | 0.214730459  |
| CDA | Dna_repair                 | UCEC | -0.034480923 |
| CDA | Dna_replication            | UCEC | -0.167934682 |
| CDA | Double-negative memory     | UCEC | 0.14387369   |

|     |                              |      |              |
|-----|------------------------------|------|--------------|
| CDA | Drug metabolism - cytoch     | UCEC | 0.224695483  |
| CDA | Drug metabolism - other      | UCEC | 0.298486627  |
| CDA | E2f_targets                  | UCEC | -0.213852283 |
| CDA | Ecm_receptor_interaction     | UCEC | 0.286616833  |
| CDA | Effector cd4+ memory t       | UCEC | 0.081206555  |
| CDA | Effector cd8+ memory t       | UCEC | 0.234081892  |
| CDA | Effector memory t cell       | UCEC | 0.142634263  |
| CDA | Effector regulatory t (treg) | UCEC | 0.100153829  |
| CDA | Elvidge_hif1a_targets_up     | UCEC | -0.196670763 |
| CDA | Endothelial cell             | UCEC | 0.11444791   |
| CDA | Eosinophil                   | UCEC | 0.235917803  |
| CDA | Ether lipid metabolism       | UCEC | 0.286757242  |
| CDA | Exhausted cd4+ t cell        | UCEC | 0.158619503  |
| CDA | Exhausted cd8+ t cell        | UCEC | 0.198857981  |
| CDA | Exhausted t cell             | UCEC | 0.148486135  |
| CDA | Fat cell (adipocyte)         | UCEC | 0.014853482  |
| CDA | Fatty acid biosynthesis      | UCEC | 0.073013695  |
| CDA | Fatty acid degradation       | UCEC | -0.048450372 |
| CDA | Fatty acid elongation        | UCEC | 0.118570748  |
| CDA | Fibroblast                   | UCEC | 0.212925265  |
| CDA | Folate biosynthesis          | UCEC | 0.119788756  |
| CDA | Follicular b cell            | UCEC | 0.173186725  |
| CDA | Follicular dendritic cell    | UCEC | -0.003693885 |
| CDA | Follicular helper (tfh) t ce | UCEC | 0.189134558  |
| CDA | Follicular t cell            | UCEC | 0.22927773   |
| CDA | Foxp3+il-17+ t cell          | UCEC | 0.03236403   |
| CDA | Fructose and mannose me      | UCEC | 0.102241859  |
| CDA | G2m_checkpoint               | UCEC | -0.253820175 |
| CDA | Galactose metabolism         | UCEC | 0.131787075  |
| CDA | Galie_tumor_stemness_ge      | UCEC | 0.101951771  |
| CDA | Glutathione metabolism       | UCEC | 0.0866294    |
| CDA | Glycerolipid metabolism      | UCEC | 0.181673558  |
| CDA | Glycerophospholipid met      | UCEC | 0.278108788  |
| CDA | Glycine, serine and threor   | UCEC | 0.019437464  |
| CDA | Glycolysis / gluconeogene    | UCEC | 0.025752403  |
| CDA | Glycosaminoglycan biosy      | UCEC | 0.219885623  |
| CDA | Glycosaminoglycan biosy      | UCEC | -0.10328544  |
| CDA | Glycosaminoglycan biosy      | UCEC | 0.102481903  |
| CDA | Glycosaminoglycan degra      | UCEC | 0.229309164  |
| CDA | Glycosphingolipid biosyn     | UCEC | 0.15651899   |
| CDA | Glycosphingolipid biosyn     | UCEC | 0.365170885  |
| CDA | Glycosphingolipid biosyn     | UCEC | 0.248746496  |
| CDA | Glycosylphosphatidylinos     | UCEC | -0.253650806 |

|     |                             |      |              |
|-----|-----------------------------|------|--------------|
| CDA | Glyoxylate and dicarboxy    | UCEC | -0.097398158 |
| CDA | Granulocyte                 | UCEC | 0.121606755  |
| CDA | Hedgehog_signaling          | UCEC | 0.002187994  |
| CDA | Histidine metabolism        | UCEC | 0.183408908  |
| CDA | Hypoxia                     | UCEC | 0.225250274  |
| CDA | Il-17alpha t cell           | UCEC | 0.157656939  |
| CDA | Il2_stat5_signaling         | UCEC | 0.37181837   |
| CDA | Il6_jak_stat3_signaling     | UCEC | 0.287773331  |
| CDA | Immune_checkpoints_turr     | UCEC | 0.134840467  |
| CDA | Immune_inhibition_cytok     | UCEC | 0.304170885  |
| CDA | Inositol phosphate metabo   | UCEC | -0.121166179 |
| CDA | Interleukin_6_signaling     | UCEC | 0.036583562  |
| CDA | Jaeger_metastasis_up        | UCEC | 0.010599304  |
| CDA | Jain_nfkb_signaling         | UCEC | -0.151753906 |
| CDA | Kras_signaling_up           | UCEC | 0.346494484  |
| CDA | Linoleic acid metabolism    | UCEC | 0.311916915  |
| CDA | Lipoic acid metabolism      | UCEC | -0.080743399 |
| CDA | Lysine degradation          | UCEC | -0.312182418 |
| CDA | Lysosome                    | UCEC | 0.155043819  |
| CDA | M1 macrophage               | UCEC | 0.106529064  |
| CDA | M2 macrophage               | UCEC | 0.125360912  |
| CDA | Mannose type o-glycan bi    | UCEC | -0.016471643 |
| CDA | Mapk_signaling_pathway      | UCEC | 0.271107739  |
| CDA | Mapk3_erk1_activation       | UCEC | -0.021083357 |
| CDA | Marginal zone b cell        | UCEC | -0.027155641 |
| CDA | Memory b cell               | UCEC | 0.074468236  |
| CDA | Mesenchymal cell            | UCEC | 0.154302883  |
| CDA | Mesenchymal stem cell       | UCEC | 0.237602429  |
| CDA | Metabolism of xenobiotic    | UCEC | 0.285904874  |
| CDA | Migrating cancer stem cel   | UCEC | 0.157875497  |
| CDA | Mitotic_spindle             | UCEC | -0.195205028 |
| CDA | Monocyte                    | UCEC | 0.350983121  |
| CDA | Mtor_signaling_pathway      | UCEC | -0.047742766 |
| CDA | Mtorc1_signaling            | UCEC | -0.070062644 |
| CDA | Mucin type o-glycan biosy   | UCEC | 0.017763201  |
| CDA | Myc_targets_v1              | UCEC | -0.149400064 |
| CDA | Myeloid cell                | UCEC | 0.147461611  |
| CDA | N-glycan biosynthesis       | UCEC | -0.222463372 |
| CDA | Naive b cell                | UCEC | 0.146721672  |
| CDA | Naive cd4+ t cell           | UCEC | 0.106858677  |
| CDA | Naive cd8+ t cell           | UCEC | 0.107784442  |
| CDA | Natural killer cell         | UCEC | 0.199530767  |
| CDA | Natural killer t (nkt) cell | UCEC | -0.013779124 |

|     |                                  |              |
|-----|----------------------------------|--------------|
| CDA | Natural regulatory t (treg) UCEC | 0.123978325  |
| CDA | Neomycin, kanamycin and UCEC     | 0.187331321  |
| CDA | Neutrophil UCEC                  | 0.393292104  |
| CDA | Nicotinate and nicotinami UCEC   | 0.241493217  |
| CDA | Nitrogen metabolism UCEC         | 0.098726951  |
| CDA | Nod_like_receptor_signal: UCEC   | 0.170980654  |
| CDA | Notch_signaling UCEC             | 0.142011524  |
| CDA | One carbon pool by folate UCEC   | -0.057089237 |
| CDA | Other glycan degradation UCEC    | 0.084552313  |
| CDA | Other types of o-glycan b: UCEC  | -0.007953179 |
| CDA | Oxidative phosphorylatior UCEC   | 0.112782419  |
| CDA | P53_pathway UCEC                 | 0.372028995  |
| CDA | P53_signaling_pathway UCEC       | -0.040455371 |
| CDA | Pantothenate and coa bios UCEC   | 0.132187173  |
| CDA | Pentose and glucuronate in UCEC  | 0.104529093  |
| CDA | Pentose phosphate pathwa UCEC    | -0.002179201 |
| CDA | Pericyte UCEC                    | 0.24899054   |
| CDA | Phenylalanine metabolism UCEC    | 0.284485213  |
| CDA | Phenylalanine, tyrosine ar UCEC  | 0.128277149  |
| CDA | Phosphonate and phosphir UCEC    | -0.116647873 |
| CDA | Pi3k_akt_activation UCEC         | -0.103488529 |
| CDA | Pi3k_akt_mtor_signaling UCEC     | 0.022879953  |
| CDA | Porphyrin and chlorophyl UCEC    | 0.069998642  |
| CDA | Primary bile acid biosynt# UCEC  | 0.211973012  |
| CDA | Propanoate metabolism UCEC       | -0.216814722 |
| CDA | Purine metabolism UCEC           | -0.022043914 |
| CDA | Pyrimidine metabolism UCEC       | -0.050949976 |
| CDA | Pyruvate metabolism UCEC         | -0.089982434 |
| CDA | Regulation_of_autophagy UCEC     | -0.057138986 |
| CDA | Retinol metabolism UCEC          | 0.349899814  |
| CDA | Riboflavin metabolism UCEC       | 0.206624411  |
| CDA | Schmahl_pdgf_signaling UCEC      | 0.065619079  |
| CDA | Selenocompound metabol UCEC      | -0.134446902 |
| CDA | Signaling_by_hippo UCEC          | -0.122258917 |
| CDA | Sphingolipid metabolism UCEC     | 0.001785111  |
| CDA | Starch and sucrose metabo UCEC   | 0.035429234  |
| CDA | Steroid biosynthesis UCEC        | -0.020332223 |
| CDA | Steroid hormone biosynth UCEC    | 0.278984304  |
| CDA | Sulfur metabolism UCEC           | 0.14472814   |
| CDA | Synthesis and degradation UCEC   | -0.121651214 |
| CDA | T helper cell UCEC               | 0.214184915  |
| CDA | T helper1 (th1) cell UCEC        | 0.197623147  |
| CDA | T helper17 (th17) cell UCEC      | 0.266113768  |

|      |                            |      |              |
|------|----------------------------|------|--------------|
| CDA  | T helper2 (th2) cell       | UCEC | 0.2549734    |
| CDA  | T helper9 (th9) cell       | UCEC | 0.171201293  |
| CDA  | Taurine and hypotaurine r  | UCEC | 0.088597243  |
| CDA  | Terpenoid backbone biosy   | UCEC | -0.104248933 |
| CDA  | Tgf_beta_signaling_pathw   | UCEC | 0.012046293  |
| CDA  | Thiamine metabolism        | UCEC | 0.003414859  |
| CDA  | Tnfa_signaling_via_nfkB    | UCEC | 0.349009071  |
| CDA  | Tryptophan metabolism      | UCEC | 0.048955329  |
| CDA  | Tumor endothelial cell     | UCEC | 0.253389171  |
| CDA  | Tyrosine metabolism        | UCEC | 0.259487077  |
| CDA  | Ubiquinone and other terf  | UCEC | 0.016418244  |
| CDA  | Valine, leucine and isoleu | UCEC | 0.226510376  |
| CDA  | Valine, leucine and isoleu | UCEC | -0.17666221  |
| CDA  | Vascular endothelial cell  | UCEC | 0.322158719  |
| CDA  | Vascular smooth muscle c   | UCEC | 0.23849391   |
| CDA  | Vegf_signaling_pathway     | UCEC | 0.284952433  |
| CDA  | Vitamin b6 metabolism      | UCEC | 0.093495025  |
| CDA  | Willert_wnt_signaling      | UCEC | 0.136771251  |
| CDA  | Wnt_beta_catenin_signali   | UCEC | 0.022327604  |
| UCK1 | Abnormal plasma cell       | UCEC | 0.057424802  |
| UCK1 | Activated b cell           | UCEC | 0.122562706  |
| UCK1 | Activated cd4+ t cell      | UCEC | -0.003058544 |
| UCK1 | Activated t cell           | UCEC | 0.126364618  |
| UCK1 | Alanine, aspartate and glu | UCEC | 0.022416219  |
| UCK1 | Alcala_apoptosis           | UCEC | 0.116266782  |
| UCK1 | Alpha-linolenic acid meta  | UCEC | 0.320743601  |
| UCK1 | Amino sugar and nucleoti   | UCEC | 0.137628126  |
| UCK1 | Ampk_pathway               | UCEC | 0.106832185  |
| UCK1 | Angiogenesis               | UCEC | -0.03097812  |
| UCK1 | Arachidonic acid metabol   | UCEC | 0.340635414  |
| UCK1 | Arginine and proline met   | UCEC | 0.153563723  |
| UCK1 | Arginine biosynthesis      | UCEC | 0.105095411  |
| UCK1 | Ascorbate and aldarate me  | UCEC | -0.063916484 |
| UCK1 | Atypical memory b cell     | UCEC | 0.061868677  |
| UCK1 | Axl+siglec6+ dendritic ce  | UCEC | 0.068747817  |
| UCK1 | B cell                     | UCEC | -0.075212977 |
| UCK1 | B1 cell                    | UCEC | 0.09476123   |
| UCK1 | Basal cell                 | UCEC | 0.041508924  |
| UCK1 | Beta-alanine metabolism    | UCEC | 0.084923531  |
| UCK1 | Biosynthesis of unsaturate | UCEC | 0.163641027  |
| UCK1 | Biotin metabolism          | UCEC | 0.069414765  |
| UCK1 | Butanoate metabolism       | UCEC | 0.073490036  |
| UCK1 | Caffeine metabolism        | UCEC | 0.035513487  |

|      |                             |      |              |
|------|-----------------------------|------|--------------|
| UCK1 | Cancer stem cell            | UCEC | -0.279643781 |
| UCK1 | Cancer stem-like cell       | UCEC | -0.145728299 |
| UCK1 | Cd4+ cytotoxic t cell       | UCEC | 0.092807139  |
| UCK1 | Cd4+ memory t cell          | UCEC | 0.110381923  |
| UCK1 | Cd4+ regulatory t cell      | UCEC | 0.043612506  |
| UCK1 | Cd4+ t helper cell          | UCEC | 0.075127307  |
| UCK1 | Cd4+cd25+ regulatory t c    | UCEC | 0.072579093  |
| UCK1 | Cd8+ cytotoxic t cell       | UCEC | 0.115424672  |
| UCK1 | Cd8+ regulatory t cell      | UCEC | 0.09681836   |
| UCK1 | Cell_cycle                  | UCEC | -0.128411574 |
| UCK1 | Chandran_metastasis_top5    | UCEC | -0.478174734 |
| UCK1 | Citrate cycle (tca cycle)   | UCEC | -0.05740147  |
| UCK1 | Cysteine and methionine r   | UCEC | -0.08766605  |
| UCK1 | Cytokine induced killer c   | UCEC | 0.213602444  |
| UCK1 | D-arginine and d-ornithin   | UCEC | -0.071133371 |
| UCK1 | D-glutamine and d-glutan    | UCEC | -0.187637026 |
| UCK1 | Dendritic cell              | UCEC | -0.01315307  |
| UCK1 | Dna_repair                  | UCEC | 0.298446115  |
| UCK1 | Dna_replication             | UCEC | 0.092980745  |
| UCK1 | Double-negative memory      | UCEC | 0.243675415  |
| UCK1 | Drug metabolism - cytoch    | UCEC | 0.177251727  |
| UCK1 | Drug metabolism - other     | UCEC | 0.359615254  |
| UCK1 | E2f_targets                 | UCEC | -0.092918968 |
| UCK1 | Ecm_receptor_interaction    | UCEC | -0.109842877 |
| UCK1 | Effector cd4+ memory t (    | UCEC | -0.089664743 |
| UCK1 | Effector cd8+ memory t (    | UCEC | 0.040379296  |
| UCK1 | Effector memory t cell      | UCEC | 0.013325865  |
| UCK1 | Effector regulatory t (treg | UCEC | -0.038355074 |
| UCK1 | Elvidge_hif1a_targets_up    | UCEC | -0.261563411 |
| UCK1 | Endothelial cell            | UCEC | -0.195264557 |
| UCK1 | Eosinophil                  | UCEC | 0.019890497  |
| UCK1 | Ether lipid metabolism      | UCEC | 0.147134157  |
| UCK1 | Exhausted cd4+ t cell       | UCEC | -0.096256225 |
| UCK1 | Exhausted cd8+ t cell       | UCEC | -0.066967152 |
| UCK1 | Exhausted t cell            | UCEC | 0.19118369   |
| UCK1 | Fat cell (adipocyte)        | UCEC | 0.216134218  |
| UCK1 | Fatty acid biosynthesis     | UCEC | 0.014193929  |
| UCK1 | Fatty acid degradation      | UCEC | 0.092910765  |
| UCK1 | Fatty acid elongation       | UCEC | 0.109302675  |
| UCK1 | Fibroblast                  | UCEC | -0.0907142   |
| UCK1 | Folate biosynthesis         | UCEC | 0.16320814   |
| UCK1 | Follicular b cell           | UCEC | 0.014409752  |
| UCK1 | Follicular dendritic cell   | UCEC | 0.010999331  |



|      |                              |      |              |
|------|------------------------------|------|--------------|
| UCK1 | Follicular helper (tfh) t ce | UCEC | 0.08215465   |
| UCK1 | Follicular t cell            | UCEC | 0.254039651  |
| UCK1 | Foxp3+il-17+ t cell          | UCEC | 0.069839525  |
| UCK1 | Fructose and mannose me      | UCEC | 0.266118227  |
| UCK1 | G2m_checkpoint               | UCEC | -0.189532664 |
| UCK1 | Galactose metabolism         | UCEC | 0.128570525  |
| UCK1 | Galie_tumor_stemness_ge      | UCEC | -0.103349503 |
| UCK1 | Glutathione metabolism       | UCEC | 0.137305321  |
| UCK1 | Glycerolipid metabolism      | UCEC | 0.15716689   |
| UCK1 | Glycerophospholipid metæ     | UCEC | 0.324553549  |
| UCK1 | Glycine, serine and threor   | UCEC | 0.18931442   |
| UCK1 | Glycolysis / gluconeogene    | UCEC | 0.105305677  |
| UCK1 | Glycosaminoglycan biosy      | UCEC | 0.215222553  |
| UCK1 | Glycosaminoglycan biosy      | UCEC | -0.023369455 |
| UCK1 | Glycosaminoglycan biosy      | UCEC | -0.031396744 |
| UCK1 | Glycosaminoglycan degra      | UCEC | 0.075038259  |
| UCK1 | Glycosphingolipid biosyn     | UCEC | 0.10816903   |
| UCK1 | Glycosphingolipid biosyn     | UCEC | 0.068688915  |
| UCK1 | Glycosphingolipid biosyn     | UCEC | 0.046893009  |
| UCK1 | Glycosylphosphatidylinos     | UCEC | -0.038839725 |
| UCK1 | Glyoxylate and dicarboxy     | UCEC | 0.120864476  |
| UCK1 | Granulocyte                  | UCEC | 0.001190436  |
| UCK1 | Hedgehog_signaling           | UCEC | -0.164399881 |
| UCK1 | Histidine metabolism         | UCEC | 0.194491242  |
| UCK1 | Hypoxia                      | UCEC | -0.071852143 |
| UCK1 | Il-17ralpha t cell           | UCEC | 0.13859095   |
| UCK1 | Il2_stat5_signaling          | UCEC | -0.01448189  |
| UCK1 | Il6_jak_stat3_signaling      | UCEC | -0.10422248  |
| UCK1 | Immune_checkpoints_tur       | UCEC | -0.089286152 |
| UCK1 | Immune_inhibition_cytok      | UCEC | 0.085352368  |
| UCK1 | Inositol phosphate metabo    | UCEC | -0.313709517 |
| UCK1 | Interleukin_6_signaling      | UCEC | -0.394663811 |
| UCK1 | Jaeger_metastasis_up         | UCEC | -0.041638346 |
| UCK1 | Jain_nfkb_signaling          | UCEC | -0.074354402 |
| UCK1 | Kras_signaling_up            | UCEC | -0.082833972 |
| UCK1 | Linoleic acid metabolism     | UCEC | 0.33364074   |
| UCK1 | Lipoic acid metabolism       | UCEC | 0.204899503  |
| UCK1 | Lysine degradation           | UCEC | -0.017622589 |
| UCK1 | Lysosome                     | UCEC | 0.082391577  |
| UCK1 | M1 macrophage                | UCEC | -0.027655531 |
| UCK1 | M2 macrophage                | UCEC | -0.017294786 |
| UCK1 | Mannose type o-glycan bi     | UCEC | 0.221407143  |
| UCK1 | Mapk_signaling_pathway       | UCEC | -0.132488627 |

|      |                                                   |      |              |
|------|---------------------------------------------------|------|--------------|
| UCK1 | Mapk3_erk1_activation                             | UCEC | -0.345343454 |
| UCK1 | Marginal zone b cell                              | UCEC | -0.097889723 |
| UCK1 | Memory b cell                                     | UCEC | 0.139985564  |
| UCK1 | Mesenchymal cell                                  | UCEC | -0.011327167 |
| UCK1 | Mesenchymal stem cell                             | UCEC | -0.166741628 |
| UCK1 | Metabolism of xenobiotics                         | UCEC | 0.223210801  |
| UCK1 | Migrating cancer stem cell                        | UCEC | -0.155583043 |
| UCK1 | Mitotic_spindle                                   | UCEC | -0.332262789 |
| UCK1 | Monocyte                                          | UCEC | -0.023561567 |
| UCK1 | Mtor_signaling_pathway                            | UCEC | -0.008020113 |
| UCK1 | Mtorc1_signaling                                  | UCEC | -0.135300791 |
| UCK1 | Mucin type o-glycan biosynthesis                  | UCEC | -0.362888501 |
| UCK1 | Myc_targets_v1                                    | UCEC | -0.024995751 |
| UCK1 | Myeloid cell                                      | UCEC | 0.002097824  |
| UCK1 | N-glycan biosynthesis                             | UCEC | -0.141538183 |
| UCK1 | Naive b cell                                      | UCEC | 0.172289836  |
| UCK1 | Naive cd4+ t cell                                 | UCEC | -0.142622252 |
| UCK1 | Naive cd8+ t cell                                 | UCEC | -0.130822792 |
| UCK1 | Natural killer cell                               | UCEC | 0.093505681  |
| UCK1 | Natural killer t (nkt) cell                       | UCEC | -0.087132344 |
| UCK1 | Natural regulatory t (treg) cell                  | UCEC | -0.032248162 |
| UCK1 | Neomycin, kanamycin and streptomycin              | UCEC | 0.036117831  |
| UCK1 | Neutrophil                                        | UCEC | -0.015531878 |
| UCK1 | Nicotinate and nicotinamide metabolism            | UCEC | 0.179920974  |
| UCK1 | Nitrogen metabolism                               | UCEC | -0.024346984 |
| UCK1 | Nod_like_receptor_signaling                       | UCEC | -0.152424462 |
| UCK1 | Notch_signaling                                   | UCEC | -0.066698574 |
| UCK1 | One carbon pool by folate                         | UCEC | 0.028972345  |
| UCK1 | Other glycan degradation                          | UCEC | 0.149428966  |
| UCK1 | Other types of o-glycan biosynthesis              | UCEC | 0.336992486  |
| UCK1 | Oxidative phosphorylation                         | UCEC | 0.34295233   |
| UCK1 | P53_pathway                                       | UCEC | 0.159024269  |
| UCK1 | P53_signaling_pathway                             | UCEC | -0.134101992 |
| UCK1 | Pantothenate and coenzyme a biosynthesis          | UCEC | 0.02335689   |
| UCK1 | Pentose and glucuronate interconversions          | UCEC | -0.055824596 |
| UCK1 | Pentose phosphate pathway                         | UCEC | 0.032193695  |
| UCK1 | Pericyte                                          | UCEC | 0.022888759  |
| UCK1 | Phenylalanine metabolism                          | UCEC | 0.31606053   |
| UCK1 | Phenylalanine, tyrosine and tryptophan metabolism | UCEC | 0.203451396  |
| UCK1 | Phosphonate and phosphite metabolism              | UCEC | -0.038579122 |
| UCK1 | Pi3k_akt_activation                               | UCEC | -0.39060713  |
| UCK1 | Pi3k_akt_mtor_signaling                           | UCEC | -0.104947598 |
| UCK1 | Porphyrin and chlorophyll metabolism              | UCEC | 0.170004762  |

|      |                            |      |              |
|------|----------------------------|------|--------------|
| UCK1 | Primary bile acid biosynt  | UCEC | 0.148051476  |
| UCK1 | Propanoate metabolism      | UCEC | -0.118966372 |
| UCK1 | Purine metabolism          | UCEC | 0.181757698  |
| UCK1 | Pyrimidine metabolism      | UCEC | 0.22577301   |
| UCK1 | Pyruvate metabolism        | UCEC | 0.115102099  |
| UCK1 | Regulation_of_autophagy    | UCEC | -0.144820569 |
| UCK1 | Retinol metabolism         | UCEC | 0.160856654  |
| UCK1 | Riboflavin metabolism      | UCEC | 0.131054217  |
| UCK1 | Schmahl_pdgf_signaling     | UCEC | -0.336704331 |
| UCK1 | Selenocompound metabol     | UCEC | -0.186546994 |
| UCK1 | Signaling_by_hippo         | UCEC | -0.468191715 |
| UCK1 | Sphingolipid metabolism    | UCEC | -0.277720334 |
| UCK1 | Starch and sucrose metabo  | UCEC | -0.025442336 |
| UCK1 | Steroid biosynthesis       | UCEC | 0.116018866  |
| UCK1 | Steroid hormone biosynth   | UCEC | 0.146993239  |
| UCK1 | Sulfur metabolism          | UCEC | -0.149396336 |
| UCK1 | Synthesis and degradation  | UCEC | 0.103854847  |
| UCK1 | T helper cell              | UCEC | 0.059196249  |
| UCK1 | T helper1 (th1) cell       | UCEC | 0.061436941  |
| UCK1 | T helper17 (th17) cell     | UCEC | -0.023031108 |
| UCK1 | T helper2 (th2) cell       | UCEC | 0.105629405  |
| UCK1 | T helper9 (th9) cell       | UCEC | 0.098334462  |
| UCK1 | Taurine and hypotaurine r  | UCEC | 0.198293667  |
| UCK1 | Terpenoid backbone biosy   | UCEC | -0.036882495 |
| UCK1 | Tgf_beta_signaling_pathw   | UCEC | -0.301480536 |
| UCK1 | Thiamine metabolism        | UCEC | 0.132161675  |
| UCK1 | Tnfa_signaling_via_nfkb    | UCEC | -0.157483397 |
| UCK1 | Tryptophan metabolism      | UCEC | 0.143345637  |
| UCK1 | Tumor endothelial cell     | UCEC | 0.077013196  |
| UCK1 | Tyrosine metabolism        | UCEC | 0.31984472   |
| UCK1 | Ubiquinone and other terp  | UCEC | 0.162250813  |
| UCK1 | Valine, leucine and isoleu | UCEC | 0.118359461  |
| UCK1 | Valine, leucine and isoleu | UCEC | -0.030026477 |
| UCK1 | Vascular endothelial cell  | UCEC | 0.010950629  |
| UCK1 | Vascular smooth muscle c   | UCEC | 0.089892814  |
| UCK1 | Vegf_signaling_pathway     | UCEC | 0.088272358  |
| UCK1 | Vitamin b6 metabolism      | UCEC | 0.095025843  |
| UCK1 | Willert_wnt_signaling      | UCEC | 0.059122034  |
| UCK1 | Wnt_beta_catenin_signali   | UCEC | 0.025908171  |
| UCK2 | Abnormal plasma cell       | UCEC | 0.197952006  |
| UCK2 | Activated b cell           | UCEC | 0.107654203  |
| UCK2 | Activated cd4+ t cell      | UCEC | -0.0443073   |
| UCK2 | Activated t cell           | UCEC | 0.061925384  |

|      |                            |      |              |
|------|----------------------------|------|--------------|
| UCK2 | Alanine, aspartate and glu | UCEC | 0.314528373  |
| UCK2 | Alcala_apoptosis           | UCEC | 0.313051539  |
| UCK2 | Alpha-linolenic acid meta  | UCEC | 0.064498334  |
| UCK2 | Amino sugar and nucleoti   | UCEC | 0.191892581  |
| UCK2 | Ampk_pathway               | UCEC | 0.225746333  |
| UCK2 | Angiogenesis               | UCEC | 0.050487546  |
| UCK2 | Arachidonic acid metabol   | UCEC | 0.110502404  |
| UCK2 | Arginine and proline meta  | UCEC | 0.24117268   |
| UCK2 | Arginine biosynthesis      | UCEC | 0.229059551  |
| UCK2 | Ascorbate and aldarate me  | UCEC | 0.049242972  |
| UCK2 | Atypical memory b cell     | UCEC | -0.003317458 |
| UCK2 | Axl+siglec6+ dendritic ce  | UCEC | -0.077165604 |
| UCK2 | B cell                     | UCEC | 0.037023511  |
| UCK2 | B1 cell                    | UCEC | 0.116184009  |
| UCK2 | Basal cell                 | UCEC | 0.086285032  |
| UCK2 | Beta-alanine metabolism    | UCEC | 0.076252485  |
| UCK2 | Biosynthesis of unsaturate | UCEC | 0.170921407  |
| UCK2 | Biotin metabolism          | UCEC | 0.111667119  |
| UCK2 | Butanoate metabolism       | UCEC | 0.073449957  |
| UCK2 | Caffeine metabolism        | UCEC | 0.075341964  |
| UCK2 | Cancer stem cell           | UCEC | 0.014148027  |
| UCK2 | Cancer stem-like cell      | UCEC | -0.074015195 |
| UCK2 | Cd4+ cytotoxic t cell      | UCEC | -0.056677466 |
| UCK2 | Cd4+ memory t cell         | UCEC | 0.022846519  |
| UCK2 | Cd4+ regulatory t cell     | UCEC | -0.035922051 |
| UCK2 | Cd4+ t helper cell         | UCEC | -0.058070893 |
| UCK2 | Cd4+cd25+ regulatory t c   | UCEC | -0.036264619 |
| UCK2 | Cd8+ cytotoxic t cell      | UCEC | 0.075634547  |
| UCK2 | Cd8+ regulatory t cell     | UCEC | 0.106887927  |
| UCK2 | Cell_cycle                 | UCEC | 0.221290699  |
| UCK2 | Chandran_metastasis_top5   | UCEC | 0.100384009  |
| UCK2 | Citrate cycle (tca cycle)  | UCEC | 0.190675901  |
| UCK2 | Cysteine and methionine r  | UCEC | 0.298683924  |
| UCK2 | Cytokine induced killer cε | UCEC | 0.126203245  |
| UCK2 | D-arginine and d-ornithin  | UCEC | -0.183978552 |
| UCK2 | D-glutamine and d-glutan   | UCEC | 0.086721153  |
| UCK2 | Dendritic cell             | UCEC | -0.000476998 |
| UCK2 | Dna_repair                 | UCEC | 0.335717129  |
| UCK2 | Dna_replication            | UCEC | 0.302159721  |
| UCK2 | Double-negative memory     | UCEC | 0.002320322  |
| UCK2 | Drug metabolism - cytoch   | UCEC | -0.02285958  |
| UCK2 | Drug metabolism - other (  | UCEC | 0.323896762  |
| UCK2 | E2f_targets                | UCEC | 0.254837445  |

|      |                              |        |              |
|------|------------------------------|--------|--------------|
| UCK2 | Ecm_receptor_interaction     | UCEC   | 0.059236384  |
| UCK2 | Effector cd4+ memory t       | ( UCEC | -0.064031126 |
| UCK2 | Effector cd8+ memory t       | ( UCEC | -0.012185041 |
| UCK2 | Effector memory t cell       | UCEC   | -0.029451405 |
| UCK2 | Effector regulatory t (treg  | UCEC   | -0.036560515 |
| UCK2 | Elvidge_hif1a_targets_up     | UCEC   | 0.238610291  |
| UCK2 | Endothelial cell             | UCEC   | -0.001095065 |
| UCK2 | Eosinophil                   | UCEC   | 0.009666019  |
| UCK2 | Ether lipid metabolism       | UCEC   | 0.055756169  |
| UCK2 | Exhausted cd4+ t cell        | UCEC   | 0.032265118  |
| UCK2 | Exhausted cd8+ t cell        | UCEC   | 0.030397513  |
| UCK2 | Exhausted t cell             | UCEC   | 0.057282067  |
| UCK2 | Fat cell (adipocyte)         | UCEC   | 0.385618499  |
| UCK2 | Fatty acid biosynthesis      | UCEC   | 0.129656792  |
| UCK2 | Fatty acid degradation       | UCEC   | 0.123283921  |
| UCK2 | Fatty acid elongation        | UCEC   | 0.310168561  |
| UCK2 | Fibroblast                   | UCEC   | -0.107478353 |
| UCK2 | Folate biosynthesis          | UCEC   | 0.277936505  |
| UCK2 | Follicular b cell            | UCEC   | 0.019099311  |
| UCK2 | Follicular dendritic cell    | UCEC   | 0.001737618  |
| UCK2 | Follicular helper (tfh) t ce | UCEC   | 0.025350002  |
| UCK2 | Follicular t cell            | UCEC   | 0.149947848  |
| UCK2 | Foxp3+il-17+ t cell          | UCEC   | 0.103321263  |
| UCK2 | Fructose and mannose me      | UCEC   | 0.180131226  |
| UCK2 | G2m_checkpoint               | UCEC   | 0.200573643  |
| UCK2 | Galactose metabolism         | UCEC   | 0.229224443  |
| UCK2 | Galie_tumor_stemness_ge      | UCEC   | -0.077060673 |
| UCK2 | Glutathione metabolism       | UCEC   | 0.233340629  |
| UCK2 | Glycerolipid metabolism      | UCEC   | 0.198474306  |
| UCK2 | Glycerophospholipid metæ     | UCEC   | 0.139958556  |
| UCK2 | Glycine, serine and threor   | UCEC   | 0.207772162  |
| UCK2 | Glycolysis / gluconeogene    | UCEC   | 0.242063938  |
| UCK2 | Glycosaminoglycan biosy      | UCEC   | 0.21975444   |
| UCK2 | Glycosaminoglycan biosy      | UCEC   | 0.098467348  |
| UCK2 | Glycosaminoglycan biosy      | UCEC   | 0.08813643   |
| UCK2 | Glycosaminoglycan degra      | UCEC   | 0.085464426  |
| UCK2 | Glycosphingolipid biosyn     | UCEC   | 0.099566313  |
| UCK2 | Glycosphingolipid biosyn     | UCEC   | 0.106066584  |
| UCK2 | Glycosphingolipid biosyn     | UCEC   | 0.123250709  |
| UCK2 | Glycosylphosphatidylinos     | UCEC   | 0.065912422  |
| UCK2 | Glyoxylate and dicarboxy     | UCEC   | 0.293562464  |
| UCK2 | Granulocyte                  | UCEC   | 0.011266954  |
| UCK2 | Hedgehog_signaling           | UCEC   | -0.030274702 |

|      |                             |      |              |
|------|-----------------------------|------|--------------|
| UCK2 | Histidine metabolism        | UCEC | 0.153768795  |
| UCK2 | Hypoxia                     | UCEC | 0.159552814  |
| UCK2 | Il-17alpha t cell           | UCEC | 0.018318193  |
| UCK2 | Il2_stat5_signaling         | UCEC | 0.087293558  |
| UCK2 | Il6_jak_stat3_signaling     | UCEC | -0.031368768 |
| UCK2 | Immune_checkpoints_tun      | UCEC | -0.019385139 |
| UCK2 | Immune_inhibition_cytok     | UCEC | -0.13140116  |
| UCK2 | Inositol phosphate metabo   | UCEC | -0.076411752 |
| UCK2 | Interleukin_6_signaling     | UCEC | -0.085354515 |
| UCK2 | Jaeger_metastasis_up        | UCEC | 0.240453809  |
| UCK2 | Jain_nfkb_signaling         | UCEC | 0.432312576  |
| UCK2 | Kras_signaling_up           | UCEC | 0.049453403  |
| UCK2 | Linoleic acid metabolism    | UCEC | 0.112867234  |
| UCK2 | Lipoic acid metabolism      | UCEC | 0.080005087  |
| UCK2 | Lysine degradation          | UCEC | 0.18636152   |
| UCK2 | Lysosome                    | UCEC | 0.106631997  |
| UCK2 | M1 macrophage               | UCEC | 0.081859401  |
| UCK2 | M2 macrophage               | UCEC | 0.082979687  |
| UCK2 | Mannose type o-glycan bi    | UCEC | 0.290548991  |
| UCK2 | Mapk_signaling_pathway      | UCEC | 0.0320631    |
| UCK2 | Mapk3_erk1_activation       | UCEC | -0.100604898 |
| UCK2 | Marginal zone b cell        | UCEC | 0.001920429  |
| UCK2 | Memory b cell               | UCEC | 0.035464416  |
| UCK2 | Mesenchymal cell            | UCEC | -0.030352865 |
| UCK2 | Mesenchymal stem cell       | UCEC | -0.117578445 |
| UCK2 | Metabolism of xenobiotic    | UCEC | 0.045401372  |
| UCK2 | Migrating cancer stem cel   | UCEC | 0.06582193   |
| UCK2 | Mitotic_spindle             | UCEC | 0.006340453  |
| UCK2 | Monocyte                    | UCEC | 0.024395567  |
| UCK2 | Mtor_signaling_pathway      | UCEC | -0.049708222 |
| UCK2 | Mtorc1_signaling            | UCEC | 0.289627709  |
| UCK2 | Mucin type o-glycan biosy   | UCEC | -0.01758674  |
| UCK2 | Myc_targets_v1              | UCEC | 0.354917903  |
| UCK2 | Myeloid cell                | UCEC | 0.022964166  |
| UCK2 | N-glycan biosynthesis       | UCEC | 0.092222846  |
| UCK2 | Naive b cell                | UCEC | 0.013911871  |
| UCK2 | Naive cd4+ t cell           | UCEC | -0.02551797  |
| UCK2 | Naive cd8+ t cell           | UCEC | 0.075203411  |
| UCK2 | Natural killer cell         | UCEC | 0.064498996  |
| UCK2 | Natural killer t (nkt) cell | UCEC | 0.173381804  |
| UCK2 | Natural regulatory t (treg) | UCEC | -0.122160164 |
| UCK2 | Neomycin, kanamycin an      | UCEC | 0.176000127  |
| UCK2 | Neutrophil                  | UCEC | 0.090105746  |

|      |                            |      |              |
|------|----------------------------|------|--------------|
| UCK2 | Nicotinate and nicotinami  | UCEC | 0.226112541  |
| UCK2 | Nitrogen metabolism        | UCEC | 0.182006847  |
| UCK2 | Nod_like_receptor_signal   | UCEC | 0.017775397  |
| UCK2 | Notch_signaling            | UCEC | 0.042573933  |
| UCK2 | One carbon pool by folate  | UCEC | 0.346568958  |
| UCK2 | Other glycan degradation   | UCEC | 0.208639216  |
| UCK2 | Other types of o-glycan b  | UCEC | 0.209220089  |
| UCK2 | Oxidative phosphorylatio   | UCEC | 0.28062634   |
| UCK2 | P53_pathway                | UCEC | 0.173275018  |
| UCK2 | P53_signaling_pathway      | UCEC | 0.091852649  |
| UCK2 | Pantothenate and coa bios  | UCEC | 0.029528692  |
| UCK2 | Pentose and glucuronate i  | UCEC | 0.069283492  |
| UCK2 | Pentose phosphate pathwa   | UCEC | 0.180147277  |
| UCK2 | Pericyte                   | UCEC | -0.028680457 |
| UCK2 | Phenylalanine metabolism   | UCEC | 0.073518526  |
| UCK2 | Phenylalanine, tyrosine ar | UCEC | 0.181386252  |
| UCK2 | Phosphonate and phosphir   | UCEC | -0.030920382 |
| UCK2 | Pi3k_akt_activation        | UCEC | -0.091023343 |
| UCK2 | Pi3k_akt_mtor_signaling    | UCEC | 0.108771299  |
| UCK2 | Porphyrin and chlorophyl   | UCEC | 0.181615866  |
| UCK2 | Primary bile acid biosynt  | UCEC | 0.083788148  |
| UCK2 | Propanoate metabolism      | UCEC | 0.199124869  |
| UCK2 | Purine metabolism          | UCEC | 0.471192968  |
| UCK2 | Pyrimidine metabolism      | UCEC | 0.450122645  |
| UCK2 | Pyruvate metabolism        | UCEC | 0.332372669  |
| UCK2 | Regulation_of_autophagy    | UCEC | -0.286976875 |
| UCK2 | Retinol metabolism         | UCEC | 0.054318794  |
| UCK2 | Riboflavin metabolism      | UCEC | 0.265427757  |
| UCK2 | Schmahl_pdgf_signaling     | UCEC | -0.197184436 |
| UCK2 | Selenocompound metabol     | UCEC | 0.263281553  |
| UCK2 | Signaling_by_hippo         | UCEC | -0.06940943  |
| UCK2 | Sphingolipid metabolism    | UCEC | -0.041070035 |
| UCK2 | Starch and sucrose metabo  | UCEC | 0.003292936  |
| UCK2 | Steroid biosynthesis       | UCEC | 0.350150821  |
| UCK2 | Steroid hormone biosynth   | UCEC | 0.034184515  |
| UCK2 | Sulfur metabolism          | UCEC | 0.012550068  |
| UCK2 | Synthesis and degradation  | UCEC | 0.212196114  |
| UCK2 | T helper cell              | UCEC | -0.017820503 |
| UCK2 | T helper1 (th1) cell       | UCEC | 0.044550567  |
| UCK2 | T helper17 (th17) cell     | UCEC | -0.020585526 |
| UCK2 | T helper2 (th2) cell       | UCEC | 0.000428589  |
| UCK2 | T helper9 (th9) cell       | UCEC | -0.101828401 |
| UCK2 | Taurine and hypotaurine r  | UCEC | 0.172884777  |

|       |                            |      |              |
|-------|----------------------------|------|--------------|
| UCK2  | Terpenoid backbone biosy   | UCEC | 0.286486796  |
| UCK2  | Tgf_beta_signaling_pathw   | UCEC | 0.030249756  |
| UCK2  | Thiamine metabolism        | UCEC | 0.078943588  |
| UCK2  | Tnfa_signaling_via_nfk     | UCEC | 0.037732215  |
| UCK2  | Tryptophan metabolism      | UCEC | 0.295013973  |
| UCK2  | Tumor endothelial cell     | UCEC | 0.256211088  |
| UCK2  | Tyrosine metabolism        | UCEC | 0.063545677  |
| UCK2  | Ubiquinone and other ter   | UCEC | 0.211633023  |
| UCK2  | Valine, leucine and isoleu | UCEC | 0.106583078  |
| UCK2  | Valine, leucine and isoleu | UCEC | 0.165596651  |
| UCK2  | Vascular endothelial cell  | UCEC | -0.023716043 |
| UCK2  | Vascular smooth muscle c   | UCEC | -0.093998507 |
| UCK2  | Vegf_signaling_pathway     | UCEC | -0.038013463 |
| UCK2  | Vitamin b6 metabolism      | UCEC | 0.214045322  |
| UCK2  | Willert_wnt_signaling      | UCEC | 0.222238581  |
| UCK2  | Wnt_beta_catenin_signali   | UCEC | 0.163998523  |
| UCKL1 | Abnormal plasma cell       | UCEC | 0.008290891  |
| UCKL1 | Activated b cell           | UCEC | -0.038554089 |
| UCKL1 | Activated cd4+ t cell      | UCEC | -0.066068203 |
| UCKL1 | Activated t cell           | UCEC | -0.013156653 |
| UCKL1 | Alanine, aspartate and glu | UCEC | 0.219346569  |
| UCKL1 | Alcala_apoptosis           | UCEC | 0.147169408  |
| UCKL1 | Alpha-linolenic acid meta  | UCEC | -0.023003906 |
| UCKL1 | Amino sugar and nucleoti   | UCEC | 0.015333583  |
| UCKL1 | Ampk_pathway               | UCEC | 0.378326689  |
| UCKL1 | Angiogenesis               | UCEC | -0.045026726 |
| UCKL1 | Arachidonic acid metabo    | UCEC | 0.198725323  |
| UCKL1 | Arginine and proline met   | UCEC | 0.029269844  |
| UCKL1 | Arginine biosynthesis      | UCEC | 0.30621067   |
| UCKL1 | Ascorbate and aldarate m   | UCEC | -0.205101309 |
| UCKL1 | Atypical memory b cell     | UCEC | 0.000283229  |
| UCKL1 | Axl+siglec6+ dendritic ce  | UCEC | -0.10421651  |
| UCKL1 | B cell                     | UCEC | -0.164842625 |
| UCKL1 | B1 cell                    | UCEC | -0.11765305  |
| UCKL1 | Basal cell                 | UCEC | 0.044162973  |
| UCKL1 | Beta-alanine metabolism    | UCEC | -0.148103365 |
| UCKL1 | Biosynthesis of unsaturate | UCEC | -0.06606403  |
| UCKL1 | Biotin metabolism          | UCEC | -0.120150513 |
| UCKL1 | Butanoate metabolism       | UCEC | -0.056090818 |
| UCKL1 | Caffeine metabolism        | UCEC | -0.072632419 |
| UCKL1 | Cancer stem cell           | UCEC | -0.220968284 |
| UCKL1 | Cancer stem-like cell      | UCEC | -0.271462605 |
| UCKL1 | Cd4+ cytotoxic t cell      | UCEC | -0.010282876 |



|       |                              |      |              |
|-------|------------------------------|------|--------------|
| UCKL1 | Cd4+ memory t cell           | UCEC | 0.051089069  |
| UCKL1 | Cd4+ regulatory t cell       | UCEC | -0.017870563 |
| UCKL1 | Cd4+ t helper cell           | UCEC | -0.079081305 |
| UCKL1 | Cd4+cd25+ regulatory t c     | UCEC | -0.066966183 |
| UCKL1 | Cd8+ cytotoxic t cell        | UCEC | 0.026323885  |
| UCKL1 | Cd8+ regulatory t cell       | UCEC | -0.02267825  |
| UCKL1 | Cell_cycle                   | UCEC | 0.089840881  |
| UCKL1 | Chandran_metastasis_top5     | UCEC | -0.136986025 |
| UCKL1 | Citrate cycle (tca cycle)    | UCEC | 0.146785023  |
| UCKL1 | Cysteine and methionine r    | UCEC | 0.104000805  |
| UCKL1 | Cytokine induced killer c    | UCEC | 0.089917538  |
| UCKL1 | D-arginine and d-ornithin    | UCEC | -0.132481511 |
| UCKL1 | D-glutamine and d-glutan     | UCEC | 0.143281146  |
| UCKL1 | Dendritic cell               | UCEC | 0.051518833  |
| UCKL1 | Dna_repair                   | UCEC | 0.269961592  |
| UCKL1 | Dna_replication              | UCEC | 0.279382549  |
| UCKL1 | Double-negative memory       | UCEC | 0.115882862  |
| UCKL1 | Drug metabolism - cytoch     | UCEC | -0.134948101 |
| UCKL1 | Drug metabolism - other      | UCEC | 0.133560823  |
| UCKL1 | E2f_targets                  | UCEC | 0.141587955  |
| UCKL1 | Ecm_receptor_interaction     | UCEC | 0.126334309  |
| UCKL1 | Effector cd4+ memory t (     | UCEC | -0.127756884 |
| UCKL1 | Effector cd8+ memory t (     | UCEC | 0.047236235  |
| UCKL1 | Effector memory t cell       | UCEC | -0.130489167 |
| UCKL1 | Effector regulatory t (treg  | UCEC | -0.191453834 |
| UCKL1 | Elvidge_hif1a_targets_up     | UCEC | -0.103694187 |
| UCKL1 | Endothelial cell             | UCEC | -0.259306889 |
| UCKL1 | Eosinophil                   | UCEC | -0.026189582 |
| UCKL1 | Ether lipid metabolism       | UCEC | -0.053662705 |
| UCKL1 | Exhausted cd4+ t cell        | UCEC | -0.174791851 |
| UCKL1 | Exhausted cd8+ t cell        | UCEC | -0.13326882  |
| UCKL1 | Exhausted t cell             | UCEC | 0.012982028  |
| UCKL1 | Fat cell (adipocyte)         | UCEC | 0.341692446  |
| UCKL1 | Fatty acid biosynthesis      | UCEC | -0.122637424 |
| UCKL1 | Fatty acid degradation       | UCEC | -0.113635271 |
| UCKL1 | Fatty acid elongation        | UCEC | 0.165119516  |
| UCKL1 | Fibroblast                   | UCEC | -0.21269319  |
| UCKL1 | Folate biosynthesis          | UCEC | -0.031895945 |
| UCKL1 | Follicular b cell            | UCEC | 0.091669617  |
| UCKL1 | Follicular dendritic cell    | UCEC | 0.02593214   |
| UCKL1 | Follicular helper (tfh) t ce | UCEC | -0.047490846 |
| UCKL1 | Follicular t cell            | UCEC | 0.108007286  |
| UCKL1 | Foxp3+il-17+ t cell          | UCEC | 0.1355151    |

|       |                            |      |              |
|-------|----------------------------|------|--------------|
| UCKL1 | Fructose and mannose me    | UCEC | 0.220170852  |
| UCKL1 | G2m_checkpoint             | UCEC | 0.074197661  |
| UCKL1 | Galactose metabolism       | UCEC | 0.291604272  |
| UCKL1 | Galie_tumor_stemness_ge    | UCEC | -0.117537678 |
| UCKL1 | Glutathione metabolism     | UCEC | 0.016873356  |
| UCKL1 | Glycerolipid metabolism    | UCEC | 0.073994365  |
| UCKL1 | Glycerophospholipid metæ   | UCEC | 0.188408619  |
| UCKL1 | Glycine, serine and threor | UCEC | 0.227240139  |
| UCKL1 | Glycolysis / gluconeogene  | UCEC | 0.174650327  |
| UCKL1 | Glycosaminoglycan biosy    | UCEC | 0.339353504  |
| UCKL1 | Glycosaminoglycan biosy    | UCEC | 0.144747962  |
| UCKL1 | Glycosaminoglycan biosy    | UCEC | 0.06226706   |
| UCKL1 | Glycosaminoglycan degra    | UCEC | 0.181600407  |
| UCKL1 | Glycosphingolipid biosyn   | UCEC | 0.205178967  |
| UCKL1 | Glycosphingolipid biosyn   | UCEC | 0.006269152  |
| UCKL1 | Glycosphingolipid biosyn   | UCEC | -0.049788541 |
| UCKL1 | Glycosylphosphatidylinos   | UCEC | -0.087632767 |
| UCKL1 | Glyoxylate and dicarboxy   | UCEC | 0.174909889  |
| UCKL1 | Granulocyte                | UCEC | -0.073217191 |
| UCKL1 | Hedgehog_signaling         | UCEC | 0.047200126  |
| UCKL1 | Histidine metabolism       | UCEC | -0.03207878  |
| UCKL1 | Hypoxia                    | UCEC | 0.040710471  |
| UCKL1 | Il-17ralpha t cell         | UCEC | -0.012265    |
| UCKL1 | Il2_stat5_signaling        | UCEC | -0.047922497 |
| UCKL1 | Il6_jak_stat3_signaling    | UCEC | -0.057033078 |
| UCKL1 | Immune_checkpoints_tunr    | UCEC | -0.023103615 |
| UCKL1 | Immune_inhibition_cytok    | UCEC | -0.149143429 |
| UCKL1 | Inositol phosphate metabo  | UCEC | -0.040702729 |
| UCKL1 | Interleukin_6_signaling    | UCEC | -0.142383192 |
| UCKL1 | Jaeger_metastasis_up       | UCEC | 0.104906478  |
| UCKL1 | Jain_nfkb_signaling        | UCEC | 0.136488891  |
| UCKL1 | Kras_signaling_up          | UCEC | -0.146949283 |
| UCKL1 | Linoleic acid metabolism   | UCEC | 0.014502503  |
| UCKL1 | Lipoic acid metabolism     | UCEC | 0.13525122   |
| UCKL1 | Lysine degradation         | UCEC | 0.091553262  |
| UCKL1 | Lysosome                   | UCEC | 0.158856389  |
| UCKL1 | M1 macrophage              | UCEC | -0.065622804 |
| UCKL1 | M2 macrophage              | UCEC | 0.01424062   |
| UCKL1 | Mannose type o-glycan bi   | UCEC | 0.235497907  |
| UCKL1 | Mapk_signaling_pathway     | UCEC | 0.102567109  |
| UCKL1 | Mapk3_erk1_activation      | UCEC | -0.134200956 |
| UCKL1 | Marginal zone b cell       | UCEC | -0.059476589 |
| UCKL1 | Memory b cell              | UCEC | -0.051792223 |

|       |                             |      |              |
|-------|-----------------------------|------|--------------|
| UCKL1 | Mesenchymal cell            | UCEC | -0.088066078 |
| UCKL1 | Mesenchymal stem cell       | UCEC | -0.257569543 |
| UCKL1 | Metabolism of xenobiotic    | UCEC | -0.015631707 |
| UCKL1 | Migrating cancer stem cel   | UCEC | -0.210501269 |
| UCKL1 | Mitotic_spindle             | UCEC | 0.04486167   |
| UCKL1 | Monocyte                    | UCEC | -0.153807169 |
| UCKL1 | Mtor_signaling_pathway      | UCEC | 0.007625702  |
| UCKL1 | Mtorc1_signaling            | UCEC | -0.090286984 |
| UCKL1 | Mucin type o-glycan biosy   | UCEC | -0.404773642 |
| UCKL1 | Myc_targets_v1              | UCEC | 0.094705332  |
| UCKL1 | Myeloid cell                | UCEC | -0.025063744 |
| UCKL1 | N-glycan biosynthesis       | UCEC | -0.103162289 |
| UCKL1 | Naive b cell                | UCEC | 0.072667773  |
| UCKL1 | Naive cd4+ t cell           | UCEC | -0.096383556 |
| UCKL1 | Naive cd8+ t cell           | UCEC | -0.086857517 |
| UCKL1 | Natural killer cell         | UCEC | -0.023464824 |
| UCKL1 | Natural killer t (nkt) cell | UCEC | -0.231102538 |
| UCKL1 | Natural regulatory t (treg) | UCEC | -0.14861028  |
| UCKL1 | Neomycin, kanamycin and     | UCEC | 0.298360474  |
| UCKL1 | Neutrophil                  | UCEC | -0.152272313 |
| UCKL1 | Nicotinate and nicotinami   | UCEC | -0.13905154  |
| UCKL1 | Nitrogen metabolism         | UCEC | -0.054343161 |
| UCKL1 | Nod_like_receptor_signal    | UCEC | -0.10006947  |
| UCKL1 | Notch_signaling             | UCEC | 0.140979156  |
| UCKL1 | One carbon pool by folate   | UCEC | 0.146235257  |
| UCKL1 | Other glycan degradation    | UCEC | 0.135595397  |
| UCKL1 | Other types of o-glycan b   | UCEC | 0.392443824  |
| UCKL1 | Oxidative phosphorylatio    | UCEC | 0.173097688  |
| UCKL1 | P53_pathway                 | UCEC | 0.026291829  |
| UCKL1 | P53_signaling_pathway       | UCEC | -0.336537288 |
| UCKL1 | Pantothenate and coa bios   | UCEC | -0.152420867 |
| UCKL1 | Pentose and glucuronate i   | UCEC | -0.069076451 |
| UCKL1 | Pentose phosphate pathwa    | UCEC | 0.222199772  |
| UCKL1 | Pericyte                    | UCEC | -0.204679033 |
| UCKL1 | Phenylalanine metabolism    | UCEC | 0.116157201  |
| UCKL1 | Phenylalanine, tyrosine ar  | UCEC | 0.101775873  |
| UCKL1 | Phosphonate and phosphir    | UCEC | 0.00285273   |
| UCKL1 | Pi3k_akt_activation         | UCEC | -0.046699918 |
| UCKL1 | Pi3k_akt_mtor_signaling     | UCEC | -0.11480155  |
| UCKL1 | Porphyrin and chlorophyl    | UCEC | 0.070684805  |
| UCKL1 | Primary bile acid biosynt   | UCEC | 0.0226569    |
| UCKL1 | Propanoate metabolism       | UCEC | -0.002080247 |
| UCKL1 | Purine metabolism           | UCEC | 0.270843671  |

|       |                            |      |              |
|-------|----------------------------|------|--------------|
| UCKL1 | Pyrimidine metabolism      | UCEC | 0.274688246  |
| UCKL1 | Pyruvate metabolism        | UCEC | 0.163654964  |
| UCKL1 | Regulation_of_autophagy    | UCEC | -0.234875657 |
| UCKL1 | Retinol metabolism         | UCEC | -0.004706241 |
| UCKL1 | Riboflavin metabolism      | UCEC | 0.011533831  |
| UCKL1 | Schmahl_pdgf_signaling     | UCEC | -0.392005996 |
| UCKL1 | Selenocompound metabol     | UCEC | -0.033728048 |
| UCKL1 | Signaling_by_hippo         | UCEC | -0.161985691 |
| UCKL1 | Sphingolipid metabolism    | UCEC | -0.1471431   |
| UCKL1 | Starch and sucrose metabo  | UCEC | -0.077999997 |
| UCKL1 | Steroid biosynthesis       | UCEC | 0.07108921   |
| UCKL1 | Steroid hormone biosynth   | UCEC | -0.092143086 |
| UCKL1 | Sulfur metabolism          | UCEC | -0.206921755 |
| UCKL1 | Synthesis and degradation  | UCEC | 0.134770581  |
| UCKL1 | T helper cell              | UCEC | -0.102950665 |
| UCKL1 | T helper1 (th1) cell       | UCEC | -0.039138171 |
| UCKL1 | T helper17 (th17) cell     | UCEC | -0.209069526 |
| UCKL1 | T helper2 (th2) cell       | UCEC | -0.107410075 |
| UCKL1 | T helper9 (th9) cell       | UCEC | -0.07522073  |
| UCKL1 | Taurine and hypotaurine r  | UCEC | 0.087974459  |
| UCKL1 | Terpenoid backbone biosy   | UCEC | -0.041160814 |
| UCKL1 | Tgf_beta_signaling_pathw   | UCEC | -0.048663148 |
| UCKL1 | Thiamine metabolism        | UCEC | 0.144524632  |
| UCKL1 | Tnfa_signaling_via_nfkb    | UCEC | -0.147860569 |
| UCKL1 | Tryptophan metabolism      | UCEC | -0.001194229 |
| UCKL1 | Tumor endothelial cell     | UCEC | 0.124628483  |
| UCKL1 | Tyrosine metabolism        | UCEC | 0.063175207  |
| UCKL1 | Ubiquinone and other terp  | UCEC | 0.136031027  |
| UCKL1 | Valine, leucine and isoleu | UCEC | 0.094715239  |
| UCKL1 | Valine, leucine and isoleu | UCEC | -0.02690112  |
| UCKL1 | Vascular endothelial cell  | UCEC | -0.032466286 |
| UCKL1 | Vascular smooth muscle c   | UCEC | -0.100113285 |
| UCKL1 | Vegf_signaling_pathway     | UCEC | 0.019087651  |
| UCKL1 | Vitamin b6 metabolism      | UCEC | 0.221777792  |
| UCKL1 | Willert_wnt_signaling      | UCEC | -0.116906668 |
| UCKL1 | Wnt_beta_catenin_signali   | UCEC | 0.111175199  |
| UPP1  | Abnormal plasma cell       | UCEC | 0.299624399  |
| UPP1  | Activated b cell           | UCEC | 0.209748981  |
| UPP1  | Activated cd4+ t cell      | UCEC | 0.250789269  |
| UPP1  | Activated t cell           | UCEC | 0.309586597  |
| UPP1  | Alanine, aspartate and glu | UCEC | 0.22433225   |
| UPP1  | Alcala_apoptosis           | UCEC | 0.271436499  |
| UPP1  | Alpha-linolenic acid meta  | UCEC | 0.143943117  |

|      |                                      |      |              |
|------|--------------------------------------|------|--------------|
| UPP1 | Amino sugar and nucleoti             | UCEC | 0.276926872  |
| UPP1 | Ampk_pathway                         | UCEC | 0.046747715  |
| UPP1 | Angiogenesis                         | UCEC | 0.347061122  |
| UPP1 | Arachidonic acid metabol             | UCEC | 0.401494021  |
| UPP1 | Arginine and proline metε            | UCEC | 0.22759586   |
| UPP1 | Arginine biosynthesis                | UCEC | 0.364613818  |
| UPP1 | Ascorbate and aldarate mε            | UCEC | 0.10134551   |
| UPP1 | Atypical memory b cell               | UCEC | 0.159429825  |
| UPP1 | Axl+siglec6+ dendritic ce            | UCEC | 0.390592462  |
| UPP1 | B cell                               | UCEC | 0.256139197  |
| UPP1 | B1 cell                              | UCEC | 0.110162484  |
| UPP1 | Basal cell                           | UCEC | 0.369509172  |
| UPP1 | Beta-alanine metabolism              | UCEC | 0.075493261  |
| UPP1 | Biosynthesis of unsaturate           | UCEC | 0.104854179  |
| UPP1 | Biotin metabolism                    | UCEC | -0.097002632 |
| UPP1 | Butanoate metabolism                 | UCEC | -0.048007932 |
| UPP1 | Caffeine metabolism                  | UCEC | 0.165385571  |
| UPP1 | Cancer stem cell                     | UCEC | 0.194598304  |
| UPP1 | Cancer stem-like cell                | UCEC | 0.065449494  |
| UPP1 | Cd4+ cytotoxic t cell                | UCEC | 0.373441052  |
| UPP1 | Cd4+ memory t cell                   | UCEC | 0.271701465  |
| UPP1 | Cd4+ regulatory t cell               | UCEC | 0.195910901  |
| UPP1 | Cd4+ t helper cell                   | UCEC | 0.229562267  |
| UPP1 | Cd4+cd25+ regulatory t c             | UCEC | 0.237035952  |
| UPP1 | Cd8+ cytotoxic t cell                | UCEC | 0.361735049  |
| UPP1 | Cd8+ regulatory t cell               | UCEC | 0.259982326  |
| UPP1 | Cell_cycle                           | UCEC | -0.036990002 |
| UPP1 | Chandran_metastasis_top <sup>5</sup> | UCEC | -0.256851686 |
| UPP1 | Citrate cycle (tca cycle)            | UCEC | 0.068788034  |
| UPP1 | Cysteine and methionine r            | UCEC | 0.1081109    |
| UPP1 | Cytokine induced killer cε           | UCEC | 0.320736882  |
| UPP1 | D-arginine and d-ornithin            | UCEC | -0.016083173 |
| UPP1 | D-glutamine and d-glutan             | UCEC | 0.139875226  |
| UPP1 | Dendritic cell                       | UCEC | 0.37388074   |
| UPP1 | Dna_repair                           | UCEC | 0.153898784  |
| UPP1 | Dna_replication                      | UCEC | 0.053864076  |
| UPP1 | Double-negative memory               | UCEC | 0.256115182  |
| UPP1 | Drug metabolism - cytoch             | UCEC | 0.118862373  |
| UPP1 | Drug metabolism - other ε            | UCEC | 0.375462811  |
| UPP1 | E2f_targets                          | UCEC | -0.025918877 |
| UPP1 | Ecm_receptor_interaction             | UCEC | 0.289470347  |
| UPP1 | Effector cd4+ memory t (             | UCEC | 0.156903108  |
| UPP1 | Effector cd8+ memory t (             | UCEC | 0.377814592  |

|      |                              |      |              |
|------|------------------------------|------|--------------|
| UPP1 | Effector memory t cell       | UCEC | 0.231239747  |
| UPP1 | Effector regulatory t (treg  | UCEC | 0.156372537  |
| UPP1 | Elvidge_hif1a_targets_up     | UCEC | -0.063072314 |
| UPP1 | Endothelial cell             | UCEC | 0.073760037  |
| UPP1 | Eosinophil                   | UCEC | 0.376759651  |
| UPP1 | Ether lipid metabolism       | UCEC | 0.227467535  |
| UPP1 | Exhausted cd4+ t cell        | UCEC | 0.290478945  |
| UPP1 | Exhausted cd8+ t cell        | UCEC | 0.320781766  |
| UPP1 | Exhausted t cell             | UCEC | 0.290293573  |
| UPP1 | Fat cell (adipocyte)         | UCEC | 0.061562338  |
| UPP1 | Fatty acid biosynthesis      | UCEC | 0.016837176  |
| UPP1 | Fatty acid degradation       | UCEC | -0.015230676 |
| UPP1 | Fatty acid elongation        | UCEC | 0.157173749  |
| UPP1 | Fibroblast                   | UCEC | 0.134951966  |
| UPP1 | Folate biosynthesis          | UCEC | 0.126883117  |
| UPP1 | Follicular b cell            | UCEC | 0.319181681  |
| UPP1 | Follicular dendritic cell    | UCEC | 0.118192758  |
| UPP1 | Follicular helper (tfh) t ce | UCEC | 0.30915519   |
| UPP1 | Follicular t cell            | UCEC | 0.303489121  |
| UPP1 | Foxp3+il-17+ t cell          | UCEC | 0.167063191  |
| UPP1 | Fructose and mannose me      | UCEC | 0.302188107  |
| UPP1 | G2m_checkpoint               | UCEC | -0.067420376 |
| UPP1 | Galactose metabolism         | UCEC | 0.377846977  |
| UPP1 | Galie_tumor_stemness_ge      | UCEC | -0.013002986 |
| UPP1 | Glutathione metabolism       | UCEC | 0.251447793  |
| UPP1 | Glycerolipid metabolism      | UCEC | 0.204029708  |
| UPP1 | Glycerophospholipid metæ     | UCEC | 0.335223987  |
| UPP1 | Glycine, serine and threor   | UCEC | 0.256261866  |
| UPP1 | Glycolysis / gluconeogene    | UCEC | 0.230810107  |
| UPP1 | Glycosaminoglycan biosy      | UCEC | 0.284061347  |
| UPP1 | Glycosaminoglycan biosy      | UCEC | -0.103165264 |
| UPP1 | Glycosaminoglycan biosy      | UCEC | 0.273620106  |
| UPP1 | Glycosaminoglycan degra      | UCEC | 0.211577873  |
| UPP1 | Glycosphingolipid biosyn     | UCEC | 0.269987578  |
| UPP1 | Glycosphingolipid biosyn     | UCEC | 0.387190771  |
| UPP1 | Glycosphingolipid biosyn     | UCEC | 0.285005099  |
| UPP1 | Glycosylphosphatidylinos     | UCEC | -0.19169714  |
| UPP1 | Glyoxylate and dicarboxy     | UCEC | 0.102893753  |
| UPP1 | Granulocyte                  | UCEC | 0.274494971  |
| UPP1 | Hedgehog_signaling           | UCEC | -0.054427341 |
| UPP1 | Histidine metabolism         | UCEC | 0.122508362  |
| UPP1 | Hypoxia                      | UCEC | 0.412818904  |
| UPP1 | Il-17ralpha t cell           | UCEC | 0.274297289  |

|      |                             |      |              |
|------|-----------------------------|------|--------------|
| UPP1 | Il2_stat5_signaling         | UCEC | 0.512308709  |
| UPP1 | Il6_jak_stat3_signaling     | UCEC | 0.456961119  |
| UPP1 | Immune_checkpoints_tun      | UCEC | 0.3353122    |
| UPP1 | Immune_inhibition_cytok     | UCEC | 0.402676295  |
| UPP1 | Inositol phosphate metabo   | UCEC | -0.030895599 |
| UPP1 | Interleukin_6_signaling     | UCEC | 0.1719894    |
| UPP1 | Jaeger_metastasis_up        | UCEC | 0.187064602  |
| UPP1 | Jain_nfkb_signaling         | UCEC | 0.012921256  |
| UPP1 | Kras_signaling_up           | UCEC | 0.387068129  |
| UPP1 | Linoleic acid metabolism    | UCEC | 0.151444234  |
| UPP1 | Lipoic acid metabolism      | UCEC | -0.125563734 |
| UPP1 | Lysine degradation          | UCEC | -0.188445816 |
| UPP1 | Lysosome                    | UCEC | 0.306192672  |
| UPP1 | M1 macrophage               | UCEC | 0.307464655  |
| UPP1 | M2 macrophage               | UCEC | 0.302672149  |
| UPP1 | Mannose type o-glycan bi    | UCEC | 0.043208727  |
| UPP1 | Mapk_signaling_pathway      | UCEC | 0.354653013  |
| UPP1 | Mapk3_erk1_activation       | UCEC | 0.123725317  |
| UPP1 | Marginal zone b cell        | UCEC | 0.159204681  |
| UPP1 | Memory b cell               | UCEC | 0.222493088  |
| UPP1 | Mesenchymal cell            | UCEC | 0.119544979  |
| UPP1 | Mesenchymal stem cell       | UCEC | 0.236899081  |
| UPP1 | Metabolism of xenobiotic    | UCEC | 0.242439878  |
| UPP1 | Migrating cancer stem cel   | UCEC | 0.158749542  |
| UPP1 | Mitotic_spindle             | UCEC | -0.076146187 |
| UPP1 | Monocyte                    | UCEC | 0.445228924  |
| UPP1 | Mtor_signaling_pathway      | UCEC | 0.074858013  |
| UPP1 | Mtorc1_signaling            | UCEC | 0.179474204  |
| UPP1 | Mucin type o-glycan biosy   | UCEC | 0.006201456  |
| UPP1 | Myc_targets_v1              | UCEC | 0.027381495  |
| UPP1 | Myeloid cell                | UCEC | 0.2971705    |
| UPP1 | N-glycan biosynthesis       | UCEC | -0.034803866 |
| UPP1 | Naive b cell                | UCEC | 0.281024442  |
| UPP1 | Naive cd4+ t cell           | UCEC | 0.120402792  |
| UPP1 | Naive cd8+ t cell           | UCEC | -0.049375769 |
| UPP1 | Natural killer cell         | UCEC | 0.341349508  |
| UPP1 | Natural killer t (nkt) cell | UCEC | 0.122102084  |
| UPP1 | Natural regulatory t (treg) | UCEC | 0.209761529  |
| UPP1 | Neomycin, kanamycin an      | UCEC | 0.337146581  |
| UPP1 | Neutrophil                  | UCEC | 0.432481975  |
| UPP1 | Nicotinate and nicotinami   | UCEC | 0.237409425  |
| UPP1 | Nitrogen metabolism         | UCEC | 0.110913915  |
| UPP1 | Nod_like_receptor_signal    | UCEC | 0.380822526  |

|      |                            |      |              |
|------|----------------------------|------|--------------|
| UPP1 | Notch_signaling            | UCEC | 0.16163833   |
| UPP1 | One carbon pool by folate  | UCEC | 0.103887863  |
| UPP1 | Other glycan degradation   | UCEC | 0.204558488  |
| UPP1 | Other types of o-glycan b  | UCEC | 0.096590085  |
| UPP1 | Oxidative phosphorylatior  | UCEC | 0.276672304  |
| UPP1 | P53_pathway                | UCEC | 0.51720228   |
| UPP1 | P53_signaling_pathway      | UCEC | 0.097908395  |
| UPP1 | Pantothenate and coa bios  | UCEC | 0.181833934  |
| UPP1 | Pentose and glucuronate i  | UCEC | 0.188759763  |
| UPP1 | Pentose phosphate pathwa   | UCEC | 0.276433369  |
| UPP1 | Pericyte                   | UCEC | 0.170048492  |
| UPP1 | Phenylalanine metabolism   | UCEC | 0.312819179  |
| UPP1 | Phenylalanine, tyrosine ar | UCEC | 0.254811869  |
| UPP1 | Phosphonate and phosphir   | UCEC | -0.119268206 |
| UPP1 | Pi3k_akt_activation        | UCEC | -0.18815981  |
| UPP1 | Pi3k_akt_mtor_signaling    | UCEC | 0.296624698  |
| UPP1 | Porphyrin and chlorophyl   | UCEC | 0.293086757  |
| UPP1 | Primary bile acid biosynt  | UCEC | 0.162824447  |
| UPP1 | Propanoate metabolism      | UCEC | -0.094323216 |
| UPP1 | Purine metabolism          | UCEC | 0.139342108  |
| UPP1 | Pyrimidine metabolism      | UCEC | 0.152321754  |
| UPP1 | Pyruvate metabolism        | UCEC | 0.094258362  |
| UPP1 | Regulation_of_autophagy    | UCEC | -0.063373172 |
| UPP1 | Retinol metabolism         | UCEC | 0.249671837  |
| UPP1 | Riboflavin metabolism      | UCEC | 0.277791437  |
| UPP1 | Schmahl_pdgf_signaling     | UCEC | -0.022521989 |
| UPP1 | Selenocompound metabol     | UCEC | -0.103313819 |
| UPP1 | Signaling_by_hippo         | UCEC | -0.107579355 |
| UPP1 | Sphingolipid metabolism    | UCEC | 0.09269572   |
| UPP1 | Starch and sucrose metabo  | UCEC | 0.209586163  |
| UPP1 | Steroid biosynthesis       | UCEC | 0.050282666  |
| UPP1 | Steroid hormone biosynth   | UCEC | 0.193678433  |
| UPP1 | Sulfur metabolism          | UCEC | 0.080347527  |
| UPP1 | Synthesis and degradation  | UCEC | 0.038215392  |
| UPP1 | T helper cell              | UCEC | 0.30004779   |
| UPP1 | T helper1 (th1) cell       | UCEC | 0.356722572  |
| UPP1 | T helper17 (th17) cell     | UCEC | 0.361858503  |
| UPP1 | T helper2 (th2) cell       | UCEC | 0.330851302  |
| UPP1 | T helper9 (th9) cell       | UCEC | 0.254210813  |
| UPP1 | Taurine and hypotaurine r  | UCEC | 0.064360437  |
| UPP1 | Terpenoid backbone biosy   | UCEC | 0.024472585  |
| UPP1 | Tgf_beta_signaling_pathw   | UCEC | -0.01575562  |
| UPP1 | Thiamine metabolism        | UCEC | 0.068415149  |



|      |                            |      |              |
|------|----------------------------|------|--------------|
| UPP1 | Tnfa_signaling_via_nfk     | UCEC | 0.453705886  |
| UPP1 | Tryptophan metabolism      | UCEC | 0.13912905   |
| UPP1 | Tumor endothelial cell     | UCEC | 0.112669784  |
| UPP1 | Tyrosine metabolism        | UCEC | 0.217185738  |
| UPP1 | Ubiquinone and other ter   | UCEC | 0.092927041  |
| UPP1 | Valine, leucine and isoleu | UCEC | 0.274292334  |
| UPP1 | Valine, leucine and isoleu | UCEC | -0.043832044 |
| UPP1 | Vascular endothelial cell  | UCEC | 0.291675062  |
| UPP1 | Vascular smooth muscle c   | UCEC | 0.075966371  |
| UPP1 | Vegf_signaling_pathway     | UCEC | 0.407653317  |
| UPP1 | Vitamin b6 metabolism      | UCEC | 0.262134706  |
| UPP1 | Willert_wnt_signaling      | UCEC | 0.114431432  |
| UPP1 | Wnt_beta_catenin_signali   | UCEC | -0.092881507 |
| UPP2 | Abnormal plasma cell       | UCEC | -0.069971462 |
| UPP2 | Activated b cell           | UCEC | 0.037285617  |
| UPP2 | Activated cd4+ t cell      | UCEC | 0.054512711  |
| UPP2 | Activated t cell           | UCEC | 0.006859038  |
| UPP2 | Alanine, aspartate and glu | UCEC | -0.199978023 |
| UPP2 | Alcala_apoptosis           | UCEC | -0.149773071 |
| UPP2 | Alpha-linolenic acid meta  | UCEC | 0.194726483  |
| UPP2 | Amino sugar and nucleoti   | UCEC | -0.057963788 |
| UPP2 | Ampk_pathway               | UCEC | -0.284484745 |
| UPP2 | Angiogenesis               | UCEC | 0.038810443  |
| UPP2 | Arachidonic acid metabol   | UCEC | 0.148427607  |
| UPP2 | Arginine and proline meta  | UCEC | -0.039350183 |
| UPP2 | Arginine biosynthesis      | UCEC | -0.222186664 |
| UPP2 | Ascorbate and aldarate me  | UCEC | 0.061768356  |
| UPP2 | Atypical memory b cell     | UCEC | 0.077351396  |
| UPP2 | Axl+siglec6+ dendritic ce  | UCEC | 0.119337858  |
| UPP2 | B cell                     | UCEC | 0.066146663  |
| UPP2 | B1 cell                    | UCEC | 0.087027742  |
| UPP2 | Basal cell                 | UCEC | -0.084569845 |
| UPP2 | Beta-alanine metabolism    | UCEC | 0.061047745  |
| UPP2 | Biosynthesis of unsaturate | UCEC | -0.125970132 |
| UPP2 | Biotin metabolism          | UCEC | 0.155523034  |
| UPP2 | Butanoate metabolism       | UCEC | -0.011555364 |
| UPP2 | Caffeine metabolism        | UCEC | 0.019181796  |
| UPP2 | Cancer stem cell           | UCEC | 0.064685567  |
| UPP2 | Cancer stem-like cell      | UCEC | 0.158510966  |
| UPP2 | Cd4+ cytotoxic t cell      | UCEC | 0.043337579  |
| UPP2 | Cd4+ memory t cell         | UCEC | 0.018357519  |
| UPP2 | Cd4+ regulatory t cell     | UCEC | 0.080156705  |
| UPP2 | Cd4+ t helper cell         | UCEC | 0.096959714  |

|      |                              |      |              |
|------|------------------------------|------|--------------|
| UPP2 | Cd4+cd25+ regulatory t c     | UCEC | 0.081381857  |
| UPP2 | Cd8+ cytotoxic t cell        | UCEC | 0.019566811  |
| UPP2 | Cd8+ regulatory t cell       | UCEC | -0.024411735 |
| UPP2 | Cell_cycle                   | UCEC | -0.34210334  |
| UPP2 | Chandran_metastasis_top5     | UCEC | -0.245067515 |
| UPP2 | Citrate cycle (tca cycle)    | UCEC | -0.276824883 |
| UPP2 | Cysteine and methionine r    | UCEC | -0.160987154 |
| UPP2 | Cytokine induced killer c    | UCEC | -0.022302628 |
| UPP2 | D-arginine and d-ornithin    | UCEC | 0.249353532  |
| UPP2 | D-glutamine and d-glutan     | UCEC | -0.206370605 |
| UPP2 | Dendritic cell               | UCEC | 0.045621174  |
| UPP2 | Dna_repair                   | UCEC | -0.198286974 |
| UPP2 | Dna_replication              | UCEC | -0.33629125  |
| UPP2 | Double-negative memory       | UCEC | 0.03855002   |
| UPP2 | Drug metabolism - cytoch     | UCEC | 0.27537544   |
| UPP2 | Drug metabolism - other c    | UCEC | 0.029626242  |
| UPP2 | E2f_targets                  | UCEC | -0.349347521 |
| UPP2 | Ecm_receptor_interaction     | UCEC | -0.068047516 |
| UPP2 | Effector cd4+ memory t (     | UCEC | 0.028555277  |
| UPP2 | Effector cd8+ memory t (     | UCEC | 0.01383717   |
| UPP2 | Effector memory t cell       | UCEC | 0.048442553  |
| UPP2 | Effector regulatory t (treg  | UCEC | 0.092995644  |
| UPP2 | Elvidge_hif1a_targets_up     | UCEC | -0.266046821 |
| UPP2 | Endothelial cell             | UCEC | -0.035247768 |
| UPP2 | Eosinophil                   | UCEC | 0.028317581  |
| UPP2 | Ether lipid metabolism       | UCEC | 0.151381836  |
| UPP2 | Exhausted cd4+ t cell        | UCEC | -0.050609772 |
| UPP2 | Exhausted cd8+ t cell        | UCEC | -0.009131331 |
| UPP2 | Exhausted t cell             | UCEC | 0.034556072  |
| UPP2 | Fat cell (adipocyte)         | UCEC | -0.077328789 |
| UPP2 | Fatty acid biosynthesis      | UCEC | 0.083880671  |
| UPP2 | Fatty acid degradation       | UCEC | 0.073731327  |
| UPP2 | Fatty acid elongation        | UCEC | -0.194119184 |
| UPP2 | Fibroblast                   | UCEC | 0.12216703   |
| UPP2 | Folate biosynthesis          | UCEC | -0.0108168   |
| UPP2 | Follicular b cell            | UCEC | -0.011444544 |
| UPP2 | Follicular dendritic cell    | UCEC | 0.026694955  |
| UPP2 | Follicular helper (tfh) t ce | UCEC | 0.055840691  |
| UPP2 | Follicular t cell            | UCEC | 0.006761532  |
| UPP2 | Foxp3+il-17+ t cell          | UCEC | -0.046646016 |
| UPP2 | Fructose and mannose me      | UCEC | -0.059202462 |
| UPP2 | G2m_checkpoint               | UCEC | -0.36185335  |
| UPP2 | Galactose metabolism         | UCEC | -0.1018715   |

|      |                            |      |              |
|------|----------------------------|------|--------------|
| UPP2 | Galie_tumor_stemness_ge    | UCEC | 0.041048312  |
| UPP2 | Glutathione metabolism     | UCEC | 0.007767951  |
| UPP2 | Glycerolipid metabolism    | UCEC | 0.002421425  |
| UPP2 | Glycerophospholipid metæ   | UCEC | 0.120980402  |
| UPP2 | Glycine, serine and threor | UCEC | -0.102357326 |
| UPP2 | Glycolysis / gluconeogene  | UCEC | -0.148494614 |
| UPP2 | Glycosaminoglycan biosy    | UCEC | -0.015529076 |
| UPP2 | Glycosaminoglycan biosy    | UCEC | -0.003836947 |
| UPP2 | Glycosaminoglycan biosy    | UCEC | -0.02972472  |
| UPP2 | Glycosaminoglycan degra    | UCEC | 0.053360049  |
| UPP2 | Glycosphingolipid biosyn   | UCEC | -0.06243049  |
| UPP2 | Glycosphingolipid biosyn   | UCEC | -0.011503669 |
| UPP2 | Glycosphingolipid biosyn   | UCEC | 0.071319075  |
| UPP2 | Glycosylphosphatidylinos   | UCEC | -0.020267974 |
| UPP2 | Glyoxylate and dicarboxy   | UCEC | -0.162768429 |
| UPP2 | Granulocyte                | UCEC | 0.058786519  |
| UPP2 | Hedgehog_signaling         | UCEC | -0.018970513 |
| UPP2 | Histidine metabolism       | UCEC | 0.212008539  |
| UPP2 | Hypoxia                    | UCEC | -0.157179505 |
| UPP2 | Il-17ralpha t cell         | UCEC | 0.06366807   |
| UPP2 | Il2_stat5_signaling        | UCEC | -0.017302903 |
| UPP2 | Il6_jak_stat3_signaling    | UCEC | -0.027787824 |
| UPP2 | Immune_checkpoints_tur     | UCEC | -0.040197965 |
| UPP2 | Immune_inhibition_cytok    | UCEC | 0.103652458  |
| UPP2 | Inositol phosphate metabo  | UCEC | -0.186185181 |
| UPP2 | Interleukin_6_signaling    | UCEC | -0.12453222  |
| UPP2 | Jaeger_metastasis_up       | UCEC | -0.277297499 |
| UPP2 | Jain_nfkb_signaling        | UCEC | -0.297960711 |
| UPP2 | Kras_signaling_up          | UCEC | 0.071789881  |
| UPP2 | Linoleic acid metabolism   | UCEC | 0.269697377  |
| UPP2 | Lipoic acid metabolism     | UCEC | 0.158288416  |
| UPP2 | Lysine degradation         | UCEC | -0.206264827 |
| UPP2 | Lysosome                   | UCEC | -0.023654219 |
| UPP2 | M1 macrophage              | UCEC | -0.012703035 |
| UPP2 | M2 macrophage              | UCEC | 0.005676136  |
| UPP2 | Mannose type o-glycan bi   | UCEC | 0.044808699  |
| UPP2 | Mapk_signaling_pathway     | UCEC | -0.134548479 |
| UPP2 | Mapk3_erk1_activation      | UCEC | -0.194353618 |
| UPP2 | Marginal zone b cell       | UCEC | 0.015437339  |
| UPP2 | Memory b cell              | UCEC | 0.087874988  |
| UPP2 | Mesenchymal cell           | UCEC | 0.0708864    |
| UPP2 | Mesenchymal stem cell      | UCEC | 0.092607506  |
| UPP2 | Metabolism of xenobiotic   | UCEC | 0.169574327  |

|      |                             |      |              |
|------|-----------------------------|------|--------------|
| UPP2 | Migrating cancer stem cel   | UCEC | -0.003080502 |
| UPP2 | Mitotic_spindle             | UCEC | -0.350393905 |
| UPP2 | Monocyte                    | UCEC | 0.066993798  |
| UPP2 | Mtor_signaling_pathway      | UCEC | -0.076065281 |
| UPP2 | Mtorc1_signaling            | UCEC | -0.263895731 |
| UPP2 | Mucin type o-glycan biosy   | UCEC | 0.035023564  |
| UPP2 | Myc_targets_v1              | UCEC | -0.286760021 |
| UPP2 | Myeloid cell                | UCEC | 0.026570034  |
| UPP2 | N-glycan biosynthesis       | UCEC | -0.124767693 |
| UPP2 | Naive b cell                | UCEC | 0.046256249  |
| UPP2 | Naive cd4+ t cell           | UCEC | 0.062811323  |
| UPP2 | Naive cd8+ t cell           | UCEC | 0.117239706  |
| UPP2 | Natural killer cell         | UCEC | 0.031310648  |
| UPP2 | Natural killer t (nkt) cell | UCEC | -0.121152947 |
| UPP2 | Natural regulatory t (treg) | UCEC | 0.10258804   |
| UPP2 | Neomycin, kanamycin and     | UCEC | -0.139375952 |
| UPP2 | Neutrophil                  | UCEC | 0.118359894  |
| UPP2 | Nicotinate and nicotinami   | UCEC | 0.159695208  |
| UPP2 | Nitrogen metabolism         | UCEC | -0.019424182 |
| UPP2 | Nod_like_receptor_signal    | UCEC | -0.019731267 |
| UPP2 | Notch_signaling             | UCEC | -0.045823101 |
| UPP2 | One carbon pool by folate   | UCEC | -0.29577123  |
| UPP2 | Other glycan degradation    | UCEC | 0.083117718  |
| UPP2 | Other types of o-glycan b   | UCEC | 0.076919543  |
| UPP2 | Oxidative phosphorylatio    | UCEC | -0.050126664 |
| UPP2 | P53_pathway                 | UCEC | -0.069789769 |
| UPP2 | P53_signaling_pathway       | UCEC | -0.124116858 |
| UPP2 | Pantothenate and coa bios   | UCEC | 0.028032707  |
| UPP2 | Pentose and glucuronate i   | UCEC | -0.029577817 |
| UPP2 | Pentose phosphate pathwa    | UCEC | -0.24763421  |
| UPP2 | Pericyte                    | UCEC | 0.123255409  |
| UPP2 | Phenylalanine metabolism    | UCEC | 0.121499101  |
| UPP2 | Phenylalanine, tyrosine ar  | UCEC | 0.031092175  |
| UPP2 | Phosphonate and phosphir    | UCEC | 0.05022537   |
| UPP2 | Pi3k_akt_activation         | UCEC | -0.109343326 |
| UPP2 | Pi3k_akt_mtor_signaling     | UCEC | -0.236604722 |
| UPP2 | Porphyrin and chlorophyl    | UCEC | -0.085387594 |
| UPP2 | Primary bile acid biosynt   | UCEC | 0.253732739  |
| UPP2 | Propanoate metabolism       | UCEC | -0.138712622 |
| UPP2 | Purine metabolism           | UCEC | -0.199573897 |
| UPP2 | Pyrimidine metabolism       | UCEC | -0.210526656 |
| UPP2 | Pyruvate metabolism         | UCEC | -0.2109012   |
| UPP2 | Regulation_of_autophagy     | UCEC | -0.031499444 |

|      |                            |      |              |
|------|----------------------------|------|--------------|
| UPP2 | Retinol metabolism         | UCEC | 0.157402934  |
| UPP2 | Riboflavin metabolism      | UCEC | -0.026807595 |
| UPP2 | Schmahl_pdgf_signaling     | UCEC | -0.00338716  |
| UPP2 | Selenocompound metabol     | UCEC | -0.15569207  |
| UPP2 | Signaling_by_hippo         | UCEC | -0.217188852 |
| UPP2 | Sphingolipid metabolism    | UCEC | -0.147102679 |
| UPP2 | Starch and sucrose metabo  | UCEC | 0.017174868  |
| UPP2 | Steroid biosynthesis       | UCEC | -0.127692547 |
| UPP2 | Steroid hormone biosynth   | UCEC | 0.193903098  |
| UPP2 | Sulfur metabolism          | UCEC | 0.011146279  |
| UPP2 | Synthesis and degradation  | UCEC | -0.13136836  |
| UPP2 | T helper cell              | UCEC | 0.106176626  |
| UPP2 | T helper1 (th1) cell       | UCEC | 0.048269755  |
| UPP2 | T helper17 (th17) cell     | UCEC | 0.123722321  |
| UPP2 | T helper2 (th2) cell       | UCEC | 0.11692261   |
| UPP2 | T helper9 (th9) cell       | UCEC | 0.071751577  |
| UPP2 | Taurine and hypotaurine r  | UCEC | 0.156708194  |
| UPP2 | Terpenoid backbone biosy   | UCEC | -0.182981432 |
| UPP2 | Tgf_beta_signaling_pathw   | UCEC | -0.136525629 |
| UPP2 | Thiamine metabolism        | UCEC | -0.026162919 |
| UPP2 | Tnfa_signaling_via_nfkb    | UCEC | -0.021740854 |
| UPP2 | Tryptophan metabolism      | UCEC | 0.067593905  |
| UPP2 | Tumor endothelial cell     | UCEC | -0.011533569 |
| UPP2 | Tyrosine metabolism        | UCEC | 0.165931318  |
| UPP2 | Ubiquinone and other terf  | UCEC | -0.086288544 |
| UPP2 | Valine, leucine and isoleu | UCEC | -0.003693478 |
| UPP2 | Valine, leucine and isoleu | UCEC | -0.10966766  |
| UPP2 | Vascular endothelial cell  | UCEC | 0.077567223  |
| UPP2 | Vascular smooth muscle c   | UCEC | 0.103721289  |
| UPP2 | Vegf_signaling_pathway     | UCEC | -0.131831331 |
| UPP2 | Vitamin b6 metabolism      | UCEC | -0.214621085 |
| UPP2 | Willert_wnt_signaling      | UCEC | -0.031657667 |
| UPP2 | Wnt_beta_catenin_signali   | UCEC | -0.001654001 |
| CDA  | Abnormal plasma cell       | UCS  | 0.3349326    |
| CDA  | Activated b cell           | UCS  | 0.070067225  |
| CDA  | Activated cd4+ t cell      | UCS  | -0.052524445 |
| CDA  | Activated t cell           | UCS  | 0.038865107  |
| CDA  | Alanine, aspartate and glu | UCS  | -0.369707241 |
| CDA  | Alcala_apoptosis           | UCS  | 0.00927649   |
| CDA  | Alpha-linolenic acid meta  | UCS  | 0.064301108  |
| CDA  | Amino sugar and nucleoti   | UCS  | -0.02848045  |
| CDA  | Ampk_pathway               | UCS  | -0.051373548 |
| CDA  | Angiogenesis               | UCS  | 0.115493872  |

|     |                                         |     |              |
|-----|-----------------------------------------|-----|--------------|
| CDA | Arachidonic acid metabolism             | UCS | 0.202675373  |
| CDA | Arginine and proline metabolism         | UCS | -0.05190385  |
| CDA | Arginine biosynthesis                   | UCS | -0.192555164 |
| CDA | Ascorbate and aldarate metabolism       | UCS | -0.141264407 |
| CDA | Atypical memory b cell                  | UCS | -0.015350676 |
| CDA | Axl+siglec6+ dendritic cell             | UCS | 0.229038803  |
| CDA | B cell                                  | UCS | -0.081580229 |
| CDA | B1 cell                                 | UCS | 0.015565342  |
| CDA | Basal cell                              | UCS | 0.217455937  |
| CDA | Beta-alanine metabolism                 | UCS | -0.186568327 |
| CDA | Biosynthesis of unsaturated fatty acids | UCS | -0.065200475 |
| CDA | Biotin metabolism                       | UCS | -0.064081335 |
| CDA | Butanoate metabolism                    | UCS | -0.163996567 |
| CDA | Caffeine metabolism                     | UCS | 0.101708008  |
| CDA | Cancer stem cell                        | UCS | 0.160025704  |
| CDA | Cancer stem-like cell                   | UCS | -0.016548014 |
| CDA | Cd4+ cytotoxic t cell                   | UCS | 0.008585225  |
| CDA | Cd4+ memory t cell                      | UCS | -0.032391708 |
| CDA | Cd4+ regulatory t cell                  | UCS | 0.062673247  |
| CDA | Cd4+ t helper cell                      | UCS | 0.048244977  |
| CDA | Cd4+cd25+ regulatory t cell             | UCS | 0.044602228  |
| CDA | Cd8+ cytotoxic t cell                   | UCS | -0.028127107 |
| CDA | Cd8+ regulatory t cell                  | UCS | -0.013663554 |
| CDA | Cell cycle                              | UCS | -0.189380018 |
| CDA | Chandran_metastasis_top50               | UCS | -0.540143551 |
| CDA | Citrate cycle (tricarballic acid cycle) | UCS | -0.242127895 |
| CDA | Cysteine and methionine metabolism      | UCS | -0.20111002  |
| CDA | Cytokine induced killer cell            | UCS | 0.249348491  |
| CDA | D-arginine and d-ornithine              | UCS | 0.091633396  |
| CDA | D-glutamine and d-glutamate             | UCS | -0.412655072 |
| CDA | Dendritic cell                          | UCS | -0.024507764 |
| CDA | Dna_repair                              | UCS | 0.177707418  |
| CDA | Dna_replication                         | UCS | -0.099465818 |
| CDA | Double-negative memory t cell           | UCS | 0.133497161  |
| CDA | Drug metabolism - cytochrome p450       | UCS | 0.061619142  |
| CDA | Drug metabolism - other                 | UCS | 0.119831879  |
| CDA | E2f_targets                             | UCS | -0.194387044 |
| CDA | Ecm_receptor_interaction                | UCS | 0.157600512  |
| CDA | Effector cd4+ memory t cell             | UCS | -0.069281092 |
| CDA | Effector cd8+ memory t cell             | UCS | 0.00950188   |
| CDA | Effector memory t cell                  | UCS | -0.048314686 |
| CDA | Effector regulatory t (treg)            | UCS | -0.108587908 |
| CDA | Elvidge_hif1a_targets_up                | UCS | -0.284177267 |

|     |                              |     |              |
|-----|------------------------------|-----|--------------|
| CDA | Endothelial cell             | UCS | 0.160977555  |
| CDA | Eosinophil                   | UCS | -0.037812996 |
| CDA | Ether lipid metabolism       | UCS | 0.263564537  |
| CDA | Exhausted cd4+ t cell        | UCS | 0.06021585   |
| CDA | Exhausted cd8+ t cell        | UCS | 0.040803151  |
| CDA | Exhausted t cell             | UCS | 0.039925699  |
| CDA | Fat cell (adipocyte)         | UCS | 0.029006327  |
| CDA | Fatty acid biosynthesis      | UCS | -0.237563943 |
| CDA | Fatty acid degradation       | UCS | -0.352856754 |
| CDA | Fatty acid elongation        | UCS | -0.049979612 |
| CDA | Fibroblast                   | UCS | 0.21002872   |
| CDA | Folate biosynthesis          | UCS | -0.088280593 |
| CDA | Follicular b cell            | UCS | 0.058026308  |
| CDA | Follicular dendritic cell    | UCS | 0.045101357  |
| CDA | Follicular helper (tfh) t ce | UCS | -0.059505368 |
| CDA | Follicular t cell            | UCS | 0.133011659  |
| CDA | Foxp3+il-17+ t cell          | UCS | 0.063318666  |
| CDA | Fructose and mannose me      | UCS | 0.066775929  |
| CDA | G2m_checkpoint               | UCS | -0.259751292 |
| CDA | Galactose metabolism         | UCS | 0.072049554  |
| CDA | Galie_tumor_stemness_ge      | UCS | 0.310180496  |
| CDA | Glutathione metabolism       | UCS | 0.045854945  |
| CDA | Glycerolipid metabolism      | UCS | -0.188212621 |
| CDA | Glycerophospholipid metæ     | UCS | 0.101806435  |
| CDA | Glycine, serine and threor   | UCS | -0.104462764 |
| CDA | Glycolysis / gluconeogene    | UCS | -0.004182531 |
| CDA | Glycosaminoglycan biosy      | UCS | 0.283796367  |
| CDA | Glycosaminoglycan biosy      | UCS | 0.037176805  |
| CDA | Glycosaminoglycan biosy      | UCS | 0.349692804  |
| CDA | Glycosaminoglycan degra      | UCS | 0.121723245  |
| CDA | Glycosphingolipid biosyn     | UCS | 0.129641095  |
| CDA | Glycosphingolipid biosyn     | UCS | 0.079055311  |
| CDA | Glycosphingolipid biosyn     | UCS | 0.062681059  |
| CDA | Glycosylphosphatidylinos     | UCS | 0.023411678  |
| CDA | Glyoxylate and dicarboxy     | UCS | -0.235042772 |
| CDA | Granulocyte                  | UCS | -0.094713837 |
| CDA | Hedgehog_signaling           | UCS | -0.014002251 |
| CDA | Histidine metabolism         | UCS | -0.028204974 |
| CDA | Hypoxia                      | UCS | 0.095153107  |
| CDA | Il-17alpha t cell            | UCS | 0.048989857  |
| CDA | Il2_stat5_signaling          | UCS | 0.112570706  |
| CDA | Il6_jak_stat3_signaling      | UCS | 0.039391534  |
| CDA | Immune_checkpoints_tur       | UCS | 0.10930667   |

|     |                             |     |              |
|-----|-----------------------------|-----|--------------|
| CDA | Immune_inhibition_cytok     | UCS | 0.097645547  |
| CDA | Inositol phosphate metabo   | UCS | -0.018020804 |
| CDA | Interleukin_6_signaling     | UCS | -0.402555022 |
| CDA | Jaeger_metastasis_up        | UCS | -0.028121895 |
| CDA | Jain_nfkb_signaling         | UCS | -0.312505358 |
| CDA | Kras_signaling_up           | UCS | 0.168561125  |
| CDA | Linoleic acid metabolism    | UCS | 0.126724402  |
| CDA | Lipoic acid metabolism      | UCS | -0.051818649 |
| CDA | Lysine degradation          | UCS | -0.454585526 |
| CDA | Lysosome                    | UCS | 0.013895964  |
| CDA | M1 macrophage               | UCS | -0.069641403 |
| CDA | M2 macrophage               | UCS | 0.003920364  |
| CDA | Mannose type o-glycan bi    | UCS | 0.16643447   |
| CDA | Mapk_signaling_pathway      | UCS | 0.230720715  |
| CDA | Mapk3_erk1_activation       | UCS | -0.464603013 |
| CDA | Marginal zone b cell        | UCS | 0.017340289  |
| CDA | Memory b cell               | UCS | -0.087993206 |
| CDA | Mesenchymal cell            | UCS | 0.258754755  |
| CDA | Mesenchymal stem cell       | UCS | 0.067111704  |
| CDA | Metabolism of xenobiotic    | UCS | 0.148711922  |
| CDA | Migrating cancer stem cel   | UCS | -0.018148014 |
| CDA | Mitotic_spindle             | UCS | -0.145170787 |
| CDA | Monocyte                    | UCS | 0.093905447  |
| CDA | Mtor_signaling_pathway      | UCS | -0.320870055 |
| CDA | Mtorc1_signaling            | UCS | -0.155751123 |
| CDA | Mucin type o-glycan biosy   | UCS | 0.036550731  |
| CDA | Myc_targets_v1              | UCS | -0.147734589 |
| CDA | Myeloid cell                | UCS | -0.054383429 |
| CDA | N-glycan biosynthesis       | UCS | -0.037469039 |
| CDA | Naive b cell                | UCS | 0.060770488  |
| CDA | Naive cd4+ t cell           | UCS | 0.052345107  |
| CDA | Naive cd8+ t cell           | UCS | 0.184956601  |
| CDA | Natural killer cell         | UCS | -0.037613012 |
| CDA | Natural killer t (nkt) cell | UCS | -0.087369722 |
| CDA | Natural regulatory t (treg) | UCS | 0.051304989  |
| CDA | Neomycin, kanamycin and     | UCS | 0.111725161  |
| CDA | Neutrophil                  | UCS | 0.031896571  |
| CDA | Nicotinate and nicotinami   | UCS | -0.101822445 |
| CDA | Nitrogen metabolism         | UCS | -0.01155098  |
| CDA | Nod_like_receptor_signal    | UCS | 0.004203684  |
| CDA | Notch_signaling             | UCS | 0.188088211  |
| CDA | One carbon pool by folate   | UCS | -0.024577385 |
| CDA | Other glycan degradation    | UCS | -0.015550324 |



|     |                                                   |     |              |
|-----|---------------------------------------------------|-----|--------------|
| CDA | Other types of o-glycan b                         | UCS | 0.267346657  |
| CDA | Oxidative phosphorylation                         | UCS | -0.057254275 |
| CDA | P53_pathway                                       | UCS | 0.093019564  |
| CDA | P53_signaling_pathway                             | UCS | -0.215845163 |
| CDA | Pantothenate and coa biosynthesis                 | UCS | 0.010228847  |
| CDA | Pentose and glucuronate interconversions          | UCS | -0.060551686 |
| CDA | Pentose phosphate pathway                         | UCS | 0.128451572  |
| CDA | Pericyte                                          | UCS | 0.227263645  |
| CDA | Phenylalanine metabolism                          | UCS | 0.040519064  |
| CDA | Phenylalanine, tyrosine and tryptophan metabolism | UCS | -0.098865434 |
| CDA | Phosphonate and phosphite metabolism              | UCS | 0.140729802  |
| CDA | Pi3k_akt_activation                               | UCS | 0.060666207  |
| CDA | Pi3k_akt_mtor_signaling                           | UCS | 0.009247292  |
| CDA | Porphyrin and chlorophyll metabolism              | UCS | -0.145558092 |
| CDA | Primary bile acid biosynthesis                    | UCS | 0.202036092  |
| CDA | Propanoate metabolism                             | UCS | -0.330087202 |
| CDA | Purine metabolism                                 | UCS | -0.032151078 |
| CDA | Pyrimidine metabolism                             | UCS | -0.034196452 |
| CDA | Pyruvate metabolism                               | UCS | -0.264645355 |
| CDA | Regulation_of_autophagy                           | UCS | 0.150235626  |
| CDA | Retinol metabolism                                | UCS | 0.248114207  |
| CDA | Riboflavin metabolism                             | UCS | 0.097693881  |
| CDA | Schmahl_pdgf_signaling                            | UCS | -0.096128254 |
| CDA | Selenocompound metabolism                         | UCS | -0.09869319  |
| CDA | Signaling_by_hippo                                | UCS | -0.229566295 |
| CDA | Sphingolipid metabolism                           | UCS | 0.051770339  |
| CDA | Starch and sucrose metabolism                     | UCS | -0.15120965  |
| CDA | Steroid biosynthesis                              | UCS | 0.057285772  |
| CDA | Steroid hormone biosynthesis                      | UCS | 0.056484423  |
| CDA | Sulfur metabolism                                 | UCS | 0.077445834  |
| CDA | Synthesis and degradation of ribonucleotides      | UCS | 0.044186663  |
| CDA | T helper cell                                     | UCS | 0.000968936  |
| CDA | T helper1 (th1) cell                              | UCS | -0.025403854 |
| CDA | T helper17 (th17) cell                            | UCS | -0.049651626 |
| CDA | T helper2 (th2) cell                              | UCS | 0.116190835  |
| CDA | T helper9 (th9) cell                              | UCS | 0.140754378  |
| CDA | Taurine and hypotaurine metabolism                | UCS | 0.155138625  |
| CDA | Terpenoid backbone biosynthesis                   | UCS | -0.11746091  |
| CDA | Tgf_beta_signaling_pathway                        | UCS | -0.093550689 |
| CDA | Thiamine metabolism                               | UCS | -0.14462883  |
| CDA | Tnfa_signaling_via_nfb                            | UCS | 0.061507019  |
| CDA | Tryptophan metabolism                             | UCS | -0.340144988 |
| CDA | Tumor endothelial cell                            | UCS | 0.192450069  |

|      |                            |     |              |
|------|----------------------------|-----|--------------|
| CDA  | Tyrosine metabolism        | UCS | 0.094585108  |
| CDA  | Ubiquinone and other ter   | UCS | -0.216482756 |
| CDA  | Valine, leucine and isoleu | UCS | -0.078095525 |
| CDA  | Valine, leucine and isoleu | UCS | -0.343219467 |
| CDA  | Vascular endothelial cell  | UCS | 0.007571843  |
| CDA  | Vascular smooth muscle c   | UCS | 0.280473694  |
| CDA  | Vegf_signaling_pathway     | UCS | 0.322566467  |
| CDA  | Vitamin b6 metabolism      | UCS | -0.035628977 |
| CDA  | Willert_wnt_signaling      | UCS | 0.088413493  |
| CDA  | Wnt_beta_catenin_signali   | UCS | 0.07410416   |
| UCK1 | Abnormal plasma cell       | UCS | 0.065189678  |
| UCK1 | Activated b cell           | UCS | -0.093048052 |
| UCK1 | Activated cd4+ t cell      | UCS | -0.23427911  |
| UCK1 | Activated t cell           | UCS | -0.050841711 |
| UCK1 | Alanine, aspartate and glu | UCS | -0.288918665 |
| UCK1 | Alcala_apoptosis           | UCS | 0.024280752  |
| UCK1 | Alpha-linolenic acid meta  | UCS | 0.117650112  |
| UCK1 | Amino sugar and nucleoti   | UCS | -0.115778104 |
| UCK1 | Ampk_pathway               | UCS | 0.131222847  |
| UCK1 | Angiogenesis               | UCS | -0.338219613 |
| UCK1 | Arachidonic acid metabol   | UCS | 0.114367183  |
| UCK1 | Arginine and proline met   | UCS | 0.038921359  |
| UCK1 | Arginine biosynthesis      | UCS | -0.171588787 |
| UCK1 | Ascorbate and aldarate m   | UCS | -0.056311098 |
| UCK1 | Atypical memory b cell     | UCS | -0.048295662 |
| UCK1 | Axl+siglec6+ dendritic ce  | UCS | -0.086293088 |
| UCK1 | B cell                     | UCS | -0.308291306 |
| UCK1 | B1 cell                    | UCS | 0.020432374  |
| UCK1 | Basal cell                 | UCS | -0.024970455 |
| UCK1 | Beta-alanine metabolism    | UCS | -0.111104926 |
| UCK1 | Biosynthesis of unsaturate | UCS | -0.254467894 |
| UCK1 | Biotin metabolism          | UCS | -0.166089259 |
| UCK1 | Butanoate metabolism       | UCS | -0.027980648 |
| UCK1 | Caffeine metabolism        | UCS | 0.085581904  |
| UCK1 | Cancer stem cell           | UCS | -0.297633407 |
| UCK1 | Cancer stem-like cell      | UCS | -0.324901423 |
| UCK1 | Cd4+ cytotoxic t cell      | UCS | -0.149831879 |
| UCK1 | Cd4+ memory t cell         | UCS | -0.125449343 |
| UCK1 | Cd4+ regulatory t cell     | UCS | -0.115954987 |
| UCK1 | Cd4+ t helper cell         | UCS | -0.059703191 |
| UCK1 | Cd4+cd25+ regulatory t c   | UCS | -0.091426094 |
| UCK1 | Cd8+ cytotoxic t cell      | UCS | -0.169211467 |
| UCK1 | Cd8+ regulatory t cell     | UCS | -0.107111644 |

|      |                              |     |              |
|------|------------------------------|-----|--------------|
| UCK1 | Cell_cycle                   | UCS | -0.072382829 |
| UCK1 | Chandran_metastasis_top      | UCS | -0.201606717 |
| UCK1 | Citrate cycle (tca cycle)    | UCS | -0.111641017 |
| UCK1 | Cysteine and methionine r    | UCS | -0.220716972 |
| UCK1 | Cytokine induced killer c    | UCS | 0.079512354  |
| UCK1 | D-arginine and d-ornithin    | UCS | 0.205561081  |
| UCK1 | D-glutamine and d-glutan     | UCS | -0.278232554 |
| UCK1 | Dendritic cell               | UCS | -0.2649196   |
| UCK1 | Dna_repair                   | UCS | 0.340203471  |
| UCK1 | Dna_replication              | UCS | 0.038602238  |
| UCK1 | Double-negative memory       | UCS | -0.028093952 |
| UCK1 | Drug metabolism - cytoch     | UCS | 0.081735217  |
| UCK1 | Drug metabolism - other      | UCS | 0.166944761  |
| UCK1 | E2f_targets                  | UCS | -0.068475525 |
| UCK1 | Ecm_receptor_interaction     | UCS | -0.336241483 |
| UCK1 | Effector cd4+ memory t       | UCS | -0.183076845 |
| UCK1 | Effector cd8+ memory t       | UCS | -0.242217685 |
| UCK1 | Effector memory t cell       | UCS | -0.167106058 |
| UCK1 | Effector regulatory t (treg  | UCS | -0.166790978 |
| UCK1 | Elvidge_hif1a_targets_up     | UCS | -0.159540895 |
| UCK1 | Endothelial cell             | UCS | -0.240066766 |
| UCK1 | Eosinophil                   | UCS | -0.271989318 |
| UCK1 | Ether lipid metabolism       | UCS | -0.012286063 |
| UCK1 | Exhausted cd4+ t cell        | UCS | -0.207620047 |
| UCK1 | Exhausted cd8+ t cell        | UCS | -0.257075605 |
| UCK1 | Exhausted t cell             | UCS | -0.050644229 |
| UCK1 | Fat cell (adipocyte)         | UCS | 0.134055954  |
| UCK1 | Fatty acid biosynthesis      | UCS | -0.107811158 |
| UCK1 | Fatty acid degradation       | UCS | -0.106971565 |
| UCK1 | Fatty acid elongation        | UCS | -0.118808109 |
| UCK1 | Fibroblast                   | UCS | -0.138094604 |
| UCK1 | Folate biosynthesis          | UCS | 0.072172502  |
| UCK1 | Follicular b cell            | UCS | -0.18022553  |
| UCK1 | Follicular dendritic cell    | UCS | -0.088491641 |
| UCK1 | Follicular helper (tfh) t ce | UCS | -0.138212287 |
| UCK1 | Follicular t cell            | UCS | 0.039016727  |
| UCK1 | Foxp3+il-17+ t cell          | UCS | 0.051089434  |
| UCK1 | Fructose and mannose me      | UCS | 0.019792026  |
| UCK1 | G2m_checkpoint               | UCS | -0.16392366  |
| UCK1 | Galactose metabolism         | UCS | -0.232750433 |
| UCK1 | Galie_tumor_stemness_ge      | UCS | -0.173375259 |
| UCK1 | Glutathione metabolism       | UCS | 0.022675691  |
| UCK1 | Glycerolipid metabolism      | UCS | 0.046556718  |

|      |                                          |     |              |
|------|------------------------------------------|-----|--------------|
| UCK1 | Glycerophospholipid metabolism           | UCS | 0.022157916  |
| UCK1 | Glycine, serine and threonine metabolism | UCS | -0.013882445 |
| UCK1 | Glycolysis / gluconeogenesis             | UCS | 0.078120192  |
| UCK1 | Glycosaminoglycan biosynthesis           | UCS | 0.005055921  |
| UCK1 | Glycosaminoglycan biosynthesis           | UCS | -0.181500378 |
| UCK1 | Glycosaminoglycan biosynthesis           | UCS | -0.077833424 |
| UCK1 | Glycosaminoglycan degradation            | UCS | -0.147459203 |
| UCK1 | Glycosphingolipid biosynthesis           | UCS | -0.062149602 |
| UCK1 | Glycosphingolipid biosynthesis           | UCS | -0.192695802 |
| UCK1 | Glycosphingolipid biosynthesis           | UCS | -0.145527865 |
| UCK1 | Glycosylphosphatidylinositol signaling   | UCS | -0.060302852 |
| UCK1 | Glyoxylate and dicarboxylate metabolism  | UCS | -0.036072466 |
| UCK1 | Granulocyte                              | UCS | -0.229583056 |
| UCK1 | Hedgehog signaling                       | UCS | -0.328032015 |
| UCK1 | Histidine metabolism                     | UCS | 0.07333035   |
| UCK1 | Hypoxia                                  | UCS | -0.159999338 |
| UCK1 | IL-17 receptor signaling                 | UCS | -0.026919227 |
| UCK1 | IL2 signaling                            | UCS | -0.170349882 |
| UCK1 | IL6 signaling                            | UCS | -0.219364671 |
| UCK1 | Immune checkpoints                       | UCS | -0.122295558 |
| UCK1 | Immune inhibition                        | UCS | -0.043349854 |
| UCK1 | Inositol phosphate metabolism            | UCS | -0.184911633 |
| UCK1 | Interleukin 6 signaling                  | UCS | -0.340839285 |
| UCK1 | Jaeger metastasis up                     | UCS | -0.001327138 |
| UCK1 | Jain nfkb signaling                      | UCS | -0.165480774 |
| UCK1 | Kras signaling up                        | UCS | -0.283096322 |
| UCK1 | Linoleic acid metabolism                 | UCS | 0.188492032  |
| UCK1 | Lipoic acid metabolism                   | UCS | -0.012568807 |
| UCK1 | Lysine degradation                       | UCS | -0.18741165  |
| UCK1 | Lysosome                                 | UCS | -0.173700316 |
| UCK1 | M1 macrophage                            | UCS | -0.245130909 |
| UCK1 | M2 macrophage                            | UCS | -0.266976516 |
| UCK1 | Mannose type o-glycan biosynthesis       | UCS | 0.101489945  |
| UCK1 | Mapk signaling pathway                   | UCS | -0.025470545 |
| UCK1 | Mapk3 erk1 activation                    | UCS | -0.269242684 |
| UCK1 | Marginal zone b cell                     | UCS | 0.036261415  |
| UCK1 | Memory b cell                            | UCS | -0.095418318 |
| UCK1 | Mesenchymal cell                         | UCS | 0.04001969   |
| UCK1 | Mesenchymal stem cell                    | UCS | -0.381473657 |
| UCK1 | Metabolism of xenobiotics                | UCS | 0.173188056  |
| UCK1 | Migrating cancer stem cell               | UCS | -0.172981188 |
| UCK1 | Mitotic spindle                          | UCS | -0.258558711 |
| UCK1 | Monocyte                                 | UCS | -0.209525528 |

|      |                                                   |     |              |
|------|---------------------------------------------------|-----|--------------|
| UCK1 | Mtor_signaling_pathway                            | UCS | -0.122150486 |
| UCK1 | Mtorc1_signaling                                  | UCS | -0.120778278 |
| UCK1 | Mucin type o-glycan biosynthesis                  | UCS | -0.308410472 |
| UCK1 | Myc_targets_v1                                    | UCS | 0.044649708  |
| UCK1 | Myeloid cell                                      | UCS | -0.249149076 |
| UCK1 | N-glycan biosynthesis                             | UCS | -0.350250722 |
| UCK1 | Naive b cell                                      | UCS | -0.086781518 |
| UCK1 | Naive cd4+ t cell                                 | UCS | -0.311392274 |
| UCK1 | Naive cd8+ t cell                                 | UCS | -0.279152455 |
| UCK1 | Natural killer cell                               | UCS | -0.220229506 |
| UCK1 | Natural killer t (nkt) cell                       | UCS | -0.069999602 |
| UCK1 | Natural regulatory t (treg) cell                  | UCS | -0.194607768 |
| UCK1 | Neomycin, kanamycin and paromomycin               | UCS | -0.199520563 |
| UCK1 | Neutrophil                                        | UCS | -0.283369161 |
| UCK1 | Nicotinate and nicotinamide metabolism            | UCS | -0.153651517 |
| UCK1 | Nitrogen metabolism                               | UCS | -0.003073212 |
| UCK1 | Nod_like_receptor_signaling                       | UCS | -0.207040857 |
| UCK1 | Notch_signaling                                   | UCS | -0.304128852 |
| UCK1 | One carbon pool by folate                         | UCS | 0.055397133  |
| UCK1 | Other glycan degradation                          | UCS | -0.214544657 |
| UCK1 | Other types of o-glycan biosynthesis              | UCS | -0.024511103 |
| UCK1 | Oxidative phosphorylation                         | UCS | 0.20006148   |
| UCK1 | P53_pathway                                       | UCS | 0.002991661  |
| UCK1 | P53_signaling_pathway                             | UCS | -0.156732941 |
| UCK1 | Pantothenate and coa biosynthesis                 | UCS | -0.161955869 |
| UCK1 | Pentose and glucuronate interconversions          | UCS | -0.103909287 |
| UCK1 | Pentose phosphate pathway                         | UCS | 0.099247317  |
| UCK1 | Pericyte                                          | UCS | -0.103172662 |
| UCK1 | Phenylalanine metabolism                          | UCS | -0.011400068 |
| UCK1 | Phenylalanine, tyrosine and tryptophan metabolism | UCS | -0.142414861 |
| UCK1 | Phosphonate and phosphite metabolism              | UCS | 0.170882081  |
| UCK1 | Pi3k_akt_activation                               | UCS | -0.304685841 |
| UCK1 | Pi3k_akt_mtor_signaling                           | UCS | -0.018251717 |
| UCK1 | Porphyrin and chlorophyll metabolism              | UCS | 0.035235468  |
| UCK1 | Primary bile acid biosynthesis                    | UCS | 0.066256985  |
| UCK1 | Propanoate metabolism                             | UCS | -0.217963614 |
| UCK1 | Purine metabolism                                 | UCS | -0.039473418 |
| UCK1 | Pyrimidine metabolism                             | UCS | 0.112289323  |
| UCK1 | Pyruvate metabolism                               | UCS | -0.028743472 |
| UCK1 | Regulation_of_autophagy                           | UCS | 0.096995527  |
| UCK1 | Retinol metabolism                                | UCS | 0.141910539  |
| UCK1 | Riboflavin metabolism                             | UCS | -0.123853954 |
| UCK1 | Schmahl_pdgf_signaling                            | UCS | -0.192764423 |

|      |                            |     |              |
|------|----------------------------|-----|--------------|
| UCK1 | Selenocompound metabol     | UCS | -0.287661554 |
| UCK1 | Signaling_by_hippo         | UCS | -0.319871434 |
| UCK1 | Sphingolipid metabolism    | UCS | -0.269076728 |
| UCK1 | Starch and sucrose metabo  | UCS | -0.187472369 |
| UCK1 | Steroid biosynthesis       | UCS | 0.118379739  |
| UCK1 | Steroid hormone biosynth   | UCS | -0.081354648 |
| UCK1 | Sulfur metabolism          | UCS | -0.208541469 |
| UCK1 | Synthesis and degradation  | UCS | 0.155754549  |
| UCK1 | T helper cell              | UCS | -0.211829418 |
| UCK1 | T helper1 (th1) cell       | UCS | -0.20592051  |
| UCK1 | T helper17 (th17) cell     | UCS | -0.245192565 |
| UCK1 | T helper2 (th2) cell       | UCS | -0.137883625 |
| UCK1 | T helper9 (th9) cell       | UCS | -0.118891017 |
| UCK1 | Taurine and hypotaurine r  | UCS | -0.208773592 |
| UCK1 | Terpenoid backbone biosy   | UCS | -0.034800787 |
| UCK1 | Tgf_beta_signaling_pathw   | UCS | -0.308784235 |
| UCK1 | Thiamine metabolism        | UCS | -0.03883597  |
| UCK1 | Tnfa_signaling_via_nfk     | UCS | -0.21948866  |
| UCK1 | Tryptophan metabolism      | UCS | -0.15931352  |
| UCK1 | Tumor endothelial cell     | UCS | 0.242100879  |
| UCK1 | Tyrosine metabolism        | UCS | 0.083521044  |
| UCK1 | Ubiquinone and other ter   | UCS | -0.0342551   |
| UCK1 | Valine, leucine and isoleu | UCS | -0.084728649 |
| UCK1 | Valine, leucine and isoleu | UCS | -0.115348884 |
| UCK1 | Vascular endothelial cell  | UCS | -0.318302088 |
| UCK1 | Vascular smooth muscle c   | UCS | 0.036335311  |
| UCK1 | Vegf_signaling_pathway     | UCS | 0.161054557  |
| UCK1 | Vitamin b6 metabolism      | UCS | -0.124986463 |
| UCK1 | Willert_wnt_signaling      | UCS | -0.181557347 |
| UCK1 | Wnt_beta_catenin_signali   | UCS | -0.311666047 |
| UCK2 | Abnormal plasma cell       | UCS | -0.279468663 |
| UCK2 | Activated b cell           | UCS | -0.015038762 |
| UCK2 | Activated cd4+ t cell      | UCS | -0.119978881 |
| UCK2 | Activated t cell           | UCS | 0.022170402  |
| UCK2 | Alanine, aspartate and glu | UCS | 0.253667197  |
| UCK2 | Alcala_apoptosis           | UCS | 0.315447507  |
| UCK2 | Alpha-linolenic acid meta  | UCS | -0.156351903 |
| UCK2 | Amino sugar and nucleoti   | UCS | 0.268273081  |
| UCK2 | Ampk_pathway               | UCS | 0.087278845  |
| UCK2 | Angiogenesis               | UCS | -0.231696461 |
| UCK2 | Arachidonic acid metabo    | UCS | -0.059792006 |
| UCK2 | Arginine and proline met   | UCS | 0.249089448  |
| UCK2 | Arginine biosynthesis      | UCS | 0.237570239  |

|      |                             |     |              |
|------|-----------------------------|-----|--------------|
| UCK2 | Ascorbate and aldarate me   | UCS | 0.257229747  |
| UCK2 | Atypical memory b cell      | UCS | -0.026161738 |
| UCK2 | Axl+siglec6+ dendritic ce   | UCS | -0.510437511 |
| UCK2 | B cell                      | UCS | -0.0730301   |
| UCK2 | B1 cell                     | UCS | -0.084048133 |
| UCK2 | Basal cell                  | UCS | -0.257557857 |
| UCK2 | Beta-alanine metabolism     | UCS | -0.039268295 |
| UCK2 | Biosynthesis of unsaturate  | UCS | 0.392219287  |
| UCK2 | Biotin metabolism           | UCS | 0.07885541   |
| UCK2 | Butanoate metabolism        | UCS | 0.217175497  |
| UCK2 | Caffeine metabolism         | UCS | -0.156081641 |
| UCK2 | Cancer stem cell            | UCS | -0.437272478 |
| UCK2 | Cancer stem-like cell       | UCS | -0.298691337 |
| UCK2 | Cd4+ cytotoxic t cell       | UCS | -0.136481067 |
| UCK2 | Cd4+ memory t cell          | UCS | 0.000712163  |
| UCK2 | Cd4+ regulatory t cell      | UCS | -0.157127784 |
| UCK2 | Cd4+ t helper cell          | UCS | -0.095423231 |
| UCK2 | Cd4+cd25+ regulatory t c    | UCS | -0.081850656 |
| UCK2 | Cd8+ cytotoxic t cell       | UCS | 0.069184434  |
| UCK2 | Cd8+ regulatory t cell      | UCS | 0.095972216  |
| UCK2 | Cell_cycle                  | UCS | 0.142907692  |
| UCK2 | Chandran_metastasis_top5    | UCS | 0.258309513  |
| UCK2 | Citrate cycle (tca cycle)   | UCS | 0.354011844  |
| UCK2 | Cysteine and methionine r   | UCS | 0.364039395  |
| UCK2 | Cytokine induced killer c   | UCS | -0.166028292 |
| UCK2 | D-arginine and d-ornithin   | UCS | -0.060468836 |
| UCK2 | D-glutamine and d-glutan    | UCS | 0.197419389  |
| UCK2 | Dendritic cell              | UCS | -0.089387566 |
| UCK2 | Dna_repair                  | UCS | 0.471591524  |
| UCK2 | Dna_replication             | UCS | 0.430021726  |
| UCK2 | Double-negative memory      | UCS | 0.042202042  |
| UCK2 | Drug metabolism - cytoch    | UCS | 0.125732579  |
| UCK2 | Drug metabolism - other     | UCS | 0.420426442  |
| UCK2 | E2f_targets                 | UCS | 0.376212537  |
| UCK2 | Ecm_receptor_interaction    | UCS | -0.366242105 |
| UCK2 | Effector cd4+ memory t (    | UCS | -0.139581167 |
| UCK2 | Effector cd8+ memory t (    | UCS | -0.179405508 |
| UCK2 | Effector memory t cell      | UCS | -0.084042716 |
| UCK2 | Effector regulatory t (treg | UCS | -0.101145913 |
| UCK2 | Elvidge_hif1a_targets_up    | UCS | 0.371656468  |
| UCK2 | Endothelial cell            | UCS | -0.27873204  |
| UCK2 | Eosinophil                  | UCS | -0.065647184 |
| UCK2 | Ether lipid metabolism      | UCS | -0.172535873 |

|      |                              |     |              |
|------|------------------------------|-----|--------------|
| UCK2 | Exhausted cd4+ t cell        | UCS | -0.172730728 |
| UCK2 | Exhausted cd8+ t cell        | UCS | -0.173162966 |
| UCK2 | Exhausted t cell             | UCS | 0.01147097   |
| UCK2 | Fat cell (adipocyte)         | UCS | -0.039215228 |
| UCK2 | Fatty acid biosynthesis      | UCS | 0.023539692  |
| UCK2 | Fatty acid degradation       | UCS | 0.150644499  |
| UCK2 | Fatty acid elongation        | UCS | 0.423478815  |
| UCK2 | Fibroblast                   | UCS | -0.374877947 |
| UCK2 | Folate biosynthesis          | UCS | 0.264749573  |
| UCK2 | Follicular b cell            | UCS | -0.123123082 |
| UCK2 | Follicular dendritic cell    | UCS | 0.056412438  |
| UCK2 | Follicular helper (tfh) t ce | UCS | -0.068082775 |
| UCK2 | Follicular t cell            | UCS | 0.108564578  |
| UCK2 | Foxp3+il-17+ t cell          | UCS | -0.198839002 |
| UCK2 | Fructose and mannose me      | UCS | 0.268283663  |
| UCK2 | G2m_checkpoint               | UCS | 0.182744275  |
| UCK2 | Galactose metabolism         | UCS | 0.07823448   |
| UCK2 | Galie_tumor_stemness_ge      | UCS | -0.379455396 |
| UCK2 | Glutathione metabolism       | UCS | 0.252997568  |
| UCK2 | Glycerolipid metabolism      | UCS | 0.325842026  |
| UCK2 | Glycerophospholipid metæ     | UCS | 0.081501649  |
| UCK2 | Glycine, serine and threor   | UCS | 0.130228474  |
| UCK2 | Glycolysis / gluconeogene    | UCS | 0.177105531  |
| UCK2 | Glycosaminoglycan biosy      | UCS | -0.177108993 |
| UCK2 | Glycosaminoglycan biosy      | UCS | -0.308639906 |
| UCK2 | Glycosaminoglycan biosy      | UCS | -0.230612774 |
| UCK2 | Glycosaminoglycan degra      | UCS | -0.015698143 |
| UCK2 | Glycosphingolipid biosyn     | UCS | -0.281040415 |
| UCK2 | Glycosphingolipid biosyn     | UCS | -0.143913916 |
| UCK2 | Glycosphingolipid biosyn     | UCS | -0.185546611 |
| UCK2 | Glycosylphosphatidylinos     | UCS | 0.216443428  |
| UCK2 | Glyoxylate and dicarboxy     | UCS | 0.351848648  |
| UCK2 | Granulocyte                  | UCS | -0.086163936 |
| UCK2 | Hedgehog_signaling           | UCS | -0.517033924 |
| UCK2 | Histidine metabolism         | UCS | -0.107354222 |
| UCK2 | Hypoxia                      | UCS | -0.125447008 |
| UCK2 | Il-17ralpha t cell           | UCS | -0.008008    |
| UCK2 | Il2_stat5_signaling          | UCS | -0.115705164 |
| UCK2 | Il6_jak_stat3_signaling      | UCS | -0.109847811 |
| UCK2 | Immune_checkpoints_tur       | UCS | -0.132624158 |
| UCK2 | Immune_inhibition_cytok      | UCS | -0.129176813 |
| UCK2 | Inositol phosphate metabo    | UCS | -0.114669034 |
| UCK2 | Interleukin_6_signaling      | UCS | -0.094275636 |



|      |                             |     |              |
|------|-----------------------------|-----|--------------|
| UCK2 | Jaeger_metastasis_up        | UCS | -0.043158835 |
| UCK2 | Jain_nfkb_signaling         | UCS | 0.616662986  |
| UCK2 | Kras_signaling_up           | UCS | -0.293468148 |
| UCK2 | Linoleic acid metabolism    | UCS | -0.226643147 |
| UCK2 | Lipoic acid metabolism      | UCS | 0.280874229  |
| UCK2 | Lysine degradation          | UCS | 0.228761093  |
| UCK2 | Lysosome                    | UCS | 0.04415088   |
| UCK2 | M1 macrophage               | UCS | -0.098626719 |
| UCK2 | M2 macrophage               | UCS | -0.147685883 |
| UCK2 | Mannose type o-glycan bi    | UCS | -0.031615049 |
| UCK2 | Mapk_signaling_pathway      | UCS | -0.332783489 |
| UCK2 | Mapk3_erk1_activation       | UCS | 0.085933394  |
| UCK2 | Marginal zone b cell        | UCS | 0.009238548  |
| UCK2 | Memory b cell               | UCS | -0.022417008 |
| UCK2 | Mesenchymal cell            | UCS | -0.221024974 |
| UCK2 | Mesenchymal stem cell       | UCS | -0.396307505 |
| UCK2 | Metabolism of xenobiotic    | UCS | 0.128222991  |
| UCK2 | Migrating cancer stem cel   | UCS | -0.096401085 |
| UCK2 | Mitotic_spindle             | UCS | -0.161326464 |
| UCK2 | Monocyte                    | UCS | -0.11581879  |
| UCK2 | Mtor_signaling_pathway      | UCS | -0.054285406 |
| UCK2 | Mtorc1_signaling            | UCS | 0.377190273  |
| UCK2 | Mucin type o-glycan biosy   | UCS | -0.17820987  |
| UCK2 | Myc_targets_v1              | UCS | 0.50221759   |
| UCK2 | Myeloid cell                | UCS | -0.113743313 |
| UCK2 | N-glycan biosynthesis       | UCS | 0.16586415   |
| UCK2 | Naive b cell                | UCS | 0.123036502  |
| UCK2 | Naive cd4+ t cell           | UCS | -0.289588058 |
| UCK2 | Naive cd8+ t cell           | UCS | -0.177845164 |
| UCK2 | Natural killer cell         | UCS | -0.02083896  |
| UCK2 | Natural killer t (nkt) cell | UCS | 0.377336764  |
| UCK2 | Natural regulatory t (treg) | UCS | -0.160153922 |
| UCK2 | Neomycin, kanamycin and     | UCS | -0.121910963 |
| UCK2 | Neutrophil                  | UCS | -0.141304955 |
| UCK2 | Nicotinate and nicotinami   | UCS | -0.041338148 |
| UCK2 | Nitrogen metabolism         | UCS | 0.176351738  |
| UCK2 | Nod_like_receptor_signal    | UCS | -0.00724411  |
| UCK2 | Notch_signaling             | UCS | -0.398535927 |
| UCK2 | One carbon pool by folate   | UCS | 0.314834223  |
| UCK2 | Other glycan degradation    | UCS | 0.048578091  |
| UCK2 | Other types of o-glycan b   | UCS | -0.084676014 |
| UCK2 | Oxidative phosphorylatio    | UCS | 0.392973546  |
| UCK2 | P53_pathway                 | UCS | 0.021278016  |

|      |                            |     |              |
|------|----------------------------|-----|--------------|
| UCK2 | P53_signaling_pathway      | UCS | 0.065664777  |
| UCK2 | Pantothenate and coa bios  | UCS | -0.077648416 |
| UCK2 | Pentose and glucuronate i  | UCS | 0.305538294  |
| UCK2 | Pentose phosphate pathwa   | UCS | 0.415802741  |
| UCK2 | Pericyte                   | UCS | -0.412567955 |
| UCK2 | Phenylalanine metabolism   | UCS | -0.020806823 |
| UCK2 | Phenylalanine, tyrosine ar | UCS | 0.1658265    |
| UCK2 | Phosphonate and phosphir   | UCS | -0.079307755 |
| UCK2 | Pi3k_akt_activation        | UCS | -0.259479315 |
| UCK2 | Pi3k_akt_mtor_signaling    | UCS | 0.103891728  |
| UCK2 | Porphyrin and chlorophyl   | UCS | 0.423653968  |
| UCK2 | Primary bile acid biosynt  | UCS | -0.030771215 |
| UCK2 | Propanoate metabolism      | UCS | 0.143111374  |
| UCK2 | Purine metabolism          | UCS | 0.565438229  |
| UCK2 | Pyrimidine metabolism      | UCS | 0.606909782  |
| UCK2 | Pyruvate metabolism        | UCS | 0.369008742  |
| UCK2 | Regulation_of_autophagy    | UCS | 0.077819278  |
| UCK2 | Retinol metabolism         | UCS | -0.053635265 |
| UCK2 | Riboflavin metabolism      | UCS | 0.136736581  |
| UCK2 | Schmahl_pdgf_signaling     | UCS | -0.382520317 |
| UCK2 | Selenocompound metabol     | UCS | 0.178420827  |
| UCK2 | Signaling_by_hippo         | UCS | -0.178132576 |
| UCK2 | Sphingolipid metabolism    | UCS | -0.044191654 |
| UCK2 | Starch and sucrose metabo  | UCS | -0.141039231 |
| UCK2 | Steroid biosynthesis       | UCS | 0.309647935  |
| UCK2 | Steroid hormone biosynth   | UCS | 0.045919977  |
| UCK2 | Sulfur metabolism          | UCS | 0.263111645  |
| UCK2 | Synthesis and degradation  | UCS | 0.186225266  |
| UCK2 | T helper cell              | UCS | -0.12025705  |
| UCK2 | T helper1 (th1) cell       | UCS | 0.021349961  |
| UCK2 | T helper17 (th17) cell     | UCS | -0.098417047 |
| UCK2 | T helper2 (th2) cell       | UCS | -0.056594329 |
| UCK2 | T helper9 (th9) cell       | UCS | -0.041181344 |
| UCK2 | Taurine and hypotaurine r  | UCS | -0.396242213 |
| UCK2 | Terpenoid backbone biosy   | UCS | 0.40308623   |
| UCK2 | Tgf_beta_signaling_pathw   | UCS | -0.510562297 |
| UCK2 | Thiamine metabolism        | UCS | 0.201853982  |
| UCK2 | Tnfa_signaling_via_nfk     | UCS | -0.154906066 |
| UCK2 | Tryptophan metabolism      | UCS | 0.19381954   |
| UCK2 | Tumor endothelial cell     | UCS | -0.183174269 |
| UCK2 | Tyrosine metabolism        | UCS | -0.113938031 |
| UCK2 | Ubiquinone and other ter   | UCS | 0.342349539  |
| UCK2 | Valine, leucine and isoleu | UCS | 0.084140055  |

|       |                            |     |              |
|-------|----------------------------|-----|--------------|
| UCK2  | Valine, leucine and isoleu | UCS | 0.267433138  |
| UCK2  | Vascular endothelial cell  | UCS | -0.102933141 |
| UCK2  | Vascular smooth muscle c   | UCS | -0.448563751 |
| UCK2  | Vegf_signaling_pathway     | UCS | -0.032711404 |
| UCK2  | Vitamin b6 metabolism      | UCS | -0.157143772 |
| UCK2  | Willert_wnt_signaling      | UCS | 0.064798241  |
| UCK2  | Wnt_beta_catenin_signali   | UCS | -0.402488732 |
| UCKL1 | Abnormal plasma cell       | UCS | -0.230742871 |
| UCKL1 | Activated b cell           | UCS | -0.049938328 |
| UCKL1 | Activated cd4+ t cell      | UCS | -0.092403029 |
| UCKL1 | Activated t cell           | UCS | 0.019814296  |
| UCKL1 | Alanine, aspartate and glu | UCS | -0.037023365 |
| UCKL1 | Alcala_apoptosis           | UCS | 0.118986328  |
| UCKL1 | Alpha-linolenic acid meta  | UCS | -0.088904511 |
| UCKL1 | Amino sugar and nucleoti   | UCS | -0.239208453 |
| UCKL1 | Ampk_pathway               | UCS | 0.090477767  |
| UCKL1 | Angiogenesis               | UCS | -0.211177765 |
| UCKL1 | Arachidonic acid metabol   | UCS | 0.061484404  |
| UCKL1 | Arginine and proline meta  | UCS | -0.139279756 |
| UCKL1 | Arginine biosynthesis      | UCS | 0.276963204  |
| UCKL1 | Ascorbate and aldarate me  | UCS | 0.136428394  |
| UCKL1 | Atypical memory b cell     | UCS | -0.323349345 |
| UCKL1 | Axl+siglec6+ dendritic ce  | UCS | -0.2474769   |
| UCKL1 | B cell                     | UCS | -0.129599445 |
| UCKL1 | B1 cell                    | UCS | -0.062104683 |
| UCKL1 | Basal cell                 | UCS | -0.034963202 |
| UCKL1 | Beta-alanine metabolism    | UCS | -0.38467022  |
| UCKL1 | Biosynthesis of unsaturate | UCS | 0.057872585  |
| UCKL1 | Biotin metabolism          | UCS | -0.209506013 |
| UCKL1 | Butanoate metabolism       | UCS | 0.082604353  |
| UCKL1 | Caffeine metabolism        | UCS | -0.09870603  |
| UCKL1 | Cancer stem cell           | UCS | -0.159251937 |
| UCKL1 | Cancer stem-like cell      | UCS | -0.270783354 |
| UCKL1 | Cd4+ cytotoxic t cell      | UCS | -0.12760816  |
| UCKL1 | Cd4+ memory t cell         | UCS | 0.008364012  |
| UCKL1 | Cd4+ regulatory t cell     | UCS | -0.069739292 |
| UCKL1 | Cd4+ t helper cell         | UCS | 0.05581213   |
| UCKL1 | Cd4+cd25+ regulatory t c   | UCS | 0.027212176  |
| UCKL1 | Cd8+ cytotoxic t cell      | UCS | 0.044648352  |
| UCKL1 | Cd8+ regulatory t cell     | UCS | -0.07350861  |
| UCKL1 | Cell_cycle                 | UCS | -0.135102072 |
| UCKL1 | Chandran_metastasis_top    | UCS | -0.032575063 |
| UCKL1 | Citrate cycle (tca cycle)  | UCS | -0.099587136 |

|       |                             |     |              |
|-------|-----------------------------|-----|--------------|
| UCKL1 | Cysteine and methionine r   | UCS | 0.043199438  |
| UCKL1 | Cytokine induced killer c   | UCS | 0.082662389  |
| UCKL1 | D-arginine and d-ornithin   | UCS | -0.095729362 |
| UCKL1 | D-glutamine and d-glutan    | UCS | 0.125736007  |
| UCKL1 | Dendritic cell              | UCS | -0.140892305 |
| UCKL1 | Dna_repair                  | UCS | 0.147044829  |
| UCKL1 | Dna_replication             | UCS | 0.131661941  |
| UCKL1 | Double-negative memory      | UCS | 0.038121334  |
| UCKL1 | Drug metabolism - cytoch    | UCS | 0.143197784  |
| UCKL1 | Drug metabolism - other c   | UCS | 0.155419598  |
| UCKL1 | E2f_targets                 | UCS | 0.035768728  |
| UCKL1 | Ecm_receptor_interaction    | UCS | -0.22401049  |
| UCKL1 | Effector cd4+ memory t (    | UCS | -0.035644659 |
| UCKL1 | Effector cd8+ memory t (    | UCS | -0.092325008 |
| UCKL1 | Effector memory t cell      | UCS | -0.085002073 |
| UCKL1 | Effector regulatory t (treg | UCS | -0.159608471 |
| UCKL1 | Elvidge_hif1a_targets_up    | UCS | -0.426217594 |
| UCKL1 | Endothelial cell            | UCS | -0.216619598 |
| UCKL1 | Eosinophil                  | UCS | -0.059008567 |
| UCKL1 | Ether lipid metabolism      | UCS | 0.102683035  |
| UCKL1 | Exhausted cd4+ t cell       | UCS | -0.208159546 |
| UCKL1 | Exhausted cd8+ t cell       | UCS | -0.147251899 |
| UCKL1 | Exhausted t cell            | UCS | 0.041052722  |
| UCKL1 | Fat cell (adipocyte)        | UCS | 0.008215895  |
| UCKL1 | Fatty acid biosynthesis     | UCS | -0.234920056 |
| UCKL1 | Fatty acid degradation      | UCS | -0.047481287 |
| UCKL1 | Fatty acid elongation       | UCS | 0.088569565  |
| UCKL1 | Fibroblast                  | UCS | -0.233308015 |
| UCKL1 | Folate biosynthesis         | UCS | 0.03086803   |
| UCKL1 | Follicular b cell           | UCS | 0.013677097  |
| UCKL1 | Follicular dendritic cell   | UCS | -0.104438559 |
| UCKL1 | Follicular helper (tfh) t c | UCS | -0.092005317 |
| UCKL1 | Follicular t cell           | UCS | 0.040658337  |
| UCKL1 | Foxp3+il-17+ t cell         | UCS | -0.132006606 |
| UCKL1 | Fructose and mannose me     | UCS | 0.146112025  |
| UCKL1 | G2m_checkpoint              | UCS | -0.079260943 |
| UCKL1 | Galactose metabolism        | UCS | 0.02945463   |
| UCKL1 | Galie_tumor_stemness_ge     | UCS | -0.173127299 |
| UCKL1 | Glutathione metabolism      | UCS | -0.05692901  |
| UCKL1 | Glycerolipid metabolism     | UCS | 0.126364517  |
| UCKL1 | Glycerophospholipid met     | UCS | 0.168856828  |
| UCKL1 | Glycine, serine and threor  | UCS | -0.089766601 |
| UCKL1 | Glycolysis / gluconeogene   | UCS | 0.113427485  |

|       |                           |     |              |
|-------|---------------------------|-----|--------------|
| UCKL1 | Glycosaminoglycan biosyn  | UCS | -0.202187123 |
| UCKL1 | Glycosaminoglycan biosyn  | UCS | -0.264084383 |
| UCKL1 | Glycosaminoglycan biosyn  | UCS | -0.271709613 |
| UCKL1 | Glycosaminoglycan degra   | UCS | -0.193368768 |
| UCKL1 | Glycosphingolipid biosyn  | UCS | -0.371702667 |
| UCKL1 | Glycosphingolipid biosyn  | UCS | -0.11048885  |
| UCKL1 | Glycosphingolipid biosyn  | UCS | -0.122708146 |
| UCKL1 | Glycosylphosphatidylinos  | UCS | 0.047267222  |
| UCKL1 | Glyoxylate and dicarboxy  | UCS | 0.101564434  |
| UCKL1 | Granulocyte               | UCS | -0.109010373 |
| UCKL1 | Hedgehog_signaling        | UCS | -0.207155747 |
| UCKL1 | Histidine metabolism      | UCS | -0.107683706 |
| UCKL1 | Hypoxia                   | UCS | -0.121344675 |
| UCKL1 | Il-17alpha t cell         | UCS | 0.094204479  |
| UCKL1 | Il2_stat5_signaling       | UCS | -0.194476456 |
| UCKL1 | Il6_jak_stat3_signaling   | UCS | -0.216733957 |
| UCKL1 | Immune_checkpoints_tun    | UCS | -0.13032186  |
| UCKL1 | Immune_inhibition_cytok   | UCS | -0.183831077 |
| UCKL1 | Inositol phosphate metabo | UCS | -0.40717546  |
| UCKL1 | Interleukin_6_signaling   | UCS | -0.137517748 |
| UCKL1 | Jaeger_metastasis_up      | UCS | -0.321467802 |
| UCKL1 | Jain_nfkb_signaling       | UCS | 0.136527979  |
| UCKL1 | Kras_signaling_up         | UCS | -0.172588352 |
| UCKL1 | Linoleic acid metabolism  | UCS | 0.029104099  |
| UCKL1 | Lipoic acid metabolism    | UCS | 0.125402557  |
| UCKL1 | Lysine degradation        | UCS | -0.030029821 |
| UCKL1 | Lysosome                  | UCS | -0.168715685 |
| UCKL1 | M1 macrophage             | UCS | -0.110804744 |
| UCKL1 | M2 macrophage             | UCS | -0.131697956 |
| UCKL1 | Mannose type o-glycan bi  | UCS | 0.043895361  |
| UCKL1 | Mapk_signaling_pathway    | UCS | -0.266139329 |
| UCKL1 | Mapk3_erk1_activation     | UCS | -0.112619429 |
| UCKL1 | Marginal zone b cell      | UCS | -0.074406824 |
| UCKL1 | Memory b cell             | UCS | 0.035095342  |
| UCKL1 | Mesenchymal cell          | UCS | -0.136547906 |
| UCKL1 | Mesenchymal stem cell     | UCS | -0.233333705 |
| UCKL1 | Metabolism of xenobiotic  | UCS | 0.183198222  |
| UCKL1 | Migrating cancer stem cel | UCS | -0.207793508 |
| UCKL1 | Mitotic_spindle           | UCS | -0.211305557 |
| UCKL1 | Monocyte                  | UCS | -0.10495194  |
| UCKL1 | Mtor_signaling_pathway    | UCS | -0.023218868 |
| UCKL1 | Mtorc1_signaling          | UCS | -0.117944591 |
| UCKL1 | Mucin type o-glycan bios  | UCS | -0.20141602  |

|       |                             |     |              |
|-------|-----------------------------|-----|--------------|
| UCKL1 | Myc_targets_v1              | UCS | 0.068295289  |
| UCKL1 | Myeloid cell                | UCS | -0.114498577 |
| UCKL1 | N-glycan biosynthesis       | UCS | -0.149454114 |
| UCKL1 | Naive b cell                | UCS | -0.055673034 |
| UCKL1 | Naive cd4+ t cell           | UCS | -0.238399135 |
| UCKL1 | Naive cd8+ t cell           | UCS | 0.023925417  |
| UCKL1 | Natural killer cell         | UCS | -0.025976118 |
| UCKL1 | Natural killer t (nkt) cell | UCS | 0.056831729  |
| UCKL1 | Natural regulatory t (treg) | UCS | -0.112713283 |
| UCKL1 | Neomycin, kanamycin and     | UCS | 0.254130921  |
| UCKL1 | Neutrophil                  | UCS | -0.141127917 |
| UCKL1 | Nicotinate and nicotinami   | UCS | -0.053720783 |
| UCKL1 | Nitrogen metabolism         | UCS | -0.124037985 |
| UCKL1 | Nod_like_receptor_signal    | UCS | -0.071916647 |
| UCKL1 | Notch_signaling             | UCS | -0.046381112 |
| UCKL1 | One carbon pool by folate   | UCS | -0.069946229 |
| UCKL1 | Other glycan degradation    | UCS | 0.026227891  |
| UCKL1 | Other types of o-glycan b   | UCS | 0.370579214  |
| UCKL1 | Oxidative phosphorylatio    | UCS | 0.0559944    |
| UCKL1 | P53_pathway                 | UCS | -0.12623294  |
| UCKL1 | P53_signaling_pathway       | UCS | -0.495719755 |
| UCKL1 | Pantothenate and coa bios   | UCS | -0.1054734   |
| UCKL1 | Pentose and glucuronate i   | UCS | 0.12954507   |
| UCKL1 | Pentose phosphate pathwa    | UCS | 0.216631708  |
| UCKL1 | Pericyte                    | UCS | -0.156419133 |
| UCKL1 | Phenylalanine metabolism    | UCS | 0.007615594  |
| UCKL1 | Phenylalanine, tyrosine ar  | UCS | 0.17582912   |
| UCKL1 | Phosphonate and phosphir    | UCS | 0.069841052  |
| UCKL1 | Pi3k_akt_activation         | UCS | -0.21704308  |
| UCKL1 | Pi3k_akt_mtor_signaling     | UCS | -0.169523878 |
| UCKL1 | Porphyrin and chlorophyl    | UCS | 0.14482986   |
| UCKL1 | Primary bile acid biosynt   | UCS | -0.00967533  |
| UCKL1 | Propanoate metabolism       | UCS | 0.012557405  |
| UCKL1 | Purine metabolism           | UCS | -0.029959399 |
| UCKL1 | Pyrimidine metabolism       | UCS | 0.117797883  |
| UCKL1 | Pyruvate metabolism         | UCS | 0.020158094  |
| UCKL1 | Regulation_of_autophagy     | UCS | 0.025713257  |
| UCKL1 | Retinol metabolism          | UCS | 0.152833096  |
| UCKL1 | Riboflavin metabolism       | UCS | -0.136714386 |
| UCKL1 | Schmahl_pdgf_signaling      | UCS | -0.334064502 |
| UCKL1 | Selenocompound metabol      | UCS | 0.051673538  |
| UCKL1 | Signaling_by_hippo          | UCS | -0.097839815 |
| UCKL1 | Sphingolipid metabolism     | UCS | -0.108745315 |

|       |                            |     |              |
|-------|----------------------------|-----|--------------|
| UCKL1 | Starch and sucrose metabo  | UCS | -0.288512852 |
| UCKL1 | Steroid biosynthesis       | UCS | 0.178307404  |
| UCKL1 | Steroid hormone biosynth   | UCS | 0.244357805  |
| UCKL1 | Sulfur metabolism          | UCS | -0.156458929 |
| UCKL1 | Synthesis and degradation  | UCS | 0.076064848  |
| UCKL1 | T helper cell              | UCS | -0.0873758   |
| UCKL1 | T helper1 (th1) cell       | UCS | 0.037999689  |
| UCKL1 | T helper17 (th17) cell     | UCS | -0.07445234  |
| UCKL1 | T helper2 (th2) cell       | UCS | 0.013079115  |
| UCKL1 | T helper9 (th9) cell       | UCS | 0.108451571  |
| UCKL1 | Taurine and hypotaurine r  | UCS | 0.039940338  |
| UCKL1 | Terpenoid backbone biosy   | UCS | 0.021903503  |
| UCKL1 | Tgf_beta_signaling_pathw   | UCS | -0.220686157 |
| UCKL1 | Thiamine metabolism        | UCS | 0.003090234  |
| UCKL1 | Tnfa_signaling_via_nfkb    | UCS | -0.138314945 |
| UCKL1 | Tryptophan metabolism      | UCS | 0.115605811  |
| UCKL1 | Tumor endothelial cell     | UCS | 0.107839536  |
| UCKL1 | Tyrosine metabolism        | UCS | 0.04668875   |
| UCKL1 | Ubiquinone and other terp  | UCS | 0.220001916  |
| UCKL1 | Valine, leucine and isoleu | UCS | 0.055292969  |
| UCKL1 | Valine, leucine and isoleu | UCS | 0.165127041  |
| UCKL1 | Vascular endothelial cell  | UCS | -0.208788023 |
| UCKL1 | Vascular smooth muscle c   | UCS | -0.043681645 |
| UCKL1 | Vegf_signaling_pathway     | UCS | 0.029885564  |
| UCKL1 | Vitamin b6 metabolism      | UCS | -0.052586528 |
| UCKL1 | Willert_wnt_signaling      | UCS | 0.094936845  |
| UCKL1 | Wnt_beta_catenin_signali   | UCS | -0.228507972 |
| UPP1  | Abnormal plasma cell       | UCS | -0.069690318 |
| UPP1  | Activated b cell           | UCS | 0.457910351  |
| UPP1  | Activated cd4+ t cell      | UCS | 0.427205582  |
| UPP1  | Activated t cell           | UCS | 0.423411488  |
| UPP1  | Alanine, aspartate and glu | UCS | -0.036759936 |
| UPP1  | Alcala_apoptosis           | UCS | 0.440828791  |
| UPP1  | Alpha-linolenic acid meta  | UCS | 0.405498072  |
| UPP1  | Amino sugar and nucleoti   | UCS | 0.443833227  |
| UPP1  | Ampk_pathway               | UCS | -0.358073916 |
| UPP1  | Angiogenesis               | UCS | 0.298259477  |
| UPP1  | Arachidonic acid metaboli  | UCS | 0.573673367  |
| UPP1  | Arginine and proline metæ  | UCS | 0.099355908  |
| UPP1  | Arginine biosynthesis      | UCS | -0.085557522 |
| UPP1  | Ascorbate and aldarate mε  | UCS | 0.283231975  |
| UPP1  | Atypical memory b cell     | UCS | 0.193275845  |
| UPP1  | Axl+siglec6+ dendritic ce  | UCS | 0.16473884   |

|      |                                      |     |              |
|------|--------------------------------------|-----|--------------|
| UPP1 | B cell                               | UCS | 0.498235192  |
| UPP1 | B1 cell                              | UCS | 0.222635262  |
| UPP1 | Basal cell                           | UCS | 0.431965277  |
| UPP1 | Beta-alanine metabolism              | UCS | 0.021619736  |
| UPP1 | Biosynthesis of unsaturate           | UCS | 0.238531491  |
| UPP1 | Biotin metabolism                    | UCS | -0.030810543 |
| UPP1 | Butanoate metabolism                 | UCS | 0.212173055  |
| UPP1 | Caffeine metabolism                  | UCS | 0.235857126  |
| UPP1 | Cancer stem cell                     | UCS | 0.416211319  |
| UPP1 | Cancer stem-like cell                | UCS | 0.307681388  |
| UPP1 | Cd4+ cytotoxic t cell                | UCS | 0.445087077  |
| UPP1 | Cd4+ memory t cell                   | UCS | 0.258916314  |
| UPP1 | Cd4+ regulatory t cell               | UCS | 0.486777909  |
| UPP1 | Cd4+ t helper cell                   | UCS | 0.401615669  |
| UPP1 | Cd4+cd25+ regulatory t c             | UCS | 0.423835994  |
| UPP1 | Cd8+ cytotoxic t cell                | UCS | 0.432994862  |
| UPP1 | Cd8+ regulatory t cell               | UCS | 0.322042092  |
| UPP1 | Cell_cycle                           | UCS | -0.228394386 |
| UPP1 | Chandran_metastasis_top <sup>2</sup> | UCS | -0.322202916 |
| UPP1 | Citrate cycle (tca cycle)            | UCS | 0.005974483  |
| UPP1 | Cysteine and methionine r            | UCS | 0.225372197  |
| UPP1 | Cytokine induced killer c $\alpha$   | UCS | -0.038787963 |
| UPP1 | D-arginine and d-ornithin            | UCS | -0.002218837 |
| UPP1 | D-glutamine and d-glutan             | UCS | -0.061769855 |
| UPP1 | Dendritic cell                       | UCS | 0.461759701  |
| UPP1 | Dna_repair                           | UCS | 0.116645932  |
| UPP1 | Dna_replication                      | UCS | 0.007837177  |
| UPP1 | Double-negative memory               | UCS | 0.20733983   |
| UPP1 | Drug metabolism - cytoch             | UCS | 0.32602366   |
| UPP1 | Drug metabolism - other $\alpha$     | UCS | 0.408937723  |
| UPP1 | E2f_targets                          | UCS | -0.122984943 |
| UPP1 | Ecm_receptor_interaction             | UCS | 0.15040623   |
| UPP1 | Effector cd4+ memory t (             | UCS | 0.261349818  |
| UPP1 | Effector cd8+ memory t (             | UCS | 0.526303795  |
| UPP1 | Effector memory t cell               | UCS | 0.379965995  |
| UPP1 | Effector regulatory t (treg          | UCS | 0.262983334  |
| UPP1 | Elvidge_hif1a_targets_up             | UCS | -0.142406943 |
| UPP1 | Endothelial cell                     | UCS | 0.14662831   |
| UPP1 | Eosinophil                           | UCS | 0.501322122  |
| UPP1 | Ether lipid metabolism               | UCS | 0.443405762  |
| UPP1 | Exhausted cd4+ t cell                | UCS | 0.463967316  |
| UPP1 | Exhausted cd8+ t cell                | UCS | 0.548514853  |
| UPP1 | Exhausted t cell                     | UCS | 0.411521915  |



|      |                                |     |              |
|------|--------------------------------|-----|--------------|
| UPP1 | Fat cell (adipocyte)           | UCS | -0.217087953 |
| UPP1 | Fatty acid biosynthesis        | UCS | -0.091644811 |
| UPP1 | Fatty acid degradation         | UCS | 0.094706808  |
| UPP1 | Fatty acid elongation          | UCS | 0.24258945   |
| UPP1 | Fibroblast                     | UCS | 0.116424157  |
| UPP1 | Folate biosynthesis            | UCS | 0.216327477  |
| UPP1 | Follicular b cell              | UCS | 0.39250832   |
| UPP1 | Follicular dendritic cell      | UCS | 0.35078239   |
| UPP1 | Follicular helper (tfh) t cell | UCS | 0.322569656  |
| UPP1 | Follicular t cell              | UCS | 0.265047626  |
| UPP1 | Foxp3+il-17+ t cell            | UCS | 0.327066994  |
| UPP1 | Fructose and mannose me        | UCS | 0.380269308  |
| UPP1 | G2m_checkpoint                 | UCS | -0.22776894  |
| UPP1 | Galactose metabolism           | UCS | 0.568612569  |
| UPP1 | Galie_tumor_stemness_ge        | UCS | 0.084543177  |
| UPP1 | Glutathione metabolism         | UCS | 0.451095315  |
| UPP1 | Glycerolipid metabolism        | UCS | 0.448537892  |
| UPP1 | Glycerophospholipid met        | UCS | 0.426828286  |
| UPP1 | Glycine, serine and threo      | UCS | 0.255604861  |
| UPP1 | Glycolysis / gluconeogene      | UCS | 0.202877472  |
| UPP1 | Glycosaminoglycan biosy        | UCS | 0.036913206  |
| UPP1 | Glycosaminoglycan biosy        | UCS | -0.087177374 |
| UPP1 | Glycosaminoglycan biosy        | UCS | 0.364724289  |
| UPP1 | Glycosaminoglycan degra        | UCS | 0.332356753  |
| UPP1 | Glycosphingolipid biosyn       | UCS | 0.395190625  |
| UPP1 | Glycosphingolipid biosyn       | UCS | 0.519789675  |
| UPP1 | Glycosphingolipid biosyn       | UCS | 0.383382221  |
| UPP1 | Glycosylphosphatidylinos       | UCS | 0.153026441  |
| UPP1 | Glyoxylate and dicarboxy       | UCS | 0.09533067   |
| UPP1 | Granulocyte                    | UCS | 0.413313734  |
| UPP1 | Hedgehog_signaling             | UCS | 0.006844266  |
| UPP1 | Histidine metabolism           | UCS | 0.288531117  |
| UPP1 | Hypoxia                        | UCS | 0.491828254  |
| UPP1 | Il-17alpha t cell              | UCS | 0.359179084  |
| UPP1 | Il2_stat5_signaling            | UCS | 0.507453474  |
| UPP1 | Il6_jak_stat3_signaling        | UCS | 0.551897029  |
| UPP1 | Immune_checkpoints_tur         | UCS | 0.567081073  |
| UPP1 | Immune_inhibition_cytok        | UCS | 0.461311471  |
| UPP1 | Inositol phosphate metabo      | UCS | -0.045654024 |
| UPP1 | Interleukin_6_signaling        | UCS | 0.1529474    |
| UPP1 | Jaeger_metastasis_up           | UCS | 0.016795581  |
| UPP1 | Jain_nfkb_signaling            | UCS | 0.224926175  |
| UPP1 | Kras_signaling_up              | UCS | 0.545321233  |

|      |                                          |     |              |
|------|------------------------------------------|-----|--------------|
| UPP1 | Linoleic acid metabolism                 | UCS | 0.237404711  |
| UPP1 | Lipoic acid metabolism                   | UCS | -0.149792833 |
| UPP1 | Lysine degradation                       | UCS | -0.182744258 |
| UPP1 | Lysosome                                 | UCS | 0.54894114   |
| UPP1 | M1 macrophage                            | UCS | 0.531794553  |
| UPP1 | M2 macrophage                            | UCS | 0.46607657   |
| UPP1 | Mannose type o-glycan biosynthesis       | UCS | 0.175688708  |
| UPP1 | Mapk_signaling_pathway                   | UCS | 0.026170567  |
| UPP1 | Mapk3_erk1_activation                    | UCS | -0.126142631 |
| UPP1 | Marginal zone b cell                     | UCS | 0.410684811  |
| UPP1 | Memory b cell                            | UCS | 0.377146925  |
| UPP1 | Mesenchymal cell                         | UCS | 0.051553032  |
| UPP1 | Mesenchymal stem cell                    | UCS | 0.293869663  |
| UPP1 | Metabolism of xenobiotics                | UCS | 0.358718822  |
| UPP1 | Migrating cancer stem cell               | UCS | 0.563127308  |
| UPP1 | Mitotic_spindle                          | UCS | -0.208968507 |
| UPP1 | Monocyte                                 | UCS | 0.617007327  |
| UPP1 | Mtor_signaling_pathway                   | UCS | -0.019733067 |
| UPP1 | Mtorc1_signaling                         | UCS | 0.294101127  |
| UPP1 | Mucin type o-glycan biosynthesis         | UCS | 0.407603075  |
| UPP1 | Myc_targets_v1                           | UCS | 0.051699659  |
| UPP1 | Myeloid cell                             | UCS | 0.4444847    |
| UPP1 | N-glycan biosynthesis                    | UCS | 0.421465767  |
| UPP1 | Naive b cell                             | UCS | 0.484725845  |
| UPP1 | Naive cd4+ t cell                        | UCS | 0.437576916  |
| UPP1 | Naive cd8+ t cell                        | UCS | 0.33932204   |
| UPP1 | Natural killer cell                      | UCS | 0.451675522  |
| UPP1 | Natural killer t (nkt) cell              | UCS | 0.482944412  |
| UPP1 | Natural regulatory t (treg) cell         | UCS | 0.517263162  |
| UPP1 | Neomycin, kanamycin and streptomycin     | UCS | 0.223916451  |
| UPP1 | Neutrophil                               | UCS | 0.634005314  |
| UPP1 | Nicotinate and nicotinamide              | UCS | 0.379481543  |
| UPP1 | Nitrogen metabolism                      | UCS | 0.296270261  |
| UPP1 | Nod_like_receptor_signaling              | UCS | 0.505276229  |
| UPP1 | Notch_signaling                          | UCS | 0.104301443  |
| UPP1 | One carbon pool by folate                | UCS | 0.083429527  |
| UPP1 | Other glycan degradation                 | UCS | 0.36657993   |
| UPP1 | Other types of o-glycan biosynthesis     | UCS | 0.062343295  |
| UPP1 | Oxidative phosphorylation                | UCS | 0.156959827  |
| UPP1 | P53_pathway                              | UCS | 0.501440841  |
| UPP1 | P53_signaling_pathway                    | UCS | -0.026014726 |
| UPP1 | Pantothenate and coa biosynthesis        | UCS | 0.091545147  |
| UPP1 | Pentose and glucuronate interconversions | UCS | 0.281977982  |

|      |                            |     |              |
|------|----------------------------|-----|--------------|
| UPP1 | Pentose phosphate pathwa   | UCS | 0.408773668  |
| UPP1 | Pericyte                   | UCS | -0.120122168 |
| UPP1 | Phenylalanine metabolism   | UCS | 0.298998296  |
| UPP1 | Phenylalanine, tyrosine ar | UCS | 0.209141913  |
| UPP1 | Phosphonate and phosphir   | UCS | -0.021433114 |
| UPP1 | Pi3k_akt_activation        | UCS | -0.032986105 |
| UPP1 | Pi3k_akt_mtor_signaling    | UCS | 0.288897402  |
| UPP1 | Porphyrin and chlorophyl   | UCS | 0.26408889   |
| UPP1 | Primary bile acid biosynt  | UCS | 0.025390613  |
| UPP1 | Propanoate metabolism      | UCS | -0.284575129 |
| UPP1 | Purine metabolism          | UCS | 0.091911222  |
| UPP1 | Pyrimidine metabolism      | UCS | 0.255158539  |
| UPP1 | Pyruvate metabolism        | UCS | -0.04071919  |
| UPP1 | Regulation_of_autophagy    | UCS | 0.058206844  |
| UPP1 | Retinol metabolism         | UCS | 0.301497143  |
| UPP1 | Riboflavin metabolism      | UCS | 0.558525967  |
| UPP1 | Schmahl_pdgf_signaling     | UCS | 0.174721639  |
| UPP1 | Selenocompound metabol     | UCS | -0.012111119 |
| UPP1 | Signaling_by_hippo         | UCS | -0.114359723 |
| UPP1 | Sphingolipid metabolism    | UCS | 0.535012913  |
| UPP1 | Starch and sucrose metabo  | UCS | 0.078783592  |
| UPP1 | Steroid biosynthesis       | UCS | 0.296372733  |
| UPP1 | Steroid hormone biosynth   | UCS | 0.171936394  |
| UPP1 | Sulfur metabolism          | UCS | 0.292494166  |
| UPP1 | Synthesis and degradation  | UCS | 0.213285566  |
| UPP1 | T helper cell              | UCS | 0.421627591  |
| UPP1 | T helper1 (th1) cell       | UCS | 0.578462925  |
| UPP1 | T helper17 (th17) cell     | UCS | 0.490793194  |
| UPP1 | T helper2 (th2) cell       | UCS | 0.469402271  |
| UPP1 | T helper9 (th9) cell       | UCS | 0.524243743  |
| UPP1 | Taurine and hypotaurine r  | UCS | 0.134036885  |
| UPP1 | Terpenoid backbone biosy   | UCS | 0.06147605   |
| UPP1 | Tgf_beta_signaling_pathw   | UCS | -0.19198809  |
| UPP1 | Thiamine metabolism        | UCS | 0.086225929  |
| UPP1 | Tnfa_signaling_via_nfkb    | UCS | 0.555559498  |
| UPP1 | Tryptophan metabolism      | UCS | 0.236888942  |
| UPP1 | Tumor endothelial cell     | UCS | 0.190182488  |
| UPP1 | Tyrosine metabolism        | UCS | 0.242562333  |
| UPP1 | Ubiquinone and other ter   | UCS | 0.122795032  |
| UPP1 | Valine, leucine and isoleu | UCS | 0.349162187  |
| UPP1 | Valine, leucine and isoleu | UCS | 0.070611557  |
| UPP1 | Vascular endothelial cell  | UCS | 0.213103798  |
| UPP1 | Vascular smooth muscle c   | UCS | 0.082015355  |

|      |                                      |     |              |
|------|--------------------------------------|-----|--------------|
| UPP1 | Vegf_signaling_pathway               | UCS | 0.463696446  |
| UPP1 | Vitamin b6 metabolism                | UCS | 0.214135247  |
| UPP1 | Willert_wnt_signaling                | UCS | 0.420011033  |
| UPP1 | Wnt_beta_catenin_signali             | UCS | -0.238774715 |
| UPP2 | Abnormal plasma cell                 | UCS | -0.044659366 |
| UPP2 | Activated b cell                     | UCS | -0.057857096 |
| UPP2 | Activated cd4+ t cell                | UCS | -0.061654943 |
| UPP2 | Activated t cell                     | UCS | -0.006957771 |
| UPP2 | Alanine, aspartate and glu           | UCS | -0.049885884 |
| UPP2 | Alcala_apoptosis                     | UCS | 0.15776006   |
| UPP2 | Alpha-linolenic acid meta            | UCS | 0.209495385  |
| UPP2 | Amino sugar and nucleoti             | UCS | 0.026527005  |
| UPP2 | Ampk_pathway                         | UCS | -0.014910925 |
| UPP2 | Angiogenesis                         | UCS | -0.187633893 |
| UPP2 | Arachidonic acid metaboli            | UCS | 0.150201869  |
| UPP2 | Arginine and proline metε            | UCS | 0.021903107  |
| UPP2 | Arginine biosynthesis                | UCS | 0.042741731  |
| UPP2 | Ascorbate and aldarate mε            | UCS | 0.077255743  |
| UPP2 | Atypical memory b cell               | UCS | -0.240182235 |
| UPP2 | Axl+siglec6+ dendritic ce            | UCS | -0.198085987 |
| UPP2 | B cell                               | UCS | -0.024979372 |
| UPP2 | B1 cell                              | UCS | -0.027772179 |
| UPP2 | Basal cell                           | UCS | 0.107729398  |
| UPP2 | Beta-alanine metabolism              | UCS | 0.090598981  |
| UPP2 | Biosynthesis of unsaturate           | UCS | -0.036884969 |
| UPP2 | Biotin metabolism                    | UCS | 0.072300756  |
| UPP2 | Butanoate metabolism                 | UCS | 0.177630838  |
| UPP2 | Caffeine metabolism                  | UCS | 0.187849846  |
| UPP2 | Cancer stem cell                     | UCS | -0.10236932  |
| UPP2 | Cancer stem-like cell                | UCS | -0.025850475 |
| UPP2 | Cd4+ cytotoxic t cell                | UCS | -0.093971244 |
| UPP2 | Cd4+ memory t cell                   | UCS | 0.029235327  |
| UPP2 | Cd4+ regulatory t cell               | UCS | -0.004296066 |
| UPP2 | Cd4+ t helper cell                   | UCS | 0.03593019   |
| UPP2 | Cd4+cd25+ regulatory t c             | UCS | 0.021967781  |
| UPP2 | Cd8+ cytotoxic t cell                | UCS | 0.007039188  |
| UPP2 | Cd8+ regulatory t cell               | UCS | -0.067113004 |
| UPP2 | Cell_cycle                           | UCS | -0.321270231 |
| UPP2 | Chandran_metastasis_top <sup>5</sup> | UCS | -0.213752929 |
| UPP2 | Citrate cycle (tca cycle)            | UCS | -0.001219553 |
| UPP2 | Cysteine and methionine r            | UCS | -0.035329304 |
| UPP2 | Cytokine induced killer cε           | UCS | -0.06608313  |
| UPP2 | D-arginine and d-ornithin            | UCS | 0.191468303  |

|      |                                  |              |
|------|----------------------------------|--------------|
| UPP2 | D-glutamine and d-glutan UCS     | -0.193636419 |
| UPP2 | Dendritic cell UCS               | -0.069933211 |
| UPP2 | Dna_repair UCS                   | 0.094604987  |
| UPP2 | Dna_replication UCS              | -0.028049423 |
| UPP2 | Double-negative memory UCS       | 0.025663687  |
| UPP2 | Drug metabolism - cytoch UCS     | 0.23927551   |
| UPP2 | Drug metabolism - other UCS      | 0.245234158  |
| UPP2 | E2f_targets UCS                  | -0.167305639 |
| UPP2 | Ecm_receptor_interaction UCS     | -0.247859379 |
| UPP2 | Effector cd4+ memory t ( UCS     | -0.066236377 |
| UPP2 | Effector cd8+ memory t ( UCS     | -0.101254589 |
| UPP2 | Effector memory t cell UCS       | -0.020471604 |
| UPP2 | Effector regulatory t (treg UCS  | -0.137865078 |
| UPP2 | Elvidge_hif1a_targets_up UCS     | -0.210477788 |
| UPP2 | Endothelial cell UCS             | -0.29340542  |
| UPP2 | Eosinophil UCS                   | -0.068356342 |
| UPP2 | Ether lipid metabolism UCS       | 0.048429744  |
| UPP2 | Exhausted cd4+ t cell UCS        | -0.18529731  |
| UPP2 | Exhausted cd8+ t cell UCS        | -0.112463671 |
| UPP2 | Exhausted t cell UCS             | 0.036220856  |
| UPP2 | Fat cell (adipocyte) UCS         | 0.029530361  |
| UPP2 | Fatty acid biosynthesis UCS      | 0.066203764  |
| UPP2 | Fatty acid degradation UCS       | 0.122808474  |
| UPP2 | Fatty acid elongation UCS        | 0.108910452  |
| UPP2 | Fibroblast UCS                   | -0.314020308 |
| UPP2 | Folate biosynthesis UCS          | 0.124238567  |
| UPP2 | Follicular b cell UCS            | -0.098325225 |
| UPP2 | Follicular dendritic cell UCS    | -0.105479186 |
| UPP2 | Follicular helper (tfh) t ce UCS | -0.092811909 |
| UPP2 | Follicular t cell UCS            | 0.054092356  |
| UPP2 | Foxp3+il-17+ t cell UCS          | -0.109859204 |
| UPP2 | Fructose and mannose me UCS      | 0.116862911  |
| UPP2 | G2m_checkpoint UCS               | -0.264005791 |
| UPP2 | Galactose metabolism UCS         | 0.08374174   |
| UPP2 | Galie_tumor_stemness_ge UCS      | -0.219774541 |
| UPP2 | Glutathione metabolism UCS       | 0.280327279  |
| UPP2 | Glycerolipid metabolism UCS      | 0.317385473  |
| UPP2 | Glycerophospholipid metæ UCS     | 0.372161468  |
| UPP2 | Glycine, serine and threor UCS   | -0.02839132  |
| UPP2 | Glycolysis / gluconeogene UCS    | -0.051004327 |
| UPP2 | Glycosaminoglycan biosy UCS      | 0.035432453  |
| UPP2 | Glycosaminoglycan biosy UCS      | -0.068019027 |
| UPP2 | Glycosaminoglycan biosy UCS      | -0.011599009 |

|      |                           |     |              |
|------|---------------------------|-----|--------------|
| UPP2 | Glycosaminoglycan degra   | UCS | 0.013739611  |
| UPP2 | Glycosphingolipid biosyn  | UCS | -0.084869591 |
| UPP2 | Glycosphingolipid biosyn  | UCS | -0.02786054  |
| UPP2 | Glycosphingolipid biosyn  | UCS | 0.148113385  |
| UPP2 | Glycosylphosphatidylinos  | UCS | 0.135875664  |
| UPP2 | Glyoxylate and dicarboxy  | UCS | 0.182215672  |
| UPP2 | Granulocyte               | UCS | -0.07690348  |
| UPP2 | Hedgehog_signaling        | UCS | -0.215735922 |
| UPP2 | Histidine metabolism      | UCS | 0.074341111  |
| UPP2 | Hypoxia                   | UCS | -0.071939059 |
| UPP2 | Il-17alpha t cell         | UCS | 0.048314219  |
| UPP2 | Il2_stat5_signaling       | UCS | -0.012469894 |
| UPP2 | Il6_jak_stat3_signaling   | UCS | -0.097145528 |
| UPP2 | Immune_checkpoints_tur    | UCS | 0.017703643  |
| UPP2 | Immune_inhibition_cytok   | UCS | -0.051710368 |
| UPP2 | Inositol phosphate metabo | UCS | -0.173923963 |
| UPP2 | Interleukin_6_signaling   | UCS | -0.20379825  |
| UPP2 | Jaeger_metastasis_up      | UCS | -0.446498063 |
| UPP2 | Jain_nfkb_signaling       | UCS | -0.091378395 |
| UPP2 | Kras_signaling_up         | UCS | -0.107739878 |
| UPP2 | Linoleic acid metabolism  | UCS | 0.302160065  |
| UPP2 | Lipoic acid metabolism    | UCS | 0.191820163  |
| UPP2 | Lysine degradation        | UCS | -0.065434449 |
| UPP2 | Lysosome                  | UCS | 0.03396292   |
| UPP2 | M1 macrophage             | UCS | -0.062150778 |
| UPP2 | M2 macrophage             | UCS | -0.136449382 |
| UPP2 | Mannose type o-glycan bi  | UCS | 0.132271728  |
| UPP2 | Mapk_signaling_pathway    | UCS | -0.186535257 |
| UPP2 | Mapk3_erk1_activation     | UCS | -0.216128807 |
| UPP2 | Marginal zone b cell      | UCS | 0.050846014  |
| UPP2 | Memory b cell             | UCS | -0.05083754  |
| UPP2 | Mesenchymal cell          | UCS | -0.181736278 |
| UPP2 | Mesenchymal stem cell     | UCS | -0.262588358 |
| UPP2 | Metabolism of xenobiotic  | UCS | 0.285641467  |
| UPP2 | Migrating cancer stem cel | UCS | 0.121106683  |
| UPP2 | Mitotic_spindle           | UCS | -0.254623423 |
| UPP2 | Monocyte                  | UCS | -0.051082164 |
| UPP2 | Mtor_signaling_pathway    | UCS | -0.005550979 |
| UPP2 | Mtorc1_signaling          | UCS | -0.051594864 |
| UPP2 | Mucin type o-glycan biosy | UCS | -0.012381845 |
| UPP2 | Myc_targets_v1            | UCS | -0.029658666 |
| UPP2 | Myeloid cell              | UCS | -0.11743896  |
| UPP2 | N-glycan biosynthesis     | UCS | 0.002429906  |

|      |                             |     |              |
|------|-----------------------------|-----|--------------|
| UPP2 | Naive b cell                | UCS | -0.005396557 |
| UPP2 | Naive cd4+ t cell           | UCS | -0.059737991 |
| UPP2 | Naive cd8+ t cell           | UCS | 0.145151894  |
| UPP2 | Natural killer cell         | UCS | -0.064860048 |
| UPP2 | Natural killer t (nkt) cell | UCS | 0.006693232  |
| UPP2 | Natural regulatory t (treg) | UCS | 0.017044539  |
| UPP2 | Neomycin, kanamycin and     | UCS | -0.092688458 |
| UPP2 | Neutrophil                  | UCS | -0.011721867 |
| UPP2 | Nicotinate and nicotinami   | UCS | 0.173080675  |
| UPP2 | Nitrogen metabolism         | UCS | 0.12958218   |
| UPP2 | Nod_like_receptor_signal    | UCS | -0.047698168 |
| UPP2 | Notch_signaling             | UCS | -0.10897398  |
| UPP2 | One carbon pool by folate   | UCS | -0.025325644 |
| UPP2 | Other glycan degradation    | UCS | 0.053054949  |
| UPP2 | Other types of o-glycan b   | UCS | -0.008611596 |
| UPP2 | Oxidative phosphorylatio    | UCS | 0.186268645  |
| UPP2 | P53_pathway                 | UCS | 0.125737165  |
| UPP2 | P53_signaling_pathway       | UCS | -0.15089117  |
| UPP2 | Pantothenate and coa bios   | UCS | -0.068917023 |
| UPP2 | Pentose and glucuronate i   | UCS | 0.143114592  |
| UPP2 | Pentose phosphate pathwa    | UCS | 0.148791589  |
| UPP2 | Pericyte                    | UCS | -0.263326308 |
| UPP2 | Phenylalanine metabolism    | UCS | 0.017713048  |
| UPP2 | Phenylalanine, tyrosine ar  | UCS | -0.164334142 |
| UPP2 | Phosphonate and phosphir    | UCS | -0.031546657 |
| UPP2 | Pi3k_akt_activation         | UCS | -0.046958293 |
| UPP2 | Pi3k_akt_mtor_signaling     | UCS | -0.029662487 |
| UPP2 | Porphyrin and chlorophyl    | UCS | 0.099901758  |
| UPP2 | Primary bile acid biosynt   | UCS | 0.07468787   |
| UPP2 | Propanoate metabolism       | UCS | 0.061929838  |
| UPP2 | Purine metabolism           | UCS | 0.146715665  |
| UPP2 | Pyrimidine metabolism       | UCS | 0.108102018  |
| UPP2 | Pyruvate metabolism         | UCS | 0.010965287  |
| UPP2 | Regulation_of_autophagy     | UCS | 4.22E-05     |
| UPP2 | Retinol metabolism          | UCS | 0.173652555  |
| UPP2 | Riboflavin metabolism       | UCS | 0.133429151  |
| UPP2 | Schmahl_pdgf_signaling      | UCS | 0.015321494  |
| UPP2 | Selenocompound metabol      | UCS | -0.141229355 |
| UPP2 | Signaling_by_hippo          | UCS | -0.224162259 |
| UPP2 | Sphingolipid metabolism     | UCS | 0.176414236  |
| UPP2 | Starch and sucrose metabo   | UCS | -0.034714828 |
| UPP2 | Steroid biosynthesis        | UCS | 0.322463828  |
| UPP2 | Steroid hormone biosynth    | UCS | 0.126500246  |

|      |                            |     |              |
|------|----------------------------|-----|--------------|
| UPP2 | Sulfur metabolism          | UCS | -0.107088174 |
| UPP2 | Synthesis and degradation  | UCS | 0.117434964  |
| UPP2 | T helper cell              | UCS | -0.107435119 |
| UPP2 | T helper1 (th1) cell       | UCS | 0.001672356  |
| UPP2 | T helper17 (th17) cell     | UCS | -0.074896804 |
| UPP2 | T helper2 (th2) cell       | UCS | 0.021474073  |
| UPP2 | T helper9 (th9) cell       | UCS | 0.028839586  |
| UPP2 | Taurine and hypotaurine r  | UCS | 0.199241653  |
| UPP2 | Terpenoid backbone biosy   | UCS | 0.322991014  |
| UPP2 | Tgf_beta_signaling_pathw   | UCS | -0.305899336 |
| UPP2 | Thiamine metabolism        | UCS | 0.056596932  |
| UPP2 | Tnfa_signaling_via_nfkb    | UCS | -0.044076476 |
| UPP2 | Tryptophan metabolism      | UCS | 0.237534551  |
| UPP2 | Tumor endothelial cell     | UCS | 0.054221816  |
| UPP2 | Tyrosine metabolism        | UCS | 0.156678235  |
| UPP2 | Ubiquinone and other terq  | UCS | 0.116569815  |
| UPP2 | Valine, leucine and isoleu | UCS | 0.00987531   |
| UPP2 | Valine, leucine and isoleu | UCS | 0.127136447  |
| UPP2 | Vascular endothelial cell  | UCS | -0.234737954 |
| UPP2 | Vascular smooth muscle c   | UCS | -0.16493723  |
| UPP2 | Vegf_signaling_pathway     | UCS | 0.102541881  |
| UPP2 | Vitamin b6 metabolism      | UCS | 0.210488762  |
| UPP2 | Willert_wnt_signaling      | UCS | 0.068660083  |
| UPP2 | Wnt_beta_catenin_signali   | UCS | -0.416041623 |
| CDA  | Abnormal plasma cell       | UVM | 0.245011167  |
| CDA  | Activated b cell           | UVM | 0.481381956  |
| CDA  | Activated cd4+ t cell      | UVM | 0.305520789  |
| CDA  | Activated t cell           | UVM | 0.319884616  |
| CDA  | Alanine, aspartate and glu | UVM | -0.130476744 |
| CDA  | Alcala_apoptosis           | UVM | 0.384471223  |
| CDA  | Alpha-linolenic acid meta  | UVM | 0.465293881  |
| CDA  | Amino sugar and nucleoti   | UVM | 0.103047085  |
| CDA  | Ampk_pathway               | UVM | -0.128948204 |
| CDA  | Angiogenesis               | UVM | 0.394275686  |
| CDA  | Arachidonic acid metabol   | UVM | 0.592306387  |
| CDA  | Arginine and proline metæ  | UVM | 0.353115177  |
| CDA  | Arginine biosynthesis      | UVM | 0.176483649  |
| CDA  | Ascorbate and aldarate mε  | UVM | 0.148642293  |
| CDA  | Atypical memory b cell     | UVM | 0.249124698  |
| CDA  | Axl+siglec6+ dendritic ce  | UVM | 0.567771258  |
| CDA  | B cell                     | UVM | 0.300052283  |
| CDA  | B1 cell                    | UVM | 0.492556889  |
| CDA  | Basal cell                 | UVM | 0.602067734  |



|     |                             |     |              |
|-----|-----------------------------|-----|--------------|
| CDA | Beta-alanine metabolism     | UVM | 0.090078726  |
| CDA | Biosynthesis of unsaturate  | UVM | 0.272820012  |
| CDA | Biotin metabolism           | UVM | 0.066200672  |
| CDA | Butanoate metabolism        | UVM | -0.219696809 |
| CDA | Caffeine metabolism         | UVM | 0.227910854  |
| CDA | Cancer stem cell            | UVM | 0.341775234  |
| CDA | Cancer stem-like cell       | UVM | 0.175539798  |
| CDA | Cd4+ cytotoxic t cell       | UVM | 0.420858886  |
| CDA | Cd4+ memory t cell          | UVM | 0.392957071  |
| CDA | Cd4+ regulatory t cell      | UVM | 0.502398489  |
| CDA | Cd4+ t helper cell          | UVM | 0.408663106  |
| CDA | Cd4+cd25+ regulatory t c    | UVM | 0.386310513  |
| CDA | Cd8+ cytotoxic t cell       | UVM | 0.350024221  |
| CDA | Cd8+ regulatory t cell      | UVM | 0.236256825  |
| CDA | Cell_cycle                  | UVM | -0.303115638 |
| CDA | Chandran_metastasis_top5    | UVM | -0.519218637 |
| CDA | Citrate cycle (tca cycle)   | UVM | -0.2326611   |
| CDA | Cysteine and methionine r   | UVM | -0.121621758 |
| CDA | Cytokine induced killer c   | UVM | 0.364021994  |
| CDA | D-arginine and d-ornithin   | UVM | 0.18536465   |
| CDA | D-glutamine and d-glutan    | UVM | -0.425385669 |
| CDA | Dendritic cell              | UVM | 0.504132051  |
| CDA | Dna_repair                  | UVM | 0.02159369   |
| CDA | Dna_replication             | UVM | -0.203371585 |
| CDA | Double-negative memory      | UVM | 0.364477915  |
| CDA | Drug metabolism - cytoch    | UVM | 0.380303821  |
| CDA | Drug metabolism - other     | UVM | 0.434596119  |
| CDA | E2f_targets                 | UVM | -0.330411005 |
| CDA | Ecm_receptor_interaction    | UVM | 0.373750972  |
| CDA | Effector cd4+ memory t (    | UVM | 0.279081906  |
| CDA | Effector cd8+ memory t (    | UVM | 0.394796754  |
| CDA | Effector memory t cell      | UVM | 0.401485217  |
| CDA | Effector regulatory t (treg | UVM | 0.358961772  |
| CDA | Elvidge_hif1a_targets_up    | UVM | -0.121617535 |
| CDA | Endothelial cell            | UVM | 0.203927881  |
| CDA | Eosinophil                  | UVM | 0.463246801  |
| CDA | Ether lipid metabolism      | UVM | 0.3740706    |
| CDA | Exhausted cd4+ t cell       | UVM | 0.192296286  |
| CDA | Exhausted cd8+ t cell       | UVM | 0.293124932  |
| CDA | Exhausted t cell            | UVM | 0.380233882  |
| CDA | Fat cell (adipocyte)        | UVM | 0.146133587  |
| CDA | Fatty acid biosynthesis     | UVM | 0.039234134  |
| CDA | Fatty acid degradation      | UVM | -0.093834441 |

|     |                              |     |              |
|-----|------------------------------|-----|--------------|
| CDA | Fatty acid elongation        | UVM | 0.17694281   |
| CDA | Fibroblast                   | UVM | 0.359821753  |
| CDA | Folate biosynthesis          | UVM | 0.214659413  |
| CDA | Follicular b cell            | UVM | 0.382838593  |
| CDA | Follicular dendritic cell    | UVM | 0.238565375  |
| CDA | Follicular helper (tfh) t ce | UVM | 0.314582428  |
| CDA | Follicular t cell            | UVM | 0.352808547  |
| CDA | Foxp3+il-17+ t cell          | UVM | 0.406566416  |
| CDA | Fructose and mannose me      | UVM | 0.421022357  |
| CDA | G2m_checkpoint               | UVM | -0.408210142 |
| CDA | Galactose metabolism         | UVM | 0.413829473  |
| CDA | Galie_tumor_stemness_ge      | UVM | 0.256351578  |
| CDA | Glutathione metabolism       | UVM | 0.459818284  |
| CDA | Glycerolipid metabolism      | UVM | 0.345235154  |
| CDA | Glycerophospholipid metæ     | UVM | 0.458659721  |
| CDA | Glycine, serine and threor   | UVM | 0.495699776  |
| CDA | Glycolysis / gluconeogene    | UVM | 0.194569778  |
| CDA | Glycosaminoglycan biosy1     | UVM | 0.415594549  |
| CDA | Glycosaminoglycan biosy1     | UVM | 0.307167809  |
| CDA | Glycosaminoglycan biosy1     | UVM | 0.36008648   |
| CDA | Glycosaminoglycan degra      | UVM | 0.462130246  |
| CDA | Glycosphingolipid biosyn1    | UVM | 0.458130551  |
| CDA | Glycosphingolipid biosyn1    | UVM | 0.505862983  |
| CDA | Glycosphingolipid biosyn1    | UVM | 0.32966264   |
| CDA | Glycosylphosphatidylinos:    | UVM | -0.215523602 |
| CDA | Glyoxylate and dicarboxy     | UVM | -0.073402904 |
| CDA | Granulocyte                  | UVM | 0.388469787  |
| CDA | Hedgehog_signaling           | UVM | 0.24945764   |
| CDA | Histidine metabolism         | UVM | 0.197350084  |
| CDA | Hypoxia                      | UVM | 0.301099695  |
| CDA | Il-17ralpha t cell           | UVM | 0.357649592  |
| CDA | Il2_stat5_signaling          | UVM | 0.501323183  |
| CDA | Il6_jak_stat3_signaling      | UVM | 0.432938158  |
| CDA | Immune_checkpoints_tunr      | UVM | 0.461026673  |
| CDA | Immune_inhibition_cytok      | UVM | 0.588339319  |
| CDA | Inositol phosphatè metabo    | UVM | -0.272500576 |
| CDA | Interleukin_6_signaling      | UVM | -0.033640077 |
| CDA | Jaeger_metastasis_up         | UVM | -0.01852293  |
| CDA | Jain_nfkb_signaling          | UVM | -0.151471147 |
| CDA | Kras_signaling_up            | UVM | 0.50409502   |
| CDA | Linoleic acid metabolism     | UVM | 0.374909928  |
| CDA | Lipoic acid metabolism       | UVM | -0.377658038 |
| CDA | Lysine degradation           | UVM | -0.327843616 |

|     |                             |     |              |
|-----|-----------------------------|-----|--------------|
| CDA | Lysosome                    | UVM | 0.40472243   |
| CDA | M1 macrophage               | UVM | 0.306649626  |
| CDA | M2 macrophage               | UVM | 0.478698967  |
| CDA | Mannose type o-glycan bi    | UVM | -0.051723725 |
| CDA | Mapk_signaling_pathway      | UVM | 0.287841755  |
| CDA | Mapk3_erk1_activation       | UVM | 0.005648298  |
| CDA | Marginal zone b cell        | UVM | 0.210839888  |
| CDA | Memory b cell               | UVM | 0.322311819  |
| CDA | Mesenchymal cell            | UVM | 0.440600148  |
| CDA | Mesenchymal stem cell       | UVM | 0.377297113  |
| CDA | Metabolism of xenobiotic    | UVM | 0.488715942  |
| CDA | Migrating cancer stem cel   | UVM | 0.369016572  |
| CDA | Mitotic_spindle             | UVM | -0.485064375 |
| CDA | Monocyte                    | UVM | 0.471614816  |
| CDA | Mtor_signaling_pathway      | UVM | -0.068167199 |
| CDA | Mtorc1_signaling            | UVM | -0.025189041 |
| CDA | Mucin type o-glycan biosy   | UVM | -0.299621044 |
| CDA | Myc_targets_v1              | UVM | -0.315644383 |
| CDA | Myeloid cell                | UVM | 0.397001062  |
| CDA | N-glycan biosynthesis       | UVM | 0.223013594  |
| CDA | Naive b cell                | UVM | 0.335406247  |
| CDA | Naive cd4+ t cell           | UVM | 0.372447961  |
| CDA | Naive cd8+ t cell           | UVM | 0.027413874  |
| CDA | Natural killer cell         | UVM | 0.407867456  |
| CDA | Natural killer t (nkt) cell | UVM | -0.188358954 |
| CDA | Natural regulatory t (treg) | UVM | 0.431866449  |
| CDA | Neomycin, kanamycin and     | UVM | 0.371065646  |
| CDA | Neutrophil                  | UVM | 0.505893319  |
| CDA | Nicotinate and nicotinami   | UVM | 0.17593043   |
| CDA | Nitrogen metabolism         | UVM | -0.094247665 |
| CDA | Nod_like_receptor_signal    | UVM | 0.372184562  |
| CDA | Notch_signaling             | UVM | 0.27447637   |
| CDA | One carbon pool by folate   | UVM | -0.39166123  |
| CDA | Other glycan degradation    | UVM | 0.250715363  |
| CDA | Other types of o-glycan b   | UVM | 0.413455634  |
| CDA | Oxidative phosphorylatior   | UVM | 0.332051815  |
| CDA | P53_pathway                 | UVM | 0.492680426  |
| CDA | P53_signaling_pathway       | UVM | 0.009763058  |
| CDA | Pantothenate and coa bios   | UVM | 0.1558456    |
| CDA | Pentose and glucuronate in  | UVM | 0.304426082  |
| CDA | Pentose phosphate pathwa    | UVM | 0.263844828  |
| CDA | Pericyte                    | UVM | 0.358252455  |
| CDA | Phenylalanine metabolism    | UVM | 0.343425132  |

|     |                            |     |              |
|-----|----------------------------|-----|--------------|
| CDA | Phenylalanine, tyrosine ar | UVM | 0.285595976  |
| CDA | Phosphonate and phosphir   | UVM | -0.015429794 |
| CDA | Pi3k_akt_activation        | UVM | -0.066037709 |
| CDA | Pi3k_akt_mtor_signaling    | UVM | 0.281519749  |
| CDA | Porphyrin and chlorophyl   | UVM | 0.328262412  |
| CDA | Primary bile acid biosynt  | UVM | 0.134594     |
| CDA | Propanoate metabolism      | UVM | -0.493730206 |
| CDA | Purine metabolism          | UVM | -0.077006497 |
| CDA | Pyrimidine metabolism      | UVM | -0.080655978 |
| CDA | Pyruvate metabolism        | UVM | -0.133476591 |
| CDA | Regulation_of_autophagy    | UVM | -0.283857224 |
| CDA | Retinol metabolism         | UVM | 0.427480077  |
| CDA | Riboflavin metabolism      | UVM | 0.233340799  |
| CDA | Schmahl_pdgf_signaling     | UVM | -0.287703262 |
| CDA | Selenocompound metabol     | UVM | -0.312797575 |
| CDA | Signaling_by_hippo         | UVM | -0.494520174 |
| CDA | Sphingolipid metabolism    | UVM | 0.029849114  |
| CDA | Starch and sucrose metabo  | UVM | 0.125091631  |
| CDA | Steroid biosynthesis       | UVM | 0.255512213  |
| CDA | Steroid hormone biosynth   | UVM | 0.363642474  |
| CDA | Sulfur metabolism          | UVM | 0.056318688  |
| CDA | Synthesis and degradation  | UVM | -0.096881459 |
| CDA | T helper cell              | UVM | 0.429348988  |
| CDA | T helper1 (th1) cell       | UVM | 0.333466825  |
| CDA | T helper17 (th17) cell     | UVM | 0.32913855   |
| CDA | T helper2 (th2) cell       | UVM | 0.374743566  |
| CDA | T helper9 (th9) cell       | UVM | 0.433129804  |
| CDA | Taurine and hypotaurine r  | UVM | 0.201608902  |
| CDA | Terpenoid backbone biosy   | UVM | -0.029281413 |
| CDA | Tgf_beta_signaling_pathw   | UVM | -0.018205837 |
| CDA | Thiamine metabolism        | UVM | 0.233781051  |
| CDA | Tnfa_signaling_via_nfkb    | UVM | 0.402557839  |
| CDA | Tryptophan metabolism      | UVM | 0.310820512  |
| CDA | Tumor endothelial cell     | UVM | 0.171827361  |
| CDA | Tyrosine metabolism        | UVM | 0.348481035  |
| CDA | Ubiquinone and other ter   | UVM | 0.036568398  |
| CDA | Valine, leucine and isoleu | UVM | 0.564499354  |
| CDA | Valine, leucine and isoleu | UVM | -0.26850181  |
| CDA | Vascular endothelial cell  | UVM | 0.551957926  |
| CDA | Vascular smooth muscle c   | UVM | 0.365278181  |
| CDA | Vegf_signaling_pathway     | UVM | 0.47099077   |
| CDA | Vitamin b6 metabolism      | UVM | 0.406435434  |
| CDA | Willert_wnt_signaling      | UVM | -0.094879077 |

|      |                            |     |              |
|------|----------------------------|-----|--------------|
| CDA  | Wnt_beta_catenin_signali   | UVM | 0.122161327  |
| UCK1 | Abnormal plasma cell       | UVM | 0.019305828  |
| UCK1 | Activated b cell           | UVM | -0.157081998 |
| UCK1 | Activated cd4+ t cell      | UVM | -0.376665795 |
| UCK1 | Activated t cell           | UVM | -0.319498152 |
| UCK1 | Alanine, aspartate and glu | UVM | 0.029121362  |
| UCK1 | Alcala_apoptosis           | UVM | -0.130002168 |
| UCK1 | Alpha-linolenic acid meta  | UVM | 0.36093476   |
| UCK1 | Amino sugar and nucleoti   | UVM | -0.19454288  |
| UCK1 | Ampk_pathway               | UVM | 0.108169373  |
| UCK1 | Angiogenesis               | UVM | 0.036133595  |
| UCK1 | Arachidonic acid metabol:  | UVM | 0.50507306   |
| UCK1 | Arginine and proline meta  | UVM | 0.44051726   |
| UCK1 | Arginine biosynthesis      | UVM | 0.393827787  |
| UCK1 | Ascorbate and aldarate me  | UVM | 0.380124229  |
| UCK1 | Atypical memory b cell     | UVM | -0.212010271 |
| UCK1 | Axl+siglec6+ dendritic ce  | UVM | 0.110219127  |
| UCK1 | B cell                     | UVM | -0.371616998 |
| UCK1 | B1 cell                    | UVM | -0.146900288 |
| UCK1 | Basal cell                 | UVM | 0.306524585  |
| UCK1 | Beta-alanine metabolism    | UVM | 0.403025897  |
| UCK1 | Biosynthesis of unsaturate | UVM | 0.153530083  |
| UCK1 | Biotin metabolism          | UVM | -0.376294248 |
| UCK1 | Butanoate metabolism       | UVM | 0.087779461  |
| UCK1 | Caffeine metabolism        | UVM | 0.494991092  |
| UCK1 | Cancer stem cell           | UVM | -0.29880984  |
| UCK1 | Cancer stem-like cell      | UVM | -0.078401571 |
| UCK1 | Cd4+ cytotoxic t cell      | UVM | -0.273730702 |
| UCK1 | Cd4+ memory t cell         | UVM | -0.227787884 |
| UCK1 | Cd4+ regulatory t cell     | UVM | -0.099551199 |
| UCK1 | Cd4+ t helper cell         | UVM | -0.280477853 |
| UCK1 | Cd4+cd25+ regulatory t c   | UVM | -0.291913529 |
| UCK1 | Cd8+ cytotoxic t cell      | UVM | -0.332615672 |
| UCK1 | Cd8+ regulatory t cell     | UVM | -0.362814107 |
| UCK1 | Cell_cycle                 | UVM | -0.353344517 |
| UCK1 | Chandran_metastasis_top    | UVM | -0.49735932  |
| UCK1 | Citrate cycle (tca cycle)  | UVM | -0.247205553 |
| UCK1 | Cysteine and methionine r  | UVM | -0.21250735  |
| UCK1 | Cytokine induced killer ce | UVM | -0.19176591  |
| UCK1 | D-arginine and d-ornithin  | UVM | -0.024966768 |
| UCK1 | D-glutamine and d-glutan   | UVM | -0.299645823 |
| UCK1 | Dendritic cell             | UVM | -0.162275381 |
| UCK1 | Dna_repair                 | UVM | 0.143215119  |

|      |                              |     |              |
|------|------------------------------|-----|--------------|
| UCK1 | Dna_replication              | UVM | -0.006626185 |
| UCK1 | Double-negative memory       | UVM | -0.157349621 |
| UCK1 | Drug metabolism - cytoch     | UVM | 0.596735857  |
| UCK1 | Drug metabolism - other      | UVM | 0.512107521  |
| UCK1 | E2f_targets                  | UVM | -0.202762936 |
| UCK1 | Ecm_receptor_interaction     | UVM | 0.260571799  |
| UCK1 | Effector cd4+ memory t       | UVM | -0.397249361 |
| UCK1 | Effector cd8+ memory t       | UVM | -0.293832531 |
| UCK1 | Effector memory t cell       | UVM | -0.306173726 |
| UCK1 | Effector regulatory t (treg  | UVM | -0.307602819 |
| UCK1 | Elvidge_hif1a_targets_up     | UVM | -0.496778116 |
| UCK1 | Endothelial cell             | UVM | -0.330653701 |
| UCK1 | Eosinophil                   | UVM | -0.265150849 |
| UCK1 | Ether lipid metabolism       | UVM | 0.056782231  |
| UCK1 | Exhausted cd4+ t cell        | UVM | -0.409518526 |
| UCK1 | Exhausted cd8+ t cell        | UVM | -0.357398692 |
| UCK1 | Exhausted t cell             | UVM | -0.309227757 |
| UCK1 | Fat cell (adipocyte)         | UVM | 0.460394832  |
| UCK1 | Fatty acid biosynthesis      | UVM | -0.161143357 |
| UCK1 | Fatty acid degradation       | UVM | 0.067466621  |
| UCK1 | Fatty acid elongation        | UVM | 0.042084989  |
| UCK1 | Fibroblast                   | UVM | -0.200616766 |
| UCK1 | Folate biosynthesis          | UVM | 0.388741979  |
| UCK1 | Follicular b cell            | UVM | -0.276612684 |
| UCK1 | Follicular dendritic cell    | UVM | -0.03378801  |
| UCK1 | Follicular helper (tfh) t ce | UVM | -0.341591717 |
| UCK1 | Follicular t cell            | UVM | -0.268787871 |
| UCK1 | Foxp3+il-17+ t cell          | UVM | 0.011366297  |
| UCK1 | Fructose and mannose me      | UVM | 0.292175154  |
| UCK1 | G2m_checkpoint               | UVM | -0.353848444 |
| UCK1 | Galactose metabolism         | UVM | 0.276452663  |
| UCK1 | Galie_tumor_stemness_ge      | UVM | 0.257782631  |
| UCK1 | Glutathione metabolism       | UVM | 0.201568058  |
| UCK1 | Glycerolipid metabolism      | UVM | 0.344103144  |
| UCK1 | Glycerophospholipid metæ     | UVM | 0.223464788  |
| UCK1 | Glycine, serine and threor   | UVM | 0.411431043  |
| UCK1 | Glycolysis / gluconeogene    | UVM | 0.254000676  |
| UCK1 | Glycosaminoglycan biosy      | UVM | 0.279663404  |
| UCK1 | Glycosaminoglycan biosy      | UVM | 0.020589383  |
| UCK1 | Glycosaminoglycan biosy      | UVM | 0.352641968  |
| UCK1 | Glycosaminoglycan degra      | UVM | 0.298630734  |
| UCK1 | Glycosphingolipid biosyn     | UVM | 0.30272481   |
| UCK1 | Glycosphingolipid biosyn     | UVM | 0.402068426  |

|      |                           |     |              |
|------|---------------------------|-----|--------------|
| UCK1 | Glycosphingolipid biosyn  | UVM | 0.457890499  |
| UCK1 | Glycosylphosphatidylinos  | UVM | -0.411193405 |
| UCK1 | Glyoxylate and dicarboxy  | UVM | -0.0724866   |
| UCK1 | Granulocyte               | UVM | -0.318481308 |
| UCK1 | Hedgehog_signaling        | UVM | 0.034885646  |
| UCK1 | Histidine metabolism      | UVM | 0.488787981  |
| UCK1 | Hypoxia                   | UVM | 0.297647995  |
| UCK1 | Il-17alpha t cell         | UVM | -0.288293017 |
| UCK1 | Il2_stat5_signaling       | UVM | 0.003339723  |
| UCK1 | Il6_jak_stat3_signaling   | UVM | -0.184403437 |
| UCK1 | Immune_checkpoints_tur    | UVM | -0.085819968 |
| UCK1 | Immune_inhibition_cytok   | UVM | 0.158543281  |
| UCK1 | Inositol phosphate metabo | UVM | -0.469192434 |
| UCK1 | Interleukin_6_signaling   | UVM | -0.397647519 |
| UCK1 | Jaeger_metastasis_up      | UVM | -0.204584131 |
| UCK1 | Jain_nfkb_signaling       | UVM | -0.479204582 |
| UCK1 | Kras_signaling_up         | UVM | -0.055901292 |
| UCK1 | Linoleic acid metabolism  | UVM | 0.417025859  |
| UCK1 | Lipoic acid metabolism    | UVM | -0.222563985 |
| UCK1 | Lysine degradation        | UVM | 0.287948567  |
| UCK1 | Lysosome                  | UVM | 0.02410145   |
| UCK1 | M1 macrophage             | UVM | -0.313664638 |
| UCK1 | M2 macrophage             | UVM | -0.164197218 |
| UCK1 | Mannose type o-glycan bi  | UVM | -0.111405791 |
| UCK1 | Mapk_signaling_pathway    | UVM | 0.007702333  |
| UCK1 | Mapk3_erk1_activation     | UVM | -0.176063488 |
| UCK1 | Marginal zone b cell      | UVM | -0.423921726 |
| UCK1 | Memory b cell             | UVM | -0.280317737 |
| UCK1 | Mesenchymal cell          | UVM | 0.042420254  |
| UCK1 | Mesenchymal stem cell     | UVM | -0.287742847 |
| UCK1 | Metabolism of xenobiotic  | UVM | 0.565247156  |
| UCK1 | Migrating cancer stem cel | UVM | 0.079609011  |
| UCK1 | Mitotic_spindle           | UVM | -0.331648248 |
| UCK1 | Monocyte                  | UVM | -0.251446413 |
| UCK1 | Mtor_signaling_pathway    | UVM | -0.198597101 |
| UCK1 | Mtorc1_signaling          | UVM | -0.360847588 |
| UCK1 | Mucin type o-glycan bios  | UVM | -0.132319873 |
| UCK1 | Myc_targets_v1            | UVM | -0.230008916 |
| UCK1 | Myeloid cell              | UVM | -0.319384935 |
| UCK1 | N-glycan biosynthesis     | UVM | -0.005928746 |
| UCK1 | Naive b cell              | UVM | -0.217441332 |
| UCK1 | Naive cd4+ t cell         | UVM | -0.034976203 |
| UCK1 | Naive cd8+ t cell         | UVM | -0.178506558 |

|      |                             |     |              |
|------|-----------------------------|-----|--------------|
| UCK1 | Natural killer cell         | UVM | -0.302593518 |
| UCK1 | Natural killer t (nkt) cell | UVM | -0.559141583 |
| UCK1 | Natural regulatory t (treg) | UVM | -0.233681425 |
| UCK1 | Neomycin, kanamycin and     | UVM | -0.049697333 |
| UCK1 | Neutrophil                  | UVM | -0.203281173 |
| UCK1 | Nicotinate and nicotinami   | UVM | -0.22147482  |
| UCK1 | Nitrogen metabolism         | UVM | -0.025982459 |
| UCK1 | Nod_like_receptor_signal    | UVM | -0.212564212 |
| UCK1 | Notch_signaling             | UVM | 0.211543242  |
| UCK1 | One carbon pool by folate   | UVM | -0.484611765 |
| UCK1 | Other glycan degradation    | UVM | 0.200662007  |
| UCK1 | Other types of o-glycan b   | UVM | 0.464183376  |
| UCK1 | Oxidative phosphorylatio    | UVM | 0.23680435   |
| UCK1 | P53_pathway                 | UVM | 0.326364025  |
| UCK1 | P53_signaling_pathway       | UVM | -0.188047566 |
| UCK1 | Pantothenate and coa bios   | UVM | -0.217440807 |
| UCK1 | Pentose and glucuronate i   | UVM | 0.376850243  |
| UCK1 | Pentose phosphate pathwa    | UVM | 0.403264448  |
| UCK1 | Pericyte                    | UVM | -0.152427061 |
| UCK1 | Phenylalanine metabolism    | UVM | 0.611278552  |
| UCK1 | Phenylalanine, tyrosine ar  | UVM | 0.551671206  |
| UCK1 | Phosphonate and phosphir    | UVM | -0.1986655   |
| UCK1 | Pi3k_akt_activation         | UVM | -0.081813671 |
| UCK1 | Pi3k_akt_mtor_signaling     | UVM | -0.099472773 |
| UCK1 | Porphyrin and chlorophyl    | UVM | 0.544624089  |
| UCK1 | Primary bile acid biosynt   | UVM | 0.371348454  |
| UCK1 | Propanoate metabolism       | UVM | -0.377853448 |
| UCK1 | Purine metabolism           | UVM | 0.076879198  |
| UCK1 | Pyrimidine metabolism       | UVM | -0.046001584 |
| UCK1 | Pyruvate metabolism         | UVM | 0.105648583  |
| UCK1 | Regulation_of_autophagy     | UVM | -0.158817573 |
| UCK1 | Retinol metabolism          | UVM | 0.57979047   |
| UCK1 | Riboflavin metabolism       | UVM | 0.354932172  |
| UCK1 | Schmahl_pdgf_signaling      | UVM | 0.07058662   |
| UCK1 | Selenocompound metabol      | UVM | -0.482896115 |
| UCK1 | Signaling_by_hippo          | UVM | -0.408288678 |
| UCK1 | Sphingolipid metabolism     | UVM | 0.028762734  |
| UCK1 | Starch and sucrose metabo   | UVM | -0.037611149 |
| UCK1 | Steroid biosynthesis        | UVM | 0.24184658   |
| UCK1 | Steroid hormone biosynth    | UVM | 0.548016283  |
| UCK1 | Sulfur metabolism           | UVM | -0.029232532 |
| UCK1 | Synthesis and degradation   | UVM | -0.013429817 |
| UCK1 | T helper cell               | UVM | -0.288701204 |



|      |                            |     |              |
|------|----------------------------|-----|--------------|
| UCK1 | T helper1 (th1) cell       | UVM | -0.337591921 |
| UCK1 | T helper17 (th17) cell     | UVM | -0.307958473 |
| UCK1 | T helper2 (th2) cell       | UVM | -0.23277252  |
| UCK1 | T helper9 (th9) cell       | UVM | -0.257272907 |
| UCK1 | Taurine and hypotaurine r  | UVM | 0.004205393  |
| UCK1 | Terpenoid backbone biosy   | UVM | -0.063717024 |
| UCK1 | Tgf_beta_signaling_pathw   | UVM | 0.150511671  |
| UCK1 | Thiamine metabolism        | UVM | 0.229688498  |
| UCK1 | Tnfa_signaling_via_nfkb    | UVM | 0.011935785  |
| UCK1 | Tryptophan metabolism      | UVM | 0.533179431  |
| UCK1 | Tumor endothelial cell     | UVM | -0.075687144 |
| UCK1 | Tyrosine metabolism        | UVM | 0.702406226  |
| UCK1 | Ubiquinone and other terf  | UVM | 0.104957941  |
| UCK1 | Valine, leucine and isoleu | UVM | 0.036523132  |
| UCK1 | Valine, leucine and isoleu | UVM | -0.099232716 |
| UCK1 | Vascular endothelial cell  | UVM | 0.304099976  |
| UCK1 | Vascular smooth muscle c   | UVM | 0.089831235  |
| UCK1 | Vegf_signaling_pathway     | UVM | 0.112334597  |
| UCK1 | Vitamin b6 metabolism      | UVM | 0.433979045  |
| UCK1 | Willert_wnt_signaling      | UVM | -0.247607725 |
| UCK1 | Wnt_beta_catenin_signali   | UVM | 0.264233067  |
| UCK2 | Abnormal plasma cell       | UVM | 0.10805427   |
| UCK2 | Activated b cell           | UVM | 0.004794567  |
| UCK2 | Activated cd4+ t cell      | UVM | 0.009890033  |
| UCK2 | Activated t cell           | UVM | 0.099652415  |
| UCK2 | Alanine, aspartate and glu | UVM | -0.093178045 |
| UCK2 | Alcala_apoptosis           | UVM | 0.162154483  |
| UCK2 | Alpha-linolenic acid meta  | UVM | -0.274786487 |
| UCK2 | Amino sugar and nucleoti   | UVM | 0.316300166  |
| UCK2 | Ampk_pathway               | UVM | 0.044591585  |
| UCK2 | Angiogenesis               | UVM | 0.295356632  |
| UCK2 | Arachidonic acid metabol   | UVM | -0.283014754 |
| UCK2 | Arginine and proline metæ  | UVM | -0.091954826 |
| UCK2 | Arginine biosynthesis      | UVM | -0.056556435 |
| UCK2 | Ascorbate and aldarate mε  | UVM | -0.136163569 |
| UCK2 | Atypical memory b cell     | UVM | 0.055225837  |
| UCK2 | Axl+siglec6+ dendritic ce  | UVM | -0.040391921 |
| UCK2 | B cell                     | UVM | 0.064323328  |
| UCK2 | B1 cell                    | UVM | -0.01170026  |
| UCK2 | Basal cell                 | UVM | 0.059788742  |
| UCK2 | Beta-alanine metabolism    | UVM | -0.326856523 |
| UCK2 | Biosynthesis of unsaturate | UVM | 0.221044336  |
| UCK2 | Biotin metabolism          | UVM | 0.090201546  |

|      |                             |     |              |
|------|-----------------------------|-----|--------------|
| UCK2 | Butanoate metabolism        | UVM | -0.107795036 |
| UCK2 | Caffeine metabolism         | UVM | -0.195236443 |
| UCK2 | Cancer stem cell            | UVM | 0.245550796  |
| UCK2 | Cancer stem-like cell       | UVM | 0.324821402  |
| UCK2 | Cd4+ cytotoxic t cell       | UVM | 0.089501666  |
| UCK2 | Cd4+ memory t cell          | UVM | 0.02013933   |
| UCK2 | Cd4+ regulatory t cell      | UVM | -0.069867428 |
| UCK2 | Cd4+ t helper cell          | UVM | 0.034177821  |
| UCK2 | Cd4+cd25+ regulatory t c    | UVM | 0.020334018  |
| UCK2 | Cd8+ cytotoxic t cell       | UVM | 0.084125909  |
| UCK2 | Cd8+ regulatory t cell      | UVM | 0.012609997  |
| UCK2 | Cell_cycle                  | UVM | 0.5343841    |
| UCK2 | Chandran_metastasis_top5    | UVM | 0.260759292  |
| UCK2 | Citrate cycle (tca cycle)   | UVM | 0.245005461  |
| UCK2 | Cysteine and methionine r   | UVM | 0.199153275  |
| UCK2 | Cytokine induced killer c   | UVM | 0.102617471  |
| UCK2 | D-arginine and d-ornithin   | UVM | 0.124486329  |
| UCK2 | D-glutamine and d-glutan    | UVM | 0.042900789  |
| UCK2 | Dendritic cell              | UVM | 0.009664822  |
| UCK2 | Dna_repair                  | UVM | 0.054505259  |
| UCK2 | Dna_replication             | UVM | 0.38420671   |
| UCK2 | Double-negative memory      | UVM | -0.042316219 |
| UCK2 | Drug metabolism - cytoch    | UVM | -0.323925001 |
| UCK2 | Drug metabolism - other     | UVM | -0.041182674 |
| UCK2 | E2f_targets                 | UVM | 0.53692098   |
| UCK2 | Ecm_receptor_interaction    | UVM | -0.086773162 |
| UCK2 | Effector cd4+ memory t (    | UVM | 0.069110819  |
| UCK2 | Effector cd8+ memory t (    | UVM | 0.133519627  |
| UCK2 | Effector memory t cell      | UVM | 0.034327899  |
| UCK2 | Effector regulatory t (treg | UVM | 0.015867531  |
| UCK2 | Elvidge_hif1a_targets_up    | UVM | 0.423444535  |
| UCK2 | Endothelial cell            | UVM | 0.263734514  |
| UCK2 | Eosinophil                  | UVM | 0.078954258  |
| UCK2 | Ether lipid metabolism      | UVM | -0.123342003 |
| UCK2 | Exhausted cd4+ t cell       | UVM | 0.047969092  |
| UCK2 | Exhausted cd8+ t cell       | UVM | 0.10639711   |
| UCK2 | Exhausted t cell            | UVM | 0.050449224  |
| UCK2 | Fat cell (adipocyte)        | UVM | -0.231033516 |
| UCK2 | Fatty acid biosynthesis     | UVM | 0.320561422  |
| UCK2 | Fatty acid degradation      | UVM | -0.242322118 |
| UCK2 | Fatty acid elongation       | UVM | -0.012296045 |
| UCK2 | Fibroblast                  | UVM | 0.148703347  |
| UCK2 | Folate biosynthesis         | UVM | 0.089891225  |

|      |                              |     |              |
|------|------------------------------|-----|--------------|
| UCK2 | Follicular b cell            | UVM | -0.01086129  |
| UCK2 | Follicular dendritic cell    | UVM | -0.126883014 |
| UCK2 | Follicular helper (tfh) t ce | UVM | 0.027731209  |
| UCK2 | Follicular t cell            | UVM | 0.113112188  |
| UCK2 | Foxp3+il-17+ t cell          | UVM | 0.037324391  |
| UCK2 | Fructose and mannose me      | UVM | 0.022096267  |
| UCK2 | G2m_checkpoint               | UVM | 0.514857055  |
| UCK2 | Galactose metabolism         | UVM | 0.056204484  |
| UCK2 | Galie_tumor_stemness_ge      | UVM | -0.271432805 |
| UCK2 | Glutathione metabolism       | UVM | 0.088983584  |
| UCK2 | Glycerolipid metabolism      | UVM | 0.259165131  |
| UCK2 | Glycerophospholipid metæ     | UVM | 0.061704877  |
| UCK2 | Glycine, serine and threor   | UVM | -0.009817892 |
| UCK2 | Glycolysis / gluconeogene    | UVM | 0.093177968  |
| UCK2 | Glycosaminoglycan biosy      | UVM | -0.18955634  |
| UCK2 | Glycosaminoglycan biosy      | UVM | -0.086057195 |
| UCK2 | Glycosaminoglycan biosy      | UVM | -0.239104797 |
| UCK2 | Glycosaminoglycan degra      | UVM | -0.20591146  |
| UCK2 | Glycosphingolipid biosyn     | UVM | -0.007715945 |
| UCK2 | Glycosphingolipid biosyn     | UVM | 0.031659843  |
| UCK2 | Glycosphingolipid biosyn     | UVM | -0.375707329 |
| UCK2 | Glycosylphosphatidylinos     | UVM | 0.219805926  |
| UCK2 | Glyoxylate and dicarboxy     | UVM | 0.142529064  |
| UCK2 | Granulocyte                  | UVM | 0.129317296  |
| UCK2 | Hedgehog_signaling           | UVM | -0.004006732 |
| UCK2 | Histidine metabolism         | UVM | -0.405795626 |
| UCK2 | Hypoxia                      | UVM | 0.166589441  |
| UCK2 | Il-17alpha t cell            | UVM | 0.067381826  |
| UCK2 | Il2_stat5_signaling          | UVM | 0.062977224  |
| UCK2 | Il6_jak_stat3_signaling      | UVM | 0.071179879  |
| UCK2 | Immune_checkpoints_tun       | UVM | -0.00191932  |
| UCK2 | Immune_inhibition_cytok      | UVM | -0.070666855 |
| UCK2 | Inositol phosphate metabo    | UVM | 0.127684143  |
| UCK2 | Interleukin_6_signaling      | UVM | 0.090737518  |
| UCK2 | Jaeger_metastasis_up         | UVM | 0.599399598  |
| UCK2 | Jain_nfkb_signaling          | UVM | 0.392121226  |
| UCK2 | Kras_signaling_up            | UVM | -0.044713044 |
| UCK2 | Linoleic acid metabolism     | UVM | -0.302880903 |
| UCK2 | Lipoic acid metabolism       | UVM | 0.072362233  |
| UCK2 | Lysine degradation           | UVM | -0.327785479 |
| UCK2 | Lysosome                     | UVM | -0.082937493 |
| UCK2 | M1 macrophage                | UVM | 0.090211033  |
| UCK2 | M2 macrophage                | UVM | -0.009716849 |

|      |                             |     |              |
|------|-----------------------------|-----|--------------|
| UCK2 | Mannose type o-glycan bi    | UVM | -0.182622398 |
| UCK2 | Mapk_signaling_pathway      | UVM | 0.131994817  |
| UCK2 | Mapk3_erk1_activation       | UVM | 0.130838342  |
| UCK2 | Marginal zone b cell        | UVM | -0.007752895 |
| UCK2 | Memory b cell               | UVM | 0.021494327  |
| UCK2 | Mesenchymal cell            | UVM | 0.303069894  |
| UCK2 | Mesenchymal stem cell       | UVM | 0.221251034  |
| UCK2 | Metabolism of xenobiotic    | UVM | -0.238555321 |
| UCK2 | Migrating cancer stem cel   | UVM | -0.247600862 |
| UCK2 | Mitotic_spindle             | UVM | 0.259429353  |
| UCK2 | Monocyte                    | UVM | 0.123654396  |
| UCK2 | Mtor_signaling_pathway      | UVM | -0.083544715 |
| UCK2 | Mtorc1_signaling            | UVM | 0.571206479  |
| UCK2 | Mucin type o-glycan bios    | UVM | 0.128059835  |
| UCK2 | Myc_targets_v1              | UVM | 0.433486552  |
| UCK2 | Myeloid cell                | UVM | 0.036787235  |
| UCK2 | N-glycan biosynthesis       | UVM | 0.324684372  |
| UCK2 | Naive b cell                | UVM | -0.031347546 |
| UCK2 | Naive cd4+ t cell           | UVM | -0.351482706 |
| UCK2 | Naive cd8+ t cell           | UVM | -0.029270439 |
| UCK2 | Natural killer cell         | UVM | 0.067974385  |
| UCK2 | Natural killer t (nkt) cell | UVM | 0.207217444  |
| UCK2 | Natural regulatory t (treg) | UVM | -0.011658229 |
| UCK2 | Neomycin, kanamycin and     | UVM | 0.106180474  |
| UCK2 | Neutrophil                  | UVM | 0.182159478  |
| UCK2 | Nicotinate and nicotinami   | UVM | -0.132515934 |
| UCK2 | Nitrogen metabolism         | UVM | 0.382831003  |
| UCK2 | Nod_like_receptor_signal    | UVM | 0.007703521  |
| UCK2 | Notch_signaling             | UVM | 0.197880303  |
| UCK2 | One carbon pool by folate   | UVM | 0.279094838  |
| UCK2 | Other glycan degradation    | UVM | -0.443956516 |
| UCK2 | Other types of o-glycan b   | UVM | -0.282169974 |
| UCK2 | Oxidative phosphorylatio    | UVM | 0.160316867  |
| UCK2 | P53_pathway                 | UVM | -0.200302339 |
| UCK2 | P53_signaling_pathway       | UVM | -0.07323442  |
| UCK2 | Pantothenate and coa bios   | UVM | -0.14807768  |
| UCK2 | Pentose and glucuronate in  | UVM | -0.087159768 |
| UCK2 | Pentose phosphate pathwa    | UVM | -0.011982882 |
| UCK2 | Pericyte                    | UVM | 0.296340254  |
| UCK2 | Phenylalanine metabolism    | UVM | -0.172649926 |
| UCK2 | Phenylalanine, tyrosine ar  | UVM | -0.256933109 |
| UCK2 | Phosphonate and phosphir    | UVM | -0.123478864 |
| UCK2 | Pi3k_akt_activation         | UVM | -0.062951664 |

|       |                            |     |              |
|-------|----------------------------|-----|--------------|
| UCK2  | Pi3k_akt_mtor_signaling    | UVM | -0.012233526 |
| UCK2  | Porphyrin and chlorophyl   | UVM | 0.045066611  |
| UCK2  | Primary bile acid biosynt  | UVM | -0.275812626 |
| UCK2  | Propanoate metabolism      | UVM | -0.032229206 |
| UCK2  | Purine metabolism          | UVM | 0.422572965  |
| UCK2  | Pyrimidine metabolism      | UVM | 0.419020538  |
| UCK2  | Pyruvate metabolism        | UVM | 0.063836671  |
| UCK2  | Regulation_of_autophagy    | UVM | -0.475120893 |
| UCK2  | Retinol metabolism         | UVM | -0.212867333 |
| UCK2  | Riboflavin metabolism      | UVM | -0.276160507 |
| UCK2  | Schmahl_pdgf_signaling     | UVM | -0.101342436 |
| UCK2  | Selenocompound metabol     | UVM | 0.46920988   |
| UCK2  | Signaling_by_hippo         | UVM | 0.016414844  |
| UCK2  | Sphingolipid metabolism    | UVM | -0.220041185 |
| UCK2  | Starch and sucrose metabo  | UVM | -0.021564403 |
| UCK2  | Steroid biosynthesis       | UVM | 0.225789853  |
| UCK2  | Steroid hormone biosynth   | UVM | -0.092455445 |
| UCK2  | Sulfur metabolism          | UVM | 0.405622727  |
| UCK2  | Synthesis and degradation  | UVM | 0.090261231  |
| UCK2  | T helper cell              | UVM | 0.068507742  |
| UCK2  | T helper1 (th1) cell       | UVM | 0.020188747  |
| UCK2  | T helper17 (th17) cell     | UVM | 0.052161575  |
| UCK2  | T helper2 (th2) cell       | UVM | 0.058113776  |
| UCK2  | T helper9 (th9) cell       | UVM | -0.009225021 |
| UCK2  | Taurine and hypotaurine r  | UVM | 0.114267273  |
| UCK2  | Terpenoid backbone biosy   | UVM | 0.108807231  |
| UCK2  | Tgf_beta_signaling_pathw   | UVM | -0.070702452 |
| UCK2  | Thiamine metabolism        | UVM | -0.066167953 |
| UCK2  | Tnfa_signaling_via_nfkb    | UVM | 0.095424638  |
| UCK2  | Tryptophan metabolism      | UVM | -0.314781377 |
| UCK2  | Tumor endothelial cell     | UVM | 0.202603083  |
| UCK2  | Tyrosine metabolism        | UVM | -0.25809334  |
| UCK2  | Ubiquinone and other terp  | UVM | 0.211932011  |
| UCK2  | Valine, leucine and isoleu | UVM | 0.298330485  |
| UCK2  | Valine, leucine and isoleu | UVM | -0.089444439 |
| UCK2  | Vascular endothelial cell  | UVM | -0.005902462 |
| UCK2  | Vascular smooth muscle c   | UVM | 0.113146976  |
| UCK2  | Vegf_signaling_pathway     | UVM | 0.032892697  |
| UCK2  | Vitamin b6 metabolism      | UVM | -0.024249173 |
| UCK2  | Willert_wnt_signaling      | UVM | 0.013971151  |
| UCK2  | Wnt_beta_catenin_signali   | UVM | 0.016381184  |
| UCKL1 | Abnormal plasma cell       | UVM | -0.097618328 |
| UCKL1 | Activated b cell           | UVM | -0.13932737  |

|       |                                      |     |              |
|-------|--------------------------------------|-----|--------------|
| UCKL1 | Activated cd4+ t cell                | UVM | -0.082947571 |
| UCKL1 | Activated t cell                     | UVM | -0.14876884  |
| UCKL1 | Alanine, aspartate and glu           | UVM | 0.138414822  |
| UCKL1 | Alcala_apoptosis                     | UVM | -0.234760084 |
| UCKL1 | Alpha-linolenic acid meta            | UVM | -0.248539643 |
| UCKL1 | Amino sugar and nucleoti             | UVM | -0.248604691 |
| UCKL1 | Ampk_pathway                         | UVM | -0.094119815 |
| UCKL1 | Angiogenesis                         | UVM | -0.115545513 |
| UCKL1 | Arachidonic acid metabol             | UVM | -0.275577646 |
| UCKL1 | Arginine and proline meta            | UVM | -0.368075233 |
| UCKL1 | Arginine biosynthesis                | UVM | 0.043331499  |
| UCKL1 | Ascorbate and aldarate me            | UVM | -0.27018599  |
| UCKL1 | Atypical memory b cell               | UVM | -0.242767596 |
| UCKL1 | Axl+siglec6+ dendritic ce            | UVM | 0.064359004  |
| UCKL1 | B cell                               | UVM | -0.080634181 |
| UCKL1 | B1 cell                              | UVM | -0.116300706 |
| UCKL1 | Basal cell                           | UVM | -0.219894018 |
| UCKL1 | Beta-alanine metabolism              | UVM | -0.192293292 |
| UCKL1 | Biosynthesis of unsaturate           | UVM | -0.268769335 |
| UCKL1 | Biotin metabolism                    | UVM | 0.025533454  |
| UCKL1 | Butanoate metabolism                 | UVM | -0.116444736 |
| UCKL1 | Caffeine metabolism                  | UVM | -0.12267236  |
| UCKL1 | Cancer stem cell                     | UVM | -0.05260183  |
| UCKL1 | Cancer stem-like cell                | UVM | 0.087244777  |
| UCKL1 | Cd4+ cytotoxic t cell                | UVM | -0.090784731 |
| UCKL1 | Cd4+ memory t cell                   | UVM | -0.145392828 |
| UCKL1 | Cd4+ regulatory t cell               | UVM | -0.232102408 |
| UCKL1 | Cd4+ t helper cell                   | UVM | -0.1411591   |
| UCKL1 | Cd4+cd25+ regulatory t c             | UVM | -0.143876759 |
| UCKL1 | Cd8+ cytotoxic t cell                | UVM | -0.079254546 |
| UCKL1 | Cd8+ regulatory t cell               | UVM | -0.055097539 |
| UCKL1 | Cell_cycle                           | UVM | -0.023824151 |
| UCKL1 | Chandran_metastasis_top <sup>5</sup> | UVM | 0.087108371  |
| UCKL1 | Citrate cycle (tca cycle)            | UVM | -0.119365482 |
| UCKL1 | Cysteine and methionine r            | UVM | -0.157167587 |
| UCKL1 | Cytokine induced killer c $\epsilon$ | UVM | -0.087380635 |
| UCKL1 | D-arginine and d-ornithin            | UVM | -0.071828466 |
| UCKL1 | D-glutamine and d-glutan             | UVM | 0.397667599  |
| UCKL1 | Dendritic cell                       | UVM | -0.097735357 |
| UCKL1 | Dna_repair                           | UVM | -0.098024422 |
| UCKL1 | Dna_replication                      | UVM | -0.003333415 |
| UCKL1 | Double-negative memory               | UVM | -0.155353166 |
| UCKL1 | Drug metabolism - cytoch             | UVM | -0.228781273 |

|       |                                  |              |
|-------|----------------------------------|--------------|
| UCKL1 | Drug metabolism - other (UVM     | -0.270210175 |
| UCKL1 | E2f_targets UVM                  | -0.055246376 |
| UCKL1 | Ecm_receptor_interaction UVM     | -0.160771387 |
| UCKL1 | Effector cd4+ memory t (UVM      | -0.03515562  |
| UCKL1 | Effector cd8+ memory t (UVM      | -0.093146816 |
| UCKL1 | Effector memory t cell UVM       | -0.127718247 |
| UCKL1 | Effector regulatory t (treg UVM  | -0.120979636 |
| UCKL1 | Elvidge_hif1a_targets_up UVM     | -0.186822992 |
| UCKL1 | Endothelial cell UVM             | 0.173273547  |
| UCKL1 | Eosinophil UVM                   | -0.155194478 |
| UCKL1 | Ether lipid metabolism UVM       | -0.381903437 |
| UCKL1 | Exhausted cd4+ t cell UVM        | -0.000364047 |
| UCKL1 | Exhausted cd8+ t cell UVM        | -0.071323608 |
| UCKL1 | Exhausted t cell UVM             | -0.155174255 |
| UCKL1 | Fat cell (adipocyte) UVM         | -0.122704898 |
| UCKL1 | Fatty acid biosynthesis UVM      | -0.018846576 |
| UCKL1 | Fatty acid degradation UVM       | 0.02069296   |
| UCKL1 | Fatty acid elongation UVM        | -0.3438053   |
| UCKL1 | Fibroblast UVM                   | -0.084836909 |
| UCKL1 | Folate biosynthesis UVM          | -0.152367103 |
| UCKL1 | Follicular b cell UVM            | -0.127413986 |
| UCKL1 | Follicular dendritic cell UVM    | -0.065795399 |
| UCKL1 | Follicular helper (tfh) t ce UVM | -0.159575516 |
| UCKL1 | Follicular t cell UVM            | -0.09606461  |
| UCKL1 | Foxp3+il-17+ t cell UVM          | -0.250193829 |
| UCKL1 | Fructose and mannose me UVM      | -0.26533942  |
| UCKL1 | G2m_checkpoint UVM               | -0.026626656 |
| UCKL1 | Galactose metabolism UVM         | -0.388189887 |
| UCKL1 | Galie_tumor_stemness_ge UVM      | -0.110424458 |
| UCKL1 | Glutathione metabolism UVM       | -0.324708211 |
| UCKL1 | Glycerolipid metabolism UVM      | -0.293621373 |
| UCKL1 | Glycerophospholipid metæ UVM     | -0.235165005 |
| UCKL1 | Glycine, serine and threor UVM   | -0.24910541  |
| UCKL1 | Glycolysis / gluconeogene UVM    | -0.311401946 |
| UCKL1 | Glycosaminoglycan biosy1 UVM     | -0.227085344 |
| UCKL1 | Glycosaminoglycan biosy1 UVM     | -0.308935013 |
| UCKL1 | Glycosaminoglycan biosy1 UVM     | -0.254424594 |
| UCKL1 | Glycosaminoglycan degra UVM      | -0.093112279 |
| UCKL1 | Glycosphingolipid biosyn1 UVM    | -0.155232179 |
| UCKL1 | Glycosphingolipid biosyn1 UVM    | -0.067065951 |
| UCKL1 | Glycosphingolipid biosyn1 UVM    | -0.263055513 |
| UCKL1 | Glycosylphosphatidylinos: UVM    | -0.042915648 |
| UCKL1 | Glyoxylate and dicarboxy UVM     | 0.107616928  |

|       |                             |     |              |
|-------|-----------------------------|-----|--------------|
| UCKL1 | Granulocyte                 | UVM | -0.078442966 |
| UCKL1 | Hedgehog_signaling          | UVM | -0.204141038 |
| UCKL1 | Histidine metabolism        | UVM | -0.16667469  |
| UCKL1 | Hypoxia                     | UVM | -0.18905077  |
| UCKL1 | Il-17alpha t cell           | UVM | -0.128414066 |
| UCKL1 | Il2_stat5_signaling         | UVM | -0.257262453 |
| UCKL1 | Il6_jak_stat3_signaling     | UVM | -0.174827303 |
| UCKL1 | Immune_checkpoints_tun      | UVM | -0.198571076 |
| UCKL1 | Immune_inhibition_cytok     | UVM | -0.179964253 |
| UCKL1 | Inositol phosphate metabo   | UVM | 0.084494878  |
| UCKL1 | Interleukin_6_signaling     | UVM | -0.027800166 |
| UCKL1 | Jaeger_metastasis_up        | UVM | -0.142317879 |
| UCKL1 | Jain_nfkb_signaling         | UVM | 0.072563644  |
| UCKL1 | Kras_signaling_up           | UVM | -0.116423876 |
| UCKL1 | Linoleic acid metabolism    | UVM | -0.349244621 |
| UCKL1 | Lipoic acid metabolism      | UVM | 0.211434921  |
| UCKL1 | Lysine degradation          | UVM | 0.097995407  |
| UCKL1 | Lysosome                    | UVM | -0.339096475 |
| UCKL1 | M1 macrophage               | UVM | -0.040211006 |
| UCKL1 | M2 macrophage               | UVM | -0.059134445 |
| UCKL1 | Mannose type o-glycan bi    | UVM | -0.018689571 |
| UCKL1 | Mapk_signaling_pathway      | UVM | -0.21305598  |
| UCKL1 | Mapk3_erk1_activation       | UVM | -0.196678617 |
| UCKL1 | Marginal zone b cell        | UVM | 0.021019607  |
| UCKL1 | Memory b cell               | UVM | -0.098546075 |
| UCKL1 | Mesenchymal cell            | UVM | -0.118762023 |
| UCKL1 | Mesenchymal stem cell       | UVM | -0.02776388  |
| UCKL1 | Metabolism of xenobiotic    | UVM | -0.262955003 |
| UCKL1 | Migrating cancer stem cel   | UVM | -0.196054291 |
| UCKL1 | Mitotic_spindle             | UVM | 0.078100996  |
| UCKL1 | Monocyte                    | UVM | -0.119750106 |
| UCKL1 | Mtor_signaling_pathway      | UVM | 0.002943548  |
| UCKL1 | Mtorc1_signaling            | UVM | -0.208195398 |
| UCKL1 | Mucin type o-glycan bios    | UVM | -0.015987423 |
| UCKL1 | Myc_targets_v1              | UVM | -0.070551337 |
| UCKL1 | Myeloid cell                | UVM | -0.07920636  |
| UCKL1 | N-glycan biosynthesis       | UVM | -0.315086105 |
| UCKL1 | Naive b cell                | UVM | -0.133609198 |
| UCKL1 | Naive cd4+ t cell           | UVM | -0.080893852 |
| UCKL1 | Naive cd8+ t cell           | UVM | 0.214741159  |
| UCKL1 | Natural killer cell         | UVM | -0.098311408 |
| UCKL1 | Natural killer t (nkt) cell | UVM | 0.133568806  |
| UCKL1 | Natural regulatory t (treg) | UVM | -0.139240495 |



|       |                            |     |              |
|-------|----------------------------|-----|--------------|
| UCKL1 | Neomycin, kanamycin and    | UVM | -0.114955109 |
| UCKL1 | Neutrophil                 | UVM | -0.166306536 |
| UCKL1 | Nicotinate and nicotinami  | UVM | -0.058371093 |
| UCKL1 | Nitrogen metabolism        | UVM | 0.053264212  |
| UCKL1 | Nod_like_receptor_signal   | UVM | -0.14267589  |
| UCKL1 | Notch_signaling            | UVM | -0.175228983 |
| UCKL1 | One carbon pool by folate  | UVM | 0.251141237  |
| UCKL1 | Other glycan degradation   | UVM | 0.026466292  |
| UCKL1 | Other types of o-glycan b  | UVM | -0.198143318 |
| UCKL1 | Oxidative phosphorylatio   | UVM | -0.261106945 |
| UCKL1 | P53_pathway                | UVM | -0.301108147 |
| UCKL1 | P53_signaling_pathway      | UVM | 0.04354318   |
| UCKL1 | Pantothenate and coa bios  | UVM | -0.140640131 |
| UCKL1 | Pentose and glucuronate in | UVM | -0.266374243 |
| UCKL1 | Pentose phosphate pathwa   | UVM | -0.320355145 |
| UCKL1 | Pericyte                   | UVM | -0.087206482 |
| UCKL1 | Phenylalanine metabolism   | UVM | -0.217619961 |
| UCKL1 | Phenylalanine, tyrosine ar | UVM | -0.074084427 |
| UCKL1 | Phosphonate and phosphir   | UVM | -0.233410517 |
| UCKL1 | Pi3k_akt_activation        | UVM | 0.057501016  |
| UCKL1 | Pi3k_akt_mtor_signaling    | UVM | -0.235257485 |
| UCKL1 | Porphyrin and chlorophyl   | UVM | -0.279219035 |
| UCKL1 | Primary bile acid biosynt  | UVM | 0.012199329  |
| UCKL1 | Propanoate metabolism      | UVM | 0.228125309  |
| UCKL1 | Purine metabolism          | UVM | -0.227950184 |
| UCKL1 | Pyrimidine metabolism      | UVM | -0.085296331 |
| UCKL1 | Pyruvate metabolism        | UVM | -0.002064677 |
| UCKL1 | Regulation_of_autophagy    | UVM | 0.297171692  |
| UCKL1 | Retinol metabolism         | UVM | -0.239769219 |
| UCKL1 | Riboflavin metabolism      | UVM | -0.27556727  |
| UCKL1 | Schmahl_pdgf_signaling     | UVM | -0.03524889  |
| UCKL1 | Selenocompound metabol     | UVM | 0.118051083  |
| UCKL1 | Signaling_by_hippo         | UVM | 0.128208671  |
| UCKL1 | Sphingolipid metabolism    | UVM | -0.270523731 |
| UCKL1 | Starch and sucrose metabo  | UVM | -0.241790207 |
| UCKL1 | Steroid biosynthesis       | UVM | -0.197122665 |
| UCKL1 | Steroid hormone biosynth   | UVM | -0.372525988 |
| UCKL1 | Sulfur metabolism          | UVM | -0.233727237 |
| UCKL1 | Synthesis and degradation  | UVM | 0.029270437  |
| UCKL1 | T helper cell              | UVM | -0.163665969 |
| UCKL1 | T helper1 (th1) cell       | UVM | -0.063316881 |
| UCKL1 | T helper17 (th17) cell     | UVM | -0.060025482 |
| UCKL1 | T helper2 (th2) cell       | UVM | -0.065935572 |

|       |                            |     |              |
|-------|----------------------------|-----|--------------|
| UCKL1 | T helper9 (th9) cell       | UVM | -0.121475664 |
| UCKL1 | Taurine and hypotaurine r  | UVM | -0.034772557 |
| UCKL1 | Terpenoid backbone biosy   | UVM | -0.150365755 |
| UCKL1 | Tgf_beta_signaling_pathw   | UVM | 0.055123144  |
| UCKL1 | Thiamine metabolism        | UVM | -0.302704083 |
| UCKL1 | Tnfa_signaling_via_nfkb    | UVM | -0.18473495  |
| UCKL1 | Tryptophan metabolism      | UVM | -0.119399937 |
| UCKL1 | Tumor endothelial cell     | UVM | -0.100466404 |
| UCKL1 | Tyrosine metabolism        | UVM | -0.234657692 |
| UCKL1 | Ubiquinone and other terq  | UVM | -0.003262144 |
| UCKL1 | Valine, leucine and isoleu | UVM | -0.107877116 |
| UCKL1 | Valine, leucine and isoleu | UVM | 0.129243007  |
| UCKL1 | Vascular endothelial cell  | UVM | -0.225725249 |
| UCKL1 | Vascular smooth muscle c   | UVM | -0.146012699 |
| UCKL1 | Vegf_signaling_pathway     | UVM | -0.269215274 |
| UCKL1 | Vitamin b6 metabolism      | UVM | -0.147401067 |
| UCKL1 | Willert_wnt_signaling      | UVM | 0.205178276  |
| UCKL1 | Wnt_beta_catenin_signali   | UVM | 0.062682888  |
| UPP1  | Abnormal plasma cell       | UVM | 0.317415014  |
| UPP1  | Activated b cell           | UVM | 0.312492502  |
| UPP1  | Activated cd4+ t cell      | UVM | 0.162713815  |
| UPP1  | Activated t cell           | UVM | 0.251709774  |
| UPP1  | Alanine, aspartate and glu | UVM | -0.023601183 |
| UPP1  | Alcala_apoptosis           | UVM | 0.449614913  |
| UPP1  | Alpha-linolenic acid meta  | UVM | 0.285199046  |
| UPP1  | Amino sugar and nucleoti   | UVM | 0.291353375  |
| UPP1  | Ampk_pathway               | UVM | -0.147711638 |
| UPP1  | Angiogenesis               | UVM | 0.255782716  |
| UPP1  | Arachidonic acid metabol:  | UVM | 0.298491004  |
| UPP1  | Arginine and proline meta  | UVM | 0.232653499  |
| UPP1  | Arginine biosynthesis      | UVM | 0.033059417  |
| UPP1  | Ascorbate and aldarate me  | UVM | -0.083563051 |
| UPP1  | Atypical memory b cell     | UVM | 0.064272817  |
| UPP1  | Axl+siglec6+ dendritic ce  | UVM | 0.255481554  |
| UPP1  | B cell                     | UVM | 0.220103775  |
| UPP1  | B1 cell                    | UVM | 0.353763659  |
| UPP1  | Basal cell                 | UVM | 0.355119567  |
| UPP1  | Beta-alanine metabolism    | UVM | -0.023147408 |
| UPP1  | Biosynthesis of unsaturate | UVM | 0.231313433  |
| UPP1  | Biotin metabolism          | UVM | -0.010772608 |
| UPP1  | Butanoate metabolism       | UVM | -0.248498696 |
| UPP1  | Caffeine metabolism        | UVM | 0.103841642  |
| UPP1  | Cancer stem cell           | UVM | 0.358173888  |

|      |                              |     |              |
|------|------------------------------|-----|--------------|
| UPP1 | Cancer stem-like cell        | UVM | 0.1327824    |
| UPP1 | Cd4+ cytotoxic t cell        | UVM | 0.373850511  |
| UPP1 | Cd4+ memory t cell           | UVM | 0.230908169  |
| UPP1 | Cd4+ regulatory t cell       | UVM | 0.217610398  |
| UPP1 | Cd4+ t helper cell           | UVM | 0.275331449  |
| UPP1 | Cd4+cd25+ regulatory t c     | UVM | 0.267490995  |
| UPP1 | Cd8+ cytotoxic t cell        | UVM | 0.286908632  |
| UPP1 | Cd8+ regulatory t cell       | UVM | 0.16936749   |
| UPP1 | Cell_cycle                   | UVM | -0.159709997 |
| UPP1 | Chandran_metastasis_top5     | UVM | -0.320228267 |
| UPP1 | Citrate cycle (tca cycle)    | UVM | 0.045930939  |
| UPP1 | Cysteine and methionine r    | UVM | -0.054539508 |
| UPP1 | Cytokine induced killer c    | UVM | 0.389974286  |
| UPP1 | D-arginine and d-ornithin    | UVM | 0.025667815  |
| UPP1 | D-glutamine and d-glutan     | UVM | -0.21128008  |
| UPP1 | Dendritic cell               | UVM | 0.349262747  |
| UPP1 | Dna_repair                   | UVM | -0.132367713 |
| UPP1 | Dna_replication              | UVM | -0.19433238  |
| UPP1 | Double-negative memory       | UVM | 0.24093218   |
| UPP1 | Drug metabolism - cytoch     | UVM | 0.086706481  |
| UPP1 | Drug metabolism - other c    | UVM | 0.197672076  |
| UPP1 | E2f_targets                  | UVM | -0.168867614 |
| UPP1 | Ecm_receptor_interaction     | UVM | 0.10199193   |
| UPP1 | Effector cd4+ memory t (     | UVM | 0.151008683  |
| UPP1 | Effector cd8+ memory t (     | UVM | 0.324099559  |
| UPP1 | Effector memory t cell       | UVM | 0.216052391  |
| UPP1 | Effector regulatory t (treg  | UVM | 0.176022118  |
| UPP1 | Elvidge_hif1a_targets_up     | UVM | 0.195663339  |
| UPP1 | Endothelial cell             | UVM | 0.156918286  |
| UPP1 | Eosinophil                   | UVM | 0.370407369  |
| UPP1 | Ether lipid metabolism       | UVM | 0.174577854  |
| UPP1 | Exhausted cd4+ t cell        | UVM | 0.251247155  |
| UPP1 | Exhausted cd8+ t cell        | UVM | 0.335910594  |
| UPP1 | Exhausted t cell             | UVM | 0.308265278  |
| UPP1 | Fat cell (adipocyte)         | UVM | 0.166102211  |
| UPP1 | Fatty acid biosynthesis      | UVM | 0.206499855  |
| UPP1 | Fatty acid degradation       | UVM | -0.077721312 |
| UPP1 | Fatty acid elongation        | UVM | 0.263485677  |
| UPP1 | Fibroblast                   | UVM | 0.224743309  |
| UPP1 | Folate biosynthesis          | UVM | 0.316283343  |
| UPP1 | Follicular b cell            | UVM | 0.218405684  |
| UPP1 | Follicular dendritic cell    | UVM | -0.036851559 |
| UPP1 | Follicular helper (tfh) t ce | UVM | 0.246357218  |

|      |                            |     |              |
|------|----------------------------|-----|--------------|
| UPP1 | Follicular t cell          | UVM | 0.322802578  |
| UPP1 | Foxp3+il-17+ t cell        | UVM | 0.215763627  |
| UPP1 | Fructose and mannose me    | UVM | 0.302908246  |
| UPP1 | G2m_checkpoint             | UVM | -0.228172528 |
| UPP1 | Galactose metabolism       | UVM | 0.325950553  |
| UPP1 | Galie_tumor_stemness_ge    | UVM | -0.225615115 |
| UPP1 | Glutathione metabolism     | UVM | 0.308771924  |
| UPP1 | Glycerolipid metabolism    | UVM | 0.318134615  |
| UPP1 | Glycerophospholipid metæ   | UVM | 0.33691986   |
| UPP1 | Glycine, serine and threor | UVM | 0.309639834  |
| UPP1 | Glycolysis / gluconeogene  | UVM | 0.291708028  |
| UPP1 | Glycosaminoglycan biosy1   | UVM | 0.155263279  |
| UPP1 | Glycosaminoglycan biosy1   | UVM | 0.009716811  |
| UPP1 | Glycosaminoglycan biosy1   | UVM | 0.250852926  |
| UPP1 | Glycosaminoglycan degra    | UVM | 0.213979411  |
| UPP1 | Glycosphingolipid biosyn1  | UVM | 0.368452393  |
| UPP1 | Glycosphingolipid biosyn1  | UVM | 0.34219957   |
| UPP1 | Glycosphingolipid biosyn1  | UVM | 0.145159242  |
| UPP1 | Glycosylphosphatidylinos:  | UVM | -0.055029477 |
| UPP1 | Glyoxylate and dicarboxy   | UVM | -0.044975027 |
| UPP1 | Granulocyte                | UVM | 0.314488144  |
| UPP1 | Hedgehog_signaling         | UVM | 0.070968819  |
| UPP1 | Histidine metabolism       | UVM | 0.037625938  |
| UPP1 | Hypoxia                    | UVM | 0.303770329  |
| UPP1 | Il-17ralpha t cell         | UVM | 0.32934719   |
| UPP1 | Il2_stat5_signaling        | UVM | 0.399970385  |
| UPP1 | Il6_jak_stat3_signaling    | UVM | 0.351211309  |
| UPP1 | Immune_checkpoints_tur     | UVM | 0.274555096  |
| UPP1 | Immune_inhibition_cytok    | UVM | 0.324108681  |
| UPP1 | Inositol phosphate metabo  | UVM | -0.109575679 |
| UPP1 | Interleukin_6_signaling    | UVM | 0.187754622  |
| UPP1 | Jaeger_metastasis_up       | UVM | 0.133177097  |
| UPP1 | Jain_nfkb_signaling        | UVM | -0.012430618 |
| UPP1 | Kras_signaling_up          | UVM | 0.316892154  |
| UPP1 | Linoleic acid metabolism   | UVM | 0.205022515  |
| UPP1 | Lipoic acid metabolism     | UVM | -0.177597351 |
| UPP1 | Lysine degradation         | UVM | -0.335585695 |
| UPP1 | Lysosome                   | UVM | 0.384379638  |
| UPP1 | M1 macrophage              | UVM | 0.245238894  |
| UPP1 | M2 macrophage              | UVM | 0.210616685  |
| UPP1 | Mannose type o-glycan bi   | UVM | 0.113281574  |
| UPP1 | Mapk_signaling_pathway     | UVM | 0.373289782  |
| UPP1 | Mapk3_erk1_activation      | UVM | 0.075930047  |

|      |                                          |     |              |
|------|------------------------------------------|-----|--------------|
| UPP1 | Marginal zone b cell                     | UVM | 0.098549683  |
| UPP1 | Memory b cell                            | UVM | 0.220579492  |
| UPP1 | Mesenchymal cell                         | UVM | 0.411288572  |
| UPP1 | Mesenchymal stem cell                    | UVM | 0.29833452   |
| UPP1 | Metabolism of xenobiotics                | UVM | 0.168286617  |
| UPP1 | Migrating cancer stem cell               | UVM | 0.218518363  |
| UPP1 | Mitotic_spindle                          | UVM | -0.35472831  |
| UPP1 | Monocyte                                 | UVM | 0.434299868  |
| UPP1 | Mtor_signaling_pathway                   | UVM | 0.00441661   |
| UPP1 | Mtorc1_signaling                         | UVM | 0.222772886  |
| UPP1 | Mucin type o-glycan biosynthesis         | UVM | -0.07825549  |
| UPP1 | Myc_targets_v1                           | UVM | -0.192121213 |
| UPP1 | Myeloid cell                             | UVM | 0.25910789   |
| UPP1 | N-glycan biosynthesis                    | UVM | 0.242794604  |
| UPP1 | Naive b cell                             | UVM | 0.194474415  |
| UPP1 | Naive cd4+ t cell                        | UVM | -0.004600854 |
| UPP1 | Naive cd8+ t cell                        | UVM | -0.080827548 |
| UPP1 | Natural killer cell                      | UVM | 0.277931079  |
| UPP1 | Natural killer t (nkt) cell              | UVM | -0.021922853 |
| UPP1 | Natural regulatory t (treg) cell         | UVM | 0.205756588  |
| UPP1 | Neomycin, kanamycin and streptomycin     | UVM | 0.454699911  |
| UPP1 | Neutrophil                               | UVM | 0.451858013  |
| UPP1 | Nicotinate and nicotinamide              | UVM | 0.069993328  |
| UPP1 | Nitrogen metabolism                      | UVM | 0.122881645  |
| UPP1 | Nod_like_receptor_signaling              | UVM | 0.249263844  |
| UPP1 | Notch_signaling                          | UVM | 0.272204189  |
| UPP1 | One carbon pool by folate                | UVM | -0.259435975 |
| UPP1 | Other glycan degradation                 | UVM | 0.081884444  |
| UPP1 | Other types of o-glycan biosynthesis     | UVM | 0.197892659  |
| UPP1 | Oxidative phosphorylation                | UVM | 0.416730976  |
| UPP1 | P53_pathway                              | UVM | 0.404737665  |
| UPP1 | P53_signaling_pathway                    | UVM | 0.096394572  |
| UPP1 | Pantothenate and coa biosynthesis        | UVM | 0.055256077  |
| UPP1 | Pentose and glucuronate interconversions | UVM | -0.052683401 |
| UPP1 | Pentose phosphate pathway                | UVM | 0.173176507  |
| UPP1 | Pericyte                                 | UVM | 0.288183377  |
| UPP1 | Phenylalanine metabolism                 | UVM | 0.264643799  |
| UPP1 | Phenylalanine, tyrosine and tryptophan   | UVM | 0.331271726  |
| UPP1 | Phosphonate and phosphite metabolism     | UVM | -0.09663657  |
| UPP1 | Pi3k_akt_activation                      | UVM | -0.415679414 |
| UPP1 | Pi3k_akt_mtor_signaling                  | UVM | 0.253675688  |
| UPP1 | Porphyrin and chlorophyll biosynthesis   | UVM | 0.081060711  |
| UPP1 | Primary bile acid biosynthesis           | UVM | 0.145411643  |

|      |                            |     |              |
|------|----------------------------|-----|--------------|
| UPP1 | Propanoate metabolism      | UVM | -0.294929148 |
| UPP1 | Purine metabolism          | UVM | 0.005372696  |
| UPP1 | Pyrimidine metabolism      | UVM | -0.057927048 |
| UPP1 | Pyruvate metabolism        | UVM | 0.044041516  |
| UPP1 | Regulation_of_autophagy    | UVM | -0.161577139 |
| UPP1 | Retinol metabolism         | UVM | 0.183902304  |
| UPP1 | Riboflavin metabolism      | UVM | 0.167860999  |
| UPP1 | Schmahl_pdgf_signaling     | UVM | -0.12060946  |
| UPP1 | Selenocompound metabol     | UVM | -0.096567058 |
| UPP1 | Signaling_by_hippo         | UVM | -0.422253686 |
| UPP1 | Sphingolipid metabolism    | UVM | 0.03176099   |
| UPP1 | Starch and sucrose metabo  | UVM | 0.304120991  |
| UPP1 | Steroid biosynthesis       | UVM | 0.360631475  |
| UPP1 | Steroid hormone biosynth   | UVM | 0.026863334  |
| UPP1 | Sulfur metabolism          | UVM | 0.048253728  |
| UPP1 | Synthesis and degradation  | UVM | 0.020213757  |
| UPP1 | T helper cell              | UVM | 0.321687144  |
| UPP1 | T helper1 (th1) cell       | UVM | 0.269288555  |
| UPP1 | T helper17 (th17) cell     | UVM | 0.306833146  |
| UPP1 | T helper2 (th2) cell       | UVM | 0.283632487  |
| UPP1 | T helper9 (th9) cell       | UVM | 0.238029353  |
| UPP1 | Taurine and hypotaurine r  | UVM | 0.106120108  |
| UPP1 | Terpenoid backbone biosy   | UVM | 0.058280859  |
| UPP1 | Tgf_beta_signaling_pathw   | UVM | -0.333198446 |
| UPP1 | Thiamine metabolism        | UVM | 0.191736368  |
| UPP1 | Tnfa_signaling_via_nfbk    | UVM | 0.459410702  |
| UPP1 | Tryptophan metabolism      | UVM | 0.062778477  |
| UPP1 | Tumor endothelial cell     | UVM | 0.28107893   |
| UPP1 | Tyrosine metabolism        | UVM | 0.169713524  |
| UPP1 | Ubiquinone and other terf  | UVM | 0.239771991  |
| UPP1 | Valine, leucine and isoleu | UVM | 0.469773781  |
| UPP1 | Valine, leucine and isoleu | UVM | -0.172233104 |
| UPP1 | Vascular endothelial cell  | UVM | 0.281071718  |
| UPP1 | Vascular smooth muscle c   | UVM | 0.122791546  |
| UPP1 | Vegf_signaling_pathway     | UVM | 0.160233208  |
| UPP1 | Vitamin b6 metabolism      | UVM | 0.389906499  |
| UPP1 | Willert_wnt_signaling      | UVM | -0.237757255 |
| UPP1 | Wnt_beta_catenin_signali   | UVM | -0.01896479  |
| UPP2 | Abnormal plasma cell       | UVM | -0.053093921 |
| UPP2 | Activated b cell           | UVM | -0.156746102 |
| UPP2 | Activated cd4+ t cell      | UVM | -0.032938754 |
| UPP2 | Activated t cell           | UVM | -0.084225488 |
| UPP2 | Alanine, aspartate and glu | UVM | 0.234931245  |

|      |                            |     |              |
|------|----------------------------|-----|--------------|
| UPP2 | Alcala_apoptosis           | UVM | -0.141285518 |
| UPP2 | Alpha-linolenic acid meta  | UVM | -0.275721821 |
| UPP2 | Amino sugar and nucleoti   | UVM | -0.10337458  |
| UPP2 | Ampk_pathway               | UVM | -0.258652918 |
| UPP2 | Angiogenesis               | UVM | -0.164530435 |
| UPP2 | Arachidonic acid metabol   | UVM | -0.275802202 |
| UPP2 | Arginine and proline meta  | UVM | -0.221219018 |
| UPP2 | Arginine biosynthesis      | UVM | -0.106796277 |
| UPP2 | Ascorbate and aldarate me  | UVM | -0.311893507 |
| UPP2 | Atypical memory b cell     | UVM | -0.162089683 |
| UPP2 | Axl+siglec6+ dendritic ce  | UVM | -0.110335761 |
| UPP2 | B cell                     | UVM | -0.024624402 |
| UPP2 | B1 cell                    | UVM | -0.133638154 |
| UPP2 | Basal cell                 | UVM | -0.249011924 |
| UPP2 | Beta-alanine metabolism    | UVM | -0.149587637 |
| UPP2 | Biosynthesis of unsaturate | UVM | -0.065428114 |
| UPP2 | Biotin metabolism          | UVM | -0.003935811 |
| UPP2 | Butanoate metabolism       | UVM | -0.12174373  |
| UPP2 | Caffeine metabolism        | UVM | -0.051138745 |
| UPP2 | Cancer stem cell           | UVM | 0.013621678  |
| UPP2 | Cancer stem-like cell      | UVM | 0.065998345  |
| UPP2 | Cd4+ cytotoxic t cell      | UVM | -0.040771384 |
| UPP2 | Cd4+ memory t cell         | UVM | -0.078957364 |
| UPP2 | Cd4+ regulatory t cell     | UVM | -0.137626116 |
| UPP2 | Cd4+ t helper cell         | UVM | -0.059435632 |
| UPP2 | Cd4+cd25+ regulatory t c   | UVM | -0.054995832 |
| UPP2 | Cd8+ cytotoxic t cell      | UVM | -0.02954459  |
| UPP2 | Cd8+ regulatory t cell     | UVM | -0.032721765 |
| UPP2 | Cell_cycle                 | UVM | -0.190661764 |
| UPP2 | Chandran_metastasis_top    | UVM | 0.117561963  |
| UPP2 | Citrate cycle (tca cycle)  | UVM | -0.009149217 |
| UPP2 | Cysteine and methionine r  | UVM | -0.239810851 |
| UPP2 | Cytokine induced killer ce | UVM | 0.008293553  |
| UPP2 | D-arginine and d-ornithin  | UVM | 0.010566138  |
| UPP2 | D-glutamine and d-glutan   | UVM | 0.350851086  |
| UPP2 | Dendritic cell             | UVM | -0.150704757 |
| UPP2 | Dna_repair                 | UVM | -0.348526411 |
| UPP2 | Dna_replication            | UVM | -0.3458696   |
| UPP2 | Double-negative memory     | UVM | -0.079575628 |
| UPP2 | Drug metabolism - cytoch   | UVM | -0.273934013 |
| UPP2 | Drug metabolism - other    | UVM | -0.315279898 |
| UPP2 | E2f_targets                | UVM | -0.24847389  |
| UPP2 | Ecm_receptor_interaction   | UVM | -0.262066643 |

|      |                                  |              |
|------|----------------------------------|--------------|
| UPP2 | Effector cd4+ memory t ( UVM     | -0.032009448 |
| UPP2 | Effector cd8+ memory t ( UVM     | 0.002519481  |
| UPP2 | Effector memory t cell UVM       | -0.064108164 |
| UPP2 | Effector regulatory t (treg UVM  | -0.017030354 |
| UPP2 | Elvidge_hif1a_targets_up UVM     | -0.039730596 |
| UPP2 | Endothelial cell UVM             | 0.038379573  |
| UPP2 | Eosinophil UVM                   | -0.093298666 |
| UPP2 | Ether lipid metabolism UVM       | -0.276724848 |
| UPP2 | Exhausted cd4+ t cell UVM        | 0.099569166  |
| UPP2 | Exhausted cd8+ t cell UVM        | 0.069249211  |
| UPP2 | Exhausted t cell UVM             | -0.038866282 |
| UPP2 | Fat cell (adipocyte) UVM         | 0.053743081  |
| UPP2 | Fatty acid biosynthesis UVM      | 0.236256699  |
| UPP2 | Fatty acid degradation UVM       | 0.013076199  |
| UPP2 | Fatty acid elongation UVM        | -0.108161303 |
| UPP2 | Fibroblast UVM                   | -0.078781022 |
| UPP2 | Folate biosynthesis UVM          | -0.113321357 |
| UPP2 | Follicular b cell UVM            | -0.062452483 |
| UPP2 | Follicular dendritic cell UVM    | -0.236069938 |
| UPP2 | Follicular helper (tfh) t ce UVM | -0.065596704 |
| UPP2 | Follicular t cell UVM            | -0.033590504 |
| UPP2 | Foxp3+il-17+ t cell UVM          | -0.210970356 |
| UPP2 | Fructose and mannose me UVM      | -0.176110633 |
| UPP2 | G2m_checkpoint UVM               | -0.211012166 |
| UPP2 | Galactose metabolism UVM         | -0.26662626  |
| UPP2 | Galie_tumor_stemness_ge UVM      | -0.247206827 |
| UPP2 | Glutathione metabolism UVM       | -0.274418506 |
| UPP2 | Glycerolipid metabolism UVM      | -0.146297986 |
| UPP2 | Glycerophospholipid metæ UVM     | -0.158517443 |
| UPP2 | Glycine, serine and threor UVM   | -0.270824838 |
| UPP2 | Glycolysis / gluconeogene UVM    | -0.132601689 |
| UPP2 | Glycosaminoglycan biosy1 UVM     | -0.369777658 |
| UPP2 | Glycosaminoglycan biosy1 UVM     | -0.078352532 |
| UPP2 | Glycosaminoglycan biosy1 UVM     | -0.316367541 |
| UPP2 | Glycosaminoglycan degra UVM      | -0.37651869  |
| UPP2 | Glycosphingolipid biosyn1 UVM    | -0.086870998 |
| UPP2 | Glycosphingolipid biosyn1 UVM    | -0.164473805 |
| UPP2 | Glycosphingolipid biosyn1 UVM    | -0.185890008 |
| UPP2 | Glycosylphosphatidylinos: UVM    | -0.002135306 |
| UPP2 | Glyoxylate and dicarboxy UVM     | -0.111712682 |
| UPP2 | Granulocyte UVM                  | -0.034722765 |
| UPP2 | Hedgehog_signaling UVM           | -0.104503799 |
| UPP2 | Histidine metabolism UVM         | -0.191209987 |



|      |                             |     |              |
|------|-----------------------------|-----|--------------|
| UPP2 | Hypoxia                     | UVM | -0.12760635  |
| UPP2 | Il-17alpha t cell           | UVM | -0.043754347 |
| UPP2 | Il2_stat5_signaling         | UVM | -0.167515977 |
| UPP2 | Il6_jak_stat3_signaling     | UVM | -0.086522303 |
| UPP2 | Immune_checkpoints_tur      | UVM | -0.117465899 |
| UPP2 | Immune_inhibition_cytok     | UVM | -0.269411656 |
| UPP2 | Inositol phosphate metabo   | UVM | 0.26713047   |
| UPP2 | Interleukin_6_signaling     | UVM | 0.163290343  |
| UPP2 | Jaeger_metastasis_up        | UVM | -0.16767257  |
| UPP2 | Jain_nfkb_signaling         | UVM | -0.091336662 |
| UPP2 | Kras_signaling_up           | UVM | -0.029890785 |
| UPP2 | Linoleic acid metabolism    | UVM | -0.235778369 |
| UPP2 | Lipoic acid metabolism      | UVM | 0.173125695  |
| UPP2 | Lysine degradation          | UVM | -0.017625644 |
| UPP2 | Lysosome                    | UVM | -0.198187876 |
| UPP2 | M1 macrophage               | UVM | 0.007806145  |
| UPP2 | M2 macrophage               | UVM | -0.17798998  |
| UPP2 | Mannose type o-glycan bi    | UVM | 0.056190556  |
| UPP2 | Mapk_signaling_pathway      | UVM | 0.049232745  |
| UPP2 | Mapk3_erk1_activation       | UVM | -0.066725804 |
| UPP2 | Marginal zone b cell        | UVM | -0.09425303  |
| UPP2 | Memory b cell               | UVM | -0.021317984 |
| UPP2 | Mesenchymal cell            | UVM | -0.025929823 |
| UPP2 | Mesenchymal stem cell       | UVM | 0.001292786  |
| UPP2 | Metabolism of xenobiotic    | UVM | -0.346751827 |
| UPP2 | Migrating cancer stem cel   | UVM | -0.07523394  |
| UPP2 | Mitotic_spindle             | UVM | -0.003268954 |
| UPP2 | Monocyte                    | UVM | -0.054742842 |
| UPP2 | Mtor_signaling_pathway      | UVM | 0.18599071   |
| UPP2 | Mtorc1_signaling            | UVM | -0.05190246  |
| UPP2 | Mucin type o-glycan biosy   | UVM | -0.087362619 |
| UPP2 | Myc_targets_v1              | UVM | -0.205004764 |
| UPP2 | Myeloid cell                | UVM | -0.064154665 |
| UPP2 | N-glycan biosynthesis       | UVM | -0.258416596 |
| UPP2 | Naive b cell                | UVM | -0.083792475 |
| UPP2 | Naive cd4+ t cell           | UVM | -0.140666504 |
| UPP2 | Naive cd8+ t cell           | UVM | 0.251815977  |
| UPP2 | Natural killer cell         | UVM | -0.062639677 |
| UPP2 | Natural killer t (nkt) cell | UVM | 0.096422939  |
| UPP2 | Natural regulatory t (treg) | UVM | -0.071472744 |
| UPP2 | Neomycin, kanamycin and     | UVM | 0.047206998  |
| UPP2 | Neutrophil                  | UVM | -0.104367216 |
| UPP2 | Nicotinate and nicotinami   | UVM | -0.15631503  |

|      |                            |     |              |
|------|----------------------------|-----|--------------|
| UPP2 | Nitrogen metabolism        | UVM | 0.216314903  |
| UPP2 | Nod_like_receptor_signal   | UVM | -0.059771529 |
| UPP2 | Notch_signaling            | UVM | -0.112397466 |
| UPP2 | One carbon pool by folate  | UVM | -0.012353429 |
| UPP2 | Other glycan degradation   | UVM | -0.141496601 |
| UPP2 | Other types of o-glycan b  | UVM | -0.317929325 |
| UPP2 | Oxidative phosphorylatio   | UVM | -0.195298742 |
| UPP2 | P53_pathway                | UVM | -0.262118139 |
| UPP2 | P53_signaling_pathway      | UVM | -0.101985414 |
| UPP2 | Pantothenate and coa bios  | UVM | -0.174069323 |
| UPP2 | Pentose and glucuronate in | UVM | -0.418663297 |
| UPP2 | Pentose phosphate pathwa   | UVM | -0.285359134 |
| UPP2 | Pericyte                   | UVM | -0.016454293 |
| UPP2 | Phenylalanine metabolism   | UVM | -0.181611854 |
| UPP2 | Phenylalanine, tyrosine ar | UVM | -0.052622278 |
| UPP2 | Phosphonate and phosphir   | UVM | -0.17307873  |
| UPP2 | Pi3k_akt_activation        | UVM | -0.095086446 |
| UPP2 | Pi3k_akt_mtor_signaling    | UVM | -0.048674677 |
| UPP2 | Porphyrin and chlorophyl   | UVM | -0.496336654 |
| UPP2 | Primary bile acid biosynt  | UVM | 0.08199919   |
| UPP2 | Propanoate metabolism      | UVM | 0.101905788  |
| UPP2 | Purine metabolism          | UVM | -0.338350514 |
| UPP2 | Pyrimidine metabolism      | UVM | -0.437731089 |
| UPP2 | Pyruvate metabolism        | UVM | 0.031223938  |
| UPP2 | Regulation_of_autophagy    | UVM | 0.315901912  |
| UPP2 | Retinol metabolism         | UVM | -0.3236036   |
| UPP2 | Riboflavin metabolism      | UVM | -0.336681676 |
| UPP2 | Schmahl_pdgf_signaling     | UVM | 0.009016862  |
| UPP2 | Selenocompound metabol     | UVM | 0.016937732  |
| UPP2 | Signaling_by_hippo         | UVM | -0.021880511 |
| UPP2 | Sphingolipid metabolism    | UVM | -0.112843663 |
| UPP2 | Starch and sucrose metabo  | UVM | 0.048622647  |
| UPP2 | Steroid biosynthesis       | UVM | -0.049886738 |
| UPP2 | Steroid hormone biosynth   | UVM | -0.305471353 |
| UPP2 | Sulfur metabolism          | UVM | -0.208891703 |
| UPP2 | Synthesis and degradation  | UVM | 0.073469327  |
| UPP2 | T helper cell              | UVM | -0.068843987 |
| UPP2 | T helper1 (th1) cell       | UVM | -0.02868754  |
| UPP2 | T helper17 (th17) cell     | UVM | -0.009096763 |
| UPP2 | T helper2 (th2) cell       | UVM | -0.071782986 |
| UPP2 | T helper9 (th9) cell       | UVM | -0.08747365  |
| UPP2 | Taurine and hypotaurine r  | UVM | -0.001055589 |
| UPP2 | Terpenoid backbone biosy   | UVM | -0.247096706 |

|      |                            |     |              |
|------|----------------------------|-----|--------------|
| UPP2 | Tgf_beta_signaling_pathw   | UVM | -0.217058791 |
| UPP2 | Thiamine metabolism        | UVM | -0.349367793 |
| UPP2 | Tnfa_signaling_via_nfk     | UVM | -0.110916268 |
| UPP2 | Tryptophan metabolism      | UVM | -0.192072023 |
| UPP2 | Tumor endothelial cell     | UVM | -0.00857908  |
| UPP2 | Tyrosine metabolism        | UVM | -0.272191816 |
| UPP2 | Ubiquinone and other ter   | UVM | -0.099689564 |
| UPP2 | Valine, leucine and isoleu | UVM | -0.165672264 |
| UPP2 | Valine, leucine and isoleu | UVM | -0.028588623 |
| UPP2 | Vascular endothelial cell  | UVM | -0.273903922 |
| UPP2 | Vascular smooth muscle c   | UVM | -0.217399329 |
| UPP2 | Vegf_signaling_pathway     | UVM | -0.247776026 |
| UPP2 | Vitamin b6 metabolism      | UVM | -0.124467245 |
| UPP2 | Willert_wnt_signaling      | UVM | -0.153833938 |
| UPP2 | Wnt_beta_catenin_signali   | UVM | -0.047437921 |

ation/Metastasis- associated biological terms in different cancers

| p-value     | Group                    |
|-------------|--------------------------|
| 0.520113163 | TME                      |
| 0.2824878   | TME                      |
| 0.000816784 | TME                      |
| 0.004724531 | TME                      |
| 0.00162049  | Metabolism               |
| 0.530247044 | Proliferation/Metastasis |
| 0.583030212 | Metabolism               |
| 0.729416614 | Metabolism               |
| 0.000412682 | Proliferation/Metastasis |
| 0.035969821 | Proliferation/Metastasis |
| 0.006607126 | Metabolism               |
| 0.709922276 | Metabolism               |
| 0.134575162 | Metabolism               |
| 0.67615105  | Metabolism               |
| 0.751892223 | TME                      |
| 0.010620938 | TME                      |
| 0.006375129 | TME                      |
| 0.474716075 | TME                      |
| 0.003183905 | TME                      |
| 0.744425207 | Metabolism               |
| 0.435036606 | Metabolism               |
| 0.806754802 | Metabolism               |
| 0.206878184 | Metabolism               |
| 0.765968941 | Metabolism               |
| 0.01288362  | TME                      |
| 0.175279802 | TME                      |
| 0.000601264 | TME                      |
| 0.855125913 | TME                      |
| 0.00125623  | TME                      |
| 0.000177534 | TME                      |
| 0.000572617 | TME                      |
| 0.000222529 | TME                      |
| 0.010512041 | TME                      |
| 0.007835369 | Proliferation/Metastasis |
| 3.85E-06    | Proliferation/Metastasis |
| 0.063956175 | Metabolism               |
| 0.100852082 | Metabolism               |
| 0.092184812 | TME                      |
| 0.643405314 | Metabolism               |
| 0.02710168  | Metabolism               |
| 0.001642667 | TME                      |

|             |                          |
|-------------|--------------------------|
| 0.443198889 | Proliferation/Metastasis |
| 0.159635    | Proliferation/Metastasis |
| 0.075933598 | TME                      |
| 0.051389595 | Metabolism               |
| 0.028023156 | Metabolism               |
| 0.034128325 | Proliferation/Metastasis |
| 0.586971331 | Proliferation/Metastasis |
| 0.003844947 | TME                      |
| 0.001513532 | TME                      |
| 0.020219469 | TME                      |
| 0.002522008 | TME                      |
| 0.121948605 | Proliferation/Metastasis |
| 0.001536331 | TME                      |
| 0.000269004 | TME                      |
| 0.605203108 | Metabolism               |
| 0.139985342 | TME                      |
| 0.027461529 | TME                      |
| 0.00016237  | TME                      |
| 0.215238047 | TME                      |
| 0.814190086 | Metabolism               |
| 0.431501585 | Metabolism               |
| 0.484283777 | Metabolism               |
| 0.010884029 | TME                      |
| 0.461635109 | Metabolism               |
| 0.0015069   | TME                      |
| 0.483438567 | TME                      |
| 0.032878838 | TME                      |
| 0.00042642  | TME                      |
| 0.313252218 | TME                      |
| 0.505998695 | Metabolism               |
| 0.011497567 | Proliferation/Metastasis |
| 0.272806388 | Metabolism               |
| 0.975519568 | Proliferation/Metastasis |
| 0.097521181 | Metabolism               |
| 0.859754088 | Metabolism               |
| 0.458650766 | Metabolism               |
| 0.940685197 | Metabolism               |
| 0.086431106 | Metabolism               |
| 0.019745424 | Metabolism               |
| 0.075103608 | Metabolism               |
| 0.618086932 | Metabolism               |
| 0.579966934 | Metabolism               |
| 0.18338291  | Metabolism               |

|             |                          |
|-------------|--------------------------|
| 0.018658166 | Metabolism               |
| 0.661331919 | Metabolism               |
| 0.338045288 | Metabolism               |
| 0.056478762 | Metabolism               |
| 0.000436248 | TME                      |
| 0.059420191 | Proliferation/Metastasis |
| 0.006946088 | Metabolism               |
| 0.936759654 | Proliferation/Metastasis |
| 0.099469393 | TME                      |
| 0.002240062 | Proliferation/Metastasis |
| 0.005552048 | Proliferation/Metastasis |
| 0.051876907 | TME                      |
| 9.83E-05    | TME                      |
| 0.043037698 | Metabolism               |
| 0.995938992 | Metabolism               |
| 0.195008794 | Proliferation/Metastasis |
| 0.112315777 | Proliferation/Metastasis |
| 0.000233498 | Proliferation/Metastasis |
| 0.68782826  | Metabolism               |
| 0.070484426 | Metabolism               |
| 0.022793873 | Metabolism               |
| 0.852530391 | Proliferation/Metastasis |
| 0.014531384 | TME                      |
| 0.001425156 | TME                      |
| 0.060780195 | Metabolism               |
| 0.837912311 | Proliferation/Metastasis |
| 0.051692582 | Metabolism               |
| 0.149578083 | TME                      |
| 0.009563936 | TME                      |
| 0.011930561 | TME                      |
| 0.003183003 | TME                      |
| 0.008528546 | Metabolism               |
| 0.555597083 | TME                      |
| 6.92E-05    | Proliferation/Metastasis |
| 0.000265329 | TME                      |
| 0.391471519 | Proliferation/Metastasis |
| 0.041754511 | Proliferation/Metastasis |
| 0.024421646 | Metabolism               |
| 0.127840857 | Proliferation/Metastasis |
| 0.000850358 | TME                      |
| 0.002679484 | Metabolism               |
| 0.009017935 | TME                      |
| 0.009461442 | TME                      |

|             |                          |
|-------------|--------------------------|
| 0.573568882 | TME                      |
| 0.002936401 | TME                      |
| 0.09490122  | TME                      |
| 0.128034957 | TME                      |
| 0.888183295 | Metabolism               |
| 0.000201764 | TME                      |
| 0.94099956  | Metabolism               |
| 0.241945786 | Metabolism               |
| 0.020513608 | Proliferation/Metastasis |
| 0.013073259 | Proliferation/Metastasis |
| 0.118672152 | Metabolism               |
| 0.882594782 | Metabolism               |
| 0.493596522 | Metabolism               |
| 0.140980761 | Metabolism               |
| 0.004457317 | Proliferation/Metastasis |
| 0.051095598 | Proliferation/Metastasis |
| 0.075035254 | Metabolism               |
| 0.724931907 | Metabolism               |
| 0.289909947 | Metabolism               |
| 0.002844034 | TME                      |
| 0.091858693 | Metabolism               |
| 0.542123988 | Metabolism               |
| 0.513474796 | Metabolism               |
| 0.323793032 | Metabolism               |
| 0.293391777 | Proliferation/Metastasis |
| 0.621500956 | Metabolism               |
| 0.268821905 | Metabolism               |
| 0.00625743  | Metabolism               |
| 0.367177209 | Metabolism               |
| 0.330639288 | Metabolism               |
| 0.033829338 | Metabolism               |
| 0.114047612 | Proliferation/Metastasis |
| 0.586880896 | Metabolism               |
| 0.820717798 | Metabolism               |
| 0.129703282 | Proliferation/Metastasis |
| 0.027743373 | Metabolism               |
| 0.000286799 | Metabolism               |
| 0.000117868 | Metabolism               |
| 0.77858126  | Metabolism               |
| 0.114062838 | Metabolism               |
| 0.626914148 | Metabolism               |
| 0.146720307 | Metabolism               |
| 0.314348577 | Metabolism               |

|             |                          |
|-------------|--------------------------|
| 0.006718064 | TME                      |
| 0.000762762 | TME                      |
| 0.003025084 | TME                      |
| 0.00021063  | TME                      |
| 0.000557184 | TME                      |
| 0.435445406 | Metabolism               |
| 0.06251367  | Metabolism               |
| 0.775228247 | Proliferation/Metastasis |
| 0.692367161 | Metabolism               |
| 0.00989283  | Proliferation/Metastasis |
| 0.49491854  | Metabolism               |
| 0.779497506 | TME                      |
| 0.056809674 | Metabolism               |
| 0.41035501  | Metabolism               |
| 0.196729466 | Metabolism               |
| 0.03191269  | Metabolism               |
| 0.000249507 | TME                      |
| 0.000725017 | TME                      |
| 0.386551473 | Proliferation/Metastasis |
| 0.019689457 | Metabolism               |
| 0.282481818 | Proliferation/Metastasis |
| 0.963817361 | Proliferation/Metastasis |
| 0.19319351  | TME                      |
| 0.442258209 | TME                      |
| 0.101228568 | TME                      |
| 0.276908484 | TME                      |
| 0.013855598 | Metabolism               |
| 0.19667817  | Proliferation/Metastasis |
| 0.05005121  | Metabolism               |
| 0.104378364 | Metabolism               |
| 0.090741139 | Proliferation/Metastasis |
| 0.639985144 | Proliferation/Metastasis |
| 0.125229243 | Metabolism               |
| 0.129646326 | Metabolism               |
| 0.000234711 | Metabolism               |
| 0.346185236 | Metabolism               |
| 0.425808166 | TME                      |
| 0.713222144 | TME                      |
| 0.041291697 | TME                      |
| 0.236963666 | TME                      |
| 0.358333198 | TME                      |
| 0.415348416 | Metabolism               |
| 0.420261965 | Metabolism               |



|             |                          |
|-------------|--------------------------|
| 0.88573186  | Metabolism               |
| 0.5602845   | Metabolism               |
| 0.758275333 | Metabolism               |
| 0.040598361 | TME                      |
| 0.188681529 | TME                      |
| 0.189721436 | TME                      |
| 0.01939683  | TME                      |
| 0.446207385 | TME                      |
| 0.287857285 | TME                      |
| 0.187269988 | TME                      |
| 0.149144808 | TME                      |
| 0.17240781  | TME                      |
| 0.481758245 | Proliferation/Metastasis |
| 0.038206194 | Proliferation/Metastasis |
| 0.19575037  | Metabolism               |
| 0.1555702   | Metabolism               |
| 0.619828299 | TME                      |
| 0.592305852 | Metabolism               |
| 0.00753891  | Metabolism               |
| 0.075942009 | TME                      |
| 0.005184699 | Proliferation/Metastasis |
| 0.169212431 | Proliferation/Metastasis |
| 0.755920485 | TME                      |
| 0.726219934 | Metabolism               |
| 0.155692853 | Metabolism               |
| 0.39285757  | Proliferation/Metastasis |
| 0.015007215 | Proliferation/Metastasis |
| 0.038638882 | TME                      |
| 0.083682921 | TME                      |
| 0.077375781 | TME                      |
| 0.096148778 | TME                      |
| 0.004069744 | Proliferation/Metastasis |
| 0.259572592 | TME                      |
| 0.192671726 | TME                      |
| 0.915108081 | Metabolism               |
| 0.010017472 | TME                      |
| 0.011104585 | TME                      |
| 0.356340786 | TME                      |
| 0.243553573 | TME                      |
| 0.196996976 | Metabolism               |
| 0.306187497 | Metabolism               |
| 0.744815293 | Metabolism               |
| 0.10963381  | TME                      |

|             |                          |
|-------------|--------------------------|
| 0.144839832 | Metabolism               |
| 0.197416312 | TME                      |
| 0.020604275 | TME                      |
| 0.142182145 | TME                      |
| 0.263574335 | TME                      |
| 0.065824806 | TME                      |
| 0.324253409 | Metabolism               |
| 0.689330178 | Proliferation/Metastasis |
| 0.912530186 | Metabolism               |
| 0.494733404 | Proliferation/Metastasis |
| 0.928199374 | Metabolism               |
| 0.576798079 | Metabolism               |
| 0.407322483 | Metabolism               |
| 0.779538013 | Metabolism               |
| 0.215836212 | Metabolism               |
| 0.676385119 | Metabolism               |
| 0.19218304  | Metabolism               |
| 0.985698042 | Metabolism               |
| 0.549496422 | Metabolism               |
| 0.198114526 | Metabolism               |
| 0.031013854 | Metabolism               |
| 0.056416991 | Metabolism               |
| 0.551548238 | Metabolism               |
| 0.507913154 | Metabolism               |
| 0.241729968 | TME                      |
| 0.135518782 | Proliferation/Metastasis |
| 0.536068771 | Metabolism               |
| 0.138934567 | Proliferation/Metastasis |
| 0.07110962  | TME                      |
| 0.066617169 | Proliferation/Metastasis |
| 0.050072518 | Proliferation/Metastasis |
| 0.261278875 | TME                      |
| 0.3302352   | TME                      |
| 0.078921702 | Metabolism               |
| 1.88E-05    | Metabolism               |
| 0.942541191 | Proliferation/Metastasis |
| 0.129083592 | Proliferation/Metastasis |
| 0.014085296 | Proliferation/Metastasis |
| 0.082828364 | Metabolism               |
| 0.431360502 | Metabolism               |
| 0.622545587 | Metabolism               |
| 0.177308938 | Proliferation/Metastasis |
| 0.087376109 | TME                      |

|             |                          |
|-------------|--------------------------|
| 0.050702763 | TME                      |
| 0.048307918 | Metabolism               |
| 0.002099986 | Proliferation/Metastasis |
| 1.34E-05    | Metabolism               |
| 0.038795151 | TME                      |
| 0.161405247 | TME                      |
| 0.986409201 | TME                      |
| 0.037503737 | TME                      |
| 0.487678695 | Metabolism               |
| 0.008055943 | TME                      |
| 0.010751917 | Proliferation/Metastasis |
| 0.118542419 | TME                      |
| 0.150084652 | Proliferation/Metastasis |
| 0.418051257 | Proliferation/Metastasis |
| 0.006918963 | Metabolism               |
| 0.326426292 | Proliferation/Metastasis |
| 0.067118812 | TME                      |
| 0.225798129 | Metabolism               |
| 0.849865096 | TME                      |
| 0.090442185 | TME                      |
| 0.657714558 | TME                      |
| 0.155005592 | TME                      |
| 0.180231027 | TME                      |
| 0.052939524 | TME                      |
| 0.257052291 | Metabolism               |
| 0.116854964 | TME                      |
| 0.016485816 | Metabolism               |
| 3.09E-06    | Metabolism               |
| 0.001036246 | Proliferation/Metastasis |
| 0.048361189 | Proliferation/Metastasis |
| 0.924707773 | Metabolism               |
| 0.606532636 | Metabolism               |
| 0.214752161 | Metabolism               |
| 0.054975148 | Metabolism               |
| 0.760735681 | Proliferation/Metastasis |
| 0.33445485  | Proliferation/Metastasis |
| 0.073862057 | Metabolism               |
| 0.209977384 | Metabolism               |
| 0.831234779 | Metabolism               |
| 0.408678426 | TME                      |
| 0.314121704 | Metabolism               |
| 0.870577083 | Metabolism               |
| 0.292238947 | Metabolism               |

|             |                          |
|-------------|--------------------------|
| 0.045957834 | Metabolism               |
| 0.080781894 | Proliferation/Metastasis |
| 0.815262548 | Metabolism               |
| 0.102335045 | Metabolism               |
| 0.095823585 | Metabolism               |
| 0.985955125 | Metabolism               |
| 0.445529942 | Metabolism               |
| 0.694663203 | Metabolism               |
| 0.00011599  | Proliferation/Metastasis |
| 0.453397999 | Metabolism               |
| 0.521507657 | Metabolism               |
| 0.355256759 | Proliferation/Metastasis |
| 0.724151705 | Metabolism               |
| 0.024648345 | Metabolism               |
| 0.111008018 | Metabolism               |
| 0.210808091 | Metabolism               |
| 0.413697551 | Metabolism               |
| 0.41298291  | Metabolism               |
| 0.662675655 | Metabolism               |
| 0.547494267 | Metabolism               |
| 0.08072387  | TME                      |
| 0.109127902 | TME                      |
| 0.341114324 | TME                      |
| 0.226371032 | TME                      |
| 0.427092469 | TME                      |
| 0.749526215 | Metabolism               |
| 0.261371728 | Metabolism               |
| 0.040326623 | Proliferation/Metastasis |
| 0.017283323 | Metabolism               |
| 0.070748056 | Proliferation/Metastasis |
| 0.813119103 | Metabolism               |
| 0.43462594  | TME                      |
| 0.775183044 | Metabolism               |
| 0.192202127 | Metabolism               |
| 0.443683837 | Metabolism               |
| 0.587490226 | Metabolism               |
| 0.093614846 | TME                      |
| 0.312585127 | TME                      |
| 0.045043183 | Proliferation/Metastasis |
| 0.458632675 | Metabolism               |
| 0.101747765 | Proliferation/Metastasis |
| 0.440565194 | Proliferation/Metastasis |
| 0.022864046 | TME                      |

|             |                          |
|-------------|--------------------------|
| 0.21942532  | TME                      |
| 0.000968395 | TME                      |
| 8.15E-05    | TME                      |
| 0.95185278  | Metabolism               |
| 6.02E-05    | Proliferation/Metastasis |
| 0.004688972 | Metabolism               |
| 0.262220602 | Metabolism               |
| 0.671591964 | Proliferation/Metastasis |
| 0.007892612 | Proliferation/Metastasis |
| 0.465085502 | Metabolism               |
| 0.683498008 | Metabolism               |
| 0.32553036  | Metabolism               |
| 0.025969004 | Metabolism               |
| 0.308037526 | TME                      |
| 0.007752028 | TME                      |
| 0.000244905 | TME                      |
| 0.981915857 | TME                      |
| 4.00E-07    | TME                      |
| 0.165468693 | Metabolism               |
| 0.244035086 | Metabolism               |
| 0.254863772 | Metabolism               |
| 0.003117765 | Metabolism               |
| 0.964579155 | Metabolism               |
| 5.13E-05    | TME                      |
| 0.000712901 | TME                      |
| 0.000298205 | TME                      |
| 0.574541614 | TME                      |
| 0.015512238 | TME                      |
| 0.006694495 | TME                      |
| 0.005239601 | TME                      |
| 0.000266617 | TME                      |
| 9.13E-05    | TME                      |
| 0.045695081 | Proliferation/Metastasis |
| 0.084296424 | Proliferation/Metastasis |
| 0.168163416 | Metabolism               |
| 0.854167801 | Metabolism               |
| 0.620415756 | TME                      |
| 0.81961143  | Metabolism               |
| 0.135039478 | Metabolism               |
| 0.00033321  | TME                      |
| 0.031904211 | Proliferation/Metastasis |
| 0.001222249 | Proliferation/Metastasis |
| 0.18869976  | TME                      |

|             |                          |
|-------------|--------------------------|
| 0.246674691 | Metabolism               |
| 0.002922183 | Metabolism               |
| 0.000789408 | Proliferation/Metastasis |
| 0.001646047 | Proliferation/Metastasis |
| 0.010623609 | TME                      |
| 8.63E-05    | TME                      |
| 0.01356521  | TME                      |
| 0.003389613 | TME                      |
| 0.754361289 | Proliferation/Metastasis |
| 1.28E-06    | TME                      |
| 0.000689966 | TME                      |
| 0.015579585 | Metabolism               |
| 0.000114109 | TME                      |
| 7.59E-06    | TME                      |
| 0.002852204 | TME                      |
| 0.666666639 | TME                      |
| 0.320900817 | Metabolism               |
| 0.007166459 | Metabolism               |
| 0.929527375 | Metabolism               |
| 0.001814331 | TME                      |
| 0.291541863 | Metabolism               |
| 0.040809349 | TME                      |
| 0.005026988 | TME                      |
| 0.001751178 | TME                      |
| 0.002517839 | TME                      |
| 0.673243762 | TME                      |
| 0.512281715 | Metabolism               |
| 0.001095342 | Proliferation/Metastasis |
| 0.037340316 | Metabolism               |
| 0.707718166 | Proliferation/Metastasis |
| 0.015735054 | Metabolism               |
| 0.631484465 | Metabolism               |
| 0.152592623 | Metabolism               |
| 0.690439682 | Metabolism               |
| 0.653677276 | Metabolism               |
| 0.013306131 | Metabolism               |
| 0.147073288 | Metabolism               |
| 0.003790689 | Metabolism               |
| 0.18143625  | Metabolism               |
| 0.939490739 | Metabolism               |
| 0.436254418 | Metabolism               |
| 0.007002723 | Metabolism               |
| 0.937192729 | Metabolism               |

|             |                          |
|-------------|--------------------------|
| 0.187183828 | Metabolism               |
| 0.000284573 | TME                      |
| 0.118742197 | Proliferation/Metastasis |
| 0.743486123 | Metabolism               |
| 0.009541558 | Proliferation/Metastasis |
| 0.068781827 | TME                      |
| 7.95E-07    | Proliferation/Metastasis |
| 2.84E-05    | Proliferation/Metastasis |
| 0.00256487  | TME                      |
| 3.23E-06    | TME                      |
| 0.032236162 | Metabolism               |
| 0.010656958 | Metabolism               |
| 0.03340161  | Proliferation/Metastasis |
| 0.018954787 | Proliferation/Metastasis |
| 0.003810526 | Proliferation/Metastasis |
| 0.005617504 | Metabolism               |
| 0.071707119 | Metabolism               |
| 0.273949777 | Metabolism               |
| 0.71001891  | Proliferation/Metastasis |
| 0.000620425 | TME                      |
| 0.004002875 | TME                      |
| 0.157258184 | Metabolism               |
| 0.594472523 | Proliferation/Metastasis |
| 0.409111759 | Metabolism               |
| 0.070027364 | TME                      |
| 0.063442706 | TME                      |
| 0.000282589 | TME                      |
| 0.000386882 | TME                      |
| 0.882451895 | Metabolism               |
| 5.70E-08    | TME                      |
| 0.131820927 | Proliferation/Metastasis |
| 0.000215709 | TME                      |
| 0.061803534 | Proliferation/Metastasis |
| 0.205581169 | Proliferation/Metastasis |
| 0.320442099 | Metabolism               |
| 0.008537856 | Proliferation/Metastasis |
| 0.001093616 | TME                      |
| 0.680443664 | Metabolism               |
| 0.006110966 | TME                      |
| 0.209533943 | TME                      |
| 0.435251012 | TME                      |
| 0.001012205 | TME                      |
| 3.79E-06    | TME                      |

|             |                          |
|-------------|--------------------------|
| 0.220473112 | TME                      |
| 0.041141728 | Metabolism               |
| 1.64E-05    | TME                      |
| 0.254034192 | Metabolism               |
| 0.748979078 | Metabolism               |
| 0.000165461 | Proliferation/Metastasis |
| 0.069050046 | Proliferation/Metastasis |
| 0.000228528 | Metabolism               |
| 0.944081443 | Metabolism               |
| 0.048395469 | Metabolism               |
| 0.3020466   | Metabolism               |
| 0.112593027 | Proliferation/Metastasis |
| 0.050286203 | Proliferation/Metastasis |
| 0.503999426 | Metabolism               |
| 0.808660223 | Metabolism               |
| 0.419048084 | Metabolism               |
| 0.007239097 | TME                      |
| 0.360065144 | Metabolism               |
| 0.091519172 | Metabolism               |
| 0.076905237 | Metabolism               |
| 0.453970191 | Metabolism               |
| 0.09598923  | Proliferation/Metastasis |
| 0.082285368 | Metabolism               |
| 0.011274307 | Metabolism               |
| 0.008601965 | Metabolism               |
| 0.00017654  | Metabolism               |
| 1.42E-05    | Metabolism               |
| 0.00424258  | Metabolism               |
| 0.00018443  | Proliferation/Metastasis |
| 0.1003161   | Metabolism               |
| 0.02650934  | Metabolism               |
| 0.146052546 | Proliferation/Metastasis |
| 0.020381467 | Metabolism               |
| 0.496451164 | Metabolism               |
| 0.364430581 | Metabolism               |
| 0.783430057 | Metabolism               |
| 0.01061976  | Metabolism               |
| 0.013454289 | Metabolism               |
| 0.379070716 | Metabolism               |
| 0.031740466 | Metabolism               |
| 0.008893379 | TME                      |
| 0.001623756 | TME                      |
| 0.00023001  | TME                      |



|             |                          |
|-------------|--------------------------|
| 0.000233659 | TME                      |
| 0.001043967 | TME                      |
| 0.014342622 | Metabolism               |
| 0.215415113 | Metabolism               |
| 0.387120328 | Proliferation/Metastasis |
| 0.261112196 | Metabolism               |
| 1.51E-07    | Proliferation/Metastasis |
| 0.223767962 | Metabolism               |
| 0.002043504 | TME                      |
| 0.564165191 | Metabolism               |
| 0.229760638 | Metabolism               |
| 0.077269524 | Metabolism               |
| 0.000945668 | Metabolism               |
| 0.003057212 | TME                      |
| 0.125156118 | TME                      |
| 0.419933694 | Proliferation/Metastasis |
| 0.784327787 | Metabolism               |
| 0.903549681 | Proliferation/Metastasis |
| 0.635814481 | Proliferation/Metastasis |
| 0.793603589 | TME                      |
| 0.726998121 | TME                      |
| 0.800639757 | TME                      |
| 0.975697552 | TME                      |
| 0.148031214 | Metabolism               |
| 0.296954587 | Proliferation/Metastasis |
| 0.527215419 | Metabolism               |
| 0.146070726 | Metabolism               |
| 0.049765239 | Proliferation/Metastasis |
| 0.263032221 | Proliferation/Metastasis |
| 0.269648052 | Metabolism               |
| 0.097491159 | Metabolism               |
| 0.737444329 | Metabolism               |
| 0.049518178 | Metabolism               |
| 0.765407079 | TME                      |
| 0.524835938 | TME                      |
| 0.836441229 | TME                      |
| 0.902863538 | TME                      |
| 0.686448616 | TME                      |
| 0.005210064 | Metabolism               |
| 0.538883098 | Metabolism               |
| 0.667354747 | Metabolism               |
| 0.662107717 | Metabolism               |
| 0.048794285 | Metabolism               |

|             |                          |
|-------------|--------------------------|
| 0.764256937 | TME                      |
| 0.81436939  | TME                      |
| 0.432371153 | TME                      |
| 0.081343526 | TME                      |
| 0.811037822 | TME                      |
| 0.896071943 | TME                      |
| 0.871653657 | TME                      |
| 0.682236992 | TME                      |
| 0.972940151 | TME                      |
| 0.033233413 | Proliferation/Metastasis |
| 0.595811838 | Proliferation/Metastasis |
| 0.982196032 | Metabolism               |
| 0.683393669 | Metabolism               |
| 0.856991327 | TME                      |
| 0.669170819 | Metabolism               |
| 0.381184189 | Metabolism               |
| 0.916496975 | TME                      |
| 0.11056921  | Proliferation/Metastasis |
| 0.12396474  | Proliferation/Metastasis |
| 0.622374015 | TME                      |
| 0.079643774 | Metabolism               |
| 0.936852432 | Metabolism               |
| 0.117549632 | Proliferation/Metastasis |
| 0.797449279 | Proliferation/Metastasis |
| 0.745949717 | TME                      |
| 0.516642481 | TME                      |
| 0.310886226 | TME                      |
| 0.928547383 | TME                      |
| 0.492110823 | Proliferation/Metastasis |
| 0.740825946 | TME                      |
| 0.812243352 | TME                      |
| 0.224629569 | Metabolism               |
| 0.72003937  | TME                      |
| 0.538818638 | TME                      |
| 0.585475921 | TME                      |
| 0.624617893 | TME                      |
| 0.131674448 | Metabolism               |
| 0.508558312 | Metabolism               |
| 0.515983326 | Metabolism               |
| 0.922954367 | TME                      |
| 0.233918925 | Metabolism               |
| 0.360350679 | TME                      |
| 0.71235579  | TME                      |

|             |                          |
|-------------|--------------------------|
| 0.644464898 | TME                      |
| 0.411676091 | TME                      |
| 0.348124781 | TME                      |
| 0.153399189 | Metabolism               |
| 0.162510247 | Proliferation/Metastasis |
| 0.604897383 | Metabolism               |
| 0.18064609  | Proliferation/Metastasis |
| 0.909519629 | Metabolism               |
| 0.623727885 | Metabolism               |
| 0.434999578 | Metabolism               |
| 0.03456974  | Metabolism               |
| 0.216128501 | Metabolism               |
| 0.283847954 | Metabolism               |
| 0.239801587 | Metabolism               |
| 0.234299042 | Metabolism               |
| 0.380313724 | Metabolism               |
| 0.131439103 | Metabolism               |
| 0.667043085 | Metabolism               |
| 0.963187996 | Metabolism               |
| 0.748473589 | Metabolism               |
| 0.374867887 | Metabolism               |
| 0.752627848 | TME                      |
| 0.098165165 | Proliferation/Metastasis |
| 0.001319543 | Metabolism               |
| 0.386455777 | Proliferation/Metastasis |
| 0.21637422  | TME                      |
| 0.357535872 | Proliferation/Metastasis |
| 0.316538778 | Proliferation/Metastasis |
| 0.168025066 | TME                      |
| 0.173294188 | TME                      |
| 0.328678116 | Metabolism               |
| 0.451590722 | Metabolism               |
| 0.097432055 | Proliferation/Metastasis |
| 0.16399711  | Proliferation/Metastasis |
| 0.044637805 | Proliferation/Metastasis |
| 0.080456479 | Metabolism               |
| 0.475678886 | Metabolism               |
| 0.25759807  | Metabolism               |
| 0.109160921 | Proliferation/Metastasis |
| 0.778863708 | TME                      |
| 0.794204456 | TME                      |
| 0.14873989  | Metabolism               |
| 0.371190774 | Proliferation/Metastasis |

|             |                          |
|-------------|--------------------------|
| 0.385281937 | Metabolism               |
| 0.304290456 | TME                      |
| 0.579673182 | TME                      |
| 0.859977336 | TME                      |
| 0.56412061  | TME                      |
| 0.40074871  | Metabolism               |
| 0.155051403 | TME                      |
| 0.558625017 | Proliferation/Metastasis |
| 0.582007357 | TME                      |
| 0.494201659 | Proliferation/Metastasis |
| 0.471598904 | Proliferation/Metastasis |
| 4.02E-05    | Metabolism               |
| 0.082597351 | Proliferation/Metastasis |
| 0.972212548 | TME                      |
| 0.8464329   | Metabolism               |
| 0.067170884 | TME                      |
| 0.27726544  | TME                      |
| 0.910121673 | TME                      |
| 0.791329335 | TME                      |
| 0.127014768 | TME                      |
| 0.346421556 | TME                      |
| 0.616779703 | Metabolism               |
| 0.732911489 | TME                      |
| 0.088238492 | Metabolism               |
| 0.505134438 | Metabolism               |
| 0.254115529 | Proliferation/Metastasis |
| 0.050920178 | Proliferation/Metastasis |
| 0.206860096 | Metabolism               |
| 0.298243237 | Metabolism               |
| 0.191460767 | Metabolism               |
| 0.750049367 | Metabolism               |
| 0.122395975 | Proliferation/Metastasis |
| 0.25004153  | Proliferation/Metastasis |
| 0.674264482 | Metabolism               |
| 0.231966029 | Metabolism               |
| 0.556797369 | Metabolism               |
| 0.760144905 | TME                      |
| 0.022322893 | Metabolism               |
| 0.843714542 | Metabolism               |
| 0.506328815 | Metabolism               |
| 0.209395648 | Metabolism               |
| 0.580592961 | Proliferation/Metastasis |
| 0.069853696 | Metabolism               |

|             |                          |
|-------------|--------------------------|
| 0.080181348 | Metabolism               |
| 0.774958311 | Metabolism               |
| 0.500420864 | Metabolism               |
| 0.023506706 | Metabolism               |
| 0.555501851 | Metabolism               |
| 0.419545035 | Proliferation/Metastasis |
| 0.002768056 | Metabolism               |
| 0.672311142 | Metabolism               |
| 0.076332031 | Proliferation/Metastasis |
| 0.414493169 | Metabolism               |
| 0.861433094 | Metabolism               |
| 0.057232539 | Metabolism               |
| 0.464979464 | Metabolism               |
| 0.273589026 | Metabolism               |
| 0.114690396 | Metabolism               |
| 0.211766924 | Metabolism               |
| 0.533508132 | Metabolism               |
| 0.36271856  | TME                      |
| 0.701678493 | TME                      |
| 0.394766915 | TME                      |
| 0.328056483 | TME                      |
| 0.964810303 | TME                      |
| 0.335934334 | Metabolism               |
| 0.639228298 | Metabolism               |
| 0.629796981 | Proliferation/Metastasis |
| 0.40783921  | Metabolism               |
| 0.285313768 | Proliferation/Metastasis |
| 0.2140993   | Metabolism               |
| 0.593631884 | TME                      |
| 0.00403753  | Metabolism               |
| 0.311284224 | Metabolism               |
| 0.547044188 | Metabolism               |
| 0.957060504 | Metabolism               |
| 0.477743593 | TME                      |
| 0.458676092 | TME                      |
| 0.138980612 | Proliferation/Metastasis |
| 0.890095555 | Metabolism               |
| 0.54005587  | Proliferation/Metastasis |
| 0.094016657 | Proliferation/Metastasis |
| 0.446626646 | TME                      |
| 0.038784108 | TME                      |
| 0.015963491 | TME                      |
| 0.038415873 | TME                      |

|             |                          |
|-------------|--------------------------|
| 0.437107787 | Metabolism               |
| 0.025165673 | Proliferation/Metastasis |
| 0.659178462 | Metabolism               |
| 0.004177223 | Metabolism               |
| 0.244896846 | Proliferation/Metastasis |
| 0.175032101 | Proliferation/Metastasis |
| 0.066192755 | Metabolism               |
| 0.382757983 | Metabolism               |
| 0.619212428 | Metabolism               |
| 0.497800487 | Metabolism               |
| 0.182766097 | TME                      |
| 0.065799749 | TME                      |
| 0.001671599 | TME                      |
| 0.075553388 | TME                      |
| 0.0170726   | TME                      |
| 0.171699199 | Metabolism               |
| 0.014765971 | Metabolism               |
| 0.447802387 | Metabolism               |
| 0.574170821 | Metabolism               |
| 0.15984476  | Metabolism               |
| 0.0106168   | TME                      |
| 0.218035442 | TME                      |
| 0.04168531  | TME                      |
| 0.445632617 | TME                      |
| 0.099475057 | TME                      |
| 0.031508682 | TME                      |
| 0.03513284  | TME                      |
| 0.153792295 | TME                      |
| 0.017936078 | TME                      |
| 0.45926712  | Proliferation/Metastasis |
| 0.480174373 | Proliferation/Metastasis |
| 0.190519822 | Metabolism               |
| 0.128218219 | Metabolism               |
| 0.359592918 | TME                      |
| 0.862953333 | Metabolism               |
| 0.033199327 | Metabolism               |
| 0.013184837 | TME                      |
| 0.594260276 | Proliferation/Metastasis |
| 0.096032228 | Proliferation/Metastasis |
| 0.602029799 | TME                      |
| 0.724109401 | Metabolism               |
| 0.941270732 | Metabolism               |
| 0.273859841 | Proliferation/Metastasis |

|             |                          |
|-------------|--------------------------|
| 0.176193519 | Proliferation/Metastasis |
| 0.02162616  | TME                      |
| 0.001739759 | TME                      |
| 0.039463301 | TME                      |
| 0.028435594 | TME                      |
| 0.143073937 | Proliferation/Metastasis |
| 0.132779144 | TME                      |
| 0.005491082 | TME                      |
| 0.41689821  | Metabolism               |
| 0.013962207 | TME                      |
| 0.003088975 | TME                      |
| 0.030798631 | TME                      |
| 0.541301252 | TME                      |
| 0.160382556 | Metabolism               |
| 0.110586981 | Metabolism               |
| 0.105886372 | Metabolism               |
| 0.065572979 | TME                      |
| 0.472699612 | Metabolism               |
| 0.063150272 | TME                      |
| 0.799528613 | TME                      |
| 0.010707539 | TME                      |
| 0.005185556 | TME                      |
| 0.050255163 | TME                      |
| 0.014816715 | Metabolism               |
| 0.471961953 | Proliferation/Metastasis |
| 0.376178298 | Metabolism               |
| 0.370580959 | Proliferation/Metastasis |
| 0.11967854  | Metabolism               |
| 0.641431821 | Metabolism               |
| 0.155319187 | Metabolism               |
| 0.039469408 | Metabolism               |
| 0.414625838 | Metabolism               |
| 0.917726736 | Metabolism               |
| 0.169880206 | Metabolism               |
| 0.413286044 | Metabolism               |
| 0.002551651 | Metabolism               |
| 0.750701772 | Metabolism               |
| 0.046713495 | Metabolism               |
| 0.733632687 | Metabolism               |
| 0.029001489 | Metabolism               |
| 0.164061029 | Metabolism               |
| 0.004238946 | TME                      |
| 0.881501674 | Proliferation/Metastasis |

|             |                          |
|-------------|--------------------------|
| 0.99236549  | Metabolism               |
| 0.055243162 | Proliferation/Metastasis |
| 0.144646193 | TME                      |
| 0.079668605 | Proliferation/Metastasis |
| 0.008557307 | Proliferation/Metastasis |
| 0.000750084 | TME                      |
| 0.01122431  | TME                      |
| 0.680124911 | Metabolism               |
| 0.022906972 | Metabolism               |
| 0.158541029 | Proliferation/Metastasis |
| 0.046180789 | Proliferation/Metastasis |
| 0.004985026 | Proliferation/Metastasis |
| 0.841319131 | Metabolism               |
| 0.207041883 | Metabolism               |
| 0.208998124 | Metabolism               |
| 0.046385801 | Proliferation/Metastasis |
| 0.003932694 | TME                      |
| 0.022533845 | TME                      |
| 0.823890597 | Metabolism               |
| 0.131262416 | Proliferation/Metastasis |
| 0.149377904 | Metabolism               |
| 0.157861507 | TME                      |
| 0.068284298 | TME                      |
| 0.577278872 | TME                      |
| 0.01566084  | TME                      |
| 0.919263492 | Metabolism               |
| 0.06715954  | TME                      |
| 0.680208427 | Proliferation/Metastasis |
| 0.003370071 | TME                      |
| 0.91813788  | Proliferation/Metastasis |
| 0.031362523 | Proliferation/Metastasis |
| 0.305889658 | Metabolism               |
| 0.213950392 | Proliferation/Metastasis |
| 0.029474579 | TME                      |
| 0.747926554 | Metabolism               |
| 0.824893448 | TME                      |
| 0.196958287 | TME                      |
| 0.444408516 | TME                      |
| 0.023804564 | TME                      |
| 0.008134424 | TME                      |
| 0.104448258 | TME                      |
| 0.01238657  | Metabolism               |
| 0.001353121 | TME                      |



|             |                          |
|-------------|--------------------------|
| 0.075822713 | Metabolism               |
| 0.435717698 | Metabolism               |
| 0.197120752 | Proliferation/Metastasis |
| 0.271873386 | Proliferation/Metastasis |
| 0.208136706 | Metabolism               |
| 0.251893656 | Metabolism               |
| 0.482944651 | Metabolism               |
| 0.16201436  | Metabolism               |
| 0.011914461 | Proliferation/Metastasis |
| 0.905907671 | Proliferation/Metastasis |
| 0.260983258 | Metabolism               |
| 0.135133272 | Metabolism               |
| 0.192077514 | Metabolism               |
| 0.008197777 | TME                      |
| 0.23904553  | Metabolism               |
| 0.002355811 | Metabolism               |
| 0.842122716 | Metabolism               |
| 0.997564366 | Metabolism               |
| 0.41098448  | Proliferation/Metastasis |
| 0.188686159 | Metabolism               |
| 0.558596454 | Metabolism               |
| 0.20957722  | Metabolism               |
| 0.16155481  | Metabolism               |
| 0.102175203 | Metabolism               |
| 0.532541549 | Metabolism               |
| 0.721412983 | Proliferation/Metastasis |
| 0.619471386 | Metabolism               |
| 0.381219991 | Metabolism               |
| 0.947691636 | Proliferation/Metastasis |
| 0.394898002 | Metabolism               |
| 0.005247833 | Metabolism               |
| 0.236071758 | Metabolism               |
| 0.222348424 | Metabolism               |
| 0.903666779 | Metabolism               |
| 0.393425711 | Metabolism               |
| 0.176987528 | Metabolism               |
| 0.65778826  | Metabolism               |
| 0.012947526 | TME                      |
| 0.033802137 | TME                      |
| 0.006302693 | TME                      |
| 0.039271187 | TME                      |
| 0.052829889 | TME                      |
| 0.952210613 | Metabolism               |

|             |                          |
|-------------|--------------------------|
| 0.932124297 | Metabolism               |
| 0.135518114 | Proliferation/Metastasis |
| 0.468001269 | Metabolism               |
| 0.011060788 | Proliferation/Metastasis |
| 0.731541964 | Metabolism               |
| 0.445929824 | TME                      |
| 0.923370415 | Metabolism               |
| 0.29745915  | Metabolism               |
| 6.51E-05    | Metabolism               |
| 0.51843143  | Metabolism               |
| 0.016032445 | TME                      |
| 0.246026204 | TME                      |
| 0.281451613 | Proliferation/Metastasis |
| 0.793659753 | Metabolism               |
| 0.303904101 | Proliferation/Metastasis |
| 0.872141541 | Proliferation/Metastasis |
| 0.245361948 | TME                      |
| 0.954378458 | TME                      |
| 0.031547186 | TME                      |
| 0.350921322 | TME                      |
| 0.356086152 | Metabolism               |
| 0.338911492 | Proliferation/Metastasis |
| 0.662812202 | Metabolism               |
| 0.201817996 | Metabolism               |
| 0.046349065 | Proliferation/Metastasis |
| 0.277468207 | Proliferation/Metastasis |
| 0.883842627 | Metabolism               |
| 0.009725052 | Metabolism               |
| 0.59633491  | Metabolism               |
| 0.000572809 | Metabolism               |
| 0.390188035 | TME                      |
| 0.70552654  | TME                      |
| 0.249886524 | TME                      |
| 0.489542177 | TME                      |
| 0.371235637 | TME                      |
| 0.456753638 | Metabolism               |
| 0.047029931 | Metabolism               |
| 0.581925465 | Metabolism               |
| 0.161315114 | Metabolism               |
| 0.027965885 | Metabolism               |
| 0.91846177  | TME                      |
| 0.410053845 | TME                      |
| 0.148224761 | TME                      |

|             |                          |
|-------------|--------------------------|
| 0.027300111 | TME                      |
| 0.143568944 | TME                      |
| 0.073377352 | TME                      |
| 0.075599715 | TME                      |
| 0.373842751 | TME                      |
| 0.251434151 | TME                      |
| 0.017986834 | Proliferation/Metastasis |
| 0.187312459 | Proliferation/Metastasis |
| 0.273913992 | Metabolism               |
| 0.965080335 | Metabolism               |
| 0.010620698 | TME                      |
| 0.478575064 | Metabolism               |
| 0.906266453 | Metabolism               |
| 0.36574691  | TME                      |
| 0.00126163  | Proliferation/Metastasis |
| 0.028823157 | Proliferation/Metastasis |
| 0.402778609 | TME                      |
| 0.000362316 | Metabolism               |
| 0.621984273 | Metabolism               |
| 0.024037972 | Proliferation/Metastasis |
| 0.015299206 | Proliferation/Metastasis |
| 0.046243597 | TME                      |
| 0.2019375   | TME                      |
| 0.01768404  | TME                      |
| 0.098349887 | TME                      |
| 0.722967129 | Proliferation/Metastasis |
| 0.296880702 | TME                      |
| 0.252350147 | TME                      |
| 0.497038456 | Metabolism               |
| 0.890168179 | TME                      |
| 0.65476872  | TME                      |
| 0.106061673 | TME                      |
| 0.414233655 | TME                      |
| 0.277628896 | Metabolism               |
| 0.605591401 | Metabolism               |
| 0.456985463 | Metabolism               |
| 0.961225394 | TME                      |
| 0.657188639 | Metabolism               |
| 0.129103019 | TME                      |
| 0.500584155 | TME                      |
| 0.203836554 | TME                      |
| 0.317656399 | TME                      |
| 0.046531572 | TME                      |

|             |                          |
|-------------|--------------------------|
| 0.054581657 | Metabolism               |
| 0.016179665 | Proliferation/Metastasis |
| 0.885703332 | Metabolism               |
| 0.289370551 | Proliferation/Metastasis |
| 0.292278833 | Metabolism               |
| 0.743089153 | Metabolism               |
| 0.482471999 | Metabolism               |
| 0.684615441 | Metabolism               |
| 0.604080223 | Metabolism               |
| 0.769889357 | Metabolism               |
| 0.00904823  | Metabolism               |
| 0.488702147 | Metabolism               |
| 0.435695843 | Metabolism               |
| 0.421827238 | Metabolism               |
| 0.187951803 | Metabolism               |
| 0.012194412 | Metabolism               |
| 0.951674355 | Metabolism               |
| 0.955465193 | Metabolism               |
| 0.250173328 | TME                      |
| 0.643321176 | Proliferation/Metastasis |
| 0.124808747 | Metabolism               |
| 0.908277635 | Proliferation/Metastasis |
| 0.034262716 | TME                      |
| 0.848764725 | Proliferation/Metastasis |
| 0.963318261 | Proliferation/Metastasis |
| 0.73050129  | TME                      |
| 0.435524158 | TME                      |
| 0.370447753 | Metabolism               |
| 0.558781201 | Metabolism               |
| 0.231009623 | Proliferation/Metastasis |
| 0.315296821 | Proliferation/Metastasis |
| 0.443485373 | Proliferation/Metastasis |
| 0.033936085 | Metabolism               |
| 0.775383086 | Metabolism               |
| 0.629085305 | Metabolism               |
| 0.000384842 | Proliferation/Metastasis |
| 0.364908118 | TME                      |
| 0.112164215 | TME                      |
| 0.002048604 | Metabolism               |
| 0.869837908 | Proliferation/Metastasis |
| 0.204263923 | Metabolism               |
| 0.082040826 | TME                      |
| 0.076721367 | TME                      |

|             |                          |
|-------------|--------------------------|
| 0.036248423 | TME                      |
| 0.64663416  | TME                      |
| 0.019033337 | Metabolism               |
| 0.018368283 | TME                      |
| 0.140631751 | Proliferation/Metastasis |
| 0.210722567 | TME                      |
| 0.017376779 | Proliferation/Metastasis |
| 0.252603968 | Proliferation/Metastasis |
| 0.150042399 | Metabolism               |
| 0.002643373 | Proliferation/Metastasis |
| 0.338773112 | TME                      |
| 0.115417111 | Metabolism               |
| 0.744043293 | TME                      |
| 0.02737255  | TME                      |
| 0.208607097 | TME                      |
| 0.412077656 | TME                      |
| 0.921336848 | TME                      |
| 0.017906279 | TME                      |
| 0.820770931 | Metabolism               |
| 0.243615971 | TME                      |
| 0.038046587 | Metabolism               |
| 0.000550412 | Metabolism               |
| 0.835829514 | Proliferation/Metastasis |
| 0.322260959 | Proliferation/Metastasis |
| 0.001119352 | Metabolism               |
| 0.023888264 | Metabolism               |
| 0.049809686 | Metabolism               |
| 0.006884751 | Metabolism               |
| 0.473655381 | Proliferation/Metastasis |
| 0.014226088 | Proliferation/Metastasis |
| 0.042742705 | Metabolism               |
| 0.000285102 | Metabolism               |
| 0.493917414 | Metabolism               |
| 0.536820942 | TME                      |
| 0.181610646 | Metabolism               |
| 0.380381124 | Metabolism               |
| 0.417822321 | Metabolism               |
| 0.302925804 | Metabolism               |
| 0.840448394 | Proliferation/Metastasis |
| 0.052940353 | Metabolism               |
| 2.64E-05    | Metabolism               |
| 0.701125967 | Metabolism               |
| 0.008496008 | Metabolism               |

|             |                          |
|-------------|--------------------------|
| 0.032421519 | Metabolism               |
| 0.956688974 | Metabolism               |
| 0.010990698 | Proliferation/Metastasis |
| 0.004092542 | Metabolism               |
| 0.8153173   | Metabolism               |
| 0.740661338 | Proliferation/Metastasis |
| 0.908302115 | Metabolism               |
| 0.100591091 | Metabolism               |
| 0.765489158 | Metabolism               |
| 0.143946013 | Metabolism               |
| 0.786671872 | Metabolism               |
| 0.003194087 | Metabolism               |
| 0.18921549  | Metabolism               |
| 0.85755684  | Metabolism               |
| 0.138930996 | TME                      |
| 0.244248081 | TME                      |
| 0.483575468 | TME                      |
| 0.131665993 | TME                      |
| 0.489709886 | TME                      |
| 0.342045974 | Metabolism               |
| 0.123385001 | Metabolism               |
| 0.001753902 | Proliferation/Metastasis |
| 0.784543193 | Metabolism               |
| 0.186225791 | Proliferation/Metastasis |
| 0.572714631 | Metabolism               |
| 0.104369447 | TME                      |
| 0.091106057 | Metabolism               |
| 0.683200692 | Metabolism               |
| 0.227957306 | Metabolism               |
| 0.457271213 | Metabolism               |
| 0.712445007 | TME                      |
| 0.769562402 | TME                      |
| 0.929527693 | Proliferation/Metastasis |
| 0.297291733 | Metabolism               |
| 4.23E-05    | Proliferation/Metastasis |
| 0.019803898 | Proliferation/Metastasis |
| 1.92E-06    | TME                      |
| 1.38E-09    | TME                      |
| 5.41E-14    | TME                      |
| 4.45E-13    | TME                      |
| 2.14E-13    | Metabolism               |
| 7.95E-11    | Proliferation/Metastasis |
| 6.50E-09    | Metabolism               |

|             |                          |
|-------------|--------------------------|
| 2.51E-08    | Metabolism               |
| 0.720690444 | Proliferation/Metastasis |
| 6.08E-29    | Proliferation/Metastasis |
| 0.896043836 | Metabolism               |
| 0.114653259 | Metabolism               |
| 0.002271542 | Metabolism               |
| 7.15E-17    | Metabolism               |
| 0.000852905 | TME                      |
| 2.96E-20    | TME                      |
| 4.81E-07    | TME                      |
| 5.33E-05    | TME                      |
| 7.64E-09    | TME                      |
| 0.000855032 | Metabolism               |
| 0.017896797 | Metabolism               |
| 6.34E-10    | Metabolism               |
| 6.79E-19    | Metabolism               |
| 0.019257622 | Metabolism               |
| 2.03E-27    | TME                      |
| 1.03E-07    | TME                      |
| 5.27E-17    | TME                      |
| 0.007428742 | TME                      |
| 4.62E-14    | TME                      |
| 4.39E-10    | TME                      |
| 4.05E-11    | TME                      |
| 1.07E-11    | TME                      |
| 3.48E-10    | TME                      |
| 0.014595533 | Proliferation/Metastasis |
| 2.69E-09    | Proliferation/Metastasis |
| 0.031157871 | Metabolism               |
| 4.56E-07    | Metabolism               |
| 1.57E-08    | TME                      |
| 0.070604598 | Metabolism               |
| 0.011881763 | Metabolism               |
| 5.75E-24    | TME                      |
| 0.241411961 | Proliferation/Metastasis |
| 0.000732416 | Proliferation/Metastasis |
| 0.000405746 | TME                      |
| 3.93E-15    | Metabolism               |
| 0.219112693 | Metabolism               |
| 0.052604537 | Proliferation/Metastasis |
| 6.40E-31    | Proliferation/Metastasis |
| 0.060371675 | TME                      |
| 7.00E-24    | TME                      |

|             |                          |
|-------------|--------------------------|
| 8.19E-07    | TME                      |
| 7.68E-15    | TME                      |
| 0.023631216 | Proliferation/Metastasis |
| 2.58E-22    | TME                      |
| 5.87E-19    | TME                      |
| 0.006005507 | Metabolism               |
| 2.27E-22    | TME                      |
| 2.10E-17    | TME                      |
| 3.01E-08    | TME                      |
| 0.185775254 | TME                      |
| 4.87E-17    | Metabolism               |
| 1.22E-27    | Metabolism               |
| 0.342356953 | Metabolism               |
| 4.02E-24    | TME                      |
| 0.000139036 | Metabolism               |
| 1.91E-05    | TME                      |
| 0.000401482 | TME                      |
| 2.46E-12    | TME                      |
| 9.44E-09    | TME                      |
| 0.000105022 | TME                      |
| 0.860601787 | Metabolism               |
| 0.055356507 | Proliferation/Metastasis |
| 2.43E-09    | Metabolism               |
| 8.91E-21    | Proliferation/Metastasis |
| 0.061122647 | Metabolism               |
| 1.68E-05    | Metabolism               |
| 0.000120288 | Metabolism               |
| 4.17E-05    | Metabolism               |
| 0.031620044 | Metabolism               |
| 1.22E-39    | Metabolism               |
| 0.000157725 | Metabolism               |
| 1.22E-07    | Metabolism               |
| 1.40E-06    | Metabolism               |
| 7.54E-10    | Metabolism               |
| 0.006352843 | Metabolism               |
| 0.001028301 | Metabolism               |
| 7.56E-13    | Metabolism               |
| 4.73E-06    | Metabolism               |
| 1.01E-25    | TME                      |
| 1.79E-11    | Proliferation/Metastasis |
| 0.063368271 | Metabolism               |
| 8.02E-26    | Proliferation/Metastasis |
| 3.95E-11    | TME                      |



|             |                          |
|-------------|--------------------------|
| 3.53E-29    | Proliferation/Metastasis |
| 1.96E-28    | Proliferation/Metastasis |
| 1.84E-15    | TME                      |
| 4.61E-28    | TME                      |
| 2.70E-07    | Metabolism               |
| 1.26E-12    | Metabolism               |
| 1.33E-12    | Proliferation/Metastasis |
| 0.036072436 | Proliferation/Metastasis |
| 1.12E-24    | Proliferation/Metastasis |
| 8.10E-12    | Metabolism               |
| 2.07E-15    | Metabolism               |
| 9.12E-08    | Metabolism               |
| 6.05E-07    | Proliferation/Metastasis |
| 4.60E-16    | TME                      |
| 4.80E-24    | TME                      |
| 0.391456129 | Metabolism               |
| 1.91E-18    | Proliferation/Metastasis |
| 4.14E-10    | Metabolism               |
| 2.11E-07    | TME                      |
| 5.18E-10    | TME                      |
| 1.61E-31    | TME                      |
| 5.60E-27    | TME                      |
| 1.90E-14    | Metabolism               |
| 6.57E-06    | TME                      |
| 0.002255277 | Proliferation/Metastasis |
| 2.16E-25    | TME                      |
| 0.959389104 | Proliferation/Metastasis |
| 1.91E-05    | Proliferation/Metastasis |
| 0.040117471 | Metabolism               |
| 0.028035508 | Proliferation/Metastasis |
| 1.24E-17    | TME                      |
| 0.906198075 | Metabolism               |
| 0.000145705 | TME                      |
| 0.019143454 | TME                      |
| 0.44873034  | TME                      |
| 6.98E-15    | TME                      |
| 0.040103306 | TME                      |
| 5.40E-05    | TME                      |
| 2.68E-17    | Metabolism               |
| 1.42E-30    | TME                      |
| 2.71E-06    | Metabolism               |
| 0.024614638 | Metabolism               |
| 1.98E-24    | Proliferation/Metastasis |

|             |                          |
|-------------|--------------------------|
| 0.000128233 | Proliferation/Metastasis |
| 0.957265493 | Metabolism               |
| 0.098505882 | Metabolism               |
| 1.68E-08    | Metabolism               |
| 0.265140298 | Metabolism               |
| 1.58E-10    | Proliferation/Metastasis |
| 0.620746655 | Proliferation/Metastasis |
| 3.03E-08    | Metabolism               |
| 1.01E-18    | Metabolism               |
| 0.643805337 | Metabolism               |
| 1.82E-28    | TME                      |
| 0.002206123 | Metabolism               |
| 0.058888175 | Metabolism               |
| 8.54E-10    | Metabolism               |
| 0.053137873 | Metabolism               |
| 0.000227744 | Proliferation/Metastasis |
| 4.16E-07    | Metabolism               |
| 0.927313474 | Metabolism               |
| 3.36E-24    | Metabolism               |
| 2.80E-06    | Metabolism               |
| 1.05E-06    | Metabolism               |
| 0.007365763 | Metabolism               |
| 0.87768765  | Proliferation/Metastasis |
| 1.05E-11    | Metabolism               |
| 1.47E-12    | Metabolism               |
| 0.867183238 | Proliferation/Metastasis |
| 0.386080538 | Metabolism               |
| 0.007343373 | Metabolism               |
| 0.237681648 | Metabolism               |
| 2.62E-08    | Metabolism               |
| 0.286918076 | Metabolism               |
| 3.44E-12    | Metabolism               |
| 5.40E-05    | Metabolism               |
| 0.000361113 | Metabolism               |
| 4.25E-15    | TME                      |
| 3.16E-19    | TME                      |
| 2.43E-14    | TME                      |
| 3.67E-08    | TME                      |
| 0.000785977 | TME                      |
| 3.18E-05    | Metabolism               |
| 0.058356893 | Metabolism               |
| 0.000589309 | Proliferation/Metastasis |
| 0.004003488 | Metabolism               |

|             |                          |
|-------------|--------------------------|
| 7.22E-27    | Proliferation/Metastasis |
| 0.325240945 | Metabolism               |
| 3.60E-12    | TME                      |
| 3.94E-08    | Metabolism               |
| 0.136923899 | Metabolism               |
| 0.004633209 | Metabolism               |
| 8.71E-24    | Metabolism               |
| 4.82E-13    | TME                      |
| 4.58E-08    | TME                      |
| 2.68E-05    | Proliferation/Metastasis |
| 0.002556203 | Metabolism               |
| 0.200346278 | Proliferation/Metastasis |
| 3.42E-05    | Proliferation/Metastasis |
| 0.292075873 | TME                      |
| 0.077976023 | TME                      |
| 0.753704651 | TME                      |
| 0.284122113 | TME                      |
| 4.26E-07    | Metabolism               |
| 0.221484022 | Proliferation/Metastasis |
| 1.33E-05    | Metabolism               |
| 0.965310765 | Metabolism               |
| 0.119339911 | Proliferation/Metastasis |
| 0.208709701 | Proliferation/Metastasis |
| 0.054660712 | Metabolism               |
| 0.782762714 | Metabolism               |
| 6.10E-08    | Metabolism               |
| 3.09E-08    | Metabolism               |
| 0.147463997 | TME                      |
| 0.303566084 | TME                      |
| 0.683256398 | TME                      |
| 0.405626572 | TME                      |
| 0.0007819   | TME                      |
| 0.003755042 | Metabolism               |
| 0.700849079 | Metabolism               |
| 0.363959475 | Metabolism               |
| 0.222457755 | Metabolism               |
| 0.701277869 | Metabolism               |
| 0.068644732 | TME                      |
| 0.257739186 | TME                      |
| 0.312665532 | TME                      |
| 0.283873296 | TME                      |
| 0.574760529 | TME                      |
| 0.742466505 | TME                      |

|             |                          |
|-------------|--------------------------|
| 0.74473591  | TME                      |
| 0.175254937 | TME                      |
| 0.522119866 | TME                      |
| 0.678175115 | Proliferation/Metastasis |
| 5.87E-07    | Proliferation/Metastasis |
| 0.326562119 | Metabolism               |
| 0.175230716 | Metabolism               |
| 0.084298938 | TME                      |
| 0.097987857 | Metabolism               |
| 5.88E-17    | Metabolism               |
| 0.355208964 | TME                      |
| 1.79E-09    | Proliferation/Metastasis |
| 9.37E-08    | Proliferation/Metastasis |
| 0.045629897 | TME                      |
| 1.35E-06    | Metabolism               |
| 0.240865495 | Metabolism               |
| 0.040515493 | Proliferation/Metastasis |
| 0.409086166 | Proliferation/Metastasis |
| 0.023767533 | TME                      |
| 0.735351249 | TME                      |
| 0.273447333 | TME                      |
| 0.909828029 | TME                      |
| 6.87E-05    | Proliferation/Metastasis |
| 0.798930007 | TME                      |
| 0.797349913 | TME                      |
| 1.09E-10    | Metabolism               |
| 0.976313951 | TME                      |
| 0.502846868 | TME                      |
| 0.271872088 | TME                      |
| 0.129460548 | TME                      |
| 2.27E-06    | Metabolism               |
| 1.79E-05    | Metabolism               |
| 0.028799532 | Metabolism               |
| 0.975431521 | TME                      |
| 0.558988653 | Metabolism               |
| 0.821660299 | TME                      |
| 0.449945373 | TME                      |
| 0.759903882 | TME                      |
| 0.051870646 | TME                      |
| 0.832234212 | TME                      |
| 0.09227427  | Metabolism               |
| 0.995450765 | Proliferation/Metastasis |
| 0.977277469 | Metabolism               |

|             |                          |
|-------------|--------------------------|
| 0.289626611 | Proliferation/Metastasis |
| 0.010869847 | Metabolism               |
| 0.022134258 | Metabolism               |
| 0.000349987 | Metabolism               |
| 0.223757466 | Metabolism               |
| 0.014915946 | Metabolism               |
| 0.002019272 | Metabolism               |
| 0.201048607 | Metabolism               |
| 0.441104789 | Metabolism               |
| 0.481761496 | Metabolism               |
| 0.087776799 | Metabolism               |
| 0.016812568 | Metabolism               |
| 0.211630649 | Metabolism               |
| 0.141978365 | Metabolism               |
| 0.029003013 | Metabolism               |
| 0.235675562 | TME                      |
| 0.284848485 | Proliferation/Metastasis |
| 0.430293782 | Metabolism               |
| 0.053369096 | Proliferation/Metastasis |
| 0.916954528 | TME                      |
| 0.626166676 | Proliferation/Metastasis |
| 0.415530847 | Proliferation/Metastasis |
| 0.37271161  | TME                      |
| 0.151962184 | TME                      |
| 1.57E-17    | Metabolism               |
| 0.000126321 | Metabolism               |
| 0.009128751 | Proliferation/Metastasis |
| 0.003064497 | Proliferation/Metastasis |
| 0.026756182 | Proliferation/Metastasis |
| 8.73E-05    | Metabolism               |
| 0.424230653 | Metabolism               |
| 0.023261705 | Metabolism               |
| 0.075208268 | Proliferation/Metastasis |
| 0.248925366 | TME                      |
| 0.645156329 | TME                      |
| 4.98E-11    | Metabolism               |
| 0.000634817 | Proliferation/Metastasis |
| 6.60E-05    | Metabolism               |
| 0.903456042 | TME                      |
| 0.101345322 | TME                      |
| 0.166103206 | TME                      |
| 0.782795434 | TME                      |
| 0.000178634 | Metabolism               |

|             |                          |
|-------------|--------------------------|
| 0.060599635 | TME                      |
| 0.000484787 | Proliferation/Metastasis |
| 0.623468324 | TME                      |
| 9.76E-06    | Proliferation/Metastasis |
| 0.004860579 | Proliferation/Metastasis |
| 6.61E-13    | Metabolism               |
| 0.308296284 | Proliferation/Metastasis |
| 0.955711749 | TME                      |
| 0.310647834 | Metabolism               |
| 0.445510424 | TME                      |
| 0.001059613 | TME                      |
| 0.042604051 | TME                      |
| 0.357280398 | TME                      |
| 0.542757952 | TME                      |
| 0.041437326 | TME                      |
| 0.604968535 | Metabolism               |
| 0.667674699 | TME                      |
| 0.823491817 | Metabolism               |
| 0.002213338 | Metabolism               |
| 0.073968964 | Proliferation/Metastasis |
| 1.19E-07    | Proliferation/Metastasis |
| 0.139637852 | Metabolism               |
| 0.304213589 | Metabolism               |
| 1.74E-15    | Metabolism               |
| 0.001939417 | Metabolism               |
| 0.000515754 | Proliferation/Metastasis |
| 8.42E-12    | Proliferation/Metastasis |
| 0.195540047 | Metabolism               |
| 2.40E-08    | Metabolism               |
| 0.744658606 | Metabolism               |
| 0.137914247 | TME                      |
| 0.045801421 | Metabolism               |
| 0.081914918 | Metabolism               |
| 0.432044543 | Metabolism               |
| 8.23E-07    | Metabolism               |
| 1.38E-06    | Proliferation/Metastasis |
| 0.023324029 | Metabolism               |
| 0.497837343 | Metabolism               |
| 1.56E-10    | Metabolism               |
| 0.005397026 | Metabolism               |
| 7.58E-06    | Metabolism               |
| 0.041904159 | Metabolism               |
| 0.61638953  | Proliferation/Metastasis |

|             |                          |
|-------------|--------------------------|
| 1.99E-05    | Metabolism               |
| 9.37E-16    | Metabolism               |
| 7.93E-09    | Proliferation/Metastasis |
| 0.954557907 | Metabolism               |
| 0.00974186  | Metabolism               |
| 0.065083759 | Metabolism               |
| 0.344040536 | Metabolism               |
| 0.234449631 | Metabolism               |
| 9.57E-06    | Metabolism               |
| 1.04E-07    | Metabolism               |
| 0.031416245 | Metabolism               |
| 0.643720986 | TME                      |
| 0.489739071 | TME                      |
| 0.170036597 | TME                      |
| 0.14860528  | TME                      |
| 0.448631322 | TME                      |
| 0.015819577 | Metabolism               |
| 0.294958754 | Metabolism               |
| 1.36E-09    | Proliferation/Metastasis |
| 1.09E-12    | Metabolism               |
| 0.039611454 | Proliferation/Metastasis |
| 0.104577847 | Metabolism               |
| 0.451086429 | TME                      |
| 0.011723901 | Metabolism               |
| 0.052777375 | Metabolism               |
| 0.305536568 | Metabolism               |
| 0.004841633 | Metabolism               |
| 0.259139865 | TME                      |
| 0.634747985 | TME                      |
| 1.13E-08    | Proliferation/Metastasis |
| 0.000300273 | Metabolism               |
| 7.82E-05    | Proliferation/Metastasis |
| 0.062092834 | Proliferation/Metastasis |
| 0.949648872 | TME                      |
| 0.204449025 | TME                      |
| 0.412290406 | TME                      |
| 0.223097084 | TME                      |
| 0.207788054 | Metabolism               |
| 0.000320215 | Proliferation/Metastasis |
| 9.32E-08    | Metabolism               |
| 0.000392676 | Metabolism               |
| 0.034849898 | Proliferation/Metastasis |
| 0.632014257 | Proliferation/Metastasis |

|             |                          |
|-------------|--------------------------|
| 3.48E-06    | Metabolism               |
| 0.012990077 | Metabolism               |
| 0.067853639 | Metabolism               |
| 1.08E-06    | Metabolism               |
| 0.696845808 | TME                      |
| 0.059801589 | TME                      |
| 0.076187622 | TME                      |
| 0.897394325 | TME                      |
| 0.835184004 | TME                      |
| 0.163559332 | Metabolism               |
| 0.290479314 | Metabolism               |
| 0.37454728  | Metabolism               |
| 0.032336527 | Metabolism               |
| 0.255693079 | Metabolism               |
| 0.454984758 | TME                      |
| 0.466497707 | TME                      |
| 0.812490238 | TME                      |
| 0.132511901 | TME                      |
| 0.62160126  | TME                      |
| 0.707210001 | TME                      |
| 0.968178086 | TME                      |
| 0.060034414 | TME                      |
| 0.044921441 | TME                      |
| 4.26E-15    | Proliferation/Metastasis |
| 0.001331695 | Proliferation/Metastasis |
| 0.003682766 | Metabolism               |
| 4.65E-07    | Metabolism               |
| 0.777993443 | TME                      |
| 0.064744741 | Metabolism               |
| 0.019357643 | Metabolism               |
| 0.277583242 | TME                      |
| 3.24E-14    | Proliferation/Metastasis |
| 1.14E-25    | Proliferation/Metastasis |
| 0.617745917 | TME                      |
| 1.68E-07    | Metabolism               |
| 0.051606994 | Metabolism               |
| 1.23E-23    | Proliferation/Metastasis |
| 0.947759821 | Proliferation/Metastasis |
| 0.257352272 | TME                      |
| 0.637281131 | TME                      |
| 0.807029566 | TME                      |
| 0.505156191 | TME                      |
| 7.09E-07    | Proliferation/Metastasis |



|             |                          |
|-------------|--------------------------|
| 0.024846292 | TME                      |
| 0.346641583 | TME                      |
| 2.67E-13    | Metabolism               |
| 0.48948609  | TME                      |
| 0.935926494 | TME                      |
| 0.306535565 | TME                      |
| 0.272144254 | TME                      |
| 0.000463622 | Metabolism               |
| 0.000409441 | Metabolism               |
| 0.000717372 | Metabolism               |
| 0.363463535 | TME                      |
| 0.258928383 | Metabolism               |
| 0.154592973 | TME                      |
| 0.456494881 | TME                      |
| 0.938005411 | TME                      |
| 0.06759201  | TME                      |
| 0.892909092 | TME                      |
| 0.873801533 | Metabolism               |
| 4.32E-17    | Proliferation/Metastasis |
| 0.369407869 | Metabolism               |
| 0.052076355 | Proliferation/Metastasis |
| 0.032167241 | Metabolism               |
| 0.087360706 | Metabolism               |
| 2.77E-11    | Metabolism               |
| 0.110240896 | Metabolism               |
| 0.562801321 | Metabolism               |
| 0.027113338 | Metabolism               |
| 0.006469324 | Metabolism               |
| 0.124698407 | Metabolism               |
| 0.027906153 | Metabolism               |
| 0.015501519 | Metabolism               |
| 4.58E-07    | Metabolism               |
| 0.039849874 | Metabolism               |
| 0.60445635  | Metabolism               |
| 0.00298206  | Metabolism               |
| 0.004044078 | TME                      |
| 0.144023948 | Proliferation/Metastasis |
| 0.08705919  | Metabolism               |
| 0.829882508 | Proliferation/Metastasis |
| 0.981046873 | TME                      |
| 0.305672953 | Proliferation/Metastasis |
| 0.657743877 | Proliferation/Metastasis |
| 0.462268672 | TME                      |

|             |                          |
|-------------|--------------------------|
| 0.029882164 | TME                      |
| 1.36E-21    | Metabolism               |
| 0.731205581 | Metabolism               |
| 5.80E-15    | Proliferation/Metastasis |
| 5.00E-11    | Proliferation/Metastasis |
| 0.244030121 | Proliferation/Metastasis |
| 4.12E-10    | Metabolism               |
| 0.106618873 | Metabolism               |
| 0.000203308 | Metabolism               |
| 3.93E-05    | Proliferation/Metastasis |
| 0.050765307 | TME                      |
| 0.029496145 | TME                      |
| 0.000525201 | Metabolism               |
| 0.065276171 | Proliferation/Metastasis |
| 0.453534834 | Metabolism               |
| 0.647111945 | TME                      |
| 0.612110229 | TME                      |
| 0.076985231 | TME                      |
| 0.635833748 | TME                      |
| 2.42E-05    | Metabolism               |
| 0.101724755 | TME                      |
| 0.029740448 | Proliferation/Metastasis |
| 0.592014498 | TME                      |
| 0.000202935 | Proliferation/Metastasis |
| 5.64E-13    | Proliferation/Metastasis |
| 1.19E-08    | Metabolism               |
| 3.46E-25    | Proliferation/Metastasis |
| 0.319666146 | TME                      |
| 0.018683173 | Metabolism               |
| 0.879983417 | TME                      |
| 0.00742261  | TME                      |
| 8.09E-06    | TME                      |
| 0.180605946 | TME                      |
| 0.017090638 | TME                      |
| 0.041755338 | TME                      |
| 0.248891057 | Metabolism               |
| 0.060542014 | TME                      |
| 0.014432584 | Metabolism               |
| 0.725491011 | Metabolism               |
| 0.38253519  | Proliferation/Metastasis |
| 0.033692908 | Proliferation/Metastasis |
| 2.73E-15    | Metabolism               |
| 2.82E-05    | Metabolism               |

|             |                          |
|-------------|--------------------------|
| 0.000562792 | Metabolism               |
| 0.000137988 | Metabolism               |
| 1.39E-05    | Proliferation/Metastasis |
| 0.002418598 | Proliferation/Metastasis |
| 0.3000123   | Metabolism               |
| 1.57E-06    | Metabolism               |
| 0.009142479 | Metabolism               |
| 0.392308834 | TME                      |
| 0.048275014 | Metabolism               |
| 0.348546492 | Metabolism               |
| 0.368927383 | Metabolism               |
| 0.000621462 | Metabolism               |
| 0.440651103 | Proliferation/Metastasis |
| 0.264219483 | Metabolism               |
| 0.020488939 | Metabolism               |
| 4.18E-05    | Metabolism               |
| 1.88E-22    | Metabolism               |
| 2.59E-28    | Metabolism               |
| 3.37E-06    | Metabolism               |
| 0.872120938 | Proliferation/Metastasis |
| 2.99E-09    | Metabolism               |
| 1.85E-11    | Metabolism               |
| 2.79E-12    | Proliferation/Metastasis |
| 0.005032699 | Metabolism               |
| 0.204677504 | Metabolism               |
| 0.026061131 | Metabolism               |
| 0.002526302 | Metabolism               |
| 0.000931657 | Metabolism               |
| 7.14E-08    | Metabolism               |
| 0.000123123 | Metabolism               |
| 0.720012479 | Metabolism               |
| 0.812294655 | TME                      |
| 0.154045548 | TME                      |
| 0.921977556 | TME                      |
| 0.013093553 | TME                      |
| 0.001739028 | TME                      |
| 0.008934354 | Metabolism               |
| 2.30E-06    | Metabolism               |
| 0.000389703 | Proliferation/Metastasis |
| 1.82E-05    | Metabolism               |
| 0.640448778 | Proliferation/Metastasis |
| 0.090052867 | Metabolism               |
| 3.77E-07    | TME                      |

|             |                          |
|-------------|--------------------------|
| 1.73E-05    | Metabolism               |
| 0.000302653 | Metabolism               |
| 0.006848824 | Metabolism               |
| 0.013101152 | Metabolism               |
| 0.673163984 | TME                      |
| 0.836033535 | TME                      |
| 7.29E-08    | Proliferation/Metastasis |
| 0.000821732 | Metabolism               |
| 0.653929693 | Proliferation/Metastasis |
| 0.424476435 | Proliferation/Metastasis |
| 0.000527826 | TME                      |
| 0.000880436 | TME                      |
| 3.29E-07    | TME                      |
| 4.31E-06    | TME                      |
| 0.313006574 | Metabolism               |
| 0.042791321 | Proliferation/Metastasis |
| 0.886117303 | Metabolism               |
| 3.64E-05    | Metabolism               |
| 0.003363015 | Proliferation/Metastasis |
| 3.52E-09    | Proliferation/Metastasis |
| 0.0588755   | Metabolism               |
| 0.002305761 | Metabolism               |
| 0.984826768 | Metabolism               |
| 0.254589514 | Metabolism               |
| 0.000569913 | TME                      |
| 6.24E-12    | TME                      |
| 1.38E-07    | TME                      |
| 0.001602492 | TME                      |
| 0.082420611 | TME                      |
| 6.27E-06    | Metabolism               |
| 0.14603817  | Metabolism               |
| 0.038233687 | Metabolism               |
| 0.183617968 | Metabolism               |
| 0.001309727 | Metabolism               |
| 7.50E-15    | TME                      |
| 1.58E-05    | TME                      |
| 9.75E-08    | TME                      |
| 0.146838218 | TME                      |
| 6.83E-07    | TME                      |
| 3.25E-06    | TME                      |
| 2.66E-06    | TME                      |
| 0.000506231 | TME                      |
| 1.71E-06    | TME                      |

|             |                          |
|-------------|--------------------------|
| 0.383200167 | Proliferation/Metastasis |
| 0.860562429 | Proliferation/Metastasis |
| 0.409343927 | Metabolism               |
| 0.408997764 | Metabolism               |
| 8.46E-05    | TME                      |
| 0.663992789 | Metabolism               |
| 0.855265997 | Metabolism               |
| 4.11E-08    | TME                      |
| 2.48E-07    | Proliferation/Metastasis |
| 0.405998203 | Proliferation/Metastasis |
| 0.045693669 | TME                      |
| 0.710923021 | Metabolism               |
| 0.031555977 | Metabolism               |
| 0.853028804 | Proliferation/Metastasis |
| 2.38E-10    | Proliferation/Metastasis |
| 0.115988209 | TME                      |
| 3.57E-08    | TME                      |
| 3.41E-05    | TME                      |
| 3.79E-08    | TME                      |
| 4.05E-09    | Proliferation/Metastasis |
| 6.63E-12    | TME                      |
| 1.25E-08    | TME                      |
| 0.062267136 | Metabolism               |
| 6.80E-13    | TME                      |
| 7.44E-12    | TME                      |
| 0.000262234 | TME                      |
| 0.041373348 | TME                      |
| 0.709492663 | Metabolism               |
| 0.840134455 | Metabolism               |
| 0.556602942 | Metabolism               |
| 4.97E-10    | TME                      |
| 0.021581243 | Metabolism               |
| 4.17E-05    | TME                      |
| 0.0014392   | TME                      |
| 1.21E-06    | TME                      |
| 0.005401713 | TME                      |
| 0.000817942 | TME                      |
| 0.002930211 | Metabolism               |
| 0.196593417 | Proliferation/Metastasis |
| 0.129111306 | Metabolism               |
| 1.08E-11    | Proliferation/Metastasis |
| 0.823126245 | Metabolism               |
| 0.233484732 | Metabolism               |

|             |                          |
|-------------|--------------------------|
| 0.000603283 | Metabolism               |
| 0.499474193 | Metabolism               |
| 0.872703224 | Metabolism               |
| 0.000105754 | Metabolism               |
| 0.003151324 | Metabolism               |
| 0.000549605 | Metabolism               |
| 4.76E-05    | Metabolism               |
| 1.14E-06    | Metabolism               |
| 3.89E-05    | Metabolism               |
| 3.11E-06    | Metabolism               |
| 0.001015067 | Metabolism               |
| 0.0081413   | Metabolism               |
| 1.11E-07    | TME                      |
| 7.16E-06    | Proliferation/Metastasis |
| 2.96E-06    | Metabolism               |
| 7.14E-07    | Proliferation/Metastasis |
| 4.09E-06    | TME                      |
| 5.19E-12    | Proliferation/Metastasis |
| 9.64E-13    | Proliferation/Metastasis |
| 1.02E-08    | TME                      |
| 1.12E-06    | TME                      |
| 2.53E-05    | Metabolism               |
| 5.23E-14    | Metabolism               |
| 0.000374157 | Proliferation/Metastasis |
| 0.007212808 | Proliferation/Metastasis |
| 2.47E-14    | Proliferation/Metastasis |
| 0.835337779 | Metabolism               |
| 1.81E-06    | Metabolism               |
| 0.274658366 | Metabolism               |
| 5.40E-07    | Proliferation/Metastasis |
| 5.58E-08    | TME                      |
| 2.11E-07    | TME                      |
| 4.02E-05    | Metabolism               |
| 3.99E-13    | Proliferation/Metastasis |
| 2.18E-12    | Metabolism               |
| 1.53E-07    | TME                      |
| 5.88E-05    | TME                      |
| 5.01E-06    | TME                      |
| 1.00E-11    | TME                      |
| 0.502168882 | Metabolism               |
| 0.003835702 | TME                      |
| 3.06E-06    | Proliferation/Metastasis |
| 7.89E-10    | TME                      |

|             |                          |
|-------------|--------------------------|
| 0.000460215 | Proliferation/Metastasis |
| 5.06E-05    | Proliferation/Metastasis |
| 2.05E-18    | Metabolism               |
| 0.029365775 | Proliferation/Metastasis |
| 2.32E-09    | TME                      |
| 0.006114778 | Metabolism               |
| 0.049264427 | TME                      |
| 1.33E-07    | TME                      |
| 0.007507765 | TME                      |
| 1.12E-06    | TME                      |
| 0.092335731 | TME                      |
| 1.29E-08    | TME                      |
| 0.000122506 | Metabolism               |
| 5.27E-10    | TME                      |
| 3.38E-05    | Metabolism               |
| 0.671762761 | Metabolism               |
| 5.00E-10    | Proliferation/Metastasis |
| 0.003814922 | Proliferation/Metastasis |
| 0.987240748 | Metabolism               |
| 0.793093302 | Metabolism               |
| 3.79E-05    | Metabolism               |
| 3.60E-05    | Metabolism               |
| 3.58E-05    | Proliferation/Metastasis |
| 2.74E-06    | Proliferation/Metastasis |
| 0.012624314 | Metabolism               |
| 0.993765939 | Metabolism               |
| 0.740340947 | Metabolism               |
| 3.30E-08    | TME                      |
| 0.54250579  | Metabolism               |
| 0.100568055 | Metabolism               |
| 0.143446698 | Metabolism               |
| 3.09E-12    | Metabolism               |
| 2.83E-11    | Proliferation/Metastasis |
| 0.577815858 | Metabolism               |
| 0.440547955 | Metabolism               |
| 0.261229657 | Metabolism               |
| 0.035668267 | Metabolism               |
| 0.001205959 | Metabolism               |
| 0.409694448 | Metabolism               |
| 0.386656987 | Proliferation/Metastasis |
| 0.773300036 | Metabolism               |
| 0.106242813 | Metabolism               |
| 3.86E-09    | Proliferation/Metastasis |

|             |                          |
|-------------|--------------------------|
| 0.445933051 | Metabolism               |
| 1.52E-08    | Metabolism               |
| 0.000106456 | Metabolism               |
| 0.001264981 | Metabolism               |
| 0.724157975 | Metabolism               |
| 0.681970594 | Metabolism               |
| 0.114516038 | Metabolism               |
| 0.016374899 | Metabolism               |
| 9.60E-08    | TME                      |
| 1.04E-06    | TME                      |
| 9.06E-07    | TME                      |
| 1.37E-05    | TME                      |
| 0.000208751 | TME                      |
| 9.61E-07    | Metabolism               |
| 0.394731498 | Metabolism               |
| 8.06E-09    | Proliferation/Metastasis |
| 0.053026093 | Metabolism               |
| 3.55E-11    | Proliferation/Metastasis |
| 0.064865528 | Metabolism               |
| 0.357340933 | TME                      |
| 0.44735782  | Metabolism               |
| 0.004596208 | Metabolism               |
| 0.025876476 | Metabolism               |
| 0.936848786 | Metabolism               |
| 3.58E-07    | TME                      |
| 0.000416707 | TME                      |
| 8.09E-06    | Proliferation/Metastasis |
| 0.386957882 | Metabolism               |
| 0.225562341 | Proliferation/Metastasis |
| 0.034088302 | Proliferation/Metastasis |
| 0.000539782 | TME                      |
| 1.36E-08    | TME                      |
| 7.88E-10    | TME                      |
| 2.03E-10    | TME                      |
| 0.002233517 | Metabolism               |
| 2.75E-11    | Proliferation/Metastasis |
| 0.304790511 | Metabolism               |
| 9.86E-16    | Metabolism               |
| 0.000932956 | Proliferation/Metastasis |
| 1.85E-08    | Proliferation/Metastasis |
| 0.00145675  | Metabolism               |
| 0.025647439 | Metabolism               |
| 0.445205612 | Metabolism               |



|             |                          |
|-------------|--------------------------|
| 0.000388685 | Metabolism               |
| 0.000122275 | TME                      |
| 3.39E-09    | TME                      |
| 6.50E-07    | TME                      |
| 9.88E-05    | TME                      |
| 2.14E-05    | TME                      |
| 0.618803457 | Metabolism               |
| 0.299786327 | Metabolism               |
| 0.006268856 | Metabolism               |
| 0.001513615 | Metabolism               |
| 0.111907004 | Metabolism               |
| 6.96E-08    | TME                      |
| 0.05837124  | TME                      |
| 4.32E-13    | TME                      |
| 0.000718566 | TME                      |
| 3.22E-08    | TME                      |
| 3.02E-08    | TME                      |
| 6.78E-09    | TME                      |
| 1.27E-10    | TME                      |
| 2.57E-08    | TME                      |
| 0.435686461 | Proliferation/Metastasis |
| 5.56E-05    | Proliferation/Metastasis |
| 0.52069104  | Metabolism               |
| 0.621452786 | Metabolism               |
| 2.63E-06    | TME                      |
| 0.06913209  | Metabolism               |
| 8.49E-06    | Metabolism               |
| 1.45E-12    | TME                      |
| 0.004981615 | Proliferation/Metastasis |
| 0.00215729  | Proliferation/Metastasis |
| 2.06E-06    | TME                      |
| 0.07905802  | Metabolism               |
| 5.89E-05    | Metabolism               |
| 0.209377944 | Proliferation/Metastasis |
| 6.59E-07    | Proliferation/Metastasis |
| 0.009956583 | TME                      |
| 1.53E-14    | TME                      |
| 6.62E-06    | TME                      |
| 2.48E-08    | TME                      |
| 0.002416244 | Proliferation/Metastasis |
| 5.08E-07    | TME                      |
| 5.74E-15    | TME                      |
| 0.137136166 | Metabolism               |

|             |                          |
|-------------|--------------------------|
| 2.82E-10    | TME                      |
| 1.46E-10    | TME                      |
| 2.00E-09    | TME                      |
| 0.062484181 | TME                      |
| 0.006050542 | Metabolism               |
| 0.000144811 | Metabolism               |
| 0.001151689 | Metabolism               |
| 1.24E-08    | TME                      |
| 0.124536531 | Metabolism               |
| 2.58E-06    | TME                      |
| 3.40E-05    | TME                      |
| 1.05E-10    | TME                      |
| 4.48E-08    | TME                      |
| 0.001418938 | TME                      |
| 6.90E-05    | Metabolism               |
| 0.779089392 | Proliferation/Metastasis |
| 1.81E-11    | Metabolism               |
| 0.041350283 | Proliferation/Metastasis |
| 0.000735664 | Metabolism               |
| 0.110977245 | Metabolism               |
| 0.122948444 | Metabolism               |
| 0.047176901 | Metabolism               |
| 0.093123604 | Metabolism               |
| 6.35E-10    | Metabolism               |
| 0.808786515 | Metabolism               |
| 9.77E-07    | Metabolism               |
| 0.000125575 | Metabolism               |
| 3.61E-05    | Metabolism               |
| 0.006081582 | Metabolism               |
| 0.000506789 | Metabolism               |
| 0.014752069 | Metabolism               |
| 0.428350261 | Metabolism               |
| 4.59E-13    | TME                      |
| 0.866926392 | Proliferation/Metastasis |
| 0.286278325 | Metabolism               |
| 7.78E-10    | Proliferation/Metastasis |
| 5.04E-09    | TME                      |
| 3.34E-16    | Proliferation/Metastasis |
| 6.33E-17    | Proliferation/Metastasis |
| 2.41E-10    | TME                      |
| 6.44E-21    | TME                      |
| 6.99E-08    | Metabolism               |
| 0.001271514 | Metabolism               |

|             |                          |
|-------------|--------------------------|
| 3.65E-06    | Proliferation/Metastasis |
| 0.955349091 | Proliferation/Metastasis |
| 3.00E-10    | Proliferation/Metastasis |
| 0.018140224 | Metabolism               |
| 0.006092873 | Metabolism               |
| 9.09E-07    | Metabolism               |
| 1.33E-05    | Proliferation/Metastasis |
| 1.55E-13    | TME                      |
| 4.41E-19    | TME                      |
| 0.936930609 | Metabolism               |
| 0.000141429 | Proliferation/Metastasis |
| 0.027562791 | Metabolism               |
| 0.000126383 | TME                      |
| 4.33E-06    | TME                      |
| 6.47E-08    | TME                      |
| 5.71E-09    | TME                      |
| 0.362336569 | Metabolism               |
| 0.008649853 | TME                      |
| 0.215435723 | Proliferation/Metastasis |
| 7.22E-21    | TME                      |
| 0.109825961 | Proliferation/Metastasis |
| 7.65E-08    | Proliferation/Metastasis |
| 0.308757544 | Metabolism               |
| 0.018667263 | Proliferation/Metastasis |
| 8.27E-12    | TME                      |
| 0.187016854 | Metabolism               |
| 1.05E-06    | TME                      |
| 0.041008826 | TME                      |
| 0.825735184 | TME                      |
| 3.58E-11    | TME                      |
| 1.71E-05    | TME                      |
| 3.14E-07    | TME                      |
| 3.91E-07    | Metabolism               |
| 4.31E-22    | TME                      |
| 2.41E-05    | Metabolism               |
| 0.465288762 | Metabolism               |
| 5.28E-14    | Proliferation/Metastasis |
| 0.055907277 | Proliferation/Metastasis |
| 0.603581643 | Metabolism               |
| 0.446168658 | Metabolism               |
| 0.001398401 | Metabolism               |
| 8.27E-05    | Metabolism               |
| 6.20E-09    | Proliferation/Metastasis |

|             |                          |
|-------------|--------------------------|
| 0.540704204 | Proliferation/Metastasis |
| 3.77E-09    | Metabolism               |
| 0.040266573 | Metabolism               |
| 9.81E-07    | Metabolism               |
| 8.75E-08    | TME                      |
| 0.000623528 | Metabolism               |
| 0.0121581   | Metabolism               |
| 0.006424808 | Metabolism               |
| 0.236475509 | Metabolism               |
| 0.000107051 | Proliferation/Metastasis |
| 0.296547693 | Metabolism               |
| 0.528326015 | Metabolism               |
| 1.57E-07    | Metabolism               |
| 0.000459389 | Metabolism               |
| 3.51E-06    | Metabolism               |
| 0.70128425  | Metabolism               |
| 0.727112757 | Proliferation/Metastasis |
| 0.028740134 | Metabolism               |
| 6.01E-15    | Metabolism               |
| 0.179311426 | Proliferation/Metastasis |
| 0.006755767 | Metabolism               |
| 0.229842881 | Metabolism               |
| 0.251140658 | Metabolism               |
| 0.000122908 | Metabolism               |
| 0.024211272 | Metabolism               |
| 0.195061378 | Metabolism               |
| 0.013701582 | Metabolism               |
| 0.140730789 | Metabolism               |
| 1.44E-10    | TME                      |
| 4.20E-14    | TME                      |
| 1.41E-16    | TME                      |
| 4.01E-11    | TME                      |
| 1.15E-08    | TME                      |
| 0.013172565 | Metabolism               |
| 0.239880809 | Metabolism               |
| 0.000422094 | Proliferation/Metastasis |
| 0.00055915  | Metabolism               |
| 2.72E-16    | Proliferation/Metastasis |
| 0.001307518 | Metabolism               |
| 0.000110888 | TME                      |
| 0.289505984 | Metabolism               |
| 0.074142145 | Metabolism               |
| 6.92E-10    | Metabolism               |

|             |                          |
|-------------|--------------------------|
| 5.93E-06    | Metabolism               |
| 4.92E-08    | TME                      |
| 0.000800247 | TME                      |
| 0.008160021 | Proliferation/Metastasis |
| 0.000574814 | Metabolism               |
| 0.694922543 | Proliferation/Metastasis |
| 0.102073222 | Proliferation/Metastasis |
| 0.227493379 | TME                      |
| 0.015718058 | TME                      |
| 0.008499778 | TME                      |
| 0.007865572 | TME                      |
| 0.98774537  | Metabolism               |
| 4.73E-06    | Proliferation/Metastasis |
| 0.525178906 | Metabolism               |
| 0.000395706 | Metabolism               |
| 0.364225392 | Proliferation/Metastasis |
| 0.031232715 | Proliferation/Metastasis |
| 0.467991454 | Metabolism               |
| 0.000143576 | Metabolism               |
| 0.746541446 | Metabolism               |
| 0.61710378  | Metabolism               |
| 0.014389179 | TME                      |
| 0.015697385 | TME                      |
| 0.054003884 | TME                      |
| 0.056628887 | TME                      |
| 0.003379675 | TME                      |
| 0.047445262 | Metabolism               |
| 0.034727833 | Metabolism               |
| 0.528260817 | Metabolism               |
| 0.499037761 | Metabolism               |
| 0.440399022 | Metabolism               |
| 0.107533814 | TME                      |
| 0.222992569 | TME                      |
| 0.013734363 | TME                      |
| 0.000703373 | TME                      |
| 0.070727934 | TME                      |
| 0.030870077 | TME                      |
| 0.021377412 | TME                      |
| 0.010240077 | TME                      |
| 0.003254686 | TME                      |
| 4.20E-05    | Proliferation/Metastasis |
| 0.076445153 | Proliferation/Metastasis |
| 0.000337079 | Metabolism               |

|             |                          |
|-------------|--------------------------|
| 0.018451393 | Metabolism               |
| 0.075487035 | TME                      |
| 0.854293131 | Metabolism               |
| 0.186463415 | Metabolism               |
| 0.008864919 | TME                      |
| 0.000177282 | Proliferation/Metastasis |
| 0.000133927 | Proliferation/Metastasis |
| 0.042697836 | TME                      |
| 0.385162904 | Metabolism               |
| 0.150707547 | Metabolism               |
| 0.000169811 | Proliferation/Metastasis |
| 0.106499094 | Proliferation/Metastasis |
| 0.000977009 | TME                      |
| 0.017466516 | TME                      |
| 0.002013433 | TME                      |
| 0.043144553 | TME                      |
| 1.71E-07    | Proliferation/Metastasis |
| 0.044931167 | TME                      |
| 0.003124854 | TME                      |
| 0.771246029 | Metabolism               |
| 0.001539709 | TME                      |
| 0.004479191 | TME                      |
| 0.016909235 | TME                      |
| 0.409303417 | TME                      |
| 0.625934372 | Metabolism               |
| 0.933801016 | Metabolism               |
| 0.014249679 | Metabolism               |
| 0.026147815 | TME                      |
| 0.155774838 | Metabolism               |
| 0.037444357 | TME                      |
| 0.039184431 | TME                      |
| 0.009088497 | TME                      |
| 0.009437468 | TME                      |
| 0.091930609 | TME                      |
| 0.052624296 | Metabolism               |
| 0.000143916 | Proliferation/Metastasis |
| 0.000625582 | Metabolism               |
| 0.232727642 | Proliferation/Metastasis |
| 0.014643179 | Metabolism               |
| 0.054146014 | Metabolism               |
| 0.05771562  | Metabolism               |
| 0.100387465 | Metabolism               |
| 0.079207094 | Metabolism               |

|             |                          |
|-------------|--------------------------|
| 0.164933478 | Metabolism               |
| 0.793477032 | Metabolism               |
| 0.09062359  | Metabolism               |
| 0.383111479 | Metabolism               |
| 0.564001926 | Metabolism               |
| 0.182000361 | Metabolism               |
| 0.965435285 | Metabolism               |
| 0.726214713 | Metabolism               |
| 0.073737812 | Metabolism               |
| 0.007383785 | TME                      |
| 0.538786778 | Proliferation/Metastasis |
| 0.318882662 | Metabolism               |
| 0.027686562 | Proliferation/Metastasis |
| 0.006264231 | TME                      |
| 0.005880578 | Proliferation/Metastasis |
| 0.002535237 | Proliferation/Metastasis |
| 0.034286801 | TME                      |
| 0.008356784 | TME                      |
| 0.434654368 | Metabolism               |
| 0.060336631 | Metabolism               |
| 0.002312888 | Proliferation/Metastasis |
| 0.01011387  | Proliferation/Metastasis |
| 0.102277335 | Proliferation/Metastasis |
| 0.191476712 | Metabolism               |
| 0.252826841 | Metabolism               |
| 0.553538838 | Metabolism               |
| 0.131350089 | Proliferation/Metastasis |
| 0.001256703 | TME                      |
| 0.001827803 | TME                      |
| 0.194721355 | Metabolism               |
| 0.060353267 | Proliferation/Metastasis |
| 0.024751127 | Metabolism               |
| 0.014840285 | TME                      |
| 0.094161327 | TME                      |
| 0.043983348 | TME                      |
| 0.056676728 | TME                      |
| 0.93121992  | Metabolism               |
| 0.319376398 | TME                      |
| 0.026823118 | Proliferation/Metastasis |
| 0.001530571 | TME                      |
| 0.565447889 | Proliferation/Metastasis |
| 4.77E-07    | Proliferation/Metastasis |
| 0.241653867 | Metabolism               |

|             |                          |
|-------------|--------------------------|
| 2.32E-06    | Proliferation/Metastasis |
| 0.009795846 | TME                      |
| 0.002537509 | Metabolism               |
| 0.022891529 | TME                      |
| 0.017982085 | TME                      |
| 0.359907139 | TME                      |
| 0.01161717  | TME                      |
| 0.000753398 | TME                      |
| 0.029374814 | TME                      |
| 0.000722143 | Metabolism               |
| 0.000976039 | TME                      |
| 0.823315131 | Metabolism               |
| 0.010257759 | Metabolism               |
| 0.00117147  | Proliferation/Metastasis |
| 0.029839877 | Proliferation/Metastasis |
| 0.005739679 | Metabolism               |
| 0.042483709 | Metabolism               |
| 0.328311383 | Metabolism               |
| 0.046256142 | Metabolism               |
| 0.004032516 | Proliferation/Metastasis |
| 0.000116017 | Proliferation/Metastasis |
| 0.15872158  | Metabolism               |
| 0.513170898 | Metabolism               |
| 0.009021372 | Metabolism               |
| 0.124125271 | TME                      |
| 0.087014343 | Metabolism               |
| 0.945553611 | Metabolism               |
| 0.6075946   | Metabolism               |
| 0.322050109 | Metabolism               |
| 6.53E-06    | Proliferation/Metastasis |
| 0.197858401 | Metabolism               |
| 0.001561538 | Metabolism               |
| 0.831550762 | Metabolism               |
| 0.000234703 | Metabolism               |
| 7.46E-05    | Metabolism               |
| 0.112020959 | Metabolism               |
| 0.380419961 | Proliferation/Metastasis |
| 0.463106884 | Metabolism               |
| 0.123452747 | Metabolism               |
| 0.30192277  | Proliferation/Metastasis |
| 0.469253429 | Metabolism               |
| 0.442662513 | Metabolism               |
| 0.186764965 | Metabolism               |



|             |                          |
|-------------|--------------------------|
| 0.400419374 | Metabolism               |
| 0.375804997 | Metabolism               |
| 0.453121704 | Metabolism               |
| 0.195218266 | Metabolism               |
| 0.496753787 | Metabolism               |
| 0.004465758 | TME                      |
| 0.009737936 | TME                      |
| 0.021376005 | TME                      |
| 0.024869552 | TME                      |
| 0.040077294 | TME                      |
| 4.74E-07    | Metabolism               |
| 0.131655057 | Metabolism               |
| 0.985522742 | Proliferation/Metastasis |
| 0.168847561 | Metabolism               |
| 0.002328202 | Proliferation/Metastasis |
| 0.023128357 | Metabolism               |
| 0.001860357 | TME                      |
| 0.492833253 | Metabolism               |
| 0.031120731 | Metabolism               |
| 0.000429779 | Metabolism               |
| 0.599187341 | Metabolism               |
| 0.119055623 | TME                      |
| 0.425114384 | TME                      |
| 0.015411546 | Proliferation/Metastasis |
| 0.713886299 | Metabolism               |
| 0.293430971 | Proliferation/Metastasis |
| 0.497386468 | Proliferation/Metastasis |
| 0.246008427 | TME                      |
| 0.000905905 | TME                      |
| 0.008666763 | TME                      |
| 0.001411199 | TME                      |
| 3.27E-14    | Metabolism               |
| 0.100044831 | Proliferation/Metastasis |
| 1.12E-13    | Metabolism               |
| 0.890269201 | Metabolism               |
| 1.25E-24    | Proliferation/Metastasis |
| 5.35E-17    | Proliferation/Metastasis |
| 1.23E-45    | Metabolism               |
| 0.031026995 | Metabolism               |
| 0.876023445 | Metabolism               |
| 0.073818387 | Metabolism               |
| 2.92E-05    | TME                      |
| 1.22E-18    | TME                      |

|             |                          |
|-------------|--------------------------|
| 6.99E-05    | TME                      |
| 4.29E-05    | TME                      |
| 5.85E-30    | TME                      |
| 0.00349225  | Metabolism               |
| 0.046358941 | Metabolism               |
| 0.000145468 | Metabolism               |
| 0.019604933 | Metabolism               |
| 0.002300562 | Metabolism               |
| 6.48E-14    | TME                      |
| 6.26E-08    | TME                      |
| 1.03E-13    | TME                      |
| 0.004123124 | TME                      |
| 0.011631665 | TME                      |
| 6.59E-05    | TME                      |
| 0.000413961 | TME                      |
| 7.23E-06    | TME                      |
| 0.071174687 | TME                      |
| 2.25E-21    | Proliferation/Metastasis |
| 1.61E-44    | Proliferation/Metastasis |
| 0.006469121 | Metabolism               |
| 5.20E-07    | Metabolism               |
| 1.97E-05    | TME                      |
| 0.176491283 | Metabolism               |
| 2.31E-11    | Metabolism               |
| 1.10E-11    | TME                      |
| 0.964980699 | Proliferation/Metastasis |
| 4.65E-08    | Proliferation/Metastasis |
| 5.55E-05    | TME                      |
| 8.80E-12    | Metabolism               |
| 1.16E-06    | Metabolism               |
| 3.52E-20    | Proliferation/Metastasis |
| 1.27E-08    | Proliferation/Metastasis |
| 0.035225004 | TME                      |
| 1.40E-07    | TME                      |
| 0.000686936 | TME                      |
| 0.142022915 | TME                      |
| 1.05E-18    | Proliferation/Metastasis |
| 8.90E-18    | TME                      |
| 9.45E-07    | TME                      |
| 8.18E-12    | Metabolism               |
| 0.000210523 | TME                      |
| 1.71E-08    | TME                      |
| 0.000468784 | TME                      |

|             |                          |
|-------------|--------------------------|
| 1.28E-09    | TME                      |
| 0.541643413 | Metabolism               |
| 0.03736684  | Metabolism               |
| 0.071472883 | Metabolism               |
| 6.52E-13    | TME                      |
| 0.104484679 | Metabolism               |
| 1.67E-05    | TME                      |
| 0.028392935 | TME                      |
| 5.70E-05    | TME                      |
| 4.57E-05    | TME                      |
| 0.657866059 | TME                      |
| 0.138221008 | Metabolism               |
| 5.99E-31    | Proliferation/Metastasis |
| 0.006997957 | Metabolism               |
| 1.70E-06    | Proliferation/Metastasis |
| 1.91E-08    | Metabolism               |
| 7.06E-07    | Metabolism               |
| 3.88E-16    | Metabolism               |
| 0.006650286 | Metabolism               |
| 0.544488434 | Metabolism               |
| 3.70E-28    | Metabolism               |
| 0.611729641 | Metabolism               |
| 7.03E-06    | Metabolism               |
| 2.44E-16    | Metabolism               |
| 3.87E-10    | Metabolism               |
| 1.73E-08    | Metabolism               |
| 0.08106795  | Metabolism               |
| 0.000329403 | Metabolism               |
| 0.362013284 | Metabolism               |
| 1.11E-05    | TME                      |
| 0.180280151 | Proliferation/Metastasis |
| 2.64E-08    | Metabolism               |
| 8.10E-10    | Proliferation/Metastasis |
| 0.000340403 | TME                      |
| 1.23E-15    | Proliferation/Metastasis |
| 4.98E-08    | Proliferation/Metastasis |
| 2.59E-05    | TME                      |
| 5.15E-19    | TME                      |
| 5.82E-17    | Metabolism               |
| 0.000163231 | Metabolism               |
| 1.22E-07    | Proliferation/Metastasis |
| 4.69E-14    | Proliferation/Metastasis |
| 8.32E-16    | Proliferation/Metastasis |

|             |                          |
|-------------|--------------------------|
| 1.16E-13    | Metabolism               |
| 0.230511416 | Metabolism               |
| 5.93E-20    | Metabolism               |
| 0.001820562 | Proliferation/Metastasis |
| 1.07E-05    | TME                      |
| 1.66E-07    | TME                      |
| 0.364657421 | Metabolism               |
| 1.85E-05    | Proliferation/Metastasis |
| 1.74E-06    | Metabolism               |
| 0.004933144 | TME                      |
| 0.101846843 | TME                      |
| 5.45E-29    | TME                      |
| 3.26E-13    | TME                      |
| 1.57E-11    | Metabolism               |
| 0.074473842 | TME                      |
| 2.46E-30    | Proliferation/Metastasis |
| 1.71E-22    | TME                      |
| 9.38E-06    | Proliferation/Metastasis |
| 1.78E-08    | Proliferation/Metastasis |
| 0.151724845 | Metabolism               |
| 9.25E-06    | Proliferation/Metastasis |
| 2.24E-05    | TME                      |
| 1.68E-05    | Metabolism               |
| 0.045629095 | TME                      |
| 4.37E-08    | TME                      |
| 4.78E-06    | TME                      |
| 2.65E-05    | TME                      |
| 0.001004843 | TME                      |
| 0.012073571 | TME                      |
| 0.259140584 | Metabolism               |
| 1.10E-14    | TME                      |
| 0.796158655 | Metabolism               |
| 0.110577749 | Metabolism               |
| 0.138690116 | Proliferation/Metastasis |
| 1.07E-14    | Proliferation/Metastasis |
| 9.41E-13    | Metabolism               |
| 0.067751915 | Metabolism               |
| 5.90E-08    | Metabolism               |
| 3.39E-10    | Metabolism               |
| 2.34E-35    | Proliferation/Metastasis |
| 0.000184757 | Proliferation/Metastasis |
| 0.747241075 | Metabolism               |
| 0.216800354 | Metabolism               |

|             |                          |
|-------------|--------------------------|
| 0.646325305 | Metabolism               |
| 9.91E-25    | TME                      |
| 7.60E-12    | Metabolism               |
| 0.137185402 | Metabolism               |
| 2.27E-06    | Metabolism               |
| 0.109318002 | Metabolism               |
| 0.000122627 | Proliferation/Metastasis |
| 0.349161448 | Metabolism               |
| 8.80E-08    | Metabolism               |
| 7.88E-09    | Metabolism               |
| 0.001958426 | Metabolism               |
| 0.000283224 | Metabolism               |
| 0.039054716 | Metabolism               |
| 0.003414268 | Proliferation/Metastasis |
| 2.02E-08    | Metabolism               |
| 0.789784569 | Metabolism               |
| 0.011374175 | Proliferation/Metastasis |
| 2.64E-23    | Metabolism               |
| 4.31E-12    | Metabolism               |
| 2.92E-09    | Metabolism               |
| 0.018572919 | Metabolism               |
| 0.010011537 | Metabolism               |
| 1.17E-05    | Metabolism               |
| 0.21457606  | Metabolism               |
| 0.094759138 | Metabolism               |
| 1.32E-09    | TME                      |
| 5.69E-05    | TME                      |
| 4.25E-11    | TME                      |
| 2.60E-12    | TME                      |
| 1.61E-05    | TME                      |
| 1.26E-06    | Metabolism               |
| 6.17E-07    | Metabolism               |
| 0.403998903 | Proliferation/Metastasis |
| 0.000239824 | Metabolism               |
| 1.03E-12    | Proliferation/Metastasis |
| 0.000811503 | Metabolism               |
| 3.09E-07    | TME                      |
| 8.97E-12    | Metabolism               |
| 0.113484344 | Metabolism               |
| 5.32E-06    | Metabolism               |
| 0.001291755 | Metabolism               |
| 1.14E-47    | TME                      |
| 4.16E-18    | TME                      |

|             |                          |
|-------------|--------------------------|
| 1.11E-09    | Proliferation/Metastasis |
| 0.123990796 | Metabolism               |
| 0.465335072 | Proliferation/Metastasis |
| 5.21E-09    | Proliferation/Metastasis |
| 0.03388222  | TME                      |
| 0.118804026 | TME                      |
| 0.000561348 | TME                      |
| 0.074003374 | TME                      |
| 8.19E-07    | Metabolism               |
| 1.33E-05    | Proliferation/Metastasis |
| 1.43E-16    | Metabolism               |
| 0.001918706 | Metabolism               |
| 0.138824449 | Proliferation/Metastasis |
| 8.17E-05    | Proliferation/Metastasis |
| 5.65E-30    | Metabolism               |
| 0.000743654 | Metabolism               |
| 0.346774441 | Metabolism               |
| 0.607447784 | Metabolism               |
| 0.135269936 | TME                      |
| 0.077926691 | TME                      |
| 0.000286832 | TME                      |
| 0.818264267 | TME                      |
| 0.018596433 | TME                      |
| 0.10599919  | Metabolism               |
| 0.227056383 | Metabolism               |
| 0.062355971 | Metabolism               |
| 0.009249391 | Metabolism               |
| 0.050924507 | Metabolism               |
| 1.08E-12    | TME                      |
| 1.58E-07    | TME                      |
| 0.933342428 | TME                      |
| 0.158613739 | TME                      |
| 0.01527537  | TME                      |
| 0.021754283 | TME                      |
| 0.011346289 | TME                      |
| 0.665534721 | TME                      |
| 0.048788491 | TME                      |
| 1.48E-13    | Proliferation/Metastasis |
| 5.88E-38    | Proliferation/Metastasis |
| 0.599828648 | Metabolism               |
| 0.003170514 | Metabolism               |
| 0.521238524 | TME                      |
| 0.572625245 | Metabolism               |

|             |                          |
|-------------|--------------------------|
| 5.51E-26    | Metabolism               |
| 1.58E-05    | TME                      |
| 5.76E-37    | Proliferation/Metastasis |
| 0.042045854 | Proliferation/Metastasis |
| 0.002472897 | TME                      |
| 9.90E-05    | Metabolism               |
| 2.63E-21    | Metabolism               |
| 2.95E-08    | Proliferation/Metastasis |
| 1.41E-09    | Proliferation/Metastasis |
| 5.90E-07    | TME                      |
| 0.003912145 | TME                      |
| 0.001324267 | TME                      |
| 1.17E-12    | TME                      |
| 1.07E-34    | Proliferation/Metastasis |
| 3.56E-11    | TME                      |
| 0.001771606 | TME                      |
| 0.75068067  | Metabolism               |
| 2.10E-08    | TME                      |
| 0.003352433 | TME                      |
| 0.434053097 | TME                      |
| 0.000589982 | TME                      |
| 3.36E-05    | Metabolism               |
| 0.224956658 | Metabolism               |
| 0.000100421 | Metabolism               |
| 5.51E-11    | TME                      |
| 3.48E-06    | Metabolism               |
| 0.000211291 | TME                      |
| 0.007661263 | TME                      |
| 0.005601555 | TME                      |
| 2.91E-06    | TME                      |
| 0.375881117 | TME                      |
| 3.04E-16    | Metabolism               |
| 8.03E-20    | Proliferation/Metastasis |
| 1.26E-06    | Metabolism               |
| 0.000447798 | Proliferation/Metastasis |
| 2.05E-09    | Metabolism               |
| 0.000108362 | Metabolism               |
| 4.13E-23    | Metabolism               |
| 3.27E-22    | Metabolism               |
| 0.139038059 | Metabolism               |
| 1.49E-09    | Metabolism               |
| 0.664695469 | Metabolism               |
| 0.683228204 | Metabolism               |

|             |                          |
|-------------|--------------------------|
| 0.000966316 | Metabolism               |
| 0.533078491 | Metabolism               |
| 8.30E-05    | Metabolism               |
| 3.24E-05    | Metabolism               |
| 0.197775917 | Metabolism               |
| 2.53E-08    | Metabolism               |
| 4.98E-06    | TME                      |
| 4.38E-14    | Proliferation/Metastasis |
| 0.068124841 | Metabolism               |
| 0.233796368 | Proliferation/Metastasis |
| 0.048881506 | TME                      |
| 2.51E-05    | Proliferation/Metastasis |
| 4.01E-07    | Proliferation/Metastasis |
| 4.52E-07    | TME                      |
| 0.23409256  | TME                      |
| 8.79E-47    | Metabolism               |
| 3.51E-53    | Metabolism               |
| 7.11E-21    | Proliferation/Metastasis |
| 2.39E-05    | Proliferation/Metastasis |
| 2.08E-12    | Proliferation/Metastasis |
| 5.36E-17    | Metabolism               |
| 1.74E-09    | Metabolism               |
| 1.18E-07    | Metabolism               |
| 0.202326157 | Proliferation/Metastasis |
| 4.32E-09    | TME                      |
| 0.000160036 | TME                      |
| 1.36E-15    | Metabolism               |
| 1.45E-10    | Proliferation/Metastasis |
| 3.41E-48    | Metabolism               |
| 5.59E-09    | TME                      |
| 1.14E-08    | TME                      |
| 0.578328681 | TME                      |
| 6.31E-11    | TME                      |
| 4.16E-09    | Metabolism               |
| 6.47E-09    | TME                      |
| 6.03E-56    | Proliferation/Metastasis |
| 0.576395655 | TME                      |
| 5.05E-08    | Proliferation/Metastasis |
| 1.07E-08    | Proliferation/Metastasis |
| 2.99E-19    | Metabolism               |
| 0.949637321 | Proliferation/Metastasis |
| 3.13E-08    | TME                      |
| 0.688729436 | Metabolism               |



|             |                          |
|-------------|--------------------------|
| 0.485530802 | TME                      |
| 1.95E-06    | TME                      |
| 6.83E-05    | TME                      |
| 0.003363154 | TME                      |
| 0.03073588  | TME                      |
| 1.64E-06    | TME                      |
| 0.161486473 | Metabolism               |
| 1.87E-05    | TME                      |
| 0.64111631  | Metabolism               |
| 2.92E-05    | Metabolism               |
| 3.22E-16    | Proliferation/Metastasis |
| 0.111940499 | Proliferation/Metastasis |
| 4.26E-09    | Metabolism               |
| 4.30E-12    | Metabolism               |
| 6.92E-27    | Metabolism               |
| 9.01E-35    | Metabolism               |
| 9.81E-26    | Proliferation/Metastasis |
| 2.15E-15    | Proliferation/Metastasis |
| 0.231878017 | Metabolism               |
| 0.253958075 | Metabolism               |
| 8.96E-07    | Metabolism               |
| 0.009255469 | TME                      |
| 5.36E-11    | Metabolism               |
| 0.008637047 | Metabolism               |
| 8.61E-12    | Metabolism               |
| 1.52E-18    | Metabolism               |
| 2.84E-06    | Proliferation/Metastasis |
| 2.48E-11    | Metabolism               |
| 1.97E-06    | Metabolism               |
| 1.26E-09    | Metabolism               |
| 0.023143707 | Metabolism               |
| 1.19E-08    | Metabolism               |
| 0.615087509 | Metabolism               |
| 0.463393432 | Proliferation/Metastasis |
| 6.31E-05    | Metabolism               |
| 9.79E-13    | Metabolism               |
| 1.05E-18    | Proliferation/Metastasis |
| 5.77E-14    | Metabolism               |
| 5.12E-65    | Metabolism               |
| 1.88E-09    | Metabolism               |
| 0.000409304 | Metabolism               |
| 0.283701155 | Metabolism               |
| 1.74E-05    | Metabolism               |

|             |                          |
|-------------|--------------------------|
| 0.133001595 | Metabolism               |
| 0.01525423  | Metabolism               |
| 0.012193677 | TME                      |
| 0.002552184 | TME                      |
| 0.002013524 | TME                      |
| 0.386145011 | TME                      |
| 0.761003413 | TME                      |
| 6.31E-21    | Metabolism               |
| 0.249148972 | Metabolism               |
| 6.80E-45    | Proliferation/Metastasis |
| 3.75E-25    | Metabolism               |
| 8.02E-05    | Proliferation/Metastasis |
| 0.084189062 | Metabolism               |
| 0.689808688 | TME                      |
| 1.08E-21    | Metabolism               |
| 3.47E-06    | Metabolism               |
| 1.49E-12    | Metabolism               |
| 0.330599254 | Metabolism               |
| 0.507614673 | TME                      |
| 0.173962418 | TME                      |
| 0.102942573 | Proliferation/Metastasis |
| 0.339387116 | Metabolism               |
| 4.10E-05    | Proliferation/Metastasis |
| 0.017844645 | Proliferation/Metastasis |
| 2.58E-14    | TME                      |
| 0.001853863 | TME                      |
| 0.055577759 | TME                      |
| 0.000149199 | TME                      |
| 0.005757584 | Metabolism               |
| 1.35E-44    | Proliferation/Metastasis |
| 9.80E-12    | Metabolism               |
| 1.38E-19    | Metabolism               |
| 4.97E-05    | Proliferation/Metastasis |
| 8.99E-05    | Proliferation/Metastasis |
| 1.38E-11    | Metabolism               |
| 3.59E-46    | Metabolism               |
| 0.641702235 | Metabolism               |
| 0.050730592 | Metabolism               |
| 0.282863706 | TME                      |
| 6.12E-33    | TME                      |
| 0.279446051 | TME                      |
| 0.374550899 | TME                      |
| 1.17E-18    | TME                      |

|             |                          |
|-------------|--------------------------|
| 0.587329821 | Metabolism               |
| 5.93E-09    | Metabolism               |
| 3.02E-09    | Metabolism               |
| 3.93E-08    | Metabolism               |
| 3.83E-49    | Metabolism               |
| 0.013934259 | TME                      |
| 0.000223379 | TME                      |
| 0.191110125 | TME                      |
| 0.296040368 | TME                      |
| 0.001428056 | TME                      |
| 0.886507242 | TME                      |
| 0.351250841 | TME                      |
| 0.000168825 | TME                      |
| 0.292082043 | TME                      |
| 4.23E-60    | Proliferation/Metastasis |
| 0.568472921 | Proliferation/Metastasis |
| 1.49E-23    | Metabolism               |
| 3.28E-63    | Metabolism               |
| 0.061498147 | TME                      |
| 0.477324721 | Metabolism               |
| 1.06E-19    | Metabolism               |
| 0.981666502 | TME                      |
| 7.88E-33    | Proliferation/Metastasis |
| 3.93E-81    | Proliferation/Metastasis |
| 0.005493348 | TME                      |
| 2.94E-07    | Metabolism               |
| 2.57E-11    | Metabolism               |
| 2.39E-85    | Proliferation/Metastasis |
| 6.45E-15    | Proliferation/Metastasis |
| 0.23088906  | TME                      |
| 0.127061045 | TME                      |
| 0.860014678 | TME                      |
| 0.471030736 | TME                      |
| 1.02E-25    | Proliferation/Metastasis |
| 0.599692675 | TME                      |
| 0.10045127  | TME                      |
| 3.41E-10    | Metabolism               |
| 0.461750346 | TME                      |
| 0.054219009 | TME                      |
| 0.00223125  | TME                      |
| 1.15E-07    | TME                      |
| 0.000143563 | Metabolism               |
| 1.48E-10    | Metabolism               |

|             |                          |
|-------------|--------------------------|
| 0.500508609 | Metabolism               |
| 7.45E-10    | TME                      |
| 0.0014401   | Metabolism               |
| 0.944035796 | TME                      |
| 0.190582674 | TME                      |
| 0.013134421 | TME                      |
| 7.06E-07    | TME                      |
| 3.04E-09    | TME                      |
| 9.40E-06    | Metabolism               |
| 1.42E-65    | Proliferation/Metastasis |
| 2.83E-38    | Metabolism               |
| 5.68E-09    | Proliferation/Metastasis |
| 2.30E-16    | Metabolism               |
| 4.21E-06    | Metabolism               |
| 9.30E-06    | Metabolism               |
| 1.15E-07    | Metabolism               |
| 6.27E-21    | Metabolism               |
| 0.001164376 | Metabolism               |
| 2.33E-09    | Metabolism               |
| 2.33E-24    | Metabolism               |
| 4.18E-05    | Metabolism               |
| 0.113811907 | Metabolism               |
| 0.802564064 | Metabolism               |
| 2.38E-62    | Metabolism               |
| 7.66E-10    | Metabolism               |
| 1.27E-09    | Metabolism               |
| 0.985365891 | TME                      |
| 3.23E-07    | Proliferation/Metastasis |
| 0.003315848 | Metabolism               |
| 1.22E-09    | Proliferation/Metastasis |
| 0.251629475 | TME                      |
| 0.0231333   | Proliferation/Metastasis |
| 0.000412148 | Proliferation/Metastasis |
| 0.004418905 | TME                      |
| 1.25E-10    | TME                      |
| 1.19E-14    | Metabolism               |
| 8.88E-12    | Metabolism               |
| 7.71E-49    | Proliferation/Metastasis |
| 3.39E-68    | Proliferation/Metastasis |
| 0.014418123 | Proliferation/Metastasis |
| 7.40E-10    | Metabolism               |
| 0.000145419 | Metabolism               |
| 2.87E-13    | Metabolism               |

|             |                          |
|-------------|--------------------------|
| 4.51E-08    | Proliferation/Metastasis |
| 0.000192854 | TME                      |
| 0.726211002 | TME                      |
| 1.90E-08    | Metabolism               |
| 4.43E-26    | Proliferation/Metastasis |
| 5.70E-17    | Metabolism               |
| 0.562978336 | TME                      |
| 0.000106422 | TME                      |
| 0.093804571 | TME                      |
| 0.000993014 | TME                      |
| 0.01187108  | Metabolism               |
| 5.05E-06    | TME                      |
| 6.94E-07    | Proliferation/Metastasis |
| 0.373991905 | TME                      |
| 1.94E-20    | Proliferation/Metastasis |
| 2.93E-66    | Proliferation/Metastasis |
| 3.20E-11    | Metabolism               |
| 1.74E-113   | Proliferation/Metastasis |
| 0.706384347 | TME                      |
| 0.481147086 | Metabolism               |
| 7.76E-08    | TME                      |
| 0.009584849 | TME                      |
| 9.67E-05    | TME                      |
| 0.168649427 | TME                      |
| 8.63E-16    | TME                      |
| 0.945110327 | TME                      |
| 0.302020956 | Metabolism               |
| 2.47E-13    | TME                      |
| 0.202285447 | Metabolism               |
| 3.84E-18    | Metabolism               |
| 4.19E-07    | Proliferation/Metastasis |
| 5.66E-06    | Proliferation/Metastasis |
| 1.21E-72    | Metabolism               |
| 1.12E-08    | Metabolism               |
| 0.841594605 | Metabolism               |
| 9.12E-20    | Metabolism               |
| 0.043673281 | Proliferation/Metastasis |
| 1.23E-15    | Proliferation/Metastasis |
| 2.20E-06    | Metabolism               |
| 0.147856355 | Metabolism               |
| 5.37E-51    | Metabolism               |
| 9.70E-12    | TME                      |
| 0.467271509 | Metabolism               |

|             |                          |
|-------------|--------------------------|
| 0.056176978 | Metabolism               |
| 0.055134726 | Metabolism               |
| 6.71E-31    | Metabolism               |
| 4.87E-08    | Proliferation/Metastasis |
| 0.003287882 | Metabolism               |
| 1.41E-09    | Metabolism               |
| 2.94E-09    | Metabolism               |
| 1.47E-91    | Metabolism               |
| 1.35E-83    | Metabolism               |
| 1.04E-22    | Metabolism               |
| 4.29E-05    | Proliferation/Metastasis |
| 1.64E-10    | Metabolism               |
| 0.735329454 | Metabolism               |
| 2.88E-08    | Proliferation/Metastasis |
| 4.74E-13    | Metabolism               |
| 0.170558875 | Metabolism               |
| 2.19E-29    | Metabolism               |
| 0.05549281  | Metabolism               |
| 1.05E-13    | Metabolism               |
| 0.066682766 | Metabolism               |
| 5.07E-09    | Metabolism               |
| 0.446101593 | Metabolism               |
| 0.452701827 | TME                      |
| 5.50E-06    | TME                      |
| 0.728748084 | TME                      |
| 0.013499731 | TME                      |
| 9.89E-05    | TME                      |
| 1.00E-12    | Metabolism               |
| 7.74E-26    | Metabolism               |
| 1.35E-15    | Proliferation/Metastasis |
| 0.032743616 | Metabolism               |
| 7.44E-05    | Proliferation/Metastasis |
| 4.94E-12    | Metabolism               |
| 5.03E-46    | TME                      |
| 6.46E-09    | Metabolism               |
| 0.021994976 | Metabolism               |
| 0.00200144  | Metabolism               |
| 6.06E-12    | Metabolism               |
| 3.50E-09    | TME                      |
| 5.45E-25    | TME                      |
| 0.400679018 | Proliferation/Metastasis |
| 1.48E-20    | Metabolism               |
| 0.708465226 | Proliferation/Metastasis |

|             |                          |
|-------------|--------------------------|
| 2.05E-12    | Proliferation/Metastasis |
| 0.006976233 | TME                      |
| 0.913403048 | TME                      |
| 0.015487093 | TME                      |
| 0.274622117 | TME                      |
| 0.003918138 | Metabolism               |
| 0.000417541 | Proliferation/Metastasis |
| 0.502065991 | Metabolism               |
| 0.064179525 | Metabolism               |
| 8.95E-18    | Proliferation/Metastasis |
| 5.73E-15    | Proliferation/Metastasis |
| 0.046431579 | Metabolism               |
| 0.591148794 | Metabolism               |
| 0.298868023 | Metabolism               |
| 1.11E-09    | Metabolism               |
| 0.10586441  | TME                      |
| 5.36E-09    | TME                      |
| 1.63E-06    | TME                      |
| 0.538007879 | TME                      |
| 0.791133136 | TME                      |
| 1.03E-11    | Metabolism               |
| 0.001302191 | Metabolism               |
| 9.32E-10    | Metabolism               |
| 0.001775277 | Metabolism               |
| 1.09E-08    | Metabolism               |
| 5.77E-19    | TME                      |
| 2.83E-15    | TME                      |
| 0.077089808 | TME                      |
| 0.868375809 | TME                      |
| 0.063307398 | TME                      |
| 0.009177193 | TME                      |
| 0.015356421 | TME                      |
| 0.43781348  | TME                      |
| 0.296467013 | TME                      |
| 0.301960255 | Proliferation/Metastasis |
| 5.82E-17    | Proliferation/Metastasis |
| 0.997683536 | Metabolism               |
| 0.028605032 | Metabolism               |
| 0.583308534 | TME                      |
| 0.464750608 | Metabolism               |
| 1.52E-17    | Metabolism               |
| 4.96E-05    | TME                      |
| 8.40E-40    | Proliferation/Metastasis |

|             |                          |
|-------------|--------------------------|
| 1.85E-12    | Proliferation/Metastasis |
| 0.000402979 | TME                      |
| 0.000745211 | Metabolism               |
| 1.63E-10    | Metabolism               |
| 0.000672911 | Proliferation/Metastasis |
| 4.76E-15    | Proliferation/Metastasis |
| 0.000522894 | TME                      |
| 0.004588411 | TME                      |
| 0.006122067 | TME                      |
| 2.63E-07    | TME                      |
| 1.65E-10    | Proliferation/Metastasis |
| 8.47E-23    | TME                      |
| 0.000487565 | TME                      |
| 0.052028609 | Metabolism               |
| 1.27E-10    | TME                      |
| 3.92E-06    | TME                      |
| 0.792835969 | TME                      |
| 0.283589563 | TME                      |
| 1.96E-05    | Metabolism               |
| 1.12E-08    | Metabolism               |
| 0.625797072 | Metabolism               |
| 1.52E-22    | TME                      |
| 0.015313068 | Metabolism               |
| 0.00262422  | TME                      |
| 0.961475407 | TME                      |
| 0.004706511 | TME                      |
| 7.24E-11    | TME                      |
| 0.794901097 | TME                      |
| 8.21E-20    | Metabolism               |
| 0.911570607 | Proliferation/Metastasis |
| 2.05E-06    | Metabolism               |
| 2.47E-28    | Proliferation/Metastasis |
| 0.01940466  | Metabolism               |
| 0.364839923 | Metabolism               |
| 4.98E-20    | Metabolism               |
| 3.98E-09    | Metabolism               |
| 0.00458968  | Metabolism               |
| 0.065721366 | Metabolism               |
| 0.066289792 | Metabolism               |
| 0.009477173 | Metabolism               |
| 0.393171154 | Metabolism               |
| 6.26E-05    | Metabolism               |
| 1.65E-06    | Metabolism               |



|             |                          |
|-------------|--------------------------|
| 0.024216865 | Metabolism               |
| 0.179005306 | Metabolism               |
| 0.000289603 | Metabolism               |
| 3.83E-07    | TME                      |
| 2.58E-14    | Proliferation/Metastasis |
| 1.72E-05    | Metabolism               |
| 0.002509105 | Proliferation/Metastasis |
| 0.066676487 | TME                      |
| 1.21E-09    | Proliferation/Metastasis |
| 9.97E-08    | Proliferation/Metastasis |
| 1.99E-09    | TME                      |
| 0.191913351 | TME                      |
| 1.19E-22    | Metabolism               |
| 4.16E-44    | Metabolism               |
| 0.000281176 | Proliferation/Metastasis |
| 0.000274433 | Proliferation/Metastasis |
| 7.03E-29    | Proliferation/Metastasis |
| 0.000593288 | Metabolism               |
| 1.64E-06    | Metabolism               |
| 3.68E-08    | Metabolism               |
| 0.035703908 | Proliferation/Metastasis |
| 2.06E-06    | TME                      |
| 1.60E-05    | TME                      |
| 0.00621581  | Metabolism               |
| 4.04E-16    | Proliferation/Metastasis |
| 3.10E-25    | Metabolism               |
| 3.15E-06    | TME                      |
| 3.97E-06    | TME                      |
| 2.49E-05    | TME                      |
| 3.15E-20    | TME                      |
| 0.993541212 | Metabolism               |
| 8.23E-17    | TME                      |
| 2.57E-10    | Proliferation/Metastasis |
| 0.000429438 | TME                      |
| 8.36E-06    | Proliferation/Metastasis |
| 0.035357253 | Proliferation/Metastasis |
| 4.69E-53    | Metabolism               |
| 1.87E-05    | Proliferation/Metastasis |
| 9.68E-08    | TME                      |
| 5.35E-14    | Metabolism               |
| 0.045703702 | TME                      |
| 4.32E-09    | TME                      |
| 5.70E-05    | TME                      |

|             |                          |
|-------------|--------------------------|
| 0.00152421  | TME                      |
| 0.002458678 | TME                      |
| 7.54E-06    | TME                      |
| 0.000425482 | Metabolism               |
| 3.15E-07    | TME                      |
| 0.699595006 | Metabolism               |
| 1.16E-24    | Metabolism               |
| 2.69E-09    | Proliferation/Metastasis |
| 4.92E-09    | Proliferation/Metastasis |
| 0.162121738 | Metabolism               |
| 1.00E-07    | Metabolism               |
| 1.98E-08    | Metabolism               |
| 2.56E-16    | Metabolism               |
| 0.438839339 | Proliferation/Metastasis |
| 1.39E-13    | Proliferation/Metastasis |
| 0.20233994  | Metabolism               |
| 4.89E-08    | Metabolism               |
| 1.42E-06    | Metabolism               |
| 2.22E-11    | TME                      |
| 8.07E-05    | Metabolism               |
| 7.56E-06    | Metabolism               |
| 2.52E-10    | Metabolism               |
| 5.43E-24    | Metabolism               |
| 9.54E-10    | Proliferation/Metastasis |
| 0.749276567 | Metabolism               |
| 5.39E-08    | Metabolism               |
| 4.15E-17    | Metabolism               |
| 2.08E-06    | Metabolism               |
| 3.50E-25    | Metabolism               |
| 0.15108027  | Metabolism               |
| 0.748300069 | Proliferation/Metastasis |
| 1.04E-05    | Metabolism               |
| 0.093119027 | Metabolism               |
| 8.59E-62    | Proliferation/Metastasis |
| 0.000242258 | Metabolism               |
| 7.10E-50    | Metabolism               |
| 3.52E-44    | Metabolism               |
| 4.09E-09    | Metabolism               |
| 0.014503815 | Metabolism               |
| 0.000195774 | Metabolism               |
| 6.74E-05    | Metabolism               |
| 0.814966784 | Metabolism               |
| 0.000179007 | TME                      |

|             |                          |
|-------------|--------------------------|
| 0.009377645 | TME                      |
| 1.14E-05    | TME                      |
| 0.004048355 | TME                      |
| 0.16106115  | TME                      |
| 8.67E-07    | Metabolism               |
| 0.886879594 | Metabolism               |
| 4.40E-46    | Proliferation/Metastasis |
| 2.89E-05    | Metabolism               |
| 1.99E-05    | Proliferation/Metastasis |
| 0.001453833 | Metabolism               |
| 0.005394461 | TME                      |
| 0.157100841 | Metabolism               |
| 0.817044627 | Metabolism               |
| 3.46E-07    | Metabolism               |
| 6.27E-08    | Metabolism               |
| 3.38E-08    | TME                      |
| 0.00073215  | TME                      |
| 0.860114526 | Proliferation/Metastasis |
| 0.011330535 | Metabolism               |
| 1.29E-08    | Proliferation/Metastasis |
| 0.002647139 | Proliferation/Metastasis |
| 4.13E-33    | TME                      |
| 2.18E-43    | TME                      |
| 9.04E-41    | TME                      |
| 1.89E-37    | TME                      |
| 2.20E-11    | Metabolism               |
| 1.33E-41    | Proliferation/Metastasis |
| 0.37168247  | Metabolism               |
| 3.85E-36    | Metabolism               |
| 4.49E-08    | Proliferation/Metastasis |
| 3.00E-21    | Proliferation/Metastasis |
| 1.45E-20    | Metabolism               |
| 2.80E-22    | Metabolism               |
| 5.07E-06    | Metabolism               |
| 2.08E-08    | Metabolism               |
| 6.14E-27    | TME                      |
| 4.81E-12    | TME                      |
| 2.82E-25    | TME                      |
| 5.08E-24    | TME                      |
| 4.07E-87    | TME                      |
| 0.003430963 | Metabolism               |
| 3.68E-16    | Metabolism               |
| 4.99E-40    | Metabolism               |

|             |                          |
|-------------|--------------------------|
| 6.80E-21    | Metabolism               |
| 7.39E-35    | Metabolism               |
| 1.11E-42    | TME                      |
| 2.59E-20    | TME                      |
| 4.46E-74    | TME                      |
| 4.18E-20    | TME                      |
| 2.48E-43    | TME                      |
| 3.83E-27    | TME                      |
| 1.05E-30    | TME                      |
| 3.62E-33    | TME                      |
| 6.72E-23    | TME                      |
| 0.119803598 | Proliferation/Metastasis |
| 3.92E-86    | Proliferation/Metastasis |
| 0.036083987 | Metabolism               |
| 1.47E-08    | Metabolism               |
| 1.91E-31    | TME                      |
| 0.414388087 | Metabolism               |
| 2.79E-51    | Metabolism               |
| 2.61E-58    | TME                      |
| 8.31E-11    | Proliferation/Metastasis |
| 1.96E-12    | Proliferation/Metastasis |
| 6.19E-30    | TME                      |
| 0.200334403 | Metabolism               |
| 7.75E-07    | Metabolism               |
| 0.001278096 | Proliferation/Metastasis |
| 3.19E-07    | Proliferation/Metastasis |
| 7.02E-16    | TME                      |
| 3.96E-62    | TME                      |
| 7.02E-21    | TME                      |
| 1.39E-24    | TME                      |
| 0.046996149 | Proliferation/Metastasis |
| 3.35E-22    | TME                      |
| 2.38E-57    | TME                      |
| 2.57E-07    | Metabolism               |
| 4.55E-33    | TME                      |
| 1.69E-57    | TME                      |
| 2.54E-35    | TME                      |
| 0.002716834 | TME                      |
| 0.006457987 | Metabolism               |
| 9.23E-07    | Metabolism               |
| 0.001442248 | Metabolism               |
| 1.43E-14    | TME                      |
| 0.104335219 | Metabolism               |

|             |                          |
|-------------|--------------------------|
| 5.59E-28    | TME                      |
| 1.31E-26    | TME                      |
| 9.47E-45    | TME                      |
| 4.94E-48    | TME                      |
| 1.93E-21    | TME                      |
| 1.29E-13    | Metabolism               |
| 0.614067959 | Proliferation/Metastasis |
| 9.20E-92    | Metabolism               |
| 0.000448183 | Proliferation/Metastasis |
| 1.48E-26    | Metabolism               |
| 5.64E-18    | Metabolism               |
| 1.07E-08    | Metabolism               |
| 8.62E-17    | Metabolism               |
| 1.11E-18    | Metabolism               |
| 1.16E-59    | Metabolism               |
| 0.000158313 | Metabolism               |
| 2.76E-53    | Metabolism               |
| 2.11E-22    | Metabolism               |
| 1.88E-27    | Metabolism               |
| 6.66E-31    | Metabolism               |
| 3.72E-75    | Metabolism               |
| 2.97E-59    | Metabolism               |
| 0.263763475 | Metabolism               |
| 1.41E-53    | TME                      |
| 0.021618658 | Proliferation/Metastasis |
| 0.447207232 | Metabolism               |
| 6.16E-107   | Proliferation/Metastasis |
| 9.31E-22    | TME                      |
| 3.93E-68    | Proliferation/Metastasis |
| 4.00E-70    | Proliferation/Metastasis |
| 2.73E-43    | TME                      |
| 1.18E-101   | TME                      |
| 1.66E-29    | Metabolism               |
| 0.284037388 | Metabolism               |
| 6.72E-18    | Proliferation/Metastasis |
| 0.032401547 | Proliferation/Metastasis |
| 2.55E-35    | Proliferation/Metastasis |
| 0.775867592 | Metabolism               |
| 3.44E-10    | Metabolism               |
| 3.47E-10    | Metabolism               |
| 5.10E-09    | Proliferation/Metastasis |
| 3.47E-55    | TME                      |
| 3.67E-61    | TME                      |

|             |                          |
|-------------|--------------------------|
| 2.75E-07    | Metabolism               |
| 1.47E-08    | Proliferation/Metastasis |
| 0.006284062 | Metabolism               |
| 1.42E-21    | TME                      |
| 1.28E-28    | TME                      |
| 4.19E-45    | TME                      |
| 2.34E-36    | TME                      |
| 0.022476839 | Metabolism               |
| 7.26E-06    | TME                      |
| 0.000135845 | Proliferation/Metastasis |
| 2.61E-95    | TME                      |
| 3.82E-10    | Proliferation/Metastasis |
| 1.61E-14    | Proliferation/Metastasis |
| 5.22E-06    | Metabolism               |
| 1.89E-11    | Proliferation/Metastasis |
| 1.48E-39    | TME                      |
| 2.36E-06    | Metabolism               |
| 5.60E-26    | TME                      |
| 2.33E-18    | TME                      |
| 3.59E-13    | TME                      |
| 1.84E-38    | TME                      |
| 4.28E-41    | TME                      |
| 5.56E-22    | TME                      |
| 1.83E-29    | Metabolism               |
| 2.90E-115   | TME                      |
| 0.000339576 | Metabolism               |
| 2.86E-25    | Metabolism               |
| 9.02E-48    | Proliferation/Metastasis |
| 1.41E-32    | Proliferation/Metastasis |
| 6.76E-10    | Metabolism               |
| 0.00261321  | Metabolism               |
| 2.53E-16    | Metabolism               |
| 2.10E-15    | Metabolism               |
| 4.52E-60    | Proliferation/Metastasis |
| 0.00010114  | Proliferation/Metastasis |
| 0.404827178 | Metabolism               |
| 0.00254831  | Metabolism               |
| 8.29E-50    | Metabolism               |
| 6.35E-22    | TME                      |
| 5.05E-15    | Metabolism               |
| 0.329991349 | Metabolism               |
| 0.491663123 | Metabolism               |
| 5.59E-14    | Metabolism               |

|             |                          |
|-------------|--------------------------|
| 3.01E-05    | Proliferation/Metastasis |
| 0.685798479 | Metabolism               |
| 0.46111074  | Metabolism               |
| 3.85E-40    | Metabolism               |
| 6.02E-11    | Metabolism               |
| 1.08E-11    | Metabolism               |
| 0.139174149 | Metabolism               |
| 7.08E-08    | Proliferation/Metastasis |
| 0.584420616 | Metabolism               |
| 0.578617331 | Metabolism               |
| 0.143080468 | Proliferation/Metastasis |
| 4.13E-14    | Metabolism               |
| 1.28E-07    | Metabolism               |
| 2.63E-34    | Metabolism               |
| 1.24E-19    | Metabolism               |
| 0.064290366 | Metabolism               |
| 0.148351999 | Metabolism               |
| 0.096544907 | Metabolism               |
| 0.048754755 | Metabolism               |
| 1.67E-31    | TME                      |
| 9.62E-52    | TME                      |
| 2.67E-40    | TME                      |
| 1.13E-25    | TME                      |
| 3.53E-12    | TME                      |
| 0.177018393 | Metabolism               |
| 0.622659907 | Metabolism               |
| 3.40E-06    | Proliferation/Metastasis |
| 0.005486554 | Metabolism               |
| 2.98E-84    | Proliferation/Metastasis |
| 3.46E-20    | Metabolism               |
| 6.24E-66    | TME                      |
| 0.051870446 | Metabolism               |
| 8.71E-15    | Metabolism               |
| 2.14E-07    | Metabolism               |
| 4.34E-28    | Metabolism               |
| 1.16E-22    | TME                      |
| 0.621317728 | TME                      |
| 5.41E-43    | Proliferation/Metastasis |
| 7.07E-08    | Metabolism               |
| 0.002495752 | Proliferation/Metastasis |
| 4.88E-29    | Proliferation/Metastasis |
| 0.001602841 | TME                      |
| 2.57E-06    | TME                      |

|             |                          |
|-------------|--------------------------|
| 4.46E-07    | TME                      |
| 1.80E-06    | TME                      |
| 0.001525338 | Metabolism               |
| 2.68E-14    | Proliferation/Metastasis |
| 0.598015118 | Metabolism               |
| 1.88E-13    | Metabolism               |
| 0.162190536 | Proliferation/Metastasis |
| 0.002136845 | Proliferation/Metastasis |
| 0.166542788 | Metabolism               |
| 1.08E-06    | Metabolism               |
| 0.727144261 | Metabolism               |
| 0.071339012 | Metabolism               |
| 0.003701769 | TME                      |
| 0.206315325 | TME                      |
| 7.71E-05    | TME                      |
| 0.000832633 | TME                      |
| 0.163705786 | TME                      |
| 0.01226858  | Metabolism               |
| 0.008888557 | Metabolism               |
| 0.285760484 | Metabolism               |
| 0.466525741 | Metabolism               |
| 0.007562841 | Metabolism               |
| 9.23E-05    | TME                      |
| 0.346754806 | TME                      |
| 6.25E-05    | TME                      |
| 0.002741592 | TME                      |
| 2.24E-08    | TME                      |
| 5.36E-05    | TME                      |
| 8.67E-06    | TME                      |
| 0.000120779 | TME                      |
| 3.41E-05    | TME                      |
| 4.46E-07    | Proliferation/Metastasis |
| 0.001316854 | Proliferation/Metastasis |
| 2.79E-09    | Metabolism               |
| 5.61E-08    | Metabolism               |
| 0.002067492 | TME                      |
| 0.671744681 | Metabolism               |
| 0.062442129 | Metabolism               |
| 1.54E-05    | TME                      |
| 0.000325732 | Proliferation/Metastasis |
| 1.10E-08    | Proliferation/Metastasis |
| 0.006046439 | TME                      |
| 0.002119929 | Metabolism               |



|             |                          |
|-------------|--------------------------|
| 0.586453028 | Metabolism               |
| 2.79E-09    | Proliferation/Metastasis |
| 0.092964603 | Proliferation/Metastasis |
| 0.000329287 | TME                      |
| 1.92E-07    | TME                      |
| 0.000803181 | TME                      |
| 2.66E-07    | TME                      |
| 3.41E-16    | Proliferation/Metastasis |
| 0.001380881 | TME                      |
| 7.64E-09    | TME                      |
| 0.109417139 | Metabolism               |
| 4.94E-07    | TME                      |
| 2.33E-07    | TME                      |
| 1.67E-05    | TME                      |
| 0.153672683 | TME                      |
| 0.018419587 | Metabolism               |
| 0.33239918  | Metabolism               |
| 0.239465819 | Metabolism               |
| 0.013710921 | TME                      |
| 0.911461923 | Metabolism               |
| 0.000377781 | TME                      |
| 0.000261538 | TME                      |
| 2.91E-06    | TME                      |
| 0.000171208 | TME                      |
| 9.86E-06    | TME                      |
| 2.41E-06    | Metabolism               |
| 9.66E-11    | Proliferation/Metastasis |
| 1.85E-07    | Metabolism               |
| 0.270806585 | Proliferation/Metastasis |
| 0.02272381  | Metabolism               |
| 0.100496276 | Metabolism               |
| 0.015019174 | Metabolism               |
| 0.447651958 | Metabolism               |
| 1.21E-07    | Metabolism               |
| 0.056044843 | Metabolism               |
| 0.050159539 | Metabolism               |
| 0.000502567 | Metabolism               |
| 0.1611498   | Metabolism               |
| 3.61E-05    | Metabolism               |
| 0.000732752 | Metabolism               |
| 8.59E-05    | Metabolism               |
| 0.019768354 | Metabolism               |
| 0.019212342 | Metabolism               |

|             |                          |
|-------------|--------------------------|
| 4.44E-07    | TME                      |
| 0.023143451 | Proliferation/Metastasis |
| 0.000558735 | Metabolism               |
| 4.57E-06    | Proliferation/Metastasis |
| 0.000326364 | TME                      |
| 5.30E-08    | Proliferation/Metastasis |
| 1.87E-08    | Proliferation/Metastasis |
| 0.000112765 | TME                      |
| 0.000129391 | TME                      |
| 0.874698097 | Metabolism               |
| 0.001682094 | Metabolism               |
| 8.48E-19    | Proliferation/Metastasis |
| 1.55E-11    | Proliferation/Metastasis |
| 0.000541943 | Proliferation/Metastasis |
| 5.06E-06    | Metabolism               |
| 4.90E-08    | Metabolism               |
| 8.37E-05    | Metabolism               |
| 0.000316717 | Proliferation/Metastasis |
| 3.08E-08    | TME                      |
| 2.55E-07    | TME                      |
| 0.850860702 | Metabolism               |
| 0.023381656 | Proliferation/Metastasis |
| 0.005122194 | Metabolism               |
| 8.73E-05    | TME                      |
| 8.86E-05    | TME                      |
| 0.003697854 | TME                      |
| 0.001266322 | TME                      |
| 0.1308898   | Metabolism               |
| 1.16E-06    | TME                      |
| 4.29E-08    | Proliferation/Metastasis |
| 1.23E-05    | TME                      |
| 0.528970623 | Proliferation/Metastasis |
| 1.26E-17    | Proliferation/Metastasis |
| 0.003883952 | Metabolism               |
| 1.15E-10    | Proliferation/Metastasis |
| 1.88E-06    | TME                      |
| 1.12E-09    | Metabolism               |
| 0.006171259 | TME                      |
| 0.148318898 | TME                      |
| 0.887829208 | TME                      |
| 1.39E-05    | TME                      |
| 5.39E-08    | TME                      |
| 7.54E-05    | TME                      |

|             |                          |
|-------------|--------------------------|
| 1.76E-06    | Metabolism               |
| 1.25E-06    | TME                      |
| 0.625528171 | Metabolism               |
| 7.04E-05    | Metabolism               |
| 2.26E-08    | Proliferation/Metastasis |
| 0.036050224 | Proliferation/Metastasis |
| 3.21E-09    | Metabolism               |
| 0.799734843 | Metabolism               |
| 0.602786719 | Metabolism               |
| 0.173440744 | Metabolism               |
| 0.10803938  | Proliferation/Metastasis |
| 3.59E-10    | Proliferation/Metastasis |
| 0.002432182 | Metabolism               |
| 0.003167752 | Metabolism               |
| 5.09E-09    | Metabolism               |
| 0.148039503 | TME                      |
| 0.242386066 | Metabolism               |
| 0.051619396 | Metabolism               |
| 0.498517653 | Metabolism               |
| 0.185469455 | Metabolism               |
| 9.92E-19    | Proliferation/Metastasis |
| 3.95E-05    | Metabolism               |
| 0.282637054 | Metabolism               |
| 0.451225564 | Metabolism               |
| 6.97E-10    | Metabolism               |
| 7.56E-06    | Metabolism               |
| 0.000112724 | Metabolism               |
| 0.509255962 | Proliferation/Metastasis |
| 0.244655977 | Metabolism               |
| 0.037611724 | Metabolism               |
| 0.732751037 | Proliferation/Metastasis |
| 0.045223649 | Metabolism               |
| 0.047014174 | Metabolism               |
| 0.074008165 | Metabolism               |
| 0.019151413 | Metabolism               |
| 0.000192341 | Metabolism               |
| 0.97590502  | Metabolism               |
| 0.891501935 | Metabolism               |
| 0.118101453 | Metabolism               |
| 0.000303206 | TME                      |
| 9.28E-07    | TME                      |
| 0.000234844 | TME                      |
| 0.005338621 | TME                      |

|             |                          |
|-------------|--------------------------|
| 0.005562281 | TME                      |
| 0.000214815 | Metabolism               |
| 1.49E-07    | Metabolism               |
| 0.281389776 | Proliferation/Metastasis |
| 0.540995247 | Metabolism               |
| 0.000377747 | Proliferation/Metastasis |
| 1.17E-06    | Metabolism               |
| 0.073529185 | TME                      |
| 0.090778706 | Metabolism               |
| 0.702818686 | Metabolism               |
| 0.000725421 | Metabolism               |
| 0.837310079 | Metabolism               |
| 0.467137271 | TME                      |
| 0.021623582 | TME                      |
| 3.68E-06    | Proliferation/Metastasis |
| 0.01870452  | Metabolism               |
| 0.264367196 | Proliferation/Metastasis |
| 0.985855063 | Proliferation/Metastasis |
| 0.784762505 | TME                      |
| 0.951239098 | TME                      |
| 0.561756601 | TME                      |
| 0.992278791 | TME                      |
| 0.037481705 | Metabolism               |
| 0.02950481  | Proliferation/Metastasis |
| 0.167553326 | Metabolism               |
| 0.00444806  | Metabolism               |
| 0.000806508 | Proliferation/Metastasis |
| 1.17E-14    | Proliferation/Metastasis |
| 0.00564727  | Metabolism               |
| 0.876619868 | Metabolism               |
| 0.981617928 | Metabolism               |
| 0.000871557 | Metabolism               |
| 0.218045493 | TME                      |
| 0.004474775 | TME                      |
| 0.176237936 | TME                      |
| 0.253188145 | TME                      |
| 3.57E-05    | TME                      |
| 0.703627478 | Metabolism               |
| 0.2353991   | Metabolism               |
| 8.76E-06    | Metabolism               |
| 7.63E-06    | Metabolism               |
| 0.017356933 | Metabolism               |
| 1.22E-06    | TME                      |

|             |                          |
|-------------|--------------------------|
| 0.055036498 | TME                      |
| 0.02811095  | TME                      |
| 0.688186592 | TME                      |
| 0.207801388 | TME                      |
| 0.536344631 | TME                      |
| 0.497344754 | TME                      |
| 0.351197443 | TME                      |
| 0.917107075 | TME                      |
| 0.011670356 | Proliferation/Metastasis |
| 0.182841434 | Proliferation/Metastasis |
| 0.457397454 | Metabolism               |
| 0.000368868 | Metabolism               |
| 0.995969689 | TME                      |
| 0.685655397 | Metabolism               |
| 0.973297781 | Metabolism               |
| 0.000994265 | TME                      |
| 0.935760271 | Proliferation/Metastasis |
| 0.000288642 | Proliferation/Metastasis |
| 0.59548694  | TME                      |
| 0.041208444 | Metabolism               |
| 0.036189001 | Metabolism               |
| 1.51E-05    | Proliferation/Metastasis |
| 4.99E-10    | Proliferation/Metastasis |
| 0.735423838 | TME                      |
| 0.000427683 | TME                      |
| 0.798934306 | TME                      |
| 0.215810816 | TME                      |
| 0.101987193 | Proliferation/Metastasis |
| 0.009797441 | TME                      |
| 0.068446024 | TME                      |
| 0.001250018 | Metabolism               |
| 0.203032449 | TME                      |
| 0.120932905 | TME                      |
| 0.743876411 | TME                      |
| 0.000437969 | TME                      |
| 0.945441607 | Metabolism               |
| 2.84E-05    | Metabolism               |
| 0.006519419 | Metabolism               |
| 1.91E-06    | TME                      |
| 0.015047535 | Metabolism               |
| 0.920526496 | TME                      |
| 0.421747214 | TME                      |
| 0.109167208 | TME                      |

|             |                          |
|-------------|--------------------------|
| 0.648868265 | TME                      |
| 0.651771438 | TME                      |
| 0.000987808 | Metabolism               |
| 0.00098112  | Proliferation/Metastasis |
| 3.93E-06    | Metabolism               |
| 0.001878323 | Proliferation/Metastasis |
| 0.131249255 | Metabolism               |
| 0.218383307 | Metabolism               |
| 0.019556898 | Metabolism               |
| 0.203310457 | Metabolism               |
| 0.167327803 | Metabolism               |
| 7.61E-09    | Metabolism               |
| 0.04637454  | Metabolism               |
| 0.059604627 | Metabolism               |
| 0.049419109 | Metabolism               |
| 0.162267596 | Metabolism               |
| 0.000128199 | Metabolism               |
| 0.229996054 | Metabolism               |
| 0.006465464 | Metabolism               |
| 0.000636585 | Metabolism               |
| 0.037846289 | TME                      |
| 0.227394174 | Proliferation/Metastasis |
| 0.046562355 | Metabolism               |
| 5.06E-10    | Proliferation/Metastasis |
| 0.449066533 | TME                      |
| 2.45E-07    | Proliferation/Metastasis |
| 5.18E-05    | Proliferation/Metastasis |
| 0.002075975 | TME                      |
| 5.30E-06    | TME                      |
| 0.002952826 | Metabolism               |
| 0.268306461 | Metabolism               |
| 0.934896971 | Proliferation/Metastasis |
| 0.596777973 | Proliferation/Metastasis |
| 3.75E-09    | Proliferation/Metastasis |
| 0.510214712 | Metabolism               |
| 0.029707311 | Metabolism               |
| 1.27E-10    | Metabolism               |
| 0.005138246 | Proliferation/Metastasis |
| 0.018078364 | TME                      |
| 5.81E-05    | TME                      |
| 0.675184838 | Metabolism               |
| 0.001212381 | Proliferation/Metastasis |
| 0.32386506  | Metabolism               |

|             |                          |
|-------------|--------------------------|
| 0.520579419 | TME                      |
| 0.234360532 | TME                      |
| 1.34E-08    | TME                      |
| 2.32E-05    | TME                      |
| 0.026500279 | Metabolism               |
| 0.08804242  | TME                      |
| 0.18001448  | Proliferation/Metastasis |
| 6.54E-07    | TME                      |
| 0.120285907 | Proliferation/Metastasis |
| 0.154524169 | Proliferation/Metastasis |
| 0.010657882 | Metabolism               |
| 0.170589025 | Proliferation/Metastasis |
| 0.144692898 | TME                      |
| 0.563504745 | Metabolism               |
| 0.821826245 | TME                      |
| 0.885962097 | TME                      |
| 0.562197287 | TME                      |
| 0.106645602 | TME                      |
| 0.125602899 | TME                      |
| 0.338682368 | TME                      |
| 2.06E-09    | Metabolism               |
| 1.03E-16    | TME                      |
| 0.008029926 | Metabolism               |
| 0.427167492 | Metabolism               |
| 3.94E-05    | Proliferation/Metastasis |
| 1.44E-05    | Proliferation/Metastasis |
| 0.013177104 | Metabolism               |
| 0.702493804 | Metabolism               |
| 0.514354219 | Metabolism               |
| 0.229094121 | Metabolism               |
| 1.95E-06    | Proliferation/Metastasis |
| 0.719035134 | Proliferation/Metastasis |
| 0.891730953 | Metabolism               |
| 0.009136216 | Metabolism               |
| 0.171676683 | Metabolism               |
| 4.27E-08    | TME                      |
| 0.000122367 | Metabolism               |
| 0.762037562 | Metabolism               |
| 0.286488091 | Metabolism               |
| 0.174126212 | Metabolism               |
| 0.089922525 | Proliferation/Metastasis |
| 0.33368522  | Metabolism               |
| 0.606234323 | Metabolism               |

|             |                          |
|-------------|--------------------------|
| 1.24E-07    | Metabolism               |
| 0.160787071 | Metabolism               |
| 0.477621937 | Metabolism               |
| 0.002936124 | Metabolism               |
| 7.18E-06    | Proliferation/Metastasis |
| 0.633371263 | Metabolism               |
| 0.877501898 | Metabolism               |
| 0.839588732 | Proliferation/Metastasis |
| 1.87E-07    | Metabolism               |
| 0.43681973  | Metabolism               |
| 0.843439033 | Metabolism               |
| 0.006093845 | Metabolism               |
| 0.253673335 | Metabolism               |
| 0.243180458 | Metabolism               |
| 0.309281719 | Metabolism               |
| 0.109195079 | Metabolism               |
| 0.268769666 | TME                      |
| 0.024464772 | TME                      |
| 1.39E-05    | TME                      |
| 0.039034437 | TME                      |
| 0.131605161 | TME                      |
| 0.000344491 | Metabolism               |
| 0.248691857 | Metabolism               |
| 0.014795839 | Proliferation/Metastasis |
| 0.089836807 | Metabolism               |
| 6.19E-07    | Proliferation/Metastasis |
| 0.006038581 | Metabolism               |
| 6.26E-08    | TME                      |
| 0.117757981 | Metabolism               |
| 0.052762567 | Metabolism               |
| 0.021607234 | Metabolism               |
| 2.06E-06    | Metabolism               |
| 0.001488001 | TME                      |
| 0.078439473 | TME                      |
| 0.057900014 | Proliferation/Metastasis |
| 0.312972146 | Metabolism               |
| 0.003204016 | Proliferation/Metastasis |
| 0.084816629 | Proliferation/Metastasis |
| 0.290201663 | TME                      |
| 0.001191123 | TME                      |
| 0.040723174 | TME                      |
| 0.000843426 | TME                      |
| 0.104649572 | Metabolism               |



|             |                          |
|-------------|--------------------------|
| 4.31E-06    | Proliferation/Metastasis |
| 0.223289194 | Metabolism               |
| 0.14935947  | Metabolism               |
| 0.117008812 | Proliferation/Metastasis |
| 0.000320396 | Proliferation/Metastasis |
| 0.010097324 | Metabolism               |
| 0.034916385 | Metabolism               |
| 0.03306915  | Metabolism               |
| 0.295265322 | Metabolism               |
| 0.89886194  | TME                      |
| 0.473766574 | TME                      |
| 0.098830776 | TME                      |
| 0.006659006 | TME                      |
| 0.76393432  | TME                      |
| 0.09697276  | Metabolism               |
| 0.247365007 | Metabolism               |
| 0.160568355 | Metabolism               |
| 4.14E-05    | Metabolism               |
| 0.031228859 | Metabolism               |
| 2.46E-05    | TME                      |
| 0.045155162 | TME                      |
| 0.00153196  | TME                      |
| 0.121187169 | TME                      |
| 0.021017396 | TME                      |
| 0.003370112 | TME                      |
| 0.004715018 | TME                      |
| 0.000159268 | TME                      |
| 0.006830019 | TME                      |
| 0.000438433 | Proliferation/Metastasis |
| 7.01E-07    | Proliferation/Metastasis |
| 0.479706284 | Metabolism               |
| 0.639405272 | Metabolism               |
| 3.12E-06    | TME                      |
| 0.012899007 | Metabolism               |
| 6.44E-05    | Metabolism               |
| 0.215294804 | TME                      |
| 9.99E-10    | Proliferation/Metastasis |
| 0.002474505 | Proliferation/Metastasis |
| 1.20E-05    | TME                      |
| 0.086407994 | Metabolism               |
| 0.000150949 | Metabolism               |
| 0.045266254 | Proliferation/Metastasis |
| 1.99E-06    | Proliferation/Metastasis |

|             |                          |
|-------------|--------------------------|
| 0.85131624  | TME                      |
| 0.37367695  | TME                      |
| 0.109232032 | TME                      |
| 0.117353797 | TME                      |
| 1.53E-08    | Proliferation/Metastasis |
| 0.047140458 | TME                      |
| 0.030960086 | TME                      |
| 0.554056616 | Metabolism               |
| 0.121123408 | TME                      |
| 0.064719783 | TME                      |
| 4.73E-05    | TME                      |
| 0.214606781 | TME                      |
| 0.206763301 | Metabolism               |
| 0.002852467 | Metabolism               |
| 0.522986673 | Metabolism               |
| 0.014889156 | TME                      |
| 0.000237502 | Metabolism               |
| 0.115474675 | TME                      |
| 0.701522866 | TME                      |
| 0.046467549 | TME                      |
| 0.000247969 | TME                      |
| 0.024682695 | TME                      |
| 0.614907529 | Metabolism               |
| 1.14E-07    | Proliferation/Metastasis |
| 0.308389481 | Metabolism               |
| 0.00076541  | Proliferation/Metastasis |
| 0.000488268 | Metabolism               |
| 0.550810846 | Metabolism               |
| 0.014228217 | Metabolism               |
| 6.91E-07    | Metabolism               |
| 0.868048027 | Metabolism               |
| 0.832128128 | Metabolism               |
| 0.02311184  | Metabolism               |
| 0.00821858  | Metabolism               |
| 0.155204559 | Metabolism               |
| 0.05783475  | Metabolism               |
| 0.024563769 | Metabolism               |
| 0.021141647 | Metabolism               |
| 0.000635857 | Metabolism               |
| 5.60E-05    | Metabolism               |
| 0.228740209 | TME                      |
| 7.27E-07    | Proliferation/Metastasis |
| 0.149438408 | Metabolism               |

|             |                          |
|-------------|--------------------------|
| 0.043270385 | Proliferation/Metastasis |
| 0.002266031 | TME                      |
| 0.318161618 | Proliferation/Metastasis |
| 0.230912906 | Proliferation/Metastasis |
| 0.155909786 | TME                      |
| 0.670141087 | TME                      |
| 1.01E-05    | Metabolism               |
| 3.67E-08    | Metabolism               |
| 0.079573536 | Proliferation/Metastasis |
| 0.265594664 | Proliferation/Metastasis |
| 0.004311817 | Proliferation/Metastasis |
| 0.342482709 | Metabolism               |
| 1.72E-05    | Metabolism               |
| 0.415214855 | Metabolism               |
| 0.001711551 | Proliferation/Metastasis |
| 0.35735369  | TME                      |
| 0.351683953 | TME                      |
| 0.385531008 | Metabolism               |
| 2.46E-07    | Proliferation/Metastasis |
| 1.72E-09    | Metabolism               |
| 0.353514834 | TME                      |
| 8.24E-05    | TME                      |
| 0.116794166 | TME                      |
| 0.019773668 | TME                      |
| 0.011986392 | Metabolism               |
| 0.011995904 | TME                      |
| 1.28E-15    | Proliferation/Metastasis |
| 0.502484522 | TME                      |
| 0.008677225 | Proliferation/Metastasis |
| 0.050486689 | Proliferation/Metastasis |
| 9.31E-10    | Metabolism               |
| 0.311207603 | Proliferation/Metastasis |
| 0.15328802  | TME                      |
| 0.53468089  | Metabolism               |
| 0.017309224 | TME                      |
| 0.802433457 | TME                      |
| 0.2928827   | TME                      |
| 0.004865075 | TME                      |
| 0.000158779 | TME                      |
| 0.463411556 | TME                      |
| 0.038399032 | Metabolism               |
| 0.050610496 | TME                      |
| 0.864175084 | Metabolism               |

|             |                          |
|-------------|--------------------------|
| 0.015072471 | Metabolism               |
| 0.005695717 | Proliferation/Metastasis |
| 0.017673348 | Proliferation/Metastasis |
| 0.620365137 | Metabolism               |
| 0.01665019  | Metabolism               |
| 0.175354372 | Metabolism               |
| 1.88E-12    | Metabolism               |
| 0.56549969  | Proliferation/Metastasis |
| 0.000424304 | Proliferation/Metastasis |
| 0.088499232 | Metabolism               |
| 0.245496783 | Metabolism               |
| 0.036983211 | Metabolism               |
| 0.015665755 | TME                      |
| 0.717182357 | Metabolism               |
| 0.218690362 | Metabolism               |
| 0.994606998 | Metabolism               |
| 1.09E-05    | Metabolism               |
| 0.023513455 | Proliferation/Metastasis |
| 3.95E-05    | Metabolism               |
| 0.207191288 | Metabolism               |
| 0.7461516   | Metabolism               |
| 0.098495292 | Metabolism               |
| 0.004670283 | Metabolism               |
| 0.003936751 | Metabolism               |
| 0.002038803 | Proliferation/Metastasis |
| 0.518252691 | Metabolism               |
| 0.000196786 | Metabolism               |
| 5.22E-07    | Proliferation/Metastasis |
| 0.515503667 | Metabolism               |
| 1.21E-15    | Metabolism               |
| 0.000193792 | Metabolism               |
| 0.745480268 | Metabolism               |
| 0.941080694 | Metabolism               |
| 0.565222307 | Metabolism               |
| 0.30461081  | Metabolism               |
| 0.032975592 | Metabolism               |
| 0.044039002 | TME                      |
| 0.009579047 | TME                      |
| 0.727037941 | TME                      |
| 0.018525759 | TME                      |
| 0.002551034 | TME                      |
| 0.009022788 | Metabolism               |
| 0.799215896 | Metabolism               |

|             |                          |
|-------------|--------------------------|
| 2.74E-12    | Proliferation/Metastasis |
| 9.71E-05    | Metabolism               |
| 0.011803981 | Proliferation/Metastasis |
| 7.71E-10    | Metabolism               |
| 0.386490905 | TME                      |
| 0.029522256 | Metabolism               |
| 0.000136332 | Metabolism               |
| 0.000468965 | Metabolism               |
| 0.013431641 | Metabolism               |
| 0.430289513 | TME                      |
| 0.125992693 | TME                      |
| 0.001538515 | Proliferation/Metastasis |
| 1.03E-06    | Metabolism               |
| 0.487150386 | Proliferation/Metastasis |
| 0.000572831 | Proliferation/Metastasis |
| 0.484750615 | TME                      |
| 0.13534018  | TME                      |
| 0.386608722 | TME                      |
| 0.911124747 | TME                      |
| 0.026993012 | Metabolism               |
| 4.52E-08    | Proliferation/Metastasis |
| 0.938376175 | Metabolism               |
| 0.054269123 | Metabolism               |
| 0.362553776 | Proliferation/Metastasis |
| 0.321259196 | Proliferation/Metastasis |
| 0.41021333  | Metabolism               |
| 0.003391592 | Metabolism               |
| 0.168634501 | Metabolism               |
| 0.898925386 | Metabolism               |
| 0.572176993 | TME                      |
| 0.077714561 | TME                      |
| 0.001112068 | TME                      |
| 0.96153286  | TME                      |
| 1.32E-07    | TME                      |
| 0.574046766 | Metabolism               |
| 0.730347221 | Metabolism               |
| 0.281144586 | Metabolism               |
| 0.138884513 | Metabolism               |
| 0.015666886 | Metabolism               |
| 0.856071829 | TME                      |
| 2.69E-08    | TME                      |
| 0.742585995 | TME                      |
| 0.945813358 | TME                      |

|             |                          |
|-------------|--------------------------|
| 0.170041759 | TME                      |
| 0.928782669 | TME                      |
| 0.729099041 | TME                      |
| 0.27781994  | TME                      |
| 0.710940464 | TME                      |
| 0.00017785  | Proliferation/Metastasis |
| 2.49E-05    | Proliferation/Metastasis |
| 0.0001187   | Metabolism               |
| 0.029464443 | Metabolism               |
| 0.707712194 | TME                      |
| 0.527191651 | Metabolism               |
| 0.032856245 | Metabolism               |
| 0.025649277 | TME                      |
| 3.92E-08    | Proliferation/Metastasis |
| 0.015285338 | Proliferation/Metastasis |
| 0.730491524 | TME                      |
| 0.86379064  | Metabolism               |
| 8.92E-12    | Metabolism               |
| 0.002499154 | Proliferation/Metastasis |
| 0.345120779 | Proliferation/Metastasis |
| 0.680544258 | TME                      |
| 0.252079832 | TME                      |
| 0.905676534 | TME                      |
| 0.700602479 | TME                      |
| 3.62E-13    | Proliferation/Metastasis |
| 0.042444265 | TME                      |
| 0.39349278  | TME                      |
| 0.461456347 | Metabolism               |
| 0.826138305 | TME                      |
| 0.606228149 | TME                      |
| 0.522905298 | TME                      |
| 0.397286012 | TME                      |
| 0.250699609 | Metabolism               |
| 0.043907106 | Metabolism               |
| 1.03E-06    | Metabolism               |
| 0.662719389 | TME                      |
| 8.73E-05    | Metabolism               |
| 0.926540956 | TME                      |
| 0.113714741 | TME                      |
| 0.056189201 | TME                      |
| 0.554211532 | TME                      |
| 0.269945327 | TME                      |
| 0.000899167 | Metabolism               |

|             |                          |
|-------------|--------------------------|
| 0.002971763 | Proliferation/Metastasis |
| 1.52E-05    | Metabolism               |
| 3.98E-05    | Proliferation/Metastasis |
| 0.023893761 | Metabolism               |
| 0.235613171 | Metabolism               |
| 0.958358663 | Metabolism               |
| 0.738193438 | Metabolism               |
| 0.001344854 | Metabolism               |
| 0.128403792 | Metabolism               |
| 0.733061733 | Metabolism               |
| 0.026323619 | Metabolism               |
| 0.006442992 | Metabolism               |
| 0.000517042 | Metabolism               |
| 0.000108668 | Metabolism               |
| 0.013299331 | Metabolism               |
| 0.287448491 | Metabolism               |
| 0.094768162 | Metabolism               |
| 0.48570911  | TME                      |
| 0.083642929 | Proliferation/Metastasis |
| 0.52807032  | Metabolism               |
| 0.001227338 | Proliferation/Metastasis |
| 0.99429322  | TME                      |
| 0.017535286 | Proliferation/Metastasis |
| 0.089126251 | Proliferation/Metastasis |
| 0.44384489  | TME                      |
| 0.044400678 | TME                      |
| 0.00016184  | Metabolism               |
| 0.374259079 | Metabolism               |
| 0.105874332 | Proliferation/Metastasis |
| 6.74E-20    | Proliferation/Metastasis |
| 0.473559982 | Proliferation/Metastasis |
| 0.375815363 | Metabolism               |
| 0.414684635 | Metabolism               |
| 0.988364209 | Metabolism               |
| 0.03160657  | Proliferation/Metastasis |
| 0.006556725 | TME                      |
| 0.000546324 | TME                      |
| 0.962459203 | Metabolism               |
| 0.31962322  | Proliferation/Metastasis |
| 0.529799517 | Metabolism               |
| 0.761739081 | TME                      |
| 0.407807378 | TME                      |
| 0.428998607 | TME                      |

|             |                          |
|-------------|--------------------------|
| 0.158093823 | TME                      |
| 0.53717487  | Metabolism               |
| 0.001153803 | TME                      |
| 0.078374087 | Proliferation/Metastasis |
| 0.114739277 | TME                      |
| 0.274232798 | Proliferation/Metastasis |
| 8.00E-16    | Proliferation/Metastasis |
| 1.04E-06    | Metabolism               |
| 9.48E-25    | Proliferation/Metastasis |
| 0.45259111  | TME                      |
| 0.020374144 | Metabolism               |
| 0.422508985 | TME                      |
| 0.257985245 | TME                      |
| 0.059926679 | TME                      |
| 0.311097189 | TME                      |
| 0.001856107 | TME                      |
| 0.603156138 | TME                      |
| 1.16E-05    | Metabolism               |
| 0.017650109 | TME                      |
| 0.018342481 | Metabolism               |
| 0.82119108  | Metabolism               |
| 0.000231799 | Proliferation/Metastasis |
| 0.013029787 | Proliferation/Metastasis |
| 0.010642102 | Metabolism               |
| 1.57E-08    | Metabolism               |
| 0.002762218 | Metabolism               |
| 1.38E-06    | Metabolism               |
| 2.27E-05    | Proliferation/Metastasis |
| 0.12932987  | Proliferation/Metastasis |
| 0.466394151 | Metabolism               |
| 0.567432033 | Metabolism               |
| 0.000103167 | Metabolism               |
| 0.106890664 | TME                      |
| 0.000133146 | Metabolism               |
| 0.000822501 | Metabolism               |
| 0.007714091 | Metabolism               |
| 0.458531514 | Metabolism               |
| 1.83E-05    | Proliferation/Metastasis |
| 5.23E-05    | Metabolism               |
| 0.414840008 | Metabolism               |
| 0.048230249 | Metabolism               |
| 1.97E-13    | Metabolism               |
| 1.64E-17    | Metabolism               |



|             |                          |
|-------------|--------------------------|
| 0.00267845  | Metabolism               |
| 0.554948493 | Proliferation/Metastasis |
| 0.551271727 | Metabolism               |
| 0.947202654 | Metabolism               |
| 0.335758065 | Proliferation/Metastasis |
| 0.250964705 | Metabolism               |
| 0.182151749 | Metabolism               |
| 3.53E-07    | Metabolism               |
| 0.226975304 | Metabolism               |
| 8.40E-07    | Metabolism               |
| 0.011185197 | Metabolism               |
| 0.091476673 | Metabolism               |
| 0.65415926  | Metabolism               |
| 0.360040403 | TME                      |
| 0.125501158 | TME                      |
| 0.047335684 | TME                      |
| 0.355244103 | TME                      |
| 0.71744201  | TME                      |
| 3.93E-05    | Metabolism               |
| 1.34E-07    | Metabolism               |
| 0.564184334 | Proliferation/Metastasis |
| 0.106018339 | Metabolism               |
| 0.004888166 | Proliferation/Metastasis |
| 0.660733814 | Metabolism               |
| 1.63E-05    | TME                      |
| 0.265668767 | Metabolism               |
| 0.286045632 | Metabolism               |
| 0.213835067 | Metabolism               |
| 0.139079027 | Metabolism               |
| 0.709180909 | TME                      |
| 0.314845404 | TME                      |
| 0.033310519 | Proliferation/Metastasis |
| 0.133960192 | Metabolism               |
| 0.018702853 | Proliferation/Metastasis |
| 0.219246232 | Proliferation/Metastasis |
| 0.790379767 | TME                      |
| 0.460297346 | TME                      |
| 0.649457422 | TME                      |
| 0.726439578 | TME                      |
| 0.053451279 | Metabolism               |
| 0.000843731 | Proliferation/Metastasis |
| 0.374954187 | Metabolism               |
| 0.610298939 | Metabolism               |

|             |                          |
|-------------|--------------------------|
| 0.008565775 | Proliferation/Metastasis |
| 0.107248712 | Proliferation/Metastasis |
| 0.011166887 | Metabolism               |
| 0.098235761 | Metabolism               |
| 0.469613325 | Metabolism               |
| 0.058353745 | Metabolism               |
| 0.952888644 | TME                      |
| 0.00420901  | TME                      |
| 0.786537217 | TME                      |
| 0.373767511 | TME                      |
| 7.04E-06    | TME                      |
| 0.156685094 | Metabolism               |
| 0.302437241 | Metabolism               |
| 0.147902386 | Metabolism               |
| 0.003831567 | Metabolism               |
| 8.40E-05    | Metabolism               |
| 9.19E-05    | TME                      |
| 0.240031625 | TME                      |
| 0.286902741 | TME                      |
| 0.468282541 | TME                      |
| 0.628599395 | TME                      |
| 0.933330866 | TME                      |
| 0.898666312 | TME                      |
| 0.694234983 | TME                      |
| 0.876800055 | TME                      |
| 0.005098751 | Proliferation/Metastasis |
| 0.674159694 | Proliferation/Metastasis |
| 0.001522914 | Metabolism               |
| 0.142484636 | Metabolism               |
| 0.128750233 | TME                      |
| 0.00194211  | Metabolism               |
| 0.000996272 | Metabolism               |
| 0.079261096 | TME                      |
| 7.64E-08    | Proliferation/Metastasis |
| 0.448339681 | Proliferation/Metastasis |
| 0.00244636  | TME                      |
| 0.002688819 | Metabolism               |
| 0.071168704 | Metabolism               |
| 0.519977294 | Proliferation/Metastasis |
| 0.071968158 | Proliferation/Metastasis |
| 0.105231847 | TME                      |
| 0.032149011 | TME                      |
| 0.479117574 | TME                      |

|             |                          |
|-------------|--------------------------|
| 0.32934967  | TME                      |
| 0.016676778 | Proliferation/Metastasis |
| 0.037111029 | TME                      |
| 0.181392961 | TME                      |
| 0.007046861 | Metabolism               |
| 0.008208975 | TME                      |
| 0.008917737 | TME                      |
| 0.414112897 | TME                      |
| 0.000402795 | TME                      |
| 0.015360594 | Metabolism               |
| 0.356137354 | Metabolism               |
| 0.015204205 | Metabolism               |
| 0.012185203 | TME                      |
| 0.765969168 | Metabolism               |
| 0.235668379 | TME                      |
| 0.854852674 | TME                      |
| 0.337431529 | TME                      |
| 0.085729276 | TME                      |
| 0.799507456 | TME                      |
| 0.00740869  | Metabolism               |
| 0.001844533 | Proliferation/Metastasis |
| 0.665396475 | Metabolism               |
| 6.12E-05    | Proliferation/Metastasis |
| 0.301807011 | Metabolism               |
| 0.237733975 | Metabolism               |
| 0.002661644 | Metabolism               |
| 0.002810163 | Metabolism               |
| 0.491744694 | Metabolism               |
| 0.472910283 | Metabolism               |
| 0.094929773 | Metabolism               |
| 0.311823388 | Metabolism               |
| 0.974378295 | Metabolism               |
| 0.279678707 | Metabolism               |
| 0.410432364 | Metabolism               |
| 0.010600585 | Metabolism               |
| 0.14469987  | Metabolism               |
| 1.20E-07    | Metabolism               |
| 0.605457992 | TME                      |
| 0.001389844 | Proliferation/Metastasis |
| 0.040423554 | Metabolism               |
| 0.015245604 | Proliferation/Metastasis |
| 0.72436395  | TME                      |
| 0.000375717 | Proliferation/Metastasis |

|             |                          |
|-------------|--------------------------|
| 1.82E-05    | Proliferation/Metastasis |
| 0.103707288 | TME                      |
| 0.319070531 | TME                      |
| 5.08E-08    | Metabolism               |
| 1.46E-13    | Metabolism               |
| 0.077961592 | Proliferation/Metastasis |
| 0.829962095 | Proliferation/Metastasis |
| 3.66E-06    | Proliferation/Metastasis |
| 0.002164569 | Metabolism               |
| 0.019551151 | Metabolism               |
| 0.411467471 | Metabolism               |
| 0.60624973  | Proliferation/Metastasis |
| 0.013479754 | TME                      |
| 0.129800161 | TME                      |
| 0.000107444 | Metabolism               |
| 1.76E-10    | Proliferation/Metastasis |
| 2.13E-11    | Metabolism               |
| 0.081801581 | TME                      |
| 0.865639438 | TME                      |
| 0.917422785 | TME                      |
| 0.034393728 | TME                      |
| 0.094866219 | Metabolism               |
| 0.000787582 | TME                      |
| 2.18E-07    | Proliferation/Metastasis |
| 0.010288955 | TME                      |
| 0.026747452 | Proliferation/Metastasis |
| 0.05841311  | Proliferation/Metastasis |
| 8.01E-08    | Metabolism               |
| 0.000503704 | Proliferation/Metastasis |
| 0.249076466 | TME                      |
| 0.860759955 | Metabolism               |
| 0.174411233 | TME                      |
| 0.008815275 | TME                      |
| 0.461988705 | TME                      |
| 0.6795868   | TME                      |
| 0.157206157 | TME                      |
| 0.028599469 | TME                      |
| 0.000636216 | Metabolism               |
| 0.000371262 | TME                      |
| 0.431472608 | Metabolism               |
| 0.053417563 | Metabolism               |
| 9.59E-05    | Proliferation/Metastasis |
| 0.336185216 | Proliferation/Metastasis |

|             |                          |
|-------------|--------------------------|
| 0.108921557 | Metabolism               |
| 0.033779    | Metabolism               |
| 1.63E-12    | Metabolism               |
| 1.62E-08    | Metabolism               |
| 2.38E-05    | Proliferation/Metastasis |
| 1.49E-13    | Proliferation/Metastasis |
| 0.927141531 | Metabolism               |
| 0.806527831 | Metabolism               |
| 0.01029665  | Metabolism               |
| 0.422212103 | TME                      |
| 0.883391759 | Metabolism               |
| 0.003369443 | Metabolism               |
| 0.483349003 | Metabolism               |
| 0.001113821 | Metabolism               |
| 7.38E-07    | Proliferation/Metastasis |
| 0.51552731  | Metabolism               |
| 0.019621341 | Metabolism               |
| 0.551901136 | Metabolism               |
| 5.79E-07    | Metabolism               |
| 5.22E-08    | Metabolism               |
| 7.54E-06    | Metabolism               |
| 0.668262605 | Proliferation/Metastasis |
| 0.000637687 | Metabolism               |
| 0.016563236 | Metabolism               |
| 1.16E-20    | Proliferation/Metastasis |
| 0.175457531 | Metabolism               |
| 7.98E-05    | Metabolism               |
| 0.003721002 | Metabolism               |
| 0.020463206 | Metabolism               |
| 0.000616362 | Metabolism               |
| 0.001731802 | Metabolism               |
| 0.007931279 | Metabolism               |
| 8.55E-05    | Metabolism               |
| 0.496256436 | TME                      |
| 0.552271463 | TME                      |
| 0.063849701 | TME                      |
| 0.551087697 | TME                      |
| 0.77698599  | TME                      |
| 0.000165058 | Metabolism               |
| 0.181063264 | Metabolism               |
| 6.95E-05    | Proliferation/Metastasis |
| 2.06E-05    | Metabolism               |
| 3.18E-07    | Proliferation/Metastasis |

|             |                          |
|-------------|--------------------------|
| 0.010138343 | Metabolism               |
| 0.035902976 | TME                      |
| 0.855276599 | Metabolism               |
| 0.000205039 | Metabolism               |
| 0.006683897 | Metabolism               |
| 0.012471345 | Metabolism               |
| 0.833872511 | TME                      |
| 0.835234868 | TME                      |
| 0.008929113 | Proliferation/Metastasis |
| 8.13E-07    | Metabolism               |
| 0.002507196 | Proliferation/Metastasis |
| 0.180074221 | Proliferation/Metastasis |
| 0.079125697 | TME                      |
| 0.000293015 | TME                      |
| 0.00087991  | TME                      |
| 0.001577906 | TME                      |
| 0.330867078 | Metabolism               |
| 1.69E-07    | Proliferation/Metastasis |
| 0.089212009 | Metabolism               |
| 1.32E-09    | Metabolism               |
| 3.16E-07    | Proliferation/Metastasis |
| 3.02E-11    | Proliferation/Metastasis |
| 4.29E-08    | Metabolism               |
| 0.313945462 | Metabolism               |
| 0.067413894 | Metabolism               |
| 0.5550157   | Metabolism               |
| 0.002218902 | TME                      |
| 0.00050906  | TME                      |
| 0.696602097 | TME                      |
| 0.542852316 | TME                      |
| 1.74E-23    | TME                      |
| 0.281544612 | Metabolism               |
| 0.398395215 | Metabolism               |
| 0.001047102 | Metabolism               |
| 0.116325858 | Metabolism               |
| 0.74224187  | Metabolism               |
| 1.34E-05    | TME                      |
| 1.55E-09    | TME                      |
| 1.68E-06    | TME                      |
| 0.002050871 | TME                      |
| 0.000268767 | TME                      |
| 0.00385074  | TME                      |
| 0.001572814 | TME                      |

|             |                          |
|-------------|--------------------------|
| 2.15E-05    | TME                      |
| 0.011035974 | TME                      |
| 0.931929202 | Proliferation/Metastasis |
| 0.051459049 | Proliferation/Metastasis |
| 0.741273773 | Metabolism               |
| 0.849967974 | Metabolism               |
| 0.008796    | TME                      |
| 0.675530149 | Metabolism               |
| 0.113550582 | Metabolism               |
| 6.03E-11    | TME                      |
| 0.020336461 | Proliferation/Metastasis |
| 0.575707464 | Proliferation/Metastasis |
| 0.012435742 | TME                      |
| 0.80628516  | Metabolism               |
| 4.20E-10    | Metabolism               |
| 0.034158347 | Proliferation/Metastasis |
| 3.76E-05    | Proliferation/Metastasis |
| 0.122446235 | TME                      |
| 3.24E-11    | TME                      |
| 0.007851607 | TME                      |
| 0.003793463 | TME                      |
| 0.405171858 | Proliferation/Metastasis |
| 0.117206389 | TME                      |
| 6.16E-07    | TME                      |
| 0.056139666 | Metabolism               |
| 4.87E-07    | TME                      |
| 9.58E-06    | TME                      |
| 0.000583775 | TME                      |
| 0.244913208 | TME                      |
| 0.009780919 | Metabolism               |
| 9.31E-05    | Metabolism               |
| 0.117369208 | Metabolism               |
| 0.000198429 | TME                      |
| 4.22E-05    | Metabolism               |
| 0.000182531 | TME                      |
| 0.233234286 | TME                      |
| 1.31E-07    | TME                      |
| 0.006472685 | TME                      |
| 0.095052302 | TME                      |
| 1.53E-11    | Metabolism               |
| 0.034974322 | Proliferation/Metastasis |
| 4.47E-21    | Metabolism               |
| 0.067312878 | Proliferation/Metastasis |

|             |                          |
|-------------|--------------------------|
| 0.225972506 | Metabolism               |
| 0.945272058 | Metabolism               |
| 0.040433164 | Metabolism               |
| 0.019414771 | Metabolism               |
| 1.43E-06    | Metabolism               |
| 2.84E-09    | Metabolism               |
| 0.234980913 | Metabolism               |
| 0.34703319  | Metabolism               |
| 0.583703395 | Metabolism               |
| 0.385553475 | Metabolism               |
| 0.025297499 | Metabolism               |
| 0.619518786 | Metabolism               |
| 0.030915658 | Metabolism               |
| 0.014352647 | Metabolism               |
| 0.000718419 | TME                      |
| 0.440962811 | Proliferation/Metastasis |
| 0.65476277  | Metabolism               |
| 4.56E-24    | Proliferation/Metastasis |
| 0.000320825 | TME                      |
| 3.03E-22    | Proliferation/Metastasis |
| 1.33E-15    | Proliferation/Metastasis |
| 9.27E-09    | TME                      |
| 1.54E-15    | TME                      |
| 0.048023194 | Metabolism               |
| 0.008839446 | Metabolism               |
| 0.619187585 | Proliferation/Metastasis |
| 0.000524176 | Proliferation/Metastasis |
| 3.88E-12    | Proliferation/Metastasis |
| 0.622998173 | Metabolism               |
| 0.017500629 | Metabolism               |
| 3.96E-11    | Metabolism               |
| 0.000129114 | Proliferation/Metastasis |
| 5.71E-11    | TME                      |
| 6.99E-16    | TME                      |
| 0.045173034 | Metabolism               |
| 1.30E-10    | Proliferation/Metastasis |
| 0.040677061 | Metabolism               |
| 0.186366622 | TME                      |
| 0.001541819 | TME                      |
| 1.05E-05    | TME                      |
| 0.000901169 | TME                      |
| 0.407677826 | Metabolism               |
| 1.81E-08    | TME                      |



|             |                          |
|-------------|--------------------------|
| 0.10874642  | Proliferation/Metastasis |
| 3.57E-17    | TME                      |
| 0.401407585 | Proliferation/Metastasis |
| 4.38E-12    | Proliferation/Metastasis |
| 0.132891579 | Metabolism               |
| 3.18E-06    | Proliferation/Metastasis |
| 1.04E-05    | TME                      |
| 0.000146934 | Metabolism               |
| 0.003801499 | TME                      |
| 0.196924949 | TME                      |
| 0.504578959 | TME                      |
| 2.42E-05    | TME                      |
| 0.023692585 | TME                      |
| 7.18E-05    | TME                      |
| 1.49E-14    | Metabolism               |
| 3.70E-22    | TME                      |
| 0.945486286 | Metabolism               |
| 0.708426989 | Metabolism               |
| 1.11E-18    | Proliferation/Metastasis |
| 0.010784899 | Proliferation/Metastasis |
| 0.00712419  | Metabolism               |
| 0.026261142 | Metabolism               |
| 0.000441573 | Metabolism               |
| 0.000649664 | Metabolism               |
| 1.00E-28    | Proliferation/Metastasis |
| 0.000357106 | Proliferation/Metastasis |
| 0.259941595 | Metabolism               |
| 0.582528971 | Metabolism               |
| 4.39E-09    | Metabolism               |
| 0.00431766  | TME                      |
| 1.88E-08    | Metabolism               |
| 0.01424367  | Metabolism               |
| 0.283618679 | Metabolism               |
| 0.368479745 | Metabolism               |
| 1.24E-12    | Proliferation/Metastasis |
| 0.004191636 | Metabolism               |
| 0.270632531 | Metabolism               |
| 1.05E-06    | Metabolism               |
| 0.160978146 | Metabolism               |
| 0.000130629 | Metabolism               |
| 0.203944934 | Metabolism               |
| 0.241199989 | Proliferation/Metastasis |
| 0.011409675 | Metabolism               |

|             |                          |
|-------------|--------------------------|
| 0.497657885 | Metabolism               |
| 0.055275055 | Proliferation/Metastasis |
| 3.06E-16    | Metabolism               |
| 0.236111617 | Metabolism               |
| 0.079041564 | Metabolism               |
| 4.70E-06    | Metabolism               |
| 5.40E-05    | Metabolism               |
| 8.65E-06    | Metabolism               |
| 0.086750681 | Metabolism               |
| 0.736737225 | Metabolism               |
| 0.001951368 | TME                      |
| 3.19E-09    | TME                      |
| 1.93E-14    | TME                      |
| 8.70E-07    | TME                      |
| 0.00010379  | TME                      |
| 3.96E-06    | Metabolism               |
| 0.245919313 | Metabolism               |
| 0.665217968 | Proliferation/Metastasis |
| 0.368334452 | Metabolism               |
| 5.51E-26    | Proliferation/Metastasis |
| 0.473445001 | Metabolism               |
| 8.90E-12    | TME                      |
| 0.01050178  | Metabolism               |
| 0.209174246 | Metabolism               |
| 5.30E-07    | Metabolism               |
| 5.14E-06    | Metabolism               |
| 0.011058139 | TME                      |
| 0.414941019 | TME                      |
| 2.70E-09    | Proliferation/Metastasis |
| 0.499092573 | Metabolism               |
| 0.005343171 | Proliferation/Metastasis |
| 0.551519761 | Proliferation/Metastasis |
| 0.966815269 | TME                      |
| 0.093752662 | TME                      |
| 0.066095328 | TME                      |
| 0.170344583 | TME                      |
| 0.525465025 | Metabolism               |
| 0.000127518 | Proliferation/Metastasis |
| 0.871292518 | Metabolism               |
| 0.060988695 | Metabolism               |
| 0.610804944 | Proliferation/Metastasis |
| 0.09180755  | Proliferation/Metastasis |
| 0.636790976 | Metabolism               |

|             |                          |
|-------------|--------------------------|
| 0.550080941 | Metabolism               |
| 0.150253432 | Metabolism               |
| 0.970090514 | Metabolism               |
| 0.159594173 | TME                      |
| 0.456178201 | TME                      |
| 0.098739316 | TME                      |
| 0.282959672 | TME                      |
| 2.83E-07    | TME                      |
| 0.372747926 | Metabolism               |
| 0.765850606 | Metabolism               |
| 0.385500261 | Metabolism               |
| 0.217525912 | Metabolism               |
| 0.508283706 | Metabolism               |
| 0.216451897 | TME                      |
| 2.06E-07    | TME                      |
| 0.371599631 | TME                      |
| 0.050094371 | TME                      |
| 0.031905282 | TME                      |
| 0.120492107 | TME                      |
| 0.091633757 | TME                      |
| 0.068230011 | TME                      |
| 0.187647549 | TME                      |
| 0.000159748 | Proliferation/Metastasis |
| 0.003438169 | Proliferation/Metastasis |
| 0.061099264 | Metabolism               |
| 0.553869948 | Metabolism               |
| 0.495068379 | TME                      |
| 0.793772838 | Metabolism               |
| 0.094698094 | Metabolism               |
| 0.041830449 | TME                      |
| 0.017117807 | Proliferation/Metastasis |
| 0.036235069 | Proliferation/Metastasis |
| 0.558094099 | TME                      |
| 0.26769849  | Metabolism               |
| 0.101309668 | Metabolism               |
| 0.009632369 | Proliferation/Metastasis |
| 0.404052352 | Proliferation/Metastasis |
| 0.068932959 | TME                      |
| 0.026689477 | TME                      |
| 0.059385573 | TME                      |
| 0.137838874 | TME                      |
| 0.000165984 | Proliferation/Metastasis |
| 0.404227709 | TME                      |

|             |                          |
|-------------|--------------------------|
| 0.120083435 | TME                      |
| 0.682873686 | Metabolism               |
| 0.174759013 | TME                      |
| 0.181936363 | TME                      |
| 0.083686582 | TME                      |
| 0.557081897 | TME                      |
| 0.416635995 | Metabolism               |
| 0.053609162 | Metabolism               |
| 0.081658205 | Metabolism               |
| 0.692472945 | TME                      |
| 0.296646623 | Metabolism               |
| 0.068988316 | TME                      |
| 0.339340432 | TME                      |
| 0.007219897 | TME                      |
| 0.141313816 | TME                      |
| 0.015510744 | TME                      |
| 0.006149322 | Metabolism               |
| 0.000167798 | Proliferation/Metastasis |
| 0.002739904 | Metabolism               |
| 0.318567097 | Proliferation/Metastasis |
| 0.23474088  | Metabolism               |
| 0.008840531 | Metabolism               |
| 0.86438359  | Metabolism               |
| 0.151849501 | Metabolism               |
| 0.00130584  | Metabolism               |
| 0.577612043 | Metabolism               |
| 0.777574179 | Metabolism               |
| 0.242219428 | Metabolism               |
| 0.363687539 | Metabolism               |
| 0.004518744 | Metabolism               |
| 0.412504009 | Metabolism               |
| 0.841344898 | Metabolism               |
| 0.233978361 | Metabolism               |
| 0.94579487  | Metabolism               |
| 0.331145711 | TME                      |
| 0.485430742 | Proliferation/Metastasis |
| 0.96727731  | Metabolism               |
| 5.39E-06    | Proliferation/Metastasis |
| 0.075145289 | TME                      |
| 0.002178057 | Proliferation/Metastasis |
| 3.99E-05    | Proliferation/Metastasis |
| 0.164473255 | TME                      |
| 0.003808041 | TME                      |

|             |                          |
|-------------|--------------------------|
| 0.394602209 | Metabolism               |
| 0.002497607 | Metabolism               |
| 0.34176282  | Proliferation/Metastasis |
| 9.83E-10    | Proliferation/Metastasis |
| 0.190942877 | Proliferation/Metastasis |
| 0.177018251 | Metabolism               |
| 0.076373419 | Metabolism               |
| 0.618118922 | Metabolism               |
| 0.95432032  | Proliferation/Metastasis |
| 0.005633341 | TME                      |
| 0.007651394 | TME                      |
| 0.752520291 | Metabolism               |
| 0.00072215  | Proliferation/Metastasis |
| 0.000776967 | Metabolism               |
| 0.126711626 | TME                      |
| 0.170355337 | TME                      |
| 0.623427887 | TME                      |
| 0.680344042 | TME                      |
| 0.224322088 | Metabolism               |
| 0.000256055 | TME                      |
| 0.001735556 | Proliferation/Metastasis |
| 0.018720061 | TME                      |
| 0.008215569 | Proliferation/Metastasis |
| 7.89E-08    | Proliferation/Metastasis |
| 0.478463274 | Metabolism               |
| 1.51E-05    | Proliferation/Metastasis |
| 0.114440852 | TME                      |
| 0.709220256 | Metabolism               |
| 0.953916914 | TME                      |
| 0.771159349 | TME                      |
| 0.887117965 | TME                      |
| 0.064509456 | TME                      |
| 0.038147429 | TME                      |
| 0.02461926  | TME                      |
| 0.005930324 | Metabolism               |
| 0.000320727 | TME                      |
| 0.525235306 | Metabolism               |
| 0.806050077 | Metabolism               |
| 1.69E-07    | Proliferation/Metastasis |
| 0.149016307 | Proliferation/Metastasis |
| 0.148500435 | Metabolism               |
| 0.009847051 | Metabolism               |
| 0.004931466 | Metabolism               |

|             |                          |
|-------------|--------------------------|
| 0.981104353 | Metabolism               |
| 1.44E-07    | Proliferation/Metastasis |
| 0.003568725 | Proliferation/Metastasis |
| 0.412552254 | Metabolism               |
| 0.977367643 | Metabolism               |
| 0.001695894 | Metabolism               |
| 0.633806386 | TME                      |
| 0.044086644 | Metabolism               |
| 0.178588608 | Metabolism               |
| 0.322872109 | Metabolism               |
| 0.777862994 | Metabolism               |
| 1.66E-08    | Proliferation/Metastasis |
| 0.23655001  | Metabolism               |
| 0.004579299 | Metabolism               |
| 0.810748355 | Metabolism               |
| 0.067270956 | Metabolism               |
| 0.000433876 | Metabolism               |
| 0.471826185 | Metabolism               |
| 0.386745117 | Proliferation/Metastasis |
| 0.99987539  | Metabolism               |
| 0.056753088 | Metabolism               |
| 0.042538613 | Proliferation/Metastasis |
| 0.000109461 | Metabolism               |
| 0.042160475 | Metabolism               |
| 0.181119131 | Metabolism               |
| 0.259472459 | Metabolism               |
| 0.019906243 | Metabolism               |
| 0.207822614 | Metabolism               |
| 0.027257269 | Metabolism               |
| 0.880348831 | Metabolism               |
| 0.559112924 | TME                      |
| 0.029606741 | TME                      |
| 0.000154797 | TME                      |
| 0.057298559 | TME                      |
| 0.055215136 | TME                      |
| 2.49E-07    | Metabolism               |
| 0.013152773 | Metabolism               |
| 0.036097736 | Proliferation/Metastasis |
| 0.000790024 | Metabolism               |
| 2.17E-06    | Proliferation/Metastasis |
| 0.162116026 | Metabolism               |
| 0.000216831 | TME                      |
| 0.757349584 | Metabolism               |

|             |                          |
|-------------|--------------------------|
| 0.301138772 | Metabolism               |
| 0.462445197 | Metabolism               |
| 0.560079584 | Metabolism               |
| 0.783600805 | TME                      |
| 0.528372656 | TME                      |
| 2.46E-05    | Proliferation/Metastasis |
| 0.375584529 | Metabolism               |
| 0.660865145 | Proliferation/Metastasis |
| 0.031198363 | Proliferation/Metastasis |
| 0.007239972 | TME                      |
| 0.906984118 | TME                      |
| 0.306137579 | TME                      |
| 0.316800662 | TME                      |
| 0.434198117 | Metabolism               |
| 0.41853774  | Proliferation/Metastasis |
| 0.009542061 | Metabolism               |
| 0.527905185 | Metabolism               |
| 0.472031352 | Proliferation/Metastasis |
| 0.609094155 | Proliferation/Metastasis |
| 0.001798618 | Metabolism               |
| 0.18187921  | Metabolism               |
| 0.045495695 | Metabolism               |
| 0.45194318  | Metabolism               |
| 0.420514946 | TME                      |
| 0.29056779  | TME                      |
| 0.750741399 | TME                      |
| 0.674847765 | TME                      |
| 0.090852887 | TME                      |
| 0.196062348 | Metabolism               |
| 0.63135694  | Metabolism               |
| 0.27895089  | Metabolism               |
| 0.03338344  | Metabolism               |
| 0.965260252 | Metabolism               |
| 0.003134739 | TME                      |
| 0.442647556 | TME                      |
| 0.259715387 | TME                      |
| 0.695861382 | TME                      |
| 0.359362924 | TME                      |
| 0.142550135 | TME                      |
| 0.14911326  | TME                      |
| 0.141014184 | TME                      |
| 0.53843219  | TME                      |
| 0.852951157 | Proliferation/Metastasis |

|             |                          |
|-------------|--------------------------|
| 0.2522389   | Proliferation/Metastasis |
| 0.745604859 | Metabolism               |
| 0.416535327 | Metabolism               |
| 0.033063459 | TME                      |
| 0.110761934 | Metabolism               |
| 0.527764405 | Metabolism               |
| 0.610884816 | TME                      |
| 0.749632157 | Proliferation/Metastasis |
| 0.711338023 | Proliferation/Metastasis |
| 0.535499297 | TME                      |
| 0.064907757 | Metabolism               |
| 0.095764351 | Metabolism               |
| 0.896756535 | Proliferation/Metastasis |
| 0.719938385 | Proliferation/Metastasis |
| 0.628927451 | TME                      |
| 0.818683711 | TME                      |
| 0.254394842 | TME                      |
| 0.386270358 | TME                      |
| 0.906577996 | Proliferation/Metastasis |
| 0.016978247 | TME                      |
| 0.426747742 | TME                      |
| 0.083420281 | Metabolism               |
| 0.456838673 | TME                      |
| 0.66111427  | TME                      |
| 0.502909409 | TME                      |
| 0.285238203 | TME                      |
| 0.122801512 | Metabolism               |
| 0.183418527 | Metabolism               |
| 0.282099121 | Metabolism               |
| 0.071973772 | TME                      |
| 0.365766161 | Metabolism               |
| 0.881582902 | TME                      |
| 0.703337453 | TME                      |
| 0.260039397 | TME                      |
| 0.032142229 | TME                      |
| 0.655244273 | TME                      |
| 0.718821077 | Metabolism               |
| 0.92255666  | Proliferation/Metastasis |
| 0.559395583 | Metabolism               |
| 0.13096557  | Proliferation/Metastasis |
| 0.246587416 | Metabolism               |
| 0.055262414 | Metabolism               |
| 0.002612979 | Metabolism               |



|             |                          |
|-------------|--------------------------|
| 0.375805463 | Metabolism               |
| 0.417631312 | Metabolism               |
| 0.818916475 | Metabolism               |
| 0.152276771 | Metabolism               |
| 0.003717134 | Metabolism               |
| 0.747411391 | Metabolism               |
| 0.115838586 | Metabolism               |
| 0.006802777 | Metabolism               |
| 0.004005903 | Metabolism               |
| 0.906269076 | Metabolism               |
| 0.883030269 | Metabolism               |
| 0.633907215 | TME                      |
| 0.331534765 | Proliferation/Metastasis |
| 0.912256683 | Metabolism               |
| 0.428425469 | Proliferation/Metastasis |
| 0.142376883 | TME                      |
| 0.073451123 | Proliferation/Metastasis |
| 0.414802263 | Proliferation/Metastasis |
| 0.998119325 | TME                      |
| 0.087502709 | TME                      |
| 0.282053654 | Metabolism               |
| 0.260195113 | Metabolism               |
| 0.766944639 | Proliferation/Metastasis |
| 0.015287314 | Proliferation/Metastasis |
| 0.12705215  | Proliferation/Metastasis |
| 0.099226987 | Metabolism               |
| 0.325801604 | Metabolism               |
| 0.891559715 | Metabolism               |
| 0.43550093  | Proliferation/Metastasis |
| 0.725485752 | TME                      |
| 0.099629631 | TME                      |
| 0.988279001 | Metabolism               |
| 0.300867874 | Proliferation/Metastasis |
| 0.881613481 | Metabolism               |
| 0.955428853 | TME                      |
| 0.504002154 | TME                      |
| 0.078161432 | TME                      |
| 0.055309276 | TME                      |
| 0.028540751 | Metabolism               |
| 0.602048721 | TME                      |
| 0.208125579 | Proliferation/Metastasis |
| 0.172624603 | TME                      |
| 0.741769014 | Proliferation/Metastasis |

|             |                          |
|-------------|--------------------------|
| 0.318611235 | Proliferation/Metastasis |
| 0.007857869 | Metabolism               |
| 0.884853198 | Proliferation/Metastasis |
| 0.269480464 | TME                      |
| 0.48569645  | Metabolism               |
| 0.3491249   | TME                      |
| 0.534478716 | TME                      |
| 0.772276319 | TME                      |
| 0.344444735 | TME                      |
| 0.938946379 | TME                      |
| 0.417611796 | TME                      |
| 0.171317552 | Metabolism               |
| 0.047704769 | TME                      |
| 0.003355107 | Metabolism               |
| 0.001416769 | Metabolism               |
| 0.56061774  | Proliferation/Metastasis |
| 0.475553365 | Proliferation/Metastasis |
| 0.351182883 | Metabolism               |
| 0.453382954 | Metabolism               |
| 0.481826145 | Metabolism               |
| 0.657801647 | Metabolism               |
| 0.093827804 | Proliferation/Metastasis |
| 0.693818697 | Proliferation/Metastasis |
| 0.01606763  | Metabolism               |
| 0.297231588 | Metabolism               |
| 0.15517041  | Metabolism               |
| 0.034935451 | TME                      |
| 0.643643175 | Metabolism               |
| 0.815771227 | Metabolism               |
| 0.17548074  | Metabolism               |
| 0.067981009 | Metabolism               |
| 0.164962252 | Proliferation/Metastasis |
| 0.529018627 | Metabolism               |
| 0.130125238 | Metabolism               |
| 0.333269197 | Metabolism               |
| 0.647088662 | Metabolism               |
| 0.923178948 | Metabolism               |
| 0.37441386  | Metabolism               |
| 0.86478935  | Proliferation/Metastasis |
| 0.021682414 | Metabolism               |
| 0.988908786 | Metabolism               |
| 0.263432783 | Proliferation/Metastasis |
| 0.250516034 | Metabolism               |

|             |                          |
|-------------|--------------------------|
| 0.756486764 | Metabolism               |
| 0.500298782 | Metabolism               |
| 0.087541004 | Metabolism               |
| 0.682509543 | Metabolism               |
| 0.389823276 | Metabolism               |
| 0.1195333   | Metabolism               |
| 0.000153988 | Metabolism               |
| 0.20968892  | TME                      |
| 0.180645219 | TME                      |
| 0.320440427 | TME                      |
| 0.257616821 | TME                      |
| 0.149646086 | TME                      |
| 0.415017613 | Metabolism               |
| 0.8660579   | Metabolism               |
| 0.913597832 | Proliferation/Metastasis |
| 0.011073298 | Metabolism               |
| 0.700317166 | Proliferation/Metastasis |
| 0.539174657 | Metabolism               |
| 0.772931522 | TME                      |
| 0.061053195 | Metabolism               |
| 0.14914278  | Metabolism               |
| 0.905755877 | Metabolism               |
| 0.212956962 | Metabolism               |
| 0.191967903 | TME                      |
| 0.54293082  | TME                      |
| 0.001062721 | Proliferation/Metastasis |
| 0.123268225 | Metabolism               |
| 0.282808687 | Proliferation/Metastasis |
| 0.288137055 | Proliferation/Metastasis |
| 0.140869758 | TME                      |
| 0.280477316 | TME                      |
| 0.524077305 | TME                      |
| 0.476855779 | TME                      |
| 0.535850576 | Metabolism               |
| 0.003225812 | Proliferation/Metastasis |
| 0.220809148 | Metabolism               |
| 0.760175884 | Metabolism               |
| 0.119207055 | Proliferation/Metastasis |
| 0.045360555 | Proliferation/Metastasis |
| 0.756759924 | Metabolism               |
| 0.501857158 | Metabolism               |
| 0.380588268 | Metabolism               |
| 0.220524866 | Metabolism               |

|             |                          |
|-------------|--------------------------|
| 0.802664826 | TME                      |
| 0.487393234 | TME                      |
| 0.502440181 | TME                      |
| 0.32465807  | TME                      |
| 0.007302072 | TME                      |
| 0.717000317 | Metabolism               |
| 0.234657336 | Metabolism               |
| 0.975509766 | Metabolism               |
| 0.07072975  | Metabolism               |
| 0.490364056 | Metabolism               |
| 0.044972464 | TME                      |
| 0.173497314 | TME                      |
| 0.647371656 | TME                      |
| 0.88610488  | TME                      |
| 0.323526167 | TME                      |
| 0.514757422 | TME                      |
| 0.504606613 | TME                      |
| 0.193148149 | TME                      |
| 0.444733438 | TME                      |
| 0.763681075 | Proliferation/Metastasis |
| 0.30798938  | Proliferation/Metastasis |
| 0.011548461 | Metabolism               |
| 0.823177589 | Metabolism               |
| 0.103895168 | TME                      |
| 0.941653532 | Metabolism               |
| 0.382654977 | Metabolism               |
| 0.739260589 | TME                      |
| 9.76E-05    | Proliferation/Metastasis |
| 0.009634613 | Proliferation/Metastasis |
| 0.567351521 | TME                      |
| 0.15583456  | Metabolism               |
| 0.715179852 | Metabolism               |
| 0.460697816 | Proliferation/Metastasis |
| 0.005588296 | Proliferation/Metastasis |
| 0.826468165 | TME                      |
| 0.80983952  | TME                      |
| 0.976255295 | TME                      |
| 0.76103301  | TME                      |
| 0.57425167  | Proliferation/Metastasis |
| 0.104947644 | TME                      |
| 0.767351253 | TME                      |
| 0.158266517 | Metabolism               |
| 0.97271574  | TME                      |

|             |                          |
|-------------|--------------------------|
| 0.722731553 | TME                      |
| 0.255522013 | TME                      |
| 0.113711406 | TME                      |
| 0.03447752  | Metabolism               |
| 0.484402636 | Metabolism               |
| 0.086720498 | Metabolism               |
| 0.117438694 | TME                      |
| 0.288065248 | Metabolism               |
| 0.853192463 | TME                      |
| 0.813183792 | TME                      |
| 0.697649991 | TME                      |
| 0.528593932 | TME                      |
| 0.140675213 | TME                      |
| 0.897546563 | Metabolism               |
| 0.786889112 | Proliferation/Metastasis |
| 0.044897685 | Metabolism               |
| 0.881853734 | Proliferation/Metastasis |
| 0.820878493 | Metabolism               |
| 0.608451045 | Metabolism               |
| 0.4379189   | Metabolism               |
| 0.236703495 | Metabolism               |
| 0.17756623  | Metabolism               |
| 0.712323029 | Metabolism               |
| 0.56416645  | Metabolism               |
| 0.97107511  | Metabolism               |
| 0.508606199 | Metabolism               |
| 0.083659995 | Metabolism               |
| 0.967602063 | Metabolism               |
| 0.133500396 | Metabolism               |
| 0.203752453 | Metabolism               |
| 0.0574761   | Metabolism               |
| 0.956814134 | TME                      |
| 0.025055535 | Proliferation/Metastasis |
| 0.285504928 | Metabolism               |
| 0.52654047  | Proliferation/Metastasis |
| 0.550583945 | TME                      |
| 0.931478791 | Proliferation/Metastasis |
| 0.457647966 | Proliferation/Metastasis |
| 0.243566525 | TME                      |
| 0.758978253 | TME                      |
| 0.119050105 | Metabolism               |
| 0.021656272 | Metabolism               |
| 0.919115098 | Proliferation/Metastasis |

|             |                          |
|-------------|--------------------------|
| 0.216347719 | Proliferation/Metastasis |
| 0.09049545  | Proliferation/Metastasis |
| 0.032495646 | Metabolism               |
| 0.293029005 | Metabolism               |
| 0.522443553 | Metabolism               |
| 0.43327556  | Proliferation/Metastasis |
| 0.993384526 | TME                      |
| 0.646610469 | TME                      |
| 0.240928256 | Metabolism               |
| 0.045201853 | Proliferation/Metastasis |
| 0.07464789  | Metabolism               |
| 0.894073181 | TME                      |
| 0.626435822 | TME                      |
| 0.337707658 | TME                      |
| 0.124872161 | TME                      |
| 0.47495892  | Metabolism               |
| 0.107201677 | TME                      |
| 0.006539078 | Proliferation/Metastasis |
| 0.909315627 | TME                      |
| 0.109109943 | Proliferation/Metastasis |
| 0.255812557 | Proliferation/Metastasis |
| 0.1924849   | Metabolism               |
| 0.002788119 | Proliferation/Metastasis |
| 0.758783233 | TME                      |
| 0.15046193  | Metabolism               |
| 0.546013036 | TME                      |
| 0.944022517 | TME                      |
| 0.804427715 | TME                      |
| 0.359890996 | TME                      |
| 0.068965916 | TME                      |
| 0.749343072 | TME                      |
| 0.475601349 | Metabolism               |
| 0.321157034 | TME                      |
| 0.13234786  | Metabolism               |
| 0.410458804 | Metabolism               |
| 0.356742314 | Proliferation/Metastasis |
| 0.005400259 | Proliferation/Metastasis |
| 0.935336276 | Metabolism               |
| 0.19561874  | Metabolism               |
| 0.098105305 | Metabolism               |
| 2.70E-05    | Metabolism               |
| 0.506813841 | Proliferation/Metastasis |
| 0.345473702 | Proliferation/Metastasis |

|             |                          |
|-------------|--------------------------|
| 0.118290031 | Metabolism               |
| 0.173940777 | Metabolism               |
| 0.03166618  | Metabolism               |
| 0.16658165  | TME                      |
| 0.965602678 | Metabolism               |
| 0.256510484 | Metabolism               |
| 0.576301492 | Metabolism               |
| 0.724925434 | Metabolism               |
| 0.005338865 | Proliferation/Metastasis |
| 0.271264641 | Metabolism               |
| 0.995018695 | Metabolism               |
| 0.075062881 | Metabolism               |
| 0.287639773 | Metabolism               |
| 0.027345769 | Metabolism               |
| 0.111855821 | Metabolism               |
| 0.001686717 | Proliferation/Metastasis |
| 0.376068799 | Metabolism               |
| 0.31205956  | Metabolism               |
| 0.012934799 | Proliferation/Metastasis |
| 0.927768744 | Metabolism               |
| 0.012915713 | Metabolism               |
| 0.293671623 | Metabolism               |
| 0.147306292 | Metabolism               |
| 0.728023184 | Metabolism               |
| 0.133342294 | Metabolism               |
| 0.361736041 | Metabolism               |
| 0.302387524 | Metabolism               |
| 0.511778285 | TME                      |
| 0.15798305  | TME                      |
| 0.875233818 | TME                      |
| 0.511275054 | TME                      |
| 0.289170872 | TME                      |
| 0.096467144 | Metabolism               |
| 0.283582532 | Metabolism               |
| 0.002384011 | Proliferation/Metastasis |
| 0.049431705 | Metabolism               |
| 0.06210305  | Proliferation/Metastasis |
| 0.290991654 | Metabolism               |
| 0.444248736 | TME                      |
| 0.717000184 | Metabolism               |
| 0.070666363 | Metabolism               |
| 0.758492597 | Metabolism               |
| 0.089735755 | Metabolism               |

|             |                          |
|-------------|--------------------------|
| 0.312012862 | TME                      |
| 0.075347993 | TME                      |
| 0.159136876 | Proliferation/Metastasis |
| 0.199328142 | Metabolism               |
| 0.992574487 | Proliferation/Metastasis |
| 0.135941377 | Proliferation/Metastasis |
| 0.163222609 | TME                      |
| 0.193409112 | TME                      |
| 0.093109852 | TME                      |
| 0.239081532 | TME                      |
| 0.867287749 | Metabolism               |
| 0.720992881 | Proliferation/Metastasis |
| 0.339216993 | Metabolism               |
| 0.509788581 | Metabolism               |
| 0.505724049 | Proliferation/Metastasis |
| 0.346644568 | Proliferation/Metastasis |
| 0.529778596 | Metabolism               |
| 0.523121664 | Metabolism               |
| 0.346605935 | Metabolism               |
| 0.524686281 | Metabolism               |
| 0.31624882  | TME                      |
| 0.51296205  | TME                      |
| 0.119395872 | TME                      |
| 0.278454691 | TME                      |
| 0.244995351 | TME                      |
| 0.895226111 | Metabolism               |
| 0.354927078 | Metabolism               |
| 0.036118919 | Metabolism               |
| 0.100578047 | Metabolism               |
| 0.615799645 | Metabolism               |
| 0.750597724 | TME                      |
| 0.102376277 | TME                      |
| 0.49408068  | TME                      |
| 0.276165398 | TME                      |
| 0.289463855 | TME                      |
| 0.233445564 | TME                      |
| 0.252820635 | TME                      |
| 0.132007444 | TME                      |
| 0.51864525  | TME                      |
| 0.136249484 | Proliferation/Metastasis |
| 0.225235472 | Proliferation/Metastasis |
| 0.740554893 | Metabolism               |
| 0.74326071  | Metabolism               |



|             |                          |
|-------------|--------------------------|
| 0.112077614 | TME                      |
| 0.968291302 | Metabolism               |
| 0.742069032 | Metabolism               |
| 0.120725785 | TME                      |
| 0.422945592 | Proliferation/Metastasis |
| 0.935609824 | Proliferation/Metastasis |
| 0.203639353 | TME                      |
| 0.92732516  | Metabolism               |
| 0.556422615 | Metabolism               |
| 0.265312913 | Proliferation/Metastasis |
| 0.484422122 | Proliferation/Metastasis |
| 0.27876269  | TME                      |
| 0.827740607 | TME                      |
| 0.385253338 | TME                      |
| 0.501962941 | TME                      |
| 0.022238136 | Proliferation/Metastasis |
| 0.496424481 | TME                      |
| 0.398704741 | TME                      |
| 0.351306935 | Metabolism               |
| 0.093223602 | TME                      |
| 0.409052339 | TME                      |
| 0.179629966 | TME                      |
| 0.025288759 | TME                      |
| 0.980515023 | Metabolism               |
| 0.750440641 | Metabolism               |
| 0.556991643 | Metabolism               |
| 0.528792366 | TME                      |
| 0.596071455 | Metabolism               |
| 0.142148029 | TME                      |
| 0.119981647 | TME                      |
| 0.072693087 | TME                      |
| 0.931020179 | TME                      |
| 0.049794864 | TME                      |
| 0.307326884 | Metabolism               |
| 0.112716754 | Proliferation/Metastasis |
| 0.581654318 | Metabolism               |
| 0.605524369 | Proliferation/Metastasis |
| 0.600371782 | Metabolism               |
| 0.966038146 | Metabolism               |
| 0.299824333 | Metabolism               |
| 0.815788066 | Metabolism               |
| 0.387381374 | Metabolism               |
| 0.904129597 | Metabolism               |

|             |                          |
|-------------|--------------------------|
| 0.877106642 | Metabolism               |
| 0.507684611 | Metabolism               |
| 0.642227718 | Metabolism               |
| 0.211628889 | Metabolism               |
| 0.79670676  | Metabolism               |
| 0.347166668 | Metabolism               |
| 0.186585501 | Metabolism               |
| 0.402332697 | Metabolism               |
| 0.773551381 | TME                      |
| 0.953514219 | Proliferation/Metastasis |
| 0.263439359 | Metabolism               |
| 0.606420925 | Proliferation/Metastasis |
| 0.234319764 | TME                      |
| 0.333917871 | Proliferation/Metastasis |
| 0.579594799 | Proliferation/Metastasis |
| 0.542885397 | TME                      |
| 0.218312392 | TME                      |
| 0.897858048 | Metabolism               |
| 0.785723085 | Metabolism               |
| 0.861769247 | Proliferation/Metastasis |
| 0.06568038  | Proliferation/Metastasis |
| 0.529518416 | Proliferation/Metastasis |
| 0.856351441 | Metabolism               |
| 0.712285075 | Metabolism               |
| 0.650787744 | Metabolism               |
| 0.88208685  | Proliferation/Metastasis |
| 0.825407726 | TME                      |
| 0.085836381 | TME                      |
| 0.172649959 | Metabolism               |
| 0.253813193 | Proliferation/Metastasis |
| 0.410158527 | Metabolism               |
| 0.362624089 | TME                      |
| 0.369936178 | TME                      |
| 0.934542312 | TME                      |
| 0.916683852 | TME                      |
| 0.929053163 | Metabolism               |
| 0.033966808 | TME                      |
| 0.140522132 | Proliferation/Metastasis |
| 0.311028594 | TME                      |
| 0.046123947 | Proliferation/Metastasis |
| 0.73975369  | Proliferation/Metastasis |
| 0.939102362 | Metabolism               |
| 0.06850133  | Proliferation/Metastasis |

|             |                          |
|-------------|--------------------------|
| 0.246089635 | TME                      |
| 0.717091696 | Metabolism               |
| 0.144396048 | TME                      |
| 0.354179418 | TME                      |
| 0.605797263 | TME                      |
| 0.140624263 | TME                      |
| 0.337658504 | TME                      |
| 0.280011395 | TME                      |
| 0.592265616 | Metabolism               |
| 0.506806171 | TME                      |
| 0.00493031  | Metabolism               |
| 0.978340233 | Metabolism               |
| 0.630288106 | Proliferation/Metastasis |
| 0.257943017 | Proliferation/Metastasis |
| 0.124377794 | Metabolism               |
| 0.665784124 | Metabolism               |
| 0.295692082 | Metabolism               |
| 0.405737034 | Metabolism               |
| 0.116623079 | Proliferation/Metastasis |
| 0.945519221 | Proliferation/Metastasis |
| 0.005849042 | Metabolism               |
| 0.665235611 | Metabolism               |
| 0.618465254 | Metabolism               |
| 0.674467938 | TME                      |
| 0.580838479 | Metabolism               |
| 0.867080382 | Metabolism               |
| 0.032712539 | Metabolism               |
| 0.129637252 | Metabolism               |
| 0.213270677 | Proliferation/Metastasis |
| 0.771936902 | Metabolism               |
| 0.200750633 | Metabolism               |
| 0.664564565 | Metabolism               |
| 0.008647021 | Metabolism               |
| 0.058671913 | Metabolism               |
| 0.701063591 | Metabolism               |
| 0.095053676 | Proliferation/Metastasis |
| 0.717461131 | Metabolism               |
| 0.885417987 | Metabolism               |
| 0.500357916 | Proliferation/Metastasis |
| 0.517841646 | Metabolism               |
| 0.154965362 | Metabolism               |
| 0.088792773 | Metabolism               |
| 0.117870667 | Metabolism               |

|             |                          |
|-------------|--------------------------|
| 0.238169841 | Metabolism               |
| 0.500713911 | Metabolism               |
| 0.81478511  | Metabolism               |
| 0.027708739 | Metabolism               |
| 0.06750034  | TME                      |
| 0.095851582 | TME                      |
| 0.161294265 | TME                      |
| 0.116393458 | TME                      |
| 0.167195689 | TME                      |
| 0.833910935 | Metabolism               |
| 0.681725819 | Metabolism               |
| 0.335109828 | Proliferation/Metastasis |
| 0.173274775 | Metabolism               |
| 0.989074634 | Proliferation/Metastasis |
| 0.638144991 | Metabolism               |
| 0.541050389 | TME                      |
| 0.654868351 | Metabolism               |
| 0.547336433 | Metabolism               |
| 0.649405167 | Metabolism               |
| 0.409554429 | Metabolism               |
| 0.272851355 | TME                      |
| 0.888909305 | TME                      |
| 0.033541236 | Proliferation/Metastasis |
| 0.839580348 | Metabolism               |
| 0.620125007 | Proliferation/Metastasis |
| 0.241810978 | Proliferation/Metastasis |
| 0.804304233 | TME                      |
| 0.390886856 | TME                      |
| 0.839890196 | TME                      |
| 0.953308258 | TME                      |
| 0.045894916 | Metabolism               |
| 0.542478729 | Proliferation/Metastasis |
| 0.259759071 | Metabolism               |
| 0.038809311 | Metabolism               |
| 0.954066684 | Proliferation/Metastasis |
| 0.942066245 | Proliferation/Metastasis |
| 0.605127899 | Metabolism               |
| 0.46865566  | Metabolism               |
| 0.071889417 | Metabolism               |
| 0.013323014 | Metabolism               |
| 0.59031227  | TME                      |
| 0.560072888 | TME                      |
| 0.820046742 | TME                      |

|             |                          |
|-------------|--------------------------|
| 0.409470737 | TME                      |
| 0.788304838 | TME                      |
| 0.014777599 | Metabolism               |
| 0.009576691 | Metabolism               |
| 0.983929402 | Metabolism               |
| 0.026346478 | Metabolism               |
| 0.01332068  | Metabolism               |
| 0.507494465 | TME                      |
| 0.452148355 | TME                      |
| 0.500930383 | TME                      |
| 0.758114886 | TME                      |
| 0.730183148 | TME                      |
| 0.743632149 | TME                      |
| 0.783102669 | TME                      |
| 0.880233706 | TME                      |
| 0.568757212 | TME                      |
| 0.471187832 | Proliferation/Metastasis |
| 0.2473637   | Proliferation/Metastasis |
| 0.196306727 | Metabolism               |
| 0.095405892 | Metabolism               |
| 0.874781424 | TME                      |
| 0.093431217 | Metabolism               |
| 0.028706035 | Metabolism               |
| 0.780458403 | TME                      |
| 0.028896899 | Proliferation/Metastasis |
| 0.733148788 | Proliferation/Metastasis |
| 0.486089327 | TME                      |
| 0.02302988  | Metabolism               |
| 0.12705678  | Metabolism               |
| 0.6133285   | Proliferation/Metastasis |
| 0.223887201 | Proliferation/Metastasis |
| 0.814813009 | TME                      |
| 0.486612006 | TME                      |
| 0.935801034 | TME                      |
| 0.97252868  | TME                      |
| 0.559351908 | Proliferation/Metastasis |
| 0.448913489 | TME                      |
| 0.794591204 | TME                      |
| 0.086048237 | Metabolism               |
| 0.282920577 | TME                      |
| 0.841691645 | TME                      |
| 0.866067588 | TME                      |
| 0.017411532 | TME                      |

|             |                          |
|-------------|--------------------------|
| 0.220517677 | Metabolism               |
| 0.116331026 | Metabolism               |
| 0.03642284  | Metabolism               |
| 0.458908183 | TME                      |
| 0.316253804 | Metabolism               |
| 0.944370675 | TME                      |
| 0.960356009 | TME                      |
| 0.765914118 | TME                      |
| 0.788843192 | TME                      |
| 0.392902643 | TME                      |
| 0.212425026 | Metabolism               |
| 0.742895544 | Proliferation/Metastasis |
| 0.38253301  | Metabolism               |
| 0.790113986 | Proliferation/Metastasis |
| 0.55542092  | Metabolism               |
| 0.456472033 | Metabolism               |
| 0.795597545 | Metabolism               |
| 0.059069208 | Metabolism               |
| 0.268123369 | Metabolism               |
| 0.908141894 | Metabolism               |
| 0.87626111  | Metabolism               |
| 0.27375559  | Metabolism               |
| 0.057483244 | Metabolism               |
| 0.319161808 | Metabolism               |
| 0.484936389 | Metabolism               |
| 0.43358401  | Metabolism               |
| 0.31364014  | Metabolism               |
| 0.404004096 | Metabolism               |
| 0.857492969 | TME                      |
| 0.142949541 | Proliferation/Metastasis |
| 0.236804411 | Metabolism               |
| 0.139353082 | Proliferation/Metastasis |
| 0.639567235 | TME                      |
| 0.747872145 | Proliferation/Metastasis |
| 0.494963738 | Proliferation/Metastasis |
| 0.894507106 | TME                      |
| 0.9429805   | TME                      |
| 0.489697274 | Metabolism               |
| 0.01742975  | Metabolism               |
| 0.152484377 | Proliferation/Metastasis |
| 0.656425314 | Proliferation/Metastasis |
| 0.227181763 | Proliferation/Metastasis |
| 0.057922487 | Metabolism               |

|             |                          |
|-------------|--------------------------|
| 0.74628443  | Metabolism               |
| 0.050286945 | Metabolism               |
| 0.18199819  | Proliferation/Metastasis |
| 0.859457899 | TME                      |
| 0.29526582  | TME                      |
| 0.095970983 | Metabolism               |
| 0.078430695 | Proliferation/Metastasis |
| 0.002405093 | Metabolism               |
| 0.415852581 | TME                      |
| 0.237921307 | TME                      |
| 0.709959998 | TME                      |
| 0.390980681 | TME                      |
| 0.018012865 | Metabolism               |
| 0.571779319 | TME                      |
| 0.264430083 | Proliferation/Metastasis |
| 0.767009666 | TME                      |
| 0.002896336 | Proliferation/Metastasis |
| 0.122843224 | Proliferation/Metastasis |
| 0.267717248 | Metabolism               |
| 0.119991787 | Proliferation/Metastasis |
| 0.727760842 | TME                      |
| 0.362248757 | Metabolism               |
| 0.534388797 | TME                      |
| 0.977090051 | TME                      |
| 0.445956467 | TME                      |
| 0.836120416 | TME                      |
| 0.264894411 | TME                      |
| 0.942601361 | TME                      |
| 0.336555052 | Metabolism               |
| 0.326811377 | TME                      |
| 0.003729457 | Metabolism               |
| 0.966004211 | Metabolism               |
| 0.724823909 | Proliferation/Metastasis |
| 0.88997283  | Proliferation/Metastasis |
| 0.503893494 | Metabolism               |
| 0.724757351 | Metabolism               |
| 0.060971445 | Metabolism               |
| 0.781231564 | Metabolism               |
| 0.282440128 | Proliferation/Metastasis |
| 0.129974509 | Proliferation/Metastasis |
| 0.008278964 | Metabolism               |
| 0.004053079 | Metabolism               |
| 0.335273516 | Metabolism               |

|             |                          |
|-------------|--------------------------|
| 0.756787559 | TME                      |
| 0.164153613 | Metabolism               |
| 0.313473242 | Metabolism               |
| 0.118832237 | Metabolism               |
| 0.009351017 | Metabolism               |
| 0.29810321  | Proliferation/Metastasis |
| 0.04637119  | Metabolism               |
| 0.005926634 | Metabolism               |
| 0.032273143 | Metabolism               |
| 0.296396165 | Metabolism               |
| 0.077816489 | Metabolism               |
| 0.175013688 | Metabolism               |
| 0.436129831 | Proliferation/Metastasis |
| 0.005987998 | Metabolism               |
| 0.198367402 | Metabolism               |
| 0.041431619 | Proliferation/Metastasis |
| 0.195564407 | Metabolism               |
| 0.90990387  | Metabolism               |
| 0.041254764 | Metabolism               |
| 0.000978297 | Metabolism               |
| 0.607544458 | Metabolism               |
| 0.005224901 | Metabolism               |
| 0.960007223 | Metabolism               |
| 0.011911026 | Metabolism               |
| 0.967609926 | TME                      |
| 0.580037237 | TME                      |
| 0.534273    | TME                      |
| 0.904940831 | TME                      |
| 0.894456984 | TME                      |
| 0.133983199 | Metabolism               |
| 0.1216977   | Metabolism               |
| 0.490357145 | Proliferation/Metastasis |
| 0.2857183   | Metabolism               |
| 0.655815082 | Proliferation/Metastasis |
| 0.079177412 | Metabolism               |
| 0.956330995 | TME                      |
| 0.060746608 | Metabolism               |
| 0.314393462 | Metabolism               |
| 0.068608615 | Metabolism               |
| 0.056299393 | Metabolism               |
| 0.193529831 | TME                      |
| 0.852846185 | TME                      |
| 0.61497343  | Proliferation/Metastasis |



|             |                          |
|-------------|--------------------------|
| 0.138141821 | Metabolism               |
| 0.057312977 | Proliferation/Metastasis |
| 0.077641662 | Proliferation/Metastasis |
| 0.61184017  | TME                      |
| 0.070846667 | TME                      |
| 0.066297656 | TME                      |
| 0.134392956 | TME                      |
| 0.678222367 | Metabolism               |
| 0.00038627  | Proliferation/Metastasis |
| 0.094247084 | Metabolism               |
| 0.011207704 | Metabolism               |
| 0.729945702 | Proliferation/Metastasis |
| 0.68263101  | Proliferation/Metastasis |
| 0.061692557 | Metabolism               |
| 0.604247929 | Metabolism               |
| 0.646560827 | Metabolism               |
| 0.395974931 | Metabolism               |
| 0.607011218 | TME                      |
| 0.028660331 | TME                      |
| 0.049552449 | TME                      |
| 0.176852187 | TME                      |
| 0.984954694 | TME                      |
| 0.975766679 | Metabolism               |
| 0.420308878 | Metabolism               |
| 0.222418823 | Metabolism               |
| 0.727371178 | Metabolism               |
| 0.267285755 | Metabolism               |
| 0.845001011 | TME                      |
| 0.868536575 | TME                      |
| 0.062714241 | TME                      |
| 0.237000741 | TME                      |
| 0.049049744 | TME                      |
| 0.269466863 | TME                      |
| 0.253987721 | TME                      |
| 0.317332266 | TME                      |
| 0.070341089 | TME                      |
| 0.914345717 | Proliferation/Metastasis |
| 0.081348179 | Proliferation/Metastasis |
| 0.07370328  | Metabolism               |
| 0.877524336 | Metabolism               |
| 0.756034652 | TME                      |
| 0.393093598 | Metabolism               |
| 0.202022055 | Metabolism               |

|             |                          |
|-------------|--------------------------|
| 0.022325774 | TME                      |
| 0.003905942 | Proliferation/Metastasis |
| 0.02300211  | Proliferation/Metastasis |
| 0.190761806 | TME                      |
| 0.592092732 | Metabolism               |
| 0.267917621 | Metabolism               |
| 0.53355753  | Proliferation/Metastasis |
| 0.625685934 | Proliferation/Metastasis |
| 0.18096328  | TME                      |
| 0.024986195 | TME                      |
| 0.171934004 | TME                      |
| 0.097838412 | TME                      |
| 0.708424722 | Proliferation/Metastasis |
| 0.610406947 | TME                      |
| 0.020370119 | TME                      |
| 0.267438495 | Metabolism               |
| 0.077739015 | TME                      |
| 0.098553409 | TME                      |
| 0.088662506 | TME                      |
| 0.117544464 | TME                      |
| 0.527360715 | Metabolism               |
| 0.401939239 | Metabolism               |
| 0.111648888 | Metabolism               |
| 0.56803011  | TME                      |
| 0.626528758 | Metabolism               |
| 0.093344896 | TME                      |
| 0.242753733 | TME                      |
| 0.344764918 | TME                      |
| 0.120647542 | TME                      |
| 0.071028046 | TME                      |
| 0.034290812 | Metabolism               |
| 0.702500443 | Proliferation/Metastasis |
| 0.003403245 | Metabolism               |
| 0.603803778 | Proliferation/Metastasis |
| 0.027263335 | Metabolism               |
| 0.662718128 | Metabolism               |
| 0.113983408 | Metabolism               |
| 0.613926045 | Metabolism               |
| 0.081368251 | Metabolism               |
| 0.013246951 | Metabolism               |
| 0.302812832 | Metabolism               |
| 0.408683591 | Metabolism               |
| 0.000982492 | Metabolism               |

|             |                          |
|-------------|--------------------------|
| 8.28E-06    | Metabolism               |
| 0.059913198 | Metabolism               |
| 0.883215381 | Metabolism               |
| 0.400519797 | Metabolism               |
| 0.862793804 | Metabolism               |
| 0.027256848 | TME                      |
| 0.337950877 | Proliferation/Metastasis |
| 0.10997503  | Metabolism               |
| 0.162311313 | Proliferation/Metastasis |
| 0.581410471 | TME                      |
| 0.07772136  | Proliferation/Metastasis |
| 0.279188041 | Proliferation/Metastasis |
| 0.144387023 | TME                      |
| 0.166839901 | TME                      |
| 0.005822538 | Metabolism               |
| 0.480380173 | Metabolism               |
| 0.049988795 | Proliferation/Metastasis |
| 0.95959821  | Proliferation/Metastasis |
| 0.60850903  | Proliferation/Metastasis |
| 0.016600186 | Metabolism               |
| 0.224899354 | Metabolism               |
| 0.067787891 | Metabolism               |
| 0.004518687 | Proliferation/Metastasis |
| 0.019451015 | TME                      |
| 0.014481328 | TME                      |
| 0.612151292 | Metabolism               |
| 0.964059694 | Proliferation/Metastasis |
| 0.965307721 | Metabolism               |
| 0.336880578 | TME                      |
| 0.235382838 | TME                      |
| 0.257215925 | TME                      |
| 0.552264214 | TME                      |
| 0.613526054 | Metabolism               |
| 0.302441113 | TME                      |
| 0.020365835 | Proliferation/Metastasis |
| 0.01585457  | TME                      |
| 0.640034109 | Proliferation/Metastasis |
| 0.009214203 | Proliferation/Metastasis |
| 0.40398552  | Metabolism               |
| 0.020222978 | Proliferation/Metastasis |
| 0.035398929 | TME                      |
| 0.787473656 | Metabolism               |
| 0.309940804 | TME                      |

|             |                          |
|-------------|--------------------------|
| 0.278244773 | TME                      |
| 0.409246537 | TME                      |
| 0.059854453 | TME                      |
| 0.011910304 | TME                      |
| 0.217186654 | TME                      |
| 0.51140417  | Metabolism               |
| 0.132276877 | TME                      |
| 0.208268544 | Metabolism               |
| 0.010631208 | Metabolism               |
| 0.113546937 | Proliferation/Metastasis |
| 0.036793515 | Proliferation/Metastasis |
| 0.484416838 | Metabolism               |
| 0.670802395 | Metabolism               |
| 0.675747792 | Metabolism               |
| 0.010166577 | Metabolism               |
| 0.004226663 | Proliferation/Metastasis |
| 0.830763196 | Proliferation/Metastasis |
| 0.245252212 | Metabolism               |
| 0.916187267 | Metabolism               |
| 0.000237107 | Metabolism               |
| 0.898465127 | TME                      |
| 0.445261868 | Metabolism               |
| 0.475360629 | Metabolism               |
| 0.184197144 | Metabolism               |
| 0.422160582 | Metabolism               |
| 0.006631784 | Proliferation/Metastasis |
| 0.319725431 | Metabolism               |
| 0.941218296 | Metabolism               |
| 0.711634053 | Metabolism               |
| 0.387220403 | Metabolism               |
| 0.130197897 | Metabolism               |
| 0.583779953 | Metabolism               |
| 0.173539344 | Proliferation/Metastasis |
| 0.493265319 | Metabolism               |
| 0.391800616 | Metabolism               |
| 0.2255266   | Proliferation/Metastasis |
| 0.160634641 | Metabolism               |
| 0.001572363 | Metabolism               |
| 0.781322423 | Metabolism               |
| 0.132189065 | Metabolism               |
| 0.641784657 | Metabolism               |
| 0.432368259 | Metabolism               |
| 0.106131666 | Metabolism               |

|             |                          |
|-------------|--------------------------|
| 0.843862134 | Metabolism               |
| 0.141129118 | TME                      |
| 0.104575337 | TME                      |
| 0.511745998 | TME                      |
| 0.132934262 | TME                      |
| 0.219912747 | TME                      |
| 0.229982669 | Metabolism               |
| 0.636251788 | Metabolism               |
| 0.047817953 | Proliferation/Metastasis |
| 0.420539593 | Metabolism               |
| 0.409358991 | Proliferation/Metastasis |
| 0.861700135 | Metabolism               |
| 0.398634045 | TME                      |
| 0.906687628 | Metabolism               |
| 0.698944597 | Metabolism               |
| 0.000634421 | Metabolism               |
| 0.946484294 | Metabolism               |
| 0.463327498 | TME                      |
| 0.762638867 | TME                      |
| 0.117113892 | Proliferation/Metastasis |
| 0.297266295 | Metabolism               |
| 0.037934736 | Proliferation/Metastasis |
| 0.003415933 | Proliferation/Metastasis |
| 0.374547099 | TME                      |
| 0.086138063 | TME                      |
| 0.421432236 | TME                      |
| 0.128812924 | TME                      |
| 0.000355066 | Metabolism               |
| 0.354462136 | Proliferation/Metastasis |
| 0.001759837 | Metabolism               |
| 0.099578439 | Metabolism               |
| 0.427518926 | Proliferation/Metastasis |
| 0.75314098  | Proliferation/Metastasis |
| 0.266989475 | Metabolism               |
| 0.000256532 | Metabolism               |
| 4.34E-05    | Metabolism               |
| 0.003395026 | Metabolism               |
| 0.57555868  | TME                      |
| 0.108600871 | TME                      |
| 0.116492627 | TME                      |
| 0.095371702 | TME                      |
| 0.184668003 | TME                      |
| 0.000151164 | Metabolism               |

|             |                          |
|-------------|--------------------------|
| 0.003131081 | Metabolism               |
| 0.454454175 | Metabolism               |
| 6.29E-05    | Metabolism               |
| 0.049329555 | Metabolism               |
| 0.645944145 | TME                      |
| 0.747481975 | TME                      |
| 0.067274177 | TME                      |
| 0.142535306 | TME                      |
| 0.156424029 | TME                      |
| 0.203324439 | TME                      |
| 0.179178751 | TME                      |
| 0.377753561 | TME                      |
| 0.184723805 | TME                      |
| 0.827266748 | Proliferation/Metastasis |
| 0.335043953 | Proliferation/Metastasis |
| 0.081920416 | Metabolism               |
| 0.000839389 | Metabolism               |
| 0.115853337 | TME                      |
| 0.000268426 | Metabolism               |
| 0.123143636 | Metabolism               |
| 0.414387469 | TME                      |
| 0.927555608 | Proliferation/Metastasis |
| 0.706063415 | Proliferation/Metastasis |
| 0.143644089 | TME                      |
| 0.000957909 | Metabolism               |
| 0.004158871 | Metabolism               |
| 0.262252015 | Proliferation/Metastasis |
| 0.531246855 | Proliferation/Metastasis |
| 0.269636782 | TME                      |
| 0.012477256 | TME                      |
| 0.211049969 | TME                      |
| 0.116666037 | TME                      |
| 0.594183579 | Proliferation/Metastasis |
| 0.395615342 | TME                      |
| 0.1964526   | TME                      |
| 0.400590893 | Metabolism               |
| 0.160586398 | TME                      |
| 0.05040938  | TME                      |
| 0.208047238 | TME                      |
| 0.000453368 | TME                      |
| 0.091609834 | Metabolism               |
| 0.000247129 | Metabolism               |
| 0.020497971 | Metabolism               |

|             |                          |
|-------------|--------------------------|
| 0.180013848 | TME                      |
| 0.009113996 | Metabolism               |
| 0.178216381 | TME                      |
| 0.259144248 | TME                      |
| 0.485862857 | TME                      |
| 0.461324724 | TME                      |
| 0.560850688 | TME                      |
| 0.011337184 | Metabolism               |
| 0.482360474 | Proliferation/Metastasis |
| 0.583011709 | Metabolism               |
| 0.160882567 | Proliferation/Metastasis |
| 0.046333566 | Metabolism               |
| 0.009884319 | Metabolism               |
| 0.02078919  | Metabolism               |
| 8.51E-05    | Metabolism               |
| 0.02203227  | Metabolism               |
| 0.136189229 | Metabolism               |
| 0.118686907 | Metabolism               |
| 0.541213482 | Metabolism               |
| 0.740830138 | Metabolism               |
| 0.56507169  | Metabolism               |
| 0.504463265 | Metabolism               |
| 0.330809682 | Metabolism               |
| 0.564343597 | Metabolism               |
| 0.02408675  | Metabolism               |
| 0.158902969 | TME                      |
| 0.171628555 | Proliferation/Metastasis |
| 0.008760556 | Metabolism               |
| 0.764355136 | Proliferation/Metastasis |
| 0.183541803 | TME                      |
| 0.434927098 | Proliferation/Metastasis |
| 0.461923711 | Proliferation/Metastasis |
| 0.510197937 | TME                      |
| 0.761247672 | TME                      |
| 0.271859942 | Metabolism               |
| 0.840587667 | Metabolism               |
| 0.289632247 | Proliferation/Metastasis |
| 0.68117879  | Proliferation/Metastasis |
| 0.456761912 | Proliferation/Metastasis |
| 0.009477859 | Metabolism               |
| 0.872231304 | Metabolism               |
| 0.047930859 | Metabolism               |
| 0.89322724  | Proliferation/Metastasis |

|             |                          |
|-------------|--------------------------|
| 0.130678132 | TME                      |
| 0.713234657 | TME                      |
| 0.884106069 | Metabolism               |
| 0.175285416 | Proliferation/Metastasis |
| 0.401940132 | Metabolism               |
| 0.104757368 | TME                      |
| 0.014529606 | TME                      |
| 0.093470772 | TME                      |
| 0.11749344  | TME                      |
| 0.001982343 | Metabolism               |
| 0.18521778  | TME                      |
| 0.28944977  | Proliferation/Metastasis |
| 0.152370343 | TME                      |
| 0.78442008  | Proliferation/Metastasis |
| 0.129432987 | Proliferation/Metastasis |
| 0.64457709  | Metabolism               |
| 0.814135514 | Proliferation/Metastasis |
| 0.177218629 | TME                      |
| 0.637806691 | Metabolism               |
| 0.222971578 | TME                      |
| 0.013362719 | TME                      |
| 0.00050624  | TME                      |
| 0.193028686 | TME                      |
| 0.033763304 | TME                      |
| 0.134659276 | TME                      |
| 0.089490979 | Metabolism               |
| 0.843825953 | TME                      |
| 0.004672787 | Metabolism               |
| 0.009989479 | Metabolism               |
| 0.419002086 | Proliferation/Metastasis |
| 0.083680027 | Proliferation/Metastasis |
| 0.176413242 | Metabolism               |
| 0.667047684 | Metabolism               |
| 0.520836722 | Metabolism               |
| 0.126108406 | Metabolism               |
| 0.706885246 | Proliferation/Metastasis |
| 0.991649635 | Proliferation/Metastasis |
| 0.00993882  | Metabolism               |
| 0.002300071 | Metabolism               |
| 0.577811579 | Metabolism               |
| 0.467045603 | TME                      |
| 0.002147621 | Metabolism               |
| 0.004621946 | Metabolism               |



|             |                          |
|-------------|--------------------------|
| 0.126455959 | Metabolism               |
| 0.833003737 | Metabolism               |
| 0.835935716 | Proliferation/Metastasis |
| 0.003044835 | Metabolism               |
| 2.87E-06    | Metabolism               |
| 0.027527016 | Metabolism               |
| 0.895350821 | Metabolism               |
| 0.784037009 | Metabolism               |
| 0.015619062 | Metabolism               |
| 0.888231623 | Proliferation/Metastasis |
| 0.000449663 | Metabolism               |
| 0.057515645 | Metabolism               |
| 0.523755729 | Proliferation/Metastasis |
| 0.000689921 | Metabolism               |
| 0.087399663 | Metabolism               |
| 0.942571524 | Metabolism               |
| 0.094691963 | Metabolism               |
| 0.097626517 | Metabolism               |
| 0.007520574 | Metabolism               |
| 0.047776537 | Metabolism               |
| 0.000120981 | Metabolism               |
| 0.39552205  | TME                      |
| 0.405642995 | TME                      |
| 0.273045228 | TME                      |
| 0.247049195 | TME                      |
| 0.156810202 | TME                      |
| 0.481737801 | Metabolism               |
| 0.00237939  | Metabolism               |
| 0.362088041 | Proliferation/Metastasis |
| 0.011369686 | Metabolism               |
| 0.455581075 | Proliferation/Metastasis |
| 0.000446602 | Metabolism               |
| 0.123221063 | TME                      |
| 0.000973674 | Metabolism               |
| 0.006836104 | Metabolism               |
| 0.121877373 | Metabolism               |
| 0.001347569 | Metabolism               |
| 0.984277178 | TME                      |
| 0.150024263 | TME                      |
| 0.290175657 | Proliferation/Metastasis |
| 0.0102787   | Metabolism               |
| 0.351765266 | Proliferation/Metastasis |
| 0.032310505 | Proliferation/Metastasis |

|             |                          |
|-------------|--------------------------|
| 0.225609555 | TME                      |
| 0.661929768 | TME                      |
| 0.013599093 | TME                      |
| 0.402524324 | TME                      |
| 0.023464738 | Metabolism               |
| 0.977320936 | Proliferation/Metastasis |
| 2.14E-07    | Metabolism               |
| 0.027998911 | Metabolism               |
| 0.559780825 | Proliferation/Metastasis |
| 1.23E-06    | Proliferation/Metastasis |
| 3.44E-13    | Metabolism               |
| 0.015195328 | Metabolism               |
| 0.090148705 | Metabolism               |
| 0.867289833 | Metabolism               |
| 0.186801553 | TME                      |
| 2.50E-05    | TME                      |
| 0.73345834  | TME                      |
| 0.063590618 | TME                      |
| 4.75E-19    | TME                      |
| 0.547772631 | Metabolism               |
| 0.064468263 | Metabolism               |
| 0.007063157 | Metabolism               |
| 0.002740624 | Metabolism               |
| 0.355810734 | Metabolism               |
| 0.014908703 | TME                      |
| 0.141663217 | TME                      |
| 0.002131156 | TME                      |
| 0.188699597 | TME                      |
| 0.111340023 | TME                      |
| 0.197934787 | TME                      |
| 0.231235789 | TME                      |
| 0.307649655 | TME                      |
| 0.521507797 | TME                      |
| 0.003978548 | Proliferation/Metastasis |
| 2.09E-06    | Proliferation/Metastasis |
| 0.83035468  | Metabolism               |
| 0.225721355 | Metabolism               |
| 0.845848645 | TME                      |
| 0.000116896 | Metabolism               |
| 0.44621553  | Metabolism               |
| 0.000930712 | TME                      |
| 0.253618271 | Proliferation/Metastasis |
| 0.004292537 | Proliferation/Metastasis |

|             |                          |
|-------------|--------------------------|
| 0.147640192 | TME                      |
| 1.81E-05    | Metabolism               |
| 0.000559706 | Metabolism               |
| 0.000103494 | Proliferation/Metastasis |
| 0.000728206 | Proliferation/Metastasis |
| 0.250778885 | TME                      |
| 0.003028687 | TME                      |
| 0.183788451 | TME                      |
| 0.201771803 | TME                      |
| 0.651367515 | Proliferation/Metastasis |
| 0.235054197 | TME                      |
| 0.003506302 | TME                      |
| 2.05E-05    | Metabolism               |
| 0.043369814 | TME                      |
| 0.016893498 | TME                      |
| 0.6855269   | TME                      |
| 0.778562032 | TME                      |
| 0.840968752 | Metabolism               |
| 0.080597029 | Metabolism               |
| 0.563590686 | Metabolism               |
| 0.003043935 | TME                      |
| 0.004390694 | Metabolism               |
| 0.220123509 | TME                      |
| 0.680927167 | TME                      |
| 0.008298305 | TME                      |
| 0.608512832 | TME                      |
| 0.938423285 | TME                      |
| 0.075700039 | Metabolism               |
| 5.32E-05    | Proliferation/Metastasis |
| 0.010203829 | Metabolism               |
| 0.004026431 | Proliferation/Metastasis |
| 3.78E-07    | Metabolism               |
| 0.002193123 | Metabolism               |
| 2.44E-07    | Metabolism               |
| 0.252990399 | Metabolism               |
| 0.253135558 | Metabolism               |
| 0.000399519 | Metabolism               |
| 0.167233925 | Metabolism               |
| 2.03E-07    | Metabolism               |
| 0.000246891 | Metabolism               |
| 2.23E-06    | Metabolism               |
| 9.62E-13    | Metabolism               |
| 1.24E-05    | Metabolism               |

|             |                          |
|-------------|--------------------------|
| 0.030131909 | Metabolism               |
| 0.00020249  | Metabolism               |
| 0.009036269 | TME                      |
| 0.253947523 | Proliferation/Metastasis |
| 0.081928172 | Metabolism               |
| 4.10E-07    | Proliferation/Metastasis |
| 0.393296657 | TME                      |
| 3.77E-05    | Proliferation/Metastasis |
| 7.63E-07    | Proliferation/Metastasis |
| 0.002226236 | TME                      |
| 1.34E-06    | TME                      |
| 0.854621982 | Metabolism               |
| 0.14185159  | Metabolism               |
| 0.761837731 | Proliferation/Metastasis |
| 5.62E-05    | Proliferation/Metastasis |
| 0.000162596 | Proliferation/Metastasis |
| 2.28E-05    | Metabolism               |
| 4.82E-05    | Metabolism               |
| 8.66E-08    | Metabolism               |
| 4.56E-08    | Proliferation/Metastasis |
| 0.040207824 | TME                      |
| 0.057406693 | TME                      |
| 0.000748472 | Metabolism               |
| 5.79E-05    | Proliferation/Metastasis |
| 0.00803483  | Metabolism               |
| 0.76183901  | TME                      |
| 0.587770156 | TME                      |
| 1.70E-06    | TME                      |
| 0.00255277  | TME                      |
| 1.15E-05    | Metabolism               |
| 0.047281237 | TME                      |
| 0.093459227 | Proliferation/Metastasis |
| 2.64E-07    | TME                      |
| 0.854844769 | Proliferation/Metastasis |
| 0.526286219 | Proliferation/Metastasis |
| 0.148914411 | Metabolism               |
| 0.001025014 | Proliferation/Metastasis |
| 0.018437477 | TME                      |
| 0.666521825 | Metabolism               |
| 0.316241886 | TME                      |
| 0.667767329 | TME                      |
| 0.130083352 | TME                      |
| 0.040277044 | TME                      |

|             |                          |
|-------------|--------------------------|
| 0.030559121 | TME                      |
| 0.371445616 | TME                      |
| 0.001279409 | Metabolism               |
| 1.40E-08    | TME                      |
| 0.008372131 | Metabolism               |
| 0.074022552 | Metabolism               |
| 0.000144329 | Proliferation/Metastasis |
| 0.054073724 | Proliferation/Metastasis |
| 0.001547389 | Metabolism               |
| 0.770783399 | Metabolism               |
| 0.427794292 | Metabolism               |
| 0.28061958  | Metabolism               |
| 7.14E-05    | Proliferation/Metastasis |
| 0.972590383 | Proliferation/Metastasis |
| 0.084284546 | Metabolism               |
| 0.507964917 | Metabolism               |
| 0.170664934 | Metabolism               |
| 9.97E-05    | TME                      |
| 6.19E-07    | Metabolism               |
| 0.071679491 | Metabolism               |
| 0.879079075 | Metabolism               |
| 0.294869504 | Metabolism               |
| 0.101339349 | Proliferation/Metastasis |
| 0.680413272 | Metabolism               |
| 0.149840539 | Metabolism               |
| 6.82E-05    | Metabolism               |
| 0.020874144 | Metabolism               |
| 0.027927657 | Metabolism               |
| 0.035353557 | Metabolism               |
| 0.244854699 | Proliferation/Metastasis |
| 0.000516203 | Metabolism               |
| 0.934372837 | Metabolism               |
| 9.89E-06    | Proliferation/Metastasis |
| 0.004382596 | Metabolism               |
| 0.015554071 | Metabolism               |
| 0.000127299 | Metabolism               |
| 0.997125099 | Metabolism               |
| 0.902456891 | Metabolism               |
| 2.82E-07    | Metabolism               |
| 0.182866984 | Metabolism               |
| 0.030887339 | Metabolism               |
| 0.008461489 | TME                      |
| 0.011918892 | TME                      |

|             |                          |
|-------------|--------------------------|
| 0.003626229 | TME                      |
| 0.008536056 | TME                      |
| 0.037623901 | TME                      |
| 0.013779532 | Metabolism               |
| 0.804727764 | Metabolism               |
| 0.969540485 | Proliferation/Metastasis |
| 8.57E-09    | Metabolism               |
| 1.84E-06    | Proliferation/Metastasis |
| 0.918377782 | Metabolism               |
| 0.046953482 | TME                      |
| 6.31E-05    | Metabolism               |
| 0.816459842 | Metabolism               |
| 0.08069172  | Metabolism               |
| 0.001353613 | Metabolism               |
| 0.004201934 | TME                      |
| 0.021651505 | TME                      |
| 8.06E-11    | Proliferation/Metastasis |
| 0.686498398 | Metabolism               |
| 0.993800492 | Proliferation/Metastasis |
| 0.509862437 | Proliferation/Metastasis |
| 0.062406047 | TME                      |
| 0.895333231 | TME                      |
| 0.47293742  | TME                      |
| 0.746032929 | TME                      |
| 0.846366453 | Metabolism               |
| 0.816357388 | Proliferation/Metastasis |
| 0.225180638 | Metabolism               |
| 0.033399644 | Metabolism               |
| 0.038608904 | Proliferation/Metastasis |
| 0.081762129 | Proliferation/Metastasis |
| 0.008015871 | Metabolism               |
| 0.093494645 | Metabolism               |
| 0.45217697  | Metabolism               |
| 0.183612419 | Metabolism               |
| 0.811845794 | TME                      |
| 0.899194487 | TME                      |
| 0.30713395  | TME                      |
| 0.451397693 | TME                      |
| 0.26599092  | TME                      |
| 0.50206871  | Metabolism               |
| 0.660029339 | Metabolism               |
| 0.0167176   | Metabolism               |
| 0.132195692 | Metabolism               |

|             |                          |
|-------------|--------------------------|
| 0.003502594 | Metabolism               |
| 0.040042792 | TME                      |
| 0.00045717  | TME                      |
| 0.523358936 | TME                      |
| 0.142444697 | TME                      |
| 0.645198893 | TME                      |
| 0.435328118 | TME                      |
| 0.404026532 | TME                      |
| 0.321743066 | TME                      |
| 0.775355683 | TME                      |
| 0.000254244 | Proliferation/Metastasis |
| 4.41E-12    | Proliferation/Metastasis |
| 0.276513087 | Metabolism               |
| 0.694702416 | Metabolism               |
| 0.089213765 | TME                      |
| 0.184879801 | Metabolism               |
| 0.000331143 | Metabolism               |
| 0.402754198 | TME                      |
| 0.008565749 | Proliferation/Metastasis |
| 0.933577073 | Proliferation/Metastasis |
| 0.00167516  | TME                      |
| 0.645415271 | Metabolism               |
| 0.835565816 | Metabolism               |
| 7.80E-06    | Proliferation/Metastasis |
| 0.063172028 | Proliferation/Metastasis |
| 0.017922911 | TME                      |
| 0.319657196 | TME                      |
| 0.250152245 | TME                      |
| 0.058766287 | TME                      |
| 9.58E-05    | Proliferation/Metastasis |
| 0.228840454 | TME                      |
| 0.816241384 | TME                      |
| 0.074631843 | Metabolism               |
| 0.012648594 | TME                      |
| 0.26077731  | TME                      |
| 0.884634648 | TME                      |
| 1.88E-06    | TME                      |
| 0.005411771 | Metabolism               |
| 0.073752605 | Metabolism               |
| 0.275982957 | Metabolism               |
| 0.444532396 | TME                      |
| 0.013355706 | Metabolism               |
| 0.51491875  | TME                      |

|             |                          |
|-------------|--------------------------|
| 0.308190042 | TME                      |
| 0.907937271 | TME                      |
| 0.00960205  | TME                      |
| 0.005797549 | TME                      |
| 0.00011773  | Metabolism               |
| 4.31E-07    | Proliferation/Metastasis |
| 3.17E-05    | Metabolism               |
| 0.007226079 | Proliferation/Metastasis |
| 0.594232231 | Metabolism               |
| 0.171255579 | Metabolism               |
| 0.05864334  | Metabolism               |
| 7.48E-09    | Metabolism               |
| 0.113116795 | Metabolism               |
| 5.14E-10    | Metabolism               |
| 0.015605458 | Metabolism               |
| 0.107145096 | Metabolism               |
| 8.17E-06    | Metabolism               |
| 4.60E-06    | Metabolism               |
| 0.003084472 | Metabolism               |
| 0.285796622 | Metabolism               |
| 0.05493326  | Metabolism               |
| 0.058202129 | Metabolism               |
| 0.404166935 | TME                      |
| 0.020658088 | Proliferation/Metastasis |
| 0.301889702 | Metabolism               |
| 0.319578426 | Proliferation/Metastasis |
| 0.866111965 | TME                      |
| 0.634945985 | Proliferation/Metastasis |
| 0.198190818 | Proliferation/Metastasis |
| 0.819056576 | TME                      |
| 0.094788615 | TME                      |
| 3.05E-05    | Metabolism               |
| 0.000127742 | Metabolism               |
| 0.528536899 | Proliferation/Metastasis |
| 0.049572415 | Proliferation/Metastasis |
| 0.266678223 | Proliferation/Metastasis |
| 0.587942797 | Metabolism               |
| 0.27400464  | Metabolism               |
| 0.285898933 | Metabolism               |
| 0.000292487 | Proliferation/Metastasis |
| 0.184641206 | TME                      |
| 0.513766008 | TME                      |
| 1.59E-06    | Metabolism               |



|             |                          |
|-------------|--------------------------|
| 0.597675887 | Proliferation/Metastasis |
| 2.03E-06    | Metabolism               |
| 0.640792003 | TME                      |
| 0.756171667 | TME                      |
| 0.004844582 | TME                      |
| 0.960167113 | TME                      |
| 0.243897086 | Metabolism               |
| 0.000502971 | TME                      |
| 0.004270847 | Proliferation/Metastasis |
| 0.341096804 | TME                      |
| 0.044384189 | Proliferation/Metastasis |
| 6.68E-08    | Proliferation/Metastasis |
| 1.26E-05    | Metabolism               |
| 8.47E-05    | Proliferation/Metastasis |
| 0.881120136 | TME                      |
| 0.041008645 | Metabolism               |
| 0.078080356 | TME                      |
| 0.585053618 | TME                      |
| 0.796798726 | TME                      |
| 0.998405262 | TME                      |
| 3.24E-07    | TME                      |
| 0.312617039 | TME                      |
| 0.001162393 | Metabolism               |
| 0.146197581 | TME                      |
| 0.459449754 | Metabolism               |
| 0.124281657 | Metabolism               |
| 0.000189581 | Proliferation/Metastasis |
| 0.007426753 | Proliferation/Metastasis |
| 0.004330576 | Metabolism               |
| 4.43E-07    | Metabolism               |
| 5.43E-16    | Metabolism               |
| 0.072124397 | Metabolism               |
| 0.361878915 | Proliferation/Metastasis |
| 3.93E-13    | Proliferation/Metastasis |
| 0.000776074 | Metabolism               |
| 0.40588634  | Metabolism               |
| 0.081268189 | Metabolism               |
| 0.109756494 | TME                      |
| 3.63E-05    | Metabolism               |
| 0.87415329  | Metabolism               |
| 0.004689011 | Metabolism               |
| 0.281709826 | Metabolism               |
| 0.000613909 | Proliferation/Metastasis |

|             |                          |
|-------------|--------------------------|
| 0.105572325 | Metabolism               |
| 0.000100681 | Metabolism               |
| 3.17E-06    | Metabolism               |
| 0.061691933 | Metabolism               |
| 0.015203339 | Metabolism               |
| 0.597230897 | Metabolism               |
| 0.000788677 | Proliferation/Metastasis |
| 0.216694848 | Metabolism               |
| 0.000208015 | Metabolism               |
| 9.38E-06    | Proliferation/Metastasis |
| 0.054147668 | Metabolism               |
| 1.19E-06    | Metabolism               |
| 0.052556558 | Metabolism               |
| 0.496567632 | Metabolism               |
| 0.354990956 | Metabolism               |
| 0.206458846 | Metabolism               |
| 0.005527443 | Metabolism               |
| 0.821771786 | Metabolism               |
| 0.974683294 | TME                      |
| 0.379596922 | TME                      |
| 0.104621209 | TME                      |
| 0.911967176 | TME                      |
| 0.89473966  | TME                      |
| 0.001458052 | Metabolism               |
| 1.81E-05    | Metabolism               |
| 0.407350837 | Proliferation/Metastasis |
| 0.005207424 | Metabolism               |
| 0.043019924 | Proliferation/Metastasis |
| 0.57211915  | Metabolism               |
| 0.023037047 | TME                      |
| 1.35E-09    | Metabolism               |
| 0.253621311 | Metabolism               |
| 0.053016883 | Metabolism               |
| 0.037884801 | Metabolism               |
| 1.39E-05    | TME                      |
| 0.002478645 | TME                      |
| 0.873981008 | Proliferation/Metastasis |
| 0.153627038 | Metabolism               |
| 0.010765804 | Proliferation/Metastasis |
| 2.37E-07    | Proliferation/Metastasis |
| 0.425718783 | TME                      |
| 0.877439645 | TME                      |
| 0.058318347 | TME                      |

|             |                          |
|-------------|--------------------------|
| 0.760000907 | TME                      |
| 6.85E-17    | Metabolism               |
| 1.08E-18    | Proliferation/Metastasis |
| 0.759045277 | Metabolism               |
| 4.76E-09    | Metabolism               |
| 6.42E-12    | Proliferation/Metastasis |
| 0.50795448  | Proliferation/Metastasis |
| 0.92014974  | Metabolism               |
| 4.96E-25    | Metabolism               |
| 3.67E-13    | Metabolism               |
| 0.058413432 | Metabolism               |
| 0.142261477 | TME                      |
| 0.000703359 | TME                      |
| 0.412430955 | TME                      |
| 0.066069573 | TME                      |
| 0.106795397 | TME                      |
| 0.000565748 | Metabolism               |
| 3.63E-10    | Metabolism               |
| 0.01750058  | Metabolism               |
| 0.001303872 | Metabolism               |
| 0.557510201 | Metabolism               |
| 0.003461158 | TME                      |
| 0.052763523 | TME                      |
| 0.282460575 | TME                      |
| 0.588680813 | TME                      |
| 0.124728598 | TME                      |
| 0.012877564 | TME                      |
| 0.047298053 | TME                      |
| 0.388983486 | TME                      |
| 0.83649321  | TME                      |
| 5.17E-14    | Proliferation/Metastasis |
| 0.000120947 | Proliferation/Metastasis |
| 3.87E-17    | Metabolism               |
| 3.57E-20    | Metabolism               |
| 0.510240739 | TME                      |
| 0.695091529 | Metabolism               |
| 0.00015191  | Metabolism               |
| 0.152028924 | TME                      |
| 2.66E-29    | Proliferation/Metastasis |
| 2.70E-24    | Proliferation/Metastasis |
| 0.397972837 | TME                      |
| 0.327068054 | Metabolism               |
| 4.28E-12    | Metabolism               |

|             |                          |
|-------------|--------------------------|
| 2.70E-16    | Proliferation/Metastasis |
| 0.940478559 | Proliferation/Metastasis |
| 0.000441838 | TME                      |
| 0.477241052 | TME                      |
| 0.010038195 | TME                      |
| 4.03E-05    | TME                      |
| 2.63E-13    | Proliferation/Metastasis |
| 0.306021021 | TME                      |
| 0.397798848 | TME                      |
| 0.13787783  | Metabolism               |
| 0.016413918 | TME                      |
| 0.151698077 | TME                      |
| 0.635364833 | TME                      |
| 0.00081568  | TME                      |
| 4.42E-07    | Metabolism               |
| 0.005924719 | Metabolism               |
| 9.55E-13    | Metabolism               |
| 0.001086132 | TME                      |
| 3.17E-11    | Metabolism               |
| 0.295859037 | TME                      |
| 0.95009577  | TME                      |
| 0.161826653 | TME                      |
| 0.007650873 | TME                      |
| 4.58E-05    | TME                      |
| 8.84E-17    | Metabolism               |
| 1.65E-13    | Proliferation/Metastasis |
| 3.42E-11    | Metabolism               |
| 0.417945274 | Proliferation/Metastasis |
| 1.32E-07    | Metabolism               |
| 0.008618925 | Metabolism               |
| 0.593005318 | Metabolism               |
| 1.54E-22    | Metabolism               |
| 5.83E-19    | Metabolism               |
| 0.507068364 | Metabolism               |
| 0.967020799 | Metabolism               |
| 0.040160346 | Metabolism               |
| 0.247849556 | Metabolism               |
| 0.05075534  | Metabolism               |
| 0.694479442 | Metabolism               |
| 0.289822073 | Metabolism               |
| 0.030530224 | Metabolism               |
| 8.51E-17    | Metabolism               |
| 0.076067834 | TME                      |

|             |                          |
|-------------|--------------------------|
| 0.110684778 | Proliferation/Metastasis |
| 1.28E-07    | Metabolism               |
| 0.188061688 | Proliferation/Metastasis |
| 0.884835133 | TME                      |
| 0.957349561 | Proliferation/Metastasis |
| 0.016798839 | Proliferation/Metastasis |
| 0.521820566 | TME                      |
| 0.164050465 | TME                      |
| 0.001898041 | Metabolism               |
| 0.216446727 | Metabolism               |
| 8.43E-07    | Proliferation/Metastasis |
| 4.68E-21    | Proliferation/Metastasis |
| 0.127722432 | Proliferation/Metastasis |
| 0.727904198 | Metabolism               |
| 0.035411492 | Metabolism               |
| 7.58E-13    | Metabolism               |
| 0.39162963  | Proliferation/Metastasis |
| 0.161377317 | TME                      |
| 0.062131917 | TME                      |
| 0.001142708 | Metabolism               |
| 0.284922347 | Proliferation/Metastasis |
| 0.931983025 | Metabolism               |
| 0.41756814  | TME                      |
| 0.236840828 | TME                      |
| 0.554723194 | TME                      |
| 0.000435924 | TME                      |
| 0.19787042  | Metabolism               |
| 0.992575469 | TME                      |
| 0.015727011 | Proliferation/Metastasis |
| 0.020040651 | TME                      |
| 0.867676236 | Proliferation/Metastasis |
| 4.09E-17    | Proliferation/Metastasis |
| 0.036195914 | Metabolism               |
| 5.33E-21    | Proliferation/Metastasis |
| 0.082293349 | TME                      |
| 1.69E-05    | Metabolism               |
| 0.389762509 | TME                      |
| 0.000319767 | TME                      |
| 0.012930847 | TME                      |
| 0.804721218 | TME                      |
| 0.106184752 | TME                      |
| 0.021210952 | TME                      |
| 0.000486426 | Metabolism               |

|             |                          |
|-------------|--------------------------|
| 0.869800748 | TME                      |
| 0.441946601 | Metabolism               |
| 0.184487594 | Metabolism               |
| 0.017047268 | Proliferation/Metastasis |
| 0.00039302  | Proliferation/Metastasis |
| 8.23E-22    | Metabolism               |
| 0.521775588 | Metabolism               |
| 0.038063087 | Metabolism               |
| 9.83E-12    | Metabolism               |
| 0.001296079 | Proliferation/Metastasis |
| 0.234121892 | Proliferation/Metastasis |
| 0.042651149 | Metabolism               |
| 0.121929228 | Metabolism               |
| 4.01E-16    | Metabolism               |
| 0.001316666 | TME                      |
| 4.45E-10    | Metabolism               |
| 6.14E-08    | Metabolism               |
| 0.656051171 | Metabolism               |
| 0.001722039 | Metabolism               |
| 0.059440239 | Proliferation/Metastasis |
| 2.44E-12    | Metabolism               |
| 0.106237563 | Metabolism               |
| 0.022943536 | Metabolism               |
| 5.57E-42    | Metabolism               |
| 1.08E-40    | Metabolism               |
| 1.02E-14    | Metabolism               |
| 2.23E-11    | Proliferation/Metastasis |
| 0.090044876 | Metabolism               |
| 7.47E-09    | Metabolism               |
| 4.58E-10    | Proliferation/Metastasis |
| 1.21E-19    | Metabolism               |
| 0.210624027 | Metabolism               |
| 0.132553082 | Metabolism               |
| 0.755407048 | Metabolism               |
| 4.04E-06    | Metabolism               |
| 0.675731579 | Metabolism               |
| 2.17E-05    | Metabolism               |
| 2.63E-06    | Metabolism               |
| 0.113503797 | TME                      |
| 0.789417138 | TME                      |
| 0.030481293 | TME                      |
| 0.421152281 | TME                      |
| 1.16E-05    | TME                      |

|             |                          |
|-------------|--------------------------|
| 0.571549493 | Metabolism               |
| 1.97E-09    | Metabolism               |
| 0.127768521 | Proliferation/Metastasis |
| 5.35E-16    | Metabolism               |
| 0.398989048 | Proliferation/Metastasis |
| 2.64E-07    | Metabolism               |
| 0.000125811 | TME                      |
| 5.48E-10    | Metabolism               |
| 6.19E-15    | Metabolism               |
| 0.003990555 | Metabolism               |
| 8.99E-05    | Metabolism               |
| 0.291893234 | TME                      |
| 0.082863471 | TME                      |
| 0.014916641 | Proliferation/Metastasis |
| 0.000341553 | Metabolism               |
| 7.02E-05    | Proliferation/Metastasis |
| 0.007806794 | Proliferation/Metastasis |
| 0.006194236 | TME                      |
| 4.65E-10    | TME                      |
| 5.86E-08    | TME                      |
| 2.56E-11    | TME                      |
| 0.492137648 | Metabolism               |
| 9.22E-06    | Proliferation/Metastasis |
| 0.01035407  | Metabolism               |
| 2.35E-07    | Metabolism               |
| 0.000334476 | Proliferation/Metastasis |
| 0.000600577 | Proliferation/Metastasis |
| 0.215093684 | Metabolism               |
| 0.651569917 | Metabolism               |
| 0.939734623 | Metabolism               |
| 0.000485277 | Metabolism               |
| 0.030885844 | TME                      |
| 1.05E-12    | TME                      |
| 1.21E-18    | TME                      |
| 0.003938017 | TME                      |
| 0.001209242 | TME                      |
| 3.62E-13    | Metabolism               |
| 0.869518993 | Metabolism               |
| 4.91E-05    | Metabolism               |
| 4.52E-05    | Metabolism               |
| 0.000387941 | Metabolism               |
| 7.79E-16    | TME                      |
| 1.07E-17    | TME                      |

|             |                          |
|-------------|--------------------------|
| 4.20E-11    | TME                      |
| 0.001032483 | TME                      |
| 1.02E-05    | TME                      |
| 1.65E-10    | TME                      |
| 1.30E-10    | TME                      |
| 0.000364745 | TME                      |
| 1.98E-10    | TME                      |
| 6.96E-06    | Proliferation/Metastasis |
| 0.004002973 | Proliferation/Metastasis |
| 0.180592526 | Metabolism               |
| 0.783433191 | Metabolism               |
| 3.03E-05    | TME                      |
| 0.198216673 | Metabolism               |
| 0.557995937 | Metabolism               |
| 9.72E-07    | TME                      |
| 0.117001965 | Proliferation/Metastasis |
| 0.507611385 | Proliferation/Metastasis |
| 0.435698439 | TME                      |
| 0.00052905  | Metabolism               |
| 0.783318114 | Metabolism               |
| 4.74E-05    | Proliferation/Metastasis |
| 0.009137139 | Proliferation/Metastasis |
| 1.51E-12    | TME                      |
| 3.09E-09    | TME                      |
| 2.14E-12    | TME                      |
| 3.34E-12    | TME                      |
| 0.009712999 | Proliferation/Metastasis |
| 1.41E-17    | TME                      |
| 2.44E-07    | TME                      |
| 3.17E-06    | Metabolism               |
| 2.23E-25    | TME                      |
| 6.12E-20    | TME                      |
| 1.17E-09    | TME                      |
| 0.238687096 | TME                      |
| 0.604808657 | Metabolism               |
| 0.00028195  | Metabolism               |
| 9.66E-08    | Metabolism               |
| 7.97E-08    | TME                      |
| 0.711234977 | Metabolism               |
| 4.12E-06    | TME                      |
| 2.40E-05    | TME                      |
| 1.29E-06    | TME                      |
| 0.312189169 | TME                      |



|             |                          |
|-------------|--------------------------|
| 0.944939395 | TME                      |
| 0.704464547 | Metabolism               |
| 2.62E-08    | Proliferation/Metastasis |
| 0.925197641 | Metabolism               |
| 0.254053363 | Proliferation/Metastasis |
| 0.135337565 | Metabolism               |
| 0.04185991  | Metabolism               |
| 4.88E-07    | Metabolism               |
| 0.046496375 | Metabolism               |
| 0.781802032 | Metabolism               |
| 0.47269801  | Metabolism               |
| 0.777189852 | Metabolism               |
| 5.88E-08    | Metabolism               |
| 0.380665313 | Metabolism               |
| 0.007017479 | Metabolism               |
| 0.054780327 | Metabolism               |
| 7.80E-08    | Metabolism               |
| 0.485770075 | Metabolism               |
| 0.917711103 | Metabolism               |
| 5.49E-10    | TME                      |
| 0.298130577 | Proliferation/Metastasis |
| 4.36E-05    | Metabolism               |
| 7.28E-05    | Proliferation/Metastasis |
| 5.67E-08    | TME                      |
| 7.53E-10    | Proliferation/Metastasis |
| 1.69E-11    | Proliferation/Metastasis |
| 1.58E-11    | TME                      |
| 0.000273819 | TME                      |
| 3.62E-10    | Metabolism               |
| 9.34E-13    | Metabolism               |
| 3.31E-10    | Proliferation/Metastasis |
| 0.012667517 | Proliferation/Metastasis |
| 2.68E-13    | Proliferation/Metastasis |
| 0.362060304 | Metabolism               |
| 0.009756147 | Metabolism               |
| 0.234377251 | Metabolism               |
| 0.014329136 | Proliferation/Metastasis |
| 3.59E-13    | TME                      |
| 1.98E-16    | TME                      |
| 0.028182003 | Metabolism               |
| 2.34E-05    | Proliferation/Metastasis |
| 2.00E-21    | Metabolism               |
| 9.86E-13    | TME                      |

|             |                          |
|-------------|--------------------------|
| 9.38E-14    | TME                      |
| 0.018829379 | TME                      |
| 7.61E-10    | TME                      |
| 0.013806742 | Metabolism               |
| 1.01E-07    | TME                      |
| 3.38E-05    | Proliferation/Metastasis |
| 1.47E-15    | TME                      |
| 0.774009027 | Proliferation/Metastasis |
| 5.55E-12    | Proliferation/Metastasis |
| 1.72E-23    | Metabolism               |
| 0.020802482 | Proliferation/Metastasis |
| 1.04E-09    | TME                      |
| 0.010206449 | Metabolism               |
| 0.061958551 | TME                      |
| 4.55E-05    | TME                      |
| 0.147258639 | TME                      |
| 3.72E-11    | TME                      |
| 6.43E-21    | TME                      |
| 3.06E-13    | TME                      |
| 0.521272779 | Metabolism               |
| 3.11E-12    | TME                      |
| 0.07837048  | Metabolism               |
| 2.70E-12    | Metabolism               |
| 2.43E-09    | Proliferation/Metastasis |
| 0.178506639 | Proliferation/Metastasis |
| 9.49E-06    | Metabolism               |
| 2.56E-05    | Metabolism               |
| 3.74E-34    | Metabolism               |
| 0.810867249 | Metabolism               |
| 0.00223402  | Proliferation/Metastasis |
| 1.12E-22    | Proliferation/Metastasis |
| 2.16E-22    | Metabolism               |
| 0.01585085  | Metabolism               |
| 0.018153546 | Metabolism               |
| 0.00049002  | TME                      |
| 0.182824026 | Metabolism               |
| 0.6677653   | Metabolism               |
| 0.044343684 | Metabolism               |
| 1.53E-08    | Metabolism               |
| 7.59E-11    | Proliferation/Metastasis |
| 0.004222245 | Metabolism               |
| 0.000240665 | Metabolism               |
| 1.63E-09    | Metabolism               |

|             |                          |
|-------------|--------------------------|
| 0.602800653 | Metabolism               |
| 0.045015567 | Metabolism               |
| 0.882163247 | Metabolism               |
| 0.376875017 | Proliferation/Metastasis |
| 0.002346811 | Metabolism               |
| 0.117476925 | Metabolism               |
| 4.98E-23    | Proliferation/Metastasis |
| 0.0612694   | Metabolism               |
| 0.005644392 | Metabolism               |
| 2.72E-13    | Metabolism               |
| 2.76E-05    | Metabolism               |
| 0.000262053 | Metabolism               |
| 0.203436095 | Metabolism               |
| 1.14E-06    | Metabolism               |
| 0.025114301 | Metabolism               |
| 3.34E-10    | TME                      |
| 7.82E-11    | TME                      |
| 2.04E-07    | TME                      |
| 2.47E-07    | TME                      |
| 0.000137336 | TME                      |
| 2.92E-16    | Metabolism               |
| 2.18E-09    | Metabolism               |
| 3.29E-07    | Proliferation/Metastasis |
| 0.328082042 | Metabolism               |
| 1.98E-09    | Proliferation/Metastasis |
| 3.79E-06    | Metabolism               |
| 0.247982376 | TME                      |
| 0.434322547 | Metabolism               |
| 1.97E-09    | Metabolism               |
| 3.17E-06    | Metabolism               |
| 4.69E-10    | Metabolism               |
| 0.913322609 | TME                      |
| 0.839216517 | TME                      |
| 0.00014575  | Proliferation/Metastasis |
| 0.011237179 | Metabolism               |
| 0.056334369 | Proliferation/Metastasis |
| 2.06E-09    | Proliferation/Metastasis |
| 0.208045159 | TME                      |
| 0.418756159 | TME                      |
| 2.44E-06    | TME                      |
| 4.47E-06    | TME                      |
| 0.078153007 | Metabolism               |
| 0.000462812 | Proliferation/Metastasis |

|             |                          |
|-------------|--------------------------|
| 0.483636766 | Metabolism               |
| 1.29E-08    | Metabolism               |
| 0.373788609 | Proliferation/Metastasis |
| 2.46E-05    | Proliferation/Metastasis |
| 5.57E-08    | Metabolism               |
| 0.108266004 | Metabolism               |
| 0.008428111 | Metabolism               |
| 0.046886546 | Metabolism               |
| 0.788630799 | TME                      |
| 0.000357087 | TME                      |
| 0.014874681 | TME                      |
| 0.000110153 | TME                      |
| 4.18E-20    | TME                      |
| 0.127498673 | Metabolism               |
| 0.478676321 | Metabolism               |
| 0.142549574 | Metabolism               |
| 0.000572127 | Metabolism               |
| 0.963884908 | Metabolism               |
| 0.024814975 | TME                      |
| 0.750897155 | TME                      |
| 1.37E-09    | TME                      |
| 0.008294211 | TME                      |
| 3.34E-06    | TME                      |
| 1.04E-05    | TME                      |
| 6.27E-06    | TME                      |
| 9.50E-06    | TME                      |
| 3.98E-05    | TME                      |
| 0.003552569 | Proliferation/Metastasis |
| 2.26E-14    | Proliferation/Metastasis |
| 0.822337864 | Metabolism               |
| 0.097811661 | Metabolism               |
| 0.006729908 | TME                      |
| 3.27E-05    | Metabolism               |
| 0.763610571 | Metabolism               |
| 1.42E-07    | TME                      |
| 0.204599085 | Proliferation/Metastasis |
| 0.262873683 | Proliferation/Metastasis |
| 0.021186264 | TME                      |
| 0.031668101 | Metabolism               |
| 0.000105234 | Metabolism               |
| 0.000429517 | Proliferation/Metastasis |
| 0.043560314 | Proliferation/Metastasis |
| 0.001722592 | TME                      |

|             |                          |
|-------------|--------------------------|
| 2.56E-10    | TME                      |
| 7.54E-05    | TME                      |
| 7.27E-05    | TME                      |
| 0.004571753 | Proliferation/Metastasis |
| 0.034078854 | TME                      |
| 3.53E-11    | TME                      |
| 0.041559542 | Metabolism               |
| 7.19E-09    | TME                      |
| 4.20E-12    | TME                      |
| 6.70E-06    | TME                      |
| 0.18596518  | TME                      |
| 5.99E-05    | Metabolism               |
| 0.067616023 | Metabolism               |
| 0.013389362 | Metabolism               |
| 0.002874089 | TME                      |
| 0.025338386 | Metabolism               |
| 0.000121437 | TME                      |
| 0.134621456 | TME                      |
| 2.11E-06    | TME                      |
| 0.000240034 | TME                      |
| 0.170798113 | TME                      |
| 6.89E-05    | Metabolism               |
| 4.39E-06    | Proliferation/Metastasis |
| 1.22E-06    | Metabolism               |
| 0.299603688 | Proliferation/Metastasis |
| 1.22E-08    | Metabolism               |
| 0.478125579 | Metabolism               |
| 0.003569461 | Metabolism               |
| 0.001349397 | Metabolism               |
| 0.024828407 | Metabolism               |
| 1.37E-09    | Metabolism               |
| 0.219214296 | Metabolism               |
| 4.53E-17    | Metabolism               |
| 4.26E-07    | Metabolism               |
| 1.63E-10    | Metabolism               |
| 6.15E-13    | Metabolism               |
| 6.68E-09    | Metabolism               |
| 3.10E-05    | Metabolism               |
| 0.172826459 | Metabolism               |
| 4.30E-08    | TME                      |
| 0.04424624  | Proliferation/Metastasis |
| 0.088288052 | Metabolism               |
| 6.46E-13    | Proliferation/Metastasis |

|             |                          |
|-------------|--------------------------|
| 4.83E-05    | TME                      |
| 4.27E-10    | Proliferation/Metastasis |
| 2.73E-15    | Proliferation/Metastasis |
| 1.31E-10    | TME                      |
| 9.19E-19    | TME                      |
| 0.015374138 | Metabolism               |
| 0.00098651  | Metabolism               |
| 0.329921223 | Proliferation/Metastasis |
| 9.77E-10    | Proliferation/Metastasis |
| 3.64E-06    | Proliferation/Metastasis |
| 0.953028169 | Metabolism               |
| 0.012749384 | Metabolism               |
| 6.36E-14    | Metabolism               |
| 5.58E-14    | Proliferation/Metastasis |
| 6.48E-09    | TME                      |
| 7.62E-10    | TME                      |
| 0.297747848 | Metabolism               |
| 2.68E-05    | Proliferation/Metastasis |
| 5.89E-05    | Metabolism               |
| 0.050513938 | TME                      |
| 0.111952059 | TME                      |
| 1.64E-07    | TME                      |
| 0.000339752 | TME                      |
| 0.000407188 | Metabolism               |
| 0.149947385 | TME                      |
| 0.000140647 | Proliferation/Metastasis |
| 9.50E-19    | TME                      |
| 0.633604273 | Proliferation/Metastasis |
| 0.030082199 | Proliferation/Metastasis |
| 0.850359779 | Metabolism               |
| 0.000459242 | Proliferation/Metastasis |
| 1.83E-06    | TME                      |
| 0.580475064 | Metabolism               |
| 0.155717296 | TME                      |
| 0.586829955 | TME                      |
| 1.07E-06    | TME                      |
| 5.15E-09    | TME                      |
| 0.529911031 | TME                      |
| 6.41E-05    | TME                      |
| 1.14E-06    | Metabolism               |
| 8.96E-16    | TME                      |
| 0.127138217 | Metabolism               |
| 8.97E-05    | Metabolism               |

|             |                          |
|-------------|--------------------------|
| 1.18E-09    | Proliferation/Metastasis |
| 0.622073968 | Proliferation/Metastasis |
| 0.026626811 | Metabolism               |
| 0.855345831 | Metabolism               |
| 0.267076402 | Metabolism               |
| 1.89E-05    | Metabolism               |
| 2.41E-10    | Proliferation/Metastasis |
| 0.685795361 | Proliferation/Metastasis |
| 1.44E-06    | Metabolism               |
| 0.126817094 | Metabolism               |
| 0.252553985 | Metabolism               |
| 0.012375038 | TME                      |
| 5.92E-06    | Metabolism               |
| 0.102416291 | Metabolism               |
| 0.287571505 | Metabolism               |
| 0.755350042 | Metabolism               |
| 0.000132285 | Proliferation/Metastasis |
| 0.000244189 | Metabolism               |
| 0.046509923 | Metabolism               |
| 1.82E-09    | Metabolism               |
| 0.798518208 | Metabolism               |
| 0.705055748 | Metabolism               |
| 0.013239069 | Metabolism               |
| 6.79E-05    | Proliferation/Metastasis |
| 0.127988623 | Metabolism               |
| 0.00067084  | Metabolism               |
| 0.00801745  | Proliferation/Metastasis |
| 0.002064189 | Metabolism               |
| 0.000455033 | Metabolism               |
| 4.45E-07    | Metabolism               |
| 0.708347503 | Metabolism               |
| 0.076532269 | Metabolism               |
| 0.030084703 | Metabolism               |
| 0.915417331 | Metabolism               |
| 6.59E-05    | Metabolism               |
| 3.51E-06    | TME                      |
| 8.40E-10    | TME                      |
| 1.81E-10    | TME                      |
| 4.05E-08    | TME                      |
| 2.84E-09    | TME                      |
| 0.797452161 | Metabolism               |
| 0.252302426 | Metabolism               |
| 0.001739107 | Proliferation/Metastasis |

|             |                          |
|-------------|--------------------------|
| 2.40E-05    | Metabolism               |
| 2.31E-18    | Proliferation/Metastasis |
| 0.014413316 | Metabolism               |
| 0.000202749 | TME                      |
| 0.005892045 | Metabolism               |
| 0.010726367 | Metabolism               |
| 2.10E-14    | Metabolism               |
| 0.013952284 | Metabolism               |
| 0.004168349 | TME                      |
| 0.98598009  | TME                      |
| 9.64E-10    | Proliferation/Metastasis |
| 0.69729171  | Metabolism               |
| 0.163722455 | Proliferation/Metastasis |
| 2.94E-09    | Proliferation/Metastasis |
| 0.00316396  | TME                      |
| 0.021366298 | TME                      |
| 0.288805148 | TME                      |
| 0.005662922 | TME                      |
| 0.549122089 | Metabolism               |
| 0.005363785 | Proliferation/Metastasis |
| 0.070121511 | Metabolism               |
| 0.920798592 | Metabolism               |
| 0.003703606 | Proliferation/Metastasis |
| 0.203860812 | Proliferation/Metastasis |
| 0.358264386 | Metabolism               |
| 0.026132774 | Metabolism               |
| 0.367266914 | Metabolism               |
| 0.649925639 | Metabolism               |
| 0.004417817 | TME                      |
| 0.032725999 | TME                      |
| 0.000433268 | TME                      |
| 0.062177488 | TME                      |
| 0.540421058 | TME                      |
| 0.278701028 | Metabolism               |
| 0.587070806 | Metabolism               |
| 0.331968222 | Metabolism               |
| 0.559093582 | Metabolism               |
| 0.653697735 | Metabolism               |
| 0.092032625 | TME                      |
| 0.187961145 | TME                      |
| 0.013731462 | TME                      |
| 0.013202779 | TME                      |
| 0.216802828 | TME                      |



|             |                          |
|-------------|--------------------------|
| 0.067276153 | TME                      |
| 0.056386482 | TME                      |
| 0.001643194 | TME                      |
| 0.000649652 | TME                      |
| 0.000595425 | Proliferation/Metastasis |
| 0.000731027 | Proliferation/Metastasis |
| 0.941844711 | Metabolism               |
| 0.021849178 | Metabolism               |
| 0.000254534 | TME                      |
| 0.005855644 | Metabolism               |
| 0.933640428 | Metabolism               |
| 0.080824644 | TME                      |
| 0.069810106 | Proliferation/Metastasis |
| 0.105047431 | Proliferation/Metastasis |
| 0.059056628 | TME                      |
| 0.2286746   | Metabolism               |
| 0.605971097 | Metabolism               |
| 0.137166632 | Proliferation/Metastasis |
| 0.037754472 | Proliferation/Metastasis |
| 0.136133324 | TME                      |
| 0.07991768  | TME                      |
| 0.048331118 | TME                      |
| 0.799629997 | TME                      |
| 0.31804797  | Proliferation/Metastasis |
| 0.028916717 | TME                      |
| 0.482390226 | TME                      |
| 0.856117506 | Metabolism               |
| 0.008240119 | TME                      |
| 0.025975616 | TME                      |
| 0.000947815 | TME                      |
| 0.119601087 | TME                      |
| 0.069720687 | Metabolism               |
| 0.641964428 | Metabolism               |
| 0.044198602 | Metabolism               |
| 0.27433113  | TME                      |
| 0.534590181 | Metabolism               |
| 0.008124309 | TME                      |
| 0.001220839 | TME                      |
| 0.038607596 | TME                      |
| 0.00132454  | TME                      |
| 0.000294063 | TME                      |
| 0.63192294  | Metabolism               |
| 0.009593476 | Proliferation/Metastasis |

|             |                          |
|-------------|--------------------------|
| 0.923083561 | Metabolism               |
| 0.017547142 | Proliferation/Metastasis |
| 0.158419321 | Metabolism               |
| 0.40615022  | Metabolism               |
| 0.695326743 | Metabolism               |
| 0.043999554 | Metabolism               |
| 0.582113714 | Metabolism               |
| 0.739727913 | Metabolism               |
| 0.708456609 | Metabolism               |
| 0.755122238 | Metabolism               |
| 0.30851619  | Metabolism               |
| 0.598390029 | Metabolism               |
| 0.230999729 | Metabolism               |
| 0.409538745 | Metabolism               |
| 0.53436377  | Metabolism               |
| 0.941518589 | Metabolism               |
| 0.532669741 | TME                      |
| 0.166112074 | Proliferation/Metastasis |
| 4.52E-06    | Metabolism               |
| 0.480884573 | Proliferation/Metastasis |
| 0.001803899 | TME                      |
| 0.107780967 | Proliferation/Metastasis |
| 0.963198547 | Proliferation/Metastasis |
| 0.690416917 | TME                      |
| 0.014646913 | TME                      |
| 0.009959441 | Metabolism               |
| 0.589085283 | Metabolism               |
| 0.01544057  | Proliferation/Metastasis |
| 0.001192763 | Proliferation/Metastasis |
| 0.008284477 | Proliferation/Metastasis |
| 0.864714208 | Metabolism               |
| 0.747035608 | Metabolism               |
| 0.000193325 | Metabolism               |
| 0.622909661 | Proliferation/Metastasis |
| 0.117748446 | TME                      |
| 0.615815365 | TME                      |
| 0.911439215 | Metabolism               |
| 0.107511061 | Proliferation/Metastasis |
| 0.303327646 | Metabolism               |
| 0.000307948 | TME                      |
| 0.000969635 | TME                      |
| 0.797241524 | TME                      |
| 0.68148716  | TME                      |

|             |                          |
|-------------|--------------------------|
| 0.979249198 | Metabolism               |
| 0.039300539 | TME                      |
| 0.000225255 | Proliferation/Metastasis |
| 0.258795555 | TME                      |
| 0.108688715 | Proliferation/Metastasis |
| 0.266773853 | Proliferation/Metastasis |
| 0.380153282 | Metabolism               |
| 0.092872067 | Proliferation/Metastasis |
| 0.055216011 | TME                      |
| 0.488584608 | Metabolism               |
| 0.036165913 | TME                      |
| 0.004008306 | TME                      |
| 3.34E-07    | TME                      |
| 0.007604886 | TME                      |
| 2.88E-05    | TME                      |
| 0.015747378 | TME                      |
| 0.043408152 | Metabolism               |
| 0.678800116 | TME                      |
| 0.012154013 | Metabolism               |
| 0.591280407 | Metabolism               |
| 0.677868034 | Proliferation/Metastasis |
| 0.000753587 | Proliferation/Metastasis |
| 0.591512261 | Metabolism               |
| 0.938164562 | Metabolism               |
| 0.00310278  | Metabolism               |
| 0.997256909 | Metabolism               |
| 0.002680982 | Proliferation/Metastasis |
| 0.087595649 | Proliferation/Metastasis |
| 0.241576998 | Metabolism               |
| 0.936300788 | Metabolism               |
| 0.586922209 | Metabolism               |
| 0.45636676  | TME                      |
| 0.048150762 | Metabolism               |
| 0.94375531  | Metabolism               |
| 0.550590495 | Metabolism               |
| 0.032461644 | Metabolism               |
| 0.046220019 | Proliferation/Metastasis |
| 0.796457833 | Metabolism               |
| 0.059254877 | Metabolism               |
| 0.326556436 | Metabolism               |
| 0.241231753 | Metabolism               |
| 0.031957128 | Metabolism               |
| 0.62014684  | Metabolism               |

|             |                          |
|-------------|--------------------------|
| 6.75E-08    | Proliferation/Metastasis |
| 0.740639727 | Metabolism               |
| 0.013709097 | Metabolism               |
| 0.44101033  | Proliferation/Metastasis |
| 0.094306539 | Metabolism               |
| 0.17443451  | Metabolism               |
| 0.078062969 | Metabolism               |
| 0.15029329  | Metabolism               |
| 0.364929396 | Metabolism               |
| 0.157747251 | Metabolism               |
| 0.471058514 | Metabolism               |
| 0.176551205 | Metabolism               |
| 0.008159507 | TME                      |
| 0.001173315 | TME                      |
| 0.928109205 | TME                      |
| 0.220597109 | TME                      |
| 0.225560084 | TME                      |
| 0.39789733  | Metabolism               |
| 0.785698789 | Metabolism               |
| 0.002926327 | Proliferation/Metastasis |
| 0.807423054 | Metabolism               |
| 0.392006198 | Proliferation/Metastasis |
| 0.544118414 | Metabolism               |
| 0.098398964 | TME                      |
| 0.194458799 | Metabolism               |
| 0.781596433 | Metabolism               |
| 0.465324421 | Metabolism               |
| 0.932065417 | Metabolism               |
| 0.885718542 | TME                      |
| 0.910583533 | TME                      |
| 0.848525119 | Proliferation/Metastasis |
| 0.596663814 | Metabolism               |
| 0.118888955 | Proliferation/Metastasis |
| 0.000457565 | Proliferation/Metastasis |
| 0.594577667 | TME                      |
| 0.0924296   | TME                      |
| 0.19704845  | TME                      |
| 0.01436234  | TME                      |
| 0.440476351 | Metabolism               |
| 0.564805946 | Proliferation/Metastasis |
| 0.00550869  | Metabolism               |
| 0.009104537 | Metabolism               |
| 1.61E-05    | Proliferation/Metastasis |

|             |                          |
|-------------|--------------------------|
| 0.032980487 | Proliferation/Metastasis |
| 0.009326389 | Metabolism               |
| 0.135124173 | Metabolism               |
| 0.215188653 | Metabolism               |
| 0.850278581 | Metabolism               |
| 0.585096219 | TME                      |
| 0.000178701 | TME                      |
| 0.002363372 | TME                      |
| 0.0522722   | TME                      |
| 0.002451205 | TME                      |
| 0.353635173 | Metabolism               |
| 0.015076182 | Metabolism               |
| 0.442123143 | Metabolism               |
| 0.534293246 | Metabolism               |
| 0.21395489  | Metabolism               |
| 0.001155328 | TME                      |
| 0.028267377 | TME                      |
| 0.001266105 | TME                      |
| 0.536440191 | TME                      |
| 0.468619883 | TME                      |
| 0.044528537 | TME                      |
| 0.142095803 | TME                      |
| 0.013536101 | TME                      |
| 0.106144427 | TME                      |
| 0.044389379 | Proliferation/Metastasis |
| 0.028413537 | Proliferation/Metastasis |
| 0.8222254   | Metabolism               |
| 0.505260012 | Metabolism               |
| 0.135642907 | TME                      |
| 0.224573704 | Metabolism               |
| 0.406896032 | Metabolism               |
| 0.000135218 | TME                      |
| 0.496938719 | Proliferation/Metastasis |
| 0.021431304 | Proliferation/Metastasis |
| 0.459634149 | TME                      |
| 0.152865263 | Metabolism               |
| 0.125055175 | Metabolism               |
| 0.017057122 | Proliferation/Metastasis |
| 0.272223209 | Proliferation/Metastasis |
| 0.962263371 | TME                      |
| 0.007755979 | TME                      |
| 0.054451363 | TME                      |
| 0.718339701 | TME                      |

|             |                          |
|-------------|--------------------------|
| 0.8871262   | Proliferation/Metastasis |
| 0.277265024 | TME                      |
| 2.73E-06    | TME                      |
| 0.005775499 | Metabolism               |
| 0.001419681 | TME                      |
| 0.00939705  | TME                      |
| 0.03353137  | TME                      |
| 0.073614591 | TME                      |
| 0.371384023 | Metabolism               |
| 0.395751745 | Metabolism               |
| 0.931982979 | Metabolism               |
| 0.008649529 | TME                      |
| 0.495788285 | Metabolism               |
| 0.69713288  | TME                      |
| 0.986193296 | TME                      |
| 0.007440259 | TME                      |
| 0.198420473 | TME                      |
| 0.074173915 | TME                      |
| 0.232718509 | Metabolism               |
| 0.02777728  | Proliferation/Metastasis |
| 0.01698507  | Metabolism               |
| 0.906824287 | Proliferation/Metastasis |
| 0.026106285 | Metabolism               |
| 0.001443789 | Metabolism               |
| 0.015261008 | Metabolism               |
| 0.6276647   | Metabolism               |
| 0.095176492 | Metabolism               |
| 4.95E-05    | Metabolism               |
| 0.000103662 | Metabolism               |
| 0.46048067  | Metabolism               |
| 9.14E-07    | Metabolism               |
| 7.27E-06    | Metabolism               |
| 4.98E-08    | Metabolism               |
| 0.026246099 | Metabolism               |
| 0.072478909 | Metabolism               |
| 0.547932862 | Metabolism               |
| 9.44E-07    | TME                      |
| 0.493950878 | Proliferation/Metastasis |
| 0.001666222 | Metabolism               |
| 0.000306841 | Proliferation/Metastasis |
| 0.023235064 | TME                      |
| 2.27E-05    | Proliferation/Metastasis |
| 0.000366318 | Proliferation/Metastasis |

|             |                          |
|-------------|--------------------------|
| 0.00053754  | TME                      |
| 2.68E-05    | TME                      |
| 0.889971904 | Metabolism               |
| 0.504811083 | Metabolism               |
| 0.634991644 | Proliferation/Metastasis |
| 0.083986627 | Proliferation/Metastasis |
| 0.000340232 | Proliferation/Metastasis |
| 0.198723417 | Metabolism               |
| 0.115534444 | Metabolism               |
| 0.173555074 | Metabolism               |
| 5.68E-08    | Proliferation/Metastasis |
| 0.000964825 | TME                      |
| 0.038391376 | TME                      |
| 0.9125729   | Metabolism               |
| 0.358364616 | Proliferation/Metastasis |
| 0.968510135 | Metabolism               |
| 0.38078284  | TME                      |
| 0.277521148 | TME                      |
| 0.001357988 | TME                      |
| 0.001178886 | TME                      |
| 0.069090828 | Metabolism               |
| 0.042220457 | TME                      |
| 0.055826976 | Proliferation/Metastasis |
| 1.01E-08    | TME                      |
| 0.530229508 | Proliferation/Metastasis |
| 0.425903287 | Proliferation/Metastasis |
| 0.042786467 | Metabolism               |
| 0.029525308 | Proliferation/Metastasis |
| 0.000943218 | TME                      |
| 0.691865072 | Metabolism               |
| 0.237585713 | TME                      |
| 0.226015415 | TME                      |
| 0.862556476 | TME                      |
| 0.003490277 | TME                      |
| 0.714334658 | TME                      |
| 0.094844969 | TME                      |
| 5.97E-05    | Metabolism               |
| 1.13E-08    | TME                      |
| 0.000923128 | Metabolism               |
| 0.302238872 | Metabolism               |
| 0.040782116 | Proliferation/Metastasis |
| 0.000260435 | Proliferation/Metastasis |
| 0.012357737 | Metabolism               |

|             |                          |
|-------------|--------------------------|
| 9.38E-07    | Metabolism               |
| 0.835043944 | Metabolism               |
| 0.51540654  | Metabolism               |
| 0.001294778 | Proliferation/Metastasis |
| 0.653071217 | Proliferation/Metastasis |
| 0.004094073 | Metabolism               |
| 0.81168207  | Metabolism               |
| 0.432238805 | Metabolism               |
| 0.087286233 | TME                      |
| 0.483922777 | Metabolism               |
| 0.33713374  | Metabolism               |
| 0.385492725 | Metabolism               |
| 0.560683444 | Metabolism               |
| 0.524898122 | Proliferation/Metastasis |
| 0.907451028 | Metabolism               |
| 3.87E-05    | Metabolism               |
| 0.305244292 | Metabolism               |
| 0.138982616 | Metabolism               |
| 0.110548765 | Metabolism               |
| 0.463913084 | Metabolism               |
| 0.000143111 | Proliferation/Metastasis |
| 0.044365417 | Metabolism               |
| 0.002203471 | Metabolism               |
| 0.015442752 | Proliferation/Metastasis |
| 0.460455479 | Metabolism               |
| 0.155707483 | Metabolism               |
| 0.001526974 | Metabolism               |
| 0.03283307  | Metabolism               |
| 0.15411957  | Metabolism               |
| 0.135647955 | Metabolism               |
| 0.463248649 | Metabolism               |
| 0.601055573 | Metabolism               |
| 0.01333099  | TME                      |
| 0.002014142 | TME                      |
| 0.029720648 | TME                      |
| 0.055510493 | TME                      |
| 0.066481037 | TME                      |
| 0.116029766 | Metabolism               |
| 0.699577243 | Metabolism               |
| 0.220370751 | Proliferation/Metastasis |
| 0.777031822 | Metabolism               |
| 3.43E-06    | Proliferation/Metastasis |
| 0.009423401 | Metabolism               |



|             |                          |
|-------------|--------------------------|
| 0.005245674 | TME                      |
| 0.352908583 | Metabolism               |
| 0.819217487 | Metabolism               |
| 0.007641356 | Metabolism               |
| 0.661571721 | Metabolism               |
| 0.515092993 | TME                      |
| 0.026580382 | TME                      |
| 0.137514964 | Proliferation/Metastasis |
| 0.828982038 | Metabolism               |
| 0.89625632  | Proliferation/Metastasis |
| 0.70356628  | Proliferation/Metastasis |
| 0.84990879  | TME                      |
| 0.460642119 | TME                      |
| 0.009508975 | TME                      |
| 0.762521593 | TME                      |
| 0.132530967 | Metabolism               |
| 0.043473022 | Proliferation/Metastasis |
| 9.25E-09    | Metabolism               |
| 0.092363032 | Metabolism               |
| 0.026635776 | Proliferation/Metastasis |
| 0.895994005 | Proliferation/Metastasis |
| 1.99E-05    | Metabolism               |
| 0.005223972 | Metabolism               |
| 0.581487858 | Metabolism               |
| 0.002991586 | Metabolism               |
| 0.769491995 | TME                      |
| 0.895097933 | TME                      |
| 0.044682331 | TME                      |
| 0.760420964 | TME                      |
| 0.006215358 | TME                      |
| 0.000315218 | Metabolism               |
| 0.07924882  | Metabolism               |
| 0.00106751  | Metabolism               |
| 0.000399669 | Metabolism               |
| 0.000350187 | Metabolism               |
| 0.091690868 | TME                      |
| 0.797951739 | TME                      |
| 0.867436744 | TME                      |
| 0.37178514  | TME                      |
| 0.029040256 | TME                      |
| 0.867497705 | TME                      |
| 0.657548582 | TME                      |
| 0.796851625 | TME                      |

|             |                          |
|-------------|--------------------------|
| 0.218060632 | TME                      |
| 3.92E-07    | Proliferation/Metastasis |
| 1.90E-08    | Proliferation/Metastasis |
| 0.370131719 | Metabolism               |
| 0.277322224 | Metabolism               |
| 0.389465809 | TME                      |
| 0.04781348  | Metabolism               |
| 2.41E-06    | Metabolism               |
| 0.552351996 | TME                      |
| 0.001558238 | Proliferation/Metastasis |
| 0.154131765 | Proliferation/Metastasis |
| 0.010573791 | TME                      |
| 1.31E-05    | Metabolism               |
| 4.25E-06    | Metabolism               |
| 4.42E-05    | Proliferation/Metastasis |
| 0.209502008 | Proliferation/Metastasis |
| 0.311085186 | TME                      |
| 0.090332835 | TME                      |
| 0.113237573 | TME                      |
| 0.001588598 | TME                      |
| 1.51E-09    | Proliferation/Metastasis |
| 0.055005297 | TME                      |
| 0.327161595 | TME                      |
| 0.005466581 | Metabolism               |
| 0.404044488 | TME                      |
| 0.124654207 | TME                      |
| 0.714818943 | TME                      |
| 0.011689986 | TME                      |
| 0.005236359 | Metabolism               |
| 0.005984266 | Metabolism               |
| 0.004939409 | Metabolism               |
| 0.137542928 | TME                      |
| 0.000378413 | Metabolism               |
| 0.674352905 | TME                      |
| 0.733996555 | TME                      |
| 0.502562427 | TME                      |
| 0.175098359 | TME                      |
| 0.027219277 | TME                      |
| 0.000215616 | Metabolism               |
| 1.11E-08    | Proliferation/Metastasis |
| 0.02820646  | Metabolism               |
| 0.011491642 | Proliferation/Metastasis |
| 0.000256488 | Metabolism               |

|             |                          |
|-------------|--------------------------|
| 0.047879168 | Metabolism               |
| 2.55E-05    | Metabolism               |
| 0.1075046   | Metabolism               |
| 0.232792101 | Metabolism               |
| 0.108468579 | Metabolism               |
| 0.002333465 | Metabolism               |
| 0.450198157 | Metabolism               |
| 0.013438613 | Metabolism               |
| 0.064631803 | Metabolism               |
| 0.000517618 | Metabolism               |
| 0.000258583 | Metabolism               |
| 0.017254479 | Metabolism               |
| 0.022215791 | Metabolism               |
| 0.146865221 | TME                      |
| 0.24278257  | Proliferation/Metastasis |
| 0.005183225 | Metabolism               |
| 0.482692585 | Proliferation/Metastasis |
| 0.585793122 | TME                      |
| 0.822141244 | Proliferation/Metastasis |
| 0.010519954 | Proliferation/Metastasis |
| 0.611720356 | TME                      |
| 0.665727589 | TME                      |
| 3.62E-05    | Metabolism               |
| 9.03E-08    | Metabolism               |
| 0.084435435 | Proliferation/Metastasis |
| 3.03E-05    | Proliferation/Metastasis |
| 0.153990496 | Proliferation/Metastasis |
| 1.29E-05    | Metabolism               |
| 0.008092882 | Metabolism               |
| 0.001958962 | Metabolism               |
| 0.022988285 | Proliferation/Metastasis |
| 0.050139122 | TME                      |
| 0.306092579 | TME                      |
| 0.15342361  | Metabolism               |
| 0.000115674 | Proliferation/Metastasis |
| 2.70E-09    | Metabolism               |
| 0.558403394 | TME                      |
| 0.449869213 | TME                      |
| 0.23820909  | TME                      |
| 0.251979934 | TME                      |
| 2.62E-06    | Metabolism               |
| 0.802069102 | TME                      |
| 1.52E-09    | Proliferation/Metastasis |

|             |                          |
|-------------|--------------------------|
| 0.610458443 | TME                      |
| 9.41E-05    | Proliferation/Metastasis |
| 0.114768645 | Proliferation/Metastasis |
| 0.076930835 | Metabolism               |
| 0.640258204 | Proliferation/Metastasis |
| 0.121145284 | TME                      |
| 0.619542761 | Metabolism               |
| 0.693830336 | TME                      |
| 0.286112853 | TME                      |
| 0.352480634 | TME                      |
| 0.660412567 | TME                      |
| 0.14736339  | TME                      |
| 0.106172032 | TME                      |
| 0.611309929 | Metabolism               |
| 0.532317742 | TME                      |
| 0.763604879 | Metabolism               |
| 0.195527641 | Metabolism               |
| 0.001087227 | Proliferation/Metastasis |
| 0.085677577 | Proliferation/Metastasis |
| 0.001146418 | Metabolism               |
| 0.01162657  | Metabolism               |
| 0.259712959 | Metabolism               |
| 1.85E-05    | Metabolism               |
| 0.038866224 | Proliferation/Metastasis |
| 0.003340464 | Proliferation/Metastasis |
| 0.271706295 | Metabolism               |
| 3.51E-05    | Metabolism               |
| 0.024294944 | Metabolism               |
| 0.982309484 | TME                      |
| 0.082275768 | Metabolism               |
| 0.823947278 | Metabolism               |
| 0.157086215 | Metabolism               |
| 0.107893864 | Metabolism               |
| 0.000808384 | Proliferation/Metastasis |
| 0.000890643 | Metabolism               |
| 0.001623739 | Metabolism               |
| 0.571267196 | Metabolism               |
| 0.378686525 | Metabolism               |
| 0.515116673 | Metabolism               |
| 0.043342299 | Metabolism               |
| 0.457976439 | Proliferation/Metastasis |
| 2.74E-05    | Metabolism               |
| 0.000264109 | Metabolism               |

|             |                          |
|-------------|--------------------------|
| 0.420040666 | Proliferation/Metastasis |
| 2.93E-07    | Metabolism               |
| 1.71E-05    | Metabolism               |
| 0.453928106 | Metabolism               |
| 0.044101199 | Metabolism               |
| 0.226700857 | Metabolism               |
| 0.000198117 | Metabolism               |
| 0.000958955 | Metabolism               |
| 0.06961755  | Metabolism               |
| 0.243251483 | TME                      |
| 0.894756009 | TME                      |
| 0.01980765  | TME                      |
| 0.301733599 | TME                      |
| 0.980616855 | TME                      |
| 0.000301193 | Metabolism               |
| 0.036079431 | Metabolism               |
| 8.37E-06    | Proliferation/Metastasis |
| 0.00103092  | Metabolism               |
| 0.076468114 | Proliferation/Metastasis |
| 0.003603241 | Metabolism               |
| 0.371183888 | TME                      |
| 0.000576885 | Metabolism               |
| 0.000166269 | Metabolism               |
| 0.012005994 | Metabolism               |
| 0.118530893 | Metabolism               |
| 0.327551685 | TME                      |
| 0.289621676 | TME                      |
| 0.682731742 | Proliferation/Metastasis |
| 0.013435385 | Metabolism               |
| 0.335263579 | Proliferation/Metastasis |
| 0.007487528 | Proliferation/Metastasis |
| 0.153265337 | TME                      |
| 0.013302709 | TME                      |
| 0.574256431 | TME                      |
| 0.366047632 | TME                      |
| 3.30E-06    | Metabolism               |
| 0.006002764 | Proliferation/Metastasis |
| 0.855678648 | Metabolism               |
| 0.044238641 | Metabolism               |
| 0.218720024 | Proliferation/Metastasis |
| 0.768897739 | Proliferation/Metastasis |
| 0.924420783 | Metabolism               |
| 0.167401091 | Metabolism               |

|             |                          |
|-------------|--------------------------|
| 0.000174289 | Metabolism               |
| 0.463582823 | Metabolism               |
| 0.113525962 | TME                      |
| 0.749253957 | TME                      |
| 0.622871178 | TME                      |
| 0.030469753 | TME                      |
| 0.398828401 | TME                      |
| 0.553801965 | Metabolism               |
| 0.136536693 | Metabolism               |
| 0.231523245 | Metabolism               |
| 0.692629052 | Metabolism               |
| 0.002409387 | Metabolism               |
| 0.138170819 | TME                      |
| 0.945203002 | TME                      |
| 0.52252213  | TME                      |
| 0.355543256 | TME                      |
| 0.327740261 | TME                      |
| 0.282829066 | TME                      |
| 0.504750306 | TME                      |
| 0.629326151 | TME                      |
| 0.395752539 | TME                      |
| 0.004226608 | Proliferation/Metastasis |
| 0.017857973 | Proliferation/Metastasis |
| 0.000109535 | Metabolism               |
| 6.17E-06    | Metabolism               |
| 0.141952703 | TME                      |
| 0.942195372 | Metabolism               |
| 0.142806035 | Metabolism               |
| 0.126887976 | TME                      |
| 0.168657005 | Proliferation/Metastasis |
| 0.003039108 | Proliferation/Metastasis |
| 0.102934005 | TME                      |
| 0.753682875 | Metabolism               |
| 0.531159308 | Metabolism               |
| 0.001320221 | Proliferation/Metastasis |
| 0.29161178  | Proliferation/Metastasis |
| 0.782683924 | TME                      |
| 0.353758366 | TME                      |
| 0.908432998 | TME                      |
| 0.181938626 | TME                      |
| 0.000274877 | Proliferation/Metastasis |
| 0.150891013 | TME                      |
| 0.656143131 | TME                      |

|             |                          |
|-------------|--------------------------|
| 0.874789143 | Metabolism               |
| 0.276609193 | TME                      |
| 0.983782126 | TME                      |
| 0.413216095 | TME                      |
| 0.492038975 | TME                      |
| 0.031607607 | Metabolism               |
| 0.149493577 | Metabolism               |
| 0.191322059 | Metabolism               |
| 0.84830232  | TME                      |
| 0.661625211 | Metabolism               |
| 0.003433958 | TME                      |
| 0.030306354 | TME                      |
| 0.240155222 | TME                      |
| 0.369596718 | TME                      |
| 0.011856853 | TME                      |
| 0.197766244 | Metabolism               |
| 0.001728276 | Proliferation/Metastasis |
| 0.110437538 | Metabolism               |
| 0.589014362 | Proliferation/Metastasis |
| 0.43597082  | Metabolism               |
| 0.061912634 | Metabolism               |
| 0.90260216  | Metabolism               |
| 0.038236787 | Metabolism               |
| 0.010828379 | Metabolism               |
| 0.655240341 | Metabolism               |
| 0.009831864 | Metabolism               |
| 0.899947039 | Metabolism               |
| 0.417849402 | Metabolism               |
| 0.110795426 | Metabolism               |
| 0.394108506 | Metabolism               |
| 0.121740026 | Metabolism               |
| 0.238066842 | Metabolism               |
| 0.139483241 | Metabolism               |
| 0.176538688 | TME                      |
| 0.347560861 | Proliferation/Metastasis |
| 0.58226882  | Metabolism               |
| 0.941178739 | Proliferation/Metastasis |
| 0.251219709 | TME                      |
| 0.554989766 | Proliferation/Metastasis |
| 0.296991996 | Proliferation/Metastasis |
| 0.103550645 | TME                      |
| 0.603372212 | TME                      |
| 0.921928074 | Metabolism               |

|             |                          |
|-------------|--------------------------|
| 0.133719853 | Metabolism               |
| 0.019009979 | Proliferation/Metastasis |
| 2.34E-05    | Proliferation/Metastasis |
| 0.127659088 | Proliferation/Metastasis |
| 0.964300313 | Metabolism               |
| 0.083345959 | Metabolism               |
| 0.086523504 | Metabolism               |
| 0.417839952 | Proliferation/Metastasis |
| 0.17119826  | TME                      |
| 0.037303052 | TME                      |
| 0.896664116 | Metabolism               |
| 0.561661482 | Proliferation/Metastasis |
| 0.335560175 | Metabolism               |
| 0.537542233 | TME                      |
| 0.050475411 | TME                      |
| 0.590138354 | TME                      |
| 0.777680165 | TME                      |
| 0.951322832 | Metabolism               |
| 0.222119302 | TME                      |
| 0.356007788 | Proliferation/Metastasis |
| 0.49497797  | TME                      |
| 0.923593396 | Proliferation/Metastasis |
| 1.10E-05    | Proliferation/Metastasis |
| 0.121820521 | Metabolism               |
| 4.84E-06    | Proliferation/Metastasis |
| 0.92416896  | TME                      |
| 0.823882088 | Metabolism               |
| 0.110121861 | TME                      |
| 0.322681516 | TME                      |
| 0.329184813 | TME                      |
| 0.888699631 | TME                      |
| 0.273428847 | TME                      |
| 0.182372719 | TME                      |
| 0.093575385 | Metabolism               |
| 0.194812097 | TME                      |
| 0.604722389 | Metabolism               |
| 0.033359279 | Metabolism               |
| 0.352726854 | Proliferation/Metastasis |
| 0.423704085 | Proliferation/Metastasis |
| 1.64E-05    | Metabolism               |
| 0.198973677 | Metabolism               |
| 0.409471629 | Metabolism               |
| 0.58666802  | Metabolism               |



|             |                          |
|-------------|--------------------------|
| 0.731798862 | Proliferation/Metastasis |
| 0.027972922 | Proliferation/Metastasis |
| 0.393949782 | Metabolism               |
| 0.487278889 | Metabolism               |
| 0.852680346 | Metabolism               |
| 0.515108215 | TME                      |
| 0.062128395 | Metabolism               |
| 0.159316241 | Metabolism               |
| 0.282014941 | Metabolism               |
| 0.401223969 | Metabolism               |
| 0.194264759 | Proliferation/Metastasis |
| 0.169559905 | Metabolism               |
| 0.661714312 | Metabolism               |
| 0.388400984 | Metabolism               |
| 0.000876918 | Metabolism               |
| 0.000149302 | Metabolism               |
| 0.012137346 | Metabolism               |
| 0.393154821 | Proliferation/Metastasis |
| 0.860363798 | Metabolism               |
| 0.981381533 | Metabolism               |
| 0.004317618 | Proliferation/Metastasis |
| 0.00173998  | Metabolism               |
| 0.963553494 | Metabolism               |
| 0.155798083 | Metabolism               |
| 0.949644404 | Metabolism               |
| 0.118604069 | Metabolism               |
| 0.664827137 | Metabolism               |
| 0.347199498 | Metabolism               |
| 0.044904297 | Metabolism               |
| 0.4280486   | TME                      |
| 0.528083783 | TME                      |
| 0.846251661 | TME                      |
| 0.582763971 | TME                      |
| 0.900558125 | TME                      |
| 0.063506884 | Metabolism               |
| 0.119779724 | Metabolism               |
| 0.471801481 | Proliferation/Metastasis |
| 0.925822941 | Metabolism               |
| 0.319755244 | Proliferation/Metastasis |
| 0.876631813 | Metabolism               |
| 0.668754824 | TME                      |
| 0.272551173 | Metabolism               |
| 0.856553787 | Metabolism               |

|             |                          |
|-------------|--------------------------|
| 0.136892768 | Metabolism               |
| 0.203136937 | Metabolism               |
| 0.112778187 | TME                      |
| 0.803063761 | TME                      |
| 0.258666138 | Proliferation/Metastasis |
| 0.958276414 | Metabolism               |
| 0.000572062 | Proliferation/Metastasis |
| 0.230623881 | Proliferation/Metastasis |
| 0.683891088 | TME                      |
| 0.142928951 | TME                      |
| 0.048892583 | TME                      |
| 0.269450699 | TME                      |
| 0.15331782  | Metabolism               |
| 0.098600959 | Proliferation/Metastasis |
| 0.014148079 | Metabolism               |
| 0.09278796  | Metabolism               |
| 0.413149628 | Proliferation/Metastasis |
| 0.920986702 | Proliferation/Metastasis |
| 0.002806391 | Metabolism               |
| 0.050006924 | Metabolism               |
| 0.957809315 | Metabolism               |
| 0.112365919 | Metabolism               |
| 0.097508438 | TME                      |
| 0.35569665  | TME                      |
| 0.860486823 | TME                      |
| 0.191391256 | TME                      |
| 0.129842055 | TME                      |
| 0.206238337 | Metabolism               |
| 0.47227613  | Metabolism               |
| 0.00468321  | Metabolism               |
| 0.003455149 | Metabolism               |
| 0.344707493 | Metabolism               |
| 0.185654545 | TME                      |
| 0.486196384 | TME                      |
| 0.308917297 | TME                      |
| 0.04902251  | TME                      |
| 0.050016948 | TME                      |
| 0.342118428 | TME                      |
| 0.301705295 | TME                      |
| 0.243881818 | TME                      |
| 0.024855674 | TME                      |
| 0.027702884 | Proliferation/Metastasis |
| 0.000920472 | Proliferation/Metastasis |

|             |                          |
|-------------|--------------------------|
| 0.878143921 | Metabolism               |
| 0.506078839 | Metabolism               |
| 0.682415037 | TME                      |
| 0.283330561 | Metabolism               |
| 0.000226496 | Metabolism               |
| 0.064192526 | TME                      |
| 0.00227921  | Proliferation/Metastasis |
| 0.814908655 | Proliferation/Metastasis |
| 0.154233678 | TME                      |
| 0.001696836 | Metabolism               |
| 0.000273204 | Metabolism               |
| 0.205344514 | Proliferation/Metastasis |
| 0.413778763 | Proliferation/Metastasis |
| 0.037888507 | TME                      |
| 0.087610838 | TME                      |
| 0.011169819 | TME                      |
| 0.154910953 | TME                      |
| 0.004616679 | Proliferation/Metastasis |
| 0.232813542 | TME                      |
| 0.0776459   | TME                      |
| 0.278474623 | Metabolism               |
| 0.045364585 | TME                      |
| 0.052295727 | TME                      |
| 0.449863477 | TME                      |
| 0.07897343  | TME                      |
| 0.073677276 | Metabolism               |
| 0.103323021 | Metabolism               |
| 0.017854254 | Metabolism               |
| 0.444987826 | TME                      |
| 0.037537665 | Metabolism               |
| 0.519718163 | TME                      |
| 0.751272313 | TME                      |
| 0.073013611 | TME                      |
| 0.28628051  | TME                      |
| 0.011174672 | TME                      |
| 0.003954632 | Metabolism               |
| 0.019109226 | Proliferation/Metastasis |
| 0.024181529 | Metabolism               |
| 0.013955939 | Proliferation/Metastasis |
| 0.012477029 | Metabolism               |
| 0.76421901  | Metabolism               |
| 0.05349197  | Metabolism               |
| 0.045394512 | Metabolism               |

|             |                          |
|-------------|--------------------------|
| 0.020048376 | Metabolism               |
| 0.863537195 | Metabolism               |
| 0.652554227 | Metabolism               |
| 0.952458597 | Metabolism               |
| 0.968357623 | Metabolism               |
| 0.214871598 | Metabolism               |
| 0.568307038 | Metabolism               |
| 0.000444113 | Metabolism               |
| 3.05E-05    | Metabolism               |
| 0.013017109 | Metabolism               |
| 0.089166655 | TME                      |
| 0.004013182 | Proliferation/Metastasis |
| 0.36453748  | Metabolism               |
| 0.975553963 | Proliferation/Metastasis |
| 0.112265    | TME                      |
| 0.178212018 | Proliferation/Metastasis |
| 0.002361343 | Proliferation/Metastasis |
| 0.483585235 | TME                      |
| 0.956477744 | TME                      |
| 0.000272468 | Metabolism               |
| 4.75E-06    | Metabolism               |
| 0.651799323 | Proliferation/Metastasis |
| 0.046812251 | Proliferation/Metastasis |
| 0.100386894 | Proliferation/Metastasis |
| 0.00066516  | Metabolism               |
| 0.004874501 | Metabolism               |
| 0.071687021 | Metabolism               |
| 0.504585795 | Proliferation/Metastasis |
| 0.012266677 | TME                      |
| 0.32683162  | TME                      |
| 0.036434843 | Metabolism               |
| 0.000272939 | Proliferation/Metastasis |
| 2.89E-05    | Metabolism               |
| 0.931111224 | TME                      |
| 0.042377223 | TME                      |
| 0.396505312 | TME                      |
| 0.282126375 | TME                      |
| 0.00136168  | Metabolism               |
| 0.121068863 | TME                      |
| 2.03E-05    | Proliferation/Metastasis |
| 0.134537775 | TME                      |
| 4.49E-05    | Proliferation/Metastasis |
| 0.904024509 | Proliferation/Metastasis |

|             |                          |
|-------------|--------------------------|
| 0.035775944 | Metabolism               |
| 0.176588837 | Proliferation/Metastasis |
| 0.02195637  | TME                      |
| 0.85285878  | Metabolism               |
| 0.574730468 | TME                      |
| 0.109532166 | TME                      |
| 0.284654755 | TME                      |
| 0.194738951 | TME                      |
| 0.646999781 | TME                      |
| 0.019245889 | TME                      |
| 0.72007067  | Metabolism               |
| 0.271888901 | TME                      |
| 0.822079235 | Metabolism               |
| 0.866139304 | Metabolism               |
| 0.001310038 | Proliferation/Metastasis |
| 0.887670802 | Proliferation/Metastasis |
| 0.648267416 | Metabolism               |
| 0.970389752 | Metabolism               |
| 0.030585075 | Metabolism               |
| 8.49E-05    | Metabolism               |
| 0.532572142 | Proliferation/Metastasis |
| 0.519045279 | Proliferation/Metastasis |
| 0.246336789 | Metabolism               |
| 0.006150507 | Metabolism               |
| 0.091705674 | Metabolism               |
| 0.798774442 | TME                      |
| 0.111317017 | Metabolism               |
| 0.986524033 | Metabolism               |
| 0.877486837 | Metabolism               |
| 0.008379438 | Metabolism               |
| 0.010847918 | Proliferation/Metastasis |
| 0.000849051 | Metabolism               |
| 0.236260433 | Metabolism               |
| 0.122439605 | Metabolism               |
| 0.017942102 | Metabolism               |
| 0.008069715 | Metabolism               |
| 0.026319942 | Metabolism               |
| 0.954821352 | Proliferation/Metastasis |
| 0.002273633 | Metabolism               |
| 0.092905691 | Metabolism               |
| 0.003897947 | Proliferation/Metastasis |
| 0.006442121 | Metabolism               |
| 9.95E-05    | Metabolism               |

|             |                          |
|-------------|--------------------------|
| 0.014172538 | Metabolism               |
| 0.009886352 | Metabolism               |
| 0.009324546 | Metabolism               |
| 0.001629614 | Metabolism               |
| 0.005395789 | Metabolism               |
| 0.001917176 | Metabolism               |
| 0.079814007 | TME                      |
| 0.126680988 | TME                      |
| 0.002157884 | TME                      |
| 0.018640843 | TME                      |
| 0.193436363 | TME                      |
| 0.240028795 | Metabolism               |
| 0.001522637 | Metabolism               |
| 7.94E-05    | Proliferation/Metastasis |
| 0.011962789 | Metabolism               |
| 0.022022136 | Proliferation/Metastasis |
| 0.416006734 | Metabolism               |
| 0.640911707 | TME                      |
| 0.000694074 | Metabolism               |
| 2.62E-05    | Metabolism               |
| 0.539718531 | Metabolism               |
| 0.052535168 | Metabolism               |
| 0.877509294 | TME                      |
| 0.289354995 | TME                      |
| 0.197044653 | Proliferation/Metastasis |
| 0.037984968 | Metabolism               |
| 0.067947906 | Proliferation/Metastasis |
| 0.005263087 | Proliferation/Metastasis |
| 0.5245514   | TME                      |
| 0.277799819 | TME                      |
| 0.030966817 | TME                      |
| 0.301276449 | TME                      |
| 0.484531766 | Metabolism               |
| 0.007001452 | Proliferation/Metastasis |
| 2.90E-05    | Metabolism               |
| 0.000137957 | Metabolism               |
| 1.53E-05    | Proliferation/Metastasis |
| 0.001451851 | Proliferation/Metastasis |
| 3.95E-07    | Metabolism               |
| 2.48E-09    | Metabolism               |
| 0.159419791 | Metabolism               |
| 0.032671924 | Metabolism               |
| 0.269352801 | TME                      |

|             |                          |
|-------------|--------------------------|
| 0.878329147 | TME                      |
| 0.000263556 | TME                      |
| 0.179863264 | TME                      |
| 8.24E-09    | TME                      |
| 0.000364762 | Metabolism               |
| 0.002698704 | Metabolism               |
| 0.822149273 | Metabolism               |
| 0.019778972 | Metabolism               |
| 0.000529584 | Metabolism               |
| 0.425359904 | TME                      |
| 0.176004098 | TME                      |
| 0.867222633 | TME                      |
| 0.051019002 | TME                      |
| 0.042022775 | TME                      |
| 0.163236833 | TME                      |
| 0.121744321 | TME                      |
| 0.429571906 | TME                      |
| 0.065928179 | TME                      |
| 0.00057299  | Proliferation/Metastasis |
| 1.54E-07    | Proliferation/Metastasis |
| 0.310957021 | Metabolism               |
| 0.588118358 | Metabolism               |
| 0.326727299 | TME                      |
| 0.000595671 | Metabolism               |
| 6.98E-05    | Metabolism               |
| 0.775546247 | TME                      |
| 0.002316723 | Proliferation/Metastasis |
| 0.187662931 | Proliferation/Metastasis |
| 0.260169337 | TME                      |
| 1.46E-06    | Metabolism               |
| 1.15E-07    | Metabolism               |
| 0.003182688 | Proliferation/Metastasis |
| 0.023967288 | Proliferation/Metastasis |
| 0.03761508  | TME                      |
| 0.340340129 | TME                      |
| 0.022140203 | TME                      |
| 0.004824404 | TME                      |
| 0.002003696 | Proliferation/Metastasis |
| 0.923460309 | TME                      |
| 0.713515154 | TME                      |
| 0.045498137 | Metabolism               |
| 0.312920851 | TME                      |
| 0.178851928 | TME                      |

|             |                          |
|-------------|--------------------------|
| 0.174065304 | TME                      |
| 0.003302923 | TME                      |
| 0.161167297 | Metabolism               |
| 0.011459827 | Metabolism               |
| 0.01508995  | Metabolism               |
| 0.054045118 | TME                      |
| 0.001176674 | Metabolism               |
| 0.021747148 | TME                      |
| 0.099883573 | TME                      |
| 0.120897321 | TME                      |
| 0.521566864 | TME                      |
| 0.091068284 | TME                      |
| 3.41E-06    | Metabolism               |
| 0.000135989 | Proliferation/Metastasis |
| 3.92E-06    | Metabolism               |
| 0.011707952 | Proliferation/Metastasis |
| 1.70E-07    | Metabolism               |
| 0.024334813 | Metabolism               |
| 9.30E-05    | Metabolism               |
| 0.000138485 | Metabolism               |
| 1.92E-05    | Metabolism               |
| 0.001428476 | Metabolism               |
| 0.010327246 | Metabolism               |
| 0.920063189 | Metabolism               |
| 0.000749022 | Metabolism               |
| 0.041335615 | Metabolism               |
| 9.26E-06    | Metabolism               |
| 1.37E-06    | Metabolism               |
| 0.230752059 | Metabolism               |
| 0.016045523 | Metabolism               |
| 0.396226216 | TME                      |
| 0.596395303 | Proliferation/Metastasis |
| 8.99E-05    | Metabolism               |
| 5.78E-06    | Proliferation/Metastasis |
| 0.099812371 | TME                      |
| 0.134190918 | Proliferation/Metastasis |
| 0.494252489 | Proliferation/Metastasis |
| 0.08891386  | TME                      |
| 0.006923684 | TME                      |
| 0.000369013 | Metabolism               |
| 0.000209745 | Metabolism               |
| 0.486117285 | Proliferation/Metastasis |
| 0.001156772 | Proliferation/Metastasis |



|             |                          |
|-------------|--------------------------|
| 0.091904742 | Proliferation/Metastasis |
| 0.001073247 | Metabolism               |
| 0.286951311 | Metabolism               |
| 0.000616031 | Metabolism               |
| 0.012071644 | Proliferation/Metastasis |
| 0.989237747 | TME                      |
| 0.970058434 | TME                      |
| 0.969684008 | Metabolism               |
| 0.024468455 | Proliferation/Metastasis |
| 5.12E-05    | Metabolism               |
| 0.506213082 | TME                      |
| 0.703758853 | TME                      |
| 4.00E-06    | TME                      |
| 0.181396479 | TME                      |
| 3.71E-08    | Metabolism               |
| 3.58E-05    | TME                      |
| 1.76E-09    | Proliferation/Metastasis |
| 0.086124089 | TME                      |
| 8.42E-05    | Proliferation/Metastasis |
| 0.147500786 | Proliferation/Metastasis |
| 0.611386062 | Metabolism               |
| 0.579550352 | Proliferation/Metastasis |
| 0.2736489   | TME                      |
| 0.5225248   | Metabolism               |
| 0.076158999 | TME                      |
| 0.01844766  | TME                      |
| 0.00101186  | TME                      |
| 0.488863257 | TME                      |
| 0.038685466 | TME                      |
| 0.081185403 | TME                      |
| 0.005832274 | Metabolism               |
| 0.003443623 | TME                      |
| 0.026417705 | Metabolism               |
| 0.186702352 | Metabolism               |
| 0.113149933 | Proliferation/Metastasis |
| 5.28E-05    | Proliferation/Metastasis |
| 0.126356267 | Metabolism               |
| 0.01119676  | Metabolism               |
| 0.592736034 | Metabolism               |
| 9.69E-08    | Metabolism               |
| 2.13E-06    | Proliferation/Metastasis |
| 0.668750193 | Proliferation/Metastasis |
| 0.004429436 | Metabolism               |

|             |                          |
|-------------|--------------------------|
| 0.003948788 | Metabolism               |
| 0.00493725  | Metabolism               |
| 0.026660626 | TME                      |
| 0.004607397 | Metabolism               |
| 0.740735055 | Metabolism               |
| 0.859665075 | Metabolism               |
| 0.005963014 | Metabolism               |
| 0.14647226  | Proliferation/Metastasis |
| 0.007665257 | Metabolism               |
| 1.70E-05    | Metabolism               |
| 0.636882856 | Metabolism               |
| 0.206020061 | Metabolism               |
| 0.319722874 | Metabolism               |
| 0.002817716 | Metabolism               |
| 0.058815835 | Proliferation/Metastasis |
| 6.88E-06    | Metabolism               |
| 0.000389604 | Metabolism               |
| 0.52396366  | Proliferation/Metastasis |
| 0.061895686 | Metabolism               |
| 0.000644586 | Metabolism               |
| 0.788634785 | Metabolism               |
| 0.000219097 | Metabolism               |
| 0.001065961 | Metabolism               |
| 9.05E-08    | Metabolism               |
| 3.43E-06    | Metabolism               |
| 0.024992057 | Metabolism               |
| 0.111618932 | TME                      |
| 0.662607023 | TME                      |
| 0.056415892 | TME                      |
| 0.086171535 | TME                      |
| 0.120011513 | TME                      |
| 0.007157046 | Metabolism               |
| 0.000179796 | Metabolism               |
| 0.000663128 | Proliferation/Metastasis |
| 0.000786719 | Metabolism               |
| 0.1474022   | Proliferation/Metastasis |
| 0.004652065 | Metabolism               |
| 0.000987996 | TME                      |
| 6.11E-05    | Metabolism               |
| 0.00089695  | Metabolism               |
| 1.24E-06    | Metabolism               |
| 0.198138466 | Metabolism               |
| 0.791624371 | TME                      |

|             |                          |
|-------------|--------------------------|
| 0.284222539 | TME                      |
| 0.293103907 | Proliferation/Metastasis |
| 0.000117883 | Metabolism               |
| 0.000418351 | Proliferation/Metastasis |
| 0.001000884 | Proliferation/Metastasis |
| 0.621120203 | TME                      |
| 0.138958664 | TME                      |
| 0.67740122  | TME                      |
| 0.129872957 | TME                      |
| 0.00180906  | Metabolism               |
| 0.018456588 | Proliferation/Metastasis |
| 0.156951415 | Metabolism               |
| 0.183948463 | Metabolism               |
| 0.082720666 | Proliferation/Metastasis |
| 0.212534437 | Proliferation/Metastasis |
| 0.191745982 | Metabolism               |
| 0.111022034 | Metabolism               |
| 0.003325555 | Metabolism               |
| 0.013902428 | Metabolism               |
| 0.288951196 | TME                      |
| 0.376404944 | TME                      |
| 0.933401506 | TME                      |
| 0.139579485 | TME                      |
| 0.46316697  | TME                      |
| 0.152715077 | Metabolism               |
| 0.008660009 | Metabolism               |
| 0.166968434 | Metabolism               |
| 0.053950575 | Metabolism               |
| 0.741782427 | Metabolism               |
| 0.739622966 | TME                      |
| 0.916987889 | TME                      |
| 0.694680174 | TME                      |
| 0.070336817 | TME                      |
| 0.622894278 | TME                      |
| 0.179155365 | TME                      |
| 0.475100485 | TME                      |
| 0.548481434 | TME                      |
| 0.564046396 | TME                      |
| 0.606780999 | Proliferation/Metastasis |
| 0.796897834 | Proliferation/Metastasis |
| 0.003860423 | Metabolism               |
| 0.046491823 | Metabolism               |
| 0.266055969 | TME                      |

|             |                          |
|-------------|--------------------------|
| 0.759926307 | Metabolism               |
| 0.910855701 | Metabolism               |
| 0.007616371 | TME                      |
| 0.026649662 | Proliferation/Metastasis |
| 0.186858404 | Proliferation/Metastasis |
| 0.332626709 | TME                      |
| 0.154870806 | Metabolism               |
| 0.018748783 | Metabolism               |
| 0.421269387 | Proliferation/Metastasis |
| 0.34402     | Proliferation/Metastasis |
| 0.298696552 | TME                      |
| 0.513586969 | TME                      |
| 0.070079121 | TME                      |
| 0.948548823 | TME                      |
| 0.576371077 | Proliferation/Metastasis |
| 0.763073618 | TME                      |
| 0.18899277  | TME                      |
| 0.692269689 | Metabolism               |
| 0.080919148 | TME                      |
| 0.25906408  | TME                      |
| 0.298593402 | TME                      |
| 0.274877506 | TME                      |
| 0.504778622 | Metabolism               |
| 0.048188416 | Metabolism               |
| 0.000390246 | Metabolism               |
| 0.993918387 | TME                      |
| 0.197164346 | Metabolism               |
| 0.010203106 | TME                      |
| 0.019040552 | TME                      |
| 0.107701332 | TME                      |
| 0.651951896 | TME                      |
| 0.001255412 | TME                      |
| 0.00263457  | Metabolism               |
| 0.758661613 | Proliferation/Metastasis |
| 0.138621864 | Metabolism               |
| 0.388562134 | Proliferation/Metastasis |
| 0.050028545 | Metabolism               |
| 0.628436918 | Metabolism               |
| 0.496645937 | Metabolism               |
| 0.006173891 | Metabolism               |
| 0.091132646 | Metabolism               |
| 0.213132162 | Metabolism               |
| 0.369046478 | Metabolism               |

|             |                          |
|-------------|--------------------------|
| 0.521302314 | Metabolism               |
| 0.99677117  | Metabolism               |
| 0.642631782 | Metabolism               |
| 0.752369036 | Metabolism               |
| 0.27147864  | Metabolism               |
| 0.534356706 | Metabolism               |
| 0.015029158 | Metabolism               |
| 0.520237628 | TME                      |
| 0.497596127 | Proliferation/Metastasis |
| 0.644903244 | Metabolism               |
| 0.163764474 | Proliferation/Metastasis |
| 0.118777456 | TME                      |
| 0.737214753 | Proliferation/Metastasis |
| 0.331761715 | Proliferation/Metastasis |
| 0.561454391 | TME                      |
| 0.797148361 | TME                      |
| 0.111057115 | Metabolism               |
| 0.32489762  | Metabolism               |
| 0.016162298 | Proliferation/Metastasis |
| 0.057071607 | Proliferation/Metastasis |
| 0.475796891 | Proliferation/Metastasis |
| 0.285314865 | Metabolism               |
| 0.588218146 | Metabolism               |
| 0.309346708 | Metabolism               |
| 0.470034958 | Proliferation/Metastasis |
| 0.866074966 | TME                      |
| 0.198293423 | TME                      |
| 0.217105023 | Metabolism               |
| 0.816604827 | Proliferation/Metastasis |
| 0.291233531 | Metabolism               |
| 0.067372416 | TME                      |
| 0.005751675 | TME                      |
| 0.448915694 | TME                      |
| 0.979609503 | TME                      |
| 0.101605586 | Metabolism               |
| 0.507365002 | TME                      |
| 0.928356104 | Proliferation/Metastasis |
| 0.348699351 | TME                      |
| 0.414037436 | Proliferation/Metastasis |
| 0.057850148 | Proliferation/Metastasis |
| 0.280451855 | Metabolism               |
| 0.017286691 | Proliferation/Metastasis |
| 0.203556743 | TME                      |

|             |                          |
|-------------|--------------------------|
| 0.476224491 | Metabolism               |
| 0.195984992 | TME                      |
| 0.035933416 | TME                      |
| 0.110686236 | TME                      |
| 0.392408017 | TME                      |
| 0.765340173 | TME                      |
| 0.239164661 | TME                      |
| 0.80613062  | Metabolism               |
| 0.77772954  | TME                      |
| 0.89373442  | Metabolism               |
| 0.191587037 | Metabolism               |
| 0.411482828 | Proliferation/Metastasis |
| 0.595769872 | Proliferation/Metastasis |
| 0.058717462 | Metabolism               |
| 0.146753636 | Metabolism               |
| 0.724588603 | Metabolism               |
| 0.121865313 | Metabolism               |
| 0.40368886  | Proliferation/Metastasis |
| 0.127608621 | Proliferation/Metastasis |
| 0.641350327 | Metabolism               |
| 0.015520683 | Metabolism               |
| 0.156281868 | Metabolism               |
| 0.689444712 | TME                      |
| 0.015756698 | Metabolism               |
| 0.209629246 | Metabolism               |
| 0.017643917 | Metabolism               |
| 0.659026971 | Metabolism               |
| 0.661817445 | Proliferation/Metastasis |
| 0.001506845 | Metabolism               |
| 0.429079726 | Metabolism               |
| 0.281931915 | Metabolism               |
| 0.030477286 | Metabolism               |
| 0.004052986 | Metabolism               |
| 0.022919142 | Metabolism               |
| 0.359690955 | Proliferation/Metastasis |
| 0.29780203  | Metabolism               |
| 0.806167307 | Metabolism               |
| 0.002711713 | Proliferation/Metastasis |
| 0.980956816 | Metabolism               |
| 0.63359212  | Metabolism               |
| 0.935360373 | Metabolism               |
| 0.272533961 | Metabolism               |
| 0.174758376 | Metabolism               |

|             |                          |
|-------------|--------------------------|
| 0.24967663  | Metabolism               |
| 0.419627242 | Metabolism               |
| 0.004887239 | Metabolism               |
| 0.232987803 | TME                      |
| 0.165356217 | TME                      |
| 0.117293312 | TME                      |
| 0.158476616 | TME                      |
| 0.438807992 | TME                      |
| 0.362268039 | Metabolism               |
| 0.013196576 | Metabolism               |
| 0.376593851 | Proliferation/Metastasis |
| 0.056066322 | Metabolism               |
| 0.684280739 | Proliferation/Metastasis |
| 0.120720596 | Metabolism               |
| 0.236946736 | TME                      |
| 0.00975272  | Metabolism               |
| 0.197818237 | Metabolism               |
| 0.219521987 | Metabolism               |
| 0.027103442 | Metabolism               |
| 0.413458351 | TME                      |
| 0.489516771 | TME                      |
| 0.974157096 | Proliferation/Metastasis |
| 0.082291138 | Metabolism               |
| 0.048286143 | Proliferation/Metastasis |
| 0.728634888 | Proliferation/Metastasis |
| 0.242390675 | TME                      |
| 0.28882022  | TME                      |
| 0.190212493 | TME                      |
| 0.112414517 | TME                      |
| 0.081021416 | Metabolism               |
| 0.820288631 | Proliferation/Metastasis |
| 0.000101078 | Metabolism               |
| 0.090058009 | Metabolism               |
| 0.62274645  | Proliferation/Metastasis |
| 0.260255101 | Proliferation/Metastasis |
| 7.81E-05    | Metabolism               |
| 0.269199031 | Metabolism               |
| 0.038526072 | Metabolism               |
| 0.007722824 | Metabolism               |
| 0.907245918 | TME                      |
| 0.790652229 | TME                      |
| 0.026964521 | TME                      |
| 0.108196968 | TME                      |

|             |                          |
|-------------|--------------------------|
| 6.65E-07    | TME                      |
| 0.049253209 | Metabolism               |
| 0.1069526   | Metabolism               |
| 0.147713052 | Metabolism               |
| 0.239758913 | Metabolism               |
| 0.060827333 | Metabolism               |
| 0.354712175 | TME                      |
| 0.012144216 | TME                      |
| 0.16494155  | TME                      |
| 0.455400748 | TME                      |
| 0.144797252 | TME                      |
| 0.385814413 | TME                      |
| 0.327499234 | TME                      |
| 0.898381094 | TME                      |
| 0.24420426  | TME                      |
| 0.284452648 | Proliferation/Metastasis |
| 0.000221874 | Proliferation/Metastasis |
| 0.850036295 | Metabolism               |
| 0.066278376 | Metabolism               |
| 0.194859127 | TME                      |
| 0.401106474 | Metabolism               |
| 0.150845815 | Metabolism               |
| 0.721457959 | TME                      |
| 0.963270235 | Proliferation/Metastasis |
| 0.01405717  | Proliferation/Metastasis |
| 0.499811679 | TME                      |
| 0.468954982 | Metabolism               |
| 0.365668512 | Metabolism               |
| 0.017822322 | Proliferation/Metastasis |
| 0.49485742  | Proliferation/Metastasis |
| 0.349043351 | TME                      |
| 0.135815519 | TME                      |
| 0.340272916 | TME                      |
| 0.129619551 | TME                      |
| 0.4360692   | Proliferation/Metastasis |
| 0.179189274 | TME                      |
| 0.670436549 | TME                      |
| 0.001684343 | Metabolism               |
| 0.957672736 | TME                      |
| 0.535984334 | TME                      |
| 0.396429432 | TME                      |
| 0.545675805 | TME                      |
| 0.432549039 | Metabolism               |



|             |                          |
|-------------|--------------------------|
| 0.248074615 | Metabolism               |
| 0.000165441 | Metabolism               |
| 0.669727056 | TME                      |
| 0.634886152 | Metabolism               |
| 0.590043538 | TME                      |
| 0.779761302 | TME                      |
| 0.787447492 | TME                      |
| 0.996504204 | TME                      |
| 0.048951769 | TME                      |
| 0.155610777 | Metabolism               |
| 0.030788666 | Proliferation/Metastasis |
| 0.295566228 | Metabolism               |
| 0.002314488 | Proliferation/Metastasis |
| 0.686319188 | Metabolism               |
| 0.635960239 | Metabolism               |
| 0.044795351 | Metabolism               |
| 0.871257692 | Metabolism               |
| 0.046795416 | Metabolism               |
| 0.73677423  | Metabolism               |
| 0.712660331 | Metabolism               |
| 0.240830155 | Metabolism               |
| 0.029307902 | Metabolism               |
| 0.116548794 | Metabolism               |
| 0.68930462  | Metabolism               |
| 0.236849286 | Metabolism               |
| 0.007692356 | Metabolism               |
| 0.002709758 | Metabolism               |
| 0.355420056 | TME                      |
| 0.223633051 | Proliferation/Metastasis |
| 0.061283337 | Metabolism               |
| 4.15E-07    | Proliferation/Metastasis |
| 0.612758931 | TME                      |
| 0.022965395 | Proliferation/Metastasis |
| 0.024723217 | Proliferation/Metastasis |
| 0.457743075 | TME                      |
| 0.001921092 | TME                      |
| 0.75636948  | Metabolism               |
| 0.823952528 | Metabolism               |
| 4.65E-05    | Proliferation/Metastasis |
| 0.358046233 | Proliferation/Metastasis |
| 0.01086176  | Proliferation/Metastasis |
| 0.002213187 | Metabolism               |
| 0.000311151 | Metabolism               |

|             |                          |
|-------------|--------------------------|
| 0.001715425 | Metabolism               |
| 0.573337795 | Proliferation/Metastasis |
| 0.909990657 | TME                      |
| 0.453892547 | TME                      |
| 0.000417119 | Metabolism               |
| 0.011490284 | Proliferation/Metastasis |
| 0.035057044 | Metabolism               |
| 0.654550739 | TME                      |
| 0.036919807 | TME                      |
| 0.659289339 | TME                      |
| 0.441472152 | TME                      |
| 0.37326642  | Metabolism               |
| 5.28E-05    | TME                      |
| 0.308308013 | Proliferation/Metastasis |
| 0.002370802 | TME                      |
| 0.025208302 | Proliferation/Metastasis |
| 0.34978283  | Proliferation/Metastasis |
| 0.332516797 | Metabolism               |
| 0.959012583 | Proliferation/Metastasis |
| 0.462005596 | TME                      |
| 0.000657271 | Metabolism               |
| 0.728193081 | TME                      |
| 0.771368402 | TME                      |
| 0.652759472 | TME                      |
| 0.601666711 | TME                      |
| 0.264835628 | TME                      |
| 0.651514036 | TME                      |
| 0.0005998   | Metabolism               |
| 7.51E-06    | TME                      |
| 0.134769927 | Metabolism               |
| 0.222959548 | Metabolism               |
| 0.000638217 | Proliferation/Metastasis |
| 0.005879109 | Proliferation/Metastasis |
| 0.000442928 | Metabolism               |
| 0.009579512 | Metabolism               |
| 0.044836078 | Metabolism               |
| 0.24088932  | Metabolism               |
| 1.79E-10    | Proliferation/Metastasis |
| 0.04746092  | Proliferation/Metastasis |
| 0.328455445 | Metabolism               |
| 0.014422497 | Metabolism               |
| 0.347124924 | Metabolism               |
| 0.149453337 | TME                      |

|             |                          |
|-------------|--------------------------|
| 0.025690867 | Metabolism               |
| 0.224171649 | Metabolism               |
| 0.004177164 | Metabolism               |
| 0.272371824 | Metabolism               |
| 0.000271969 | Proliferation/Metastasis |
| 0.064038065 | Metabolism               |
| 0.170991401 | Metabolism               |
| 0.013296191 | Metabolism               |
| 0.175288062 | Metabolism               |
| 0.791182052 | Metabolism               |
| 0.397988573 | Metabolism               |
| 0.92283357  | Proliferation/Metastasis |
| 0.427125995 | Metabolism               |
| 0.051346042 | Metabolism               |
| 0.000883619 | Proliferation/Metastasis |
| 4.55E-09    | Metabolism               |
| 0.056679035 | Metabolism               |
| 0.086135973 | Metabolism               |
| 0.005894604 | Metabolism               |
| 0.025997975 | Metabolism               |
| 0.578631698 | Metabolism               |
| 0.098548595 | Metabolism               |
| 0.991884396 | Metabolism               |
| 0.407664111 | TME                      |
| 0.590199528 | TME                      |
| 0.23522445  | TME                      |
| 0.646281904 | TME                      |
| 0.441727191 | TME                      |
| 0.90705452  | Metabolism               |
| 0.000324057 | Metabolism               |
| 0.085797652 | Proliferation/Metastasis |
| 0.870889314 | Metabolism               |
| 0.000556539 | Proliferation/Metastasis |
| 0.001420104 | Metabolism               |
| 6.32E-07    | TME                      |
| 0.200636752 | Metabolism               |
| 0.027960327 | Metabolism               |
| 0.715571241 | Metabolism               |
| 0.02279995  | Metabolism               |
| 0.204259701 | TME                      |
| 0.623834624 | TME                      |
| 1.64E-06    | Proliferation/Metastasis |
| 0.398219154 | Metabolism               |

|             |                          |
|-------------|--------------------------|
| 0.769937818 | Proliferation/Metastasis |
| 0.129427302 | Proliferation/Metastasis |
| 0.038442636 | TME                      |
| 0.66790784  | TME                      |
| 0.908856846 | TME                      |
| 0.518595327 | TME                      |
| 0.321553625 | Metabolism               |
| 0.004675426 | Proliferation/Metastasis |
| 0.01616319  | Metabolism               |
| 0.415780116 | Metabolism               |
| 0.698597135 | Proliferation/Metastasis |
| 0.170201648 | Proliferation/Metastasis |
| 0.256145812 | Metabolism               |
| 0.149904478 | Metabolism               |
| 0.043909644 | Metabolism               |
| 0.539929468 | Metabolism               |
| 0.059897631 | TME                      |
| 0.359502442 | TME                      |
| 0.084493284 | TME                      |
| 0.624401277 | TME                      |
| 0.062562831 | TME                      |
| 0.212583199 | Metabolism               |
| 0.581110978 | Metabolism               |
| 0.812763402 | Metabolism               |
| 0.441833035 | Metabolism               |
| 7.55E-06    | Metabolism               |
| 0.011574836 | TME                      |
| 0.000347014 | TME                      |
| 0.201535793 | TME                      |
| 0.715805532 | TME                      |
| 0.193621705 | TME                      |
| 0.772712477 | TME                      |
| 0.691761665 | TME                      |
| 0.161850141 | TME                      |
| 0.365906669 | TME                      |
| 0.007500891 | Proliferation/Metastasis |
| 0.910317826 | Proliferation/Metastasis |
| 0.747959471 | Metabolism               |
| 0.111741998 | Metabolism               |
| 0.279348682 | TME                      |
| 0.712139118 | Metabolism               |
| 0.616276317 | Metabolism               |
| 0.543011385 | TME                      |

|             |                          |
|-------------|--------------------------|
| 6.54E-05    | Proliferation/Metastasis |
| 0.000234684 | Proliferation/Metastasis |
| 0.597304326 | TME                      |
| 0.239562069 | Metabolism               |
| 0.174558382 | Metabolism               |
| 0.018023243 | Proliferation/Metastasis |
| 0.252262916 | Proliferation/Metastasis |
| 0.435749097 | TME                      |
| 0.659426869 | TME                      |
| 0.94948112  | TME                      |
| 0.873421921 | TME                      |
| 0.201590223 | Proliferation/Metastasis |
| 0.76571822  | TME                      |
| 0.462653632 | TME                      |
| 6.77E-05    | Metabolism               |
| 0.391908528 | TME                      |
| 0.950252685 | TME                      |
| 0.471845525 | TME                      |
| 0.462699471 | TME                      |
| 0.004799631 | Metabolism               |
| 0.1761104   | Metabolism               |
| 0.445838066 | Metabolism               |
| 0.564156782 | TME                      |
| 0.069262712 | Metabolism               |
| 0.635393389 | TME                      |
| 0.136435996 | TME                      |
| 0.830525955 | TME                      |
| 0.399897661 | TME                      |
| 0.583755097 | TME                      |
| 0.116526391 | Metabolism               |
| 0.195168889 | Proliferation/Metastasis |
| 0.894017647 | Metabolism               |
| 0.399147992 | Proliferation/Metastasis |
| 0.032836568 | Metabolism               |
| 0.043754826 | Metabolism               |
| 0.007995932 | Metabolism               |
| 0.000224669 | Metabolism               |
| 0.717872302 | Metabolism               |
| 0.033417561 | Metabolism               |
| 0.251339905 | Metabolism               |
| 0.519048366 | Metabolism               |
| 0.010675115 | Metabolism               |
| 0.301314712 | Metabolism               |

|             |                          |
|-------------|--------------------------|
| 0.806884385 | Metabolism               |
| 0.077629975 | Metabolism               |
| 0.001880266 | Metabolism               |
| 0.06793352  | Metabolism               |
| 0.303692554 | TME                      |
| 0.947221866 | Proliferation/Metastasis |
| 0.200076137 | Metabolism               |
| 0.702751619 | Proliferation/Metastasis |
| 0.748863668 | TME                      |
| 0.29065889  | Proliferation/Metastasis |
| 0.089444453 | Proliferation/Metastasis |
| 0.475209635 | TME                      |
| 0.521313688 | TME                      |
| 0.002805611 | Metabolism               |
| 0.002180563 | Metabolism               |
| 0.004461966 | Proliferation/Metastasis |
| 0.283805389 | Proliferation/Metastasis |
| 0.004788733 | Proliferation/Metastasis |
| 0.003131434 | Metabolism               |
| 0.930265877 | Metabolism               |
| 0.277415686 | Metabolism               |
| 0.016404255 | Proliferation/Metastasis |
| 0.89305626  | TME                      |
| 0.825787518 | TME                      |
| 0.001344246 | Metabolism               |
| 0.039140803 | Proliferation/Metastasis |
| 0.002298909 | Metabolism               |
| 0.650846269 | TME                      |
| 0.929425782 | TME                      |
| 0.149745793 | TME                      |
| 0.239594814 | TME                      |
| 0.919106019 | Metabolism               |
| 0.077350285 | TME                      |
| 0.147469142 | Proliferation/Metastasis |
| 0.230646736 | TME                      |
| 0.548146319 | Proliferation/Metastasis |
| 0.166034898 | Proliferation/Metastasis |
| 4.72E-06    | Metabolism               |
| 0.039350493 | Proliferation/Metastasis |
| 0.335758282 | TME                      |
| 0.113212472 | Metabolism               |
| 0.731039874 | TME                      |
| 0.369721983 | TME                      |

|             |                          |
|-------------|--------------------------|
| 0.565597937 | TME                      |
| 0.962133711 | TME                      |
| 0.300247499 | TME                      |
| 0.903071056 | TME                      |
| 0.610133533 | Metabolism               |
| 0.001683176 | TME                      |
| 0.060331428 | Metabolism               |
| 0.000373091 | Metabolism               |
| 0.025682162 | Proliferation/Metastasis |
| 0.454774395 | Proliferation/Metastasis |
| 0.169305233 | Metabolism               |
| 0.155832778 | Metabolism               |
| 0.015247479 | Metabolism               |
| 0.003432273 | Metabolism               |
| 0.608217416 | Proliferation/Metastasis |
| 0.530029497 | Proliferation/Metastasis |
| 0.030124752 | Metabolism               |
| 0.590968109 | Metabolism               |
| 0.761904651 | Metabolism               |
| 0.659655373 | TME                      |
| 0.098584273 | Metabolism               |
| 0.108151388 | Metabolism               |
| 0.13402729  | Metabolism               |
| 0.948303304 | Metabolism               |
| 0.747378107 | Proliferation/Metastasis |
| 0.082170827 | Metabolism               |
| 0.016166949 | Metabolism               |
| 0.055055538 | Metabolism               |
| 0.015342341 | Metabolism               |
| 0.003188893 | Metabolism               |
| 0.317952226 | Metabolism               |
| 0.955934901 | Proliferation/Metastasis |
| 0.056541229 | Metabolism               |
| 0.13396429  | Metabolism               |
| 0.059788598 | Proliferation/Metastasis |
| 0.841681635 | Metabolism               |
| 0.198658463 | Metabolism               |
| 0.000362886 | Metabolism               |
| 0.034647196 | Metabolism               |
| 0.147838262 | Metabolism               |
| 0.023970897 | Metabolism               |
| 0.019851303 | Metabolism               |
| 0.521247056 | Metabolism               |

|             |                          |
|-------------|--------------------------|
| 0.364924985 | TME                      |
| 0.561516567 | TME                      |
| 0.087988877 | TME                      |
| 0.120196327 | TME                      |
| 0.975725665 | TME                      |
| 0.397536166 | Metabolism               |
| 0.179916162 | Metabolism               |
| 0.067422825 | Proliferation/Metastasis |
| 0.379642532 | Metabolism               |
| 0.09038929  | Proliferation/Metastasis |
| 0.065334605 | Metabolism               |
| 0.171388236 | TME                      |
| 0.221720569 | Metabolism               |
| 0.058078062 | Metabolism               |
| 0.225585698 | Metabolism               |
| 0.884265045 | Metabolism               |
| 0.095850293 | TME                      |
| 0.227173577 | TME                      |
| 0.003343301 | Proliferation/Metastasis |
| 0.101615838 | Metabolism               |
| 0.946121596 | Proliferation/Metastasis |
| 0.029172033 | Proliferation/Metastasis |
| 0.010881449 | TME                      |
| 0.000244078 | TME                      |
| 1.90E-06    | TME                      |
| 2.76E-06    | TME                      |
| 9.18E-05    | Metabolism               |
| 2.43E-05    | Proliferation/Metastasis |
| 0.152000074 | Metabolism               |
| 0.004219134 | Metabolism               |
| 0.003385452 | Proliferation/Metastasis |
| 0.007582297 | Proliferation/Metastasis |
| 0.005228474 | Metabolism               |
| 7.00E-05    | Metabolism               |
| 0.34784712  | Metabolism               |
| 0.131137473 | Metabolism               |
| 8.90E-05    | TME                      |
| 5.93E-12    | TME                      |
| 4.52E-07    | TME                      |
| 0.00170256  | TME                      |
| 0.887602589 | TME                      |
| 0.862697445 | Metabolism               |
| 0.000170599 | Metabolism               |



|             |                          |
|-------------|--------------------------|
| 0.069874103 | Metabolism               |
| 0.051895444 | Metabolism               |
| 0.37117166  | Metabolism               |
| 1.05E-07    | TME                      |
| 0.08651851  | TME                      |
| 4.13E-08    | TME                      |
| 7.23E-08    | TME                      |
| 5.32E-06    | TME                      |
| 6.67E-09    | TME                      |
| 3.54E-08    | TME                      |
| 0.000128313 | TME                      |
| 1.95E-05    | TME                      |
| 3.06E-09    | Proliferation/Metastasis |
| 0.002427142 | Proliferation/Metastasis |
| 1.49E-05    | Metabolism               |
| 2.96E-12    | Metabolism               |
| 4.77E-08    | TME                      |
| 0.17803094  | Metabolism               |
| 0.742169282 | Metabolism               |
| 7.85E-08    | TME                      |
| 1.40E-14    | Proliferation/Metastasis |
| 1.98E-12    | Proliferation/Metastasis |
| 9.65E-06    | TME                      |
| 0.294945071 | Metabolism               |
| 1.98E-07    | Metabolism               |
| 4.11E-13    | Proliferation/Metastasis |
| 0.0002027   | Proliferation/Metastasis |
| 7.08E-10    | TME                      |
| 6.96E-09    | TME                      |
| 1.35E-08    | TME                      |
| 1.64E-06    | TME                      |
| 2.06E-05    | Proliferation/Metastasis |
| 4.26E-05    | TME                      |
| 2.46E-08    | TME                      |
| 0.000228504 | Metabolism               |
| 6.91E-12    | TME                      |
| 1.34E-10    | TME                      |
| 2.71E-06    | TME                      |
| 0.569842212 | TME                      |
| 0.886100794 | Metabolism               |
| 0.35369797  | Metabolism               |
| 3.00E-07    | Metabolism               |
| 9.13E-06    | TME                      |

|             |                          |
|-------------|--------------------------|
| 0.000278326 | Metabolism               |
| 1.57E-08    | TME                      |
| 2.28E-05    | TME                      |
| 2.78E-07    | TME                      |
| 0.017131722 | TME                      |
| 0.000431115 | TME                      |
| 0.00990054  | Metabolism               |
| 9.91E-11    | Proliferation/Metastasis |
| 0.000621827 | Metabolism               |
| 4.69E-05    | Proliferation/Metastasis |
| 1.20E-07    | Metabolism               |
| 0.795309819 | Metabolism               |
| 0.318967806 | Metabolism               |
| 0.012319817 | Metabolism               |
| 0.001572124 | Metabolism               |
| 0.90326283  | Metabolism               |
| 0.215283373 | Metabolism               |
| 0.514966526 | Metabolism               |
| 0.053003622 | Metabolism               |
| 0.011545773 | Metabolism               |
| 0.152174799 | Metabolism               |
| 0.593915774 | Metabolism               |
| 6.92E-06    | Metabolism               |
| 8.08E-06    | Metabolism               |
| 5.92E-06    | TME                      |
| 1.57E-05    | Proliferation/Metastasis |
| 0.179288355 | Metabolism               |
| 0.281897409 | Proliferation/Metastasis |
| 2.48E-08    | TME                      |
| 1.06E-07    | Proliferation/Metastasis |
| 4.50E-08    | Proliferation/Metastasis |
| 0.000360404 | TME                      |
| 1.10E-05    | TME                      |
| 2.81E-07    | Metabolism               |
| 1.59E-05    | Metabolism               |
| 0.001149043 | Proliferation/Metastasis |
| 3.49E-14    | Proliferation/Metastasis |
| 1.15E-10    | Proliferation/Metastasis |
| 0.040834707 | Metabolism               |
| 0.003515882 | Metabolism               |
| 8.45E-06    | Metabolism               |
| 0.006253538 | Proliferation/Metastasis |
| 3.07E-07    | TME                      |

|             |                          |
|-------------|--------------------------|
| 9.64E-06    | TME                      |
| 0.039084944 | Metabolism               |
| 4.87E-05    | Proliferation/Metastasis |
| 0.028504605 | Metabolism               |
| 5.78E-09    | TME                      |
| 1.51E-06    | TME                      |
| 0.023723307 | TME                      |
| 1.31E-07    | TME                      |
| 0.633123936 | Metabolism               |
| 0.721764892 | TME                      |
| 0.891116402 | Proliferation/Metastasis |
| 3.18E-08    | TME                      |
| 0.539666804 | Proliferation/Metastasis |
| 4.36E-10    | Proliferation/Metastasis |
| 0.006582649 | Metabolism               |
| 5.55E-18    | Proliferation/Metastasis |
| 2.45E-09    | TME                      |
| 0.000493566 | Metabolism               |
| 0.001518181 | TME                      |
| 1.54E-10    | TME                      |
| 9.32E-06    | TME                      |
| 3.74E-09    | TME                      |
| 0.712424872 | TME                      |
| 1.18E-11    | TME                      |
| 0.535662918 | Metabolism               |
| 0.000257181 | TME                      |
| 0.038776259 | Metabolism               |
| 0.359914333 | Metabolism               |
| 5.90E-05    | Proliferation/Metastasis |
| 0.154534383 | Proliferation/Metastasis |
| 1.78E-10    | Metabolism               |
| 0.848501721 | Metabolism               |
| 0.484678552 | Metabolism               |
| 1.27E-06    | Metabolism               |
| 0.892916137 | Proliferation/Metastasis |
| 0.904500439 | Proliferation/Metastasis |
| 0.695189173 | Metabolism               |
| 0.020551763 | Metabolism               |
| 1.95E-06    | Metabolism               |
| 0.000377981 | TME                      |
| 0.536577244 | Metabolism               |
| 0.005191172 | Metabolism               |
| 0.049931858 | Metabolism               |

|             |                          |
|-------------|--------------------------|
| 0.422460457 | Metabolism               |
| 0.245825582 | Proliferation/Metastasis |
| 2.77E-05    | Metabolism               |
| 0.010378757 | Metabolism               |
| 0.178434008 | Metabolism               |
| 1.12E-17    | Metabolism               |
| 4.41E-18    | Metabolism               |
| 1.38E-06    | Metabolism               |
| 0.008870049 | Proliferation/Metastasis |
| 0.210876754 | Metabolism               |
| 0.009016323 | Metabolism               |
| 1.12E-07    | Proliferation/Metastasis |
| 3.10E-05    | Metabolism               |
| 0.512416524 | Metabolism               |
| 0.236594479 | Metabolism               |
| 0.86825754  | Metabolism               |
| 0.000469221 | Metabolism               |
| 0.43122097  | Metabolism               |
| 0.596891523 | Metabolism               |
| 0.011732865 | Metabolism               |
| 8.40E-09    | TME                      |
| 1.21E-07    | TME                      |
| 6.98E-07    | TME                      |
| 1.78E-08    | TME                      |
| 1.66E-07    | TME                      |
| 0.030362858 | Metabolism               |
| 1.60E-05    | Metabolism               |
| 0.00022135  | Proliferation/Metastasis |
| 0.166812771 | Metabolism               |
| 0.001981013 | Proliferation/Metastasis |
| 0.415768353 | Metabolism               |
| 0.641754893 | TME                      |
| 0.270423745 | Metabolism               |
| 7.83E-10    | Metabolism               |
| 0.92869243  | Metabolism               |
| 0.00594635  | Metabolism               |
| 0.000608748 | TME                      |
| 1.34E-05    | TME                      |
| 0.050432899 | Proliferation/Metastasis |
| 0.003279452 | Metabolism               |
| 0.158023688 | Proliferation/Metastasis |
| 0.355374227 | Proliferation/Metastasis |
| 3.07E-05    | TME                      |

|             |                          |
|-------------|--------------------------|
| 0.122402881 | TME                      |
| 0.29062351  | TME                      |
| 0.47132803  | TME                      |
| 0.824359753 | Metabolism               |
| 0.474400548 | Proliferation/Metastasis |
| 0.179086293 | Metabolism               |
| 0.064878359 | Metabolism               |
| 0.110012564 | Proliferation/Metastasis |
| 0.096028428 | Proliferation/Metastasis |
| 0.000351436 | Metabolism               |
| 0.188038008 | Metabolism               |
| 0.539543228 | Metabolism               |
| 0.269382115 | Metabolism               |
| 0.589871047 | TME                      |
| 0.073611925 | TME                      |
| 0.753861557 | TME                      |
| 0.68141277  | TME                      |
| 0.002328079 | TME                      |
| 0.46928358  | Metabolism               |
| 0.53582182  | Metabolism               |
| 0.262158459 | Metabolism               |
| 0.409652888 | Metabolism               |
| 0.085742192 | Metabolism               |
| 0.058241867 | TME                      |
| 0.348257676 | TME                      |
| 0.00269848  | TME                      |
| 0.083632974 | TME                      |
| 0.818670767 | TME                      |
| 0.621276237 | TME                      |
| 0.61620677  | TME                      |
| 0.29332209  | TME                      |
| 0.492046688 | TME                      |
| 0.805825616 | Proliferation/Metastasis |
| 0.163095604 | Proliferation/Metastasis |
| 0.879845683 | Metabolism               |
| 0.74914139  | Metabolism               |
| 0.14212702  | TME                      |
| 0.496759738 | Metabolism               |
| 0.096614219 | Metabolism               |
| 0.324816683 | TME                      |
| 0.509731322 | Proliferation/Metastasis |
| 0.985765972 | Proliferation/Metastasis |
| 0.435917789 | TME                      |

|             |                          |
|-------------|--------------------------|
| 0.077111288 | Metabolism               |
| 0.382705227 | Metabolism               |
| 0.604366146 | Proliferation/Metastasis |
| 0.089055808 | Proliferation/Metastasis |
| 0.526281889 | TME                      |
| 0.014476354 | TME                      |
| 0.266710337 | TME                      |
| 0.422987511 | TME                      |
| 0.562204615 | Proliferation/Metastasis |
| 0.02207402  | TME                      |
| 0.187864542 | TME                      |
| 0.271625405 | Metabolism               |
| 0.106178265 | TME                      |
| 0.136062989 | TME                      |
| 0.698712579 | TME                      |
| 0.418617964 | TME                      |
| 0.521579526 | Metabolism               |
| 0.844226701 | Metabolism               |
| 0.907198841 | Metabolism               |
| 0.023127963 | TME                      |
| 0.167824204 | Metabolism               |
| 0.215388156 | TME                      |
| 0.107133288 | TME                      |
| 0.03460101  | TME                      |
| 0.810095906 | TME                      |
| 0.580207865 | TME                      |
| 0.754311141 | Metabolism               |
| 0.868285061 | Proliferation/Metastasis |
| 0.790699334 | Metabolism               |
| 0.001273764 | Proliferation/Metastasis |
| 0.113228622 | Metabolism               |
| 0.309644696 | Metabolism               |
| 0.873630704 | Metabolism               |
| 0.516661119 | Metabolism               |
| 0.821536767 | Metabolism               |
| 0.067207215 | Metabolism               |
| 0.011522484 | Metabolism               |
| 0.136113953 | Metabolism               |
| 0.563642866 | Metabolism               |
| 0.038075158 | Metabolism               |
| 0.071797668 | Metabolism               |
| 0.039448298 | Metabolism               |
| 0.489527251 | Metabolism               |

|             |                          |
|-------------|--------------------------|
| 0.843550475 | Metabolism               |
| 0.821618354 | TME                      |
| 0.000443097 | Proliferation/Metastasis |
| 0.273770714 | Metabolism               |
| 0.000521875 | Proliferation/Metastasis |
| 0.171968084 | TME                      |
| 0.000902364 | Proliferation/Metastasis |
| 0.042537054 | Proliferation/Metastasis |
| 0.132288174 | TME                      |
| 0.256502579 | TME                      |
| 0.1084087   | Metabolism               |
| 0.008580418 | Metabolism               |
| 0.941727722 | Proliferation/Metastasis |
| 0.857854489 | Proliferation/Metastasis |
| 0.005950883 | Proliferation/Metastasis |
| 0.18413181  | Metabolism               |
| 0.266874099 | Metabolism               |
| 0.030705966 | Metabolism               |
| 0.203399909 | Proliferation/Metastasis |
| 0.096590636 | TME                      |
| 0.039238791 | TME                      |
| 0.06794367  | Metabolism               |
| 0.000306108 | Proliferation/Metastasis |
| 0.008921411 | Metabolism               |
| 0.250546588 | TME                      |
| 0.114928142 | TME                      |
| 0.022347189 | TME                      |
| 0.268376776 | TME                      |
| 0.036760144 | Metabolism               |
| 0.909860343 | TME                      |
| 0.341694775 | Proliferation/Metastasis |
| 0.043365248 | TME                      |
| 0.000821562 | Proliferation/Metastasis |
| 0.041764436 | Proliferation/Metastasis |
| 0.932673757 | Metabolism               |
| 0.603198708 | Proliferation/Metastasis |
| 0.282047963 | TME                      |
| 0.121235084 | Metabolism               |
| 0.056975088 | TME                      |
| 0.122720997 | TME                      |
| 0.111939999 | TME                      |
| 0.274536098 | TME                      |
| 0.94820754  | TME                      |

|             |                          |
|-------------|--------------------------|
| 0.084683752 | TME                      |
| 0.004679251 | Metabolism               |
| 0.072076634 | TME                      |
| 0.009702519 | Metabolism               |
| 0.63775777  | Metabolism               |
| 0.046905502 | Proliferation/Metastasis |
| 0.03694455  | Proliferation/Metastasis |
| 0.125694223 | Metabolism               |
| 0.193893743 | Metabolism               |
| 2.32E-05    | Metabolism               |
| 0.300535855 | Metabolism               |
| 0.000356368 | Proliferation/Metastasis |
| 0.007984626 | Proliferation/Metastasis |
| 0.507327157 | Metabolism               |
| 0.154697302 | Metabolism               |
| 0.411387076 | Metabolism               |
| 0.279624776 | TME                      |
| 0.015174496 | Metabolism               |
| 0.63196944  | Metabolism               |
| 0.829436086 | Metabolism               |
| 0.001481567 | Metabolism               |
| 0.000218154 | Proliferation/Metastasis |
| 0.279938043 | Metabolism               |
| 0.866619857 | Metabolism               |
| 0.742358242 | Metabolism               |
| 0.880486286 | Metabolism               |
| 0.36160346  | Metabolism               |
| 0.593298855 | Metabolism               |
| 0.839654141 | Proliferation/Metastasis |
| 0.005953513 | Metabolism               |
| 0.242743409 | Metabolism               |
| 1.99E-05    | Proliferation/Metastasis |
| 0.288986626 | Metabolism               |
| 0.716637494 | Metabolism               |
| 0.706318015 | Metabolism               |
| 0.043703755 | Metabolism               |
| 0.459279132 | Metabolism               |
| 0.029592466 | Metabolism               |
| 0.966465435 | Metabolism               |
| 0.737401658 | Metabolism               |
| 0.377297481 | TME                      |
| 0.603778755 | TME                      |
| 0.086900575 | TME                      |



|             |                          |
|-------------|--------------------------|
| 0.482939245 | TME                      |
| 0.761589092 | TME                      |
| 0.05193759  | Metabolism               |
| 0.82215947  | Metabolism               |
| 0.006865899 | Proliferation/Metastasis |
| 0.018766861 | Metabolism               |
| 0.001426474 | Proliferation/Metastasis |
| 0.929138725 | Metabolism               |
| 0.006224701 | TME                      |
| 0.000642752 | Metabolism               |
| 0.454044043 | Metabolism               |
| 0.682935159 | Metabolism               |
| 0.501114213 | Metabolism               |
| 0.460660531 | TME                      |
| 0.075708724 | TME                      |
| 0.000351161 | Proliferation/Metastasis |
| 0.065603619 | Metabolism               |
| 0.118535846 | Proliferation/Metastasis |
| 0.346776122 | Proliferation/Metastasis |
| 0.373969697 | TME                      |
| 0.3584416   | TME                      |
| 0.292053059 | TME                      |
| 0.193060886 | TME                      |
| 0.229222298 | Metabolism               |
| 0.089025684 | Proliferation/Metastasis |
| 0.26570895  | Metabolism               |
| 0.00444838  | Metabolism               |
| 0.974660761 | Proliferation/Metastasis |
| 0.050282517 | Proliferation/Metastasis |
| 0.049663353 | Metabolism               |
| 0.568785099 | Metabolism               |
| 0.486385883 | Metabolism               |
| 0.007010903 | Metabolism               |
| 0.208560209 | TME                      |
| 0.228080118 | TME                      |
| 0.000153834 | TME                      |
| 0.000102084 | TME                      |
| 2.16E-14    | TME                      |
| 0.327730185 | Metabolism               |
| 0.285542298 | Metabolism               |
| 4.21E-05    | Metabolism               |
| 0.002543492 | Metabolism               |
| 0.407905041 | Metabolism               |

|             |                          |
|-------------|--------------------------|
| 0.580791551 | TME                      |
| 4.16E-10    | TME                      |
| 0.223536265 | TME                      |
| 0.395820687 | TME                      |
| 0.638726891 | TME                      |
| 0.19545924  | TME                      |
| 0.270766577 | TME                      |
| 0.681463988 | TME                      |
| 0.583025809 | TME                      |
| 0.04285     | Proliferation/Metastasis |
| 0.103397886 | Proliferation/Metastasis |
| 0.799795748 | Metabolism               |
| 0.873209456 | Metabolism               |
| 0.178171672 | TME                      |
| 0.104170908 | Metabolism               |
| 0.028895021 | Metabolism               |
| 0.602890179 | TME                      |
| 0.058463458 | Proliferation/Metastasis |
| 0.988926257 | Proliferation/Metastasis |
| 0.039046349 | TME                      |
| 0.048079538 | Metabolism               |
| 0.063695543 | Metabolism               |
| 0.790648007 | Proliferation/Metastasis |
| 0.076854698 | Proliferation/Metastasis |
| 0.035869408 | TME                      |
| 0.011894789 | TME                      |
| 0.248597235 | TME                      |
| 0.556744928 | TME                      |
| 0.968781714 | Proliferation/Metastasis |
| 0.325985548 | TME                      |
| 0.790238944 | TME                      |
| 0.903334702 | Metabolism               |
| 0.765051993 | TME                      |
| 0.514123398 | TME                      |
| 0.596876089 | TME                      |
| 0.048781247 | TME                      |
| 0.000423777 | Metabolism               |
| 0.000904494 | Metabolism               |
| 0.013549766 | Metabolism               |
| 0.124942063 | TME                      |
| 0.545576689 | Metabolism               |
| 0.530467744 | TME                      |
| 0.215777064 | TME                      |

|             |                          |
|-------------|--------------------------|
| 0.120408222 | TME                      |
| 0.925060728 | TME                      |
| 0.158252847 | TME                      |
| 0.100438118 | Metabolism               |
| 0.884962045 | Proliferation/Metastasis |
| 0.006734583 | Metabolism               |
| 0.022550989 | Proliferation/Metastasis |
| 0.233402983 | Metabolism               |
| 0.015608145 | Metabolism               |
| 0.905772059 | Metabolism               |
| 0.323331133 | Metabolism               |
| 0.006838832 | Metabolism               |
| 0.001179729 | Metabolism               |
| 0.050585137 | Metabolism               |
| 0.834684369 | Metabolism               |
| 0.003361023 | Metabolism               |
| 0.755594734 | Metabolism               |
| 0.033149218 | Metabolism               |
| 0.143977019 | Metabolism               |
| 0.385848147 | Metabolism               |
| 0.023516593 | Metabolism               |
| 0.655920098 | TME                      |
| 0.02914532  | Proliferation/Metastasis |
| 0.01492103  | Metabolism               |
| 4.65E-18    | Proliferation/Metastasis |
| 0.994733217 | TME                      |
| 0.001894436 | Proliferation/Metastasis |
| 0.015642532 | Proliferation/Metastasis |
| 0.622231743 | TME                      |
| 0.00121625  | TME                      |
| 0.102633405 | Metabolism               |
| 0.34864344  | Metabolism               |
| 0.169355325 | Proliferation/Metastasis |
| 0.002216582 | Proliferation/Metastasis |
| 0.033944243 | Proliferation/Metastasis |
| 0.978543167 | Metabolism               |
| 3.56E-06    | Metabolism               |
| 0.00304447  | Metabolism               |
| 0.693321348 | Proliferation/Metastasis |
| 0.066262211 | TME                      |
| 0.002389082 | TME                      |
| 0.128431453 | Metabolism               |
| 1.10E-05    | Proliferation/Metastasis |

|             |                          |
|-------------|--------------------------|
| 0.13076734  | Metabolism               |
| 0.145175278 | TME                      |
| 0.379755125 | TME                      |
| 0.039640432 | TME                      |
| 0.188996856 | TME                      |
| 0.28756474  | Metabolism               |
| 6.37E-05    | TME                      |
| 0.139655278 | Proliferation/Metastasis |
| 0.003715063 | TME                      |
| 6.41E-06    | Proliferation/Metastasis |
| 5.03E-07    | Proliferation/Metastasis |
| 0.076289177 | Metabolism               |
| 0.008811062 | Proliferation/Metastasis |
| 0.855925898 | TME                      |
| 6.99E-05    | Metabolism               |
| 0.524767944 | TME                      |
| 0.266590714 | TME                      |
| 0.009548664 | TME                      |
| 0.720235793 | TME                      |
| 0.408311896 | TME                      |
| 0.992736531 | TME                      |
| 1.71E-10    | Metabolism               |
| 0.00012262  | TME                      |
| 0.266059346 | Metabolism               |
| 0.004174757 | Metabolism               |
| 2.21E-07    | Proliferation/Metastasis |
| 0.00017411  | Proliferation/Metastasis |
| 0.117776602 | Metabolism               |
| 1.59E-05    | Metabolism               |
| 0.000374279 | Metabolism               |
| 0.02684474  | Metabolism               |
| 5.11E-21    | Proliferation/Metastasis |
| 8.56E-06    | Proliferation/Metastasis |
| 0.205388868 | Metabolism               |
| 0.093888144 | Metabolism               |
| 0.017428223 | Metabolism               |
| 0.309053503 | TME                      |
| 0.173171517 | Metabolism               |
| 0.534076885 | Metabolism               |
| 0.355054634 | Metabolism               |
| 0.163431353 | Metabolism               |
| 1.10E-13    | Proliferation/Metastasis |
| 0.444324419 | Metabolism               |

|             |                          |
|-------------|--------------------------|
| 0.00570719  | Metabolism               |
| 0.000199978 | Metabolism               |
| 0.729051338 | Metabolism               |
| 0.025774036 | Metabolism               |
| 0.101667551 | Metabolism               |
| 0.854654309 | Proliferation/Metastasis |
| 0.568946114 | Metabolism               |
| 0.008884421 | Metabolism               |
| 0.004165127 | Proliferation/Metastasis |
| 3.80E-11    | Metabolism               |
| 0.107234381 | Metabolism               |
| 0.094918678 | Metabolism               |
| 0.00087971  | Metabolism               |
| 0.035981535 | Metabolism               |
| 0.717646676 | Metabolism               |
| 0.058650938 | Metabolism               |
| 0.421219205 | Metabolism               |
| 0.080413895 | TME                      |
| 0.549740587 | TME                      |
| 0.010103487 | TME                      |
| 0.3481575   | TME                      |
| 0.311528388 | TME                      |
| 7.30E-05    | Metabolism               |
| 0.068309996 | Metabolism               |
| 0.051631488 | Proliferation/Metastasis |
| 0.005828691 | Metabolism               |
| 1.10E-08    | Proliferation/Metastasis |
| 0.000882159 | Metabolism               |
| 7.30E-14    | TME                      |
| 0.511344183 | Metabolism               |
| 0.768747863 | Metabolism               |
| 0.489251551 | Metabolism               |
| 0.000874197 | Metabolism               |
| 0.016480327 | TME                      |
| 0.339755758 | TME                      |
| 3.80E-07    | Proliferation/Metastasis |
| 0.091987584 | Metabolism               |
| 0.015834546 | Proliferation/Metastasis |
| 0.033451359 | Proliferation/Metastasis |
| 0.539233843 | TME                      |
| 0.506483225 | TME                      |
| 0.294594148 | TME                      |
| 0.287510967 | TME                      |

|             |                          |
|-------------|--------------------------|
| 0.049526557 | Metabolism               |
| 0.002953313 | Proliferation/Metastasis |
| 0.874511906 | Metabolism               |
| 0.000238328 | Metabolism               |
| 0.087149586 | Proliferation/Metastasis |
| 0.449335469 | Proliferation/Metastasis |
| 0.852934139 | Metabolism               |
| 0.004502339 | Metabolism               |
| 0.036337438 | Metabolism               |
| 0.693178914 | Metabolism               |
| 0.162979033 | TME                      |
| 0.149402254 | TME                      |
| 0.064801228 | TME                      |
| 0.133977314 | TME                      |
| 0.112253919 | TME                      |
| 0.577491779 | Metabolism               |
| 0.002436528 | Metabolism               |
| 0.627884364 | Metabolism               |
| 0.689469011 | Metabolism               |
| 0.176672638 | Metabolism               |
| 0.180806589 | TME                      |
| 0.06751264  | TME                      |
| 0.956170969 | TME                      |
| 0.673536778 | TME                      |
| 0.426524862 | TME                      |
| 0.194872691 | TME                      |
| 0.210155659 | TME                      |
| 0.895640906 | TME                      |
| 0.88746943  | TME                      |
| 4.63E-05    | Proliferation/Metastasis |
| 0.155753468 | Proliferation/Metastasis |
| 0.043258571 | Metabolism               |
| 0.013654205 | Metabolism               |
| 0.291448154 | TME                      |
| 0.021257847 | Metabolism               |
| 0.603415791 | Metabolism               |
| 0.653692525 | TME                      |
| 0.010458491 | Proliferation/Metastasis |
| 0.017155122 | Proliferation/Metastasis |
| 0.312981999 | TME                      |
| 0.970549308 | Metabolism               |
| 0.01931043  | Metabolism               |
| 0.004023521 | Proliferation/Metastasis |

|             |                          |
|-------------|--------------------------|
| 0.19309022  | Proliferation/Metastasis |
| 0.116884976 | TME                      |
| 0.474033308 | TME                      |
| 0.368347037 | TME                      |
| 0.419356759 | TME                      |
| 0.004739736 | Proliferation/Metastasis |
| 0.704853173 | TME                      |
| 0.643091687 | TME                      |
| 0.539746029 | Metabolism               |
| 0.195176704 | TME                      |
| 0.205680091 | TME                      |
| 0.446787892 | TME                      |
| 0.575646916 | TME                      |
| 0.715226884 | Metabolism               |
| 0.896980951 | Metabolism               |
| 0.000946751 | Metabolism               |
| 0.952152217 | TME                      |
| 0.089925744 | Metabolism               |
| 0.231342028 | TME                      |
| 0.558737389 | TME                      |
| 0.557219295 | TME                      |
| 0.46965799  | TME                      |
| 0.781748047 | TME                      |
| 0.009156259 | Metabolism               |
| 0.000978704 | Proliferation/Metastasis |
| 0.000825184 | Metabolism               |
| 0.656729145 | Proliferation/Metastasis |
| 0.000653533 | Metabolism               |
| 0.584025733 | Metabolism               |
| 0.359884338 | Metabolism               |
| 0.01935276  | Metabolism               |
| 0.005052744 | Metabolism               |
| 0.300934151 | Metabolism               |
| 0.648901764 | Metabolism               |
| 0.218646531 | Metabolism               |
| 0.073804849 | Metabolism               |
| 0.110785318 | Metabolism               |
| 0.430291927 | Metabolism               |
| 0.680923343 | Metabolism               |
| 0.078194821 | Metabolism               |
| 0.009841895 | Metabolism               |
| 0.976241732 | TME                      |
| 0.804083038 | Proliferation/Metastasis |

|             |                          |
|-------------|--------------------------|
| 0.506840024 | Metabolism               |
| 0.023098716 | Proliferation/Metastasis |
| 0.601972039 | TME                      |
| 0.419660338 | Proliferation/Metastasis |
| 0.317453284 | Proliferation/Metastasis |
| 0.404945442 | TME                      |
| 0.73330633  | TME                      |
| 0.274757321 | Metabolism               |
| 0.605638783 | Metabolism               |
| 0.041388126 | Proliferation/Metastasis |
| 0.001514048 | Proliferation/Metastasis |
| 0.892997241 | Proliferation/Metastasis |
| 0.486088738 | Metabolism               |
| 0.076072036 | Metabolism               |
| 0.045845466 | Metabolism               |
| 0.023230612 | Proliferation/Metastasis |
| 0.885538377 | TME                      |
| 0.398081959 | TME                      |
| 0.347452872 | Metabolism               |
| 0.187764137 | Proliferation/Metastasis |
| 0.11695744  | Metabolism               |
| 0.304652957 | TME                      |
| 0.811586513 | TME                      |
| 0.788694009 | TME                      |
| 0.189198345 | TME                      |
| 0.538023853 | Metabolism               |
| 0.011362683 | TME                      |
| 0.003469928 | Proliferation/Metastasis |
| 0.542657748 | TME                      |
| 0.003939527 | Proliferation/Metastasis |
| 1.06E-05    | Proliferation/Metastasis |
| 0.363950251 | Metabolism               |
| 0.005226575 | Proliferation/Metastasis |
| 0.637507127 | TME                      |
| 0.115242831 | Metabolism               |
| 0.550014085 | TME                      |
| 0.345411095 | TME                      |
| 0.153391181 | TME                      |
| 0.512408485 | TME                      |
| 0.708204039 | TME                      |
| 0.31331061  | TME                      |
| 0.050176128 | Metabolism               |
| 0.577261896 | TME                      |



|             |                          |
|-------------|--------------------------|
| 0.514699951 | Metabolism               |
| 0.106652142 | Metabolism               |
| 0.204597718 | Proliferation/Metastasis |
| 0.349562477 | Proliferation/Metastasis |
| 0.000187363 | Metabolism               |
| 0.943249038 | Metabolism               |
| 0.662861409 | Metabolism               |
| 0.028454058 | Metabolism               |
| 0.000903705 | Proliferation/Metastasis |
| 0.000388603 | Proliferation/Metastasis |
| 0.050415371 | Metabolism               |
| 0.079986456 | Metabolism               |
| 0.001344915 | Metabolism               |
| 0.358488777 | TME                      |
| 0.361520068 | Metabolism               |
| 0.933930023 | Metabolism               |
| 0.685935285 | Metabolism               |
| 0.036436245 | Metabolism               |
| 3.22E-06    | Proliferation/Metastasis |
| 0.009109072 | Metabolism               |
| 0.01455212  | Metabolism               |
| 0.944986747 | Metabolism               |
| 0.004956804 | Metabolism               |
| 0.00892881  | Metabolism               |
| 0.025112659 | Metabolism               |
| 0.267974414 | Proliferation/Metastasis |
| 0.953823922 | Metabolism               |
| 0.391239697 | Metabolism               |
| 0.406745935 | Proliferation/Metastasis |
| 0.551930486 | Metabolism               |
| 0.024936351 | Metabolism               |
| 0.880343313 | Metabolism               |
| 0.019167079 | Metabolism               |
| 0.000437474 | Metabolism               |
| 0.461433038 | Metabolism               |
| 0.688506162 | Metabolism               |
| 0.952058686 | Metabolism               |
| 0.142198936 | TME                      |
| 0.590778085 | TME                      |
| 0.335872945 | TME                      |
| 0.219787883 | TME                      |
| 0.231959688 | TME                      |
| 0.20138696  | Metabolism               |

|             |                          |
|-------------|--------------------------|
| 0.020003404 | Metabolism               |
| 0.293042974 | Proliferation/Metastasis |
| 0.476433571 | Metabolism               |
| 0.461024995 | Proliferation/Metastasis |
| 0.95684704  | Metabolism               |
| 0.089887168 | TME                      |
| 0.377363909 | Metabolism               |
| 0.007073144 | Metabolism               |
| 0.811218482 | Metabolism               |
| 0.495793353 | Metabolism               |
| 0.769163314 | TME                      |
| 0.715717185 | TME                      |
| 0.008291902 | Proliferation/Metastasis |
| 0.396980757 | Metabolism               |
| 0.158201071 | Proliferation/Metastasis |
| 0.216469845 | Proliferation/Metastasis |
| 0.432606602 | TME                      |
| 0.00021696  | TME                      |
| 0.00183502  | TME                      |
| 0.000127539 | TME                      |
| 0.878562606 | Metabolism               |
| 0.001382669 | Proliferation/Metastasis |
| 0.640283338 | Metabolism               |
| 0.0069136   | Metabolism               |
| 0.003231691 | Proliferation/Metastasis |
| 0.000162459 | Proliferation/Metastasis |
| 4.40E-06    | Metabolism               |
| 2.86E-05    | Metabolism               |
| 9.76E-05    | Metabolism               |
| 0.126445844 | Metabolism               |
| 6.44E-05    | TME                      |
| 8.60E-05    | TME                      |
| 8.58E-06    | TME                      |
| 0.075805614 | TME                      |
| 4.82E-05    | TME                      |
| 0.016168438 | Metabolism               |
| 0.458220253 | Metabolism               |
| 0.457955171 | Metabolism               |
| 0.615363329 | Metabolism               |
| 0.193361341 | Metabolism               |
| 0.008063136 | TME                      |
| 2.39E-07    | TME                      |
| 0.000108215 | TME                      |

|             |                          |
|-------------|--------------------------|
| 0.001278557 | TME                      |
| 0.00023979  | TME                      |
| 0.000565786 | TME                      |
| 0.000195718 | TME                      |
| 9.06E-06    | TME                      |
| 4.86E-06    | TME                      |
| 0.001430133 | Proliferation/Metastasis |
| 6.28E-07    | Proliferation/Metastasis |
| 0.030986756 | Metabolism               |
| 0.205973908 | Metabolism               |
| 0.00434356  | TME                      |
| 0.874372983 | Metabolism               |
| 0.488677889 | Metabolism               |
| 0.000109326 | TME                      |
| 0.177064528 | Proliferation/Metastasis |
| 0.048809777 | Proliferation/Metastasis |
| 0.00261305  | TME                      |
| 0.002754586 | Metabolism               |
| 0.002202732 | Metabolism               |
| 0.005251629 | Proliferation/Metastasis |
| 0.007442649 | Proliferation/Metastasis |
| 0.00982     | TME                      |
| 0.001493377 | TME                      |
| 0.000703718 | TME                      |
| 0.000176475 | TME                      |
| 0.12255669  | Proliferation/Metastasis |
| 3.98E-09    | TME                      |
| 0.000122736 | TME                      |
| 0.182143337 | Metabolism               |
| 0.015856044 | TME                      |
| 0.002783472 | TME                      |
| 0.000186731 | TME                      |
| 6.67E-06    | TME                      |
| 0.762728036 | Metabolism               |
| 0.039197426 | Metabolism               |
| 0.000191658 | Metabolism               |
| 1.57E-06    | TME                      |
| 0.011777301 | Metabolism               |
| 0.001091088 | TME                      |
| 0.000434196 | TME                      |
| 0.000488066 | TME                      |
| 0.005284647 | TME                      |
| 0.901244626 | TME                      |

|             |                          |
|-------------|--------------------------|
| 0.18146551  | Metabolism               |
| 9.99E-05    | Proliferation/Metastasis |
| 0.010739146 | Metabolism               |
| 0.773873692 | Proliferation/Metastasis |
| 8.96E-05    | Metabolism               |
| 0.540864254 | Metabolism               |
| 0.030425966 | Metabolism               |
| 0.110569129 | Metabolism               |
| 0.055159856 | Metabolism               |
| 0.065265686 | Metabolism               |
| 0.220851265 | Metabolism               |
| 0.002128    | Metabolism               |
| 0.000917934 | Metabolism               |
| 1.21E-06    | Metabolism               |
| 9.51E-08    | Metabolism               |
| 0.185262908 | Metabolism               |
| 0.106930979 | Metabolism               |
| 0.016500424 | Metabolism               |
| 0.00036121  | TME                      |
| 0.035125308 | Proliferation/Metastasis |
| 0.011285181 | Metabolism               |
| 0.035895948 | Proliferation/Metastasis |
| 9.53E-05    | TME                      |
| 4.10E-05    | Proliferation/Metastasis |
| 0.001235552 | Proliferation/Metastasis |
| 0.090881529 | TME                      |
| 5.96E-06    | TME                      |
| 0.243900521 | Metabolism               |
| 0.051440314 | Metabolism               |
| 0.208420636 | Proliferation/Metastasis |
| 0.018947028 | Proliferation/Metastasis |
| 5.51E-05    | Proliferation/Metastasis |
| 0.945253816 | Metabolism               |
| 0.40045256  | Metabolism               |
| 3.65E-07    | Metabolism               |
| 0.000127492 | Proliferation/Metastasis |
| 7.43E-05    | TME                      |
| 1.01E-06    | TME                      |
| 0.013312193 | Metabolism               |
| 0.041192475 | Proliferation/Metastasis |
| 0.729594398 | Metabolism               |
| 0.000184532 | TME                      |
| 0.014088417 | TME                      |

|             |                          |
|-------------|--------------------------|
| 1.45E-07    | TME                      |
| 0.000200186 | TME                      |
| 0.000291306 | Metabolism               |
| 0.225432466 | TME                      |
| 4.20E-06    | Proliferation/Metastasis |
| 4.52E-06    | TME                      |
| 0.20392386  | Proliferation/Metastasis |
| 0.099232351 | Proliferation/Metastasis |
| 0.22744162  | Metabolism               |
| 0.620246291 | Proliferation/Metastasis |
| 0.000133916 | TME                      |
| 0.017238363 | Metabolism               |
| 0.956539082 | TME                      |
| 1.71E-09    | TME                      |
| 2.81E-05    | TME                      |
| 1.98E-05    | TME                      |
| 0.003957913 | TME                      |
| 0.001313289 | TME                      |
| 0.807573624 | Metabolism               |
| 1.19E-06    | TME                      |
| 0.020171872 | Metabolism               |
| 0.376235893 | Metabolism               |
| 0.010686064 | Proliferation/Metastasis |
| 0.611237681 | Proliferation/Metastasis |
| 0.989612082 | Metabolism               |
| 0.015495822 | Metabolism               |
| 0.107366868 | Metabolism               |
| 4.54E-05    | Metabolism               |
| 4.66E-06    | Proliferation/Metastasis |
| 0.189485225 | Proliferation/Metastasis |
| 0.019673753 | Metabolism               |
| 0.075720619 | Metabolism               |
| 0.017245101 | Metabolism               |
| 8.95E-08    | TME                      |
| 0.003201231 | Metabolism               |
| 0.20175078  | Metabolism               |
| 0.855908584 | Metabolism               |
| 0.237949289 | Metabolism               |
| 0.040684259 | Proliferation/Metastasis |
| 0.040501034 | Metabolism               |
| 0.000588947 | Metabolism               |
| 0.730421978 | Metabolism               |
| 0.000718828 | Metabolism               |

|             |                          |
|-------------|--------------------------|
| 0.192708983 | Metabolism               |
| 0.125525902 | Metabolism               |
| 0.060141353 | Proliferation/Metastasis |
| 0.003168618 | Metabolism               |
| 0.000844045 | Metabolism               |
| 0.49197703  | Proliferation/Metastasis |
| 0.104362754 | Metabolism               |
| 0.020400786 | Metabolism               |
| 0.00170017  | Metabolism               |
| 0.677483679 | Metabolism               |
| 0.551114227 | Metabolism               |
| 0.001416174 | Metabolism               |
| 3.16E-05    | Metabolism               |
| 0.996237093 | Metabolism               |
| 9.65E-07    | TME                      |
| 1.64E-05    | TME                      |
| 0.000103818 | TME                      |
| 7.42E-06    | TME                      |
| 3.30E-07    | TME                      |
| 0.402699547 | Metabolism               |
| 0.202577743 | Metabolism               |
| 0.695527923 | Proliferation/Metastasis |
| 0.010280394 | Metabolism               |
| 0.015847046 | Proliferation/Metastasis |
| 4.14E-05    | Metabolism               |
| 0.305239251 | TME                      |
| 6.82E-05    | Metabolism               |
| 0.004838384 | Metabolism               |
| 0.004987719 | Metabolism               |
| 0.325336677 | Metabolism               |
| 2.59E-06    | TME                      |
| 2.30E-05    | TME                      |
| 0.094935999 | Proliferation/Metastasis |
| 0.177451948 | Metabolism               |
| 0.038961885 | Proliferation/Metastasis |
| 0.093770362 | Proliferation/Metastasis |
| 0.723035501 | TME                      |
| 0.041925502 | TME                      |
| 0.006272067 | TME                      |
| 0.001113775 | TME                      |
| 0.830932414 | Metabolism               |
| 0.684749213 | Proliferation/Metastasis |
| 0.249947132 | Metabolism               |

|             |                          |
|-------------|--------------------------|
| 0.055733439 | Metabolism               |
| 0.053149946 | Proliferation/Metastasis |
| 4.75E-08    | Proliferation/Metastasis |
| 0.160128874 | Metabolism               |
| 0.660493739 | Metabolism               |
| 0.994931708 | Metabolism               |
| 0.430425455 | Metabolism               |
| 6.68E-05    | TME                      |
| 2.16E-05    | TME                      |
| 0.012393716 | TME                      |
| 0.008810683 | TME                      |
| 0.068838093 | TME                      |
| 0.944116587 | Metabolism               |
| 0.008944035 | Metabolism               |
| 0.042892566 | Metabolism               |
| 0.00121608  | Metabolism               |
| 0.094444443 | Metabolism               |
| 9.38E-07    | TME                      |
| 0.003165706 | TME                      |
| 0.002761458 | TME                      |
| 0.002192506 | TME                      |
| 0.001647277 | TME                      |
| 0.006374998 | TME                      |
| 0.000749084 | TME                      |
| 0.01002305  | TME                      |
| 0.003540298 | TME                      |
| 0.000610588 | Proliferation/Metastasis |
| 0.226664071 | Proliferation/Metastasis |
| 0.034780351 | Metabolism               |
| 0.22355798  | Metabolism               |
| 0.460305583 | TME                      |
| 0.536299665 | Metabolism               |
| 0.66109784  | Metabolism               |
| 1.03E-06    | TME                      |
| 3.56E-07    | Proliferation/Metastasis |
| 1.64E-08    | Proliferation/Metastasis |
| 0.1168362   | TME                      |
| 0.132667222 | Metabolism               |
| 0.017005458 | Metabolism               |
| 3.67E-05    | Proliferation/Metastasis |
| 5.11E-10    | Proliferation/Metastasis |
| 0.00048179  | TME                      |
| 1.79E-05    | TME                      |

|             |                          |
|-------------|--------------------------|
| 0.007132801 | TME                      |
| 8.97E-08    | TME                      |
| 0.194196958 | Proliferation/Metastasis |
| 8.45E-05    | TME                      |
| 0.00299184  | TME                      |
| 0.483548684 | Metabolism               |
| 0.021708706 | TME                      |
| 0.001030022 | TME                      |
| 0.044904397 | TME                      |
| 0.123336841 | TME                      |
| 0.040879777 | Metabolism               |
| 0.270421109 | Metabolism               |
| 0.290981834 | Metabolism               |
| 3.73E-08    | TME                      |
| 5.96E-05    | Metabolism               |
| 0.004918206 | TME                      |
| 1.50E-06    | TME                      |
| 1.36E-05    | TME                      |
| 0.519697489 | TME                      |
| 0.254480567 | TME                      |
| 0.461349851 | Metabolism               |
| 0.010801079 | Proliferation/Metastasis |
| 0.186435004 | Metabolism               |
| 0.175584621 | Proliferation/Metastasis |
| 0.77224041  | Metabolism               |
| 0.062320582 | Metabolism               |
| 0.113089325 | Metabolism               |
| 0.000882376 | Metabolism               |
| 0.878587911 | Metabolism               |
| 1.19E-05    | Metabolism               |
| 2.95E-08    | Metabolism               |
| 1.40E-06    | Metabolism               |
| 1.45E-05    | Metabolism               |
| 6.81E-05    | Metabolism               |
| 5.85E-07    | Metabolism               |
| 0.81662202  | Metabolism               |
| 0.359185904 | Metabolism               |
| 4.70E-05    | Metabolism               |
| 3.17E-05    | TME                      |
| 0.001475518 | Proliferation/Metastasis |
| 0.382104303 | Metabolism               |
| 0.000582995 | Proliferation/Metastasis |
| 0.005363067 | TME                      |



|             |                          |
|-------------|--------------------------|
| 3.96E-07    | Proliferation/Metastasis |
| 5.41E-07    | Proliferation/Metastasis |
| 0.000467912 | TME                      |
| 0.00019937  | TME                      |
| 0.002733921 | Metabolism               |
| 1.35E-06    | Metabolism               |
| 0.42810636  | Proliferation/Metastasis |
| 0.308437648 | Proliferation/Metastasis |
| 1.14E-07    | Proliferation/Metastasis |
| 0.735852863 | Metabolism               |
| 0.020795022 | Metabolism               |
| 0.278505853 | Metabolism               |
| 2.76E-05    | Proliferation/Metastasis |
| 0.000855105 | TME                      |
| 0.000143254 | TME                      |
| 0.671573642 | Metabolism               |
| 1.26E-07    | Proliferation/Metastasis |
| 9.20E-07    | Metabolism               |
| 0.001774196 | TME                      |
| 0.002372638 | TME                      |
| 0.000128995 | TME                      |
| 3.59E-06    | TME                      |
| 0.068340588 | Metabolism               |
| 0.008924517 | TME                      |
| 0.554595013 | Proliferation/Metastasis |
| 0.000597989 | TME                      |
| 0.034046982 | Proliferation/Metastasis |
| 0.457914226 | Proliferation/Metastasis |
| 1.47E-08    | Metabolism               |
| 0.002350819 | Proliferation/Metastasis |
| 7.96E-06    | TME                      |
| 0.915843652 | Metabolism               |
| 0.010254163 | TME                      |
| 7.70E-05    | TME                      |
| 2.49E-05    | TME                      |
| 0.000219644 | TME                      |
| 0.630436496 | TME                      |
| 0.000340541 | TME                      |
| 0.002778268 | Metabolism               |
| 0.000139625 | TME                      |
| 0.803404457 | Metabolism               |
| 0.167679692 | Metabolism               |
| 4.76E-09    | Proliferation/Metastasis |

|             |                          |
|-------------|--------------------------|
| 0.028973402 | Proliferation/Metastasis |
| 0.050942928 | Metabolism               |
| 2.64E-05    | Metabolism               |
| 0.028639866 | Metabolism               |
| 0.009869156 | Metabolism               |
| 0.013441842 | Proliferation/Metastasis |
| 0.090344109 | Proliferation/Metastasis |
| 0.01067937  | Metabolism               |
| 0.922167428 | Metabolism               |
| 0.027779997 | Metabolism               |
| 7.60E-07    | TME                      |
| 0.692829409 | Metabolism               |
| 0.195050071 | Metabolism               |
| 0.963514513 | Metabolism               |
| 0.000256659 | Metabolism               |
| 0.009551909 | Proliferation/Metastasis |
| 0.079604725 | Metabolism               |
| 0.504168464 | Metabolism               |
| 0.539379776 | Metabolism               |
| 0.013035769 | Metabolism               |
| 0.000288823 | Metabolism               |
| 0.007198774 | Metabolism               |
| 0.313567362 | Proliferation/Metastasis |
| 0.181357973 | Metabolism               |
| 0.659568326 | Metabolism               |
| 0.056992283 | Proliferation/Metastasis |
| 0.129483169 | Metabolism               |
| 0.002224565 | Metabolism               |
| 0.005134634 | Metabolism               |
| 0.000276951 | Metabolism               |
| 0.007515082 | Metabolism               |
| 0.30029154  | Metabolism               |
| 0.908133462 | Metabolism               |
| 0.000606789 | Metabolism               |
| 7.61E-05    | TME                      |
| 0.000345098 | TME                      |
| 2.00E-06    | TME                      |
| 0.001272811 | TME                      |
| 0.002900223 | TME                      |
| 0.569449401 | Metabolism               |
| 0.007447241 | Metabolism               |
| 1.75E-07    | Proliferation/Metastasis |
| 0.000844413 | Metabolism               |

|             |                          |
|-------------|--------------------------|
| 1.67E-05    | Proliferation/Metastasis |
| 0.986063393 | Metabolism               |
| 0.001851594 | TME                      |
| 0.234485214 | Metabolism               |
| 0.145076862 | Metabolism               |
| 0.336583353 | Metabolism               |
| 0.002652129 | Metabolism               |
| 4.85E-06    | TME                      |
| 1.59E-05    | TME                      |
| 6.49E-06    | Proliferation/Metastasis |
| 0.023845254 | Metabolism               |
| 0.697740219 | Proliferation/Metastasis |
| 0.822631435 | Proliferation/Metastasis |
| 0.05154565  | TME                      |
| 0.197308213 | TME                      |
| 0.033249732 | TME                      |
| 0.052132101 | TME                      |
| 0.000524489 | Metabolism               |
| 0.000257832 | Proliferation/Metastasis |
| 2.73E-09    | Metabolism               |
| 0.00053818  | Metabolism               |
| 0.015449094 | Proliferation/Metastasis |
| 0.139900634 | Proliferation/Metastasis |
| 0.000369508 | Metabolism               |
| 0.072566433 | Metabolism               |
| 0.053192933 | Metabolism               |
| 0.59304443  | Metabolism               |
| 0.00955658  | TME                      |
| 0.011726021 | TME                      |
| 0.162033896 | TME                      |
| 0.267553422 | TME                      |
| 0.149087312 | TME                      |
| 0.000102119 | Metabolism               |
| 0.074878472 | Metabolism               |
| 0.722776971 | Metabolism               |
| 0.000561224 | Metabolism               |
| 0.051781383 | Metabolism               |
| 0.444670383 | TME                      |
| 0.068531826 | TME                      |
| 0.131947423 | TME                      |
| 0.079529463 | TME                      |
| 0.681414445 | TME                      |
| 0.070251606 | TME                      |

|             |                          |
|-------------|--------------------------|
| 0.303805237 | TME                      |
| 0.155375138 | TME                      |
| 0.022495494 | TME                      |
| 1.77E-15    | Proliferation/Metastasis |
| 0.005931548 | Proliferation/Metastasis |
| 0.075602405 | Metabolism               |
| 0.152368003 | Metabolism               |
| 0.168536673 | TME                      |
| 5.80E-06    | Metabolism               |
| 0.052459728 | Metabolism               |
| 0.387973253 | TME                      |
| 2.36E-07    | Proliferation/Metastasis |
| 2.14E-13    | Proliferation/Metastasis |
| 0.331573995 | TME                      |
| 0.152810863 | Metabolism               |
| 0.002877576 | Metabolism               |
| 2.96E-14    | Proliferation/Metastasis |
| 0.333705192 | Proliferation/Metastasis |
| 0.054292265 | TME                      |
| 0.122716487 | TME                      |
| 0.15201077  | TME                      |
| 0.140545173 | TME                      |
| 0.001995173 | Proliferation/Metastasis |
| 0.000515925 | TME                      |
| 0.069242035 | TME                      |
| 1.45E-07    | Metabolism               |
| 0.287693545 | TME                      |
| 0.358267813 | TME                      |
| 0.69768754  | TME                      |
| 0.583516657 | TME                      |
| 6.03E-05    | Metabolism               |
| 3.59E-05    | Metabolism               |
| 0.994342857 | Metabolism               |
| 0.037374442 | TME                      |
| 0.790639505 | Metabolism               |
| 0.139710479 | TME                      |
| 0.706740264 | TME                      |
| 0.821441855 | TME                      |
| 0.026152073 | TME                      |
| 0.617128633 | TME                      |
| 0.424592214 | Metabolism               |
| 9.93E-13    | Proliferation/Metastasis |
| 0.018028086 | Metabolism               |

|             |                          |
|-------------|--------------------------|
| 0.013463159 | Proliferation/Metastasis |
| 0.047302781 | Metabolism               |
| 0.067001147 | Metabolism               |
| 1.77E-08    | Metabolism               |
| 0.004083916 | Metabolism               |
| 0.144103459 | Metabolism               |
| 0.033358515 | Metabolism               |
| 0.013090681 | Metabolism               |
| 0.003305692 | Metabolism               |
| 0.646860328 | Metabolism               |
| 0.089469778 | Metabolism               |
| 0.295711709 | Metabolism               |
| 0.137355088 | Metabolism               |
| 0.344895291 | Metabolism               |
| 0.191592184 | Metabolism               |
| 0.461772744 | TME                      |
| 0.366949867 | Proliferation/Metastasis |
| 6.35E-10    | Metabolism               |
| 0.110546198 | Proliferation/Metastasis |
| 0.631708544 | TME                      |
| 0.568404091 | Proliferation/Metastasis |
| 0.732835663 | Proliferation/Metastasis |
| 0.388497593 | TME                      |
| 0.770695281 | TME                      |
| 0.000303842 | Metabolism               |
| 0.019744853 | Metabolism               |
| 2.52E-09    | Proliferation/Metastasis |
| 6.77E-10    | Proliferation/Metastasis |
| 0.65582361  | Proliferation/Metastasis |
| 9.34E-09    | Metabolism               |
| 0.597245027 | Metabolism               |
| 0.680179787 | Metabolism               |
| 0.590574254 | Proliferation/Metastasis |
| 0.275403728 | TME                      |
| 0.94594632  | TME                      |
| 0.262930653 | Metabolism               |
| 0.113988187 | Proliferation/Metastasis |
| 0.026619246 | Metabolism               |
| 0.276792597 | TME                      |
| 0.075534862 | TME                      |
| 6.56E-05    | TME                      |
| 0.199480442 | TME                      |
| 0.592400385 | Metabolism               |

|             |                          |
|-------------|--------------------------|
| 0.772651775 | TME                      |
| 0.329611467 | Proliferation/Metastasis |
| 0.29774361  | TME                      |
| 0.801101018 | Proliferation/Metastasis |
| 1.37E-07    | Proliferation/Metastasis |
| 0.994082651 | Metabolism               |
| 2.29E-17    | Proliferation/Metastasis |
| 0.174093585 | TME                      |
| 5.11E-11    | Metabolism               |
| 0.478366356 | TME                      |
| 0.580541376 | TME                      |
| 0.033703374 | TME                      |
| 0.550029603 | TME                      |
| 0.000109452 | TME                      |
| 0.560399257 | TME                      |
| 0.115673644 | Metabolism               |
| 0.691241032 | TME                      |
| 0.01546159  | Metabolism               |
| 1.11E-05    | Metabolism               |
| 0.30468495  | Proliferation/Metastasis |
| 0.98755625  | Proliferation/Metastasis |
| 4.27E-08    | Metabolism               |
| 0.776774144 | Metabolism               |
| 0.05750258  | Metabolism               |
| 0.076714789 | Metabolism               |
| 0.59173668  | Proliferation/Metastasis |
| 9.11E-08    | Proliferation/Metastasis |
| 0.137224954 | Metabolism               |
| 0.018427287 | Metabolism               |
| 0.00894292  | Metabolism               |
| 0.046446448 | TME                      |
| 0.001696535 | Metabolism               |
| 0.001127186 | Metabolism               |
| 0.000357645 | Metabolism               |
| 0.467569461 | Metabolism               |
| 0.170629508 | Proliferation/Metastasis |
| 0.09372583  | Metabolism               |
| 1.77E-09    | Metabolism               |
| 0.002119186 | Metabolism               |
| 3.61E-14    | Metabolism               |
| 7.66E-12    | Metabolism               |
| 0.536150291 | Metabolism               |
| 0.000214576 | Proliferation/Metastasis |

|             |                          |
|-------------|--------------------------|
| 0.02059251  | Metabolism               |
| 0.015064552 | Metabolism               |
| 0.124469569 | Proliferation/Metastasis |
| 0.007369224 | Metabolism               |
| 0.005876362 | Metabolism               |
| 0.161032576 | Metabolism               |
| 0.001765334 | Metabolism               |
| 1.95E-05    | Metabolism               |
| 0.000891994 | Metabolism               |
| 0.009743819 | Metabolism               |
| 0.055242069 | Metabolism               |
| 0.154598169 | TME                      |
| 0.314379216 | TME                      |
| 0.647377622 | TME                      |
| 0.617300615 | TME                      |
| 0.933377089 | TME                      |
| 0.478275982 | Metabolism               |
| 0.000304343 | Metabolism               |
| 0.012822092 | Proliferation/Metastasis |
| 0.017971975 | Metabolism               |
| 0.467869103 | Proliferation/Metastasis |
| 0.003773081 | Metabolism               |
| 0.578136631 | TME                      |
| 0.001647745 | Metabolism               |
| 0.428860199 | Metabolism               |
| 0.822490343 | Metabolism               |
| 0.001085065 | Metabolism               |
| 0.363640436 | TME                      |
| 0.351304616 | TME                      |
| 0.580971034 | Proliferation/Metastasis |
| 4.68E-07    | Metabolism               |
| 0.003531993 | Proliferation/Metastasis |
| 0.010257328 | Proliferation/Metastasis |
| 0.111803524 | TME                      |
| 0.000868979 | TME                      |
| 1.20E-05    | TME                      |
| 0.019192155 | TME                      |
| 0.055855647 | Metabolism               |
| 0.51357711  | Proliferation/Metastasis |
| 0.070663956 | Metabolism               |
| 0.015420145 | Metabolism               |
| 0.000246414 | Proliferation/Metastasis |
| 0.062433205 | Proliferation/Metastasis |

|             |                          |
|-------------|--------------------------|
| 0.012763765 | Metabolism               |
| 0.001641698 | Metabolism               |
| 0.025073674 | Metabolism               |
| 0.008298629 | Metabolism               |
| 0.044172549 | TME                      |
| 0.00022337  | TME                      |
| 8.29E-06    | TME                      |
| 0.000571179 | TME                      |
| 0.044705628 | TME                      |
| 0.000353003 | Metabolism               |
| 0.202335981 | Metabolism               |
| 0.8093764   | Metabolism               |
| 0.105893898 | Metabolism               |
| 0.000482178 | Metabolism               |
| 0.001193332 | TME                      |
| 0.004112114 | TME                      |
| 4.87E-05    | TME                      |
| 0.009293847 | TME                      |
| 0.000141111 | TME                      |
| 0.000125831 | TME                      |
| 0.000175127 | TME                      |
| 0.143316042 | TME                      |
| 0.130133203 | TME                      |
| 0.072445647 | Proliferation/Metastasis |
| 0.067587896 | Proliferation/Metastasis |
| 0.797247402 | Metabolism               |
| 0.02327783  | Metabolism               |
| 0.125646873 | TME                      |
| 0.1435858   | Metabolism               |
| 0.7013668   | Metabolism               |
| 0.000864504 | TME                      |
| 0.000174834 | Proliferation/Metastasis |
| 0.038149075 | Proliferation/Metastasis |
| 0.702167756 | TME                      |
| 0.006542959 | Metabolism               |
| 0.996218001 | Metabolism               |
| 0.015593404 | Proliferation/Metastasis |
| 0.003419275 | Proliferation/Metastasis |
| 2.92E-05    | TME                      |
| 8.05E-06    | TME                      |
| 5.91E-06    | TME                      |
| 0.000360628 | TME                      |
| 0.013003189 | Proliferation/Metastasis |



|             |                          |
|-------------|--------------------------|
| 0.105408064 | TME                      |
| 0.000208233 | TME                      |
| 0.012048112 | Metabolism               |
| 5.51E-05    | TME                      |
| 0.000264939 | TME                      |
| 0.008175481 | TME                      |
| 0.042231959 | TME                      |
| 0.04911368  | Metabolism               |
| 0.168786503 | Metabolism               |
| 0.22287698  | Metabolism               |
| 0.000107894 | TME                      |
| 0.197821788 | Metabolism               |
| 1.33E-06    | TME                      |
| 0.00959126  | TME                      |
| 0.000148591 | TME                      |
| 0.662728478 | TME                      |
| 0.717178904 | TME                      |
| 0.010402839 | Metabolism               |
| 0.228209167 | Proliferation/Metastasis |
| 0.016878003 | Metabolism               |
| 0.004884458 | Proliferation/Metastasis |
| 0.59007283  | Metabolism               |
| 0.019152795 | Metabolism               |
| 0.633577517 | Metabolism               |
| 0.459385517 | Metabolism               |
| 0.001478527 | Metabolism               |
| 0.170634142 | Metabolism               |
| 0.209714594 | Metabolism               |
| 0.067102475 | Metabolism               |
| 0.159498897 | Metabolism               |
| 0.000126338 | Metabolism               |
| 0.000174162 | Metabolism               |
| 0.575040265 | Metabolism               |
| 0.005995942 | Metabolism               |
| 0.993807846 | Metabolism               |
| 0.000346253 | TME                      |
| 0.011071068 | Proliferation/Metastasis |
| 0.000286724 | Metabolism               |
| 0.001434304 | Proliferation/Metastasis |
| 0.066947568 | TME                      |
| 0.000464821 | Proliferation/Metastasis |
| 0.00061124  | Proliferation/Metastasis |
| 9.53E-05    | TME                      |

|             |                          |
|-------------|--------------------------|
| 0.057213178 | TME                      |
| 2.05E-05    | Metabolism               |
| 1.28E-05    | Metabolism               |
| 0.001415161 | Proliferation/Metastasis |
| 0.49611061  | Proliferation/Metastasis |
| 5.20E-08    | Proliferation/Metastasis |
| 0.22078441  | Metabolism               |
| 0.005749503 | Metabolism               |
| 0.260429447 | Metabolism               |
| 0.000290848 | Proliferation/Metastasis |
| 7.45E-05    | TME                      |
| 0.000151312 | TME                      |
| 0.001244312 | Metabolism               |
| 0.003400097 | Proliferation/Metastasis |
| 1.47E-05    | Metabolism               |
| 0.003524978 | TME                      |
| 2.93E-05    | TME                      |
| 0.344554999 | TME                      |
| 9.88E-07    | TME                      |
| 0.069866992 | Metabolism               |
| 1.02E-06    | TME                      |
| 0.219650643 | Proliferation/Metastasis |
| 0.000376782 | TME                      |
| 0.304378055 | Proliferation/Metastasis |
| 0.004525509 | Proliferation/Metastasis |
| 4.49E-07    | Metabolism               |
| 0.052749797 | Proliferation/Metastasis |
| 1.50E-05    | TME                      |
| 0.487036034 | Metabolism               |
| 0.002434139 | TME                      |
| 2.31E-06    | TME                      |
| 0.000303702 | TME                      |
| 0.000305674 | TME                      |
| 0.608208096 | TME                      |
| 3.84E-05    | TME                      |
| 1.82E-05    | Metabolism               |
| 0.000364306 | TME                      |
| 0.080828926 | Metabolism               |
| 0.002933045 | Metabolism               |
| 0.000109884 | Proliferation/Metastasis |
| 0.364261243 | Proliferation/Metastasis |
| 0.146116606 | Metabolism               |
| 0.428313351 | Metabolism               |

|             |                          |
|-------------|--------------------------|
| 8.34E-05    | Metabolism               |
| 0.343635729 | Metabolism               |
| 0.006553133 | Proliferation/Metastasis |
| 0.926338675 | Proliferation/Metastasis |
| 0.531098957 | Metabolism               |
| 0.145147189 | Metabolism               |
| 8.74E-05    | Metabolism               |
| 0.0524081   | TME                      |
| 0.00014177  | Metabolism               |
| 0.278461323 | Metabolism               |
| 7.28E-05    | Metabolism               |
| 2.76E-07    | Metabolism               |
| 0.000751483 | Proliferation/Metastasis |
| 0.338203074 | Metabolism               |
| 1.28E-05    | Metabolism               |
| 0.182164018 | Metabolism               |
| 0.280001571 | Metabolism               |
| 0.000957573 | Metabolism               |
| 0.044204407 | Metabolism               |
| 0.070738268 | Proliferation/Metastasis |
| 0.099098393 | Metabolism               |
| 0.423843182 | Metabolism               |
| 1.60E-11    | Proliferation/Metastasis |
| 0.032224393 | Metabolism               |
| 8.64E-06    | Metabolism               |
| 3.27E-06    | Metabolism               |
| 0.000800749 | Metabolism               |
| 0.051469196 | Metabolism               |
| 0.017557329 | Metabolism               |
| 0.498071988 | Metabolism               |
| 0.048070987 | Metabolism               |
| 8.64E-05    | TME                      |
| 0.000496961 | TME                      |
| 0.000591096 | TME                      |
| 0.001491325 | TME                      |
| 0.002754821 | TME                      |
| 0.000276651 | Metabolism               |
| 0.687475943 | Metabolism               |
| 0.004106898 | Proliferation/Metastasis |
| 0.079646506 | Metabolism               |
| 0.003407584 | Proliferation/Metastasis |
| 0.000232892 | Metabolism               |
| 0.586055339 | TME                      |

|             |                          |
|-------------|--------------------------|
| 0.000637804 | Metabolism               |
| 0.13366439  | Metabolism               |
| 0.052634207 | Metabolism               |
| 0.208907801 | Metabolism               |
| 0.114665756 | TME                      |
| 0.027655442 | TME                      |
| 0.04675217  | Proliferation/Metastasis |
| 0.000158309 | Metabolism               |
| 0.554080883 | Proliferation/Metastasis |
| 0.401092403 | Proliferation/Metastasis |
| 0.313025113 | TME                      |
| 8.86E-17    | TME                      |
| 1.34E-12    | TME                      |
| 6.97E-10    | TME                      |
| 0.182807697 | Metabolism               |
| 2.88E-10    | Proliferation/Metastasis |
| 0.015298433 | Metabolism               |
| 9.57E-19    | Metabolism               |
| 1.46E-13    | Proliferation/Metastasis |
| 3.70E-08    | Proliferation/Metastasis |
| 1.33E-10    | Metabolism               |
| 6.04E-08    | Metabolism               |
| 0.022302826 | Metabolism               |
| 0.216243828 | Metabolism               |
| 3.48E-06    | TME                      |
| 1.74E-13    | TME                      |
| 2.27E-13    | TME                      |
| 0.001918607 | TME                      |
| 1.40E-30    | TME                      |
| 0.003038107 | Metabolism               |
| 0.004624425 | Metabolism               |
| 0.011413487 | Metabolism               |
| 0.467511002 | Metabolism               |
| 0.510840565 | Metabolism               |
| 1.17E-06    | TME                      |
| 0.002181121 | TME                      |
| 2.78E-11    | TME                      |
| 9.60E-07    | TME                      |
| 2.42E-12    | TME                      |
| 9.77E-10    | TME                      |
| 1.75E-11    | TME                      |
| 4.45E-09    | TME                      |
| 5.90E-07    | TME                      |

|             |                          |
|-------------|--------------------------|
| 0.000118359 | Proliferation/Metastasis |
| 1.40E-07    | Proliferation/Metastasis |
| 0.026506749 | Metabolism               |
| 3.75E-05    | Metabolism               |
| 0.008148214 | TME                      |
| 0.250779745 | Metabolism               |
| 0.015376823 | Metabolism               |
| 9.38E-12    | TME                      |
| 0.003489332 | Proliferation/Metastasis |
| 0.115786497 | Proliferation/Metastasis |
| 0.000730814 | TME                      |
| 0.000134324 | Metabolism               |
| 2.29E-07    | Metabolism               |
| 0.000126221 | Proliferation/Metastasis |
| 7.60E-05    | Proliferation/Metastasis |
| 7.30E-08    | TME                      |
| 6.04E-11    | TME                      |
| 3.06E-10    | TME                      |
| 5.79E-09    | TME                      |
| 0.048817991 | Proliferation/Metastasis |
| 0.003601789 | TME                      |
| 1.81E-13    | TME                      |
| 0.132385324 | Metabolism               |
| 3.38E-12    | TME                      |
| 3.31E-14    | TME                      |
| 1.49E-08    | TME                      |
| 0.002326463 | TME                      |
| 0.774790439 | Metabolism               |
| 0.085780661 | Metabolism               |
| 9.12E-09    | Metabolism               |
| 5.16E-07    | TME                      |
| 1.24E-07    | Metabolism               |
| 1.73E-05    | TME                      |
| 0.000603171 | TME                      |
| 2.65E-11    | TME                      |
| 0.001998689 | TME                      |
| 0.059736384 | TME                      |
| 5.31E-12    | Metabolism               |
| 1.57E-09    | Proliferation/Metastasis |
| 9.80E-15    | Metabolism               |
| 0.138697716 | Proliferation/Metastasis |
| 1.83E-13    | Metabolism               |
| 0.31828564  | Metabolism               |

|             |                          |
|-------------|--------------------------|
| 0.007103405 | Metabolism               |
| 0.001222138 | Metabolism               |
| 1.88E-09    | Metabolism               |
| 4.34E-06    | Metabolism               |
| 0.27241869  | Metabolism               |
| 1.21E-08    | Metabolism               |
| 2.06E-12    | Metabolism               |
| 1.54E-14    | Metabolism               |
| 9.08E-11    | Metabolism               |
| 0.859748751 | Metabolism               |
| 9.29E-09    | Metabolism               |
| 0.038747335 | Metabolism               |
| 2.87E-14    | TME                      |
| 0.019000175 | Proliferation/Metastasis |
| 8.56E-07    | Metabolism               |
| 2.14E-13    | Proliferation/Metastasis |
| 5.18E-08    | TME                      |
| 7.64E-17    | Proliferation/Metastasis |
| 9.55E-16    | Proliferation/Metastasis |
| 1.97E-12    | TME                      |
| 1.14E-12    | TME                      |
| 0.002614532 | Metabolism               |
| 0.270250495 | Metabolism               |
| 0.025086662 | Proliferation/Metastasis |
| 0.258905715 | Proliferation/Metastasis |
| 7.48E-14    | Proliferation/Metastasis |
| 0.166343089 | Metabolism               |
| 0.029276862 | Metabolism               |
| 6.85E-11    | Metabolism               |
| 4.11E-14    | Proliferation/Metastasis |
| 2.15E-14    | TME                      |
| 3.15E-15    | TME                      |
| 0.77830091  | Metabolism               |
| 0.645643701 | Proliferation/Metastasis |
| 0.773204855 | Metabolism               |
| 2.38E-09    | TME                      |
| 1.26E-05    | TME                      |
| 4.30E-12    | TME                      |
| 2.72E-11    | TME                      |
| 7.07E-06    | Metabolism               |
| 4.01E-13    | TME                      |
| 1.05E-11    | Proliferation/Metastasis |
| 9.28E-20    | TME                      |

|             |                          |
|-------------|--------------------------|
| 0.000142207 | Proliferation/Metastasis |
| 4.07E-12    | Proliferation/Metastasis |
| 1.15E-05    | Metabolism               |
| 0.537940313 | Proliferation/Metastasis |
| 3.64E-10    | TME                      |
| 2.37E-08    | Metabolism               |
| 0.036213413 | TME                      |
| 0.000278801 | TME                      |
| 0.729548202 | TME                      |
| 1.99E-12    | TME                      |
| 6.30E-12    | TME                      |
| 5.49E-10    | TME                      |
| 3.89E-10    | Metabolism               |
| 1.20E-15    | TME                      |
| 2.85E-15    | Metabolism               |
| 0.013379517 | Metabolism               |
| 1.15E-11    | Proliferation/Metastasis |
| 0.625486318 | Proliferation/Metastasis |
| 0.094434876 | Metabolism               |
| 2.73E-12    | Metabolism               |
| 0.126884451 | Metabolism               |
| 3.87E-06    | Metabolism               |
| 7.33E-18    | Proliferation/Metastasis |
| 0.124299421 | Proliferation/Metastasis |
| 3.74E-05    | Metabolism               |
| 0.000191295 | Metabolism               |
| 1.93E-09    | Metabolism               |
| 0.001322361 | TME                      |
| 1.10E-12    | Metabolism               |
| 0.048005568 | Metabolism               |
| 3.96E-11    | Metabolism               |
| 0.87847335  | Metabolism               |
| 1.97E-10    | Proliferation/Metastasis |
| 1.82E-05    | Metabolism               |
| 1.43E-09    | Metabolism               |
| 0.835305879 | Metabolism               |
| 0.007790193 | Metabolism               |
| 0.018896632 | Metabolism               |
| 0.125612743 | Metabolism               |
| 0.002599644 | Proliferation/Metastasis |
| 0.065319184 | Metabolism               |
| 9.23E-11    | Metabolism               |
| 0.039186207 | Proliferation/Metastasis |

|             |                          |
|-------------|--------------------------|
| 0.002427175 | Metabolism               |
| 0.152667365 | Metabolism               |
| 0.011827439 | Metabolism               |
| 3.44E-07    | Metabolism               |
| 0.733836275 | Metabolism               |
| 7.94E-05    | Metabolism               |
| 0.989594823 | Metabolism               |
| 0.678067667 | Metabolism               |
| 1.22E-10    | TME                      |
| 3.75E-11    | TME                      |
| 4.55E-14    | TME                      |
| 6.66E-15    | TME                      |
| 7.44E-10    | TME                      |
| 0.001104515 | Metabolism               |
| 0.469617039 | Metabolism               |
| 0.008081321 | Proliferation/Metastasis |
| 3.23E-05    | Metabolism               |
| 1.18E-14    | Proliferation/Metastasis |
| 7.43E-09    | Metabolism               |
| 0.004931214 | TME                      |
| 1.20E-09    | Metabolism               |
| 1.28E-10    | Metabolism               |
| 1.77E-10    | Metabolism               |
| 0.088901073 | Metabolism               |
| 0.000219526 | TME                      |
| 0.375489487 | TME                      |
| 0.829998467 | Proliferation/Metastasis |
| 0.053404763 | Metabolism               |
| 0.016827237 | Proliferation/Metastasis |
| 6.63E-07    | Proliferation/Metastasis |
| 0.004696951 | TME                      |
| 0.637500859 | TME                      |
| 0.642070762 | TME                      |
| 0.154545047 | TME                      |
| 3.64E-05    | Metabolism               |
| 0.400519772 | Proliferation/Metastasis |
| 0.678450684 | Metabolism               |
| 0.018863543 | Metabolism               |
| 0.052587914 | Proliferation/Metastasis |
| 0.043323798 | Proliferation/Metastasis |
| 0.101560807 | Metabolism               |
| 0.038971993 | Metabolism               |
| 2.13E-05    | Metabolism               |



|             |                          |
|-------------|--------------------------|
| 0.509154514 | Metabolism               |
| 0.061458597 | TME                      |
| 0.897246088 | TME                      |
| 0.812923887 | TME                      |
| 0.453085827 | TME                      |
| 0.072232011 | TME                      |
| 0.003879646 | Metabolism               |
| 0.975345002 | Metabolism               |
| 0.767280059 | Metabolism               |
| 0.001019189 | Metabolism               |
| 0.041765245 | Metabolism               |
| 0.002555499 | TME                      |
| 0.040583825 | TME                      |
| 0.834261469 | TME                      |
| 0.018005754 | TME                      |
| 0.623011179 | TME                      |
| 0.728980646 | TME                      |
| 0.996413369 | TME                      |
| 0.461880338 | TME                      |
| 0.619233123 | TME                      |
| 4.71E-06    | Proliferation/Metastasis |
| 0.014647178 | Proliferation/Metastasis |
| 0.851605818 | Metabolism               |
| 0.333748308 | Metabolism               |
| 0.515995677 | TME                      |
| 0.00319116  | Metabolism               |
| 6.88E-10    | Metabolism               |
| 0.646092965 | TME                      |
| 0.002130114 | Proliferation/Metastasis |
| 6.03E-07    | Proliferation/Metastasis |
| 0.103082913 | TME                      |
| 0.031390449 | Metabolism               |
| 0.568955478 | Metabolism               |
| 1.55E-06    | Proliferation/Metastasis |
| 0.001511564 | Proliferation/Metastasis |
| 0.616044419 | TME                      |
| 0.971224513 | TME                      |
| 0.969619982 | TME                      |
| 0.169540438 | TME                      |
| 0.009298537 | Proliferation/Metastasis |
| 0.000373756 | TME                      |
| 0.42984853  | TME                      |
| 0.028148417 | Metabolism               |

|             |                          |
|-------------|--------------------------|
| 0.931346355 | TME                      |
| 0.572782196 | TME                      |
| 0.749993993 | TME                      |
| 0.510469084 | TME                      |
| 0.02107302  | Metabolism               |
| 0.005475725 | Metabolism               |
| 0.346943476 | Metabolism               |
| 0.027507689 | TME                      |
| 0.243503077 | Metabolism               |
| 0.70606271  | TME                      |
| 0.511768513 | TME                      |
| 0.370222995 | TME                      |
| 0.148833097 | TME                      |
| 0.000404658 | TME                      |
| 0.00814053  | Metabolism               |
| 3.09E-07    | Proliferation/Metastasis |
| 0.004715862 | Metabolism               |
| 0.000524822 | Proliferation/Metastasis |
| 0.513613676 | Metabolism               |
| 0.519672421 | Metabolism               |
| 0.332470884 | Metabolism               |
| 0.449605866 | Metabolism               |
| 0.411133582 | Metabolism               |
| 2.11E-07    | Metabolism               |
| 0.000310174 | Metabolism               |
| 0.009708058 | Metabolism               |
| 0.03331887  | Metabolism               |
| 0.561404966 | Metabolism               |
| 0.561764569 | Metabolism               |
| 0.587601596 | Metabolism               |
| 0.464807788 | Metabolism               |
| 0.074340966 | Metabolism               |
| 0.707833015 | TME                      |
| 0.050386344 | Proliferation/Metastasis |
| 0.000443893 | Metabolism               |
| 0.084946635 | Proliferation/Metastasis |
| 0.140022059 | TME                      |
| 0.142992959 | Proliferation/Metastasis |
| 0.272332736 | Proliferation/Metastasis |
| 0.219692097 | TME                      |
| 0.773717029 | TME                      |
| 0.419764781 | Metabolism               |
| 0.047449868 | Metabolism               |

|             |                          |
|-------------|--------------------------|
| 0.000199601 | Proliferation/Metastasis |
| 2.97E-05    | Proliferation/Metastasis |
| 0.717207869 | Proliferation/Metastasis |
| 0.032043651 | Metabolism               |
| 0.030939547 | Metabolism               |
| 0.001668795 | Metabolism               |
| 0.320151032 | Proliferation/Metastasis |
| 0.695207602 | TME                      |
| 0.900643402 | TME                      |
| 0.016070901 | Metabolism               |
| 0.619982416 | Proliferation/Metastasis |
| 0.970751007 | Metabolism               |
| 0.580572741 | TME                      |
| 0.57590797  | TME                      |
| 0.002142366 | TME                      |
| 0.13382195  | TME                      |
| 0.089094222 | Metabolism               |
| 0.127710141 | TME                      |
| 0.001271746 | Proliferation/Metastasis |
| 0.91247946  | TME                      |
| 0.461904949 | Proliferation/Metastasis |
| 0.002856477 | Proliferation/Metastasis |
| 0.331767491 | Metabolism               |
| 0.012608136 | Proliferation/Metastasis |
| 0.929666765 | TME                      |
| 3.12E-06    | Metabolism               |
| 0.166499211 | TME                      |
| 0.317752725 | TME                      |
| 0.020710536 | TME                      |
| 0.974443774 | TME                      |
| 0.046278031 | TME                      |
| 0.566851888 | TME                      |
| 0.116665258 | Metabolism               |
| 0.974563785 | TME                      |
| 0.064608146 | Metabolism               |
| 0.03427931  | Metabolism               |
| 0.88643993  | Proliferation/Metastasis |
| 2.62E-05    | Proliferation/Metastasis |
| 6.58E-07    | Metabolism               |
| 0.138410208 | Metabolism               |
| 6.94E-05    | Metabolism               |
| 0.021900499 | Metabolism               |
| 0.45661076  | Proliferation/Metastasis |

|             |                          |
|-------------|--------------------------|
| 0.000548634 | Proliferation/Metastasis |
| 0.23891472  | Metabolism               |
| 0.219021286 | Metabolism               |
| 0.079900037 | Metabolism               |
| 0.018796991 | TME                      |
| 0.452041082 | Metabolism               |
| 1.31E-05    | Metabolism               |
| 0.310587128 | Metabolism               |
| 0.866850835 | Metabolism               |
| 0.022904654 | Proliferation/Metastasis |
| 0.811698529 | Metabolism               |
| 0.001108143 | Metabolism               |
| 0.002081604 | Metabolism               |
| 0.098917924 | Metabolism               |
| 0.008020643 | Metabolism               |
| 0.005345823 | Metabolism               |
| 6.19E-05    | Proliferation/Metastasis |
| 0.007150105 | Metabolism               |
| 0.558401598 | Metabolism               |
| 0.452393277 | Proliferation/Metastasis |
| 0.261434339 | Metabolism               |
| 0.253534909 | Metabolism               |
| 0.672803435 | Metabolism               |
| 0.468611584 | Metabolism               |
| 0.041894236 | Metabolism               |
| 0.001681618 | Metabolism               |
| 0.523144213 | Metabolism               |
| 0.010487702 | Metabolism               |
| 0.52182022  | TME                      |
| 0.743325016 | TME                      |
| 0.645555197 | TME                      |
| 0.347272563 | TME                      |
| 0.36747436  | TME                      |
| 0.065760782 | Metabolism               |
| 0.091261075 | Metabolism               |
| 0.032452129 | Proliferation/Metastasis |
| 0.004614128 | Metabolism               |
| 0.1029351   | Proliferation/Metastasis |
| 0.087818563 | Metabolism               |
| 0.607428995 | TME                      |
| 0.001214367 | Metabolism               |
| 0.400335174 | Metabolism               |
| 0.050753281 | Metabolism               |

|             |                          |
|-------------|--------------------------|
| 0.022810268 | Metabolism               |
| 0.017085036 | TME                      |
| 0.209777119 | TME                      |
| 0.163200615 | Proliferation/Metastasis |
| 2.76E-05    | Metabolism               |
| 0.351641502 | Proliferation/Metastasis |
| 4.43E-06    | Proliferation/Metastasis |
| 0.069563257 | TME                      |
| 0.000302893 | TME                      |
| 0.000324312 | TME                      |
| 1.70E-05    | TME                      |
| 6.15E-05    | Metabolism               |
| 0.037883962 | Proliferation/Metastasis |
| 1.16E-13    | Metabolism               |
| 3.89E-17    | Metabolism               |
| 0.851845491 | Proliferation/Metastasis |
| 4.84E-13    | Proliferation/Metastasis |
| 8.39E-06    | Metabolism               |
| 1.47E-11    | Metabolism               |
| 0.032406096 | Metabolism               |
| 2.60E-06    | Metabolism               |
| 0.000163212 | TME                      |
| 0.029911223 | TME                      |
| 3.60E-11    | TME                      |
| 5.71E-05    | TME                      |
| 1.83E-26    | TME                      |
| 0.001017858 | Metabolism               |
| 0.004297501 | Metabolism               |
| 4.73E-08    | Metabolism               |
| 0.031415228 | Metabolism               |
| 0.283205686 | Metabolism               |
| 0.202725909 | TME                      |
| 5.94E-13    | TME                      |
| 0.648969787 | TME                      |
| 0.014905716 | TME                      |
| 0.002513552 | TME                      |
| 0.000209565 | TME                      |
| 0.000397543 | TME                      |
| 0.031207329 | TME                      |
| 0.003483657 | TME                      |
| 9.97E-14    | Proliferation/Metastasis |
| 0.000321689 | Proliferation/Metastasis |
| 0.003791833 | Metabolism               |

|             |                          |
|-------------|--------------------------|
| 1.46E-07    | Metabolism               |
| 0.13992929  | TME                      |
| 0.528204916 | Metabolism               |
| 3.08E-05    | Metabolism               |
| 0.885027622 | TME                      |
| 0.182685546 | Proliferation/Metastasis |
| 6.42E-18    | Proliferation/Metastasis |
| 3.82E-07    | TME                      |
| 0.006618861 | Metabolism               |
| 0.040025572 | Metabolism               |
| 4.62E-17    | Proliferation/Metastasis |
| 8.85E-09    | Proliferation/Metastasis |
| 0.000111215 | TME                      |
| 0.087562208 | TME                      |
| 0.000617128 | TME                      |
| 0.003564411 | TME                      |
| 0.00046938  | Proliferation/Metastasis |
| 0.016617014 | TME                      |
| 0.087393101 | TME                      |
| 3.63E-13    | Metabolism               |
| 0.439863293 | TME                      |
| 0.470990534 | TME                      |
| 0.001500693 | TME                      |
| 0.118562682 | TME                      |
| 0.000779011 | Metabolism               |
| 0.071029146 | Metabolism               |
| 2.17E-14    | Metabolism               |
| 0.001665841 | TME                      |
| 0.000172328 | Metabolism               |
| 4.83E-06    | TME                      |
| 7.44E-06    | TME                      |
| 0.069856957 | TME                      |
| 0.001513215 | TME                      |
| 0.007356366 | TME                      |
| 9.80E-14    | Metabolism               |
| 2.78E-09    | Proliferation/Metastasis |
| 4.81E-14    | Metabolism               |
| 2.23E-07    | Proliferation/Metastasis |
| 0.196396569 | Metabolism               |
| 1.51E-06    | Metabolism               |
| 0.000508161 | Metabolism               |
| 0.590394222 | Metabolism               |
| 0.000268775 | Metabolism               |

|             |                          |
|-------------|--------------------------|
| 1.48E-05    | Metabolism               |
| 7.46E-05    | Metabolism               |
| 0.646949491 | Metabolism               |
| 0.002220889 | Metabolism               |
| 0.125730375 | Metabolism               |
| 0.016411254 | Metabolism               |
| 0.124554928 | Metabolism               |
| 0.072118574 | Metabolism               |
| 0.000885864 | Metabolism               |
| 0.686997857 | TME                      |
| 0.152690949 | Proliferation/Metastasis |
| 0.002103784 | Metabolism               |
| 4.47E-22    | Proliferation/Metastasis |
| 0.066671041 | TME                      |
| 8.22E-05    | Proliferation/Metastasis |
| 7.47E-06    | Proliferation/Metastasis |
| 0.037186959 | TME                      |
| 1.23E-07    | TME                      |
| 0.585615376 | Metabolism               |
| 0.312344975 | Metabolism               |
| 5.13E-09    | Proliferation/Metastasis |
| 0.330270849 | Proliferation/Metastasis |
| 3.24E-11    | Proliferation/Metastasis |
| 3.72E-05    | Metabolism               |
| 1.81E-06    | Metabolism               |
| 3.55E-26    | Metabolism               |
| 1.62E-08    | Proliferation/Metastasis |
| 0.414659769 | TME                      |
| 0.001171469 | TME                      |
| 0.023352355 | Metabolism               |
| 6.69E-05    | Proliferation/Metastasis |
| 0.121268052 | Metabolism               |
| 2.47E-07    | TME                      |
| 4.21E-07    | TME                      |
| 9.84E-06    | TME                      |
| 0.383551175 | TME                      |
| 0.006475502 | Metabolism               |
| 2.75E-11    | TME                      |
| 0.19922814  | Proliferation/Metastasis |
| 2.87E-05    | TME                      |
| 2.46E-10    | Proliferation/Metastasis |
| 4.37E-07    | Proliferation/Metastasis |
| 0.000168807 | Metabolism               |

|             |                          |
|-------------|--------------------------|
| 0.318213074 | Proliferation/Metastasis |
| 0.083793736 | TME                      |
| 0.950871355 | Metabolism               |
| 0.021774658 | TME                      |
| 0.184463907 | TME                      |
| 0.000252957 | TME                      |
| 0.128176321 | TME                      |
| 1.98E-09    | TME                      |
| 0.000136174 | TME                      |
| 5.02E-08    | Metabolism               |
| 6.00E-18    | TME                      |
| 8.02E-06    | Metabolism               |
| 4.02E-08    | Metabolism               |
| 3.43E-17    | Proliferation/Metastasis |
| 2.07E-15    | Proliferation/Metastasis |
| 3.05E-06    | Metabolism               |
| 0.028384025 | Metabolism               |
| 0.077492074 | Metabolism               |
| 0.005244535 | Metabolism               |
| 2.99E-20    | Proliferation/Metastasis |
| 1.27E-05    | Proliferation/Metastasis |
| 0.141988644 | Metabolism               |
| 0.003259028 | Metabolism               |
| 0.156010728 | Metabolism               |
| 0.001723713 | TME                      |
| 0.023382309 | Metabolism               |
| 0.241234955 | Metabolism               |
| 0.05520427  | Metabolism               |
| 1.70E-05    | Metabolism               |
| 8.40E-10    | Proliferation/Metastasis |
| 0.036419951 | Metabolism               |
| 6.48E-09    | Metabolism               |
| 0.000254852 | Metabolism               |
| 0.702378266 | Metabolism               |
| 0.559074071 | Metabolism               |
| 0.695768232 | Metabolism               |
| 0.423015879 | Proliferation/Metastasis |
| 0.035242299 | Metabolism               |
| 0.869834679 | Metabolism               |
| 0.116712902 | Proliferation/Metastasis |
| 6.10E-24    | Metabolism               |
| 4.57E-05    | Metabolism               |
| 1.47E-19    | Metabolism               |



|             |                          |
|-------------|--------------------------|
| 6.58E-09    | Metabolism               |
| 0.000809147 | Metabolism               |
| 0.655968591 | Metabolism               |
| 0.25738979  | Metabolism               |
| 0.021473587 | Metabolism               |
| 0.059684045 | TME                      |
| 0.505476373 | TME                      |
| 0.023377593 | TME                      |
| 0.503768537 | TME                      |
| 0.009296659 | TME                      |
| 0.00224146  | Metabolism               |
| 4.56E-14    | Metabolism               |
| 1.46E-05    | Proliferation/Metastasis |
| 7.76E-06    | Metabolism               |
| 3.61E-15    | Proliferation/Metastasis |
| 6.85E-07    | Metabolism               |
| 1.25E-47    | TME                      |
| 0.006266798 | Metabolism               |
| 0.499983963 | Metabolism               |
| 0.012931572 | Metabolism               |
| 1.37E-05    | Metabolism               |
| 0.60464213  | TME                      |
| 0.569521407 | TME                      |
| 4.19E-13    | Proliferation/Metastasis |
| 1.73E-07    | Metabolism               |
| 2.06E-18    | Proliferation/Metastasis |
| 0.512924649 | Proliferation/Metastasis |
| 0.085221148 | TME                      |
| 0.025328422 | TME                      |
| 0.242669446 | TME                      |
| 0.000916236 | TME                      |
| 0.041486221 | Metabolism               |
| 0.000284555 | Proliferation/Metastasis |
| 0.000594714 | Metabolism               |
| 0.062031246 | Metabolism               |
| 0.888527646 | Proliferation/Metastasis |
| 7.96E-08    | Proliferation/Metastasis |
| 0.91825366  | Metabolism               |
| 0.002906865 | Metabolism               |
| 6.44E-05    | Metabolism               |
| 0.059434504 | Metabolism               |
| 0.030096472 | TME                      |
| 0.635722234 | TME                      |

|             |                          |
|-------------|--------------------------|
| 0.001354553 | TME                      |
| 0.378785498 | TME                      |
| 4.75E-07    | TME                      |
| 0.116223201 | Metabolism               |
| 0.163372721 | Metabolism               |
| 1.07E-05    | Metabolism               |
| 4.91E-06    | Metabolism               |
| 0.069998379 | Metabolism               |
| 9.15E-06    | TME                      |
| 0.354039441 | TME                      |
| 0.04253165  | TME                      |
| 0.880716    | TME                      |
| 0.499785323 | TME                      |
| 0.011336177 | TME                      |
| 0.024502186 | TME                      |
| 7.52E-05    | TME                      |
| 0.021617235 | TME                      |
| 0.585641169 | Proliferation/Metastasis |
| 2.31E-09    | Proliferation/Metastasis |
| 0.120936484 | Metabolism               |
| 0.493945653 | Metabolism               |
| 0.000315289 | TME                      |
| 0.142830636 | Metabolism               |
| 4.16E-07    | Metabolism               |
| 0.624152958 | TME                      |
| 2.27E-19    | Proliferation/Metastasis |
| 2.55E-15    | Proliferation/Metastasis |
| 4.36E-07    | TME                      |
| 0.257821625 | Metabolism               |
| 0.021766208 | Metabolism               |
| 0.005735732 | Proliferation/Metastasis |
| 8.84E-12    | Proliferation/Metastasis |
| 0.793112934 | TME                      |
| 0.666473439 | TME                      |
| 0.443869705 | TME                      |
| 0.999073199 | TME                      |
| 2.03E-15    | Proliferation/Metastasis |
| 0.22973749  | TME                      |
| 0.335066402 | TME                      |
| 5.69E-08    | Metabolism               |
| 0.981745532 | TME                      |
| 0.754075745 | TME                      |
| 0.000100929 | TME                      |

|             |                          |
|-------------|--------------------------|
| 4.39E-06    | TME                      |
| 0.000485871 | Metabolism               |
| 0.742674569 | Metabolism               |
| 0.583624869 | Metabolism               |
| 2.77E-05    | TME                      |
| 0.067802201 | Metabolism               |
| 0.218669204 | TME                      |
| 0.580003631 | TME                      |
| 0.625868756 | TME                      |
| 3.25E-07    | TME                      |
| 0.210370436 | TME                      |
| 0.587423945 | Metabolism               |
| 0.007487107 | Proliferation/Metastasis |
| 0.269955617 | Metabolism               |
| 2.82E-10    | Proliferation/Metastasis |
| 0.23451239  | Metabolism               |
| 0.092433142 | Metabolism               |
| 0.428243452 | Metabolism               |
| 0.000310294 | Metabolism               |
| 0.03126018  | Metabolism               |
| 0.524113426 | Metabolism               |
| 0.403223774 | Metabolism               |
| 0.147298401 | Metabolism               |
| 0.195519517 | Metabolism               |
| 0.044569607 | Metabolism               |
| 0.006127579 | Metabolism               |
| 0.409454186 | Metabolism               |
| 2.33E-05    | Metabolism               |
| 7.68E-09    | Metabolism               |
| 0.609770449 | TME                      |
| 1.87E-16    | Proliferation/Metastasis |
| 0.048344942 | Metabolism               |
| 7.05E-11    | Proliferation/Metastasis |
| 0.252402713 | TME                      |
| 0.00016932  | Proliferation/Metastasis |
| 8.25E-06    | Proliferation/Metastasis |
| 0.785938561 | TME                      |
| 0.577838697 | TME                      |
| 4.26E-20    | Metabolism               |
| 7.35E-24    | Metabolism               |
| 0.762230702 | Proliferation/Metastasis |
| 0.00458688  | Proliferation/Metastasis |
| 3.59E-12    | Proliferation/Metastasis |

|             |                          |
|-------------|--------------------------|
| 0.009440565 | Metabolism               |
| 6.90E-09    | Metabolism               |
| 0.029212465 | Metabolism               |
| 0.20053591  | Proliferation/Metastasis |
| 0.116769405 | TME                      |
| 0.106763311 | TME                      |
| 4.62E-09    | Metabolism               |
| 5.14E-23    | Proliferation/Metastasis |
| 9.82E-23    | Metabolism               |
| 0.313822148 | TME                      |
| 0.104542546 | TME                      |
| 0.371193554 | TME                      |
| 0.082435055 | TME                      |
| 0.547275219 | Metabolism               |
| 8.97E-15    | TME                      |
| 9.47E-23    | Proliferation/Metastasis |
| 0.242497258 | TME                      |
| 8.11E-19    | Proliferation/Metastasis |
| 4.21E-10    | Proliferation/Metastasis |
| 7.74E-23    | Metabolism               |
| 0.037907738 | Proliferation/Metastasis |
| 0.839543341 | TME                      |
| 0.025101285 | Metabolism               |
| 0.091609836 | TME                      |
| 0.005702897 | TME                      |
| 0.02686699  | TME                      |
| 0.037883479 | TME                      |
| 9.66E-10    | TME                      |
| 0.580572543 | TME                      |
| 7.31E-07    | Metabolism               |
| 3.20E-05    | TME                      |
| 0.006708368 | Metabolism               |
| 3.31E-10    | Metabolism               |
| 7.51E-15    | Proliferation/Metastasis |
| 2.23E-08    | Proliferation/Metastasis |
| 0.032472927 | Metabolism               |
| 0.001111802 | Metabolism               |
| 2.18E-10    | Metabolism               |
| 8.87E-13    | Metabolism               |
| 0.0010518   | Proliferation/Metastasis |
| 0.001029455 | Proliferation/Metastasis |
| 0.112906266 | Metabolism               |
| 0.339240736 | Metabolism               |

|             |                          |
|-------------|--------------------------|
| 0.629601264 | Metabolism               |
| 0.034294611 | TME                      |
| 0.11607421  | Metabolism               |
| 0.153502839 | Metabolism               |
| 0.443915102 | Metabolism               |
| 4.33E-20    | Metabolism               |
| 1.10E-16    | Proliferation/Metastasis |
| 0.001270165 | Metabolism               |
| 0.961049278 | Metabolism               |
| 0.641856203 | Metabolism               |
| 0.000132157 | Metabolism               |
| 4.07E-09    | Metabolism               |
| 0.012556277 | Metabolism               |
| 0.001039246 | Proliferation/Metastasis |
| 0.012291048 | Metabolism               |
| 1.12E-11    | Metabolism               |
| 1.27E-15    | Proliferation/Metastasis |
| 0.853246893 | Metabolism               |
| 3.88E-33    | Metabolism               |
| 1.83E-17    | Metabolism               |
| 6.67E-07    | Metabolism               |
| 0.012690271 | Metabolism               |
| 0.04731268  | Metabolism               |
| 0.042831557 | Metabolism               |
| 0.000470193 | Metabolism               |
| 0.498751352 | TME                      |
| 0.253044408 | TME                      |
| 0.001671072 | TME                      |
| 0.646628309 | TME                      |
| 0.005754547 | TME                      |
| 1.14E-06    | Metabolism               |
| 0.005376723 | Metabolism               |
| 6.00E-30    | Proliferation/Metastasis |
| 2.82E-08    | Metabolism               |
| 1.10E-12    | Proliferation/Metastasis |
| 3.74E-06    | Metabolism               |
| 1.80E-07    | TME                      |
| 0.766629993 | Metabolism               |
| 2.47E-05    | Metabolism               |
| 3.47E-09    | Metabolism               |
| 0.006635383 | Metabolism               |
| 0.166467572 | TME                      |
| 0.007508824 | TME                      |

|             |                          |
|-------------|--------------------------|
| 1.14E-19    | Proliferation/Metastasis |
| 1.09E-17    | Metabolism               |
| 0.00142141  | Proliferation/Metastasis |
| 6.43E-09    | Proliferation/Metastasis |
| 5.19E-08    | TME                      |
| 4.87E-06    | TME                      |
| 1.45E-06    | TME                      |
| 1.89E-06    | TME                      |
| 3.79E-13    | Metabolism               |
| 4.90E-07    | Proliferation/Metastasis |
| 5.19E-06    | Metabolism               |
| 0.038330906 | Metabolism               |
| 0.008382719 | Proliferation/Metastasis |
| 0.00119914  | Proliferation/Metastasis |
| 0.012337501 | Metabolism               |
| 0.406917991 | Metabolism               |
| 0.003885844 | Metabolism               |
| 0.000281096 | Metabolism               |
| 0.002800662 | TME                      |
| 3.76E-12    | TME                      |
| 0.00024397  | TME                      |
| 5.06E-08    | TME                      |
| 4.56E-05    | TME                      |
| 0.136645192 | Metabolism               |
| 0.205983716 | Metabolism               |
| 0.185988493 | Metabolism               |
| 0.034093739 | Metabolism               |
| 0.769819348 | Metabolism               |
| 0.00877218  | TME                      |
| 0.017769679 | TME                      |
| 3.45E-08    | TME                      |
| 1.26E-08    | TME                      |
| 1.04E-08    | TME                      |
| 9.10E-09    | TME                      |
| 3.86E-08    | TME                      |
| 1.58E-05    | TME                      |
| 7.38E-08    | TME                      |
| 2.23E-06    | Proliferation/Metastasis |
| 5.39E-11    | Proliferation/Metastasis |
| 7.72E-08    | Metabolism               |
| 5.69E-23    | Metabolism               |
| 1.45E-13    | TME                      |
| 0.018828853 | Metabolism               |

|             |                          |
|-------------|--------------------------|
| 0.011057835 | Metabolism               |
| 1.85E-11    | TME                      |
| 3.45E-17    | Proliferation/Metastasis |
| 1.17E-16    | Proliferation/Metastasis |
| 0.001029416 | TME                      |
| 0.001221995 | Metabolism               |
| 1.52E-19    | Metabolism               |
| 2.75E-17    | Proliferation/Metastasis |
| 1.33E-09    | Proliferation/Metastasis |
| 2.62E-10    | TME                      |
| 3.19E-10    | TME                      |
| 2.51E-09    | TME                      |
| 2.45E-06    | TME                      |
| 7.68E-05    | Proliferation/Metastasis |
| 3.61E-05    | TME                      |
| 2.62E-07    | TME                      |
| 1.43E-09    | Metabolism               |
| 2.66E-11    | TME                      |
| 2.54E-09    | TME                      |
| 7.87E-06    | TME                      |
| 0.18966543  | TME                      |
| 0.960197231 | Metabolism               |
| 0.376916263 | Metabolism               |
| 0.000363431 | Metabolism               |
| 5.88E-11    | TME                      |
| 2.93E-08    | Metabolism               |
| 2.03E-10    | TME                      |
| 0.002317865 | TME                      |
| 1.25E-09    | TME                      |
| 0.005848378 | TME                      |
| 7.59E-14    | TME                      |
| 1.34E-05    | Metabolism               |
| 1.19E-07    | Proliferation/Metastasis |
| 0.449076103 | Metabolism               |
| 2.65E-07    | Proliferation/Metastasis |
| 5.99E-12    | Metabolism               |
| 0.81861486  | Metabolism               |
| 0.932403411 | Metabolism               |
| 7.27E-06    | Metabolism               |
| 0.057199711 | Metabolism               |
| 0.000440975 | Metabolism               |
| 3.57E-07    | Metabolism               |
| 0.233381943 | Metabolism               |

|             |                          |
|-------------|--------------------------|
| 0.0011162   | Metabolism               |
| 1.82E-08    | Metabolism               |
| 0.264294973 | Metabolism               |
| 0.134549661 | Metabolism               |
| 1.78E-06    | Metabolism               |
| 5.45E-12    | Metabolism               |
| 0.000165331 | TME                      |
| 6.58E-05    | Proliferation/Metastasis |
| 7.02E-07    | Metabolism               |
| 0.014439928 | Proliferation/Metastasis |
| 1.05E-08    | TME                      |
| 8.94E-08    | Proliferation/Metastasis |
| 3.67E-11    | Proliferation/Metastasis |
| 4.81E-07    | TME                      |
| 1.61E-06    | TME                      |
| 2.52E-12    | Metabolism               |
| 6.25E-12    | Metabolism               |
| 0.001218737 | Proliferation/Metastasis |
| 1.94E-11    | Proliferation/Metastasis |
| 7.13E-13    | Proliferation/Metastasis |
| 0.001509426 | Metabolism               |
| 2.76E-07    | Metabolism               |
| 0.104816001 | Metabolism               |
| 2.46E-10    | Proliferation/Metastasis |
| 2.55E-07    | TME                      |
| 1.06E-05    | TME                      |
| 0.001814135 | Metabolism               |
| 3.71E-12    | Proliferation/Metastasis |
| 7.97E-09    | Metabolism               |
| 4.58E-07    | TME                      |
| 4.76E-07    | TME                      |
| 0.033735625 | TME                      |
| 3.24E-09    | TME                      |
| 2.28E-06    | Metabolism               |
| 0.715538068 | TME                      |
| 0.002383413 | Proliferation/Metastasis |
| 6.42E-08    | TME                      |
| 5.54E-10    | Proliferation/Metastasis |
| 1.45E-12    | Proliferation/Metastasis |
| 7.64E-05    | Metabolism               |
| 1.93E-34    | Proliferation/Metastasis |
| 3.75E-09    | TME                      |
| 0.714203958 | Metabolism               |



|             |                          |
|-------------|--------------------------|
| 0.001126588 | TME                      |
| 6.53E-13    | TME                      |
| 1.81E-05    | TME                      |
| 8.89E-09    | TME                      |
| 0.010760279 | TME                      |
| 1.62E-09    | TME                      |
| 0.767272517 | Metabolism               |
| 0.000637253 | TME                      |
| 0.960259389 | Metabolism               |
| 0.031470327 | Metabolism               |
| 5.85E-08    | Proliferation/Metastasis |
| 0.005936947 | Proliferation/Metastasis |
| 1.31E-26    | Metabolism               |
| 0.009675107 | Metabolism               |
| 0.710389362 | Metabolism               |
| 1.68E-09    | Metabolism               |
| 0.000557052 | Proliferation/Metastasis |
| 0.035284201 | Proliferation/Metastasis |
| 0.019231939 | Metabolism               |
| 8.87E-07    | Metabolism               |
| 6.62E-08    | Metabolism               |
| 2.24E-07    | TME                      |
| 0.003126852 | Metabolism               |
| 9.70E-05    | Metabolism               |
| 0.039500086 | Metabolism               |
| 3.86E-11    | Metabolism               |
| 9.99E-07    | Proliferation/Metastasis |
| 4.66E-13    | Metabolism               |
| 1.01E-09    | Metabolism               |
| 0.015928343 | Metabolism               |
| 1.46E-37    | Metabolism               |
| 1.45E-34    | Metabolism               |
| 2.29E-07    | Metabolism               |
| 0.003715238 | Proliferation/Metastasis |
| 0.293778281 | Metabolism               |
| 4.55E-07    | Metabolism               |
| 5.49E-13    | Proliferation/Metastasis |
| 8.24E-18    | Metabolism               |
| 7.31E-05    | Metabolism               |
| 2.97E-09    | Metabolism               |
| 0.001262939 | Metabolism               |
| 1.62E-05    | Metabolism               |
| 1.60E-05    | Metabolism               |

|             |                          |
|-------------|--------------------------|
| 0.789118223 | Metabolism               |
| 0.000383036 | Metabolism               |
| 1.58E-10    | TME                      |
| 3.26E-08    | TME                      |
| 1.02E-06    | TME                      |
| 8.81E-10    | TME                      |
| 9.23E-10    | TME                      |
| 0.107584903 | Metabolism               |
| 0.003185814 | Metabolism               |
| 3.01E-08    | Proliferation/Metastasis |
| 0.000297592 | Metabolism               |
| 0.000134237 | Proliferation/Metastasis |
| 0.97077078  | Metabolism               |
| 0.000455228 | TME                      |
| 0.277627485 | Metabolism               |
| 2.95E-13    | Metabolism               |
| 0.000277195 | Metabolism               |
| 0.011288827 | Metabolism               |
| 6.23E-06    | TME                      |
| 0.097943025 | TME                      |
| 5.99E-15    | Proliferation/Metastasis |
| 2.95E-08    | Metabolism               |
| 0.27670686  | Proliferation/Metastasis |
| 0.000526584 | Proliferation/Metastasis |
| 0.008130181 | TME                      |
| 0.001931381 | TME                      |
| 2.86E-05    | TME                      |
| 0.004556491 | TME                      |
| 0.742218681 | Metabolism               |
| 0.001834128 | Proliferation/Metastasis |
| 0.065957693 | Metabolism               |
| 0.581941113 | Metabolism               |
| 0.219720146 | Proliferation/Metastasis |
| 5.60E-07    | Proliferation/Metastasis |
| 0.075006469 | Metabolism               |
| 0.278329254 | Metabolism               |
| 0.059343896 | Metabolism               |
| 0.00162057  | Metabolism               |
| 0.23790762  | TME                      |
| 1.27E-11    | TME                      |
| 0.003718124 | TME                      |
| 2.47E-05    | TME                      |
| 0.000173028 | TME                      |

|             |                          |
|-------------|--------------------------|
| 0.063291804 | Metabolism               |
| 0.107421816 | Metabolism               |
| 0.015384463 | Metabolism               |
| 2.92E-06    | Metabolism               |
| 0.003539389 | Metabolism               |
| 2.59E-14    | TME                      |
| 0.006361776 | TME                      |
| 0.000379093 | TME                      |
| 7.43E-06    | TME                      |
| 2.14E-07    | TME                      |
| 0.000464    | TME                      |
| 0.000314397 | TME                      |
| 0.438145475 | TME                      |
| 0.002608996 | TME                      |
| 0.005347498 | Proliferation/Metastasis |
| 0.000402415 | Proliferation/Metastasis |
| 0.043406014 | Metabolism               |
| 0.195091921 | Metabolism               |
| 0.077026052 | TME                      |
| 0.626640354 | Metabolism               |
| 1.92E-05    | Metabolism               |
| 7.62E-07    | TME                      |
| 3.55E-18    | Proliferation/Metastasis |
| 0.002205524 | Proliferation/Metastasis |
| 0.865378056 | TME                      |
| 0.483573693 | Metabolism               |
| 5.61E-07    | Metabolism               |
| 0.424311272 | Proliferation/Metastasis |
| 1.03E-15    | Proliferation/Metastasis |
| 2.44E-07    | TME                      |
| 2.64E-07    | TME                      |
| 7.64E-07    | TME                      |
| 1.08E-09    | TME                      |
| 5.87E-15    | Proliferation/Metastasis |
| 3.42E-15    | TME                      |
| 1.12E-05    | TME                      |
| 1.17E-07    | Metabolism               |
| 4.29E-08    | TME                      |
| 5.40E-06    | TME                      |
| 0.130564491 | TME                      |
| 0.000116627 | TME                      |
| 0.010792594 | Metabolism               |
| 0.484496331 | Metabolism               |

|             |                          |
|-------------|--------------------------|
| 0.036333741 | Metabolism               |
| 5.31E-11    | TME                      |
| 0.009419953 | Metabolism               |
| 0.000140917 | TME                      |
| 0.000244676 | TME                      |
| 1.10E-05    | TME                      |
| 0.596131516 | TME                      |
| 3.27E-10    | TME                      |
| 6.58E-05    | Metabolism               |
| 2.04E-05    | Proliferation/Metastasis |
| 0.331997385 | Metabolism               |
| 3.20E-20    | Proliferation/Metastasis |
| 0.04446528  | Metabolism               |
| 0.233028888 | Metabolism               |
| 1.77E-05    | Metabolism               |
| 0.003333033 | Metabolism               |
| 0.911469905 | Metabolism               |
| 0.144063724 | Metabolism               |
| 1.55E-05    | Metabolism               |
| 0.006099067 | Metabolism               |
| 0.002268254 | Metabolism               |
| 0.034996497 | Metabolism               |
| 0.03095325  | Metabolism               |
| 0.000194573 | Metabolism               |
| 3.35E-07    | Metabolism               |
| 2.31E-11    | Metabolism               |
| 6.83E-05    | TME                      |
| 2.75E-19    | Proliferation/Metastasis |
| 1.27E-06    | Metabolism               |
| 0.004041152 | Proliferation/Metastasis |
| 7.46E-05    | TME                      |
| 2.69E-15    | Proliferation/Metastasis |
| 8.30E-15    | Proliferation/Metastasis |
| 2.32E-05    | TME                      |
| 0.028625042 | TME                      |
| 3.87E-31    | Metabolism               |
| 4.24E-34    | Metabolism               |
| 0.007767035 | Proliferation/Metastasis |
| 0.68155476  | Proliferation/Metastasis |
| 1.67E-19    | Proliferation/Metastasis |
| 0.15562122  | Metabolism               |
| 4.72E-14    | Metabolism               |
| 0.000101134 | Metabolism               |

|             |                          |
|-------------|--------------------------|
| 0.000165335 | Proliferation/Metastasis |
| 2.76E-08    | TME                      |
| 2.04E-07    | TME                      |
| 6.36E-05    | Metabolism               |
| 4.49E-28    | Proliferation/Metastasis |
| 5.95E-38    | Metabolism               |
| 1.50E-06    | TME                      |
| 4.33E-05    | TME                      |
| 0.012998987 | TME                      |
| 9.76E-12    | TME                      |
| 0.378398313 | Metabolism               |
| 4.42E-11    | TME                      |
| 7.56E-31    | Proliferation/Metastasis |
| 0.000125456 | TME                      |
| 8.53E-28    | Proliferation/Metastasis |
| 0.060888759 | Proliferation/Metastasis |
| 3.55E-22    | Metabolism               |
| 2.39E-09    | Proliferation/Metastasis |
| 1.69E-07    | TME                      |
| 0.002326504 | Metabolism               |
| 0.130223371 | TME                      |
| 1.51E-14    | TME                      |
| 1.49E-08    | TME                      |
| 0.000689655 | TME                      |
| 1.40E-06    | TME                      |
| 4.30E-12    | TME                      |
| 8.05E-05    | Metabolism               |
| 1.87E-06    | TME                      |
| 0.13474294  | Metabolism               |
| 1.49E-10    | Metabolism               |
| 1.32E-08    | Proliferation/Metastasis |
| 5.57E-08    | Proliferation/Metastasis |
| 0.043687621 | Metabolism               |
| 0.007308983 | Metabolism               |
| 1.20E-05    | Metabolism               |
| 1.98E-21    | Metabolism               |
| 0.022287668 | Proliferation/Metastasis |
| 1.34E-12    | Proliferation/Metastasis |
| 0.215348169 | Metabolism               |
| 0.124058505 | Metabolism               |
| 0.422534468 | Metabolism               |
| 1.35E-07    | TME                      |
| 0.056797988 | Metabolism               |

|             |                          |
|-------------|--------------------------|
| 0.007126218 | Metabolism               |
| 0.717954562 | Metabolism               |
| 1.33E-26    | Metabolism               |
| 1.08E-17    | Proliferation/Metastasis |
| 0.086743033 | Metabolism               |
| 0.718544562 | Metabolism               |
| 0.164411305 | Metabolism               |
| 0.000282549 | Metabolism               |
| 1.15E-10    | Metabolism               |
| 7.49E-06    | Metabolism               |
| 9.30E-06    | Proliferation/Metastasis |
| 0.31872416  | Metabolism               |
| 8.34E-05    | Metabolism               |
| 7.26E-29    | Proliferation/Metastasis |
| 0.817372948 | Metabolism               |
| 1.07E-24    | Metabolism               |
| 2.74E-24    | Metabolism               |
| 0.000219782 | Metabolism               |
| 0.033408953 | Metabolism               |
| 0.243270977 | Metabolism               |
| 0.291149674 | Metabolism               |
| 2.42E-10    | Metabolism               |
| 1.27E-06    | TME                      |
| 0.000487826 | TME                      |
| 9.83E-07    | TME                      |
| 7.17E-05    | TME                      |
| 0.004267365 | TME                      |
| 1.53E-07    | Metabolism               |
| 0.244774847 | Metabolism               |
| 3.58E-29    | Proliferation/Metastasis |
| 3.95E-06    | Metabolism               |
| 3.22E-07    | Proliferation/Metastasis |
| 0.682269251 | Metabolism               |
| 0.348549855 | TME                      |
| 0.47919786  | Metabolism               |
| 8.90E-11    | Metabolism               |
| 0.007032545 | Metabolism               |
| 0.000891376 | Metabolism               |
| 3.26E-10    | TME                      |
| 2.54E-05    | TME                      |
| 2.47E-23    | Proliferation/Metastasis |
| 0.007717255 | Metabolism               |
| 0.511470056 | Proliferation/Metastasis |

|             |                          |
|-------------|--------------------------|
| 2.39E-13    | Proliferation/Metastasis |
| 0.033163232 | TME                      |
| 3.99E-06    | TME                      |
| 2.06E-07    | TME                      |
| 2.28E-07    | TME                      |
| 0.161813614 | Metabolism               |
| 1.22E-12    | Proliferation/Metastasis |
| 1.12E-08    | Metabolism               |
| 2.79E-34    | Metabolism               |
| 0.006801144 | Proliferation/Metastasis |
| 0.000889945 | Proliferation/Metastasis |
| 4.49E-05    | Metabolism               |
| 2.57E-11    | Metabolism               |
| 2.20E-05    | Metabolism               |
| 0.001416944 | Metabolism               |
| 4.15E-08    | TME                      |
| 6.60E-10    | TME                      |
| 2.83E-16    | TME                      |
| 4.14E-10    | TME                      |
| 6.55E-25    | TME                      |
| 0.015829557 | Metabolism               |
| 3.43E-05    | Metabolism               |
| 1.14E-05    | Metabolism               |
| 0.146394486 | Metabolism               |
| 2.14E-05    | Metabolism               |
| 1.00E-08    | TME                      |
| 5.55E-18    | TME                      |
| 0.284389501 | TME                      |
| 2.11E-06    | TME                      |
| 8.72E-09    | TME                      |
| 2.54E-08    | TME                      |
| 1.98E-07    | TME                      |
| 0.071972539 | TME                      |
| 0.000373789 | TME                      |
| 1.22E-07    | Proliferation/Metastasis |
| 0.032332745 | Proliferation/Metastasis |
| 1.77E-12    | Metabolism               |
| 0.448657855 | Metabolism               |
| 6.82E-05    | TME                      |
| 0.279263929 | Metabolism               |
| 1.09E-05    | Metabolism               |
| 0.002284031 | TME                      |
| 2.45E-06    | Proliferation/Metastasis |

|             |                          |
|-------------|--------------------------|
| 0.000753658 | Proliferation/Metastasis |
| 2.38E-08    | TME                      |
| 0.761731023 | Metabolism               |
| 4.80E-16    | Metabolism               |
| 0.00013117  | Proliferation/Metastasis |
| 0.888253424 | Proliferation/Metastasis |
| 3.84E-12    | TME                      |
| 0.773921731 | TME                      |
| 5.68E-09    | TME                      |
| 3.74E-08    | TME                      |
| 3.91E-06    | Proliferation/Metastasis |
| 3.01E-12    | TME                      |
| 0.008582506 | TME                      |
| 6.43E-05    | Metabolism               |
| 0.000470306 | TME                      |
| 0.002145986 | TME                      |
| 0.000852659 | TME                      |
| 0.485250024 | TME                      |
| 0.000102227 | Metabolism               |
| 0.894146594 | Metabolism               |
| 7.54E-22    | Metabolism               |
| 0.023268742 | TME                      |
| 9.42E-17    | Metabolism               |
| 1.27E-13    | TME                      |
| 2.58E-07    | TME                      |
| 0.00010686  | TME                      |
| 0.06631088  | TME                      |
| 2.15E-10    | TME                      |
| 8.06E-32    | Metabolism               |
| 2.84E-05    | Proliferation/Metastasis |
| 5.76E-31    | Metabolism               |
| 0.834075116 | Proliferation/Metastasis |
| 0.004822104 | Metabolism               |
| 1.66E-08    | Metabolism               |
| 1.32E-07    | Metabolism               |
| 7.64E-09    | Metabolism               |
| 2.98E-09    | Metabolism               |
| 0.483832002 | Metabolism               |
| 0.439047263 | Metabolism               |
| 0.49643113  | Metabolism               |
| 0.092352267 | Metabolism               |
| 0.13496603  | Metabolism               |
| 0.000498781 | Metabolism               |



|             |                          |
|-------------|--------------------------|
| 0.988427841 | Metabolism               |
| 0.01762049  | Metabolism               |
| 0.007107258 | Metabolism               |
| 0.112944584 | TME                      |
| 3.01E-05    | Proliferation/Metastasis |
| 0.369489138 | Metabolism               |
| 4.27E-12    | Proliferation/Metastasis |
| 0.001434655 | TME                      |
| 0.083767784 | Proliferation/Metastasis |
| 0.024797992 | Proliferation/Metastasis |
| 0.536980001 | TME                      |
| 2.49E-06    | TME                      |
| 1.69E-05    | Metabolism               |
| 0.000842551 | Metabolism               |
| 1.60E-12    | Proliferation/Metastasis |
| 1.00E-07    | Proliferation/Metastasis |
| 0.035494111 | Proliferation/Metastasis |
| 0.001584301 | Metabolism               |
| 0.048893545 | Metabolism               |
| 2.84E-24    | Metabolism               |
| 0.000267099 | Proliferation/Metastasis |
| 0.148773054 | TME                      |
| 0.027797386 | TME                      |
| 0.07830432  | Metabolism               |
| 0.218489125 | Proliferation/Metastasis |
| 0.134996036 | Metabolism               |
| 2.40E-14    | TME                      |
| 6.18E-13    | TME                      |
| 0.391390747 | TME                      |
| 5.72E-09    | TME                      |
| 0.51407365  | Metabolism               |
| 9.40E-18    | TME                      |
| 6.98E-06    | Proliferation/Metastasis |
| 0.000555958 | TME                      |
| 0.000725787 | Proliferation/Metastasis |
| 5.78E-24    | Proliferation/Metastasis |
| 0.60205048  | Metabolism               |
| 7.24E-15    | Proliferation/Metastasis |
| 9.74E-05    | TME                      |
| 0.235723814 | Metabolism               |
| 0.001422362 | TME                      |
| 3.91E-08    | TME                      |
| 1.23E-15    | TME                      |

|             |                          |
|-------------|--------------------------|
| 0.00521642  | TME                      |
| 0.059937282 | TME                      |
| 1.02E-07    | TME                      |
| 2.75E-06    | Metabolism               |
| 1.69E-15    | TME                      |
| 2.63E-08    | Metabolism               |
| 0.002310808 | Metabolism               |
| 1.61E-13    | Proliferation/Metastasis |
| 0.015302416 | Proliferation/Metastasis |
| 0.528933245 | Metabolism               |
| 0.001042969 | Metabolism               |
| 0.080436318 | Metabolism               |
| 1.96E-17    | Metabolism               |
| 5.77E-28    | Proliferation/Metastasis |
| 3.80E-05    | Proliferation/Metastasis |
| 0.006061012 | Metabolism               |
| 0.378146725 | Metabolism               |
| 1.96E-07    | Metabolism               |
| 0.102193342 | TME                      |
| 0.000259565 | Metabolism               |
| 0.187699366 | Metabolism               |
| 0.42769833  | Metabolism               |
| 0.262439446 | Metabolism               |
| 6.44E-13    | Proliferation/Metastasis |
| 0.000103804 | Metabolism               |
| 0.002804943 | Metabolism               |
| 0.195638008 | Metabolism               |
| 2.96E-06    | Metabolism               |
| 1.81E-09    | Metabolism               |
| 0.001933204 | Metabolism               |
| 0.010996897 | Proliferation/Metastasis |
| 2.80E-05    | Metabolism               |
| 2.91E-05    | Metabolism               |
| 0.014779702 | Proliferation/Metastasis |
| 3.55E-15    | Metabolism               |
| 0.390144016 | Metabolism               |
| 7.73E-12    | Metabolism               |
| 6.19E-11    | Metabolism               |
| 3.76E-11    | Metabolism               |
| 5.03E-05    | Metabolism               |
| 0.192705751 | Metabolism               |
| 1.82E-09    | Metabolism               |
| 7.40E-06    | TME                      |

|             |                          |
|-------------|--------------------------|
| 0.900284598 | TME                      |
| 0.049893828 | TME                      |
| 0.016673597 | TME                      |
| 2.37E-05    | TME                      |
| 1.02E-05    | Metabolism               |
| 8.86E-23    | Metabolism               |
| 0.087115918 | Proliferation/Metastasis |
| 6.69E-13    | Metabolism               |
| 2.56E-10    | Proliferation/Metastasis |
| 0.000314133 | Metabolism               |
| 6.05E-26    | TME                      |
| 4.18E-05    | Metabolism               |
| 1.18E-05    | Metabolism               |
| 0.700665556 | Metabolism               |
| 0.050521702 | Metabolism               |
| 3.25E-05    | TME                      |
| 4.08E-06    | TME                      |
| 0.004173725 | Proliferation/Metastasis |
| 0.878567626 | Metabolism               |
| 3.41E-21    | Proliferation/Metastasis |
| 5.39E-11    | Proliferation/Metastasis |
| 0.888738788 | TME                      |
| 0.224613482 | TME                      |
| 0.185425226 | TME                      |
| 0.175813806 | TME                      |
| 0.827374106 | Metabolism               |
| 0.000354528 | Proliferation/Metastasis |
| 0.504624977 | Metabolism               |
| 0.019658772 | Metabolism               |
| 0.542739001 | Proliferation/Metastasis |
| 0.133840766 | Proliferation/Metastasis |
| 0.396229623 | Metabolism               |
| 0.074618379 | Metabolism               |
| 0.078965717 | Metabolism               |
| 0.218686445 | Metabolism               |
| 0.906120145 | TME                      |
| 0.907345241 | TME                      |
| 0.380558524 | TME                      |
| 0.106835479 | TME                      |
| 0.536977137 | TME                      |
| 0.425807441 | Metabolism               |
| 0.003266997 | Metabolism               |
| 0.256844117 | Metabolism               |

|             |                          |
|-------------|--------------------------|
| 0.44164066  | Metabolism               |
| 0.00873225  | Metabolism               |
| 0.826323034 | TME                      |
| 0.656465688 | TME                      |
| 0.145659162 | TME                      |
| 0.408639399 | TME                      |
| 0.209775736 | TME                      |
| 0.209509959 | TME                      |
| 0.187615598 | TME                      |
| 0.149011828 | TME                      |
| 0.101826651 | TME                      |
| 0.148785211 | Proliferation/Metastasis |
| 0.74068588  | Proliferation/Metastasis |
| 0.03353569  | Metabolism               |
| 0.455449467 | Metabolism               |
| 0.447001465 | TME                      |
| 0.846581892 | Metabolism               |
| 0.518301235 | Metabolism               |
| 0.206449222 | TME                      |
| 0.370733666 | Proliferation/Metastasis |
| 0.515013706 | Proliferation/Metastasis |
| 0.878852399 | TME                      |
| 0.046607371 | Metabolism               |
| 0.852251133 | Metabolism               |
| 0.156206622 | Proliferation/Metastasis |
| 0.272797187 | Proliferation/Metastasis |
| 0.122580727 | TME                      |
| 0.018928872 | TME                      |
| 0.173122759 | TME                      |
| 0.316678991 | TME                      |
| 0.000261257 | Proliferation/Metastasis |
| 0.604892076 | TME                      |
| 0.128762454 | TME                      |
| 0.118074726 | Metabolism               |
| 0.124202905 | TME                      |
| 0.19126627  | TME                      |
| 0.222516897 | TME                      |
| 0.116644959 | TME                      |
| 0.027870904 | Metabolism               |
| 0.492781091 | Metabolism               |
| 0.018658318 | Metabolism               |
| 0.616548835 | TME                      |
| 0.039881806 | Metabolism               |

|             |                          |
|-------------|--------------------------|
| 0.466039121 | TME                      |
| 0.195414129 | TME                      |
| 0.145812582 | TME                      |
| 0.088619518 | TME                      |
| 0.031409081 | TME                      |
| 0.104259516 | Metabolism               |
| 0.036964672 | Proliferation/Metastasis |
| 0.00185476  | Metabolism               |
| 0.175137058 | Proliferation/Metastasis |
| 0.46667458  | Metabolism               |
| 0.645329905 | Metabolism               |
| 0.426927711 | Metabolism               |
| 0.449681265 | Metabolism               |
| 0.097349092 | Metabolism               |
| 0.392415534 | Metabolism               |
| 0.322635771 | Metabolism               |
| 0.585239896 | Metabolism               |
| 0.390265661 | Metabolism               |
| 0.830134334 | Metabolism               |
| 0.528072901 | Metabolism               |
| 0.407472949 | Metabolism               |
| 0.462566499 | Metabolism               |
| 0.487358535 | Metabolism               |
| 0.131650465 | TME                      |
| 0.761338278 | Proliferation/Metastasis |
| 0.624989869 | Metabolism               |
| 0.663649789 | Proliferation/Metastasis |
| 0.147598896 | TME                      |
| 0.010271592 | Proliferation/Metastasis |
| 0.000454224 | Proliferation/Metastasis |
| 0.011728617 | TME                      |
| 0.050463147 | TME                      |
| 0.041535867 | Metabolism               |
| 0.001667809 | Metabolism               |
| 0.986152403 | Proliferation/Metastasis |
| 0.002316646 | Proliferation/Metastasis |
| 0.043179478 | Proliferation/Metastasis |
| 0.929761976 | Metabolism               |
| 0.03269584  | Metabolism               |
| 0.669036435 | Metabolism               |
| 0.029993279 | Proliferation/Metastasis |
| 0.109856044 | TME                      |
| 0.129513247 | TME                      |

|             |                          |
|-------------|--------------------------|
| 0.205793116 | Metabolism               |
| 0.169686398 | Proliferation/Metastasis |
| 0.000875599 | Metabolism               |
| 0.370726134 | TME                      |
| 0.455888315 | TME                      |
| 0.789274207 | TME                      |
| 0.455650648 | TME                      |
| 0.076471388 | Metabolism               |
| 0.003102661 | TME                      |
| 0.027788285 | Proliferation/Metastasis |
| 0.090704189 | TME                      |
| 0.001753208 | Proliferation/Metastasis |
| 0.003255892 | Proliferation/Metastasis |
| 0.037269818 | Metabolism               |
| 0.187831715 | Proliferation/Metastasis |
| 0.136292346 | TME                      |
| 0.004115425 | Metabolism               |
| 0.832777786 | TME                      |
| 0.056221555 | TME                      |
| 0.100893392 | TME                      |
| 0.131946723 | TME                      |
| 0.351802397 | TME                      |
| 0.21703941  | TME                      |
| 0.357853567 | Metabolism               |
| 0.167821538 | TME                      |
| 0.441187126 | Metabolism               |
| 0.075569358 | Metabolism               |
| 0.027372533 | Proliferation/Metastasis |
| 0.769209014 | Proliferation/Metastasis |
| 0.310271195 | Metabolism               |
| 0.888412162 | Metabolism               |
| 0.494068339 | Metabolism               |
| 0.818567726 | Metabolism               |
| 0.060551543 | Proliferation/Metastasis |
| 0.119269681 | Proliferation/Metastasis |
| 0.194721488 | Metabolism               |
| 0.324120142 | Metabolism               |
| 0.017839926 | Metabolism               |
| 0.2875213   | TME                      |
| 0.144940398 | Metabolism               |
| 0.173620388 | Metabolism               |
| 0.669024405 | Metabolism               |
| 0.071438006 | Metabolism               |

|             |                          |
|-------------|--------------------------|
| 6.22E-06    | Proliferation/Metastasis |
| 0.69087033  | Metabolism               |
| 0.081239519 | Metabolism               |
| 0.505040033 | Metabolism               |
| 0.092934707 | Metabolism               |
| 0.260736034 | Metabolism               |
| 0.295264345 | Metabolism               |
| 0.805647015 | Proliferation/Metastasis |
| 0.031004269 | Metabolism               |
| 0.261455263 | Metabolism               |
| 0.035749397 | Proliferation/Metastasis |
| 0.646819256 | Metabolism               |
| 0.138285439 | Metabolism               |
| 0.000138261 | Metabolism               |
| 0.07462411  | Metabolism               |
| 0.223737997 | Metabolism               |
| 0.063161198 | Metabolism               |
| 0.674616823 | Metabolism               |
| 0.289431025 | Metabolism               |
| 0.142062407 | TME                      |
| 0.023171021 | TME                      |
| 0.059231413 | TME                      |
| 0.139661807 | TME                      |
| 0.26464686  | TME                      |
| 0.019411196 | Metabolism               |
| 0.115216413 | Metabolism               |
| 0.07447531  | Proliferation/Metastasis |
| 0.013546417 | Metabolism               |
| 0.116761645 | Proliferation/Metastasis |
| 0.368061198 | Metabolism               |
| 0.538022532 | TME                      |
| 0.183580935 | Metabolism               |
| 0.753424358 | Metabolism               |
| 0.342157087 | Metabolism               |
| 0.861871254 | Metabolism               |
| 0.222866332 | TME                      |
| 0.439165809 | TME                      |
| 0.030952554 | Proliferation/Metastasis |
| 0.373339085 | Metabolism               |
| 0.264929197 | Proliferation/Metastasis |
| 0.572321608 | Proliferation/Metastasis |
| 0.035292018 | TME                      |
| 0.964707442 | TME                      |

|             |                          |
|-------------|--------------------------|
| 0.792298344 | TME                      |
| 0.899878976 | TME                      |
| 0.130988517 | Metabolism               |
| 0.822721828 | Proliferation/Metastasis |
| 0.856345953 | Metabolism               |
| 0.904888425 | Metabolism               |
| 0.385047975 | Proliferation/Metastasis |
| 0.48123528  | Proliferation/Metastasis |
| 0.196337311 | Metabolism               |
| 0.099674661 | Metabolism               |
| 0.704077855 | Metabolism               |
| 0.026485469 | Metabolism               |
| 0.557658122 | TME                      |
| 0.153327214 | TME                      |
| 0.784431081 | TME                      |
| 0.941311625 | TME                      |
| 0.058010005 | TME                      |
| 0.074787965 | Metabolism               |
| 0.980448703 | Metabolism               |
| 4.91E-05    | Metabolism               |
| 0.139102168 | Metabolism               |
| 0.288163741 | Metabolism               |
| 0.244005264 | TME                      |
| 0.134407626 | TME                      |
| 0.262053952 | TME                      |
| 0.732398388 | TME                      |
| 0.628561657 | TME                      |
| 0.709295526 | TME                      |
| 0.916461009 | TME                      |
| 0.399047208 | TME                      |
| 0.971056784 | TME                      |
| 0.32713058  | Proliferation/Metastasis |
| 0.192192659 | Proliferation/Metastasis |
| 0.032545645 | Metabolism               |
| 0.362835289 | Metabolism               |
| 0.188482523 | TME                      |
| 0.632282306 | Metabolism               |
| 0.378179317 | Metabolism               |
| 0.720928512 | TME                      |
| 0.551559868 | Proliferation/Metastasis |
| 0.517052801 | Proliferation/Metastasis |
| 0.086659535 | TME                      |
| 0.335312074 | Metabolism               |



|             |                          |
|-------------|--------------------------|
| 0.405495232 | Metabolism               |
| 0.418791561 | Proliferation/Metastasis |
| 0.490275613 | Proliferation/Metastasis |
| 0.696375421 | TME                      |
| 0.232550177 | TME                      |
| 0.413086866 | TME                      |
| 0.683298496 | TME                      |
| 0.02516573  | Proliferation/Metastasis |
| 0.451715661 | TME                      |
| 0.772627659 | TME                      |
| 0.606292583 | Metabolism               |
| 0.472877781 | TME                      |
| 0.414071436 | TME                      |
| 0.643808537 | TME                      |
| 0.204234263 | TME                      |
| 0.667802431 | Metabolism               |
| 0.019024296 | Metabolism               |
| 0.589358871 | Metabolism               |
| 0.171579033 | TME                      |
| 0.359553167 | Metabolism               |
| 0.078192267 | TME                      |
| 0.980368334 | TME                      |
| 0.508107686 | TME                      |
| 0.548409973 | TME                      |
| 0.777268215 | TME                      |
| 0.173378246 | Metabolism               |
| 0.584186053 | Proliferation/Metastasis |
| 0.690548209 | Metabolism               |
| 0.940879227 | Proliferation/Metastasis |
| 0.008428598 | Metabolism               |
| 0.693606831 | Metabolism               |
| 0.002737446 | Metabolism               |
| 0.042319207 | Metabolism               |
| 0.036823726 | Metabolism               |
| 0.115286175 | Metabolism               |
| 0.518019901 | Metabolism               |
| 0.001104176 | Metabolism               |
| 0.007273211 | Metabolism               |
| 0.494992164 | Metabolism               |
| 0.020041093 | Metabolism               |
| 0.022220536 | Metabolism               |
| 0.00784931  | Metabolism               |
| 0.00064125  | Metabolism               |

|             |                          |
|-------------|--------------------------|
| 0.696698848 | TME                      |
| 0.043329879 | Proliferation/Metastasis |
| 0.130855331 | Metabolism               |
| 0.127964502 | Proliferation/Metastasis |
| 0.741197239 | TME                      |
| 0.287334325 | Proliferation/Metastasis |
| 0.428627619 | Proliferation/Metastasis |
| 0.749643793 | TME                      |
| 0.280655936 | TME                      |
| 0.354832429 | Metabolism               |
| 0.561591606 | Metabolism               |
| 0.29564229  | Proliferation/Metastasis |
| 0.001636603 | Proliferation/Metastasis |
| 0.610762925 | Proliferation/Metastasis |
| 0.416447161 | Metabolism               |
| 0.067731158 | Metabolism               |
| 0.000408222 | Metabolism               |
| 0.068560968 | Proliferation/Metastasis |
| 0.995935322 | TME                      |
| 0.96193346  | TME                      |
| 0.037242934 | Metabolism               |
| 0.016293227 | Proliferation/Metastasis |
| 0.721685583 | Metabolism               |
| 0.985635376 | TME                      |
| 0.220963906 | TME                      |
| 0.282659629 | TME                      |
| 0.146753547 | TME                      |
| 0.347517388 | Metabolism               |
| 0.057231266 | TME                      |
| 0.386954582 | Proliferation/Metastasis |
| 0.653504321 | TME                      |
| 0.968794013 | Proliferation/Metastasis |
| 0.216985586 | Proliferation/Metastasis |
| 0.016123894 | Metabolism               |
| 0.685382965 | Proliferation/Metastasis |
| 0.80820817  | TME                      |
| 0.211183885 | Metabolism               |
| 0.671885262 | TME                      |
| 0.948189285 | TME                      |
| 0.366101499 | TME                      |
| 0.627837832 | TME                      |
| 0.366624103 | TME                      |
| 0.84838507  | TME                      |

|             |                          |
|-------------|--------------------------|
| 0.679618849 | Metabolism               |
| 0.461228993 | TME                      |
| 0.276938992 | Metabolism               |
| 0.122189942 | Metabolism               |
| 0.475431801 | Proliferation/Metastasis |
| 0.279624821 | Proliferation/Metastasis |
| 0.072324733 | Metabolism               |
| 0.007788395 | Metabolism               |
| 0.044126305 | Metabolism               |
| 0.135519245 | Metabolism               |
| 0.620849397 | Proliferation/Metastasis |
| 0.493562425 | Proliferation/Metastasis |
| 0.000465514 | Metabolism               |
| 0.019591465 | Metabolism               |
| 0.072835743 | Metabolism               |
| 0.033453604 | TME                      |
| 0.006675723 | Metabolism               |
| 0.300884868 | Metabolism               |
| 0.496285318 | Metabolism               |
| 0.432616916 | Metabolism               |
| 0.880509921 | Proliferation/Metastasis |
| 0.00821783  | Metabolism               |
| 0.315932144 | Metabolism               |
| 0.003726079 | Metabolism               |
| 0.946004033 | Metabolism               |
| 0.38923307  | Metabolism               |
| 0.00458449  | Metabolism               |
| 0.000120801 | Proliferation/Metastasis |
| 0.301495214 | Metabolism               |
| 0.210335989 | Metabolism               |
| 0.299046584 | Proliferation/Metastasis |
| 0.646782606 | Metabolism               |
| 0.563266835 | Metabolism               |
| 0.490841718 | Metabolism               |
| 0.057902447 | Metabolism               |
| 0.730530018 | Metabolism               |
| 0.028211956 | Metabolism               |
| 0.040423518 | Metabolism               |
| 0.019930557 | Metabolism               |
| 0.585287599 | TME                      |
| 0.357134776 | TME                      |
| 0.866615958 | TME                      |
| 0.915197362 | TME                      |

|             |                          |
|-------------|--------------------------|
| 0.642174715 | TME                      |
| 0.050675605 | Metabolism               |
| 0.069326681 | Metabolism               |
| 0.095708481 | Proliferation/Metastasis |
| 0.086706441 | Metabolism               |
| 0.227240181 | Proliferation/Metastasis |
| 0.482879268 | Metabolism               |
| 0.388019161 | TME                      |
| 0.199670467 | Metabolism               |
| 0.569119114 | Metabolism               |
| 0.937643609 | Metabolism               |
| 0.001161606 | Metabolism               |
| 0.318099176 | TME                      |
| 0.230110092 | TME                      |
| 0.006335354 | Proliferation/Metastasis |
| 0.756014231 | Metabolism               |
| 0.697008787 | Proliferation/Metastasis |
| 0.017759002 | Proliferation/Metastasis |
| 0.178951813 | TME                      |
| 0.073593711 | TME                      |
| 0.020688852 | TME                      |
| 0.007022385 | TME                      |
| 0.003913392 | Metabolism               |
| 0.018230486 | Proliferation/Metastasis |
| 0.016575988 | Metabolism               |
| 0.076481323 | Metabolism               |
| 0.241667768 | Proliferation/Metastasis |
| 0.003447679 | Proliferation/Metastasis |
| 0.010820984 | Metabolism               |
| 0.333941906 | Metabolism               |
| 0.169346756 | Metabolism               |
| 0.013036294 | Metabolism               |
| 0.039033491 | TME                      |
| 0.080372792 | TME                      |
| 0.000348056 | TME                      |
| 0.027649347 | TME                      |
| 0.873375942 | TME                      |
| 0.214619534 | Metabolism               |
| 0.344445825 | Metabolism               |
| 0.196389014 | Metabolism               |
| 0.816325049 | Metabolism               |
| 0.624287885 | Metabolism               |
| 0.004705686 | TME                      |

|             |                          |
|-------------|--------------------------|
| 0.0759892   | TME                      |
| 0.372792173 | TME                      |
| 0.000720143 | TME                      |
| 0.213330792 | TME                      |
| 0.045195649 | TME                      |
| 0.024588745 | TME                      |
| 0.079622622 | TME                      |
| 0.038557792 | TME                      |
| 0.061566814 | Proliferation/Metastasis |
| 0.004825369 | Proliferation/Metastasis |
| 0.760952307 | Metabolism               |
| 0.06185517  | Metabolism               |
| 0.669761512 | TME                      |
| 0.535663601 | Metabolism               |
| 0.004330127 | Metabolism               |
| 0.07098531  | TME                      |
| 0.002862265 | Proliferation/Metastasis |
| 0.772871148 | Proliferation/Metastasis |
| 0.003181171 | TME                      |
| 0.389694589 | Metabolism               |
| 0.959533701 | Metabolism               |
| 0.154959695 | Proliferation/Metastasis |
| 0.000240087 | Proliferation/Metastasis |
| 0.002316327 | TME                      |
| 0.060650554 | TME                      |
| 0.024104627 | TME                      |
| 0.015326695 | TME                      |
| 0.000232688 | Proliferation/Metastasis |
| 0.007698235 | TME                      |
| 0.161532579 | TME                      |
| 0.906913827 | Metabolism               |
| 0.000327572 | TME                      |
| 0.053617711 | TME                      |
| 0.197930748 | TME                      |
| 9.18E-05    | TME                      |
| 0.865042563 | Metabolism               |
| 0.532903804 | Metabolism               |
| 0.970264356 | Metabolism               |
| 0.01126822  | TME                      |
| 0.082174284 | Metabolism               |
| 0.026265408 | TME                      |
| 0.150486433 | TME                      |
| 0.030895388 | TME                      |

|             |                          |
|-------------|--------------------------|
| 0.873027692 | TME                      |
| 0.77626363  | TME                      |
| 0.202594777 | Metabolism               |
| 0.036690691 | Proliferation/Metastasis |
| 0.708288072 | Metabolism               |
| 0.000460907 | Proliferation/Metastasis |
| 0.233368876 | Metabolism               |
| 0.767109542 | Metabolism               |
| 0.066265909 | Metabolism               |
| 0.755081409 | Metabolism               |
| 0.4671536   | Metabolism               |
| 0.216950072 | Metabolism               |
| 0.772298769 | Metabolism               |
| 0.076715958 | Metabolism               |
| 0.217674674 | Metabolism               |
| 0.754930679 | Metabolism               |
| 0.868737258 | Metabolism               |
| 0.342816516 | Metabolism               |
| 0.237303128 | Metabolism               |
| 0.888771199 | Metabolism               |
| 0.05764256  | TME                      |
| 0.215471962 | Proliferation/Metastasis |
| 0.221400583 | Metabolism               |
| 0.184546752 | Proliferation/Metastasis |
| 0.003861104 | TME                      |
| 0.005458253 | Proliferation/Metastasis |
| 0.01524729  | Proliferation/Metastasis |
| 0.078495012 | TME                      |
| 0.506799544 | TME                      |
| 0.004326175 | Metabolism               |
| 3.70E-07    | Metabolism               |
| 0.043694472 | Proliferation/Metastasis |
| 0.065303257 | Proliferation/Metastasis |
| 0.001981821 | Proliferation/Metastasis |
| 0.003220481 | Metabolism               |
| 0.674670605 | Metabolism               |
| 0.710499661 | Metabolism               |
| 0.17311404  | Proliferation/Metastasis |
| 0.009026613 | TME                      |
| 0.055975391 | TME                      |
| 0.00017311  | Metabolism               |
| 0.004196878 | Proliferation/Metastasis |
| 1.35E-08    | Metabolism               |

|             |                          |
|-------------|--------------------------|
| 0.000132884 | TME                      |
| 8.21E-05    | TME                      |
| 0.1163829   | TME                      |
| 0.00867154  | TME                      |
| 0.981214337 | Metabolism               |
| 0.776633437 | TME                      |
| 2.24E-08    | Proliferation/Metastasis |
| 0.140592255 | TME                      |
| 0.001567103 | Proliferation/Metastasis |
| 0.006104179 | Proliferation/Metastasis |
| 0.114144963 | Metabolism               |
| 0.16755207  | Proliferation/Metastasis |
| 0.022672416 | TME                      |
| 0.170183237 | Metabolism               |
| 0.115939343 | TME                      |
| 0.012882362 | TME                      |
| 0.172240218 | TME                      |
| 0.083284589 | TME                      |
| 0.055989104 | TME                      |
| 0.011692173 | TME                      |
| 0.145045258 | Metabolism               |
| 0.196889238 | TME                      |
| 0.058151018 | Metabolism               |
| 0.038037782 | Metabolism               |
| 0.00012856  | Proliferation/Metastasis |
| 0.695519077 | Proliferation/Metastasis |
| 0.453342896 | Metabolism               |
| 0.256718246 | Metabolism               |
| 8.28E-05    | Metabolism               |
| 0.003351039 | Metabolism               |
| 0.554644912 | Proliferation/Metastasis |
| 0.000370333 | Proliferation/Metastasis |
| 0.011764088 | Metabolism               |
| 0.001051208 | Metabolism               |
| 0.821536566 | Metabolism               |
| 0.23281892  | TME                      |
| 0.521065407 | Metabolism               |
| 0.050129822 | Metabolism               |
| 0.379244929 | Metabolism               |
| 0.000102645 | Metabolism               |
| 3.43E-05    | Proliferation/Metastasis |
| 0.173444947 | Metabolism               |
| 0.511736042 | Metabolism               |

|             |                          |
|-------------|--------------------------|
| 0.463683871 | Metabolism               |
| 0.012924922 | Metabolism               |
| 0.427310301 | Metabolism               |
| 0.752703607 | Metabolism               |
| 0.337506363 | Proliferation/Metastasis |
| 0.264896649 | Metabolism               |
| 0.008582362 | Metabolism               |
| 0.234647762 | Proliferation/Metastasis |
| 0.000590995 | Metabolism               |
| 9.21E-06    | Metabolism               |
| 0.00450372  | Metabolism               |
| 0.006756331 | Metabolism               |
| 0.051877672 | Metabolism               |
| 0.974982797 | Metabolism               |
| 0.000464134 | Metabolism               |
| 0.658215631 | Metabolism               |
| 0.006579252 | TME                      |
| 0.027265626 | TME                      |
| 0.022378177 | TME                      |
| 0.096354888 | TME                      |
| 0.403347741 | TME                      |
| 0.496720376 | Metabolism               |
| 0.667448573 | Metabolism               |
| 9.48E-05    | Proliferation/Metastasis |
| 0.871165834 | Metabolism               |
| 0.048551991 | Proliferation/Metastasis |
| 0.388717642 | Metabolism               |
| 0.451403553 | TME                      |
| 0.766654603 | Metabolism               |
| 0.029853729 | Metabolism               |
| 0.431136887 | Metabolism               |
| 0.98048608  | Metabolism               |
| 0.183252711 | TME                      |
| 0.575571213 | TME                      |
| 0.099826402 | Proliferation/Metastasis |
| 0.09963881  | Metabolism               |
| 0.097282901 | Proliferation/Metastasis |
| 0.50663301  | Proliferation/Metastasis |
| 0.113388896 | TME                      |
| 2.72E-06    | TME                      |
| 0.000220449 | TME                      |
| 2.45E-09    | TME                      |
| 0.306321721 | Metabolism               |



|             |                          |
|-------------|--------------------------|
| 0.012955241 | Proliferation/Metastasis |
| 0.007600311 | Metabolism               |
| 0.059435641 | Metabolism               |
| 0.207891223 | Proliferation/Metastasis |
| 2.13E-05    | Proliferation/Metastasis |
| 0.619027172 | Metabolism               |
| 0.991556299 | Metabolism               |
| 0.000388809 | Metabolism               |
| 0.117847642 | Metabolism               |
| 0.021048296 | TME                      |
| 0.001129472 | TME                      |
| 0.005453873 | TME                      |
| 0.000390455 | TME                      |
| 9.58E-10    | TME                      |
| 0.388635034 | Metabolism               |
| 0.019244067 | Metabolism               |
| 0.001547401 | Metabolism               |
| 9.03E-08    | Metabolism               |
| 0.160078938 | Metabolism               |
| 0.007823897 | TME                      |
| 0.06250052  | TME                      |
| 0.000841543 | TME                      |
| 6.48E-05    | TME                      |
| 1.78E-06    | TME                      |
| 6.65E-05    | TME                      |
| 4.13E-05    | TME                      |
| 0.001770916 | TME                      |
| 1.46E-06    | TME                      |
| 0.000992611 | Proliferation/Metastasis |
| 0.632778363 | Proliferation/Metastasis |
| 2.10E-06    | Metabolism               |
| 0.899523702 | Metabolism               |
| 0.026925149 | TME                      |
| 0.503265864 | Metabolism               |
| 3.67E-05    | Metabolism               |
| 1.16E-05    | TME                      |
| 0.146415979 | Proliferation/Metastasis |
| 8.27E-05    | Proliferation/Metastasis |
| 0.000359692 | TME                      |
| 0.138983198 | Metabolism               |
| 0.242708238 | Metabolism               |
| 1.21E-05    | Proliferation/Metastasis |
| 0.007752891 | Proliferation/Metastasis |

|             |                          |
|-------------|--------------------------|
| 0.001317565 | TME                      |
| 4.21E-06    | TME                      |
| 5.83E-05    | TME                      |
| 1.51E-05    | TME                      |
| 0.719950665 | Proliferation/Metastasis |
| 0.000100546 | TME                      |
| 6.57E-05    | TME                      |
| 0.003432949 | Metabolism               |
| 6.11E-06    | TME                      |
| 4.37E-06    | TME                      |
| 0.000153904 | TME                      |
| 0.014168503 | TME                      |
| 2.18E-05    | Metabolism               |
| 2.30E-07    | Metabolism               |
| 2.56E-05    | Metabolism               |
| 3.89E-07    | TME                      |
| 0.000320553 | Metabolism               |
| 0.101392582 | TME                      |
| 0.001347342 | TME                      |
| 4.96E-08    | TME                      |
| 0.000428088 | TME                      |
| 1.86E-05    | TME                      |
| 0.038064334 | Metabolism               |
| 4.72E-05    | Proliferation/Metastasis |
| 0.134823533 | Metabolism               |
| 0.091170602 | Proliferation/Metastasis |
| 0.280409112 | Metabolism               |
| 0.197615814 | Metabolism               |
| 0.256842162 | Metabolism               |
| 0.681198606 | Metabolism               |
| 0.24010595  | Metabolism               |
| 0.000253081 | Metabolism               |
| 0.001027092 | Metabolism               |
| 0.578186266 | Metabolism               |
| 0.012093324 | Metabolism               |
| 0.320712927 | Metabolism               |
| 0.491853822 | Metabolism               |
| 0.396147879 | Metabolism               |
| 2.18E-06    | Metabolism               |
| 0.008163845 | Metabolism               |
| 3.95E-06    | TME                      |
| 0.960525469 | Proliferation/Metastasis |
| 0.621657478 | Metabolism               |

|             |                          |
|-------------|--------------------------|
| 0.005631413 | Proliferation/Metastasis |
| 0.000250176 | TME                      |
| 0.000234002 | Proliferation/Metastasis |
| 3.30E-06    | Proliferation/Metastasis |
| 0.000168493 | TME                      |
| 0.008411767 | TME                      |
| 0.001664264 | Metabolism               |
| 0.026756556 | Metabolism               |
| 0.000727825 | Proliferation/Metastasis |
| 0.630531157 | Proliferation/Metastasis |
| 0.008278845 | Proliferation/Metastasis |
| 0.001496222 | Metabolism               |
| 0.00164148  | Metabolism               |
| 0.018715286 | Metabolism               |
| 0.061071402 | Proliferation/Metastasis |
| 0.000104427 | TME                      |
| 2.94E-05    | TME                      |
| 0.229435927 | Metabolism               |
| 0.003304543 | Proliferation/Metastasis |
| 0.479144356 | Metabolism               |
| 0.011733452 | TME                      |
| 0.001907333 | TME                      |
| 2.68E-12    | TME                      |
| 0.002567344 | TME                      |
| 0.142328542 | Metabolism               |
| 0.449608414 | TME                      |
| 0.001489655 | Proliferation/Metastasis |
| 1.72E-06    | TME                      |
| 0.148117494 | Proliferation/Metastasis |
| 0.034707284 | Proliferation/Metastasis |
| 0.011814667 | Metabolism               |
| 0.003987011 | Proliferation/Metastasis |
| 0.000305976 | TME                      |
| 0.00097356  | Metabolism               |
| 0.04694005  | TME                      |
| 0.037104963 | TME                      |
| 0.750924084 | TME                      |
| 0.001297724 | TME                      |
| 0.000782096 | TME                      |
| 1.44E-05    | TME                      |
| 3.88E-05    | Metabolism               |
| 2.33E-05    | TME                      |
| 0.014705003 | Metabolism               |

|             |                          |
|-------------|--------------------------|
| 2.74E-06    | Metabolism               |
| 0.000191502 | Proliferation/Metastasis |
| 0.376766092 | Proliferation/Metastasis |
| 0.047213278 | Metabolism               |
| 0.000444046 | Metabolism               |
| 0.284154667 | Metabolism               |
| 1.12E-10    | Metabolism               |
| 0.007744589 | Proliferation/Metastasis |
| 9.58E-05    | Proliferation/Metastasis |
| 0.226180247 | Metabolism               |
| 0.48520945  | Metabolism               |
| 0.079486306 | Metabolism               |
| 0.000187457 | TME                      |
| 0.877960958 | Metabolism               |
| 5.51E-05    | Metabolism               |
| 0.004473362 | Metabolism               |
| 0.471517423 | Metabolism               |
| 0.002360324 | Proliferation/Metastasis |
| 0.003723342 | Metabolism               |
| 0.010079638 | Metabolism               |
| 1.72E-07    | Metabolism               |
| 0.03816303  | Metabolism               |
| 0.003875842 | Metabolism               |
| 9.16E-06    | Metabolism               |
| 7.73E-06    | Proliferation/Metastasis |
| 2.74E-07    | Metabolism               |
| 0.45905104  | Metabolism               |
| 0.440720057 | Proliferation/Metastasis |
| 0.32877954  | Metabolism               |
| 0.127560013 | Metabolism               |
| 0.036274274 | Metabolism               |
| 0.167628979 | Metabolism               |
| 0.000164182 | Metabolism               |
| 2.34E-05    | Metabolism               |
| 0.100608838 | Metabolism               |
| 0.00109163  | Metabolism               |
| 5.61E-05    | TME                      |
| 0.000672921 | TME                      |
| 4.42E-05    | TME                      |
| 6.60E-06    | TME                      |
| 0.021707181 | TME                      |
| 0.161936615 | Metabolism               |
| 0.0707825   | Metabolism               |

|             |                          |
|-------------|--------------------------|
| 0.504139095 | Proliferation/Metastasis |
| 0.538760944 | Metabolism               |
| 0.002930035 | Proliferation/Metastasis |
| 0.012657413 | Metabolism               |
| 0.00084167  | TME                      |
| 0.610038859 | Metabolism               |
| 0.001032685 | Metabolism               |
| 0.752635542 | Metabolism               |
| 4.15E-06    | Metabolism               |
| 0.459499767 | TME                      |
| 0.10790689  | TME                      |
| 0.042314459 | Proliferation/Metastasis |
| 0.622152521 | Metabolism               |
| 5.75E-05    | Proliferation/Metastasis |
| 0.061736659 | Proliferation/Metastasis |
| 0.671113018 | TME                      |
| 0.608014179 | TME                      |
| 0.315930298 | TME                      |
| 0.133725065 | TME                      |
| 0.039137252 | Metabolism               |
| 0.951716499 | Proliferation/Metastasis |
| 0.062638147 | Metabolism               |
| 0.786962195 | Metabolism               |
| 0.525277341 | Proliferation/Metastasis |
| 0.078847669 | Proliferation/Metastasis |
| 0.021895952 | Metabolism               |
| 0.000321448 | Metabolism               |
| 0.35829422  | Metabolism               |
| 0.026668443 | Metabolism               |
| 0.62710641  | TME                      |
| 0.732379848 | TME                      |
| 0.086847349 | TME                      |
| 0.277474927 | TME                      |
| 0.915792231 | TME                      |
| 0.071881293 | Metabolism               |
| 0.507499214 | Metabolism               |
| 0.935272876 | Metabolism               |
| 0.286015977 | Metabolism               |
| 0.000319695 | Metabolism               |
| 0.590505398 | TME                      |
| 0.466241919 | TME                      |
| 0.720411619 | TME                      |
| 0.166515862 | TME                      |

|             |                          |
|-------------|--------------------------|
| 0.209599788 | TME                      |
| 0.587941256 | TME                      |
| 0.457879535 | TME                      |
| 0.704703448 | TME                      |
| 0.490193589 | TME                      |
| 0.177807982 | Proliferation/Metastasis |
| 0.004126602 | Proliferation/Metastasis |
| 0.477689868 | Metabolism               |
| 0.05264252  | Metabolism               |
| 0.782496809 | TME                      |
| 0.049854244 | Metabolism               |
| 0.108526145 | Metabolism               |
| 0.643927848 | TME                      |
| 0.284034231 | Proliferation/Metastasis |
| 0.598220746 | Proliferation/Metastasis |
| 0.737435861 | TME                      |
| 0.950543591 | Metabolism               |
| 0.253293119 | Metabolism               |
| 0.251586484 | Proliferation/Metastasis |
| 0.448120934 | Proliferation/Metastasis |
| 0.672891984 | TME                      |
| 0.401435742 | TME                      |
| 0.697174728 | TME                      |
| 0.103675468 | TME                      |
| 0.001661091 | Proliferation/Metastasis |
| 0.730976802 | TME                      |
| 0.51028226  | TME                      |
| 0.09630722  | Metabolism               |
| 0.138401003 | TME                      |
| 0.38055595  | TME                      |
| 0.698485491 | TME                      |
| 0.192951295 | TME                      |
| 0.904998699 | Metabolism               |
| 0.300560194 | Metabolism               |
| 0.757026215 | Metabolism               |
| 0.635950872 | TME                      |
| 0.610237733 | Metabolism               |
| 0.203200361 | TME                      |
| 0.616525003 | TME                      |
| 0.345880659 | TME                      |
| 0.777887588 | TME                      |
| 0.199495716 | TME                      |
| 0.396739334 | Metabolism               |

|             |                          |
|-------------|--------------------------|
| 0.216715181 | Proliferation/Metastasis |
| 0.037014914 | Metabolism               |
| 0.077918091 | Proliferation/Metastasis |
| 0.035525206 | Metabolism               |
| 0.029875738 | Metabolism               |
| 0.001338262 | Metabolism               |
| 3.08E-07    | Metabolism               |
| 0.174314079 | Metabolism               |
| 0.412270404 | Metabolism               |
| 0.029461432 | Metabolism               |
| 0.73577629  | Metabolism               |
| 0.759627082 | Metabolism               |
| 0.487741814 | Metabolism               |
| 0.641600375 | Metabolism               |
| 0.913827244 | Metabolism               |
| 0.966959549 | Metabolism               |
| 0.003850269 | Metabolism               |
| 0.38911939  | TME                      |
| 0.633009806 | Proliferation/Metastasis |
| 0.016533209 | Metabolism               |
| 0.54526057  | Proliferation/Metastasis |
| 0.308334767 | TME                      |
| 0.220783406 | Proliferation/Metastasis |
| 0.449641713 | Proliferation/Metastasis |
| 0.33613377  | TME                      |
| 0.238739407 | TME                      |
| 0.182579781 | Metabolism               |
| 0.024682627 | Metabolism               |
| 0.02009619  | Proliferation/Metastasis |
| 0.909297982 | Proliferation/Metastasis |
| 0.077189348 | Proliferation/Metastasis |
| 0.00453933  | Metabolism               |
| 0.749604698 | Metabolism               |
| 0.01400813  | Metabolism               |
| 0.149877107 | Proliferation/Metastasis |
| 0.246434988 | TME                      |
| 0.633316833 | TME                      |
| 0.313220359 | Metabolism               |
| 0.464476868 | Proliferation/Metastasis |
| 0.119598799 | Metabolism               |
| 0.093830527 | TME                      |
| 0.914173341 | TME                      |
| 0.576165628 | TME                      |

|             |                          |
|-------------|--------------------------|
| 0.896831817 | TME                      |
| 0.685350002 | Metabolism               |
| 0.204946632 | TME                      |
| 0.007318206 | Proliferation/Metastasis |
| 0.376743883 | TME                      |
| 0.156760139 | Proliferation/Metastasis |
| 0.002510444 | Proliferation/Metastasis |
| 0.528720682 | Metabolism               |
| 0.814434985 | Proliferation/Metastasis |
| 0.509155398 | TME                      |
| 0.940333748 | Metabolism               |
| 0.985127473 | TME                      |
| 0.59464704  | TME                      |
| 0.784939932 | TME                      |
| 0.408346917 | TME                      |
| 0.900619269 | TME                      |
| 0.216306867 | TME                      |
| 0.416218626 | Metabolism               |
| 0.37528486  | TME                      |
| 0.103839681 | Metabolism               |
| 0.725129167 | Metabolism               |
| 0.269191978 | Proliferation/Metastasis |
| 0.335161027 | Proliferation/Metastasis |
| 2.48E-05    | Metabolism               |
| 0.692697365 | Metabolism               |
| 0.100871544 | Metabolism               |
| 0.497939175 | Metabolism               |
| 0.381569592 | Proliferation/Metastasis |
| 0.200293899 | Proliferation/Metastasis |
| 0.1289057   | Metabolism               |
| 0.068957268 | Metabolism               |
| 0.472490654 | Metabolism               |
| 0.393957194 | TME                      |
| 0.390763246 | Metabolism               |
| 0.078627997 | Metabolism               |
| 0.903195769 | Metabolism               |
| 0.016634426 | Metabolism               |
| 0.055424916 | Proliferation/Metastasis |
| 0.583579294 | Metabolism               |
| 0.213901674 | Metabolism               |
| 0.102346936 | Metabolism               |
| 0.482877747 | Metabolism               |
| 0.947447175 | Metabolism               |



|             |                          |
|-------------|--------------------------|
| 0.208498692 | Metabolism               |
| 0.492135321 | Proliferation/Metastasis |
| 0.120875637 | Metabolism               |
| 0.2464053   | Metabolism               |
| 0.017892118 | Proliferation/Metastasis |
| 0.106423476 | Metabolism               |
| 0.114218792 | Metabolism               |
| 0.008686374 | Metabolism               |
| 0.000631006 | Metabolism               |
| 0.186646319 | Metabolism               |
| 0.0198655   | Metabolism               |
| 0.009161275 | Metabolism               |
| 0.121970354 | Metabolism               |
| 0.207708732 | TME                      |
| 0.222672061 | TME                      |
| 0.138281971 | TME                      |
| 0.257619371 | TME                      |
| 0.834749553 | TME                      |
| 0.861370057 | Metabolism               |
| 0.018480955 | Metabolism               |
| 0.91164396  | Proliferation/Metastasis |
| 0.329559669 | Metabolism               |
| 0.64337904  | Proliferation/Metastasis |
| 0.042629753 | Metabolism               |
| 0.406653985 | TME                      |
| 0.670933203 | Metabolism               |
| 0.995673237 | Metabolism               |
| 0.086135389 | Metabolism               |
| 0.077655897 | Metabolism               |
| 0.499765264 | TME                      |
| 0.441712686 | TME                      |
| 0.087273335 | Proliferation/Metastasis |
| 0.006064206 | Metabolism               |
| 0.650053537 | Proliferation/Metastasis |
| 0.104842666 | Proliferation/Metastasis |
| 0.36105789  | TME                      |
| 0.314426144 | TME                      |
| 0.309450392 | TME                      |
| 0.079318177 | TME                      |
| 0.021351055 | Metabolism               |
| 0.162108097 | Proliferation/Metastasis |
| 0.000306655 | Metabolism               |
| 0.860414251 | Metabolism               |

|             |                          |
|-------------|--------------------------|
| 0.038252571 | Proliferation/Metastasis |
| 0.423763759 | Proliferation/Metastasis |
| 0.020499812 | Metabolism               |
| 0.075798097 | Metabolism               |
| 0.059942937 | Metabolism               |
| 8.35E-05    | Metabolism               |
| 0.771812566 | TME                      |
| 0.162610849 | TME                      |
| 0.133382135 | TME                      |
| 0.196441682 | TME                      |
| 0.76385427  | TME                      |
| 0.002381602 | Metabolism               |
| 0.021202573 | Metabolism               |
| 0.819426942 | Metabolism               |
| 0.653934791 | Metabolism               |
| 0.002647211 | Metabolism               |
| 0.726783771 | TME                      |
| 0.096675985 | TME                      |
| 0.881847935 | TME                      |
| 0.092044263 | TME                      |
| 0.10999008  | TME                      |
| 0.277892669 | TME                      |
| 0.176634306 | TME                      |
| 0.406155063 | TME                      |
| 0.088358231 | TME                      |
| 0.430720246 | Proliferation/Metastasis |
| 0.096847111 | Proliferation/Metastasis |
| 0.463017063 | Metabolism               |
| 0.068611846 | Metabolism               |
| 0.756629506 | TME                      |
| 0.410299166 | Metabolism               |
| 0.065692419 | Metabolism               |
| 0.387513784 | TME                      |
| 0.126240466 | Proliferation/Metastasis |
| 0.783033209 | Proliferation/Metastasis |
| 0.850945003 | TME                      |
| 0.143321395 | Metabolism               |
| 0.713970983 | Metabolism               |
| 0.476269846 | Proliferation/Metastasis |
| 0.743070682 | Proliferation/Metastasis |
| 0.153163812 | TME                      |
| 0.413663379 | TME                      |
| 0.54541051  | TME                      |

|             |                          |
|-------------|--------------------------|
| 0.094823604 | TME                      |
| 0.006821081 | Proliferation/Metastasis |
| 0.430619433 | TME                      |
| 0.555940535 | TME                      |
| 0.049822442 | Metabolism               |
| 0.854899496 | TME                      |
| 0.965146325 | TME                      |
| 0.723705098 | TME                      |
| 8.03E-05    | TME                      |
| 0.002344518 | Metabolism               |
| 0.661232744 | Metabolism               |
| 0.215034832 | Metabolism               |
| 0.85572808  | TME                      |
| 0.246626292 | Metabolism               |
| 0.82470299  | TME                      |
| 0.063773093 | TME                      |
| 0.465376864 | TME                      |
| 0.48471423  | TME                      |
| 0.182388433 | TME                      |
| 0.529394156 | Metabolism               |
| 0.308760947 | Proliferation/Metastasis |
| 0.789320813 | Metabolism               |
| 0.002292618 | Proliferation/Metastasis |
| 0.157685666 | Metabolism               |
| 0.095088031 | Metabolism               |
| 0.000710346 | Metabolism               |
| 0.105703312 | Metabolism               |
| 0.818799408 | Metabolism               |
| 0.233631836 | Metabolism               |
| 0.66425226  | Metabolism               |
| 0.00022397  | Metabolism               |
| 0.118694863 | Metabolism               |
| 0.000674861 | Metabolism               |
| 0.011013734 | Metabolism               |
| 0.315347992 | Metabolism               |
| 0.099856338 | Metabolism               |
| 0.175845033 | Metabolism               |
| 0.456050119 | TME                      |
| 0.302783632 | Proliferation/Metastasis |
| 0.000155934 | Metabolism               |
| 0.05691987  | Proliferation/Metastasis |
| 0.215380667 | TME                      |
| 0.24554605  | Proliferation/Metastasis |

|             |                          |
|-------------|--------------------------|
| 0.258102788 | Proliferation/Metastasis |
| 0.724926705 | TME                      |
| 0.441034351 | TME                      |
| 0.791484324 | Metabolism               |
| 0.002760968 | Metabolism               |
| 0.393851169 | Proliferation/Metastasis |
| 0.000218978 | Proliferation/Metastasis |
| 0.322555534 | Proliferation/Metastasis |
| 0.001316896 | Metabolism               |
| 0.178500671 | Metabolism               |
| 0.044258452 | Metabolism               |
| 0.809228624 | Proliferation/Metastasis |
| 0.322354993 | TME                      |
| 0.163191252 | TME                      |
| 0.613355383 | Metabolism               |
| 0.784750006 | Proliferation/Metastasis |
| 0.308180291 | Metabolism               |
| 0.008851364 | TME                      |
| 0.305925955 | TME                      |
| 0.929326748 | TME                      |
| 0.76231204  | TME                      |
| 0.714675902 | Metabolism               |
| 0.247882332 | TME                      |
| 0.000151823 | Proliferation/Metastasis |
| 0.464238748 | TME                      |
| 0.912056456 | Proliferation/Metastasis |
| 0.475359994 | Proliferation/Metastasis |
| 0.202509066 | Metabolism               |
| 0.506824101 | Proliferation/Metastasis |
| 0.302233831 | TME                      |
| 0.203602908 | Metabolism               |
| 0.829774179 | TME                      |
| 0.573224571 | TME                      |
| 0.728845891 | TME                      |
| 0.513861692 | TME                      |
| 0.170959639 | TME                      |
| 0.13485368  | TME                      |
| 0.720279968 | Metabolism               |
| 0.642583403 | TME                      |
| 0.321663494 | Metabolism               |
| 0.735020599 | Metabolism               |
| 0.074041538 | Proliferation/Metastasis |
| 0.739970892 | Proliferation/Metastasis |

|             |                          |
|-------------|--------------------------|
| 0.012519581 | Metabolism               |
| 0.767403553 | Metabolism               |
| 0.031203472 | Metabolism               |
| 0.009199602 | Metabolism               |
| 0.977534941 | Proliferation/Metastasis |
| 0.481442382 | Proliferation/Metastasis |
| 0.039938194 | Metabolism               |
| 0.000104359 | Metabolism               |
| 0.525752043 | Metabolism               |
| 0.105831042 | TME                      |
| 0.199438411 | Metabolism               |
| 0.009154581 | Metabolism               |
| 0.199639472 | Metabolism               |
| 0.004301652 | Metabolism               |
| 0.230948373 | Proliferation/Metastasis |
| 0.600115089 | Metabolism               |
| 0.434587829 | Metabolism               |
| 0.571930002 | Metabolism               |
| 0.129249217 | Metabolism               |
| 0.929852268 | Metabolism               |
| 0.544018512 | Metabolism               |
| 0.196930527 | Proliferation/Metastasis |
| 0.001124102 | Metabolism               |
| 0.994003564 | Metabolism               |
| 0.075551914 | Proliferation/Metastasis |
| 0.000123066 | Metabolism               |
| 0.137143051 | Metabolism               |
| 0.298341402 | Metabolism               |
| 0.794656374 | Metabolism               |
| 0.000103479 | Metabolism               |
| 0.001007264 | Metabolism               |
| 0.001993446 | Metabolism               |
| 0.88572544  | Metabolism               |
| 0.107750027 | TME                      |
| 0.251715288 | TME                      |
| 0.312295803 | TME                      |
| 0.079741356 | TME                      |
| 0.155410158 | TME                      |
| 0.000267146 | Metabolism               |
| 0.623725479 | Metabolism               |
| 0.494895667 | Proliferation/Metastasis |
| 0.03735671  | Metabolism               |
| 0.888769401 | Proliferation/Metastasis |

|             |                          |
|-------------|--------------------------|
| 0.611401596 | Metabolism               |
| 0.818780058 | TME                      |
| 0.188755883 | Metabolism               |
| 0.896105591 | Metabolism               |
| 0.022429165 | Metabolism               |
| 0.487879197 | Metabolism               |
| 0.643889326 | TME                      |
| 0.845803455 | TME                      |
| 0.168631452 | Proliferation/Metastasis |
| 0.757918985 | Metabolism               |
| 0.189735258 | Proliferation/Metastasis |
| 0.187599944 | Proliferation/Metastasis |
| 0.471949995 | TME                      |
| 0.006602273 | TME                      |
| 0.00690366  | TME                      |
| 0.004566677 | TME                      |
| 0.262800539 | Metabolism               |
| 0.008048157 | Proliferation/Metastasis |
| 0.570712744 | Metabolism               |
| 0.028663532 | Metabolism               |
| 0.591311524 | Proliferation/Metastasis |
| 0.12242519  | Proliferation/Metastasis |
| 0.067206078 | Metabolism               |
| 0.086594558 | Metabolism               |
| 0.101021954 | Metabolism               |
| 0.001279477 | Metabolism               |
| 0.090478618 | TME                      |
| 0.055438155 | TME                      |
| 0.202821575 | TME                      |
| 0.014855523 | TME                      |
| 0.000644083 | TME                      |
| 0.156746374 | Metabolism               |
| 0.607753626 | Metabolism               |
| 0.537381391 | Metabolism               |
| 0.009875704 | Metabolism               |
| 0.926292883 | Metabolism               |
| 0.10849134  | TME                      |
| 0.041433086 | TME                      |
| 0.010405457 | TME                      |
| 0.045264773 | TME                      |
| 0.000772081 | TME                      |
| 0.009684902 | TME                      |
| 0.008114674 | TME                      |

|             |                          |
|-------------|--------------------------|
| 0.098169516 | TME                      |
| 0.005899211 | TME                      |
| 0.350055186 | Proliferation/Metastasis |
| 0.702598146 | Proliferation/Metastasis |
| 0.065128009 | Metabolism               |
| 0.154847969 | Metabolism               |
| 0.49403776  | TME                      |
| 0.206492876 | Metabolism               |
| 0.04129317  | Metabolism               |
| 0.01113263  | TME                      |
| 0.27924439  | Proliferation/Metastasis |
| 0.045015031 | Proliferation/Metastasis |
| 0.093904689 | TME                      |
| 0.142614378 | Metabolism               |
| 0.767355769 | Metabolism               |
| 0.221338978 | Proliferation/Metastasis |
| 0.149349935 | Proliferation/Metastasis |
| 0.032771215 | TME                      |
| 0.011985893 | TME                      |
| 0.002186914 | TME                      |
| 0.010121258 | TME                      |
| 0.323689329 | Proliferation/Metastasis |
| 0.011759953 | TME                      |
| 0.003314658 | TME                      |
| 0.584442304 | Metabolism               |
| 0.025941365 | TME                      |
| 0.005558296 | TME                      |
| 0.007273725 | TME                      |
| 0.297975559 | TME                      |
| 0.068010595 | Metabolism               |
| 0.03845434  | Metabolism               |
| 0.115625669 | Metabolism               |
| 0.003452347 | TME                      |
| 0.86444121  | Metabolism               |
| 0.412073336 | TME                      |
| 0.024560114 | TME                      |
| 0.013410456 | TME                      |
| 0.009325874 | TME                      |
| 0.008308553 | TME                      |
| 0.546822567 | Metabolism               |
| 0.24134328  | Proliferation/Metastasis |
| 0.363618162 | Metabolism               |
| 0.722956891 | Proliferation/Metastasis |

|             |                          |
|-------------|--------------------------|
| 0.612580907 | Metabolism               |
| 0.733995422 | Metabolism               |
| 0.960903003 | Metabolism               |
| 0.114654025 | Metabolism               |
| 0.43111999  | Metabolism               |
| 0.001501471 | Metabolism               |
| 0.055388134 | Metabolism               |
| 0.014668655 | Metabolism               |
| 0.210097554 | Metabolism               |
| 0.002437518 | Metabolism               |
| 0.096890155 | Metabolism               |
| 0.351910838 | Metabolism               |
| 0.297231481 | Metabolism               |
| 0.226132753 | Metabolism               |
| 0.006053736 | TME                      |
| 0.568847679 | Proliferation/Metastasis |
| 0.219790666 | Metabolism               |
| 0.072557953 | Proliferation/Metastasis |
| 0.103040796 | TME                      |
| 0.067998932 | Proliferation/Metastasis |
| 0.015246864 | Proliferation/Metastasis |
| 1.07E-05    | TME                      |
| 0.02813719  | TME                      |
| 0.150210196 | Metabolism               |
| 0.737424872 | Metabolism               |
| 0.044290272 | Proliferation/Metastasis |
| 0.715603498 | Proliferation/Metastasis |
| 0.030552097 | Proliferation/Metastasis |
| 0.878897211 | Metabolism               |
| 0.004527124 | Metabolism               |
| 0.06237206  | Metabolism               |
| 0.599574063 | Proliferation/Metastasis |
| 0.032020481 | TME                      |
| 0.011023101 | TME                      |
| 0.404531657 | Metabolism               |
| 0.308998569 | Proliferation/Metastasis |
| 0.230710753 | Metabolism               |
| 0.855396236 | TME                      |
| 0.11898774  | TME                      |
| 0.000406368 | TME                      |
| 0.028302638 | TME                      |
| 0.223686358 | Metabolism               |
| 0.064245368 | TME                      |



|             |                          |
|-------------|--------------------------|
| 0.594494869 | Proliferation/Metastasis |
| 0.00178508  | TME                      |
| 0.105069041 | Proliferation/Metastasis |
| 0.489132126 | Proliferation/Metastasis |
| 0.818861262 | Metabolism               |
| 0.353630281 | Proliferation/Metastasis |
| 0.022001996 | TME                      |
| 0.46716212  | Metabolism               |
| 0.516651473 | TME                      |
| 0.047289559 | TME                      |
| 0.861892845 | TME                      |
| 0.120879088 | TME                      |
| 0.023508555 | TME                      |
| 0.003159372 | TME                      |
| 0.236321238 | Metabolism               |
| 0.003598804 | TME                      |
| 0.224458774 | Metabolism               |
| 0.138901069 | Metabolism               |
| 0.243989541 | Proliferation/Metastasis |
| 0.516979105 | Proliferation/Metastasis |
| 0.183662814 | Metabolism               |
| 0.346102448 | Metabolism               |
| 0.002732773 | Metabolism               |
| 0.105104197 | Metabolism               |
| 0.121295887 | Proliferation/Metastasis |
| 0.974077081 | Proliferation/Metastasis |
| 0.845854559 | Metabolism               |
| 0.011972503 | Metabolism               |
| 0.680793498 | Metabolism               |
| 0.00757722  | TME                      |
| 0.330543192 | Metabolism               |
| 0.248171804 | Metabolism               |
| 0.043088892 | Metabolism               |
| 0.870846885 | Metabolism               |
| 0.105110964 | Proliferation/Metastasis |
| 0.25592622  | Metabolism               |
| 0.300250897 | Metabolism               |
| 0.075466592 | Metabolism               |
| 0.67970315  | Metabolism               |
| 0.478410444 | Metabolism               |
| 0.041732367 | Metabolism               |
| 0.216507851 | Proliferation/Metastasis |
| 0.024358218 | Metabolism               |

|             |                          |
|-------------|--------------------------|
| 0.070971444 | Metabolism               |
| 0.519326813 | Proliferation/Metastasis |
| 0.016003219 | Metabolism               |
| 0.112600027 | Metabolism               |
| 0.597691221 | Metabolism               |
| 0.953963726 | Metabolism               |
| 0.796204305 | Metabolism               |
| 0.010624815 | Metabolism               |
| 0.544952448 | Metabolism               |
| 0.201930022 | Metabolism               |
| 0.044682558 | TME                      |
| 0.130468175 | TME                      |
| 0.131544616 | TME                      |
| 0.111497846 | TME                      |
| 0.336973713 | TME                      |
| 0.705399603 | Metabolism               |
| 0.045629171 | Metabolism               |
| 0.294405419 | Proliferation/Metastasis |
| 0.469794404 | Metabolism               |
| 0.106494376 | Proliferation/Metastasis |
| 0.083107341 | Metabolism               |
| 0.25958695  | TME                      |
| 0.114802178 | Metabolism               |
| 5.37E-06    | Metabolism               |
| 0.011060196 | Metabolism               |
| 0.128763677 | Metabolism               |
| 0.081235409 | TME                      |
| 0.354122138 | TME                      |
| 0.121241617 | Proliferation/Metastasis |
| 0.921461193 | Metabolism               |
| 0.007683956 | Proliferation/Metastasis |
| 0.304787441 | Proliferation/Metastasis |
| 0.048753114 | TME                      |
| 0.434418854 | TME                      |
| 0.061586996 | TME                      |
| 0.054596264 | TME                      |
| 0.014870007 | Metabolism               |
| 0.336599008 | Proliferation/Metastasis |
| 6.67E-07    | Metabolism               |
| 0.546308753 | Metabolism               |
| 0.739928356 | Proliferation/Metastasis |
| 8.43E-08    | Proliferation/Metastasis |
| 5.29E-07    | Metabolism               |

|             |                          |
|-------------|--------------------------|
| 0.677682807 | Metabolism               |
| 0.154500714 | Metabolism               |
| 0.000168883 | Metabolism               |
| 0.124486263 | TME                      |
| 0.19615718  | TME                      |
| 0.026176435 | TME                      |
| 0.589302656 | TME                      |
| 2.65E-19    | TME                      |
| 0.048222389 | Metabolism               |
| 0.079652693 | Metabolism               |
| 0.317230353 | Metabolism               |
| 0.005136328 | Metabolism               |
| 0.004775541 | Metabolism               |
| 0.326175604 | TME                      |
| 0.31909557  | TME                      |
| 0.429080458 | TME                      |
| 0.063867615 | TME                      |
| 0.381899658 | TME                      |
| 0.049961531 | TME                      |
| 0.050086322 | TME                      |
| 0.399598574 | TME                      |
| 0.028671134 | TME                      |
| 0.038465974 | Proliferation/Metastasis |
| 4.52E-12    | Proliferation/Metastasis |
| 0.007901669 | Metabolism               |
| 0.001988316 | Metabolism               |
| 0.493581013 | TME                      |
| 0.154672391 | Metabolism               |
| 1.37E-09    | Metabolism               |
| 0.47457853  | TME                      |
| 6.39E-05    | Proliferation/Metastasis |
| 0.081757282 | Proliferation/Metastasis |
| 0.577242109 | TME                      |
| 0.901622202 | Metabolism               |
| 0.003060493 | Metabolism               |
| 0.004720571 | Proliferation/Metastasis |
| 3.22E-05    | Proliferation/Metastasis |
| 0.001832884 | TME                      |
| 0.821622456 | TME                      |
| 0.040746604 | TME                      |
| 0.03458718  | TME                      |
| 0.003432052 | Proliferation/Metastasis |
| 2.03E-05    | TME                      |

|             |                          |
|-------------|--------------------------|
| 0.299430077 | TME                      |
| 0.577285135 | Metabolism               |
| 0.082444039 | TME                      |
| 0.736896046 | TME                      |
| 0.013279924 | TME                      |
| 0.56138793  | TME                      |
| 0.051558794 | Metabolism               |
| 0.069464478 | Metabolism               |
| 0.760308585 | Metabolism               |
| 0.004360977 | TME                      |
| 0.094930939 | Metabolism               |
| 0.631914009 | TME                      |
| 0.197591579 | TME                      |
| 0.010314061 | TME                      |
| 0.064731577 | TME                      |
| 0.250910827 | TME                      |
| 0.380852914 | Metabolism               |
| 0.000234332 | Proliferation/Metastasis |
| 0.314990388 | Metabolism               |
| 0.053730627 | Proliferation/Metastasis |
| 0.009766683 | Metabolism               |
| 0.184781495 | Metabolism               |
| 0.009266608 | Metabolism               |
| 0.012210346 | Metabolism               |
| 0.174853938 | Metabolism               |
| 1.24E-09    | Metabolism               |
| 0.124548031 | Metabolism               |
| 7.32E-08    | Metabolism               |
| 0.015754755 | Metabolism               |
| 1.92E-05    | Metabolism               |
| 0.003058473 | Metabolism               |
| 0.02810269  | Metabolism               |
| 0.132908595 | Metabolism               |
| 0.004546828 | Metabolism               |
| 0.14116904  | TME                      |
| 0.850635546 | Proliferation/Metastasis |
| 0.018190525 | Metabolism               |
| 6.06E-08    | Proliferation/Metastasis |
| 0.074600157 | TME                      |
| 0.000257312 | Proliferation/Metastasis |
| 0.278227752 | Proliferation/Metastasis |
| 0.265461685 | TME                      |
| 0.020712739 | TME                      |

|             |                          |
|-------------|--------------------------|
| 3.07E-06    | Metabolism               |
| 4.80E-05    | Metabolism               |
| 0.42812631  | Proliferation/Metastasis |
| 6.92E-08    | Proliferation/Metastasis |
| 0.165520912 | Proliferation/Metastasis |
| 0.000717028 | Metabolism               |
| 0.749638234 | Metabolism               |
| 7.19E-10    | Metabolism               |
| 0.220084803 | Proliferation/Metastasis |
| 0.106655127 | TME                      |
| 0.133247867 | TME                      |
| 0.556747402 | Metabolism               |
| 0.087338582 | Proliferation/Metastasis |
| 0.019599631 | Metabolism               |
| 0.400190141 | TME                      |
| 0.008561673 | TME                      |
| 2.15E-05    | TME                      |
| 0.060273002 | TME                      |
| 0.347900794 | Metabolism               |
| 0.00166674  | TME                      |
| 6.60E-06    | Proliferation/Metastasis |
| 0.178356224 | TME                      |
| 0.096901242 | Proliferation/Metastasis |
| 0.904298349 | Proliferation/Metastasis |
| 0.019432441 | Metabolism               |
| 0.057481364 | Proliferation/Metastasis |
| 0.024127066 | TME                      |
| 0.253873174 | Metabolism               |
| 0.093138965 | TME                      |
| 0.281942789 | TME                      |
| 0.407634775 | TME                      |
| 0.533197156 | TME                      |
| 0.255242264 | TME                      |
| 0.001955762 | TME                      |
| 0.053448307 | Metabolism               |
| 0.02105887  | TME                      |
| 1.68E-05    | Metabolism               |
| 0.000815844 | Metabolism               |
| 0.026753129 | Proliferation/Metastasis |
| 4.29E-05    | Proliferation/Metastasis |
| 6.45E-06    | Metabolism               |
| 0.000109037 | Metabolism               |
| 0.042782549 | Metabolism               |

|             |                          |
|-------------|--------------------------|
| 0.000546036 | Metabolism               |
| 1.35E-10    | Proliferation/Metastasis |
| 0.81445389  | Proliferation/Metastasis |
| 0.000812894 | Metabolism               |
| 0.00138979  | Metabolism               |
| 0.262173574 | Metabolism               |
| 0.000241254 | TME                      |
| 0.049635323 | Metabolism               |
| 0.49517942  | Metabolism               |
| 0.002921069 | Metabolism               |
| 0.682989138 | Metabolism               |
| 0.153834469 | Proliferation/Metastasis |
| 0.092871691 | Metabolism               |
| 0.002783184 | Metabolism               |
| 1.85E-07    | Metabolism               |
| 0.000133975 | Metabolism               |
| 0.036340098 | Metabolism               |
| 0.019007076 | Metabolism               |
| 0.315744784 | Proliferation/Metastasis |
| 0.654273991 | Metabolism               |
| 0.274604037 | Metabolism               |
| 0.376462124 | Proliferation/Metastasis |
| 7.25E-05    | Metabolism               |
| 5.00E-07    | Metabolism               |
| 2.22E-10    | Metabolism               |
| 0.602318639 | Metabolism               |
| 0.142137119 | Metabolism               |
| 0.103844437 | Metabolism               |
| 0.237319998 | Metabolism               |
| 0.00431707  | Metabolism               |
| 0.126388015 | TME                      |
| 0.040326849 | TME                      |
| 0.369350075 | TME                      |
| 0.113110959 | TME                      |
| 0.477146396 | TME                      |
| 7.37E-06    | Metabolism               |
| 0.335197333 | Metabolism               |
| 0.989062813 | Proliferation/Metastasis |
| 0.390297578 | Metabolism               |
| 0.000822741 | Proliferation/Metastasis |
| 0.103248706 | Metabolism               |
| 4.89E-09    | TME                      |
| 0.000136933 | Metabolism               |

|             |                          |
|-------------|--------------------------|
| 0.013870212 | Metabolism               |
| 0.370784556 | Metabolism               |
| 3.70E-05    | Metabolism               |
| 1.11E-06    | TME                      |
| 9.32E-06    | TME                      |
| 5.33E-07    | Proliferation/Metastasis |
| 0.184456752 | Metabolism               |
| 1.50E-06    | Proliferation/Metastasis |
| 0.000312736 | Proliferation/Metastasis |
| 1.72E-05    | TME                      |
| 2.68E-06    | TME                      |
| 1.02E-15    | TME                      |
| 4.85E-05    | TME                      |
| 0.003440498 | Metabolism               |
| 0.092312791 | Proliferation/Metastasis |
| 0.017349178 | Metabolism               |
| 0.617073372 | Metabolism               |
| 0.143203384 | Proliferation/Metastasis |
| 6.80E-06    | Proliferation/Metastasis |
| 0.030865963 | Metabolism               |
| 0.085016504 | Metabolism               |
| 0.389911909 | Metabolism               |
| 0.397013032 | Metabolism               |
| 0.13800344  | TME                      |
| 7.87E-16    | TME                      |
| 3.79E-10    | TME                      |
| 0.007134164 | TME                      |
| 0.376357004 | TME                      |
| 0.052579964 | Metabolism               |
| 0.001033919 | Metabolism               |
| 0.37791126  | Metabolism               |
| 0.021972895 | Metabolism               |
| 0.369845927 | Metabolism               |
| 9.15E-21    | TME                      |
| 3.48E-07    | TME                      |
| 0.038315263 | TME                      |
| 0.000178474 | TME                      |
| 2.94E-11    | TME                      |
| 7.63E-05    | TME                      |
| 1.36E-06    | TME                      |
| 0.403133465 | TME                      |
| 5.23E-05    | TME                      |
| 2.15E-09    | Proliferation/Metastasis |

|             |                          |
|-------------|--------------------------|
| 1.35E-18    | Proliferation/Metastasis |
| 0.005390733 | Metabolism               |
| 0.648557352 | Metabolism               |
| 0.00192818  | TME                      |
| 0.091078041 | Metabolism               |
| 0.001363336 | Metabolism               |
| 5.46E-14    | TME                      |
| 1.01E-20    | Proliferation/Metastasis |
| 0.559406313 | Proliferation/Metastasis |
| 0.729962515 | TME                      |
| 0.006280408 | Metabolism               |
| 3.90E-07    | Metabolism               |
| 2.35E-06    | Proliferation/Metastasis |
| 3.19E-13    | Proliferation/Metastasis |
| 2.27E-14    | TME                      |
| 2.43E-08    | TME                      |
| 3.31E-08    | TME                      |
| 5.17E-21    | TME                      |
| 6.19E-05    | Proliferation/Metastasis |
| 1.61E-07    | TME                      |
| 2.04E-10    | TME                      |
| 1.54E-05    | Metabolism               |
| 1.72E-12    | TME                      |
| 6.64E-07    | TME                      |
| 0.028483936 | TME                      |
| 2.49E-12    | TME                      |
| 0.524552638 | Metabolism               |
| 0.000650402 | Metabolism               |
| 4.30E-08    | Metabolism               |
| 1.42E-13    | TME                      |
| 2.78E-09    | Metabolism               |
| 3.01E-09    | TME                      |
| 8.49E-14    | TME                      |
| 5.46E-07    | TME                      |
| 0.420774027 | TME                      |
| 0.000752574 | TME                      |
| 0.027666847 | Metabolism               |
| 4.07E-14    | Proliferation/Metastasis |
| 0.564853065 | Metabolism               |
| 1.56E-05    | Proliferation/Metastasis |
| 4.50E-05    | Metabolism               |
| 0.004391857 | Metabolism               |
| 0.000217322 | Metabolism               |



|             |                          |
|-------------|--------------------------|
| 0.004737929 | Metabolism               |
| 0.055127657 | Metabolism               |
| 0.002232723 | Metabolism               |
| 0.000563539 | Metabolism               |
| 0.003809119 | Metabolism               |
| 0.368129211 | Metabolism               |
| 0.000403138 | Metabolism               |
| 0.025619695 | Metabolism               |
| 0.652166289 | Metabolism               |
| 0.033942732 | Metabolism               |
| 4.86E-05    | Metabolism               |
| 6.88E-11    | TME                      |
| 2.39E-11    | Proliferation/Metastasis |
| 0.069307158 | Metabolism               |
| 1.05E-05    | Proliferation/Metastasis |
| 0.000660098 | TME                      |
| 2.10E-08    | Proliferation/Metastasis |
| 2.92E-16    | Proliferation/Metastasis |
| 3.62E-10    | TME                      |
| 0.006007534 | TME                      |
| 1.05E-20    | Metabolism               |
| 1.84E-48    | Metabolism               |
| 2.84E-14    | Proliferation/Metastasis |
| 0.412134834 | Proliferation/Metastasis |
| 1.75E-24    | Proliferation/Metastasis |
| 0.006774865 | Metabolism               |
| 0.000117257 | Metabolism               |
| 0.302754102 | Metabolism               |
| 0.010081588 | Proliferation/Metastasis |
| 6.85E-17    | TME                      |
| 1.09E-13    | TME                      |
| 0.001560752 | Metabolism               |
| 9.50E-15    | Proliferation/Metastasis |
| 7.54E-40    | Metabolism               |
| 4.06E-16    | TME                      |
| 2.90E-13    | TME                      |
| 0.111710209 | TME                      |
| 3.67E-12    | TME                      |
| 4.27E-08    | Metabolism               |
| 6.69E-14    | TME                      |
| 1.90E-26    | Proliferation/Metastasis |
| 1.12E-05    | TME                      |
| 1.27E-05    | Proliferation/Metastasis |

|             |                          |
|-------------|--------------------------|
| 1.26E-06    | Proliferation/Metastasis |
| 1.03E-24    | Metabolism               |
| 0.041563807 | Proliferation/Metastasis |
| 1.22E-14    | TME                      |
| 0.007203501 | Metabolism               |
| 0.027576689 | TME                      |
| 4.41E-10    | TME                      |
| 0.000137416 | TME                      |
| 2.25E-06    | TME                      |
| 0.022043454 | TME                      |
| 4.14E-14    | TME                      |
| 4.71E-10    | Metabolism               |
| 4.15E-13    | TME                      |
| 0.014531478 | Metabolism               |
| 0.130551448 | Metabolism               |
| 4.38E-21    | Proliferation/Metastasis |
| 0.001656561 | Proliferation/Metastasis |
| 0.126166779 | Metabolism               |
| 0.121877138 | Metabolism               |
| 0.295629342 | Metabolism               |
| 1.37E-25    | Metabolism               |
| 0.058391241 | Proliferation/Metastasis |
| 5.29E-15    | Proliferation/Metastasis |
| 0.06129463  | Metabolism               |
| 0.211873135 | Metabolism               |
| 0.068024612 | Metabolism               |
| 9.09E-05    | TME                      |
| 5.77E-06    | Metabolism               |
| 1.06E-06    | Metabolism               |
| 0.775520647 | Metabolism               |
| 4.72E-27    | Metabolism               |
| 1.88E-09    | Proliferation/Metastasis |
| 0.140683394 | Metabolism               |
| 0.003502574 | Metabolism               |
| 0.549114117 | Metabolism               |
| 0.030833557 | Metabolism               |
| 9.42E-06    | Metabolism               |
| 0.00010351  | Metabolism               |
| 0.310787939 | Proliferation/Metastasis |
| 2.99E-05    | Metabolism               |
| 0.000111031 | Metabolism               |
| 2.86E-05    | Proliferation/Metastasis |
| 5.27E-05    | Metabolism               |

|             |                          |
|-------------|--------------------------|
| 4.31E-18    | Metabolism               |
| 3.56E-06    | Metabolism               |
| 1.58E-06    | Metabolism               |
| 0.350612079 | Metabolism               |
| 0.626239977 | Metabolism               |
| 0.665865721 | Metabolism               |
| 4.72E-05    | Metabolism               |
| 4.61E-08    | TME                      |
| 1.55E-05    | TME                      |
| 9.63E-11    | TME                      |
| 5.97E-07    | TME                      |
| 0.010864643 | TME                      |
| 0.996405043 | Metabolism               |
| 0.00641922  | Metabolism               |
| 1.39E-18    | Proliferation/Metastasis |
| 7.05E-13    | Metabolism               |
| 4.49E-10    | Proliferation/Metastasis |
| 0.006173309 | Metabolism               |
| 0.328744257 | TME                      |
| 4.38E-10    | Metabolism               |
| 0.948021092 | Metabolism               |
| 0.155948602 | Metabolism               |
| 0.004380128 | Metabolism               |
| 0.038152761 | TME                      |
| 0.846377062 | TME                      |
| 0.001511293 | Proliferation/Metastasis |
| 0.302060094 | Metabolism               |
| 0.002664393 | Proliferation/Metastasis |
| 0.525363587 | Proliferation/Metastasis |
| 4.49E-09    | TME                      |
| 9.13E-09    | TME                      |
| 4.67E-07    | TME                      |
| 6.13E-07    | TME                      |
| 0.00012923  | Metabolism               |
| 0.548720927 | Proliferation/Metastasis |
| 0.028621328 | Metabolism               |
| 0.057859303 | Metabolism               |
| 0.389520252 | Proliferation/Metastasis |
| 2.02E-13    | Proliferation/Metastasis |
| 0.053174806 | Metabolism               |
| 0.01833527  | Metabolism               |
| 5.57E-18    | Metabolism               |
| 0.000172164 | Metabolism               |

|             |                          |
|-------------|--------------------------|
| 0.056340093 | TME                      |
| 2.84E-05    | TME                      |
| 0.292712548 | TME                      |
| 9.00E-07    | TME                      |
| 2.20E-37    | TME                      |
| 2.05E-11    | Metabolism               |
| 5.22E-07    | Metabolism               |
| 2.76E-09    | Metabolism               |
| 4.08E-34    | Metabolism               |
| 0.027528696 | Metabolism               |
| 5.18E-10    | TME                      |
| 0.581559117 | TME                      |
| 4.57E-06    | TME                      |
| 0.000102553 | TME                      |
| 4.83E-14    | TME                      |
| 0.001401996 | TME                      |
| 9.17E-05    | TME                      |
| 0.001539677 | TME                      |
| 0.004033871 | TME                      |
| 5.12E-12    | Proliferation/Metastasis |
| 0.868539247 | Proliferation/Metastasis |
| 1.76E-17    | Metabolism               |
| 0.000315498 | Metabolism               |
| 5.90E-09    | TME                      |
| 0.013813872 | Metabolism               |
| 1.92E-27    | Metabolism               |
| 4.12E-12    | TME                      |
| 0.000390262 | Proliferation/Metastasis |
| 9.37E-13    | Proliferation/Metastasis |
| 0.003554642 | TME                      |
| 2.65E-07    | Metabolism               |
| 0.006804077 | Metabolism               |
| 1.46E-15    | Proliferation/Metastasis |
| 1.51E-11    | Proliferation/Metastasis |
| 0.002986196 | TME                      |
| 4.85E-07    | TME                      |
| 0.000561272 | TME                      |
| 1.76E-06    | TME                      |
| 0.489065927 | Proliferation/Metastasis |
| 1.14E-06    | TME                      |
| 5.46E-08    | TME                      |
| 0.000378781 | Metabolism               |
| 2.37E-06    | TME                      |

|             |                          |
|-------------|--------------------------|
| 4.63E-11    | TME                      |
| 0.00532648  | TME                      |
| 3.03E-17    | TME                      |
| 2.42E-12    | Metabolism               |
| 8.28E-41    | Metabolism               |
| 1.96E-15    | Metabolism               |
| 1.50E-13    | TME                      |
| 9.03E-05    | Metabolism               |
| 7.66E-05    | TME                      |
| 2.30E-05    | TME                      |
| 5.57E-07    | TME                      |
| 0.000318456 | TME                      |
| 1.75E-11    | TME                      |
| 0.814935527 | Metabolism               |
| 1.99E-13    | Proliferation/Metastasis |
| 8.78E-06    | Metabolism               |
| 0.226938006 | Proliferation/Metastasis |
| 0.481957743 | Metabolism               |
| 7.61E-07    | Metabolism               |
| 0.071529709 | Metabolism               |
| 6.10E-05    | Metabolism               |
| 6.13E-08    | Metabolism               |
| 5.82E-35    | Metabolism               |
| 1.38E-07    | Metabolism               |
| 2.11E-23    | Metabolism               |
| 0.008864249 | Metabolism               |
| 0.033735485 | Metabolism               |
| 2.81E-05    | Metabolism               |
| 0.450948807 | Metabolism               |
| 1.16E-05    | Metabolism               |
| 2.67E-18    | Metabolism               |
| 3.28E-08    | TME                      |
| 0.19872564  | Proliferation/Metastasis |
| 1.08E-05    | Metabolism               |
| 5.53E-13    | Proliferation/Metastasis |
| 0.002349135 | TME                      |
| 3.22E-13    | Proliferation/Metastasis |
| 1.35E-15    | Proliferation/Metastasis |
| 0.005713921 | TME                      |
| 1.45E-11    | TME                      |
| 1.46E-08    | Metabolism               |
| 0.002390945 | Metabolism               |
| 1.53E-11    | Proliferation/Metastasis |

|             |                          |
|-------------|--------------------------|
| 0.158870379 | Proliferation/Metastasis |
| 9.72E-05    | Proliferation/Metastasis |
| 0.000506812 | Metabolism               |
| 1.75E-18    | Metabolism               |
| 4.02E-20    | Metabolism               |
| 0.161209307 | Proliferation/Metastasis |
| 1.18E-05    | TME                      |
| 1.03E-06    | TME                      |
| 0.101174911 | Metabolism               |
| 3.97E-05    | Proliferation/Metastasis |
| 0.074379767 | Metabolism               |
| 2.28E-07    | TME                      |
| 0.126314505 | TME                      |
| 4.04E-44    | TME                      |
| 1.62E-06    | TME                      |
| 1.41E-06    | Metabolism               |
| 0.014481834 | TME                      |
| 0.03402636  | Proliferation/Metastasis |
| 1.54E-14    | TME                      |
| 4.90E-08    | Proliferation/Metastasis |
| 3.69E-05    | Proliferation/Metastasis |
| 0.534911459 | Metabolism               |
| 3.63E-08    | Proliferation/Metastasis |
| 0.001603133 | TME                      |
| 0.385807776 | Metabolism               |
| 0.077890383 | TME                      |
| 0.000673318 | TME                      |
| 0.479023437 | TME                      |
| 4.51E-05    | TME                      |
| 6.68E-11    | TME                      |
| 4.30E-05    | TME                      |
| 2.38E-20    | Metabolism               |
| 4.73E-12    | TME                      |
| 0.022383428 | Metabolism               |
| 2.07E-21    | Metabolism               |
| 7.28E-08    | Proliferation/Metastasis |
| 9.32E-11    | Proliferation/Metastasis |
| 0.67375946  | Metabolism               |
| 0.102972406 | Metabolism               |
| 7.18E-10    | Metabolism               |
| 0.001971615 | Metabolism               |
| 8.76E-08    | Proliferation/Metastasis |
| 3.82E-16    | Proliferation/Metastasis |

|             |                          |
|-------------|--------------------------|
| 0.00023197  | Metabolism               |
| 0.01181513  | Metabolism               |
| 0.653929724 | Metabolism               |
| 4.08E-07    | TME                      |
| 0.009497104 | Metabolism               |
| 6.89E-06    | Metabolism               |
| 2.25E-11    | Metabolism               |
| 0.867277243 | Metabolism               |
| 0.00292553  | Proliferation/Metastasis |
| 0.001050378 | Metabolism               |
| 1.57E-07    | Metabolism               |
| 5.14E-42    | Metabolism               |
| 9.10E-08    | Metabolism               |
| 7.61E-08    | Metabolism               |
| 2.66E-23    | Metabolism               |
| 7.81E-27    | Proliferation/Metastasis |
| 6.01E-09    | Metabolism               |
| 0.036502334 | Metabolism               |
| 0.248030377 | Proliferation/Metastasis |
| 2.61E-06    | Metabolism               |
| 0.000168861 | Metabolism               |
| 2.66E-14    | Metabolism               |
| 0.08704158  | Metabolism               |
| 0.004072049 | Metabolism               |
| 0.000150986 | Metabolism               |
| 0.111491725 | Metabolism               |
| 1.18E-27    | Metabolism               |
| 0.000139777 | TME                      |
| 0.016112555 | TME                      |
| 3.76E-14    | TME                      |
| 2.34E-07    | TME                      |
| 0.001021878 | TME                      |
| 0.52721388  | Metabolism               |
| 1.03E-12    | Metabolism               |
| 0.063185475 | Proliferation/Metastasis |
| 2.01E-09    | Metabolism               |
| 1.08E-17    | Proliferation/Metastasis |
| 9.41E-17    | Metabolism               |
| 4.25E-12    | TME                      |
| 2.79E-07    | Metabolism               |
| 0.004102764 | Metabolism               |
| 7.83E-05    | Metabolism               |
| 2.94E-37    | Metabolism               |

|             |                          |
|-------------|--------------------------|
| 0.015173773 | TME                      |
| 4.49E-05    | TME                      |
| 0.000860863 | Proliferation/Metastasis |
| 0.023489366 | Metabolism               |
| 2.89E-12    | Proliferation/Metastasis |
| 8.28E-07    | Proliferation/Metastasis |
| 0.025272122 | TME                      |
| 1.29E-05    | TME                      |
| 1.27E-06    | TME                      |
| 5.17E-06    | TME                      |
| 5.12E-10    | Metabolism               |
| 2.40E-09    | Proliferation/Metastasis |
| 0.002671856 | Metabolism               |
| 3.81E-05    | Metabolism               |
| 5.55E-15    | Proliferation/Metastasis |
| 1.33E-16    | Proliferation/Metastasis |
| 0.023076609 | Metabolism               |
| 2.94E-11    | Metabolism               |
| 7.57E-05    | Metabolism               |
| 8.35E-08    | Metabolism               |
| 0.018827398 | TME                      |
| 2.35E-14    | TME                      |
| 2.14E-11    | TME                      |
| 0.013062638 | TME                      |
| 0.435795893 | TME                      |
| 7.01E-07    | Metabolism               |
| 1.24E-06    | Metabolism               |
| 0.040649438 | Metabolism               |
| 0.001649539 | Metabolism               |
| 0.000147654 | Metabolism               |
| 5.81E-19    | TME                      |
| 1.35E-08    | TME                      |
| 0.002121802 | TME                      |
| 0.002341789 | TME                      |
| 2.12E-05    | TME                      |
| 3.17E-06    | TME                      |
| 2.07E-06    | TME                      |
| 0.001024135 | TME                      |
| 3.79E-08    | TME                      |
| 2.54E-09    | Proliferation/Metastasis |
| 4.42E-05    | Proliferation/Metastasis |
| 0.003687057 | Metabolism               |
| 0.027139798 | Metabolism               |



|             |                          |
|-------------|--------------------------|
| 0.001866862 | TME                      |
| 0.028257559 | Metabolism               |
| 0.000369235 | Metabolism               |
| 3.90E-09    | TME                      |
| 0.003911311 | Proliferation/Metastasis |
| 0.700674738 | Proliferation/Metastasis |
| 0.628707918 | TME                      |
| 0.000932273 | Metabolism               |
| 0.00315506  | Metabolism               |
| 9.03E-05    | Proliferation/Metastasis |
| 8.50E-12    | Proliferation/Metastasis |
| 1.34E-08    | TME                      |
| 0.001842206 | TME                      |
| 7.24E-08    | TME                      |
| 1.84E-13    | TME                      |
| 4.30E-07    | Proliferation/Metastasis |
| 3.11E-15    | TME                      |
| 3.42E-07    | TME                      |
| 0.275800398 | Metabolism               |
| 9.40E-13    | TME                      |
| 4.58E-05    | TME                      |
| 0.000512649 | TME                      |
| 0.006826627 | TME                      |
| 0.670150514 | Metabolism               |
| 0.006990982 | Metabolism               |
| 0.001594392 | Metabolism               |
| 1.46E-13    | TME                      |
| 0.008712143 | Metabolism               |
| 8.17E-06    | TME                      |
| 0.000212792 | TME                      |
| 2.79E-06    | TME                      |
| 0.484699022 | TME                      |
| 0.134998067 | TME                      |
| 0.06155959  | Metabolism               |
| 1.65E-09    | Proliferation/Metastasis |
| 4.17E-05    | Metabolism               |
| 3.95E-14    | Proliferation/Metastasis |
| 8.70E-09    | Metabolism               |
| 0.639375971 | Metabolism               |
| 2.02E-12    | Metabolism               |
| 0.002870019 | Metabolism               |
| 3.53E-05    | Metabolism               |
| 3.16E-06    | Metabolism               |

|             |                          |
|-------------|--------------------------|
| 1.39E-13    | Metabolism               |
| 0.000135542 | Metabolism               |
| 0.334542224 | Metabolism               |
| 2.28E-10    | Metabolism               |
| 7.95E-10    | Metabolism               |
| 1.10E-13    | Metabolism               |
| 0.11884452  | Metabolism               |
| 0.069507277 | Metabolism               |
| 1.20E-08    | TME                      |
| 1.04E-10    | Proliferation/Metastasis |
| 1.32E-06    | Metabolism               |
| 1.64E-08    | Proliferation/Metastasis |
| 3.60E-05    | TME                      |
| 2.24E-18    | Proliferation/Metastasis |
| 1.07E-15    | Proliferation/Metastasis |
| 8.01E-13    | TME                      |
| 3.07E-05    | TME                      |
| 2.20E-06    | Metabolism               |
| 1.25E-17    | Metabolism               |
| 1.24E-26    | Proliferation/Metastasis |
| 2.02E-07    | Proliferation/Metastasis |
| 9.89E-34    | Proliferation/Metastasis |
| 1.01E-06    | Metabolism               |
| 0.908658098 | Metabolism               |
| 0.106223812 | Metabolism               |
| 1.30E-07    | Proliferation/Metastasis |
| 5.02E-09    | TME                      |
| 4.19E-14    | TME                      |
| 0.011057059 | Metabolism               |
| 1.30E-09    | Proliferation/Metastasis |
| 4.13E-15    | Metabolism               |
| 1.19E-13    | TME                      |
| 8.95E-11    | TME                      |
| 3.99E-05    | TME                      |
| 3.75E-10    | TME                      |
| 0.011618897 | Metabolism               |
| 0.015214902 | TME                      |
| 1.42E-11    | Proliferation/Metastasis |
| 1.31E-05    | TME                      |
| 0.132128155 | Proliferation/Metastasis |
| 1.90E-17    | Proliferation/Metastasis |
| 1.24E-33    | Metabolism               |
| 0.00094468  | Proliferation/Metastasis |

|             |                          |
|-------------|--------------------------|
| 1.17E-10    | TME                      |
| 1.02E-10    | Metabolism               |
| 0.163829954 | TME                      |
| 5.07E-09    | TME                      |
| 0.297318183 | TME                      |
| 3.77E-07    | TME                      |
| 0.012369513 | TME                      |
| 2.07E-08    | TME                      |
| 1.96E-05    | Metabolism               |
| 2.62E-10    | TME                      |
| 0.001829531 | Metabolism               |
| 6.17E-15    | Metabolism               |
| 2.73E-11    | Proliferation/Metastasis |
| 5.62E-16    | Proliferation/Metastasis |
| 1.18E-07    | Metabolism               |
| 1.23E-06    | Metabolism               |
| 0.000135533 | Metabolism               |
| 0.045806579 | Metabolism               |
| 0.000153399 | Proliferation/Metastasis |
| 1.60E-11    | Proliferation/Metastasis |
| 2.62E-07    | Metabolism               |
| 6.29E-09    | Metabolism               |
| 9.51E-06    | Metabolism               |
| 3.12E-07    | TME                      |
| 0.000883145 | Metabolism               |
| 0.242233389 | Metabolism               |
| 0.278323287 | Metabolism               |
| 2.13E-12    | Metabolism               |
| 6.69E-28    | Proliferation/Metastasis |
| 0.000337758 | Metabolism               |
| 0.000886645 | Metabolism               |
| 0.000236455 | Metabolism               |
| 6.29E-05    | Metabolism               |
| 0.574457297 | Metabolism               |
| 0.03522962  | Metabolism               |
| 0.777827201 | Proliferation/Metastasis |
| 0.021312092 | Metabolism               |
| 0.001851837 | Metabolism               |
| 6.85E-13    | Proliferation/Metastasis |
| 1.35E-05    | Metabolism               |
| 1.40E-15    | Metabolism               |
| 5.03E-09    | Metabolism               |
| 5.77E-10    | Metabolism               |

|             |                          |
|-------------|--------------------------|
| 0.072383683 | Metabolism               |
| 0.025840858 | Metabolism               |
| 3.79E-07    | Metabolism               |
| 0.103277964 | Metabolism               |
| 2.42E-10    | TME                      |
| 3.87E-08    | TME                      |
| 9.70E-05    | TME                      |
| 1.44E-10    | TME                      |
| 0.000999393 | TME                      |
| 0.071680341 | Metabolism               |
| 3.57E-07    | Metabolism               |
| 6.56E-19    | Proliferation/Metastasis |
| 0.367803347 | Metabolism               |
| 3.28E-08    | Proliferation/Metastasis |
| 3.47E-06    | Metabolism               |
| 0.193389635 | TME                      |
| 0.006404671 | Metabolism               |
| 0.087350196 | Metabolism               |
| 0.914506896 | Metabolism               |
| 0.001430466 | Metabolism               |
| 2.89E-05    | TME                      |
| 0.013132649 | TME                      |
| 3.00E-06    | Proliferation/Metastasis |
| 4.25E-06    | Metabolism               |
| 2.49E-21    | Proliferation/Metastasis |
| 0.336817948 | Proliferation/Metastasis |
| 0.113961964 | TME                      |
| 0.087570521 | TME                      |
| 8.39E-05    | TME                      |
| 0.000865541 | TME                      |
| 5.85E-07    | Metabolism               |
| 0.83186534  | Proliferation/Metastasis |
| 7.44E-13    | Metabolism               |
| 0.15157713  | Metabolism               |
| 0.018408894 | Proliferation/Metastasis |
| 0.000242959 | Proliferation/Metastasis |
| 0.000519755 | Metabolism               |
| 0.00024165  | Metabolism               |
| 0.005099169 | Metabolism               |
| 3.12E-18    | Metabolism               |
| 1.50E-05    | TME                      |
| 0.001842798 | TME                      |
| 4.21E-12    | TME                      |

|             |                          |
|-------------|--------------------------|
| 0.024526542 | TME                      |
| 4.58E-20    | TME                      |
| 1.30E-14    | Metabolism               |
| 0.063714469 | Metabolism               |
| 0.616924686 | Metabolism               |
| 5.78E-08    | Metabolism               |
| 0.008760719 | Metabolism               |
| 4.13E-14    | TME                      |
| 1.56E-06    | TME                      |
| 0.00934934  | TME                      |
| 0.054639877 | TME                      |
| 0.005110544 | TME                      |
| 6.18E-07    | TME                      |
| 7.26E-06    | TME                      |
| 0.001197649 | TME                      |
| 0.000518828 | TME                      |
| 0.548311714 | Proliferation/Metastasis |
| 3.47E-05    | Proliferation/Metastasis |
| 0.357405884 | Metabolism               |
| 0.280665292 | Metabolism               |
| 0.547237521 | TME                      |
| 2.63E-10    | Metabolism               |
| 2.68E-15    | Metabolism               |
| 8.88E-05    | TME                      |
| 8.57E-27    | Proliferation/Metastasis |
| 0.000701228 | Proliferation/Metastasis |
| 0.870914483 | TME                      |
| 1.68E-05    | Metabolism               |
| 0.000118812 | Metabolism               |
| 0.313139274 | Proliferation/Metastasis |
| 0.135965102 | Proliferation/Metastasis |
| 3.97E-11    | TME                      |
| 7.75E-05    | TME                      |
| 1.11E-05    | TME                      |
| 8.48E-13    | TME                      |
| 8.44E-05    | Proliferation/Metastasis |
| 6.75E-08    | TME                      |
| 0.003756609 | TME                      |
| 0.082374063 | Metabolism               |
| 6.39E-07    | TME                      |
| 0.006045306 | TME                      |
| 0.00032662  | TME                      |
| 0.000808959 | TME                      |

|             |                          |
|-------------|--------------------------|
| 0.000266519 | Metabolism               |
| 5.90E-09    | Metabolism               |
| 0.149762488 | Metabolism               |
| 2.92E-06    | TME                      |
| 0.022209924 | Metabolism               |
| 0.001925731 | TME                      |
| 0.273732771 | TME                      |
| 6.35E-08    | TME                      |
| 0.98021302  | TME                      |
| 0.764960044 | TME                      |
| 0.001701332 | Metabolism               |
| 0.104534328 | Proliferation/Metastasis |
| 0.365004873 | Metabolism               |
| 0.004706504 | Proliferation/Metastasis |
| 0.001007656 | Metabolism               |
| 4.55E-05    | Metabolism               |
| 1.86E-09    | Metabolism               |
| 3.48E-05    | Metabolism               |
| 5.64E-05    | Metabolism               |
| 0.000151839 | Metabolism               |
| 0.470390157 | Metabolism               |
| 3.42E-10    | Metabolism               |
| 1.29E-08    | Metabolism               |
| 2.01E-05    | Metabolism               |
| 0.002072142 | Metabolism               |
| 0.004878099 | Metabolism               |
| 0.032882349 | Metabolism               |
| 0.018942644 | Metabolism               |
| 2.87E-09    | TME                      |
| 1.87E-16    | Proliferation/Metastasis |
| 2.41E-30    | Metabolism               |
| 0.006270228 | Proliferation/Metastasis |
| 0.000767167 | TME                      |
| 0.005121871 | Proliferation/Metastasis |
| 6.77E-05    | Proliferation/Metastasis |
| 0.088236543 | TME                      |
| 0.165772622 | TME                      |
| 1.25E-14    | Metabolism               |
| 3.67E-20    | Metabolism               |
| 0.724903489 | Proliferation/Metastasis |
| 6.46E-07    | Proliferation/Metastasis |
| 2.05E-06    | Proliferation/Metastasis |
| 4.51E-06    | Metabolism               |

|             |                          |
|-------------|--------------------------|
| 0.000502313 | Metabolism               |
| 1.37E-17    | Metabolism               |
| 0.107116145 | Proliferation/Metastasis |
| 0.009430507 | TME                      |
| 1.95E-07    | TME                      |
| 0.056599012 | Metabolism               |
| 0.06588683  | Proliferation/Metastasis |
| 1.01E-16    | Metabolism               |
| 7.33E-11    | TME                      |
| 3.61E-06    | TME                      |
| 0.026038573 | TME                      |
| 2.73E-12    | TME                      |
| 0.253639755 | Metabolism               |
| 5.38E-08    | TME                      |
| 5.66E-20    | Proliferation/Metastasis |
| 0.906418786 | TME                      |
| 1.77E-07    | Proliferation/Metastasis |
| 0.001258229 | Proliferation/Metastasis |
| 6.75E-06    | Metabolism               |
| 1.18E-12    | Proliferation/Metastasis |
| 6.89E-11    | TME                      |
| 0.016146655 | Metabolism               |
| 0.379554005 | TME                      |
| 0.002252983 | TME                      |
| 0.08419393  | TME                      |
| 0.000189437 | TME                      |
| 4.96E-08    | TME                      |
| 3.38E-07    | TME                      |
| 0.259758131 | Metabolism               |
| 0.991919439 | TME                      |
| 0.001630333 | Metabolism               |
| 1.64E-10    | Metabolism               |
| 7.99E-06    | Proliferation/Metastasis |
| 0.002891639 | Proliferation/Metastasis |
| 5.14E-16    | Metabolism               |
| 0.000258732 | Metabolism               |
| 8.19E-06    | Metabolism               |
| 1.25E-20    | Metabolism               |
| 0.000123882 | Proliferation/Metastasis |
| 0.113798272 | Proliferation/Metastasis |
| 5.83E-05    | Metabolism               |
| 2.20E-13    | Metabolism               |
| 0.22662929  | Metabolism               |

|             |                          |
|-------------|--------------------------|
| 2.03E-08    | TME                      |
| 0.048461183 | Metabolism               |
| 0.384135086 | Metabolism               |
| 0.09945872  | Metabolism               |
| 0.000278003 | Metabolism               |
| 0.342533802 | Proliferation/Metastasis |
| 0.176048064 | Metabolism               |
| 0.001742923 | Metabolism               |
| 2.18E-11    | Metabolism               |
| 1.13E-10    | Metabolism               |
| 1.60E-14    | Metabolism               |
| 0.106122637 | Metabolism               |
| 0.300300497 | Proliferation/Metastasis |
| 0.024801745 | Metabolism               |
| 0.009243704 | Metabolism               |
| 5.74E-09    | Proliferation/Metastasis |
| 7.44E-05    | Metabolism               |
| 1.62E-24    | Metabolism               |
| 9.05E-08    | Metabolism               |
| 0.002026843 | Metabolism               |
| 1.11E-21    | Metabolism               |
| 0.074359695 | Metabolism               |
| 0.872666091 | Metabolism               |
| 0.012465927 | Metabolism               |
| 1.36E-09    | TME                      |
| 2.05E-08    | TME                      |
| 0.004450605 | TME                      |
| 2.09E-07    | TME                      |
| 0.085016676 | TME                      |
| 0.016105836 | Metabolism               |
| 0.271541474 | Metabolism               |
| 2.16E-07    | Proliferation/Metastasis |
| 0.100778436 | Metabolism               |
| 0.462435845 | Proliferation/Metastasis |
| 5.53E-11    | Metabolism               |
| 9.02E-08    | TME                      |
| 0.09750144  | Metabolism               |
| 1.16E-05    | Metabolism               |
| 7.02E-14    | Metabolism               |
| 4.10E-10    | Metabolism               |
| 2.39E-09    | TME                      |
| 0.199270817 | TME                      |
| 0.3508457   | Proliferation/Metastasis |



|             |                          |
|-------------|--------------------------|
| 0.075550532 | Metabolism               |
| 0.35917351  | Proliferation/Metastasis |
| 0.275051885 | Proliferation/Metastasis |
| 0.021776239 | TME                      |
| 0.643719608 | TME                      |
| 0.732678183 | TME                      |
| 0.379671689 | TME                      |
| 8.61E-09    | Metabolism               |
| 0.002947182 | Proliferation/Metastasis |
| 0.007032853 | Metabolism               |
| 0.022296303 | Metabolism               |
| 0.672171997 | Proliferation/Metastasis |
| 0.536989761 | Proliferation/Metastasis |
| 2.62E-06    | Metabolism               |
| 2.21E-08    | Metabolism               |
| 2.35E-06    | Metabolism               |
| 6.52E-12    | Metabolism               |
| 9.76E-05    | TME                      |
| 0.165431098 | TME                      |
| 0.003057731 | TME                      |
| 0.375249113 | TME                      |
| 0.692673968 | TME                      |
| 2.03E-09    | Metabolism               |
| 6.25E-06    | Metabolism               |
| 0.95401341  | Metabolism               |
| 1.85E-05    | Metabolism               |
| 0.016139362 | Metabolism               |
| 0.788379299 | TME                      |
| 0.160674386 | TME                      |
| 0.933679176 | TME                      |
| 0.495863023 | TME                      |
| 0.232679137 | TME                      |
| 0.25463815  | TME                      |
| 0.512178684 | TME                      |
| 0.28089566  | TME                      |
| 0.681347976 | TME                      |
| 0.000186141 | Proliferation/Metastasis |
| 0.33700578  | Proliferation/Metastasis |
| 0.009045822 | Metabolism               |
| 5.29E-08    | Metabolism               |
| 0.160189708 | TME                      |
| 1.35E-13    | Metabolism               |
| 0.103615181 | Metabolism               |

|             |                          |
|-------------|--------------------------|
| 0.674099206 | TME                      |
| 0.918174967 | Proliferation/Metastasis |
| 0.015346418 | Proliferation/Metastasis |
| 0.379683799 | TME                      |
| 1.23E-19    | Metabolism               |
| 2.34E-12    | Metabolism               |
| 0.005437921 | Proliferation/Metastasis |
| 0.001027082 | Proliferation/Metastasis |
| 0.119591012 | TME                      |
| 0.84492105  | TME                      |
| 0.416618412 | TME                      |
| 0.11266048  | TME                      |
| 0.015813538 | Proliferation/Metastasis |
| 0.021876429 | TME                      |
| 0.87442351  | TME                      |
| 0.0060726   | Metabolism               |
| 0.750955588 | TME                      |
| 0.904637187 | TME                      |
| 0.221558282 | TME                      |
| 0.694263316 | TME                      |
| 0.101462837 | Metabolism               |
| 1.52E-07    | Metabolism               |
| 0.000694088 | Metabolism               |
| 0.057804045 | TME                      |
| 3.85E-06    | Metabolism               |
| 0.8270038   | TME                      |
| 0.248341923 | TME                      |
| 0.160077931 | TME                      |
| 0.201528168 | TME                      |
| 0.745211406 | TME                      |
| 4.71E-11    | Metabolism               |
| 2.08E-05    | Proliferation/Metastasis |
| 0.038973107 | Metabolism               |
| 0.000170434 | Proliferation/Metastasis |
| 7.88E-05    | Metabolism               |
| 7.21E-08    | Metabolism               |
| 0.001767805 | Metabolism               |
| 9.83E-14    | Metabolism               |
| 5.68E-10    | Metabolism               |
| 0.015877792 | Metabolism               |
| 0.001954312 | Metabolism               |
| 0.000128438 | Metabolism               |
| 0.189784524 | Metabolism               |

|             |                          |
|-------------|--------------------------|
| 7.11E-05    | Metabolism               |
| 0.063128533 | Metabolism               |
| 0.001761265 | Metabolism               |
| 0.95812897  | Metabolism               |
| 1.19E-06    | Metabolism               |
| 0.210052287 | TME                      |
| 0.041815598 | Proliferation/Metastasis |
| 2.54E-10    | Metabolism               |
| 0.099567997 | Proliferation/Metastasis |
| 0.261080077 | TME                      |
| 0.30194799  | Proliferation/Metastasis |
| 0.155946434 | Proliferation/Metastasis |
| 0.053482765 | TME                      |
| 0.461172176 | TME                      |
| 0.045930073 | Metabolism               |
| 0.156445607 | Metabolism               |
| 0.517975459 | Proliferation/Metastasis |
| 0.09126237  | Proliferation/Metastasis |
| 0.434735216 | Proliferation/Metastasis |
| 1.52E-05    | Metabolism               |
| 0.041623937 | Metabolism               |
| 0.057367044 | Metabolism               |
| 0.207357112 | Proliferation/Metastasis |
| 0.821926273 | TME                      |
| 0.999205234 | TME                      |
| 0.000638943 | Metabolism               |
| 0.000206115 | Proliferation/Metastasis |
| 0.098360841 | Metabolism               |
| 0.647995851 | TME                      |
| 0.818999846 | TME                      |
| 0.000483555 | TME                      |
| 0.551948015 | TME                      |
| 3.81E-15    | Metabolism               |
| 0.2811392   | TME                      |
| 1.04E-05    | Proliferation/Metastasis |
| 0.428068419 | TME                      |
| 0.007410063 | Proliferation/Metastasis |
| 0.578117299 | Proliferation/Metastasis |
| 0.060278251 | Metabolism               |
| 0.41969982  | Proliferation/Metastasis |
| 0.256053776 | TME                      |
| 0.82211948  | Metabolism               |
| 0.281929526 | TME                      |

|             |                          |
|-------------|--------------------------|
| 0.128996598 | TME                      |
| 0.039651136 | TME                      |
| 0.388803623 | TME                      |
| 0.812787392 | TME                      |
| 0.6223782   | TME                      |
| 0.27580891  | Metabolism               |
| 0.097444663 | TME                      |
| 2.54E-09    | Metabolism               |
| 0.014892975 | Metabolism               |
| 0.868464587 | Proliferation/Metastasis |
| 0.698404771 | Proliferation/Metastasis |
| 0.000195546 | Metabolism               |
| 0.646127689 | Metabolism               |
| 0.145326227 | Metabolism               |
| 0.042067485 | Metabolism               |
| 0.112706468 | Proliferation/Metastasis |
| 0.471268994 | Proliferation/Metastasis |
| 4.02E-05    | Metabolism               |
| 2.92E-15    | Metabolism               |
| 0.000195741 | Metabolism               |
| 0.573096476 | TME                      |
| 6.07E-13    | Metabolism               |
| 0.001011915 | Metabolism               |
| 0.01420436  | Metabolism               |
| 0.013321688 | Metabolism               |
| 0.674985967 | Proliferation/Metastasis |
| 1.49E-13    | Metabolism               |
| 2.85E-11    | Metabolism               |
| 0.001403725 | Metabolism               |
| 0.394969002 | Metabolism               |
| 0.166682828 | Metabolism               |
| 2.39E-05    | Metabolism               |
| 0.026830535 | Proliferation/Metastasis |
| 3.27E-13    | Metabolism               |
| 2.19E-05    | Metabolism               |
| 0.299953809 | Proliferation/Metastasis |
| 0.046264995 | Metabolism               |
| 0.027519724 | Metabolism               |
| 0.138648709 | Metabolism               |
| 0.002254104 | Metabolism               |
| 0.498359645 | Metabolism               |
| 1.72E-18    | Metabolism               |
| 0.000127299 | Metabolism               |

|             |                          |
|-------------|--------------------------|
| 0.021746675 | Metabolism               |
| 0.038427681 | TME                      |
| 0.004088843 | TME                      |
| 0.336373453 | TME                      |
| 0.083900913 | TME                      |
| 0.869126019 | TME                      |
| 0.301309947 | Metabolism               |
| 0.010733695 | Metabolism               |
| 0.004815292 | Proliferation/Metastasis |
| 0.002923386 | Metabolism               |
| 0.88998879  | Proliferation/Metastasis |
| 2.51E-08    | Metabolism               |
| 0.725004539 | TME                      |
| 5.36E-13    | Metabolism               |
| 0.001624749 | Metabolism               |
| 0.720226793 | Metabolism               |
| 0.000113167 | Metabolism               |
| 0.270777087 | TME                      |
| 0.058121043 | TME                      |
| 0.001963994 | Proliferation/Metastasis |
| 4.83E-06    | Metabolism               |
| 0.814495263 | Proliferation/Metastasis |
| 1.27E-07    | Proliferation/Metastasis |
| 2.58E-06    | TME                      |
| 6.87E-09    | TME                      |
| 2.51E-09    | TME                      |
| 4.52E-11    | TME                      |
| 0.000430309 | Metabolism               |
| 0.014882145 | Proliferation/Metastasis |
| 5.99E-07    | Metabolism               |
| 0.047316457 | Metabolism               |
| 0.458498026 | Proliferation/Metastasis |
| 1.16E-06    | Proliferation/Metastasis |
| 9.76E-12    | Metabolism               |
| 0.708677224 | Metabolism               |
| 0.219798337 | Metabolism               |
| 0.003009344 | Metabolism               |
| 0.000411992 | TME                      |
| 1.11E-05    | TME                      |
| 1.96E-08    | TME                      |
| 1.32E-09    | TME                      |
| 1.35E-09    | TME                      |
| 0.004384827 | Metabolism               |

|             |                          |
|-------------|--------------------------|
| 0.429170408 | Metabolism               |
| 0.008565257 | Metabolism               |
| 9.88E-08    | Metabolism               |
| 0.302781884 | Metabolism               |
| 1.06E-08    | TME                      |
| 5.26E-06    | TME                      |
| 5.30E-14    | TME                      |
| 3.28E-09    | TME                      |
| 5.33E-11    | TME                      |
| 2.53E-11    | TME                      |
| 1.77E-11    | TME                      |
| 2.58E-09    | TME                      |
| 2.65E-08    | TME                      |
| 0.410142267 | Proliferation/Metastasis |
| 3.22E-06    | Proliferation/Metastasis |
| 0.000510614 | Metabolism               |
| 0.003772779 | Metabolism               |
| 3.69E-13    | TME                      |
| 0.004845954 | Metabolism               |
| 1.78E-10    | Metabolism               |
| 4.54E-12    | TME                      |
| 0.663756793 | Proliferation/Metastasis |
| 0.0303472   | Proliferation/Metastasis |
| 3.60E-07    | TME                      |
| 0.397571758 | Metabolism               |
| 0.031104379 | Metabolism               |
| 0.150475612 | Proliferation/Metastasis |
| 3.60E-06    | Proliferation/Metastasis |
| 7.72E-08    | TME                      |
| 2.45E-11    | TME                      |
| 2.83E-12    | TME                      |
| 1.92E-11    | TME                      |
| 0.388405268 | Proliferation/Metastasis |
| 8.85E-14    | TME                      |
| 1.82E-12    | TME                      |
| 0.003651545 | Metabolism               |
| 7.58E-11    | TME                      |
| 1.42E-13    | TME                      |
| 4.48E-09    | TME                      |
| 0.004618381 | TME                      |
| 0.218708978 | Metabolism               |
| 0.100885274 | Metabolism               |
| 0.597785387 | Metabolism               |

|             |                          |
|-------------|--------------------------|
| 6.81E-16    | TME                      |
| 0.805618047 | Metabolism               |
| 1.63E-13    | TME                      |
| 2.48E-05    | TME                      |
| 8.22E-09    | TME                      |
| 1.26E-05    | TME                      |
| 0.000376398 | TME                      |
| 0.011816287 | Metabolism               |
| 0.400914535 | Proliferation/Metastasis |
| 0.266451255 | Metabolism               |
| 0.561207163 | Proliferation/Metastasis |
| 0.103900777 | Metabolism               |
| 0.181327333 | Metabolism               |
| 0.003368109 | Metabolism               |
| 6.38E-05    | Metabolism               |
| 0.389785746 | Metabolism               |
| 6.36E-07    | Metabolism               |
| 0.275802495 | Metabolism               |
| 6.96E-11    | Metabolism               |
| 0.614241685 | Metabolism               |
| 1.29E-08    | Metabolism               |
| 4.44E-07    | Metabolism               |
| 6.15E-06    | Metabolism               |
| 1.09E-06    | Metabolism               |
| 0.000705469 | Metabolism               |
| 1.08E-08    | TME                      |
| 0.514778416 | Proliferation/Metastasis |
| 5.67E-05    | Metabolism               |
| 3.04E-11    | Proliferation/Metastasis |
| 1.44E-09    | TME                      |
| 9.58E-15    | Proliferation/Metastasis |
| 3.15E-14    | Proliferation/Metastasis |
| 2.07E-08    | TME                      |
| 7.05E-17    | TME                      |
| 0.475831069 | Metabolism               |
| 0.710343337 | Metabolism               |
| 0.82580877  | Proliferation/Metastasis |
| 0.037816824 | Proliferation/Metastasis |
| 3.14E-11    | Proliferation/Metastasis |
| 3.86E-08    | Metabolism               |
| 0.757081458 | Metabolism               |
| 1.75E-13    | Metabolism               |
| 0.286777339 | Proliferation/Metastasis |

|             |                          |
|-------------|--------------------------|
| 1.65E-12    | TME                      |
| 6.66E-10    | TME                      |
| 0.005690225 | Metabolism               |
| 9.89E-08    | Proliferation/Metastasis |
| 0.645847226 | Metabolism               |
| 1.78E-07    | TME                      |
| 2.00E-11    | TME                      |
| 5.49E-10    | TME                      |
| 7.85E-16    | TME                      |
| 0.498617983 | Metabolism               |
| 0.004968678 | TME                      |
| 0.000225604 | Proliferation/Metastasis |
| 1.60E-16    | TME                      |
| 0.870804371 | Proliferation/Metastasis |
| 0.265780255 | Proliferation/Metastasis |
| 0.127190996 | Metabolism               |
| 0.683578701 | Proliferation/Metastasis |
| 8.19E-11    | TME                      |
| 0.451800831 | Metabolism               |
| 3.72E-07    | TME                      |
| 1.17E-11    | TME                      |
| 5.01E-13    | TME                      |
| 9.97E-14    | TME                      |
| 5.05E-08    | TME                      |
| 2.77E-11    | TME                      |
| 1.37E-07    | Metabolism               |
| 6.39E-20    | TME                      |
| 0.043193032 | Metabolism               |
| 0.877587832 | Metabolism               |
| 1.00E-13    | Proliferation/Metastasis |
| 0.547256137 | Proliferation/Metastasis |
| 1.73E-05    | Metabolism               |
| 0.022724834 | Metabolism               |
| 0.575783675 | Metabolism               |
| 0.146646881 | Metabolism               |
| 4.66E-11    | Proliferation/Metastasis |
| 0.016991381 | Proliferation/Metastasis |
| 0.193596425 | Metabolism               |
| 0.012302551 | Metabolism               |
| 0.78006634  | Metabolism               |
| 1.43E-18    | TME                      |
| 0.602661302 | Metabolism               |
| 0.41535332  | Metabolism               |



|             |                          |
|-------------|--------------------------|
| 0.119722684 | Metabolism               |
| 0.608978733 | Metabolism               |
| 0.012710828 | Proliferation/Metastasis |
| 0.129485337 | Metabolism               |
| 0.460196936 | Metabolism               |
| 2.39E-06    | Metabolism               |
| 0.104697474 | Metabolism               |
| 0.353278992 | Metabolism               |
| 0.002677624 | Metabolism               |
| 0.157849554 | Proliferation/Metastasis |
| 0.353200656 | Metabolism               |
| 0.958210739 | Metabolism               |
| 0.316470176 | Proliferation/Metastasis |
| 4.91E-06    | Metabolism               |
| 7.68E-11    | Metabolism               |
| 7.64E-06    | Metabolism               |
| 0.671762306 | Metabolism               |
| 0.745597298 | Metabolism               |
| 0.28878834  | Metabolism               |
| 0.000105045 | Metabolism               |
| 1.39E-09    | Metabolism               |
| 2.71E-10    | TME                      |
| 6.10E-06    | TME                      |
| 1.08E-11    | TME                      |
| 1.60E-11    | TME                      |
| 1.56E-19    | TME                      |
| 0.009783976 | Metabolism               |
| 0.002732237 | Metabolism               |
| 0.110108728 | Proliferation/Metastasis |
| 0.003186506 | Metabolism               |
| 2.84E-12    | Proliferation/Metastasis |
| 0.082383906 | Metabolism               |
| 0.037024226 | TME                      |
| 0.621279583 | Metabolism               |
| 0.005540169 | Metabolism               |
| 0.005824031 | Metabolism               |
| 1.39E-05    | Metabolism               |
| 1.88E-27    | TME                      |
| 4.48E-13    | TME                      |
| 1.04E-11    | Proliferation/Metastasis |
| 0.028710495 | Metabolism               |
| 0.090952915 | Proliferation/Metastasis |
| 0.237477545 | Proliferation/Metastasis |

|             |                          |
|-------------|--------------------------|
| 0.111208567 | TME                      |
| 0.643420158 | TME                      |
| 0.004361842 | TME                      |
| 0.176236484 | TME                      |
| 0.237332863 | Metabolism               |
| 0.278401094 | Proliferation/Metastasis |
| 0.000112754 | Metabolism               |
| 0.571734252 | Metabolism               |
| 0.408349917 | Proliferation/Metastasis |
| 0.001232083 | Proliferation/Metastasis |
| 0.000726307 | Metabolism               |
| 0.030299419 | Metabolism               |
| 0.108315837 | Metabolism               |
| 0.851833219 | Metabolism               |
| 0.382594618 | TME                      |
| 0.069270502 | TME                      |
| 0.035131792 | TME                      |
| 0.677696682 | TME                      |
| 0.000411082 | TME                      |
| 0.435050983 | Metabolism               |
| 0.154716392 | Metabolism               |
| 0.23907303  | Metabolism               |
| 0.124361805 | Metabolism               |
| 0.043012647 | Metabolism               |
| 1.56E-09    | TME                      |
| 0.205817008 | TME                      |
| 0.812181844 | TME                      |
| 0.000603487 | TME                      |
| 0.307391046 | TME                      |
| 0.518839536 | TME                      |
| 0.282129625 | TME                      |
| 0.615691098 | TME                      |
| 0.685262251 | TME                      |
| 3.13E-07    | Proliferation/Metastasis |
| 2.04E-11    | Proliferation/Metastasis |
| 0.495566297 | Metabolism               |
| 0.72917669  | Metabolism               |
| 0.502116739 | TME                      |
| 0.00037617  | Metabolism               |
| 2.94E-12    | Metabolism               |
| 0.106342855 | TME                      |
| 6.79E-10    | Proliferation/Metastasis |
| 0.989288061 | Proliferation/Metastasis |

|             |                          |
|-------------|--------------------------|
| 0.980330824 | TME                      |
| 0.004800517 | Metabolism               |
| 4.04E-05    | Metabolism               |
| 0.000172483 | Proliferation/Metastasis |
| 7.05E-09    | Proliferation/Metastasis |
| 5.34E-07    | TME                      |
| 0.48690227  | TME                      |
| 0.006567896 | TME                      |
| 0.015116259 | TME                      |
| 0.000107553 | Proliferation/Metastasis |
| 4.04E-09    | TME                      |
| 0.556906087 | TME                      |
| 0.972167163 | Metabolism               |
| 0.000102772 | TME                      |
| 0.010082782 | TME                      |
| 0.292824847 | TME                      |
| 0.000836657 | TME                      |
| 0.039703035 | Metabolism               |
| 0.779977698 | Metabolism               |
| 0.509157684 | Metabolism               |
| 3.53E-06    | TME                      |
| 0.000459197 | Metabolism               |
| 0.013675527 | TME                      |
| 0.080009415 | TME                      |
| 0.022659109 | TME                      |
| 0.033157905 | TME                      |
| 0.357261844 | TME                      |
| 0.063595239 | Metabolism               |
| 1.02E-09    | Proliferation/Metastasis |
| 0.217662597 | Metabolism               |
| 0.000373904 | Proliferation/Metastasis |
| 0.044787836 | Metabolism               |
| 0.037136696 | Metabolism               |
| 1.81E-05    | Metabolism               |
| 0.00137931  | Metabolism               |
| 0.732757659 | Metabolism               |
| 0.071752569 | Metabolism               |
| 0.832098348 | Metabolism               |
| 0.618661669 | Metabolism               |
| 0.505786551 | Metabolism               |
| 0.705454219 | Metabolism               |
| 0.763608135 | Metabolism               |
| 0.087992032 | Metabolism               |

|             |                          |
|-------------|--------------------------|
| 0.244935401 | Metabolism               |
| 0.030878168 | Metabolism               |
| 0.718652584 | TME                      |
| 3.48E-07    | Proliferation/Metastasis |
| 0.000282463 | Metabolism               |
| 0.004033886 | Proliferation/Metastasis |
| 0.365941289 | TME                      |
| 0.004639782 | Proliferation/Metastasis |
| 0.000524585 | Proliferation/Metastasis |
| 0.00013768  | TME                      |
| 0.094769251 | TME                      |
| 2.21E-12    | Metabolism               |
| 6.70E-23    | Metabolism               |
| 7.38E-05    | Proliferation/Metastasis |
| 0.080588928 | Proliferation/Metastasis |
| 2.24E-05    | Proliferation/Metastasis |
| 0.000379109 | Metabolism               |
| 5.11E-08    | Metabolism               |
| 0.56626696  | Metabolism               |
| 0.439323715 | Proliferation/Metastasis |
| 0.098651761 | TME                      |
| 0.629563779 | TME                      |
| 1.55E-07    | Metabolism               |
| 3.78E-05    | Proliferation/Metastasis |
| 9.55E-19    | Metabolism               |
| 0.000390222 | TME                      |
| 0.214585887 | TME                      |
| 0.373685642 | TME                      |
| 4.36E-06    | TME                      |
| 0.000498929 | Metabolism               |
| 2.82E-07    | TME                      |
| 5.10E-19    | Proliferation/Metastasis |
| 0.710445018 | TME                      |
| 0.000958563 | Proliferation/Metastasis |
| 0.00205142  | Proliferation/Metastasis |
| 7.31E-21    | Metabolism               |
| 0.750801424 | Proliferation/Metastasis |
| 0.139488795 | TME                      |
| 0.012499551 | Metabolism               |
| 0.508037741 | TME                      |
| 1.90E-06    | TME                      |
| 0.000131272 | TME                      |
| 0.389856098 | TME                      |

|             |                          |
|-------------|--------------------------|
| 0.002827914 | TME                      |
| 0.011942388 | TME                      |
| 0.290789968 | Metabolism               |
| 0.142505481 | TME                      |
| 0.625217401 | Metabolism               |
| 0.00097882  | Metabolism               |
| 8.27E-05    | Proliferation/Metastasis |
| 0.041368647 | Proliferation/Metastasis |
| 0.284906723 | Metabolism               |
| 0.957387414 | Metabolism               |
| 1.38E-06    | Metabolism               |
| 7.55E-11    | Metabolism               |
| 0.316539005 | Proliferation/Metastasis |
| 1.05E-08    | Proliferation/Metastasis |
| 0.543581838 | Metabolism               |
| 0.692322741 | Metabolism               |
| 0.803593468 | Metabolism               |
| 0.017003725 | TME                      |
| 0.000596349 | Metabolism               |
| 0.036685009 | Metabolism               |
| 0.870755614 | Metabolism               |
| 3.26E-12    | Metabolism               |
| 2.15E-05    | Proliferation/Metastasis |
| 0.050237438 | Metabolism               |
| 0.004595944 | Metabolism               |
| 0.099464064 | Metabolism               |
| 0.585553204 | Metabolism               |
| 0.000433506 | Metabolism               |
| 0.11272853  | Metabolism               |
| 0.577257545 | Proliferation/Metastasis |
| 0.006596961 | Metabolism               |
| 1.95E-06    | Metabolism               |
| 1.98E-08    | Proliferation/Metastasis |
| 0.021673376 | Metabolism               |
| 4.97E-19    | Metabolism               |
| 1.74E-06    | Metabolism               |
| 0.077607688 | Metabolism               |
| 0.056672057 | Metabolism               |
| 0.218781386 | Metabolism               |
| 0.022491264 | Metabolism               |
| 0.026989829 | Metabolism               |
| 0.118530052 | TME                      |
| 0.425323363 | TME                      |

|             |                          |
|-------------|--------------------------|
| 0.007467128 | TME                      |
| 0.003348478 | TME                      |
| 0.105006929 | TME                      |
| 0.818694953 | Metabolism               |
| 0.107171537 | Metabolism               |
| 1.29E-12    | Proliferation/Metastasis |
| 4.87E-05    | Metabolism               |
| 0.000411372 | Proliferation/Metastasis |
| 0.018517739 | Metabolism               |
| 0.000450295 | TME                      |
| 8.19E-05    | Metabolism               |
| 0.423723557 | Metabolism               |
| 0.000100936 | Metabolism               |
| 0.595139194 | Metabolism               |
| 0.407956434 | TME                      |
| 0.035191826 | TME                      |
| 0.871712649 | Proliferation/Metastasis |
| 0.005329382 | Metabolism               |
| 0.043727422 | Proliferation/Metastasis |
| 0.110271102 | Proliferation/Metastasis |
| 6.05E-07    | TME                      |
| 0.041692471 | TME                      |
| 0.008568287 | TME                      |
| 2.50E-06    | TME                      |
| 0.02945353  | Metabolism               |
| 3.46E-09    | Proliferation/Metastasis |
| 0.226562341 | Metabolism               |
| 6.51E-09    | Metabolism               |
| 0.000223672 | Proliferation/Metastasis |
| 0.282789289 | Proliferation/Metastasis |
| 6.87E-05    | Metabolism               |
| 0.002619882 | Metabolism               |
| 0.543470434 | Metabolism               |
| 2.84E-06    | Metabolism               |
| 3.23E-09    | TME                      |
| 0.279207856 | TME                      |
| 0.006152939 | TME                      |
| 0.027512185 | TME                      |
| 1.50E-06    | TME                      |
| 0.290083882 | Metabolism               |
| 0.038311732 | Metabolism               |
| 0.000733749 | Metabolism               |
| 1.37E-05    | Metabolism               |

|             |                          |
|-------------|--------------------------|
| 0.268460687 | Metabolism               |
| 0.049920739 | TME                      |
| 8.90E-05    | TME                      |
| 0.10553597  | TME                      |
| 0.002230973 | TME                      |
| 0.0074121   | TME                      |
| 0.054913735 | TME                      |
| 0.031202524 | TME                      |
| 0.05438376  | TME                      |
| 0.002786139 | TME                      |
| 7.67E-24    | Proliferation/Metastasis |
| 9.00E-12    | Proliferation/Metastasis |
| 0.0322657   | Metabolism               |
| 1.16E-05    | Metabolism               |
| 0.002319909 | TME                      |
| 0.070472858 | Metabolism               |
| 8.21E-07    | Metabolism               |
| 0.272360345 | TME                      |
| 1.21E-08    | Proliferation/Metastasis |
| 1.31E-15    | Proliferation/Metastasis |
| 0.000602468 | TME                      |
| 0.04214161  | Metabolism               |
| 7.83E-11    | Metabolism               |
| 3.28E-30    | Proliferation/Metastasis |
| 0.000209148 | Proliferation/Metastasis |
| 0.020321388 | TME                      |
| 0.995023772 | TME                      |
| 0.006596525 | TME                      |
| 0.007134244 | TME                      |
| 1.48E-14    | Proliferation/Metastasis |
| 4.65E-05    | TME                      |
| 0.211667465 | TME                      |
| 0.498603834 | Metabolism               |
| 5.75E-05    | TME                      |
| 0.001658028 | TME                      |
| 0.008241644 | TME                      |
| 0.032469236 | TME                      |
| 0.635202471 | Metabolism               |
| 0.066724404 | Metabolism               |
| 0.107603644 | Metabolism               |
| 1.63E-09    | TME                      |
| 1.18E-08    | Metabolism               |
| 0.000931353 | TME                      |

|             |                          |
|-------------|--------------------------|
| 0.210536505 | TME                      |
| 0.001672221 | TME                      |
| 0.000652274 | TME                      |
| 2.09E-07    | TME                      |
| 2.86E-06    | Metabolism               |
| 1.81E-26    | Proliferation/Metastasis |
| 0.006485375 | Metabolism               |
| 0.003155514 | Proliferation/Metastasis |
| 7.44E-14    | Metabolism               |
| 2.49E-05    | Metabolism               |
| 0.274793282 | Metabolism               |
| 0.099704873 | Metabolism               |
| 0.476509794 | Metabolism               |
| 0.916141845 | Metabolism               |
| 0.952892896 | Metabolism               |
| 6.28E-08    | Metabolism               |
| 0.016371405 | Metabolism               |
| 3.15E-05    | Metabolism               |
| 0.033570403 | Metabolism               |
| 0.436152475 | Metabolism               |
| 0.906942958 | Metabolism               |
| 0.02098275  | Metabolism               |
| 0.413246702 | TME                      |
| 0.148736463 | Proliferation/Metastasis |
| 8.36E-10    | Metabolism               |
| 0.000155384 | Proliferation/Metastasis |
| 0.111711281 | TME                      |
| 0.000702133 | Proliferation/Metastasis |
| 0.000261475 | Proliferation/Metastasis |
| 1.83E-05    | TME                      |
| 0.045002785 | TME                      |
| 0.016842638 | Metabolism               |
| 0.689624364 | Metabolism               |
| 1.89E-20    | Proliferation/Metastasis |
| 1.46E-30    | Proliferation/Metastasis |
| 0.561708243 | Proliferation/Metastasis |
| 0.070286903 | Metabolism               |
| 0.725592931 | Metabolism               |
| 2.84E-07    | Metabolism               |
| 0.324377097 | Proliferation/Metastasis |
| 0.036281722 | TME                      |
| 0.626688797 | TME                      |
| 0.001177194 | Metabolism               |



|             |                          |
|-------------|--------------------------|
| 0.003272838 | Proliferation/Metastasis |
| 0.000391244 | Metabolism               |
| 0.128820869 | TME                      |
| 0.04668553  | TME                      |
| 0.011131476 | TME                      |
| 0.00135045  | TME                      |
| 1.63E-06    | Metabolism               |
| 0.520872473 | TME                      |
| 0.058641818 | Proliferation/Metastasis |
| 0.068192755 | TME                      |
| 0.505402357 | Proliferation/Metastasis |
| 1.81E-30    | Proliferation/Metastasis |
| 0.349467277 | Metabolism               |
| 8.18E-36    | Proliferation/Metastasis |
| 0.288898003 | TME                      |
| 2.56E-06    | Metabolism               |
| 0.000231215 | TME                      |
| 0.003226748 | TME                      |
| 0.132763345 | TME                      |
| 0.062514983 | TME                      |
| 5.97E-10    | TME                      |
| 0.237094067 | TME                      |
| 0.00026712  | Metabolism               |
| 0.004990859 | TME                      |
| 0.040240249 | Metabolism               |
| 0.218783357 | Metabolism               |
| 0.000253874 | Proliferation/Metastasis |
| 0.246422253 | Proliferation/Metastasis |
| 1.11E-08    | Metabolism               |
| 0.232868881 | Metabolism               |
| 0.000388112 | Metabolism               |
| 0.297183183 | Metabolism               |
| 0.000603519 | Proliferation/Metastasis |
| 1.61E-13    | Proliferation/Metastasis |
| 0.950473981 | Metabolism               |
| 3.27E-10    | Metabolism               |
| 4.54E-13    | Metabolism               |
| 1.58E-06    | TME                      |
| 0.411615617 | Metabolism               |
| 0.034302076 | Metabolism               |
| 0.250718408 | Metabolism               |
| 0.048366071 | Metabolism               |
| 4.50E-08    | Proliferation/Metastasis |

|             |                          |
|-------------|--------------------------|
| 4.66E-07    | Metabolism               |
| 0.320795133 | Metabolism               |
| 7.76E-06    | Metabolism               |
| 4.27E-27    | Metabolism               |
| 1.46E-16    | Metabolism               |
| 0.535274007 | Metabolism               |
| 3.21E-07    | Proliferation/Metastasis |
| 0.000129132 | Metabolism               |
| 0.000540442 | Metabolism               |
| 0.000517648 | Proliferation/Metastasis |
| 0.073289567 | Metabolism               |
| 6.23E-05    | Metabolism               |
| 5.67E-06    | Metabolism               |
| 1.76E-05    | Metabolism               |
| 3.45E-06    | Metabolism               |
| 4.34E-09    | Metabolism               |
| 0.507080697 | Metabolism               |
| 1.90E-09    | Metabolism               |
| 0.169304444 | TME                      |
| 0.610016407 | TME                      |
| 0.972799064 | TME                      |
| 0.095546587 | TME                      |
| 0.000187838 | TME                      |
| 0.026080504 | Metabolism               |
| 0.17248254  | Metabolism               |
| 0.909893167 | Proliferation/Metastasis |
| 0.199777322 | Metabolism               |
| 0.069817216 | Proliferation/Metastasis |
| 0.955544617 | Metabolism               |
| 3.55E-07    | TME                      |
| 0.81402445  | Metabolism               |
| 0.023439321 | Metabolism               |
| 0.521330066 | Metabolism               |
| 0.000100503 | Metabolism               |
| 8.22E-13    | TME                      |
| 2.03E-09    | TME                      |
| 0.018791474 | Proliferation/Metastasis |
| 0.036877902 | Metabolism               |
| 0.019352231 | Proliferation/Metastasis |
| 0.997669521 | Proliferation/Metastasis |
| 1.30E-06    | TME                      |
| 9.18E-07    | TME                      |
| 7.15E-08    | TME                      |

|             |                          |
|-------------|--------------------------|
| 1.95E-08    | TME                      |
| 1.51E-07    | Metabolism               |
| 8.04E-08    | Proliferation/Metastasis |
| 0.762565367 | Metabolism               |
| 1.82E-10    | Metabolism               |
| 0.092873327 | Proliferation/Metastasis |
| 2.70E-09    | Proliferation/Metastasis |
| 0.023779633 | Metabolism               |
| 7.87E-09    | Metabolism               |
| 1.71E-05    | Metabolism               |
| 2.92E-08    | Metabolism               |
| 4.92E-08    | TME                      |
| 1.60E-07    | TME                      |
| 2.87E-12    | TME                      |
| 1.03E-06    | TME                      |
| 0.491111226 | TME                      |
| 2.50E-06    | Metabolism               |
| 1.30E-05    | Metabolism               |
| 0.759154834 | Metabolism               |
| 0.106121464 | Metabolism               |
| 7.31E-05    | Metabolism               |
| 6.88E-11    | TME                      |
| 0.080588488 | TME                      |
| 5.74E-08    | TME                      |
| 2.48E-05    | TME                      |
| 8.56E-07    | TME                      |
| 4.14E-06    | TME                      |
| 8.37E-07    | TME                      |
| 2.64E-05    | TME                      |
| 9.85E-08    | TME                      |
| 0.000179728 | Proliferation/Metastasis |
| 5.56E-06    | Proliferation/Metastasis |
| 0.014018618 | Metabolism               |
| 3.75E-09    | Metabolism               |
| 3.87E-05    | TME                      |
| 0.578602664 | Metabolism               |
| 0.009880551 | Metabolism               |
| 4.89E-06    | TME                      |
| 0.029472974 | Proliferation/Metastasis |
| 0.479945012 | Proliferation/Metastasis |
| 0.003540519 | TME                      |
| 0.12476058  | Metabolism               |
| 0.128079948 | Metabolism               |

|             |                          |
|-------------|--------------------------|
| 0.233106678 | Proliferation/Metastasis |
| 9.92E-14    | Proliferation/Metastasis |
| 2.74E-08    | TME                      |
| 3.20E-06    | TME                      |
| 8.23E-09    | TME                      |
| 3.10E-08    | TME                      |
| 1.32E-13    | Proliferation/Metastasis |
| 1.04E-11    | TME                      |
| 5.65E-06    | TME                      |
| 0.000823698 | Metabolism               |
| 3.17E-18    | TME                      |
| 1.17E-10    | TME                      |
| 0.000108916 | TME                      |
| 0.230235164 | TME                      |
| 0.00996274  | Metabolism               |
| 4.08E-05    | Metabolism               |
| 2.13E-07    | Metabolism               |
| 1.71E-15    | TME                      |
| 9.32E-06    | Metabolism               |
| 2.28E-07    | TME                      |
| 1.22E-06    | TME                      |
| 5.47E-11    | TME                      |
| 0.115779645 | TME                      |
| 3.94E-07    | TME                      |
| 0.001263261 | Metabolism               |
| 0.003232298 | Proliferation/Metastasis |
| 1.10E-06    | Metabolism               |
| 0.000140393 | Proliferation/Metastasis |
| 4.97E-06    | Metabolism               |
| 0.003432782 | Metabolism               |
| 0.000639112 | Metabolism               |
| 0.008687191 | Metabolism               |
| 1.01E-05    | Metabolism               |
| 0.000715084 | Metabolism               |
| 2.60E-06    | Metabolism               |
| 1.02E-08    | Metabolism               |
| 0.001128582 | Metabolism               |
| 6.43E-11    | Metabolism               |
| 2.60E-06    | Metabolism               |
| 0.016601398 | Metabolism               |
| 0.674626022 | Metabolism               |
| 0.033091756 | Metabolism               |
| 6.75E-05    | TME                      |

|             |                          |
|-------------|--------------------------|
| 4.12E-11    | Proliferation/Metastasis |
| 0.067508524 | Metabolism               |
| 7.98E-14    | Proliferation/Metastasis |
| 1.90E-05    | TME                      |
| 5.38E-16    | Proliferation/Metastasis |
| 8.15E-18    | Proliferation/Metastasis |
| 1.56E-10    | TME                      |
| 0.000586361 | TME                      |
| 1.03E-09    | Metabolism               |
| 1.54E-22    | Metabolism               |
| 4.50E-15    | Proliferation/Metastasis |
| 0.000173396 | Proliferation/Metastasis |
| 1.28E-17    | Proliferation/Metastasis |
| 0.003114409 | Metabolism               |
| 4.71E-05    | Metabolism               |
| 0.350875722 | Metabolism               |
| 6.70E-08    | Proliferation/Metastasis |
| 1.83E-07    | TME                      |
| 6.58E-07    | TME                      |
| 0.000518889 | Metabolism               |
| 9.88E-17    | Proliferation/Metastasis |
| 1.98E-25    | Metabolism               |
| 2.59E-08    | TME                      |
| 9.59E-06    | TME                      |
| 0.006729149 | TME                      |
| 2.09E-13    | TME                      |
| 0.020300909 | Metabolism               |
| 5.19E-05    | TME                      |
| 2.17E-05    | Proliferation/Metastasis |
| 1.36E-06    | TME                      |
| 1.62E-15    | Proliferation/Metastasis |
| 3.79E-21    | Proliferation/Metastasis |
| 9.52E-19    | Metabolism               |
| 0.03635724  | Proliferation/Metastasis |
| 6.11E-08    | TME                      |
| 1.96E-15    | Metabolism               |
| 0.000113898 | TME                      |
| 3.27E-12    | TME                      |
| 3.85E-07    | TME                      |
| 1.29E-07    | TME                      |
| 0.000207502 | TME                      |
| 1.14E-05    | TME                      |
| 9.04E-05    | Metabolism               |

|             |                          |
|-------------|--------------------------|
| 2.61E-07    | TME                      |
| 0.006705298 | Metabolism               |
| 1.34E-10    | Metabolism               |
| 9.83E-14    | Proliferation/Metastasis |
| 0.003510435 | Proliferation/Metastasis |
| 2.10E-06    | Metabolism               |
| 0.005742377 | Metabolism               |
| 8.68E-05    | Metabolism               |
| 0.207488554 | Metabolism               |
| 8.23E-08    | Proliferation/Metastasis |
| 4.24E-10    | Proliferation/Metastasis |
| 1.67E-06    | Metabolism               |
| 2.40E-07    | Metabolism               |
| 8.99E-11    | Metabolism               |
| 2.17E-09    | TME                      |
| 0.002845569 | Metabolism               |
| 0.018555797 | Metabolism               |
| 0.011687239 | Metabolism               |
| 1.72E-08    | Metabolism               |
| 1.91E-24    | Proliferation/Metastasis |
| 4.92E-06    | Metabolism               |
| 0.001071134 | Metabolism               |
| 0.002363221 | Metabolism               |
| 1.61E-07    | Metabolism               |
| 0.887832404 | Metabolism               |
| 0.001161213 | Metabolism               |
| 0.000584309 | Proliferation/Metastasis |
| 0.007504445 | Metabolism               |
| 0.002280591 | Metabolism               |
| 1.40E-11    | Proliferation/Metastasis |
| 3.69E-09    | Metabolism               |
| 0.00017954  | Metabolism               |
| 5.09E-12    | Metabolism               |
| 0.026213056 | Metabolism               |
| 0.634127027 | Metabolism               |
| 0.009796665 | Metabolism               |
| 1.06E-06    | Metabolism               |
| 0.187247083 | Metabolism               |
| 7.86E-09    | TME                      |
| 0.00076546  | TME                      |
| 0.000728331 | TME                      |
| 2.26E-08    | TME                      |
| 9.57E-06    | TME                      |

|             |                          |
|-------------|--------------------------|
| 8.31E-07    | Metabolism               |
| 0.004970352 | Metabolism               |
| 0.000257878 | Proliferation/Metastasis |
| 0.265719512 | Metabolism               |
| 5.54E-11    | Proliferation/Metastasis |
| 1.42E-05    | Metabolism               |
| 0.909839092 | TME                      |
| 0.026105473 | Metabolism               |
| 0.006779065 | Metabolism               |
| 0.021336545 | Metabolism               |
| 0.00573094  | Metabolism               |
| 8.88E-13    | TME                      |
| 1.90E-07    | TME                      |
| 2.28E-06    | Proliferation/Metastasis |
| 0.00317509  | Metabolism               |
| 0.57325172  | Proliferation/Metastasis |
| 0.372122255 | Proliferation/Metastasis |
| 0.006435397 | TME                      |
| 0.007645271 | TME                      |
| 0.135245885 | TME                      |
| 0.0102851   | TME                      |
| 0.000327881 | Metabolism               |
| 0.252998301 | Proliferation/Metastasis |
| 0.236983552 | Metabolism               |
| 0.938751441 | Metabolism               |
| 0.247880964 | Proliferation/Metastasis |
| 0.055641038 | Proliferation/Metastasis |
| 0.019576744 | Metabolism               |
| 0.449222059 | Metabolism               |
| 0.022917618 | Metabolism               |
| 1.94E-06    | Metabolism               |
| 0.025006206 | TME                      |
| 0.012347433 | TME                      |
| 0.852186082 | TME                      |
| 0.004751667 | TME                      |
| 8.01E-09    | TME                      |
| 2.30E-05    | Metabolism               |
| 8.06E-05    | Metabolism               |
| 0.027870526 | Metabolism               |
| 6.44E-05    | Metabolism               |
| 0.000811937 | Metabolism               |
| 0.138804373 | TME                      |
| 0.013985191 | TME                      |

|             |                          |
|-------------|--------------------------|
| 6.86E-05    | TME                      |
| 0.157748023 | TME                      |
| 0.025949621 | TME                      |
| 0.019818403 | TME                      |
| 0.019597385 | TME                      |
| 0.002543325 | TME                      |
| 0.034754103 | TME                      |
| 0.755942024 | Proliferation/Metastasis |
| 6.95E-06    | Proliferation/Metastasis |
| 0.02586894  | Metabolism               |
| 0.001321416 | Metabolism               |
| 0.000198659 | TME                      |
| 0.00039536  | Metabolism               |
| 7.49E-10    | Metabolism               |
| 0.067984019 | TME                      |
| 1.58E-05    | Proliferation/Metastasis |
| 0.103692158 | Proliferation/Metastasis |
| 0.050341999 | TME                      |
| 0.210173836 | Metabolism               |
| 0.013073153 | Metabolism               |
| 0.57257389  | Proliferation/Metastasis |
| 0.186129192 | Proliferation/Metastasis |
| 0.762507297 | TME                      |
| 0.005524287 | TME                      |
| 0.025731564 | TME                      |
| 0.199406823 | TME                      |
| 0.091541708 | Proliferation/Metastasis |
| 0.042932577 | TME                      |
| 0.008634918 | TME                      |
| 0.417717712 | Metabolism               |
| 0.277297428 | TME                      |
| 0.026335797 | TME                      |
| 0.003882929 | TME                      |
| 0.798141668 | TME                      |
| 0.137164601 | Metabolism               |
| 0.000157028 | Metabolism               |
| 0.031229489 | Metabolism               |
| 0.034434693 | TME                      |
| 0.752870184 | Metabolism               |
| 0.079035559 | TME                      |
| 0.216116594 | TME                      |
| 0.89982118  | TME                      |
| 0.002250996 | TME                      |



|             |                          |
|-------------|--------------------------|
| 0.822981309 | TME                      |
| 0.086712195 | Metabolism               |
| 0.967142419 | Proliferation/Metastasis |
| 0.062315207 | Metabolism               |
| 0.529785553 | Proliferation/Metastasis |
| 0.013742537 | Metabolism               |
| 0.05907048  | Metabolism               |
| 0.016815109 | Metabolism               |
| 0.017770236 | Metabolism               |
| 0.025628956 | Metabolism               |
| 2.30E-11    | Metabolism               |
| 0.00135214  | Metabolism               |
| 4.69E-13    | Metabolism               |
| 0.162393367 | Metabolism               |
| 0.000498543 | Metabolism               |
| 0.000248519 | Metabolism               |
| 4.47E-06    | Metabolism               |
| 0.008557581 | Metabolism               |
| 0.004998169 | Metabolism               |
| 0.146960902 | TME                      |
| 0.063014322 | Proliferation/Metastasis |
| 3.49E-05    | Metabolism               |
| 0.000214651 | Proliferation/Metastasis |
| 0.030173583 | TME                      |
| 0.000209129 | Proliferation/Metastasis |
| 0.06684521  | Proliferation/Metastasis |
| 0.09965158  | TME                      |
| 2.69E-05    | TME                      |
| 4.35E-06    | Metabolism               |
| 0.000102178 | Metabolism               |
| 0.237577235 | Proliferation/Metastasis |
| 0.042771144 | Proliferation/Metastasis |
| 0.024122143 | Proliferation/Metastasis |
| 0.216015724 | Metabolism               |
| 0.615537391 | Metabolism               |
| 1.60E-12    | Metabolism               |
| 0.618380776 | Proliferation/Metastasis |
| 0.045123881 | TME                      |
| 0.117292109 | TME                      |
| 0.003664987 | Metabolism               |
| 0.037350302 | Proliferation/Metastasis |
| 5.97E-05    | Metabolism               |
| 0.06146419  | TME                      |

|             |                          |
|-------------|--------------------------|
| 0.17757756  | TME                      |
| 2.17E-06    | TME                      |
| 0.190944526 | TME                      |
| 0.621908619 | Metabolism               |
| 0.00010726  | TME                      |
| 2.90E-06    | Proliferation/Metastasis |
| 4.32E-05    | TME                      |
| 0.077250628 | Proliferation/Metastasis |
| 0.544558504 | Proliferation/Metastasis |
| 9.51E-06    | Metabolism               |
| 0.012001544 | Proliferation/Metastasis |
| 0.302776342 | TME                      |
| 0.196880479 | Metabolism               |
| 0.069083819 | TME                      |
| 0.37798159  | TME                      |
| 0.187357058 | TME                      |
| 0.005082401 | TME                      |
| 0.025841166 | TME                      |
| 0.088657226 | TME                      |
| 0.002297613 | Metabolism               |
| 1.64E-05    | TME                      |
| 0.042298106 | Metabolism               |
| 0.005398649 | Metabolism               |
| 0.566076495 | Proliferation/Metastasis |
| 0.020116345 | Proliferation/Metastasis |
| 0.000731514 | Metabolism               |
| 0.016026691 | Metabolism               |
| 1.62E-08    | Metabolism               |
| 0.002445611 | Metabolism               |
| 5.69E-10    | Proliferation/Metastasis |
| 0.477796601 | Proliferation/Metastasis |
| 0.010372031 | Metabolism               |
| 0.000785782 | Metabolism               |
| 0.828081445 | Metabolism               |
| 0.003582246 | TME                      |
| 0.083940564 | Metabolism               |
| 0.408823    | Metabolism               |
| 5.18E-06    | Metabolism               |
| 0.3494749   | Metabolism               |
| 0.775101609 | Proliferation/Metastasis |
| 0.322831385 | Metabolism               |
| 0.017980033 | Metabolism               |
| 1.57E-07    | Metabolism               |

|             |                          |
|-------------|--------------------------|
| 0.010321734 | Metabolism               |
| 0.004867788 | Metabolism               |
| 0.008152971 | Metabolism               |
| 0.003016129 | Proliferation/Metastasis |
| 0.040920587 | Metabolism               |
| 0.50720834  | Metabolism               |
| 0.06707825  | Proliferation/Metastasis |
| 6.94E-08    | Metabolism               |
| 1.17E-13    | Metabolism               |
| 5.26E-09    | Metabolism               |
| 0.635758705 | Metabolism               |
| 0.168024123 | Metabolism               |
| 0.016435169 | Metabolism               |
| 0.023498516 | Metabolism               |
| 0.001331439 | Metabolism               |
| 0.36032877  | TME                      |
| 0.096198382 | TME                      |
| 0.029504566 | TME                      |
| 0.561335066 | TME                      |
| 4.82E-05    | TME                      |
| 0.010978798 | Metabolism               |
| 0.006034849 | Metabolism               |
| 0.016594603 | Proliferation/Metastasis |
| 0.8369729   | Metabolism               |
| 0.00030262  | Proliferation/Metastasis |
| 0.001511206 | Metabolism               |
| 0.122477272 | TME                      |
| 0.697792743 | Metabolism               |
| 0.037931179 | Metabolism               |
| 0.033203206 | Metabolism               |
| 3.83E-05    | Metabolism               |
| 7.03E-05    | TME                      |
| 0.018245234 | TME                      |
| 0.023648659 | Proliferation/Metastasis |
| 0.090792745 | Metabolism               |
| 0.230680055 | Proliferation/Metastasis |
| 0.001478789 | Proliferation/Metastasis |
| 0.041031239 | TME                      |
| 0.284152949 | TME                      |
| 0.915111967 | TME                      |
| 0.937006071 | TME                      |
| 0.00010483  | Metabolism               |
| 0.060660998 | Proliferation/Metastasis |

|             |                          |
|-------------|--------------------------|
| 0.053044007 | Metabolism               |
| 0.826998601 | Metabolism               |
| 0.155086933 | Proliferation/Metastasis |
| 0.532609036 | Proliferation/Metastasis |
| 0.003676265 | Metabolism               |
| 0.005018256 | Metabolism               |
| 0.003920425 | Metabolism               |
| 0.002336516 | Metabolism               |
| 0.008194865 | TME                      |
| 0.07400639  | TME                      |
| 0.007902245 | TME                      |
| 0.354679633 | TME                      |
| 1.04E-05    | TME                      |
| 2.15E-07    | Metabolism               |
| 0.002408175 | Metabolism               |
| 0.793675106 | Metabolism               |
| 1.62E-10    | Metabolism               |
| 0.003923685 | Metabolism               |
| 0.256695828 | TME                      |
| 8.29E-07    | TME                      |
| 0.582112079 | TME                      |
| 0.884421441 | TME                      |
| 0.446345895 | TME                      |
| 0.160134109 | TME                      |
| 0.24108679  | TME                      |
| 0.224124445 | TME                      |
| 0.629058171 | TME                      |
| 4.62E-08    | Proliferation/Metastasis |
| 0.000154862 | Proliferation/Metastasis |
| 3.67E-06    | Metabolism               |
| 0.006741353 | Metabolism               |
| 0.647249374 | TME                      |
| 3.91E-11    | Metabolism               |
| 7.01E-05    | Metabolism               |
| 0.115443833 | TME                      |
| 0.753813075 | Proliferation/Metastasis |
| 0.033537542 | Proliferation/Metastasis |
| 0.637003143 | TME                      |
| 5.40E-07    | Metabolism               |
| 0.000467652 | Metabolism               |
| 5.40E-06    | Proliferation/Metastasis |
| 3.37E-05    | Proliferation/Metastasis |
| 0.723087741 | TME                      |

|             |                          |
|-------------|--------------------------|
| 0.158066875 | TME                      |
| 0.284492838 | TME                      |
| 0.839034388 | TME                      |
| 0.002016037 | Proliferation/Metastasis |
| 0.000115086 | TME                      |
| 0.059961626 | TME                      |
| 1.33E-05    | Metabolism               |
| 0.748475611 | TME                      |
| 0.87995407  | TME                      |
| 0.079296707 | TME                      |
| 9.89E-05    | TME                      |
| 0.060773888 | Metabolism               |
| 1.82E-06    | Metabolism               |
| 0.001199304 | Metabolism               |
| 0.012186135 | TME                      |
| 0.029389304 | Metabolism               |
| 0.524826706 | TME                      |
| 0.183992945 | TME                      |
| 0.005069682 | TME                      |
| 0.291786203 | TME                      |
| 0.000450719 | TME                      |
| 0.165394364 | Metabolism               |
| 6.02E-10    | Proliferation/Metastasis |
| 0.074403598 | Metabolism               |
| 0.000180469 | Proliferation/Metastasis |
| 0.233115244 | Metabolism               |
| 0.001455185 | Metabolism               |
| 1.19E-05    | Metabolism               |
| 1.36E-13    | Metabolism               |
| 0.00138865  | Metabolism               |
| 0.085422736 | Metabolism               |
| 0.000442178 | Metabolism               |
| 5.87E-06    | Metabolism               |
| 0.007388129 | Metabolism               |
| 0.003075712 | Metabolism               |
| 0.11295748  | Metabolism               |
| 0.359309291 | Metabolism               |
| 0.086543012 | Metabolism               |
| 1.64E-09    | Metabolism               |
| 0.001894643 | TME                      |
| 0.000467299 | Proliferation/Metastasis |
| 1.86E-14    | Metabolism               |
| 0.011615324 | Proliferation/Metastasis |

|             |                          |
|-------------|--------------------------|
| 0.255012686 | TME                      |
| 0.559092227 | Proliferation/Metastasis |
| 0.751663617 | Proliferation/Metastasis |
| 0.506797063 | TME                      |
| 0.121367709 | TME                      |
| 0.012147778 | Metabolism               |
| 0.205918647 | Metabolism               |
| 0.096722684 | Proliferation/Metastasis |
| 0.004160776 | Proliferation/Metastasis |
| 0.762148949 | Proliferation/Metastasis |
| 0.034864234 | Metabolism               |
| 0.083969772 | Metabolism               |
| 2.02E-05    | Metabolism               |
| 0.000407464 | Proliferation/Metastasis |
| 0.649586391 | TME                      |
| 0.001215773 | TME                      |
| 0.972805529 | Metabolism               |
| 2.54E-05    | Proliferation/Metastasis |
| 0.008554042 | Metabolism               |
| 0.93819959  | TME                      |
| 0.975221366 | TME                      |
| 0.087302947 | TME                      |
| 0.525118597 | TME                      |
| 0.000713672 | Metabolism               |
| 0.09750025  | TME                      |
| 1.30E-05    | Proliferation/Metastasis |
| 0.120054615 | TME                      |
| 0.089996543 | Proliferation/Metastasis |
| 0.016961569 | Proliferation/Metastasis |
| 0.228645988 | Metabolism               |
| 0.01287515  | Proliferation/Metastasis |
| 0.034736222 | TME                      |
| 1.11E-05    | Metabolism               |
| 0.459524372 | TME                      |
| 0.26470591  | TME                      |
| 0.071103594 | TME                      |
| 0.171511333 | TME                      |
| 0.232618083 | TME                      |
| 0.325970289 | TME                      |
| 0.03268112  | Metabolism               |
| 0.200263125 | TME                      |
| 2.39E-11    | Metabolism               |
| 0.352133895 | Metabolism               |

|             |                          |
|-------------|--------------------------|
| 0.073793381 | Proliferation/Metastasis |
| 1.36E-07    | Proliferation/Metastasis |
| 0.079962363 | Metabolism               |
| 0.004003805 | Metabolism               |
| 0.678309918 | Metabolism               |
| 7.25E-05    | Metabolism               |
| 0.399719389 | Proliferation/Metastasis |
| 0.000378077 | Proliferation/Metastasis |
| 2.89E-05    | Metabolism               |
| 0.002935114 | Metabolism               |
| 0.817914938 | Metabolism               |
| 0.170306539 | TME                      |
| 6.75E-10    | Metabolism               |
| 0.002835768 | Metabolism               |
| 0.100977436 | Metabolism               |
| 0.004237872 | Metabolism               |
| 0.626473033 | Proliferation/Metastasis |
| 0.000131104 | Metabolism               |
| 3.36E-07    | Metabolism               |
| 3.95E-06    | Metabolism               |
| 0.205159806 | Metabolism               |
| 0.867259085 | Metabolism               |
| 2.55E-06    | Metabolism               |
| 0.003995688 | Proliferation/Metastasis |
| 3.76E-05    | Metabolism               |
| 0.000137405 | Metabolism               |
| 0.988138443 | Proliferation/Metastasis |
| 0.0002174   | Metabolism               |
| 0.457918824 | Metabolism               |
| 0.019098643 | Metabolism               |
| 0.000161868 | Metabolism               |
| 0.452812956 | Metabolism               |
| 0.003946961 | Metabolism               |
| 0.000348361 | Metabolism               |
| 2.22E-08    | Metabolism               |
| 0.02377306  | TME                      |
| 4.39E-06    | TME                      |
| 0.268219086 | TME                      |
| 0.031376629 | TME                      |
| 0.241775338 | TME                      |
| 0.843398463 | Metabolism               |
| 0.47562482  | Metabolism               |
| 5.49E-07    | Proliferation/Metastasis |

|             |                          |
|-------------|--------------------------|
| 1.32E-09    | Metabolism               |
| 0.631641563 | Proliferation/Metastasis |
| 1.77E-07    | Metabolism               |
| 6.46E-05    | TME                      |
| 1.18E-05    | Metabolism               |
| 0.007628919 | Metabolism               |
| 5.00E-07    | Metabolism               |
| 7.35E-08    | Metabolism               |
| 0.000166572 | TME                      |
| 6.15E-05    | TME                      |
| 0.292015436 | Proliferation/Metastasis |
| 4.24E-05    | Metabolism               |
| 0.000672757 | Proliferation/Metastasis |
| 1.70E-07    | Proliferation/Metastasis |
| 9.75E-05    | TME                      |
| 7.06E-12    | TME                      |
| 0.137435164 | TME                      |
| 0.000271407 | TME                      |
| 0.003258046 | Metabolism               |
| 1.32E-07    | Proliferation/Metastasis |
| 0.243896863 | Metabolism               |
| 0.008967632 | Metabolism               |
| 0.147229717 | Proliferation/Metastasis |
| 6.85E-13    | Proliferation/Metastasis |
| 2.02E-07    | Metabolism               |
| 0.004104437 | Metabolism               |
| 0.038175613 | Metabolism               |
| 0.083108297 | Metabolism               |
| 2.83E-06    | TME                      |
| 1.35E-05    | TME                      |
| 0.000789781 | TME                      |
| 0.032345988 | TME                      |
| 1.01E-16    | TME                      |
| 0.128571892 | Metabolism               |
| 0.766220712 | Metabolism               |
| 0.03939136  | Metabolism               |
| 0.384732753 | Metabolism               |
| 0.313707301 | Metabolism               |
| 1.99E-06    | TME                      |
| 1.11E-15    | TME                      |
| 4.57E-05    | TME                      |
| 0.001824185 | TME                      |
| 0.00042732  | TME                      |



|             |                          |
|-------------|--------------------------|
| 0.018284516 | TME                      |
| 0.007244622 | TME                      |
| 4.78E-05    | TME                      |
| 0.01080178  | TME                      |
| 0.118019066 | Proliferation/Metastasis |
| 4.55E-06    | Proliferation/Metastasis |
| 0.016518788 | Metabolism               |
| 0.088208283 | Metabolism               |
| 2.57E-05    | TME                      |
| 0.152131285 | Metabolism               |
| 3.59E-07    | Metabolism               |
| 0.002137021 | TME                      |
| 0.000236434 | Proliferation/Metastasis |
| 0.57144474  | Proliferation/Metastasis |
| 0.000159104 | TME                      |
| 0.002730588 | Metabolism               |
| 1.88E-06    | Metabolism               |
| 0.197264981 | Proliferation/Metastasis |
| 3.72E-06    | Proliferation/Metastasis |
| 0.880863153 | TME                      |
| 0.002784624 | TME                      |
| 0.193088668 | TME                      |
| 0.001073067 | TME                      |
| 0.916992507 | Proliferation/Metastasis |
| 4.30E-13    | TME                      |
| 0.005298901 | TME                      |
| 0.10902802  | Metabolism               |
| 0.191526534 | TME                      |
| 8.14E-05    | TME                      |
| 0.00119195  | TME                      |
| 1.07E-05    | TME                      |
| 2.18E-07    | Metabolism               |
| 0.001794925 | Metabolism               |
| 0.026330402 | Metabolism               |
| 3.80E-11    | TME                      |
| 0.249614583 | Metabolism               |
| 0.0114089   | TME                      |
| 0.017307426 | TME                      |
| 0.013387572 | TME                      |
| 0.000770353 | TME                      |
| 0.159968763 | TME                      |
| 5.13E-05    | Metabolism               |
| 0.028313253 | Proliferation/Metastasis |

|             |                          |
|-------------|--------------------------|
| 2.78E-09    | Metabolism               |
| 0.238352464 | Proliferation/Metastasis |
| 6.72E-10    | Metabolism               |
| 0.946936464 | Metabolism               |
| 0.909774815 | Metabolism               |
| 0.016584419 | Metabolism               |
| 0.000277968 | Metabolism               |
| 2.85E-10    | Metabolism               |
| 0.000766084 | Metabolism               |
| 0.041380743 | Metabolism               |
| 7.41E-05    | Metabolism               |
| 0.014900342 | Metabolism               |
| 2.62E-05    | Metabolism               |
| 0.569378395 | Metabolism               |
| 0.359836172 | Metabolism               |
| 0.01750759  | Metabolism               |
| 0.002137264 | TME                      |
| 0.791992589 | Proliferation/Metastasis |
| 0.99477861  | Metabolism               |
| 4.35E-14    | Proliferation/Metastasis |
| 8.33E-05    | TME                      |
| 8.54E-10    | Proliferation/Metastasis |
| 8.37E-05    | Proliferation/Metastasis |
| 0.348768174 | TME                      |
| 0.000907567 | TME                      |
| 0.000338091 | Metabolism               |
| 0.935097929 | Metabolism               |
| 0.165864189 | Proliferation/Metastasis |
| 0.102088572 | Proliferation/Metastasis |
| 0.000381515 | Proliferation/Metastasis |
| 0.39602486  | Metabolism               |
| 0.037296892 | Metabolism               |
| 0.055034447 | Metabolism               |
| 2.82E-06    | Proliferation/Metastasis |
| 0.00097421  | TME                      |
| 0.000141496 | TME                      |
| 0.107436474 | Metabolism               |
| 0.342102503 | Proliferation/Metastasis |
| 0.162256632 | Metabolism               |
| 0.16403938  | TME                      |
| 0.791199313 | TME                      |
| 1.66E-11    | TME                      |
| 3.46E-11    | TME                      |

|             |                          |
|-------------|--------------------------|
| 0.000548517 | Metabolism               |
| 0.074218894 | TME                      |
| 7.02E-06    | Proliferation/Metastasis |
| 2.53E-06    | TME                      |
| 0.070929036 | Proliferation/Metastasis |
| 0.008854066 | Proliferation/Metastasis |
| 0.014369877 | Metabolism               |
| 0.139359802 | Proliferation/Metastasis |
| 0.000162405 | TME                      |
| 0.335305552 | Metabolism               |
| 0.00023168  | TME                      |
| 0.000470688 | TME                      |
| 0.007672763 | TME                      |
| 0.000255541 | TME                      |
| 3.24E-08    | TME                      |
| 0.000108376 | TME                      |
| 0.16045379  | Metabolism               |
| 4.53E-08    | TME                      |
| 0.027999481 | Metabolism               |
| 0.222316296 | Metabolism               |
| 0.573101316 | Proliferation/Metastasis |
| 0.432091484 | Proliferation/Metastasis |
| 0.922194142 | Metabolism               |
| 5.08E-05    | Metabolism               |
| 0.148397689 | Metabolism               |
| 3.85E-09    | Metabolism               |
| 7.45E-19    | Proliferation/Metastasis |
| 0.000684066 | Proliferation/Metastasis |
| 0.203186893 | Metabolism               |
| 0.773811138 | Metabolism               |
| 0.005291249 | Metabolism               |
| 1.02E-30    | TME                      |
| 0.021056405 | Metabolism               |
| 0.291528729 | Metabolism               |
| 0.003535332 | Metabolism               |
| 0.396462569 | Metabolism               |
| 0.183190137 | Proliferation/Metastasis |
| 0.010110937 | Metabolism               |
| 0.5141126   | Metabolism               |
| 0.258660833 | Metabolism               |
| 0.094589683 | Metabolism               |
| 0.046305602 | Metabolism               |
| 0.135439298 | Metabolism               |

|             |                          |
|-------------|--------------------------|
| 0.018067159 | Proliferation/Metastasis |
| 0.852608209 | Metabolism               |
| 0.006373932 | Metabolism               |
| 0.38809591  | Proliferation/Metastasis |
| 0.111223467 | Metabolism               |
| 6.11E-06    | Metabolism               |
| 0.482220532 | Metabolism               |
| 0.001317645 | Metabolism               |
| 0.049202836 | Metabolism               |
| 0.316717284 | Metabolism               |
| 0.000101724 | Metabolism               |
| 0.78610697  | Metabolism               |
| 5.79E-08    | TME                      |
| 0.000422314 | TME                      |
| 0.045429881 | TME                      |
| 0.000333393 | TME                      |
| 7.88E-05    | TME                      |
| 0.163457591 | Metabolism               |
| 0.878539253 | Metabolism               |
| 0.018438763 | Proliferation/Metastasis |
| 0.307658344 | Metabolism               |
| 0.000187201 | Proliferation/Metastasis |
| 0.001932662 | Metabolism               |
| 0.027968309 | TME                      |
| 0.000626801 | Metabolism               |
| 1.01E-06    | Metabolism               |
| 4.11E-09    | Metabolism               |
| 0.460747934 | Metabolism               |
| 2.01E-22    | TME                      |
| 8.22E-11    | TME                      |
| 0.227527914 | Proliferation/Metastasis |
| 0.397229967 | Metabolism               |
| 0.279363192 | Proliferation/Metastasis |
| 0.660352154 | Proliferation/Metastasis |
| 0.630363121 | TME                      |
| 8.05E-05    | TME                      |
| 0.000622511 | TME                      |
| 4.06E-07    | TME                      |
| 0.087966427 | Metabolism               |
| 1.21E-07    | Proliferation/Metastasis |
| 0.002706976 | Metabolism               |
| 0.007631233 | Metabolism               |
| 0.039044645 | Proliferation/Metastasis |

|             |                          |
|-------------|--------------------------|
| 1.06E-15    | Proliferation/Metastasis |
| 0.00049018  | Metabolism               |
| 0.90421865  | Metabolism               |
| 0.005843693 | Metabolism               |
| 4.61E-08    | Metabolism               |
| 0.006076647 | TME                      |
| 6.28E-07    | TME                      |
| 0.009986267 | TME                      |
| 1.88E-12    | TME                      |
| 0.208610406 | TME                      |
| 0.029998887 | Metabolism               |
| 0.017227643 | Metabolism               |
| 0.85542745  | Metabolism               |
| 1.35E-05    | Metabolism               |
| 0.018443013 | Metabolism               |
| 3.46E-07    | TME                      |
| 0.002091791 | TME                      |
| 0.000251558 | TME                      |
| 9.99E-12    | TME                      |
| 0.285017357 | TME                      |
| 0.002397234 | TME                      |
| 0.000522467 | TME                      |
| 2.67E-07    | TME                      |
| 2.06E-16    | TME                      |
| 0.965339798 | Proliferation/Metastasis |
| 0.0021493   | Proliferation/Metastasis |
| 0.692023607 | Metabolism               |
| 0.00257354  | Metabolism               |
| 0.000401723 | TME                      |
| 2.37E-05    | Metabolism               |
| 0.886709963 | Metabolism               |
| 0.000499053 | TME                      |
| 7.46E-30    | Proliferation/Metastasis |
| 1.72E-05    | Proliferation/Metastasis |
| 0.056046519 | TME                      |
| 0.000686922 | Metabolism               |
| 8.80E-25    | Metabolism               |
| 0.274807215 | Proliferation/Metastasis |
| 8.41E-24    | Proliferation/Metastasis |
| 1.33E-07    | TME                      |
| 1.11E-09    | TME                      |
| 0.949954837 | TME                      |
| 0.000354516 | TME                      |

|             |                          |
|-------------|--------------------------|
| 2.49E-16    | Proliferation/Metastasis |
| 2.03E-06    | TME                      |
| 0.251377013 | TME                      |
| 0.163818327 | Metabolism               |
| 2.87E-07    | TME                      |
| 3.10E-05    | TME                      |
| 0.003755107 | TME                      |
| 0.774800171 | TME                      |
| 0.076805938 | Metabolism               |
| 3.32E-09    | Metabolism               |
| 0.384196256 | Metabolism               |
| 2.73E-09    | TME                      |
| 1.69E-07    | Metabolism               |
| 0.012088521 | TME                      |
| 0.000152069 | TME                      |
| 1.09E-05    | TME                      |
| 0.015445452 | TME                      |
| 0.29971083  | TME                      |
| 0.000126461 | Metabolism               |
| 0.379764545 | Proliferation/Metastasis |
| 0.406100424 | Metabolism               |
| 0.954748816 | Proliferation/Metastasis |
| 0.000182324 | Metabolism               |
| 0.307474667 | Metabolism               |
| 0.008592076 | Metabolism               |
| 3.93E-19    | Metabolism               |
| 0.592020796 | Metabolism               |
| 0.105300814 | Metabolism               |
| 1.88E-11    | Metabolism               |
| 0.000259558 | Metabolism               |
| 2.70E-06    | Metabolism               |
| 1.60E-14    | Metabolism               |
| 1.30E-11    | Metabolism               |
| 0.190307931 | Metabolism               |
| 0.030263771 | Metabolism               |
| 4.93E-12    | Metabolism               |
| 0.052769463 | TME                      |
| 9.09E-10    | Proliferation/Metastasis |
| 0.084024251 | Metabolism               |
| 1.86E-08    | Proliferation/Metastasis |
| 8.17E-12    | TME                      |
| 1.85E-09    | Proliferation/Metastasis |
| 2.54E-11    | Proliferation/Metastasis |

|             |                          |
|-------------|--------------------------|
| 2.78E-14    | TME                      |
| 0.770671242 | TME                      |
| 1.07E-15    | Metabolism               |
| 7.13E-20    | Metabolism               |
| 0.000327563 | Proliferation/Metastasis |
| 0.064576853 | Proliferation/Metastasis |
| 9.15E-17    | Proliferation/Metastasis |
| 0.529735998 | Metabolism               |
| 1.35E-15    | Metabolism               |
| 3.92E-06    | Metabolism               |
| 0.000192051 | Proliferation/Metastasis |
| 0.050979597 | TME                      |
| 0.015783945 | TME                      |
| 0.00145443  | Metabolism               |
| 8.22E-25    | Proliferation/Metastasis |
| 1.97E-21    | Metabolism               |
| 0.938053094 | TME                      |
| 0.0041473   | TME                      |
| 0.026193422 | TME                      |
| 4.29E-06    | TME                      |
| 5.55E-07    | Metabolism               |
| 0.00228753  | TME                      |
| 1.04E-07    | Proliferation/Metastasis |
| 0.00358329  | TME                      |
| 0.012665235 | Proliferation/Metastasis |
| 0.001528974 | Proliferation/Metastasis |
| 2.01E-34    | Metabolism               |
| 4.10E-13    | Proliferation/Metastasis |
| 0.003434715 | TME                      |
| 0.000290239 | Metabolism               |
| 5.01E-08    | TME                      |
| 0.063616813 | TME                      |
| 0.033190043 | TME                      |
| 0.000536211 | TME                      |
| 0.012637771 | TME                      |
| 1.10E-05    | TME                      |
| 7.55E-08    | Metabolism               |
| 0.006559722 | TME                      |
| 0.142120492 | Metabolism               |
| 0.47902137  | Metabolism               |
| 7.10E-07    | Proliferation/Metastasis |
| 0.000613114 | Proliferation/Metastasis |
| 1.11E-08    | Metabolism               |

|             |                          |
|-------------|--------------------------|
| 0.223454678 | Metabolism               |
| 1.64E-12    | Metabolism               |
| 6.02E-12    | Metabolism               |
| 0.383861716 | Proliferation/Metastasis |
| 0.006654622 | Proliferation/Metastasis |
| 3.23E-11    | Metabolism               |
| 0.001583551 | Metabolism               |
| 2.35E-11    | Metabolism               |
| 9.33E-07    | TME                      |
| 1.24E-05    | Metabolism               |
| 0.103454819 | Metabolism               |
| 0.002763848 | Metabolism               |
| 5.39E-06    | Metabolism               |
| 1.11E-19    | Proliferation/Metastasis |
| 3.47E-10    | Metabolism               |
| 0.925309312 | Metabolism               |
| 0.107460711 | Metabolism               |
| 4.78E-07    | Metabolism               |
| 4.00E-20    | Metabolism               |
| 0.006901352 | Metabolism               |
| 0.457784017 | Proliferation/Metastasis |
| 0.010013337 | Metabolism               |
| 0.003460324 | Metabolism               |
| 0.126839828 | Proliferation/Metastasis |
| 0.127637867 | Metabolism               |
| 0.022356943 | Metabolism               |
| 3.04E-10    | Metabolism               |
| 0.000901309 | Metabolism               |
| 0.048584595 | Metabolism               |
| 0.005345589 | Metabolism               |
| 3.29E-16    | Metabolism               |
| 0.000839578 | Metabolism               |
| 2.75E-07    | TME                      |
| 3.35E-06    | TME                      |
| 2.13E-09    | TME                      |
| 0.002801134 | TME                      |
| 2.30E-05    | TME                      |
| 0.239939438 | Metabolism               |
| 1.21E-05    | Metabolism               |
| 0.006142687 | Proliferation/Metastasis |
| 0.000300078 | Metabolism               |
| 7.99E-11    | Proliferation/Metastasis |
| 0.217574171 | Metabolism               |



|             |                          |
|-------------|--------------------------|
| 0.223626341 | TME                      |
| 0.100253421 | Metabolism               |
| 0.000672485 | Metabolism               |
| 0.001108672 | Metabolism               |
| 9.06E-10    | Metabolism               |
| 5.85E-05    | TME                      |
| 1.95E-07    | TME                      |
| 0.000401236 | Proliferation/Metastasis |
| 0.913048477 | Metabolism               |
| 2.66E-08    | Proliferation/Metastasis |
| 0.010297389 | Proliferation/Metastasis |
| 0.001339532 | TME                      |
| 7.16E-06    | TME                      |
| 1.81E-05    | TME                      |
| 3.41E-05    | TME                      |
| 4.99E-12    | Metabolism               |
| 0.185518428 | Proliferation/Metastasis |
| 4.54E-42    | Metabolism               |
| 0.001153243 | Metabolism               |
| 5.51E-14    | Proliferation/Metastasis |
| 0.214990033 | Proliferation/Metastasis |
| 3.46E-39    | Metabolism               |
| 8.54E-23    | Metabolism               |
| 5.88E-07    | Metabolism               |
| 2.21E-06    | Metabolism               |
| 0.00042479  | TME                      |
| 5.20E-20    | TME                      |
| 1.12E-06    | TME                      |
| 0.0718332   | TME                      |
| 1.83E-05    | TME                      |
| 8.60E-32    | Metabolism               |
| 1.19E-07    | Metabolism               |
| 4.70E-05    | Metabolism               |
| 6.26E-17    | Metabolism               |
| 0.632358883 | Metabolism               |
| 0.185426774 | TME                      |
| 0.03389963  | TME                      |
| 6.72E-10    | TME                      |
| 0.000434011 | TME                      |
| 0.006799539 | TME                      |
| 1.11E-05    | TME                      |
| 0.000200887 | TME                      |
| 0.520137038 | TME                      |

|             |                          |
|-------------|--------------------------|
| 0.446110852 | TME                      |
| 4.12E-40    | Proliferation/Metastasis |
| 4.21E-24    | Proliferation/Metastasis |
| 0.122487544 | Metabolism               |
| 1.22E-25    | Metabolism               |
| 0.269713679 | TME                      |
| 1.29E-05    | Metabolism               |
| 0.003335131 | Metabolism               |
| 2.64E-06    | TME                      |
| 1.59E-15    | Proliferation/Metastasis |
| 2.51E-23    | Proliferation/Metastasis |
| 0.000117653 | TME                      |
| 6.24E-33    | Metabolism               |
| 0.160531624 | Metabolism               |
| 2.47E-35    | Proliferation/Metastasis |
| 0.848675359 | Proliferation/Metastasis |
| 3.73E-05    | TME                      |
| 2.00E-12    | TME                      |
| 1.39E-09    | TME                      |
| 0.609775076 | TME                      |
| 7.84E-07    | Proliferation/Metastasis |
| 0.17709168  | TME                      |
| 4.08E-08    | TME                      |
| 2.19E-30    | Metabolism               |
| 0.000136186 | TME                      |
| 0.000215008 | TME                      |
| 0.000126785 | TME                      |
| 3.88E-11    | TME                      |
| 0.00012857  | Metabolism               |
| 7.65E-30    | Metabolism               |
| 1.78E-13    | Metabolism               |
| 0.271755417 | TME                      |
| 2.38E-05    | Metabolism               |
| 9.29E-07    | TME                      |
| 0.009622567 | TME                      |
| 0.00019078  | TME                      |
| 0.837773021 | TME                      |
| 3.47E-06    | TME                      |
| 6.13E-11    | Metabolism               |
| 7.76E-44    | Proliferation/Metastasis |
| 0.022959514 | Metabolism               |
| 0.000340946 | Proliferation/Metastasis |
| 1.23E-12    | Metabolism               |

|             |                          |
|-------------|--------------------------|
| 1.52E-11    | Metabolism               |
| 9.66E-26    | Metabolism               |
| 2.18E-16    | Metabolism               |
| 3.23E-12    | Metabolism               |
| 0.001724531 | Metabolism               |
| 0.182970856 | Metabolism               |
| 5.80E-10    | Metabolism               |
| 0.000666448 | Metabolism               |
| 0.04081118  | Metabolism               |
| 3.95E-05    | Metabolism               |
| 7.25E-09    | Metabolism               |
| 0.027299559 | Metabolism               |
| 0.584425453 | Metabolism               |
| 2.82E-06    | TME                      |
| 2.02E-08    | Proliferation/Metastasis |
| 9.17E-31    | Metabolism               |
| 0.000192933 | Proliferation/Metastasis |
| 0.813166224 | TME                      |
| 0.000262009 | Proliferation/Metastasis |
| 0.005639262 | Proliferation/Metastasis |
| 4.13E-05    | TME                      |
| 5.98E-09    | TME                      |
| 5.83E-09    | Metabolism               |
| 0.227148761 | Metabolism               |
| 0.001994234 | Proliferation/Metastasis |
| 5.15E-35    | Proliferation/Metastasis |
| 9.37E-06    | Proliferation/Metastasis |
| 2.28E-34    | Metabolism               |
| 0.906551235 | Metabolism               |
| 0.02806337  | Metabolism               |
| 1.16E-08    | Proliferation/Metastasis |
| 1.17E-10    | TME                      |
| 1.97E-05    | TME                      |
| 0.137365052 | Metabolism               |
| 4.31E-06    | Proliferation/Metastasis |
| 0.012040873 | Metabolism               |
| 7.48E-05    | TME                      |
| 0.169516519 | TME                      |
| 0.182610363 | TME                      |
| 0.002735577 | TME                      |
| 2.51E-27    | Metabolism               |
| 9.42E-21    | TME                      |
| 1.91E-19    | Proliferation/Metastasis |

|             |                          |
|-------------|--------------------------|
| 3.59E-10    | TME                      |
| 0.005901523 | Proliferation/Metastasis |
| 0.068990548 | Proliferation/Metastasis |
| 0.019174985 | Metabolism               |
| 3.72E-39    | Proliferation/Metastasis |
| 5.62E-07    | TME                      |
| 2.78E-11    | Metabolism               |
| 0.10714146  | TME                      |
| 0.00800363  | TME                      |
| 0.997585161 | TME                      |
| 0.006913173 | TME                      |
| 0.016368967 | TME                      |
| 0.0006795   | TME                      |
| 7.34E-13    | Metabolism               |
| 3.72E-05    | TME                      |
| 2.79E-12    | Metabolism               |
| 8.33E-23    | Metabolism               |
| 1.09E-07    | Proliferation/Metastasis |
| 0.000330251 | Proliferation/Metastasis |
| 2.69E-20    | Metabolism               |
| 0.263948961 | Metabolism               |
| 0.166982649 | Metabolism               |
| 0.004793541 | Metabolism               |
| 0.043731581 | Proliferation/Metastasis |
| 3.62E-31    | Proliferation/Metastasis |
| 1.41E-05    | Metabolism               |
| 2.40E-07    | Metabolism               |
| 7.51E-09    | Metabolism               |
| 7.44E-05    | TME                      |
| 1.52E-19    | Metabolism               |
| 1.68E-10    | Metabolism               |
| 2.13E-13    | Metabolism               |
| 8.17E-10    | Metabolism               |
| 0.655267758 | Proliferation/Metastasis |
| 0.000386024 | Metabolism               |
| 4.42E-48    | Metabolism               |
| 2.01E-08    | Metabolism               |
| 1.66E-26    | Metabolism               |
| 9.20E-32    | Metabolism               |
| 1.19E-07    | Metabolism               |
| 1.61E-26    | Proliferation/Metastasis |
| 7.52E-36    | Metabolism               |
| 0.017870601 | Metabolism               |

|             |                          |
|-------------|--------------------------|
| 6.51E-10    | Proliferation/Metastasis |
| 0.00030888  | Metabolism               |
| 7.32E-08    | Metabolism               |
| 0.878620931 | Metabolism               |
| 2.52E-27    | Metabolism               |
| 8.90E-09    | Metabolism               |
| 9.51E-06    | Metabolism               |
| 0.298471548 | Metabolism               |
| 2.35E-19    | Metabolism               |
| 0.00074086  | TME                      |
| 2.11E-08    | TME                      |
| 3.18E-05    | TME                      |
| 3.55E-14    | TME                      |
| 3.41E-06    | TME                      |
| 0.573764705 | Metabolism               |
| 2.03E-06    | Metabolism               |
| 0.002132731 | Proliferation/Metastasis |
| 2.41E-16    | Metabolism               |
| 0.059647158 | Proliferation/Metastasis |
| 5.85E-25    | Metabolism               |
| 0.541894657 | TME                      |
| 2.16E-29    | Metabolism               |
| 0.018703506 | Metabolism               |
| 6.75E-07    | Metabolism               |
| 1.61E-26    | Metabolism               |
| 0.013170262 | TME                      |
| 0.495438059 | TME                      |
| 2.68E-06    | Proliferation/Metastasis |
| 2.16E-08    | Metabolism               |
| 0.6932119   | Proliferation/Metastasis |
| 1.64E-25    | Proliferation/Metastasis |
| 5.26E-06    | TME                      |
| 0.119348289 | TME                      |
| 1.10E-05    | TME                      |
| 0.82796231  | TME                      |
| 1.01E-18    | Metabolism               |
| 0.907576421 | Proliferation/Metastasis |
| 0.20465027  | Metabolism               |
| 0.761402117 | Metabolism               |
| 3.30E-10    | Proliferation/Metastasis |
| 0.619945255 | Proliferation/Metastasis |
| 0.551059479 | Metabolism               |
| 4.23E-20    | Metabolism               |

|             |                          |
|-------------|--------------------------|
| 3.57E-23    | Metabolism               |
| 8.06E-12    | Metabolism               |
| 0.324343779 | TME                      |
| 2.33E-05    | TME                      |
| 1.91E-05    | TME                      |
| 0.011285854 | TME                      |
| 0.001311079 | TME                      |
| 5.62E-18    | Metabolism               |
| 8.02E-11    | Metabolism               |
| 0.077714186 | Metabolism               |
| 2.27E-15    | Metabolism               |
| 0.002295772 | Metabolism               |
| 0.009169729 | TME                      |
| 0.494208833 | TME                      |
| 0.002797185 | TME                      |
| 0.619720625 | TME                      |
| 0.222191637 | TME                      |
| 0.003451556 | TME                      |
| 0.006178988 | TME                      |
| 0.01232185  | TME                      |
| 2.27E-05    | TME                      |
| 0.067227107 | Proliferation/Metastasis |
| 1.20E-05    | Proliferation/Metastasis |
| 6.28E-17    | Metabolism               |
| 0.001270923 | Metabolism               |
| 0.404708556 | TME                      |
| 0.88138977  | Metabolism               |
| 1.48E-15    | Metabolism               |
| 0.014837072 | TME                      |
| 1.99E-22    | Proliferation/Metastasis |
| 1.00E-07    | Proliferation/Metastasis |
| 1.91E-05    | TME                      |
| 4.31E-05    | Metabolism               |
| 0.003189431 | Metabolism               |
| 0.000104469 | Proliferation/Metastasis |
| 0.046042575 | Proliferation/Metastasis |
| 5.22E-06    | TME                      |
| 0.000140782 | TME                      |
| 1.04E-05    | TME                      |
| 0.087604039 | TME                      |
| 1.15E-23    | Proliferation/Metastasis |
| 0.140801628 | TME                      |
| 0.09765252  | TME                      |

|             |                          |
|-------------|--------------------------|
| 7.33E-06    | Metabolism               |
| 6.84E-17    | TME                      |
| 0.009823989 | TME                      |
| 0.206023706 | TME                      |
| 0.003164331 | TME                      |
| 0.001306195 | Metabolism               |
| 1.89E-06    | Metabolism               |
| 2.13E-11    | Metabolism               |
| 0.092260382 | TME                      |
| 0.006017613 | Metabolism               |
| 0.005704934 | TME                      |
| 0.005485257 | TME                      |
| 0.011744761 | TME                      |
| 0.191998345 | TME                      |
| 0.198915411 | TME                      |
| 0.930773515 | Metabolism               |
| 0.081847895 | Proliferation/Metastasis |
| 0.276435355 | Metabolism               |
| 2.93E-07    | Proliferation/Metastasis |
| 0.278677075 | Metabolism               |
| 2.71E-11    | Metabolism               |
| 4.04E-05    | Metabolism               |
| 0.037209473 | Metabolism               |
| 2.48E-10    | Metabolism               |
| 1.87E-06    | Metabolism               |
| 3.15E-16    | Metabolism               |
| 7.63E-05    | Metabolism               |
| 0.261096337 | Metabolism               |
| 2.10E-16    | Metabolism               |
| 1.15E-07    | Metabolism               |
| 9.84E-07    | Metabolism               |
| 8.01E-05    | Metabolism               |
| 0.664800679 | Metabolism               |
| 0.321699705 | TME                      |
| 1.86E-10    | Proliferation/Metastasis |
| 7.01E-09    | Metabolism               |
| 0.017388736 | Proliferation/Metastasis |
| 0.009630726 | TME                      |
| 0.001406361 | Proliferation/Metastasis |
| 0.009477152 | Proliferation/Metastasis |
| 2.91E-05    | TME                      |
| 0.367168081 | TME                      |
| 4.41E-48    | Metabolism               |

|             |                          |
|-------------|--------------------------|
| 4.73E-15    | Metabolism               |
| 0.061152807 | Proliferation/Metastasis |
| 2.58E-06    | Proliferation/Metastasis |
| 4.50E-17    | Proliferation/Metastasis |
| 0.380583186 | Metabolism               |
| 3.93E-11    | Metabolism               |
| 0.616017972 | Metabolism               |
| 0.096918619 | Proliferation/Metastasis |
| 0.000673627 | TME                      |
| 0.010573697 | TME                      |
| 5.88E-07    | Metabolism               |
| 1.28E-28    | Proliferation/Metastasis |
| 2.19E-25    | Metabolism               |
| 0.001630321 | TME                      |
| 0.000173102 | TME                      |
| 0.027049551 | TME                      |
| 0.000679236 | TME                      |
| 0.003630718 | Metabolism               |
| 0.018837034 | TME                      |
| 7.73E-05    | Proliferation/Metastasis |
| 0.112207451 | TME                      |
| 4.01E-11    | Proliferation/Metastasis |
| 9.17E-14    | Proliferation/Metastasis |
| 1.49E-33    | Metabolism               |
| 0.000259562 | Proliferation/Metastasis |
| 0.000291941 | TME                      |
| 0.639844095 | Metabolism               |
| 0.020899183 | TME                      |
| 8.89E-13    | TME                      |
| 0.000121898 | TME                      |
| 0.021149774 | TME                      |
| 1.34E-09    | TME                      |
| 0.000624346 | TME                      |
| 0.002830137 | Metabolism               |
| 0.064187676 | TME                      |
| 0.001851161 | Metabolism               |
| 3.72E-15    | Metabolism               |
| 1.00E-06    | Proliferation/Metastasis |
| 0.039994871 | Proliferation/Metastasis |
| 5.08E-08    | Metabolism               |
| 2.67E-14    | Metabolism               |
| 5.57E-27    | Metabolism               |
| 0.089583482 | Metabolism               |



|             |                          |
|-------------|--------------------------|
| 0.547053262 | Proliferation/Metastasis |
| 7.29E-05    | Proliferation/Metastasis |
| 8.12E-06    | Metabolism               |
| 4.01E-05    | Metabolism               |
| 0.106178509 | Metabolism               |
| 0.825306248 | TME                      |
| 0.003484608 | Metabolism               |
| 1.44E-06    | Metabolism               |
| 2.52E-28    | Metabolism               |
| 2.01E-20    | Metabolism               |
| 2.19E-16    | Proliferation/Metastasis |
| 0.000361658 | Metabolism               |
| 1.21E-14    | Metabolism               |
| 7.99E-19    | Metabolism               |
| 0.387228983 | Metabolism               |
| 1.86E-15    | Metabolism               |
| 1.20E-11    | Metabolism               |
| 1.05E-07    | Proliferation/Metastasis |
| 2.60E-06    | Metabolism               |
| 0.146906837 | Metabolism               |
| 9.29E-10    | Proliferation/Metastasis |
| 0.261404765 | Metabolism               |
| 2.75E-23    | Metabolism               |
| 1.66E-17    | Metabolism               |
| 0.000887758 | Metabolism               |
| 0.001273546 | Metabolism               |
| 0.004623629 | Metabolism               |
| 0.003564886 | Metabolism               |
| 4.35E-15    | Metabolism               |
| 4.10E-10    | TME                      |
| 0.000402911 | TME                      |
| 5.62E-05    | TME                      |
| 0.042545863 | TME                      |
| 0.014945101 | TME                      |
| 1.39E-13    | Metabolism               |
| 0.004322343 | Metabolism               |
| 1.35E-15    | Proliferation/Metastasis |
| 0.001858198 | Metabolism               |
| 0.0375395   | Proliferation/Metastasis |
| 3.50E-09    | Metabolism               |
| 1.29E-05    | TME                      |
| 1.13E-05    | Metabolism               |
| 1.13E-05    | Metabolism               |

|             |                          |
|-------------|--------------------------|
| 4.48E-07    | Metabolism               |
| 6.28E-11    | Metabolism               |
| 0.595562655 | TME                      |
| 1.54E-05    | TME                      |
| 2.94E-13    | Proliferation/Metastasis |
| 4.24E-06    | Metabolism               |
| 0.100167859 | Proliferation/Metastasis |
| 5.33E-06    | Proliferation/Metastasis |
| 0.006864896 | TME                      |
| 4.75E-69    | TME                      |
| 1.65E-36    | TME                      |
| 3.45E-34    | TME                      |
| 0.043072199 | Metabolism               |
| 8.32E-11    | Proliferation/Metastasis |
| 2.42E-10    | Metabolism               |
| 3.18E-38    | Metabolism               |
| 0.000130547 | Proliferation/Metastasis |
| 2.89E-47    | Proliferation/Metastasis |
| 6.73E-24    | Metabolism               |
| 3.95E-11    | Metabolism               |
| 0.000848893 | Metabolism               |
| 1.66E-11    | Metabolism               |
| 0.553291875 | TME                      |
| 2.38E-64    | TME                      |
| 1.60E-39    | TME                      |
| 9.13E-25    | TME                      |
| 7.50E-85    | TME                      |
| 0.00651564  | Metabolism               |
| 0.00017096  | Metabolism               |
| 0.318245257 | Metabolism               |
| 4.51E-09    | Metabolism               |
| 0.031640637 | Metabolism               |
| 1.51E-33    | TME                      |
| 8.63E-28    | TME                      |
| 7.04E-50    | TME                      |
| 1.40E-11    | TME                      |
| 1.61E-27    | TME                      |
| 8.30E-39    | TME                      |
| 5.64E-39    | TME                      |
| 8.22E-29    | TME                      |
| 1.91E-28    | TME                      |
| 0.531284123 | Proliferation/Metastasis |
| 9.74E-42    | Proliferation/Metastasis |

|             |                          |
|-------------|--------------------------|
| 0.011369048 | Metabolism               |
| 9.53E-05    | Metabolism               |
| 1.97E-27    | TME                      |
| 0.014701328 | Metabolism               |
| 2.02E-30    | Metabolism               |
| 1.43E-47    | TME                      |
| 0.001842609 | Proliferation/Metastasis |
| 0.000687062 | Proliferation/Metastasis |
| 9.43E-12    | TME                      |
| 2.68E-05    | Metabolism               |
| 2.11E-05    | Metabolism               |
| 0.684717012 | Proliferation/Metastasis |
| 2.30E-36    | Proliferation/Metastasis |
| 1.12E-28    | TME                      |
| 7.47E-58    | TME                      |
| 5.12E-13    | TME                      |
| 1.95E-30    | TME                      |
| 1.69E-05    | Proliferation/Metastasis |
| 6.47E-41    | TME                      |
| 1.12E-39    | TME                      |
| 2.12E-08    | Metabolism               |
| 2.26E-29    | TME                      |
| 2.73E-50    | TME                      |
| 8.11E-48    | TME                      |
| 0.052929474 | TME                      |
| 3.34E-05    | Metabolism               |
| 0.624542472 | Metabolism               |
| 0.348710126 | Metabolism               |
| 9.03E-41    | TME                      |
| 0.974384511 | Metabolism               |
| 1.61E-17    | TME                      |
| 0.334384237 | TME                      |
| 4.33E-26    | TME                      |
| 5.27E-25    | TME                      |
| 4.38E-06    | TME                      |
| 2.58E-21    | Metabolism               |
| 0.041970161 | Proliferation/Metastasis |
| 6.96E-41    | Metabolism               |
| 8.81E-09    | Proliferation/Metastasis |
| 7.42E-49    | Metabolism               |
| 0.000170555 | Metabolism               |
| 7.28E-08    | Metabolism               |
| 0.016111932 | Metabolism               |

|             |                          |
|-------------|--------------------------|
| 0.000128777 | Metabolism               |
| 6.39E-17    | Metabolism               |
| 1.42E-07    | Metabolism               |
| 8.05E-44    | Metabolism               |
| 2.35E-29    | Metabolism               |
| 1.34E-10    | Metabolism               |
| 1.98E-35    | Metabolism               |
| 0.018168477 | Metabolism               |
| 1.66E-12    | Metabolism               |
| 5.45E-11    | Metabolism               |
| 8.15E-48    | TME                      |
| 9.74E-10    | Proliferation/Metastasis |
| 3.12E-08    | Metabolism               |
| 1.57E-38    | Proliferation/Metastasis |
| 1.70E-27    | TME                      |
| 3.60E-56    | Proliferation/Metastasis |
| 1.33E-47    | Proliferation/Metastasis |
| 1.28E-37    | TME                      |
| 3.76E-22    | TME                      |
| 3.88E-08    | Metabolism               |
| 1.58E-13    | Metabolism               |
| 1.29E-30    | Proliferation/Metastasis |
| 0.926589715 | Proliferation/Metastasis |
| 1.14E-37    | Proliferation/Metastasis |
| 0.058346665 | Metabolism               |
| 0.02105707  | Metabolism               |
| 5.38E-31    | Metabolism               |
| 6.70E-37    | Proliferation/Metastasis |
| 5.02E-37    | TME                      |
| 2.31E-32    | TME                      |
| 1.29E-18    | Metabolism               |
| 0.000480613 | Proliferation/Metastasis |
| 0.004028133 | Metabolism               |
| 3.22E-18    | TME                      |
| 3.91E-16    | TME                      |
| 4.59E-67    | TME                      |
| 2.50E-46    | TME                      |
| 3.23E-05    | Metabolism               |
| 1.38E-33    | TME                      |
| 2.86E-08    | Proliferation/Metastasis |
| 5.47E-69    | TME                      |
| 1.42E-20    | Proliferation/Metastasis |
| 2.64E-13    | Proliferation/Metastasis |

|             |                          |
|-------------|--------------------------|
| 6.11E-06    | Metabolism               |
| 0.057638212 | Proliferation/Metastasis |
| 8.38E-31    | TME                      |
| 2.48E-10    | Metabolism               |
| 7.02E-15    | TME                      |
| 0.001265364 | TME                      |
| 6.14E-24    | TME                      |
| 6.07E-39    | TME                      |
| 6.17E-24    | TME                      |
| 6.75E-32    | TME                      |
| 2.62E-43    | Metabolism               |
| 7.11E-45    | TME                      |
| 1.82E-46    | Metabolism               |
| 0.000118303 | Metabolism               |
| 7.10E-15    | Proliferation/Metastasis |
| 3.00E-10    | Proliferation/Metastasis |
| 0.020628187 | Metabolism               |
| 2.50E-17    | Metabolism               |
| 5.53E-17    | Metabolism               |
| 0.049663397 | Metabolism               |
| 1.33E-26    | Proliferation/Metastasis |
| 0.000412731 | Proliferation/Metastasis |
| 2.25E-20    | Metabolism               |
| 0.367637439 | Metabolism               |
| 1.41E-09    | Metabolism               |
| 2.68E-26    | TME                      |
| 1.25E-27    | Metabolism               |
| 0.062408977 | Metabolism               |
| 5.24E-06    | Metabolism               |
| 1.14E-24    | Metabolism               |
| 3.11E-23    | Proliferation/Metastasis |
| 0.839267064 | Metabolism               |
| 5.49E-22    | Metabolism               |
| 3.95E-12    | Metabolism               |
| 0.754828346 | Metabolism               |
| 0.004575906 | Metabolism               |
| 0.000653871 | Metabolism               |
| 0.789474314 | Proliferation/Metastasis |
| 0.032420057 | Metabolism               |
| 1.38E-23    | Metabolism               |
| 0.003523427 | Proliferation/Metastasis |
| 3.12E-08    | Metabolism               |
| 0.03100004  | Metabolism               |

|             |                          |
|-------------|--------------------------|
| 0.020883323 | Metabolism               |
| 3.98E-47    | Metabolism               |
| 7.25E-05    | Metabolism               |
| 5.83E-05    | Metabolism               |
| 0.007023261 | Metabolism               |
| 0.006726725 | Metabolism               |
| 1.21E-19    | TME                      |
| 3.74E-51    | TME                      |
| 1.13E-39    | TME                      |
| 1.03E-59    | TME                      |
| 3.05E-49    | TME                      |
| 1.11E-15    | Metabolism               |
| 3.74E-14    | Metabolism               |
| 5.50E-08    | Proliferation/Metastasis |
| 0.002483303 | Metabolism               |
| 6.90E-35    | Proliferation/Metastasis |
| 2.75E-08    | Metabolism               |
| 0.000171278 | TME                      |
| 3.33E-17    | Metabolism               |
| 2.03E-06    | Metabolism               |
| 6.92E-26    | Metabolism               |
| 0.227389845 | Metabolism               |
| 4.85E-29    | TME                      |
| 0.002282448 | TME                      |
| 2.79E-07    | Proliferation/Metastasis |
| 0.84309949  | Metabolism               |
| 0.195530708 | Proliferation/Metastasis |
| 8.76E-12    | Proliferation/Metastasis |
| 0.115009225 | TME                      |
| 7.76E-06    | TME                      |
| 0.125711091 | TME                      |
| 9.48E-25    | TME                      |
| 4.57E-22    | Metabolism               |
| 0.037503069 | Proliferation/Metastasis |
| 9.82E-10    | Metabolism               |
| 5.15E-08    | Metabolism               |
| 3.18E-06    | Proliferation/Metastasis |
| 8.56E-15    | Proliferation/Metastasis |
| 1.76E-05    | Metabolism               |
| 7.60E-13    | Metabolism               |
| 2.08E-19    | Metabolism               |
| 1.05E-06    | Metabolism               |
| 0.001696278 | TME                      |

|             |                          |
|-------------|--------------------------|
| 0.52307107  | TME                      |
| 0.021514708 | TME                      |
| 7.38E-06    | TME                      |
| 3.07E-07    | TME                      |
| 6.82E-16    | Metabolism               |
| 8.92E-07    | Metabolism               |
| 3.28E-09    | Metabolism               |
| 1.24E-31    | Metabolism               |
| 0.026889668 | Metabolism               |
| 3.72E-13    | TME                      |
| 1.96E-07    | TME                      |
| 0.242398429 | TME                      |
| 5.71E-15    | TME                      |
| 0.009708646 | TME                      |
| 0.057345378 | TME                      |
| 0.005350941 | TME                      |
| 3.98E-05    | TME                      |
| 2.00E-07    | TME                      |
| 3.45E-32    | Proliferation/Metastasis |
| 0.005875711 | Proliferation/Metastasis |
| 1.04E-05    | Metabolism               |
| 1.51E-11    | Metabolism               |
| 8.50E-08    | TME                      |
| 0.080622177 | Metabolism               |
| 6.56E-38    | Metabolism               |
| 0.055439423 | TME                      |
| 3.52E-15    | Proliferation/Metastasis |
| 2.74E-31    | Proliferation/Metastasis |
| 1.19E-16    | TME                      |
| 7.82E-11    | Metabolism               |
| 0.139097886 | Metabolism               |
| 5.69E-35    | Proliferation/Metastasis |
| 3.32E-11    | Proliferation/Metastasis |
| 0.078099524 | TME                      |
| 0.581563685 | TME                      |
| 0.782301702 | TME                      |
| 3.07E-06    | TME                      |
| 2.61E-11    | Proliferation/Metastasis |
| 1.84E-15    | TME                      |
| 0.304550977 | TME                      |
| 4.19E-09    | Metabolism               |
| 0.293397015 | TME                      |
| 0.000735601 | TME                      |

|             |                          |
|-------------|--------------------------|
| 0.000664127 | TME                      |
| 1.89E-08    | TME                      |
| 0.000122348 | Metabolism               |
| 9.59E-14    | Metabolism               |
| 1.75E-07    | Metabolism               |
| 8.36E-10    | TME                      |
| 0.023164878 | Metabolism               |
| 0.256142171 | TME                      |
| 0.67041441  | TME                      |
| 0.02061946  | TME                      |
| 7.05E-10    | TME                      |
| 4.46E-11    | TME                      |
| 0.144889619 | Metabolism               |
| 1.87E-34    | Proliferation/Metastasis |
| 6.99E-06    | Metabolism               |
| 0.504946266 | Proliferation/Metastasis |
| 0.944057769 | Metabolism               |
| 1.06E-16    | Metabolism               |
| 2.85E-12    | Metabolism               |
| 8.58E-11    | Metabolism               |
| 5.86E-05    | Metabolism               |
| 6.63E-14    | Metabolism               |
| 0.555173205 | Metabolism               |
| 0.923446156 | Metabolism               |
| 1.18E-06    | Metabolism               |
| 0.000709487 | Metabolism               |
| 0.027173834 | Metabolism               |
| 1.64E-29    | Metabolism               |
| 4.52E-12    | Metabolism               |
| 0.007638651 | Metabolism               |
| 0.011298665 | TME                      |
| 0.574155778 | Proliferation/Metastasis |
| 9.27E-09    | Metabolism               |
| 0.007660117 | Proliferation/Metastasis |
| 9.67E-12    | TME                      |
| 8.80E-06    | Proliferation/Metastasis |
| 7.45E-06    | Proliferation/Metastasis |
| 0.001235309 | TME                      |
| 0.097430691 | TME                      |
| 4.74E-19    | Metabolism               |
| 0.000290006 | Metabolism               |
| 3.88E-18    | Proliferation/Metastasis |
| 3.43E-21    | Proliferation/Metastasis |



|             |                          |
|-------------|--------------------------|
| 0.048840767 | Proliferation/Metastasis |
| 7.35E-13    | Metabolism               |
| 0.479313904 | Metabolism               |
| 0.925746428 | Metabolism               |
| 1.06E-05    | Proliferation/Metastasis |
| 0.327660442 | TME                      |
| 0.214367135 | TME                      |
| 0.758401556 | Metabolism               |
| 5.94E-08    | Proliferation/Metastasis |
| 0.08259338  | Metabolism               |
| 0.140826889 | TME                      |
| 0.004192557 | TME                      |
| 4.50E-13    | TME                      |
| 2.79E-05    | TME                      |
| 4.70E-13    | Metabolism               |
| 0.369178035 | TME                      |
| 1.18E-08    | Proliferation/Metastasis |
| 0.027122817 | TME                      |
| 1.42E-06    | Proliferation/Metastasis |
| 2.90E-06    | Proliferation/Metastasis |
| 0.607127805 | Metabolism               |
| 2.07E-11    | Proliferation/Metastasis |
| 0.096368281 | TME                      |
| 3.88E-35    | Metabolism               |
| 0.004356254 | TME                      |
| 0.031351914 | TME                      |
| 1.34E-06    | TME                      |
| 0.000105225 | TME                      |
| 2.33E-15    | TME                      |
| 0.003674442 | TME                      |
| 0.950969263 | Metabolism               |
| 0.022711628 | TME                      |
| 0.780855048 | Metabolism               |
| 3.94E-12    | Metabolism               |
| 0.001454738 | Proliferation/Metastasis |
| 0.117471962 | Proliferation/Metastasis |
| 6.98E-14    | Metabolism               |
| 1.26E-15    | Metabolism               |
| 0.00109305  | Metabolism               |
| 6.82E-05    | Metabolism               |
| 5.42E-06    | Proliferation/Metastasis |
| 1.09E-47    | Proliferation/Metastasis |
| 0.010465237 | Metabolism               |

|             |                          |
|-------------|--------------------------|
| 0.001478679 | Metabolism               |
| 0.009512302 | Metabolism               |
| 8.08E-16    | TME                      |
| 0.003215611 | Metabolism               |
| 3.97E-10    | Metabolism               |
| 9.55E-06    | Metabolism               |
| 0.506807525 | Metabolism               |
| 2.62E-06    | Proliferation/Metastasis |
| 0.007234613 | Metabolism               |
| 7.03E-15    | Metabolism               |
| 1.55E-10    | Metabolism               |
| 1.50E-08    | Metabolism               |
| 1.57E-21    | Metabolism               |
| 7.29E-13    | Metabolism               |
| 1.81E-12    | Proliferation/Metastasis |
| 3.07E-18    | Metabolism               |
| 0.004100366 | Metabolism               |
| 1.57E-05    | Proliferation/Metastasis |
| 0.066727363 | Metabolism               |
| 0.000399594 | Metabolism               |
| 0.011632125 | Metabolism               |
| 0.033401302 | Metabolism               |
| 5.72E-08    | Metabolism               |
| 6.51E-10    | Metabolism               |
| 0.220276901 | Metabolism               |
| 9.74E-26    | Metabolism               |
| 0.097660334 | TME                      |
| 0.133134173 | TME                      |
| 0.068112116 | TME                      |
| 0.489538532 | TME                      |
| 0.035074918 | TME                      |
| 0.078323867 | Metabolism               |
| 0.778222416 | Metabolism               |
| 0.12190857  | Proliferation/Metastasis |
| 1.47E-07    | Metabolism               |
| 0.002695774 | Proliferation/Metastasis |
| 0.001334568 | Metabolism               |
| 0.035023314 | TME                      |
| 3.00E-08    | Metabolism               |
| 1.23E-11    | Metabolism               |
| 0.005361114 | Metabolism               |
| 2.38E-17    | Metabolism               |
| 2.76E-10    | TME                      |

|             |                          |
|-------------|--------------------------|
| 0.100558863 | TME                      |
| 1.26E-10    | Proliferation/Metastasis |
| 7.08E-05    | Metabolism               |
| 0.349375048 | Proliferation/Metastasis |
| 7.67E-08    | Proliferation/Metastasis |
| 0.890782273 | TME                      |
| 0.64521517  | TME                      |
| 0.062031076 | TME                      |
| 0.839854192 | TME                      |
| 0.003477196 | Metabolism               |
| 0.113621445 | Proliferation/Metastasis |
| 1.29E-10    | Metabolism               |
| 1.37E-06    | Metabolism               |
| 0.052500317 | Proliferation/Metastasis |
| 0.000577721 | Proliferation/Metastasis |
| 4.45E-10    | Metabolism               |
| 0.005904024 | Metabolism               |
| 5.68E-05    | Metabolism               |
| 0.003883773 | Metabolism               |
| 0.154386506 | TME                      |
| 5.16E-07    | TME                      |
| 0.075624776 | TME                      |
| 0.745640717 | TME                      |
| 0.000699483 | TME                      |
| 1.41E-05    | Metabolism               |
| 4.67E-05    | Metabolism               |
| 0.033617168 | Metabolism               |
| 0.000265753 | Metabolism               |
| 1.83E-13    | Metabolism               |
| 0.668632783 | TME                      |
| 0.103291328 | TME                      |
| 0.111162241 | TME                      |
| 0.934515467 | TME                      |
| 0.001217379 | TME                      |
| 0.26368994  | TME                      |
| 0.299445641 | TME                      |
| 0.53557458  | TME                      |
| 0.704369055 | TME                      |
| 1.31E-07    | Proliferation/Metastasis |
| 7.88E-13    | Proliferation/Metastasis |
| 0.026587122 | Metabolism               |
| 1.14E-05    | Metabolism               |
| 0.533610142 | TME                      |

|             |                          |
|-------------|--------------------------|
| 0.000509255 | Metabolism               |
| 0.000333221 | Metabolism               |
| 0.018584356 | TME                      |
| 0.001229563 | Proliferation/Metastasis |
| 0.002252573 | Proliferation/Metastasis |
| 0.292429292 | TME                      |
| 0.000724068 | Metabolism               |
| 1.49E-05    | Metabolism               |
| 0.000118943 | Proliferation/Metastasis |
| 0.016092564 | Proliferation/Metastasis |
| 0.520816001 | TME                      |
| 0.279676187 | TME                      |
| 0.581053482 | TME                      |
| 0.097753267 | TME                      |
| 0.722492359 | Proliferation/Metastasis |
| 0.064988026 | TME                      |
| 0.000644498 | TME                      |
| 0.278211194 | Metabolism               |
| 0.056521539 | TME                      |
| 0.059902611 | TME                      |
| 0.850701138 | TME                      |
| 0.000151803 | TME                      |
| 0.005157028 | Metabolism               |
| 0.000230021 | Metabolism               |
| 0.000196974 | Metabolism               |
| 0.028405573 | TME                      |
| 1.32E-11    | Metabolism               |
| 0.56409655  | TME                      |
| 0.065454773 | TME                      |
| 0.862850179 | TME                      |
| 0.516514924 | TME                      |
| 0.058679892 | TME                      |
| 2.07E-05    | Metabolism               |
| 1.06E-05    | Proliferation/Metastasis |
| 6.47E-08    | Metabolism               |
| 0.062823585 | Proliferation/Metastasis |
| 2.41E-05    | Metabolism               |
| 5.31E-16    | Metabolism               |
| 0.000705965 | Metabolism               |
| 1.89E-05    | Metabolism               |
| 7.31E-06    | Metabolism               |
| 0.00316715  | Metabolism               |
| 1.41E-07    | Metabolism               |

|             |                          |
|-------------|--------------------------|
| 0.866839753 | Metabolism               |
| 0.211167371 | Metabolism               |
| 0.08972048  | Metabolism               |
| 6.03E-05    | Metabolism               |
| 0.0004858   | Metabolism               |
| 0.048024585 | Metabolism               |
| 0.009148061 | Metabolism               |
| 0.004158124 | TME                      |
| 0.004337157 | Proliferation/Metastasis |
| 2.04E-06    | Metabolism               |
| 3.20E-09    | Proliferation/Metastasis |
| 0.676463011 | TME                      |
| 0.000676135 | Proliferation/Metastasis |
| 6.46E-06    | Proliferation/Metastasis |
| 0.961916849 | TME                      |
| 3.87E-08    | TME                      |
| 0.618836132 | Metabolism               |
| 0.030866222 | Metabolism               |
| 0.056672144 | Proliferation/Metastasis |
| 1.09E-12    | Proliferation/Metastasis |
| 5.52E-07    | Proliferation/Metastasis |
| 2.53E-07    | Metabolism               |
| 0.000811443 | Metabolism               |
| 0.181700345 | Metabolism               |
| 0.006573038 | Proliferation/Metastasis |
| 0.000367861 | TME                      |
| 8.80E-06    | TME                      |
| 0.765276661 | Metabolism               |
| 0.299578001 | Proliferation/Metastasis |
| 0.03118026  | Metabolism               |
| 0.000161573 | TME                      |
| 0.514662689 | TME                      |
| 0.527152219 | TME                      |
| 4.41E-05    | TME                      |
| 1.38E-05    | Metabolism               |
| 0.590061057 | TME                      |
| 7.48E-05    | Proliferation/Metastasis |
| 0.000142799 | TME                      |
| 0.09973472  | Proliferation/Metastasis |
| 0.337767279 | Proliferation/Metastasis |
| 0.627595876 | Metabolism               |
| 8.44E-09    | Proliferation/Metastasis |
| 0.011949046 | TME                      |

|             |                          |
|-------------|--------------------------|
| 0.034818113 | Metabolism               |
| 0.589912469 | TME                      |
| 0.012018316 | TME                      |
| 1.08E-06    | TME                      |
| 0.399537966 | TME                      |
| 0.024375911 | TME                      |
| 0.012940367 | TME                      |
| 4.04E-13    | Metabolism               |
| 2.13E-11    | TME                      |
| 1.86E-12    | Metabolism               |
| 0.932512909 | Metabolism               |
| 0.110989868 | Proliferation/Metastasis |
| 0.004574437 | Proliferation/Metastasis |
| 0.025022416 | Metabolism               |
| 0.106626907 | Metabolism               |
| 0.799093944 | Metabolism               |
| 0.009398106 | Metabolism               |
| 2.73E-07    | Proliferation/Metastasis |
| 0.340677417 | Proliferation/Metastasis |
| 2.08E-08    | Metabolism               |
| 1.21E-05    | Metabolism               |
| 0.007700898 | Metabolism               |
| 0.314524778 | TME                      |
| 0.003942068 | Metabolism               |
| 1.76E-07    | Metabolism               |
| 0.296636441 | Metabolism               |
| 0.802579558 | Metabolism               |
| 0.08211072  | Proliferation/Metastasis |
| 0.038529432 | Metabolism               |
| 0.002120215 | Metabolism               |
| 6.48E-05    | Metabolism               |
| 0.270566517 | Metabolism               |
| 0.004379851 | Metabolism               |
| 2.66E-07    | Metabolism               |
| 0.010226293 | Proliferation/Metastasis |
| 3.38E-06    | Metabolism               |
| 0.000251661 | Metabolism               |
| 2.53E-05    | Proliferation/Metastasis |
| 0.216423482 | Metabolism               |
| 0.000125386 | Metabolism               |
| 0.831042148 | Metabolism               |
| 2.27E-14    | Metabolism               |
| 0.440300554 | Metabolism               |

|             |                          |
|-------------|--------------------------|
| 4.24E-05    | Metabolism               |
| 0.079543166 | Metabolism               |
| 4.11E-05    | Metabolism               |
| 0.454278363 | TME                      |
| 0.255937715 | TME                      |
| 0.429659308 | TME                      |
| 0.259207647 | TME                      |
| 0.166506732 | TME                      |
| 0.384890189 | Metabolism               |
| 0.155726669 | Metabolism               |
| 0.051559184 | Proliferation/Metastasis |
| 8.80E-20    | Metabolism               |
| 6.43E-06    | Proliferation/Metastasis |
| 3.30E-07    | Metabolism               |
| 0.914688435 | TME                      |
| 0.004017485 | Metabolism               |
| 5.68E-07    | Metabolism               |
| 1.07E-24    | Metabolism               |
| 0.000439611 | Metabolism               |
| 8.05E-06    | TME                      |
| 0.007058588 | TME                      |
| 0.323959515 | Proliferation/Metastasis |
| 0.004930813 | Metabolism               |
| 0.201693059 | Proliferation/Metastasis |
| 5.27E-21    | Proliferation/Metastasis |
| 0.004499419 | TME                      |
| 0.94176015  | TME                      |
| 0.110511953 | TME                      |
| 0.533807947 | TME                      |
| 0.0003875   | Metabolism               |
| 0.083849251 | Proliferation/Metastasis |
| 0.040658409 | Metabolism               |
| 0.534367533 | Metabolism               |
| 0.281941037 | Proliferation/Metastasis |
| 0.000815635 | Proliferation/Metastasis |
| 0.814644972 | Metabolism               |
| 0.039856177 | Metabolism               |
| 0.075682941 | Metabolism               |
| 0.002514757 | Metabolism               |
| 0.628684825 | TME                      |
| 0.056574206 | TME                      |
| 0.037052305 | TME                      |
| 0.721809921 | TME                      |

|             |                          |
|-------------|--------------------------|
| 0.887132684 | TME                      |
| 0.021887145 | Metabolism               |
| 0.240528893 | Metabolism               |
| 0.787583349 | Metabolism               |
| 0.144809603 | Metabolism               |
| 0.000103341 | Metabolism               |
| 4.01E-07    | TME                      |
| 1.82E-06    | TME                      |
| 0.526821526 | TME                      |
| 0.874889454 | TME                      |
| 0.467757218 | TME                      |
| 0.945240604 | TME                      |
| 0.865922786 | TME                      |
| 0.099770137 | TME                      |
| 0.568324174 | TME                      |
| 0.186923729 | Proliferation/Metastasis |
| 0.000347704 | Proliferation/Metastasis |
| 0.008235695 | Metabolism               |
| 0.000472194 | Metabolism               |
| 0.186583684 | TME                      |
| 0.836886144 | Metabolism               |
| 0.001782078 | Metabolism               |
| 0.006203721 | TME                      |
| 2.59E-11    | Proliferation/Metastasis |
| 9.73E-06    | Proliferation/Metastasis |
| 0.014774787 | TME                      |
| 0.105230503 | Metabolism               |
| 0.092465101 | Metabolism               |
| 0.043873491 | Proliferation/Metastasis |
| 3.88E-09    | Proliferation/Metastasis |
| 0.002372794 | TME                      |
| 0.002143457 | TME                      |
| 0.043220326 | TME                      |
| 0.007712113 | TME                      |
| 0.000159778 | Proliferation/Metastasis |
| 3.31E-06    | TME                      |
| 0.067793521 | TME                      |
| 0.596367637 | Metabolism               |
| 0.004889555 | TME                      |
| 0.01483966  | TME                      |
| 0.029355445 | TME                      |
| 0.035285634 | TME                      |
| 0.479362563 | Metabolism               |



|             |                          |
|-------------|--------------------------|
| 0.926829052 | Metabolism               |
| 0.003432363 | Metabolism               |
| 5.17E-08    | TME                      |
| 0.47973536  | Metabolism               |
| 0.088003757 | TME                      |
| 0.641875528 | TME                      |
| 0.404283908 | TME                      |
| 0.000135451 | TME                      |
| 0.45059455  | TME                      |
| 0.442318362 | Metabolism               |
| 0.432960051 | Proliferation/Metastasis |
| 0.558005364 | Metabolism               |
| 0.000115889 | Proliferation/Metastasis |
| 0.632148666 | Metabolism               |
| 0.361065791 | Metabolism               |
| 0.000252251 | Metabolism               |
| 0.870820703 | Metabolism               |
| 0.50505621  | Metabolism               |
| 0.75143221  | Metabolism               |
| 0.200337492 | Metabolism               |
| 0.562430283 | Metabolism               |
| 4.50E-05    | Metabolism               |
| 0.475487741 | Metabolism               |
| 0.913765796 | Metabolism               |
| 0.298418751 | Metabolism               |
| 0.252017299 | Metabolism               |
| 0.159437927 | Metabolism               |
| 0.001873242 | TME                      |
| 5.58E-13    | Proliferation/Metastasis |
| 0.043682781 | Metabolism               |
| 6.55E-05    | Proliferation/Metastasis |
| 0.305468235 | TME                      |
| 0.001637235 | Proliferation/Metastasis |
| 1.34E-05    | Proliferation/Metastasis |
| 0.060428867 | TME                      |
| 0.67553098  | TME                      |
| 0.000463672 | Metabolism               |
| 7.99E-16    | Metabolism               |
| 0.048804927 | Proliferation/Metastasis |
| 0.223996058 | Proliferation/Metastasis |
| 3.11E-07    | Proliferation/Metastasis |
| 0.574971582 | Metabolism               |
| 0.12144246  | Metabolism               |

|             |                          |
|-------------|--------------------------|
| 0.740258714 | Metabolism               |
| 0.105440079 | Proliferation/Metastasis |
| 0.001372112 | TME                      |
| 0.011089282 | TME                      |
| 1.45E-08    | Metabolism               |
| 8.98E-10    | Proliferation/Metastasis |
| 6.75E-17    | Metabolism               |
| 0.010888898 | TME                      |
| 0.163400079 | TME                      |
| 0.02248342  | TME                      |
| 2.70E-09    | TME                      |
| 0.225157804 | Metabolism               |
| 0.070564339 | TME                      |
| 3.42E-06    | Proliferation/Metastasis |
| 0.034896817 | TME                      |
| 0.123923383 | Proliferation/Metastasis |
| 0.553683155 | Proliferation/Metastasis |
| 5.83E-08    | Metabolism               |
| 0.000163246 | Proliferation/Metastasis |
| 0.001319002 | TME                      |
| 0.362641561 | Metabolism               |
| 0.959970346 | TME                      |
| 7.22E-09    | TME                      |
| 3.57E-06    | TME                      |
| 0.874702919 | TME                      |
| 0.200506793 | TME                      |
| 0.091523735 | TME                      |
| 0.677780511 | Metabolism               |
| 0.010590786 | TME                      |
| 0.087235711 | Metabolism               |
| 0.656540468 | Metabolism               |
| 7.19E-06    | Proliferation/Metastasis |
| 0.049376121 | Proliferation/Metastasis |
| 0.054694    | Metabolism               |
| 0.050575322 | Metabolism               |
| 4.42E-06    | Metabolism               |
| 9.26E-06    | Metabolism               |
| 0.605056684 | Proliferation/Metastasis |
| 0.008159504 | Proliferation/Metastasis |
| 0.107175653 | Metabolism               |
| 0.000901706 | Metabolism               |
| 0.353715417 | Metabolism               |
| 3.73E-06    | TME                      |

|             |                          |
|-------------|--------------------------|
| 0.047734133 | Metabolism               |
| 0.695172908 | Metabolism               |
| 0.00289461  | Metabolism               |
| 8.67E-07    | Metabolism               |
| 0.314579825 | Proliferation/Metastasis |
| 0.639027788 | Metabolism               |
| 0.16276517  | Metabolism               |
| 0.108902511 | Metabolism               |
| 0.00077191  | Metabolism               |
| 1.74E-06    | Metabolism               |
| 0.60087308  | Metabolism               |
| 0.075616367 | Proliferation/Metastasis |
| 0.372456763 | Metabolism               |
| 0.000311528 | Metabolism               |
| 0.000411507 | Proliferation/Metastasis |
| 5.07E-05    | Metabolism               |
| 1.98E-07    | Metabolism               |
| 1.01E-05    | Metabolism               |
| 0.907905772 | Metabolism               |
| 9.94E-07    | Metabolism               |
| 0.044451048 | Metabolism               |
| 0.000219262 | Metabolism               |
| 0.003791751 | Metabolism               |
| 0.254397789 | TME                      |
| 0.859971563 | TME                      |
| 0.069020081 | TME                      |
| 0.467086275 | TME                      |
| 0.491566119 | TME                      |
| 0.711840395 | Metabolism               |
| 0.000103612 | Metabolism               |
| 3.04E-10    | Proliferation/Metastasis |
| 0.09667591  | Metabolism               |
| 5.51E-07    | Proliferation/Metastasis |
| 0.467834061 | Metabolism               |
| 0.228140662 | TME                      |
| 0.566239321 | Metabolism               |
| 0.274116986 | Metabolism               |
| 0.741825006 | Metabolism               |
| 0.512636967 | Metabolism               |
| 0.000235178 | TME                      |
| 0.00051135  | TME                      |
| 0.646564203 | Proliferation/Metastasis |
| 0.008108527 | Metabolism               |

|             |                          |
|-------------|--------------------------|
| 0.051779735 | Proliferation/Metastasis |
| 0.164602026 | Proliferation/Metastasis |
| 0.181463625 | TME                      |
| 0.418665804 | TME                      |
| 0.44034538  | TME                      |
| 0.262030363 | TME                      |
| 0.039086461 | Metabolism               |
| 3.99E-16    | Proliferation/Metastasis |
| 8.71E-06    | Metabolism               |
| 0.033630055 | Metabolism               |
| 0.001737014 | Proliferation/Metastasis |
| 0.005803417 | Proliferation/Metastasis |
| 0.017248381 | Metabolism               |
| 0.000783262 | Metabolism               |
| 1.20E-06    | Metabolism               |
| 0.440793407 | Metabolism               |
| 0.043241992 | TME                      |
| 1.39E-06    | TME                      |
| 0.860037435 | TME                      |
| 0.30414005  | TME                      |
| 0.000201095 | TME                      |
| 1.83E-09    | Metabolism               |
| 0.000827415 | Metabolism               |
| 1.24E-07    | Metabolism               |
| 1.93E-07    | Metabolism               |
| 1.76E-07    | Metabolism               |
| 0.859845615 | TME                      |
| 0.659398173 | TME                      |
| 0.158184125 | TME                      |
| 0.056839626 | TME                      |
| 0.004902457 | TME                      |
| 0.312096997 | TME                      |
| 0.517209324 | TME                      |
| 0.757214805 | TME                      |
| 0.497266283 | TME                      |
| 1.85E-30    | Proliferation/Metastasis |
| 3.89E-11    | Proliferation/Metastasis |
| 3.23E-05    | Metabolism               |
| 0.101308497 | Metabolism               |
| 0.328187186 | TME                      |
| 0.059041733 | Metabolism               |
| 0.000819361 | Metabolism               |
| 0.094714383 | TME                      |

|             |                          |
|-------------|--------------------------|
| 8.04E-19    | Proliferation/Metastasis |
| 6.07E-28    | Proliferation/Metastasis |
| 0.243620926 | TME                      |
| 3.40E-05    | Metabolism               |
| 0.341600689 | Metabolism               |
| 1.00E-31    | Proliferation/Metastasis |
| 2.57E-06    | Proliferation/Metastasis |
| 0.002930012 | TME                      |
| 0.685764738 | TME                      |
| 0.040010954 | TME                      |
| 0.09452479  | TME                      |
| 1.73E-10    | Proliferation/Metastasis |
| 0.004273414 | TME                      |
| 0.377426039 | TME                      |
| 0.440129195 | Metabolism               |
| 0.371514163 | TME                      |
| 0.921677721 | TME                      |
| 0.631815165 | TME                      |
| 8.43E-14    | TME                      |
| 0.417587714 | Metabolism               |
| 7.84E-10    | Metabolism               |
| 0.654390577 | Metabolism               |
| 2.77E-06    | TME                      |
| 0.001510042 | Metabolism               |
| 0.222837119 | TME                      |
| 0.211098345 | TME                      |
| 0.086996655 | TME                      |
| 0.009286421 | TME                      |
| 0.000141401 | TME                      |
| 0.002002719 | Metabolism               |
| 1.59E-28    | Proliferation/Metastasis |
| 0.837277465 | Metabolism               |
| 1.78E-08    | Proliferation/Metastasis |
| 0.502772645 | Metabolism               |
| 0.000522929 | Metabolism               |
| 0.473734979 | Metabolism               |
| 2.26E-05    | Metabolism               |
| 0.035227171 | Metabolism               |
| 0.016665304 | Metabolism               |
| 0.001350781 | Metabolism               |
| 0.022319405 | Metabolism               |
| 0.003376524 | Metabolism               |
| 0.294786736 | Metabolism               |

|             |                          |
|-------------|--------------------------|
| 0.098777824 | Metabolism               |
| 0.038649273 | Metabolism               |
| 0.037493245 | Metabolism               |
| 0.001896019 | Metabolism               |
| 0.76520344  | TME                      |
| 0.000268532 | Proliferation/Metastasis |
| 6.00E-13    | Metabolism               |
| 0.076756097 | Proliferation/Metastasis |
| 0.723819587 | TME                      |
| 0.159770958 | Proliferation/Metastasis |
| 0.00904511  | Proliferation/Metastasis |
| 0.755202124 | TME                      |
| 0.075678035 | TME                      |
| 1.35E-05    | Metabolism               |
| 8.37E-09    | Metabolism               |
| 3.02E-17    | Proliferation/Metastasis |
| 1.60E-19    | Proliferation/Metastasis |
| 1.48E-06    | Proliferation/Metastasis |
| 6.09E-05    | Metabolism               |
| 0.884949407 | Metabolism               |
| 2.61E-07    | Metabolism               |
| 0.01978771  | Proliferation/Metastasis |
| 0.076152037 | TME                      |
| 0.001140146 | TME                      |
| 0.008563127 | Metabolism               |
| 1.67E-08    | Proliferation/Metastasis |
| 3.28E-07    | Metabolism               |
| 0.000191007 | TME                      |
| 0.157319561 | TME                      |
| 0.606365104 | TME                      |
| 0.001378337 | TME                      |
| 5.39E-05    | Metabolism               |
| 0.007549295 | TME                      |
| 0.001131214 | Proliferation/Metastasis |
| 0.654880417 | TME                      |
| 0.001116145 | Proliferation/Metastasis |
| 8.54E-22    | Proliferation/Metastasis |
| 4.68E-05    | Metabolism               |
| 3.58E-45    | Proliferation/Metastasis |
| 0.023417733 | TME                      |
| 0.257493596 | Metabolism               |
| 0.000101561 | TME                      |
| 0.000112323 | TME                      |

|             |                          |
|-------------|--------------------------|
| 0.002149444 | TME                      |
| 0.125822202 | TME                      |
| 1.31E-09    | TME                      |
| 0.010734304 | TME                      |
| 0.210394214 | Metabolism               |
| 0.154525555 | TME                      |
| 4.76E-05    | Metabolism               |
| 7.03E-06    | Metabolism               |
| 0.540448948 | Proliferation/Metastasis |
| 0.026270399 | Proliferation/Metastasis |
| 0.955172851 | Metabolism               |
| 3.31E-05    | Metabolism               |
| 0.671776498 | Metabolism               |
| 0.399849316 | Metabolism               |
| 0.545363078 | Proliferation/Metastasis |
| 0.001933349 | Proliferation/Metastasis |
| 0.924411806 | Metabolism               |
| 0.594665567 | Metabolism               |
| 8.65E-08    | Metabolism               |
| 1.50E-05    | TME                      |
| 6.11E-05    | Metabolism               |
| 0.002998747 | Metabolism               |
| 1.26E-06    | Metabolism               |
| 2.63E-08    | Metabolism               |
| 0.020320496 | Proliferation/Metastasis |
| 0.574031497 | Metabolism               |
| 7.00E-09    | Metabolism               |
| 1.30E-09    | Metabolism               |
| 4.61E-17    | Metabolism               |
| 1.03E-32    | Metabolism               |
| 0.008579851 | Metabolism               |
| 0.000411182 | Proliferation/Metastasis |
| 0.006970736 | Metabolism               |
| 0.865912399 | Metabolism               |
| 7.23E-14    | Proliferation/Metastasis |
| 0.783434751 | Metabolism               |
| 0.001582549 | Metabolism               |
| 0.100840761 | Metabolism               |
| 6.59E-07    | Metabolism               |
| 0.006571472 | Metabolism               |
| 0.004735506 | Metabolism               |
| 0.006020663 | Metabolism               |
| 2.61E-07    | Metabolism               |

|             |                          |
|-------------|--------------------------|
| 0.00851403  | TME                      |
| 0.189911063 | TME                      |
| 0.859301343 | TME                      |
| 0.293209556 | TME                      |
| 0.337501558 | TME                      |
| 0.001897258 | Metabolism               |
| 0.099942227 | Metabolism               |
| 0.000574764 | Proliferation/Metastasis |
| 0.000952331 | Metabolism               |
| 0.063262786 | Proliferation/Metastasis |
| 6.26E-09    | Metabolism               |
| 0.023710813 | TME                      |
| 1.18E-09    | Metabolism               |
| 0.016890974 | Metabolism               |
| 0.759913725 | Metabolism               |
| 2.44E-10    | Metabolism               |
| 3.80E-07    | TME                      |
| 9.51E-07    | TME                      |
| 2.06E-05    | Proliferation/Metastasis |
| 0.875184068 | Metabolism               |
| 0.078181935 | Proliferation/Metastasis |
| 0.032200869 | Proliferation/Metastasis |
| 0.008436424 | TME                      |
| 0.796855413 | TME                      |
| 0.013778398 | TME                      |
| 0.706630946 | TME                      |
| 0.000768332 | Metabolism               |
| 0.000756608 | Proliferation/Metastasis |
| 0.00138911  | Metabolism               |
| 0.000558293 | Metabolism               |
| 0.000164016 | Proliferation/Metastasis |
| 3.44E-13    | Proliferation/Metastasis |
| 8.57E-06    | Metabolism               |
| 0.039437126 | Metabolism               |
| 0.018745268 | Metabolism               |
| 3.61E-06    | Metabolism               |
| 0.05256688  | TME                      |
| 6.33E-10    | TME                      |
| 0.006954304 | TME                      |
| 0.120314255 | TME                      |
| 0.494504095 | TME                      |
| 1.37E-08    | Metabolism               |
| 0.007106424 | Metabolism               |



|             |                          |
|-------------|--------------------------|
| 0.030088769 | Metabolism               |
| 0.023086609 | Metabolism               |
| 6.00E-11    | Metabolism               |
| 9.16E-05    | TME                      |
| 0.108631881 | TME                      |
| 0.000130042 | TME                      |
| 0.100267543 | TME                      |
| 0.025344747 | TME                      |
| 0.055016436 | TME                      |
| 0.057859701 | TME                      |
| 0.741163807 | TME                      |
| 0.764450125 | TME                      |
| 1.35E-09    | Proliferation/Metastasis |
| 0.68001155  | Proliferation/Metastasis |
| 6.58E-05    | Metabolism               |
| 0.015697789 | Metabolism               |
| 0.246705231 | TME                      |
| 0.214768113 | Metabolism               |
| 0.011416943 | Metabolism               |
| 2.31E-06    | TME                      |
| 6.13E-16    | Proliferation/Metastasis |
| 2.29E-15    | Proliferation/Metastasis |
| 0.010513135 | TME                      |
| 8.31E-06    | Metabolism               |
| 0.244892181 | Metabolism               |
| 2.59E-12    | Proliferation/Metastasis |
| 2.97E-13    | Proliferation/Metastasis |
| 2.06E-05    | TME                      |
| 2.37E-06    | TME                      |
| 0.000327945 | TME                      |
| 0.001653596 | TME                      |
| 4.04E-06    | Proliferation/Metastasis |
| 3.63E-07    | TME                      |
| 0.000614862 | TME                      |
| 0.066656938 | Metabolism               |
| 4.40E-05    | TME                      |
| 0.000173079 | TME                      |
| 0.996001415 | TME                      |
| 0.120196858 | TME                      |
| 0.001771484 | Metabolism               |
| 0.000549881 | Metabolism               |
| 0.504081847 | Metabolism               |
| 9.61E-15    | TME                      |

|             |                          |
|-------------|--------------------------|
| 1.93E-06    | Metabolism               |
| 0.027733545 | TME                      |
| 0.109865676 | TME                      |
| 0.001683849 | TME                      |
| 0.118938778 | TME                      |
| 0.085992367 | TME                      |
| 0.116257645 | Metabolism               |
| 1.27E-08    | Proliferation/Metastasis |
| 5.37E-07    | Metabolism               |
| 2.17E-09    | Proliferation/Metastasis |
| 0.014714286 | Metabolism               |
| 4.55E-06    | Metabolism               |
| 0.218830174 | Metabolism               |
| 0.016387242 | Metabolism               |
| 3.43E-05    | Metabolism               |
| 0.002001679 | Metabolism               |
| 0.074366302 | Metabolism               |
| 0.048362841 | Metabolism               |
| 8.75E-08    | Metabolism               |
| 1.22E-05    | Metabolism               |
| 0.084673583 | Metabolism               |
| 0.075850286 | Metabolism               |
| 4.57E-07    | Metabolism               |
| 0.114650507 | Metabolism               |
| 0.000319651 | TME                      |
| 2.73E-11    | Proliferation/Metastasis |
| 5.50E-09    | Metabolism               |
| 1.03E-09    | Proliferation/Metastasis |
| 0.112495799 | TME                      |
| 8.92E-12    | Proliferation/Metastasis |
| 5.41E-16    | Proliferation/Metastasis |
| 0.01933979  | TME                      |
| 0.000685712 | TME                      |
| 1.35E-06    | Metabolism               |
| 5.50E-17    | Metabolism               |
| 0.70009674  | Proliferation/Metastasis |
| 3.33E-05    | Proliferation/Metastasis |
| 5.29E-18    | Proliferation/Metastasis |
| 4.14E-05    | Metabolism               |
| 0.374861232 | Metabolism               |
| 0.038500962 | Metabolism               |
| 9.44E-06    | Proliferation/Metastasis |
| 3.07E-06    | TME                      |

|             |                          |
|-------------|--------------------------|
| 1.10E-06    | TME                      |
| 0.001156398 | Metabolism               |
| 2.43E-16    | Proliferation/Metastasis |
| 2.40E-09    | Metabolism               |
| 8.06E-05    | TME                      |
| 0.341221702 | TME                      |
| 0.000104047 | TME                      |
| 1.68E-12    | TME                      |
| 6.59E-06    | Metabolism               |
| 0.057093352 | TME                      |
| 0.12233444  | Proliferation/Metastasis |
| 1.98E-05    | TME                      |
| 2.20E-06    | Proliferation/Metastasis |
| 0.093074624 | Proliferation/Metastasis |
| 2.12E-08    | Metabolism               |
| 7.34E-13    | Proliferation/Metastasis |
| 4.05E-06    | TME                      |
| 0.006783652 | Metabolism               |
| 0.002825334 | TME                      |
| 1.62E-07    | TME                      |
| 0.000594566 | TME                      |
| 0.003557348 | TME                      |
| 0.099606813 | TME                      |
| 0.000564041 | TME                      |
| 0.001807548 | Metabolism               |
| 2.30E-07    | TME                      |
| 5.99E-10    | Metabolism               |
| 0.000118599 | Metabolism               |
| 1.51E-07    | Proliferation/Metastasis |
| 0.000121021 | Proliferation/Metastasis |
| 0.001117432 | Metabolism               |
| 0.007337151 | Metabolism               |
| 0.000688846 | Metabolism               |
| 0.516381371 | Metabolism               |
| 2.17E-06    | Proliferation/Metastasis |
| 0.007107195 | Proliferation/Metastasis |
| 0.639722406 | Metabolism               |
| 1.33E-05    | Metabolism               |
| 0.624881487 | Metabolism               |
| 2.02E-09    | TME                      |
| 8.79E-09    | Metabolism               |
| 0.055448316 | Metabolism               |
| 1.34E-05    | Metabolism               |

|             |                          |
|-------------|--------------------------|
| 9.70E-05    | Metabolism               |
| 0.028312304 | Proliferation/Metastasis |
| 3.24E-07    | Metabolism               |
| 7.38E-05    | Metabolism               |
| 0.000208462 | Metabolism               |
| 0.316708668 | Metabolism               |
| 1.74E-10    | Metabolism               |
| 0.000280774 | Metabolism               |
| 0.038154159 | Proliferation/Metastasis |
| 4.54E-05    | Metabolism               |
| 0.56784383  | Metabolism               |
| 3.38E-15    | Proliferation/Metastasis |
| 0.00065863  | Metabolism               |
| 0.001311278 | Metabolism               |
| 0.002854389 | Metabolism               |
| 6.85E-09    | Metabolism               |
| 0.002862875 | Metabolism               |
| 4.89E-06    | Metabolism               |
| 0.000327277 | Metabolism               |
| 0.627372764 | Metabolism               |
| 4.55E-05    | TME                      |
| 0.017331569 | TME                      |
| 0.000151058 | TME                      |
| 0.00059109  | TME                      |
| 0.040658668 | TME                      |
| 0.564507702 | Metabolism               |
| 0.023511238 | Metabolism               |
| 3.44E-05    | Proliferation/Metastasis |
| 2.82E-06    | Metabolism               |
| 1.62E-12    | Proliferation/Metastasis |
| 9.00E-05    | Metabolism               |
| 0.472038078 | TME                      |
| 9.94E-06    | Metabolism               |
| 0.021316784 | Metabolism               |
| 0.001084515 | Metabolism               |
| 0.000255316 | Metabolism               |
| 5.13E-13    | TME                      |
| 3.10E-06    | TME                      |
| 3.58E-06    | Proliferation/Metastasis |
| 0.232011682 | Metabolism               |
| 0.049773864 | Proliferation/Metastasis |
| 0.900443962 | Proliferation/Metastasis |
| 0.015296296 | TME                      |

|             |                          |
|-------------|--------------------------|
| 6.79E-07    | TME                      |
| 0.000570918 | TME                      |
| 0.00017672  | TME                      |
| 0.000320327 | Metabolism               |
| 5.72E-16    | Proliferation/Metastasis |
| 0.193874923 | Metabolism               |
| 2.20E-09    | Metabolism               |
| 0.063917586 | Proliferation/Metastasis |
| 2.48E-08    | Proliferation/Metastasis |
| 8.50E-11    | Metabolism               |
| 0.773571198 | Metabolism               |
| 2.09E-09    | Metabolism               |
| 8.20E-09    | Metabolism               |
| 0.005256002 | TME                      |
| 2.53E-12    | TME                      |
| 2.44E-07    | TME                      |
| 0.010568814 | TME                      |
| 2.15E-34    | TME                      |
| 2.04E-07    | Metabolism               |
| 0.00035563  | Metabolism               |
| 2.60E-08    | Metabolism               |
| 2.72E-08    | Metabolism               |
| 1.55E-05    | Metabolism               |
| 0.01924359  | TME                      |
| 0.010640962 | TME                      |
| 3.45E-09    | TME                      |
| 0.066687253 | TME                      |
| 0.040516341 | TME                      |
| 6.26E-05    | TME                      |
| 2.12E-05    | TME                      |
| 0.002937655 | TME                      |
| 0.033473049 | TME                      |
| 0.507515428 | Proliferation/Metastasis |
| 3.30E-12    | Proliferation/Metastasis |
| 0.028854747 | Metabolism               |
| 0.335674667 | Metabolism               |
| 9.85E-08    | TME                      |
| 9.83E-07    | Metabolism               |
| 1.09E-06    | Metabolism               |
| 4.01E-05    | TME                      |
| 0.129884182 | Proliferation/Metastasis |
| 0.022624568 | Proliferation/Metastasis |
| 0.000164066 | TME                      |

|             |                          |
|-------------|--------------------------|
| 5.22E-06    | Metabolism               |
| 0.913762385 | Metabolism               |
| 0.123267576 | Proliferation/Metastasis |
| 0.004808939 | Proliferation/Metastasis |
| 0.732166716 | TME                      |
| 7.44E-09    | TME                      |
| 0.030533224 | TME                      |
| 0.000272406 | TME                      |
| 0.014565077 | Proliferation/Metastasis |
| 0.003288435 | TME                      |
| 5.99E-15    | TME                      |
| 2.46E-06    | Metabolism               |
| 2.66E-09    | TME                      |
| 2.66E-10    | TME                      |
| 3.93E-06    | TME                      |
| 0.006315917 | TME                      |
| 0.002737357 | Metabolism               |
| 6.63E-13    | Metabolism               |
| 0.909524634 | Metabolism               |
| 0.028618248 | TME                      |
| 0.011621387 | Metabolism               |
| 0.004226716 | TME                      |
| 0.274620907 | TME                      |
| 0.959059215 | TME                      |
| 1.04E-06    | TME                      |
| 7.36E-05    | TME                      |
| 3.10E-16    | Metabolism               |
| 0.42840928  | Proliferation/Metastasis |
| 2.97E-15    | Metabolism               |
| 0.000903768 | Proliferation/Metastasis |
| 0.000140592 | Metabolism               |
| 0.570389689 | Metabolism               |
| 2.09E-07    | Metabolism               |
| 1.50E-05    | Metabolism               |
| 0.043829729 | Metabolism               |
| 6.76E-19    | Metabolism               |
| 0.077994644 | Metabolism               |
| 1.69E-08    | Metabolism               |
| 0.093028253 | Metabolism               |
| 8.72E-07    | Metabolism               |
| 5.85E-10    | Metabolism               |
| 1.97E-11    | Metabolism               |
| 0.000236271 | Metabolism               |

|             |                          |
|-------------|--------------------------|
| 4.77E-09    | Metabolism               |
| 2.20E-09    | TME                      |
| 0.863423912 | Proliferation/Metastasis |
| 3.28E-09    | Metabolism               |
| 1.55E-19    | Proliferation/Metastasis |
| 0.000119131 | TME                      |
| 7.42E-08    | Proliferation/Metastasis |
| 0.000897944 | Proliferation/Metastasis |
| 9.21E-12    | TME                      |
| 1.17E-12    | TME                      |
| 9.52E-06    | Metabolism               |
| 0.000922704 | Metabolism               |
| 4.61E-06    | Proliferation/Metastasis |
| 0.000903832 | Proliferation/Metastasis |
| 0.000250322 | Proliferation/Metastasis |
| 0.535812777 | Metabolism               |
| 0.000772925 | Metabolism               |
| 8.17E-25    | Metabolism               |
| 2.87E-06    | Proliferation/Metastasis |
| 1.51E-06    | TME                      |
| 0.000123076 | TME                      |
| 0.003349021 | Metabolism               |
| 0.449027221 | Proliferation/Metastasis |
| 1.06E-06    | Metabolism               |
| 0.067306805 | TME                      |
| 4.96E-06    | TME                      |
| 2.53E-10    | TME                      |
| 8.01E-05    | TME                      |
| 0.011387255 | Metabolism               |
| 0.008126003 | TME                      |
| 0.00067245  | Proliferation/Metastasis |
| 3.41E-18    | TME                      |
| 0.006405416 | Proliferation/Metastasis |
| 4.80E-06    | Proliferation/Metastasis |
| 0.803574912 | Metabolism               |
| 0.000361889 | Proliferation/Metastasis |
| 0.00015749  | TME                      |
| 2.23E-07    | Metabolism               |
| 2.65E-09    | TME                      |
| 0.073493083 | TME                      |
| 0.217905529 | TME                      |
| 0.000129683 | TME                      |
| 8.18E-07    | TME                      |

|             |                          |
|-------------|--------------------------|
| 0.000264911 | TME                      |
| 7.74E-11    | Metabolism               |
| 7.43E-17    | TME                      |
| 0.064188953 | Metabolism               |
| 1.43E-15    | Metabolism               |
| 0.000522095 | Proliferation/Metastasis |
| 2.90E-05    | Proliferation/Metastasis |
| 0.131664825 | Metabolism               |
| 0.035246121 | Metabolism               |
| 0.168740185 | Metabolism               |
| 0.000168531 | Metabolism               |
| 1.77E-13    | Proliferation/Metastasis |
| 0.23167027  | Proliferation/Metastasis |
| 0.133250514 | Metabolism               |
| 0.001194173 | Metabolism               |
| 2.49E-08    | Metabolism               |
| 0.523049142 | TME                      |
| 0.02491147  | Metabolism               |
| 0.124133782 | Metabolism               |
| 3.72E-09    | Metabolism               |
| 1.12E-15    | Metabolism               |
| 0.007865528 | Proliferation/Metastasis |
| 0.012217302 | Metabolism               |
| 1.22E-11    | Metabolism               |
| 4.89E-11    | Metabolism               |
| 0.007134016 | Metabolism               |
| 0.09735204  | Metabolism               |
| 0.00100221  | Metabolism               |
| 0.959062477 | Proliferation/Metastasis |
| 1.83E-06    | Metabolism               |
| 0.326238817 | Metabolism               |
| 4.49E-07    | Proliferation/Metastasis |
| 7.32E-12    | Metabolism               |
| 3.60E-07    | Metabolism               |
| 0.011539424 | Metabolism               |
| 0.000540271 | Metabolism               |
| 1.55E-05    | Metabolism               |
| 4.31E-06    | Metabolism               |
| 3.05E-12    | Metabolism               |
| 0.000692156 | Metabolism               |
| 0.070725119 | TME                      |
| 0.003169515 | TME                      |
| 0.009109625 | TME                      |



|             |                          |
|-------------|--------------------------|
| 3.01E-05    | TME                      |
| 1.53E-06    | TME                      |
| 0.050609849 | Metabolism               |
| 0.020055916 | Metabolism               |
| 0.004975183 | Proliferation/Metastasis |
| 0.062108212 | Metabolism               |
| 4.52E-06    | Proliferation/Metastasis |
| 1.72E-09    | Metabolism               |
| 0.000152859 | TME                      |
| 1.12E-07    | Metabolism               |
| 0.790205455 | Metabolism               |
| 7.81E-23    | Metabolism               |
| 1.03E-11    | Metabolism               |
| 0.761781733 | TME                      |
| 0.058757667 | TME                      |
| 0.004002607 | Proliferation/Metastasis |
| 0.002922034 | Metabolism               |
| 7.81E-05    | Proliferation/Metastasis |
| 7.25E-08    | Proliferation/Metastasis |
| 0.665900205 | TME                      |
| 0.60980072  | TME                      |
| 0.02246839  | TME                      |
| 0.106041768 | TME                      |
| 7.59E-12    | Metabolism               |
| 0.280383706 | Proliferation/Metastasis |
| 4.48E-15    | Metabolism               |
| 0.030171684 | Metabolism               |
| 0.246390992 | Proliferation/Metastasis |
| 0.050538483 | Proliferation/Metastasis |
| 2.32E-10    | Metabolism               |
| 5.90E-12    | Metabolism               |
| 3.31E-20    | Metabolism               |
| 2.00E-10    | Metabolism               |
| 0.026138164 | TME                      |
| 0.031093156 | TME                      |
| 0.009998327 | TME                      |
| 0.08617436  | TME                      |
| 0.243517286 | TME                      |
| 5.38E-15    | Metabolism               |
| 4.73E-09    | Metabolism               |
| 4.44E-09    | Metabolism               |
| 9.76E-13    | Metabolism               |
| 1.93E-12    | Metabolism               |

|             |                          |
|-------------|--------------------------|
| 0.540854386 | TME                      |
| 0.110406224 | TME                      |
| 0.209611482 | TME                      |
| 0.08207284  | TME                      |
| 1.46E-08    | TME                      |
| 0.008292851 | TME                      |
| 0.018332968 | TME                      |
| 0.03144412  | TME                      |
| 0.101235844 | TME                      |
| 5.04E-08    | Proliferation/Metastasis |
| 5.95E-06    | Proliferation/Metastasis |
| 7.08E-12    | Metabolism               |
| 1.76E-13    | Metabolism               |
| 0.776553992 | TME                      |
| 4.01E-09    | Metabolism               |
| 2.26E-07    | Metabolism               |
| 0.014798401 | TME                      |
| 0.037019836 | Proliferation/Metastasis |
| 2.87E-06    | Proliferation/Metastasis |
| 0.750606324 | TME                      |
| 1.27E-14    | Metabolism               |
| 2.42E-12    | Metabolism               |
| 6.96E-07    | Proliferation/Metastasis |
| 0.122173886 | Proliferation/Metastasis |
| 0.027912364 | TME                      |
| 0.89757929  | TME                      |
| 0.017110021 | TME                      |
| 0.000675872 | TME                      |
| 0.818262698 | Proliferation/Metastasis |
| 0.082621586 | TME                      |
| 0.140872156 | TME                      |
| 0.925926689 | Metabolism               |
| 0.082028009 | TME                      |
| 0.185690241 | TME                      |
| 0.101409973 | TME                      |
| 5.09E-11    | TME                      |
| 0.002358668 | Metabolism               |
| 3.75E-13    | Metabolism               |
| 8.45E-05    | Metabolism               |
| 0.009769394 | TME                      |
| 1.01E-17    | Metabolism               |
| 0.26886649  | TME                      |
| 0.517772753 | TME                      |

|             |                          |
|-------------|--------------------------|
| 0.001135652 | TME                      |
| 0.396626017 | TME                      |
| 2.31E-07    | TME                      |
| 0.211073937 | Metabolism               |
| 3.92E-10    | Proliferation/Metastasis |
| 0.002417849 | Metabolism               |
| 0.454220008 | Proliferation/Metastasis |
| 4.76E-10    | Metabolism               |
| 2.99E-21    | Metabolism               |
| 0.000227213 | Metabolism               |
| 1.17E-18    | Metabolism               |
| 8.20E-08    | Metabolism               |
| 0.47632304  | Metabolism               |
| 7.51E-06    | Metabolism               |
| 0.611856013 | Metabolism               |
| 0.434525749 | Metabolism               |
| 0.004558927 | Metabolism               |
| 0.035461555 | Metabolism               |
| 0.036117813 | Metabolism               |
| 0.006316169 | Metabolism               |
| 8.05E-14    | Metabolism               |
| 0.170534063 | TME                      |
| 0.000488898 | Proliferation/Metastasis |
| 6.36E-15    | Metabolism               |
| 0.005949121 | Proliferation/Metastasis |
| 0.092222602 | TME                      |
| 0.000993058 | Proliferation/Metastasis |
| 0.000385205 | Proliferation/Metastasis |
| 0.690456274 | TME                      |
| 0.000223238 | TME                      |
| 0.31785351  | Metabolism               |
| 0.002225767 | Metabolism               |
| 0.542203176 | Proliferation/Metastasis |
| 4.22E-08    | Proliferation/Metastasis |
| 2.61E-05    | Proliferation/Metastasis |
| 4.93E-17    | Metabolism               |
| 0.507964319 | Metabolism               |
| 6.50E-06    | Metabolism               |
| 0.074244363 | Proliferation/Metastasis |
| 0.009193929 | TME                      |
| 4.21E-08    | TME                      |
| 0.000456854 | Metabolism               |
| 0.843570872 | Proliferation/Metastasis |

|             |                          |
|-------------|--------------------------|
| 0.006607741 | Metabolism               |
| 2.42E-05    | TME                      |
| 0.060993786 | TME                      |
| 0.650783974 | TME                      |
| 0.001843949 | TME                      |
| 3.39E-15    | Metabolism               |
| 0.01051631  | TME                      |
| 7.85E-08    | Proliferation/Metastasis |
| 0.06293688  | TME                      |
| 0.451352721 | Proliferation/Metastasis |
| 0.080865333 | Proliferation/Metastasis |
| 0.538599324 | Metabolism               |
| 7.11E-05    | Proliferation/Metastasis |
| 0.000560478 | TME                      |
| 0.05790463  | Metabolism               |
| 0.135880717 | TME                      |
| 0.083084779 | TME                      |
| 0.909932616 | TME                      |
| 0.01149647  | TME                      |
| 0.216448659 | TME                      |
| 0.000279278 | TME                      |
| 0.035011013 | Metabolism               |
| 0.003891448 | TME                      |
| 5.80E-16    | Metabolism               |
| 5.54E-08    | Metabolism               |
| 0.155924451 | Proliferation/Metastasis |
| 0.562304179 | Proliferation/Metastasis |
| 5.25E-08    | Metabolism               |
| 0.197823672 | Metabolism               |
| 0.005559724 | Metabolism               |
| 1.26E-05    | Metabolism               |
| 1.04E-05    | Proliferation/Metastasis |
| 0.00033285  | Proliferation/Metastasis |
| 5.97E-07    | Metabolism               |
| 2.40E-12    | Metabolism               |
| 0.12943025  | Metabolism               |
| 0.013856875 | TME                      |
| 2.66E-12    | Metabolism               |
| 3.09E-11    | Metabolism               |
| 2.57E-05    | Metabolism               |
| 0.001422583 | Metabolism               |
| 0.849213466 | Proliferation/Metastasis |
| 2.68E-10    | Metabolism               |

|             |                          |
|-------------|--------------------------|
| 2.97E-14    | Metabolism               |
| 4.09E-19    | Metabolism               |
| 0.57756217  | Metabolism               |
| 0.013848905 | Metabolism               |
| 3.28E-16    | Metabolism               |
| 1.54E-08    | Proliferation/Metastasis |
| 2.49E-14    | Metabolism               |
| 0.000189819 | Metabolism               |
| 1.01E-08    | Proliferation/Metastasis |
| 9.41E-05    | Metabolism               |
| 0.006106535 | Metabolism               |
| 0.042374359 | Metabolism               |
| 8.58E-09    | Metabolism               |
| 0.032237487 | Metabolism               |
| 1.29E-14    | Metabolism               |
| 5.13E-07    | Metabolism               |
| 7.20E-12    | Metabolism               |
| 0.000456278 | TME                      |
| 0.000266956 | TME                      |
| 0.057630168 | TME                      |
| 0.021303534 | TME                      |
| 0.015306594 | TME                      |
| 0.60061804  | Metabolism               |
| 0.56114886  | Metabolism               |
| 0.304541777 | Proliferation/Metastasis |
| 6.25E-06    | Metabolism               |
| 0.004240468 | Proliferation/Metastasis |
| 1.28E-22    | Metabolism               |
| 0.008015151 | TME                      |
| 3.80E-14    | Metabolism               |
| 6.43E-09    | Metabolism               |
| 3.05E-15    | Metabolism               |
| 2.62E-19    | Metabolism               |
| 2.06E-08    | TME                      |
| 0.01109196  | TME                      |
| 0.103853334 | Proliferation/Metastasis |
| 0.000898571 | Metabolism               |
| 0.068181563 | Proliferation/Metastasis |
| 8.61E-14    | Proliferation/Metastasis |
| 0.001062492 | TME                      |
| 0.001751913 | TME                      |
| 1.03E-06    | TME                      |
| 7.29E-10    | TME                      |

|             |                          |
|-------------|--------------------------|
| 0.20883295  | Metabolism               |
| 6.87E-08    | Proliferation/Metastasis |
| 0.027872078 | Metabolism               |
| 2.01E-11    | Metabolism               |
| 0.034298031 | Proliferation/Metastasis |
| 1.21E-13    | Proliferation/Metastasis |
| 0.008628882 | Metabolism               |
| 0.536609085 | Metabolism               |
| 0.373715384 | Metabolism               |
| 0.288203324 | Metabolism               |
| 0.330697402 | TME                      |
| 3.40E-06    | TME                      |
| 0.032358902 | TME                      |
| 0.455032081 | TME                      |
| 1.07E-35    | TME                      |
| 0.032409793 | Metabolism               |
| 0.446888782 | Metabolism               |
| 0.346313291 | Metabolism               |
| 5.60E-13    | Metabolism               |
| 0.393577515 | Metabolism               |
| 4.50E-06    | TME                      |
| 0.548412252 | TME                      |
| 5.74E-10    | TME                      |
| 0.01899669  | TME                      |
| 7.66E-11    | TME                      |
| 1.11E-05    | TME                      |
| 3.82E-07    | TME                      |
| 1.39E-08    | TME                      |
| 3.06E-06    | TME                      |
| 0.002873836 | Proliferation/Metastasis |
| 0.288219451 | Proliferation/Metastasis |
| 0.867091145 | Metabolism               |
| 0.101216183 | Metabolism               |
| 0.043773155 | TME                      |
| 0.885245997 | Metabolism               |
| 0.811658654 | Metabolism               |
| 2.13E-07    | TME                      |
| 0.01194323  | Proliferation/Metastasis |
| 0.012553366 | Proliferation/Metastasis |
| 0.323044801 | TME                      |
| 0.473119285 | Metabolism               |
| 5.37E-06    | Metabolism               |
| 0.115027322 | Proliferation/Metastasis |

|             |                          |
|-------------|--------------------------|
| 3.87E-10    | Proliferation/Metastasis |
| 0.002520604 | TME                      |
| 9.64E-10    | TME                      |
| 0.000135776 | TME                      |
| 1.34E-05    | TME                      |
| 0.955062073 | Proliferation/Metastasis |
| 0.000222579 | TME                      |
| 1.62E-09    | TME                      |
| 0.446549998 | Metabolism               |
| 1.26E-12    | TME                      |
| 7.77E-15    | TME                      |
| 2.37E-07    | TME                      |
| 0.011174354 | TME                      |
| 0.443155658 | Metabolism               |
| 1.87E-06    | Metabolism               |
| 0.035589402 | Metabolism               |
| 3.90E-10    | TME                      |
| 0.959998758 | Metabolism               |
| 0.003779896 | TME                      |
| 0.236329537 | TME                      |
| 1.12E-06    | TME                      |
| 2.52E-09    | TME                      |
| 1.93E-07    | TME                      |
| 4.61E-08    | Metabolism               |
| 0.298866502 | Proliferation/Metastasis |
| 7.64E-24    | Metabolism               |
| 0.000295981 | Proliferation/Metastasis |
| 0.012430335 | Metabolism               |
| 0.946232943 | Metabolism               |
| 0.102510222 | Metabolism               |
| 0.569459809 | Metabolism               |
| 6.95E-05    | Metabolism               |
| 1.27E-12    | Metabolism               |
| 0.090716785 | Metabolism               |
| 0.000606289 | Metabolism               |
| 0.000860436 | Metabolism               |
| 0.019617351 | Metabolism               |
| 1.81E-08    | Metabolism               |
| 5.56E-06    | Metabolism               |
| 1.26E-05    | Metabolism               |
| 0.04475203  | Metabolism               |
| 6.88E-09    | TME                      |
| 0.782955266 | Proliferation/Metastasis |

|             |                          |
|-------------|--------------------------|
| 0.019607486 | Metabolism               |
| 4.18E-22    | Proliferation/Metastasis |
| 3.71E-05    | TME                      |
| 4.90E-16    | Proliferation/Metastasis |
| 8.79E-17    | Proliferation/Metastasis |
| 1.71E-12    | TME                      |
| 2.93E-14    | TME                      |
| 0.009493331 | Metabolism               |
| 0.1214379   | Metabolism               |
| 8.48E-06    | Proliferation/Metastasis |
| 0.305539631 | Proliferation/Metastasis |
| 2.67E-12    | Proliferation/Metastasis |
| 0.047853189 | Metabolism               |
| 0.716046602 | Metabolism               |
| 8.50E-14    | Metabolism               |
| 0.001227859 | Proliferation/Metastasis |
| 2.31E-10    | TME                      |
| 5.41E-09    | TME                      |
| 1.22E-05    | Metabolism               |
| 0.000229668 | Proliferation/Metastasis |
| 0.000191865 | Metabolism               |
| 0.183247475 | TME                      |
| 0.063541037 | TME                      |
| 3.51E-14    | TME                      |
| 6.19E-07    | TME                      |
| 0.789157556 | Metabolism               |
| 1.77E-14    | TME                      |
| 0.151196391 | Proliferation/Metastasis |
| 8.90E-20    | TME                      |
| 0.047997895 | Proliferation/Metastasis |
| 7.06E-05    | Proliferation/Metastasis |
| 0.041950772 | Metabolism               |
| 0.013981584 | Proliferation/Metastasis |
| 9.18E-08    | TME                      |
| 0.118151651 | Metabolism               |
| 0.746123706 | TME                      |
| 0.002420075 | TME                      |
| 0.571711255 | TME                      |
| 3.00E-08    | TME                      |
| 4.25E-07    | TME                      |
| 0.000109082 | TME                      |
| 2.87E-09    | Metabolism               |
| 4.19E-21    | TME                      |



|             |                          |
|-------------|--------------------------|
| 0.007192321 | Metabolism               |
| 0.11862179  | Metabolism               |
| 1.99E-12    | Proliferation/Metastasis |
| 0.004993592 | Proliferation/Metastasis |
| 0.692639456 | Metabolism               |
| 0.146344073 | Metabolism               |
| 0.028763006 | Metabolism               |
| 0.208524039 | Metabolism               |
| 8.29E-11    | Proliferation/Metastasis |
| 2.69E-09    | Proliferation/Metastasis |
| 0.183153555 | Metabolism               |
| 0.365610379 | Metabolism               |
| 1.58E-11    | Metabolism               |
| 5.55E-08    | TME                      |
| 0.00891113  | Metabolism               |
| 0.228276068 | Metabolism               |
| 0.222003733 | Metabolism               |
| 0.416850467 | Metabolism               |
| 1.08E-09    | Proliferation/Metastasis |
| 0.601434302 | Metabolism               |
| 0.955416696 | Metabolism               |
| 6.80E-09    | Metabolism               |
| 0.109355129 | Metabolism               |
| 0.000371227 | Metabolism               |
| 0.000300366 | Metabolism               |
| 0.160991366 | Proliferation/Metastasis |
| 0.613753283 | Metabolism               |
| 0.051868379 | Metabolism               |
| 8.83E-07    | Proliferation/Metastasis |
| 4.19E-07    | Metabolism               |
| 0.09446178  | Metabolism               |
| 0.011695805 | Metabolism               |
| 9.44E-08    | Metabolism               |
| 3.58E-05    | Metabolism               |
| 0.221459004 | Metabolism               |
| 0.585859316 | Metabolism               |
| 6.67E-13    | Metabolism               |
| 1.12E-08    | TME                      |
| 1.57E-14    | TME                      |
| 1.78E-07    | TME                      |
| 1.03E-09    | TME                      |
| 1.85E-05    | TME                      |
| 2.07E-08    | Metabolism               |

|             |                          |
|-------------|--------------------------|
| 0.004348974 | Metabolism               |
| 0.603588935 | Proliferation/Metastasis |
| 0.441176007 | Metabolism               |
| 3.42E-20    | Proliferation/Metastasis |
| 0.013996013 | Metabolism               |
| 1.39E-09    | TME                      |
| 0.020562245 | Metabolism               |
| 0.28553741  | Metabolism               |
| 0.007081107 | Metabolism               |
| 1.15E-11    | Metabolism               |
| 0.020671264 | TME                      |
| 0.019414452 | TME                      |
| 0.000124986 | Proliferation/Metastasis |
| 0.020010437 | Metabolism               |
| 0.009620442 | Proliferation/Metastasis |
| 0.215107929 | Proliferation/Metastasis |
| 0.003585175 | TME                      |
| 0.908863236 | TME                      |
| 0.536003776 | TME                      |
| 0.51521094  | TME                      |
| 0.037840839 | Metabolism               |
| 0.217598244 | Proliferation/Metastasis |
| 0.987106721 | Metabolism               |
| 0.181422136 | Metabolism               |
| 0.913535452 | Proliferation/Metastasis |
| 1.02E-07    | Proliferation/Metastasis |
| 0.542201778 | Metabolism               |
| 0.621338346 | Metabolism               |
| 0.027313178 | Metabolism               |
| 0.54215762  | Metabolism               |
| 0.86516229  | TME                      |
| 0.039745632 | TME                      |
| 0.526763109 | TME                      |
| 0.853694212 | TME                      |
| 0.050936198 | TME                      |
| 0.02506952  | Metabolism               |
| 0.634731049 | Metabolism               |
| 0.472352569 | Metabolism               |
| 0.041551793 | Metabolism               |
| 0.000606096 | Metabolism               |
| 0.000215308 | TME                      |
| 0.028082584 | TME                      |
| 0.827550963 | TME                      |

|             |                          |
|-------------|--------------------------|
| 0.485660696 | TME                      |
| 0.241005165 | TME                      |
| 0.733473266 | TME                      |
| 0.476050262 | TME                      |
| 0.842384592 | TME                      |
| 0.633620616 | TME                      |
| 0.794078738 | Proliferation/Metastasis |
| 5.11E-08    | Proliferation/Metastasis |
| 0.874292458 | Metabolism               |
| 0.782067126 | Metabolism               |
| 0.077352756 | TME                      |
| 0.606618366 | Metabolism               |
| 0.000734057 | Metabolism               |
| 0.355197088 | TME                      |
| 6.15E-08    | Proliferation/Metastasis |
| 0.000738115 | Proliferation/Metastasis |
| 0.138545843 | TME                      |
| 0.586148094 | Metabolism               |
| 0.040317886 | Metabolism               |
| 0.940256112 | Proliferation/Metastasis |
| 4.29E-09    | Proliferation/Metastasis |
| 0.130138879 | TME                      |
| 0.315133916 | TME                      |
| 0.181410178 | TME                      |
| 0.098179935 | TME                      |
| 0.000158932 | Proliferation/Metastasis |
| 0.011342472 | TME                      |
| 0.448069084 | TME                      |
| 0.012024882 | Metabolism               |
| 0.496220033 | TME                      |
| 0.436557476 | TME                      |
| 0.86386229  | TME                      |
| 0.034391996 | TME                      |
| 0.417463193 | Metabolism               |
| 0.182057155 | Metabolism               |
| 0.019724917 | Metabolism               |
| 0.001531247 | TME                      |
| 2.98E-05    | Metabolism               |
| 0.47092641  | TME                      |
| 0.222262888 | TME                      |
| 0.654360826 | TME                      |
| 0.226194831 | TME                      |
| 0.913683435 | TME                      |

|             |                          |
|-------------|--------------------------|
| 0.574104446 | Metabolism               |
| 0.06798566  | Proliferation/Metastasis |
| 0.509231451 | Metabolism               |
| 0.001339606 | Proliferation/Metastasis |
| 0.003541734 | Metabolism               |
| 0.308602551 | Metabolism               |
| 0.813906129 | Metabolism               |
| 0.000280859 | Metabolism               |
| 0.550805572 | Metabolism               |
| 0.482875086 | Metabolism               |
| 0.618422777 | Metabolism               |
| 0.281960944 | Metabolism               |
| 0.889700619 | Metabolism               |
| 0.458784247 | Metabolism               |
| 0.989528007 | Metabolism               |
| 0.803740719 | Metabolism               |
| 0.159974036 | Metabolism               |
| 0.006780902 | Metabolism               |
| 0.476318991 | TME                      |
| 4.96E-05    | Proliferation/Metastasis |
| 0.682979124 | Metabolism               |
| 0.001023268 | Proliferation/Metastasis |
| 0.454216858 | TME                      |
| 9.07E-05    | Proliferation/Metastasis |
| 0.012221483 | Proliferation/Metastasis |
| 0.867248137 | TME                      |
| 0.359350212 | TME                      |
| 6.03E-08    | Metabolism               |
| 1.71E-13    | Metabolism               |
| 0.097831599 | Proliferation/Metastasis |
| 0.314644255 | Proliferation/Metastasis |
| 1.90E-05    | Proliferation/Metastasis |
| 0.293055508 | Metabolism               |
| 0.002306367 | Metabolism               |
| 0.918254529 | Metabolism               |
| 0.257726377 | Proliferation/Metastasis |
| 0.202268901 | TME                      |
| 0.100847352 | TME                      |
| 2.33E-05    | Metabolism               |
| 1.02E-05    | Proliferation/Metastasis |
| 1.30E-13    | Metabolism               |
| 0.095899932 | TME                      |
| 0.767926789 | TME                      |

|             |                          |
|-------------|--------------------------|
| 0.210742092 | TME                      |
| 0.001681056 | TME                      |
| 0.565907187 | Metabolism               |
| 0.000358928 | TME                      |
| 6.84E-09    | Proliferation/Metastasis |
| 0.496797515 | TME                      |
| 0.004708732 | Proliferation/Metastasis |
| 0.170301411 | Proliferation/Metastasis |
| 9.05E-07    | Metabolism               |
| 0.598764851 | Proliferation/Metastasis |
| 0.135794916 | TME                      |
| 0.123109802 | Metabolism               |
| 0.100521504 | TME                      |
| 0.003442704 | TME                      |
| 0.048431889 | TME                      |
| 0.424931349 | TME                      |
| 0.004118543 | TME                      |
| 0.019768403 | TME                      |
| 0.001282581 | Metabolism               |
| 0.060742468 | TME                      |
| 0.058815394 | Metabolism               |
| 0.577763957 | Metabolism               |
| 0.00155893  | Proliferation/Metastasis |
| 0.017833802 | Proliferation/Metastasis |
| 0.713463257 | Metabolism               |
| 0.147543392 | Metabolism               |
| 4.04E-05    | Metabolism               |
| 1.77E-10    | Metabolism               |
| 0.398281536 | Proliferation/Metastasis |
| 0.006770395 | Proliferation/Metastasis |
| 0.204719255 | Metabolism               |
| 0.537786392 | Metabolism               |
| 0.407558984 | Metabolism               |
| 0.054051304 | TME                      |
| 0.06886896  | Metabolism               |
| 0.861668424 | Metabolism               |
| 0.332210865 | Metabolism               |
| 1.84E-05    | Metabolism               |
| 0.035320452 | Proliferation/Metastasis |
| 0.038918865 | Metabolism               |
| 0.006694464 | Metabolism               |
| 0.475440287 | Metabolism               |
| 0.08159961  | Metabolism               |

|             |                          |
|-------------|--------------------------|
| 0.00300813  | Metabolism               |
| 0.062182158 | Metabolism               |
| 0.291873739 | Proliferation/Metastasis |
| 0.495311517 | Metabolism               |
| 4.00E-05    | Metabolism               |
| 2.97E-07    | Proliferation/Metastasis |
| 0.017187437 | Metabolism               |
| 1.93E-08    | Metabolism               |
| 0.021289525 | Metabolism               |
| 0.000346049 | Metabolism               |
| 0.053108385 | Metabolism               |
| 0.096619107 | Metabolism               |
| 0.024226956 | Metabolism               |
| 0.002280639 | Metabolism               |
| 0.21964319  | TME                      |
| 0.312229598 | TME                      |
| 0.16728948  | TME                      |
| 0.285264153 | TME                      |
| 0.708787479 | TME                      |
| 0.666375432 | Metabolism               |
| 0.715901141 | Metabolism               |
| 8.66E-14    | Proliferation/Metastasis |
| 9.86E-05    | Metabolism               |
| 8.28E-06    | Proliferation/Metastasis |
| 0.108596744 | Metabolism               |
| 0.017487499 | TME                      |
| 0.826718411 | Metabolism               |
| 0.211976283 | Metabolism               |
| 0.065405115 | Metabolism               |
| 0.022212584 | Metabolism               |
| 0.025327051 | TME                      |
| 0.001293353 | TME                      |
| 0.002620288 | Proliferation/Metastasis |
| 0.663624379 | Metabolism               |
| 0.003170252 | Proliferation/Metastasis |
| 0.051708718 | Proliferation/Metastasis |
| 0.001829614 | TME                      |
| 0.038228552 | TME                      |
| 0.008399586 | TME                      |
| 0.550759697 | TME                      |
| 3.96E-11    | Metabolism               |
| 8.21E-12    | Proliferation/Metastasis |
| 5.18E-38    | Metabolism               |

|             |                          |
|-------------|--------------------------|
| 0.002582641 | Metabolism               |
| 3.46E-16    | Proliferation/Metastasis |
| 0.606690625 | Proliferation/Metastasis |
| 2.91E-17    | Metabolism               |
| 0.00010447  | Metabolism               |
| 0.354454916 | Metabolism               |
| 5.15E-08    | Metabolism               |
| 0.043221616 | TME                      |
| 8.15E-18    | TME                      |
| 0.000179391 | TME                      |
| 0.005396922 | TME                      |
| 0.160513786 | TME                      |
| 0.031173423 | Metabolism               |
| 0.537162525 | Metabolism               |
| 0.000676279 | Metabolism               |
| 0.002528982 | Metabolism               |
| 8.70E-09    | Metabolism               |
| 0.425780461 | TME                      |
| 0.06082241  | TME                      |
| 0.004953707 | TME                      |
| 0.00071797  | TME                      |
| 0.003856946 | TME                      |
| 0.000255899 | TME                      |
| 0.003290131 | TME                      |
| 0.611800221 | TME                      |
| 0.83550122  | TME                      |
| 1.16E-43    | Proliferation/Metastasis |
| 4.68E-22    | Proliferation/Metastasis |
| 3.80E-14    | Metabolism               |
| 2.63E-16    | Metabolism               |
| 0.389095994 | TME                      |
| 0.050968043 | Metabolism               |
| 1.41E-10    | Metabolism               |
| 8.42E-14    | TME                      |
| 3.27E-17    | Proliferation/Metastasis |
| 1.25E-34    | Proliferation/Metastasis |
| 0.387233319 | TME                      |
| 0.041460117 | Metabolism               |
| 1.17E-10    | Metabolism               |
| 4.34E-45    | Proliferation/Metastasis |
| 0.014678319 | Proliferation/Metastasis |
| 1.09E-07    | TME                      |
| 0.000253388 | TME                      |

|             |                          |
|-------------|--------------------------|
| 6.31E-05    | TME                      |
| 5.39E-05    | TME                      |
| 1.03E-22    | Proliferation/Metastasis |
| 0.530649442 | TME                      |
| 1.13E-07    | TME                      |
| 2.34E-25    | Metabolism               |
| 0.973736282 | TME                      |
| 0.367499475 | TME                      |
| 0.350441806 | TME                      |
| 3.67E-10    | TME                      |
| 0.01307185  | Metabolism               |
| 6.06E-10    | Metabolism               |
| 0.000358481 | Metabolism               |
| 4.53E-05    | TME                      |
| 7.77E-10    | Metabolism               |
| 1.45E-05    | TME                      |
| 2.85E-05    | TME                      |
| 0.030933302 | TME                      |
| 0.103414707 | TME                      |
| 0.693781833 | TME                      |
| 0.001164909 | Metabolism               |
| 3.95E-47    | Proliferation/Metastasis |
| 0.008103928 | Metabolism               |
| 7.29E-13    | Proliferation/Metastasis |
| 2.46E-05    | Metabolism               |
| 0.974811551 | Metabolism               |
| 4.07E-23    | Metabolism               |
| 0.003085517 | Metabolism               |
| 8.38E-08    | Metabolism               |
| 0.416456707 | Metabolism               |
| 0.698355864 | Metabolism               |
| 0.008555461 | Metabolism               |
| 8.17E-08    | Metabolism               |
| 1.15E-10    | Metabolism               |
| 0.034564631 | Metabolism               |
| 2.52E-13    | Metabolism               |
| 0.662911953 | Metabolism               |
| 2.00E-05    | Metabolism               |
| 5.47E-06    | TME                      |
| 6.79E-07    | Proliferation/Metastasis |
| 1.95E-10    | Metabolism               |
| 0.000261882 | Proliferation/Metastasis |
| 0.052462894 | TME                      |



|             |                          |
|-------------|--------------------------|
| 0.001687027 | Proliferation/Metastasis |
| 3.26E-05    | Proliferation/Metastasis |
| 2.91E-05    | TME                      |
| 0.097755323 | TME                      |
| 1.36E-10    | Metabolism               |
| 0.005103533 | Metabolism               |
| 3.64E-32    | Proliferation/Metastasis |
| 4.20E-31    | Proliferation/Metastasis |
| 1.33E-05    | Proliferation/Metastasis |
| 7.54E-22    | Metabolism               |
| 0.519365724 | Metabolism               |
| 0.000188763 | Metabolism               |
| 1.66E-16    | Proliferation/Metastasis |
| 2.48E-06    | TME                      |
| 8.83E-06    | TME                      |
| 0.019437433 | Metabolism               |
| 1.36E-08    | Proliferation/Metastasis |
| 0.186219271 | Metabolism               |
| 3.07E-05    | TME                      |
| 9.17E-07    | TME                      |
| 0.259756643 | TME                      |
| 0.000155628 | TME                      |
| 0.404927851 | Metabolism               |
| 0.051593384 | TME                      |
| 2.99E-09    | Proliferation/Metastasis |
| 1.25E-05    | TME                      |
| 0.000834595 | Proliferation/Metastasis |
| 9.47E-43    | Proliferation/Metastasis |
| 0.103387584 | Metabolism               |
| 1.22E-37    | Proliferation/Metastasis |
| 4.72E-07    | TME                      |
| 1.17E-13    | Metabolism               |
| 0.30504627  | TME                      |
| 4.31E-13    | TME                      |
| 8.73E-17    | TME                      |
| 0.011220474 | TME                      |
| 0.0052289   | TME                      |
| 2.51E-06    | TME                      |
| 0.381976836 | Metabolism               |
| 0.306566763 | TME                      |
| 0.082359991 | Metabolism               |
| 0.148235844 | Metabolism               |
| 0.002312443 | Proliferation/Metastasis |

|             |                          |
|-------------|--------------------------|
| 2.55E-10    | Proliferation/Metastasis |
| 2.37E-23    | Metabolism               |
| 7.80E-08    | Metabolism               |
| 0.894381041 | Metabolism               |
| 4.52E-06    | Metabolism               |
| 5.58E-09    | Proliferation/Metastasis |
| 9.16E-14    | Proliferation/Metastasis |
| 0.388642153 | Metabolism               |
| 2.53E-11    | Metabolism               |
| 2.93E-12    | Metabolism               |
| 0.002339381 | TME                      |
| 0.00031151  | Metabolism               |
| 7.03E-14    | Metabolism               |
| 0.001863889 | Metabolism               |
| 0.014547091 | Metabolism               |
| 9.44E-13    | Proliferation/Metastasis |
| 2.99E-07    | Metabolism               |
| 1.55E-20    | Metabolism               |
| 0.043842119 | Metabolism               |
| 1.04E-18    | Metabolism               |
| 2.43E-23    | Metabolism               |
| 0.000582574 | Metabolism               |
| 1.92E-06    | Proliferation/Metastasis |
| 0.507593808 | Metabolism               |
| 3.29E-14    | Metabolism               |
| 9.22E-06    | Proliferation/Metastasis |
| 7.31E-09    | Metabolism               |
| 0.875763987 | Metabolism               |
| 0.783042529 | Metabolism               |
| 0.043138514 | Metabolism               |
| 0.83656596  | Metabolism               |
| 0.011611768 | Metabolism               |
| 0.915167937 | Metabolism               |
| 0.08189919  | Metabolism               |
| 2.32E-08    | TME                      |
| 0.001849526 | TME                      |
| 0.02532576  | TME                      |
| 0.000217933 | TME                      |
| 0.015823134 | TME                      |
| 1.10E-10    | Metabolism               |
| 1.43E-07    | Metabolism               |
| 0.0524659   | Proliferation/Metastasis |
| 3.47E-06    | Metabolism               |

|             |                          |
|-------------|--------------------------|
| 0.066746777 | Proliferation/Metastasis |
| 0.014741222 | Metabolism               |
| 4.17E-06    | TME                      |
| 0.099631006 | Metabolism               |
| 0.230110663 | Metabolism               |
| 0.298445909 | Metabolism               |
| 2.16E-06    | Metabolism               |
| 0.000503711 | TME                      |
| 0.002375658 | TME                      |
| 1.24E-15    | Proliferation/Metastasis |
| 6.17E-08    | Metabolism               |
| 9.92E-20    | Proliferation/Metastasis |
| 0.123968795 | Proliferation/Metastasis |
| 0.855435235 | TME                      |
| 0.006081977 | TME                      |
| 0.000164261 | TME                      |
| 5.57E-05    | TME                      |
| 0.245979971 | Metabolism               |
| 0.150431505 | Proliferation/Metastasis |
| 0.428622832 | Metabolism               |
| 0.149256467 | Metabolism               |
| 1.18E-13    | Proliferation/Metastasis |
| 3.55E-08    | Proliferation/Metastasis |
| 0.087144341 | Metabolism               |
| 0.875921259 | Metabolism               |
| 0.848573983 | Metabolism               |
| 0.043678256 | Metabolism               |
| 0.227107576 | TME                      |
| 4.88E-09    | TME                      |
| 6.34E-05    | TME                      |
| 0.005877238 | TME                      |
| 2.73E-08    | TME                      |
| 0.001773979 | Metabolism               |
| 0.001904771 | Metabolism               |
| 0.477457473 | Metabolism               |
| 0.322233778 | Metabolism               |
| 1.71E-05    | Metabolism               |
| 1.75E-11    | TME                      |
| 2.40E-07    | TME                      |
| 6.43E-05    | TME                      |
| 0.004896531 | TME                      |
| 5.89E-06    | TME                      |
| 1.96E-05    | TME                      |

|             |                          |
|-------------|--------------------------|
| 1.57E-05    | TME                      |
| 0.003090456 | TME                      |
| 0.001447542 | TME                      |
| 0.581989959 | Proliferation/Metastasis |
| 0.044135128 | Proliferation/Metastasis |
| 0.016109106 | Metabolism               |
| 0.318022999 | Metabolism               |
| 0.030681272 | TME                      |
| 0.368068188 | Metabolism               |
| 2.56E-07    | Metabolism               |
| 1.02E-06    | TME                      |
| 5.62E-05    | Proliferation/Metastasis |
| 0.053256642 | Proliferation/Metastasis |
| 0.290977161 | TME                      |
| 0.016608968 | Metabolism               |
| 0.720253169 | Metabolism               |
| 0.380620407 | Proliferation/Metastasis |
| 4.13E-08    | Proliferation/Metastasis |
| 1.62E-05    | TME                      |
| 0.000113228 | TME                      |
| 8.80E-06    | TME                      |
| 2.25E-07    | TME                      |
| 0.000294217 | Proliferation/Metastasis |
| 1.22E-11    | TME                      |
| 3.25E-06    | TME                      |
| 0.036232822 | Metabolism               |
| 9.94E-09    | TME                      |
| 3.51E-07    | TME                      |
| 0.001850511 | TME                      |
| 0.951319789 | TME                      |
| 0.028622437 | Metabolism               |
| 0.541101083 | Metabolism               |
| 0.057536249 | Metabolism               |
| 5.07E-09    | TME                      |
| 0.493984939 | Metabolism               |
| 0.000226685 | TME                      |
| 0.01333131  | TME                      |
| 0.000191946 | TME                      |
| 0.501982968 | TME                      |
| 0.013035413 | TME                      |
| 0.018902611 | Metabolism               |
| 0.736420754 | Proliferation/Metastasis |
| 0.004666866 | Metabolism               |

|             |                          |
|-------------|--------------------------|
| 4.35E-12    | Proliferation/Metastasis |
| 0.222814571 | Metabolism               |
| 0.021454825 | Metabolism               |
| 0.000801416 | Metabolism               |
| 0.120969431 | Metabolism               |
| 0.158854283 | Metabolism               |
| 0.021617411 | Metabolism               |
| 0.003030406 | Metabolism               |
| 0.00060724  | Metabolism               |
| 0.036650711 | Metabolism               |
| 0.000227905 | Metabolism               |
| 8.96E-08    | Metabolism               |
| 0.001328877 | Metabolism               |
| 0.078534576 | Metabolism               |
| 0.000132253 | Metabolism               |
| 7.32E-06    | TME                      |
| 5.35E-06    | Proliferation/Metastasis |
| 0.040455429 | Metabolism               |
| 0.000556169 | Proliferation/Metastasis |
| 3.77E-05    | TME                      |
| 1.04E-11    | Proliferation/Metastasis |
| 4.36E-09    | Proliferation/Metastasis |
| 7.94E-07    | TME                      |
| 0.001967993 | TME                      |
| 0.001239116 | Metabolism               |
| 2.89E-07    | Metabolism               |
| 0.020457064 | Proliferation/Metastasis |
| 0.279109162 | Proliferation/Metastasis |
| 2.04E-15    | Proliferation/Metastasis |
| 0.158509953 | Metabolism               |
| 0.89014751  | Metabolism               |
| 0.001297296 | Metabolism               |
| 4.88E-05    | Proliferation/Metastasis |
| 1.66E-07    | TME                      |
| 1.59E-06    | TME                      |
| 1.01E-05    | Metabolism               |
| 7.49E-09    | Proliferation/Metastasis |
| 6.23E-10    | Metabolism               |
| 5.43E-05    | TME                      |
| 2.72E-06    | TME                      |
| 0.000125408 | TME                      |
| 1.36E-09    | TME                      |
| 0.075283261 | Metabolism               |

|             |                          |
|-------------|--------------------------|
| 5.98E-10    | TME                      |
| 0.004355451 | Proliferation/Metastasis |
| 1.51E-06    | TME                      |
| 0.00812677  | Proliferation/Metastasis |
| 0.010849094 | Proliferation/Metastasis |
| 6.62E-11    | Metabolism               |
| 0.946199301 | Proliferation/Metastasis |
| 2.87E-07    | TME                      |
| 0.910729358 | Metabolism               |
| 0.829314527 | TME                      |
| 1.38E-10    | TME                      |
| 0.000177339 | TME                      |
| 3.07E-05    | TME                      |
| 0.847994612 | TME                      |
| 5.30E-08    | TME                      |
| 0.000311864 | Metabolism               |
| 1.00E-07    | TME                      |
| 0.497241066 | Metabolism               |
| 0.003354863 | Metabolism               |
| 1.70E-08    | Proliferation/Metastasis |
| 5.56E-05    | Proliferation/Metastasis |
| 0.066147953 | Metabolism               |
| 0.000427281 | Metabolism               |
| 4.96E-09    | Metabolism               |
| 0.00127634  | Metabolism               |
| 2.12E-05    | Proliferation/Metastasis |
| 1.56E-08    | Proliferation/Metastasis |
| 0.257260298 | Metabolism               |
| 0.016468976 | Metabolism               |
| 0.083200517 | Metabolism               |
| 8.58E-07    | TME                      |
| 0.235194103 | Metabolism               |
| 0.699036352 | Metabolism               |
| 0.002903485 | Metabolism               |
| 1.57E-08    | Metabolism               |
| 1.82E-06    | Proliferation/Metastasis |
| 0.540942047 | Metabolism               |
| 0.03817803  | Metabolism               |
| 0.713359053 | Metabolism               |
| 0.371563208 | Metabolism               |
| 0.005695683 | Metabolism               |
| 0.000506341 | Metabolism               |
| 0.515456659 | Proliferation/Metastasis |

|             |                          |
|-------------|--------------------------|
| 0.003955427 | Metabolism               |
| 0.179973628 | Metabolism               |
| 3.50E-17    | Proliferation/Metastasis |
| 0.579879035 | Metabolism               |
| 3.65E-10    | Metabolism               |
| 7.70E-05    | Metabolism               |
| 5.76E-11    | Metabolism               |
| 0.024850936 | Metabolism               |
| 0.002999727 | Metabolism               |
| 0.027084881 | Metabolism               |
| 0.007900428 | Metabolism               |
| 1.68E-07    | TME                      |
| 5.92E-07    | TME                      |
| 0.00040689  | TME                      |
| 2.94E-06    | TME                      |
| 0.000156798 | TME                      |
| 0.004879535 | Metabolism               |
| 0.517363195 | Metabolism               |
| 7.25E-11    | Proliferation/Metastasis |
| 0.687704593 | Metabolism               |
| 5.10E-08    | Proliferation/Metastasis |
| 0.730777769 | Metabolism               |
| 0.572943628 | TME                      |
| 0.087533343 | Metabolism               |
| 0.214389459 | Metabolism               |
| 0.036974773 | Metabolism               |
| 0.387348462 | Metabolism               |
| 0.000365232 | TME                      |
| 0.004600463 | TME                      |
| 0.002160141 | Proliferation/Metastasis |
| 0.386481014 | Metabolism               |
| 0.019529604 | Proliferation/Metastasis |
| 0.125580291 | Proliferation/Metastasis |
| 2.97E-07    | TME                      |
| 0.006643845 | TME                      |
| 2.28E-05    | TME                      |
| 5.63E-07    | TME                      |
| 0.309912473 | Metabolism               |
| 7.62E-08    | Proliferation/Metastasis |
| 0.98029759  | Metabolism               |
| 2.64E-17    | Metabolism               |
| 0.000252321 | Proliferation/Metastasis |
| 3.72E-07    | Proliferation/Metastasis |

|             |                          |
|-------------|--------------------------|
| 0.073409964 | Metabolism               |
| 0.925469212 | Metabolism               |
| 0.925030298 | Metabolism               |
| 0.001618662 | Metabolism               |
| 0.893793422 | TME                      |
| 0.000164081 | TME                      |
| 0.048949685 | TME                      |
| 0.307382233 | TME                      |
| 5.60E-14    | TME                      |
| 9.46E-07    | Metabolism               |
| 6.78E-06    | Metabolism               |
| 0.984465929 | Metabolism               |
| 8.68E-05    | Metabolism               |
| 0.398628943 | Metabolism               |
| 0.004751516 | TME                      |
| 0.823089642 | TME                      |
| 0.001863391 | TME                      |
| 0.456296524 | TME                      |
| 2.90E-08    | TME                      |
| 0.000490731 | TME                      |
| 7.00E-05    | TME                      |
| 2.21E-05    | TME                      |
| 0.00148787  | TME                      |
| 0.029742948 | Proliferation/Metastasis |
| 3.53E-07    | Proliferation/Metastasis |
| 0.897554428 | Metabolism               |
| 0.000282736 | Metabolism               |
| 0.568012425 | TME                      |
| 0.679000165 | Metabolism               |
| 0.024966933 | Metabolism               |
| 2.30E-07    | TME                      |
| 3.42E-07    | Proliferation/Metastasis |
| 9.33E-06    | Proliferation/Metastasis |
| 0.965175546 | TME                      |
| 0.019145151 | Metabolism               |
| 3.85E-06    | Metabolism               |
| 0.038678142 | Proliferation/Metastasis |
| 0.005426995 | Proliferation/Metastasis |
| 0.023963618 | TME                      |
| 2.81E-07    | TME                      |
| 0.004522517 | TME                      |
| 0.000142108 | TME                      |
| 0.484709556 | Proliferation/Metastasis |



|             |                          |
|-------------|--------------------------|
| 0.263742353 | TME                      |
| 1.60E-11    | TME                      |
| 0.876039389 | Metabolism               |
| 8.24E-11    | TME                      |
| 3.36E-13    | TME                      |
| 3.45E-05    | TME                      |
| 0.084175353 | TME                      |
| 0.039945226 | Metabolism               |
| 1.35E-05    | Metabolism               |
| 1.93E-07    | Metabolism               |
| 4.36E-06    | TME                      |
| 0.01105947  | Metabolism               |
| 0.044067502 | TME                      |
| 0.714244079 | TME                      |
| 0.000105816 | TME                      |
| 1.13E-07    | TME                      |
| 7.46E-06    | TME                      |
| 5.64E-09    | Metabolism               |
| 0.989094015 | Proliferation/Metastasis |
| 2.37E-21    | Metabolism               |
| 0.244618266 | Proliferation/Metastasis |
| 0.00136874  | Metabolism               |
| 0.135582721 | Metabolism               |
| 0.76928072  | Metabolism               |
| 0.000933493 | Metabolism               |
| 0.000221694 | Metabolism               |
| 9.56E-10    | Metabolism               |
| 0.627753351 | Metabolism               |
| 1.06E-06    | Metabolism               |
| 3.52E-05    | Metabolism               |
| 0.00417845  | Metabolism               |
| 1.08E-08    | Metabolism               |
| 1.22E-05    | Metabolism               |
| 0.034839189 | Metabolism               |
| 0.293625398 | Metabolism               |
| 3.18E-13    | TME                      |
| 0.001334023 | Proliferation/Metastasis |
| 0.000204788 | Metabolism               |
| 1.33E-17    | Proliferation/Metastasis |
| 0.009108967 | TME                      |
| 1.77E-12    | Proliferation/Metastasis |
| 1.10E-18    | Proliferation/Metastasis |
| 1.06E-18    | TME                      |

|             |                          |
|-------------|--------------------------|
| 8.49E-18    | TME                      |
| 2.28E-08    | Metabolism               |
| 0.053435715 | Metabolism               |
| 1.14E-06    | Proliferation/Metastasis |
| 0.397420498 | Proliferation/Metastasis |
| 8.42E-11    | Proliferation/Metastasis |
| 0.067911302 | Metabolism               |
| 0.983482872 | Metabolism               |
| 3.79E-18    | Metabolism               |
| 5.19E-08    | Proliferation/Metastasis |
| 9.81E-14    | TME                      |
| 6.25E-10    | TME                      |
| 0.206152119 | Metabolism               |
| 0.047235522 | Proliferation/Metastasis |
| 0.708154451 | Metabolism               |
| 0.536697967 | TME                      |
| 0.048427513 | TME                      |
| 1.04E-08    | TME                      |
| 0.003840721 | TME                      |
| 0.107574554 | Metabolism               |
| 7.01E-06    | TME                      |
| 0.004447219 | Proliferation/Metastasis |
| 7.40E-21    | TME                      |
| 0.434132668 | Proliferation/Metastasis |
| 2.03E-06    | Proliferation/Metastasis |
| 0.000445193 | Metabolism               |
| 0.013514666 | Proliferation/Metastasis |
| 7.96E-07    | TME                      |
| 0.652385493 | Metabolism               |
| 0.117518615 | TME                      |
| 0.430142733 | TME                      |
| 0.056974069 | TME                      |
| 3.73E-06    | TME                      |
| 8.59E-11    | TME                      |
| 0.014472147 | TME                      |
| 0.000597368 | Metabolism               |
| 3.05E-21    | TME                      |
| 1.51E-12    | Metabolism               |
| 5.69E-08    | Metabolism               |
| 5.90E-13    | Proliferation/Metastasis |
| 0.00222544  | Proliferation/Metastasis |
| 0.361736447 | Metabolism               |
| 0.041146861 | Metabolism               |

|             |                          |
|-------------|--------------------------|
| 0.751260208 | Metabolism               |
| 2.92E-07    | Metabolism               |
| 6.47E-14    | Proliferation/Metastasis |
| 2.07E-10    | Proliferation/Metastasis |
| 0.526012896 | Metabolism               |
| 0.682207044 | Metabolism               |
| 6.45E-08    | Metabolism               |
| 0.004600929 | TME                      |
| 0.055180655 | Metabolism               |
| 0.881535576 | Metabolism               |
| 0.201577821 | Metabolism               |
| 0.722023276 | Metabolism               |
| 5.70E-06    | Proliferation/Metastasis |
| 0.670312221 | Metabolism               |
| 0.001159429 | Metabolism               |
| 1.30E-09    | Metabolism               |
| 0.000819139 | Metabolism               |
| 1.02E-11    | Metabolism               |
| 0.028554882 | Metabolism               |
| 0.262079878 | Proliferation/Metastasis |
| 0.055158415 | Metabolism               |
| 3.34E-05    | Metabolism               |
| 0.072610045 | Proliferation/Metastasis |
| 2.97E-08    | Metabolism               |
| 2.85E-13    | Metabolism               |
| 0.666497599 | Metabolism               |
| 6.13E-07    | Metabolism               |
| 0.363160724 | Metabolism               |
| 0.105850557 | Metabolism               |
| 0.095544015 | Metabolism               |
| 0.00029395  | Metabolism               |
| 8.06E-07    | TME                      |
| 1.12E-13    | TME                      |
| 2.88E-08    | TME                      |
| 1.69E-06    | TME                      |
| 0.013503328 | TME                      |
| 3.79E-05    | Metabolism               |
| 0.094751387 | Metabolism               |
| 3.08E-05    | Proliferation/Metastasis |
| 0.786425389 | Metabolism               |
| 8.90E-19    | Proliferation/Metastasis |
| 0.266522587 | Metabolism               |
| 5.38E-14    | TME                      |

|             |                          |
|-------------|--------------------------|
| 0.529534047 | Metabolism               |
| 0.025885765 | Metabolism               |
| 3.93E-10    | Metabolism               |
| 2.00E-05    | Metabolism               |
| 0.070410317 | TME                      |
| 0.041720596 | TME                      |
| 0.017676515 | Proliferation/Metastasis |
| 0.00239527  | Metabolism               |
| 0.023447793 | Proliferation/Metastasis |
| 3.01E-13    | Proliferation/Metastasis |
| 0.246062279 | TME                      |
| 0.923616305 | TME                      |
| 0.643847284 | TME                      |
| 0.279196517 | TME                      |
| 3.21E-05    | Metabolism               |
| 4.17E-07    | Proliferation/Metastasis |
| 0.001696265 | Metabolism               |
| 0.059322036 | Metabolism               |
| 6.25E-05    | Proliferation/Metastasis |
| 0.708150351 | Proliferation/Metastasis |
| 6.85E-06    | Metabolism               |
| 0.000751388 | Metabolism               |
| 0.00758194  | Metabolism               |
| 0.294838523 | Metabolism               |
| 0.004999101 | TME                      |
| 0.008397008 | TME                      |
| 0.080900126 | TME                      |
| 0.761078584 | TME                      |
| 0.329037049 | TME                      |
| 0.401082269 | Metabolism               |
| 0.004472324 | Metabolism               |
| 0.199169372 | Metabolism               |
| 0.605891817 | Metabolism               |
| 4.32E-05    | Metabolism               |
| 0.172809714 | TME                      |
| 0.004692811 | TME                      |
| 0.681230048 | TME                      |
| 0.409331988 | TME                      |
| 0.785948533 | TME                      |
| 0.660109996 | TME                      |
| 0.962794757 | TME                      |
| 0.049523443 | TME                      |
| 0.070817917 | TME                      |

|             |                          |
|-------------|--------------------------|
| 1.88E-06    | Proliferation/Metastasis |
| 1.84E-08    | Proliferation/Metastasis |
| 9.54E-07    | Metabolism               |
| 9.52E-06    | Metabolism               |
| 0.435024044 | TME                      |
| 0.830695584 | Metabolism               |
| 0.968777427 | Metabolism               |
| 0.255550612 | TME                      |
| 0.002197335 | Proliferation/Metastasis |
| 0.000123703 | Proliferation/Metastasis |
| 0.417843968 | TME                      |
| 3.32E-05    | Metabolism               |
| 0.163900956 | Metabolism               |
| 6.77E-07    | Proliferation/Metastasis |
| 0.574182028 | Proliferation/Metastasis |
| 0.128495271 | TME                      |
| 0.701768503 | TME                      |
| 0.585309056 | TME                      |
| 0.748683763 | TME                      |
| 3.91E-09    | Proliferation/Metastasis |
| 0.149073311 | TME                      |
| 0.238093336 | TME                      |
| 0.01428943  | Metabolism               |
| 0.593756783 | TME                      |
| 0.79676449  | TME                      |
| 0.203717674 | TME                      |
| 0.055120669 | TME                      |
| 0.162116534 | Metabolism               |
| 0.230482216 | Metabolism               |
| 0.009245675 | Metabolism               |
| 0.019016698 | TME                      |
| 0.002010806 | Metabolism               |
| 0.192974083 | TME                      |
| 0.903338701 | TME                      |
| 0.832067053 | TME                      |
| 0.012468673 | TME                      |
| 0.419279278 | TME                      |
| 0.239492268 | Metabolism               |
| 1.22E-08    | Proliferation/Metastasis |
| 0.020482345 | Metabolism               |
| 0.003108973 | Proliferation/Metastasis |
| 0.411524878 | Metabolism               |
| 0.992794467 | Metabolism               |

|             |                          |
|-------------|--------------------------|
| 0.051114945 | Metabolism               |
| 0.518113559 | Metabolism               |
| 0.026815766 | Metabolism               |
| 0.781483715 | Metabolism               |
| 0.398608039 | Metabolism               |
| 0.596290693 | Metabolism               |
| 0.078796471 | Metabolism               |
| 0.592212644 | Metabolism               |
| 0.501026362 | Metabolism               |
| 0.143716969 | Metabolism               |
| 0.167804882 | Metabolism               |
| 0.000803809 | Metabolism               |
| 0.354985294 | TME                      |
| 0.439425332 | Proliferation/Metastasis |
| 0.212447092 | Metabolism               |
| 0.032680972 | Proliferation/Metastasis |
| 0.50938681  | TME                      |
| 0.673364704 | Proliferation/Metastasis |
| 0.650672184 | Proliferation/Metastasis |
| 0.279712683 | TME                      |
| 0.445177686 | TME                      |
| 0.026672605 | Metabolism               |
| 0.005494509 | Metabolism               |
| 0.000557874 | Proliferation/Metastasis |
| 8.19E-12    | Proliferation/Metastasis |
| 0.191316882 | Proliferation/Metastasis |
| 4.71E-05    | Metabolism               |
| 0.246113175 | Metabolism               |
| 3.23E-05    | Metabolism               |
| 0.116749676 | Proliferation/Metastasis |
| 0.438913473 | TME                      |
| 0.593691757 | TME                      |
| 0.807740024 | Metabolism               |
| 0.515753435 | Proliferation/Metastasis |
| 0.000288094 | Metabolism               |
| 0.301714089 | TME                      |
| 0.171496079 | TME                      |
| 0.070337606 | TME                      |
| 0.085735618 | TME                      |
| 0.000707478 | Metabolism               |
| 0.600195892 | TME                      |
| 5.16E-07    | Proliferation/Metastasis |
| 0.402197344 | TME                      |

|             |                          |
|-------------|--------------------------|
| 0.070163165 | Proliferation/Metastasis |
| 5.07E-08    | Proliferation/Metastasis |
| 0.161304235 | Metabolism               |
| 2.03E-06    | Proliferation/Metastasis |
| 0.582587376 | TME                      |
| 5.99E-06    | Metabolism               |
| 0.282315019 | TME                      |
| 0.374890165 | TME                      |
| 0.059647176 | TME                      |
| 0.405551929 | TME                      |
| 0.017985713 | TME                      |
| 0.603011514 | TME                      |
| 0.14333155  | Metabolism               |
| 0.487296719 | TME                      |
| 0.011725516 | Metabolism               |
| 0.725833364 | Metabolism               |
| 0.985322021 | Proliferation/Metastasis |
| 0.0366878   | Proliferation/Metastasis |
| 6.22E-05    | Metabolism               |
| 0.112702509 | Metabolism               |
| 0.742882153 | Metabolism               |
| 0.223404623 | Metabolism               |
| 0.438055443 | Proliferation/Metastasis |
| 0.291469408 | Proliferation/Metastasis |
| 0.134971912 | Metabolism               |
| 0.401071813 | Metabolism               |
| 0.001937337 | Metabolism               |
| 0.057212429 | TME                      |
| 0.066054842 | Metabolism               |
| 0.005297341 | Metabolism               |
| 0.506835744 | Metabolism               |
| 0.013378353 | Metabolism               |
| 7.82E-10    | Proliferation/Metastasis |
| 0.91533003  | Metabolism               |
| 2.49E-07    | Metabolism               |
| 0.02777493  | Metabolism               |
| 7.16E-06    | Metabolism               |
| 0.001464674 | Metabolism               |
| 0.000410569 | Metabolism               |
| 0.011845463 | Proliferation/Metastasis |
| 5.35E-05    | Metabolism               |
| 0.064208861 | Metabolism               |
| 0.698757297 | Proliferation/Metastasis |

|             |                          |
|-------------|--------------------------|
| 0.000156144 | Metabolism               |
| 0.256295584 | Metabolism               |
| 0.034733896 | Metabolism               |
| 0.817537991 | Metabolism               |
| 0.202784727 | Metabolism               |
| 0.012148492 | Metabolism               |
| 0.632908981 | Metabolism               |
| 0.331903654 | Metabolism               |
| 0.257961188 | TME                      |
| 0.491145837 | TME                      |
| 0.768777887 | TME                      |
| 0.678347379 | TME                      |
| 0.857194129 | TME                      |
| 1.31E-06    | Metabolism               |
| 0.000213801 | Metabolism               |
| 0.457796243 | Proliferation/Metastasis |
| 0.396308473 | Metabolism               |
| 0.775879554 | Proliferation/Metastasis |
| 0.488934042 | Metabolism               |
| 0.430924685 | TME                      |
| 0.057349886 | Metabolism               |
| 0.772495361 | Metabolism               |
| 0.107218435 | Metabolism               |
| 0.381179984 | Metabolism               |
| 0.106426693 | TME                      |
| 0.016544026 | TME                      |
| 0.418255804 | Proliferation/Metastasis |
| 0.02695891  | Metabolism               |
| 3.42E-05    | Proliferation/Metastasis |
| 0.179199219 | Proliferation/Metastasis |
| 0.789109243 | TME                      |
| 0.0001258   | TME                      |
| 5.72E-06    | TME                      |
| 6.24E-05    | TME                      |
| 0.747454191 | Metabolism               |
| 0.000153764 | Proliferation/Metastasis |
| 0.010548857 | Metabolism               |
| 5.74E-06    | Metabolism               |
| 6.88E-05    | Proliferation/Metastasis |
| 4.98E-11    | Proliferation/Metastasis |
| 0.001943872 | Metabolism               |
| 0.114749873 | Metabolism               |
| 0.031388629 | Metabolism               |



|             |                          |
|-------------|--------------------------|
| 9.23E-09    | Metabolism               |
| 0.001357884 | TME                      |
| 4.33E-09    | TME                      |
| 0.000269431 | TME                      |
| 0.013172261 | TME                      |
| 0.969807456 | TME                      |
| 0.036774211 | Metabolism               |
| 0.097093392 | Metabolism               |
| 0.220622648 | Metabolism               |
| 1.10E-07    | Metabolism               |
| 0.009117918 | Metabolism               |
| 1.59E-05    | TME                      |
| 0.00110921  | TME                      |
| 1.57E-10    | TME                      |
| 0.0007273   | TME                      |
| 7.39E-06    | TME                      |
| 7.69E-06    | TME                      |
| 7.74E-06    | TME                      |
| 9.29E-05    | TME                      |
| 4.27E-05    | TME                      |
| 6.14E-07    | Proliferation/Metastasis |
| 3.15E-07    | Proliferation/Metastasis |
| 0.828953472 | Metabolism               |
| 0.153296306 | Metabolism               |
| 0.000992172 | TME                      |
| 0.062079108 | Metabolism               |
| 0.746559487 | Metabolism               |
| 6.61E-11    | TME                      |
| 0.073576858 | Proliferation/Metastasis |
| 3.05E-05    | Proliferation/Metastasis |
| 0.031360883 | TME                      |
| 1.69E-05    | Metabolism               |
| 0.321822277 | Metabolism               |
| 1.18E-06    | Proliferation/Metastasis |
| 8.38E-08    | Proliferation/Metastasis |
| 0.000517669 | TME                      |
| 1.31E-11    | TME                      |
| 5.92E-05    | TME                      |
| 8.84E-07    | TME                      |
| 0.5423008   | Proliferation/Metastasis |
| 2.07E-06    | TME                      |
| 6.19E-09    | TME                      |
| 0.000621854 | Metabolism               |

|             |                          |
|-------------|--------------------------|
| 1.61E-08    | TME                      |
| 1.15E-09    | TME                      |
| 1.72E-05    | TME                      |
| 0.043447799 | TME                      |
| 0.022083422 | Metabolism               |
| 0.000664381 | Metabolism               |
| 0.029668902 | Metabolism               |
| 5.71E-11    | TME                      |
| 0.364282437 | Metabolism               |
| 0.005040797 | TME                      |
| 0.029626294 | TME                      |
| 7.59E-07    | TME                      |
| 7.03E-05    | TME                      |
| 0.003261389 | TME                      |
| 0.118432945 | Metabolism               |
| 8.65E-07    | Proliferation/Metastasis |
| 7.29E-05    | Metabolism               |
| 1.57E-05    | Proliferation/Metastasis |
| 0.546940497 | Metabolism               |
| 0.061267351 | Metabolism               |
| 0.919082086 | Metabolism               |
| 0.732029668 | Metabolism               |
| 0.554969806 | Metabolism               |
| 9.16E-08    | Metabolism               |
| 0.574647838 | Metabolism               |
| 0.002394686 | Metabolism               |
| 1.77E-08    | Metabolism               |
| 1.59E-10    | Metabolism               |
| 1.13E-10    | Metabolism               |
| 0.991975507 | Metabolism               |
| 5.25E-09    | Metabolism               |
| 0.018958739 | Metabolism               |
| 1.60E-10    | TME                      |
| 0.39658767  | Proliferation/Metastasis |
| 0.001527499 | Metabolism               |
| 1.05E-07    | Proliferation/Metastasis |
| 2.66E-06    | TME                      |
| 5.77E-12    | Proliferation/Metastasis |
| 4.17E-11    | Proliferation/Metastasis |
| 6.13E-07    | TME                      |
| 8.34E-11    | TME                      |
| 0.160963136 | Metabolism               |
| 0.057642264 | Metabolism               |

|             |                          |
|-------------|--------------------------|
| 0.939719224 | Proliferation/Metastasis |
| 0.002560443 | Proliferation/Metastasis |
| 2.98E-12    | Proliferation/Metastasis |
| 0.686841113 | Metabolism               |
| 3.98E-05    | Metabolism               |
| 5.22E-12    | Metabolism               |
| 7.12E-11    | Proliferation/Metastasis |
| 6.68E-09    | TME                      |
| 3.07E-10    | TME                      |
| 0.000526431 | Metabolism               |
| 2.51E-05    | Proliferation/Metastasis |
| 0.007172141 | Metabolism               |
| 0.003652682 | TME                      |
| 0.037990765 | TME                      |
| 3.89E-11    | TME                      |
| 5.90E-09    | TME                      |
| 0.001029211 | Metabolism               |
| 0.000250067 | TME                      |
| 0.038321947 | Proliferation/Metastasis |
| 1.09E-16    | TME                      |
| 0.30079578  | Proliferation/Metastasis |
| 0.408575044 | Proliferation/Metastasis |
| 0.006082038 | Metabolism               |
| 0.053461706 | Proliferation/Metastasis |
| 5.17E-07    | TME                      |
| 0.36257301  | Metabolism               |
| 0.461348975 | TME                      |
| 0.000599706 | TME                      |
| 0.02218566  | TME                      |
| 8.09E-08    | TME                      |
| 0.029304596 | TME                      |
| 0.001283728 | TME                      |
| 6.90E-06    | Metabolism               |
| 1.03E-16    | TME                      |
| 0.003733613 | Metabolism               |
| 0.678391082 | Metabolism               |
| 6.75E-10    | Proliferation/Metastasis |
| 0.006535657 | Proliferation/Metastasis |
| 0.017608489 | Metabolism               |
| 0.000121903 | Metabolism               |
| 0.653052534 | Metabolism               |
| 0.616574136 | Metabolism               |
| 1.69E-05    | Proliferation/Metastasis |

|             |                          |
|-------------|--------------------------|
| 0.609301568 | Proliferation/Metastasis |
| 0.69797052  | Metabolism               |
| 4.85E-05    | Metabolism               |
| 0.799056511 | Metabolism               |
| 5.03E-13    | TME                      |
| 0.00151279  | Metabolism               |
| 0.482997894 | Metabolism               |
| 3.41E-08    | Metabolism               |
| 0.651513891 | Metabolism               |
| 0.424583928 | Proliferation/Metastasis |
| 0.001922141 | Metabolism               |
| 0.001169179 | Metabolism               |
| 0.000177058 | Metabolism               |
| 0.668412561 | Metabolism               |
| 0.379118032 | Metabolism               |
| 0.199457236 | Metabolism               |
| 0.019282922 | Proliferation/Metastasis |
| 0.002346363 | Metabolism               |
| 3.17E-05    | Metabolism               |
| 5.14E-05    | Proliferation/Metastasis |
| 9.92E-06    | Metabolism               |
| 0.213825633 | Metabolism               |
| 2.88E-05    | Metabolism               |
| 0.019226503 | Metabolism               |
| 0.562254745 | Metabolism               |
| 0.00064704  | Metabolism               |
| 0.148869455 | Metabolism               |
| 2.48E-05    | Metabolism               |
| 5.63E-09    | TME                      |
| 4.11E-11    | TME                      |
| 1.22E-10    | TME                      |
| 5.76E-08    | TME                      |
| 7.51E-06    | TME                      |
| 0.038607031 | Metabolism               |
| 0.526036229 | Metabolism               |
| 0.244416299 | Proliferation/Metastasis |
| 0.001392554 | Metabolism               |
| 2.15E-11    | Proliferation/Metastasis |
| 0.869639636 | Metabolism               |
| 4.41E-10    | TME                      |
| 0.40596549  | Metabolism               |
| 0.809814542 | Metabolism               |
| 4.37E-10    | Metabolism               |

|             |                          |
|-------------|--------------------------|
| 0.000273132 | Metabolism               |
| 2.37E-08    | TME                      |
| 0.000229708 | TME                      |
| 0.007476603 | Proliferation/Metastasis |
| 0.714806467 | Metabolism               |
| 0.074447366 | Proliferation/Metastasis |
| 0.102433129 | Proliferation/Metastasis |
| 0.141839514 | TME                      |
| 0.398125341 | TME                      |
| 0.35885332  | TME                      |
| 0.546975914 | TME                      |
| 0.070236886 | Metabolism               |
| 0.341420484 | Proliferation/Metastasis |
| 0.028553458 | Metabolism               |
| 0.073638341 | Metabolism               |
| 0.159135887 | Proliferation/Metastasis |
| 6.22E-10    | Proliferation/Metastasis |
| 0.365858229 | Metabolism               |
| 0.02504469  | Metabolism               |
| 0.026093637 | Metabolism               |
| 0.536593042 | Metabolism               |
| 0.22539491  | TME                      |
| 0.733348038 | TME                      |
| 0.032501549 | TME                      |
| 0.605579963 | TME                      |
| 0.005123644 | TME                      |
| 0.000567413 | Metabolism               |
| 0.784587838 | Metabolism               |
| 0.837792658 | Metabolism               |
| 0.853715755 | Metabolism               |
| 0.000105637 | Metabolism               |
| 0.00016825  | TME                      |
| 0.389889964 | TME                      |
| 0.999952543 | TME                      |
| 0.097914567 | TME                      |
| 0.575126076 | TME                      |
| 0.845316071 | TME                      |
| 0.855288846 | TME                      |
| 0.499160213 | TME                      |
| 0.255217177 | TME                      |
| 0.003042326 | Proliferation/Metastasis |
| 0.875387045 | Proliferation/Metastasis |
| 0.722896498 | Metabolism               |

|             |                          |
|-------------|--------------------------|
| 0.211160106 | Metabolism               |
| 0.044982513 | TME                      |
| 0.7572861   | Metabolism               |
| 0.426950544 | Metabolism               |
| 0.021135157 | TME                      |
| 0.000210096 | Proliferation/Metastasis |
| 5.47E-06    | Proliferation/Metastasis |
| 0.588119082 | TME                      |
| 0.160080467 | Metabolism               |
| 0.636294351 | Metabolism               |
| 0.02425207  | Proliferation/Metastasis |
| 6.61E-08    | Proliferation/Metastasis |
| 0.248160173 | TME                      |
| 0.024124968 | TME                      |
| 0.419322969 | TME                      |
| 0.117482205 | TME                      |
| 0.986942564 | Proliferation/Metastasis |
| 0.001123069 | TME                      |
| 0.008945194 | TME                      |
| 0.000505501 | Metabolism               |
| 0.342678296 | TME                      |
| 0.059784938 | TME                      |
| 0.367579698 | TME                      |
| 0.736223253 | TME                      |
| 0.293213933 | Metabolism               |
| 0.297870356 | Metabolism               |
| 0.929547413 | Metabolism               |
| 5.45E-05    | TME                      |
| 0.000485298 | Metabolism               |
| 0.063646731 | TME                      |
| 0.121532791 | TME                      |
| 0.106136206 | TME                      |
| 0.106334602 | TME                      |
| 0.941507853 | TME                      |
| 0.002677031 | Metabolism               |
| 0.268320388 | Proliferation/Metastasis |
| 0.367155034 | Metabolism               |
| 0.03037872  | Proliferation/Metastasis |
| 0.298525605 | Metabolism               |
| 0.004963326 | Metabolism               |
| 0.471777562 | Metabolism               |
| 0.780741146 | Metabolism               |
| 0.03314363  | Metabolism               |

|             |                          |
|-------------|--------------------------|
| 0.00218637  | Metabolism               |
| 0.361779983 | Metabolism               |
| 0.171691769 | Metabolism               |
| 0.007843984 | Metabolism               |
| 0.775623795 | Metabolism               |
| 0.744510725 | Metabolism               |
| 0.75630125  | Metabolism               |
| 0.010758294 | Metabolism               |
| 0.323974525 | Metabolism               |
| 0.008116107 | TME                      |
| 0.240232876 | Proliferation/Metastasis |
| 0.091129989 | Metabolism               |
| 1.58E-05    | Proliferation/Metastasis |
| 0.658364273 | TME                      |
| 0.000183977 | Proliferation/Metastasis |
| 6.93E-07    | Proliferation/Metastasis |
| 0.063280879 | TME                      |
| 9.54E-07    | TME                      |
| 0.381642901 | Metabolism               |
| 1.60E-09    | Metabolism               |
| 0.491583219 | Proliferation/Metastasis |
| 0.422453898 | Proliferation/Metastasis |
| 1.42E-05    | Proliferation/Metastasis |
| 0.076379599 | Metabolism               |
| 0.319136161 | Metabolism               |
| 0.018402859 | Metabolism               |
| 0.01012051  | Proliferation/Metastasis |
| 0.012627614 | TME                      |
| 0.045065291 | TME                      |
| 1.03E-06    | Metabolism               |
| 3.03E-05    | Proliferation/Metastasis |
| 1.52E-07    | Metabolism               |
| 0.26368065  | TME                      |
| 0.087932314 | TME                      |
| 0.045938493 | TME                      |
| 0.000751991 | TME                      |
| 0.530180287 | Metabolism               |
| 0.011194881 | TME                      |
| 0.047986042 | Proliferation/Metastasis |
| 0.000996069 | TME                      |
| 0.001585861 | Proliferation/Metastasis |
| 0.067923273 | Proliferation/Metastasis |
| 2.16E-10    | Metabolism               |

|             |                          |
|-------------|--------------------------|
| 0.417838485 | Proliferation/Metastasis |
| 0.026232138 | TME                      |
| 0.007818747 | Metabolism               |
| 0.199669999 | TME                      |
| 0.06530629  | TME                      |
| 0.257753191 | TME                      |
| 0.361253715 | TME                      |
| 0.754146648 | TME                      |
| 0.017715423 | TME                      |
| 0.32337447  | Metabolism               |
| 1.22E-08    | TME                      |
| 0.542303695 | Metabolism               |
| 0.446843465 | Metabolism               |
| 1.52E-11    | Proliferation/Metastasis |
| 0.065838353 | Proliferation/Metastasis |
| 0.072760836 | Metabolism               |
| 0.207604557 | Metabolism               |
| 0.076446388 | Metabolism               |
| 0.070917969 | Metabolism               |
| 0.005607852 | Proliferation/Metastasis |
| 2.50E-07    | Proliferation/Metastasis |
| 9.47E-06    | Metabolism               |
| 0.710972798 | Metabolism               |
| 0.513583015 | Metabolism               |
| 0.000982637 | TME                      |
| 0.133040932 | Metabolism               |
| 0.141296051 | Metabolism               |
| 0.000192689 | Metabolism               |
| 0.014088732 | Metabolism               |
| 0.263724049 | Proliferation/Metastasis |
| 0.054619915 | Metabolism               |
| 0.006277481 | Metabolism               |
| 0.047806357 | Metabolism               |
| 0.444297715 | Metabolism               |
| 0.01060747  | Metabolism               |
| 0.0543711   | Metabolism               |
| 0.058479846 | Proliferation/Metastasis |
| 0.10353483  | Metabolism               |
| 0.005044096 | Metabolism               |
| 0.175974017 | Proliferation/Metastasis |
| 0.796374631 | Metabolism               |
| 0.022936136 | Metabolism               |
| 0.615326101 | Metabolism               |



|             |                          |
|-------------|--------------------------|
| 0.016009409 | Metabolism               |
| 0.258500884 | Metabolism               |
| 0.010495422 | Metabolism               |
| 3.92E-07    | Metabolism               |
| 0.895895291 | Metabolism               |
| 0.155180295 | TME                      |
| 0.08708069  | TME                      |
| 3.47E-05    | TME                      |
| 0.009197032 | TME                      |
| 0.38911435  | TME                      |
| 0.694734709 | Metabolism               |
| 0.000934293 | Metabolism               |
| 0.002743303 | Proliferation/Metastasis |
| 0.000335131 | Metabolism               |
| 4.25E-09    | Proliferation/Metastasis |
| 0.444555151 | Metabolism               |
| 0.607162921 | TME                      |
| 0.363506312 | Metabolism               |
| 0.330197247 | Metabolism               |
| 0.000774407 | Metabolism               |
| 0.872279428 | Metabolism               |
| 0.001047981 | TME                      |
| 0.516859301 | TME                      |
| 5.77E-08    | Proliferation/Metastasis |
| 0.101122908 | Metabolism               |
| 0.398712224 | Proliferation/Metastasis |
| 0.865023359 | Proliferation/Metastasis |
| 0.126897142 | TME                      |
| 4.32E-11    | TME                      |
| 7.66E-07    | TME                      |
| 0.000100266 | TME                      |
| 3.18E-18    | Metabolism               |
| 1.99E-11    | Proliferation/Metastasis |
| 2.00E-14    | Metabolism               |
| 0.079072122 | Metabolism               |
| 2.23E-05    | Proliferation/Metastasis |
| 1.01E-08    | Proliferation/Metastasis |
| 3.98E-05    | Metabolism               |
| 1.27E-05    | Metabolism               |
| 0.124221115 | Metabolism               |
| 6.79E-06    | Metabolism               |
| 5.02E-07    | TME                      |
| 5.15E-17    | TME                      |

|             |                          |
|-------------|--------------------------|
| 2.32E-11    | TME                      |
| 3.66E-10    | TME                      |
| 0.571475931 | TME                      |
| 0.427710888 | Metabolism               |
| 0.000527446 | Metabolism               |
| 0.005445027 | Metabolism               |
| 0.004149312 | Metabolism               |
| 3.86E-10    | Metabolism               |
| 3.03E-07    | TME                      |
| 1.28E-05    | TME                      |
| 4.65E-11    | TME                      |
| 1.02E-09    | TME                      |
| 9.50E-05    | TME                      |
| 3.33E-06    | TME                      |
| 2.15E-05    | TME                      |
| 0.008911793 | TME                      |
| 0.004350328 | TME                      |
| 7.73E-31    | Proliferation/Metastasis |
| 1.15E-18    | Proliferation/Metastasis |
| 1.63E-19    | Metabolism               |
| 2.01E-16    | Metabolism               |
| 0.000422539 | TME                      |
| 0.025268739 | Metabolism               |
| 0.010707086 | Metabolism               |
| 1.24E-13    | TME                      |
| 1.21E-24    | Proliferation/Metastasis |
| 1.25E-33    | Proliferation/Metastasis |
| 1.17E-07    | TME                      |
| 0.436043982 | Metabolism               |
| 5.84E-14    | Metabolism               |
| 2.05E-35    | Proliferation/Metastasis |
| 1.00E-10    | Proliferation/Metastasis |
| 2.66E-08    | TME                      |
| 2.47E-16    | TME                      |
| 6.76E-08    | TME                      |
| 5.13E-06    | TME                      |
| 1.87E-20    | Proliferation/Metastasis |
| 2.98E-08    | TME                      |
| 3.87E-10    | TME                      |
| 1.18E-13    | Metabolism               |
| 1.24E-05    | TME                      |
| 5.77E-08    | TME                      |
| 0.000397947 | TME                      |

|             |                          |
|-------------|--------------------------|
| 0.195543847 | TME                      |
| 0.767861273 | Metabolism               |
| 0.075405596 | Metabolism               |
| 4.32E-09    | Metabolism               |
| 9.61E-11    | TME                      |
| 1.37E-10    | Metabolism               |
| 6.94E-12    | TME                      |
| 1.41E-11    | TME                      |
| 8.23E-07    | TME                      |
| 2.77E-05    | TME                      |
| 0.010164728 | TME                      |
| 0.000257223 | Metabolism               |
| 2.55E-28    | Proliferation/Metastasis |
| 0.155301544 | Metabolism               |
| 6.44E-09    | Proliferation/Metastasis |
| 9.30E-11    | Metabolism               |
| 0.043820591 | Metabolism               |
| 6.40E-08    | Metabolism               |
| 2.07E-06    | Metabolism               |
| 2.58E-08    | Metabolism               |
| 5.67E-08    | Metabolism               |
| 0.004504265 | Metabolism               |
| 0.824988307 | Metabolism               |
| 7.80E-11    | Metabolism               |
| 1.39E-08    | Metabolism               |
| 0.000357783 | Metabolism               |
| 0.360961561 | Metabolism               |
| 8.85E-12    | Metabolism               |
| 6.13E-15    | Metabolism               |
| 2.78E-08    | TME                      |
| 0.000164384 | Proliferation/Metastasis |
| 0.005152471 | Metabolism               |
| 0.025119771 | Proliferation/Metastasis |
| 6.62E-06    | TME                      |
| 1.43E-06    | Proliferation/Metastasis |
| 1.28E-08    | Proliferation/Metastasis |
| 0.001386008 | TME                      |
| 2.93E-07    | TME                      |
| 5.11E-10    | Metabolism               |
| 1.33E-09    | Metabolism               |
| 4.74E-12    | Proliferation/Metastasis |
| 2.48E-30    | Proliferation/Metastasis |
| 5.75E-10    | Proliferation/Metastasis |

|             |                          |
|-------------|--------------------------|
| 2.91E-14    | Metabolism               |
| 3.23E-05    | Metabolism               |
| 4.49E-14    | Metabolism               |
| 1.18E-12    | Proliferation/Metastasis |
| 4.10E-07    | TME                      |
| 1.16E-06    | TME                      |
| 0.00073935  | Metabolism               |
| 2.83E-14    | Proliferation/Metastasis |
| 1.46E-06    | Metabolism               |
| 2.22E-09    | TME                      |
| 5.00E-07    | TME                      |
| 8.18E-06    | TME                      |
| 1.72E-12    | TME                      |
| 0.031760433 | Metabolism               |
| 2.31E-07    | TME                      |
| 0.416975501 | Proliferation/Metastasis |
| 2.23E-11    | TME                      |
| 0.004991045 | Proliferation/Metastasis |
| 1.36E-26    | Proliferation/Metastasis |
| 4.45E-06    | Metabolism               |
| 2.32E-44    | Proliferation/Metastasis |
| 7.87E-11    | TME                      |
| 0.000954816 | Metabolism               |
| 1.07E-07    | TME                      |
| 7.10E-15    | TME                      |
| 2.21E-19    | TME                      |
| 3.10E-08    | TME                      |
| 0.133745751 | TME                      |
| 3.73E-10    | TME                      |
| 0.179634508 | Metabolism               |
| 9.54E-09    | TME                      |
| 0.359097304 | Metabolism               |
| 0.466986158 | Metabolism               |
| 6.54E-09    | Proliferation/Metastasis |
| 0.130045365 | Proliferation/Metastasis |
| 9.14E-23    | Metabolism               |
| 3.94E-11    | Metabolism               |
| 0.007632482 | Metabolism               |
| 4.41E-14    | Metabolism               |
| 0.003334604 | Proliferation/Metastasis |
| 0.699468041 | Proliferation/Metastasis |
| 0.002517524 | Metabolism               |
| 7.36E-06    | Metabolism               |

|             |                          |
|-------------|--------------------------|
| 2.60E-14    | Metabolism               |
| 2.04E-10    | TME                      |
| 0.030034614 | Metabolism               |
| 2.77E-05    | Metabolism               |
| 1.59E-06    | Metabolism               |
| 0.195750448 | Metabolism               |
| 0.027103492 | Proliferation/Metastasis |
| 1.88E-12    | Metabolism               |
| 2.41E-07    | Metabolism               |
| 2.09E-07    | Metabolism               |
| 6.91E-32    | Metabolism               |
| 5.88E-37    | Metabolism               |
| 8.03E-22    | Metabolism               |
| 6.37E-05    | Proliferation/Metastasis |
| 0.445138888 | Metabolism               |
| 3.92E-06    | Metabolism               |
| 1.15E-07    | Proliferation/Metastasis |
| 3.33E-07    | Metabolism               |
| 0.4688039   | Metabolism               |
| 0.000378566 | Metabolism               |
| 0.052128836 | Metabolism               |
| 1.22E-07    | Metabolism               |
| 0.350590089 | Metabolism               |
| 0.334058207 | Metabolism               |
| 0.533903773 | Metabolism               |
| 3.79E-10    | TME                      |
| 1.49E-08    | TME                      |
| 5.21E-08    | TME                      |
| 5.56E-11    | TME                      |
| 7.50E-09    | TME                      |
| 5.12E-05    | Metabolism               |
| 1.14E-07    | Metabolism               |
| 1.92E-05    | Proliferation/Metastasis |
| 0.094974773 | Metabolism               |
| 1.46E-07    | Proliferation/Metastasis |
| 0.05085794  | Metabolism               |
| 0.188465365 | TME                      |
| 0.398088613 | Metabolism               |
| 1.62E-09    | Metabolism               |
| 0.155872116 | Metabolism               |
| 5.44E-07    | Metabolism               |
| 5.32E-11    | TME                      |
| 1.06E-06    | TME                      |

|             |                          |
|-------------|--------------------------|
| 1.92E-16    | Proliferation/Metastasis |
| 8.25E-12    | Metabolism               |
| 9.47E-08    | Proliferation/Metastasis |
| 0.272663658 | Proliferation/Metastasis |
| 0.000367189 | TME                      |
| 0.000422565 | TME                      |
| 1.76E-05    | TME                      |
| 6.27E-05    | TME                      |
| 0.088197518 | Metabolism               |
| 0.000174246 | Proliferation/Metastasis |
| 0.111371704 | Metabolism               |
| 0.000319314 | Metabolism               |
| 5.67E-06    | Proliferation/Metastasis |
| 4.30E-06    | Proliferation/Metastasis |
| 3.21E-05    | Metabolism               |
| 1.70E-05    | Metabolism               |
| 0.229141418 | Metabolism               |
| 1.99E-05    | Metabolism               |
| 0.071145235 | TME                      |
| 9.91E-10    | TME                      |
| 7.57E-05    | TME                      |
| 0.001062205 | TME                      |
| 0.068784872 | TME                      |
| 4.81E-05    | Metabolism               |
| 8.03E-07    | Metabolism               |
| 0.768867141 | Metabolism               |
| 0.776031508 | Metabolism               |
| 0.002692986 | Metabolism               |
| 1.31E-13    | TME                      |
| 2.81E-06    | TME                      |
| 1.64E-05    | TME                      |
| 0.00010917  | TME                      |
| 9.43E-07    | TME                      |
| 1.95E-05    | TME                      |
| 7.08E-06    | TME                      |
| 0.002292224 | TME                      |
| 0.000155019 | TME                      |
| 0.210635827 | Proliferation/Metastasis |
| 0.009276037 | Proliferation/Metastasis |
| 0.239617531 | Metabolism               |
| 0.071901608 | Metabolism               |
| 0.000352676 | TME                      |
| 0.04104748  | Metabolism               |

|             |                          |
|-------------|--------------------------|
| 0.00030041  | Metabolism               |
| 8.70E-06    | TME                      |
| 0.01087457  | Proliferation/Metastasis |
| 0.75169825  | Proliferation/Metastasis |
| 0.104807289 | TME                      |
| 6.32E-05    | Metabolism               |
| 0.07997734  | Metabolism               |
| 0.952054515 | Proliferation/Metastasis |
| 3.03E-05    | Proliferation/Metastasis |
| 3.38E-05    | TME                      |
| 0.000134263 | TME                      |
| 6.74E-06    | TME                      |
| 1.17E-06    | TME                      |
| 7.57E-08    | Proliferation/Metastasis |
| 9.20E-13    | TME                      |
| 1.09E-05    | TME                      |
| 0.000229109 | Metabolism               |
| 3.98E-07    | TME                      |
| 7.16E-06    | TME                      |
| 0.000861999 | TME                      |
| 0.263516094 | TME                      |
| 0.015855392 | Metabolism               |
| 0.002521349 | Metabolism               |
| 0.241881032 | Metabolism               |
| 8.37E-08    | TME                      |
| 0.226959157 | Metabolism               |
| 0.000729514 | TME                      |
| 0.000748381 | TME                      |
| 4.33E-06    | TME                      |
| 0.82096944  | TME                      |
| 6.20E-05    | TME                      |
| 0.313433768 | Metabolism               |
| 0.433870188 | Proliferation/Metastasis |
| 0.002320355 | Metabolism               |
| 6.24E-10    | Proliferation/Metastasis |
| 0.000277009 | Metabolism               |
| 0.093893338 | Metabolism               |
| 0.905327034 | Metabolism               |
| 0.077629129 | Metabolism               |
| 0.000214422 | Metabolism               |
| 0.132474644 | Metabolism               |
| 0.004738164 | Metabolism               |
| 9.64E-06    | Metabolism               |

|             |                          |
|-------------|--------------------------|
| 2.57E-06    | Metabolism               |
| 2.26E-06    | Metabolism               |
| 1.09E-07    | Metabolism               |
| 1.28E-08    | Metabolism               |
| 0.303480314 | Metabolism               |
| 0.716105111 | Metabolism               |
| 8.91E-06    | TME                      |
| 4.13E-06    | Proliferation/Metastasis |
| 0.000888005 | Metabolism               |
| 3.27E-05    | Proliferation/Metastasis |
| 1.76E-06    | TME                      |
| 6.04E-12    | Proliferation/Metastasis |
| 3.59E-08    | Proliferation/Metastasis |
| 2.26E-09    | TME                      |
| 0.00040965  | TME                      |
| 2.88E-07    | Metabolism               |
| 2.35E-10    | Metabolism               |
| 1.48E-09    | Proliferation/Metastasis |
| 0.324914653 | Proliferation/Metastasis |
| 3.89E-11    | Proliferation/Metastasis |
| 0.663597981 | Metabolism               |
| 0.866746379 | Metabolism               |
| 0.110436343 | Metabolism               |
| 2.28E-07    | Proliferation/Metastasis |
| 3.76E-09    | TME                      |
| 1.08E-07    | TME                      |
| 0.016423039 | Metabolism               |
| 1.67E-09    | Proliferation/Metastasis |
| 8.90E-10    | Metabolism               |
| 6.83E-06    | TME                      |
| 8.57E-08    | TME                      |
| 4.45E-06    | TME                      |
| 2.67E-06    | TME                      |
| 0.000209177 | Metabolism               |
| 1.22E-05    | TME                      |
| 0.249367647 | Proliferation/Metastasis |
| 5.52E-05    | TME                      |
| 7.02E-06    | Proliferation/Metastasis |
| 1.09E-07    | Proliferation/Metastasis |
| 8.62E-12    | Metabolism               |
| 0.550428153 | Proliferation/Metastasis |
| 6.89E-07    | TME                      |
| 1.79E-06    | Metabolism               |



|             |                          |
|-------------|--------------------------|
| 0.047317116 | TME                      |
| 1.58E-09    | TME                      |
| 0.002788277 | TME                      |
| 1.53E-05    | TME                      |
| 0.90520532  | TME                      |
| 1.41E-07    | TME                      |
| 0.00667841  | Metabolism               |
| 6.71E-05    | TME                      |
| 5.47E-06    | Metabolism               |
| 2.22E-06    | Metabolism               |
| 2.78E-05    | Proliferation/Metastasis |
| 0.001242971 | Proliferation/Metastasis |
| 0.821436795 | Metabolism               |
| 0.672771344 | Metabolism               |
| 0.049569599 | Metabolism               |
| 0.13712788  | Metabolism               |
| 0.000122453 | Proliferation/Metastasis |
| 1.72E-06    | Proliferation/Metastasis |
| 0.338801374 | Metabolism               |
| 0.000124094 | Metabolism               |
| 0.000536097 | Metabolism               |
| 9.72E-05    | TME                      |
| 0.019945602 | Metabolism               |
| 0.499136999 | Metabolism               |
| 0.015547688 | Metabolism               |
| 6.07E-12    | Metabolism               |
| 8.64E-14    | Proliferation/Metastasis |
| 0.000116583 | Metabolism               |
| 0.098793245 | Metabolism               |
| 0.001849184 | Metabolism               |
| 0.218900104 | Metabolism               |
| 0.177457279 | Metabolism               |
| 0.288020696 | Metabolism               |
| 0.655860752 | Proliferation/Metastasis |
| 0.000242046 | Metabolism               |
| 0.000408778 | Metabolism               |
| 2.63E-16    | Proliferation/Metastasis |
| 0.010652294 | Metabolism               |
| 0.003655029 | Metabolism               |
| 1.73E-14    | Metabolism               |
| 2.47E-07    | Metabolism               |
| 0.456317155 | Metabolism               |
| 0.000871365 | Metabolism               |

|             |                          |
|-------------|--------------------------|
| 0.003382742 | Metabolism               |
| 0.19121374  | Metabolism               |
| 1.08E-06    | TME                      |
| 6.17E-05    | TME                      |
| 6.25E-06    | TME                      |
| 1.50E-05    | TME                      |
| 0.0014364   | TME                      |
| 0.006735461 | Metabolism               |
| 0.252117574 | Metabolism               |
| 1.88E-14    | Proliferation/Metastasis |
| 0.656784956 | Metabolism               |
| 0.000197657 | Proliferation/Metastasis |
| 1.90E-05    | Metabolism               |
| 0.30255867  | TME                      |
| 0.000920454 | Metabolism               |
| 0.137315453 | Metabolism               |
| 0.046114074 | Metabolism               |
| 0.19578751  | Metabolism               |
| 3.07E-05    | TME                      |
| 6.27E-06    | TME                      |
| 0.001590159 | Proliferation/Metastasis |
| 0.002808321 | Metabolism               |
| 0.003595096 | Proliferation/Metastasis |
| 0.924876876 | Proliferation/Metastasis |
| 1.63E-06    | TME                      |
| 0.414543412 | TME                      |
| 0.176527613 | TME                      |
| 0.69946643  | TME                      |
| 0.005511255 | Metabolism               |
| 4.33E-06    | Proliferation/Metastasis |
| 0.015756451 | Metabolism               |
| 5.38E-27    | Metabolism               |
| 1.05E-06    | Proliferation/Metastasis |
| 4.53E-13    | Proliferation/Metastasis |
| 1.79E-08    | Metabolism               |
| 1.64E-08    | Metabolism               |
| 1.37E-08    | Metabolism               |
| 0.410741048 | Metabolism               |
| 0.584781188 | TME                      |
| 0.066864563 | TME                      |
| 0.662634501 | TME                      |
| 0.026822006 | TME                      |
| 6.14E-15    | TME                      |

|             |                          |
|-------------|--------------------------|
| 0.022605296 | Metabolism               |
| 9.53E-06    | Metabolism               |
| 0.284515925 | Metabolism               |
| 0.130100716 | Metabolism               |
| 3.55E-06    | Metabolism               |
| 0.011474293 | TME                      |
| 0.03330142  | TME                      |
| 0.005319872 | TME                      |
| 0.306286724 | TME                      |
| 0.245237928 | TME                      |
| 0.679709058 | TME                      |
| 0.530975585 | TME                      |
| 0.590618023 | TME                      |
| 0.993066996 | TME                      |
| 0.036719848 | Proliferation/Metastasis |
| 5.10E-07    | Proliferation/Metastasis |
| 2.92E-06    | Metabolism               |
| 0.072377875 | Metabolism               |
| 0.010645225 | TME                      |
| 0.173828868 | Metabolism               |
| 0.014859441 | Metabolism               |
| 4.87E-05    | TME                      |
| 0.014302726 | Proliferation/Metastasis |
| 0.230410598 | Proliferation/Metastasis |
| 0.648265423 | TME                      |
| 0.221091762 | Metabolism               |
| 1.70E-10    | Metabolism               |
| 0.012405378 | Proliferation/Metastasis |
| 0.000726343 | Proliferation/Metastasis |
| 0.762330137 | TME                      |
| 1.27E-05    | TME                      |
| 0.73917074  | TME                      |
| 0.255256191 | TME                      |
| 0.003697156 | Proliferation/Metastasis |
| 0.414170612 | TME                      |
| 0.000172663 | TME                      |
| 0.005741362 | Metabolism               |
| 0.004803566 | TME                      |
| 0.009022493 | TME                      |
| 0.849825381 | TME                      |
| 0.184892986 | TME                      |
| 0.903127841 | Metabolism               |
| 0.543172846 | Metabolism               |

|             |                          |
|-------------|--------------------------|
| 1.54E-06    | Metabolism               |
| 0.000186522 | TME                      |
| 5.01E-09    | Metabolism               |
| 0.56507913  | TME                      |
| 0.618231776 | TME                      |
| 0.035009911 | TME                      |
| 0.80984816  | TME                      |
| 0.860450844 | TME                      |
| 7.96E-15    | Metabolism               |
| 0.000734445 | Proliferation/Metastasis |
| 1.34E-20    | Metabolism               |
| 0.025225168 | Proliferation/Metastasis |
| 1.63E-07    | Metabolism               |
| 0.001760325 | Metabolism               |
| 0.000671389 | Metabolism               |
| 5.08E-06    | Metabolism               |
| 2.00E-09    | Metabolism               |
| 7.19E-07    | Metabolism               |
| 0.427120541 | Metabolism               |
| 0.000644366 | Metabolism               |
| 1.18E-07    | Metabolism               |
| 1.56E-06    | Metabolism               |
| 1.81E-08    | Metabolism               |
| 1.37E-05    | Metabolism               |
| 0.404991086 | Metabolism               |
| 0.355060583 | Metabolism               |
| 0.000279837 | TME                      |
| 0.014538218 | Proliferation/Metastasis |
| 0.115473659 | Metabolism               |
| 3.28E-21    | Proliferation/Metastasis |
| 0.076062857 | TME                      |
| 2.74E-11    | Proliferation/Metastasis |
| 3.03E-11    | Proliferation/Metastasis |
| 4.64E-05    | TME                      |
| 9.70E-12    | TME                      |
| 0.000135724 | Metabolism               |
| 0.761173857 | Metabolism               |
| 0.589019561 | Proliferation/Metastasis |
| 0.778881842 | Proliferation/Metastasis |
| 3.27E-09    | Proliferation/Metastasis |
| 0.655396162 | Metabolism               |
| 0.101585772 | Metabolism               |
| 2.11E-10    | Metabolism               |

|             |                          |
|-------------|--------------------------|
| 9.18E-10    | Proliferation/Metastasis |
| 6.38E-06    | TME                      |
| 9.36E-08    | TME                      |
| 0.002453255 | Metabolism               |
| 3.69E-05    | Proliferation/Metastasis |
| 0.02750181  | Metabolism               |
| 0.386046177 | TME                      |
| 0.893031609 | TME                      |
| 1.82E-06    | TME                      |
| 0.056443497 | TME                      |
| 0.021091418 | Metabolism               |
| 5.63E-11    | TME                      |
| 0.000141138 | Proliferation/Metastasis |
| 1.07E-13    | TME                      |
| 0.204109758 | Proliferation/Metastasis |
| 6.15E-13    | Proliferation/Metastasis |
| 7.65E-09    | Metabolism               |
| 0.023362488 | Proliferation/Metastasis |
| 0.069208216 | TME                      |
| 5.80E-05    | Metabolism               |
| 0.199742857 | TME                      |
| 0.74305402  | TME                      |
| 0.000276318 | TME                      |
| 0.164283514 | TME                      |
| 0.110063994 | TME                      |
| 0.306945732 | TME                      |
| 4.80E-11    | Metabolism               |
| 6.27E-19    | TME                      |
| 3.64E-06    | Metabolism               |
| 0.006623934 | Metabolism               |
| 9.14E-15    | Proliferation/Metastasis |
| 0.00178198  | Proliferation/Metastasis |
| 0.117652445 | Metabolism               |
| 0.023333401 | Metabolism               |
| 0.598652578 | Metabolism               |
| 9.91E-09    | Metabolism               |
| 6.74E-31    | Proliferation/Metastasis |
| 0.000196694 | Proliferation/Metastasis |
| 0.110790769 | Metabolism               |
| 0.149776574 | Metabolism               |
| 6.02E-12    | Metabolism               |
| 0.002998307 | TME                      |
| 4.28E-08    | Metabolism               |

|             |                          |
|-------------|--------------------------|
| 0.858561833 | Metabolism               |
| 0.023176937 | Metabolism               |
| 0.500609346 | Metabolism               |
| 2.97E-10    | Proliferation/Metastasis |
| 0.001114684 | Metabolism               |
| 0.008025671 | Metabolism               |
| 0.023036135 | Metabolism               |
| 3.25E-06    | Metabolism               |
| 5.02E-06    | Metabolism               |
| 0.881027574 | Metabolism               |
| 0.860526    | Proliferation/Metastasis |
| 0.010219321 | Metabolism               |
| 2.69E-06    | Metabolism               |
| 0.007885685 | Proliferation/Metastasis |
| 5.19E-11    | Metabolism               |
| 0.558694571 | Metabolism               |
| 2.04E-05    | Metabolism               |
| 3.38E-10    | Metabolism               |
| 3.02E-07    | Metabolism               |
| 0.000904308 | Metabolism               |
| 0.002394355 | Metabolism               |
| 0.024933751 | Metabolism               |
| 0.028299636 | TME                      |
| 0.000236731 | TME                      |
| 2.15E-10    | TME                      |
| 0.0111144   | TME                      |
| 0.906961786 | TME                      |
| 1.39E-06    | Metabolism               |
| 4.73E-06    | Metabolism               |
| 0.112557516 | Proliferation/Metastasis |
| 1.11E-05    | Metabolism               |
| 1.99E-21    | Proliferation/Metastasis |
| 0.257744643 | Metabolism               |
| 5.11E-16    | TME                      |
| 1.83E-05    | Metabolism               |
| 0.001938237 | Metabolism               |
| 2.28E-10    | Metabolism               |
| 0.171456441 | Metabolism               |
| 0.086003741 | TME                      |
| 0.814888252 | TME                      |
| 4.64E-05    | Proliferation/Metastasis |
| 0.053515806 | Metabolism               |
| 0.309934938 | Proliferation/Metastasis |

|             |                          |
|-------------|--------------------------|
| 4.44E-05    | Proliferation/Metastasis |
| 0.573966888 | TME                      |
| 0.443113062 | TME                      |
| 0.231213983 | TME                      |
| 0.125782615 | TME                      |
| 0.0013457   | Metabolism               |
| 3.29E-08    | Proliferation/Metastasis |
| 0.291333025 | Metabolism               |
| 0.041717896 | Metabolism               |
| 0.021612952 | Proliferation/Metastasis |
| 0.108595285 | Proliferation/Metastasis |
| 0.975157305 | Metabolism               |
| 0.004381028 | Metabolism               |
| 0.000222626 | Metabolism               |
| 0.409436547 | Metabolism               |
| 0.990387613 | TME                      |
| 0.56901138  | TME                      |
| 0.995886273 | TME                      |
| 0.08950231  | TME                      |
| 0.672079    | TME                      |
| 0.784529793 | Metabolism               |
| 0.008520855 | Metabolism               |
| 0.910357667 | Metabolism               |
| 0.685170622 | Metabolism               |
| 0.39583237  | Metabolism               |
| 0.824648489 | TME                      |
| 0.381991214 | TME                      |
| 0.380178388 | TME                      |
| 0.495444118 | TME                      |
| 0.275066399 | TME                      |
| 0.220941161 | TME                      |
| 0.177576603 | TME                      |
| 0.043516816 | TME                      |
| 0.0796879   | TME                      |
| 4.63E-07    | Proliferation/Metastasis |
| 0.000225002 | Proliferation/Metastasis |
| 0.002652624 | Metabolism               |
| 2.81E-05    | Metabolism               |
| 0.988223559 | TME                      |
| 0.488006681 | Metabolism               |
| 0.000122707 | Metabolism               |
| 0.432206449 | TME                      |
| 0.001401955 | Proliferation/Metastasis |

|             |                          |
|-------------|--------------------------|
| 3.28E-07    | Proliferation/Metastasis |
| 0.936371268 | TME                      |
| 0.179626087 | Metabolism               |
| 0.18058991  | Metabolism               |
| 1.39E-08    | Proliferation/Metastasis |
| 0.575836856 | Proliferation/Metastasis |
| 0.261731692 | TME                      |
| 0.672907014 | TME                      |
| 0.421656141 | TME                      |
| 0.503732726 | TME                      |
| 5.66E-08    | Proliferation/Metastasis |
| 0.938602283 | TME                      |
| 0.294957073 | TME                      |
| 0.330638963 | Metabolism               |
| 0.265965479 | TME                      |
| 0.209107622 | TME                      |
| 0.063970909 | TME                      |
| 0.812178639 | TME                      |
| 0.582739628 | Metabolism               |
| 0.387929827 | Metabolism               |
| 0.021956111 | Metabolism               |
| 0.689035895 | TME                      |
| 0.01593713  | Metabolism               |
| 0.706063269 | TME                      |
| 0.212133665 | TME                      |
| 0.378238952 | TME                      |
| 0.004831753 | TME                      |
| 0.138858462 | TME                      |
| 0.019398953 | Metabolism               |
| 3.25E-09    | Proliferation/Metastasis |
| 0.000206014 | Metabolism               |
| 0.666595111 | Proliferation/Metastasis |
| 0.010092183 | Metabolism               |
| 0.656771693 | Metabolism               |
| 0.296370645 | Metabolism               |
| 0.095322067 | Metabolism               |
| 0.00232306  | Metabolism               |
| 0.12833541  | Metabolism               |
| 0.048075504 | Metabolism               |
| 0.721802608 | Metabolism               |
| 0.156653945 | Metabolism               |
| 0.976536035 | Metabolism               |
| 0.47276992  | Metabolism               |



|             |                          |
|-------------|--------------------------|
| 0.99950832  | Metabolism               |
| 0.330988191 | Metabolism               |
| 0.005172764 | Metabolism               |
| 0.497917814 | TME                      |
| 0.597219054 | Proliferation/Metastasis |
| 0.975724437 | Metabolism               |
| 0.734809694 | Proliferation/Metastasis |
| 0.116230178 | TME                      |
| 0.091549897 | Proliferation/Metastasis |
| 0.066496289 | Proliferation/Metastasis |
| 0.213919628 | TME                      |
| 0.448667418 | TME                      |
| 0.561808704 | Metabolism               |
| 0.012593427 | Metabolism               |
| 0.00568277  | Proliferation/Metastasis |
| 1.06E-07    | Proliferation/Metastasis |
| 0.948530571 | Proliferation/Metastasis |
| 0.011523079 | Metabolism               |
| 0.024490025 | Metabolism               |
| 0.010461984 | Metabolism               |
| 0.941663001 | Proliferation/Metastasis |
| 0.451920217 | TME                      |
| 0.402727629 | TME                      |
| 0.393336688 | Metabolism               |
| 0.577225715 | Proliferation/Metastasis |
| 0.00221325  | Metabolism               |
| 0.342149033 | TME                      |
| 0.822990169 | TME                      |
| 0.383449638 | TME                      |
| 0.679093795 | TME                      |
| 0.396171657 | Metabolism               |
| 0.001142935 | TME                      |
| 1.35E-05    | Proliferation/Metastasis |
| 0.427825438 | TME                      |
| 0.37357305  | Proliferation/Metastasis |
| 1.73E-06    | Proliferation/Metastasis |
| 0.653868699 | Metabolism               |
| 9.31E-08    | Proliferation/Metastasis |
| 0.585951336 | TME                      |
| 0.260356692 | Metabolism               |
| 0.857065404 | TME                      |
| 0.751298909 | TME                      |
| 0.622273895 | TME                      |

|             |                          |
|-------------|--------------------------|
| 0.425906587 | TME                      |
| 0.002147468 | TME                      |
| 0.445611698 | TME                      |
| 0.027474796 | Metabolism               |
| 0.785511487 | TME                      |
| 0.164994299 | Metabolism               |
| 0.228795656 | Metabolism               |
| 0.285035214 | Proliferation/Metastasis |
| 0.530899991 | Proliferation/Metastasis |
| 1.94E-06    | Metabolism               |
| 0.812296538 | Metabolism               |
| 0.070544393 | Metabolism               |
| 0.25996899  | Metabolism               |
| 0.06598792  | Proliferation/Metastasis |
| 0.390485    | Proliferation/Metastasis |
| 0.023668141 | Metabolism               |
| 0.343553238 | Metabolism               |
| 2.30E-06    | Metabolism               |
| 0.105767359 | TME                      |
| 0.004559282 | Metabolism               |
| 0.092746229 | Metabolism               |
| 0.771142461 | Metabolism               |
| 0.925103827 | Metabolism               |
| 0.001132216 | Proliferation/Metastasis |
| 0.346832963 | Metabolism               |
| 0.001975359 | Metabolism               |
| 0.49888897  | Metabolism               |
| 2.40E-06    | Metabolism               |
| 6.34E-06    | Metabolism               |
| 0.021481544 | Metabolism               |
| 0.802667956 | Proliferation/Metastasis |
| 0.187333081 | Metabolism               |
| 0.055854495 | Metabolism               |
| 0.261748432 | Proliferation/Metastasis |
| 0.148109433 | Metabolism               |
| 0.030786937 | Metabolism               |
| 0.377181953 | Metabolism               |
| 0.978102467 | Metabolism               |
| 0.000646625 | Metabolism               |
| 0.125868112 | Metabolism               |
| 0.25559574  | Metabolism               |
| 0.695198796 | Metabolism               |
| 0.312753894 | TME                      |

|             |                          |
|-------------|--------------------------|
| 0.129556801 | TME                      |
| 0.382508659 | TME                      |
| 0.642527052 | TME                      |
| 0.427661756 | TME                      |
| 0.011071032 | Metabolism               |
| 0.689998402 | Metabolism               |
| 0.837868037 | Proliferation/Metastasis |
| 0.206166464 | Metabolism               |
| 0.089183827 | Proliferation/Metastasis |
| 0.42314629  | Metabolism               |
| 0.107851957 | TME                      |
| 0.609626216 | Metabolism               |
| 0.418611044 | Metabolism               |
| 0.023385849 | Metabolism               |
| 0.856531031 | Metabolism               |
| 0.995093973 | TME                      |
| 0.257130007 | TME                      |
| 0.508919504 | Proliferation/Metastasis |
| 0.003579413 | Metabolism               |
| 0.271809526 | Proliferation/Metastasis |
| 0.674289688 | Proliferation/Metastasis |
| 0.001242707 | TME                      |
| 0.119203576 | TME                      |
| 0.149535385 | TME                      |
| 0.03498513  | TME                      |
| 0.004236169 | Metabolism               |
| 0.59723958  | Proliferation/Metastasis |
| 0.254870741 | Metabolism               |
| 0.529174821 | Metabolism               |
| 0.884385363 | Proliferation/Metastasis |
| 4.46E-05    | Proliferation/Metastasis |
| 0.275158692 | Metabolism               |
| 0.267105826 | Metabolism               |
| 0.065869326 | Metabolism               |
| 0.008310464 | Metabolism               |
| 0.311182822 | TME                      |
| 0.012682458 | TME                      |
| 0.021423369 | TME                      |
| 0.111259498 | TME                      |
| 0.454622125 | TME                      |
| 4.31E-05    | Metabolism               |
| 0.02691479  | Metabolism               |
| 0.131670115 | Metabolism               |

|             |                          |
|-------------|--------------------------|
| 0.442574588 | Metabolism               |
| 0.256954906 | Metabolism               |
| 0.006128408 | TME                      |
| 9.03E-05    | TME                      |
| 0.040042415 | TME                      |
| 0.056806063 | TME                      |
| 0.007060197 | TME                      |
| 0.093331149 | TME                      |
| 0.0440211   | TME                      |
| 0.129531466 | TME                      |
| 0.346031215 | TME                      |
| 0.003836461 | Proliferation/Metastasis |
| 0.069988184 | Proliferation/Metastasis |
| 0.164066435 | Metabolism               |
| 0.104408809 | Metabolism               |
| 0.012059821 | TME                      |
| 0.966008666 | Metabolism               |
| 0.037989717 | Metabolism               |
| 0.002046057 | TME                      |
| 0.169852744 | Proliferation/Metastasis |
| 0.025521873 | Proliferation/Metastasis |
| 0.12204077  | TME                      |
| 0.038036252 | Metabolism               |
| 0.193712868 | Metabolism               |
| 0.005349461 | Proliferation/Metastasis |
| 7.17E-05    | Proliferation/Metastasis |
| 0.139903038 | TME                      |
| 0.043557249 | TME                      |
| 0.115777917 | TME                      |
| 0.003118318 | TME                      |
| 0.567434563 | Proliferation/Metastasis |
| 1.47E-08    | TME                      |
| 0.066015376 | TME                      |
| 0.211629183 | Metabolism               |
| 0.01281998  | TME                      |
| 0.04072857  | TME                      |
| 0.478478493 | TME                      |
| 0.805304855 | TME                      |
| 0.003546322 | Metabolism               |
| 0.030462825 | Metabolism               |
| 0.327600988 | Metabolism               |
| 3.62E-06    | TME                      |
| 0.593509278 | Metabolism               |

|             |                          |
|-------------|--------------------------|
| 0.07766833  | TME                      |
| 0.036818101 | TME                      |
| 0.052656234 | TME                      |
| 0.476448266 | TME                      |
| 0.07071686  | TME                      |
| 0.325967324 | Metabolism               |
| 0.00922078  | Proliferation/Metastasis |
| 0.547108642 | Metabolism               |
| 0.166796215 | Proliferation/Metastasis |
| 0.024048889 | Metabolism               |
| 0.043066126 | Metabolism               |
| 0.649017096 | Metabolism               |
| 0.016836217 | Metabolism               |
| 0.004043773 | Metabolism               |
| 2.31E-07    | Metabolism               |
| 0.001375822 | Metabolism               |
| 0.024612559 | Metabolism               |
| 0.001475725 | Metabolism               |
| 0.023315321 | Metabolism               |
| 0.010395793 | Metabolism               |
| 0.863946514 | Metabolism               |
| 0.352939701 | Metabolism               |
| 0.511156286 | Metabolism               |
| 0.018736529 | TME                      |
| 0.003940336 | Proliferation/Metastasis |
| 1.57E-05    | Metabolism               |
| 0.158391906 | Proliferation/Metastasis |
| 0.056020905 | TME                      |
| 0.000327418 | Proliferation/Metastasis |
| 0.38928517  | Proliferation/Metastasis |
| 0.029954215 | TME                      |
| 0.018286347 | TME                      |
| 0.016655871 | Metabolism               |
| 0.218465854 | Metabolism               |
| 0.008619243 | Proliferation/Metastasis |
| 0.769023937 | Proliferation/Metastasis |
| 0.001046016 | Proliferation/Metastasis |
| 0.007533043 | Metabolism               |
| 0.296675203 | Metabolism               |
| 0.491839254 | Metabolism               |
| 0.171393891 | Proliferation/Metastasis |
| 0.074941134 | TME                      |
| 0.001203688 | TME                      |

|             |                          |
|-------------|--------------------------|
| 0.205890243 | Metabolism               |
| 0.059053048 | Proliferation/Metastasis |
| 0.728465024 | Metabolism               |
| 0.185773444 | TME                      |
| 0.238580744 | TME                      |
| 1.80E-08    | TME                      |
| 1.31E-05    | TME                      |
| 0.054856875 | Metabolism               |
| 0.354101588 | TME                      |
| 0.271739324 | Proliferation/Metastasis |
| 0.072773628 | TME                      |
| 0.037731222 | Proliferation/Metastasis |
| 0.256016294 | Proliferation/Metastasis |
| 0.123966599 | Metabolism               |
| 0.237042835 | Proliferation/Metastasis |
| 0.06185337  | TME                      |
| 0.910167223 | Metabolism               |
| 0.113295003 | TME                      |
| 0.021132405 | TME                      |
| 0.141007076 | TME                      |
| 0.188180633 | TME                      |
| 0.141166823 | TME                      |
| 0.007158931 | TME                      |
| 0.13630609  | Metabolism               |
| 0.05922476  | TME                      |
| 0.549385019 | Metabolism               |
| 0.746059516 | Metabolism               |
| 0.725383257 | Proliferation/Metastasis |
| 0.002629594 | Proliferation/Metastasis |
| 0.365894422 | Metabolism               |
| 0.272004984 | Metabolism               |
| 0.320685853 | Metabolism               |
| 0.50791471  | Metabolism               |
| 0.939571758 | Proliferation/Metastasis |
| 0.327760247 | Proliferation/Metastasis |
| 0.289888941 | Metabolism               |
| 0.78092824  | Metabolism               |
| 0.99576769  | Metabolism               |
| 7.65E-10    | TME                      |
| 0.037384854 | Metabolism               |
| 0.057352998 | Metabolism               |
| 0.599280091 | Metabolism               |
| 0.620393401 | Metabolism               |

|             |                          |
|-------------|--------------------------|
| 0.983321228 | Proliferation/Metastasis |
| 0.573629593 | Metabolism               |
| 0.121080029 | Metabolism               |
| 0.006210894 | Metabolism               |
| 0.005824017 | Metabolism               |
| 0.083196101 | Metabolism               |
| 0.114435372 | Metabolism               |
| 0.56545897  | Proliferation/Metastasis |
| 0.001581047 | Metabolism               |
| 0.829999699 | Metabolism               |
| 0.665636798 | Proliferation/Metastasis |
| 0.738749791 | Metabolism               |
| 0.107468037 | Metabolism               |
| 0.796697185 | Metabolism               |
| 0.084150386 | Metabolism               |
| 0.847623347 | Metabolism               |
| 0.021810939 | Metabolism               |
| 0.324320408 | Metabolism               |
| 0.126885971 | Metabolism               |
| 0.031595896 | TME                      |
| 0.513061262 | TME                      |
| 0.108560851 | TME                      |
| 0.068449859 | TME                      |
| 0.052986278 | TME                      |
| 0.244165125 | Metabolism               |
| 0.188125415 | Metabolism               |
| 0.081181057 | Proliferation/Metastasis |
| 0.82432164  | Metabolism               |
| 0.397943508 | Proliferation/Metastasis |
| 0.801126665 | Metabolism               |
| 0.110815756 | TME                      |
| 0.0406547   | Metabolism               |
| 0.318361892 | Metabolism               |
| 0.643807277 | Metabolism               |
| 0.004945027 | Metabolism               |
| 5.45E-09    | TME                      |
| 1.11E-06    | TME                      |
| 0.02438297  | Proliferation/Metastasis |
| 0.11575992  | Metabolism               |
| 0.01806259  | Proliferation/Metastasis |
| 0.000405568 | Proliferation/Metastasis |
| 0.32873615  | TME                      |
| 0.087662705 | TME                      |

|             |                          |
|-------------|--------------------------|
| 0.006907234 | TME                      |
| 0.038011627 | TME                      |
| 0.235539167 | Metabolism               |
| 0.798237821 | Proliferation/Metastasis |
| 0.44229236  | Metabolism               |
| 0.190441919 | Metabolism               |
| 0.670842532 | Proliferation/Metastasis |
| 0.001991002 | Proliferation/Metastasis |
| 0.010087642 | Metabolism               |
| 0.344925429 | Metabolism               |
| 0.077749191 | Metabolism               |
| 0.200477417 | Metabolism               |
| 0.010895281 | TME                      |
| 0.157703385 | TME                      |
| 0.001579182 | TME                      |
| 0.096598745 | TME                      |
| 0.994401467 | TME                      |
| 0.465254841 | Metabolism               |
| 0.039033943 | Metabolism               |
| 0.033508779 | Metabolism               |
| 0.006803132 | Metabolism               |
| 0.949540417 | Metabolism               |
| 2.61E-05    | TME                      |
| 0.000889054 | TME                      |
| 0.052405841 | TME                      |
| 0.007825707 | TME                      |
| 0.060202363 | TME                      |
| 0.027570798 | TME                      |
| 0.028810275 | TME                      |
| 0.040390286 | TME                      |
| 0.009892093 | TME                      |
| 0.223503245 | Proliferation/Metastasis |
| 0.112303856 | Proliferation/Metastasis |
| 0.91010558  | Metabolism               |
| 0.572265185 | Metabolism               |
| 0.055838756 | TME                      |
| 0.113072837 | Metabolism               |
| 0.000828189 | Metabolism               |
| 0.000337211 | TME                      |
| 0.003180358 | Proliferation/Metastasis |
| 0.189581569 | Proliferation/Metastasis |
| 0.089682005 | TME                      |
| 0.329934198 | Metabolism               |



|             |                          |
|-------------|--------------------------|
| 0.006512354 | Metabolism               |
| 0.530076465 | Proliferation/Metastasis |
| 0.001693725 | Proliferation/Metastasis |
| 0.001541303 | TME                      |
| 0.006773385 | TME                      |
| 0.001686897 | TME                      |
| 0.007578613 | TME                      |
| 4.51E-06    | Proliferation/Metastasis |
| 3.39E-05    | TME                      |
| 0.024999237 | TME                      |
| 0.330829302 | Metabolism               |
| 0.001616886 | TME                      |
| 0.003702514 | TME                      |
| 0.197698218 | TME                      |
| 0.640034255 | TME                      |
| 0.957463788 | Metabolism               |
| 0.721984134 | Metabolism               |
| 0.475020125 | Metabolism               |
| 0.000558411 | TME                      |
| 0.015848602 | Metabolism               |
| 0.00364492  | TME                      |
| 0.134111895 | TME                      |
| 0.002475313 | TME                      |
| 0.630581578 | TME                      |
| 0.035553317 | TME                      |
| 0.168044373 | Metabolism               |
| 0.13197071  | Proliferation/Metastasis |
| 0.996525725 | Metabolism               |
| 0.123208832 | Proliferation/Metastasis |
| 0.843020306 | Metabolism               |
| 0.964893201 | Metabolism               |
| 0.859591039 | Metabolism               |
| 0.514093469 | Metabolism               |
| 0.86532554  | Metabolism               |
| 0.137722632 | Metabolism               |
| 0.901095072 | Metabolism               |
| 0.951333691 | Metabolism               |
| 0.009920418 | Metabolism               |
| 0.228142941 | Metabolism               |
| 0.658322751 | Metabolism               |
| 0.39419359  | Metabolism               |
| 0.084464041 | Metabolism               |
| 0.599967142 | Metabolism               |

|             |                          |
|-------------|--------------------------|
| 0.004102959 | TME                      |
| 0.018817006 | Proliferation/Metastasis |
| 0.023015516 | Metabolism               |
| 0.066590261 | Proliferation/Metastasis |
| 0.016830925 | TME                      |
| 0.000430078 | Proliferation/Metastasis |
| 6.66E-05    | Proliferation/Metastasis |
| 0.011203651 | TME                      |
| 0.201457215 | TME                      |
| 0.010706521 | Metabolism               |
| 2.09E-09    | Metabolism               |
| 0.072578533 | Proliferation/Metastasis |
| 0.044910914 | Proliferation/Metastasis |
| 2.34E-05    | Proliferation/Metastasis |
| 0.212532958 | Metabolism               |
| 0.020757886 | Metabolism               |
| 0.794304645 | Metabolism               |
| 0.084505574 | Proliferation/Metastasis |
| 0.002507692 | TME                      |
| 0.003097954 | TME                      |
| 0.110444565 | Metabolism               |
| 0.000207515 | Proliferation/Metastasis |
| 7.72E-10    | Metabolism               |
| 0.012606374 | TME                      |
| 0.027916679 | TME                      |
| 0.046143715 | TME                      |
| 9.63E-06    | TME                      |
| 0.014926319 | Metabolism               |
| 0.110057808 | TME                      |
| 0.011715109 | Proliferation/Metastasis |
| 0.010993828 | TME                      |
| 0.354560056 | Proliferation/Metastasis |
| 0.002349518 | Proliferation/Metastasis |
| 0.000562084 | Metabolism               |
| 0.932863948 | Proliferation/Metastasis |
| 0.000728176 | TME                      |
| 0.056473863 | Metabolism               |
| 0.021787089 | TME                      |
| 0.000135534 | TME                      |
| 0.097364295 | TME                      |
| 0.01666215  | TME                      |
| 0.00785383  | TME                      |
| 0.017412778 | TME                      |

|             |                          |
|-------------|--------------------------|
| 0.236096618 | Metabolism               |
| 0.002202263 | TME                      |
| 0.432958043 | Metabolism               |
| 0.570653917 | Metabolism               |
| 4.61E-05    | Proliferation/Metastasis |
| 0.035993924 | Proliferation/Metastasis |
| 0.759767873 | Metabolism               |
| 0.52890813  | Metabolism               |
| 0.164941705 | Metabolism               |
| 0.034276177 | Metabolism               |
| 0.444087381 | Proliferation/Metastasis |
| 0.309501029 | Proliferation/Metastasis |
| 0.439573198 | Metabolism               |
| 0.255808958 | Metabolism               |
| 0.515597604 | Metabolism               |
| 0.002322915 | TME                      |
| 0.240204946 | Metabolism               |
| 0.082381454 | Metabolism               |
| 0.430266923 | Metabolism               |
| 0.000903424 | Metabolism               |
| 0.003304448 | Proliferation/Metastasis |
| 0.01119608  | Metabolism               |
| 0.92697903  | Metabolism               |
| 0.324604576 | Metabolism               |
| 0.824253537 | Metabolism               |
| 0.250005921 | Metabolism               |
| 0.424667775 | Metabolism               |
| 0.695685321 | Proliferation/Metastasis |
| 0.004956489 | Metabolism               |
| 0.329781679 | Metabolism               |
| 0.035133371 | Proliferation/Metastasis |
| 0.002043002 | Metabolism               |
| 0.006993523 | Metabolism               |
| 0.012083479 | Metabolism               |
| 0.083177455 | Metabolism               |
| 0.222790107 | Metabolism               |
| 0.005805017 | Metabolism               |
| 0.791885842 | Metabolism               |
| 0.01096934  | Metabolism               |
| 0.008247157 | TME                      |
| 0.069322138 | TME                      |
| 0.001663084 | TME                      |
| 0.024070541 | TME                      |

|             |                          |
|-------------|--------------------------|
| 0.140667671 | TME                      |
| 0.28117838  | Metabolism               |
| 0.492765904 | Metabolism               |
| 0.00091364  | Proliferation/Metastasis |
| 0.140642911 | Metabolism               |
| 0.016758303 | Proliferation/Metastasis |
| 0.999253921 | Metabolism               |
| 0.133747491 | TME                      |
| 0.153210301 | Metabolism               |
| 0.357419069 | Metabolism               |
| 0.46475814  | Metabolism               |
| 0.507631887 | Metabolism               |
| 0.004360665 | TME                      |
| 0.008534175 | TME                      |
| 0.003624632 | Proliferation/Metastasis |
| 0.007174321 | Metabolism               |
| 0.003432574 | Proliferation/Metastasis |
| 0.939107661 | Proliferation/Metastasis |
| 0.000528567 | TME                      |
| 0.477106236 | TME                      |
| 0.34082987  | TME                      |
| 0.086877517 | TME                      |
| 0.760785186 | Metabolism               |
| 0.129550269 | Proliferation/Metastasis |
| 0.003223791 | Metabolism               |
| 0.242960427 | Metabolism               |
| 0.019116299 | Proliferation/Metastasis |
| 0.000359929 | Proliferation/Metastasis |
| 0.001261346 | Metabolism               |
| 0.660226447 | Metabolism               |
| 0.018453241 | Metabolism               |
| 0.380851981 | Metabolism               |
| 0.195003164 | TME                      |
| 0.993635319 | TME                      |
| 0.731644644 | TME                      |
| 0.260571654 | TME                      |
| 0.094027377 | TME                      |
| 0.000340696 | Metabolism               |
| 0.00147682  | Metabolism               |
| 0.044381148 | Metabolism               |
| 0.000226018 | Metabolism               |
| 0.744036242 | Metabolism               |
| 0.007667351 | TME                      |

|             |                          |
|-------------|--------------------------|
| 0.034357163 | TME                      |
| 0.14343071  | TME                      |
| 0.37511737  | TME                      |
| 0.317205548 | TME                      |
| 0.557162668 | TME                      |
| 0.367019961 | TME                      |
| 0.287690912 | TME                      |
| 0.181624986 | TME                      |
| 1.20E-06    | Proliferation/Metastasis |
| 0.022878923 | Proliferation/Metastasis |
| 0.603292247 | Metabolism               |
| 0.815810049 | Metabolism               |
| 0.234577508 | TME                      |
| 0.347859728 | Metabolism               |
| 0.86500966  | Metabolism               |
| 0.242903031 | TME                      |
| 0.116545589 | Proliferation/Metastasis |
| 0.001146964 | Proliferation/Metastasis |
| 0.422812091 | TME                      |
| 0.00368053  | Metabolism               |
| 0.09404209  | Metabolism               |
| 2.20E-07    | Proliferation/Metastasis |
| 0.000109135 | Proliferation/Metastasis |
| 0.628391813 | TME                      |
| 0.07386786  | TME                      |
| 0.45524716  | TME                      |
| 0.242215922 | TME                      |
| 5.48E-05    | Proliferation/Metastasis |
| 1.95E-05    | TME                      |
| 0.359720822 | TME                      |
| 0.004020172 | Metabolism               |
| 0.088828553 | TME                      |
| 0.144116509 | TME                      |
| 0.448380037 | TME                      |
| 0.470875261 | TME                      |
| 0.097569583 | Metabolism               |
| 0.00012028  | Metabolism               |
| 0.100435174 | Metabolism               |
| 0.00105312  | TME                      |
| 0.502865368 | Metabolism               |
| 0.354781661 | TME                      |
| 0.502725424 | TME                      |
| 0.063222994 | TME                      |

|             |                          |
|-------------|--------------------------|
| 0.301863082 | TME                      |
| 0.133859094 | TME                      |
| 0.512163432 | Metabolism               |
| 5.97E-08    | Proliferation/Metastasis |
| 0.331901144 | Metabolism               |
| 0.393110072 | Proliferation/Metastasis |
| 0.786775    | Metabolism               |
| 0.003973872 | Metabolism               |
| 0.744783505 | Metabolism               |
| 0.174300444 | Metabolism               |
| 0.177730608 | Metabolism               |
| 0.000909829 | Metabolism               |
| 0.127621215 | Metabolism               |
| 0.003337855 | Metabolism               |
| 0.288158612 | Metabolism               |
| 0.53428015  | Metabolism               |
| 0.975606872 | Metabolism               |
| 0.067018184 | Metabolism               |
| 0.076788124 | Metabolism               |
| 0.141086216 | Metabolism               |
| 0.364192897 | TME                      |
| 0.009557069 | Proliferation/Metastasis |
| 0.003301194 | Metabolism               |
| 0.005728215 | Proliferation/Metastasis |
| 0.264900965 | TME                      |
| 0.000408469 | Proliferation/Metastasis |
| 0.415631272 | Proliferation/Metastasis |
| 0.284245968 | TME                      |
| 0.281939865 | TME                      |
| 0.293091262 | Metabolism               |
| 0.755121657 | Metabolism               |
| 0.000402503 | Proliferation/Metastasis |
| 0.000171239 | Proliferation/Metastasis |
| 0.059045531 | Proliferation/Metastasis |
| 0.000294778 | Metabolism               |
| 3.84E-05    | Metabolism               |
| 0.313933246 | Metabolism               |
| 0.85553393  | Proliferation/Metastasis |
| 0.643061929 | TME                      |
| 0.362987547 | TME                      |
| 1.31E-05    | Metabolism               |
| 0.000584642 | Proliferation/Metastasis |
| 0.538386719 | Metabolism               |

|             |                          |
|-------------|--------------------------|
| 0.900265772 | TME                      |
| 0.624442435 | TME                      |
| 1.28E-06    | TME                      |
| 0.000369512 | TME                      |
| 0.010748707 | Metabolism               |
| 0.509491307 | TME                      |
| 0.001640907 | Proliferation/Metastasis |
| 0.447878175 | TME                      |
| 0.666337382 | Proliferation/Metastasis |
| 7.36E-06    | Proliferation/Metastasis |
| 0.681923316 | Metabolism               |
| 1.19E-06    | Proliferation/Metastasis |
| 0.312085944 | TME                      |
| 0.838581816 | Metabolism               |
| 0.022875388 | TME                      |
| 0.771452208 | TME                      |
| 0.519933032 | TME                      |
| 0.410353964 | TME                      |
| 0.073958251 | TME                      |
| 0.334418898 | TME                      |
| 0.001461181 | Metabolism               |
| 0.210256795 | TME                      |
| 0.458060235 | Metabolism               |
| 0.468035177 | Metabolism               |
| 0.906763326 | Proliferation/Metastasis |
| 0.061465578 | Proliferation/Metastasis |
| 0.004791026 | Metabolism               |
| 0.000812348 | Metabolism               |
| 0.159074393 | Metabolism               |
| 0.863083818 | Metabolism               |
| 0.661822287 | Proliferation/Metastasis |
| 0.013299077 | Proliferation/Metastasis |
| 0.013801312 | Metabolism               |
| 0.390611031 | Metabolism               |
| 0.342602717 | Metabolism               |
| 0.000111147 | TME                      |
| 0.348495353 | Metabolism               |
| 0.407865873 | Metabolism               |
| 0.498836867 | Metabolism               |
| 0.591426527 | Metabolism               |
| 0.002842105 | Proliferation/Metastasis |
| 0.229837972 | Metabolism               |
| 0.00086805  | Metabolism               |

|             |                          |
|-------------|--------------------------|
| 0.000553454 | Metabolism               |
| 1.31E-08    | Metabolism               |
| 4.71E-05    | Metabolism               |
| 0.107789997 | Metabolism               |
| 0.405917687 | Proliferation/Metastasis |
| 0.000408662 | Metabolism               |
| 0.04597517  | Metabolism               |
| 0.312594298 | Proliferation/Metastasis |
| 0.283347234 | Metabolism               |
| 0.383483991 | Metabolism               |
| 0.65275255  | Metabolism               |
| 0.505008461 | Metabolism               |
| 0.005288381 | Metabolism               |
| 0.081478716 | Metabolism               |
| 0.001053341 | Metabolism               |
| 0.440522734 | Metabolism               |
| 0.232702834 | TME                      |
| 0.994782831 | TME                      |
| 0.413204379 | TME                      |
| 0.26546244  | TME                      |
| 0.570268263 | TME                      |
| 0.020109166 | Metabolism               |
| 0.043047093 | Metabolism               |
| 0.035747315 | Proliferation/Metastasis |
| 0.0968612   | Metabolism               |
| 0.055266815 | Proliferation/Metastasis |
| 0.071784394 | Metabolism               |
| 5.78E-05    | TME                      |
| 0.001065596 | Metabolism               |
| 0.087718904 | Metabolism               |
| 0.365584304 | Metabolism               |
| 0.000207981 | Metabolism               |
| 0.000623862 | TME                      |
| 0.000159361 | TME                      |
| 0.009656341 | Proliferation/Metastasis |
| 0.388556804 | Metabolism               |
| 4.72E-06    | Proliferation/Metastasis |
| 0.008925715 | Proliferation/Metastasis |
| 0.16505551  | TME                      |
| 0.846700353 | TME                      |
| 0.336952464 | TME                      |
| 0.998189099 | TME                      |
| 0.376337708 | Metabolism               |



|             |                          |
|-------------|--------------------------|
| 0.03931187  | Proliferation/Metastasis |
| 0.091409379 | Metabolism               |
| 0.309687016 | Metabolism               |
| 0.737934288 | Proliferation/Metastasis |
| 0.014561549 | Proliferation/Metastasis |
| 0.021027502 | Metabolism               |
| 0.959522095 | Metabolism               |
| 0.838442238 | Metabolism               |
| 0.488186882 | Metabolism               |
| 0.964583267 | TME                      |
| 0.157984714 | TME                      |
| 0.420776031 | TME                      |
| 0.891677177 | TME                      |
| 0.147078517 | TME                      |
| 0.912366794 | Metabolism               |
| 0.68834829  | Metabolism               |
| 0.62836173  | Metabolism               |
| 0.006318519 | Metabolism               |
| 0.395919523 | Metabolism               |
| 0.027311332 | TME                      |
| 0.74268278  | TME                      |
| 0.985623822 | TME                      |
| 0.777051698 | TME                      |
| 0.910924687 | TME                      |
| 0.911224137 | TME                      |
| 0.899502997 | TME                      |
| 0.263062423 | TME                      |
| 0.974787765 | TME                      |
| 0.995644217 | Proliferation/Metastasis |
| 0.005235505 | Proliferation/Metastasis |
| 0.894839752 | Metabolism               |
| 0.45059382  | Metabolism               |
| 0.105111211 | TME                      |
| 0.639558737 | Metabolism               |
| 0.001627605 | Metabolism               |
| 0.349875349 | TME                      |
| 7.79E-05    | Proliferation/Metastasis |
| 0.04801656  | Proliferation/Metastasis |
| 0.702565185 | TME                      |
| 0.816946208 | Metabolism               |
| 0.032447403 | Metabolism               |
| 0.599407845 | Proliferation/Metastasis |
| 0.006824604 | Proliferation/Metastasis |

|             |                          |
|-------------|--------------------------|
| 0.198415266 | TME                      |
| 0.248719969 | TME                      |
| 0.595939615 | TME                      |
| 0.279212713 | TME                      |
| 0.001682507 | Proliferation/Metastasis |
| 0.039261195 | TME                      |
| 0.525329739 | TME                      |
| 0.403250527 | Metabolism               |
| 0.658085176 | TME                      |
| 0.866287833 | TME                      |
| 0.20969347  | TME                      |
| 0.810134017 | TME                      |
| 0.007034442 | Metabolism               |
| 0.750666621 | Metabolism               |
| 0.582282614 | Metabolism               |
| 0.018536327 | TME                      |
| 0.029625345 | Metabolism               |
| 0.335587768 | TME                      |
| 0.104635386 | TME                      |
| 0.904014724 | TME                      |
| 0.005962653 | TME                      |
| 0.630499584 | TME                      |
| 0.101226049 | Metabolism               |
| 0.642148133 | Proliferation/Metastasis |
| 0.745269337 | Metabolism               |
| 0.002741102 | Proliferation/Metastasis |
| 0.058528438 | Metabolism               |
| 0.954059244 | Metabolism               |
| 0.462597495 | Metabolism               |
| 0.484985234 | Metabolism               |
| 0.887565811 | Metabolism               |
| 0.108511086 | Metabolism               |
| 0.720807243 | Metabolism               |
| 0.011531596 | Metabolism               |
| 0.067717877 | Metabolism               |
| 0.069366665 | Metabolism               |
| 0.033756341 | Metabolism               |
| 0.594743304 | Metabolism               |
| 0.988441406 | Metabolism               |
| 0.521773813 | Metabolism               |
| 0.260970426 | TME                      |
| 0.036030302 | Proliferation/Metastasis |
| 0.756910855 | Metabolism               |

|             |                          |
|-------------|--------------------------|
| 0.381952373 | Proliferation/Metastasis |
| 0.60821274  | TME                      |
| 0.195107423 | Proliferation/Metastasis |
| 0.084393421 | Proliferation/Metastasis |
| 0.81133381  | TME                      |
| 0.93690961  | TME                      |
| 1.12E-05    | Metabolism               |
| 1.73E-06    | Metabolism               |
| 0.197962782 | Proliferation/Metastasis |
| 0.356205273 | Proliferation/Metastasis |
| 0.009727651 | Proliferation/Metastasis |
| 0.120189814 | Metabolism               |
| 0.274467858 | Metabolism               |
| 0.188638445 | Metabolism               |
| 0.175315281 | Proliferation/Metastasis |
| 0.656379516 | TME                      |
| 0.306620105 | TME                      |
| 0.211845538 | Metabolism               |
| 0.058320011 | Proliferation/Metastasis |
| 7.69E-05    | Metabolism               |
| 0.088059081 | TME                      |
| 0.42483697  | TME                      |
| 0.561067514 | TME                      |
| 0.043169591 | TME                      |
| 0.246977197 | Metabolism               |
| 0.287884422 | TME                      |
| 0.005721715 | Proliferation/Metastasis |
| 0.37868564  | TME                      |
| 6.26E-05    | Proliferation/Metastasis |
| 0.371169345 | Proliferation/Metastasis |
| 1.71E-07    | Metabolism               |
| 0.023272325 | Proliferation/Metastasis |
| 0.279619539 | TME                      |
| 0.002598757 | Metabolism               |
| 0.751754019 | TME                      |
| 0.165528111 | TME                      |
| 0.399563529 | TME                      |
| 0.9628701   | TME                      |
| 0.489105993 | TME                      |
| 0.629651419 | TME                      |
| 0.158940521 | Metabolism               |
| 0.485299037 | TME                      |
| 0.168247472 | Metabolism               |

|             |                          |
|-------------|--------------------------|
| 0.910115709 | Metabolism               |
| 0.015042898 | Proliferation/Metastasis |
| 0.47090573  | Proliferation/Metastasis |
| 0.2627598   | Metabolism               |
| 0.138170004 | Metabolism               |
| 0.040721499 | Metabolism               |
| 0.003680211 | Metabolism               |
| 0.415238312 | Proliferation/Metastasis |
| 0.497427833 | Proliferation/Metastasis |
| 0.398781722 | Metabolism               |
| 0.861283007 | Metabolism               |
| 0.170242374 | Metabolism               |
| 0.524011481 | TME                      |
| 0.929213343 | Metabolism               |
| 0.170078153 | Metabolism               |
| 0.755310993 | Metabolism               |
| 0.018833739 | Metabolism               |
| 0.252112217 | Proliferation/Metastasis |
| 0.973680888 | Metabolism               |
| 0.17196591  | Metabolism               |
| 0.207984595 | Metabolism               |
| 0.068274234 | Metabolism               |
| 0.014648147 | Metabolism               |
| 0.632271808 | Metabolism               |
| 0.815764478 | Proliferation/Metastasis |
| 0.523754907 | Metabolism               |
| 0.011665283 | Metabolism               |
| 0.00151545  | Proliferation/Metastasis |
| 0.000302199 | Metabolism               |
| 0.010025543 | Metabolism               |
| 3.67E-05    | Metabolism               |
| 0.403212229 | Metabolism               |
| 0.946733476 | Metabolism               |
| 0.560504288 | Metabolism               |
| 0.791331166 | Metabolism               |
| 0.001996441 | Metabolism               |
| 0.708033386 | TME                      |
| 0.95653588  | TME                      |
| 0.19154696  | TME                      |
| 0.466354323 | TME                      |
| 0.510341147 | TME                      |
| 0.014486128 | Metabolism               |
| 0.163984798 | Metabolism               |

|             |                          |
|-------------|--------------------------|
| 0.040631953 | Proliferation/Metastasis |
| 0.039609616 | Metabolism               |
| 0.069495457 | Proliferation/Metastasis |
| 0.976362666 | Metabolism               |
| 0.364670537 | TME                      |
| 0.471970537 | Metabolism               |
| 0.239306    | Metabolism               |
| 0.360756112 | Metabolism               |
| 0.880099444 | Metabolism               |
| 0.271747659 | TME                      |
| 0.140316154 | TME                      |
| 0.583235519 | Proliferation/Metastasis |
| 0.781853334 | Metabolism               |
| 0.705695496 | Proliferation/Metastasis |
| 0.932094229 | Proliferation/Metastasis |
| 0.009980299 | TME                      |
| 0.001591555 | TME                      |
| 0.001527361 | TME                      |
| 0.000222428 | TME                      |
| 0.190328415 | Metabolism               |
| 0.022139574 | Proliferation/Metastasis |
| 0.055248832 | Metabolism               |
| 1.91E-05    | Metabolism               |
| 0.126567151 | Proliferation/Metastasis |
| 0.001140849 | Proliferation/Metastasis |
| 0.010002775 | Metabolism               |
| 0.00033015  | Metabolism               |
| 0.000843253 | Metabolism               |
| 0.589800742 | Metabolism               |
| 0.032533579 | TME                      |
| 0.005658267 | TME                      |
| 0.006925464 | TME                      |
| 0.003645879 | TME                      |
| 1.42E-06    | TME                      |
| 0.645515115 | Metabolism               |
| 0.002649989 | Metabolism               |
| 0.638396156 | Metabolism               |
| 0.546799403 | Metabolism               |
| 0.537169777 | Metabolism               |
| 0.055007462 | TME                      |
| 0.208163703 | TME                      |
| 4.19E-06    | TME                      |
| 0.005622128 | TME                      |

|             |                          |
|-------------|--------------------------|
| 0.002985719 | TME                      |
| 0.008431793 | TME                      |
| 0.003231803 | TME                      |
| 0.000296535 | TME                      |
| 0.00043982  | TME                      |
| 0.1387022   | Proliferation/Metastasis |
| 0.0922978   | Proliferation/Metastasis |
| 0.960755665 | Metabolism               |
| 0.050040762 | Metabolism               |
| 0.099724525 | TME                      |
| 0.883969083 | Metabolism               |
| 0.035726277 | Metabolism               |
| 0.000118126 | TME                      |
| 0.050672553 | Proliferation/Metastasis |
| 0.105795544 | Proliferation/Metastasis |
| 0.029305086 | TME                      |
| 0.688919965 | Metabolism               |
| 0.000266126 | Metabolism               |
| 0.141564654 | Proliferation/Metastasis |
| 0.139152924 | Proliferation/Metastasis |
| 0.037609692 | TME                      |
| 1.13E-06    | TME                      |
| 0.007874596 | TME                      |
| 0.018622501 | TME                      |
| 0.086129214 | Proliferation/Metastasis |
| 0.043259465 | TME                      |
| 1.02E-05    | TME                      |
| 0.035542733 | Metabolism               |
| 0.00058592  | TME                      |
| 8.19E-05    | TME                      |
| 0.001174825 | TME                      |
| 0.044721291 | TME                      |
| 0.823837756 | Metabolism               |
| 0.188431978 | Metabolism               |
| 0.130957922 | Metabolism               |
| 0.042851442 | TME                      |
| 0.003936999 | Metabolism               |
| 0.021917603 | TME                      |
| 0.01682047  | TME                      |
| 4.46E-05    | TME                      |
| 0.000987147 | TME                      |
| 0.061798232 | TME                      |
| 1.61E-05    | Metabolism               |

|             |                          |
|-------------|--------------------------|
| 0.313242838 | Proliferation/Metastasis |
| 1.90E-08    | Metabolism               |
| 0.006989278 | Proliferation/Metastasis |
| 4.90E-06    | Metabolism               |
| 1.10E-09    | Metabolism               |
| 1.26E-05    | Metabolism               |
| 0.003200783 | Metabolism               |
| 0.039194818 | Metabolism               |
| 0.043428569 | Metabolism               |
| 0.575606093 | Metabolism               |
| 0.014752658 | Metabolism               |
| 0.03577512  | Metabolism               |
| 0.00020157  | Metabolism               |
| 0.001619163 | Metabolism               |
| 0.040382448 | Metabolism               |
| 0.555952934 | Metabolism               |
| 0.465203062 | Metabolism               |
| 0.000183253 | TME                      |
| 0.391696917 | Proliferation/Metastasis |
| 0.757523931 | Metabolism               |
| 7.55E-09    | Proliferation/Metastasis |
| 0.001840421 | TME                      |
| 7.92E-07    | Proliferation/Metastasis |
| 6.75E-05    | Proliferation/Metastasis |
| 0.000314184 | TME                      |
| 4.62E-07    | TME                      |
| 0.023415178 | Metabolism               |
| 0.580047499 | Metabolism               |
| 0.001515027 | Proliferation/Metastasis |
| 0.232016564 | Proliferation/Metastasis |
| 0.000603063 | Proliferation/Metastasis |
| 0.443082533 | Metabolism               |
| 0.042200577 | Metabolism               |
| 0.000354603 | Metabolism               |
| 6.25E-05    | Proliferation/Metastasis |
| 4.49E-05    | TME                      |
| 4.93E-05    | TME                      |
| 0.263572821 | Metabolism               |
| 0.00245346  | Proliferation/Metastasis |
| 0.713515683 | Metabolism               |
| 0.208907183 | TME                      |
| 0.185868032 | TME                      |
| 0.017487577 | TME                      |

|             |                          |
|-------------|--------------------------|
| 0.003080043 | TME                      |
| 0.357793586 | Metabolism               |
| 0.955744096 | TME                      |
| 0.27335544  | Proliferation/Metastasis |
| 9.08E-08    | TME                      |
| 0.12840476  | Proliferation/Metastasis |
| 5.37E-07    | Proliferation/Metastasis |
| 0.835736383 | Metabolism               |
| 0.017348007 | Proliferation/Metastasis |
| 0.000270711 | TME                      |
| 0.684960787 | Metabolism               |
| 0.000714511 | TME                      |
| 0.943612292 | TME                      |
| 0.212241119 | TME                      |
| 5.68E-05    | TME                      |
| 0.000757088 | TME                      |
| 0.000703437 | TME                      |
| 5.03E-09    | Metabolism               |
| 1.85E-09    | TME                      |
| 0.010994069 | Metabolism               |
| 0.379688685 | Metabolism               |
| 0.010242596 | Proliferation/Metastasis |
| 0.211210633 | Proliferation/Metastasis |
| 0.425915237 | Metabolism               |
| 0.369265738 | Metabolism               |
| 0.79832374  | Metabolism               |
| 0.012336877 | Metabolism               |
| 4.34E-07    | Proliferation/Metastasis |
| 0.056743471 | Proliferation/Metastasis |
| 0.200710776 | Metabolism               |
| 0.016355298 | Metabolism               |
| 1.91E-05    | Metabolism               |
| 0.016539989 | TME                      |
| 0.001134052 | Metabolism               |
| 0.024972129 | Metabolism               |
| 0.000260571 | Metabolism               |
| 0.005684761 | Metabolism               |
| 0.008522289 | Proliferation/Metastasis |
| 0.006120607 | Metabolism               |
| 0.354216018 | Metabolism               |
| 0.008421332 | Metabolism               |
| 0.019956694 | Metabolism               |
| 0.012293296 | Metabolism               |



|             |                          |
|-------------|--------------------------|
| 0.876092844 | Metabolism               |
| 0.722087884 | Proliferation/Metastasis |
| 0.814402506 | Metabolism               |
| 0.001153762 | Metabolism               |
| 0.531378642 | Proliferation/Metastasis |
| 0.797590218 | Metabolism               |
| 0.043270148 | Metabolism               |
| 0.026250715 | Metabolism               |
| 0.000402908 | Metabolism               |
| 2.06E-05    | Metabolism               |
| 0.185336255 | Metabolism               |
| 0.34799977  | Metabolism               |
| 0.00260406  | Metabolism               |
| 0.000650173 | TME                      |
| 0.000206968 | TME                      |
| 5.88E-05    | TME                      |
| 4.96E-05    | TME                      |
| 0.001502072 | TME                      |
| 0.285482939 | Metabolism               |
| 0.030685435 | Metabolism               |
| 0.257812135 | Proliferation/Metastasis |
| 0.478669908 | Metabolism               |
| 1.57E-05    | Proliferation/Metastasis |
| 0.11160878  | Metabolism               |
| 0.002958454 | TME                      |
| 0.420076709 | Metabolism               |
| 0.613051228 | Metabolism               |
| 1.35E-06    | Metabolism               |
| 0.157602186 | Metabolism               |
| 0.024069551 | TME                      |
| 0.025675307 | TME                      |
| 0.000416194 | Proliferation/Metastasis |
| 0.769292128 | Metabolism               |
| 0.000864919 | Proliferation/Metastasis |
| 0.844315379 | Proliferation/Metastasis |
| 0.167811109 | TME                      |
| 0.591797003 | TME                      |
| 0.386266596 | TME                      |
| 0.368389134 | TME                      |
| 0.1840348   | Metabolism               |
| 0.126036643 | Proliferation/Metastasis |
| 0.779594945 | Metabolism               |
| 0.191952608 | Metabolism               |

|             |                          |
|-------------|--------------------------|
| 0.708930284 | Proliferation/Metastasis |
| 0.01727361  | Proliferation/Metastasis |
| 0.385467029 | Metabolism               |
| 0.04928492  | Metabolism               |
| 0.023320962 | Metabolism               |
| 0.33051131  | Metabolism               |
| 0.19382515  | TME                      |
| 0.332493498 | TME                      |
| 0.589051292 | TME                      |
| 0.681505092 | TME                      |
| 0.02027672  | TME                      |
| 0.269120782 | Metabolism               |
| 0.000735868 | Metabolism               |
| 0.716631883 | Metabolism               |
| 0.248852955 | Metabolism               |
| 0.856037045 | Metabolism               |
| 0.032611683 | TME                      |
| 0.303248131 | TME                      |
| 0.564708077 | TME                      |
| 0.229530238 | TME                      |
| 0.857918823 | TME                      |
| 0.844798042 | TME                      |
| 0.786259226 | TME                      |
| 0.722250538 | TME                      |
| 0.485678412 | TME                      |
| 0.145064539 | Proliferation/Metastasis |
| 0.343678499 | Proliferation/Metastasis |
| 0.187517486 | Metabolism               |
| 0.22900254  | Metabolism               |
| 0.70042299  | TME                      |
| 0.562229822 | Metabolism               |
| 0.061785277 | Metabolism               |
| 0.162398502 | TME                      |
| 0.545439015 | Proliferation/Metastasis |
| 0.074131019 | Proliferation/Metastasis |
| 0.664594302 | TME                      |
| 0.997705073 | Metabolism               |
| 0.703015023 | Metabolism               |
| 0.058729088 | Proliferation/Metastasis |
| 0.070617132 | Proliferation/Metastasis |
| 0.414456012 | TME                      |
| 0.22387042  | TME                      |
| 0.572940308 | TME                      |

|             |                          |
|-------------|--------------------------|
| 0.64524841  | TME                      |
| 5.79E-05    | Proliferation/Metastasis |
| 0.052424166 | TME                      |
| 0.211244792 | TME                      |
| 0.416972336 | Metabolism               |
| 0.56631624  | TME                      |
| 0.58095082  | TME                      |
| 0.963162958 | TME                      |
| 0.04785133  | TME                      |
| 0.906360068 | Metabolism               |
| 0.819236688 | Metabolism               |
| 0.083515894 | Metabolism               |
| 0.314649174 | TME                      |
| 0.488585476 | Metabolism               |
| 0.2850531   | TME                      |
| 0.120207827 | TME                      |
| 0.324031008 | TME                      |
| 0.170019115 | TME                      |
| 0.875669514 | TME                      |
| 0.148126506 | Metabolism               |
| 0.037923738 | Proliferation/Metastasis |
| 0.027005463 | Metabolism               |
| 0.201587449 | Proliferation/Metastasis |
| 0.846661002 | Metabolism               |
| 0.015906164 | Metabolism               |
| 0.900998227 | Metabolism               |
| 0.126665449 | Metabolism               |
| 0.131336379 | Metabolism               |
| 0.352434586 | Metabolism               |
| 0.628180727 | Metabolism               |
| 0.057859381 | Metabolism               |
| 0.084570191 | Metabolism               |
| 0.909698281 | Metabolism               |
| 0.268132315 | Metabolism               |
| 0.816830117 | Metabolism               |
| 0.256286219 | Metabolism               |
| 0.791257226 | Metabolism               |
| 0.259756901 | TME                      |
| 0.341712929 | Proliferation/Metastasis |
| 0.855843862 | Metabolism               |
| 0.03480243  | Proliferation/Metastasis |
| 0.494451315 | TME                      |
| 0.025290269 | Proliferation/Metastasis |

|             |                          |
|-------------|--------------------------|
| 0.041782061 | Proliferation/Metastasis |
| 0.047224095 | TME                      |
| 0.285349673 | TME                      |
| 0.388488876 | Metabolism               |
| 0.089362781 | Metabolism               |
| 0.36815375  | Proliferation/Metastasis |
| 0.191751881 | Proliferation/Metastasis |
| 0.014766692 | Proliferation/Metastasis |
| 0.404867179 | Metabolism               |
| 0.016256725 | Metabolism               |
| 0.848343117 | Metabolism               |
| 0.306510436 | Proliferation/Metastasis |
| 0.439001618 | TME                      |
| 0.226868279 | TME                      |
| 0.228042912 | Metabolism               |
| 0.087834423 | Proliferation/Metastasis |
| 0.089032571 | Metabolism               |
| 0.229000682 | TME                      |
| 0.709021177 | TME                      |
| 0.256216011 | TME                      |
| 0.132511685 | TME                      |
| 0.880613443 | Metabolism               |
| 0.344952469 | TME                      |
| 0.077719973 | Proliferation/Metastasis |
| 0.167050015 | TME                      |
| 0.633982827 | Proliferation/Metastasis |
| 0.000735674 | Proliferation/Metastasis |
| 0.008876235 | Metabolism               |
| 0.087201737 | Proliferation/Metastasis |
| 0.220923251 | TME                      |
| 0.007860557 | Metabolism               |
| 0.141850859 | TME                      |
| 0.866850636 | TME                      |
| 0.458589452 | TME                      |
| 0.485289906 | TME                      |
| 0.354828938 | TME                      |
| 0.594788455 | TME                      |
| 0.022784616 | Metabolism               |
| 0.040524269 | TME                      |
| 0.217669094 | Metabolism               |
| 0.654725871 | Metabolism               |
| 0.051558745 | Proliferation/Metastasis |
| 0.151489117 | Proliferation/Metastasis |

|             |                          |
|-------------|--------------------------|
| 0.424766431 | Metabolism               |
| 0.357751956 | Metabolism               |
| 0.615041529 | Metabolism               |
| 0.871903507 | Metabolism               |
| 0.195107273 | Proliferation/Metastasis |
| 0.273663654 | Proliferation/Metastasis |
| 0.087696885 | Metabolism               |
| 0.666139777 | Metabolism               |
| 0.051695838 | Metabolism               |
| 0.359915741 | TME                      |
| 0.95055234  | Metabolism               |
| 0.320875813 | Metabolism               |
| 0.573381707 | Metabolism               |
| 0.572873586 | Metabolism               |
| 0.020982616 | Proliferation/Metastasis |
| 0.021223049 | Metabolism               |
| 0.341971908 | Metabolism               |
| 0.666763355 | Metabolism               |
| 0.077211572 | Metabolism               |
| 0.321261575 | Metabolism               |
| 0.230188681 | Metabolism               |
| 0.590736587 | Proliferation/Metastasis |
| 0.814041944 | Metabolism               |
| 0.708583332 | Metabolism               |
| 0.024717855 | Proliferation/Metastasis |
| 0.01411656  | Metabolism               |
| 0.404219059 | Metabolism               |
| 0.015931705 | Metabolism               |
| 0.720139317 | Metabolism               |
| 0.001000141 | Metabolism               |
| 0.614858921 | Metabolism               |
| 0.996789354 | Metabolism               |
| 0.454634189 | Metabolism               |
| 0.446321955 | TME                      |
| 0.648356586 | TME                      |
| 0.23601135  | TME                      |
| 0.151199689 | TME                      |
| 0.818401754 | TME                      |
| 0.014608746 | Metabolism               |
| 0.753377367 | Metabolism               |
| 0.380763984 | Proliferation/Metastasis |
| 0.918215887 | Metabolism               |
| 0.01006022  | Proliferation/Metastasis |

|             |                          |
|-------------|--------------------------|
| 0.373441799 | Metabolism               |
| 0.009572942 | TME                      |
| 0.558324157 | Metabolism               |
| 0.577205794 | Metabolism               |
| 0.238922365 | Metabolism               |
| 0.89576417  | Metabolism               |
| 0.806071185 | TME                      |
| 0.633209826 | TME                      |
| 0.207720784 | Proliferation/Metastasis |
| 0.60748413  | Metabolism               |
| 0.004415952 | Proliferation/Metastasis |
| 0.817166953 | Proliferation/Metastasis |
| 0.00600724  | TME                      |
| 0.920379093 | TME                      |
| 0.669188157 | TME                      |
| 0.577859729 | TME                      |
| 0.002358282 | Metabolism               |
| 0.582201976 | Proliferation/Metastasis |
| 0.846330484 | Metabolism               |
| 0.154264524 | Metabolism               |
| 0.014017881 | Proliferation/Metastasis |
| 8.42E-07    | Proliferation/Metastasis |
| 5.08E-05    | Metabolism               |
| 0.008821091 | Metabolism               |
| 0.727505566 | Metabolism               |
| 0.107858571 | Metabolism               |
| 0.579250086 | TME                      |
| 3.03E-05    | TME                      |
| 0.816405288 | TME                      |
| 0.377940263 | TME                      |
| 2.78E-11    | TME                      |
| 0.517710097 | Metabolism               |
| 0.447660456 | Metabolism               |
| 0.092579597 | Metabolism               |
| 0.013050093 | Metabolism               |
| 0.42196498  | Metabolism               |
| 0.000577566 | TME                      |
| 0.492080155 | TME                      |
| 0.065781035 | TME                      |
| 0.819837909 | TME                      |
| 0.411410574 | TME                      |
| 0.613117988 | TME                      |
| 0.517222948 | TME                      |

|             |                          |
|-------------|--------------------------|
| 0.883325238 | TME                      |
| 0.046095382 | TME                      |
| 0.049932131 | Proliferation/Metastasis |
| 0.00037034  | Proliferation/Metastasis |
| 0.051796542 | Metabolism               |
| 0.048587508 | Metabolism               |
| 0.1263876   | TME                      |
| 0.259540973 | Metabolism               |
| 0.217843    | Metabolism               |
| 0.086484739 | TME                      |
| 0.680974057 | Proliferation/Metastasis |
| 0.107097651 | Proliferation/Metastasis |
| 0.278866343 | TME                      |
| 0.02917521  | Metabolism               |
| 0.199698334 | Metabolism               |
| 0.017914226 | Proliferation/Metastasis |
| 0.006995792 | Proliferation/Metastasis |
| 0.608918747 | TME                      |
| 0.11632155  | TME                      |
| 0.432483899 | TME                      |
| 0.337694365 | TME                      |
| 0.804244085 | Proliferation/Metastasis |
| 1.78E-05    | TME                      |
| 0.118080777 | TME                      |
| 0.622735924 | Metabolism               |
| 0.223087835 | TME                      |
| 0.187366036 | TME                      |
| 0.905309367 | TME                      |
| 3.63E-06    | TME                      |
| 0.078388747 | Metabolism               |
| 0.556382911 | Metabolism               |
| 0.417575848 | Metabolism               |
| 5.64E-05    | TME                      |
| 0.20127242  | Metabolism               |
| 0.371017747 | TME                      |
| 0.019806983 | TME                      |
| 0.976430528 | TME                      |
| 0.025919022 | TME                      |
| 0.297208334 | TME                      |
| 0.822039926 | Metabolism               |
| 0.00734786  | Proliferation/Metastasis |
| 0.08714297  | Metabolism               |
| 8.78E-09    | Proliferation/Metastasis |

|             |                          |
|-------------|--------------------------|
| 0.298797666 | Metabolism               |
| 0.391698691 | Metabolism               |
| 0.060267283 | Metabolism               |
| 0.79590935  | Metabolism               |
| 0.322920108 | Metabolism               |
| 7.43E-10    | Metabolism               |
| 0.001550498 | Metabolism               |
| 0.255102647 | Metabolism               |
| 0.198113397 | Metabolism               |
| 0.03670002  | Metabolism               |
| 4.39E-05    | Metabolism               |
| 0.029926637 | Metabolism               |
| 0.068209632 | Metabolism               |
| 0.033644581 | Metabolism               |
| 0.165703633 | TME                      |
| 9.08E-06    | Proliferation/Metastasis |
| 0.007179434 | Metabolism               |
| 3.50E-05    | Proliferation/Metastasis |
| 0.885282971 | TME                      |
| 0.000534031 | Proliferation/Metastasis |
| 0.052735959 | Proliferation/Metastasis |
| 0.79229289  | TME                      |
| 0.20011705  | TME                      |
| 0.044072055 | Metabolism               |
| 0.005231134 | Metabolism               |
| 0.257125645 | Proliferation/Metastasis |
| 1.14E-05    | Proliferation/Metastasis |
| 6.08E-06    | Proliferation/Metastasis |
| 0.74195356  | Metabolism               |
| 0.075007348 | Metabolism               |
| 3.05E-05    | Metabolism               |
| 0.208728242 | Proliferation/Metastasis |
| 0.34380437  | TME                      |
| 0.011724678 | TME                      |
| 0.406306471 | Metabolism               |
| 5.52E-06    | Proliferation/Metastasis |
| 0.021131806 | Metabolism               |
| 0.774072525 | TME                      |
| 0.725321053 | TME                      |
| 2.65E-08    | TME                      |
| 0.006144806 | TME                      |
| 0.008843631 | Metabolism               |
| 0.289927142 | TME                      |



|             |                          |
|-------------|--------------------------|
| 0.00360326  | Proliferation/Metastasis |
| 0.003620545 | TME                      |
| 0.001509485 | Proliferation/Metastasis |
| 0.361339024 | Proliferation/Metastasis |
| 0.004257457 | Metabolism               |
| 0.422471263 | Proliferation/Metastasis |
| 0.215829909 | TME                      |
| 0.674202123 | Metabolism               |
| 0.019376018 | TME                      |
| 0.075074206 | TME                      |
| 0.021039757 | TME                      |
| 0.346055673 | TME                      |
| 0.839179919 | TME                      |
| 0.376065556 | TME                      |
| 0.033725987 | Metabolism               |
| 0.002491093 | TME                      |
| 0.841999327 | Metabolism               |
| 0.034580327 | Metabolism               |
| 0.511958301 | Proliferation/Metastasis |
| 0.001609319 | Proliferation/Metastasis |
| 0.08299835  | Metabolism               |
| 0.167674222 | Metabolism               |
| 0.123855406 | Metabolism               |
| 0.743379799 | Metabolism               |
| 0.001467721 | Proliferation/Metastasis |
| 0.744374163 | Proliferation/Metastasis |
| 0.246212656 | Metabolism               |
| 0.183541342 | Metabolism               |
| 0.017006224 | Metabolism               |
| 3.16E-05    | TME                      |
| 0.144318659 | Metabolism               |
| 0.112683092 | Metabolism               |
| 0.024986434 | Metabolism               |
| 0.721119235 | Metabolism               |
| 0.445142591 | Proliferation/Metastasis |
| 0.658410282 | Metabolism               |
| 0.001678329 | Metabolism               |
| 0.023674419 | Metabolism               |
| 0.963803509 | Metabolism               |
| 0.316078969 | Metabolism               |
| 0.031908014 | Metabolism               |
| 0.36071646  | Proliferation/Metastasis |
| 0.002553656 | Metabolism               |

|             |                          |
|-------------|--------------------------|
| 0.017558932 | Metabolism               |
| 0.560867431 | Proliferation/Metastasis |
| 0.66272452  | Metabolism               |
| 0.26202313  | Metabolism               |
| 0.382843782 | Metabolism               |
| 0.98242035  | Metabolism               |
| 0.214219037 | Metabolism               |
| 0.30470593  | Metabolism               |
| 0.003221158 | Metabolism               |
| 0.007326752 | Metabolism               |
| 0.209694871 | TME                      |
| 0.505950425 | TME                      |
| 0.290429944 | TME                      |
| 0.113253123 | TME                      |
| 0.437249364 | TME                      |
| 0.676044525 | Metabolism               |
| 0.173355512 | Metabolism               |
| 0.008219441 | Proliferation/Metastasis |
| 0.339455067 | Metabolism               |
| 0.064207794 | Proliferation/Metastasis |
| 0.431791231 | Metabolism               |
| 0.000850943 | TME                      |
| 0.002484471 | Metabolism               |
| 0.868397327 | Metabolism               |
| 0.000114583 | Metabolism               |
| 0.114871258 | Metabolism               |
| 0.020579816 | TME                      |
| 0.00418439  | TME                      |
| 0.013586731 | Proliferation/Metastasis |
| 0.034965678 | Metabolism               |
| 1.76E-07    | Proliferation/Metastasis |
| 0.003134762 | Proliferation/Metastasis |
| 0.879621939 | TME                      |
| 0.700156001 | TME                      |
| 0.565458098 | TME                      |
| 0.757229952 | TME                      |
| 0.158915807 | Metabolism               |
| 0.457132092 | Proliferation/Metastasis |
| 0.65742357  | Metabolism               |
| 0.023953477 | Metabolism               |
| 0.026779051 | Proliferation/Metastasis |
| 0.880478511 | Proliferation/Metastasis |
| 0.00811677  | Metabolism               |

|             |                          |
|-------------|--------------------------|
| 0.172674044 | Metabolism               |
| 0.372662023 | Metabolism               |
| 0.440374031 | Metabolism               |
| 0.13819688  | TME                      |
| 0.729027465 | TME                      |
| 0.111232964 | TME                      |
| 0.835206909 | TME                      |
| 0.632005899 | TME                      |
| 0.415780836 | Metabolism               |
| 3.72E-06    | Metabolism               |
| 0.934188343 | Metabolism               |
| 0.01057933  | Metabolism               |
| 0.426728119 | Metabolism               |
| 0.047415837 | TME                      |
| 0.942771434 | TME                      |
| 0.646895128 | TME                      |
| 0.415987589 | TME                      |
| 0.714522031 | TME                      |
| 0.606108651 | TME                      |
| 0.608931233 | TME                      |
| 0.628710018 | TME                      |
| 0.992196929 | TME                      |
| 0.025811438 | Proliferation/Metastasis |
| 0.000955653 | Proliferation/Metastasis |
| 0.039253434 | Metabolism               |
| 0.649355353 | Metabolism               |
| 0.257095236 | TME                      |
| 0.463192571 | Metabolism               |
| 0.553213915 | Metabolism               |
| 0.41322583  | TME                      |
| 6.79E-06    | Proliferation/Metastasis |
| 3.22E-06    | Proliferation/Metastasis |
| 0.946741624 | TME                      |
| 0.994938271 | Metabolism               |
| 0.006201896 | Metabolism               |
| 0.019219037 | Proliferation/Metastasis |
| 0.485053847 | Proliferation/Metastasis |
| 0.343197839 | TME                      |
| 0.298547994 | TME                      |
| 0.504126033 | TME                      |
| 0.447380698 | TME                      |
| 0.825277295 | Proliferation/Metastasis |
| 0.730472772 | TME                      |

|             |                          |
|-------------|--------------------------|
| 0.579208557 | TME                      |
| 0.414258176 | Metabolism               |
| 0.776509133 | TME                      |
| 0.3357306   | TME                      |
| 0.90169405  | TME                      |
| 0.044718117 | TME                      |
| 0.431098994 | Metabolism               |
| 0.002020799 | Metabolism               |
| 0.004108171 | Metabolism               |
| 0.584133118 | TME                      |
| 0.000165625 | Metabolism               |
| 0.074760165 | TME                      |
| 0.504526622 | TME                      |
| 0.37775547  | TME                      |
| 0.561628856 | TME                      |
| 0.584211188 | TME                      |
| 0.308699905 | Metabolism               |
| 0.098198932 | Proliferation/Metastasis |
| 0.028798092 | Metabolism               |
| 0.766718531 | Proliferation/Metastasis |
| 0.004324478 | Metabolism               |
| 0.201214582 | Metabolism               |
| 0.011509652 | Metabolism               |
| 0.009917165 | Metabolism               |
| 0.006472948 | Metabolism               |
| 0.710494144 | Metabolism               |
| 0.814003951 | Metabolism               |
| 0.011945567 | Metabolism               |
| 0.231283387 | Metabolism               |
| 0.02581329  | Metabolism               |
| 0.015662897 | Metabolism               |
| 0.275257509 | Metabolism               |
| 0.073059743 | Metabolism               |
| 0.168102359 | Metabolism               |
| 0.590699911 | TME                      |
| 0.007864784 | Proliferation/Metastasis |
| 0.676198165 | Metabolism               |
| 0.671610688 | Proliferation/Metastasis |
| 0.733606835 | TME                      |
| 0.331320584 | Proliferation/Metastasis |
| 0.20054682  | Proliferation/Metastasis |
| 0.193800857 | TME                      |
| 0.783749351 | TME                      |

|             |                          |
|-------------|--------------------------|
| 0.140460841 | Metabolism               |
| 2.38E-05    | Metabolism               |
| 0.036977141 | Proliferation/Metastasis |
| 0.00758322  | Proliferation/Metastasis |
| 0.220971863 | Proliferation/Metastasis |
| 0.39510306  | Metabolism               |
| 0.161571247 | Metabolism               |
| 0.622478593 | Metabolism               |
| 0.970150482 | Proliferation/Metastasis |
| 0.37082722  | TME                      |
| 0.537232642 | TME                      |
| 0.003980464 | Metabolism               |
| 0.242113946 | Proliferation/Metastasis |
| 0.002299366 | Metabolism               |
| 0.898810981 | TME                      |
| 0.345768589 | TME                      |
| 0.729744038 | TME                      |
| 0.18349659  | TME                      |
| 0.160034612 | Metabolism               |
| 0.100433913 | TME                      |
| 0.291413605 | Proliferation/Metastasis |
| 0.824399373 | TME                      |
| 0.185188616 | Proliferation/Metastasis |
| 0.45971665  | Proliferation/Metastasis |
| 0.061028961 | Metabolism               |
| 0.094565929 | Proliferation/Metastasis |
| 0.510778561 | TME                      |
| 7.14E-05    | Metabolism               |
| 0.554790211 | TME                      |
| 0.018325585 | TME                      |
| 2.07E-05    | TME                      |
| 0.514283303 | TME                      |
| 0.834844569 | TME                      |
| 0.149460321 | TME                      |
| 0.749286116 | Metabolism               |
| 0.684394959 | TME                      |
| 0.141324192 | Metabolism               |
| 0.863103237 | Metabolism               |
| 0.106168724 | Proliferation/Metastasis |
| 0.005182407 | Proliferation/Metastasis |
| 0.294197422 | Metabolism               |
| 0.579965318 | Metabolism               |
| 0.152045226 | Metabolism               |

|             |                          |
|-------------|--------------------------|
| 0.006291275 | Metabolism               |
| 0.125091523 | Proliferation/Metastasis |
| 0.812890099 | Proliferation/Metastasis |
| 0.384203799 | Metabolism               |
| 0.430295072 | Metabolism               |
| 0.061803547 | Metabolism               |
| 0.742800821 | TME                      |
| 0.295532792 | Metabolism               |
| 0.981367965 | Metabolism               |
| 0.208272101 | Metabolism               |
| 0.06110599  | Metabolism               |
| 0.292167553 | Proliferation/Metastasis |
| 0.187691773 | Metabolism               |
| 0.065991089 | Metabolism               |
| 0.566689325 | Metabolism               |
| 0.012966908 | Metabolism               |
| 4.54E-05    | Metabolism               |
| 0.000725304 | Metabolism               |
| 0.284345959 | Proliferation/Metastasis |
| 0.00032027  | Metabolism               |
| 0.038965428 | Metabolism               |
| 0.393621154 | Proliferation/Metastasis |
| 0.000123997 | Metabolism               |
| 0.037885998 | Metabolism               |
| 0.215673971 | Metabolism               |
| 0.240928108 | Metabolism               |
| 7.55E-06    | Metabolism               |
| 0.677776329 | Metabolism               |
| 0.207044162 | Metabolism               |
| 9.71E-05    | Metabolism               |
| 0.257900053 | TME                      |
| 0.281455827 | TME                      |
| 0.360341286 | TME                      |
| 0.537144364 | TME                      |
| 0.447680443 | TME                      |
| 0.379394943 | Metabolism               |
| 0.431596323 | Metabolism               |
| 0.015440044 | Proliferation/Metastasis |
| 0.005701035 | Metabolism               |
| 0.426261958 | Proliferation/Metastasis |
| 0.016984263 | Metabolism               |
| 0.801384219 | TME                      |
| 0.004582385 | Metabolism               |

|             |                          |
|-------------|--------------------------|
| 0.958819093 | Metabolism               |
| 0.594394824 | Metabolism               |
| 0.371785495 | Metabolism               |
| 0.825195055 | TME                      |
| 0.81142996  | TME                      |
| 0.363712983 | Proliferation/Metastasis |
| 0.173743561 | Metabolism               |
| 0.423661527 | Proliferation/Metastasis |
| 0.284367047 | Proliferation/Metastasis |
| 0.164957822 | TME                      |
| 0.816955713 | TME                      |
| 0.445709651 | TME                      |
| 0.920246691 | TME                      |
| 8.95E-07    | Metabolism               |
| 3.98E-07    | Proliferation/Metastasis |
| 0.155723508 | Metabolism               |
| 2.31E-07    | Metabolism               |
| 0.227810226 | Proliferation/Metastasis |
| 0.04989629  | Proliferation/Metastasis |
| 0.806407475 | Metabolism               |
| 8.74E-08    | Metabolism               |
| 0.009573493 | Metabolism               |
| 5.64E-07    | Metabolism               |
| 0.585905216 | TME                      |
| 4.73E-05    | TME                      |
| 0.74712624  | TME                      |
| 0.548867208 | TME                      |
| 0.447392867 | TME                      |
| 0.002892408 | Metabolism               |
| 2.51E-06    | Metabolism               |
| 0.051712781 | Metabolism               |
| 2.66E-05    | Metabolism               |
| 0.921539108 | Metabolism               |
| 0.002263232 | TME                      |
| 0.065486229 | TME                      |
| 0.003343743 | TME                      |
| 0.712987857 | TME                      |
| 0.028516353 | TME                      |
| 0.22301391  | TME                      |
| 0.226497858 | TME                      |
| 0.697773689 | TME                      |
| 0.926385988 | TME                      |
| 2.44E-06    | Proliferation/Metastasis |

|             |                          |
|-------------|--------------------------|
| 0.936184968 | Proliferation/Metastasis |
| 0.000276159 | Metabolism               |
| 5.99E-10    | Metabolism               |
| 0.059465277 | TME                      |
| 0.072263024 | Metabolism               |
| 0.673010802 | Metabolism               |
| 0.152759129 | TME                      |
| 7.31E-14    | Proliferation/Metastasis |
| 3.63E-13    | Proliferation/Metastasis |
| 0.205496846 | TME                      |
| 3.04E-05    | Metabolism               |
| 3.77E-18    | Metabolism               |
| 7.41E-11    | Proliferation/Metastasis |
| 8.87E-06    | Proliferation/Metastasis |
| 0.164832924 | TME                      |
| 0.00072227  | TME                      |
| 0.505561187 | TME                      |
| 0.02174819  | TME                      |
| 1.25E-06    | Proliferation/Metastasis |
| 0.296497146 | TME                      |
| 0.331522415 | TME                      |
| 0.498417725 | Metabolism               |
| 0.570065414 | TME                      |
| 0.190227935 | TME                      |
| 0.793923101 | TME                      |
| 0.468000346 | TME                      |
| 0.044207886 | Metabolism               |
| 2.50E-05    | Metabolism               |
| 1.34E-11    | Metabolism               |
| 0.00827329  | TME                      |
| 8.42E-05    | Metabolism               |
| 0.080088456 | TME                      |
| 0.02435389  | TME                      |
| 0.349142243 | TME                      |
| 0.537283877 | TME                      |
| 0.977942006 | TME                      |
| 3.05E-06    | Metabolism               |
| 8.92E-06    | Proliferation/Metastasis |
| 0.000121913 | Metabolism               |
| 0.000191757 | Proliferation/Metastasis |
| 6.39E-11    | Metabolism               |
| 0.524882952 | Metabolism               |
| 0.626885131 | Metabolism               |



|             |                          |
|-------------|--------------------------|
| 7.87E-06    | Metabolism               |
| 1.17E-07    | Metabolism               |
| 0.302012554 | Metabolism               |
| 0.01289047  | Metabolism               |
| 0.447771835 | Metabolism               |
| 0.137941671 | Metabolism               |
| 0.419426504 | Metabolism               |
| 0.839364229 | Metabolism               |
| 0.300309488 | Metabolism               |
| 2.64E-06    | Metabolism               |
| 1.42E-09    | Metabolism               |
| 0.425172665 | TME                      |
| 1.08E-05    | Proliferation/Metastasis |
| 0.900952561 | Metabolism               |
| 0.426904224 | Proliferation/Metastasis |
| 0.984871659 | TME                      |
| 0.425761682 | Proliferation/Metastasis |
| 0.449168805 | Proliferation/Metastasis |
| 0.417980352 | TME                      |
| 0.403241919 | TME                      |
| 3.14E-05    | Metabolism               |
| 0.01240922  | Metabolism               |
| 0.0435511   | Proliferation/Metastasis |
| 6.16E-10    | Proliferation/Metastasis |
| 0.005703978 | Proliferation/Metastasis |
| 0.357683392 | Metabolism               |
| 0.079887257 | Metabolism               |
| 0.912361037 | Metabolism               |
| 0.421431243 | Proliferation/Metastasis |
| 0.515574095 | TME                      |
| 0.222603385 | TME                      |
| 0.124781666 | Metabolism               |
| 2.72E-05    | Proliferation/Metastasis |
| 0.381825473 | Metabolism               |
| 0.884601194 | TME                      |
| 0.172745799 | TME                      |
| 0.805518386 | TME                      |
| 0.004734864 | TME                      |
| 5.57E-07    | Metabolism               |
| 0.272428246 | TME                      |
| 0.023080528 | Proliferation/Metastasis |
| 0.315374313 | TME                      |
| 0.173817073 | Proliferation/Metastasis |

|             |                          |
|-------------|--------------------------|
| 1.07E-11    | Proliferation/Metastasis |
| 0.001921471 | Metabolism               |
| 6.14E-18    | Proliferation/Metastasis |
| 0.118030733 | TME                      |
| 0.001249428 | Metabolism               |
| 0.042339427 | TME                      |
| 2.40E-05    | TME                      |
| 8.17E-06    | TME                      |
| 0.539358397 | TME                      |
| 2.30E-05    | TME                      |
| 0.000204534 | TME                      |
| 0.916566606 | Metabolism               |
| 0.881366351 | TME                      |
| 0.002032033 | Metabolism               |
| 0.876009146 | Metabolism               |
| 0.623463526 | Proliferation/Metastasis |
| 0.240915128 | Proliferation/Metastasis |
| 7.69E-07    | Metabolism               |
| 0.321562282 | Metabolism               |
| 0.382628683 | Metabolism               |
| 1.13E-07    | Metabolism               |
| 0.607593424 | Proliferation/Metastasis |
| 0.197509119 | Proliferation/Metastasis |
| 0.025533174 | Metabolism               |
| 1.93E-13    | Metabolism               |
| 3.57E-08    | Metabolism               |
| 0.016758805 | TME                      |
| 0.02694217  | Metabolism               |
| 0.0204638   | Metabolism               |
| 0.000214777 | Metabolism               |
| 0.661808489 | Metabolism               |
| 0.002221464 | Proliferation/Metastasis |
| 1.32E-09    | Metabolism               |
| 0.004749686 | Metabolism               |
| 0.013807292 | Metabolism               |
| 2.27E-27    | Metabolism               |
| 2.41E-25    | Metabolism               |
| 4.65E-08    | Metabolism               |
| 0.756603454 | Proliferation/Metastasis |
| 0.005786554 | Metabolism               |
| 7.11E-08    | Metabolism               |
| 6.86E-06    | Proliferation/Metastasis |
| 1.10E-09    | Metabolism               |

|             |                          |
|-------------|--------------------------|
| 0.000673721 | Metabolism               |
| 0.021567205 | Metabolism               |
| 0.900545467 | Metabolism               |
| 1.65E-06    | Metabolism               |
| 0.000825025 | Metabolism               |
| 0.001019866 | Metabolism               |
| 2.67E-05    | Metabolism               |
| 0.351433204 | TME                      |
| 0.642828102 | TME                      |
| 0.12276588  | TME                      |
| 0.219771923 | TME                      |
| 0.277723309 | TME                      |
| 0.39646316  | Metabolism               |
| 1.91E-07    | Metabolism               |
| 0.026223047 | Proliferation/Metastasis |
| 0.016114181 | Metabolism               |
| 0.321077121 | Proliferation/Metastasis |
| 0.000219715 | Metabolism               |
| 0.547877548 | TME                      |
| 0.015565913 | Metabolism               |
| 6.10E-07    | Metabolism               |
| 0.17963357  | Metabolism               |
| 9.12E-05    | Metabolism               |
| 0.189687396 | TME                      |
| 0.013599126 | TME                      |
| 0.040245475 | Proliferation/Metastasis |
| 0.095543955 | Metabolism               |
| 0.001057621 | Proliferation/Metastasis |
| 0.053388905 | Proliferation/Metastasis |
| 0.076747118 | TME                      |
| 0.069398558 | TME                      |
| 0.009414697 | TME                      |
| 0.002672718 | TME                      |
| 0.641715552 | Metabolism               |
| 0.006050435 | Proliferation/Metastasis |
| 0.192773544 | Metabolism               |
| 0.241587533 | Metabolism               |
| 1.64E-05    | Proliferation/Metastasis |
| 8.31E-06    | Proliferation/Metastasis |
| 0.016268826 | Metabolism               |
| 0.016337794 | Metabolism               |
| 0.778637385 | Metabolism               |
| 0.892965284 | Metabolism               |

|             |                          |
|-------------|--------------------------|
| 0.037891663 | TME                      |
| 0.00368767  | TME                      |
| 0.00015838  | TME                      |
| 0.114780278 | TME                      |
| 3.19E-05    | TME                      |
| 0.001046977 | Metabolism               |
| 0.006259915 | Metabolism               |
| 0.331074616 | Metabolism               |
| 0.569764752 | Metabolism               |
| 0.019963207 | Metabolism               |
| 3.78E-06    | TME                      |
| 0.000833522 | TME                      |
| 0.001796327 | TME                      |
| 0.021213036 | TME                      |
| 0.000879682 | TME                      |
| 0.00515616  | TME                      |
| 0.003855193 | TME                      |
| 0.012745037 | TME                      |
| 0.008865074 | TME                      |
| 0.606762305 | Proliferation/Metastasis |
| 0.235408149 | Proliferation/Metastasis |
| 0.405581753 | Metabolism               |
| 0.168670541 | Metabolism               |
| 0.031969723 | TME                      |
| 0.028756969 | Metabolism               |
| 0.61937741  | Metabolism               |
| 0.001507755 | TME                      |
| 0.383884452 | Proliferation/Metastasis |
| 0.918692161 | Proliferation/Metastasis |
| 0.575566972 | TME                      |
| 0.072796871 | Metabolism               |
| 0.717829795 | Metabolism               |
| 0.369081963 | Proliferation/Metastasis |
| 0.004427922 | Proliferation/Metastasis |
| 0.006117761 | TME                      |
| 0.00163476  | TME                      |
| 0.001072502 | TME                      |
| 0.001430336 | TME                      |
| 0.05494551  | Proliferation/Metastasis |
| 2.88E-05    | TME                      |
| 0.001046466 | TME                      |
| 0.564837695 | Metabolism               |
| 2.59E-05    | TME                      |

|             |                          |
|-------------|--------------------------|
| 0.00012867  | TME                      |
| 0.030140552 | TME                      |
| 0.164543353 | TME                      |
| 0.700258259 | Metabolism               |
| 0.767620343 | Metabolism               |
| 0.038122804 | Metabolism               |
| 0.000517098 | TME                      |
| 0.718828929 | Metabolism               |
| 0.018754321 | TME                      |
| 0.000551861 | TME                      |
| 0.002656286 | TME                      |
| 0.05424922  | TME                      |
| 0.098315729 | TME                      |
| 0.375800024 | Metabolism               |
| 0.963090809 | Proliferation/Metastasis |
| 0.391491389 | Metabolism               |
| 5.69E-05    | Proliferation/Metastasis |
| 0.069179468 | Metabolism               |
| 0.7763743   | Metabolism               |
| 0.002723194 | Metabolism               |
| 0.150497525 | Metabolism               |
| 0.361730106 | Metabolism               |
| 2.48E-05    | Metabolism               |
| 2.95E-05    | Metabolism               |
| 0.013105337 | Metabolism               |
| 0.029928079 | Metabolism               |
| 0.092715921 | Metabolism               |
| 0.208521853 | Metabolism               |
| 0.05278845  | Metabolism               |
| 0.359555849 | Metabolism               |
| 0.117898076 | Metabolism               |
| 0.000868595 | TME                      |
| 0.004858536 | Proliferation/Metastasis |
| 0.001491994 | Metabolism               |
| 0.000801728 | Proliferation/Metastasis |
| 0.012633028 | TME                      |
| 1.75E-05    | Proliferation/Metastasis |
| 0.000826305 | Proliferation/Metastasis |
| 0.001656505 | TME                      |
| 0.01614822  | TME                      |
| 0.523209304 | Metabolism               |
| 0.03109599  | Metabolism               |
| 0.029870431 | Proliferation/Metastasis |

|             |                          |
|-------------|--------------------------|
| 0.364696722 | Proliferation/Metastasis |
| 5.71E-07    | Proliferation/Metastasis |
| 0.87141174  | Metabolism               |
| 0.031382131 | Metabolism               |
| 0.514533363 | Metabolism               |
| 0.001704653 | Proliferation/Metastasis |
| 0.00070175  | TME                      |
| 0.002175068 | TME                      |
| 0.276070374 | Metabolism               |
| 0.002401718 | Proliferation/Metastasis |
| 0.003982271 | Metabolism               |
| 0.090233089 | TME                      |
| 0.031042083 | TME                      |
| 3.03E-05    | TME                      |
| 0.000224763 | TME                      |
| 0.038990043 | Metabolism               |
| 0.001347486 | TME                      |
| 0.800841743 | Proliferation/Metastasis |
| 0.000188615 | TME                      |
| 0.197274551 | Proliferation/Metastasis |
| 0.001102092 | Proliferation/Metastasis |
| 0.001290264 | Metabolism               |
| 0.240736878 | Proliferation/Metastasis |
| 0.001058337 | TME                      |
| 0.018282722 | Metabolism               |
| 0.64882082  | TME                      |
| 0.0008041   | TME                      |
| 0.000260402 | TME                      |
| 0.000789805 | TME                      |
| 0.07044757  | TME                      |
| 5.60E-05    | TME                      |
| 0.800118964 | Metabolism               |
| 8.23E-05    | TME                      |
| 0.154009823 | Metabolism               |
| 0.074950751 | Metabolism               |
| 0.002622534 | Proliferation/Metastasis |
| 0.260554566 | Proliferation/Metastasis |
| 0.831306271 | Metabolism               |
| 0.377861413 | Metabolism               |
| 0.228473673 | Metabolism               |
| 0.861746413 | Metabolism               |
| 0.001774376 | Proliferation/Metastasis |
| 0.008327753 | Proliferation/Metastasis |

|             |                          |
|-------------|--------------------------|
| 0.032419659 | Metabolism               |
| 0.148159744 | Metabolism               |
| 0.116970369 | Metabolism               |
| 0.000327638 | TME                      |
| 0.045758099 | Metabolism               |
| 0.436549878 | Metabolism               |
| 0.080779288 | Metabolism               |
| 0.000118985 | Metabolism               |
| 0.022500244 | Proliferation/Metastasis |
| 0.825594775 | Metabolism               |
| 0.02344765  | Metabolism               |
| 0.206133101 | Metabolism               |
| 0.622849553 | Metabolism               |
| 0.945575452 | Metabolism               |
| 0.315190316 | Metabolism               |
| 0.659317868 | Proliferation/Metastasis |
| 0.000557226 | Metabolism               |
| 0.748007212 | Metabolism               |
| 0.004742669 | Proliferation/Metastasis |
| 0.452451394 | Metabolism               |
| 0.058983542 | Metabolism               |
| 0.004172677 | Metabolism               |
| 0.439355794 | Metabolism               |
| 0.237746016 | Metabolism               |
| 0.005347854 | Metabolism               |
| 0.023718519 | Metabolism               |
| 0.324020512 | Metabolism               |
| 0.00028151  | TME                      |
| 0.001440224 | TME                      |
| 0.016246249 | TME                      |
| 0.00080096  | TME                      |
| 0.006683399 | TME                      |
| 0.133509047 | Metabolism               |
| 0.152608477 | Metabolism               |
| 0.001313165 | Proliferation/Metastasis |
| 0.070419145 | Metabolism               |
| 0.002708476 | Proliferation/Metastasis |
| 0.213327774 | Metabolism               |
| 0.433421081 | TME                      |
| 0.023720609 | Metabolism               |
| 0.436191114 | Metabolism               |
| 0.028414672 | Metabolism               |
| 0.843561791 | Metabolism               |

|             |                          |
|-------------|--------------------------|
| 0.027521025 | TME                      |
| 0.01249696  | TME                      |
| 0.133795589 | Proliferation/Metastasis |
| 0.993306082 | Metabolism               |
| 0.02487817  | Proliferation/Metastasis |
| 0.302875188 | Proliferation/Metastasis |
| 0.461961821 | TME                      |
| 2.45E-14    | TME                      |
| 2.87E-18    | TME                      |
| 3.16E-14    | TME                      |
| 0.674983852 | Metabolism               |
| 1.25E-11    | Proliferation/Metastasis |
| 0.114667079 | Metabolism               |
| 4.71E-23    | Metabolism               |
| 0.043502358 | Proliferation/Metastasis |
| 1.01E-08    | Proliferation/Metastasis |
| 3.76E-11    | Metabolism               |
| 0.001311206 | Metabolism               |
| 0.021761788 | Metabolism               |
| 0.021801976 | Metabolism               |
| 4.79E-05    | TME                      |
| 3.68E-13    | TME                      |
| 4.16E-11    | TME                      |
| 4.67E-07    | TME                      |
| 7.09E-15    | TME                      |
| 0.24021629  | Metabolism               |
| 1.76E-05    | Metabolism               |
| 0.035036764 | Metabolism               |
| 0.745798264 | Metabolism               |
| 0.929294498 | Metabolism               |
| 1.15E-05    | TME                      |
| 3.13E-06    | TME                      |
| 9.11E-16    | TME                      |
| 5.29E-10    | TME                      |
| 3.29E-13    | TME                      |
| 3.76E-14    | TME                      |
| 4.20E-15    | TME                      |
| 1.03E-16    | TME                      |
| 2.53E-14    | TME                      |
| 0.894575881 | Proliferation/Metastasis |
| 1.10E-07    | Proliferation/Metastasis |
| 3.91E-09    | Metabolism               |
| 0.15156402  | Metabolism               |



|             |                          |
|-------------|--------------------------|
| 0.002687646 | TME                      |
| 0.020898798 | Metabolism               |
| 0.45617483  | Metabolism               |
| 4.94E-21    | TME                      |
| 0.000272409 | Proliferation/Metastasis |
| 0.056424752 | Proliferation/Metastasis |
| 0.000337501 | TME                      |
| 0.612046604 | Metabolism               |
| 1.70E-06    | Metabolism               |
| 0.652290184 | Proliferation/Metastasis |
| 0.002893721 | Proliferation/Metastasis |
| 2.05E-13    | TME                      |
| 1.57E-15    | TME                      |
| 1.25E-13    | TME                      |
| 3.13E-12    | TME                      |
| 0.000658046 | Proliferation/Metastasis |
| 1.87E-06    | TME                      |
| 6.42E-22    | TME                      |
| 0.071543656 | Metabolism               |
| 8.48E-22    | TME                      |
| 4.19E-16    | TME                      |
| 1.14E-13    | TME                      |
| 0.713553326 | TME                      |
| 0.048517727 | Metabolism               |
| 0.00339592  | Metabolism               |
| 3.53E-05    | Metabolism               |
| 8.63E-10    | TME                      |
| 0.002916319 | Metabolism               |
| 1.55E-10    | TME                      |
| 0.002625649 | TME                      |
| 1.60E-13    | TME                      |
| 4.51E-12    | TME                      |
| 4.26E-11    | TME                      |
| 2.58E-09    | Metabolism               |
| 0.272610951 | Proliferation/Metastasis |
| 5.73E-12    | Metabolism               |
| 0.003760834 | Proliferation/Metastasis |
| 1.25E-10    | Metabolism               |
| 0.197612907 | Metabolism               |
| 0.947993978 | Metabolism               |
| 0.008153807 | Metabolism               |
| 2.80E-10    | Metabolism               |
| 0.00073103  | Metabolism               |

|             |                          |
|-------------|--------------------------|
| 0.881782528 | Metabolism               |
| 3.31E-06    | Metabolism               |
| 0.001885985 | Metabolism               |
| 1.24E-15    | Metabolism               |
| 1.45E-23    | Metabolism               |
| 1.15E-08    | Metabolism               |
| 0.327593833 | Metabolism               |
| 0.000532386 | Metabolism               |
| 1.20E-19    | TME                      |
| 0.010234139 | Proliferation/Metastasis |
| 0.005947794 | Metabolism               |
| 3.15E-15    | Proliferation/Metastasis |
| 8.22E-15    | TME                      |
| 1.02E-21    | Proliferation/Metastasis |
| 1.31E-22    | Proliferation/Metastasis |
| 3.40E-21    | TME                      |
| 6.16E-24    | TME                      |
| 0.030311197 | Metabolism               |
| 0.546168357 | Metabolism               |
| 1.59E-09    | Proliferation/Metastasis |
| 0.005537526 | Proliferation/Metastasis |
| 4.29E-17    | Proliferation/Metastasis |
| 0.044020335 | Metabolism               |
| 0.041450572 | Metabolism               |
| 8.97E-15    | Metabolism               |
| 1.33E-15    | Proliferation/Metastasis |
| 1.54E-20    | TME                      |
| 8.89E-21    | TME                      |
| 0.361078407 | Metabolism               |
| 0.000316571 | Proliferation/Metastasis |
| 0.013347801 | Metabolism               |
| 8.01E-13    | TME                      |
| 6.61E-10    | TME                      |
| 1.09E-06    | TME                      |
| 7.13E-14    | TME                      |
| 0.050920245 | Metabolism               |
| 3.92E-05    | TME                      |
| 0.000159824 | Proliferation/Metastasis |
| 1.64E-28    | TME                      |
| 0.187726308 | Proliferation/Metastasis |
| 2.07E-17    | Proliferation/Metastasis |
| 0.017761941 | Metabolism               |
| 0.310991454 | Proliferation/Metastasis |

|             |                          |
|-------------|--------------------------|
| 4.44E-19    | TME                      |
| 5.09E-12    | Metabolism               |
| 9.58E-05    | TME                      |
| 0.000106847 | TME                      |
| 0.163583982 | TME                      |
| 2.90E-19    | TME                      |
| 1.22E-15    | TME                      |
| 7.99E-11    | TME                      |
| 0.156576394 | Metabolism               |
| 9.58E-31    | TME                      |
| 8.54E-12    | Metabolism               |
| 0.20297041  | Metabolism               |
| 3.21E-18    | Proliferation/Metastasis |
| 0.666310657 | Proliferation/Metastasis |
| 0.07450952  | Metabolism               |
| 0.000350498 | Metabolism               |
| 0.210325186 | Metabolism               |
| 4.20E-11    | Metabolism               |
| 1.68E-17    | Proliferation/Metastasis |
| 0.000413958 | Proliferation/Metastasis |
| 1.15E-06    | Metabolism               |
| 0.027752297 | Metabolism               |
| 1.03E-07    | Metabolism               |
| 2.72E-07    | TME                      |
| 9.82E-06    | Metabolism               |
| 0.000107879 | Metabolism               |
| 2.69E-07    | Metabolism               |
| 0.068672525 | Metabolism               |
| 8.75E-15    | Proliferation/Metastasis |
| 9.48E-05    | Metabolism               |
| 2.14E-12    | Metabolism               |
| 0.149144726 | Metabolism               |
| 0.000105922 | Metabolism               |
| 3.28E-06    | Metabolism               |
| 1.71E-06    | Metabolism               |
| 2.17E-06    | Proliferation/Metastasis |
| 0.208750596 | Metabolism               |
| 6.73E-09    | Metabolism               |
| 0.160653779 | Proliferation/Metastasis |
| 1.70E-05    | Metabolism               |
| 4.76E-05    | Metabolism               |
| 1.20E-09    | Metabolism               |
| 0.013623231 | Metabolism               |

|             |                          |
|-------------|--------------------------|
| 9.42E-19    | Metabolism               |
| 0.413356687 | Metabolism               |
| 8.67E-05    | Metabolism               |
| 0.185851383 | Metabolism               |
| 4.51E-16    | TME                      |
| 1.68E-17    | TME                      |
| 3.17E-16    | TME                      |
| 8.12E-12    | TME                      |
| 7.00E-12    | TME                      |
| 0.023264653 | Metabolism               |
| 0.003539644 | Metabolism               |
| 0.163408294 | Proliferation/Metastasis |
| 0.076961974 | Metabolism               |
| 3.20E-16    | Proliferation/Metastasis |
| 2.62E-06    | Metabolism               |
| 0.272830246 | TME                      |
| 0.000524887 | Metabolism               |
| 0.000767718 | Metabolism               |
| 2.82E-08    | Metabolism               |
| 0.275572121 | Metabolism               |
| 1.14E-10    | TME                      |
| 0.588308626 | TME                      |
| 2.10E-05    | Proliferation/Metastasis |
| 0.002036631 | Metabolism               |
| 3.88E-09    | Proliferation/Metastasis |
| 4.81E-12    | Proliferation/Metastasis |
| 0.000139763 | TME                      |
| 0.85892258  | TME                      |
| 0.186862442 | TME                      |
| 0.037740882 | TME                      |
| 0.914721848 | Metabolism               |
| 0.286606611 | Proliferation/Metastasis |
| 0.616484847 | Metabolism               |
| 0.197826263 | Metabolism               |
| 0.030555872 | Proliferation/Metastasis |
| 0.000735696 | Proliferation/Metastasis |
| 0.249729735 | Metabolism               |
| 0.077032115 | Metabolism               |
| 0.186261877 | Metabolism               |
| 0.357078649 | Metabolism               |
| 0.002843279 | TME                      |
| 0.191245301 | TME                      |
| 0.850307875 | TME                      |

|             |                          |
|-------------|--------------------------|
| 0.405595348 | TME                      |
| 0.019610038 | TME                      |
| 0.03473267  | Metabolism               |
| 5.68E-05    | Metabolism               |
| 0.320779548 | Metabolism               |
| 0.011925415 | Metabolism               |
| 0.835893917 | Metabolism               |
| 0.000272964 | TME                      |
| 0.071523197 | TME                      |
| 0.547725625 | TME                      |
| 0.03103491  | TME                      |
| 0.094634938 | TME                      |
| 0.195537321 | TME                      |
| 0.143410253 | TME                      |
| 0.430850316 | TME                      |
| 0.073222952 | TME                      |
| 0.104710005 | Proliferation/Metastasis |
| 0.449891494 | Proliferation/Metastasis |
| 0.985327939 | Metabolism               |
| 0.63722378  | Metabolism               |
| 0.025912197 | TME                      |
| 0.919050989 | Metabolism               |
| 0.052162578 | Metabolism               |
| 0.293141992 | TME                      |
| 0.284520912 | Proliferation/Metastasis |
| 0.168980848 | Proliferation/Metastasis |
| 0.213182516 | TME                      |
| 0.889339264 | Metabolism               |
| 0.786835779 | Metabolism               |
| 0.27907197  | Proliferation/Metastasis |
| 3.50E-05    | Proliferation/Metastasis |
| 0.232539309 | TME                      |
| 0.59661146  | TME                      |
| 0.033569659 | TME                      |
| 0.134964095 | TME                      |
| 0.017525811 | Proliferation/Metastasis |
| 5.57E-05    | TME                      |
| 0.461851905 | TME                      |
| 0.548679301 | Metabolism               |
| 0.336680564 | TME                      |
| 0.424834569 | TME                      |
| 0.353975159 | TME                      |
| 0.004184744 | TME                      |

|             |                          |
|-------------|--------------------------|
| 0.226162209 | Metabolism               |
| 0.02503822  | Metabolism               |
| 0.702780666 | Metabolism               |
| 6.84E-05    | TME                      |
| 0.349084986 | Metabolism               |
| 0.625590528 | TME                      |
| 0.255594817 | TME                      |
| 0.148186638 | TME                      |
| 0.44679708  | TME                      |
| 0.04554415  | TME                      |
| 0.42748576  | Metabolism               |
| 0.093930841 | Proliferation/Metastasis |
| 0.095806695 | Metabolism               |
| 0.0005441   | Proliferation/Metastasis |
| 0.388481869 | Metabolism               |
| 0.660798335 | Metabolism               |
| 0.470048256 | Metabolism               |
| 0.8301672   | Metabolism               |
| 0.225767718 | Metabolism               |
| 4.56E-06    | Metabolism               |
| 0.003863633 | Metabolism               |
| 0.013422123 | Metabolism               |
| 0.843315077 | Metabolism               |
| 0.0026645   | Metabolism               |
| 0.001689843 | Metabolism               |
| 0.220459654 | Metabolism               |
| 0.308980836 | Metabolism               |
| 0.507069994 | Metabolism               |
| 0.228653488 | TME                      |
| 0.073239238 | Proliferation/Metastasis |
| 0.853886692 | Metabolism               |
| 0.018257749 | Proliferation/Metastasis |
| 0.057740101 | TME                      |
| 0.002672082 | Proliferation/Metastasis |
| 0.086239966 | Proliferation/Metastasis |
| 0.33487973  | TME                      |
| 0.066091801 | TME                      |
| 0.905435393 | Metabolism               |
| 0.38270659  | Metabolism               |
| 1.61E-05    | Proliferation/Metastasis |
| 0.74003974  | Proliferation/Metastasis |
| 0.000760947 | Proliferation/Metastasis |
| 0.962171156 | Metabolism               |

|             |                          |
|-------------|--------------------------|
| 0.065933433 | Metabolism               |
| 0.614521985 | Metabolism               |
| 0.10294725  | Proliferation/Metastasis |
| 0.560134106 | TME                      |
| 0.15081489  | TME                      |
| 0.188709921 | Metabolism               |
| 0.004845409 | Proliferation/Metastasis |
| 0.228103021 | Metabolism               |
| 0.2364087   | TME                      |
| 0.560238852 | TME                      |
| 6.56E-06    | TME                      |
| 0.002449337 | TME                      |
| 0.766415866 | Metabolism               |
| 0.755137888 | TME                      |
| 0.035048849 | Proliferation/Metastasis |
| 0.291138457 | TME                      |
| 0.284437162 | Proliferation/Metastasis |
| 0.065633192 | Proliferation/Metastasis |
| 0.010837668 | Metabolism               |
| 0.72568053  | Proliferation/Metastasis |
| 0.208061512 | TME                      |
| 0.002338664 | Metabolism               |
| 0.308995229 | TME                      |
| 0.589104123 | TME                      |
| 0.916497259 | TME                      |
| 0.108854413 | TME                      |
| 0.66995502  | TME                      |
| 0.096900719 | TME                      |
| 0.194379376 | Metabolism               |
| 0.18171407  | TME                      |
| 0.535309049 | Metabolism               |
| 0.783412705 | Metabolism               |
| 0.832492866 | Proliferation/Metastasis |
| 0.001516745 | Proliferation/Metastasis |
| 0.776690601 | Metabolism               |
| 0.552658721 | Metabolism               |
| 0.436088642 | Metabolism               |
| 0.748178476 | Metabolism               |
| 0.917868433 | Proliferation/Metastasis |
| 0.903442301 | Proliferation/Metastasis |
| 0.5596455   | Metabolism               |
| 0.991463381 | Metabolism               |
| 0.583170241 | Metabolism               |

|             |                          |
|-------------|--------------------------|
| 5.70E-05    | TME                      |
| 0.945978585 | Metabolism               |
| 0.162505732 | Metabolism               |
| 0.417975212 | Metabolism               |
| 0.853612474 | Metabolism               |
| 0.007856121 | Proliferation/Metastasis |
| 0.447475825 | Metabolism               |
| 0.781360906 | Metabolism               |
| 0.000407447 | Metabolism               |
| 0.219043314 | Metabolism               |
| 0.309324933 | Metabolism               |
| 0.257071016 | Metabolism               |
| 0.903184358 | Proliferation/Metastasis |
| 0.15843002  | Metabolism               |
| 0.089252021 | Metabolism               |
| 0.533352369 | Proliferation/Metastasis |
| 0.86950183  | Metabolism               |
| 0.060045739 | Metabolism               |
| 0.002723217 | Metabolism               |
| 0.671067435 | Metabolism               |
| 0.318963511 | Metabolism               |
| 0.176151012 | Metabolism               |
| 0.045527425 | Metabolism               |
| 0.157741914 | Metabolism               |
| 0.05672021  | TME                      |
| 0.315138931 | TME                      |
| 0.225664967 | TME                      |
| 0.119990555 | TME                      |
| 0.141808015 | TME                      |
| 0.049680167 | Metabolism               |
| 0.316364312 | Metabolism               |
| 7.57E-05    | Proliferation/Metastasis |
| 0.716136294 | Metabolism               |
| 0.311700017 | Proliferation/Metastasis |
| 0.547545342 | Metabolism               |
| 0.446799712 | TME                      |
| 0.409353624 | Metabolism               |
| 0.359251839 | Metabolism               |
| 0.618764312 | Metabolism               |
| 0.00128193  | Metabolism               |
| 0.005675313 | TME                      |
| 0.00019378  | TME                      |
| 0.041991815 | Proliferation/Metastasis |



|             |                          |
|-------------|--------------------------|
| 0.953791941 | Metabolism               |
| 0.002232064 | Proliferation/Metastasis |
| 0.152577448 | Proliferation/Metastasis |
| 0.001309529 | TME                      |
| 0.686265247 | TME                      |
| 0.116002105 | TME                      |
| 0.214864127 | TME                      |
| 0.05561627  | Metabolism               |
| 0.001043108 | Proliferation/Metastasis |
| 0.956220541 | Metabolism               |
| 0.002426333 | Metabolism               |
| 0.248180265 | Proliferation/Metastasis |
| 2.78E-06    | Proliferation/Metastasis |
| 0.004647897 | Metabolism               |
| 0.543746402 | Metabolism               |
| 0.569727537 | Metabolism               |
| 0.942188007 | Metabolism               |
| 0.26609756  | TME                      |
| 0.000149793 | TME                      |
| 0.531810837 | TME                      |
| 0.203519729 | TME                      |
| 1.04E-21    | TME                      |
| 0.037834058 | Metabolism               |
| 0.490796352 | Metabolism               |
| 8.03E-05    | Metabolism               |
| 2.05E-06    | Metabolism               |
| 0.026197358 | Metabolism               |
| 6.89E-06    | TME                      |
| 0.249429481 | TME                      |
| 0.034839752 | TME                      |
| 0.966807421 | TME                      |
| 0.025768656 | TME                      |
| 0.547899043 | TME                      |
| 0.302258737 | TME                      |
| 0.721854717 | TME                      |
| 0.397077152 | TME                      |
| 0.000299787 | Proliferation/Metastasis |
| 0.920651437 | Proliferation/Metastasis |
| 0.091938466 | Metabolism               |
| 0.237636223 | Metabolism               |
| 0.003336306 | TME                      |
| 0.554470929 | Metabolism               |
| 0.011455829 | Metabolism               |

|             |                          |
|-------------|--------------------------|
| 0.061880331 | TME                      |
| 0.131880972 | Proliferation/Metastasis |
| 0.415825107 | Proliferation/Metastasis |
| 0.642365769 | TME                      |
| 0.256297433 | Metabolism               |
| 0.000613759 | Metabolism               |
| 0.063712326 | Proliferation/Metastasis |
| 9.05E-07    | Proliferation/Metastasis |
| 0.749685172 | TME                      |
| 0.025579222 | TME                      |
| 0.930695023 | TME                      |
| 0.243782331 | TME                      |
| 0.092892398 | Proliferation/Metastasis |
| 0.014249807 | TME                      |
| 0.027768026 | TME                      |
| 0.039828648 | Metabolism               |
| 0.000174984 | TME                      |
| 9.31E-05    | TME                      |
| 0.814366552 | TME                      |
| 0.031245794 | TME                      |
| 0.004629088 | Metabolism               |
| 2.34E-08    | Metabolism               |
| 0.767649512 | Metabolism               |
| 0.000703962 | TME                      |
| 0.90819616  | Metabolism               |
| 0.596651418 | TME                      |
| 0.736816294 | TME                      |
| 0.09643147  | TME                      |
| 0.521698753 | TME                      |
| 0.544905558 | TME                      |
| 0.003499919 | Metabolism               |
| 0.012696697 | Proliferation/Metastasis |
| 1.69E-06    | Metabolism               |
| 1.02E-05    | Proliferation/Metastasis |
| 0.059186213 | Metabolism               |
| 0.439436334 | Metabolism               |
| 0.069887766 | Metabolism               |
| 8.31E-06    | Metabolism               |
| 5.04E-05    | Metabolism               |
| 9.50E-05    | Metabolism               |
| 0.919871764 | Metabolism               |
| 2.14E-08    | Metabolism               |
| 0.592290642 | Metabolism               |

|             |                          |
|-------------|--------------------------|
| 0.611818447 | Metabolism               |
| 0.00074314  | Metabolism               |
| 1.01E-09    | Metabolism               |
| 2.64E-05    | Metabolism               |
| 8.08E-05    | Metabolism               |
| 0.041928798 | TME                      |
| 0.071893035 | Proliferation/Metastasis |
| 0.544270481 | Metabolism               |
| 2.37E-13    | Proliferation/Metastasis |
| 0.879940901 | TME                      |
| 1.11E-05    | Proliferation/Metastasis |
| 0.000134144 | Proliferation/Metastasis |
| 3.61E-07    | TME                      |
| 0.007469527 | TME                      |
| 0.042397766 | Metabolism               |
| 0.435125394 | Metabolism               |
| 3.66E-09    | Proliferation/Metastasis |
| 0.873363193 | Proliferation/Metastasis |
| 1.24E-05    | Proliferation/Metastasis |
| 0.647522308 | Metabolism               |
| 4.32E-07    | Metabolism               |
| 9.08E-08    | Metabolism               |
| 0.627714441 | Proliferation/Metastasis |
| 0.013559205 | TME                      |
| 0.061297393 | TME                      |
| 0.000590273 | Metabolism               |
| 0.00382148  | Proliferation/Metastasis |
| 0.742835295 | Metabolism               |
| 0.49038651  | TME                      |
| 0.891139161 | TME                      |
| 9.35E-07    | TME                      |
| 0.000997293 | TME                      |
| 0.054102867 | Metabolism               |
| 9.11E-07    | TME                      |
| 3.26E-05    | Proliferation/Metastasis |
| 8.43E-06    | TME                      |
| 0.526545993 | Proliferation/Metastasis |
| 2.71E-05    | Proliferation/Metastasis |
| 0.000312646 | Metabolism               |
| 0.057401537 | Proliferation/Metastasis |
| 0.077842731 | TME                      |
| 0.473770534 | Metabolism               |
| 0.389846262 | TME                      |

|             |                          |
|-------------|--------------------------|
| 0.468783171 | TME                      |
| 0.1096774   | TME                      |
| 0.544114076 | TME                      |
| 0.01094137  | TME                      |
| 0.112495351 | TME                      |
| 5.84E-10    | Metabolism               |
| 6.41E-08    | TME                      |
| 0.408407473 | Metabolism               |
| 0.315162351 | Metabolism               |
| 0.00359465  | Proliferation/Metastasis |
| 9.58E-09    | Proliferation/Metastasis |
| 0.201462725 | Metabolism               |
| 0.002634428 | Metabolism               |
| 0.261404216 | Metabolism               |
| 0.907449196 | Metabolism               |
| 8.25E-08    | Proliferation/Metastasis |
| 1.17E-07    | Proliferation/Metastasis |
| 0.002545989 | Metabolism               |
| 0.268743315 | Metabolism               |
| 6.03E-05    | Metabolism               |
| 0.156556874 | TME                      |
| 0.301443679 | Metabolism               |
| 0.133261171 | Metabolism               |
| 0.028577884 | Metabolism               |
| 0.001613708 | Metabolism               |
| 6.90E-06    | Proliferation/Metastasis |
| 0.740265913 | Metabolism               |
| 0.000470678 | Metabolism               |
| 5.40E-09    | Metabolism               |
| 0.858540944 | Metabolism               |
| 0.11332424  | Metabolism               |
| 0.000241957 | Metabolism               |
| 0.000588568 | Proliferation/Metastasis |
| 0.31282901  | Metabolism               |
| 0.840281716 | Metabolism               |
| 0.000876928 | Proliferation/Metastasis |
| 1.06E-06    | Metabolism               |
| 0.094161136 | Metabolism               |
| 0.035316413 | Metabolism               |
| 0.006345224 | Metabolism               |
| 0.557495798 | Metabolism               |
| 0.009820285 | Metabolism               |
| 0.575594885 | Metabolism               |

|             |                          |
|-------------|--------------------------|
| 0.000186302 | Metabolism               |
| 0.776150106 | TME                      |
| 0.063255416 | TME                      |
| 0.067391151 | TME                      |
| 0.115276927 | TME                      |
| 0.130725868 | TME                      |
| 0.360490003 | Metabolism               |
| 0.521928706 | Metabolism               |
| 0.005570101 | Proliferation/Metastasis |
| 0.032255763 | Metabolism               |
| 4.00E-08    | Proliferation/Metastasis |
| 6.59E-06    | Metabolism               |
| 4.95E-08    | TME                      |
| 0.962187472 | Metabolism               |
| 0.118845068 | Metabolism               |
| 0.402406105 | Metabolism               |
| 5.89E-09    | Metabolism               |
| 0.545604435 | TME                      |
| 0.008583987 | TME                      |
| 3.42E-09    | Proliferation/Metastasis |
| 0.000259394 | Metabolism               |
| 5.69E-07    | Proliferation/Metastasis |
| 0.153331871 | Proliferation/Metastasis |
| 7.81E-05    | TME                      |
| 0.192895333 | TME                      |
| 0.005033099 | TME                      |
| 0.006020827 | TME                      |
| 0.680673796 | Metabolism               |
| 0.087043661 | Proliferation/Metastasis |
| 6.08E-05    | Metabolism               |
| 0.001244093 | Metabolism               |
| 0.958075638 | Proliferation/Metastasis |
| 0.000295678 | Proliferation/Metastasis |
| 1.14E-07    | Metabolism               |
| 0.706365131 | Metabolism               |
| 0.129712943 | Metabolism               |
| 8.31E-07    | Metabolism               |
| 0.271526699 | TME                      |
| 3.70E-06    | TME                      |
| 0.001357207 | TME                      |
| 0.404287717 | TME                      |
| 1.08E-10    | TME                      |
| 0.292943287 | Metabolism               |

|             |                          |
|-------------|--------------------------|
| 0.611355636 | Metabolism               |
| 0.027960761 | Metabolism               |
| 0.026574955 | Metabolism               |
| 2.77E-05    | Metabolism               |
| 2.29E-10    | TME                      |
| 3.18E-08    | TME                      |
| 0.012860208 | TME                      |
| 0.181498692 | TME                      |
| 0.011425541 | TME                      |
| 0.091965021 | TME                      |
| 0.05659719  | TME                      |
| 0.335428922 | TME                      |
| 0.752698107 | TME                      |
| 0.006125266 | Proliferation/Metastasis |
| 8.41E-06    | Proliferation/Metastasis |
| 0.170399963 | Metabolism               |
| 0.097731075 | Metabolism               |
| 0.000888508 | TME                      |
| 0.411868878 | Metabolism               |
| 0.901140629 | Metabolism               |
| 0.002642501 | TME                      |
| 0.009370368 | Proliferation/Metastasis |
| 0.785571696 | Proliferation/Metastasis |
| 0.604570673 | TME                      |
| 3.68E-07    | Metabolism               |
| 0.00128854  | Metabolism               |
| 0.063589356 | Proliferation/Metastasis |
| 1.73E-08    | Proliferation/Metastasis |
| 0.075640873 | TME                      |
| 0.005854023 | TME                      |
| 0.088613023 | TME                      |
| 0.02712503  | TME                      |
| 0.053934128 | Proliferation/Metastasis |
| 0.001024936 | TME                      |
| 0.000720737 | TME                      |
| 1.83E-10    | Metabolism               |
| 5.95E-07    | TME                      |
| 8.65E-09    | TME                      |
| 0.298657839 | TME                      |
| 0.1555147   | TME                      |
| 0.421940638 | Metabolism               |
| 0.09933071  | Metabolism               |
| 0.124452693 | Metabolism               |

|             |                          |
|-------------|--------------------------|
| 0.003796779 | TME                      |
| 0.001734116 | Metabolism               |
| 0.062557822 | TME                      |
| 0.203013528 | TME                      |
| 0.010108255 | TME                      |
| 0.934512775 | TME                      |
| 0.012876649 | TME                      |
| 0.013457384 | Metabolism               |
| 5.93E-05    | Proliferation/Metastasis |
| 0.003311952 | Metabolism               |
| 2.91E-07    | Proliferation/Metastasis |
| 0.052018938 | Metabolism               |
| 3.94E-05    | Metabolism               |
| 0.012667159 | Metabolism               |
| 5.46E-08    | Metabolism               |
| 5.44E-05    | Metabolism               |
| 0.354832586 | Metabolism               |
| 0.062166843 | Metabolism               |
| 6.35E-09    | Metabolism               |
| 0.09801337  | Metabolism               |
| 0.000187855 | Metabolism               |
| 0.043072785 | Metabolism               |
| 6.62E-10    | Metabolism               |
| 2.21E-06    | Metabolism               |
| 0.00010795  | Metabolism               |
| 0.001728761 | TME                      |
| 0.082711899 | Proliferation/Metastasis |
| 0.023121104 | Metabolism               |
| 4.17E-07    | Proliferation/Metastasis |
| 0.094896485 | TME                      |
| 1.12E-09    | Proliferation/Metastasis |
| 1.11E-09    | Proliferation/Metastasis |
| 1.40E-05    | TME                      |
| 0.000553758 | TME                      |
| 4.18E-05    | Metabolism               |
| 6.28E-05    | Metabolism               |
| 0.000101152 | Proliferation/Metastasis |
| 0.408111329 | Proliferation/Metastasis |
| 1.55E-10    | Proliferation/Metastasis |
| 5.02E-07    | Metabolism               |
| 0.000146012 | Metabolism               |
| 0.000399719 | Metabolism               |
| 0.260008232 | Proliferation/Metastasis |

|             |                          |
|-------------|--------------------------|
| 0.000164676 | TME                      |
| 0.095646979 | TME                      |
| 2.20E-13    | Metabolism               |
| 2.26E-07    | Proliferation/Metastasis |
| 6.84E-08    | Metabolism               |
| 0.032330799 | TME                      |
| 0.071545669 | TME                      |
| 0.007350063 | TME                      |
| 2.61E-05    | TME                      |
| 6.61E-06    | Metabolism               |
| 1.08E-07    | TME                      |
| 3.63E-12    | Proliferation/Metastasis |
| 1.01E-07    | TME                      |
| 0.777362398 | Proliferation/Metastasis |
| 4.35E-06    | Proliferation/Metastasis |
| 6.28E-27    | Metabolism               |
| 0.475026915 | Proliferation/Metastasis |
| 0.001957557 | TME                      |
| 0.253522349 | Metabolism               |
| 0.02874337  | TME                      |
| 0.057910012 | TME                      |
| 0.968449944 | TME                      |
| 0.086335604 | TME                      |
| 1.68E-05    | TME                      |
| 0.001729446 | TME                      |
| 4.09E-11    | Metabolism               |
| 9.81E-11    | TME                      |
| 0.148732808 | Metabolism               |
| 4.16E-05    | Metabolism               |
| 8.13E-10    | Proliferation/Metastasis |
| 4.12E-13    | Proliferation/Metastasis |
| 0.002320835 | Metabolism               |
| 0.001012932 | Metabolism               |
| 0.000677348 | Metabolism               |
| 3.43E-05    | Metabolism               |
| 6.69E-07    | Proliferation/Metastasis |
| 6.46E-16    | Proliferation/Metastasis |
| 0.002062422 | Metabolism               |
| 7.51E-08    | Metabolism               |
| 0.00735389  | Metabolism               |
| 0.587876932 | TME                      |
| 0.232745901 | Metabolism               |
| 0.00480116  | Metabolism               |



|             |                          |
|-------------|--------------------------|
| 0.003516956 | Metabolism               |
| 0.000208272 | Metabolism               |
| 6.53E-05    | Proliferation/Metastasis |
| 0.041904415 | Metabolism               |
| 0.00038824  | Metabolism               |
| 0.100028609 | Metabolism               |
| 0.667283949 | Metabolism               |
| 0.6641336   | Metabolism               |
| 0.034614769 | Metabolism               |
| 5.92E-05    | Proliferation/Metastasis |
| 3.05E-05    | Metabolism               |
| 0.872660043 | Metabolism               |
| 2.18E-09    | Proliferation/Metastasis |
| 0.264723358 | Metabolism               |
| 3.92E-06    | Metabolism               |
| 0.171741267 | Metabolism               |
| 0.047848985 | Metabolism               |
| 0.029906189 | Metabolism               |
| 8.60E-11    | Metabolism               |
| 3.31E-05    | Metabolism               |
| 0.363785235 | Metabolism               |
| 0.089221099 | TME                      |
| 0.000933131 | TME                      |
| 3.54E-06    | TME                      |
| 0.001202887 | TME                      |
| 0.018977939 | TME                      |
| 0.253111503 | Metabolism               |
| 0.57689744  | Metabolism               |
| 2.61E-08    | Proliferation/Metastasis |
| 0.18875255  | Metabolism               |
| 5.09E-16    | Proliferation/Metastasis |
| 0.082574825 | Metabolism               |
| 0.051819233 | TME                      |
| 0.499993355 | Metabolism               |
| 0.000668853 | Metabolism               |
| 0.136714201 | Metabolism               |
| 0.000407576 | Metabolism               |
| 0.447034021 | TME                      |
| 0.006189916 | TME                      |
| 3.49E-07    | Proliferation/Metastasis |
| 5.96E-10    | Metabolism               |
| 0.000461532 | Proliferation/Metastasis |
| 0.621400091 | Proliferation/Metastasis |

|             |                          |
|-------------|--------------------------|
| 5.61E-07    | TME                      |
| 0.064763603 | TME                      |
| 0.068891188 | TME                      |
| 0.313084448 | TME                      |
| 0.006723557 | Metabolism               |
| 8.94E-12    | Proliferation/Metastasis |
| 0.000770003 | Metabolism               |
| 1.68E-11    | Metabolism               |
| 0.028543264 | Proliferation/Metastasis |
| 0.866862047 | Proliferation/Metastasis |
| 0.00045535  | Metabolism               |
| 1.65E-08    | Metabolism               |
| 0.076868724 | Metabolism               |
| 0.002180021 | Metabolism               |
| 0.167820338 | TME                      |
| 0.826208698 | TME                      |
| 0.27088517  | TME                      |
| 0.025503896 | TME                      |
| 4.74E-10    | TME                      |
| 0.250752469 | Metabolism               |
| 0.010521219 | Metabolism               |
| 0.565058343 | Metabolism               |
| 0.632419235 | Metabolism               |
| 0.000180608 | Metabolism               |
| 0.624301837 | TME                      |
| 0.024158001 | TME                      |
| 0.04078022  | TME                      |
| 0.0062455   | TME                      |
| 0.036568018 | TME                      |
| 0.001114294 | TME                      |
| 0.003130706 | TME                      |
| 0.035012488 | TME                      |
| 0.001087598 | TME                      |
| 3.99E-07    | Proliferation/Metastasis |
| 0.002180913 | Proliferation/Metastasis |
| 0.001367468 | Metabolism               |
| 7.92E-07    | Metabolism               |
| 6.94E-10    | TME                      |
| 0.042243795 | Metabolism               |
| 5.75E-05    | Metabolism               |
| 0.07982503  | TME                      |
| 2.33E-08    | Proliferation/Metastasis |
| 5.45E-09    | Proliferation/Metastasis |

|             |                          |
|-------------|--------------------------|
| 0.089515811 | TME                      |
| 0.00286522  | Metabolism               |
| 2.13E-15    | Metabolism               |
| 5.00E-09    | Proliferation/Metastasis |
| 0.961338179 | Proliferation/Metastasis |
| 0.000137403 | TME                      |
| 0.014011    | TME                      |
| 0.001350703 | TME                      |
| 0.001501283 | TME                      |
| 0.001111274 | Proliferation/Metastasis |
| 0.161302784 | TME                      |
| 0.380539155 | TME                      |
| 0.058603226 | Metabolism               |
| 0.356030524 | TME                      |
| 0.54733828  | TME                      |
| 0.009520986 | TME                      |
| 0.176469944 | TME                      |
| 0.20783366  | Metabolism               |
| 0.667220963 | Metabolism               |
| 0.000835516 | Metabolism               |
| 0.024673165 | TME                      |
| 0.146865091 | Metabolism               |
| 0.026837453 | TME                      |
| 0.007391272 | TME                      |
| 0.085858151 | TME                      |
| 0.248806112 | TME                      |
| 0.08895856  | TME                      |
| 2.22E-10    | Metabolism               |
| 6.00E-09    | Proliferation/Metastasis |
| 2.22E-05    | Metabolism               |
| 0.295347921 | Proliferation/Metastasis |
| 3.43E-10    | Metabolism               |
| 0.001011495 | Metabolism               |
| 0.002668987 | Metabolism               |
| 0.220785124 | Metabolism               |
| 1.67E-10    | Metabolism               |
| 0.356612893 | Metabolism               |
| 4.53E-06    | Metabolism               |
| 3.64E-06    | Metabolism               |
| 0.589489625 | Metabolism               |
| 9.51E-06    | Metabolism               |
| 0.728858151 | Metabolism               |
| 1.36E-06    | Metabolism               |

|             |                          |
|-------------|--------------------------|
| 0.622887278 | Metabolism               |
| 0.003808213 | Metabolism               |
| 0.239503836 | TME                      |
| 4.74E-06    | Proliferation/Metastasis |
| 0.039962924 | Metabolism               |
| 0.001912805 | Proliferation/Metastasis |
| 0.005029389 | TME                      |
| 0.265389191 | Proliferation/Metastasis |
| 0.841275652 | Proliferation/Metastasis |
| 0.458789142 | TME                      |
| 0.340174388 | TME                      |
| 0.000111481 | Metabolism               |
| 0.000355166 | Metabolism               |
| 2.13E-05    | Proliferation/Metastasis |
| 1.38E-09    | Proliferation/Metastasis |
| 0.976475555 | Proliferation/Metastasis |
| 0.00125866  | Metabolism               |
| 0.800972188 | Metabolism               |
| 0.287591466 | Metabolism               |
| 0.07965472  | Proliferation/Metastasis |
| 0.583708635 | TME                      |
| 0.020956416 | TME                      |
| 0.01248113  | Metabolism               |
| 0.088060877 | Proliferation/Metastasis |
| 0.037303705 | Metabolism               |
| 0.053959054 | TME                      |
| 0.06658704  | TME                      |
| 0.959784417 | TME                      |
| 0.22247925  | TME                      |
| 1.56E-05    | Metabolism               |
| 1.12E-07    | TME                      |
| 0.079629232 | Proliferation/Metastasis |
| 0.196286963 | TME                      |
| 0.000106584 | Proliferation/Metastasis |
| 1.54E-17    | Proliferation/Metastasis |
| 0.000179959 | Metabolism               |
| 2.95E-15    | Proliferation/Metastasis |
| 0.025367767 | TME                      |
| 0.005280224 | Metabolism               |
| 0.500535005 | TME                      |
| 0.000271818 | TME                      |
| 2.35E-08    | TME                      |
| 0.004674536 | TME                      |

|             |                          |
|-------------|--------------------------|
| 0.000397846 | TME                      |
| 0.007847731 | TME                      |
| 2.61E-05    | Metabolism               |
| 0.004979135 | TME                      |
| 0.57312841  | Metabolism               |
| 0.002657081 | Metabolism               |
| 0.391336563 | Proliferation/Metastasis |
| 8.88E-09    | Proliferation/Metastasis |
| 4.68E-11    | Metabolism               |
| 0.357690501 | Metabolism               |
| 0.179831045 | Metabolism               |
| 4.62E-06    | Metabolism               |
| 1.09E-09    | Proliferation/Metastasis |
| 1.08E-11    | Proliferation/Metastasis |
| 0.385089641 | Metabolism               |
| 2.58E-05    | Metabolism               |
| 1.54E-10    | Metabolism               |
| 0.002446367 | TME                      |
| 0.02014759  | Metabolism               |
| 0.773400528 | Metabolism               |
| 0.017871756 | Metabolism               |
| 0.055110776 | Metabolism               |
| 7.91E-05    | Proliferation/Metastasis |
| 1.48E-07    | Metabolism               |
| 9.65E-05    | Metabolism               |
| 0.652773677 | Metabolism               |
| 1.06E-13    | Metabolism               |
| 1.65E-14    | Metabolism               |
| 0.00680486  | Metabolism               |
| 0.800123118 | Proliferation/Metastasis |
| 0.154969799 | Metabolism               |
| 1.22E-10    | Metabolism               |
| 0.423505916 | Proliferation/Metastasis |
| 0.715816675 | Metabolism               |
| 0.650686388 | Metabolism               |
| 0.220826544 | Metabolism               |
| 0.625752518 | Metabolism               |
| 3.33E-08    | Metabolism               |
| 3.09E-05    | Metabolism               |
| 6.07E-05    | Metabolism               |
| 0.244960145 | Metabolism               |
| 0.000779252 | TME                      |
| 0.134635871 | TME                      |

|             |                          |
|-------------|--------------------------|
| 0.864864788 | TME                      |
| 0.235795089 | TME                      |
| 0.027946793 | TME                      |
| 0.852322368 | Metabolism               |
| 1.02E-09    | Metabolism               |
| 0.102901115 | Proliferation/Metastasis |
| 0.000828536 | Metabolism               |
| 0.000661463 | Proliferation/Metastasis |
| 0.032958451 | Metabolism               |
| 0.000169981 | TME                      |
| 0.432735991 | Metabolism               |
| 0.076438406 | Metabolism               |
| 0.07580544  | Metabolism               |
| 0.572174424 | Metabolism               |
| 0.006444351 | TME                      |
| 0.230899957 | TME                      |
| 0.494829645 | Proliferation/Metastasis |
| 0.138088173 | Metabolism               |
| 1.13E-06    | Proliferation/Metastasis |
| 0.291947881 | Proliferation/Metastasis |
| 0.000229672 | TME                      |
| 3.97E-06    | TME                      |
| 1.27E-11    | TME                      |
| 4.12E-09    | TME                      |
| 0.888175871 | Metabolism               |
| 0.388899781 | Proliferation/Metastasis |
| 0.137061956 | Metabolism               |
| 0.470124375 | Metabolism               |
| 8.78E-10    | Proliferation/Metastasis |
| 5.11E-09    | Proliferation/Metastasis |
| 0.001048452 | Metabolism               |
| 0.158617017 | Metabolism               |
| 0.473908043 | Metabolism               |
| 0.00887837  | Metabolism               |
| 0.000687903 | TME                      |
| 3.00E-14    | TME                      |
| 6.95E-11    | TME                      |
| 3.85E-06    | TME                      |
| 0.966861292 | TME                      |
| 9.24E-08    | Metabolism               |
| 0.31892355  | Metabolism               |
| 0.724416531 | Metabolism               |
| 0.707417882 | Metabolism               |

|             |                          |
|-------------|--------------------------|
| 0.484566955 | Metabolism               |
| 3.61E-22    | TME                      |
| 1.19E-17    | TME                      |
| 2.25E-13    | TME                      |
| 2.52E-07    | TME                      |
| 3.18E-11    | TME                      |
| 7.18E-13    | TME                      |
| 2.24E-13    | TME                      |
| 2.39E-08    | TME                      |
| 1.96E-09    | TME                      |
| 0.221178025 | Proliferation/Metastasis |
| 0.028766687 | Proliferation/Metastasis |
| 0.451862774 | Metabolism               |
| 0.901972269 | Metabolism               |
| 8.03E-05    | TME                      |
| 0.011089458 | Metabolism               |
| 0.034116269 | Metabolism               |
| 4.37E-12    | TME                      |
| 6.30E-14    | Proliferation/Metastasis |
| 9.11E-05    | Proliferation/Metastasis |
| 0.008427315 | TME                      |
| 3.25E-05    | Metabolism               |
| 0.031210858 | Metabolism               |
| 0.029950211 | Proliferation/Metastasis |
| 1.00E-10    | Proliferation/Metastasis |
| 8.42E-13    | TME                      |
| 4.28E-12    | TME                      |
| 7.87E-13    | TME                      |
| 4.32E-16    | TME                      |
| 3.50E-05    | Proliferation/Metastasis |
| 1.65E-19    | TME                      |
| 6.99E-14    | TME                      |
| 1.78E-05    | Metabolism               |
| 1.07E-14    | TME                      |
| 8.97E-13    | TME                      |
| 2.90E-08    | TME                      |
| 0.116450493 | TME                      |
| 0.738218456 | Metabolism               |
| 0.00503961  | Metabolism               |
| 0.862179528 | Metabolism               |
| 2.24E-14    | TME                      |
| 0.095395645 | Metabolism               |
| 9.23E-08    | TME                      |

|             |                          |
|-------------|--------------------------|
| 1.58E-05    | TME                      |
| 5.19E-10    | TME                      |
| 0.132750691 | TME                      |
| 1.37E-05    | TME                      |
| 0.000455397 | Metabolism               |
| 0.954731614 | Proliferation/Metastasis |
| 0.558042352 | Metabolism               |
| 5.32E-16    | Proliferation/Metastasis |
| 0.190379689 | Metabolism               |
| 0.268033976 | Metabolism               |
| 2.83E-06    | Metabolism               |
| 0.982555414 | Metabolism               |
| 0.704310787 | Metabolism               |
| 0.598560704 | Metabolism               |
| 0.002700018 | Metabolism               |
| 0.000853235 | Metabolism               |
| 0.475344909 | Metabolism               |
| 2.29E-05    | Metabolism               |
| 3.17E-06    | Metabolism               |
| 0.00043912  | Metabolism               |
| 1.41E-05    | Metabolism               |
| 0.001596626 | Metabolism               |
| 1.83E-15    | TME                      |
| 1.34E-08    | Proliferation/Metastasis |
| 6.88E-08    | Metabolism               |
| 0.075796694 | Proliferation/Metastasis |
| 1.70E-11    | TME                      |
| 1.02E-14    | Proliferation/Metastasis |
| 2.10E-16    | Proliferation/Metastasis |
| 6.48E-10    | TME                      |
| 3.09E-07    | TME                      |
| 2.00E-10    | Metabolism               |
| 1.88E-20    | Metabolism               |
| 0.000239462 | Proliferation/Metastasis |
| 1.44E-05    | Proliferation/Metastasis |
| 2.08E-19    | Proliferation/Metastasis |
| 0.017522552 | Metabolism               |
| 0.001966293 | Metabolism               |
| 0.253723133 | Metabolism               |
| 0.122343687 | Proliferation/Metastasis |
| 1.14E-15    | TME                      |
| 7.90E-14    | TME                      |
| 3.95E-06    | Metabolism               |



|             |                          |
|-------------|--------------------------|
| 7.16E-12    | Proliferation/Metastasis |
| 5.91E-15    | Metabolism               |
| 3.58E-11    | TME                      |
| 1.05E-07    | TME                      |
| 4.39E-08    | TME                      |
| 7.29E-19    | TME                      |
| 0.010101681 | Metabolism               |
| 0.834047791 | TME                      |
| 0.000187826 | Proliferation/Metastasis |
| 6.56E-10    | TME                      |
| 0.000604726 | Proliferation/Metastasis |
| 0.893510423 | Proliferation/Metastasis |
| 5.81E-12    | Metabolism               |
| 0.000911388 | Proliferation/Metastasis |
| 6.98E-17    | TME                      |
| 0.083005067 | Metabolism               |
| 4.42E-05    | TME                      |
| 1.13E-15    | TME                      |
| 2.41E-06    | TME                      |
| 1.15E-13    | TME                      |
| 0.183458793 | TME                      |
| 1.66E-14    | TME                      |
| 0.081882699 | Metabolism               |
| 6.22E-11    | TME                      |
| 0.000954047 | Metabolism               |
| 0.001054893 | Metabolism               |
| 5.85E-13    | Proliferation/Metastasis |
| 0.005676151 | Proliferation/Metastasis |
| 0.913325271 | Metabolism               |
| 3.54E-08    | Metabolism               |
| 2.73E-07    | Metabolism               |
| 4.46E-10    | Metabolism               |
| 0.04755949  | Proliferation/Metastasis |
| 0.419779994 | Proliferation/Metastasis |
| 0.202863319 | Metabolism               |
| 0.078404693 | Metabolism               |
| 0.036771199 | Metabolism               |
| 2.78E-12    | TME                      |
| 0.68890865  | Metabolism               |
| 0.009180116 | Metabolism               |
| 0.015797091 | Metabolism               |
| 4.45E-13    | Metabolism               |
| 0.045187065 | Proliferation/Metastasis |

|             |                          |
|-------------|--------------------------|
| 0.470916586 | Metabolism               |
| 0.001330677 | Metabolism               |
| 0.010664975 | Metabolism               |
| 0.032498452 | Metabolism               |
| 7.79E-08    | Metabolism               |
| 0.082001085 | Metabolism               |
| 0.00242228  | Proliferation/Metastasis |
| 0.013385701 | Metabolism               |
| 0.157545083 | Metabolism               |
| 1.16E-12    | Proliferation/Metastasis |
| 3.99E-05    | Metabolism               |
| 1.67E-14    | Metabolism               |
| 0.000124544 | Metabolism               |
| 7.49E-06    | Metabolism               |
| 0.187141271 | Metabolism               |
| 0.011405929 | Metabolism               |
| 0.44820449  | Metabolism               |
| 0.445168528 | Metabolism               |
| 2.56E-12    | TME                      |
| 7.19E-13    | TME                      |
| 4.47E-11    | TME                      |
| 3.54E-11    | TME                      |
| 9.43E-09    | TME                      |
| 0.779055742 | Metabolism               |
| 0.018293134 | Metabolism               |
| 3.77E-24    | Proliferation/Metastasis |
| 0.089843876 | Metabolism               |
| 3.42E-06    | Proliferation/Metastasis |
| 8.88E-06    | Metabolism               |
| 0.900421067 | TME                      |
| 0.871226109 | Metabolism               |
| 0.006084308 | Metabolism               |
| 0.124370427 | Metabolism               |
| 0.314441383 | Metabolism               |
| 2.04E-09    | TME                      |
| 3.28E-08    | TME                      |
| 0.000302774 | Proliferation/Metastasis |
| 0.004957218 | Metabolism               |
| 0.002971525 | Proliferation/Metastasis |
| 0.423772243 | Proliferation/Metastasis |
| 0.000656701 | TME                      |
| 0.182117419 | TME                      |
| 0.131666554 | TME                      |

|             |                          |
|-------------|--------------------------|
| 0.164647594 | TME                      |
| 0.001314304 | Metabolism               |
| 3.05E-07    | Proliferation/Metastasis |
| 0.735584375 | Metabolism               |
| 2.57E-06    | Metabolism               |
| 0.35890094  | Proliferation/Metastasis |
| 0.00341814  | Proliferation/Metastasis |
| 0.014259474 | Metabolism               |
| 0.597970916 | Metabolism               |
| 0.206815164 | Metabolism               |
| 0.064412422 | Metabolism               |
| 0.877159719 | TME                      |
| 0.022272285 | TME                      |
| 0.555294391 | TME                      |
| 0.630221812 | TME                      |
| 7.92E-13    | TME                      |
| 0.002746188 | Metabolism               |
| 0.18548213  | Metabolism               |
| 0.000341371 | Metabolism               |
| 0.000109344 | Metabolism               |
| 0.911830949 | Metabolism               |
| 0.055211712 | TME                      |
| 0.983983608 | TME                      |
| 0.167154372 | TME                      |
| 0.816638891 | TME                      |
| 0.00778359  | TME                      |
| 0.729562638 | TME                      |
| 0.446531945 | TME                      |
| 0.701921254 | TME                      |
| 0.321730523 | TME                      |
| 0.022953065 | Proliferation/Metastasis |
| 0.001852941 | Proliferation/Metastasis |
| 0.2843614   | Metabolism               |
| 0.580681856 | Metabolism               |
| 0.022861285 | TME                      |
| 0.009392163 | Metabolism               |
| 1.12E-06    | Metabolism               |
| 0.026222687 | TME                      |
| 1.03E-05    | Proliferation/Metastasis |
| 0.002681134 | Proliferation/Metastasis |
| 0.530611739 | TME                      |
| 0.643267596 | Metabolism               |
| 6.79E-05    | Metabolism               |

|             |                          |
|-------------|--------------------------|
| 0.052618451 | Proliferation/Metastasis |
| 0.007903735 | Proliferation/Metastasis |
| 0.602646836 | TME                      |
| 0.039239502 | TME                      |
| 0.816002874 | TME                      |
| 0.47835103  | TME                      |
| 0.0014905   | Proliferation/Metastasis |
| 0.218526639 | TME                      |
| 0.012268135 | TME                      |
| 0.356744954 | Metabolism               |
| 0.054762562 | TME                      |
| 0.002542238 | TME                      |
| 0.388583059 | TME                      |
| 0.530377877 | TME                      |
| 0.006969075 | Metabolism               |
| 3.57E-06    | Metabolism               |
| 0.714994491 | Metabolism               |
| 0.059214752 | TME                      |
| 0.374118108 | Metabolism               |
| 0.525811489 | TME                      |
| 0.813646757 | TME                      |
| 0.24967141  | TME                      |
| 0.006314473 | TME                      |
| 0.331223464 | TME                      |
| 1.24E-05    | Metabolism               |
| 0.382920622 | Proliferation/Metastasis |
| 1.07E-08    | Metabolism               |
| 0.8341637   | Proliferation/Metastasis |
| 0.00059826  | Metabolism               |
| 0.408141636 | Metabolism               |
| 0.002255163 | Metabolism               |
| 0.277401561 | Metabolism               |
| 0.000998843 | Metabolism               |
| 6.05E-08    | Metabolism               |
| 0.398120163 | Metabolism               |
| 5.46E-07    | Metabolism               |
| 0.000371454 | Metabolism               |
| 0.855037894 | Metabolism               |
| 0.01200704  | Metabolism               |
| 0.007579665 | Metabolism               |
| 0.010082299 | Metabolism               |
| 0.256238232 | Metabolism               |
| 0.036982935 | TME                      |

|             |                          |
|-------------|--------------------------|
| 0.224753514 | Proliferation/Metastasis |
| 0.085567693 | Metabolism               |
| 1.44E-13    | Proliferation/Metastasis |
| 0.62965046  | TME                      |
| 0.000271619 | Proliferation/Metastasis |
| 0.003719926 | Proliferation/Metastasis |
| 0.000621975 | TME                      |
| 0.000824971 | TME                      |
| 7.76E-08    | Metabolism               |
| 0.003265259 | Metabolism               |
| 0.000322182 | Proliferation/Metastasis |
| 0.050168014 | Proliferation/Metastasis |
| 0.037052926 | Proliferation/Metastasis |
| 0.657581581 | Metabolism               |
| 0.001979986 | Metabolism               |
| 3.09E-07    | Metabolism               |
| 0.000159366 | Proliferation/Metastasis |
| 0.028371658 | TME                      |
| 0.035018589 | TME                      |
| 0.644033829 | Metabolism               |
| 0.28417668  | Proliferation/Metastasis |
| 0.032418316 | Metabolism               |
| 0.786045981 | TME                      |
| 0.653652498 | TME                      |
| 1.17E-05    | TME                      |
| 0.045878243 | TME                      |
| 0.553755402 | Metabolism               |
| 0.162889072 | TME                      |
| 0.258443767 | Proliferation/Metastasis |
| 4.65E-07    | TME                      |
| 0.077294144 | Proliferation/Metastasis |
| 0.00014761  | Proliferation/Metastasis |
| 0.267258328 | Metabolism               |
| 0.002454707 | Proliferation/Metastasis |
| 0.145126645 | TME                      |
| 0.256772743 | Metabolism               |
| 0.64037591  | TME                      |
| 0.311518459 | TME                      |
| 0.176740972 | TME                      |
| 0.620130777 | TME                      |
| 0.000308516 | TME                      |
| 0.410243569 | TME                      |
| 7.73E-10    | Metabolism               |

|             |                          |
|-------------|--------------------------|
| 2.09E-07    | TME                      |
| 0.326134458 | Metabolism               |
| 0.405438496 | Metabolism               |
| 0.025097262 | Proliferation/Metastasis |
| 1.90E-05    | Proliferation/Metastasis |
| 0.341823691 | Metabolism               |
| 0.001099995 | Metabolism               |
| 2.32E-05    | Metabolism               |
| 0.001430503 | Metabolism               |
| 2.22E-19    | Proliferation/Metastasis |
| 0.000194067 | Proliferation/Metastasis |
| 0.05533424  | Metabolism               |
| 0.601287934 | Metabolism               |
| 3.14E-06    | Metabolism               |
| 0.241217389 | TME                      |
| 0.004635506 | Metabolism               |
| 0.84732456  | Metabolism               |
| 0.674420192 | Metabolism               |
| 0.232959008 | Metabolism               |
| 0.000272096 | Proliferation/Metastasis |
| 0.587166511 | Metabolism               |
| 0.000117548 | Metabolism               |
| 1.08E-10    | Metabolism               |
| 0.238319259 | Metabolism               |
| 0.000366958 | Metabolism               |
| 0.01250044  | Metabolism               |
| 0.454986272 | Proliferation/Metastasis |
| 0.434133767 | Metabolism               |
| 0.053782973 | Metabolism               |
| 0.96231613  | Proliferation/Metastasis |
| 1.42E-13    | Metabolism               |
| 0.000470346 | Metabolism               |
| 0.000698652 | Metabolism               |
| 0.01498346  | Metabolism               |
| 0.021991854 | Metabolism               |
| 0.497750427 | Metabolism               |
| 0.002948137 | Metabolism               |
| 0.082251934 | Metabolism               |
| 0.867304776 | TME                      |
| 0.132292635 | TME                      |
| 0.043373844 | TME                      |
| 0.157830406 | TME                      |
| 0.238914377 | TME                      |

|             |                          |
|-------------|--------------------------|
| 0.142149155 | Metabolism               |
| 0.744279488 | Metabolism               |
| 0.048384253 | Proliferation/Metastasis |
| 0.995090865 | Metabolism               |
| 4.01E-08    | Proliferation/Metastasis |
| 0.009573519 | Metabolism               |
| 0.001874298 | TME                      |
| 0.595078515 | Metabolism               |
| 0.319935882 | Metabolism               |
| 8.55E-05    | Metabolism               |
| 6.84E-08    | Metabolism               |
| 0.289776105 | TME                      |
| 0.555900828 | TME                      |
| 0.000859277 | Proliferation/Metastasis |
| 0.094679054 | Metabolism               |
| 0.019071144 | Proliferation/Metastasis |
| 0.021154895 | Proliferation/Metastasis |
| 0.938643646 | TME                      |
| 0.105180447 | TME                      |
| 0.027122395 | TME                      |
| 0.004935192 | TME                      |
| 0.39951304  | Metabolism               |
| 0.002211133 | Proliferation/Metastasis |
| 0.294664961 | Metabolism               |
| 0.009370663 | Metabolism               |
| 0.880335885 | Proliferation/Metastasis |
| 0.120112908 | Proliferation/Metastasis |
| 0.014248334 | Metabolism               |
| 0.00620804  | Metabolism               |
| 0.00283756  | Metabolism               |
| 0.022700781 | Metabolism               |
| 0.081142613 | TME                      |
| 0.001526345 | TME                      |
| 0.004210427 | TME                      |
| 0.25533542  | TME                      |
| 0.005807886 | TME                      |
| 0.027599336 | Metabolism               |
| 0.054664623 | Metabolism               |
| 0.19304334  | Metabolism               |
| 0.383395577 | Metabolism               |
| 0.207024963 | Metabolism               |
| 0.001176677 | TME                      |
| 0.000231524 | TME                      |

|             |                          |
|-------------|--------------------------|
| 0.013518966 | TME                      |
| 0.090493159 | TME                      |
| 0.058591023 | TME                      |
| 0.040095835 | TME                      |
| 0.027325725 | TME                      |
| 0.013389358 | TME                      |
| 0.058802634 | TME                      |
| 0.063359741 | Proliferation/Metastasis |
| 0.070553088 | Proliferation/Metastasis |
| 0.405754729 | Metabolism               |
| 0.004577007 | Metabolism               |
| 0.843119717 | TME                      |
| 0.020700196 | Metabolism               |
| 0.990990426 | Metabolism               |
| 0.024675342 | TME                      |
| 0.863124026 | Proliferation/Metastasis |
| 0.123081299 | Proliferation/Metastasis |
| 0.169935292 | TME                      |
| 0.013954444 | Metabolism               |
| 0.07919986  | Metabolism               |
| 0.10444186  | Proliferation/Metastasis |
| 0.003954894 | Proliferation/Metastasis |
| 0.085208023 | TME                      |
| 0.049708527 | TME                      |
| 0.061845906 | TME                      |
| 0.074323196 | TME                      |
| 0.004118455 | Proliferation/Metastasis |
| 0.028669303 | TME                      |
| 0.028758595 | TME                      |
| 0.288495073 | Metabolism               |
| 0.00608798  | TME                      |
| 0.00348732  | TME                      |
| 0.029349953 | TME                      |
| 0.656369885 | TME                      |
| 0.853970689 | Metabolism               |
| 0.134551863 | Metabolism               |
| 0.445134665 | Metabolism               |
| 0.050466082 | TME                      |
| 0.74490623  | Metabolism               |
| 0.045645742 | TME                      |
| 0.211450146 | TME                      |
| 0.0113117   | TME                      |
| 0.010437205 | TME                      |



|             |                          |
|-------------|--------------------------|
| 0.255276021 | TME                      |
| 0.041354057 | Metabolism               |
| 0.011282705 | Proliferation/Metastasis |
| 0.00068341  | Metabolism               |
| 0.006592713 | Proliferation/Metastasis |
| 0.028082072 | Metabolism               |
| 0.009277869 | Metabolism               |
| 0.788474189 | Metabolism               |
| 0.79197273  | Metabolism               |
| 0.001710852 | Metabolism               |
| 0.833493189 | Metabolism               |
| 0.51406131  | Metabolism               |
| 0.000840587 | Metabolism               |
| 0.784802207 | Metabolism               |
| 0.724311213 | Metabolism               |
| 0.580749475 | Metabolism               |
| 0.011541554 | Metabolism               |
| 0.223357686 | Metabolism               |
| 0.89369083  | Metabolism               |
| 0.019114013 | TME                      |
| 0.367708327 | Proliferation/Metastasis |
| 0.003562103 | Metabolism               |
| 0.051042434 | Proliferation/Metastasis |
| 0.026148573 | TME                      |
| 0.000125935 | Proliferation/Metastasis |
| 0.000793565 | Proliferation/Metastasis |
| 0.030139354 | TME                      |
| 0.055632296 | TME                      |
| 0.117817968 | Metabolism               |
| 0.111408147 | Metabolism               |
| 0.009867059 | Proliferation/Metastasis |
| 0.203502817 | Proliferation/Metastasis |
| 0.009438874 | Proliferation/Metastasis |
| 0.405868823 | Metabolism               |
| 0.238630731 | Metabolism               |
| 0.383451743 | Metabolism               |
| 0.994485844 | Proliferation/Metastasis |
| 0.007489505 | TME                      |
| 0.288160896 | TME                      |
| 0.003742485 | Metabolism               |
| 0.069742394 | Proliferation/Metastasis |
| 0.065698125 | Metabolism               |
| 0.040808747 | TME                      |

|             |                          |
|-------------|--------------------------|
| 0.142918935 | TME                      |
| 0.190190022 | TME                      |
| 0.021419482 | TME                      |
| 0.017664897 | Metabolism               |
| 0.000265479 | TME                      |
| 0.002847219 | Proliferation/Metastasis |
| 0.005033917 | TME                      |
| 0.840483259 | Proliferation/Metastasis |
| 0.004642093 | Proliferation/Metastasis |
| 5.06E-06    | Metabolism               |
| 0.054544892 | Proliferation/Metastasis |
| 0.02245812  | TME                      |
| 0.019563199 | Metabolism               |
| 0.056632335 | TME                      |
| 0.092654815 | TME                      |
| 0.935741161 | TME                      |
| 0.029381364 | TME                      |
| 0.002381865 | TME                      |
| 0.038204845 | TME                      |
| 0.003613611 | Metabolism               |
| 0.002528682 | TME                      |
| 0.053287333 | Metabolism               |
| 0.006320375 | Metabolism               |
| 0.053143707 | Proliferation/Metastasis |
| 0.001270571 | Proliferation/Metastasis |
| 0.001965047 | Metabolism               |
| 0.242816078 | Metabolism               |
| 0.09497219  | Metabolism               |
| 0.629968981 | Metabolism               |
| 0.009255871 | Proliferation/Metastasis |
| 0.004523108 | Proliferation/Metastasis |
| 0.744877163 | Metabolism               |
| 0.060226497 | Metabolism               |
| 0.044957862 | Metabolism               |
| 0.236418752 | TME                      |
| 0.112606421 | Metabolism               |
| 0.267033491 | Metabolism               |
| 0.138049475 | Metabolism               |
| 0.023525843 | Metabolism               |
| 0.001899961 | Proliferation/Metastasis |
| 0.069971582 | Metabolism               |
| 0.117512516 | Metabolism               |
| 0.403672016 | Metabolism               |

|             |                          |
|-------------|--------------------------|
| 0.014116736 | Metabolism               |
| 0.356910349 | Metabolism               |
| 0.574874884 | Metabolism               |
| 0.292369476 | Proliferation/Metastasis |
| 0.271165734 | Metabolism               |
| 0.059759453 | Metabolism               |
| 0.174217627 | Proliferation/Metastasis |
| 0.058982799 | Metabolism               |
| 0.030557131 | Metabolism               |
| 0.150676043 | Metabolism               |
| 0.113598458 | Metabolism               |
| 0.63597022  | Metabolism               |
| 0.041596197 | Metabolism               |
| 0.102428422 | Metabolism               |
| 0.407740543 | Metabolism               |
| 0.065027441 | TME                      |
| 0.003936127 | TME                      |
| 0.014095587 | TME                      |
| 0.00902125  | TME                      |
| 0.016581216 | TME                      |
| 0.597837438 | Metabolism               |
| 0.61991123  | Metabolism               |
| 0.049609318 | Proliferation/Metastasis |
| 0.325854486 | Metabolism               |
| 0.005636205 | Proliferation/Metastasis |
| 0.641649637 | Metabolism               |
| 0.527411215 | TME                      |
| 0.42732855  | Metabolism               |
| 0.478051251 | Metabolism               |
| 0.503917232 | Metabolism               |
| 0.793660206 | Metabolism               |
| 0.386775362 | TME                      |
| 0.043589381 | TME                      |
| 0.018975421 | Proliferation/Metastasis |
| 0.271491772 | Metabolism               |
| 0.008939188 | Proliferation/Metastasis |
| 0.451643338 | Proliferation/Metastasis |
| 0.222870645 | TME                      |
| 0.001320749 | TME                      |
| 0.150128627 | TME                      |
| 0.0025441   | TME                      |
| 0.010586101 | Metabolism               |
| 0.019141781 | Proliferation/Metastasis |

|             |                          |
|-------------|--------------------------|
| 0.296300334 | Metabolism               |
| 0.339874554 | Metabolism               |
| 0.512917589 | Proliferation/Metastasis |
| 2.16E-15    | Proliferation/Metastasis |
| 1.52E-09    | Metabolism               |
| 0.112001093 | Metabolism               |
| 0.001581006 | Metabolism               |
| 7.40E-05    | Metabolism               |
| 0.621176599 | TME                      |
| 1.66E-07    | TME                      |
| 3.91E-06    | TME                      |
| 0.007507464 | TME                      |
| 2.94E-22    | TME                      |
| 0.15330555  | Metabolism               |
| 4.24E-06    | Metabolism               |
| 7.07E-07    | Metabolism               |
| 3.83E-06    | Metabolism               |
| 0.0456313   | Metabolism               |
| 1.02E-13    | TME                      |
| 9.75E-08    | TME                      |
| 1.15E-11    | TME                      |
| 0.934023806 | TME                      |
| 0.003820943 | TME                      |
| 0.013331576 | TME                      |
| 0.020012127 | TME                      |
| 0.000283344 | TME                      |
| 0.966495613 | TME                      |
| 0.001133368 | Proliferation/Metastasis |
| 3.90E-15    | Proliferation/Metastasis |
| 3.36E-05    | Metabolism               |
| 0.013112183 | Metabolism               |
| 0.322945538 | TME                      |
| 0.103929879 | Metabolism               |
| 8.03E-28    | Metabolism               |
| 2.11E-05    | TME                      |
| 0.687566024 | Proliferation/Metastasis |
| 0.010664419 | Proliferation/Metastasis |
| 0.524649075 | TME                      |
| 0.773356921 | Metabolism               |
| 0.000701579 | Metabolism               |
| 2.79E-06    | Proliferation/Metastasis |
| 1.08E-11    | Proliferation/Metastasis |
| 0.851202841 | TME                      |

|             |                          |
|-------------|--------------------------|
| 1.51E-09    | TME                      |
| 0.424055382 | TME                      |
| 0.000172481 | TME                      |
| 9.40E-15    | Proliferation/Metastasis |
| 2.26E-25    | TME                      |
| 5.49E-05    | TME                      |
| 0.572141388 | Metabolism               |
| 8.08E-06    | TME                      |
| 4.80E-05    | TME                      |
| 0.359089342 | TME                      |
| 0.127424867 | TME                      |
| 0.136975683 | Metabolism               |
| 0.00036712  | Metabolism               |
| 0.000124369 | Metabolism               |
| 1.39E-11    | TME                      |
| 0.020638808 | Metabolism               |
| 0.020492393 | TME                      |
| 0.117698572 | TME                      |
| 0.000657656 | TME                      |
| 0.279839956 | TME                      |
| 0.000179414 | TME                      |
| 0.000103957 | Metabolism               |
| 5.26E-07    | Proliferation/Metastasis |
| 0.000102365 | Metabolism               |
| 1.29E-06    | Proliferation/Metastasis |
| 0.010339668 | Metabolism               |
| 0.537196623 | Metabolism               |
| 0.000298004 | Metabolism               |
| 0.807144348 | Metabolism               |
| 0.225347964 | Metabolism               |
| 2.09E-14    | Metabolism               |
| 0.011403348 | Metabolism               |
| 7.80E-12    | Metabolism               |
| 0.010889942 | Metabolism               |
| 0.041417508 | Metabolism               |
| 1.32E-10    | Metabolism               |
| 8.83E-09    | Metabolism               |
| 1.05E-07    | Metabolism               |
| 0.018919255 | Metabolism               |
| 0.002279765 | TME                      |
| 6.33E-05    | Proliferation/Metastasis |
| 0.300011358 | Metabolism               |
| 5.53E-16    | Proliferation/Metastasis |

|             |                          |
|-------------|--------------------------|
| 0.374399592 | TME                      |
| 1.52E-06    | Proliferation/Metastasis |
| 0.005810134 | Proliferation/Metastasis |
| 0.429438576 | TME                      |
| 0.001048566 | TME                      |
| 0.015695824 | Metabolism               |
| 0.480919535 | Metabolism               |
| 0.084108587 | Proliferation/Metastasis |
| 0.504040825 | Proliferation/Metastasis |
| 8.21E-05    | Proliferation/Metastasis |
| 0.010935187 | Metabolism               |
| 0.11869219  | Metabolism               |
| 2.15E-11    | Metabolism               |
| 0.205311126 | Proliferation/Metastasis |
| 0.0061027   | TME                      |
| 0.000526825 | TME                      |
| 0.270130652 | Metabolism               |
| 0.016724633 | Proliferation/Metastasis |
| 0.289013841 | Metabolism               |
| 3.87E-06    | TME                      |
| 0.745502813 | TME                      |
| 4.10E-17    | TME                      |
| 6.25E-11    | TME                      |
| 0.392707622 | Metabolism               |
| 0.005068397 | TME                      |
| 3.28E-05    | Proliferation/Metastasis |
| 4.37E-07    | TME                      |
| 0.135630601 | Proliferation/Metastasis |
| 0.190593063 | Proliferation/Metastasis |
| 0.768391947 | Metabolism               |
| 0.235358333 | Proliferation/Metastasis |
| 0.002412731 | TME                      |
| 0.307929807 | Metabolism               |
| 0.600265399 | TME                      |
| 4.37E-07    | TME                      |
| 0.849551658 | TME                      |
| 0.00208729  | TME                      |
| 0.000655313 | TME                      |
| 0.016397829 | TME                      |
| 1.34E-05    | Metabolism               |
| 2.50E-05    | TME                      |
| 0.108649676 | Metabolism               |
| 0.001020092 | Metabolism               |

|             |                          |
|-------------|--------------------------|
| 0.33487735  | Proliferation/Metastasis |
| 9.66E-21    | Proliferation/Metastasis |
| 0.002039322 | Metabolism               |
| 8.87E-07    | Metabolism               |
| 9.27E-08    | Metabolism               |
| 0.005564179 | Metabolism               |
| 2.67E-11    | Proliferation/Metastasis |
| 0.381204554 | Proliferation/Metastasis |
| 1.12E-07    | Metabolism               |
| 0.010241078 | Metabolism               |
| 0.775089737 | Metabolism               |
| 2.56E-19    | TME                      |
| 0.00056038  | Metabolism               |
| 0.015818016 | Metabolism               |
| 0.010168141 | Metabolism               |
| 0.108155298 | Metabolism               |
| 0.06084939  | Proliferation/Metastasis |
| 0.373152836 | Metabolism               |
| 0.284969048 | Metabolism               |
| 4.80E-05    | Metabolism               |
| 0.374518014 | Metabolism               |
| 0.284041247 | Metabolism               |
| 9.31E-06    | Metabolism               |
| 0.085635508 | Proliferation/Metastasis |
| 0.868213806 | Metabolism               |
| 0.019064763 | Metabolism               |
| 0.000433407 | Proliferation/Metastasis |
| 8.12E-06    | Metabolism               |
| 0.445149141 | Metabolism               |
| 5.47E-16    | Metabolism               |
| 4.52E-06    | Metabolism               |
| 0.000203525 | Metabolism               |
| 0.24791378  | Metabolism               |
| 0.258102222 | Metabolism               |
| 6.92E-05    | Metabolism               |
| 0.000507843 | TME                      |
| 0.126107286 | TME                      |
| 1.48E-06    | TME                      |
| 1.09E-06    | TME                      |
| 0.015246481 | TME                      |
| 7.54E-07    | Metabolism               |
| 0.001185782 | Metabolism               |
| 9.67E-09    | Proliferation/Metastasis |

|             |                          |
|-------------|--------------------------|
| 0.054558629 | Metabolism               |
| 0.008580691 | Proliferation/Metastasis |
| 0.28618208  | Metabolism               |
| 0.228260465 | TME                      |
| 0.884652982 | Metabolism               |
| 0.342425186 | Metabolism               |
| 1.85E-10    | Metabolism               |
| 0.000137559 | Metabolism               |
| 1.39E-23    | TME                      |
| 3.77E-20    | TME                      |
| 1.26E-12    | Proliferation/Metastasis |
| 0.00054186  | Metabolism               |
| 4.87E-16    | Proliferation/Metastasis |
| 1.68E-22    | Proliferation/Metastasis |
| 0.258908854 | TME                      |
| 0.6877838   | TME                      |
| 6.17E-06    | TME                      |
| 0.040819762 | TME                      |
| 0.00013088  | Metabolism               |
| 0.436572721 | Proliferation/Metastasis |
| 1.95E-07    | Metabolism               |
| 0.01735236  | Metabolism               |
| 0.119914302 | Proliferation/Metastasis |
| 0.003387257 | Proliferation/Metastasis |
| 4.23E-06    | Metabolism               |
| 0.168016201 | Metabolism               |
| 9.75E-07    | Metabolism               |
| 0.54058165  | Metabolism               |
| 0.822886109 | TME                      |
| 0.002752452 | TME                      |
| 6.76E-05    | TME                      |
| 0.271129318 | TME                      |
| 0.471279568 | TME                      |
| 0.051014466 | Metabolism               |
| 0.121723065 | Metabolism               |
| 0.704185872 | Metabolism               |
| 0.317846688 | Metabolism               |
| 0.084622209 | Metabolism               |
| 3.52E-06    | TME                      |
| 0.000889615 | TME                      |
| 0.012486179 | TME                      |
| 0.007819255 | TME                      |
| 0.027937076 | TME                      |



|             |                          |
|-------------|--------------------------|
| 0.027192425 | TME                      |
| 0.005666736 | TME                      |
| 0.363388287 | TME                      |
| 0.008175028 | TME                      |
| 0.04107763  | Proliferation/Metastasis |
| 4.12E-08    | Proliferation/Metastasis |
| 0.001199318 | Metabolism               |
| 0.080870004 | Metabolism               |
| 0.75755659  | TME                      |
| 0.846071496 | Metabolism               |
| 5.64E-07    | Metabolism               |
| 0.000558352 | TME                      |
| 1.25E-11    | Proliferation/Metastasis |
| 0.00115998  | Proliferation/Metastasis |
| 0.409747075 | TME                      |
| 0.027173183 | Metabolism               |
| 1.16E-05    | Metabolism               |
| 0.890302405 | Proliferation/Metastasis |
| 9.51E-07    | Proliferation/Metastasis |
| 7.54E-06    | TME                      |
| 6.07E-05    | TME                      |
| 0.009256076 | TME                      |
| 0.000148973 | TME                      |
| 9.45E-08    | Proliferation/Metastasis |
| 0.003300111 | TME                      |
| 0.007880272 | TME                      |
| 0.216158148 | Metabolism               |
| 1.18E-06    | TME                      |
| 3.76E-06    | TME                      |
| 0.21178042  | TME                      |
| 0.442228406 | TME                      |
| 0.015115404 | Metabolism               |
| 0.321720185 | Metabolism               |
| 0.725497639 | Metabolism               |
| 0.000621248 | TME                      |
| 0.000379236 | Metabolism               |
| 0.00188757  | TME                      |
| 0.068442941 | TME                      |
| 0.00290939  | TME                      |
| 0.02858691  | TME                      |
| 0.457325338 | TME                      |
| 0.806246936 | Metabolism               |
| 0.023157621 | Proliferation/Metastasis |

|             |                          |
|-------------|--------------------------|
| 0.629061357 | Metabolism               |
| 0.022107265 | Proliferation/Metastasis |
| 0.201798146 | Metabolism               |
| 0.941419517 | Metabolism               |
| 5.88E-09    | Metabolism               |
| 0.223822761 | Metabolism               |
| 0.450933771 | Metabolism               |
| 0.21775464  | Metabolism               |
| 6.37E-05    | Metabolism               |
| 0.465425363 | Metabolism               |
| 0.089993966 | Metabolism               |
| 1.35E-06    | Metabolism               |
| 0.013140573 | Metabolism               |
| 0.131092514 | Metabolism               |
| 0.054026369 | Metabolism               |
| 0.390888475 | Metabolism               |
| 0.00224602  | TME                      |
| 3.53E-05    | Proliferation/Metastasis |
| 0.927915013 | Metabolism               |
| 0.014612765 | Proliferation/Metastasis |
| 0.006759658 | TME                      |
| 0.001710173 | Proliferation/Metastasis |
| 3.00E-05    | Proliferation/Metastasis |
| 0.085127741 | TME                      |
| 0.522250162 | TME                      |
| 1.64E-10    | Metabolism               |
| 1.53E-14    | Metabolism               |
| 1.83E-05    | Proliferation/Metastasis |
| 0.075910237 | Proliferation/Metastasis |
| 1.75E-07    | Proliferation/Metastasis |
| 4.81E-09    | Metabolism               |
| 8.29E-06    | Metabolism               |
| 0.553127136 | Metabolism               |
| 0.00064942  | Proliferation/Metastasis |
| 3.00E-05    | TME                      |
| 0.00071251  | TME                      |
| 0.663751424 | Metabolism               |
| 2.99E-09    | Proliferation/Metastasis |
| 1.88E-14    | Metabolism               |
| 0.001576077 | TME                      |
| 0.348669706 | TME                      |
| 0.023210008 | TME                      |
| 2.13E-06    | TME                      |

|             |                          |
|-------------|--------------------------|
| 0.000584225 | Metabolism               |
| 0.00526153  | TME                      |
| 6.36E-11    | Proliferation/Metastasis |
| 0.003469922 | TME                      |
| 1.50E-07    | Proliferation/Metastasis |
| 8.91E-07    | Proliferation/Metastasis |
| 8.08E-05    | Metabolism               |
| 0.042828382 | Proliferation/Metastasis |
| 1.16E-05    | TME                      |
| 7.31E-05    | Metabolism               |
| 0.613435351 | TME                      |
| 0.003211681 | TME                      |
| 0.003404356 | TME                      |
| 0.000906571 | TME                      |
| 0.084581021 | TME                      |
| 0.002030231 | TME                      |
| 0.451288702 | Metabolism               |
| 0.003845743 | TME                      |
| 0.01608961  | Metabolism               |
| 0.001678135 | Metabolism               |
| 2.92E-07    | Proliferation/Metastasis |
| 0.065257113 | Proliferation/Metastasis |
| 0.972377491 | Metabolism               |
| 7.25E-05    | Metabolism               |
| 0.194716343 | Metabolism               |
| 1.48E-06    | Metabolism               |
| 0.73249607  | Proliferation/Metastasis |
| 0.005366892 | Proliferation/Metastasis |
| 0.191905837 | Metabolism               |
| 0.248278171 | Metabolism               |
| 0.599200767 | Metabolism               |
| 0.026637673 | TME                      |
| 0.016179002 | Metabolism               |
| 0.003240079 | Metabolism               |
| 0.62024724  | Metabolism               |
| 4.08E-11    | Metabolism               |
| 0.000174046 | Proliferation/Metastasis |
| 0.057539053 | Metabolism               |
| 0.058443939 | Metabolism               |
| 0.000115624 | Metabolism               |
| 0.214134543 | Metabolism               |
| 0.00100735  | Metabolism               |
| 0.916556159 | Metabolism               |

|             |                          |
|-------------|--------------------------|
| 8.14E-05    | Proliferation/Metastasis |
| 0.004656175 | Metabolism               |
| 0.01543996  | Metabolism               |
| 1.41E-05    | Proliferation/Metastasis |
| 0.140838821 | Metabolism               |
| 3.04E-07    | Metabolism               |
| 1.03E-10    | Metabolism               |
| 0.836198586 | Metabolism               |
| 0.714386098 | Metabolism               |
| 0.16712544  | Metabolism               |
| 0.767845451 | Metabolism               |
| 0.148365516 | Metabolism               |
| 0.005167356 | TME                      |
| 0.038401327 | TME                      |
| 0.000191318 | TME                      |
| 0.040529915 | TME                      |
| 0.767163709 | TME                      |
| 0.109182122 | Metabolism               |
| 0.540647775 | Metabolism               |
| 1.94E-08    | Proliferation/Metastasis |
| 0.009833749 | Metabolism               |
| 1.51E-05    | Proliferation/Metastasis |
| 0.63317409  | Metabolism               |
| 0.760598181 | TME                      |
| 0.031727247 | Metabolism               |
| 0.195795601 | Metabolism               |
| 0.565969068 | Metabolism               |
| 0.049063014 | Metabolism               |
| 0.025095854 | TME                      |
| 0.095435054 | TME                      |
| 0.913900707 | Proliferation/Metastasis |
| 0.023592041 | Metabolism               |
| 0.879686913 | Proliferation/Metastasis |
| 0.946972596 | Proliferation/Metastasis |
| 0.496133793 | TME                      |
| 0.003348031 | TME                      |
| 0.001475198 | TME                      |
| 5.41E-06    | TME                      |
| 0.034800658 | Metabolism               |
| 7.23E-05    | Proliferation/Metastasis |
| 0.000621219 | Metabolism               |
| 0.006307065 | Metabolism               |
| 0.947833383 | Proliferation/Metastasis |

|             |                          |
|-------------|--------------------------|
| 2.33E-07    | Proliferation/Metastasis |
| 0.157956309 | Metabolism               |
| 0.009093422 | Metabolism               |
| 0.024396909 | Metabolism               |
| 0.109473158 | Metabolism               |
| 0.075200086 | TME                      |
| 0.030569405 | TME                      |
| 0.000594873 | TME                      |
| 0.060676325 | TME                      |
| 0.002848578 | TME                      |
| 0.088558509 | Metabolism               |
| 0.02577373  | Metabolism               |
| 0.126725426 | Metabolism               |
| 0.000898545 | Metabolism               |
| 0.115996772 | Metabolism               |
| 8.96E-06    | TME                      |
| 0.000333575 | TME                      |
| 0.001071109 | TME                      |
| 0.043289495 | TME                      |
| 0.000353757 | TME                      |
| 0.011127966 | TME                      |
| 0.001794437 | TME                      |
| 0.036520994 | TME                      |
| 0.000542843 | TME                      |
| 0.044502461 | Proliferation/Metastasis |
| 0.009467939 | Proliferation/Metastasis |
| 0.426319933 | Metabolism               |
| 0.709698021 | Metabolism               |
| 0.054780995 | TME                      |
| 0.718568312 | Metabolism               |
| 0.12093243  | Metabolism               |
| 2.44E-05    | TME                      |
| 0.014037351 | Proliferation/Metastasis |
| 0.179918429 | Proliferation/Metastasis |
| 0.406553113 | TME                      |
| 7.82E-05    | Metabolism               |
| 0.540037788 | Metabolism               |
| 0.108938796 | Proliferation/Metastasis |
| 7.64E-09    | Proliferation/Metastasis |
| 0.003919354 | TME                      |
| 0.000486053 | TME                      |
| 0.028108877 | TME                      |
| 4.11E-05    | TME                      |

|             |                          |
|-------------|--------------------------|
| 0.001915892 | Proliferation/Metastasis |
| 0.000352143 | TME                      |
| 0.000160713 | TME                      |
| 0.18679083  | Metabolism               |
| 3.41E-07    | TME                      |
| 2.03E-07    | TME                      |
| 0.002397445 | TME                      |
| 0.184482858 | TME                      |
| 0.351164307 | Metabolism               |
| 0.00078723  | Metabolism               |
| 0.08757201  | Metabolism               |
| 0.002344594 | TME                      |
| 5.46E-05    | Metabolism               |
| 1.43E-05    | TME                      |
| 0.007434737 | TME                      |
| 1.70E-05    | TME                      |
| 9.97E-05    | TME                      |
| 0.297546978 | TME                      |
| 0.066649428 | Metabolism               |
| 0.001166253 | Proliferation/Metastasis |
| 0.003449938 | Metabolism               |
| 0.511398024 | Proliferation/Metastasis |
| 0.140322713 | Metabolism               |
| 0.79297885  | Metabolism               |
| 0.253955004 | Metabolism               |
| 0.240403151 | Metabolism               |
| 0.909721623 | Metabolism               |
| 0.002266341 | Metabolism               |
| 0.34430362  | Metabolism               |
| 3.69E-05    | Metabolism               |
| 0.038499851 | Metabolism               |
| 0.045763247 | Metabolism               |
| 3.56E-06    | Metabolism               |
| 0.054745803 | Metabolism               |
| 0.155470326 | Metabolism               |
| 0.163744948 | Metabolism               |
| 0.000487958 | TME                      |
| 0.000758827 | Proliferation/Metastasis |
| 0.006744195 | Metabolism               |
| 3.62E-10    | Proliferation/Metastasis |
| 0.01779306  | TME                      |
| 7.23E-12    | Proliferation/Metastasis |
| 2.33E-11    | Proliferation/Metastasis |

|             |                          |
|-------------|--------------------------|
| 3.79E-05    | TME                      |
| 0.040885336 | TME                      |
| 0.021013464 | Metabolism               |
| 2.06E-09    | Metabolism               |
| 1.08E-15    | Proliferation/Metastasis |
| 0.442664636 | Proliferation/Metastasis |
| 1.95E-06    | Proliferation/Metastasis |
| 0.030679417 | Metabolism               |
| 5.58E-09    | Metabolism               |
| 0.011104337 | Metabolism               |
| 0.014572821 | Proliferation/Metastasis |
| 0.003044774 | TME                      |
| 0.001147619 | TME                      |
| 0.351550416 | Metabolism               |
| 4.81E-10    | Proliferation/Metastasis |
| 6.23E-07    | Metabolism               |
| 0.002307617 | TME                      |
| 0.042503836 | TME                      |
| 0.000206967 | TME                      |
| 8.42E-06    | TME                      |
| 0.000118637 | Metabolism               |
| 0.170862267 | TME                      |
| 4.32E-05    | Proliferation/Metastasis |
| 3.54E-05    | TME                      |
| 0.963793388 | Proliferation/Metastasis |
| 4.92E-05    | Proliferation/Metastasis |
| 1.17E-09    | Metabolism               |
| 0.007184397 | Proliferation/Metastasis |
| 8.25E-05    | TME                      |
| 0.031689671 | Metabolism               |
| 0.073764381 | TME                      |
| 0.047126969 | TME                      |
| 0.957765285 | TME                      |
| 8.26E-06    | TME                      |
| 0.00640397  | TME                      |
| 0.003874305 | TME                      |
| 0.001087143 | Metabolism               |
| 6.30E-05    | TME                      |
| 0.438689331 | Metabolism               |
| 0.000168761 | Metabolism               |
| 1.14E-05    | Proliferation/Metastasis |
| 6.33E-06    | Proliferation/Metastasis |
| 0.030045976 | Metabolism               |

|             |                          |
|-------------|--------------------------|
| 0.078681502 | Metabolism               |
| 0.221778108 | Metabolism               |
| 0.86521894  | Metabolism               |
| 4.57E-06    | Proliferation/Metastasis |
| 4.46E-07    | Proliferation/Metastasis |
| 0.776364073 | Metabolism               |
| 0.399568077 | Metabolism               |
| 0.723194811 | Metabolism               |
| 5.82E-05    | TME                      |
| 0.037620834 | Metabolism               |
| 0.78763336  | Metabolism               |
| 0.036955139 | Metabolism               |
| 0.063312803 | Metabolism               |
| 7.47E-07    | Proliferation/Metastasis |
| 0.486485706 | Metabolism               |
| 1.02E-05    | Metabolism               |
| 0.004022449 | Metabolism               |
| 0.00738281  | Metabolism               |
| 0.30750898  | Metabolism               |
| 0.109903028 | Metabolism               |
| 0.639402486 | Proliferation/Metastasis |
| 0.01983599  | Metabolism               |
| 0.764208558 | Metabolism               |
| 7.63E-06    | Proliferation/Metastasis |
| 0.003025546 | Metabolism               |
| 0.001488335 | Metabolism               |
| 0.085526433 | Metabolism               |
| 0.053101049 | Metabolism               |
| 0.041608592 | Metabolism               |
| 0.011566959 | Metabolism               |
| 0.010510844 | Metabolism               |
| 0.03183792  | Metabolism               |
| 0.000852923 | TME                      |
| 0.013396836 | TME                      |
| 3.65E-05    | TME                      |
| 0.008108156 | TME                      |
| 0.182135434 | TME                      |
| 0.621539305 | Metabolism               |
| 0.185085055 | Metabolism               |
| 3.32E-07    | Proliferation/Metastasis |
| 7.00E-05    | Metabolism               |
| 8.67E-10    | Proliferation/Metastasis |
| 0.360950881 | Metabolism               |



|             |                          |
|-------------|--------------------------|
| 0.013488048 | TME                      |
| 5.15E-05    | Metabolism               |
| 0.001027094 | Metabolism               |
| 0.00047124  | Metabolism               |
| 0.001482934 | Metabolism               |
| 0.000750494 | TME                      |
| 0.053064105 | TME                      |
| 4.07E-06    | Proliferation/Metastasis |
| 0.02911586  | Metabolism               |
| 0.001946405 | Proliferation/Metastasis |
| 0.001453435 | Proliferation/Metastasis |
| 0.040190129 | TME                      |
| 0.812442388 | TME                      |
| 0.00029739  | TME                      |
| 0.003760483 | TME                      |
| 0.665939683 | Metabolism               |
| 0.098305939 | Proliferation/Metastasis |
| 0.006104604 | Metabolism               |
| 0.119511316 | Metabolism               |
| 0.000126456 | Proliferation/Metastasis |
| 0.032646567 | Proliferation/Metastasis |
| 0.012449127 | Metabolism               |
| 0.764005991 | Metabolism               |
| 0.006787182 | Metabolism               |
| 0.619444416 | Metabolism               |
| 0.016238624 | TME                      |
| 0.015005198 | TME                      |
| 0.010714607 | TME                      |
| 0.461715672 | TME                      |
| 0.265025224 | TME                      |
| 0.439182506 | Metabolism               |
| 0.299197379 | Metabolism               |
| 0.034350823 | Metabolism               |
| 0.05856308  | Metabolism               |
| 0.776941531 | Metabolism               |
| 0.000174154 | TME                      |
| 0.000139697 | TME                      |
| 0.000889544 | TME                      |
| 0.008274034 | TME                      |
| 0.000336262 | TME                      |
| 0.001192232 | TME                      |
| 0.000759241 | TME                      |
| 0.017190174 | TME                      |

|             |                          |
|-------------|--------------------------|
| 0.001401237 | TME                      |
| 0.298323035 | Proliferation/Metastasis |
| 0.382506342 | Proliferation/Metastasis |
| 0.777082685 | Metabolism               |
| 0.528084995 | Metabolism               |
| 0.011986944 | TME                      |
| 0.223759767 | Metabolism               |
| 0.000367459 | Metabolism               |
| 0.000713539 | TME                      |
| 1.60E-05    | Proliferation/Metastasis |
| 0.000430657 | Proliferation/Metastasis |
| 0.817586518 | TME                      |
| 0.411098053 | Metabolism               |
| 0.015490884 | Metabolism               |
| 0.025254943 | Proliferation/Metastasis |
| 0.036739612 | Proliferation/Metastasis |
| 2.50E-05    | TME                      |
| 0.00127381  | TME                      |
| 1.86E-05    | TME                      |
| 0.000149162 | TME                      |
| 0.004348674 | Proliferation/Metastasis |
| 0.032126954 | TME                      |
| 0.002334232 | TME                      |
| 0.038373167 | Metabolism               |
| 0.000609751 | TME                      |
| 0.00011186  | TME                      |
| 0.006232214 | TME                      |
| 0.417608954 | TME                      |
| 0.136032134 | Metabolism               |
| 0.845883487 | Metabolism               |
| 0.766991342 | Metabolism               |
| 0.000577851 | TME                      |
| 0.844259281 | Metabolism               |
| 1.65E-07    | TME                      |
| 0.001390826 | TME                      |
| 1.70E-05    | TME                      |
| 0.084537819 | TME                      |
| 0.00354086  | TME                      |
| 0.0030947   | Metabolism               |
| 0.548402112 | Proliferation/Metastasis |
| 0.142339031 | Metabolism               |
| 0.26158879  | Proliferation/Metastasis |
| 0.29046774  | Metabolism               |

|             |                          |
|-------------|--------------------------|
| 0.114339398 | Metabolism               |
| 0.0656319   | Metabolism               |
| 0.898759442 | Metabolism               |
| 0.591805135 | Metabolism               |
| 0.082026979 | Metabolism               |
| 0.19271832  | Metabolism               |
| 0.317648104 | Metabolism               |
| 0.38994659  | Metabolism               |
| 0.48231561  | Metabolism               |
| 0.723641943 | Metabolism               |
| 0.864891247 | Metabolism               |
| 0.224752102 | Metabolism               |
| 0.030912731 | Metabolism               |
| 0.001158594 | TME                      |
| 0.004802572 | Proliferation/Metastasis |
| 0.751669378 | Metabolism               |
| 0.068455059 | Proliferation/Metastasis |
| 0.004743285 | TME                      |
| 0.000164714 | Proliferation/Metastasis |
| 2.98E-06    | Proliferation/Metastasis |
| 0.001205421 | TME                      |
| 0.010798433 | TME                      |
| 8.45E-08    | Metabolism               |
| 6.42E-09    | Metabolism               |
| 0.005803044 | Proliferation/Metastasis |
| 0.003808501 | Proliferation/Metastasis |
| 3.53E-07    | Proliferation/Metastasis |
| 0.007595425 | Metabolism               |
| 0.389080365 | Metabolism               |
| 0.184446866 | Metabolism               |
| 0.584690099 | Proliferation/Metastasis |
| 0.001034114 | TME                      |
| 0.000465171 | TME                      |
| 0.017777679 | Metabolism               |
| 2.04E-05    | Proliferation/Metastasis |
| 0.003857056 | Metabolism               |
| 2.76E-05    | TME                      |
| 0.001060977 | TME                      |
| 0.023094918 | TME                      |
| 4.75E-05    | TME                      |
| 0.052301214 | Metabolism               |
| 0.004194349 | TME                      |
| 0.005567261 | Proliferation/Metastasis |

|             |                          |
|-------------|--------------------------|
| 0.001454533 | TME                      |
| 0.692847735 | Proliferation/Metastasis |
| 0.0476617   | Proliferation/Metastasis |
| 2.81E-07    | Metabolism               |
| 8.26E-05    | Proliferation/Metastasis |
| 2.93E-05    | TME                      |
| 0.539141383 | Metabolism               |
| 0.762494618 | TME                      |
| 0.008466455 | TME                      |
| 0.000461295 | TME                      |
| 5.22E-05    | TME                      |
| 0.354537176 | TME                      |
| 0.00011604  | TME                      |
| 0.962332947 | Metabolism               |
| 0.001923616 | TME                      |
| 0.602540849 | Metabolism               |
| 0.010811413 | Metabolism               |
| 5.17E-05    | Proliferation/Metastasis |
| 0.262840299 | Proliferation/Metastasis |
| 0.55437013  | Metabolism               |
| 0.88665068  | Metabolism               |
| 0.000627013 | Metabolism               |
| 0.001544212 | Metabolism               |
| 0.285909949 | Proliferation/Metastasis |
| 0.142473218 | Proliferation/Metastasis |
| 0.791732183 | Metabolism               |
| 0.001049835 | Metabolism               |
| 0.74740082  | Metabolism               |
| 0.003184258 | TME                      |
| 0.691799227 | Metabolism               |
| 0.095172142 | Metabolism               |
| 0.197989223 | Metabolism               |
| 0.023426196 | Metabolism               |
| 0.00304006  | Proliferation/Metastasis |
| 0.009475497 | Metabolism               |
| 0.859543635 | Metabolism               |
| 0.955232732 | Metabolism               |
| 0.231151222 | Metabolism               |
| 2.94E-05    | Metabolism               |
| 0.795680984 | Metabolism               |
| 0.551222601 | Proliferation/Metastasis |
| 0.615927197 | Metabolism               |
| 0.251209049 | Metabolism               |

|             |                          |
|-------------|--------------------------|
| 0.019982761 | Proliferation/Metastasis |
| 0.493382186 | Metabolism               |
| 2.41E-05    | Metabolism               |
| 0.045190645 | Metabolism               |
| 0.882248977 | Metabolism               |
| 0.554891556 | Metabolism               |
| 0.999085423 | Metabolism               |
| 0.164998158 | Metabolism               |
| 0.584850822 | Metabolism               |
| 0.001917193 | TME                      |
| 1.98E-05    | TME                      |
| 1.04E-05    | TME                      |
| 0.003976659 | TME                      |
| 0.035239551 | TME                      |
| 0.002618606 | Metabolism               |
| 0.063564717 | Metabolism               |
| 0.0511419   | Proliferation/Metastasis |
| 0.134907314 | Metabolism               |
| 0.000377973 | Proliferation/Metastasis |
| 0.132925359 | Metabolism               |
| 0.355076734 | TME                      |
| 0.715891072 | Metabolism               |
| 0.000212827 | Metabolism               |
| 0.561574867 | Metabolism               |
| 0.504104909 | Metabolism               |
| 0.14753138  | TME                      |
| 0.180533793 | TME                      |
| 0.323724847 | Proliferation/Metastasis |
| 0.922036751 | Metabolism               |
| 0.513379889 | Proliferation/Metastasis |
| 0.837036561 | Proliferation/Metastasis |
| 0.020799047 | TME                      |
| 2.52E-05    | TME                      |
| 2.16E-06    | TME                      |
| 3.74E-10    | TME                      |
| 0.942097692 | Metabolism               |
| 4.28E-08    | Proliferation/Metastasis |
| 0.010790453 | Metabolism               |
| 0.0020338   | Metabolism               |
| 0.273899068 | Proliferation/Metastasis |
| 1.33E-05    | Proliferation/Metastasis |
| 3.12E-07    | Metabolism               |
| 1.67E-07    | Metabolism               |

|             |                          |
|-------------|--------------------------|
| 0.015272898 | Metabolism               |
| 0.6026715   | Metabolism               |
| 0.002466705 | TME                      |
| 4.20E-06    | TME                      |
| 0.00017135  | TME                      |
| 0.359203137 | TME                      |
| 1.87E-10    | TME                      |
| 0.406629277 | Metabolism               |
| 0.189485851 | Metabolism               |
| 0.887607411 | Metabolism               |
| 0.00118248  | Metabolism               |
| 0.709288243 | Metabolism               |
| 0.001769612 | TME                      |
| 0.24126841  | TME                      |
| 7.43E-07    | TME                      |
| 1.06E-08    | TME                      |
| 6.10E-07    | TME                      |
| 1.89E-06    | TME                      |
| 2.54E-06    | TME                      |
| 2.62E-05    | TME                      |
| 3.42E-06    | TME                      |
| 0.115225422 | Proliferation/Metastasis |
| 6.32E-05    | Proliferation/Metastasis |
| 0.116879865 | Metabolism               |
| 0.288853615 | Metabolism               |
| 4.72E-07    | TME                      |
| 0.118578961 | Metabolism               |
| 0.125833652 | Metabolism               |
| 6.34E-10    | TME                      |
| 0.017438239 | Proliferation/Metastasis |
| 0.76499268  | Proliferation/Metastasis |
| 5.49E-08    | TME                      |
| 0.021008753 | Metabolism               |
| 1.60E-06    | Metabolism               |
| 0.123733442 | Proliferation/Metastasis |
| 0.014139706 | Proliferation/Metastasis |
| 0.000119794 | TME                      |
| 0.000496408 | TME                      |
| 2.30E-07    | TME                      |
| 0.002758256 | TME                      |
| 0.809004705 | Proliferation/Metastasis |
| 0.012215659 | TME                      |
| 3.37E-11    | TME                      |

|             |                          |
|-------------|--------------------------|
| 0.424277239 | Metabolism               |
| 5.17E-05    | TME                      |
| 6.17E-09    | TME                      |
| 5.17E-12    | TME                      |
| 0.018674903 | TME                      |
| 0.446651707 | Metabolism               |
| 0.101125974 | Metabolism               |
| 0.444629738 | Metabolism               |
| 0.00060031  | TME                      |
| 0.00521369  | Metabolism               |
| 6.64E-11    | TME                      |
| 2.67E-05    | TME                      |
| 4.05E-09    | TME                      |
| 2.38E-10    | TME                      |
| 0.001334632 | TME                      |
| 0.052348727 | Metabolism               |
| 0.099309858 | Proliferation/Metastasis |
| 0.000240446 | Metabolism               |
| 0.348841471 | Proliferation/Metastasis |
| 2.65E-05    | Metabolism               |
| 0.000236483 | Metabolism               |
| 0.000190234 | Metabolism               |
| 0.324894822 | Metabolism               |
| 0.544825468 | Metabolism               |
| 0.000129786 | Metabolism               |
| 0.24610883  | Metabolism               |
| 0.186461144 | Metabolism               |
| 0.00144473  | Metabolism               |
| 0.932029411 | Metabolism               |
| 0.00196354  | Metabolism               |
| 0.299849238 | Metabolism               |
| 0.002501044 | Metabolism               |
| 0.551716657 | Metabolism               |
| 1.21E-08    | TME                      |
| 0.036618088 | Proliferation/Metastasis |
| 0.007764815 | Metabolism               |
| 4.99E-05    | Proliferation/Metastasis |
| 7.22E-06    | TME                      |
| 1.72E-16    | Proliferation/Metastasis |
| 9.69E-13    | Proliferation/Metastasis |
| 1.99E-08    | TME                      |
| 5.16E-15    | TME                      |
| 0.002911626 | Metabolism               |

|             |                          |
|-------------|--------------------------|
| 0.109620783 | Metabolism               |
| 0.033738284 | Proliferation/Metastasis |
| 0.005408561 | Proliferation/Metastasis |
| 3.69E-09    | Proliferation/Metastasis |
| 0.014403405 | Metabolism               |
| 0.003716839 | Metabolism               |
| 8.38E-08    | Metabolism               |
| 0.007195221 | Proliferation/Metastasis |
| 2.32E-07    | TME                      |
| 1.46E-06    | TME                      |
| 0.084993896 | Metabolism               |
| 2.20E-05    | Proliferation/Metastasis |
| 0.095604881 | Metabolism               |
| 0.000131548 | TME                      |
| 5.06E-09    | TME                      |
| 1.78E-06    | TME                      |
| 0.000289299 | TME                      |
| 0.007145245 | Metabolism               |
| 0.001972743 | TME                      |
| 0.007451374 | Proliferation/Metastasis |
| 5.50E-13    | TME                      |
| 0.00052913  | Proliferation/Metastasis |
| 0.002178898 | Proliferation/Metastasis |
| 0.474741172 | Metabolism               |
| 0.004903835 | Proliferation/Metastasis |
| 1.11E-06    | TME                      |
| 0.45085819  | Metabolism               |
| 0.014759425 | TME                      |
| 0.207439991 | TME                      |
| 0.58585277  | TME                      |
| 8.23E-10    | TME                      |
| 0.000123699 | TME                      |
| 3.98E-05    | TME                      |
| 0.180209685 | Metabolism               |
| 1.73E-14    | TME                      |
| 0.09920767  | Metabolism               |
| 0.512273727 | Metabolism               |
| 3.70E-10    | Proliferation/Metastasis |
| 0.03869369  | Proliferation/Metastasis |
| 0.311885626 | Metabolism               |
| 0.01112894  | Metabolism               |
| 0.231418348 | Metabolism               |
| 0.000481162 | Metabolism               |



|             |                          |
|-------------|--------------------------|
| 2.23E-11    | Proliferation/Metastasis |
| 0.000941341 | Proliferation/Metastasis |
| 0.234598162 | Metabolism               |
| 0.668756846 | Metabolism               |
| 0.027583179 | Metabolism               |
| 2.09E-05    | TME                      |
| 2.47E-06    | Metabolism               |
| 0.009436654 | Metabolism               |
| 0.539682516 | Metabolism               |
| 0.002319271 | Metabolism               |
| 0.000661953 | Proliferation/Metastasis |
| 0.017418561 | Metabolism               |
| 0.073753204 | Metabolism               |
| 3.47E-06    | Metabolism               |
| 0.198007398 | Metabolism               |
| 0.126178722 | Metabolism               |
| 0.43399762  | Metabolism               |
| 0.00017363  | Proliferation/Metastasis |
| 0.001186021 | Metabolism               |
| 0.000165604 | Metabolism               |
| 0.532899459 | Proliferation/Metastasis |
| 0.000110575 | Metabolism               |
| 0.083226002 | Metabolism               |
| 0.043632305 | Metabolism               |
| 0.241782307 | Metabolism               |
| 0.038291963 | Metabolism               |
| 0.000600264 | Metabolism               |
| 0.192143053 | Metabolism               |
| 0.710039507 | Metabolism               |
| 3.70E-07    | TME                      |
| 5.63E-11    | TME                      |
| 3.93E-08    | TME                      |
| 3.83E-09    | TME                      |
| 3.26E-07    | TME                      |
| 0.878471391 | Metabolism               |
| 0.833005357 | Metabolism               |
| 0.444332585 | Proliferation/Metastasis |
| 0.865803855 | Metabolism               |
| 3.75E-13    | Proliferation/Metastasis |
| 0.013715738 | Metabolism               |
| 0.092084407 | TME                      |
| 8.21E-06    | Metabolism               |
| 0.820162698 | Metabolism               |

|             |                          |
|-------------|--------------------------|
| 9.81E-06    | Metabolism               |
| 0.004778079 | Metabolism               |
| 0.004847761 | TME                      |
| 0.006249547 | TME                      |
| 0.00012012  | Proliferation/Metastasis |
| 0.782489682 | Metabolism               |
| 0.003798945 | Proliferation/Metastasis |
| 0.256709187 | Proliferation/Metastasis |
| 0.053321696 | TME                      |
| 0.227941549 | TME                      |
| 0.534111281 | TME                      |
| 0.296358399 | TME                      |
| 0.234066895 | Metabolism               |
| 0.000181067 | Proliferation/Metastasis |
| 0.804958718 | Metabolism               |
| 0.16730155  | Metabolism               |
| 0.739139486 | Proliferation/Metastasis |
| 0.927482302 | Proliferation/Metastasis |
| 0.929100111 | Metabolism               |
| 0.02102439  | Metabolism               |
| 0.305974837 | Metabolism               |
| 0.044239772 | Metabolism               |
| 0.754392434 | TME                      |
| 0.721075693 | TME                      |
| 0.24663407  | TME                      |
| 0.342402048 | TME                      |
| 0.468280241 | TME                      |
| 0.191959686 | Metabolism               |
| 0.017890324 | Metabolism               |
| 0.000390252 | Metabolism               |
| 0.069622306 | Metabolism               |
| 0.457792309 | Metabolism               |
| 0.36615895  | TME                      |
| 0.038479727 | TME                      |
| 0.777575709 | TME                      |
| 0.517528617 | TME                      |
| 0.955662709 | TME                      |
| 0.621680455 | TME                      |
| 0.71296469  | TME                      |
| 0.070232078 | TME                      |
| 0.635260545 | TME                      |
| 0.727187051 | Proliferation/Metastasis |
| 0.275627916 | Proliferation/Metastasis |

|             |                          |
|-------------|--------------------------|
| 0.000227579 | Metabolism               |
| 0.001072061 | Metabolism               |
| 0.045464171 | TME                      |
| 0.245317685 | Metabolism               |
| 0.627898394 | Metabolism               |
| 0.605142362 | TME                      |
| 0.014133484 | Proliferation/Metastasis |
| 0.051123367 | Proliferation/Metastasis |
| 0.255359884 | TME                      |
| 0.916078784 | Metabolism               |
| 0.742921548 | Metabolism               |
| 0.108711032 | Proliferation/Metastasis |
| 0.844261406 | Proliferation/Metastasis |
| 0.776309594 | TME                      |
| 0.86349267  | TME                      |
| 0.635063849 | TME                      |
| 0.5871321   | TME                      |
| 0.005726862 | Proliferation/Metastasis |
| 0.867680176 | TME                      |
| 0.515271623 | TME                      |
| 0.413637777 | Metabolism               |
| 0.76036891  | TME                      |
| 0.616670707 | TME                      |
| 0.650941916 | TME                      |
| 0.024570973 | TME                      |
| 0.142959928 | Metabolism               |
| 0.095035911 | Metabolism               |
| 0.311528384 | Metabolism               |
| 0.998693837 | TME                      |
| 0.766205877 | Metabolism               |
| 0.656090753 | TME                      |
| 0.967677432 | TME                      |
| 0.969890124 | TME                      |
| 0.439393006 | TME                      |
| 0.038676066 | TME                      |
| 0.91606592  | Metabolism               |
| 0.466554719 | Proliferation/Metastasis |
| 0.312847783 | Metabolism               |
| 0.399044003 | Proliferation/Metastasis |
| 0.770793265 | Metabolism               |
| 0.183291444 | Metabolism               |
| 0.466206585 | Metabolism               |
| 0.258858569 | Metabolism               |

|             |                          |
|-------------|--------------------------|
| 0.157726854 | Metabolism               |
| 0.971105895 | Metabolism               |
| 0.183052175 | Metabolism               |
| 0.870492035 | Metabolism               |
| 0.026758159 | Metabolism               |
| 0.822863059 | Metabolism               |
| 0.284521138 | Metabolism               |
| 0.912901479 | Metabolism               |
| 0.126610738 | Metabolism               |
| 0.003361363 | Metabolism               |
| 0.454405878 | TME                      |
| 0.246657302 | Proliferation/Metastasis |
| 0.012806099 | Metabolism               |
| 0.789875597 | Proliferation/Metastasis |
| 0.193293446 | TME                      |
| 0.500149616 | Proliferation/Metastasis |
| 0.661478595 | Proliferation/Metastasis |
| 0.735876361 | TME                      |
| 0.838554335 | TME                      |
| 0.290144419 | Metabolism               |
| 0.451893283 | Metabolism               |
| 0.815588586 | Proliferation/Metastasis |
| 2.43E-05    | Proliferation/Metastasis |
| 0.320596193 | Proliferation/Metastasis |
| 0.602078814 | Metabolism               |
| 0.107958766 | Metabolism               |
| 0.039276372 | Metabolism               |
| 0.134787738 | Proliferation/Metastasis |
| 0.747540896 | TME                      |
| 0.481997673 | TME                      |
| 0.103530355 | Metabolism               |
| 0.126991642 | Proliferation/Metastasis |
| 0.060071661 | Metabolism               |
| 0.707281691 | TME                      |
| 0.678881139 | TME                      |
| 0.956553872 | TME                      |
| 0.772914396 | TME                      |
| 0.410092561 | Metabolism               |
| 0.499840397 | TME                      |
| 0.909089122 | Proliferation/Metastasis |
| 0.721012656 | TME                      |
| 0.001396156 | Proliferation/Metastasis |
| 0.095422946 | Proliferation/Metastasis |

|             |                          |
|-------------|--------------------------|
| 0.014119169 | Metabolism               |
| 0.039143426 | Proliferation/Metastasis |
| 0.703263348 | TME                      |
| 0.336481601 | Metabolism               |
| 0.505565146 | TME                      |
| 0.374625058 | TME                      |
| 0.54872812  | TME                      |
| 0.857467632 | TME                      |
| 0.004921079 | TME                      |
| 0.647712647 | TME                      |
| 0.09498458  | Metabolism               |
| 0.922494906 | TME                      |
| 0.869589867 | Metabolism               |
| 0.02370934  | Metabolism               |
| 0.56416313  | Proliferation/Metastasis |
| 0.148632429 | Proliferation/Metastasis |
| 2.88E-07    | Metabolism               |
| 0.029647663 | Metabolism               |
| 0.803071293 | Metabolism               |
| 0.097913289 | Metabolism               |
| 0.019214257 | Proliferation/Metastasis |
| 0.088122046 | Proliferation/Metastasis |
| 0.173471845 | Metabolism               |
| 0.260877219 | Metabolism               |
| 0.509065238 | Metabolism               |
| 0.803026059 | TME                      |
| 0.300612984 | Metabolism               |
| 0.597419865 | Metabolism               |
| 0.481167249 | Metabolism               |
| 0.353950493 | Metabolism               |
| 0.435513309 | Proliferation/Metastasis |
| 0.000110302 | Metabolism               |
| 0.31397846  | Metabolism               |
| 0.018599076 | Metabolism               |
| 0.285998735 | Metabolism               |
| 0.27889985  | Metabolism               |
| 2.92E-07    | Metabolism               |
| 0.006139402 | Proliferation/Metastasis |
| 0.153432283 | Metabolism               |
| 0.007105061 | Metabolism               |
| 0.032753721 | Proliferation/Metastasis |
| 0.119821358 | Metabolism               |
| 0.305263568 | Metabolism               |

|             |                          |
|-------------|--------------------------|
| 0.06153096  | Metabolism               |
| 0.947009751 | Metabolism               |
| 0.127065566 | Metabolism               |
| 0.70851975  | Metabolism               |
| 0.071428709 | Metabolism               |
| 0.784396701 | Metabolism               |
| 0.760163675 | TME                      |
| 0.744443115 | TME                      |
| 0.780033916 | TME                      |
| 0.825756167 | TME                      |
| 0.675804098 | TME                      |
| 0.119047815 | Metabolism               |
| 0.840796013 | Metabolism               |
| 0.844570855 | Proliferation/Metastasis |
| 0.959981561 | Metabolism               |
| 0.684837117 | Proliferation/Metastasis |
| 0.120528959 | Metabolism               |
| 0.01996986  | TME                      |
| 0.33143732  | Metabolism               |
| 0.059867011 | Metabolism               |
| 0.029927614 | Metabolism               |
| 0.076938583 | Metabolism               |
| 0.65142151  | TME                      |
| 0.682785669 | TME                      |
| 0.469863736 | Proliferation/Metastasis |
| 0.390961262 | Metabolism               |
| 0.149013156 | Proliferation/Metastasis |
| 0.470044953 | Proliferation/Metastasis |
| 0.000418276 | TME                      |
| 3.03E-15    | TME                      |
| 3.45E-06    | TME                      |
| 8.71E-06    | TME                      |
| 5.21E-07    | Metabolism               |
| 0.936260273 | Proliferation/Metastasis |
| 0.323010798 | Metabolism               |
| 0.002179936 | Metabolism               |
| 1.54E-10    | Proliferation/Metastasis |
| 1.86E-35    | Proliferation/Metastasis |
| 1.28E-08    | Metabolism               |
| 0.481373391 | Metabolism               |
| 0.099967571 | Metabolism               |
| 3.20E-06    | Metabolism               |
| 0.002244296 | TME                      |

|             |                          |
|-------------|--------------------------|
| 1.06E-29    | TME                      |
| 2.49E-12    | TME                      |
| 1.77E-05    | TME                      |
| 3.44E-12    | TME                      |
| 0.6045177   | Metabolism               |
| 0.00146745  | Metabolism               |
| 2.75E-09    | Metabolism               |
| 0.000321816 | Metabolism               |
| 0.005846303 | Metabolism               |
| 1.22E-21    | TME                      |
| 1.92E-12    | TME                      |
| 1.00E-23    | TME                      |
| 9.57E-05    | TME                      |
| 1.87E-10    | TME                      |
| 1.49E-09    | TME                      |
| 2.60E-09    | TME                      |
| 6.12E-05    | TME                      |
| 0.001790405 | TME                      |
| 6.06E-12    | Proliferation/Metastasis |
| 1.44E-18    | Proliferation/Metastasis |
| 1.26E-07    | Metabolism               |
| 5.51E-11    | Metabolism               |
| 2.91E-18    | TME                      |
| 0.241913897 | Metabolism               |
| 9.10E-09    | Metabolism               |
| 1.01E-21    | TME                      |
| 0.16317746  | Proliferation/Metastasis |
| 2.74E-05    | Proliferation/Metastasis |
| 4.11E-06    | TME                      |
| 0.000673473 | Metabolism               |
| 0.169869145 | Metabolism               |
| 1.01E-08    | Proliferation/Metastasis |
| 8.30E-27    | Proliferation/Metastasis |
| 7.41E-05    | TME                      |
| 1.35E-18    | TME                      |
| 6.55E-08    | TME                      |
| 4.51E-10    | TME                      |
| 1.96E-07    | Proliferation/Metastasis |
| 4.60E-52    | TME                      |
| 1.29E-13    | TME                      |
| 0.022564233 | Metabolism               |
| 2.42E-17    | TME                      |
| 8.26E-19    | TME                      |

|             |                          |
|-------------|--------------------------|
| 7.09E-08    | TME                      |
| 0.035958457 | TME                      |
| 0.779352172 | Metabolism               |
| 0.632647421 | Metabolism               |
| 0.278726829 | Metabolism               |
| 1.38E-45    | TME                      |
| 0.681194678 | Metabolism               |
| 4.51E-09    | TME                      |
| 0.003276178 | TME                      |
| 2.18E-09    | TME                      |
| 1.59E-05    | TME                      |
| 0.811463058 | TME                      |
| 0.050378206 | Metabolism               |
| 2.60E-13    | Proliferation/Metastasis |
| 0.083976496 | Metabolism               |
| 9.39E-16    | Proliferation/Metastasis |
| 0.001443357 | Metabolism               |
| 0.018217955 | Metabolism               |
| 2.14E-09    | Metabolism               |
| 0.270856598 | Metabolism               |
| 0.041567258 | Metabolism               |
| 1.24E-28    | Metabolism               |
| 0.198878901 | Metabolism               |
| 1.75E-14    | Metabolism               |
| 0.165141526 | Metabolism               |
| 3.78E-07    | Metabolism               |
| 0.012168572 | Metabolism               |
| 0.265665373 | Metabolism               |
| 3.78E-20    | Metabolism               |
| 2.60E-11    | Metabolism               |
| 1.88E-12    | TME                      |
| 7.00E-05    | Proliferation/Metastasis |
| 4.43E-05    | Metabolism               |
| 2.53E-09    | Proliferation/Metastasis |
| 1.41E-06    | TME                      |
| 7.80E-14    | Proliferation/Metastasis |
| 1.88E-07    | Proliferation/Metastasis |
| 1.36E-05    | TME                      |
| 2.50E-15    | TME                      |
| 0.001426104 | Metabolism               |
| 0.603280769 | Metabolism               |
| 0.016778    | Proliferation/Metastasis |
| 4.89E-11    | Proliferation/Metastasis |



|             |                          |
|-------------|--------------------------|
| 1.13E-16    | Proliferation/Metastasis |
| 0.055650911 | Metabolism               |
| 0.000186382 | Metabolism               |
| 1.19E-18    | Metabolism               |
| 0.708292579 | Proliferation/Metastasis |
| 7.01E-12    | TME                      |
| 1.95E-15    | TME                      |
| 4.13E-10    | Metabolism               |
| 4.59E-10    | Proliferation/Metastasis |
| 0.899141957 | Metabolism               |
| 2.40E-06    | TME                      |
| 3.93E-05    | TME                      |
| 4.46E-51    | TME                      |
| 2.17E-35    | TME                      |
| 0.00155651  | Metabolism               |
| 0.000205472 | TME                      |
| 1.71E-08    | Proliferation/Metastasis |
| 7.10E-27    | TME                      |
| 0.000252322 | Proliferation/Metastasis |
| 9.57E-09    | Proliferation/Metastasis |
| 0.000140563 | Metabolism               |
| 3.37E-07    | Proliferation/Metastasis |
| 1.43E-15    | TME                      |
| 1.95E-13    | Metabolism               |
| 0.260647899 | TME                      |
| 9.78E-12    | TME                      |
| 0.000974351 | TME                      |
| 9.23E-13    | TME                      |
| 0.254091728 | TME                      |
| 0.004966715 | TME                      |
| 0.020560294 | Metabolism               |
| 2.10E-15    | TME                      |
| 0.005039024 | Metabolism               |
| 0.74979837  | Metabolism               |
| 0.028593476 | Proliferation/Metastasis |
| 2.19E-07    | Proliferation/Metastasis |
| 1.09E-14    | Metabolism               |
| 2.39E-06    | Metabolism               |
| 0.651425161 | Metabolism               |
| 0.007269736 | Metabolism               |
| 4.66E-07    | Proliferation/Metastasis |
| 0.004299233 | Proliferation/Metastasis |
| 0.667640425 | Metabolism               |

|             |                          |
|-------------|--------------------------|
| 1.11E-06    | Metabolism               |
| 0.036943139 | Metabolism               |
| 3.12E-51    | TME                      |
| 8.99E-09    | Metabolism               |
| 0.499520974 | Metabolism               |
| 0.199955772 | Metabolism               |
| 0.001269117 | Metabolism               |
| 0.001900696 | Proliferation/Metastasis |
| 0.000391061 | Metabolism               |
| 0.000268736 | Metabolism               |
| 4.41E-14    | Metabolism               |
| 0.045032331 | Metabolism               |
| 1.17E-06    | Metabolism               |
| 8.46E-06    | Metabolism               |
| 7.17E-10    | Proliferation/Metastasis |
| 0.008903999 | Metabolism               |
| 0.026819988 | Metabolism               |
| 0.172218877 | Proliferation/Metastasis |
| 1.97E-12    | Metabolism               |
| 1.23E-07    | Metabolism               |
| 2.94E-19    | Metabolism               |
| 0.585421111 | Metabolism               |
| 4.26E-05    | Metabolism               |
| 0.154506665 | Metabolism               |
| 6.70E-09    | Metabolism               |
| 0.69985451  | Metabolism               |
| 5.98E-18    | TME                      |
| 1.08E-06    | TME                      |
| 2.79E-08    | TME                      |
| 7.87E-16    | TME                      |
| 2.91E-10    | TME                      |
| 0.005224469 | Metabolism               |
| 5.14E-14    | Metabolism               |
| 6.56E-05    | Proliferation/Metastasis |
| 0.227893936 | Metabolism               |
| 0.002398201 | Proliferation/Metastasis |
| 0.02129369  | Metabolism               |
| 0.334687195 | TME                      |
| 5.36E-05    | Metabolism               |
| 2.81E-05    | Metabolism               |
| 0.005493889 | Metabolism               |
| 1.25E-05    | Metabolism               |
| 2.39E-67    | TME                      |

|             |                          |
|-------------|--------------------------|
| 2.43E-31    | TME                      |
| 2.44E-12    | Proliferation/Metastasis |
| 0.000213398 | Metabolism               |
| 0.642983161 | Proliferation/Metastasis |
| 0.000733885 | Proliferation/Metastasis |
| 0.043750912 | TME                      |
| 0.458769561 | TME                      |
| 1.23E-11    | TME                      |
| 0.00038844  | TME                      |
| 3.16E-08    | Metabolism               |
| 2.32E-05    | Proliferation/Metastasis |
| 0.781589562 | Metabolism               |
| 0.396843647 | Metabolism               |
| 0.947500411 | Proliferation/Metastasis |
| 0.031417891 | Proliferation/Metastasis |
| 0.023287438 | Metabolism               |
| 0.482763789 | Metabolism               |
| 0.051572686 | Metabolism               |
| 0.095895366 | Metabolism               |
| 0.05046261  | TME                      |
| 8.63E-06    | TME                      |
| 6.89E-08    | TME                      |
| 0.326233832 | TME                      |
| 0.4921413   | TME                      |
| 0.000219347 | Metabolism               |
| 0.015487815 | Metabolism               |
| 0.30600915  | Metabolism               |
| 0.008187082 | Metabolism               |
| 0.193259644 | Metabolism               |
| 1.57E-12    | TME                      |
| 3.70E-07    | TME                      |
| 4.64E-05    | TME                      |
| 0.000489422 | TME                      |
| 0.003467348 | TME                      |
| 0.000163051 | TME                      |
| 8.49E-05    | TME                      |
| 0.056727867 | TME                      |
| 9.09E-05    | TME                      |
| 0.139266701 | Proliferation/Metastasis |
| 2.33E-08    | Proliferation/Metastasis |
| 0.216571437 | Metabolism               |
| 0.599507571 | Metabolism               |
| 0.210856983 | TME                      |

|             |                          |
|-------------|--------------------------|
| 0.085624102 | Metabolism               |
| 2.56E-16    | Metabolism               |
| 9.75E-06    | TME                      |
| 1.61E-32    | Proliferation/Metastasis |
| 1.65E-07    | Proliferation/Metastasis |
| 0.424103041 | TME                      |
| 0.002069872 | Metabolism               |
| 5.11E-11    | Metabolism               |
| 0.392557936 | Proliferation/Metastasis |
| 3.27E-08    | Proliferation/Metastasis |
| 5.97E-11    | TME                      |
| 5.88E-10    | TME                      |
| 1.28E-07    | TME                      |
| 1.09E-08    | TME                      |
| 1.39E-08    | Proliferation/Metastasis |
| 1.27E-09    | TME                      |
| 1.69E-05    | TME                      |
| 0.019379267 | Metabolism               |
| 9.27E-12    | TME                      |
| 2.37E-05    | TME                      |
| 0.202214216 | TME                      |
| 0.736591756 | TME                      |
| 0.001197009 | Metabolism               |
| 0.005895567 | Metabolism               |
| 7.32E-12    | Metabolism               |
| 9.46E-06    | TME                      |
| 3.06E-06    | Metabolism               |
| 3.83E-08    | TME                      |
| 2.83E-06    | TME                      |
| 1.26E-05    | TME                      |
| 0.30217153  | TME                      |
| 0.142161822 | TME                      |
| 3.00E-05    | Metabolism               |
| 0.006771873 | Proliferation/Metastasis |
| 0.050787055 | Metabolism               |
| 7.25E-16    | Proliferation/Metastasis |
| 1.88E-05    | Metabolism               |
| 0.003325725 | Metabolism               |
| 3.95E-09    | Metabolism               |
| 0.003080866 | Metabolism               |
| 0.247193103 | Metabolism               |
| 0.023440256 | Metabolism               |
| 1.25E-07    | Metabolism               |

|             |                          |
|-------------|--------------------------|
| 0.007362156 | Metabolism               |
| 0.00131907  | Metabolism               |
| 0.057426831 | Metabolism               |
| 0.008474557 | Metabolism               |
| 0.000745617 | Metabolism               |
| 0.234892737 | Metabolism               |
| 0.718513777 | Metabolism               |
| 2.13E-05    | TME                      |
| 6.90E-26    | Proliferation/Metastasis |
| 0.884377823 | Metabolism               |
| 0.000140045 | Proliferation/Metastasis |
| 0.000180475 | TME                      |
| 1.05E-09    | Proliferation/Metastasis |
| 9.00E-13    | Proliferation/Metastasis |
| 0.000114575 | TME                      |
| 0.238168793 | TME                      |
| 2.92E-31    | Metabolism               |
| 5.15E-45    | Metabolism               |
| 0.027373289 | Proliferation/Metastasis |
| 0.232194214 | Proliferation/Metastasis |
| 5.61E-18    | Proliferation/Metastasis |
| 0.00309352  | Metabolism               |
| 3.10E-07    | Metabolism               |
| 7.62E-12    | Metabolism               |
| 0.087070221 | Proliferation/Metastasis |
| 6.42E-10    | TME                      |
| 1.54E-06    | TME                      |
| 0.163456021 | Metabolism               |
| 7.97E-16    | Proliferation/Metastasis |
| 2.52E-42    | Metabolism               |
| 1.37E-08    | TME                      |
| 8.83E-06    | TME                      |
| 0.140350981 | TME                      |
| 2.95E-10    | TME                      |
| 1.02E-05    | Metabolism               |
| 2.54E-07    | TME                      |
| 6.70E-28    | Proliferation/Metastasis |
| 0.006239962 | TME                      |
| 1.92E-13    | Proliferation/Metastasis |
| 0.299030368 | Proliferation/Metastasis |
| 5.97E-50    | Metabolism               |
| 5.54E-05    | Proliferation/Metastasis |
| 3.39E-10    | TME                      |

|             |                          |
|-------------|--------------------------|
| 5.97E-06    | Metabolism               |
| 0.024739213 | TME                      |
| 7.18E-20    | TME                      |
| 4.72E-16    | TME                      |
| 1.95E-07    | TME                      |
| 0.113616182 | TME                      |
| 1.24E-09    | TME                      |
| 0.004368669 | Metabolism               |
| 1.96E-07    | TME                      |
| 0.002633133 | Metabolism               |
| 1.46E-05    | Metabolism               |
| 3.83E-11    | Proliferation/Metastasis |
| 0.002315473 | Proliferation/Metastasis |
| 0.647335182 | Metabolism               |
| 0.044075802 | Metabolism               |
| 0.015894147 | Metabolism               |
| 6.31E-35    | Metabolism               |
| 0.080230929 | Proliferation/Metastasis |
| 0.000240077 | Proliferation/Metastasis |
| 0.000524769 | Metabolism               |
| 0.086331427 | Metabolism               |
| 0.001960045 | Metabolism               |
| 0.026159044 | TME                      |
| 3.02E-05    | Metabolism               |
| 0.010494397 | Metabolism               |
| 0.00151989  | Metabolism               |
| 7.10E-23    | Metabolism               |
| 0.000613755 | Proliferation/Metastasis |
| 0.000290374 | Metabolism               |
| 0.36467048  | Metabolism               |
| 4.25E-17    | Metabolism               |
| 0.052836726 | Metabolism               |
| 1.03E-11    | Metabolism               |
| 0.554592088 | Metabolism               |
| 0.28714612  | Proliferation/Metastasis |
| 0.010123949 | Metabolism               |
| 5.33E-05    | Metabolism               |
| 1.80E-23    | Proliferation/Metastasis |
| 2.86E-22    | Metabolism               |
| 6.06E-42    | Metabolism               |
| 1.03E-17    | Metabolism               |
| 7.50E-07    | Metabolism               |
| 0.030255828 | Metabolism               |

|             |                          |
|-------------|--------------------------|
| 0.000247905 | Metabolism               |
| 0.001349882 | Metabolism               |
| 0.011272399 | Metabolism               |
| 3.14E-07    | TME                      |
| 0.000256451 | TME                      |
| 1.16E-11    | TME                      |
| 3.10E-05    | TME                      |
| 0.018671208 | TME                      |
| 0.037796752 | Metabolism               |
| 0.569143737 | Metabolism               |
| 3.89E-27    | Proliferation/Metastasis |
| 7.74E-14    | Metabolism               |
| 2.24E-09    | Proliferation/Metastasis |
| 0.000515127 | Metabolism               |
| 0.101490017 | TME                      |
| 0.000498942 | Metabolism               |
| 0.027770602 | Metabolism               |
| 0.030120028 | Metabolism               |
| 8.74E-07    | Metabolism               |
| 0.02651787  | TME                      |
| 0.006275958 | TME                      |
| 0.052297182 | Proliferation/Metastasis |
| 0.105953011 | Metabolism               |
| 0.002706109 | Proliferation/Metastasis |
| 9.57E-07    | Proliferation/Metastasis |
| 6.05E-23    | TME                      |
| 0.000255151 | TME                      |
| 2.28E-13    | TME                      |
| 0.125641276 | TME                      |
| 1.39E-12    | Metabolism               |
| 4.95E-10    | Proliferation/Metastasis |
| 0.003268618 | Metabolism               |
| 8.24E-05    | Metabolism               |
| 2.61E-19    | Proliferation/Metastasis |
| 0.003267756 | Proliferation/Metastasis |
| 1.46E-05    | Metabolism               |
| 0.034761393 | Metabolism               |
| 0.724377965 | Metabolism               |
| 9.71E-07    | Metabolism               |
| 7.99E-08    | TME                      |
| 3.06E-11    | TME                      |
| 8.58E-08    | TME                      |
| 0.115548981 | TME                      |

|             |                          |
|-------------|--------------------------|
| 1.18E-21    | TME                      |
| 5.27E-07    | Metabolism               |
| 0.333674665 | Metabolism               |
| 2.59E-07    | Metabolism               |
| 0.52426701  | Metabolism               |
| 3.98E-19    | Metabolism               |
| 2.38E-19    | TME                      |
| 2.28E-16    | TME                      |
| 1.36E-14    | TME                      |
| 0.000221217 | TME                      |
| 0.000269674 | TME                      |
| 1.61E-06    | TME                      |
| 5.99E-06    | TME                      |
| 5.41E-05    | TME                      |
| 0.006935688 | TME                      |
| 1.96E-20    | Proliferation/Metastasis |
| 1.62E-16    | Proliferation/Metastasis |
| 8.95E-10    | Metabolism               |
| 8.18E-10    | Metabolism               |
| 3.78E-14    | TME                      |
| 0.523928811 | Metabolism               |
| 0.269193364 | Metabolism               |
| 2.90E-12    | TME                      |
| 1.43E-24    | Proliferation/Metastasis |
| 1.99E-16    | Proliferation/Metastasis |
| 0.014711412 | TME                      |
| 0.031256746 | Metabolism               |
| 2.42E-09    | Metabolism               |
| 1.54E-23    | Proliferation/Metastasis |
| 5.13E-11    | Proliferation/Metastasis |
| 1.50E-06    | TME                      |
| 2.35E-14    | TME                      |
| 1.39E-06    | TME                      |
| 3.02E-05    | TME                      |
| 4.07E-06    | Proliferation/Metastasis |
| 2.54E-13    | TME                      |
| 1.99E-07    | TME                      |
| 4.16E-07    | Metabolism               |
| 1.76E-16    | TME                      |
| 1.64E-15    | TME                      |
| 0.002275691 | TME                      |
| 4.97E-07    | TME                      |
| 0.140244373 | Metabolism               |



|             |                          |
|-------------|--------------------------|
| 3.72E-05    | Metabolism               |
| 0.00231758  | Metabolism               |
| 6.37E-15    | TME                      |
| 2.28E-08    | Metabolism               |
| 7.36E-07    | TME                      |
| 0.005401462 | TME                      |
| 8.53E-12    | TME                      |
| 0.902744189 | TME                      |
| 0.036499486 | TME                      |
| 3.75E-06    | Metabolism               |
| 4.60E-18    | Proliferation/Metastasis |
| 0.787574269 | Metabolism               |
| 3.51E-14    | Proliferation/Metastasis |
| 0.031233689 | Metabolism               |
| 0.119771879 | Metabolism               |
| 7.17E-05    | Metabolism               |
| 0.665865267 | Metabolism               |
| 0.027827796 | Metabolism               |
| 0.00755256  | Metabolism               |
| 2.48E-10    | Metabolism               |
| 0.114085288 | Metabolism               |
| 0.154585397 | Metabolism               |
| 1.61E-17    | Metabolism               |
| 1.86E-08    | Metabolism               |
| 9.13E-13    | Metabolism               |
| 1.49E-06    | Metabolism               |
| 3.80E-14    | Metabolism               |
| 5.36E-10    | TME                      |
| 2.09E-05    | Proliferation/Metastasis |
| 7.36E-13    | Metabolism               |
| 8.50E-08    | Proliferation/Metastasis |
| 8.68E-06    | TME                      |
| 1.46E-05    | Proliferation/Metastasis |
| 2.22E-06    | Proliferation/Metastasis |
| 4.41E-06    | TME                      |
| 3.57E-06    | TME                      |
| 1.20E-18    | Metabolism               |
| 1.78E-07    | Metabolism               |
| 3.07E-07    | Proliferation/Metastasis |
| 3.10E-33    | Proliferation/Metastasis |
| 2.22E-09    | Proliferation/Metastasis |
| 0.308447902 | Metabolism               |
| 0.029577973 | Metabolism               |

|             |                          |
|-------------|--------------------------|
| 0.663281326 | Metabolism               |
| 3.79E-08    | Proliferation/Metastasis |
| 2.47E-05    | TME                      |
| 6.94E-06    | TME                      |
| 0.062110166 | Metabolism               |
| 2.36E-16    | Proliferation/Metastasis |
| 0.00241512  | Metabolism               |
| 3.74E-05    | TME                      |
| 3.10E-06    | TME                      |
| 6.51E-14    | TME                      |
| 2.67E-21    | TME                      |
| 0.244950266 | Metabolism               |
| 0.023868359 | TME                      |
| 0.168733265 | Proliferation/Metastasis |
| 2.68E-11    | TME                      |
| 0.783949549 | Proliferation/Metastasis |
| 1.79E-13    | Proliferation/Metastasis |
| 0.057665935 | Metabolism               |
| 2.64E-54    | Proliferation/Metastasis |
| 9.26E-13    | TME                      |
| 6.24E-07    | Metabolism               |
| 2.89E-10    | TME                      |
| 1.29E-09    | TME                      |
| 9.09E-13    | TME                      |
| 1.75E-10    | TME                      |
| 9.93E-06    | TME                      |
| 7.95E-06    | TME                      |
| 0.000545147 | Metabolism               |
| 1.13E-10    | TME                      |
| 1.91E-08    | Metabolism               |
| 0.185246513 | Metabolism               |
| 0.001727955 | Proliferation/Metastasis |
| 4.34E-08    | Proliferation/Metastasis |
| 2.25E-18    | Metabolism               |
| 0.024560497 | Metabolism               |
| 3.12E-08    | Metabolism               |
| 6.54E-07    | Metabolism               |
| 0.001146572 | Proliferation/Metastasis |
| 1.54E-05    | Proliferation/Metastasis |
| 0.001685411 | Metabolism               |
| 1.31E-14    | Metabolism               |
| 1.15E-13    | Metabolism               |
| 2.29E-20    | TME                      |

|             |                          |
|-------------|--------------------------|
| 5.60E-07    | Metabolism               |
| 0.036189723 | Metabolism               |
| 0.019926278 | Metabolism               |
| 8.09E-10    | Metabolism               |
| 0.004266339 | Proliferation/Metastasis |
| 1.70E-10    | Metabolism               |
| 0.43496079  | Metabolism               |
| 0.290666805 | Metabolism               |
| 1.38E-34    | Metabolism               |
| 6.13E-35    | Metabolism               |
| 0.004519379 | Metabolism               |
| 0.087764949 | Proliferation/Metastasis |
| 0.207490637 | Metabolism               |
| 0.002335438 | Metabolism               |
| 1.31E-08    | Proliferation/Metastasis |
| 2.43E-06    | Metabolism               |
| 0.07736203  | Metabolism               |
| 0.000786875 | Metabolism               |
| 3.92E-06    | Metabolism               |
| 0.516021529 | Metabolism               |
| 0.000383148 | Metabolism               |
| 0.000158649 | Metabolism               |
| 1.90E-06    | Metabolism               |
| 1.47E-11    | TME                      |
| 3.75E-06    | TME                      |
| 2.23E-14    | TME                      |
| 2.05E-11    | TME                      |
| 2.49E-10    | TME                      |
| 0.075979608 | Metabolism               |
| 0.028604003 | Metabolism               |
| 6.32E-08    | Proliferation/Metastasis |
| 1.52E-07    | Metabolism               |
| 0.000642739 | Proliferation/Metastasis |
| 5.58E-05    | Metabolism               |
| 0.480369857 | TME                      |
| 0.054126211 | Metabolism               |
| 0.002572231 | Metabolism               |
| 0.050482617 | Metabolism               |
| 0.026895524 | Metabolism               |
| 0.000150164 | TME                      |
| 1.61E-11    | TME                      |
| 4.08E-10    | Proliferation/Metastasis |
| 9.22E-07    | Metabolism               |

|             |                          |
|-------------|--------------------------|
| 1.49E-05    | Proliferation/Metastasis |
| 0.201420895 | Proliferation/Metastasis |
| 1.31E-09    | TME                      |
| 0.002854456 | TME                      |
| 4.47E-10    | TME                      |
| 0.005775135 | TME                      |
| 1.95E-05    | Metabolism               |
| 0.003450085 | Proliferation/Metastasis |
| 0.002247149 | Metabolism               |
| 0.00318998  | Metabolism               |
| 2.05E-05    | Proliferation/Metastasis |
| 5.23E-05    | Proliferation/Metastasis |
| 0.010889639 | Metabolism               |
| 6.69E-11    | Metabolism               |
| 8.47E-06    | Metabolism               |
| 4.72E-05    | Metabolism               |
| 8.48E-05    | TME                      |
| 9.06E-14    | TME                      |
| 5.17E-10    | TME                      |
| 0.035379098 | TME                      |
| 0.146064857 | TME                      |
| 2.21E-17    | Metabolism               |
| 1.51E-05    | Metabolism               |
| 0.202391504 | Metabolism               |
| 3.28E-10    | Metabolism               |
| 1.11E-10    | Metabolism               |
| 1.07E-13    | TME                      |
| 2.25E-17    | TME                      |
| 2.25E-08    | TME                      |
| 0.001421178 | TME                      |
| 0.000700325 | TME                      |
| 1.53E-05    | TME                      |
| 2.57E-05    | TME                      |
| 0.000767366 | TME                      |
| 0.000243915 | TME                      |
| 0.718238324 | Proliferation/Metastasis |
| 0.809653145 | Proliferation/Metastasis |
| 0.097297606 | Metabolism               |
| 0.037756919 | Metabolism               |
| 1.02E-07    | TME                      |
| 0.120798428 | Metabolism               |
| 6.29E-10    | Metabolism               |
| 1.18E-06    | TME                      |

|             |                          |
|-------------|--------------------------|
| 6.25E-18    | Proliferation/Metastasis |
| 3.58E-08    | Proliferation/Metastasis |
| 0.654319994 | TME                      |
| 9.12E-08    | Metabolism               |
| 0.485148053 | Metabolism               |
| 0.001014013 | Proliferation/Metastasis |
| 4.07E-06    | Proliferation/Metastasis |
| 1.53E-07    | TME                      |
| 9.57E-08    | TME                      |
| 1.97E-07    | TME                      |
| 3.37E-06    | TME                      |
| 5.03E-10    | Proliferation/Metastasis |
| 3.07E-14    | TME                      |
| 5.08E-05    | TME                      |
| 0.018248171 | Metabolism               |
| 2.17E-13    | TME                      |
| 3.96E-06    | TME                      |
| 0.019181778 | TME                      |
| 1.86E-05    | TME                      |
| 0.343419438 | Metabolism               |
| 2.56E-11    | Metabolism               |
| 0.6013458   | Metabolism               |
| 5.93E-10    | TME                      |
| 0.167139724 | Metabolism               |
| 3.88E-06    | TME                      |
| 9.72E-08    | TME                      |
| 1.16E-08    | TME                      |
| 0.105169351 | TME                      |
| 0.009497969 | TME                      |
| 0.062412204 | Metabolism               |
| 0.501545255 | Proliferation/Metastasis |
| 0.064607593 | Metabolism               |
| 9.26E-16    | Proliferation/Metastasis |
| 2.37E-05    | Metabolism               |
| 0.162708762 | Metabolism               |
| 0.043198624 | Metabolism               |
| 0.003315382 | Metabolism               |
| 0.000154925 | Metabolism               |
| 0.010968366 | Metabolism               |
| 4.21E-08    | Metabolism               |
| 0.00526068  | Metabolism               |
| 3.17E-06    | Metabolism               |
| 9.95E-11    | Metabolism               |

|             |                          |
|-------------|--------------------------|
| 3.83E-09    | Metabolism               |
| 5.17E-09    | Metabolism               |
| 0.675988172 | Metabolism               |
| 0.215827233 | Metabolism               |
| 1.31E-08    | TME                      |
| 7.98E-10    | Proliferation/Metastasis |
| 4.82E-09    | Metabolism               |
| 3.45E-06    | Proliferation/Metastasis |
| 5.53E-05    | TME                      |
| 1.38E-13    | Proliferation/Metastasis |
| 1.32E-10    | Proliferation/Metastasis |
| 0.121647908 | TME                      |
| 0.024375056 | TME                      |
| 4.07E-19    | Metabolism               |
| 8.30E-23    | Metabolism               |
| 0.000446051 | Proliferation/Metastasis |
| 0.331930738 | Proliferation/Metastasis |
| 3.21E-19    | Proliferation/Metastasis |
| 0.52729161  | Metabolism               |
| 0.036053309 | Metabolism               |
| 1.08E-08    | Metabolism               |
| 7.01E-10    | Proliferation/Metastasis |
| 5.00E-06    | TME                      |
| 6.39E-07    | TME                      |
| 0.012466565 | Metabolism               |
| 6.38E-15    | Proliferation/Metastasis |
| 1.44E-17    | Metabolism               |
| 5.34E-08    | TME                      |
| 2.96E-09    | TME                      |
| 2.51E-06    | TME                      |
| 1.41E-12    | TME                      |
| 0.000188612 | Metabolism               |
| 1.16E-05    | TME                      |
| 3.10E-05    | Proliferation/Metastasis |
| 8.36E-06    | TME                      |
| 3.08E-09    | Proliferation/Metastasis |
| 0.00052827  | Proliferation/Metastasis |
| 2.07E-27    | Metabolism               |
| 4.02E-07    | Proliferation/Metastasis |
| 3.21E-10    | TME                      |
| 3.41E-05    | Metabolism               |
| 2.49E-07    | TME                      |
| 2.57E-13    | TME                      |

|             |                          |
|-------------|--------------------------|
| 2.81E-08    | TME                      |
| 3.16E-08    | TME                      |
| 3.97E-05    | TME                      |
| 2.41E-06    | TME                      |
| 7.39E-09    | Metabolism               |
| 1.97E-10    | TME                      |
| 7.07E-12    | Metabolism               |
| 1.31E-12    | Metabolism               |
| 0.00015496  | Proliferation/Metastasis |
| 1.62E-07    | Proliferation/Metastasis |
| 0.309219257 | Metabolism               |
| 0.389825789 | Metabolism               |
| 5.91E-09    | Metabolism               |
| 2.03E-06    | Metabolism               |
| 0.018953922 | Proliferation/Metastasis |
| 9.87E-08    | Proliferation/Metastasis |
| 3.00E-14    | Metabolism               |
| 0.000149178 | Metabolism               |
| 0.004567471 | Metabolism               |
| 4.89E-11    | TME                      |
| 0.001090036 | Metabolism               |
| 0.000963082 | Metabolism               |
| 1.82E-06    | Metabolism               |
| 1.12E-23    | Metabolism               |
| 1.63E-13    | Proliferation/Metastasis |
| 0.213369967 | Metabolism               |
| 4.09E-07    | Metabolism               |
| 6.60E-12    | Metabolism               |
| 0.014102953 | Metabolism               |
| 1.87E-12    | Metabolism               |
| 0.007758256 | Metabolism               |
| 0.166226427 | Proliferation/Metastasis |
| 3.17E-08    | Metabolism               |
| 0.066880379 | Metabolism               |
| 2.13E-24    | Proliferation/Metastasis |
| 2.48E-13    | Metabolism               |
| 1.51E-19    | Metabolism               |
| 1.21E-14    | Metabolism               |
| 2.13E-11    | Metabolism               |
| 0.846759015 | Metabolism               |
| 0.149764946 | Metabolism               |
| 8.97E-14    | Metabolism               |
| 2.03E-06    | Metabolism               |

|             |                          |
|-------------|--------------------------|
| 1.24E-09    | TME                      |
| 2.65E-05    | TME                      |
| 1.55E-11    | TME                      |
| 3.84E-08    | TME                      |
| 4.01E-05    | TME                      |
| 5.74E-05    | Metabolism               |
| 0.103850093 | Metabolism               |
| 1.63E-17    | Proliferation/Metastasis |
| 0.001576168 | Metabolism               |
| 0.000180029 | Proliferation/Metastasis |
| 4.11E-12    | Metabolism               |
| 0.017367071 | TME                      |
| 2.23E-06    | Metabolism               |
| 0.221937945 | Metabolism               |
| 0.186940224 | Metabolism               |
| 3.91E-10    | Metabolism               |
| 0.0019268   | TME                      |
| 1.15E-06    | TME                      |
| 4.98E-09    | Proliferation/Metastasis |
| 0.777899386 | Metabolism               |
| 3.75E-05    | Proliferation/Metastasis |
| 0.92616316  | Proliferation/Metastasis |
| 1.39E-05    | TME                      |
| 5.18E-23    | TME                      |
| 6.64E-10    | TME                      |
| 3.39E-08    | TME                      |
| 4.97E-09    | Metabolism               |
| 0.32691166  | Proliferation/Metastasis |
| 0.209831145 | Metabolism               |
| 0.00029845  | Metabolism               |
| 1.02E-18    | Proliferation/Metastasis |
| 8.08E-31    | Proliferation/Metastasis |
| 3.97E-15    | Metabolism               |
| 0.0974172   | Metabolism               |
| 0.035891415 | Metabolism               |
| 4.00E-06    | Metabolism               |
| 0.000204656 | TME                      |
| 1.52E-36    | TME                      |
| 1.45E-13    | TME                      |
| 4.64E-09    | TME                      |
| 1.24E-34    | TME                      |
| 0.993142823 | Metabolism               |
| 8.04E-07    | Metabolism               |



|             |                          |
|-------------|--------------------------|
| 7.28E-12    | Metabolism               |
| 4.92E-06    | Metabolism               |
| 0.000387789 | Metabolism               |
| 2.61E-29    | TME                      |
| 2.30E-14    | TME                      |
| 9.36E-30    | TME                      |
| 3.80E-07    | TME                      |
| 2.76E-10    | TME                      |
| 3.37E-11    | TME                      |
| 5.76E-11    | TME                      |
| 2.02E-11    | TME                      |
| 3.82E-08    | TME                      |
| 1.30E-12    | Proliferation/Metastasis |
| 2.39E-27    | Proliferation/Metastasis |
| 7.13E-11    | Metabolism               |
| 6.39E-07    | Metabolism               |
| 1.90E-18    | TME                      |
| 0.136266803 | Metabolism               |
| 1.76E-17    | Metabolism               |
| 2.41E-33    | TME                      |
| 0.623679243 | Proliferation/Metastasis |
| 0.000151527 | Proliferation/Metastasis |
| 1.68E-08    | TME                      |
| 0.000176529 | Metabolism               |
| 0.014715167 | Metabolism               |
| 1.12E-09    | Proliferation/Metastasis |
| 1.03E-18    | Proliferation/Metastasis |
| 1.67E-06    | TME                      |
| 1.96E-23    | TME                      |
| 3.49E-09    | TME                      |
| 4.25E-08    | TME                      |
| 3.84E-06    | Proliferation/Metastasis |
| 5.08E-37    | TME                      |
| 4.72E-21    | TME                      |
| 2.02E-06    | Metabolism               |
| 3.93E-18    | TME                      |
| 8.24E-34    | TME                      |
| 2.77E-13    | TME                      |
| 0.020924699 | TME                      |
| 0.207962187 | Metabolism               |
| 0.265923688 | Metabolism               |
| 0.001032255 | Metabolism               |
| 8.81E-32    | TME                      |

|             |                          |
|-------------|--------------------------|
| 0.209047377 | Metabolism               |
| 4.98E-14    | TME                      |
| 0.046145581 | TME                      |
| 5.86E-18    | TME                      |
| 3.38E-13    | TME                      |
| 0.849607332 | TME                      |
| 0.954293485 | Metabolism               |
| 1.09E-17    | Proliferation/Metastasis |
| 0.071653684 | Metabolism               |
| 9.93E-08    | Proliferation/Metastasis |
| 0.000163736 | Metabolism               |
| 0.355996681 | Metabolism               |
| 1.39E-18    | Metabolism               |
| 0.927915236 | Metabolism               |
| 0.010036335 | Metabolism               |
| 1.51E-25    | Metabolism               |
| 0.784277659 | Metabolism               |
| 2.91E-16    | Metabolism               |
| 0.743661006 | Metabolism               |
| 0.052533289 | Metabolism               |
| 0.075036591 | Metabolism               |
| 0.003391362 | Metabolism               |
| 1.85E-20    | Metabolism               |
| 7.36E-10    | Metabolism               |
| 2.49E-14    | TME                      |
| 0.325582742 | Proliferation/Metastasis |
| 1.20E-07    | Metabolism               |
| 2.44E-31    | Proliferation/Metastasis |
| 3.72E-09    | TME                      |
| 2.02E-31    | Proliferation/Metastasis |
| 6.12E-23    | Proliferation/Metastasis |
| 1.98E-08    | TME                      |
| 1.13E-47    | TME                      |
| 2.02E-07    | Metabolism               |
| 0.009347598 | Metabolism               |
| 0.780369454 | Proliferation/Metastasis |
| 2.03E-17    | Proliferation/Metastasis |
| 9.49E-19    | Proliferation/Metastasis |
| 0.206204259 | Metabolism               |
| 4.92E-10    | Metabolism               |
| 2.39E-37    | Metabolism               |
| 0.389911926 | Proliferation/Metastasis |
| 4.82E-17    | TME                      |

|             |                          |
|-------------|--------------------------|
| 5.92E-25    | TME                      |
| 1.26E-12    | Metabolism               |
| 2.74E-19    | Proliferation/Metastasis |
| 0.650700583 | Metabolism               |
| 1.11E-05    | TME                      |
| 0.000216045 | TME                      |
| 4.99E-55    | TME                      |
| 2.24E-36    | TME                      |
| 4.16E-05    | Metabolism               |
| 0.00068839  | TME                      |
| 2.94E-21    | Proliferation/Metastasis |
| 3.82E-52    | TME                      |
| 5.22E-16    | Proliferation/Metastasis |
| 9.84E-08    | Proliferation/Metastasis |
| 1.89E-10    | Metabolism               |
| 7.64E-06    | Proliferation/Metastasis |
| 3.57E-18    | TME                      |
| 1.24E-24    | Metabolism               |
| 0.122994821 | TME                      |
| 1.69E-07    | TME                      |
| 0.030857174 | TME                      |
| 2.40E-20    | TME                      |
| 1.88E-08    | TME                      |
| 0.002784604 | TME                      |
| 0.000219699 | Metabolism               |
| 7.79E-31    | TME                      |
| 3.56E-06    | Metabolism               |
| 0.002002551 | Metabolism               |
| 6.95E-10    | Proliferation/Metastasis |
| 4.49E-07    | Proliferation/Metastasis |
| 1.87E-23    | Metabolism               |
| 0.000254134 | Metabolism               |
| 0.146828125 | Metabolism               |
| 0.000382775 | Metabolism               |
| 1.06E-30    | Proliferation/Metastasis |
| 0.504768828 | Proliferation/Metastasis |
| 0.081999113 | Metabolism               |
| 1.86E-11    | Metabolism               |
| 0.052852102 | Metabolism               |
| 9.36E-41    | TME                      |
| 2.18E-12    | Metabolism               |
| 0.661348921 | Metabolism               |
| 0.000604006 | Metabolism               |

|             |                          |
|-------------|--------------------------|
| 0.925976876 | Metabolism               |
| 2.53E-06    | Proliferation/Metastasis |
| 0.006590465 | Metabolism               |
| 0.000442372 | Metabolism               |
| 1.51E-19    | Metabolism               |
| 0.000894686 | Metabolism               |
| 1.59E-05    | Metabolism               |
| 3.50E-06    | Metabolism               |
| 1.55E-09    | Proliferation/Metastasis |
| 0.000432335 | Metabolism               |
| 0.022251437 | Metabolism               |
| 0.096818688 | Proliferation/Metastasis |
| 1.84E-26    | Metabolism               |
| 3.16E-15    | Metabolism               |
| 3.47E-23    | Metabolism               |
| 0.57198294  | Metabolism               |
| 0.047478511 | Metabolism               |
| 0.004902537 | Metabolism               |
| 2.53E-15    | Metabolism               |
| 0.624988009 | Metabolism               |
| 4.93E-24    | TME                      |
| 1.24E-12    | TME                      |
| 2.00E-18    | TME                      |
| 1.32E-29    | TME                      |
| 6.43E-18    | TME                      |
| 7.78E-07    | Metabolism               |
| 7.55E-17    | Metabolism               |
| 0.078545972 | Proliferation/Metastasis |
| 0.046496096 | Metabolism               |
| 4.22E-29    | Proliferation/Metastasis |
| 0.012778863 | Metabolism               |
| 0.205304103 | TME                      |
| 1.45E-05    | Metabolism               |
| 2.46E-09    | Metabolism               |
| 2.01E-06    | Metabolism               |
| 6.35E-09    | Metabolism               |
| 5.13E-60    | TME                      |
| 3.27E-22    | TME                      |
| 2.54E-17    | Proliferation/Metastasis |
| 0.000114918 | Metabolism               |
| 0.34264012  | Proliferation/Metastasis |
| 0.003400218 | Proliferation/Metastasis |
| 0.055644104 | TME                      |

|             |                          |
|-------------|--------------------------|
| 0.619605793 | TME                      |
| 0.984397711 | TME                      |
| 0.671111712 | TME                      |
| 0.000482001 | Metabolism               |
| 9.77E-05    | Proliferation/Metastasis |
| 0.000339363 | Metabolism               |
| 2.45E-07    | Metabolism               |
| 0.820781276 | Proliferation/Metastasis |
| 0.847810786 | Proliferation/Metastasis |
| 0.011079858 | Metabolism               |
| 0.006149518 | Metabolism               |
| 0.942167969 | Metabolism               |
| 0.028453535 | Metabolism               |
| 0.081545362 | TME                      |
| 0.676462998 | TME                      |
| 0.707291681 | TME                      |
| 0.200823095 | TME                      |
| 0.03734715  | TME                      |
| 0.54446119  | Metabolism               |
| 0.025035849 | Metabolism               |
| 0.00499649  | Metabolism               |
| 0.034662139 | Metabolism               |
| 0.298144451 | Metabolism               |
| 0.312346726 | TME                      |
| 0.178636932 | TME                      |
| 0.314225772 | TME                      |
| 0.259432122 | TME                      |
| 0.834796947 | TME                      |
| 0.807985861 | TME                      |
| 0.760068378 | TME                      |
| 0.836136552 | TME                      |
| 0.586259996 | TME                      |
| 0.802939521 | Proliferation/Metastasis |
| 0.090237564 | Proliferation/Metastasis |
| 4.48E-07    | Metabolism               |
| 0.069258853 | Metabolism               |
| 0.413038659 | TME                      |
| 0.911007685 | Metabolism               |
| 0.682914958 | Metabolism               |
| 0.606765419 | TME                      |
| 0.794093539 | Proliferation/Metastasis |
| 0.066978534 | Proliferation/Metastasis |
| 0.547536737 | TME                      |

|             |                          |
|-------------|--------------------------|
| 0.398207162 | Metabolism               |
| 0.359160781 | Metabolism               |
| 0.417430675 | Proliferation/Metastasis |
| 0.531648504 | Proliferation/Metastasis |
| 0.337619218 | TME                      |
| 0.52293647  | TME                      |
| 0.398029539 | TME                      |
| 0.615092025 | TME                      |
| 1.21E-07    | Proliferation/Metastasis |
| 0.125344815 | TME                      |
| 0.420961184 | TME                      |
| 0.252997673 | Metabolism               |
| 0.501457983 | TME                      |
| 0.725715124 | TME                      |
| 0.788722806 | TME                      |
| 0.079594434 | TME                      |
| 0.532657619 | Metabolism               |
| 0.576151261 | Metabolism               |
| 0.265851808 | Metabolism               |
| 0.127474104 | TME                      |
| 0.001210592 | Metabolism               |
| 0.526885295 | TME                      |
| 0.255287829 | TME                      |
| 0.102532213 | TME                      |
| 0.509992434 | TME                      |
| 0.823739415 | TME                      |
| 0.016186634 | Metabolism               |
| 0.88446409  | Proliferation/Metastasis |
| 1.09E-05    | Metabolism               |
| 0.397757359 | Proliferation/Metastasis |
| 0.821961999 | Metabolism               |
| 0.398558374 | Metabolism               |
| 0.068677433 | Metabolism               |
| 0.104039228 | Metabolism               |
| 0.010987345 | Metabolism               |
| 0.502166621 | Metabolism               |
| 0.806672856 | Metabolism               |
| 0.993109038 | Metabolism               |
| 2.21E-06    | Metabolism               |
| 0.49903226  | Metabolism               |
| 0.011118092 | Metabolism               |
| 0.317669003 | Metabolism               |
| 3.18E-05    | Metabolism               |

|             |                          |
|-------------|--------------------------|
| 2.13E-07    | Metabolism               |
| 0.354685218 | TME                      |
| 0.003793991 | Proliferation/Metastasis |
| 0.011269025 | Metabolism               |
| 0.559103644 | Proliferation/Metastasis |
| 0.458358174 | TME                      |
| 0.204825337 | Proliferation/Metastasis |
| 0.312663424 | Proliferation/Metastasis |
| 0.834334073 | TME                      |
| 0.051467936 | TME                      |
| 0.26659084  | Metabolism               |
| 0.146374177 | Metabolism               |
| 0.864891313 | Proliferation/Metastasis |
| 0.001128614 | Proliferation/Metastasis |
| 0.254933453 | Proliferation/Metastasis |
| 0.001110481 | Metabolism               |
| 0.095723895 | Metabolism               |
| 0.164011963 | Metabolism               |
| 0.00064967  | Proliferation/Metastasis |
| 0.642248724 | TME                      |
| 0.673983805 | TME                      |
| 0.001165508 | Metabolism               |
| 0.626277387 | Proliferation/Metastasis |
| 0.594939084 | Metabolism               |
| 0.360550302 | TME                      |
| 0.278455446 | TME                      |
| 0.085479891 | TME                      |
| 0.366014679 | TME                      |
| 0.548061416 | Metabolism               |
| 0.000180922 | TME                      |
| 0.139323221 | Proliferation/Metastasis |
| 0.830562574 | TME                      |
| 0.236977967 | Proliferation/Metastasis |
| 0.00025911  | Proliferation/Metastasis |
| 2.78E-06    | Metabolism               |
| 0.004157334 | Proliferation/Metastasis |
| 0.773498838 | TME                      |
| 4.76E-10    | Metabolism               |
| 0.282794869 | TME                      |
| 0.289238358 | TME                      |
| 0.57709548  | TME                      |
| 0.778700324 | TME                      |
| 0.055555434 | TME                      |

|             |                          |
|-------------|--------------------------|
| 0.204562785 | TME                      |
| 0.296863084 | Metabolism               |
| 0.913475262 | TME                      |
| 0.949658497 | Metabolism               |
| 0.049873657 | Metabolism               |
| 0.990409904 | Proliferation/Metastasis |
| 0.720491586 | Proliferation/Metastasis |
| 0.020158074 | Metabolism               |
| 0.000889387 | Metabolism               |
| 0.21080044  | Metabolism               |
| 0.790588421 | Metabolism               |
| 0.191880983 | Proliferation/Metastasis |
| 0.317556886 | Proliferation/Metastasis |
| 0.0105118   | Metabolism               |
| 7.75E-06    | Metabolism               |
| 0.000149793 | Metabolism               |
| 0.009873296 | TME                      |
| 0.044943291 | Metabolism               |
| 0.759510294 | Metabolism               |
| 0.160014338 | Metabolism               |
| 0.554926196 | Metabolism               |
| 2.22E-07    | Proliferation/Metastasis |
| 0.139155753 | Metabolism               |
| 0.979704187 | Metabolism               |
| 6.98E-05    | Metabolism               |
| 0.000185314 | Metabolism               |
| 0.389166175 | Metabolism               |
| 0.006026503 | Metabolism               |
| 0.096754439 | Proliferation/Metastasis |
| 0.491715114 | Metabolism               |
| 0.001173281 | Metabolism               |
| 0.037787118 | Proliferation/Metastasis |
| 8.19E-06    | Metabolism               |
| 0.028276252 | Metabolism               |
| 0.001730928 | Metabolism               |
| 0.018192227 | Metabolism               |
| 0.391403456 | Metabolism               |
| 0.897470134 | Metabolism               |
| 0.000260345 | Metabolism               |
| 0.852676514 | Metabolism               |
| 0.976260131 | TME                      |
| 0.868431283 | TME                      |
| 0.290189877 | TME                      |



|             |                          |
|-------------|--------------------------|
| 0.362642328 | TME                      |
| 0.491353608 | TME                      |
| 0.173648104 | Metabolism               |
| 0.000952806 | Metabolism               |
| 0.649952307 | Proliferation/Metastasis |
| 0.090910247 | Metabolism               |
| 0.66026212  | Proliferation/Metastasis |
| 0.010590112 | Metabolism               |
| 0.001253541 | TME                      |
| 0.317367931 | Metabolism               |
| 0.184419008 | Metabolism               |
| 0.191765809 | Metabolism               |
| 0.031022807 | Metabolism               |
| 0.924913152 | TME                      |
| 0.532475869 | TME                      |
| 0.660824125 | Proliferation/Metastasis |
| 0.001405787 | Metabolism               |
| 0.000542084 | Proliferation/Metastasis |
| 0.275508931 | Proliferation/Metastasis |
| 0.299013359 | TME                      |
| 0.149565587 | TME                      |
| 0.366848751 | TME                      |
| 0.904461775 | TME                      |
| 0.229084065 | Metabolism               |
| 0.420763242 | Proliferation/Metastasis |
| 0.007536147 | Metabolism               |
| 0.092740377 | Metabolism               |
| 0.930786455 | Proliferation/Metastasis |
| 0.103720773 | Proliferation/Metastasis |
| 1.12E-05    | Metabolism               |
| 0.075825208 | Metabolism               |
| 0.19158649  | Metabolism               |
| 0.779181728 | Metabolism               |
| 0.678179335 | TME                      |
| 0.128248842 | TME                      |
| 0.737109212 | TME                      |
| 0.016810546 | TME                      |
| 1.66E-09    | TME                      |
| 0.390747099 | Metabolism               |
| 0.21969798  | Metabolism               |
| 0.049497112 | Metabolism               |
| 0.59739809  | Metabolism               |
| 0.458233428 | Metabolism               |

|             |                          |
|-------------|--------------------------|
| 0.457851436 | TME                      |
| 0.761673956 | TME                      |
| 0.116215707 | TME                      |
| 0.561723357 | TME                      |
| 0.817735362 | TME                      |
| 0.741617359 | TME                      |
| 0.808655838 | TME                      |
| 0.245182184 | TME                      |
| 0.888958387 | TME                      |
| 0.490204833 | Proliferation/Metastasis |
| 0.073717742 | Proliferation/Metastasis |
| 0.715638585 | Metabolism               |
| 0.513246702 | Metabolism               |
| 0.558002401 | TME                      |
| 0.002310944 | Metabolism               |
| 0.015319282 | Metabolism               |
| 0.230147523 | TME                      |
| 0.78301823  | Proliferation/Metastasis |
| 0.260413872 | Proliferation/Metastasis |
| 0.23356458  | TME                      |
| 0.029347744 | Metabolism               |
| 0.048165612 | Metabolism               |
| 0.076027297 | Proliferation/Metastasis |
| 0.192623618 | Proliferation/Metastasis |
| 0.618101849 | TME                      |
| 0.276139338 | TME                      |
| 0.737389082 | TME                      |
| 0.829614893 | TME                      |
| 0.562222276 | Proliferation/Metastasis |
| 0.861540125 | TME                      |
| 0.16896121  | TME                      |
| 0.010274849 | Metabolism               |
| 0.475209051 | TME                      |
| 0.240954576 | TME                      |
| 0.779557828 | TME                      |
| 0.067135126 | TME                      |
| 0.993909042 | Metabolism               |
| 0.512128245 | Metabolism               |
| 0.024925661 | Metabolism               |
| 0.256008634 | TME                      |
| 0.006648428 | Metabolism               |
| 0.333078193 | TME                      |
| 0.870050735 | TME                      |

|             |                          |
|-------------|--------------------------|
| 0.473361253 | TME                      |
| 0.526894234 | TME                      |
| 0.646206071 | TME                      |
| 0.253267556 | Metabolism               |
| 0.022801057 | Proliferation/Metastasis |
| 0.009915141 | Metabolism               |
| 0.000255278 | Proliferation/Metastasis |
| 2.98E-05    | Metabolism               |
| 0.016079247 | Metabolism               |
| 0.005281248 | Metabolism               |
| 0.045119697 | Metabolism               |
| 0.460140694 | Metabolism               |
| 0.020974848 | Metabolism               |
| 0.006973766 | Metabolism               |
| 0.011028106 | Metabolism               |
| 0.43574316  | Metabolism               |
| 0.023894786 | Metabolism               |
| 0.00069005  | Metabolism               |
| 0.3207241   | Metabolism               |
| 0.150837678 | Metabolism               |
| 0.421341965 | Metabolism               |
| 0.241010004 | TME                      |
| 0.061228173 | Proliferation/Metastasis |
| 0.978267686 | Metabolism               |
| 0.03090017  | Proliferation/Metastasis |
| 0.622296609 | TME                      |
| 0.461944823 | Proliferation/Metastasis |
| 0.135949158 | Proliferation/Metastasis |
| 0.336339173 | TME                      |
| 0.339849696 | TME                      |
| 0.379930976 | Metabolism               |
| 0.300235661 | Metabolism               |
| 0.988122859 | Proliferation/Metastasis |
| 0.241817834 | Proliferation/Metastasis |
| 0.196524684 | Proliferation/Metastasis |
| 0.002255678 | Metabolism               |
| 0.519243466 | Metabolism               |
| 0.257686364 | Metabolism               |
| 3.05E-05    | Proliferation/Metastasis |
| 0.349117763 | TME                      |
| 0.16987602  | TME                      |
| 0.407553041 | Metabolism               |
| 0.34621743  | Proliferation/Metastasis |

|             |                          |
|-------------|--------------------------|
| 0.400431742 | Metabolism               |
| 0.516108124 | TME                      |
| 0.637957747 | TME                      |
| 0.067808353 | TME                      |
| 0.461564533 | TME                      |
| 0.007922861 | Metabolism               |
| 0.28213851  | TME                      |
| 0.133195592 | Proliferation/Metastasis |
| 0.028375999 | TME                      |
| 0.305675653 | Proliferation/Metastasis |
| 0.493161092 | Proliferation/Metastasis |
| 0.906140888 | Metabolism               |
| 0.521593689 | Proliferation/Metastasis |
| 0.422293592 | TME                      |
| 0.899845175 | Metabolism               |
| 0.046427389 | TME                      |
| 0.58344922  | TME                      |
| 0.084243192 | TME                      |
| 0.403647859 | TME                      |
| 0.501633588 | TME                      |
| 0.802110564 | TME                      |
| 0.000209354 | Metabolism               |
| 0.002764357 | TME                      |
| 0.516173721 | Metabolism               |
| 0.109300524 | Metabolism               |
| 0.39215876  | Proliferation/Metastasis |
| 0.761372573 | Proliferation/Metastasis |
| 0.830969212 | Metabolism               |
| 0.423491681 | Metabolism               |
| 0.712098608 | Metabolism               |
| 0.019075501 | Metabolism               |
| 0.002986725 | Proliferation/Metastasis |
| 0.115380409 | Proliferation/Metastasis |
| 0.724932009 | Metabolism               |
| 0.284602485 | Metabolism               |
| 0.000418217 | Metabolism               |
| 0.201016537 | TME                      |
| 0.024061179 | Metabolism               |
| 0.807866991 | Metabolism               |
| 0.423408008 | Metabolism               |
| 0.781993355 | Metabolism               |
| 0.077845002 | Proliferation/Metastasis |
| 0.18259785  | Metabolism               |

|             |                          |
|-------------|--------------------------|
| 0.273566996 | Metabolism               |
| 0.366931211 | Metabolism               |
| 0.679271168 | Metabolism               |
| 0.846000629 | Metabolism               |
| 0.406181276 | Metabolism               |
| 0.855633115 | Proliferation/Metastasis |
| 0.16950304  | Metabolism               |
| 0.112339775 | Metabolism               |
| 0.090187649 | Proliferation/Metastasis |
| 0.668844618 | Metabolism               |
| 0.970117657 | Metabolism               |
| 0.014912872 | Metabolism               |
| 0.305905943 | Metabolism               |
| 0.457222208 | Metabolism               |
| 0.000436052 | Metabolism               |
| 0.13181515  | Metabolism               |
| 0.226255038 | Metabolism               |
| 0.54319527  | TME                      |
| 0.337976173 | TME                      |
| 0.692949185 | TME                      |
| 0.77330779  | TME                      |
| 0.494122195 | TME                      |
| 0.060456287 | Metabolism               |
| 0.689634939 | Metabolism               |
| 0.42060161  | Proliferation/Metastasis |
| 8.33E-05    | Metabolism               |
| 0.140251883 | Proliferation/Metastasis |
| 0.65156108  | Metabolism               |
| 0.017460819 | TME                      |
| 0.055512057 | Metabolism               |
| 0.603543671 | Metabolism               |
| 0.744467042 | Metabolism               |
| 0.468390161 | Metabolism               |
| 0.615553418 | TME                      |
| 0.331892752 | TME                      |
| 0.000103106 | Proliferation/Metastasis |
| 0.351660249 | Metabolism               |
| 0.347126141 | Proliferation/Metastasis |
| 0.598826852 | Proliferation/Metastasis |
| 0.099794964 | TME                      |
| 0.194157715 | TME                      |
| 0.069628164 | TME                      |
| 0.013331851 | TME                      |

|             |                          |
|-------------|--------------------------|
| 0.787197911 | Metabolism               |
| 0.179294203 | Proliferation/Metastasis |
| 0.027092106 | Metabolism               |
| 0.001669732 | Metabolism               |
| 0.912172801 | Proliferation/Metastasis |
| 0.022096807 | Proliferation/Metastasis |
| 0.000141349 | Metabolism               |
| 0.314753152 | Metabolism               |
| 0.575083687 | Metabolism               |
| 0.099803584 | Metabolism               |
| 0.810463217 | TME                      |
| 0.006842787 | TME                      |
| 0.693415225 | TME                      |
| 0.256675566 | TME                      |
| 0.007330762 | TME                      |
| 0.744946909 | Metabolism               |
| 0.954245996 | Metabolism               |
| 0.009252927 | Metabolism               |
| 0.746630947 | Metabolism               |
| 0.084494279 | Metabolism               |
| 0.85726971  | TME                      |
| 0.160074463 | TME                      |
| 0.003090658 | TME                      |
| 0.164502212 | TME                      |
| 0.024539961 | TME                      |
| 0.062390134 | TME                      |
| 0.086123539 | TME                      |
| 0.005347351 | TME                      |
| 0.191449468 | TME                      |
| 0.105161835 | Proliferation/Metastasis |
| 2.79E-05    | Proliferation/Metastasis |
| 0.153979614 | Metabolism               |
| 0.894284415 | Metabolism               |
| 0.006255012 | TME                      |
| 0.652543488 | Metabolism               |
| 3.72E-05    | Metabolism               |
| 0.016648498 | TME                      |
| 0.129898415 | Proliferation/Metastasis |
| 0.96411249  | Proliferation/Metastasis |
| 0.026754153 | TME                      |
| 0.305986915 | Metabolism               |
| 0.045585391 | Metabolism               |
| 0.002944773 | Proliferation/Metastasis |

|             |                          |
|-------------|--------------------------|
| 0.059479538 | Proliferation/Metastasis |
| 0.758138679 | TME                      |
| 0.031232585 | TME                      |
| 0.326965677 | TME                      |
| 0.165649339 | TME                      |
| 0.0001817   | Proliferation/Metastasis |
| 0.579105462 | TME                      |
| 0.008093352 | TME                      |
| 0.585217871 | Metabolism               |
| 0.477216425 | TME                      |
| 0.37282509  | TME                      |
| 0.040509781 | TME                      |
| 0.0111733   | TME                      |
| 0.002167922 | Metabolism               |
| 0.070530811 | Metabolism               |
| 0.332760597 | Metabolism               |
| 0.057402752 | TME                      |
| 0.004374632 | Metabolism               |
| 0.129397999 | TME                      |
| 0.068802159 | TME                      |
| 0.039800748 | TME                      |
| 0.08849019  | TME                      |
| 0.220461148 | TME                      |
| 0.008417086 | Metabolism               |
| 0.000362624 | Proliferation/Metastasis |
| 0.003113416 | Metabolism               |
| 0.130500407 | Proliferation/Metastasis |
| 0.225974863 | Metabolism               |
| 0.951810105 | Metabolism               |
| 0.064626726 | Metabolism               |
| 0.00022998  | Metabolism               |
| 0.59942126  | Metabolism               |
| 6.79E-08    | Metabolism               |
| 0.020568402 | Metabolism               |
| 0.019853448 | Metabolism               |
| 0.001712473 | Metabolism               |
| 3.13E-05    | Metabolism               |
| 0.001987097 | Metabolism               |
| 0.022593082 | Metabolism               |
| 0.151699254 | Metabolism               |
| 0.848935558 | Metabolism               |
| 0.045334173 | TME                      |
| 0.51837907  | Proliferation/Metastasis |

|             |                          |
|-------------|--------------------------|
| 0.092182274 | Metabolism               |
| 0.029351342 | Proliferation/Metastasis |
| 0.118677059 | TME                      |
| 0.101264602 | Proliferation/Metastasis |
| 0.105092534 | Proliferation/Metastasis |
| 0.179973203 | TME                      |
| 0.081888491 | TME                      |
| 9.11E-05    | Metabolism               |
| 0.050586596 | Metabolism               |
| 0.396783346 | Proliferation/Metastasis |
| 0.002252936 | Proliferation/Metastasis |
| 0.334700537 | Proliferation/Metastasis |
| 0.079837633 | Metabolism               |
| 0.905247907 | Metabolism               |
| 0.119134115 | Metabolism               |
| 0.000307676 | Proliferation/Metastasis |
| 0.065048141 | TME                      |
| 0.026341714 | TME                      |
| 0.000616453 | Metabolism               |
| 0.305539116 | Proliferation/Metastasis |
| 0.020531356 | Metabolism               |
| 0.304835857 | TME                      |
| 0.327574155 | TME                      |
| 0.00112342  | TME                      |
| 0.200650829 | TME                      |
| 0.063974394 | Metabolism               |
| 0.00074575  | TME                      |
| 0.00040362  | Proliferation/Metastasis |
| 0.052204241 | TME                      |
| 0.664304912 | Proliferation/Metastasis |
| 0.011061752 | Proliferation/Metastasis |
| 0.023111896 | Metabolism               |
| 0.017595029 | Proliferation/Metastasis |
| 0.065303198 | TME                      |
| 0.617453415 | Metabolism               |
| 0.444092946 | TME                      |
| 0.657218714 | TME                      |
| 0.353018836 | TME                      |
| 0.043191591 | TME                      |
| 0.001910679 | TME                      |
| 0.180513192 | TME                      |
| 0.004025081 | Metabolism               |
| 0.05984931  | TME                      |



|             |                          |
|-------------|--------------------------|
| 0.186817587 | Metabolism               |
| 0.849198324 | Metabolism               |
| 0.672074336 | Proliferation/Metastasis |
| 0.014167554 | Proliferation/Metastasis |
| 0.046335349 | Metabolism               |
| 0.002034747 | Metabolism               |
| 2.96E-06    | Metabolism               |
| 0.006455077 | Metabolism               |
| 0.124551692 | Proliferation/Metastasis |
| 0.001776635 | Proliferation/Metastasis |
| 0.653541135 | Metabolism               |
| 0.919220364 | Metabolism               |
| 0.294613617 | Metabolism               |
| 0.01799756  | TME                      |
| 0.00025836  | Metabolism               |
| 0.781926958 | Metabolism               |
| 0.732301854 | Metabolism               |
| 0.163447309 | Metabolism               |
| 0.245249221 | Proliferation/Metastasis |
| 0.035903083 | Metabolism               |
| 0.006462165 | Metabolism               |
| 0.000996617 | Metabolism               |
| 0.206947145 | Metabolism               |
| 0.11562896  | Metabolism               |
| 0.754961374 | Metabolism               |
| 0.701326812 | Proliferation/Metastasis |
| 0.329545554 | Metabolism               |
| 3.32E-06    | Metabolism               |
| 0.510492906 | Proliferation/Metastasis |
| 0.001408666 | Metabolism               |
| 0.001411313 | Metabolism               |
| 0.803821477 | Metabolism               |
| 0.548564637 | Metabolism               |
| 0.129487187 | Metabolism               |
| 0.005362817 | Metabolism               |
| 0.09860523  | Metabolism               |
| 0.700333406 | Metabolism               |
| 0.027074556 | TME                      |
| 0.286411909 | TME                      |
| 0.37203726  | TME                      |
| 0.007182018 | TME                      |
| 0.037291803 | TME                      |
| 0.005491629 | Metabolism               |

|             |                          |
|-------------|--------------------------|
| 0.091903683 | Metabolism               |
| 0.628721694 | Proliferation/Metastasis |
| 0.000148546 | Metabolism               |
| 0.783561836 | Proliferation/Metastasis |
| 0.306779831 | Metabolism               |
| 0.292002461 | TME                      |
| 2.35E-05    | Metabolism               |
| 0.874494834 | Metabolism               |
| 0.006434659 | Metabolism               |
| 0.045511016 | Metabolism               |
| 0.008348291 | TME                      |
| 0.000264564 | TME                      |
| 0.22816683  | Proliferation/Metastasis |
| 0.467268966 | Metabolism               |
| 0.498590728 | Proliferation/Metastasis |
| 0.357953615 | Proliferation/Metastasis |
| 0.912707521 | TME                      |
| 0.862498987 | TME                      |
| 0.64019593  | TME                      |
| 0.399646803 | TME                      |
| 0.009853723 | Metabolism               |
| 4.96E-05    | Proliferation/Metastasis |
| 0.096547202 | Metabolism               |
| 0.341290358 | Metabolism               |
| 0.000269362 | Proliferation/Metastasis |
| 0.834912922 | Proliferation/Metastasis |
| 0.060819906 | Metabolism               |
| 7.51E-05    | Metabolism               |
| 0.071514317 | Metabolism               |
| 0.525816217 | Metabolism               |
| 0.818225735 | TME                      |
| 0.227029482 | TME                      |
| 0.714850023 | TME                      |
| 0.747513588 | TME                      |
| 0.539927053 | TME                      |
| 0.198795902 | Metabolism               |
| 0.003908632 | Metabolism               |
| 0.451966993 | Metabolism               |
| 0.672088016 | Metabolism               |
| 0.601334802 | Metabolism               |
| 0.638514856 | TME                      |
| 0.714904828 | TME                      |
| 0.658871187 | TME                      |

|             |                          |
|-------------|--------------------------|
| 0.418438902 | TME                      |
| 0.497842655 | TME                      |
| 0.506515331 | TME                      |
| 0.725618738 | TME                      |
| 0.746066886 | TME                      |
| 0.794037653 | TME                      |
| 2.67E-06    | Proliferation/Metastasis |
| 0.000132509 | Proliferation/Metastasis |
| 0.059868302 | Metabolism               |
| 0.001270186 | Metabolism               |
| 0.368586328 | TME                      |
| 0.458138552 | Metabolism               |
| 0.337812598 | Metabolism               |
| 0.91924749  | TME                      |
| 2.13E-07    | Proliferation/Metastasis |
| 3.76E-08    | Proliferation/Metastasis |
| 0.689237903 | TME                      |
| 0.118406133 | Metabolism               |
| 0.011781144 | Metabolism               |
| 2.83E-07    | Proliferation/Metastasis |
| 0.951009316 | Proliferation/Metastasis |
| 0.518888019 | TME                      |
| 0.664650901 | TME                      |
| 0.597994219 | TME                      |
| 0.237504641 | TME                      |
| 0.000695072 | Proliferation/Metastasis |
| 0.298632152 | TME                      |
| 0.946691299 | TME                      |
| 0.031014019 | Metabolism               |
| 0.360690607 | TME                      |
| 0.604766263 | TME                      |
| 0.342014834 | TME                      |
| 0.034951024 | TME                      |
| 0.000942171 | Metabolism               |
| 0.976207761 | Metabolism               |
| 0.008859118 | Metabolism               |
| 0.177333785 | TME                      |
| 0.257804361 | Metabolism               |
| 0.736681151 | TME                      |
| 0.260043001 | TME                      |
| 0.969056984 | TME                      |
| 0.049236161 | TME                      |
| 0.033825653 | TME                      |

|             |                          |
|-------------|--------------------------|
| 0.00142321  | Metabolism               |
| 6.32E-07    | Proliferation/Metastasis |
| 0.229144169 | Metabolism               |
| 0.970565058 | Proliferation/Metastasis |
| 0.260499209 | Metabolism               |
| 0.449757883 | Metabolism               |
| 0.133972593 | Metabolism               |
| 0.01270935  | Metabolism               |
| 0.002353405 | Metabolism               |
| 0.770913766 | Metabolism               |
| 0.155923803 | Metabolism               |
| 0.097415812 | Metabolism               |
| 0.008729292 | Metabolism               |
| 0.087986916 | Metabolism               |
| 0.921031432 | Metabolism               |
| 0.915392168 | Metabolism               |
| 0.501426592 | Metabolism               |
| 0.000573822 | Metabolism               |
| 0.506747686 | TME                      |
| 0.196042351 | Proliferation/Metastasis |
| 0.082779799 | Metabolism               |
| 0.850608598 | Proliferation/Metastasis |
| 0.387723679 | TME                      |
| 0.558631997 | Proliferation/Metastasis |
| 0.240389522 | Proliferation/Metastasis |
| 0.401261234 | TME                      |
| 0.616769718 | TME                      |
| 0.124468439 | Metabolism               |
| 0.880959368 | Metabolism               |
| 0.003996515 | Proliferation/Metastasis |
| 0.000909671 | Proliferation/Metastasis |
| 0.44341912  | Proliferation/Metastasis |
| 0.267724695 | Metabolism               |
| 0.760386342 | Metabolism               |
| 0.000863453 | Metabolism               |
| 0.000978773 | Proliferation/Metastasis |
| 0.825695653 | TME                      |
| 0.470693676 | TME                      |
| 0.000336338 | Metabolism               |
| 0.17579248  | Proliferation/Metastasis |
| 0.435945962 | Metabolism               |
| 0.299785721 | TME                      |
| 0.574381581 | TME                      |

|             |                          |
|-------------|--------------------------|
| 0.580096438 | TME                      |
| 0.25879578  | TME                      |
| 0.304083413 | Metabolism               |
| 0.735864338 | TME                      |
| 0.018958426 | Proliferation/Metastasis |
| 0.411533925 | TME                      |
| 0.443898867 | Proliferation/Metastasis |
| 1.81E-05    | Proliferation/Metastasis |
| 0.472043829 | Metabolism               |
| 8.06E-07    | Proliferation/Metastasis |
| 0.517465844 | TME                      |
| 0.991409812 | Metabolism               |
| 0.47815288  | TME                      |
| 0.027901031 | TME                      |
| 0.027073034 | TME                      |
| 0.688324206 | TME                      |
| 0.274072699 | TME                      |
| 0.74607891  | TME                      |
| 0.433934061 | Metabolism               |
| 0.566882805 | TME                      |
| 0.100979372 | Metabolism               |
| 0.039783361 | Metabolism               |
| 0.375259972 | Proliferation/Metastasis |
| 0.766433902 | Proliferation/Metastasis |
| 3.74E-09    | Metabolism               |
| 0.002259071 | Metabolism               |
| 0.328793994 | Metabolism               |
| 0.002209579 | Metabolism               |
| 0.701355673 | Proliferation/Metastasis |
| 0.636458165 | Proliferation/Metastasis |
| 0.654983715 | Metabolism               |
| 0.85286132  | Metabolism               |
| 0.058648807 | Metabolism               |
| 0.34222786  | TME                      |
| 0.1028879   | Metabolism               |
| 0.296949085 | Metabolism               |
| 0.145303196 | Metabolism               |
| 0.002114496 | Metabolism               |
| 0.330484306 | Proliferation/Metastasis |
| 0.001744888 | Metabolism               |
| 0.136469811 | Metabolism               |
| 0.296258775 | Metabolism               |
| 4.40E-10    | Metabolism               |

|             |                          |
|-------------|--------------------------|
| 9.21E-10    | Metabolism               |
| 0.009893534 | Metabolism               |
| 0.000987877 | Proliferation/Metastasis |
| 0.665597515 | Metabolism               |
| 0.010504308 | Metabolism               |
| 0.00720244  | Proliferation/Metastasis |
| 0.017545834 | Metabolism               |
| 0.667199436 | Metabolism               |
| 0.000156461 | Metabolism               |
| 0.512246605 | Metabolism               |
| 0.031628604 | Metabolism               |
| 0.583230786 | Metabolism               |
| 0.653364172 | Metabolism               |
| 0.132908698 | Metabolism               |
| 0.812523739 | TME                      |
| 0.808234342 | TME                      |
| 0.37473987  | TME                      |
| 0.363504312 | TME                      |
| 0.118696036 | TME                      |
| 0.003298558 | Metabolism               |
| 0.000506    | Metabolism               |
| 0.327548206 | Proliferation/Metastasis |
| 0.024353828 | Metabolism               |
| 0.520244826 | Proliferation/Metastasis |
| 0.101784109 | Metabolism               |
| 0.090909824 | TME                      |
| 0.658072553 | Metabolism               |
| 0.000218561 | Metabolism               |
| 0.640276696 | Metabolism               |
| 0.415910174 | Metabolism               |
| 0.615393201 | TME                      |
| 0.32206142  | TME                      |
| 0.120602815 | Proliferation/Metastasis |
| 0.309107272 | Metabolism               |
| 0.023500606 | Proliferation/Metastasis |
| 0.819945794 | Proliferation/Metastasis |
| 0.007749112 | TME                      |
| 2.30E-05    | TME                      |
| 0.048013771 | TME                      |
| 0.143217407 | TME                      |
| 0.693913447 | Metabolism               |
| 0.047657927 | Proliferation/Metastasis |
| 0.041383747 | Metabolism               |

|             |                          |
|-------------|--------------------------|
| 0.204566886 | Metabolism               |
| 0.000965583 | Proliferation/Metastasis |
| 0.315657273 | Proliferation/Metastasis |
| 0.094710964 | Metabolism               |
| 0.794473486 | Metabolism               |
| 0.117100515 | Metabolism               |
| 0.075686845 | Metabolism               |
| 0.007410555 | TME                      |
| 0.012088315 | TME                      |
| 4.10E-06    | TME                      |
| 0.025961348 | TME                      |
| 0.414009734 | TME                      |
| 0.026313958 | Metabolism               |
| 0.315928547 | Metabolism               |
| 0.053053777 | Metabolism               |
| 0.128412799 | Metabolism               |
| 0.11421189  | Metabolism               |
| 5.47E-05    | TME                      |
| 0.123162354 | TME                      |
| 0.021874977 | TME                      |
| 0.557144352 | TME                      |
| 0.937242562 | TME                      |
| 0.191871717 | TME                      |
| 0.136438606 | TME                      |
| 0.771371208 | TME                      |
| 0.007719058 | TME                      |
| 0.015010151 | Proliferation/Metastasis |
| 0.018716441 | Proliferation/Metastasis |
| 0.21322998  | Metabolism               |
| 0.765584367 | Metabolism               |
| 0.692439392 | TME                      |
| 0.061276751 | Metabolism               |
| 0.57980484  | Metabolism               |
| 0.209475597 | TME                      |
| 0.254258287 | Proliferation/Metastasis |
| 0.334077839 | Proliferation/Metastasis |
| 0.555192682 | TME                      |
| 0.283814984 | Metabolism               |
| 0.382713565 | Metabolism               |
| 0.005154286 | Proliferation/Metastasis |
| 0.239250964 | Proliferation/Metastasis |
| 0.003952404 | TME                      |
| 0.048667584 | TME                      |

|             |                          |
|-------------|--------------------------|
| 0.009803338 | TME                      |
| 0.131244233 | TME                      |
| 0.000652313 | Proliferation/Metastasis |
| 6.82E-05    | TME                      |
| 0.26410307  | TME                      |
| 0.506941044 | Metabolism               |
| 1.33E-06    | TME                      |
| 2.32E-05    | TME                      |
| 0.078648451 | TME                      |
| 0.16189572  | TME                      |
| 0.136191532 | Metabolism               |
| 0.014262512 | Metabolism               |
| 0.004178149 | Metabolism               |
| 0.009305723 | TME                      |
| 0.612223966 | Metabolism               |
| 0.020550414 | TME                      |
| 0.003735025 | TME                      |
| 0.220247179 | TME                      |
| 0.732122724 | TME                      |
| 0.187893035 | TME                      |
| 0.01567719  | Metabolism               |
| 0.000363535 | Proliferation/Metastasis |
| 0.407508219 | Metabolism               |
| 0.658783514 | Proliferation/Metastasis |
| 0.144611108 | Metabolism               |
| 0.042928809 | Metabolism               |
| 2.17E-05    | Metabolism               |
| 0.038706153 | Metabolism               |
| 0.65733503  | Metabolism               |
| 0.005441297 | Metabolism               |
| 0.027352568 | Metabolism               |
| 0.160616709 | Metabolism               |
| 0.163490953 | Metabolism               |
| 0.642436391 | Metabolism               |
| 0.156529719 | Metabolism               |
| 0.2243889   | Metabolism               |
| 0.240278363 | Metabolism               |
| 0.895073332 | Metabolism               |
| 0.047517045 | TME                      |
| 0.693576344 | Proliferation/Metastasis |
| 0.673479805 | Metabolism               |
| 0.045130622 | Proliferation/Metastasis |
| 0.308101307 | TME                      |



|             |                          |
|-------------|--------------------------|
| 0.051699935 | Proliferation/Metastasis |
| 0.075964521 | Proliferation/Metastasis |
| 0.014794595 | TME                      |
| 0.809851043 | TME                      |
| 1.64E-05    | Metabolism               |
| 0.001596558 | Metabolism               |
| 0.000180748 | Proliferation/Metastasis |
| 0.966027198 | Proliferation/Metastasis |
| 0.001031663 | Proliferation/Metastasis |
| 0.477321338 | Metabolism               |
| 0.237621626 | Metabolism               |
| 0.946706056 | Metabolism               |
| 0.767199271 | Proliferation/Metastasis |
| 0.00454829  | TME                      |
| 0.005694217 | TME                      |
| 0.00285735  | Metabolism               |
| 0.070654623 | Proliferation/Metastasis |
| 0.000633116 | Metabolism               |
| 0.000422359 | TME                      |
| 1.04E-05    | TME                      |
| 0.64211928  | TME                      |
| 0.031117876 | TME                      |
| 0.811965478 | Metabolism               |
| 1.15E-06    | TME                      |
| 0.001771898 | Proliferation/Metastasis |
| 0.001594746 | TME                      |
| 0.394456092 | Proliferation/Metastasis |
| 2.27E-05    | Proliferation/Metastasis |
| 4.67E-08    | Metabolism               |
| 0.018162027 | Proliferation/Metastasis |
| 0.027576576 | TME                      |
| 0.249017768 | Metabolism               |
| 0.138234689 | TME                      |
| 0.009591168 | TME                      |
| 0.037986542 | TME                      |
| 0.015656223 | TME                      |
| 1.39E-11    | TME                      |
| 0.051985586 | TME                      |
| 0.383959299 | Metabolism               |
| 0.003540584 | TME                      |
| 0.365818608 | Metabolism               |
| 9.70E-06    | Metabolism               |
| 0.045458263 | Proliferation/Metastasis |

|             |                          |
|-------------|--------------------------|
| 0.708487595 | Proliferation/Metastasis |
| 0.013683553 | Metabolism               |
| 0.040267297 | Metabolism               |
| 1.31E-09    | Metabolism               |
| 0.984573781 | Metabolism               |
| 0.546478794 | Proliferation/Metastasis |
| 0.000187619 | Proliferation/Metastasis |
| 0.000183021 | Metabolism               |
| 0.130190825 | Metabolism               |
| 0.116691068 | Metabolism               |
| 0.30757851  | TME                      |
| 0.714278659 | Metabolism               |
| 0.272917711 | Metabolism               |
| 0.010146289 | Metabolism               |
| 0.060426212 | Metabolism               |
| 3.77E-05    | Proliferation/Metastasis |
| 0.637670014 | Metabolism               |
| 0.15620082  | Metabolism               |
| 6.65E-06    | Metabolism               |
| 0.792161071 | Metabolism               |
| 0.220103488 | Metabolism               |
| 0.570466465 | Metabolism               |
| 0.91691501  | Proliferation/Metastasis |
| 0.330649287 | Metabolism               |
| 0.059336088 | Metabolism               |
| 8.15E-10    | Proliferation/Metastasis |
| 0.890643667 | Metabolism               |
| 0.032784651 | Metabolism               |
| 0.013656416 | Metabolism               |
| 0.103582881 | Metabolism               |
| 0.564996221 | Metabolism               |
| 0.723585592 | Metabolism               |
| 0.030860002 | Metabolism               |
| 0.057232228 | Metabolism               |
| 0.027568456 | TME                      |
| 0.011958089 | TME                      |
| 0.590769603 | TME                      |
| 0.58946993  | TME                      |
| 0.157769368 | TME                      |
| 4.81E-07    | Metabolism               |
| 1.54E-06    | Metabolism               |
| 0.000979603 | Proliferation/Metastasis |
| 0.978654145 | Metabolism               |

|             |                          |
|-------------|--------------------------|
| 0.039239869 | Proliferation/Metastasis |
| 0.380391703 | Metabolism               |
| 0.113307997 | TME                      |
| 0.11607775  | Metabolism               |
| 0.043033547 | Metabolism               |
| 0.394381959 | Metabolism               |
| 0.000277858 | Metabolism               |
| 0.201778569 | TME                      |
| 0.356680729 | TME                      |
| 0.719349613 | Proliferation/Metastasis |
| 0.352940904 | Metabolism               |
| 0.027043165 | Proliferation/Metastasis |
| 0.032888889 | Proliferation/Metastasis |
| 0.397332979 | TME                      |
| 0.180821886 | TME                      |
| 0.001613221 | TME                      |
| 0.08484769  | TME                      |
| 0.043249476 | Metabolism               |
| 0.133963176 | Proliferation/Metastasis |
| 0.533186317 | Metabolism               |
| 0.000261172 | Metabolism               |
| 0.286239656 | Proliferation/Metastasis |
| 0.002007026 | Proliferation/Metastasis |
| 1.42E-06    | Metabolism               |
| 0.907222879 | Metabolism               |
| 0.888808155 | Metabolism               |
| 0.084516823 | Metabolism               |
| 0.286239881 | TME                      |
| 0.044013689 | TME                      |
| 0.905696498 | TME                      |
| 1.70E-05    | TME                      |
| 2.65E-12    | TME                      |
| 0.383703889 | Metabolism               |
| 0.6197764   | Metabolism               |
| 0.043720106 | Metabolism               |
| 0.007534539 | Metabolism               |
| 0.081103789 | Metabolism               |
| 0.414134258 | TME                      |
| 0.689235654 | TME                      |
| 0.013468567 | TME                      |
| 0.448206195 | TME                      |
| 0.003714344 | TME                      |
| 0.055841842 | TME                      |

|             |                          |
|-------------|--------------------------|
| 0.052225664 | TME                      |
| 0.329279316 | TME                      |
| 0.716543989 | TME                      |
| 0.005341454 | Proliferation/Metastasis |
| 4.50E-05    | Proliferation/Metastasis |
| 0.756260083 | Metabolism               |
| 0.42926921  | Metabolism               |
| 0.659342374 | TME                      |
| 0.281367651 | Metabolism               |
| 0.272220276 | Metabolism               |
| 0.001358853 | TME                      |
| 0.277396152 | Proliferation/Metastasis |
| 0.406735747 | Proliferation/Metastasis |
| 0.768164737 | TME                      |
| 0.267904933 | Metabolism               |
| 0.010432083 | Metabolism               |
| 0.004568606 | Proliferation/Metastasis |
| 0.05233168  | Proliferation/Metastasis |
| 0.307219969 | TME                      |
| 0.005574263 | TME                      |
| 0.17709268  | TME                      |
| 0.006739924 | TME                      |
| 0.125806347 | Proliferation/Metastasis |
| 0.11527825  | TME                      |
| 2.41E-06    | TME                      |
| 0.309913162 | Metabolism               |
| 0.089048312 | TME                      |
| 0.047357396 | TME                      |
| 0.23501987  | TME                      |
| 0.782849336 | TME                      |
| 0.025134399 | Metabolism               |
| 0.047916963 | Metabolism               |
| 0.052874971 | Metabolism               |
| 0.004217453 | TME                      |
| 0.006450009 | Metabolism               |
| 0.342514591 | TME                      |
| 0.477740468 | TME                      |
| 0.042254081 | TME                      |
| 0.906715454 | TME                      |
| 0.668724855 | TME                      |
| 0.06940321  | Metabolism               |
| 2.27E-05    | Proliferation/Metastasis |
| 7.64E-05    | Metabolism               |

|             |                          |
|-------------|--------------------------|
| 0.136869317 | Proliferation/Metastasis |
| 5.93E-06    | Metabolism               |
| 0.615735734 | Metabolism               |
| 0.107855975 | Metabolism               |
| 0.031132513 | Metabolism               |
| 0.551320577 | Metabolism               |
| 5.04E-09    | Metabolism               |
| 0.022298624 | Metabolism               |
| 0.000126943 | Metabolism               |
| 0.002060333 | Metabolism               |
| 7.67E-06    | Metabolism               |
| 0.000183576 | Metabolism               |
| 0.065625694 | Metabolism               |
| 0.064452481 | Metabolism               |
| 0.964680679 | Metabolism               |
| 9.69E-06    | TME                      |
| 0.831067908 | Proliferation/Metastasis |
| 0.507124453 | Metabolism               |
| 0.013500546 | Proliferation/Metastasis |
| 0.382704796 | TME                      |
| 0.048369374 | Proliferation/Metastasis |
| 0.00234159  | Proliferation/Metastasis |
| 0.002640096 | TME                      |
| 7.51E-05    | TME                      |
| 1.95E-06    | Metabolism               |
| 0.211660901 | Metabolism               |
| 0.706036911 | Proliferation/Metastasis |
| 5.92E-05    | Proliferation/Metastasis |
| 0.071531893 | Proliferation/Metastasis |
| 0.524169728 | Metabolism               |
| 0.597611213 | Metabolism               |
| 0.00021957  | Metabolism               |
| 1.53E-06    | Proliferation/Metastasis |
| 0.000290128 | TME                      |
| 2.59E-05    | TME                      |
| 0.186474935 | Metabolism               |
| 0.778342498 | Proliferation/Metastasis |
| 0.528845133 | Metabolism               |
| 0.642392712 | TME                      |
| 0.595285485 | TME                      |
| 6.99E-06    | TME                      |
| 0.008920374 | TME                      |
| 0.019657202 | Metabolism               |

|             |                          |
|-------------|--------------------------|
| 0.008437418 | TME                      |
| 1.20E-05    | Proliferation/Metastasis |
| 5.69E-06    | TME                      |
| 0.804387223 | Proliferation/Metastasis |
| 0.890062841 | Proliferation/Metastasis |
| 0.024507614 | Metabolism               |
| 0.051088267 | Proliferation/Metastasis |
| 0.002846548 | TME                      |
| 0.914652328 | Metabolism               |
| 0.455945811 | TME                      |
| 0.574017553 | TME                      |
| 0.000885056 | TME                      |
| 0.032795646 | TME                      |
| 0.069507506 | TME                      |
| 0.043953003 | TME                      |
| 0.026495917 | Metabolism               |
| 5.43E-07    | TME                      |
| 0.687758468 | Metabolism               |
| 0.301803104 | Metabolism               |
| 0.075985034 | Proliferation/Metastasis |
| 0.427314977 | Proliferation/Metastasis |
| 0.153773622 | Metabolism               |
| 0.090152859 | Metabolism               |
| 0.265546038 | Metabolism               |
| 1.58E-05    | Metabolism               |
| 0.19318083  | Proliferation/Metastasis |
| 0.005978751 | Proliferation/Metastasis |
| 0.048941127 | Metabolism               |
| 0.524961794 | Metabolism               |
| 0.006663605 | Metabolism               |
| 0.002956977 | TME                      |
| 0.02807896  | Metabolism               |
| 0.719971034 | Metabolism               |
| 0.053974158 | Metabolism               |
| 0.02936542  | Metabolism               |
| 0.465446514 | Proliferation/Metastasis |
| 0.021836267 | Metabolism               |
| 0.222757763 | Metabolism               |
| 0.000241762 | Metabolism               |
| 0.36670913  | Metabolism               |
| 0.196932295 | Metabolism               |
| 0.156082068 | Metabolism               |
| 0.1046213   | Proliferation/Metastasis |

|             |                          |
|-------------|--------------------------|
| 0.356132172 | Metabolism               |
| 0.000194723 | Metabolism               |
| 0.110999123 | Proliferation/Metastasis |
| 0.005231163 | Metabolism               |
| 0.004610109 | Metabolism               |
| 0.281866743 | Metabolism               |
| 0.814432706 | Metabolism               |
| 0.284137301 | Metabolism               |
| 0.076163021 | Metabolism               |
| 0.077392726 | Metabolism               |
| 0.001483328 | Metabolism               |
| 0.107345799 | TME                      |
| 0.256348988 | TME                      |
| 0.055072843 | TME                      |
| 0.00431058  | TME                      |
| 0.010841766 | TME                      |
| 0.390932712 | Metabolism               |
| 0.030683332 | Metabolism               |
| 0.107003229 | Proliferation/Metastasis |
| 0.0010729   | Metabolism               |
| 0.138702191 | Proliferation/Metastasis |
| 0.506836981 | Metabolism               |
| 0.899307123 | TME                      |
| 0.015489985 | Metabolism               |
| 0.028219924 | Metabolism               |
| 3.12E-09    | Metabolism               |
| 0.006155128 | Metabolism               |
| 0.000171819 | TME                      |
| 0.00663383  | TME                      |
| 0.026058247 | Proliferation/Metastasis |
| 0.91579419  | Metabolism               |
| 0.43549676  | Proliferation/Metastasis |
| 0.023875451 | Proliferation/Metastasis |
| 5.36E-06    | TME                      |
| 0.693418916 | TME                      |
| 0.772585333 | TME                      |
| 0.529761572 | TME                      |
| 0.007436307 | Metabolism               |
| 0.94725556  | Proliferation/Metastasis |
| 0.089285348 | Metabolism               |
| 0.238039349 | Metabolism               |
| 0.769704025 | Proliferation/Metastasis |
| 0.0038487   | Proliferation/Metastasis |

|             |                          |
|-------------|--------------------------|
| 0.093512959 | Metabolism               |
| 0.00917496  | Metabolism               |
| 0.004023332 | Metabolism               |
| 0.008042781 | Metabolism               |
| 0.008078509 | TME                      |
| 0.000203506 | TME                      |
| 0.023048031 | TME                      |
| 0.866294747 | TME                      |
| 0.42837292  | TME                      |
| 0.000163793 | Metabolism               |
| 0.055912247 | Metabolism               |
| 0.615477585 | Metabolism               |
| 0.485708522 | Metabolism               |
| 0.150422893 | Metabolism               |
| 0.00321811  | TME                      |
| 0.687332001 | TME                      |
| 0.006152863 | TME                      |
| 0.333018996 | TME                      |
| 0.80099245  | TME                      |
| 0.487187361 | TME                      |
| 0.503319382 | TME                      |
| 0.099610796 | TME                      |
| 0.117755387 | TME                      |
| 0.591109236 | Proliferation/Metastasis |
| 0.413402532 | Proliferation/Metastasis |
| 0.785974223 | Metabolism               |
| 0.100531028 | Metabolism               |
| 0.001439733 | TME                      |
| 0.029694568 | Metabolism               |
| 0.08978481  | Metabolism               |
| 0.06783747  | TME                      |
| 0.412808365 | Proliferation/Metastasis |
| 0.026283104 | Proliferation/Metastasis |
| 0.75271404  | TME                      |
| 0.004562108 | Metabolism               |
| 0.055873557 | Metabolism               |
| 0.010025267 | Proliferation/Metastasis |
| 0.001620521 | Proliferation/Metastasis |
| 0.568696042 | TME                      |
| 0.057361441 | TME                      |
| 0.417204255 | TME                      |
| 0.975714376 | TME                      |
| 0.948896962 | Proliferation/Metastasis |



|             |                          |
|-------------|--------------------------|
| 0.021523966 | TME                      |
| 0.783396168 | TME                      |
| 0.164877126 | Metabolism               |
| 0.079173493 | TME                      |
| 0.091840527 | TME                      |
| 0.080294624 | TME                      |
| 0.009145737 | TME                      |
| 0.526787759 | Metabolism               |
| 0.161335112 | Metabolism               |
| 0.042187697 | Metabolism               |
| 0.016261199 | TME                      |
| 0.163699715 | Metabolism               |
| 0.097024165 | TME                      |
| 0.005657026 | TME                      |
| 0.046966183 | TME                      |
| 0.38632061  | TME                      |
| 0.160270372 | TME                      |
| 0.387269271 | Metabolism               |
| 0.083405818 | Proliferation/Metastasis |
| 0.809822067 | Metabolism               |
| 0.00519234  | Proliferation/Metastasis |
| 0.830410739 | Metabolism               |
| 0.028743504 | Metabolism               |
| 0.034775999 | Metabolism               |
| 0.000218737 | Metabolism               |
| 0.749719935 | Metabolism               |
| 0.280426576 | Metabolism               |
| 0.13438576  | Metabolism               |
| 0.471704015 | Metabolism               |
| 0.930188261 | Metabolism               |
| 0.116828562 | Metabolism               |
| 0.317944123 | Metabolism               |
| 0.10708742  | Metabolism               |
| 0.277678407 | Metabolism               |
| 0.282972991 | Metabolism               |
| 0.619800549 | TME                      |
| 0.00342399  | Proliferation/Metastasis |
| 2.26E-07    | Metabolism               |
| 0.002372637 | Proliferation/Metastasis |
| 0.324107426 | TME                      |
| 0.009096246 | Proliferation/Metastasis |
| 0.450478937 | Proliferation/Metastasis |
| 0.84136     | TME                      |

|             |                          |
|-------------|--------------------------|
| 0.060451504 | TME                      |
| 0.103263803 | Metabolism               |
| 0.974633248 | Metabolism               |
| 0.005093398 | Proliferation/Metastasis |
| 0.51155044  | Proliferation/Metastasis |
| 0.00062595  | Proliferation/Metastasis |
| 0.009845336 | Metabolism               |
| 0.836700573 | Metabolism               |
| 0.007151585 | Metabolism               |
| 0.011143986 | Proliferation/Metastasis |
| 0.230013808 | TME                      |
| 0.218818163 | TME                      |
| 0.68109489  | Metabolism               |
| 0.009537591 | Proliferation/Metastasis |
| 0.606874663 | Metabolism               |
| 0.065946711 | TME                      |
| 0.011417078 | TME                      |
| 0.1273212   | TME                      |
| 0.085145411 | TME                      |
| 0.037150495 | Metabolism               |
| 0.132274058 | TME                      |
| 0.496239069 | Proliferation/Metastasis |
| 0.154242474 | TME                      |
| 0.083380467 | Proliferation/Metastasis |
| 0.780509757 | Proliferation/Metastasis |
| 0.008833505 | Metabolism               |
| 0.433679176 | Proliferation/Metastasis |
| 0.153365079 | TME                      |
| 0.884305    | Metabolism               |
| 0.361760513 | TME                      |
| 0.001510584 | TME                      |
| 0.000383775 | TME                      |
| 0.022460145 | TME                      |
| 0.232781512 | TME                      |
| 0.420271271 | TME                      |
| 0.261516128 | Metabolism               |
| 0.224016778 | TME                      |
| 0.000451209 | Metabolism               |
| 0.006167113 | Metabolism               |
| 0.618762762 | Proliferation/Metastasis |
| 3.51E-05    | Proliferation/Metastasis |
| 0.515806099 | Metabolism               |
| 0.703110512 | Metabolism               |

|             |                          |
|-------------|--------------------------|
| 0.192637136 | Metabolism               |
| 0.419505221 | Metabolism               |
| 0.000739507 | Proliferation/Metastasis |
| 0.649636184 | Proliferation/Metastasis |
| 0.514645407 | Metabolism               |
| 0.005238661 | Metabolism               |
| 0.90804339  | Metabolism               |
| 0.003510884 | TME                      |
| 0.000350793 | Metabolism               |
| 0.317844702 | Metabolism               |
| 0.034449848 | Metabolism               |
| 0.006012296 | Metabolism               |
| 0.300001038 | Proliferation/Metastasis |
| 0.688547167 | Metabolism               |
| 3.50E-06    | Metabolism               |
| 0.051530473 | Metabolism               |
| 0.684646436 | Metabolism               |
| 0.500023538 | Metabolism               |
| 0.125944043 | Metabolism               |
| 7.34E-05    | Proliferation/Metastasis |
| 0.002888671 | Metabolism               |
| 0.001788825 | Metabolism               |
| 0.005114262 | Proliferation/Metastasis |
| 0.237820726 | Metabolism               |
| 0.009934844 | Metabolism               |
| 0.5015125   | Metabolism               |
| 0.008416607 | Metabolism               |
| 0.423278187 | Metabolism               |
| 2.15E-07    | Metabolism               |
| 0.934103256 | Metabolism               |
| 0.038823258 | Metabolism               |
| 0.017148626 | TME                      |
| 0.053691191 | TME                      |
| 0.932218387 | TME                      |
| 0.489770045 | TME                      |
| 0.067701346 | TME                      |
| 0.093112131 | Metabolism               |
| 0.12028964  | Metabolism               |
| 0.000302666 | Proliferation/Metastasis |
| 0.069099999 | Metabolism               |
| 0.173061052 | Proliferation/Metastasis |
| 0.049519422 | Metabolism               |
| 0.062455487 | TME                      |

|             |                          |
|-------------|--------------------------|
| 0.00296403  | Metabolism               |
| 0.485273731 | Metabolism               |
| 0.273988479 | Metabolism               |
| 0.180957275 | Metabolism               |
| 0.449666262 | TME                      |
| 0.005499068 | TME                      |
| 0.104645085 | Proliferation/Metastasis |
| 0.064550193 | Metabolism               |
| 0.001683071 | Proliferation/Metastasis |
| 0.001322518 | Proliferation/Metastasis |
| 0.000597363 | TME                      |
| 2.81E-08    | TME                      |
| 5.12E-07    | TME                      |
| 2.08E-07    | TME                      |
| 0.098526614 | Metabolism               |
| 1.58E-07    | Proliferation/Metastasis |
| 1.97E-05    | Metabolism               |
| 5.81E-08    | Metabolism               |
| 1.02E-12    | Proliferation/Metastasis |
| 7.86E-09    | Proliferation/Metastasis |
| 2.74E-15    | Metabolism               |
| 0.039612848 | Metabolism               |
| 0.627942703 | Metabolism               |
| 0.011725881 | Metabolism               |
| 2.29E-07    | TME                      |
| 1.04E-06    | TME                      |
| 7.77E-09    | TME                      |
| 0.00131538  | TME                      |
| 1.03E-13    | TME                      |
| 0.473446022 | Metabolism               |
| 0.099605974 | Metabolism               |
| 0.000880976 | Metabolism               |
| 0.000340229 | Metabolism               |
| 0.019548699 | Metabolism               |
| 3.58E-10    | TME                      |
| 2.67E-07    | TME                      |
| 3.18E-06    | TME                      |
| 0.000657565 | TME                      |
| 9.31E-10    | TME                      |
| 1.67E-07    | TME                      |
| 2.21E-08    | TME                      |
| 4.33E-07    | TME                      |
| 2.28E-08    | TME                      |

|             |                          |
|-------------|--------------------------|
| 3.62E-05    | Proliferation/Metastasis |
| 4.18E-05    | Proliferation/Metastasis |
| 0.194293701 | Metabolism               |
| 0.201107244 | Metabolism               |
| 0.37771738  | TME                      |
| 0.002371694 | Metabolism               |
| 0.011784675 | Metabolism               |
| 7.36E-13    | TME                      |
| 0.000176075 | Proliferation/Metastasis |
| 0.019990657 | Proliferation/Metastasis |
| 8.62E-06    | TME                      |
| 0.002352787 | Metabolism               |
| 2.68E-06    | Metabolism               |
| 0.000278733 | Proliferation/Metastasis |
| 0.492014984 | Proliferation/Metastasis |
| 0.000324054 | TME                      |
| 2.10E-08    | TME                      |
| 3.45E-06    | TME                      |
| 5.23E-09    | TME                      |
| 0.280601743 | Proliferation/Metastasis |
| 1.50E-07    | TME                      |
| 1.32E-11    | TME                      |
| 7.24E-07    | Metabolism               |
| 0.001606427 | TME                      |
| 4.96E-07    | TME                      |
| 3.01E-06    | TME                      |
| 0.025320831 | TME                      |
| 0.999228658 | Metabolism               |
| 0.207835094 | Metabolism               |
| 0.800487858 | Metabolism               |
| 1.51E-12    | TME                      |
| 0.001554782 | Metabolism               |
| 4.32E-08    | TME                      |
| 8.99E-10    | TME                      |
| 1.63E-06    | TME                      |
| 0.004298634 | TME                      |
| 0.051242253 | TME                      |
| 0.003170277 | Metabolism               |
| 2.41E-05    | Proliferation/Metastasis |
| 4.59E-06    | Metabolism               |
| 0.006607454 | Proliferation/Metastasis |
| 1.03E-10    | Metabolism               |
| 0.088567854 | Metabolism               |

|             |                          |
|-------------|--------------------------|
| 1.85E-05    | Metabolism               |
| 0.523262545 | Metabolism               |
| 0.252153448 | Metabolism               |
| 1.06E-08    | Metabolism               |
| 0.009644696 | Metabolism               |
| 0.014919012 | Metabolism               |
| 2.17E-09    | Metabolism               |
| 4.39E-05    | Metabolism               |
| 2.18E-09    | Metabolism               |
| 0.015998454 | Metabolism               |
| 0.492044775 | Metabolism               |
| 0.158125488 | Metabolism               |
| 6.76E-12    | TME                      |
| 3.12E-05    | Proliferation/Metastasis |
| 0.695436362 | Metabolism               |
| 0.004210113 | Proliferation/Metastasis |
| 1.45E-05    | TME                      |
| 1.13E-10    | Proliferation/Metastasis |
| 3.51E-10    | Proliferation/Metastasis |
| 1.51E-06    | TME                      |
| 5.33E-11    | TME                      |
| 4.62E-07    | Metabolism               |
| 0.043177932 | Metabolism               |
| 0.988691808 | Proliferation/Metastasis |
| 0.393348754 | Proliferation/Metastasis |
| 9.55E-10    | Proliferation/Metastasis |
| 0.000225624 | Metabolism               |
| 0.51070037  | Metabolism               |
| 3.19E-15    | Metabolism               |
| 1.10E-10    | Proliferation/Metastasis |
| 6.91E-12    | TME                      |
| 1.77E-12    | TME                      |
| 0.542678779 | Metabolism               |
| 0.195122128 | Proliferation/Metastasis |
| 0.02839767  | Metabolism               |
| 2.86E-05    | TME                      |
| 7.29E-07    | TME                      |
| 7.10E-10    | TME                      |
| 4.00E-08    | TME                      |
| 0.000243905 | Metabolism               |
| 0.298288902 | TME                      |
| 1.12E-08    | Proliferation/Metastasis |
| 5.95E-14    | TME                      |

|             |                          |
|-------------|--------------------------|
| 0.143325887 | Proliferation/Metastasis |
| 0.028206685 | Proliferation/Metastasis |
| 3.74E-05    | Metabolism               |
| 0.062836636 | Proliferation/Metastasis |
| 9.97E-12    | TME                      |
| 0.000250737 | Metabolism               |
| 9.42E-06    | TME                      |
| 5.87E-10    | TME                      |
| 0.000419276 | TME                      |
| 1.32E-08    | TME                      |
| 3.69E-06    | TME                      |
| 2.66E-08    | TME                      |
| 0.000215646 | Metabolism               |
| 4.99E-15    | TME                      |
| 1.25E-05    | Metabolism               |
| 2.55E-06    | Metabolism               |
| 3.61E-10    | Proliferation/Metastasis |
| 0.000467524 | Proliferation/Metastasis |
| 1.52E-06    | Metabolism               |
| 1.14E-07    | Metabolism               |
| 2.57E-06    | Metabolism               |
| 0.001152103 | Metabolism               |
| 1.04E-09    | Proliferation/Metastasis |
| 0.82856236  | Proliferation/Metastasis |
| 0.000562291 | Metabolism               |
| 0.005187407 | Metabolism               |
| 0.006949358 | Metabolism               |
| 1.60E-11    | TME                      |
| 0.411831661 | Metabolism               |
| 0.023703382 | Metabolism               |
| 0.711708102 | Metabolism               |
| 0.309615534 | Metabolism               |
| 0.0037097   | Proliferation/Metastasis |
| 0.002822272 | Metabolism               |
| 7.23E-06    | Metabolism               |
| 5.13E-06    | Metabolism               |
| 0.000846222 | Metabolism               |
| 0.001867721 | Metabolism               |
| 0.005973282 | Metabolism               |
| 0.582766401 | Proliferation/Metastasis |
| 1.14E-05    | Metabolism               |
| 5.12E-06    | Metabolism               |
| 0.004833616 | Proliferation/Metastasis |

|             |                          |
|-------------|--------------------------|
| 0.479693332 | Metabolism               |
| 4.11E-07    | Metabolism               |
| 0.001226897 | Metabolism               |
| 0.155115811 | Metabolism               |
| 0.011689392 | Metabolism               |
| 6.65E-07    | Metabolism               |
| 0.088600978 | Metabolism               |
| 0.026415492 | Metabolism               |
| 6.79E-10    | TME                      |
| 5.93E-10    | TME                      |
| 3.65E-07    | TME                      |
| 1.13E-09    | TME                      |
| 3.73E-08    | TME                      |
| 0.410114863 | Metabolism               |
| 0.601007414 | Metabolism               |
| 0.328339039 | Proliferation/Metastasis |
| 8.55E-06    | Metabolism               |
| 1.52E-07    | Proliferation/Metastasis |
| 0.656405417 | Metabolism               |
| 4.67E-06    | TME                      |
| 1.88E-05    | Metabolism               |
| 0.573690607 | Metabolism               |
| 5.97E-05    | Metabolism               |
| 0.000196592 | Metabolism               |
| 3.20E-09    | TME                      |
| 0.056424519 | TME                      |
| 0.000202866 | Proliferation/Metastasis |
| 8.68E-05    | Metabolism               |
| 3.86E-05    | Proliferation/Metastasis |
| 0.982696973 | Proliferation/Metastasis |
| 0.484196157 | TME                      |
| 0.640987107 | TME                      |
| 0.052194491 | TME                      |
| 0.352711787 | TME                      |
| 0.886377407 | Metabolism               |
| 0.010093677 | Proliferation/Metastasis |
| 6.51E-06    | Metabolism               |
| 0.61415781  | Metabolism               |
| 0.010941652 | Proliferation/Metastasis |
| 0.009296152 | Proliferation/Metastasis |
| 0.00593997  | Metabolism               |
| 0.003113349 | Metabolism               |
| 0.207834099 | Metabolism               |



|             |                          |
|-------------|--------------------------|
| 1.41E-05    | Metabolism               |
| 0.088471194 | TME                      |
| 0.397030497 | TME                      |
| 0.049085124 | TME                      |
| 0.719668842 | TME                      |
| 0.340288637 | TME                      |
| 0.001365222 | Metabolism               |
| 7.83E-05    | Metabolism               |
| 0.234922572 | Metabolism               |
| 4.45E-11    | Metabolism               |
| 0.732137669 | Metabolism               |
| 6.58E-08    | TME                      |
| 6.50E-06    | TME                      |
| 0.260132927 | TME                      |
| 0.517102369 | TME                      |
| 0.054778893 | TME                      |
| 0.467395816 | TME                      |
| 0.249975899 | TME                      |
| 0.963721056 | TME                      |
| 0.196571489 | TME                      |
| 0.38236565  | Proliferation/Metastasis |
| 1.04E-05    | Proliferation/Metastasis |
| 5.36E-05    | Metabolism               |
| 0.300758206 | Metabolism               |
| 0.449522577 | TME                      |
| 0.15344533  | Metabolism               |
| 3.03E-09    | Metabolism               |
| 0.057043091 | TME                      |
| 1.45E-05    | Proliferation/Metastasis |
| 2.03E-05    | Proliferation/Metastasis |
| 0.851787517 | TME                      |
| 6.71E-08    | Metabolism               |
| 1.69E-08    | Metabolism               |
| 0.398891041 | Proliferation/Metastasis |
| 0.015914488 | Proliferation/Metastasis |
| 0.054245796 | TME                      |
| 0.276377299 | TME                      |
| 0.186976668 | TME                      |
| 0.000717049 | TME                      |
| 0.000195769 | Proliferation/Metastasis |
| 8.37E-07    | TME                      |
| 0.237711296 | TME                      |
| 0.316253944 | Metabolism               |

|             |                          |
|-------------|--------------------------|
| 0.360460354 | TME                      |
| 0.115648263 | TME                      |
| 0.96082501  | TME                      |
| 0.004193179 | TME                      |
| 0.618140189 | Metabolism               |
| 1.46E-07    | Metabolism               |
| 4.60E-05    | Metabolism               |
| 0.000320999 | TME                      |
| 9.06E-12    | Metabolism               |
| 0.067611796 | TME                      |
| 0.006256587 | TME                      |
| 0.206940087 | TME                      |
| 0.232292292 | TME                      |
| 0.248437605 | TME                      |
| 0.00130072  | Metabolism               |
| 0.321186504 | Proliferation/Metastasis |
| 0.076139318 | Metabolism               |
| 4.01E-05    | Proliferation/Metastasis |
| 0.007160888 | Metabolism               |
| 0.000113388 | Metabolism               |
| 0.000360014 | Metabolism               |
| 4.85E-09    | Metabolism               |
| 3.81E-06    | Metabolism               |
| 0.028655268 | Metabolism               |
| 1.33E-06    | Metabolism               |
| 0.174179988 | Metabolism               |
| 0.874619096 | Metabolism               |
| 0.456605402 | Metabolism               |
| 0.958546469 | Metabolism               |
| 0.933144599 | Metabolism               |
| 0.02871859  | Metabolism               |
| 5.75E-09    | Metabolism               |
| 0.044179579 | TME                      |
| 0.000385187 | Proliferation/Metastasis |
| 2.43E-05    | Metabolism               |
| 0.72134316  | Proliferation/Metastasis |
| 0.669988689 | TME                      |
| 0.027176004 | Proliferation/Metastasis |
| 0.01788909  | Proliferation/Metastasis |
| 0.389448534 | TME                      |
| 0.965852699 | TME                      |
| 0.002578877 | Metabolism               |
| 9.79E-09    | Metabolism               |

|             |                          |
|-------------|--------------------------|
| 0.764208518 | Proliferation/Metastasis |
| 0.41843049  | Proliferation/Metastasis |
| 0.000774499 | Proliferation/Metastasis |
| 0.000152382 | Metabolism               |
| 0.037962048 | Metabolism               |
| 0.077762842 | Metabolism               |
| 0.515127437 | Proliferation/Metastasis |
| 0.10179656  | TME                      |
| 0.077494542 | TME                      |
| 0.404120111 | Metabolism               |
| 0.000321158 | Proliferation/Metastasis |
| 1.21E-09    | Metabolism               |
| 0.021474598 | TME                      |
| 0.247060887 | TME                      |
| 5.58E-05    | TME                      |
| 0.001917599 | TME                      |
| 3.62E-11    | Metabolism               |
| 0.477807132 | TME                      |
| 1.36E-05    | Proliferation/Metastasis |
| 0.396074029 | TME                      |
| 0.08856604  | Proliferation/Metastasis |
| 0.673345066 | Proliferation/Metastasis |
| 3.24E-10    | Metabolism               |
| 0.094699067 | Proliferation/Metastasis |
| 0.019042149 | TME                      |
| 0.00173437  | Metabolism               |
| 0.336704576 | TME                      |
| 0.000109485 | TME                      |
| 0.001044025 | TME                      |
| 0.258178104 | TME                      |
| 0.96299823  | TME                      |
| 0.078066195 | TME                      |
| 0.632932825 | Metabolism               |
| 0.112141261 | TME                      |
| 0.880357973 | Metabolism               |
| 0.164358872 | Metabolism               |
| 0.007092011 | Proliferation/Metastasis |
| 7.41E-05    | Proliferation/Metastasis |
| 7.16E-07    | Metabolism               |
| 0.570400027 | Metabolism               |
| 0.195610599 | Metabolism               |
| 5.02E-15    | Metabolism               |
| 0.983186093 | Proliferation/Metastasis |

|             |                          |
|-------------|--------------------------|
| 4.22E-06    | Proliferation/Metastasis |
| 0.268289846 | Metabolism               |
| 0.038901836 | Metabolism               |
| 0.006035442 | Metabolism               |
| 8.49E-05    | TME                      |
| 1.11E-10    | Metabolism               |
| 0.013166332 | Metabolism               |
| 0.09174858  | Metabolism               |
| 0.000821124 | Metabolism               |
| 0.222975524 | Proliferation/Metastasis |
| 7.82E-05    | Metabolism               |
| 0.110136966 | Metabolism               |
| 0.025547102 | Metabolism               |
| 0.370886073 | Metabolism               |
| 0.078672182 | Metabolism               |
| 1.63E-11    | Metabolism               |
| 0.001485999 | Proliferation/Metastasis |
| 0.000174611 | Metabolism               |
| 0.20573803  | Metabolism               |
| 0.005514184 | Proliferation/Metastasis |
| 1.83E-07    | Metabolism               |
| 1.17E-07    | Metabolism               |
| 6.38E-06    | Metabolism               |
| 5.93E-05    | Metabolism               |
| 0.128451031 | Metabolism               |
| 0.023183624 | Metabolism               |
| 0.066320763 | Metabolism               |
| 3.71E-09    | Metabolism               |
| 0.097875198 | TME                      |
| 0.274569496 | TME                      |
| 0.161905897 | TME                      |
| 0.436109086 | TME                      |
| 0.389050324 | TME                      |
| 0.188797426 | Metabolism               |
| 0.086250205 | Metabolism               |
| 1.42E-14    | Proliferation/Metastasis |
| 2.76E-06    | Metabolism               |
| 0.046340131 | Proliferation/Metastasis |
| 7.77E-07    | Metabolism               |
| 0.301631434 | TME                      |
| 4.21E-08    | Metabolism               |
| 1.52E-06    | Metabolism               |
| 0.00518798  | Metabolism               |

|             |                          |
|-------------|--------------------------|
| 4.42E-06    | Metabolism               |
| 0.02151315  | TME                      |
| 0.000689699 | TME                      |
| 0.01049753  | Proliferation/Metastasis |
| 0.012841047 | Metabolism               |
| 0.042881734 | Proliferation/Metastasis |
| 2.83E-07    | Proliferation/Metastasis |
| 0.587877469 | TME                      |
| 0.003595273 | TME                      |
| 0.004994001 | TME                      |
| 0.017673245 | TME                      |
| 0.853812399 | Metabolism               |
| 7.36E-10    | Proliferation/Metastasis |
| 0.002456258 | Metabolism               |
| 1.28E-14    | Metabolism               |
| 0.010280387 | Proliferation/Metastasis |
| 0.000820047 | Proliferation/Metastasis |
| 0.948200758 | Metabolism               |
| 0.065115236 | Metabolism               |
| 0.801678595 | Metabolism               |
| 0.396768839 | Metabolism               |
| 3.30E-05    | TME                      |
| 0.39437147  | TME                      |
| 0.042676812 | TME                      |
| 0.421640983 | TME                      |
| 2.50E-07    | TME                      |
| 5.04E-05    | Metabolism               |
| 0.50455934  | Metabolism               |
| 0.256654259 | Metabolism               |
| 1.09E-05    | Metabolism               |
| 0.692712489 | Metabolism               |
| 0.004375222 | TME                      |
| 4.39E-06    | TME                      |
| 0.206698711 | TME                      |
| 0.319118208 | TME                      |
| 0.001454935 | TME                      |
| 0.031761053 | TME                      |
| 0.019265432 | TME                      |
| 0.040637299 | TME                      |
| 0.021308364 | TME                      |
| 6.32E-05    | Proliferation/Metastasis |
| 0.00549708  | Proliferation/Metastasis |
| 0.042428105 | Metabolism               |

|             |                          |
|-------------|--------------------------|
| 2.66E-10    | Metabolism               |
| 0.497542815 | TME                      |
| 0.92171446  | Metabolism               |
| 0.061227882 | Metabolism               |
| 0.006113137 | TME                      |
| 1.37E-13    | Proliferation/Metastasis |
| 7.49E-08    | Proliferation/Metastasis |
| 0.38426052  | TME                      |
| 0.006494649 | Metabolism               |
| 5.48E-12    | Metabolism               |
| 9.28E-07    | Proliferation/Metastasis |
| 0.844402917 | Proliferation/Metastasis |
| 0.267758286 | TME                      |
| 0.015201172 | TME                      |
| 0.092634404 | TME                      |
| 0.000673514 | TME                      |
| 3.56E-07    | Proliferation/Metastasis |
| 0.242962365 | TME                      |
| 0.002594183 | TME                      |
| 0.009810236 | Metabolism               |
| 0.091614627 | TME                      |
| 0.026555603 | TME                      |
| 0.05159396  | TME                      |
| 0.000175399 | TME                      |
| 0.606023157 | Metabolism               |
| 2.19E-07    | Metabolism               |
| 0.001689588 | Metabolism               |
| 0.004988854 | TME                      |
| 0.003765543 | Metabolism               |
| 0.332734511 | TME                      |
| 0.162055067 | TME                      |
| 0.00359186  | TME                      |
| 0.092896406 | TME                      |
| 0.010057581 | TME                      |
| 6.96E-11    | Metabolism               |
| 2.48E-05    | Proliferation/Metastasis |
| 5.78E-08    | Metabolism               |
| 0.067590958 | Proliferation/Metastasis |
| 5.54E-11    | Metabolism               |
| 0.53060315  | Metabolism               |
| 0.182927999 | Metabolism               |
| 0.422111404 | Metabolism               |
| 0.000377651 | Metabolism               |

|             |                          |
|-------------|--------------------------|
| 6.25E-05    | Metabolism               |
| 0.007533349 | Metabolism               |
| 2.54E-08    | Metabolism               |
| 0.009425051 | Metabolism               |
| 0.010167923 | Metabolism               |
| 0.295244926 | Metabolism               |
| 0.695142175 | Metabolism               |
| 0.00354616  | Metabolism               |
| 0.218455347 | Metabolism               |
| 1.05E-05    | TME                      |
| 0.050361156 | Proliferation/Metastasis |
| 2.10E-09    | Metabolism               |
| 1.21E-06    | Proliferation/Metastasis |
| 0.074306347 | TME                      |
| 0.000337802 | Proliferation/Metastasis |
| 0.004275248 | Proliferation/Metastasis |
| 0.000395785 | TME                      |
| 0.00095291  | TME                      |
| 3.79E-11    | Metabolism               |
| 0.011325326 | Metabolism               |
| 3.00E-10    | Proliferation/Metastasis |
| 3.58E-15    | Proliferation/Metastasis |
| 0.126894308 | Proliferation/Metastasis |
| 0.002686188 | Metabolism               |
| 0.004882398 | Metabolism               |
| 1.10E-05    | Metabolism               |
| 0.002787229 | Proliferation/Metastasis |
| 0.001915891 | TME                      |
| 0.009278797 | TME                      |
| 0.216434411 | Metabolism               |
| 0.638188967 | Proliferation/Metastasis |
| 0.046026441 | Metabolism               |
| 0.424342321 | TME                      |
| 0.19228066  | TME                      |
| 2.54E-05    | TME                      |
| 0.018744018 | TME                      |
| 0.218134181 | Metabolism               |
| 2.46E-05    | TME                      |
| 0.655614668 | Proliferation/Metastasis |
| 0.000460996 | TME                      |
| 0.003409634 | Proliferation/Metastasis |
| 8.26E-22    | Proliferation/Metastasis |
| 0.020520861 | Metabolism               |

|             |                          |
|-------------|--------------------------|
| 6.94E-25    | Proliferation/Metastasis |
| 0.005361428 | TME                      |
| 1.94E-12    | Metabolism               |
| 0.21486494  | TME                      |
| 0.280613991 | TME                      |
| 0.05369234  | TME                      |
| 0.004456966 | TME                      |
| 1.36E-08    | TME                      |
| 0.016824285 | TME                      |
| 1.83E-07    | Metabolism               |
| 1.94E-06    | TME                      |
| 0.760197657 | Metabolism               |
| 0.59786456  | Metabolism               |
| 0.002699498 | Proliferation/Metastasis |
| 0.045484004 | Proliferation/Metastasis |
| 0.886266384 | Metabolism               |
| 0.050117667 | Metabolism               |
| 1.16E-05    | Metabolism               |
| 0.00205321  | Metabolism               |
| 0.04156654  | Proliferation/Metastasis |
| 0.620163817 | Proliferation/Metastasis |
| 0.02126458  | Metabolism               |
| 8.86E-07    | Metabolism               |
| 9.55E-08    | Metabolism               |
| 0.002222826 | TME                      |
| 0.000149169 | Metabolism               |
| 0.023862183 | Metabolism               |
| 0.401906158 | Metabolism               |
| 0.052541422 | Metabolism               |
| 7.46E-05    | Proliferation/Metastasis |
| 3.18E-08    | Metabolism               |
| 0.442701948 | Metabolism               |
| 4.04E-06    | Metabolism               |
| 9.77E-23    | Metabolism               |
| 4.43E-24    | Metabolism               |
| 0.318373199 | Metabolism               |
| 0.379815462 | Proliferation/Metastasis |
| 0.100976761 | Metabolism               |
| 7.25E-08    | Metabolism               |
| 0.025042035 | Proliferation/Metastasis |
| 0.013309558 | Metabolism               |
| 0.136557148 | Metabolism               |
| 0.651899791 | Metabolism               |



|             |                          |
|-------------|--------------------------|
| 0.944274296 | Metabolism               |
| 9.19E-08    | Metabolism               |
| 0.994937499 | Metabolism               |
| 0.241240721 | Metabolism               |
| 0.829181151 | Metabolism               |
| 0.026705425 | TME                      |
| 0.008716977 | TME                      |
| 0.003703382 | TME                      |
| 0.238899748 | TME                      |
| 0.031387016 | TME                      |
| 0.001755145 | Metabolism               |
| 4.92E-08    | Metabolism               |
| 0.210708075 | Proliferation/Metastasis |
| 2.10E-08    | Metabolism               |
| 0.000140925 | Proliferation/Metastasis |
| 4.38E-05    | Metabolism               |
| 4.76E-12    | TME                      |
| 2.08E-05    | Metabolism               |
| 0.443599065 | Metabolism               |
| 1.03E-09    | Metabolism               |
| 0.000252143 | Metabolism               |
| 0.855638827 | TME                      |
| 0.00036421  | TME                      |
| 0.020188334 | Proliferation/Metastasis |
| 0.004929919 | Metabolism               |
| 3.25E-09    | Proliferation/Metastasis |
| 0.16097472  | Proliferation/Metastasis |
| 0.227695914 | TME                      |
| 0.367872749 | TME                      |
| 0.635221598 | TME                      |
| 0.615521621 | TME                      |
| 0.995298469 | Metabolism               |
| 4.44E-05    | Proliferation/Metastasis |
| 0.481267258 | Metabolism               |
| 0.854676748 | Metabolism               |
| 0.387630257 | Proliferation/Metastasis |
| 0.08583305  | Proliferation/Metastasis |
| 0.008355823 | Metabolism               |
| 0.850577063 | Metabolism               |
| 0.278177269 | Metabolism               |
| 0.007993369 | Metabolism               |
| 0.228525364 | TME                      |
| 0.1687056   | TME                      |

|             |                          |
|-------------|--------------------------|
| 0.977191935 | TME                      |
| 0.872880347 | TME                      |
| 0.360216255 | TME                      |
| 0.019506831 | Metabolism               |
| 0.04833517  | Metabolism               |
| 0.080817942 | Metabolism               |
| 0.97206157  | Metabolism               |
| 0.019737826 | Metabolism               |
| 0.157342092 | TME                      |
| 0.410708391 | TME                      |
| 0.463853818 | TME                      |
| 0.781792191 | TME                      |
| 0.498494346 | TME                      |
| 0.833436725 | TME                      |
| 0.807207566 | TME                      |
| 0.491525262 | TME                      |
| 0.685361912 | TME                      |
| 0.235112015 | Proliferation/Metastasis |
| 0.106634284 | Proliferation/Metastasis |
| 0.171960165 | Metabolism               |
| 0.578632545 | Metabolism               |
| 0.840148573 | TME                      |
| 0.056179516 | Metabolism               |
| 6.46E-05    | Metabolism               |
| 0.964633168 | TME                      |
| 2.34E-08    | Proliferation/Metastasis |
| 0.581579605 | Proliferation/Metastasis |
| 0.036111887 | TME                      |
| 0.68794797  | Metabolism               |
| 0.013810684 | Metabolism               |
| 0.862346081 | Proliferation/Metastasis |
| 3.58E-09    | Proliferation/Metastasis |
| 0.260584163 | TME                      |
| 0.529884833 | TME                      |
| 0.686205192 | TME                      |
| 0.977279169 | TME                      |
| 0.004741522 | Proliferation/Metastasis |
| 0.069969309 | TME                      |
| 0.979083306 | TME                      |
| 0.612089316 | Metabolism               |
| 0.043779376 | TME                      |
| 0.463599316 | TME                      |
| 0.300267396 | TME                      |

|             |                          |
|-------------|--------------------------|
| 0.150003206 | TME                      |
| 0.071181173 | Metabolism               |
| 0.845148994 | Metabolism               |
| 0.166077495 | Metabolism               |
| 0.04694069  | TME                      |
| 0.235887144 | Metabolism               |
| 0.410025797 | TME                      |
| 0.762249556 | TME                      |
| 0.783194472 | TME                      |
| 0.032111315 | TME                      |
| 0.181286421 | TME                      |
| 0.002454134 | Metabolism               |
| 0.152351404 | Proliferation/Metastasis |
| 0.165869544 | Metabolism               |
| 0.251620395 | Proliferation/Metastasis |
| 0.033647923 | Metabolism               |
| 0.166551691 | Metabolism               |
| 0.034420008 | Metabolism               |
| 0.255254908 | Metabolism               |
| 0.096159292 | Metabolism               |
| 0.389630114 | Metabolism               |
| 0.50651821  | Metabolism               |
| 0.208251957 | Metabolism               |
| 0.187222017 | Metabolism               |
| 0.018274787 | Metabolism               |
| 0.951439786 | Metabolism               |
| 0.423840163 | Metabolism               |
| 0.539200036 | Metabolism               |
| 0.001061706 | Metabolism               |
| 0.780537521 | TME                      |
| 1.41E-05    | Proliferation/Metastasis |
| 0.101408808 | Metabolism               |
| 0.212788159 | Proliferation/Metastasis |
| 0.957195622 | TME                      |
| 0.083222802 | Proliferation/Metastasis |
| 0.281068287 | Proliferation/Metastasis |
| 0.658010301 | TME                      |
| 0.367169502 | TME                      |
| 2.64E-11    | Metabolism               |
| 1.08E-12    | Metabolism               |
| 0.065060502 | Proliferation/Metastasis |
| 0.148083313 | Proliferation/Metastasis |
| 0.096884324 | Proliferation/Metastasis |

|             |                          |
|-------------|--------------------------|
| 0.092984098 | Metabolism               |
| 0.012270006 | Metabolism               |
| 0.002766506 | Metabolism               |
| 0.872254513 | Proliferation/Metastasis |
| 0.83205422  | TME                      |
| 0.77375434  | TME                      |
| 0.200066825 | Metabolism               |
| 2.43E-07    | Proliferation/Metastasis |
| 1.62E-08    | Metabolism               |
| 0.962122217 | TME                      |
| 0.6927627   | TME                      |
| 0.754556215 | TME                      |
| 0.002338086 | TME                      |
| 0.233386806 | Metabolism               |
| 0.176483531 | TME                      |
| 1.06E-06    | Proliferation/Metastasis |
| 0.592469952 | TME                      |
| 2.27E-05    | Proliferation/Metastasis |
| 0.846720494 | Proliferation/Metastasis |
| 8.51E-06    | Metabolism               |
| 0.000141323 | Proliferation/Metastasis |
| 0.825616636 | TME                      |
| 0.114804279 | Metabolism               |
| 0.443930211 | TME                      |
| 0.817372226 | TME                      |
| 0.128215676 | TME                      |
| 0.990816399 | TME                      |
| 0.030762381 | TME                      |
| 0.775788666 | TME                      |
| 0.022278693 | Metabolism               |
| 0.667793181 | TME                      |
| 0.084016341 | Metabolism               |
| 0.001308599 | Metabolism               |
| 0.611490031 | Proliferation/Metastasis |
| 0.596250053 | Proliferation/Metastasis |
| 0.373731047 | Metabolism               |
| 0.391849199 | Metabolism               |
| 0.018001551 | Metabolism               |
| 2.66E-06    | Metabolism               |
| 0.499103585 | Proliferation/Metastasis |
| 0.000621037 | Proliferation/Metastasis |
| 0.753298    | Metabolism               |
| 0.889131891 | Metabolism               |

|             |                          |
|-------------|--------------------------|
| 0.077675067 | Metabolism               |
| 0.510624266 | TME                      |
| 0.583463026 | Metabolism               |
| 5.98E-05    | Metabolism               |
| 0.499422176 | Metabolism               |
| 8.11E-07    | Metabolism               |
| 0.020718021 | Proliferation/Metastasis |
| 0.225421183 | Metabolism               |
| 0.502092256 | Metabolism               |
| 0.649979813 | Metabolism               |
| 0.044939278 | Metabolism               |
| 0.000121739 | Metabolism               |
| 0.556780059 | Metabolism               |
| 0.305211142 | Proliferation/Metastasis |
| 0.735698157 | Metabolism               |
| 0.179523599 | Metabolism               |
| 1.13E-08    | Proliferation/Metastasis |
| 0.679374977 | Metabolism               |
| 1.66E-10    | Metabolism               |
| 0.000440507 | Metabolism               |
| 0.006622045 | Metabolism               |
| 0.02770346  | Metabolism               |
| 0.909489303 | Metabolism               |
| 0.581675404 | Metabolism               |
| 0.144811832 | Metabolism               |
| 0.649480194 | TME                      |
| 0.906417384 | TME                      |
| 0.552452387 | TME                      |
| 0.897943241 | TME                      |
| 0.507425654 | TME                      |
| 0.006706774 | Metabolism               |
| 0.881777918 | Metabolism               |
| 3.20E-07    | Proliferation/Metastasis |
| 0.005752402 | Metabolism               |
| 0.533625017 | Proliferation/Metastasis |
| 0.212152698 | Metabolism               |
| 0.228438877 | TME                      |
| 0.334169523 | Metabolism               |
| 0.099896238 | Metabolism               |
| 0.366185704 | Metabolism               |
| 0.689182248 | Metabolism               |
| 0.127446887 | TME                      |
| 5.58E-08    | TME                      |

|             |                          |
|-------------|--------------------------|
| 0.058787802 | Proliferation/Metastasis |
| 0.152979067 | Metabolism               |
| 0.420861712 | Proliferation/Metastasis |
| 0.356336745 | Proliferation/Metastasis |
| 0.00011888  | TME                      |
| 1.07E-15    | TME                      |
| 1.61E-14    | TME                      |
| 1.88E-11    | TME                      |
| 0.166506037 | Metabolism               |
| 1.28E-15    | Proliferation/Metastasis |
| 5.39E-05    | Metabolism               |
| 1.96E-19    | Metabolism               |
| 9.25E-05    | Proliferation/Metastasis |
| 5.73E-07    | Proliferation/Metastasis |
| 7.38E-10    | Metabolism               |
| 1.62E-05    | Metabolism               |
| 0.814404732 | Metabolism               |
| 0.222781365 | Metabolism               |
| 1.78E-10    | TME                      |
| 8.22E-08    | TME                      |
| 1.67E-11    | TME                      |
| 4.05E-08    | TME                      |
| 1.78E-10    | TME                      |
| 0.740397355 | Metabolism               |
| 0.690771461 | Metabolism               |
| 0.826970105 | Metabolism               |
| 0.370750333 | Metabolism               |
| 0.688397801 | Metabolism               |
| 0.003339904 | TME                      |
| 0.000832994 | TME                      |
| 3.26E-15    | TME                      |
| 3.31E-08    | TME                      |
| 2.57E-13    | TME                      |
| 1.99E-14    | TME                      |
| 3.12E-14    | TME                      |
| 1.08E-13    | TME                      |
| 1.72E-09    | TME                      |
| 0.178221083 | Proliferation/Metastasis |
| 2.26E-05    | Proliferation/Metastasis |
| 1.15E-05    | Metabolism               |
| 4.78E-07    | Metabolism               |
| 0.037529777 | TME                      |
| 0.002358873 | Metabolism               |

|             |                          |
|-------------|--------------------------|
| 1.67E-08    | Metabolism               |
| 3.37E-13    | TME                      |
| 3.76E-09    | Proliferation/Metastasis |
| 0.003237079 | Proliferation/Metastasis |
| 1.67E-07    | TME                      |
| 0.001085093 | Metabolism               |
| 5.97E-16    | Metabolism               |
| 0.963070523 | Proliferation/Metastasis |
| 0.297269089 | Proliferation/Metastasis |
| 8.67E-10    | TME                      |
| 1.03E-15    | TME                      |
| 1.77E-12    | TME                      |
| 1.14E-12    | TME                      |
| 0.056320092 | Proliferation/Metastasis |
| 0.053274511 | TME                      |
| 6.17E-19    | TME                      |
| 0.00137181  | Metabolism               |
| 1.91E-13    | TME                      |
| 8.98E-15    | TME                      |
| 3.45E-13    | TME                      |
| 0.900574311 | TME                      |
| 0.053776325 | Metabolism               |
| 0.435495253 | Metabolism               |
| 0.029583826 | Metabolism               |
| 1.04E-07    | TME                      |
| 4.60E-12    | Metabolism               |
| 1.31E-08    | TME                      |
| 0.001690092 | TME                      |
| 7.54E-14    | TME                      |
| 4.94E-06    | TME                      |
| 0.001051779 | TME                      |
| 9.65E-15    | Metabolism               |
| 0.081741886 | Proliferation/Metastasis |
| 3.57E-18    | Metabolism               |
| 0.177279642 | Proliferation/Metastasis |
| 3.26E-22    | Metabolism               |
| 0.001929314 | Metabolism               |
| 1.06E-06    | Metabolism               |
| 1.44E-07    | Metabolism               |
| 9.30E-12    | Metabolism               |
| 0.00096283  | Metabolism               |
| 0.399164518 | Metabolism               |
| 0.009765712 | Metabolism               |

|             |                          |
|-------------|--------------------------|
| 7.45E-08    | Metabolism               |
| 1.13E-10    | Metabolism               |
| 8.38E-07    | Metabolism               |
| 0.091762453 | Metabolism               |
| 0.449974856 | Metabolism               |
| 4.64E-05    | Metabolism               |
| 5.67E-20    | TME                      |
| 9.39E-12    | Proliferation/Metastasis |
| 0.613921053 | Metabolism               |
| 1.30E-14    | Proliferation/Metastasis |
| 1.24E-11    | TME                      |
| 3.61E-17    | Proliferation/Metastasis |
| 9.85E-14    | Proliferation/Metastasis |
| 9.08E-24    | TME                      |
| 5.66E-17    | TME                      |
| 1.34E-05    | Metabolism               |
| 0.470260752 | Metabolism               |
| 3.30E-07    | Proliferation/Metastasis |
| 0.010427214 | Proliferation/Metastasis |
| 6.40E-12    | Proliferation/Metastasis |
| 0.024960547 | Metabolism               |
| 0.019316792 | Metabolism               |
| 4.87E-09    | Metabolism               |
| 5.00E-19    | Proliferation/Metastasis |
| 1.71E-19    | TME                      |
| 7.41E-15    | TME                      |
| 0.000195777 | Metabolism               |
| 0.377349001 | Proliferation/Metastasis |
| 0.36769923  | Metabolism               |
| 7.81E-08    | TME                      |
| 1.29E-10    | TME                      |
| 0.05712214  | TME                      |
| 1.45E-10    | TME                      |
| 1.12E-07    | Metabolism               |
| 1.53E-05    | TME                      |
| 1.83E-05    | Proliferation/Metastasis |
| 6.47E-22    | TME                      |
| 0.196627452 | Proliferation/Metastasis |
| 7.63E-15    | Proliferation/Metastasis |
| 0.524133367 | Metabolism               |
| 0.000334804 | Proliferation/Metastasis |
| 5.81E-15    | TME                      |
| 1.26E-05    | Metabolism               |



|             |                          |
|-------------|--------------------------|
| 0.267748509 | TME                      |
| 1.83E-05    | TME                      |
| 0.955096005 | TME                      |
| 1.18E-15    | TME                      |
| 1.31E-17    | TME                      |
| 1.76E-13    | TME                      |
| 4.68E-19    | Metabolism               |
| 4.02E-22    | TME                      |
| 4.45E-09    | Metabolism               |
| 0.060463377 | Metabolism               |
| 4.86E-13    | Proliferation/Metastasis |
| 0.657365409 | Proliferation/Metastasis |
| 0.195995378 | Metabolism               |
| 5.26E-11    | Metabolism               |
| 0.002325755 | Metabolism               |
| 4.18E-16    | Metabolism               |
| 5.13E-13    | Proliferation/Metastasis |
| 0.079227467 | Proliferation/Metastasis |
| 1.65E-11    | Metabolism               |
| 3.56E-07    | Metabolism               |
| 1.70E-12    | Metabolism               |
| 0.001538079 | TME                      |
| 3.91E-05    | Metabolism               |
| 5.38E-09    | Metabolism               |
| 6.13E-06    | Metabolism               |
| 0.063712344 | Metabolism               |
| 5.98E-13    | Proliferation/Metastasis |
| 1.92E-09    | Metabolism               |
| 2.15E-06    | Metabolism               |
| 0.002521929 | Metabolism               |
| 0.000860181 | Metabolism               |
| 6.03E-06    | Metabolism               |
| 0.026629428 | Metabolism               |
| 2.09E-08    | Proliferation/Metastasis |
| 0.00032581  | Metabolism               |
| 1.61E-15    | Metabolism               |
| 0.237582925 | Proliferation/Metastasis |
| 0.03950069  | Metabolism               |
| 4.91E-07    | Metabolism               |
| 0.010810511 | Metabolism               |
| 8.82E-11    | Metabolism               |
| 0.001161862 | Metabolism               |
| 2.48E-07    | Metabolism               |

|             |                          |
|-------------|--------------------------|
| 0.200418367 | Metabolism               |
| 0.013285357 | Metabolism               |
| 4.10E-13    | TME                      |
| 2.36E-15    | TME                      |
| 9.48E-15    | TME                      |
| 1.26E-12    | TME                      |
| 3.04E-12    | TME                      |
| 0.466792123 | Metabolism               |
| 0.018402607 | Metabolism               |
| 7.92E-09    | Proliferation/Metastasis |
| 8.53E-12    | Metabolism               |
| 3.97E-16    | Proliferation/Metastasis |
| 0.007623357 | Metabolism               |
| 6.84E-10    | TME                      |
| 0.000276466 | Metabolism               |
| 0.021423719 | Metabolism               |
| 6.49E-21    | Metabolism               |
| 0.311000514 | Metabolism               |
| 1.40E-06    | TME                      |
| 0.155954914 | TME                      |
| 0.000169059 | Proliferation/Metastasis |
| 2.50E-05    | Metabolism               |
| 0.032350304 | Proliferation/Metastasis |
| 2.78E-08    | Proliferation/Metastasis |
| 0.572340993 | TME                      |
| 0.000424772 | TME                      |
| 1.63E-05    | TME                      |
| 3.74E-05    | TME                      |
| 0.797317471 | Metabolism               |
| 2.50E-05    | Proliferation/Metastasis |
| 0.002131508 | Metabolism               |
| 0.00026666  | Metabolism               |
| 0.063339131 | Proliferation/Metastasis |
| 0.363072312 | Proliferation/Metastasis |
| 0.029366742 | Metabolism               |
| 0.000293901 | Metabolism               |
| 0.165014088 | Metabolism               |
| 0.144344784 | Metabolism               |
| 0.001304092 | TME                      |
| 0.00076185  | TME                      |
| 9.25E-05    | TME                      |
| 8.85E-05    | TME                      |
| 0.001621769 | TME                      |

|             |                          |
|-------------|--------------------------|
| 0.001777213 | Metabolism               |
| 0.008685127 | Metabolism               |
| 0.782131811 | Metabolism               |
| 0.25529124  | Metabolism               |
| 0.008452218 | Metabolism               |
| 0.052512087 | TME                      |
| 0.003793477 | TME                      |
| 9.28E-07    | TME                      |
| 4.58E-05    | TME                      |
| 0.001421467 | TME                      |
| 3.43E-05    | TME                      |
| 5.60E-05    | TME                      |
| 7.81E-06    | TME                      |
| 0.000652855 | TME                      |
| 0.787570246 | Proliferation/Metastasis |
| 0.072008227 | Proliferation/Metastasis |
| 0.001736111 | Metabolism               |
| 0.032326964 | Metabolism               |
| 0.017052137 | TME                      |
| 0.255669394 | Metabolism               |
| 0.121893923 | Metabolism               |
| 0.000418009 | TME                      |
| 0.131142371 | Proliferation/Metastasis |
| 0.074687399 | Proliferation/Metastasis |
| 0.000711673 | TME                      |
| 0.084352546 | Metabolism               |
| 0.001227569 | Metabolism               |
| 0.298267266 | Proliferation/Metastasis |
| 0.024317055 | Proliferation/Metastasis |
| 6.85E-05    | TME                      |
| 1.21E-05    | TME                      |
| 2.77E-05    | TME                      |
| 0.000684446 | TME                      |
| 0.00074061  | Proliferation/Metastasis |
| 0.041602425 | TME                      |
| 2.53E-05    | TME                      |
| 0.128041727 | Metabolism               |
| 1.16E-06    | TME                      |
| 7.39E-06    | TME                      |
| 0.000152067 | TME                      |
| 0.71081789  | TME                      |
| 0.111170105 | Metabolism               |
| 0.034720373 | Metabolism               |

|             |                          |
|-------------|--------------------------|
| 0.129750409 | Metabolism               |
| 0.016766453 | TME                      |
| 0.001106142 | Metabolism               |
| 0.034520466 | TME                      |
| 0.073606748 | TME                      |
| 0.000340714 | TME                      |
| 0.22510009  | TME                      |
| 0.028201569 | TME                      |
| 0.001317776 | Metabolism               |
| 0.511403538 | Proliferation/Metastasis |
| 0.000431865 | Metabolism               |
| 0.266796749 | Proliferation/Metastasis |
| 0.003402937 | Metabolism               |
| 0.000443926 | Metabolism               |
| 0.001378218 | Metabolism               |
| 0.048309731 | Metabolism               |
| 0.000129764 | Metabolism               |
| 0.828162828 | Metabolism               |
| 8.22E-05    | Metabolism               |
| 0.722977391 | Metabolism               |
| 0.058697785 | Metabolism               |
| 0.289389133 | Metabolism               |
| 0.67678161  | Metabolism               |
| 0.604874108 | Metabolism               |
| 0.645254333 | Metabolism               |
| 0.00448099  | Metabolism               |
| 0.000112509 | TME                      |
| 0.007269839 | Proliferation/Metastasis |
| 0.040094359 | Metabolism               |
| 0.000921478 | Proliferation/Metastasis |
| 6.87E-06    | TME                      |
| 3.53E-05    | Proliferation/Metastasis |
| 0.000113746 | Proliferation/Metastasis |
| 1.86E-05    | TME                      |
| 4.25E-05    | TME                      |
| 0.277488615 | Metabolism               |
| 0.316610859 | Metabolism               |
| 0.00071792  | Proliferation/Metastasis |
| 0.92876037  | Proliferation/Metastasis |
| 0.003054761 | Proliferation/Metastasis |
| 0.202389518 | Metabolism               |
| 0.234030862 | Metabolism               |
| 0.401249505 | Metabolism               |

|             |                          |
|-------------|--------------------------|
| 0.030730481 | Proliferation/Metastasis |
| 0.000140516 | TME                      |
| 0.00060996  | TME                      |
| 0.031831352 | Metabolism               |
| 0.006894774 | Proliferation/Metastasis |
| 0.936606101 | Metabolism               |
| 0.002681854 | TME                      |
| 0.00028632  | TME                      |
| 0.985345023 | TME                      |
| 3.06E-05    | TME                      |
| 0.008657672 | Metabolism               |
| 5.10E-05    | TME                      |
| 0.732369079 | Proliferation/Metastasis |
| 3.26E-05    | TME                      |
| 0.036310562 | Proliferation/Metastasis |
| 0.003011539 | Proliferation/Metastasis |
| 0.658890164 | Metabolism               |
| 0.411202626 | Proliferation/Metastasis |
| 0.0001264   | TME                      |
| 0.260707868 | Metabolism               |
| 0.13807063  | TME                      |
| 0.035997729 | TME                      |
| 0.788939397 | TME                      |
| 1.79E-05    | TME                      |
| 1.12E-05    | TME                      |
| 0.000101696 | TME                      |
| 0.014927877 | Metabolism               |
| 0.000207493 | TME                      |
| 0.002689856 | Metabolism               |
| 0.475453037 | Metabolism               |
| 0.000662121 | Proliferation/Metastasis |
| 0.058887842 | Proliferation/Metastasis |
| 0.20567277  | Metabolism               |
| 0.053822429 | Metabolism               |
| 0.583282805 | Metabolism               |
| 0.013455145 | Metabolism               |
| 0.003466673 | Proliferation/Metastasis |
| 0.059360819 | Proliferation/Metastasis |
| 0.022446408 | Metabolism               |
| 0.153889751 | Metabolism               |
| 0.003356658 | Metabolism               |
| 0.420095704 | TME                      |
| 0.000195879 | Metabolism               |

|             |                          |
|-------------|--------------------------|
| 0.244771324 | Metabolism               |
| 0.396900287 | Metabolism               |
| 0.989977743 | Metabolism               |
| 1.28E-06    | Proliferation/Metastasis |
| 0.006174563 | Metabolism               |
| 0.092777142 | Metabolism               |
| 0.822520867 | Metabolism               |
| 0.002900073 | Metabolism               |
| 0.177701351 | Metabolism               |
| 0.005200868 | Metabolism               |
| 0.226040618 | Proliferation/Metastasis |
| 0.403649044 | Metabolism               |
| 0.019600111 | Metabolism               |
| 0.22148067  | Proliferation/Metastasis |
| 0.666808713 | Metabolism               |
| 0.616000331 | Metabolism               |
| 0.175895234 | Metabolism               |
| 0.000149032 | Metabolism               |
| 0.032467067 | Metabolism               |
| 0.462906769 | Metabolism               |
| 0.199695536 | Metabolism               |
| 0.00863629  | Metabolism               |
| 0.000268533 | TME                      |
| 6.54E-05    | TME                      |
| 0.000343329 | TME                      |
| 0.000344356 | TME                      |
| 7.82E-05    | TME                      |
| 0.369375651 | Metabolism               |
| 0.131685194 | Metabolism               |
| 0.005311509 | Proliferation/Metastasis |
| 0.132082827 | Metabolism               |
| 0.000555689 | Proliferation/Metastasis |
| 0.000542142 | Metabolism               |
| 0.073351069 | TME                      |
| 0.013528146 | Metabolism               |
| 0.080250715 | Metabolism               |
| 0.018742058 | Metabolism               |
| 0.249686867 | Metabolism               |
| 0.064512344 | TME                      |
| 0.001174166 | TME                      |
| 0.06917892  | Proliferation/Metastasis |
| 0.528923399 | Metabolism               |
| 0.91761307  | Proliferation/Metastasis |

|             |                          |
|-------------|--------------------------|
| 0.001159817 | Proliferation/Metastasis |
| 0.002104467 | TME                      |
| 0.915394492 | TME                      |
| 0.261424747 | TME                      |
| 0.820576849 | TME                      |
| 0.799360171 | Metabolism               |
| 0.404778021 | Proliferation/Metastasis |
| 1.81E-29    | Metabolism               |
| 0.957756858 | Metabolism               |
| 0.030986521 | Proliferation/Metastasis |
| 0.001557185 | Proliferation/Metastasis |
| 3.77E-29    | Metabolism               |
| 4.10E-08    | Metabolism               |
| 5.97E-09    | Metabolism               |
| 6.28E-06    | Metabolism               |
| 0.235628062 | TME                      |
| 1.96E-05    | TME                      |
| 0.265242082 | TME                      |
| 0.188675774 | TME                      |
| 4.34E-39    | TME                      |
| 1.51E-05    | Metabolism               |
| 0.149868651 | Metabolism               |
| 0.002116537 | Metabolism               |
| 0.253853724 | Metabolism               |
| 0.051599069 | Metabolism               |
| 8.56E-07    | TME                      |
| 0.296028171 | TME                      |
| 0.022479277 | TME                      |
| 0.669687492 | TME                      |
| 0.458313512 | TME                      |
| 0.593063384 | TME                      |
| 0.75809459  | TME                      |
| 0.189275829 | TME                      |
| 0.572183635 | TME                      |
| 4.84E-06    | Proliferation/Metastasis |
| 2.40E-07    | Proliferation/Metastasis |
| 0.201557642 | Metabolism               |
| 0.00245572  | Metabolism               |
| 0.899014399 | TME                      |
| 0.41531539  | Metabolism               |
| 0.039828628 | Metabolism               |
| 0.07000557  | TME                      |
| 0.040157868 | Proliferation/Metastasis |

|             |                          |
|-------------|--------------------------|
| 5.27E-05    | Proliferation/Metastasis |
| 0.983661329 | TME                      |
| 1.50E-09    | Metabolism               |
| 7.07E-06    | Metabolism               |
| 6.63E-09    | Proliferation/Metastasis |
| 0.000316525 | Proliferation/Metastasis |
| 0.646876077 | TME                      |
| 0.160270604 | TME                      |
| 0.971372331 | TME                      |
| 0.100701641 | TME                      |
| 0.006010787 | Proliferation/Metastasis |
| 0.426834985 | TME                      |
| 0.009764826 | TME                      |
| 3.64E-18    | Metabolism               |
| 0.054116503 | TME                      |
| 0.665150425 | TME                      |
| 0.819326004 | TME                      |
| 0.015821445 | TME                      |
| 0.211166772 | Metabolism               |
| 0.100081157 | Metabolism               |
| 8.93E-05    | Metabolism               |
| 0.112826949 | TME                      |
| 0.088788427 | Metabolism               |
| 0.058893069 | TME                      |
| 0.0455118   | TME                      |
| 0.869474175 | TME                      |
| 0.527981099 | TME                      |
| 0.033841476 | TME                      |
| 0.001839938 | Metabolism               |
| 2.69E-06    | Proliferation/Metastasis |
| 0.003034152 | Metabolism               |
| 3.32E-05    | Proliferation/Metastasis |
| 4.21E-05    | Metabolism               |
| 5.35E-06    | Metabolism               |
| 1.83E-07    | Metabolism               |
| 0.033633972 | Metabolism               |
| 0.030127105 | Metabolism               |
| 0.056603286 | Metabolism               |
| 0.031013438 | Metabolism               |
| 0.540304188 | Metabolism               |
| 0.000215343 | Metabolism               |
| 0.886785085 | Metabolism               |
| 0.00155766  | Metabolism               |



|             |                          |
|-------------|--------------------------|
| 4.22E-13    | Metabolism               |
| 0.426411425 | Metabolism               |
| 0.280395117 | Metabolism               |
| 0.386260513 | TME                      |
| 0.33727361  | Proliferation/Metastasis |
| 7.32E-11    | Metabolism               |
| 8.03E-07    | Proliferation/Metastasis |
| 0.426157109 | TME                      |
| 0.000297783 | Proliferation/Metastasis |
| 0.011498528 | Proliferation/Metastasis |
| 0.31121626  | TME                      |
| 8.71E-06    | TME                      |
| 0.041922452 | Metabolism               |
| 0.042029571 | Metabolism               |
| 5.10E-05    | Proliferation/Metastasis |
| 0.001903639 | Proliferation/Metastasis |
| 8.78E-05    | Proliferation/Metastasis |
| 3.51E-25    | Metabolism               |
| 0.021934039 | Metabolism               |
| 0.083196802 | Metabolism               |
| 0.252592627 | Proliferation/Metastasis |
| 0.671240524 | TME                      |
| 0.001924258 | TME                      |
| 0.258488857 | Metabolism               |
| 0.008081645 | Proliferation/Metastasis |
| 0.020134209 | Metabolism               |
| 0.12227517  | TME                      |
| 0.136084556 | TME                      |
| 0.030358345 | TME                      |
| 0.029364143 | TME                      |
| 4.32E-08    | Metabolism               |
| 3.43E-07    | TME                      |
| 0.000423953 | Proliferation/Metastasis |
| 0.000349261 | TME                      |
| 0.808720807 | Proliferation/Metastasis |
| 0.281274585 | Proliferation/Metastasis |
| 0.770738722 | Metabolism               |
| 0.003461027 | Proliferation/Metastasis |
| 0.357888043 | TME                      |
| 0.123877413 | Metabolism               |
| 2.44E-11    | TME                      |
| 0.021643952 | TME                      |
| 0.051833471 | TME                      |

|             |                          |
|-------------|--------------------------|
| 0.685433975 | TME                      |
| 3.96E-08    | TME                      |
| 0.772198516 | TME                      |
| 0.084345023 | Metabolism               |
| 3.27E-15    | TME                      |
| 0.035613355 | Metabolism               |
| 4.18E-05    | Metabolism               |
| 0.006790444 | Proliferation/Metastasis |
| 9.82E-07    | Proliferation/Metastasis |
| 8.98E-06    | Metabolism               |
| 0.569498932 | Metabolism               |
| 0.080751556 | Metabolism               |
| 0.321158014 | Metabolism               |
| 4.90E-18    | Proliferation/Metastasis |
| 0.062599224 | Proliferation/Metastasis |
| 0.835464631 | Metabolism               |
| 0.025852994 | Metabolism               |
| 0.048212055 | Metabolism               |
| 0.105775355 | TME                      |
| 6.12E-06    | Metabolism               |
| 0.719069737 | Metabolism               |
| 0.693705911 | Metabolism               |
| 0.803938814 | Metabolism               |
| 0.571426709 | Proliferation/Metastasis |
| 0.084080213 | Metabolism               |
| 0.000456146 | Metabolism               |
| 0.017238106 | Metabolism               |
| 0.341606294 | Metabolism               |
| 0.04255018  | Metabolism               |
| 0.817540543 | Metabolism               |
| 0.00419841  | Proliferation/Metastasis |
| 1.45E-14    | Metabolism               |
| 0.757655945 | Metabolism               |
| 0.59980493  | Proliferation/Metastasis |
| 0.000103018 | Metabolism               |
| 0.011742733 | Metabolism               |
| 2.43E-08    | Metabolism               |
| 0.910006462 | Metabolism               |
| 1.36E-06    | Metabolism               |
| 2.99E-09    | Metabolism               |
| 0.479886604 | Metabolism               |
| 0.916249033 | Metabolism               |
| 0.172550678 | TME                      |

|             |                          |
|-------------|--------------------------|
| 0.342951769 | TME                      |
| 0.018551432 | TME                      |
| 0.022047333 | TME                      |
| 0.020559841 | TME                      |
| 0.220616323 | Metabolism               |
| 0.8200502   | Metabolism               |
| 0.312713198 | Proliferation/Metastasis |
| 0.866567458 | Metabolism               |
| 0.000125416 | Proliferation/Metastasis |
| 0.029874556 | Metabolism               |
| 3.81E-30    | TME                      |
| 3.43E-06    | Metabolism               |
| 0.363909076 | Metabolism               |
| 0.101078564 | Metabolism               |
| 0.606824684 | Metabolism               |
| 0.000239878 | TME                      |
| 0.003582953 | TME                      |
| 6.61E-07    | Proliferation/Metastasis |
| 0.060731883 | Metabolism               |
| 0.053571927 | Proliferation/Metastasis |
| 0.007909647 | Proliferation/Metastasis |
| 0.002612638 | TME                      |
| 0.57280907  | TME                      |
| 0.001519716 | TME                      |
| 0.417313052 | TME                      |
| 0.244750679 | Metabolism               |
| 0.107911614 | Proliferation/Metastasis |
| 0.746442671 | Metabolism               |
| 0.45934717  | Metabolism               |
| 0.210732326 | Proliferation/Metastasis |
| 0.034777947 | Proliferation/Metastasis |
| 0.265894973 | Metabolism               |
| 0.004043417 | Metabolism               |
| 0.020167488 | Metabolism               |
| 0.007828608 | Metabolism               |
| 0.49310093  | TME                      |
| 0.968279288 | TME                      |
| 0.006083943 | TME                      |
| 0.833178453 | TME                      |
| 0.837797929 | TME                      |
| 0.453860881 | Metabolism               |
| 0.406533246 | Metabolism               |
| 0.645275784 | Metabolism               |

|             |                          |
|-------------|--------------------------|
| 0.065721449 | Metabolism               |
| 0.014810279 | Metabolism               |
| 3.33E-05    | TME                      |
| 0.053345096 | TME                      |
| 0.332199415 | TME                      |
| 0.758969302 | TME                      |
| 0.358826874 | TME                      |
| 0.302073856 | TME                      |
| 0.212478715 | TME                      |
| 0.587816212 | TME                      |
| 0.235442678 | TME                      |
| 0.028039047 | Proliferation/Metastasis |
| 0.127470772 | Proliferation/Metastasis |
| 0.048436443 | Metabolism               |
| 0.033537373 | Metabolism               |
| 0.128686191 | TME                      |
| 0.855771612 | Metabolism               |
| 0.006230326 | Metabolism               |
| 0.202644834 | TME                      |
| 9.51E-05    | Proliferation/Metastasis |
| 0.105491075 | Proliferation/Metastasis |
| 0.679326495 | TME                      |
| 1.93E-05    | Metabolism               |
| 1.31E-06    | Metabolism               |
| 0.166746938 | Proliferation/Metastasis |
| 0.004212977 | Proliferation/Metastasis |
| 0.031701529 | TME                      |
| 0.050412469 | TME                      |
| 0.157876127 | TME                      |
| 8.58E-05    | TME                      |
| 0.117309242 | Proliferation/Metastasis |
| 1.38E-05    | TME                      |
| 0.056752941 | TME                      |
| 0.297976961 | Metabolism               |
| 0.000273988 | TME                      |
| 0.010432747 | TME                      |
| 0.780117095 | TME                      |
| 0.000516209 | TME                      |
| 0.205392848 | Metabolism               |
| 0.141184652 | Metabolism               |
| 0.025657439 | Metabolism               |
| 0.00110651  | TME                      |
| 0.018824066 | Metabolism               |

|             |                          |
|-------------|--------------------------|
| 0.081903295 | TME                      |
| 0.251399801 | TME                      |
| 0.661313516 | TME                      |
| 0.354449803 | TME                      |
| 0.074280009 | TME                      |
| 0.000660746 | Metabolism               |
| 0.037343904 | Proliferation/Metastasis |
| 0.084451993 | Metabolism               |
| 0.221611113 | Proliferation/Metastasis |
| 0.000289494 | Metabolism               |
| 0.001070979 | Metabolism               |
| 0.087152053 | Metabolism               |
| 8.97E-05    | Metabolism               |
| 0.001084729 | Metabolism               |
| 0.536931365 | Metabolism               |
| 0.253969045 | Metabolism               |
| 0.81773847  | Metabolism               |
| 0.578653509 | Metabolism               |
| 0.158002523 | Metabolism               |
| 0.005187315 | Metabolism               |
| 0.329524168 | Metabolism               |
| 0.769864237 | Metabolism               |
| 0.017187896 | Metabolism               |
| 0.004465785 | TME                      |
| 0.305917723 | Proliferation/Metastasis |
| 0.425523583 | Metabolism               |
| 0.465483258 | Proliferation/Metastasis |
| 0.805041887 | TME                      |
| 0.173813229 | Proliferation/Metastasis |
| 0.056296225 | Proliferation/Metastasis |
| 0.211798468 | TME                      |
| 0.474674185 | TME                      |
| 0.000214338 | Metabolism               |
| 5.10E-06    | Metabolism               |
| 0.141692124 | Proliferation/Metastasis |
| 0.118323825 | Proliferation/Metastasis |
| 0.00025268  | Proliferation/Metastasis |
| 0.31113639  | Metabolism               |
| 0.400360249 | Metabolism               |
| 0.15941812  | Metabolism               |
| 0.488390459 | Proliferation/Metastasis |
| 0.010228485 | TME                      |
| 0.008189315 | TME                      |

|             |                          |
|-------------|--------------------------|
| 0.008618481 | Metabolism               |
| 0.153022428 | Proliferation/Metastasis |
| 0.000126046 | Metabolism               |
| 0.001384843 | TME                      |
| 0.018211905 | TME                      |
| 0.461356403 | TME                      |
| 1.81E-06    | TME                      |
| 5.19E-07    | Metabolism               |
| 0.056215709 | TME                      |
| 0.011533296 | Proliferation/Metastasis |
| 0.069384978 | TME                      |
| 0.33652021  | Proliferation/Metastasis |
| 0.093090641 | Proliferation/Metastasis |
| 0.030214846 | Metabolism               |
| 0.75258463  | Proliferation/Metastasis |
| 0.010869268 | TME                      |
| 0.40104386  | Metabolism               |
| 0.149609218 | TME                      |
| 0.018010916 | TME                      |
| 0.000156049 | TME                      |
| 0.315006237 | TME                      |
| 0.000495476 | TME                      |
| 0.083741064 | TME                      |
| 0.515390328 | Metabolism               |
| 0.110295379 | TME                      |
| 0.425899474 | Metabolism               |
| 0.168028831 | Metabolism               |
| 0.000178273 | Proliferation/Metastasis |
| 0.494928258 | Proliferation/Metastasis |
| 0.542844381 | Metabolism               |
| 0.366479807 | Metabolism               |
| 0.051027766 | Metabolism               |
| 4.66E-07    | Metabolism               |
| 0.830784087 | Proliferation/Metastasis |
| 4.72E-06    | Proliferation/Metastasis |
| 0.880683407 | Metabolism               |
| 0.061890848 | Metabolism               |
| 3.26E-06    | Metabolism               |
| 0.004822258 | TME                      |
| 5.90E-05    | Metabolism               |
| 9.84E-05    | Metabolism               |
| 0.62918124  | Metabolism               |
| 0.148771153 | Metabolism               |

|             |                          |
|-------------|--------------------------|
| 0.850197089 | Proliferation/Metastasis |
| 1.26E-07    | Metabolism               |
| 0.27205203  | Metabolism               |
| 0.069846345 | Metabolism               |
| 0.001536962 | Metabolism               |
| 0.094051408 | Metabolism               |
| 0.073615114 | Metabolism               |
| 0.005900135 | Proliferation/Metastasis |
| 0.004561775 | Metabolism               |
| 1.13E-05    | Metabolism               |
| 0.713467287 | Proliferation/Metastasis |
| 0.618758362 | Metabolism               |
| 0.003935871 | Metabolism               |
| 0.390957071 | Metabolism               |
| 0.400662017 | Metabolism               |
| 0.206744485 | Metabolism               |
| 0.001441986 | Metabolism               |
| 0.64477709  | Metabolism               |
| 0.620897131 | Metabolism               |
| 0.352095702 | TME                      |
| 0.221557473 | TME                      |
| 0.095912943 | TME                      |
| 0.453671385 | TME                      |
| 0.872594109 | TME                      |
| 0.112382064 | Metabolism               |
| 0.703803144 | Metabolism               |
| 0.005760376 | Proliferation/Metastasis |
| 4.11E-08    | Metabolism               |
| 0.029114915 | Proliferation/Metastasis |
| 0.005482683 | Metabolism               |
| 0.93468913  | TME                      |
| 1.12E-07    | Metabolism               |
| 0.008920371 | Metabolism               |
| 0.000664418 | Metabolism               |
| 0.292506477 | Metabolism               |
| 0.063659868 | TME                      |
| 0.047483969 | TME                      |
| 0.695601888 | Proliferation/Metastasis |
| 0.001061096 | Metabolism               |
| 0.057673139 | Proliferation/Metastasis |
| 0.013598739 | Proliferation/Metastasis |
| 0.384243829 | TME                      |
| 0.242671691 | TME                      |

|             |                          |
|-------------|--------------------------|
| 0.103576756 | TME                      |
| 0.110105898 | TME                      |
| 0.666898338 | Metabolism               |
| 0.211782401 | Proliferation/Metastasis |
| 0.015706933 | Metabolism               |
| 0.326534909 | Metabolism               |
| 0.383200877 | Proliferation/Metastasis |
| 0.642970596 | Proliferation/Metastasis |
| 0.06192539  | Metabolism               |
| 0.634638727 | Metabolism               |
| 0.253359254 | Metabolism               |
| 0.667165228 | Metabolism               |
| 0.711266149 | TME                      |
| 0.01497105  | TME                      |
| 0.10976862  | TME                      |
| 0.042554841 | TME                      |
| 0.132753554 | TME                      |
| 0.428210585 | Metabolism               |
| 0.536055346 | Metabolism               |
| 0.603496139 | Metabolism               |
| 0.494842023 | Metabolism               |
| 0.586117673 | Metabolism               |
| 0.072634654 | TME                      |
| 0.997917577 | TME                      |
| 0.045511247 | TME                      |
| 0.136381412 | TME                      |
| 0.188881365 | TME                      |
| 0.037476507 | TME                      |
| 0.036168859 | TME                      |
| 0.018875599 | TME                      |
| 0.083634115 | TME                      |
| 0.104774669 | Proliferation/Metastasis |
| 0.017229066 | Proliferation/Metastasis |
| 0.044772167 | Metabolism               |
| 0.001890287 | Metabolism               |
| 0.020573856 | TME                      |
| 0.867018069 | Metabolism               |
| 0.957729552 | Metabolism               |
| 0.211696767 | TME                      |
| 0.832328245 | Proliferation/Metastasis |
| 0.037263107 | Proliferation/Metastasis |
| 0.152346012 | TME                      |
| 0.83933483  | Metabolism               |



|             |                          |
|-------------|--------------------------|
| 0.076199464 | Metabolism               |
| 0.011688759 | Proliferation/Metastasis |
| 0.301980912 | Proliferation/Metastasis |
| 0.036996076 | TME                      |
| 0.075904263 | TME                      |
| 0.104146255 | TME                      |
| 0.665140308 | TME                      |
| 0.434991186 | Proliferation/Metastasis |
| 0.927383646 | TME                      |
| 0.124778444 | TME                      |
| 0.039222276 | Metabolism               |
| 0.00933329  | TME                      |
| 0.002355153 | TME                      |
| 0.051981724 | TME                      |
| 0.159174437 | TME                      |
| 0.352827423 | Metabolism               |
| 0.559187223 | Metabolism               |
| 0.680256358 | Metabolism               |
| 0.621974898 | TME                      |
| 0.918071444 | Metabolism               |
| 0.034298531 | TME                      |
| 0.498828153 | TME                      |
| 0.050454581 | TME                      |
| 0.016157278 | TME                      |
| 0.116610947 | TME                      |
| 0.375163771 | Metabolism               |
| 0.017544332 | Proliferation/Metastasis |
| 0.493122414 | Metabolism               |
| 0.007523238 | Proliferation/Metastasis |
| 0.329012282 | Metabolism               |
| 0.358198545 | Metabolism               |
| 0.457831557 | Metabolism               |
| 0.442473271 | Metabolism               |
| 0.219750432 | Metabolism               |
| 0.682005619 | Metabolism               |
| 0.438505992 | Metabolism               |
| 0.470453618 | Metabolism               |
| 0.938035741 | Metabolism               |
| 0.536023071 | Metabolism               |
| 0.190019808 | Metabolism               |
| 0.666209069 | Metabolism               |
| 0.643362254 | Metabolism               |
| 0.380832411 | Metabolism               |

|             |                          |
|-------------|--------------------------|
| 0.247355295 | TME                      |
| 0.271919318 | Proliferation/Metastasis |
| 0.12794747  | Metabolism               |
| 0.870110409 | Proliferation/Metastasis |
| 0.034162236 | TME                      |
| 0.087376992 | Proliferation/Metastasis |
| 0.030124488 | Proliferation/Metastasis |
| 0.000632294 | TME                      |
| 0.017739047 | TME                      |
| 0.640421961 | Metabolism               |
| 0.602234739 | Metabolism               |
| 0.003023269 | Proliferation/Metastasis |
| 0.021837212 | Proliferation/Metastasis |
| 0.048312486 | Proliferation/Metastasis |
| 0.095047457 | Metabolism               |
| 0.713448634 | Metabolism               |
| 0.175849981 | Metabolism               |
| 0.356216167 | Proliferation/Metastasis |
| 0.135326074 | TME                      |
| 0.296532473 | TME                      |
| 0.308387761 | Metabolism               |
| 0.271459942 | Proliferation/Metastasis |
| 0.762379367 | Metabolism               |
| 0.06322338  | TME                      |
| 0.241003342 | TME                      |
| 0.181747408 | TME                      |
| 0.046964934 | TME                      |
| 0.631672472 | Metabolism               |
| 0.091478149 | TME                      |
| 0.454020902 | Proliferation/Metastasis |
| 0.024903962 | TME                      |
| 0.198291281 | Proliferation/Metastasis |
| 0.125769642 | Proliferation/Metastasis |
| 0.453227742 | Metabolism               |
| 0.005885191 | Proliferation/Metastasis |
| 0.057889088 | TME                      |
| 0.03280994  | Metabolism               |
| 0.023185463 | TME                      |
| 0.140761394 | TME                      |
| 0.03273915  | TME                      |
| 0.04410575  | TME                      |
| 0.186971214 | TME                      |
| 0.073690633 | TME                      |

|             |                          |
|-------------|--------------------------|
| 0.522795484 | Metabolism               |
| 0.079451896 | TME                      |
| 0.404672711 | Metabolism               |
| 0.709868635 | Metabolism               |
| 0.002435373 | Proliferation/Metastasis |
| 0.75833018  | Proliferation/Metastasis |
| 0.027882334 | Metabolism               |
| 0.684988259 | Metabolism               |
| 0.135555088 | Metabolism               |
| 0.436465232 | Metabolism               |
| 0.098462302 | Proliferation/Metastasis |
| 0.673288192 | Proliferation/Metastasis |
| 0.607099761 | Metabolism               |
| 0.391999554 | Metabolism               |
| 0.256591333 | Metabolism               |
| 0.139466255 | TME                      |
| 0.963328659 | Metabolism               |
| 0.969891473 | Metabolism               |
| 0.601140708 | Metabolism               |
| 0.140920565 | Metabolism               |
| 0.564454948 | Proliferation/Metastasis |
| 0.249227098 | Metabolism               |
| 0.540703511 | Metabolism               |
| 0.874357121 | Metabolism               |
| 6.28E-06    | Metabolism               |
| 0.001381465 | Metabolism               |
| 0.217601482 | Metabolism               |
| 0.009747408 | Proliferation/Metastasis |
| 0.862350987 | Metabolism               |
| 0.555010831 | Metabolism               |
| 0.130549821 | Proliferation/Metastasis |
| 0.046599944 | Metabolism               |
| 0.939227309 | Metabolism               |
| 0.996768922 | Metabolism               |
| 0.812994747 | Metabolism               |
| 0.458984642 | Metabolism               |
| 0.877101675 | Metabolism               |
| 0.291661094 | Metabolism               |
| 0.271540182 | Metabolism               |
| 0.044853885 | TME                      |
| 0.026214402 | TME                      |
| 0.02805874  | TME                      |
| 0.026337786 | TME                      |

|             |                          |
|-------------|--------------------------|
| 0.016387279 | TME                      |
| 0.999776537 | Metabolism               |
| 0.518212273 | Metabolism               |
| 0.807003272 | Proliferation/Metastasis |
| 0.53508349  | Metabolism               |
| 0.015106409 | Proliferation/Metastasis |
| 0.452204668 | Metabolism               |
| 0.18240663  | TME                      |
| 0.702102351 | Metabolism               |
| 0.251414433 | Metabolism               |
| 0.330628256 | Metabolism               |
| 0.737601825 | Metabolism               |
| 0.423595982 | TME                      |
| 0.112098954 | TME                      |
| 0.185387768 | Proliferation/Metastasis |
| 0.707732921 | Metabolism               |
| 0.06873154  | Proliferation/Metastasis |
| 0.746340549 | Proliferation/Metastasis |
| 0.77336996  | TME                      |
| 0.260886854 | TME                      |
| 0.391809327 | TME                      |
| 0.532819861 | TME                      |
| 0.673926717 | Metabolism               |
| 0.114248901 | Proliferation/Metastasis |
| 0.459184654 | Metabolism               |
| 0.10105344  | Metabolism               |
| 0.010375902 | Proliferation/Metastasis |
| 0.004130906 | Proliferation/Metastasis |
| 0.445616106 | Metabolism               |
| 0.048808355 | Metabolism               |
| 0.302563666 | Metabolism               |
| 0.05456156  | Metabolism               |
| 0.341197883 | TME                      |
| 0.20161893  | TME                      |
| 0.090958403 | TME                      |
| 0.329480343 | TME                      |
| 0.356583166 | TME                      |
| 0.060667409 | Metabolism               |
| 0.00806079  | Metabolism               |
| 0.765450863 | Metabolism               |
| 0.038873278 | Metabolism               |
| 0.165584329 | Metabolism               |
| 0.029803429 | TME                      |

|             |                          |
|-------------|--------------------------|
| 0.032888881 | TME                      |
| 0.568377878 | TME                      |
| 0.698642716 | TME                      |
| 0.291490659 | TME                      |
| 0.387736505 | TME                      |
| 0.372283486 | TME                      |
| 0.499166481 | TME                      |
| 0.747172608 | TME                      |
| 0.587474039 | Proliferation/Metastasis |
| 0.975792714 | Proliferation/Metastasis |
| 0.704804632 | Metabolism               |
| 0.506302791 | Metabolism               |
| 0.766928259 | TME                      |
| 0.368361164 | Metabolism               |
| 0.686671059 | Metabolism               |
| 0.067946167 | TME                      |
| 0.453283238 | Proliferation/Metastasis |
| 0.445162537 | Proliferation/Metastasis |
| 0.914698129 | TME                      |
| 0.353496512 | Metabolism               |
| 0.79529549  | Metabolism               |
| 0.46696964  | Proliferation/Metastasis |
| 0.068169742 | Proliferation/Metastasis |
| 0.532328918 | TME                      |
| 0.275493117 | TME                      |
| 0.390460772 | TME                      |
| 0.801211944 | TME                      |
| 0.320372926 | Proliferation/Metastasis |
| 0.057758989 | TME                      |
| 0.146202565 | TME                      |
| 0.353523253 | Metabolism               |
| 0.25805958  | TME                      |
| 0.259954966 | TME                      |
| 0.591344294 | TME                      |
| 0.58920461  | TME                      |
| 0.425923777 | Metabolism               |
| 0.054101855 | Metabolism               |
| 0.057862484 | Metabolism               |
| 0.002243413 | TME                      |
| 0.100343552 | Metabolism               |
| 0.235345108 | TME                      |
| 0.502934691 | TME                      |
| 0.151442195 | TME                      |

|             |                          |
|-------------|--------------------------|
| 0.865810896 | TME                      |
| 0.156219494 | TME                      |
| 0.869710395 | Metabolism               |
| 0.745028051 | Proliferation/Metastasis |
| 0.265889063 | Metabolism               |
| 0.004470927 | Proliferation/Metastasis |
| 0.181399089 | Metabolism               |
| 0.561140022 | Metabolism               |
| 0.755066759 | Metabolism               |
| 0.98369505  | Metabolism               |
| 0.563045851 | Metabolism               |
| 0.879088735 | Metabolism               |
| 0.045752484 | Metabolism               |
| 0.353323095 | Metabolism               |
| 0.038703071 | Metabolism               |
| 0.333970942 | Metabolism               |
| 0.102198658 | Metabolism               |
| 0.212405491 | Metabolism               |
| 0.134215935 | Metabolism               |
| 0.34148687  | Metabolism               |
| 0.122810181 | TME                      |
| 0.026907284 | Proliferation/Metastasis |
| 0.14182372  | Metabolism               |
| 0.077524969 | Proliferation/Metastasis |
| 0.351607585 | TME                      |
| 0.053599951 | Proliferation/Metastasis |
| 0.038462883 | Proliferation/Metastasis |
| 0.010900809 | TME                      |
| 0.02271195  | TME                      |
| 0.183253184 | Metabolism               |
| 0.038928858 | Metabolism               |
| 0.305224573 | Proliferation/Metastasis |
| 0.039692623 | Proliferation/Metastasis |
| 0.004544958 | Proliferation/Metastasis |
| 0.904408498 | Metabolism               |
| 0.361810785 | Metabolism               |
| 0.699848793 | Metabolism               |
| 0.001333766 | Proliferation/Metastasis |
| 0.023056545 | TME                      |
| 0.048409678 | TME                      |
| 0.030320269 | Metabolism               |
| 0.382835079 | Proliferation/Metastasis |
| 0.184723005 | Metabolism               |

|             |                          |
|-------------|--------------------------|
| 0.159896844 | TME                      |
| 0.208911532 | TME                      |
| 0.389894324 | TME                      |
| 0.011975252 | TME                      |
| 0.459374158 | Metabolism               |
| 0.167715571 | TME                      |
| 0.54721733  | Proliferation/Metastasis |
| 0.091284297 | TME                      |
| 0.688455291 | Proliferation/Metastasis |
| 0.088020158 | Proliferation/Metastasis |
| 0.12519672  | Metabolism               |
| 0.295219136 | Proliferation/Metastasis |
| 0.07764102  | TME                      |
| 0.126493462 | Metabolism               |
| 0.379787171 | TME                      |
| 0.062721528 | TME                      |
| 0.255592112 | TME                      |
| 0.216606151 | TME                      |
| 0.775505063 | TME                      |
| 0.219893547 | TME                      |
| 0.72605776  | Metabolism               |
| 0.013103566 | TME                      |
| 0.050157299 | Metabolism               |
| 0.074703154 | Metabolism               |
| 0.019605252 | Proliferation/Metastasis |
| 0.666378985 | Proliferation/Metastasis |
| 0.832174777 | Metabolism               |
| 0.244561666 | Metabolism               |
| 0.107358306 | Metabolism               |
| 0.679796181 | Metabolism               |
| 0.119186609 | Proliferation/Metastasis |
| 0.526771836 | Proliferation/Metastasis |
| 0.126872173 | Metabolism               |
| 0.002696829 | Metabolism               |
| 0.713266283 | Metabolism               |
| 0.01299034  | TME                      |
| 0.919774755 | Metabolism               |
| 0.857136454 | Metabolism               |
| 0.106780058 | Metabolism               |
| 0.744225182 | Metabolism               |
| 0.07552347  | Proliferation/Metastasis |
| 0.147809485 | Metabolism               |
| 0.487949639 | Metabolism               |

|             |                          |
|-------------|--------------------------|
| 0.087682659 | Metabolism               |
| 0.479429718 | Metabolism               |
| 0.148635474 | Metabolism               |
| 0.146450425 | Metabolism               |
| 0.747354093 | Proliferation/Metastasis |
| 0.224546647 | Metabolism               |
| 0.21815779  | Metabolism               |
| 0.016844737 | Proliferation/Metastasis |
| 0.776511162 | Metabolism               |
| 0.069511749 | Metabolism               |
| 0.114790373 | Metabolism               |
| 0.036151989 | Metabolism               |
| 0.388730182 | Metabolism               |
| 0.111876373 | Metabolism               |
| 0.104277233 | Metabolism               |
| 0.220324719 | Metabolism               |
| 0.067376337 | TME                      |
| 0.254951541 | TME                      |
| 0.120758766 | TME                      |
| 0.118673323 | TME                      |
| 0.388200765 | TME                      |
| 0.472797359 | Metabolism               |
| 0.279596584 | Metabolism               |
| 0.16561679  | Proliferation/Metastasis |
| 0.17510811  | Metabolism               |
| 0.020129104 | Proliferation/Metastasis |
| 0.147552851 | Metabolism               |
| 0.42164912  | TME                      |
| 0.991438165 | Metabolism               |
| 0.185131055 | Metabolism               |
| 0.547729339 | Metabolism               |
| 0.108447547 | Metabolism               |
| 0.150341708 | TME                      |
| 0.108659936 | TME                      |
| 0.08257912  | Proliferation/Metastasis |
| 0.051101561 | Metabolism               |
| 0.140502858 | Proliferation/Metastasis |
| 0.696970645 | Proliferation/Metastasis |
| 0.035817584 | TME                      |
| 0.452126402 | TME                      |
| 0.675413576 | TME                      |
| 0.55904522  | TME                      |
| 0.085085964 | Metabolism               |



|             |                          |
|-------------|--------------------------|
| 0.000112575 | Proliferation/Metastasis |
| 0.681192158 | Metabolism               |
| 1.23E-08    | Metabolism               |
| 0.091912283 | Proliferation/Metastasis |
| 0.924570369 | Proliferation/Metastasis |
| 0.772249329 | Metabolism               |
| 8.99E-05    | Metabolism               |
| 0.002499208 | Metabolism               |
| 0.223415957 | Metabolism               |
| 0.704226412 | TME                      |
| 0.483110668 | TME                      |
| 0.552577736 | TME                      |
| 0.530716471 | TME                      |
| 0.900374331 | TME                      |
| 0.083166896 | Metabolism               |
| 0.000487382 | Metabolism               |
| 0.000927458 | Metabolism               |
| 0.001993539 | Metabolism               |
| 0.859585409 | Metabolism               |
| 0.219693157 | TME                      |
| 0.215493942 | TME                      |
| 0.110445086 | TME                      |
| 0.499807014 | TME                      |
| 0.488783135 | TME                      |
| 0.934194303 | TME                      |
| 0.946247242 | TME                      |
| 0.514180906 | TME                      |
| 0.717644534 | TME                      |
| 0.92173624  | Proliferation/Metastasis |
| 0.31700285  | Proliferation/Metastasis |
| 1.38E-06    | Metabolism               |
| 0.013176999 | Metabolism               |
| 0.497333424 | TME                      |
| 0.44352848  | Metabolism               |
| 0.141662745 | Metabolism               |
| 0.386590968 | TME                      |
| 1.26E-05    | Proliferation/Metastasis |
| 0.006626375 | Proliferation/Metastasis |
| 0.705394555 | TME                      |
| 0.173547328 | Metabolism               |
| 1.77E-06    | Metabolism               |
| 0.653274922 | Proliferation/Metastasis |
| 0.69921931  | Proliferation/Metastasis |

|             |                          |
|-------------|--------------------------|
| 0.442062858 | TME                      |
| 0.203090683 | TME                      |
| 0.968001564 | TME                      |
| 0.388286899 | TME                      |
| 0.007545359 | Proliferation/Metastasis |
| 0.039304231 | TME                      |
| 0.175894458 | TME                      |
| 0.841661994 | Metabolism               |
| 0.699526736 | TME                      |
| 0.625167376 | TME                      |
| 0.370470442 | TME                      |
| 0.110754516 | TME                      |
| 0.001522277 | Metabolism               |
| 0.002046708 | Metabolism               |
| 1.55E-05    | Metabolism               |
| 0.510273391 | TME                      |
| 3.54E-11    | Metabolism               |
| 0.615153594 | TME                      |
| 0.423476652 | TME                      |
| 0.087614864 | TME                      |
| 0.402561991 | TME                      |
| 0.06724381  | TME                      |
| 3.42E-12    | Metabolism               |
| 0.844971861 | Proliferation/Metastasis |
| 6.08E-08    | Metabolism               |
| 0.160704773 | Proliferation/Metastasis |
| 2.26E-08    | Metabolism               |
| 0.000379232 | Metabolism               |
| 0.027509357 | Metabolism               |
| 0.000109859 | Metabolism               |
| 1.37E-08    | Metabolism               |
| 0.364723995 | Metabolism               |
| 0.122732905 | Metabolism               |
| 0.012005452 | Metabolism               |
| 0.002553121 | Metabolism               |
| 0.003088114 | Metabolism               |
| 7.32E-06    | Metabolism               |
| 0.028127722 | Metabolism               |
| 0.830377084 | Metabolism               |
| 9.53E-05    | Metabolism               |
| 0.692623721 | TME                      |
| 0.846534543 | Proliferation/Metastasis |
| 0.685615407 | Metabolism               |

|             |                          |
|-------------|--------------------------|
| 2.90E-05    | Proliferation/Metastasis |
| 0.58720448  | TME                      |
| 0.001207394 | Proliferation/Metastasis |
| 0.051113943 | Proliferation/Metastasis |
| 0.061577124 | TME                      |
| 0.027703804 | TME                      |
| 0.060316697 | Metabolism               |
| 0.601549788 | Metabolism               |
| 0.022605877 | Proliferation/Metastasis |
| 0.425763746 | Proliferation/Metastasis |
| 0.800266646 | Proliferation/Metastasis |
| 0.444538832 | Metabolism               |
| 0.015994036 | Metabolism               |
| 0.628394077 | Metabolism               |
| 5.62E-09    | Proliferation/Metastasis |
| 0.29050368  | TME                      |
| 0.426744254 | TME                      |
| 0.000842467 | Metabolism               |
| 0.191999631 | Proliferation/Metastasis |
| 0.762802226 | Metabolism               |
| 0.403369074 | TME                      |
| 0.351693794 | TME                      |
| 0.320401488 | TME                      |
| 0.477474701 | TME                      |
| 0.007412708 | Metabolism               |
| 0.969054012 | TME                      |
| 0.291544885 | Proliferation/Metastasis |
| 0.045398592 | TME                      |
| 0.29323586  | Proliferation/Metastasis |
| 3.30E-07    | Proliferation/Metastasis |
| 0.074607632 | Metabolism               |
| 0.033182674 | Proliferation/Metastasis |
| 0.950913968 | TME                      |
| 0.000847721 | Metabolism               |
| 0.377146988 | TME                      |
| 0.006954759 | TME                      |
| 9.33E-06    | TME                      |
| 0.453778997 | TME                      |
| 0.144490578 | TME                      |
| 0.92083285  | TME                      |
| 0.029730765 | Metabolism               |
| 0.016728189 | TME                      |
| 0.004237668 | Metabolism               |

|             |                          |
|-------------|--------------------------|
| 0.525166762 | Metabolism               |
| 0.426939818 | Proliferation/Metastasis |
| 0.135214186 | Proliferation/Metastasis |
| 0.859282869 | Metabolism               |
| 0.001030197 | Metabolism               |
| 0.351137503 | Metabolism               |
| 1.05E-08    | Metabolism               |
| 0.046456231 | Proliferation/Metastasis |
| 0.466323387 | Proliferation/Metastasis |
| 0.013474261 | Metabolism               |
| 7.26E-05    | Metabolism               |
| 2.27E-14    | Metabolism               |
| 0.367750616 | TME                      |
| 0.002253164 | Metabolism               |
| 2.58E-05    | Metabolism               |
| 0.007692004 | Metabolism               |
| 0.540876467 | Metabolism               |
| 1.72E-05    | Proliferation/Metastasis |
| 6.75E-09    | Metabolism               |
| 0.630539792 | Metabolism               |
| 0.400932733 | Metabolism               |
| 9.06E-08    | Metabolism               |
| 6.26E-06    | Metabolism               |
| 3.95E-05    | Metabolism               |
| 0.505769891 | Proliferation/Metastasis |
| 0.205633512 | Metabolism               |
| 2.92E-07    | Metabolism               |
| 0.800437375 | Proliferation/Metastasis |
| 0.710566021 | Metabolism               |
| 0.057204094 | Metabolism               |
| 0.000467294 | Metabolism               |
| 0.004776586 | Metabolism               |
| 3.99E-06    | Metabolism               |
| 0.331806203 | Metabolism               |
| 0.744857895 | Metabolism               |
| 0.001628611 | Metabolism               |
| 0.217493891 | TME                      |
| 0.35693477  | TME                      |
| 0.147129974 | TME                      |
| 0.404707133 | TME                      |
| 0.605800409 | TME                      |
| 0.70905879  | Metabolism               |
| 0.001878283 | Metabolism               |

|             |                          |
|-------------|--------------------------|
| 6.78E-05    | Proliferation/Metastasis |
| 3.47E-08    | Metabolism               |
| 0.000606162 | Proliferation/Metastasis |
| 0.000362877 | Metabolism               |
| 0.708821512 | TME                      |
| 0.004502276 | Metabolism               |
| 3.01E-08    | Metabolism               |
| 7.48E-09    | Metabolism               |
| 0.002820188 | Metabolism               |
| 0.03439707  | TME                      |
| 0.843151772 | TME                      |
| 0.064038273 | Proliferation/Metastasis |
| 5.12E-06    | Metabolism               |
| 0.281314626 | Proliferation/Metastasis |
| 0.946351563 | Proliferation/Metastasis |
| 0.086668151 | TME                      |
| 0.578105874 | TME                      |
| 0.557049689 | TME                      |
| 0.809209231 | TME                      |
| 0.387569709 | Metabolism               |
| 0.045656957 | Proliferation/Metastasis |
| 0.262316495 | Metabolism               |
| 0.012639629 | Metabolism               |
| 0.476036605 | Proliferation/Metastasis |
| 0.640412584 | Proliferation/Metastasis |
| 0.341498406 | Metabolism               |
| 0.011401199 | Metabolism               |
| 0.011043593 | Metabolism               |
| 0.014675238 | Metabolism               |
| 0.990284246 | TME                      |
| 0.97285375  | TME                      |
| 0.317613147 | TME                      |
| 0.747456845 | TME                      |
| 0.207135375 | TME                      |
| 0.450837705 | Metabolism               |
| 0.15320228  | Metabolism               |
| 0.631844637 | Metabolism               |
| 0.019816083 | Metabolism               |
| 0.404162478 | Metabolism               |
| 0.639006693 | TME                      |
| 0.043528191 | TME                      |
| 0.865011743 | TME                      |
| 0.80054182  | TME                      |

|             |                          |
|-------------|--------------------------|
| 0.695494077 | TME                      |
| 0.592391188 | TME                      |
| 0.577296309 | TME                      |
| 0.942592397 | TME                      |
| 0.885861193 | TME                      |
| 0.92397599  | Proliferation/Metastasis |
| 0.640339386 | Proliferation/Metastasis |
| 0.001174032 | Metabolism               |
| 0.12920832  | Metabolism               |
| 0.100080794 | TME                      |
| 0.497867528 | Metabolism               |
| 0.988023851 | Metabolism               |
| 0.72550554  | TME                      |
| 0.12651104  | Proliferation/Metastasis |
| 0.49746799  | Proliferation/Metastasis |
| 0.904082446 | TME                      |
| 0.063488431 | Metabolism               |
| 0.006739864 | Metabolism               |
| 0.606019445 | Proliferation/Metastasis |
| 0.751961921 | Proliferation/Metastasis |
| 0.557012529 | TME                      |
| 0.932055395 | TME                      |
| 0.717395571 | TME                      |
| 0.488866488 | TME                      |
| 0.011209901 | Proliferation/Metastasis |
| 0.114441831 | TME                      |
| 0.838653813 | TME                      |
| 0.250669382 | Metabolism               |
| 0.168566044 | TME                      |
| 0.237599307 | TME                      |
| 0.853975617 | TME                      |
| 0.88672733  | TME                      |
| 0.060649431 | Metabolism               |
| 0.013484497 | Metabolism               |
| 0.040856758 | Metabolism               |
| 0.32304267  | TME                      |
| 0.004205178 | Metabolism               |
| 0.563343058 | TME                      |
| 0.275360976 | TME                      |
| 0.422189649 | TME                      |
| 0.925806851 | TME                      |
| 0.401924447 | TME                      |
| 0.05926305  | Metabolism               |

|             |                          |
|-------------|--------------------------|
| 0.429807178 | Proliferation/Metastasis |
| 0.02748866  | Metabolism               |
| 0.359652701 | Proliferation/Metastasis |
| 0.020938218 | Metabolism               |
| 0.010445883 | Metabolism               |
| 0.217005784 | Metabolism               |
| 0.153342835 | Metabolism               |
| 0.018914127 | Metabolism               |
| 0.547660901 | Metabolism               |
| 0.574466021 | Metabolism               |
| 0.477458225 | Metabolism               |
| 0.252621714 | Metabolism               |
| 0.842835458 | Metabolism               |
| 0.00554923  | Metabolism               |
| 0.029172396 | Metabolism               |
| 0.333630866 | Metabolism               |
| 0.017765528 | Metabolism               |
| 0.39610125  | TME                      |
| 0.845016077 | Proliferation/Metastasis |
| 0.215774965 | Metabolism               |
| 0.302622822 | Proliferation/Metastasis |
| 0.903999943 | TME                      |
| 0.477149756 | Proliferation/Metastasis |
| 0.877921571 | Proliferation/Metastasis |
| 0.907074333 | TME                      |
| 0.863152009 | TME                      |
| 0.862401179 | Metabolism               |
| 0.689347873 | Metabolism               |
| 0.97779869  | Proliferation/Metastasis |
| 0.668594965 | Proliferation/Metastasis |
| 0.558026399 | Proliferation/Metastasis |
| 0.27135888  | Metabolism               |
| 0.143825683 | Metabolism               |
| 0.180249282 | Metabolism               |
| 0.043700132 | Proliferation/Metastasis |
| 0.661923979 | TME                      |
| 0.847155129 | TME                      |
| 0.064742172 | Metabolism               |
| 0.913101769 | Proliferation/Metastasis |
| 0.826356148 | Metabolism               |
| 0.05945721  | TME                      |
| 0.391409906 | TME                      |
| 0.0848238   | TME                      |

|             |                          |
|-------------|--------------------------|
| 0.147871585 | TME                      |
| 0.063402663 | Metabolism               |
| 0.598977617 | TME                      |
| 0.935152418 | Proliferation/Metastasis |
| 0.993447578 | TME                      |
| 0.434387863 | Proliferation/Metastasis |
| 0.004816137 | Proliferation/Metastasis |
| 0.031405522 | Metabolism               |
| 0.054368899 | Proliferation/Metastasis |
| 0.518749017 | TME                      |
| 0.058688131 | Metabolism               |
| 0.751883976 | TME                      |
| 0.578011545 | TME                      |
| 0.200402976 | TME                      |
| 0.652799473 | TME                      |
| 0.229276013 | TME                      |
| 0.501178885 | TME                      |
| 0.55218959  | Metabolism               |
| 0.267205705 | TME                      |
| 0.076217641 | Metabolism               |
| 0.404618083 | Metabolism               |
| 0.938692443 | Proliferation/Metastasis |
| 0.897129269 | Proliferation/Metastasis |
| 0.891281036 | Metabolism               |
| 0.370021521 | Metabolism               |
| 0.323714864 | Metabolism               |
| 0.039358744 | Metabolism               |
| 0.261272468 | Proliferation/Metastasis |
| 0.640210834 | Proliferation/Metastasis |
| 0.558223091 | Metabolism               |
| 0.01040964  | Metabolism               |
| 0.01483447  | Metabolism               |
| 0.049852059 | TME                      |
| 0.312677809 | Metabolism               |
| 0.228341271 | Metabolism               |
| 0.506586373 | Metabolism               |
| 0.264045471 | Metabolism               |
| 0.242533492 | Proliferation/Metastasis |
| 4.03E-05    | Metabolism               |
| 0.358440595 | Metabolism               |
| 0.358810958 | Metabolism               |
| 0.004847729 | Metabolism               |
| 0.125674514 | Metabolism               |



|             |                          |
|-------------|--------------------------|
| 0.0013008   | Metabolism               |
| 0.549504929 | Proliferation/Metastasis |
| 0.133136316 | Metabolism               |
| 0.133806921 | Metabolism               |
| 0.778282358 | Proliferation/Metastasis |
| 0.491953058 | Metabolism               |
| 0.851497118 | Metabolism               |
| 0.002037446 | Metabolism               |
| 0.917398582 | Metabolism               |
| 0.010246616 | Metabolism               |
| 0.232153737 | Metabolism               |
| 0.377484741 | Metabolism               |
| 0.035388118 | Metabolism               |
| 0.916205177 | TME                      |
| 0.792001316 | TME                      |
| 0.752835604 | TME                      |
| 0.811011235 | TME                      |
| 0.616656729 | TME                      |
| 0.756069965 | Metabolism               |
| 0.005914631 | Metabolism               |
| 0.118777991 | Proliferation/Metastasis |
| 0.160118349 | Metabolism               |
| 0.836601353 | Proliferation/Metastasis |
| 0.25684164  | Metabolism               |
| 0.296119771 | TME                      |
| 0.111061892 | Metabolism               |
| 0.094256419 | Metabolism               |
| 0.645863018 | Metabolism               |
| 0.126033154 | Metabolism               |
| 0.814654966 | TME                      |
| 0.524049563 | TME                      |
| 0.588471364 | Proliferation/Metastasis |
| 0.435873826 | Metabolism               |
| 0.526180501 | Proliferation/Metastasis |
| 0.855157896 | Proliferation/Metastasis |
| 0.006914478 | TME                      |
| 0.000172598 | TME                      |
| 0.000240821 | TME                      |
| 3.58E-06    | TME                      |
| 0.241460148 | Metabolism               |
| 0.667028654 | Proliferation/Metastasis |
| 2.78E-05    | Metabolism               |
| 0.240971046 | Metabolism               |

|             |                          |
|-------------|--------------------------|
| 0.064147616 | Proliferation/Metastasis |
| 4.08E-05    | Proliferation/Metastasis |
| 5.17E-10    | Metabolism               |
| 0.009152465 | Metabolism               |
| 0.017826567 | Metabolism               |
| 0.960719826 | Metabolism               |
| 0.02507479  | TME                      |
| 0.535763596 | TME                      |
| 9.32E-06    | TME                      |
| 5.68E-06    | TME                      |
| 3.65E-31    | TME                      |
| 0.132070446 | Metabolism               |
| 0.002723894 | Metabolism               |
| 4.20E-05    | Metabolism               |
| 0.001686647 | Metabolism               |
| 0.084245599 | Metabolism               |
| 0.006634237 | TME                      |
| 0.087826904 | TME                      |
| 0.254266148 | TME                      |
| 0.000142876 | TME                      |
| 0.002993418 | TME                      |
| 6.52E-06    | TME                      |
| 1.60E-05    | TME                      |
| 0.000473283 | TME                      |
| 1.58E-07    | TME                      |
| 0.440367077 | Proliferation/Metastasis |
| 0.000660995 | Proliferation/Metastasis |
| 0.788928863 | Metabolism               |
| 0.768725273 | Metabolism               |
| 1.78E-07    | TME                      |
| 0.024441268 | Metabolism               |
| 0.085056216 | Metabolism               |
| 0.051138302 | TME                      |
| 0.190427524 | Proliferation/Metastasis |
| 0.208852967 | Proliferation/Metastasis |
| 0.000255498 | TME                      |
| 0.473469453 | Metabolism               |
| 0.00021839  | Metabolism               |
| 0.213902071 | Proliferation/Metastasis |
| 0.019366057 | Proliferation/Metastasis |
| 6.24E-06    | TME                      |
| 0.260606639 | TME                      |
| 4.15E-05    | TME                      |

|             |                          |
|-------------|--------------------------|
| 0.000323601 | TME                      |
| 0.567825651 | Proliferation/Metastasis |
| 0.22472286  | TME                      |
| 0.184838505 | TME                      |
| 0.014118017 | Metabolism               |
| 0.016112418 | TME                      |
| 0.045696155 | TME                      |
| 2.31E-06    | TME                      |
| 0.04947338  | TME                      |
| 0.973261283 | Metabolism               |
| 0.000504536 | Metabolism               |
| 0.000708868 | Metabolism               |
| 0.12359539  | TME                      |
| 0.018084302 | Metabolism               |
| 1.38E-05    | TME                      |
| 0.00032389  | TME                      |
| 0.003694539 | TME                      |
| 0.000599095 | TME                      |
| 0.014119225 | TME                      |
| 0.339608438 | Metabolism               |
| 0.149739407 | Proliferation/Metastasis |
| 0.008770972 | Metabolism               |
| 8.19E-05    | Proliferation/Metastasis |
| 0.002230745 | Metabolism               |
| 0.211977297 | Metabolism               |
| 0.039594    | Metabolism               |
| 0.213791007 | Metabolism               |
| 0.514407211 | Metabolism               |
| 0.002251042 | Metabolism               |
| 0.703117693 | Metabolism               |
| 0.006957799 | Metabolism               |
| 0.858652108 | Metabolism               |
| 0.312260915 | Metabolism               |
| 0.114854574 | Metabolism               |
| 0.052363151 | Metabolism               |
| 0.071166594 | Metabolism               |
| 0.009262426 | Metabolism               |
| 0.05173756  | TME                      |
| 0.030702316 | Proliferation/Metastasis |
| 0.90982898  | Metabolism               |
| 2.66E-11    | Proliferation/Metastasis |
| 9.96E-06    | TME                      |
| 0.501476611 | Proliferation/Metastasis |

|             |                          |
|-------------|--------------------------|
| 0.904862332 | Proliferation/Metastasis |
| 0.479021926 | TME                      |
| 0.42668126  | TME                      |
| 4.05E-07    | Metabolism               |
| 9.93E-05    | Metabolism               |
| 0.042676923 | Proliferation/Metastasis |
| 0.177505241 | Proliferation/Metastasis |
| 0.76539989  | Proliferation/Metastasis |
| 8.26E-06    | Metabolism               |
| 1.90E-05    | Metabolism               |
| 0.00088033  | Metabolism               |
| 0.333444803 | Proliferation/Metastasis |
| 0.282876639 | TME                      |
| 0.217653646 | TME                      |
| 0.00013298  | Metabolism               |
| 0.212674853 | Proliferation/Metastasis |
| 0.097003912 | Metabolism               |
| 1.07E-05    | TME                      |
| 7.28E-07    | TME                      |
| 0.000247975 | TME                      |
| 0.707797835 | TME                      |
| 0.153681388 | Metabolism               |
| 0.002072436 | TME                      |
| 0.240625433 | Proliferation/Metastasis |
| 0.225950294 | TME                      |
| 0.029280261 | Proliferation/Metastasis |
| 0.114925432 | Proliferation/Metastasis |
| 0.822943156 | Metabolism               |
| 0.77144758  | Proliferation/Metastasis |
| 0.003596141 | TME                      |
| 0.570675949 | Metabolism               |
| 0.001526922 | TME                      |
| 0.003158731 | TME                      |
| 0.021457758 | TME                      |
| 0.000461503 | TME                      |
| 4.98E-05    | TME                      |
| 0.000213059 | TME                      |
| 1.35E-06    | Metabolism               |
| 0.000216588 | TME                      |
| 0.602799621 | Metabolism               |
| 0.015077384 | Metabolism               |
| 0.737466392 | Proliferation/Metastasis |
| 0.003986671 | Proliferation/Metastasis |

|             |                          |
|-------------|--------------------------|
| 0.023678866 | Metabolism               |
| 0.079990079 | Metabolism               |
| 0.889488466 | Metabolism               |
| 0.063863367 | Metabolism               |
| 0.00015194  | Proliferation/Metastasis |
| 0.066928776 | Proliferation/Metastasis |
| 0.324897876 | Metabolism               |
| 0.86198338  | Metabolism               |
| 0.043932719 | Metabolism               |
| 0.536465063 | TME                      |
| 2.62E-06    | Metabolism               |
| 0.023348169 | Metabolism               |
| 0.174975154 | Metabolism               |
| 0.010595617 | Metabolism               |
| 0.060829929 | Proliferation/Metastasis |
| 0.700096908 | Metabolism               |
| 0.016751057 | Metabolism               |
| 0.000374298 | Metabolism               |
| 0.370055421 | Metabolism               |
| 0.750433014 | Metabolism               |
| 0.218829284 | Metabolism               |
| 0.99137685  | Proliferation/Metastasis |
| 0.140423378 | Metabolism               |
| 0.835206718 | Metabolism               |
| 0.03210495  | Proliferation/Metastasis |
| 0.000104929 | Metabolism               |
| 0.04582079  | Metabolism               |
| 0.764817252 | Metabolism               |
| 0.490331508 | Metabolism               |
| 0.002854864 | Metabolism               |
| 5.11E-06    | Metabolism               |
| 0.409868535 | Metabolism               |
| 0.034361463 | Metabolism               |
| 0.006233389 | TME                      |
| 0.019366594 | TME                      |
| 0.025449563 | TME                      |
| 0.003076194 | TME                      |
| 3.33E-05    | TME                      |
| 0.007286731 | Metabolism               |
| 0.632583264 | Metabolism               |
| 0.444811196 | Proliferation/Metastasis |
| 0.000197323 | Metabolism               |
| 0.054757013 | Proliferation/Metastasis |

|             |                          |
|-------------|--------------------------|
| 0.012997085 | Metabolism               |
| 3.03E-10    | TME                      |
| 0.092061839 | Metabolism               |
| 0.243211851 | Metabolism               |
| 0.970855658 | Metabolism               |
| 7.82E-05    | Metabolism               |
| 0.690524459 | TME                      |
| 0.075341241 | TME                      |
| 0.126743815 | Proliferation/Metastasis |
| 0.264319468 | Metabolism               |
| 0.021876316 | Proliferation/Metastasis |
| 0.212098567 | Proliferation/Metastasis |
| 0.411383665 | TME                      |
| 0.762081098 | TME                      |
| 0.057474913 | TME                      |
| 0.180566704 | TME                      |
| 0.150363439 | Metabolism               |
| 0.42755019  | Proliferation/Metastasis |
| 0.023338272 | Metabolism               |
| 0.468785663 | Metabolism               |
| 0.005309338 | Proliferation/Metastasis |
| 0.416090769 | Proliferation/Metastasis |
| 0.171004225 | Metabolism               |
| 0.904022905 | Metabolism               |
| 0.000110388 | Metabolism               |
| 3.56E-06    | Metabolism               |
| 0.489378056 | TME                      |
| 0.762405785 | TME                      |
| 0.049358988 | TME                      |
| 0.575117437 | TME                      |
| 0.033045042 | TME                      |
| 0.078622658 | Metabolism               |
| 0.311464237 | Metabolism               |
| 0.001578729 | Metabolism               |
| 0.01565272  | Metabolism               |
| 6.20E-12    | Metabolism               |
| 0.006827099 | TME                      |
| 0.00030309  | TME                      |
| 0.651910815 | TME                      |
| 0.496151189 | TME                      |
| 0.857420751 | TME                      |
| 0.296937161 | TME                      |
| 0.264287992 | TME                      |

|             |                          |
|-------------|--------------------------|
| 0.215245003 | TME                      |
| 0.129306817 | TME                      |
| 0.017562993 | Proliferation/Metastasis |
| 4.64E-05    | Proliferation/Metastasis |
| 0.280777593 | Metabolism               |
| 0.002276335 | Metabolism               |
| 0.326377102 | TME                      |
| 0.733440591 | Metabolism               |
| 7.01E-07    | Metabolism               |
| 0.261731003 | TME                      |
| 0.06339812  | Proliferation/Metastasis |
| 0.426559787 | Proliferation/Metastasis |
| 0.854957567 | TME                      |
| 5.36E-07    | Metabolism               |
| 0.003831271 | Metabolism               |
| 0.018451651 | Proliferation/Metastasis |
| 0.780366228 | Proliferation/Metastasis |
| 0.053980535 | TME                      |
| 0.514203262 | TME                      |
| 0.222009295 | TME                      |
| 0.239471012 | TME                      |
| 0.052383356 | Proliferation/Metastasis |
| 0.564866141 | TME                      |
| 0.097487375 | TME                      |
| 3.07E-07    | Metabolism               |
| 0.017873214 | TME                      |
| 0.138417872 | TME                      |
| 0.322289937 | TME                      |
| 3.80E-05    | TME                      |
| 0.077025349 | Metabolism               |
| 2.14E-05    | Metabolism               |
| 0.171727098 | Metabolism               |
| 0.578234622 | TME                      |
| 0.812342157 | Metabolism               |
| 0.492194751 | TME                      |
| 0.144031491 | TME                      |
| 0.643264657 | TME                      |
| 0.383964422 | TME                      |
| 0.992778544 | TME                      |
| 0.010400369 | Metabolism               |
| 0.000806064 | Proliferation/Metastasis |
| 0.080067716 | Metabolism               |
| 0.934086335 | Proliferation/Metastasis |

|             |                          |
|-------------|--------------------------|
| 0.051430906 | Metabolism               |
| 7.01E-07    | Metabolism               |
| 0.003276881 | Metabolism               |
| 0.056291438 | Metabolism               |
| 0.001759025 | Metabolism               |
| 1.29E-09    | Metabolism               |
| 0.000190146 | Metabolism               |
| 0.979787856 | Metabolism               |
| 0.629879118 | Metabolism               |
| 2.11E-05    | Metabolism               |
| 0.446953612 | Metabolism               |
| 0.755898086 | Metabolism               |
| 0.62313783  | Metabolism               |
| 0.823118396 | Metabolism               |
| 0.032971823 | TME                      |
| 0.007795027 | Proliferation/Metastasis |
| 0.004722179 | Metabolism               |
| 0.274932601 | Proliferation/Metastasis |
| 0.171224362 | TME                      |
| 0.026148852 | Proliferation/Metastasis |
| 0.054242546 | Proliferation/Metastasis |
| 0.015730497 | TME                      |
| 0.117755825 | TME                      |
| 6.77E-07    | Metabolism               |
| 0.000929797 | Metabolism               |
| 0.682664135 | Proliferation/Metastasis |
| 0.005192546 | Proliferation/Metastasis |
| 0.002886597 | Proliferation/Metastasis |
| 0.000141843 | Metabolism               |
| 0.423859597 | Metabolism               |
| 0.998959693 | Metabolism               |
| 0.744030531 | Proliferation/Metastasis |
| 0.297226705 | TME                      |
| 0.543479412 | TME                      |
| 8.18E-08    | Metabolism               |
| 0.669424814 | Proliferation/Metastasis |
| 8.37E-07    | Metabolism               |
| 0.140290777 | TME                      |
| 0.0569235   | TME                      |
| 0.00481548  | TME                      |
| 0.903270419 | TME                      |
| 3.49E-05    | Metabolism               |
| 6.16E-09    | TME                      |



|             |                          |
|-------------|--------------------------|
| 5.10E-07    | Proliferation/Metastasis |
| 0.057843175 | TME                      |
| 0.714695433 | Proliferation/Metastasis |
| 0.002411565 | Proliferation/Metastasis |
| 6.27E-10    | Metabolism               |
| 0.178813125 | Proliferation/Metastasis |
| 0.079832494 | TME                      |
| 0.072766227 | Metabolism               |
| 0.496368099 | TME                      |
| 0.849893544 | TME                      |
| 0.643693754 | TME                      |
| 0.101364146 | TME                      |
| 0.011210336 | TME                      |
| 0.12985558  | TME                      |
| 0.658531245 | Metabolism               |
| 0.004351311 | TME                      |
| 0.478544444 | Metabolism               |
| 2.36E-08    | Metabolism               |
| 0.000287977 | Proliferation/Metastasis |
| 0.500800703 | Proliferation/Metastasis |
| 0.010901681 | Metabolism               |
| 0.526304607 | Metabolism               |
| 1.37E-14    | Metabolism               |
| 0.286145686 | Metabolism               |
| 0.105982135 | Proliferation/Metastasis |
| 7.91E-10    | Proliferation/Metastasis |
| 0.242604434 | Metabolism               |
| 2.76E-05    | Metabolism               |
| 0.294543301 | Metabolism               |
| 0.474967261 | TME                      |
| 0.796046118 | Metabolism               |
| 0.676267765 | Metabolism               |
| 0.610171413 | Metabolism               |
| 0.022000513 | Metabolism               |
| 0.075120274 | Proliferation/Metastasis |
| 0.097698763 | Metabolism               |
| 0.96609831  | Metabolism               |
| 1.80E-05    | Metabolism               |
| 0.959619848 | Metabolism               |
| 0.808241726 | Metabolism               |
| 0.007509998 | Metabolism               |
| 0.840818288 | Proliferation/Metastasis |
| 5.69E-09    | Metabolism               |

|             |                          |
|-------------|--------------------------|
| 0.14038101  | Metabolism               |
| 0.003116674 | Proliferation/Metastasis |
| 0.027276959 | Metabolism               |
| 0.09317746  | Metabolism               |
| 7.12E-08    | Metabolism               |
| 0.003879026 | Metabolism               |
| 0.595443648 | Metabolism               |
| 0.000610556 | Metabolism               |
| 0.000257032 | Metabolism               |
| 0.002303124 | Metabolism               |
| 0.104814409 | TME                      |
| 0.002380424 | TME                      |
| 0.081390897 | TME                      |
| 0.260241877 | TME                      |
| 0.659526478 | TME                      |
| 0.075090716 | Metabolism               |
| 0.047351507 | Metabolism               |
| 0.106848958 | Proliferation/Metastasis |
| 0.113903254 | Metabolism               |
| 0.019453941 | Proliferation/Metastasis |
| 0.192887905 | Metabolism               |
| 0.913947903 | TME                      |
| 0.708819872 | Metabolism               |
| 0.042752982 | Metabolism               |
| 0.063425745 | Metabolism               |
| 0.010666328 | Metabolism               |
| 0.187517892 | TME                      |
| 0.397821327 | TME                      |
| 0.03097787  | Proliferation/Metastasis |
| 0.972644581 | Metabolism               |
| 0.053329277 | Proliferation/Metastasis |
| 0.00032003  | Proliferation/Metastasis |
| 2.41E-09    | TME                      |
| 1.44E-06    | TME                      |
| 1.22E-08    | TME                      |
| 1.90E-07    | TME                      |
| 2.85E-16    | Metabolism               |
| 9.98E-16    | Proliferation/Metastasis |
| 0.239344237 | Metabolism               |
| 9.73E-16    | Metabolism               |
| 1.52E-06    | Proliferation/Metastasis |
| 0.000472668 | Proliferation/Metastasis |
| 0.00119856  | Metabolism               |

|             |                          |
|-------------|--------------------------|
| 6.73E-14    | Metabolism               |
| 2.27E-06    | Metabolism               |
| 0.046974093 | Metabolism               |
| 1.08E-06    | TME                      |
| 9.41E-23    | TME                      |
| 3.10E-13    | TME                      |
| 2.99E-05    | TME                      |
| 0.506636431 | TME                      |
| 0.406300009 | Metabolism               |
| 2.40E-05    | Metabolism               |
| 8.63E-09    | Metabolism               |
| 3.03E-08    | Metabolism               |
| 0.327367019 | Metabolism               |
| 2.86E-14    | TME                      |
| 0.005543214 | TME                      |
| 1.96E-12    | TME                      |
| 2.41E-11    | TME                      |
| 3.66E-05    | TME                      |
| 1.62E-11    | TME                      |
| 4.69E-10    | TME                      |
| 0.000854465 | TME                      |
| 3.91E-07    | TME                      |
| 4.88E-27    | Proliferation/Metastasis |
| 1.11E-15    | Proliferation/Metastasis |
| 5.48E-20    | Metabolism               |
| 2.66E-29    | Metabolism               |
| 1.08E-14    | TME                      |
| 0.006985638 | Metabolism               |
| 0.135422221 | Metabolism               |
| 1.39E-16    | TME                      |
| 6.45E-40    | Proliferation/Metastasis |
| 1.15E-40    | Proliferation/Metastasis |
| 2.42E-06    | TME                      |
| 0.003873245 | Metabolism               |
| 5.82E-21    | Metabolism               |
| 5.21E-40    | Proliferation/Metastasis |
| 2.07E-18    | Proliferation/Metastasis |
| 3.02E-17    | TME                      |
| 1.34E-14    | TME                      |
| 4.73E-14    | TME                      |
| 7.74E-10    | TME                      |
| 6.18E-29    | Proliferation/Metastasis |
| 5.10E-21    | TME                      |

|             |                          |
|-------------|--------------------------|
| 7.20E-09    | TME                      |
| 0.43350646  | Metabolism               |
| 1.99E-17    | TME                      |
| 2.01E-12    | TME                      |
| 1.00E-05    | TME                      |
| 0.250963048 | TME                      |
| 5.46E-05    | Metabolism               |
| 0.926670986 | Metabolism               |
| 6.02E-14    | Metabolism               |
| 1.19E-22    | TME                      |
| 3.94E-14    | Metabolism               |
| 7.60E-16    | TME                      |
| 4.82E-14    | TME                      |
| 1.98E-09    | TME                      |
| 0.789508979 | TME                      |
| 0.855771571 | TME                      |
| 6.95E-13    | Metabolism               |
| 1.30E-32    | Proliferation/Metastasis |
| 7.20E-10    | Metabolism               |
| 7.62E-17    | Proliferation/Metastasis |
| 5.28E-15    | Metabolism               |
| 0.000514553 | Metabolism               |
| 0.003125399 | Metabolism               |
| 3.53E-10    | Metabolism               |
| 9.50E-11    | Metabolism               |
| 0.008605371 | Metabolism               |
| 0.010933854 | Metabolism               |
| 0.007780828 | Metabolism               |
| 0.908511128 | Metabolism               |
| 0.000152906 | Metabolism               |
| 0.927867842 | Metabolism               |
| 0.012167399 | Metabolism               |
| 3.43E-24    | Metabolism               |
| 1.97E-22    | Metabolism               |
| 6.62E-08    | TME                      |
| 7.24E-22    | Proliferation/Metastasis |
| 0.011499058 | Metabolism               |
| 0.069853779 | Proliferation/Metastasis |
| 1.24E-09    | TME                      |
| 1.77E-08    | Proliferation/Metastasis |
| 8.81E-06    | Proliferation/Metastasis |
| 0.012045464 | TME                      |
| 0.000189589 | TME                      |

|             |                          |
|-------------|--------------------------|
| 4.98E-16    | Metabolism               |
| 3.15E-15    | Metabolism               |
| 4.97E-10    | Proliferation/Metastasis |
| 2.26E-36    | Proliferation/Metastasis |
| 2.05E-15    | Proliferation/Metastasis |
| 0.177834048 | Metabolism               |
| 3.39E-05    | Metabolism               |
| 0.00244892  | Metabolism               |
| 0.974008979 | Proliferation/Metastasis |
| 5.96E-09    | TME                      |
| 8.64E-09    | TME                      |
| 0.010505439 | Metabolism               |
| 2.64E-21    | Proliferation/Metastasis |
| 1.37E-05    | Metabolism               |
| 1.30E-16    | TME                      |
| 1.21E-13    | TME                      |
| 1.05E-13    | TME                      |
| 1.19E-22    | TME                      |
| 0.466328916 | Metabolism               |
| 1.35E-09    | TME                      |
| 0.829134383 | Proliferation/Metastasis |
| 2.97E-08    | TME                      |
| 6.96E-11    | Proliferation/Metastasis |
| 2.28E-35    | Proliferation/Metastasis |
| 0.085981408 | Metabolism               |
| 4.87E-45    | Proliferation/Metastasis |
| 1.94E-12    | TME                      |
| 3.79E-32    | Metabolism               |
| 0.000103709 | TME                      |
| 1.62E-23    | TME                      |
| 5.12E-22    | TME                      |
| 1.35E-09    | TME                      |
| 0.018160411 | TME                      |
| 1.77E-12    | TME                      |
| 0.068514908 | Metabolism               |
| 0.083215189 | TME                      |
| 0.000256943 | Metabolism               |
| 0.155590298 | Metabolism               |
| 0.002249383 | Proliferation/Metastasis |
| 0.70129682  | Proliferation/Metastasis |
| 4.43E-27    | Metabolism               |
| 0.000626546 | Metabolism               |
| 0.002909551 | Metabolism               |

|             |                          |
|-------------|--------------------------|
| 2.55E-15    | Metabolism               |
| 0.023708633 | Proliferation/Metastasis |
| 3.94E-05    | Proliferation/Metastasis |
| 2.31E-05    | Metabolism               |
| 1.37E-07    | Metabolism               |
| 5.04E-28    | Metabolism               |
| 9.00E-21    | TME                      |
| 0.138010853 | Metabolism               |
| 4.53E-16    | Metabolism               |
| 4.64E-06    | Metabolism               |
| 1.66E-07    | Metabolism               |
| 0.008994493 | Proliferation/Metastasis |
| 1.43E-14    | Metabolism               |
| 0.00176628  | Metabolism               |
| 0.009963798 | Metabolism               |
| 1.61E-42    | Metabolism               |
| 6.00E-51    | Metabolism               |
| 1.17E-13    | Metabolism               |
| 6.49E-08    | Proliferation/Metastasis |
| 0.291878431 | Metabolism               |
| 4.26E-24    | Metabolism               |
| 8.31E-17    | Proliferation/Metastasis |
| 1.30E-16    | Metabolism               |
| 0.00030933  | Metabolism               |
| 0.000230258 | Metabolism               |
| 0.00310529  | Metabolism               |
| 5.27E-24    | Metabolism               |
| 0.088216341 | Metabolism               |
| 2.02E-10    | Metabolism               |
| 0.000153495 | Metabolism               |
| 6.00E-15    | TME                      |
| 0.000282516 | TME                      |
| 1.40E-06    | TME                      |
| 6.09E-12    | TME                      |
| 1.33E-09    | TME                      |
| 0.01191679  | Metabolism               |
| 1.15E-24    | Metabolism               |
| 6.54E-21    | Proliferation/Metastasis |
| 1.51E-15    | Metabolism               |
| 0.00669335  | Proliferation/Metastasis |
| 0.569294287 | Metabolism               |
| 0.924877638 | TME                      |
| 0.080622276 | Metabolism               |

|             |                          |
|-------------|--------------------------|
| 5.55E-19    | Metabolism               |
| 1.28E-05    | Metabolism               |
| 3.04E-06    | Metabolism               |
| 2.80E-10    | TME                      |
| 5.29E-22    | TME                      |
| 0.001652808 | Proliferation/Metastasis |
| 8.84E-12    | Metabolism               |
| 0.001327742 | Proliferation/Metastasis |
| 0.26320091  | Proliferation/Metastasis |
| 1.12E-10    | TME                      |
| 2.05E-05    | TME                      |
| 7.05E-08    | TME                      |
| 6.10E-08    | TME                      |
| 0.000512546 | Metabolism               |
| 0.5148284   | Proliferation/Metastasis |
| 0.0589458   | Metabolism               |
| 0.523352453 | Metabolism               |
| 9.07E-08    | Proliferation/Metastasis |
| 6.81E-11    | Proliferation/Metastasis |
| 1.33E-07    | Metabolism               |
| 0.649202864 | Metabolism               |
| 0.497443772 | Metabolism               |
| 0.314080382 | Metabolism               |
| 0.000155848 | TME                      |
| 1.43E-19    | TME                      |
| 4.05E-11    | TME                      |
| 0.009002356 | TME                      |
| 0.005252826 | TME                      |
| 1.37E-07    | Metabolism               |
| 0.704878774 | Metabolism               |
| 0.739207963 | Metabolism               |
| 0.782601495 | Metabolism               |
| 0.269979648 | Metabolism               |
| 2.27E-09    | TME                      |
| 0.00056752  | TME                      |
| 2.76E-14    | TME                      |
| 1.13E-07    | TME                      |
| 9.01E-06    | TME                      |
| 4.94E-08    | TME                      |
| 9.66E-08    | TME                      |
| 3.99E-05    | TME                      |
| 1.42E-07    | TME                      |
| 1.17E-09    | Proliferation/Metastasis |

|             |                          |
|-------------|--------------------------|
| 1.13E-08    | Proliferation/Metastasis |
| 0.000270964 | Metabolism               |
| 3.78E-06    | Metabolism               |
| 6.75E-10    | TME                      |
| 0.000749349 | Metabolism               |
| 0.001479655 | Metabolism               |
| 8.92E-14    | TME                      |
| 1.37E-07    | Proliferation/Metastasis |
| 1.77E-10    | Proliferation/Metastasis |
| 5.00E-05    | TME                      |
| 0.000342877 | Metabolism               |
| 0.091902329 | Metabolism               |
| 1.39E-13    | Proliferation/Metastasis |
| 7.80E-16    | Proliferation/Metastasis |
| 2.50E-09    | TME                      |
| 4.93E-14    | TME                      |
| 3.20E-10    | TME                      |
| 2.89E-07    | TME                      |
| 0.008653046 | Proliferation/Metastasis |
| 4.96E-16    | TME                      |
| 4.34E-12    | TME                      |
| 0.021679133 | Metabolism               |
| 4.23E-17    | TME                      |
| 4.19E-14    | TME                      |
| 3.11E-05    | TME                      |
| 0.397409339 | TME                      |
| 0.272964663 | Metabolism               |
| 0.000418892 | Metabolism               |
| 0.849722363 | Metabolism               |
| 7.76E-16    | TME                      |
| 0.838854697 | Metabolism               |
| 1.50E-09    | TME                      |
| 9.00E-09    | TME                      |
| 8.01E-08    | TME                      |
| 0.188409124 | TME                      |
| 0.701317588 | TME                      |
| 0.557132251 | Metabolism               |
| 8.81E-13    | Proliferation/Metastasis |
| 0.883032393 | Metabolism               |
| 7.49E-09    | Proliferation/Metastasis |
| 0.82379367  | Metabolism               |
| 0.625364001 | Metabolism               |
| 0.150700671 | Metabolism               |



|             |                          |
|-------------|--------------------------|
| 0.07778711  | Metabolism               |
| 0.547014884 | Metabolism               |
| 9.61E-06    | Metabolism               |
| 0.004501972 | Metabolism               |
| 0.009296478 | Metabolism               |
| 6.51E-08    | Metabolism               |
| 9.22E-17    | Metabolism               |
| 3.33E-06    | Metabolism               |
| 0.00309801  | Metabolism               |
| 3.95E-09    | Metabolism               |
| 4.64E-05    | Metabolism               |
| 1.48E-11    | TME                      |
| 2.07E-07    | Proliferation/Metastasis |
| 2.17E-08    | Metabolism               |
| 2.11E-08    | Proliferation/Metastasis |
| 3.50E-07    | TME                      |
| 9.19E-20    | Proliferation/Metastasis |
| 2.69E-15    | Proliferation/Metastasis |
| 1.44E-13    | TME                      |
| 2.44E-09    | TME                      |
| 1.58E-09    | Metabolism               |
| 1.87E-13    | Metabolism               |
| 0.544411299 | Proliferation/Metastasis |
| 7.95E-14    | Proliferation/Metastasis |
| 8.22E-21    | Proliferation/Metastasis |
| 0.589821125 | Metabolism               |
| 0.018243645 | Metabolism               |
| 0.039178145 | Metabolism               |
| 6.94E-07    | Proliferation/Metastasis |
| 3.48E-12    | TME                      |
| 1.04E-11    | TME                      |
| 0.031176127 | Metabolism               |
| 1.39E-19    | Proliferation/Metastasis |
| 3.94E-15    | Metabolism               |
| 6.51E-09    | TME                      |
| 4.67E-12    | TME                      |
| 1.06E-12    | TME                      |
| 2.14E-15    | TME                      |
| 0.001226355 | Metabolism               |
| 0.386316272 | TME                      |
| 0.112908587 | Proliferation/Metastasis |
| 2.46E-15    | TME                      |
| 9.72E-08    | Proliferation/Metastasis |

|             |                          |
|-------------|--------------------------|
| 0.003743689 | Proliferation/Metastasis |
| 5.46E-10    | Metabolism               |
| 1.19E-09    | Proliferation/Metastasis |
| 2.87E-12    | TME                      |
| 0.000146313 | Metabolism               |
| 0.000254338 | TME                      |
| 3.01E-12    | TME                      |
| 3.33E-07    | TME                      |
| 4.75E-10    | TME                      |
| 0.69830501  | TME                      |
| 1.36E-08    | TME                      |
| 0.056433802 | Metabolism               |
| 9.67E-09    | TME                      |
| 4.67E-09    | Metabolism               |
| 0.022960434 | Metabolism               |
| 1.52E-08    | Proliferation/Metastasis |
| 1.97E-06    | Proliferation/Metastasis |
| 5.08E-05    | Metabolism               |
| 0.739943498 | Metabolism               |
| 2.71E-08    | Metabolism               |
| 0.552969211 | Metabolism               |
| 0.000238361 | Proliferation/Metastasis |
| 0.135069937 | Proliferation/Metastasis |
| 0.579883005 | Metabolism               |
| 0.444174807 | Metabolism               |
| 0.001132238 | Metabolism               |
| 7.32E-11    | TME                      |
| 0.000144324 | Metabolism               |
| 2.44E-05    | Metabolism               |
| 0.152909896 | Metabolism               |
| 1.13E-08    | Metabolism               |
| 0.000161489 | Proliferation/Metastasis |
| 0.728897423 | Metabolism               |
| 0.040170528 | Metabolism               |
| 0.813371022 | Metabolism               |
| 0.003529459 | Metabolism               |
| 7.47E-09    | Metabolism               |
| 0.006688634 | Metabolism               |
| 1.02E-05    | Proliferation/Metastasis |
| 0.007549987 | Metabolism               |
| 0.029068744 | Metabolism               |
| 9.50E-16    | Proliferation/Metastasis |
| 6.68E-06    | Metabolism               |

|             |                          |
|-------------|--------------------------|
| 0.415196826 | Metabolism               |
| 0.295172479 | Metabolism               |
| 2.42E-08    | Metabolism               |
| 2.94E-09    | Metabolism               |
| 0.101301325 | Metabolism               |
| 0.819817588 | Metabolism               |
| 0.819887142 | Metabolism               |
| 1.84E-11    | TME                      |
| 2.85E-06    | TME                      |
| 1.98E-05    | TME                      |
| 5.51E-11    | TME                      |
| 3.27E-07    | TME                      |
| 0.415179806 | Metabolism               |
| 0.000129535 | Metabolism               |
| 6.10E-16    | Proliferation/Metastasis |
| 0.036799832 | Metabolism               |
| 9.04E-11    | Proliferation/Metastasis |
| 0.000359165 | Metabolism               |
| 0.801467934 | TME                      |
| 7.56E-08    | Metabolism               |
| 0.15683065  | Metabolism               |
| 0.043933782 | Metabolism               |
| 0.513377055 | Metabolism               |
| 4.72E-10    | TME                      |
| 7.57E-11    | TME                      |
| 8.92E-11    | Proliferation/Metastasis |
| 0.004151451 | Metabolism               |
| 0.029818913 | Proliferation/Metastasis |
| 0.562870696 | Proliferation/Metastasis |
| 2.87E-05    | TME                      |
| 0.15395462  | TME                      |
| 0.596454486 | TME                      |
| 0.35124658  | TME                      |
| 0.025248425 | Metabolism               |
| 1.46E-05    | Proliferation/Metastasis |
| 8.31E-05    | Metabolism               |
| 4.78E-12    | Metabolism               |
| 0.093819607 | Proliferation/Metastasis |
| 0.000624444 | Proliferation/Metastasis |
| 1.11E-08    | Metabolism               |
| 1.05E-05    | Metabolism               |
| 1.73E-07    | Metabolism               |
| 0.007955264 | Metabolism               |

|             |                          |
|-------------|--------------------------|
| 0.092724245 | TME                      |
| 0.511571026 | TME                      |
| 0.17302028  | TME                      |
| 4.88E-05    | TME                      |
| 1.45E-15    | TME                      |
| 0.141445659 | Metabolism               |
| 4.01E-06    | Metabolism               |
| 0.09906329  | Metabolism               |
| 0.103569353 | Metabolism               |
| 0.002475053 | Metabolism               |
| 0.229494975 | TME                      |
| 0.299149508 | TME                      |
| 0.613764064 | TME                      |
| 0.107586128 | TME                      |
| 0.851214333 | TME                      |
| 0.100120031 | TME                      |
| 0.197995822 | TME                      |
| 0.800081475 | TME                      |
| 0.012552693 | TME                      |
| 0.277736277 | Proliferation/Metastasis |
| 0.329813682 | Proliferation/Metastasis |
| 0.000355665 | Metabolism               |
| 3.56E-05    | Metabolism               |
| 0.000295705 | TME                      |
| 8.99E-06    | Metabolism               |
| 0.954514419 | Metabolism               |
| 0.800842353 | TME                      |
| 1.59E-05    | Proliferation/Metastasis |
| 0.013587994 | Proliferation/Metastasis |
| 0.35396872  | TME                      |
| 0.014823645 | Metabolism               |
| 1.81E-13    | Metabolism               |
| 0.071118831 | Proliferation/Metastasis |
| 0.387934635 | Proliferation/Metastasis |
| 0.004249657 | TME                      |
| 0.82080117  | TME                      |
| 0.072402518 | TME                      |
| 0.202005184 | TME                      |
| 0.005908089 | Proliferation/Metastasis |
| 0.042490302 | TME                      |
| 0.423954086 | TME                      |
| 0.001410075 | Metabolism               |
| 0.542624977 | TME                      |

|             |                          |
|-------------|--------------------------|
| 0.84506174  | TME                      |
| 0.172807712 | TME                      |
| 0.453980982 | TME                      |
| 0.40252838  | Metabolism               |
| 0.66580257  | Metabolism               |
| 1.77E-09    | Metabolism               |
| 0.872724143 | TME                      |
| 2.38E-06    | Metabolism               |
| 0.021533547 | TME                      |
| 0.00313831  | TME                      |
| 0.686595269 | TME                      |
| 0.908773454 | TME                      |
| 0.091187524 | TME                      |
| 7.55E-13    | Metabolism               |
| 0.224007231 | Proliferation/Metastasis |
| 2.01E-16    | Metabolism               |
| 0.002668814 | Proliferation/Metastasis |
| 1.11E-15    | Metabolism               |
| 0.00024991  | Metabolism               |
| 1.61E-05    | Metabolism               |
| 3.57E-05    | Metabolism               |
| 2.82E-08    | Metabolism               |
| 0.0265035   | Metabolism               |
| 0.665099549 | Metabolism               |
| 4.68E-08    | Metabolism               |
| 7.66E-06    | Metabolism               |
| 0.006462283 | Metabolism               |
| 0.018581104 | Metabolism               |
| 1.55E-05    | Metabolism               |
| 0.280086482 | Metabolism               |
| 0.075749878 | Metabolism               |
| 0.529891226 | TME                      |
| 0.000900881 | Proliferation/Metastasis |
| 0.563393641 | Metabolism               |
| 2.76E-12    | Proliferation/Metastasis |
| 0.212544051 | TME                      |
| 0.00432085  | Proliferation/Metastasis |
| 0.000244467 | Proliferation/Metastasis |
| 0.16872659  | TME                      |
| 0.000654022 | TME                      |
| 4.06E-06    | Metabolism               |
| 0.027633142 | Metabolism               |
| 0.000491537 | Proliferation/Metastasis |

|             |                          |
|-------------|--------------------------|
| 0.032817426 | Proliferation/Metastasis |
| 0.155899363 | Proliferation/Metastasis |
| 0.002034677 | Metabolism               |
| 0.050346161 | Metabolism               |
| 0.000384022 | Metabolism               |
| 9.65E-07    | Proliferation/Metastasis |
| 0.138521661 | TME                      |
| 0.343931812 | TME                      |
| 0.000148257 | Metabolism               |
| 0.646913303 | Proliferation/Metastasis |
| 0.103677858 | Metabolism               |
| 0.002948782 | TME                      |
| 0.026355209 | TME                      |
| 0.316253433 | TME                      |
| 0.201967188 | TME                      |
| 3.50E-05    | Metabolism               |
| 0.000322132 | TME                      |
| 0.0078779   | Proliferation/Metastasis |
| 1.83E-05    | TME                      |
| 0.032253333 | Proliferation/Metastasis |
| 5.64E-12    | Proliferation/Metastasis |
| 0.739391159 | Metabolism               |
| 0.000132789 | Proliferation/Metastasis |
| 0.510240285 | TME                      |
| 0.000725405 | Metabolism               |
| 0.397228365 | TME                      |
| 0.000234601 | TME                      |
| 3.35E-06    | TME                      |
| 0.424085735 | TME                      |
| 0.183462265 | TME                      |
| 0.369255925 | TME                      |
| 1.44E-11    | Metabolism               |
| 7.14E-09    | TME                      |
| 0.006628775 | Metabolism               |
| 0.366327535 | Metabolism               |
| 0.000124453 | Proliferation/Metastasis |
| 0.110460965 | Proliferation/Metastasis |
| 0.502822152 | Metabolism               |
| 0.061596984 | Metabolism               |
| 0.656005737 | Metabolism               |
| 5.84E-13    | Metabolism               |
| 5.27E-11    | Proliferation/Metastasis |
| 0.294523075 | Proliferation/Metastasis |

|             |                          |
|-------------|--------------------------|
| 2.13E-05    | Metabolism               |
| 1.06E-06    | Metabolism               |
| 2.26E-14    | Metabolism               |
| 0.430153707 | TME                      |
| 1.34E-07    | Metabolism               |
| 2.10E-06    | Metabolism               |
| 0.041449547 | Metabolism               |
| 0.000258174 | Metabolism               |
| 9.71E-08    | Proliferation/Metastasis |
| 2.12E-10    | Metabolism               |
| 0.114712941 | Metabolism               |
| 0.437171424 | Metabolism               |
| 0.000282134 | Metabolism               |
| 1.50E-05    | Metabolism               |
| 0.067344645 | Metabolism               |
| 0.191788291 | Proliferation/Metastasis |
| 1.76E-05    | Metabolism               |
| 1.11E-06    | Metabolism               |
| 0.009651248 | Proliferation/Metastasis |
| 0.654562079 | Metabolism               |
| 6.18E-06    | Metabolism               |
| 0.000268285 | Metabolism               |
| 0.045913047 | Metabolism               |
| 7.15E-06    | Metabolism               |
| 1.14E-10    | Metabolism               |
| 0.001978759 | Metabolism               |
| 0.099096608 | Metabolism               |
| 0.627625488 | TME                      |
| 0.114718042 | TME                      |
| 0.091993949 | TME                      |
| 0.758743079 | TME                      |
| 0.217446523 | TME                      |
| 0.759813265 | Metabolism               |
| 0.000151051 | Metabolism               |
| 0.00064903  | Proliferation/Metastasis |
| 1.20E-06    | Metabolism               |
| 1.97E-08    | Proliferation/Metastasis |
| 0.73823068  | Metabolism               |
| 8.45E-10    | TME                      |
| 0.050833352 | Metabolism               |
| 4.25E-07    | Metabolism               |
| 2.85E-06    | Metabolism               |
| 0.411556073 | Metabolism               |

|             |                          |
|-------------|--------------------------|
| 0.050797523 | TME                      |
| 0.170249457 | TME                      |
| 4.03E-05    | Proliferation/Metastasis |
| 0.102410578 | Metabolism               |
| 0.012904132 | Proliferation/Metastasis |
| 0.000282782 | Proliferation/Metastasis |
| 0.522079997 | TME                      |
| 0.77062207  | TME                      |
| 0.437638823 | TME                      |
| 0.586698191 | TME                      |
| 0.000140896 | Metabolism               |
| 0.004463737 | Proliferation/Metastasis |
| 0.085618613 | Metabolism               |
| 0.000386711 | Metabolism               |
| 0.000160542 | Proliferation/Metastasis |
| 0.01066359  | Proliferation/Metastasis |
| 0.861387722 | Metabolism               |
| 2.29E-06    | Metabolism               |
| 3.41E-05    | Metabolism               |
| 0.348560442 | Metabolism               |
| 0.619227064 | TME                      |
| 0.722629178 | TME                      |
| 0.495286481 | TME                      |
| 0.959190734 | TME                      |
| 0.653487705 | TME                      |
| 3.64E-05    | Metabolism               |
| 0.000168653 | Metabolism               |
| 0.000496364 | Metabolism               |
| 8.32E-05    | Metabolism               |
| 0.131590703 | Metabolism               |
| 0.71831007  | TME                      |
| 0.401288285 | TME                      |
| 0.412004979 | TME                      |
| 0.542123331 | TME                      |
| 0.921017176 | TME                      |
| 0.452237084 | TME                      |
| 0.548897965 | TME                      |
| 0.350429814 | TME                      |
| 0.704441244 | TME                      |
| 0.01956343  | Proliferation/Metastasis |
| 0.012860327 | Proliferation/Metastasis |
| 0.000734141 | Metabolism               |
| 0.016500442 | Metabolism               |



|             |                          |
|-------------|--------------------------|
| 0.241100432 | TME                      |
| 7.00E-05    | Metabolism               |
| 0.143713428 | Metabolism               |
| 0.499683037 | TME                      |
| 0.042829037 | Proliferation/Metastasis |
| 0.109995054 | Proliferation/Metastasis |
| 0.708409927 | TME                      |
| 0.289638244 | Metabolism               |
| 0.041469998 | Metabolism               |
| 0.035804776 | Proliferation/Metastasis |
| 0.200872534 | Proliferation/Metastasis |
| 0.541166058 | TME                      |
| 0.701373892 | TME                      |
| 0.446145635 | TME                      |
| 0.868249825 | TME                      |
| 0.00048647  | Proliferation/Metastasis |
| 0.337996781 | TME                      |
| 0.615800981 | TME                      |
| 0.006875747 | Metabolism               |
| 0.155235472 | TME                      |
| 0.133233039 | TME                      |
| 0.471393384 | TME                      |
| 0.000833828 | TME                      |
| 0.012313234 | Metabolism               |
| 3.20E-06    | Metabolism               |
| 0.000454128 | Metabolism               |
| 0.454833556 | TME                      |
| 0.00014741  | Metabolism               |
| 0.375252978 | TME                      |
| 0.412682894 | TME                      |
| 0.323236178 | TME                      |
| 0.283699586 | TME                      |
| 0.623474729 | TME                      |
| 2.99E-05    | Metabolism               |
| 0.005648148 | Proliferation/Metastasis |
| 0.000717548 | Metabolism               |
| 0.508849849 | Proliferation/Metastasis |
| 0.021918705 | Metabolism               |
| 4.12E-06    | Metabolism               |
| 0.000687865 | Metabolism               |
| 0.012050519 | Metabolism               |
| 0.000109859 | Metabolism               |
| 0.063482499 | Metabolism               |

|             |                          |
|-------------|--------------------------|
| 0.043661936 | Metabolism               |
| 0.006677516 | Metabolism               |
| 0.038897427 | Metabolism               |
| 0.576101413 | Metabolism               |
| 0.053558937 | Metabolism               |
| 0.082524461 | Metabolism               |
| 0.371927115 | Metabolism               |
| 0.000114549 | Metabolism               |
| 0.782797468 | TME                      |
| 0.527825465 | Proliferation/Metastasis |
| 0.010328206 | Metabolism               |
| 0.028726975 | Proliferation/Metastasis |
| 0.325828329 | TME                      |
| 0.007715242 | Proliferation/Metastasis |
| 0.106213006 | Proliferation/Metastasis |
| 0.064055293 | TME                      |
| 0.440003295 | TME                      |
| 0.000859232 | Metabolism               |
| 0.165503843 | Metabolism               |
| 0.001088159 | Proliferation/Metastasis |
| 0.008193421 | Proliferation/Metastasis |
| 0.052076581 | Proliferation/Metastasis |
| 0.673405849 | Metabolism               |
| 0.575791342 | Metabolism               |
| 8.95E-07    | Metabolism               |
| 0.048590686 | Proliferation/Metastasis |
| 0.407633708 | TME                      |
| 0.596110175 | TME                      |
| 0.021148825 | Metabolism               |
| 0.211045658 | Proliferation/Metastasis |
| 0.009251793 | Metabolism               |
| 0.431043385 | TME                      |
| 0.516871536 | TME                      |
| 0.312473623 | TME                      |
| 0.639835812 | TME                      |
| 0.329434154 | Metabolism               |
| 0.087142335 | TME                      |
| 1.08E-05    | Proliferation/Metastasis |
| 0.345496057 | TME                      |
| 0.010194089 | Proliferation/Metastasis |
| 0.007460647 | Proliferation/Metastasis |
| 0.000846667 | Metabolism               |
| 0.139545803 | Proliferation/Metastasis |

|             |                          |
|-------------|--------------------------|
| 0.74049961  | TME                      |
| 0.001208222 | Metabolism               |
| 0.351351047 | TME                      |
| 0.124845191 | TME                      |
| 0.122268619 | TME                      |
| 0.347261445 | TME                      |
| 0.218167845 | TME                      |
| 0.500506209 | TME                      |
| 0.003529282 | Metabolism               |
| 0.96829759  | TME                      |
| 0.000491749 | Metabolism               |
| 0.11781701  | Metabolism               |
| 0.004650194 | Proliferation/Metastasis |
| 0.036109905 | Proliferation/Metastasis |
| 0.000136129 | Metabolism               |
| 0.033754639 | Metabolism               |
| 0.148074997 | Metabolism               |
| 0.489487102 | Metabolism               |
| 0.009359479 | Proliferation/Metastasis |
| 0.000145279 | Proliferation/Metastasis |
| 0.007496711 | Metabolism               |
| 0.179949371 | Metabolism               |
| 0.027490193 | Metabolism               |
| 0.615102119 | TME                      |
| 0.755540088 | Metabolism               |
| 0.69310847  | Metabolism               |
| 0.417422776 | Metabolism               |
| 0.030404176 | Metabolism               |
| 0.053317468 | Proliferation/Metastasis |
| 0.128966123 | Metabolism               |
| 0.150622759 | Metabolism               |
| 4.43E-05    | Metabolism               |
| 2.57E-06    | Metabolism               |
| 0.001212341 | Metabolism               |
| 3.99E-05    | Metabolism               |
| 0.042482875 | Proliferation/Metastasis |
| 0.462275959 | Metabolism               |
| 0.041336459 | Metabolism               |
| 0.530914174 | Proliferation/Metastasis |
| 0.025581125 | Metabolism               |
| 0.100228154 | Metabolism               |
| 6.11E-06    | Metabolism               |
| 0.003029419 | Metabolism               |

|             |                          |
|-------------|--------------------------|
| 0.070249489 | Metabolism               |
| 0.612403036 | Metabolism               |
| 0.000272325 | Metabolism               |
| 8.10E-07    | Metabolism               |
| 0.294861429 | TME                      |
| 0.618119732 | TME                      |
| 0.374589574 | TME                      |
| 0.168777412 | TME                      |
| 0.174655053 | TME                      |
| 0.271361714 | Metabolism               |
| 0.000278096 | Metabolism               |
| 0.447333521 | Proliferation/Metastasis |
| 0.008321568 | Metabolism               |
| 0.254654749 | Proliferation/Metastasis |
| 0.002713296 | Metabolism               |
| 0.896475222 | TME                      |
| 0.350056633 | Metabolism               |
| 0.06237471  | Metabolism               |
| 0.037231489 | Metabolism               |
| 6.46E-06    | Metabolism               |
| 0.589934198 | TME                      |
| 0.200725775 | TME                      |
| 7.91E-05    | Proliferation/Metastasis |
| 0.036478444 | Metabolism               |
| 0.134888512 | Proliferation/Metastasis |
| 0.014111231 | Proliferation/Metastasis |
| 0.00086794  | TME                      |
| 0.010608239 | TME                      |
| 0.395390729 | TME                      |
| 0.229257851 | TME                      |
| 3.98E-07    | Metabolism               |
| 1.17E-07    | Proliferation/Metastasis |
| 0.005702427 | Metabolism               |
| 2.72E-19    | Metabolism               |
| 0.00032473  | Proliferation/Metastasis |
| 0.547563443 | Proliferation/Metastasis |
| 1.20E-05    | Metabolism               |
| 1.00E-09    | Metabolism               |
| 0.000958379 | Metabolism               |
| 0.702743414 | Metabolism               |
| 0.17218975  | TME                      |
| 0.000632206 | TME                      |
| 0.105600965 | TME                      |

|             |                          |
|-------------|--------------------------|
| 0.732225615 | TME                      |
| 0.01367141  | TME                      |
| 0.156471822 | Metabolism               |
| 0.008451523 | Metabolism               |
| 6.11E-05    | Metabolism               |
| 0.192195923 | Metabolism               |
| 0.479873124 | Metabolism               |
| 0.152488713 | TME                      |
| 0.103575691 | TME                      |
| 0.016767916 | TME                      |
| 0.669051982 | TME                      |
| 0.053530637 | TME                      |
| 0.414340157 | TME                      |
| 0.339538002 | TME                      |
| 0.048718322 | TME                      |
| 0.52398803  | TME                      |
| 0.400694646 | Proliferation/Metastasis |
| 0.545242833 | Proliferation/Metastasis |
| 1.16E-10    | Metabolism               |
| 4.17E-10    | Metabolism               |
| 0.752592807 | TME                      |
| 0.970755481 | Metabolism               |
| 0.002043875 | Metabolism               |
| 0.030892374 | TME                      |
| 2.65E-06    | Proliferation/Metastasis |
| 0.02250208  | Proliferation/Metastasis |
| 0.294045717 | TME                      |
| 0.509812639 | Metabolism               |
| 3.95E-09    | Metabolism               |
| 0.409606302 | Proliferation/Metastasis |
| 0.140922722 | Proliferation/Metastasis |
| 0.67050695  | TME                      |
| 0.000404753 | TME                      |
| 0.807426435 | TME                      |
| 0.915420073 | TME                      |
| 0.129791328 | Proliferation/Metastasis |
| 0.932546942 | TME                      |
| 0.00053999  | TME                      |
| 0.321767751 | Metabolism               |
| 0.54611517  | TME                      |
| 0.013185648 | TME                      |
| 0.087908979 | TME                      |
| 0.073763844 | TME                      |

|             |                          |
|-------------|--------------------------|
| 0.001140222 | Metabolism               |
| 0.90250479  | Metabolism               |
| 0.000346717 | Metabolism               |
| 0.984801506 | TME                      |
| 2.83E-05    | Metabolism               |
| 0.129587223 | TME                      |
| 0.200820472 | TME                      |
| 0.396628378 | TME                      |
| 0.042291117 | TME                      |
| 0.006623664 | TME                      |
| 1.39E-10    | Metabolism               |
| 0.485112634 | Proliferation/Metastasis |
| 5.03E-15    | Metabolism               |
| 0.119528867 | Proliferation/Metastasis |
| 9.02E-16    | Metabolism               |
| 0.629850087 | Metabolism               |
| 2.78E-05    | Metabolism               |
| 1.73E-06    | Metabolism               |
| 7.04E-14    | Metabolism               |
| 0.010529453 | Metabolism               |
| 0.329554897 | Metabolism               |
| 0.184397188 | Metabolism               |
| 0.321449628 | Metabolism               |
| 0.303355998 | Metabolism               |
| 3.02E-08    | Metabolism               |
| 0.142856268 | Metabolism               |
| 0.548980924 | Metabolism               |
| 3.23E-07    | Metabolism               |
| 0.006072652 | TME                      |
| 0.001974211 | Proliferation/Metastasis |
| 0.718742508 | Metabolism               |
| 1.91E-08    | Proliferation/Metastasis |
| 0.48855614  | TME                      |
| 9.17E-08    | Proliferation/Metastasis |
| 0.009238009 | Proliferation/Metastasis |
| 0.002569629 | TME                      |
| 5.18E-07    | TME                      |
| 2.77E-12    | Metabolism               |
| 0.001135765 | Metabolism               |
| 8.71E-05    | Proliferation/Metastasis |
| 4.51E-05    | Proliferation/Metastasis |
| 0.053353784 | Proliferation/Metastasis |
| 0.543812335 | Metabolism               |

|             |                          |
|-------------|--------------------------|
| 0.115291639 | Metabolism               |
| 0.010865575 | Metabolism               |
| 0.000830499 | Proliferation/Metastasis |
| 0.000232041 | TME                      |
| 0.000448726 | TME                      |
| 6.97E-14    | Metabolism               |
| 0.007129451 | Proliferation/Metastasis |
| 0.000530656 | Metabolism               |
| 0.773921384 | TME                      |
| 0.050108505 | TME                      |
| 0.533803518 | TME                      |
| 0.251908754 | TME                      |
| 0.042711356 | Metabolism               |
| 4.64E-05    | TME                      |
| 3.03E-11    | Proliferation/Metastasis |
| 2.72E-07    | TME                      |
| 0.00068946  | Proliferation/Metastasis |
| 7.78E-12    | Proliferation/Metastasis |
| 0.000114699 | Metabolism               |
| 0.001328442 | Proliferation/Metastasis |
| 0.13377766  | TME                      |
| 0.571255429 | Metabolism               |
| 0.001348996 | TME                      |
| 0.446225603 | TME                      |
| 0.265878851 | TME                      |
| 0.221145412 | TME                      |
| 0.000324272 | TME                      |
| 0.72863688  | TME                      |
| 1.19E-08    | Metabolism               |
| 2.95E-09    | TME                      |
| 7.48E-05    | Metabolism               |
| 0.534165938 | Metabolism               |
| 0.001344173 | Proliferation/Metastasis |
| 0.853402987 | Proliferation/Metastasis |
| 0.009805073 | Metabolism               |
| 0.000263294 | Metabolism               |
| 8.47E-05    | Metabolism               |
| 1.00E-18    | Metabolism               |
| 8.65E-22    | Proliferation/Metastasis |
| 6.64E-09    | Proliferation/Metastasis |
| 4.84E-06    | Metabolism               |
| 0.96559317  | Metabolism               |
| 3.66E-14    | Metabolism               |

|             |                          |
|-------------|--------------------------|
| 0.772403397 | TME                      |
| 1.51E-06    | Metabolism               |
| 5.01E-08    | Metabolism               |
| 6.33E-11    | Metabolism               |
| 0.000659913 | Metabolism               |
| 2.02E-07    | Proliferation/Metastasis |
| 0.087929172 | Metabolism               |
| 0.730430072 | Metabolism               |
| 0.41196936  | Metabolism               |
| 0.000443477 | Metabolism               |
| 0.000316125 | Metabolism               |
| 6.34E-12    | Metabolism               |
| 0.037806093 | Proliferation/Metastasis |
| 0.215221797 | Metabolism               |
| 1.18E-08    | Metabolism               |
| 0.000749913 | Proliferation/Metastasis |
| 0.001600652 | Metabolism               |
| 0.046127392 | Metabolism               |
| 0.586028822 | Metabolism               |
| 3.10E-13    | Metabolism               |
| 0.000684785 | Metabolism               |
| 0.197426234 | Metabolism               |
| 0.410749345 | Metabolism               |
| 0.109761352 | Metabolism               |
| 0.218553669 | TME                      |
| 0.007568907 | TME                      |
| 0.102143144 | TME                      |
| 0.000343678 | TME                      |
| 0.128096119 | TME                      |
| 0.426577623 | Metabolism               |
| 0.00042392  | Metabolism               |
| 0.184514957 | Proliferation/Metastasis |
| 1.52E-05    | Metabolism               |
| 1.45E-08    | Proliferation/Metastasis |
| 0.002873379 | Metabolism               |
| 0.534413161 | TME                      |
| 0.794226496 | Metabolism               |
| 0.188982    | Metabolism               |
| 1.15E-07    | Metabolism               |
| 0.311854426 | Metabolism               |
| 0.630552834 | TME                      |
| 0.30190398  | TME                      |
| 0.985484967 | Proliferation/Metastasis |



|             |                          |
|-------------|--------------------------|
| 0.000650283 | Metabolism               |
| 3.10E-05    | Proliferation/Metastasis |
| 0.36612753  | Proliferation/Metastasis |
| 0.126297104 | TME                      |
| 0.38310559  | TME                      |
| 0.275614614 | TME                      |
| 0.951385129 | TME                      |
| 0.41327472  | Metabolism               |
| 0.071968943 | Proliferation/Metastasis |
| 0.404397411 | Metabolism               |
| 0.2817824   | Metabolism               |
| 0.40261237  | Proliferation/Metastasis |
| 0.903443853 | Proliferation/Metastasis |
| 0.688470186 | Metabolism               |
| 0.019494325 | Metabolism               |
| 0.483829861 | Metabolism               |
| 0.487770252 | Metabolism               |
| 0.427405683 | TME                      |
| 0.075826299 | TME                      |
| 0.527553605 | TME                      |
| 0.58870196  | TME                      |
| 0.960825494 | TME                      |
| 0.036354695 | Metabolism               |
| 0.176272136 | Metabolism               |
| 0.685360405 | Metabolism               |
| 0.041464101 | Metabolism               |
| 0.877423146 | Metabolism               |
| 0.214520986 | TME                      |
| 0.00973737  | TME                      |
| 0.873349495 | TME                      |
| 0.843080192 | TME                      |
| 0.603361462 | TME                      |
| 0.539909833 | TME                      |
| 0.527367641 | TME                      |
| 0.75883705  | TME                      |
| 0.573298401 | TME                      |
| 0.59873564  | Proliferation/Metastasis |
| 0.025116598 | Proliferation/Metastasis |
| 0.027758685 | Metabolism               |
| 0.005335488 | Metabolism               |
| 0.748131155 | TME                      |
| 0.762039003 | Metabolism               |
| 0.093492733 | Metabolism               |

|             |                          |
|-------------|--------------------------|
| 0.257130022 | TME                      |
| 1.34E-05    | Proliferation/Metastasis |
| 0.00375806  | Proliferation/Metastasis |
| 0.219450717 | TME                      |
| 0.621761875 | Metabolism               |
| 7.46E-05    | Metabolism               |
| 0.191285433 | Proliferation/Metastasis |
| 0.122240094 | Proliferation/Metastasis |
| 0.120321263 | TME                      |
| 0.453119145 | TME                      |
| 0.764088881 | TME                      |
| 0.056688714 | TME                      |
| 0.627033331 | Proliferation/Metastasis |
| 0.76054854  | TME                      |
| 0.262266228 | TME                      |
| 0.25343321  | Metabolism               |
| 0.133928921 | TME                      |
| 0.573347959 | TME                      |
| 0.335272805 | TME                      |
| 0.008727854 | TME                      |
| 0.27396751  | Metabolism               |
| 0.568430058 | Metabolism               |
| 0.487332657 | Metabolism               |
| 0.167383334 | TME                      |
| 0.000267766 | Metabolism               |
| 0.599423063 | TME                      |
| 0.337303119 | TME                      |
| 0.313795088 | TME                      |
| 0.123852559 | TME                      |
| 0.852053727 | TME                      |
| 0.491005036 | Metabolism               |
| 0.873120738 | Proliferation/Metastasis |
| 0.162780313 | Metabolism               |
| 0.20926482  | Proliferation/Metastasis |
| 0.009686538 | Metabolism               |
| 0.77615568  | Metabolism               |
| 0.05075278  | Metabolism               |
| 0.001432951 | Metabolism               |
| 0.189003549 | Metabolism               |
| 0.024080971 | Metabolism               |
| 0.102136759 | Metabolism               |
| 0.230880189 | Metabolism               |
| 0.345933169 | Metabolism               |

|             |                          |
|-------------|--------------------------|
| 0.033620697 | Metabolism               |
| 0.719678905 | Metabolism               |
| 0.111028044 | Metabolism               |
| 0.00220505  | Metabolism               |
| 0.000299258 | Metabolism               |
| 0.110830374 | TME                      |
| 0.177396518 | Proliferation/Metastasis |
| 0.51788263  | Metabolism               |
| 0.89152942  | Proliferation/Metastasis |
| 0.73677801  | TME                      |
| 0.675090186 | Proliferation/Metastasis |
| 0.079452027 | Proliferation/Metastasis |
| 0.235402233 | TME                      |
| 0.672357372 | TME                      |
| 7.10E-07    | Metabolism               |
| 1.56E-07    | Metabolism               |
| 0.304670368 | Proliferation/Metastasis |
| 0.106549095 | Proliferation/Metastasis |
| 0.017882633 | Proliferation/Metastasis |
| 0.942084858 | Metabolism               |
| 0.595934556 | Metabolism               |
| 0.705011842 | Metabolism               |
| 0.238892884 | Proliferation/Metastasis |
| 0.446183332 | TME                      |
| 0.58044969  | TME                      |
| 0.09106572  | Metabolism               |
| 0.005012567 | Proliferation/Metastasis |
| 1.37E-09    | Metabolism               |
| 0.018173571 | TME                      |
| 0.707396653 | TME                      |
| 0.913733078 | TME                      |
| 0.004554549 | TME                      |
| 0.262130391 | Metabolism               |
| 0.095591196 | TME                      |
| 1.19E-06    | Proliferation/Metastasis |
| 0.99092138  | TME                      |
| 1.17E-06    | Proliferation/Metastasis |
| 0.303210039 | Proliferation/Metastasis |
| 0.000428223 | Metabolism               |
| 0.018438344 | Proliferation/Metastasis |
| 0.131748579 | TME                      |
| 0.080911732 | Metabolism               |
| 0.069119436 | TME                      |

|             |                          |
|-------------|--------------------------|
| 0.026972776 | TME                      |
| 0.090622338 | TME                      |
| 0.758827408 | TME                      |
| 0.386033096 | TME                      |
| 0.191436046 | TME                      |
| 0.3024823   | Metabolism               |
| 0.478112746 | TME                      |
| 0.913972117 | Metabolism               |
| 0.034886151 | Metabolism               |
| 0.024775813 | Proliferation/Metastasis |
| 0.430340975 | Proliferation/Metastasis |
| 0.899420494 | Metabolism               |
| 0.953675141 | Metabolism               |
| 0.223821597 | Metabolism               |
| 6.60E-06    | Metabolism               |
| 0.026388934 | Proliferation/Metastasis |
| 0.618716014 | Proliferation/Metastasis |
| 0.296227316 | Metabolism               |
| 0.684514247 | Metabolism               |
| 0.023879949 | Metabolism               |
| 0.785830529 | TME                      |
| 0.004879439 | Metabolism               |
| 0.000219288 | Metabolism               |
| 0.12810032  | Metabolism               |
| 0.077492534 | Metabolism               |
| 0.755201618 | Proliferation/Metastasis |
| 0.003382414 | Metabolism               |
| 0.264647762 | Metabolism               |
| 0.384237728 | Metabolism               |
| 0.003172171 | Metabolism               |
| 0.007042057 | Metabolism               |
| 0.000821979 | Metabolism               |
| 0.446374587 | Proliferation/Metastasis |
| 0.791391171 | Metabolism               |
| 0.005505795 | Metabolism               |
| 0.093311062 | Proliferation/Metastasis |
| 0.566512443 | Metabolism               |
| 0.119804051 | Metabolism               |
| 0.610708444 | Metabolism               |
| 0.170109066 | Metabolism               |
| 0.484957288 | Metabolism               |
| 0.529691164 | Metabolism               |
| 0.312367698 | Metabolism               |

|             |                          |
|-------------|--------------------------|
| 0.002456158 | Metabolism               |
| 0.43960807  | TME                      |
| 0.94340204  | TME                      |
| 0.35954732  | TME                      |
| 0.594442727 | TME                      |
| 0.524543579 | TME                      |
| 0.005852019 | Metabolism               |
| 0.115738322 | Metabolism               |
| 0.212024761 | Proliferation/Metastasis |
| 6.35E-06    | Metabolism               |
| 0.759135982 | Proliferation/Metastasis |
| 0.005446592 | Metabolism               |
| 0.389574754 | TME                      |
| 0.202786061 | Metabolism               |
| 0.086703331 | Metabolism               |
| 0.000317981 | Metabolism               |
| 0.023212376 | Metabolism               |
| 0.588990877 | TME                      |
| 0.060112638 | TME                      |
| 0.022284639 | Proliferation/Metastasis |
| 0.093750275 | Metabolism               |
| 0.000534614 | Proliferation/Metastasis |
| 0.665806272 | Proliferation/Metastasis |
| 0.022219923 | TME                      |
| 0.000681697 | TME                      |
| 3.98E-07    | TME                      |
| 5.54E-07    | TME                      |
| 1.14E-18    | Metabolism               |
| 0.01765749  | Proliferation/Metastasis |
| 0.738814644 | Metabolism               |
| 1.04E-11    | Metabolism               |
| 0.063699448 | Proliferation/Metastasis |
| 1.81E-06    | Proliferation/Metastasis |
| 0.481551217 | Metabolism               |
| 2.87E-19    | Metabolism               |
| 1.13E-14    | Metabolism               |
| 5.75E-06    | Metabolism               |
| 6.31E-13    | TME                      |
| 0.092851534 | TME                      |
| 1.54E-05    | TME                      |
| 5.60E-08    | TME                      |
| 0.006784454 | TME                      |
| 9.62E-05    | Metabolism               |

|             |                          |
|-------------|--------------------------|
| 0.010953113 | Metabolism               |
| 0.002549319 | Metabolism               |
| 1.66E-07    | Metabolism               |
| 0.001402756 | Metabolism               |
| 0.000494707 | TME                      |
| 0.090252816 | TME                      |
| 0.000161013 | TME                      |
| 3.49E-08    | TME                      |
| 0.000657242 | TME                      |
| 2.73E-07    | TME                      |
| 5.43E-07    | TME                      |
| 6.05E-05    | TME                      |
| 1.70E-07    | TME                      |
| 0.000254849 | Proliferation/Metastasis |
| 0.210737835 | Proliferation/Metastasis |
| 2.64E-12    | Metabolism               |
| 9.72E-18    | Metabolism               |
| 1.88E-08    | TME                      |
| 0.002165768 | Metabolism               |
| 2.14E-05    | Metabolism               |
| 0.000886127 | TME                      |
| 6.83E-06    | Proliferation/Metastasis |
| 0.000771419 | Proliferation/Metastasis |
| 7.18E-08    | TME                      |
| 0.114629189 | Metabolism               |
| 3.67E-14    | Metabolism               |
| 0.00011193  | Proliferation/Metastasis |
| 0.042792059 | Proliferation/Metastasis |
| 2.58E-07    | TME                      |
| 0.004591509 | TME                      |
| 6.82E-07    | TME                      |
| 1.53E-06    | TME                      |
| 0.95465427  | Proliferation/Metastasis |
| 0.006723105 | TME                      |
| 0.005669926 | TME                      |
| 0.011640372 | Metabolism               |
| 4.85E-06    | TME                      |
| 0.002882056 | TME                      |
| 9.95E-05    | TME                      |
| 0.012907706 | TME                      |
| 0.311539717 | Metabolism               |
| 0.907178604 | Metabolism               |
| 0.698848723 | Metabolism               |

|             |                          |
|-------------|--------------------------|
| 0.737406031 | TME                      |
| 0.002701857 | Metabolism               |
| 1.71E-06    | TME                      |
| 6.23E-08    | TME                      |
| 2.21E-08    | TME                      |
| 4.50E-05    | TME                      |
| 0.006065756 | TME                      |
| 2.59E-08    | Metabolism               |
| 0.000231635 | Proliferation/Metastasis |
| 5.11E-14    | Metabolism               |
| 0.024861192 | Proliferation/Metastasis |
| 8.81E-17    | Metabolism               |
| 0.604085487 | Metabolism               |
| 0.752986615 | Metabolism               |
| 5.40E-17    | Metabolism               |
| 3.33E-19    | Metabolism               |
| 5.12E-06    | Metabolism               |
| 0.000206101 | Metabolism               |
| 0.757689353 | Metabolism               |
| 0.833458281 | Metabolism               |
| 1.50E-08    | Metabolism               |
| 6.26E-05    | Metabolism               |
| 5.38E-05    | Metabolism               |
| 0.012368769 | Metabolism               |
| 4.68E-12    | Metabolism               |
| 0.030744071 | TME                      |
| 0.007137341 | Proliferation/Metastasis |
| 0.132288496 | Metabolism               |
| 3.58E-13    | Proliferation/Metastasis |
| 7.31E-08    | TME                      |
| 0.249608892 | Proliferation/Metastasis |
| 0.037701107 | Proliferation/Metastasis |
| 5.66E-05    | TME                      |
| 0.758429654 | TME                      |
| 6.91E-10    | Metabolism               |
| 1.27E-09    | Metabolism               |
| 3.17E-22    | Proliferation/Metastasis |
| 2.03E-06    | Proliferation/Metastasis |
| 0.127292508 | Proliferation/Metastasis |
| 0.014520442 | Metabolism               |
| 0.116312192 | Metabolism               |
| 0.105469045 | Metabolism               |
| 0.014817912 | Proliferation/Metastasis |

|             |                          |
|-------------|--------------------------|
| 0.042727371 | TME                      |
| 0.727186039 | TME                      |
| 2.54E-05    | Metabolism               |
| 0.0028201   | Proliferation/Metastasis |
| 2.53E-09    | Metabolism               |
| 3.57E-08    | TME                      |
| 2.87E-06    | TME                      |
| 0.003430281 | TME                      |
| 0.565018522 | TME                      |
| 0.01093723  | Metabolism               |
| 9.67E-05    | TME                      |
| 0.014912927 | Proliferation/Metastasis |
| 0.451300623 | TME                      |
| 5.36E-11    | Proliferation/Metastasis |
| 3.84E-12    | Proliferation/Metastasis |
| 0.114052674 | Metabolism               |
| 1.48E-06    | Proliferation/Metastasis |
| 0.000100657 | TME                      |
| 0.030395368 | Metabolism               |
| 0.357823061 | TME                      |
| 2.43E-07    | TME                      |
| 6.10E-06    | TME                      |
| 1.72E-06    | TME                      |
| 0.141711648 | TME                      |
| 7.31E-09    | TME                      |
| 2.19E-07    | Metabolism               |
| 0.96886322  | TME                      |
| 0.488704122 | Metabolism               |
| 0.002385429 | Metabolism               |
| 0.039938571 | Proliferation/Metastasis |
| 1.81E-06    | Proliferation/Metastasis |
| 1.78E-08    | Metabolism               |
| 0.819609899 | Metabolism               |
| 0.236507992 | Metabolism               |
| 5.26E-06    | Metabolism               |
| 7.83E-09    | Proliferation/Metastasis |
| 2.88E-15    | Proliferation/Metastasis |
| 0.66920233  | Metabolism               |
| 0.002032511 | Metabolism               |
| 1.30E-12    | Metabolism               |
| 0.010649578 | TME                      |
| 0.005886891 | Metabolism               |
| 3.33E-08    | Metabolism               |



|             |                          |
|-------------|--------------------------|
| 1.06E-06    | Metabolism               |
| 0.743293999 | Metabolism               |
| 0.000605219 | Proliferation/Metastasis |
| 0.001366916 | Metabolism               |
| 0.602001102 | Metabolism               |
| 0.98035094  | Metabolism               |
| 2.28E-12    | Metabolism               |
| 1.59E-06    | Metabolism               |
| 4.04E-16    | Metabolism               |
| 0.002547961 | Proliferation/Metastasis |
| 0.937326897 | Metabolism               |
| 0.404495736 | Metabolism               |
| 4.23E-06    | Proliferation/Metastasis |
| 0.043392014 | Metabolism               |
| 0.000477131 | Metabolism               |
| 0.876520074 | Metabolism               |
| 0.001120913 | Metabolism               |
| 0.844435926 | Metabolism               |
| 0.024467817 | Metabolism               |
| 0.002999282 | Metabolism               |
| 1.86E-06    | Metabolism               |
| 2.14E-06    | TME                      |
| 0.000582883 | TME                      |
| 1.06E-05    | TME                      |
| 0.074069591 | TME                      |
| 0.000772016 | TME                      |
| 0.432560497 | Metabolism               |
| 0.002457263 | Metabolism               |
| 0.000198694 | Proliferation/Metastasis |
| 0.055876257 | Metabolism               |
| 0.257855001 | Proliferation/Metastasis |
| 0.072526294 | Metabolism               |
| 0.075413101 | TME                      |
| 0.899001923 | Metabolism               |
| 0.644208287 | Metabolism               |
| 8.74E-15    | Metabolism               |
| 2.62E-05    | Metabolism               |
| 0.640261349 | TME                      |
| 0.786671947 | TME                      |
| 0.007645949 | Proliferation/Metastasis |
| 6.97E-05    | Metabolism               |
| 1.31E-18    | Proliferation/Metastasis |
| 1.18E-07    | Proliferation/Metastasis |

|             |                          |
|-------------|--------------------------|
| 5.56E-06    | TME                      |
| 0.126871153 | TME                      |
| 0.002644424 | TME                      |
| 0.008694609 | TME                      |
| 2.86E-08    | Metabolism               |
| 0.003661073 | Proliferation/Metastasis |
| 0.708100432 | Metabolism               |
| 4.07E-06    | Metabolism               |
| 0.102044921 | Proliferation/Metastasis |
| 0.778779883 | Proliferation/Metastasis |
| 0.877248158 | Metabolism               |
| 5.45E-09    | Metabolism               |
| 0.000949451 | Metabolism               |
| 0.410777524 | Metabolism               |
| 0.001941505 | TME                      |
| 0.001918959 | TME                      |
| 0.001208606 | TME                      |
| 0.003675293 | TME                      |
| 0.750191018 | TME                      |
| 0.543221688 | Metabolism               |
| 0.765885198 | Metabolism               |
| 0.088773262 | Metabolism               |
| 0.024239023 | Metabolism               |
| 0.147362563 | Metabolism               |
| 0.012228951 | TME                      |
| 7.31E-10    | TME                      |
| 0.010723142 | TME                      |
| 0.021051869 | TME                      |
| 0.006731908 | TME                      |
| 0.003437668 | TME                      |
| 0.003585027 | TME                      |
| 0.124299462 | TME                      |
| 0.012035232 | TME                      |
| 0.006098595 | Proliferation/Metastasis |
| 0.326549746 | Proliferation/Metastasis |
| 8.47E-09    | Metabolism               |
| 2.51E-11    | Metabolism               |
| 1.12E-05    | TME                      |
| 0.660253411 | Metabolism               |
| 0.043479374 | Metabolism               |
| 0.000329001 | TME                      |
| 1.04E-11    | Proliferation/Metastasis |
| 2.43E-05    | Proliferation/Metastasis |

|             |                          |
|-------------|--------------------------|
| 0.503959029 | TME                      |
| 0.904968608 | Metabolism               |
| 1.64E-10    | Metabolism               |
| 0.00324371  | Proliferation/Metastasis |
| 0.006988448 | Proliferation/Metastasis |
| 0.001199505 | TME                      |
| 0.013389113 | TME                      |
| 0.00101026  | TME                      |
| 6.06E-07    | TME                      |
| 0.08162455  | Proliferation/Metastasis |
| 0.004674234 | TME                      |
| 0.018378038 | TME                      |
| 0.011707644 | Metabolism               |
| 9.43E-07    | TME                      |
| 0.001658508 | TME                      |
| 0.150942198 | TME                      |
| 0.185928283 | TME                      |
| 0.032122012 | Metabolism               |
| 0.327556175 | Metabolism               |
| 0.057045263 | Metabolism               |
| 4.05E-05    | TME                      |
| 0.001246836 | Metabolism               |
| 0.004038186 | TME                      |
| 0.043419511 | TME                      |
| 0.002644215 | TME                      |
| 0.827197041 | TME                      |
| 0.17167672  | TME                      |
| 7.79E-06    | Metabolism               |
| 0.136536072 | Proliferation/Metastasis |
| 6.53E-07    | Metabolism               |
| 0.008697831 | Proliferation/Metastasis |
| 2.65E-09    | Metabolism               |
| 0.084894026 | Metabolism               |
| 0.03123206  | Metabolism               |
| 1.19E-08    | Metabolism               |
| 1.28E-07    | Metabolism               |
| 0.226714654 | Metabolism               |
| 0.463584108 | Metabolism               |
| 0.076552759 | Metabolism               |
| 0.001548069 | Metabolism               |
| 4.68E-08    | Metabolism               |
| 0.245132964 | Metabolism               |
| 0.536878629 | Metabolism               |

|             |                          |
|-------------|--------------------------|
| 0.03517496  | Metabolism               |
| 2.14E-09    | Metabolism               |
| 0.000718354 | TME                      |
| 0.003434234 | Proliferation/Metastasis |
| 0.105231744 | Metabolism               |
| 0.00873061  | Proliferation/Metastasis |
| 0.00990211  | TME                      |
| 0.123051069 | Proliferation/Metastasis |
| 0.000229787 | Proliferation/Metastasis |
| 0.016222387 | TME                      |
| 0.378744008 | TME                      |
| 4.71E-10    | Metabolism               |
| 1.14E-10    | Metabolism               |
| 8.66E-05    | Proliferation/Metastasis |
| 7.90E-08    | Proliferation/Metastasis |
| 2.60E-06    | Proliferation/Metastasis |
| 0.199203409 | Metabolism               |
| 0.071794455 | Metabolism               |
| 0.885457936 | Metabolism               |
| 0.009627461 | Proliferation/Metastasis |
| 0.011894669 | TME                      |
| 0.036471662 | TME                      |
| 0.012504142 | Metabolism               |
| 0.052759318 | Proliferation/Metastasis |
| 4.44E-09    | Metabolism               |
| 5.63E-05    | TME                      |
| 0.100758452 | TME                      |
| 0.045415625 | TME                      |
| 6.16E-06    | TME                      |
| 0.201546119 | Metabolism               |
| 1.37E-05    | TME                      |
| 4.00E-06    | Proliferation/Metastasis |
| 0.069530866 | TME                      |
| 4.12E-05    | Proliferation/Metastasis |
| 1.36E-07    | Proliferation/Metastasis |
| 1.70E-06    | Metabolism               |
| 6.42E-09    | Proliferation/Metastasis |
| 0.00015914  | TME                      |
| 0.042699116 | Metabolism               |
| 0.363628813 | TME                      |
| 9.10E-09    | TME                      |
| 1.63E-07    | TME                      |
| 0.002939408 | TME                      |

|             |                          |
|-------------|--------------------------|
| 0.557189714 | TME                      |
| 3.74E-05    | TME                      |
| 0.017417134 | Metabolism               |
| 0.116382782 | TME                      |
| 0.09871322  | Metabolism               |
| 0.590373362 | Metabolism               |
| 0.006644124 | Proliferation/Metastasis |
| 0.74617239  | Proliferation/Metastasis |
| 0.000698822 | Metabolism               |
| 0.181149767 | Metabolism               |
| 0.056690162 | Metabolism               |
| 1.09E-14    | Metabolism               |
| 1.04E-05    | Proliferation/Metastasis |
| 0.002800308 | Proliferation/Metastasis |
| 0.993959276 | Metabolism               |
| 0.265137794 | Metabolism               |
| 4.74E-10    | Metabolism               |
| 0.021662031 | TME                      |
| 0.016347709 | Metabolism               |
| 1.59E-06    | Metabolism               |
| 0.000166322 | Metabolism               |
| 0.005410265 | Metabolism               |
| 0.063503125 | Proliferation/Metastasis |
| 0.009493088 | Metabolism               |
| 0.179723842 | Metabolism               |
| 0.868500447 | Metabolism               |
| 2.00E-10    | Metabolism               |
| 1.11E-08    | Metabolism               |
| 1.50E-10    | Metabolism               |
| 0.179810696 | Proliferation/Metastasis |
| 0.203228233 | Metabolism               |
| 0.010306269 | Metabolism               |
| 1.10E-09    | Proliferation/Metastasis |
| 0.037603712 | Metabolism               |
| 0.25767587  | Metabolism               |
| 0.008179423 | Metabolism               |
| 1.75E-05    | Metabolism               |
| 0.529784265 | Metabolism               |
| 0.926842667 | Metabolism               |
| 0.347859143 | Metabolism               |
| 0.054928927 | Metabolism               |
| 0.000366913 | TME                      |
| 0.010006164 | TME                      |

|             |                          |
|-------------|--------------------------|
| 0.001034808 | TME                      |
| 0.056648104 | TME                      |
| 0.007960667 | TME                      |
| 0.464680305 | Metabolism               |
| 0.000381539 | Metabolism               |
| 0.035707609 | Proliferation/Metastasis |
| 2.27E-06    | Metabolism               |
| 0.16639808  | Proliferation/Metastasis |
| 0.762739955 | Metabolism               |
| 0.061163083 | TME                      |
| 0.206898542 | Metabolism               |
| 0.012997685 | Metabolism               |
| 9.05E-05    | Metabolism               |
| 0.07470956  | Metabolism               |
| 0.016270749 | TME                      |
| 0.029239211 | TME                      |
| 0.000210048 | Proliferation/Metastasis |
| 0.000205932 | Metabolism               |
| 3.80E-06    | Proliferation/Metastasis |
| 0.439749385 | Proliferation/Metastasis |
| 1.74E-25    | TME                      |
| 0.000246466 | TME                      |
| 0.00289984  | TME                      |
| 0.005653252 | TME                      |
| 4.81E-09    | Metabolism               |
| 6.97E-15    | Proliferation/Metastasis |
| 0.007778016 | Metabolism               |
| 3.45E-14    | Metabolism               |
| 0.302532738 | Proliferation/Metastasis |
| 5.69E-10    | Proliferation/Metastasis |
| 0.221964268 | Metabolism               |
| 5.90E-06    | Metabolism               |
| 0.100376397 | Metabolism               |
| 1.45E-09    | Metabolism               |
| 0.432800482 | TME                      |
| 0.43486748  | TME                      |
| 0.068101265 | TME                      |
| 0.001121132 | TME                      |
| 1.60E-05    | TME                      |
| 0.000649167 | Metabolism               |
| 0.284361519 | Metabolism               |
| 0.000110993 | Metabolism               |
| 0.007759526 | Metabolism               |

|             |                          |
|-------------|--------------------------|
| 5.19E-05    | Metabolism               |
| 1.87E-06    | TME                      |
| 1.22E-08    | TME                      |
| 0.042008902 | TME                      |
| 0.000320899 | TME                      |
| 0.005863796 | TME                      |
| 0.005083826 | TME                      |
| 0.002625594 | TME                      |
| 1.64E-05    | TME                      |
| 0.000617839 | TME                      |
| 1.28E-11    | Proliferation/Metastasis |
| 5.18E-11    | Proliferation/Metastasis |
| 2.53E-15    | Metabolism               |
| 2.58E-20    | Metabolism               |
| 0.147944314 | TME                      |
| 0.027678636 | Metabolism               |
| 1.50E-14    | Metabolism               |
| 0.259343086 | TME                      |
| 8.94E-28    | Proliferation/Metastasis |
| 6.49E-20    | Proliferation/Metastasis |
| 0.000286065 | TME                      |
| 1.22E-10    | Metabolism               |
| 0.077411112 | Metabolism               |
| 3.59E-13    | Proliferation/Metastasis |
| 4.96E-20    | Proliferation/Metastasis |
| 0.000162975 | TME                      |
| 0.001070681 | TME                      |
| 0.039597999 | TME                      |
| 0.70469165  | TME                      |
| 8.09E-31    | Proliferation/Metastasis |
| 7.86E-12    | TME                      |
| 0.000193388 | TME                      |
| 0.002182191 | Metabolism               |
| 0.754867979 | TME                      |
| 0.099770664 | TME                      |
| 0.000129111 | TME                      |
| 0.417010653 | TME                      |
| 3.99E-24    | Metabolism               |
| 0.006510028 | Metabolism               |
| 5.12E-07    | Metabolism               |
| 5.59E-11    | TME                      |
| 7.19E-06    | Metabolism               |
| 0.010379199 | TME                      |

|             |                          |
|-------------|--------------------------|
| 0.000205951 | TME                      |
| 0.007587212 | TME                      |
| 1.02E-05    | TME                      |
| 1.06E-06    | TME                      |
| 7.45E-10    | Metabolism               |
| 1.15E-06    | Proliferation/Metastasis |
| 8.58E-09    | Metabolism               |
| 2.30E-17    | Proliferation/Metastasis |
| 5.96E-06    | Metabolism               |
| 1.21E-07    | Metabolism               |
| 0.165979614 | Metabolism               |
| 3.12E-08    | Metabolism               |
| 6.98E-11    | Metabolism               |
| 6.23E-05    | Metabolism               |
| 3.17E-18    | Metabolism               |
| 9.42E-06    | Metabolism               |
| 5.57E-11    | Metabolism               |
| 3.92E-05    | Metabolism               |
| 0.558141268 | Metabolism               |
| 3.72E-05    | Metabolism               |
| 3.75E-07    | Metabolism               |
| 6.74E-07    | Metabolism               |
| 0.186680908 | TME                      |
| 4.48E-18    | Proliferation/Metastasis |
| 3.07E-12    | Metabolism               |
| 0.580323317 | Proliferation/Metastasis |
| 0.000423728 | TME                      |
| 0.069242038 | Proliferation/Metastasis |
| 0.673736206 | Proliferation/Metastasis |
| 6.19E-05    | TME                      |
| 0.062438784 | TME                      |
| 3.06E-05    | Metabolism               |
| 0.723007376 | Metabolism               |
| 0.006019772 | Proliferation/Metastasis |
| 4.48E-23    | Proliferation/Metastasis |
| 0.002250197 | Proliferation/Metastasis |
| 0.00021404  | Metabolism               |
| 2.23E-13    | Metabolism               |
| 0.010799012 | Metabolism               |
| 0.511382839 | Proliferation/Metastasis |
| 0.001274101 | TME                      |
| 0.640039119 | TME                      |
| 3.66E-17    | Metabolism               |



|             |                          |
|-------------|--------------------------|
| 0.025934803 | Proliferation/Metastasis |
| 0.726358626 | Metabolism               |
| 0.174324623 | TME                      |
| 4.11E-05    | TME                      |
| 3.25E-09    | TME                      |
| 0.219713919 | TME                      |
| 7.08E-06    | Metabolism               |
| 0.000516399 | TME                      |
| 0.005164714 | Proliferation/Metastasis |
| 0.016058388 | TME                      |
| 0.463903189 | Proliferation/Metastasis |
| 3.28E-33    | Proliferation/Metastasis |
| 8.57E-17    | Metabolism               |
| 7.06E-30    | Proliferation/Metastasis |
| 0.118910754 | TME                      |
| 0.064630142 | Metabolism               |
| 0.000645939 | TME                      |
| 0.159533154 | TME                      |
| 0.041430625 | TME                      |
| 0.01865572  | TME                      |
| 1.57E-17    | TME                      |
| 0.128564007 | TME                      |
| 5.44E-13    | Metabolism               |
| 0.005239246 | TME                      |
| 0.00134392  | Metabolism               |
| 0.000808933 | Metabolism               |
| 0.001232707 | Proliferation/Metastasis |
| 5.31E-12    | Proliferation/Metastasis |
| 4.33E-14    | Metabolism               |
| 0.004934124 | Metabolism               |
| 1.35E-21    | Metabolism               |
| 7.28E-26    | Metabolism               |
| 1.40E-08    | Proliferation/Metastasis |
| 1.28E-07    | Proliferation/Metastasis |
| 0.056637102 | Metabolism               |
| 0.000827384 | Metabolism               |
| 5.00E-20    | Metabolism               |
| 1.77E-10    | TME                      |
| 0.19603901  | Metabolism               |
| 3.17E-08    | Metabolism               |
| 0.000317346 | Metabolism               |
| 4.05E-22    | Metabolism               |
| 4.76E-06    | Proliferation/Metastasis |

|             |                          |
|-------------|--------------------------|
| 0.491963487 | Metabolism               |
| 6.94E-07    | Metabolism               |
| 0.696752289 | Metabolism               |
| 2.91E-12    | Metabolism               |
| 4.36E-29    | Metabolism               |
| 5.24E-09    | Metabolism               |
| 1.82E-18    | Proliferation/Metastasis |
| 2.15E-17    | Metabolism               |
| 1.98E-06    | Metabolism               |
| 1.82E-06    | Proliferation/Metastasis |
| 1.75E-27    | Metabolism               |
| 0.002005205 | Metabolism               |
| 8.17E-08    | Metabolism               |
| 6.94E-31    | Metabolism               |
| 0.006465599 | Metabolism               |
| 2.11E-08    | Metabolism               |
| 4.81E-06    | Metabolism               |
| 0.000196375 | Metabolism               |
| 0.04993662  | TME                      |
| 0.015546601 | TME                      |
| 0.091524517 | TME                      |
| 0.031074902 | TME                      |
| 0.203259692 | TME                      |
| 2.19E-10    | Metabolism               |
| 6.80E-10    | Metabolism               |
| 5.44E-14    | Proliferation/Metastasis |
| 4.10E-06    | Metabolism               |
| 0.045821809 | Proliferation/Metastasis |
| 0.03232368  | Metabolism               |
| 0.000455518 | TME                      |
| 9.88E-07    | Metabolism               |
| 0.000473566 | Metabolism               |
| 0.501830604 | Metabolism               |
| 0.098530721 | Metabolism               |
| 4.19E-09    | TME                      |
| 4.02E-09    | TME                      |
| 5.27E-08    | Proliferation/Metastasis |
| 3.87E-08    | Metabolism               |
| 0.18303924  | Proliferation/Metastasis |
| 0.000746755 | Proliferation/Metastasis |
| 3.30E-07    | TME                      |
| 0.005138157 | TME                      |
| 0.012112604 | TME                      |

|             |                          |
|-------------|--------------------------|
| 0.006572378 | TME                      |
| 0.072680962 | Metabolism               |
| 1.83E-07    | Proliferation/Metastasis |
| 0.941393197 | Metabolism               |
| 4.02E-05    | Metabolism               |
| 0.038503993 | Proliferation/Metastasis |
| 8.61E-05    | Proliferation/Metastasis |
| 0.856140458 | Metabolism               |
| 0.132005751 | Metabolism               |
| 0.840982998 | Metabolism               |
| 0.001414004 | Metabolism               |
| 0.197711566 | TME                      |
| 0.382827385 | TME                      |
| 0.123228092 | TME                      |
| 0.012002908 | TME                      |
| 0.077467811 | TME                      |
| 0.025358545 | Metabolism               |
| 0.5114107   | Metabolism               |
| 0.110085959 | Metabolism               |
| 0.001760893 | Metabolism               |
| 0.098574153 | Metabolism               |
| 0.000171566 | TME                      |
| 0.005209489 | TME                      |
| 0.060432616 | TME                      |
| 0.006314425 | TME                      |
| 0.020931699 | TME                      |
| 0.020290545 | TME                      |
| 0.014079184 | TME                      |
| 0.00116142  | TME                      |
| 0.001201259 | TME                      |
| 0.016727848 | Proliferation/Metastasis |
| 0.022739498 | Proliferation/Metastasis |
| 0.000984462 | Metabolism               |
| 0.000569772 | Metabolism               |
| 0.980540112 | TME                      |
| 0.028883314 | Metabolism               |
| 0.001198579 | Metabolism               |
| 0.165880561 | TME                      |
| 2.40E-08    | Proliferation/Metastasis |
| 1.44E-06    | Proliferation/Metastasis |
| 0.004138753 | TME                      |
| 0.000191378 | Metabolism               |
| 0.569553381 | Metabolism               |

|             |                          |
|-------------|--------------------------|
| 0.001025268 | Proliferation/Metastasis |
| 2.91E-08    | Proliferation/Metastasis |
| 0.00982505  | TME                      |
| 0.016442074 | TME                      |
| 0.051223622 | TME                      |
| 0.476603477 | TME                      |
| 3.39E-08    | Proliferation/Metastasis |
| 7.10E-06    | TME                      |
| 0.001381659 | TME                      |
| 0.841779147 | Metabolism               |
| 0.589666821 | TME                      |
| 0.101522788 | TME                      |
| 0.001085508 | TME                      |
| 0.081064011 | TME                      |
| 9.64E-06    | Metabolism               |
| 0.647022739 | Metabolism               |
| 2.29E-05    | Metabolism               |
| 1.78E-06    | TME                      |
| 0.057697519 | Metabolism               |
| 0.024572926 | TME                      |
| 0.0003229   | TME                      |
| 0.008031406 | TME                      |
| 0.000194447 | TME                      |
| 0.000254148 | TME                      |
| 0.001865482 | Metabolism               |
| 0.057148805 | Proliferation/Metastasis |
| 0.026587763 | Metabolism               |
| 1.39E-07    | Proliferation/Metastasis |
| 0.113588734 | Metabolism               |
| 0.008726634 | Metabolism               |
| 0.280963927 | Metabolism               |
| 0.229443686 | Metabolism               |
| 0.021662163 | Metabolism               |
| 0.002799875 | Metabolism               |
| 6.92E-08    | Metabolism               |
| 0.046361945 | Metabolism               |
| 0.001332094 | Metabolism               |
| 0.176392628 | Metabolism               |
| 0.867736307 | Metabolism               |
| 0.000556273 | Metabolism               |
| 0.00968396  | Metabolism               |
| 0.030880158 | Metabolism               |
| 0.081076085 | TME                      |

|             |                          |
|-------------|--------------------------|
| 1.11E-09    | Proliferation/Metastasis |
| 0.000293232 | Metabolism               |
| 0.54943571  | Proliferation/Metastasis |
| 0.004290431 | TME                      |
| 0.049506486 | Proliferation/Metastasis |
| 0.15455312  | Proliferation/Metastasis |
| 0.000763317 | TME                      |
| 0.129274156 | TME                      |
| 0.410639193 | Metabolism               |
| 0.134868814 | Metabolism               |
| 0.93794414  | Proliferation/Metastasis |
| 1.92E-08    | Proliferation/Metastasis |
| 0.190473882 | Proliferation/Metastasis |
| 0.274919832 | Metabolism               |
| 5.08E-05    | Metabolism               |
| 0.088217604 | Metabolism               |
| 0.12266369  | Proliferation/Metastasis |
| 0.011703875 | TME                      |
| 0.43910547  | TME                      |
| 2.65E-05    | Metabolism               |
| 0.423300728 | Proliferation/Metastasis |
| 0.031541281 | Metabolism               |
| 0.214786344 | TME                      |
| 0.000778968 | TME                      |
| 3.14E-06    | TME                      |
| 0.034945172 | TME                      |
| 0.004130929 | Metabolism               |
| 0.534602464 | TME                      |
| 0.174024023 | Proliferation/Metastasis |
| 0.025717193 | TME                      |
| 0.396830175 | Proliferation/Metastasis |
| 3.52E-08    | Proliferation/Metastasis |
| 8.73E-06    | Metabolism               |
| 4.19E-08    | Proliferation/Metastasis |
| 0.060379459 | TME                      |
| 0.047067033 | Metabolism               |
| 0.068251425 | TME                      |
| 0.531392067 | TME                      |
| 0.252110814 | TME                      |
| 0.010281097 | TME                      |
| 3.73E-08    | TME                      |
| 0.095648377 | TME                      |
| 0.001012349 | Metabolism               |

|             |                          |
|-------------|--------------------------|
| 0.002940697 | TME                      |
| 0.143824522 | Metabolism               |
| 0.009636918 | Metabolism               |
| 0.000365159 | Proliferation/Metastasis |
| 1.69E-05    | Proliferation/Metastasis |
| 0.000700393 | Metabolism               |
| 0.479925451 | Metabolism               |
| 2.39E-08    | Metabolism               |
| 3.13E-07    | Metabolism               |
| 2.59E-05    | Proliferation/Metastasis |
| 0.01247059  | Proliferation/Metastasis |
| 0.025816482 | Metabolism               |
| 0.264532247 | Metabolism               |
| 0.000299689 | Metabolism               |
| 1.55E-06    | TME                      |
| 0.588087749 | Metabolism               |
| 0.131027585 | Metabolism               |
| 0.059131742 | Metabolism               |
| 2.05E-05    | Metabolism               |
| 2.01E-06    | Proliferation/Metastasis |
| 0.923865153 | Metabolism               |
| 0.000215367 | Metabolism               |
| 0.900992646 | Metabolism               |
| 0.025284345 | Metabolism               |
| 2.70E-06    | Metabolism               |
| 0.053791008 | Metabolism               |
| 1.67E-09    | Proliferation/Metastasis |
| 6.01E-05    | Metabolism               |
| 8.67E-05    | Metabolism               |
| 0.578993615 | Proliferation/Metastasis |
| 2.45E-08    | Metabolism               |
| 0.002647375 | Metabolism               |
| 0.005671102 | Metabolism               |
| 3.09E-09    | Metabolism               |
| 0.037789209 | Metabolism               |
| 3.95E-05    | Metabolism               |
| 0.143793898 | Metabolism               |
| 0.007979391 | Metabolism               |
| 0.071111212 | TME                      |
| 0.008904273 | TME                      |
| 0.052959568 | TME                      |
| 0.034432772 | TME                      |
| 0.060876284 | TME                      |

|             |                          |
|-------------|--------------------------|
| 6.90E-05    | Metabolism               |
| 0.001979023 | Metabolism               |
| 2.57E-06    | Proliferation/Metastasis |
| 0.06550709  | Metabolism               |
| 0.006179983 | Proliferation/Metastasis |
| 0.212214783 | Metabolism               |
| 0.559027547 | TME                      |
| 0.000277775 | Metabolism               |
| 0.211297291 | Metabolism               |
| 0.889334961 | Metabolism               |
| 0.46435448  | Metabolism               |
| 3.15E-05    | TME                      |
| 6.87E-06    | TME                      |
| 0.191306393 | Proliferation/Metastasis |
| 0.653348586 | Metabolism               |
| 0.428385403 | Proliferation/Metastasis |
| 0.000317989 | Proliferation/Metastasis |
| 0.926880814 | TME                      |
| 0.607541648 | TME                      |
| 0.765678751 | TME                      |
| 0.299683031 | TME                      |
| 1.58E-10    | Metabolism               |
| 0.110204111 | Proliferation/Metastasis |
| 2.36E-07    | Metabolism               |
| 0.128894619 | Metabolism               |
| 0.000943573 | Proliferation/Metastasis |
| 3.11E-10    | Proliferation/Metastasis |
| 2.50E-09    | Metabolism               |
| 0.094218746 | Metabolism               |
| 0.146942426 | Metabolism               |
| 0.065224991 | Metabolism               |
| 0.053918077 | TME                      |
| 0.020645737 | TME                      |
| 0.957320246 | TME                      |
| 0.479834178 | TME                      |
| 0.00059343  | TME                      |
| 0.75837134  | Metabolism               |
| 0.007486282 | Metabolism               |
| 3.80E-07    | Metabolism               |
| 0.023451337 | Metabolism               |
| 0.037885709 | Metabolism               |
| 0.000313857 | TME                      |
| 0.000935157 | TME                      |

|             |                          |
|-------------|--------------------------|
| 0.01555002  | TME                      |
| 0.065105084 | TME                      |
| 0.047406505 | TME                      |
| 0.525381348 | TME                      |
| 0.638685892 | TME                      |
| 0.479987816 | TME                      |
| 0.768538155 | TME                      |
| 6.91E-09    | Proliferation/Metastasis |
| 1.03E-23    | Proliferation/Metastasis |
| 0.011056462 | Metabolism               |
| 0.00018023  | Metabolism               |
| 0.924792648 | TME                      |
| 0.03941181  | Metabolism               |
| 3.31E-15    | Metabolism               |
| 0.003201058 | TME                      |
| 0.031552698 | Proliferation/Metastasis |
| 8.98E-06    | Proliferation/Metastasis |
| 0.000591047 | TME                      |
| 0.00019815  | Metabolism               |
| 0.000154507 | Metabolism               |
| 1.13E-13    | Proliferation/Metastasis |
| 0.001422046 | Proliferation/Metastasis |
| 0.464274705 | TME                      |
| 0.155464852 | TME                      |
| 0.181144316 | TME                      |
| 0.166956072 | TME                      |
| 0.000221622 | Proliferation/Metastasis |
| 8.74E-23    | TME                      |
| 0.108515645 | TME                      |
| 0.006617393 | Metabolism               |
| 0.165835524 | TME                      |
| 0.195373764 | TME                      |
| 0.458160914 | TME                      |
| 0.010877373 | TME                      |
| 0.937137962 | Metabolism               |
| 0.24235051  | Metabolism               |
| 0.234605198 | Metabolism               |
| 9.05E-08    | TME                      |
| 0.000716756 | Metabolism               |
| 0.202518275 | TME                      |
| 0.668223755 | TME                      |
| 0.834508321 | TME                      |
| 0.033738665 | TME                      |



|             |                          |
|-------------|--------------------------|
| 0.951585141 | TME                      |
| 0.083238584 | Metabolism               |
| 1.25E-17    | Proliferation/Metastasis |
| 0.000198206 | Metabolism               |
| 0.13350948  | Proliferation/Metastasis |
| 0.004532052 | Metabolism               |
| 9.53E-10    | Metabolism               |
| 5.96E-20    | Metabolism               |
| 0.347553022 | Metabolism               |
| 0.389027668 | Metabolism               |
| 1.86E-15    | Metabolism               |
| 0.005086974 | Metabolism               |
| 0.001413142 | Metabolism               |
| 0.650217519 | Metabolism               |
| 0.045145713 | Metabolism               |
| 0.477083038 | Metabolism               |
| 0.241587964 | Metabolism               |
| 0.000187488 | Metabolism               |
| 0.013972085 | Metabolism               |
| 0.033460801 | TME                      |
| 0.049224811 | Proliferation/Metastasis |
| 0.092875856 | Metabolism               |
| 6.25E-05    | Proliferation/Metastasis |
| 0.57641253  | TME                      |
| 0.049878616 | Proliferation/Metastasis |
| 0.352862539 | Proliferation/Metastasis |
| 0.427051692 | TME                      |
| 0.011212583 | TME                      |
| 2.07E-07    | Metabolism               |
| 0.000103598 | Metabolism               |
| 0.000466656 | Proliferation/Metastasis |
| 4.75E-10    | Proliferation/Metastasis |
| 0.12070899  | Proliferation/Metastasis |
| 2.27E-07    | Metabolism               |
| 0.127373144 | Metabolism               |
| 3.35E-08    | Metabolism               |
| 0.005815325 | Proliferation/Metastasis |
| 0.368172919 | TME                      |
| 0.026238595 | TME                      |
| 0.314483838 | Metabolism               |
| 0.101953035 | Proliferation/Metastasis |
| 3.73E-06    | Metabolism               |
| 0.656943336 | TME                      |

|             |                          |
|-------------|--------------------------|
| 0.148212383 | TME                      |
| 1.65E-16    | TME                      |
| 2.31E-08    | TME                      |
| 0.009584374 | Metabolism               |
| 4.19E-09    | TME                      |
| 6.08E-10    | Proliferation/Metastasis |
| 0.002940947 | TME                      |
| 1.46E-05    | Proliferation/Metastasis |
| 0.219756924 | Proliferation/Metastasis |
| 0.003479017 | Metabolism               |
| 0.03616861  | Proliferation/Metastasis |
| 0.149780476 | TME                      |
| 0.070830897 | Metabolism               |
| 0.010201039 | TME                      |
| 0.006106154 | TME                      |
| 0.153337495 | TME                      |
| 0.603959981 | TME                      |
| 0.852053498 | TME                      |
| 0.303487768 | TME                      |
| 5.46E-06    | Metabolism               |
| 0.033254098 | TME                      |
| 0.29359871  | Metabolism               |
| 0.000660861 | Metabolism               |
| 0.289918745 | Proliferation/Metastasis |
| 8.33E-13    | Proliferation/Metastasis |
| 1.37E-09    | Metabolism               |
| 1.72E-08    | Metabolism               |
| 1.20E-06    | Metabolism               |
| 3.49E-06    | Metabolism               |
| 0.030822466 | Proliferation/Metastasis |
| 0.054129381 | Proliferation/Metastasis |
| 0.238881286 | Metabolism               |
| 0.020876772 | Metabolism               |
| 0.370380191 | Metabolism               |
| 6.25E-22    | TME                      |
| 1.36E-05    | Metabolism               |
| 0.76920387  | Metabolism               |
| 0.004725785 | Metabolism               |
| 6.81E-10    | Metabolism               |
| 0.100449895 | Proliferation/Metastasis |
| 0.909204335 | Metabolism               |
| 0.000902769 | Metabolism               |
| 1.45E-06    | Metabolism               |

|             |                          |
|-------------|--------------------------|
| 0.10989619  | Metabolism               |
| 0.017465    | Metabolism               |
| 0.987582602 | Metabolism               |
| 0.353495018 | Proliferation/Metastasis |
| 0.157095299 | Metabolism               |
| 0.216761893 | Metabolism               |
| 0.142189803 | Proliferation/Metastasis |
| 6.36E-07    | Metabolism               |
| 1.58E-20    | Metabolism               |
| 7.16E-25    | Metabolism               |
| 0.186840894 | Metabolism               |
| 7.50E-05    | Metabolism               |
| 0.025192105 | Metabolism               |
| 0.392748286 | Metabolism               |
| 0.530164293 | Metabolism               |
| 0.179179887 | TME                      |
| 0.970010707 | TME                      |
| 0.989508284 | TME                      |
| 0.598649278 | TME                      |
| 0.686739751 | TME                      |
| 0.000346829 | Metabolism               |
| 0.70434452  | Metabolism               |
| 0.181645258 | Proliferation/Metastasis |
| 1.21E-05    | Metabolism               |
| 0.271660342 | Proliferation/Metastasis |
| 0.590257353 | Metabolism               |
| 0.484501301 | TME                      |
| 4.18E-05    | Metabolism               |
| 0.242260912 | Metabolism               |
| 0.008444731 | Metabolism               |
| 0.001312963 | Metabolism               |
| 4.18E-19    | TME                      |
| 5.01E-20    | TME                      |
| 3.57E-09    | Proliferation/Metastasis |
| 0.0475208   | Metabolism               |
| 0.00391144  | Proliferation/Metastasis |
| 5.09E-11    | Proliferation/Metastasis |
| 0.021206233 | TME                      |
| 1.26E-08    | TME                      |
| 3.72E-14    | TME                      |
| 5.32E-09    | TME                      |
| 0.229465338 | Metabolism               |
| 0.618648605 | Proliferation/Metastasis |

|             |                          |
|-------------|--------------------------|
| 1.82E-07    | Metabolism               |
| 0.377503373 | Metabolism               |
| 0.025105427 | Proliferation/Metastasis |
| 2.95E-20    | Proliferation/Metastasis |
| 0.0010918   | Metabolism               |
| 7.83E-08    | Metabolism               |
| 0.425882373 | Metabolism               |
| 9.46E-12    | Metabolism               |
| 0.00120992  | TME                      |
| 3.44E-25    | TME                      |
| 1.50E-13    | TME                      |
| 9.05E-08    | TME                      |
| 1.84E-07    | TME                      |
| 9.54E-05    | Metabolism               |
| 0.000147907 | Metabolism               |
| 9.07E-08    | Metabolism               |
| 6.89E-11    | Metabolism               |
| 0.002010598 | Metabolism               |
| 2.56E-32    | TME                      |
| 9.60E-19    | TME                      |
| 9.16E-07    | TME                      |
| 0.00030831  | TME                      |
| 2.27E-16    | TME                      |
| 1.20E-09    | TME                      |
| 3.19E-11    | TME                      |
| 0.000893749 | TME                      |
| 5.14E-07    | TME                      |
| 5.27E-14    | Proliferation/Metastasis |
| 3.95E-11    | Proliferation/Metastasis |
| 0.003141049 | Metabolism               |
| 0.202503315 | Metabolism               |
| 0.000745277 | TME                      |
| 0.069672139 | Metabolism               |
| 2.54E-31    | Metabolism               |
| 6.98E-16    | TME                      |
| 1.44E-36    | Proliferation/Metastasis |
| 1.95E-08    | Proliferation/Metastasis |
| 0.105253588 | TME                      |
| 2.62E-24    | Metabolism               |
| 5.84E-31    | Metabolism               |
| 0.543112701 | Proliferation/Metastasis |
| 3.82E-26    | Proliferation/Metastasis |
| 5.00E-18    | TME                      |

|             |                          |
|-------------|--------------------------|
| 7.74E-15    | TME                      |
| 8.03E-09    | TME                      |
| 2.32E-19    | TME                      |
| 9.53E-14    | Proliferation/Metastasis |
| 2.21E-10    | TME                      |
| 8.45E-13    | TME                      |
| 0.000636062 | Metabolism               |
| 2.86E-23    | TME                      |
| 1.65E-18    | TME                      |
| 3.32E-05    | TME                      |
| 0.18509657  | TME                      |
| 0.485607085 | Metabolism               |
| 1.80E-07    | Metabolism               |
| 3.03E-09    | Metabolism               |
| 4.20E-18    | TME                      |
| 2.32E-21    | Metabolism               |
| 5.08E-08    | TME                      |
| 2.53E-11    | TME                      |
| 2.21E-13    | TME                      |
| 0.064752678 | TME                      |
| 8.57E-13    | TME                      |
| 1.74E-12    | Metabolism               |
| 2.16E-17    | Proliferation/Metastasis |
| 0.085626608 | Metabolism               |
| 1.49E-20    | Proliferation/Metastasis |
| 6.92E-08    | Metabolism               |
| 1.69E-08    | Metabolism               |
| 3.82E-08    | Metabolism               |
| 2.94E-18    | Metabolism               |
| 0.000101191 | Metabolism               |
| 0.019271112 | Metabolism               |
| 7.88E-05    | Metabolism               |
| 1.10E-06    | Metabolism               |
| 0.000504254 | Metabolism               |
| 0.000223033 | Metabolism               |
| 1.66E-07    | Metabolism               |
| 1.49E-14    | Metabolism               |
| 4.83E-07    | Metabolism               |
| 2.74E-11    | Metabolism               |
| 2.19E-12    | TME                      |
| 5.60E-28    | Proliferation/Metastasis |
| 0.000212803 | Metabolism               |
| 9.36E-18    | Proliferation/Metastasis |

|             |                          |
|-------------|--------------------------|
| 1.61E-09    | TME                      |
| 5.02E-24    | Proliferation/Metastasis |
| 5.13E-28    | Proliferation/Metastasis |
| 7.43E-19    | TME                      |
| 1.14E-09    | TME                      |
| 6.79E-35    | Metabolism               |
| 6.20E-68    | Metabolism               |
| 1.34E-28    | Proliferation/Metastasis |
| 0.012948093 | Proliferation/Metastasis |
| 2.02E-34    | Proliferation/Metastasis |
| 1.68E-10    | Metabolism               |
| 4.64E-26    | Metabolism               |
| 0.002140267 | Metabolism               |
| 2.10E-05    | Proliferation/Metastasis |
| 4.26E-20    | TME                      |
| 6.51E-18    | TME                      |
| 0.718020771 | Metabolism               |
| 2.23E-41    | Proliferation/Metastasis |
| 6.72E-59    | Metabolism               |
| 1.03E-09    | TME                      |
| 0.000118813 | TME                      |
| 3.20E-08    | TME                      |
| 2.38E-27    | TME                      |
| 6.69E-23    | Metabolism               |
| 6.09E-19    | TME                      |
| 6.06E-53    | Proliferation/Metastasis |
| 2.81E-13    | TME                      |
| 1.25E-16    | Proliferation/Metastasis |
| 0.008532173 | Proliferation/Metastasis |
| 6.15E-52    | Metabolism               |
| 6.17E-09    | Proliferation/Metastasis |
| 1.74E-22    | TME                      |
| 0.749365272 | Metabolism               |
| 0.704409168 | TME                      |
| 4.57E-13    | TME                      |
| 2.52E-05    | TME                      |
| 2.39E-13    | TME                      |
| 0.005167109 | TME                      |
| 2.57E-14    | TME                      |
| 0.000162484 | Metabolism               |
| 1.18E-17    | TME                      |
| 0.003676621 | Metabolism               |
| 0.001489139 | Metabolism               |

|             |                          |
|-------------|--------------------------|
| 5.19E-34    | Proliferation/Metastasis |
| 0.006972514 | Proliferation/Metastasis |
| 0.851922897 | Metabolism               |
| 0.183024419 | Metabolism               |
| 3.09E-07    | Metabolism               |
| 1.85E-36    | Metabolism               |
| 2.53E-08    | Proliferation/Metastasis |
| 7.87E-26    | Proliferation/Metastasis |
| 0.089246266 | Metabolism               |
| 4.89E-09    | Metabolism               |
| 1.59E-05    | Metabolism               |
| 5.77E-06    | TME                      |
| 5.85E-08    | Metabolism               |
| 0.005398216 | Metabolism               |
| 0.27821828  | Metabolism               |
| 3.18E-36    | Metabolism               |
| 5.10E-08    | Proliferation/Metastasis |
| 2.70E-18    | Metabolism               |
| 0.000681935 | Metabolism               |
| 0.01509849  | Metabolism               |
| 6.29E-11    | Metabolism               |
| 4.51E-15    | Metabolism               |
| 1.38E-07    | Metabolism               |
| 0.17576793  | Proliferation/Metastasis |
| 6.19E-15    | Metabolism               |
| 4.81E-08    | Metabolism               |
| 8.66E-26    | Proliferation/Metastasis |
| 0.93232006  | Metabolism               |
| 1.17E-38    | Metabolism               |
| 1.55E-18    | Metabolism               |
| 0.228953895 | Metabolism               |
| 3.98E-12    | Metabolism               |
| 3.30E-23    | Metabolism               |
| 4.66E-06    | Metabolism               |
| 4.98E-10    | Metabolism               |
| 4.87E-15    | TME                      |
| 4.29E-11    | TME                      |
| 9.70E-17    | TME                      |
| 9.69E-16    | TME                      |
| 6.36E-06    | TME                      |
| 4.20E-12    | Metabolism               |
| 0.001416393 | Metabolism               |
| 5.44E-44    | Proliferation/Metastasis |

|             |                          |
|-------------|--------------------------|
| 1.11E-21    | Metabolism               |
| 4.74E-32    | Proliferation/Metastasis |
| 1.18E-05    | Metabolism               |
| 0.000197777 | TME                      |
| 1.56E-14    | Metabolism               |
| 2.05E-13    | Metabolism               |
| 0.000903897 | Metabolism               |
| 1.88E-06    | Metabolism               |
| 0.93560153  | TME                      |
| 0.289128707 | TME                      |
| 2.07E-09    | Proliferation/Metastasis |
| 3.12E-12    | Metabolism               |
| 0.269486354 | Proliferation/Metastasis |
| 0.505270776 | Proliferation/Metastasis |
| 4.10E-13    | TME                      |
| 2.14E-07    | TME                      |
| 1.21E-06    | TME                      |
| 5.06E-07    | TME                      |
| 0.124837603 | Metabolism               |
| 9.59E-06    | Proliferation/Metastasis |
| 0.215344564 | Metabolism               |
| 5.60E-05    | Metabolism               |
| 0.581201883 | Proliferation/Metastasis |
| 9.10E-06    | Proliferation/Metastasis |
| 0.003820796 | Metabolism               |
| 0.001274084 | Metabolism               |
| 0.707561304 | Metabolism               |
| 0.262602192 | Metabolism               |
| 3.52E-05    | TME                      |
| 1.30E-05    | TME                      |
| 5.84E-08    | TME                      |
| 7.78E-06    | TME                      |
| 6.74E-05    | TME                      |
| 0.414772255 | Metabolism               |
| 0.009401196 | Metabolism               |
| 0.000971355 | Metabolism               |
| 0.316585461 | Metabolism               |
| 0.002522351 | Metabolism               |
| 4.19E-07    | TME                      |
| 1.05E-17    | TME                      |
| 7.90E-09    | TME                      |
| 1.58E-06    | TME                      |
| 2.98E-07    | TME                      |



|             |                          |
|-------------|--------------------------|
| 7.53E-05    | TME                      |
| 4.31E-05    | TME                      |
| 1.88E-06    | TME                      |
| 0.000270034 | TME                      |
| 0.010086176 | Proliferation/Metastasis |
| 0.01314987  | Proliferation/Metastasis |
| 0.01826997  | Metabolism               |
| 0.003719    | Metabolism               |
| 6.46E-09    | TME                      |
| 0.073520584 | Metabolism               |
| 0.437850433 | Metabolism               |
| 5.69E-09    | TME                      |
| 0.841721495 | Proliferation/Metastasis |
| 0.512827965 | Proliferation/Metastasis |
| 0.000455328 | TME                      |
| 0.459215806 | Metabolism               |
| 0.087862897 | Metabolism               |
| 0.025495286 | Proliferation/Metastasis |
| 0.00053566  | Proliferation/Metastasis |
| 3.56E-06    | TME                      |
| 1.64E-09    | TME                      |
| 1.89E-05    | TME                      |
| 1.14E-05    | TME                      |
| 3.48E-07    | Proliferation/Metastasis |
| 1.22E-08    | TME                      |
| 1.38E-06    | TME                      |
| 0.03470451  | Metabolism               |
| 1.57E-05    | TME                      |
| 1.85E-05    | TME                      |
| 7.63E-05    | TME                      |
| 0.000290167 | TME                      |
| 0.003692464 | Metabolism               |
| 0.271129557 | Metabolism               |
| 0.812451205 | Metabolism               |
| 8.75E-06    | TME                      |
| 6.09E-05    | Metabolism               |
| 0.000333016 | TME                      |
| 4.86E-05    | TME                      |
| 1.05E-06    | TME                      |
| 0.011624274 | TME                      |
| 3.29E-06    | TME                      |
| 0.003340583 | Metabolism               |
| 0.122969271 | Proliferation/Metastasis |

|             |                          |
|-------------|--------------------------|
| 6.31E-06    | Metabolism               |
| 0.563944664 | Proliferation/Metastasis |
| 5.02E-06    | Metabolism               |
| 0.126630351 | Metabolism               |
| 0.444064511 | Metabolism               |
| 0.10460974  | Metabolism               |
| 6.77E-05    | Metabolism               |
| 0.000182409 | Metabolism               |
| 0.33742455  | Metabolism               |
| 0.013097274 | Metabolism               |
| 0.08940672  | Metabolism               |
| 0.033977791 | Metabolism               |
| 3.02E-18    | Metabolism               |
| 2.06E-13    | Metabolism               |
| 6.56E-06    | Metabolism               |
| 0.989337161 | Metabolism               |
| 4.71E-08    | TME                      |
| 0.615090503 | Proliferation/Metastasis |
| 0.02244493  | Metabolism               |
| 1.41E-12    | Proliferation/Metastasis |
| 0.00072989  | TME                      |
| 4.05E-06    | Proliferation/Metastasis |
| 7.03E-07    | Proliferation/Metastasis |
| 0.296898473 | TME                      |
| 7.34E-11    | TME                      |
| 0.045746525 | Metabolism               |
| 0.074921588 | Metabolism               |
| 2.43E-10    | Proliferation/Metastasis |
| 0.147431461 | Proliferation/Metastasis |
| 0.000108174 | Proliferation/Metastasis |
| 0.279485554 | Metabolism               |
| 3.18E-07    | Metabolism               |
| 0.228793267 | Metabolism               |
| 0.888211116 | Proliferation/Metastasis |
| 1.46E-06    | TME                      |
| 2.58E-09    | TME                      |
| 0.462269459 | Metabolism               |
| 1.58E-06    | Proliferation/Metastasis |
| 0.008314608 | Metabolism               |
| 1.09E-05    | TME                      |
| 1.53E-07    | TME                      |
| 1.60E-07    | TME                      |
| 1.30E-08    | TME                      |

|             |                          |
|-------------|--------------------------|
| 0.391057051 | Metabolism               |
| 0.218061696 | TME                      |
| 0.517803227 | Proliferation/Metastasis |
| 2.22E-08    | TME                      |
| 0.045963223 | Proliferation/Metastasis |
| 5.25E-12    | Proliferation/Metastasis |
| 0.698135957 | Metabolism               |
| 0.051001629 | Proliferation/Metastasis |
| 1.36E-06    | TME                      |
| 0.003832882 | Metabolism               |
| 0.000162777 | TME                      |
| 0.243347083 | TME                      |
| 0.055513176 | TME                      |
| 4.46E-06    | TME                      |
| 1.39E-05    | TME                      |
| 0.088828978 | TME                      |
| 0.008579584 | Metabolism               |
| 2.61E-08    | TME                      |
| 1.12E-08    | Metabolism               |
| 0.000344074 | Metabolism               |
| 2.19E-08    | Proliferation/Metastasis |
| 0.246129285 | Proliferation/Metastasis |
| 0.09866601  | Metabolism               |
| 0.10474069  | Metabolism               |
| 0.653499376 | Metabolism               |
| 0.010303595 | Metabolism               |
| 1.74E-05    | Proliferation/Metastasis |
| 7.98E-11    | Proliferation/Metastasis |
| 0.000876527 | Metabolism               |
| 0.580430389 | Metabolism               |
| 0.060056957 | Metabolism               |
| 6.12E-09    | TME                      |
| 0.000445282 | Metabolism               |
| 1.66E-07    | Metabolism               |
| 0.001387649 | Metabolism               |
| 0.943555995 | Metabolism               |
| 4.42E-07    | Proliferation/Metastasis |
| 0.14782586  | Metabolism               |
| 0.007118552 | Metabolism               |
| 0.824408444 | Metabolism               |
| 0.026225113 | Metabolism               |
| 0.852345481 | Metabolism               |
| 0.001833429 | Metabolism               |

|             |                          |
|-------------|--------------------------|
| 0.218804075 | Proliferation/Metastasis |
| 0.098432854 | Metabolism               |
| 0.001114197 | Metabolism               |
| 0.989444711 | Proliferation/Metastasis |
| 0.262658393 | Metabolism               |
| 0.012595829 | Metabolism               |
| 7.31E-06    | Metabolism               |
| 1.72E-06    | Metabolism               |
| 0.864087733 | Metabolism               |
| 0.488408832 | Metabolism               |
| 0.174536814 | Metabolism               |
| 0.526151595 | Metabolism               |
| 2.71E-05    | TME                      |
| 0.00200403  | TME                      |
| 6.56E-07    | TME                      |
| 4.28E-06    | TME                      |
| 1.70E-05    | TME                      |
| 0.000911723 | Metabolism               |
| 0.861482896 | Metabolism               |
| 0.520471035 | Proliferation/Metastasis |
| 0.115056115 | Metabolism               |
| 5.20E-07    | Proliferation/Metastasis |
| 0.019483332 | Metabolism               |
| 0.002439767 | TME                      |
| 0.005181975 | Metabolism               |
| 0.106085523 | Metabolism               |
| 3.08E-08    | Metabolism               |
| 0.807097675 | Metabolism               |
| 0.738363786 | TME                      |
| 0.00537614  | TME                      |
| 7.03E-05    | Proliferation/Metastasis |
| 0.017565715 | Metabolism               |
| 8.74E-12    | Proliferation/Metastasis |
| 0.059950805 | Proliferation/Metastasis |
| 0.077092953 | TME                      |
| 0.939548969 | TME                      |
| 0.029686658 | TME                      |
| 0.27258757  | TME                      |
| 0.383445971 | Metabolism               |
| 0.005716897 | Proliferation/Metastasis |
| 2.55E-06    | Metabolism               |
| 0.001773281 | Metabolism               |
| 0.029817301 | Proliferation/Metastasis |

|             |                          |
|-------------|--------------------------|
| 0.011798965 | Proliferation/Metastasis |
| 2.00E-08    | Metabolism               |
| 0.962492496 | Metabolism               |
| 0.784446675 | Metabolism               |
| 0.190833396 | Metabolism               |
| 0.273630091 | TME                      |
| 0.002286617 | TME                      |
| 0.014089936 | TME                      |
| 0.605415437 | TME                      |
| 0.031929343 | TME                      |
| 0.010800237 | Metabolism               |
| 0.341449849 | Metabolism               |
| 0.886229546 | Metabolism               |
| 0.828170527 | Metabolism               |
| 0.000238598 | Metabolism               |
| 1.05E-08    | TME                      |
| 0.000342136 | TME                      |
| 0.345580822 | TME                      |
| 0.221666599 | TME                      |
| 0.021289298 | TME                      |
| 0.078241641 | TME                      |
| 0.066320628 | TME                      |
| 0.689806473 | TME                      |
| 0.077988671 | TME                      |
| 0.00023951  | Proliferation/Metastasis |
| 6.60E-15    | Proliferation/Metastasis |
| 0.567657038 | Metabolism               |
| 0.822470309 | Metabolism               |
| 0.333296632 | TME                      |
| 0.367786224 | Metabolism               |
| 5.13E-05    | Metabolism               |
| 0.10587075  | TME                      |
| 8.32E-28    | Proliferation/Metastasis |
| 3.24E-11    | Proliferation/Metastasis |
| 0.422714543 | TME                      |
| 4.74E-05    | Metabolism               |
| 1.29E-15    | Metabolism               |
| 0.138637133 | Proliferation/Metastasis |
| 0.000763061 | Proliferation/Metastasis |
| 0.00855966  | TME                      |
| 0.167246446 | TME                      |
| 0.011834471 | TME                      |
| 0.000411357 | TME                      |

|             |                          |
|-------------|--------------------------|
| 3.66E-09    | Proliferation/Metastasis |
| 1.12E-09    | TME                      |
| 0.727699764 | TME                      |
| 0.480260206 | Metabolism               |
| 3.63E-05    | TME                      |
| 0.005831635 | TME                      |
| 0.625968215 | TME                      |
| 0.342795223 | TME                      |
| 0.732632761 | Metabolism               |
| 0.970874563 | Metabolism               |
| 0.069370565 | Metabolism               |
| 0.000171506 | TME                      |
| 0.012796874 | Metabolism               |
| 0.190427713 | TME                      |
| 0.473835337 | TME                      |
| 0.177332811 | TME                      |
| 0.052483077 | TME                      |
| 0.373435128 | TME                      |
| 5.59E-12    | Metabolism               |
| 2.21E-08    | Proliferation/Metastasis |
| 8.43E-05    | Metabolism               |
| 3.66E-07    | Proliferation/Metastasis |
| 0.000126097 | Metabolism               |
| 0.380518059 | Metabolism               |
| 2.83E-07    | Metabolism               |
| 0.09212073  | Metabolism               |
| 0.056990914 | Metabolism               |
| 0.863065097 | Metabolism               |
| 0.001670071 | Metabolism               |
| 0.005772789 | Metabolism               |
| 0.50360931  | Metabolism               |
| 0.404545296 | Metabolism               |
| 0.490459691 | Metabolism               |
| 0.301844097 | Metabolism               |
| 0.888245931 | Metabolism               |
| 0.00097605  | Metabolism               |
| 0.352677922 | TME                      |
| 2.70E-23    | Proliferation/Metastasis |
| 0.009793673 | Metabolism               |
| 0.290931441 | Proliferation/Metastasis |
| 0.150409861 | TME                      |
| 0.014808632 | Proliferation/Metastasis |
| 0.015443082 | Proliferation/Metastasis |

|             |                          |
|-------------|--------------------------|
| 0.375584912 | TME                      |
| 0.009906517 | TME                      |
| 1.24E-27    | Metabolism               |
| 2.19E-18    | Metabolism               |
| 4.46E-08    | Proliferation/Metastasis |
| 0.140279553 | Proliferation/Metastasis |
| 0.000169476 | Proliferation/Metastasis |
| 2.18E-11    | Metabolism               |
| 0.002907722 | Metabolism               |
| 0.000812296 | Metabolism               |
| 0.753493894 | Proliferation/Metastasis |
| 0.020142912 | TME                      |
| 0.319875865 | TME                      |
| 0.235625627 | Metabolism               |
| 8.60E-11    | Proliferation/Metastasis |
| 2.76E-19    | Metabolism               |
| 0.014180641 | TME                      |
| 0.041310748 | TME                      |
| 0.652557357 | TME                      |
| 9.64E-09    | TME                      |
| 3.35E-12    | Metabolism               |
| 0.000119042 | TME                      |
| 7.76E-22    | Proliferation/Metastasis |
| 0.781880712 | TME                      |
| 2.20E-25    | Proliferation/Metastasis |
| 0.011959985 | Proliferation/Metastasis |
| 8.22E-24    | Metabolism               |
| 1.05E-09    | Proliferation/Metastasis |
| 0.00827582  | TME                      |
| 1.04E-06    | Metabolism               |
| 0.810290382 | TME                      |
| 0.001165095 | TME                      |
| 0.003934214 | TME                      |
| 0.168210394 | TME                      |
| 0.042551167 | TME                      |
| 5.76E-05    | TME                      |
| 0.085223947 | Metabolism               |
| 0.610341774 | TME                      |
| 0.156880705 | Metabolism               |
| 1.67E-07    | Metabolism               |
| 0.018988918 | Proliferation/Metastasis |
| 0.247753613 | Proliferation/Metastasis |
| 0.891423163 | Metabolism               |

|             |                          |
|-------------|--------------------------|
| 1.23E-06    | Metabolism               |
| 2.52E-07    | Metabolism               |
| 3.36E-14    | Metabolism               |
| 0.317617471 | Proliferation/Metastasis |
| 0.000661133 | Proliferation/Metastasis |
| 0.760144669 | Metabolism               |
| 0.132263064 | Metabolism               |
| 0.025874806 | Metabolism               |
| 0.004530159 | TME                      |
| 0.087897939 | Metabolism               |
| 0.001776146 | Metabolism               |
| 0.253357056 | Metabolism               |
| 5.28E-18    | Metabolism               |
| 1.36E-11    | Proliferation/Metastasis |
| 3.50E-05    | Metabolism               |
| 0.426438175 | Metabolism               |
| 0.005508764 | Metabolism               |
| 5.18E-09    | Metabolism               |
| 2.55E-17    | Metabolism               |
| 0.250078754 | Metabolism               |
| 0.700151076 | Proliferation/Metastasis |
| 0.019727623 | Metabolism               |
| 0.00668913  | Metabolism               |
| 1.19E-11    | Proliferation/Metastasis |
| 0.002017392 | Metabolism               |
| 2.80E-31    | Metabolism               |
| 2.91E-13    | Metabolism               |
| 0.017193711 | Metabolism               |
| 3.86E-05    | Metabolism               |
| 9.56E-06    | Metabolism               |
| 0.722848949 | Metabolism               |
| 0.053646139 | Metabolism               |
| 0.043196623 | TME                      |
| 0.345781542 | TME                      |
| 0.107522486 | TME                      |
| 0.478798154 | TME                      |
| 0.980483846 | TME                      |
| 8.83E-09    | Metabolism               |
| 0.251976304 | Metabolism               |
| 4.41E-20    | Proliferation/Metastasis |
| 0.038206138 | Metabolism               |
| 0.185471426 | Proliferation/Metastasis |
| 0.578782224 | Metabolism               |



|             |                          |
|-------------|--------------------------|
| 0.653425187 | TME                      |
| 0.002814572 | Metabolism               |
| 0.000499012 | Metabolism               |
| 3.19E-07    | Metabolism               |
| 0.227452999 | Metabolism               |
| 0.02290828  | TME                      |
| 0.051146481 | TME                      |
| 0.000722944 | Proliferation/Metastasis |
| 0.59331701  | Metabolism               |
| 0.015541088 | Proliferation/Metastasis |
| 0.000337265 | Proliferation/Metastasis |
| 1.07E-11    | TME                      |
| 1.72E-12    | TME                      |
| 6.40E-06    | TME                      |
| 2.72E-08    | TME                      |
| 0.009609619 | Metabolism               |
| 3.01E-19    | Proliferation/Metastasis |
| 3.98E-07    | Metabolism               |
| 5.08E-10    | Metabolism               |
| 2.87E-14    | Proliferation/Metastasis |
| 1.21E-16    | Proliferation/Metastasis |
| 2.03E-39    | Metabolism               |
| 5.26E-13    | Metabolism               |
| 0.221316585 | Metabolism               |
| 2.49E-28    | Metabolism               |
| 0.629809493 | TME                      |
| 2.88E-27    | TME                      |
| 1.54E-05    | TME                      |
| 2.73E-10    | TME                      |
| 1.60E-66    | TME                      |
| 8.65E-20    | Metabolism               |
| 0.003272376 | Metabolism               |
| 2.63E-13    | Metabolism               |
| 3.08E-37    | Metabolism               |
| 0.303379286 | Metabolism               |
| 2.02E-11    | TME                      |
| 0.087827085 | TME                      |
| 6.71E-06    | TME                      |
| 0.818541607 | TME                      |
| 1.06E-15    | TME                      |
| 1.02E-08    | TME                      |
| 4.00E-10    | TME                      |
| 4.47E-05    | TME                      |

|             |                          |
|-------------|--------------------------|
| 0.00166118  | TME                      |
| 4.03E-12    | Proliferation/Metastasis |
| 9.97E-07    | Proliferation/Metastasis |
| 3.71E-12    | Metabolism               |
| 0.295616453 | Metabolism               |
| 0.092601976 | TME                      |
| 0.176599011 | Metabolism               |
| 1.84E-26    | Metabolism               |
| 1.60E-13    | TME                      |
| 2.04E-05    | Proliferation/Metastasis |
| 4.63E-12    | Proliferation/Metastasis |
| 0.000717142 | TME                      |
| 0.345566277 | Metabolism               |
| 0.002387398 | Metabolism               |
| 0.06825289  | Proliferation/Metastasis |
| 3.46E-09    | Proliferation/Metastasis |
| 2.76E-06    | TME                      |
| 4.48E-17    | TME                      |
| 0.010936051 | TME                      |
| 5.84E-09    | TME                      |
| 0.017698476 | Proliferation/Metastasis |
| 2.74E-06    | TME                      |
| 3.64E-22    | TME                      |
| 9.65E-11    | Metabolism               |
| 1.04E-12    | TME                      |
| 7.13E-19    | TME                      |
| 4.74E-08    | TME                      |
| 9.09E-06    | TME                      |
| 8.82E-06    | Metabolism               |
| 2.11E-28    | Metabolism               |
| 0.405055412 | Metabolism               |
| 2.58E-06    | TME                      |
| 2.90E-05    | Metabolism               |
| 0.000190174 | TME                      |
| 0.000122597 | TME                      |
| 4.27E-11    | TME                      |
| 0.081606959 | TME                      |
| 8.30E-19    | TME                      |
| 0.003507049 | Metabolism               |
| 0.365399895 | Proliferation/Metastasis |
| 0.016928272 | Metabolism               |
| 2.15E-07    | Proliferation/Metastasis |
| 4.76E-07    | Metabolism               |

|             |                          |
|-------------|--------------------------|
| 7.03E-27    | Metabolism               |
| 7.85E-07    | Metabolism               |
| 4.39E-30    | Metabolism               |
| 9.11E-10    | Metabolism               |
| 2.50E-10    | Metabolism               |
| 0.870473033 | Metabolism               |
| 1.24E-16    | Metabolism               |
| 3.95E-59    | Metabolism               |
| 3.34E-14    | Metabolism               |
| 5.93E-22    | Metabolism               |
| 1.09E-25    | Metabolism               |
| 1.19E-07    | Metabolism               |
| 2.87E-11    | Metabolism               |
| 5.14E-14    | TME                      |
| 0.086718581 | Proliferation/Metastasis |
| 0.000485451 | Metabolism               |
| 9.68E-16    | Proliferation/Metastasis |
| 1.53E-09    | TME                      |
| 2.60E-45    | Proliferation/Metastasis |
| 7.50E-30    | Proliferation/Metastasis |
| 4.58E-68    | TME                      |
| 1.33E-24    | TME                      |
| 0.003409214 | Metabolism               |
| 6.61E-07    | Metabolism               |
| 3.51E-09    | Proliferation/Metastasis |
| 0.463891149 | Proliferation/Metastasis |
| 1.58E-34    | Proliferation/Metastasis |
| 6.41E-08    | Metabolism               |
| 1.55E-17    | Metabolism               |
| 3.36E-63    | Metabolism               |
| 1.50E-42    | Proliferation/Metastasis |
| 8.35E-23    | TME                      |
| 7.45E-16    | TME                      |
| 1.43E-07    | Metabolism               |
| 8.08E-12    | Proliferation/Metastasis |
| 0.008526462 | Metabolism               |
| 0.132232532 | TME                      |
| 0.165311125 | TME                      |
| 1.25E-16    | TME                      |
| 0.000116959 | TME                      |
| 1.93E-07    | Metabolism               |
| 4.07E-45    | TME                      |
| 0.005093788 | Proliferation/Metastasis |

|             |                          |
|-------------|--------------------------|
| 1.07E-38    | TME                      |
| 0.033073083 | Proliferation/Metastasis |
| 0.336554718 | Proliferation/Metastasis |
| 6.08E-10    | Metabolism               |
| 3.07E-10    | Proliferation/Metastasis |
| 4.17E-14    | TME                      |
| 3.36E-09    | Metabolism               |
| 0.002787087 | TME                      |
| 2.47E-14    | TME                      |
| 1.44E-05    | TME                      |
| 2.14E-15    | TME                      |
| 4.14E-13    | TME                      |
| 7.56E-10    | TME                      |
| 0.017297237 | Metabolism               |
| 9.22E-51    | TME                      |
| 0.782631678 | Metabolism               |
| 4.04E-19    | Metabolism               |
| 1.84E-22    | Proliferation/Metastasis |
| 3.25E-06    | Proliferation/Metastasis |
| 2.84E-08    | Metabolism               |
| 3.31E-06    | Metabolism               |
| 0.045019304 | Metabolism               |
| 0.039459193 | Metabolism               |
| 2.21E-92    | Proliferation/Metastasis |
| 4.30E-40    | Proliferation/Metastasis |
| 0.103271754 | Metabolism               |
| 0.75326708  | Metabolism               |
| 0.457286928 | Metabolism               |
| 0.996192163 | TME                      |
| 0.002246915 | Metabolism               |
| 0.277203022 | Metabolism               |
| 0.000928388 | Metabolism               |
| 0.000497477 | Metabolism               |
| 0.03322144  | Proliferation/Metastasis |
| 1.06E-09    | Metabolism               |
| 1.45E-09    | Metabolism               |
| 4.45E-40    | Metabolism               |
| 8.37E-05    | Metabolism               |
| 1.55E-12    | Metabolism               |
| 1.25E-18    | Metabolism               |
| 0.005561099 | Proliferation/Metastasis |
| 0.497730304 | Metabolism               |
| 0.000978662 | Metabolism               |

|             |                          |
|-------------|--------------------------|
| 6.49E-07    | Proliferation/Metastasis |
| 1.00E-28    | Metabolism               |
| 0.837528583 | Metabolism               |
| 0.947622077 | Metabolism               |
| 7.49E-06    | Metabolism               |
| 0.712378605 | Metabolism               |
| 0.000107972 | Metabolism               |
| 7.06E-22    | Metabolism               |
| 3.09E-25    | Metabolism               |
| 9.74E-17    | TME                      |
| 7.96E-32    | TME                      |
| 5.43E-18    | TME                      |
| 1.93E-29    | TME                      |
| 5.93E-13    | TME                      |
| 0.005955983 | Metabolism               |
| 4.04E-25    | Metabolism               |
| 0.163390984 | Proliferation/Metastasis |
| 4.32E-12    | Metabolism               |
| 2.82E-42    | Proliferation/Metastasis |
| 5.35E-16    | Metabolism               |
| 0.44262301  | TME                      |
| 0.967819972 | Metabolism               |
| 1.24E-07    | Metabolism               |
| 0.829031779 | Metabolism               |
| 2.32E-37    | Metabolism               |
| 0.06311444  | TME                      |
| 9.98E-05    | TME                      |
| 6.61E-10    | Proliferation/Metastasis |
| 1.06E-11    | Metabolism               |
| 7.09E-05    | Proliferation/Metastasis |
| 0.84707135  | Proliferation/Metastasis |
| 7.79E-37    | TME                      |
| 0.723744862 | TME                      |
| 0.076639616 | TME                      |
| 0.176437319 | TME                      |
| 5.45E-09    | Metabolism               |
| 4.91E-07    | Proliferation/Metastasis |
| 0.630829358 | Metabolism               |
| 5.21E-14    | Metabolism               |
| 4.06E-06    | Proliferation/Metastasis |
| 0.082251256 | Proliferation/Metastasis |
| 0.00078473  | Metabolism               |
| 8.65E-34    | Metabolism               |

|             |                          |
|-------------|--------------------------|
| 5.40E-13    | Metabolism               |
| 1.64E-17    | Metabolism               |
| 0.111340768 | TME                      |
| 0.820941686 | TME                      |
| 0.095504456 | TME                      |
| 0.294024944 | TME                      |
| 1.14E-08    | TME                      |
| 4.41E-32    | Metabolism               |
| 8.88E-17    | Metabolism               |
| 1.25E-06    | Metabolism               |
| 4.85E-25    | Metabolism               |
| 0.287948814 | Metabolism               |
| 0.002801317 | TME                      |
| 0.016456136 | TME                      |
| 0.001188422 | TME                      |
| 0.01997281  | TME                      |
| 0.820250545 | TME                      |
| 0.455767443 | TME                      |
| 0.453193694 | TME                      |
| 0.003144012 | TME                      |
| 0.013053842 | TME                      |
| 0.359931499 | Proliferation/Metastasis |
| 0.007059979 | Proliferation/Metastasis |
| 6.10E-36    | Metabolism               |
| 3.38E-24    | Metabolism               |
| 3.40E-16    | TME                      |
| 0.851618209 | Metabolism               |
| 0.000192412 | Metabolism               |
| 0.971867723 | TME                      |
| 0.661948938 | Proliferation/Metastasis |
| 0.931610276 | Proliferation/Metastasis |
| 0.027315707 | TME                      |
| 0.015152828 | Metabolism               |
| 0.002074223 | Metabolism               |
| 0.009895405 | Proliferation/Metastasis |
| 0.022300054 | Proliferation/Metastasis |
| 0.286942739 | TME                      |
| 0.084791636 | TME                      |
| 0.159949715 | TME                      |
| 0.541390919 | TME                      |
| 4.21E-30    | Proliferation/Metastasis |
| 0.012102803 | TME                      |
| 0.636873834 | TME                      |

|             |                          |
|-------------|--------------------------|
| 0.284290502 | Metabolism               |
| 0.878907583 | TME                      |
| 0.255822184 | TME                      |
| 0.267347807 | TME                      |
| 7.85E-13    | TME                      |
| 1.57E-19    | Metabolism               |
| 9.42E-35    | Metabolism               |
| 3.97E-09    | Metabolism               |
| 0.113145392 | TME                      |
| 3.23E-17    | Metabolism               |
| 0.380015103 | TME                      |
| 0.70325182  | TME                      |
| 0.513200213 | TME                      |
| 0.287185785 | TME                      |
| 0.864456475 | TME                      |
| 3.04E-20    | Metabolism               |
| 0.074348029 | Proliferation/Metastasis |
| 4.49E-14    | Metabolism               |
| 6.21E-06    | Proliferation/Metastasis |
| 3.18E-07    | Metabolism               |
| 7.73E-18    | Metabolism               |
| 0.128916873 | Metabolism               |
| 1.10E-23    | Metabolism               |
| 3.61E-31    | Metabolism               |
| 0.005446458 | Metabolism               |
| 0.140081342 | Metabolism               |
| 0.003295419 | Metabolism               |
| 0.002188896 | Metabolism               |
| 0.024834713 | Metabolism               |
| 0.05218104  | Metabolism               |
| 0.278291653 | Metabolism               |
| 0.000296555 | Metabolism               |
| 7.44E-25    | Metabolism               |
| 0.515115138 | TME                      |
| 0.696746153 | Proliferation/Metastasis |
| 2.20E-09    | Metabolism               |
| 0.28347477  | Proliferation/Metastasis |
| 0.272061986 | TME                      |
| 0.100889794 | Proliferation/Metastasis |
| 0.279077548 | Proliferation/Metastasis |
| 3.51E-07    | TME                      |
| 0.412371644 | TME                      |
| 0.001847691 | Metabolism               |

|             |                          |
|-------------|--------------------------|
| 0.783929516 | Metabolism               |
| 4.31E-05    | Proliferation/Metastasis |
| 4.78E-10    | Proliferation/Metastasis |
| 0.010622818 | Proliferation/Metastasis |
| 6.72E-07    | Metabolism               |
| 0.034630934 | Metabolism               |
| 2.72E-23    | Metabolism               |
| 0.3273837   | Proliferation/Metastasis |
| 0.892569896 | TME                      |
| 0.238289586 | TME                      |
| 0.091776118 | Metabolism               |
| 0.555732344 | Proliferation/Metastasis |
| 0.000186665 | Metabolism               |
| 0.113049396 | TME                      |
| 0.009743445 | TME                      |
| 0.000124308 | TME                      |
| 0.578886803 | TME                      |
| 0.935726058 | Metabolism               |
| 1.36E-11    | TME                      |
| 0.656028194 | Proliferation/Metastasis |
| 0.212080812 | TME                      |
| 0.000110074 | Proliferation/Metastasis |
| 6.61E-34    | Proliferation/Metastasis |
| 0.033463856 | Metabolism               |
| 0.079611148 | Proliferation/Metastasis |
| 0.8424514   | TME                      |
| 1.12E-06    | Metabolism               |
| 0.005199258 | TME                      |
| 4.28E-05    | TME                      |
| 1.10E-10    | TME                      |
| 0.789291802 | TME                      |
| 0.062936628 | TME                      |
| 0.010306734 | TME                      |
| 2.91E-05    | Metabolism               |
| 0.153840005 | TME                      |
| 1.29E-27    | Metabolism               |
| 0.434819631 | Metabolism               |
| 0.570859945 | Proliferation/Metastasis |
| 0.074094187 | Proliferation/Metastasis |
| 0.034975125 | Metabolism               |
| 0.11929028  | Metabolism               |
| 0.309281046 | Metabolism               |
| 3.68E-14    | Metabolism               |



|             |                          |
|-------------|--------------------------|
| 2.70E-05    | Proliferation/Metastasis |
| 0.687762789 | Proliferation/Metastasis |
| 1.88E-30    | Metabolism               |
| 1.82E-08    | Metabolism               |
| 1.09E-21    | Metabolism               |
| 0.171824183 | TME                      |
| 3.13E-06    | Metabolism               |
| 1.11E-19    | Metabolism               |
| 0.470337895 | Metabolism               |
| 0.628076999 | Metabolism               |
| 5.15E-29    | Proliferation/Metastasis |
| 2.88E-19    | Metabolism               |
| 1.04E-11    | Metabolism               |
| 5.95E-30    | Metabolism               |
| 1.65E-06    | Metabolism               |
| 0.199315538 | Metabolism               |
| 3.45E-35    | Metabolism               |
| 4.47E-09    | Proliferation/Metastasis |
| 0.84680107  | Metabolism               |
| 3.17E-11    | Metabolism               |
| 5.27E-06    | Proliferation/Metastasis |
| 2.21E-13    | Metabolism               |
| 0.854777074 | Metabolism               |
| 0.042127184 | Metabolism               |
| 6.51E-27    | Metabolism               |
| 0.003154913 | Metabolism               |
| 0.066405509 | Metabolism               |
| 0.083670411 | Metabolism               |
| 4.03E-19    | Metabolism               |
| 0.243411701 | TME                      |
| 0.021293288 | TME                      |
| 0.602638803 | TME                      |
| 0.06427937  | TME                      |
| 0.584990881 | TME                      |
| 0.008996761 | Metabolism               |
| 3.29E-20    | Metabolism               |
| 0.749775521 | Proliferation/Metastasis |
| 4.08E-07    | Metabolism               |
| 0.000294024 | Proliferation/Metastasis |
| 3.24E-24    | Metabolism               |
| 0.095050648 | TME                      |
| 9.92E-09    | Metabolism               |
| 1.70E-11    | Metabolism               |

|             |                          |
|-------------|--------------------------|
| 6.15E-11    | Metabolism               |
| 1.57E-33    | Metabolism               |
| 0.247333949 | TME                      |
| 0.080220884 | TME                      |
| 4.25E-05    | Proliferation/Metastasis |
| 1.26E-24    | Metabolism               |
| 7.36E-12    | Proliferation/Metastasis |
| 0.000390242 | Proliferation/Metastasis |
| 0.037984078 | TME                      |
| 0.705763958 | TME                      |
| 0.585019341 | TME                      |
| 0.266178527 | TME                      |
| 0.181947562 | Metabolism               |
| 0.6289044   | Proliferation/Metastasis |
| 1.06E-06    | Metabolism               |
| 0.025389578 | Metabolism               |
| 0.001813683 | Proliferation/Metastasis |
| 5.68E-05    | Proliferation/Metastasis |
| 1.10E-07    | Metabolism               |
| 0.000123957 | Metabolism               |
| 0.031057342 | Metabolism               |
| 0.001787434 | Metabolism               |
| 0.077233527 | TME                      |
| 0.061589354 | TME                      |
| 0.904686135 | TME                      |
| 0.090233432 | TME                      |
| 5.60E-10    | TME                      |
| 0.010717485 | Metabolism               |
| 0.980403569 | Metabolism               |
| 0.206378368 | Metabolism               |
| 0.391331106 | Metabolism               |
| 0.624212193 | Metabolism               |
| 0.005735582 | TME                      |
| 0.029642107 | TME                      |
| 0.03827784  | TME                      |
| 0.559998875 | TME                      |
| 0.844932683 | TME                      |
| 0.017888533 | TME                      |
| 0.022298206 | TME                      |
| 0.775040595 | TME                      |
| 0.061386539 | TME                      |
| 0.000149891 | Proliferation/Metastasis |
| 3.74E-05    | Proliferation/Metastasis |

|             |                          |
|-------------|--------------------------|
| 0.396590611 | Metabolism               |
| 0.398045163 | Metabolism               |
| 0.058398564 | TME                      |
| 0.006182569 | Metabolism               |
| 0.368503288 | Metabolism               |
| 0.139633653 | TME                      |
| 0.535795471 | Proliferation/Metastasis |
| 0.035274131 | Proliferation/Metastasis |
| 0.163840438 | TME                      |
| 0.000428533 | Metabolism               |
| 0.012751837 | Metabolism               |
| 0.004628402 | Proliferation/Metastasis |
| 0.047016921 | Proliferation/Metastasis |
| 0.051016426 | TME                      |
| 0.911590911 | TME                      |
| 0.07217862  | TME                      |
| 0.001100593 | TME                      |
| 0.045209005 | Proliferation/Metastasis |
| 0.546727295 | TME                      |
| 0.233707557 | TME                      |
| 3.27E-06    | Metabolism               |
| 0.161425655 | TME                      |
| 0.836092109 | TME                      |
| 0.308557331 | TME                      |
| 0.056201819 | TME                      |
| 0.163669317 | Metabolism               |
| 0.904401716 | Metabolism               |
| 0.497132833 | Metabolism               |
| 0.011283841 | TME                      |
| 0.012919933 | Metabolism               |
| 0.948361603 | TME                      |
| 0.764089415 | TME                      |
| 0.177641676 | TME                      |
| 0.556274138 | TME                      |
| 0.118987537 | TME                      |
| 0.00879425  | Metabolism               |
| 0.000131243 | Proliferation/Metastasis |
| 0.534306763 | Metabolism               |
| 0.485048505 | Proliferation/Metastasis |
| 0.001346426 | Metabolism               |
| 0.175276477 | Metabolism               |
| 2.61E-07    | Metabolism               |
| 0.021789753 | Metabolism               |

|             |                          |
|-------------|--------------------------|
| 0.024839881 | Metabolism               |
| 0.000258492 | Metabolism               |
| 0.137584198 | Metabolism               |
| 0.351077545 | Metabolism               |
| 9.34E-05    | Metabolism               |
| 0.12981413  | Metabolism               |
| 0.002531771 | Metabolism               |
| 9.95E-05    | Metabolism               |
| 0.081358115 | Metabolism               |
| 0.829661016 | Metabolism               |
| 0.352095123 | TME                      |
| 0.457037584 | Proliferation/Metastasis |
| 3.35E-05    | Metabolism               |
| 0.002434851 | Proliferation/Metastasis |
| 0.007847644 | TME                      |
| 0.002328059 | Proliferation/Metastasis |
| 0.03080332  | Proliferation/Metastasis |
| 0.015323007 | TME                      |
| 9.57E-06    | TME                      |
| 4.72E-08    | Metabolism               |
| 0.047801308 | Metabolism               |
| 0.091836507 | Proliferation/Metastasis |
| 0.011480301 | Proliferation/Metastasis |
| 0.058274375 | Proliferation/Metastasis |
| 0.000245534 | Metabolism               |
| 0.048980714 | Metabolism               |
| 0.000180089 | Metabolism               |
| 6.34E-05    | Proliferation/Metastasis |
| 0.039360153 | TME                      |
| 0.001287887 | TME                      |
| 0.032336655 | Metabolism               |
| 0.843745279 | Proliferation/Metastasis |
| 0.001217826 | Metabolism               |
| 0.01157645  | TME                      |
| 0.065716333 | TME                      |
| 0.005449792 | TME                      |
| 0.016419759 | TME                      |
| 9.00E-05    | Metabolism               |
| 0.324540308 | TME                      |
| 4.41E-10    | Proliferation/Metastasis |
| 0.013840864 | TME                      |
| 4.50E-05    | Proliferation/Metastasis |
| 0.648175798 | Proliferation/Metastasis |

|             |                          |
|-------------|--------------------------|
| 0.003298655 | Metabolism               |
| 0.207400449 | Proliferation/Metastasis |
| 0.684218694 | TME                      |
| 0.134318111 | Metabolism               |
| 0.975022799 | TME                      |
| 0.025677714 | TME                      |
| 0.007937915 | TME                      |
| 0.512259228 | TME                      |
| 0.011093889 | TME                      |
| 0.000625576 | TME                      |
| 0.570063357 | Metabolism               |
| 0.002135422 | TME                      |
| 0.989106721 | Metabolism               |
| 0.816440488 | Metabolism               |
| 0.140300156 | Proliferation/Metastasis |
| 0.04946085  | Proliferation/Metastasis |
| 0.023504241 | Metabolism               |
| 0.092079137 | Metabolism               |
| 0.024223599 | Metabolism               |
| 0.06133656  | Metabolism               |
| 1.04E-10    | Proliferation/Metastasis |
| 0.202736176 | Proliferation/Metastasis |
| 0.139555944 | Metabolism               |
| 0.235538326 | Metabolism               |
| 0.954518984 | Metabolism               |
| 0.000943672 | TME                      |
| 4.33E-06    | Metabolism               |
| 0.799306096 | Metabolism               |
| 0.169121931 | Metabolism               |
| 0.023953155 | Metabolism               |
| 0.001416499 | Proliferation/Metastasis |
| 0.006329059 | Metabolism               |
| 0.536469532 | Metabolism               |
| 0.052326536 | Metabolism               |
| 0.896466013 | Metabolism               |
| 0.646697549 | Metabolism               |
| 0.373986639 | Metabolism               |
| 0.591681645 | Proliferation/Metastasis |
| 0.001587728 | Metabolism               |
| 0.003091747 | Metabolism               |
| 0.727743637 | Proliferation/Metastasis |
| 0.077107023 | Metabolism               |
| 0.174552566 | Metabolism               |

|             |                          |
|-------------|--------------------------|
| 0.085264018 | Metabolism               |
| 0.660035505 | Metabolism               |
| 0.030406641 | Metabolism               |
| 0.011167401 | Metabolism               |
| 0.020025671 | Metabolism               |
| 0.214420971 | Metabolism               |
| 0.26323934  | TME                      |
| 0.268389115 | TME                      |
| 0.94031138  | TME                      |
| 0.561664214 | TME                      |
| 0.036514468 | TME                      |
| 0.000672899 | Metabolism               |
| 0.572264431 | Metabolism               |
| 0.701380586 | Proliferation/Metastasis |
| 0.00080493  | Metabolism               |
| 0.00133061  | Proliferation/Metastasis |
| 0.004941296 | Metabolism               |
| 0.373645444 | TME                      |
| 9.16E-08    | Metabolism               |
| 0.00021869  | Metabolism               |
| 0.001655176 | Metabolism               |
| 0.355116009 | Metabolism               |
| 2.32E-05    | TME                      |
| 9.24E-05    | TME                      |
| 0.369970186 | Proliferation/Metastasis |
| 0.192016444 | Metabolism               |
| 0.353990109 | Proliferation/Metastasis |
| 0.301955573 | Proliferation/Metastasis |
| 0.088345232 | TME                      |
| 0.978020473 | TME                      |
| 0.180289503 | TME                      |
| 0.003512225 | TME                      |
| 0.431121914 | Metabolism               |
| 2.56E-06    | Proliferation/Metastasis |
| 0.00021812  | Metabolism               |
| 1.90E-05    | Metabolism               |
| 0.175577344 | Proliferation/Metastasis |
| 0.004029075 | Proliferation/Metastasis |
| 2.06E-05    | Metabolism               |
| 0.020671588 | Metabolism               |
| 0.926652498 | Metabolism               |
| 0.50530719  | Metabolism               |
| 0.181504506 | TME                      |

|             |                          |
|-------------|--------------------------|
| 0.04436773  | TME                      |
| 0.033893284 | TME                      |
| 0.122930266 | TME                      |
| 0.890400127 | TME                      |
| 0.220727557 | Metabolism               |
| 8.63E-13    | Metabolism               |
| 0.55741782  | Metabolism               |
| 5.28E-08    | Metabolism               |
| 0.59025696  | Metabolism               |
| 2.02E-12    | TME                      |
| 4.34E-05    | TME                      |
| 0.764914487 | TME                      |
| 0.231264432 | TME                      |
| 0.2277347   | TME                      |
| 0.00298797  | TME                      |
| 0.006393216 | TME                      |
| 0.001580333 | TME                      |
| 0.004178026 | TME                      |
| 0.571317825 | Proliferation/Metastasis |
| 4.37E-15    | Proliferation/Metastasis |
| 0.002173382 | Metabolism               |
| 0.632612193 | Metabolism               |
| 0.000229439 | TME                      |
| 0.223828652 | Metabolism               |
| 5.24E-13    | Metabolism               |
| 0.761558749 | TME                      |
| 3.37E-09    | Proliferation/Metastasis |
| 0.002172274 | Proliferation/Metastasis |
| 0.006272666 | TME                      |
| 1.29E-07    | Metabolism               |
| 5.88E-15    | Metabolism               |
| 0.172656598 | Proliferation/Metastasis |
| 2.50E-05    | Proliferation/Metastasis |
| 0.212595491 | TME                      |
| 0.006124651 | TME                      |
| 0.106996628 | TME                      |
| 0.828237841 | TME                      |
| 0.54052888  | Proliferation/Metastasis |
| 0.000131121 | TME                      |
| 0.665408508 | TME                      |
| 0.068267768 | Metabolism               |
| 0.000665896 | TME                      |
| 7.52E-05    | TME                      |

|             |                          |
|-------------|--------------------------|
| 0.004498048 | TME                      |
| 0.00102352  | TME                      |
| 0.223510143 | Metabolism               |
| 0.234084341 | Metabolism               |
| 1.80E-12    | Metabolism               |
| 3.44E-07    | TME                      |
| 4.31E-08    | Metabolism               |
| 0.140969655 | TME                      |
| 0.977168621 | TME                      |
| 0.143878734 | TME                      |
| 5.59E-06    | TME                      |
| 3.14E-06    | TME                      |
| 9.37E-07    | Metabolism               |
| 0.901384849 | Proliferation/Metastasis |
| 2.57E-12    | Metabolism               |
| 1.10E-06    | Proliferation/Metastasis |
| 3.54E-11    | Metabolism               |
| 7.59E-07    | Metabolism               |
| 5.35E-09    | Metabolism               |
| 2.91E-09    | Metabolism               |
| 0.039606422 | Metabolism               |
| 0.358598229 | Metabolism               |
| 0.985239269 | Metabolism               |
| 0.782965614 | Metabolism               |
| 0.910917427 | Metabolism               |
| 0.406887578 | Metabolism               |
| 0.590863263 | Metabolism               |
| 0.272342414 | Metabolism               |
| 0.000360298 | Metabolism               |
| 8.01E-08    | Metabolism               |
| 0.025454779 | TME                      |
| 1.30E-09    | Proliferation/Metastasis |
| 0.115288025 | Metabolism               |
| 0.068065517 | Proliferation/Metastasis |
| 0.016212721 | TME                      |
| 0.000564171 | Proliferation/Metastasis |
| 4.08E-08    | Proliferation/Metastasis |
| 0.725462228 | TME                      |
| 0.748652453 | TME                      |
| 6.97E-12    | Metabolism               |
| 6.17E-23    | Metabolism               |
| 0.825802559 | Proliferation/Metastasis |
| 0.161235278 | Proliferation/Metastasis |



|             |                          |
|-------------|--------------------------|
| 1.30E-07    | Proliferation/Metastasis |
| 0.00110294  | Metabolism               |
| 0.017031785 | Metabolism               |
| 0.663122787 | Metabolism               |
| 0.085158513 | Proliferation/Metastasis |
| 5.88E-09    | TME                      |
| 0.263805032 | TME                      |
| 0.029888313 | Metabolism               |
| 1.45E-11    | Proliferation/Metastasis |
| 3.57E-22    | Metabolism               |
| 0.522694957 | TME                      |
| 0.252969026 | TME                      |
| 0.015853779 | TME                      |
| 4.28E-11    | TME                      |
| 5.76E-10    | Metabolism               |
| 0.003894063 | TME                      |
| 1.58E-08    | Proliferation/Metastasis |
| 0.123575411 | TME                      |
| 0.006012633 | Proliferation/Metastasis |
| 0.066235774 | Proliferation/Metastasis |
| 2.10E-08    | Metabolism               |
| 0.000140487 | Proliferation/Metastasis |
| 0.07998969  | TME                      |
| 0.578521858 | Metabolism               |
| 0.900675847 | TME                      |
| 0.418951397 | TME                      |
| 0.208970088 | TME                      |
| 0.189920703 | TME                      |
| 0.13538395  | TME                      |
| 0.229370625 | TME                      |
| 3.49E-05    | Metabolism               |
| 0.0162596   | TME                      |
| 0.862644396 | Metabolism               |
| 0.005603934 | Metabolism               |
| 9.97E-08    | Proliferation/Metastasis |
| 0.015489053 | Proliferation/Metastasis |
| 0.008067463 | Metabolism               |
| 0.308595844 | Metabolism               |
| 0.000891283 | Metabolism               |
| 1.17E-14    | Metabolism               |
| 0.979404779 | Proliferation/Metastasis |
| 0.002356058 | Proliferation/Metastasis |
| 0.514028339 | Metabolism               |

|             |                          |
|-------------|--------------------------|
| 6.04E-07    | Metabolism               |
| 1.07E-06    | Metabolism               |
| 0.022502621 | TME                      |
| 1.86E-08    | Metabolism               |
| 0.000290927 | Metabolism               |
| 0.427630394 | Metabolism               |
| 0.003332102 | Metabolism               |
| 0.219989876 | Proliferation/Metastasis |
| 2.45E-05    | Metabolism               |
| 2.82E-05    | Metabolism               |
| 0.698597129 | Metabolism               |
| 3.33E-07    | Metabolism               |
| 1.51E-06    | Metabolism               |
| 0.000139689 | Metabolism               |
| 0.038797535 | Proliferation/Metastasis |
| 0.00026021  | Metabolism               |
| 1.14E-08    | Metabolism               |
| 1.33E-11    | Proliferation/Metastasis |
| 2.48E-10    | Metabolism               |
| 6.82E-08    | Metabolism               |
| 0.000458954 | Metabolism               |
| 2.83E-12    | Metabolism               |
| 0.009556062 | Metabolism               |
| 4.82E-06    | Metabolism               |
| 0.334030562 | Metabolism               |
| 1.10E-06    | Metabolism               |
| 0.16664627  | TME                      |
| 0.620142854 | TME                      |
| 0.224140799 | TME                      |
| 0.058701362 | TME                      |
| 0.000566624 | TME                      |
| 0.771994238 | Metabolism               |
| 2.31E-08    | Metabolism               |
| 3.82E-08    | Proliferation/Metastasis |
| 2.70E-11    | Metabolism               |
| 2.36E-08    | Proliferation/Metastasis |
| 0.009471585 | Metabolism               |
| 0.168967575 | TME                      |
| 1.11E-10    | Metabolism               |
| 1.63E-05    | Metabolism               |
| 0.049722739 | Metabolism               |
| 0.15724948  | Metabolism               |
| 0.002439797 | TME                      |

|             |                          |
|-------------|--------------------------|
| 0.000750899 | TME                      |
| 0.721764366 | Proliferation/Metastasis |
| 0.024018372 | Metabolism               |
| 0.163166095 | Proliferation/Metastasis |
| 0.000793155 | Proliferation/Metastasis |
| 5.54E-05    | TME                      |
| 7.98E-09    | TME                      |
| 4.56E-05    | TME                      |
| 1.43E-14    | TME                      |
| 5.52E-08    | Metabolism               |
| 2.50E-21    | Proliferation/Metastasis |
| 0.010695221 | Metabolism               |
| 1.27E-06    | Metabolism               |
| 1.80E-14    | Proliferation/Metastasis |
| 4.34E-12    | Proliferation/Metastasis |
| 0.015471601 | Metabolism               |
| 0.320964308 | Metabolism               |
| 0.052706052 | Metabolism               |
| 0.612680828 | Metabolism               |
| 1.33E-10    | TME                      |
| 0.997611082 | TME                      |
| 0.000464661 | TME                      |
| 3.39E-19    | TME                      |
| 0.034066448 | TME                      |
| 0.040675197 | Metabolism               |
| 3.09E-09    | Metabolism               |
| 0.44123211  | Metabolism               |
| 5.18E-16    | Metabolism               |
| 2.20E-05    | Metabolism               |
| 1.39E-06    | TME                      |
| 0.001261574 | TME                      |
| 0.35962934  | TME                      |
| 1.67E-08    | TME                      |
| 0.003472389 | TME                      |
| 4.20E-10    | TME                      |
| 1.38E-10    | TME                      |
| 8.65E-15    | TME                      |
| 2.36E-11    | TME                      |
| 1.25E-15    | Proliferation/Metastasis |
| 0.888917468 | Proliferation/Metastasis |
| 5.34E-14    | Metabolism               |
| 9.36E-16    | Metabolism               |
| 1.01E-12    | TME                      |

|             |                          |
|-------------|--------------------------|
| 0.016696231 | Metabolism               |
| 0.012967041 | Metabolism               |
| 0.407082472 | TME                      |
| 5.64E-15    | Proliferation/Metastasis |
| 3.58E-32    | Proliferation/Metastasis |
| 1.01E-06    | TME                      |
| 0.034431631 | Metabolism               |
| 4.70E-13    | Metabolism               |
| 3.35E-23    | Proliferation/Metastasis |
| 7.52E-15    | Proliferation/Metastasis |
| 9.10E-06    | TME                      |
| 0.07879283  | TME                      |
| 1.15E-10    | TME                      |
| 2.51E-06    | TME                      |
| 2.14E-17    | Proliferation/Metastasis |
| 0.000423063 | TME                      |
| 0.00156772  | TME                      |
| 0.888738154 | Metabolism               |
| 7.58E-06    | TME                      |
| 0.039143561 | TME                      |
| 2.49E-12    | TME                      |
| 0.002658135 | TME                      |
| 0.730306788 | Metabolism               |
| 0.851698936 | Metabolism               |
| 7.03E-07    | Metabolism               |
| 5.84E-06    | TME                      |
| 1.01E-09    | Metabolism               |
| 0.000128385 | TME                      |
| 0.00019572  | TME                      |
| 1.67E-14    | TME                      |
| 8.03E-14    | TME                      |
| 0.390237957 | TME                      |
| 1.52E-08    | Metabolism               |
| 6.75E-17    | Proliferation/Metastasis |
| 6.43E-09    | Metabolism               |
| 5.41E-12    | Proliferation/Metastasis |
| 3.57E-06    | Metabolism               |
| 9.78E-10    | Metabolism               |
| 0.851616378 | Metabolism               |
| 9.95E-05    | Metabolism               |
| 6.34E-07    | Metabolism               |
| 6.22E-08    | Metabolism               |
| 1.01E-10    | Metabolism               |

|             |                          |
|-------------|--------------------------|
| 0.295108089 | Metabolism               |
| 4.08E-18    | Metabolism               |
| 6.26E-09    | Metabolism               |
| 1.50E-12    | Metabolism               |
| 2.07E-07    | Metabolism               |
| 0.212220855 | Metabolism               |
| 2.27E-13    | Metabolism               |
| 0.684314731 | TME                      |
| 1.63E-17    | Proliferation/Metastasis |
| 5.85E-05    | Metabolism               |
| 0.809082025 | Proliferation/Metastasis |
| 2.81E-11    | TME                      |
| 0.256693543 | Proliferation/Metastasis |
| 0.09326644  | Proliferation/Metastasis |
| 0.111656973 | TME                      |
| 0.334616281 | TME                      |
| 0.07761512  | Metabolism               |
| 8.23E-06    | Metabolism               |
| 1.45E-12    | Proliferation/Metastasis |
| 3.97E-25    | Proliferation/Metastasis |
| 0.154263559 | Proliferation/Metastasis |
| 0.001974854 | Metabolism               |
| 0.396250907 | Metabolism               |
| 0.384324209 | Metabolism               |
| 1.99E-07    | Proliferation/Metastasis |
| 0.030386721 | TME                      |
| 0.351401138 | TME                      |
| 8.07E-08    | Metabolism               |
| 0.00819026  | Proliferation/Metastasis |
| 0.000647917 | Metabolism               |
| 6.07E-07    | TME                      |
| 0.004362419 | TME                      |
| 3.72E-07    | TME                      |
| 5.82E-05    | TME                      |
| 0.009445982 | Metabolism               |
| 3.13E-10    | TME                      |
| 0.711238722 | Proliferation/Metastasis |
| 0.06212566  | TME                      |
| 0.308699021 | Proliferation/Metastasis |
| 1.18E-20    | Proliferation/Metastasis |
| 7.21E-05    | Metabolism               |
| 4.36E-28    | Proliferation/Metastasis |
| 0.006810515 | TME                      |

|             |                          |
|-------------|--------------------------|
| 0.080821598 | Metabolism               |
| 3.40E-11    | TME                      |
| 0.019873005 | TME                      |
| 0.010257801 | TME                      |
| 1.40E-07    | TME                      |
| 7.41E-15    | TME                      |
| 1.42E-09    | TME                      |
| 2.34E-09    | Metabolism               |
| 0.163221436 | TME                      |
| 7.44E-07    | Metabolism               |
| 0.039263981 | Metabolism               |
| 0.077933258 | Proliferation/Metastasis |
| 7.43E-19    | Proliferation/Metastasis |
| 5.35E-28    | Metabolism               |
| 3.46E-12    | Metabolism               |
| 4.92E-06    | Metabolism               |
| 1.11E-15    | Metabolism               |
| 3.55E-06    | Proliferation/Metastasis |
| 2.02E-06    | Proliferation/Metastasis |
| 4.05E-06    | Metabolism               |
| 0.000348194 | Metabolism               |
| 1.02E-17    | Metabolism               |
| 0.000234553 | TME                      |
| 0.002167391 | Metabolism               |
| 7.93E-10    | Metabolism               |
| 0.003232589 | Metabolism               |
| 0.000440342 | Metabolism               |
| 1.41E-15    | Proliferation/Metastasis |
| 1.37E-11    | Metabolism               |
| 0.04201848  | Metabolism               |
| 0.136989329 | Metabolism               |
| 7.41E-32    | Metabolism               |
| 3.19E-27    | Metabolism               |
| 2.70E-05    | Metabolism               |
| 3.51E-08    | Proliferation/Metastasis |
| 0.000270287 | Metabolism               |
| 1.88E-06    | Metabolism               |
| 4.27E-12    | Proliferation/Metastasis |
| 0.014534666 | Metabolism               |
| 5.38E-21    | Metabolism               |
| 1.41E-05    | Metabolism               |
| 2.98E-05    | Metabolism               |
| 0.001733467 | Metabolism               |

|             |                          |
|-------------|--------------------------|
| 1.51E-05    | Metabolism               |
| 0.705295848 | Metabolism               |
| 2.02E-09    | Metabolism               |
| 2.92E-10    | TME                      |
| 0.000395085 | TME                      |
| 7.57E-05    | TME                      |
| 4.99E-08    | TME                      |
| 1.24E-11    | TME                      |
| 0.011150881 | Metabolism               |
| 1.01E-14    | Metabolism               |
| 2.36E-27    | Proliferation/Metastasis |
| 0.000630858 | Metabolism               |
| 0.058766182 | Proliferation/Metastasis |
| 0.329412854 | Metabolism               |
| 0.060490832 | TME                      |
| 0.9133879   | Metabolism               |
| 0.00549598  | Metabolism               |
| 2.33E-06    | Metabolism               |
| 0.001232328 | Metabolism               |
| 4.09E-10    | TME                      |
| 0.186866278 | TME                      |
| 0.004353173 | Proliferation/Metastasis |
| 0.336708189 | Metabolism               |
| 0.021758017 | Proliferation/Metastasis |
| 5.59E-20    | Proliferation/Metastasis |
| 0.001217791 | TME                      |
| 1.78E-05    | TME                      |
| 0.219994877 | TME                      |
| 6.90E-05    | TME                      |
| 1.71E-05    | Metabolism               |
| 1.71E-11    | Proliferation/Metastasis |
| 1.64E-07    | Metabolism               |
| 6.23E-12    | Metabolism               |
| 0.014164171 | Proliferation/Metastasis |
| 0.003649904 | Proliferation/Metastasis |
| 4.70E-08    | Metabolism               |
| 1.39E-05    | Metabolism               |
| 0.001995127 | Metabolism               |
| 0.000451432 | Metabolism               |
| 0.000573274 | TME                      |
| 0.485250795 | TME                      |
| 0.065973437 | TME                      |
| 7.22E-06    | TME                      |

|             |                          |
|-------------|--------------------------|
| 0.594715055 | TME                      |
| 0.324857986 | Metabolism               |
| 3.73E-08    | Metabolism               |
| 0.549239083 | Metabolism               |
| 7.86E-12    | Metabolism               |
| 0.039133975 | Metabolism               |
| 6.01E-05    | TME                      |
| 0.04335796  | TME                      |
| 0.080367008 | TME                      |
| 6.01E-05    | TME                      |
| 0.194542838 | TME                      |
| 0.022145868 | TME                      |
| 0.015071487 | TME                      |
| 6.85E-06    | TME                      |
| 0.013878726 | TME                      |
| 0.229025257 | Proliferation/Metastasis |
| 2.00E-06    | Proliferation/Metastasis |
| 4.35E-06    | Metabolism               |
| 2.64E-05    | Metabolism               |
| 0.000656681 | TME                      |
| 0.002309422 | Metabolism               |
| 0.001304903 | Metabolism               |
| 0.373343883 | TME                      |
| 1.16E-11    | Proliferation/Metastasis |
| 1.28E-07    | Proliferation/Metastasis |
| 1.33E-08    | TME                      |
| 5.57E-07    | Metabolism               |
| 7.55E-20    | Metabolism               |
| 0.000428578 | Proliferation/Metastasis |
| 4.30E-06    | Proliferation/Metastasis |
| 0.152077656 | TME                      |
| 0.809671204 | TME                      |
| 0.016966748 | TME                      |
| 0.660907025 | TME                      |
| 0.003868158 | Proliferation/Metastasis |
| 2.05E-05    | TME                      |
| 0.014030285 | TME                      |
| 0.024069405 | Metabolism               |
| 0.450772563 | TME                      |
| 0.648844702 | TME                      |
| 9.74E-05    | TME                      |
| 0.517033114 | TME                      |
| 0.057770974 | Metabolism               |



|             |                          |
|-------------|--------------------------|
| 0.407475851 | Metabolism               |
| 3.57E-08    | Metabolism               |
| 0.001278325 | TME                      |
| 3.28E-10    | Metabolism               |
| 0.01155789  | TME                      |
| 0.007289801 | TME                      |
| 0.000739728 | TME                      |
| 3.39E-08    | TME                      |
| 0.235683191 | TME                      |
| 7.35E-17    | Metabolism               |
| 0.091876582 | Proliferation/Metastasis |
| 3.74E-16    | Metabolism               |
| 1.22E-06    | Proliferation/Metastasis |
| 1.83E-13    | Metabolism               |
| 4.08E-14    | Metabolism               |
| 1.20E-06    | Metabolism               |
| 1.54E-10    | Metabolism               |
| 2.65E-09    | Metabolism               |
| 0.503948442 | Metabolism               |
| 0.061294193 | Metabolism               |
| 0.411429421 | Metabolism               |
| 0.083798291 | Metabolism               |
| 0.89123481  | Metabolism               |
| 0.580941653 | Metabolism               |
| 0.765326231 | Metabolism               |
| 6.84E-06    | Metabolism               |
| 2.60E-10    | Metabolism               |
| 0.992425837 | TME                      |
| 2.02E-13    | Proliferation/Metastasis |
| 0.378396106 | Metabolism               |
| 0.120031322 | Proliferation/Metastasis |
| 0.02018929  | TME                      |
| 0.89914477  | Proliferation/Metastasis |
| 0.079593018 | Proliferation/Metastasis |
| 0.001059517 | TME                      |
| 0.001494952 | TME                      |
| 9.17E-08    | Metabolism               |
| 7.83E-14    | Metabolism               |
| 0.009422917 | Proliferation/Metastasis |
| 5.70E-06    | Proliferation/Metastasis |
| 0.015477884 | Proliferation/Metastasis |
| 3.21E-05    | Metabolism               |
| 0.601186993 | Metabolism               |

|             |                          |
|-------------|--------------------------|
| 0.104492831 | Metabolism               |
| 0.522028788 | Proliferation/Metastasis |
| 0.060162725 | TME                      |
| 0.512060377 | TME                      |
| 0.721757441 | Metabolism               |
| 0.000146206 | Proliferation/Metastasis |
| 8.89E-15    | Metabolism               |
| 0.109949826 | TME                      |
| 0.000531474 | TME                      |
| 0.0109693   | TME                      |
| 0.000156357 | TME                      |
| 2.57E-10    | Metabolism               |
| 0.001435065 | TME                      |
| 2.60E-06    | Proliferation/Metastasis |
| 0.127774651 | TME                      |
| 0.000237584 | Proliferation/Metastasis |
| 1.03E-07    | Proliferation/Metastasis |
| 2.31E-09    | Metabolism               |
| 5.27E-10    | Proliferation/Metastasis |
| 0.45322253  | TME                      |
| 0.021669499 | Metabolism               |
| 7.16E-07    | TME                      |
| 0.593047399 | TME                      |
| 0.812361639 | TME                      |
| 0.00263576  | TME                      |
| 0.007654871 | TME                      |
| 0.116649873 | TME                      |
| 2.75E-08    | Metabolism               |
| 0.074221921 | TME                      |
| 0.002656436 | Metabolism               |
| 0.595279071 | Metabolism               |
| 0.090832615 | Proliferation/Metastasis |
| 6.95E-05    | Proliferation/Metastasis |
| 3.15E-06    | Metabolism               |
| 0.204781799 | Metabolism               |
| 0.151409237 | Metabolism               |
| 1.40E-16    | Metabolism               |
| 0.914449064 | Proliferation/Metastasis |
| 0.133137214 | Proliferation/Metastasis |
| 0.012086119 | Metabolism               |
| 6.47E-12    | Metabolism               |
| 4.82E-17    | Metabolism               |
| 0.038265792 | TME                      |

|             |                          |
|-------------|--------------------------|
| 1.98E-12    | Metabolism               |
| 1.13E-06    | Metabolism               |
| 0.004336059 | Metabolism               |
| 6.97E-09    | Metabolism               |
| 0.012612614 | Proliferation/Metastasis |
| 5.87E-17    | Metabolism               |
| 0.006829058 | Metabolism               |
| 0.645649734 | Metabolism               |
| 2.66E-16    | Metabolism               |
| 3.75E-16    | Metabolism               |
| 1.73E-05    | Metabolism               |
| 0.000165242 | Proliferation/Metastasis |
| 2.15E-12    | Metabolism               |
| 6.87E-09    | Metabolism               |
| 3.88E-08    | Proliferation/Metastasis |
| 0.726426476 | Metabolism               |
| 6.78E-17    | Metabolism               |
| 0.002588294 | Metabolism               |
| 1.88E-06    | Metabolism               |
| 3.19E-11    | Metabolism               |
| 1.84E-10    | Metabolism               |
| 0.218479487 | Metabolism               |
| 5.23E-07    | Metabolism               |
| 0.004839498 | TME                      |
| 0.015512724 | TME                      |
| 0.221922665 | TME                      |
| 0.003960114 | TME                      |
| 0.000954962 | TME                      |
| 0.071002576 | Metabolism               |
| 5.24E-16    | Metabolism               |
| 1.84E-13    | Proliferation/Metastasis |
| 6.41E-12    | Metabolism               |
| 0.185789294 | Proliferation/Metastasis |
| 0.003961342 | Metabolism               |
| 0.006602221 | TME                      |
| 2.31E-07    | Metabolism               |
| 1.36E-08    | Metabolism               |
| 6.15E-09    | Metabolism               |
| 0.030050304 | Metabolism               |
| 0.027377793 | TME                      |
| 0.921711999 | TME                      |
| 0.123626945 | Proliferation/Metastasis |
| 0.096044748 | Metabolism               |

|             |                          |
|-------------|--------------------------|
| 0.065625712 | Proliferation/Metastasis |
| 3.71E-08    | Proliferation/Metastasis |
| 0.640186548 | TME                      |
| 0.257501595 | TME                      |
| 0.297308843 | TME                      |
| 0.018621141 | TME                      |
| 0.002504092 | Metabolism               |
| 0.161836964 | Proliferation/Metastasis |
| 1.42E-12    | Metabolism               |
| 9.79E-06    | Metabolism               |
| 8.03E-10    | Proliferation/Metastasis |
| 2.00E-13    | Proliferation/Metastasis |
| 1.28E-16    | Metabolism               |
| 4.78E-09    | Metabolism               |
| 3.22E-06    | Metabolism               |
| 5.31E-08    | Metabolism               |
| 0.036721041 | TME                      |
| 3.45E-06    | TME                      |
| 0.303568845 | TME                      |
| 0.00506966  | TME                      |
| 1.30E-10    | TME                      |
| 0.000358954 | Metabolism               |
| 0.607656469 | Metabolism               |
| 0.001629892 | Metabolism               |
| 0.461594196 | Metabolism               |
| 0.145334763 | Metabolism               |
| 2.72E-06    | TME                      |
| 7.47E-07    | TME                      |
| 6.02E-08    | TME                      |
| 0.885901503 | TME                      |
| 0.664895307 | TME                      |
| 6.31E-07    | TME                      |
| 3.12E-06    | TME                      |
| 0.527855419 | TME                      |
| 0.000329814 | TME                      |
| 1.34E-10    | Proliferation/Metastasis |
| 1.21E-05    | Proliferation/Metastasis |
| 0.043780435 | Metabolism               |
| 0.661097249 | Metabolism               |
| 3.02E-05    | TME                      |
| 0.001309831 | Metabolism               |
| 0.484218193 | Metabolism               |
| 0.017788803 | TME                      |

|             |                          |
|-------------|--------------------------|
| 0.066871054 | Proliferation/Metastasis |
| 0.000195526 | Proliferation/Metastasis |
| 0.003335496 | TME                      |
| 1.76E-07    | Metabolism               |
| 0.002096986 | Metabolism               |
| 2.62E-07    | Proliferation/Metastasis |
| 1.91E-06    | Proliferation/Metastasis |
| 0.001217295 | TME                      |
| 0.15078863  | TME                      |
| 0.007706972 | TME                      |
| 1.06E-07    | TME                      |
| 0.006138552 | Proliferation/Metastasis |
| 0.928300523 | TME                      |
| 0.002197087 | TME                      |
| 5.13E-09    | Metabolism               |
| 0.815629636 | TME                      |
| 0.080847067 | TME                      |
| 0.110706444 | TME                      |
| 0.147382796 | TME                      |
| 0.898280187 | Metabolism               |
| 0.527838961 | Metabolism               |
| 0.601258217 | Metabolism               |
| 1.26E-05    | TME                      |
| 0.070835715 | Metabolism               |
| 0.15828689  | TME                      |
| 0.046127103 | TME                      |
| 0.026045853 | TME                      |
| 0.250538227 | TME                      |
| 9.21E-05    | TME                      |
| 1.60E-07    | Metabolism               |
| 3.89E-10    | Proliferation/Metastasis |
| 0.039282912 | Metabolism               |
| 0.019494131 | Proliferation/Metastasis |
| 5.61E-07    | Metabolism               |
| 0.009109386 | Metabolism               |
| 7.18E-10    | Metabolism               |
| 0.000460618 | Metabolism               |
| 9.87E-05    | Metabolism               |
| 1.92E-08    | Metabolism               |
| 0.008907183 | Metabolism               |
| 0.0320602   | Metabolism               |
| 6.62E-08    | Metabolism               |
| 6.00E-07    | Metabolism               |

|             |                          |
|-------------|--------------------------|
| 6.31E-07    | Metabolism               |
| 5.24E-13    | Metabolism               |
| 0.103703204 | Metabolism               |
| 0.428903637 | Metabolism               |
| 0.000179098 | TME                      |
| 0.218502716 | Proliferation/Metastasis |
| 2.73E-07    | Metabolism               |
| 1.36E-12    | Proliferation/Metastasis |
| 6.90E-07    | TME                      |
| 4.24E-13    | Proliferation/Metastasis |
| 2.22E-06    | Proliferation/Metastasis |
| 1.40E-07    | TME                      |
| 2.13E-13    | TME                      |
| 2.20E-06    | Metabolism               |
| 0.95225125  | Metabolism               |
| 0.007035828 | Proliferation/Metastasis |
| 0.000857228 | Proliferation/Metastasis |
| 5.49E-06    | Proliferation/Metastasis |
| 9.83E-08    | Metabolism               |
| 0.323354012 | Metabolism               |
| 4.05E-07    | Metabolism               |
| 6.97E-11    | Proliferation/Metastasis |
| 4.14E-07    | TME                      |
| 3.52E-10    | TME                      |
| 7.93E-06    | Metabolism               |
| 0.010327779 | Proliferation/Metastasis |
| 0.049660109 | Metabolism               |
| 0.000150101 | TME                      |
| 3.21E-07    | TME                      |
| 1.98E-05    | TME                      |
| 4.42E-05    | TME                      |
| 2.05E-09    | Metabolism               |
| 1.33E-06    | TME                      |
| 7.17E-13    | Proliferation/Metastasis |
| 9.79E-06    | TME                      |
| 0.001366509 | Proliferation/Metastasis |
| 0.423508764 | Proliferation/Metastasis |
| 0.37259408  | Metabolism               |
| 0.004696017 | Proliferation/Metastasis |
| 0.154533803 | TME                      |
| 0.000440679 | Metabolism               |
| 0.34819129  | TME                      |
| 0.000747235 | TME                      |

|             |                          |
|-------------|--------------------------|
| 6.15E-06    | TME                      |
| 0.709902811 | TME                      |
| 2.46E-07    | TME                      |
| 2.20E-07    | TME                      |
| 0.221959306 | Metabolism               |
| 2.00E-10    | TME                      |
| 0.896022634 | Metabolism               |
| 0.968756454 | Metabolism               |
| 7.34E-06    | Proliferation/Metastasis |
| 0.000160351 | Proliferation/Metastasis |
| 0.000104429 | Metabolism               |
| 2.57E-05    | Metabolism               |
| 4.68E-08    | Metabolism               |
| 0.450238027 | Metabolism               |
| 5.74E-13    | Proliferation/Metastasis |
| 0.000847394 | Proliferation/Metastasis |
| 0.068692662 | Metabolism               |
| 0.008118764 | Metabolism               |
| 0.234581726 | Metabolism               |
| 6.29E-06    | TME                      |
| 1.17E-11    | Metabolism               |
| 0.278423529 | Metabolism               |
| 0.835881357 | Metabolism               |
| 0.08116243  | Metabolism               |
| 7.70E-08    | Proliferation/Metastasis |
| 1.11E-05    | Metabolism               |
| 0.275480166 | Metabolism               |
| 0.272294076 | Metabolism               |
| 0.447631984 | Metabolism               |
| 0.134769963 | Metabolism               |
| 0.381821004 | Metabolism               |
| 0.445350522 | Proliferation/Metastasis |
| 4.96E-06    | Metabolism               |
| 0.014531687 | Metabolism               |
| 0.021554081 | Proliferation/Metastasis |
| 0.202008692 | Metabolism               |
| 0.861814424 | Metabolism               |
| 0.650312585 | Metabolism               |
| 0.781253558 | Metabolism               |
| 0.000167422 | Metabolism               |
| 2.63E-05    | Metabolism               |
| 1.58E-05    | Metabolism               |
| 0.070391917 | Metabolism               |

|             |                          |
|-------------|--------------------------|
| 0.057570009 | TME                      |
| 0.041274837 | TME                      |
| 0.854120822 | TME                      |
| 0.129051389 | TME                      |
| 8.81E-06    | TME                      |
| 3.14E-08    | Metabolism               |
| 0.737098576 | Metabolism               |
| 0.329839031 | Proliferation/Metastasis |
| 8.05E-06    | Metabolism               |
| 1.10E-09    | Proliferation/Metastasis |
| 8.69E-09    | Metabolism               |
| 0.37364789  | TME                      |
| 4.62E-12    | Metabolism               |
| 9.53E-05    | Metabolism               |
| 2.38E-09    | Metabolism               |
| 0.229716696 | Metabolism               |
| 6.19E-10    | TME                      |
| 2.44E-08    | TME                      |
| 0.212551997 | Proliferation/Metastasis |
| 0.081007838 | Metabolism               |
| 0.15705112  | Proliferation/Metastasis |
| 0.311388587 | Proliferation/Metastasis |
| 0.946161527 | TME                      |
| 0.028926399 | TME                      |
| 0.033035981 | TME                      |
| 0.00426085  | TME                      |
| 0.669737584 | Metabolism               |
| 1.07E-05    | Proliferation/Metastasis |
| 0.501207637 | Metabolism               |
| 0.038352259 | Metabolism               |
| 0.009540901 | Proliferation/Metastasis |
| 0.064311735 | Proliferation/Metastasis |
| 0.370943767 | Metabolism               |
| 0.105770407 | Metabolism               |
| 0.066043152 | Metabolism               |
| 0.295814857 | Metabolism               |
| 0.023596581 | TME                      |
| 0.609463502 | TME                      |
| 0.092607868 | TME                      |
| 0.003655327 | TME                      |
| 0.002911214 | TME                      |
| 0.000465456 | Metabolism               |
| 0.053788383 | Metabolism               |



|             |                          |
|-------------|--------------------------|
| 0.310829861 | Metabolism               |
| 0.063895271 | Metabolism               |
| 0.21619111  | Metabolism               |
| 0.034462312 | TME                      |
| 0.274746205 | TME                      |
| 0.770357812 | TME                      |
| 0.041643795 | TME                      |
| 0.067299058 | TME                      |
| 0.024770466 | TME                      |
| 0.019677135 | TME                      |
| 0.00301247  | TME                      |
| 0.008582409 | TME                      |
| 0.000803068 | Proliferation/Metastasis |
| 0.600203986 | Proliferation/Metastasis |
| 0.272179593 | Metabolism               |
| 0.059986461 | Metabolism               |
| 0.013610547 | TME                      |
| 0.745580564 | Metabolism               |
| 0.313323416 | Metabolism               |
| 0.462470106 | TME                      |
| 0.001539821 | Proliferation/Metastasis |
| 0.002257323 | Proliferation/Metastasis |
| 0.164590059 | TME                      |
| 0.214237588 | Metabolism               |
| 0.110498568 | Metabolism               |
| 0.000386449 | Proliferation/Metastasis |
| 0.018557794 | Proliferation/Metastasis |
| 0.144354748 | TME                      |
| 0.307492871 | TME                      |
| 0.038460235 | TME                      |
| 0.022192276 | TME                      |
| 0.001032869 | Proliferation/Metastasis |
| 0.589228294 | TME                      |
| 0.187817061 | TME                      |
| 0.890439264 | Metabolism               |
| 0.036054206 | TME                      |
| 0.373632543 | TME                      |
| 0.004946813 | TME                      |
| 0.006511347 | TME                      |
| 0.008335539 | Metabolism               |
| 0.372298518 | Metabolism               |
| 0.686655199 | Metabolism               |
| 0.242572753 | TME                      |

|             |                          |
|-------------|--------------------------|
| 0.464256306 | Metabolism               |
| 0.217600889 | TME                      |
| 0.402974191 | TME                      |
| 0.008600238 | TME                      |
| 0.002487517 | TME                      |
| 0.993001609 | TME                      |
| 0.063381182 | Metabolism               |
| 0.000642226 | Proliferation/Metastasis |
| 0.003230917 | Metabolism               |
| 0.046993212 | Proliferation/Metastasis |
| 0.299288202 | Metabolism               |
| 0.223133409 | Metabolism               |
| 0.788350291 | Metabolism               |
| 0.869724777 | Metabolism               |
| 0.168902332 | Metabolism               |
| 0.34696089  | Metabolism               |
| 0.575356349 | Metabolism               |
| 0.037945753 | Metabolism               |
| 0.105813783 | Metabolism               |
| 0.881096671 | Metabolism               |
| 0.529272347 | Metabolism               |
| 0.436323753 | Metabolism               |
| 0.353591699 | Metabolism               |
| 0.18603612  | Metabolism               |
| 0.756165809 | TME                      |
| 0.020476968 | Proliferation/Metastasis |
| 0.001099291 | Metabolism               |
| 0.544979828 | Proliferation/Metastasis |
| 0.017100564 | TME                      |
| 0.685242339 | Proliferation/Metastasis |
| 0.87179821  | Proliferation/Metastasis |
| 0.511907195 | TME                      |
| 0.890157703 | TME                      |
| 0.306101467 | Metabolism               |
| 0.221155142 | Metabolism               |
| 0.000566183 | Proliferation/Metastasis |
| 0.000488767 | Proliferation/Metastasis |
| 0.514871949 | Proliferation/Metastasis |
| 0.519233683 | Metabolism               |
| 0.006044647 | Metabolism               |
| 0.020130787 | Metabolism               |
| 0.773090981 | Proliferation/Metastasis |
| 0.720579008 | TME                      |

|             |                          |
|-------------|--------------------------|
| 0.862994338 | TME                      |
| 0.000420634 | Metabolism               |
| 0.141048168 | Proliferation/Metastasis |
| 0.403414555 | Metabolism               |
| 0.054406039 | TME                      |
| 0.298915728 | TME                      |
| 0.155568656 | TME                      |
| 0.141495879 | TME                      |
| 0.63985219  | Metabolism               |
| 0.036661699 | TME                      |
| 0.268812733 | Proliferation/Metastasis |
| 0.236880983 | TME                      |
| 0.142707619 | Proliferation/Metastasis |
| 0.000281674 | Proliferation/Metastasis |
| 0.073624189 | Metabolism               |
| 0.000470109 | Proliferation/Metastasis |
| 0.121611535 | TME                      |
| 0.398515711 | Metabolism               |
| 0.031479016 | TME                      |
| 0.653151158 | TME                      |
| 0.247795625 | TME                      |
| 0.007079745 | TME                      |
| 0.000237142 | TME                      |
| 0.010126339 | TME                      |
| 0.006158111 | Metabolism               |
| 0.353790144 | TME                      |
| 0.998665607 | Metabolism               |
| 0.108096599 | Metabolism               |
| 0.725677117 | Proliferation/Metastasis |
| 0.005170738 | Proliferation/Metastasis |
| 0.001807725 | Metabolism               |
| 0.946406037 | Metabolism               |
| 0.007881651 | Metabolism               |
| 0.023061956 | Metabolism               |
| 0.287732046 | Proliferation/Metastasis |
| 0.002608231 | Proliferation/Metastasis |
| 0.125255108 | Metabolism               |
| 0.25354994  | Metabolism               |
| 0.000573406 | Metabolism               |
| 0.159047924 | TME                      |
| 0.654093165 | Metabolism               |
| 0.594240585 | Metabolism               |
| 0.097999707 | Metabolism               |

|             |                          |
|-------------|--------------------------|
| 0.028985354 | Metabolism               |
| 2.32E-05    | Proliferation/Metastasis |
| 0.135229427 | Metabolism               |
| 0.139213927 | Metabolism               |
| 0.387010713 | Metabolism               |
| 0.005921411 | Metabolism               |
| 0.002601927 | Metabolism               |
| 0.877506901 | Metabolism               |
| 0.000448724 | Proliferation/Metastasis |
| 0.741903293 | Metabolism               |
| 0.252831081 | Metabolism               |
| 0.004060955 | Proliferation/Metastasis |
| 0.04550484  | Metabolism               |
| 0.010557666 | Metabolism               |
| 0.013564519 | Metabolism               |
| 0.420755924 | Metabolism               |
| 0.234917016 | Metabolism               |
| 0.625745263 | Metabolism               |
| 0.019103157 | Metabolism               |
| 0.182541465 | Metabolism               |
| 0.009501472 | TME                      |
| 0.027902647 | TME                      |
| 0.12601299  | TME                      |
| 0.009049817 | TME                      |
| 0.008704876 | TME                      |
| 0.830150538 | Metabolism               |
| 0.020033971 | Metabolism               |
| 0.020778606 | Proliferation/Metastasis |
| 0.848574577 | Metabolism               |
| 0.448566127 | Proliferation/Metastasis |
| 0.435305783 | Metabolism               |
| 0.557426285 | TME                      |
| 0.295203889 | Metabolism               |
| 0.102829934 | Metabolism               |
| 0.024250196 | Metabolism               |
| 0.250240358 | Metabolism               |
| 0.310127145 | TME                      |
| 0.186041627 | TME                      |
| 0.653808138 | Proliferation/Metastasis |
| 0.963235226 | Metabolism               |
| 0.048911533 | Proliferation/Metastasis |
| 0.001455602 | Proliferation/Metastasis |
| 3.78E-08    | TME                      |

|             |                          |
|-------------|--------------------------|
| 0.000843129 | TME                      |
| 0.020151757 | TME                      |
| 0.000952356 | TME                      |
| 0.760032715 | Metabolism               |
| 0.847845402 | Proliferation/Metastasis |
| 1.53E-05    | Metabolism               |
| 0.03888585  | Metabolism               |
| 0.017732559 | Proliferation/Metastasis |
| 8.16E-15    | Proliferation/Metastasis |
| 3.07E-22    | Metabolism               |
| 0.007897547 | Metabolism               |
| 1.03E-08    | Metabolism               |
| 0.214820813 | Metabolism               |
| 0.008730338 | TME                      |
| 3.66E-20    | TME                      |
| 0.06105785  | TME                      |
| 0.001703096 | TME                      |
| 1.09E-37    | TME                      |
| 0.620045853 | Metabolism               |
| 0.615277914 | Metabolism               |
| 0.71077637  | Metabolism               |
| 8.45E-05    | Metabolism               |
| 2.09E-07    | Metabolism               |
| 8.45E-08    | TME                      |
| 0.005714175 | TME                      |
| 4.15E-10    | TME                      |
| 3.09E-05    | TME                      |
| 0.088371612 | TME                      |
| 0.005160988 | TME                      |
| 0.008749097 | TME                      |
| 5.51E-07    | TME                      |
| 0.000471144 | TME                      |
| 6.07E-06    | Proliferation/Metastasis |
| 5.78E-16    | Proliferation/Metastasis |
| 0.000437189 | Metabolism               |
| 0.140198129 | Metabolism               |
| 5.37E-06    | TME                      |
| 0.937032213 | Metabolism               |
| 0.403863702 | Metabolism               |
| 5.61E-07    | TME                      |
| 0.42695024  | Proliferation/Metastasis |
| 9.79E-05    | Proliferation/Metastasis |
| 0.000864942 | TME                      |

|             |                          |
|-------------|--------------------------|
| 1.58E-07    | Metabolism               |
| 1.98E-12    | Metabolism               |
| 6.25E-07    | Proliferation/Metastasis |
| 1.55E-11    | Proliferation/Metastasis |
| 0.061000411 | TME                      |
| 4.56E-08    | TME                      |
| 0.000959518 | TME                      |
| 0.02074357  | TME                      |
| 4.77E-06    | Proliferation/Metastasis |
| 0.008175687 | TME                      |
| 3.55E-08    | TME                      |
| 1.51E-11    | Metabolism               |
| 0.000236252 | TME                      |
| 3.72E-06    | TME                      |
| 0.000583645 | TME                      |
| 0.732250767 | TME                      |
| 0.092192749 | Metabolism               |
| 0.264168201 | Metabolism               |
| 0.006131487 | Metabolism               |
| 7.01E-07    | TME                      |
| 0.005622479 | Metabolism               |
| 5.84E-05    | TME                      |
| 0.932197772 | TME                      |
| 1.10E-05    | TME                      |
| 8.68E-08    | TME                      |
| 0.455895308 | TME                      |
| 0.018221547 | Metabolism               |
| 2.79E-09    | Proliferation/Metastasis |
| 0.002298301 | Metabolism               |
| 0.018555086 | Proliferation/Metastasis |
| 0.045601981 | Metabolism               |
| 2.45E-05    | Metabolism               |
| 6.36E-11    | Metabolism               |
| 0.654342693 | Metabolism               |
| 0.553018574 | Metabolism               |
| 2.94E-07    | Metabolism               |
| 0.017064561 | Metabolism               |
| 0.017949519 | Metabolism               |
| 8.65E-08    | Metabolism               |
| 0.000286269 | Metabolism               |
| 2.95E-18    | Metabolism               |
| 5.85E-09    | Metabolism               |
| 2.86E-09    | Metabolism               |

|             |                          |
|-------------|--------------------------|
| 0.024532828 | Metabolism               |
| 0.004933268 | TME                      |
| 0.959807432 | Proliferation/Metastasis |
| 2.04E-05    | Metabolism               |
| 1.47E-07    | Proliferation/Metastasis |
| 0.000258061 | TME                      |
| 6.42E-19    | Proliferation/Metastasis |
| 1.27E-11    | Proliferation/Metastasis |
| 0.0018086   | TME                      |
| 7.15E-13    | TME                      |
| 0.005092906 | Metabolism               |
| 0.399286387 | Metabolism               |
| 0.80712526  | Proliferation/Metastasis |
| 0.00043865  | Proliferation/Metastasis |
| 1.76E-16    | Proliferation/Metastasis |
| 1.72E-13    | Metabolism               |
| 0.062494347 | Metabolism               |
| 1.64E-13    | Metabolism               |
| 0.000327132 | Proliferation/Metastasis |
| 0.013868721 | TME                      |
| 0.003745578 | TME                      |
| 0.704383169 | Metabolism               |
| 1.97E-10    | Proliferation/Metastasis |
| 0.627209439 | Metabolism               |
| 0.531590365 | TME                      |
| 0.085872912 | TME                      |
| 0.000349652 | TME                      |
| 2.82E-08    | TME                      |
| 1.74E-11    | Metabolism               |
| 0.00025295  | TME                      |
| 5.63E-06    | Proliferation/Metastasis |
| 6.76E-17    | TME                      |
| 0.271215765 | Proliferation/Metastasis |
| 0.106156996 | Proliferation/Metastasis |
| 0.682418706 | Metabolism               |
| 0.000539152 | Proliferation/Metastasis |
| 0.000637562 | TME                      |
| 2.11E-07    | Metabolism               |
| 0.000679337 | TME                      |
| 0.01357553  | TME                      |
| 0.012781066 | TME                      |
| 3.44E-06    | TME                      |
| 0.750952261 | TME                      |

|             |                          |
|-------------|--------------------------|
| 0.004148953 | TME                      |
| 1.34E-05    | Metabolism               |
| 3.67E-21    | TME                      |
| 1.64E-08    | Metabolism               |
| 0.022636838 | Metabolism               |
| 7.27E-05    | Proliferation/Metastasis |
| 0.001010561 | Proliferation/Metastasis |
| 0.188178579 | Metabolism               |
| 0.051062572 | Metabolism               |
| 0.854652701 | Metabolism               |
| 0.009160899 | Metabolism               |
| 6.12E-19    | Proliferation/Metastasis |
| 0.351246784 | Proliferation/Metastasis |
| 0.00222788  | Metabolism               |
| 0.015770125 | Metabolism               |
| 0.959968831 | Metabolism               |
| 5.65E-09    | TME                      |
| 2.21E-11    | Metabolism               |
| 0.003008962 | Metabolism               |
| 0.007019632 | Metabolism               |
| 0.016847029 | Metabolism               |
| 0.59815637  | Proliferation/Metastasis |
| 0.106477424 | Metabolism               |
| 7.87E-07    | Metabolism               |
| 4.33E-07    | Metabolism               |
| 0.611600519 | Metabolism               |
| 0.24028581  | Metabolism               |
| 0.037825289 | Metabolism               |
| 0.187793327 | Proliferation/Metastasis |
| 8.53E-17    | Metabolism               |
| 1.50E-06    | Metabolism               |
| 0.130277524 | Proliferation/Metastasis |
| 0.001865843 | Metabolism               |
| 0.00470524  | Metabolism               |
| 0.967203604 | Metabolism               |
| 0.414338097 | Metabolism               |
| 0.639532761 | Metabolism               |
| 5.51E-11    | Metabolism               |
| 0.000804844 | Metabolism               |
| 0.004917412 | Metabolism               |
| 6.00E-07    | TME                      |
| 4.28E-06    | TME                      |
| 4.31E-10    | TME                      |



|             |                          |
|-------------|--------------------------|
| 2.35E-09    | TME                      |
| 7.11E-05    | TME                      |
| 0.040889746 | Metabolism               |
| 0.016053961 | Metabolism               |
| 0.781421235 | Proliferation/Metastasis |
| 0.937308417 | Metabolism               |
| 1.03E-16    | Proliferation/Metastasis |
| 0.259216617 | Metabolism               |
| 2.97E-09    | TME                      |
| 1.19E-09    | Metabolism               |
| 0.705296736 | Metabolism               |
| 1.25E-07    | Metabolism               |
| 4.11E-05    | Metabolism               |
| 2.45E-14    | TME                      |
| 2.49E-08    | TME                      |
| 2.05E-11    | Proliferation/Metastasis |
| 0.030915256 | Metabolism               |
| 0.001550393 | Proliferation/Metastasis |
| 0.607023611 | Proliferation/Metastasis |
| 0.185591243 | TME                      |
| 0.004602305 | TME                      |
| 0.943838401 | TME                      |
| 0.003475385 | TME                      |
| 0.60559708  | Metabolism               |
| 0.007208756 | Proliferation/Metastasis |
| 3.22E-14    | Metabolism               |
| 0.001447032 | Metabolism               |
| 0.013598891 | Proliferation/Metastasis |
| 0.475426532 | Proliferation/Metastasis |
| 6.02E-16    | Metabolism               |
| 0.000373552 | Metabolism               |
| 0.015209789 | Metabolism               |
| 0.140570635 | Metabolism               |
| 0.153763705 | TME                      |
| 0.112894472 | TME                      |
| 0.082774888 | TME                      |
| 0.028704501 | TME                      |
| 0.338834665 | TME                      |
| 0.050048409 | Metabolism               |
| 0.00014783  | Metabolism               |
| 0.109436035 | Metabolism               |
| 0.090083307 | Metabolism               |
| 0.413228308 | Metabolism               |

|             |                          |
|-------------|--------------------------|
| 4.95E-11    | TME                      |
| 0.000739415 | TME                      |
| 0.032176264 | TME                      |
| 0.010766774 | TME                      |
| 0.314903005 | TME                      |
| 0.0831266   | TME                      |
| 0.09415169  | TME                      |
| 0.007642928 | TME                      |
| 0.025402185 | TME                      |
| 0.002978425 | Proliferation/Metastasis |
| 8.36E-32    | Proliferation/Metastasis |
| 0.185770292 | Metabolism               |
| 0.043065662 | Metabolism               |
| 6.45E-07    | TME                      |
| 0.100908647 | Metabolism               |
| 1.30E-05    | Metabolism               |
| 0.761918536 | TME                      |
| 1.99E-12    | Proliferation/Metastasis |
| 0.031853938 | Proliferation/Metastasis |
| 1.21E-08    | TME                      |
| 3.87E-05    | Metabolism               |
| 1.02E-17    | Metabolism               |
| 0.031968318 | Proliferation/Metastasis |
| 0.011159991 | Proliferation/Metastasis |
| 0.038510338 | TME                      |
| 0.352154031 | TME                      |
| 0.758886897 | TME                      |
| 0.376835536 | TME                      |
| 8.70E-10    | Proliferation/Metastasis |
| 5.59E-06    | TME                      |
| 0.646826722 | TME                      |
| 0.000655746 | Metabolism               |
| 0.026270312 | TME                      |
| 0.122549389 | TME                      |
| 8.81E-06    | TME                      |
| 4.71E-07    | TME                      |
| 0.743713704 | Metabolism               |
| 0.031983532 | Metabolism               |
| 0.011566758 | Metabolism               |
| 0.036286588 | TME                      |
| 0.000154011 | Metabolism               |
| 0.73995634  | TME                      |
| 0.799997171 | TME                      |

|             |                          |
|-------------|--------------------------|
| 0.058034197 | TME                      |
| 2.70E-09    | TME                      |
| 0.107277362 | TME                      |
| 4.31E-10    | Metabolism               |
| 1.06E-05    | Proliferation/Metastasis |
| 0.002942681 | Metabolism               |
| 0.016995678 | Proliferation/Metastasis |
| 0.001485203 | Metabolism               |
| 0.000269874 | Metabolism               |
| 1.54E-14    | Metabolism               |
| 1.08E-05    | Metabolism               |
| 0.015006238 | Metabolism               |
| 5.27E-07    | Metabolism               |
| 0.590347441 | Metabolism               |
| 0.469479196 | Metabolism               |
| 0.083493457 | Metabolism               |
| 0.012463275 | Metabolism               |
| 0.113203986 | Metabolism               |
| 0.279847476 | Metabolism               |
| 0.370831353 | Metabolism               |
| 0.005204896 | Metabolism               |
| 0.978125681 | TME                      |
| 0.000137554 | Proliferation/Metastasis |
| 6.10E-06    | Metabolism               |
| 0.09750263  | Proliferation/Metastasis |
| 0.001338472 | TME                      |
| 0.738701838 | Proliferation/Metastasis |
| 0.016080991 | Proliferation/Metastasis |
| 0.039340411 | TME                      |
| 0.048897848 | TME                      |
| 1.23E-13    | Metabolism               |
| 2.60E-21    | Metabolism               |
| 0.337329514 | Proliferation/Metastasis |
| 0.086354574 | Proliferation/Metastasis |
| 0.055983198 | Proliferation/Metastasis |
| 2.52E-15    | Metabolism               |
| 1.84E-06    | Metabolism               |
| 0.684797419 | Metabolism               |
| 0.057311911 | Proliferation/Metastasis |
| 0.524059456 | TME                      |
| 0.690354866 | TME                      |
| 2.42E-07    | Metabolism               |
| 0.002176129 | Proliferation/Metastasis |

|             |                          |
|-------------|--------------------------|
| 2.25E-16    | Metabolism               |
| 0.023816022 | TME                      |
| 0.001194467 | TME                      |
| 0.794167804 | TME                      |
| 0.000109912 | TME                      |
| 1.92E-07    | Metabolism               |
| 0.000311602 | TME                      |
| 3.33E-15    | Proliferation/Metastasis |
| 0.58729556  | TME                      |
| 0.853443202 | Proliferation/Metastasis |
| 0.001743692 | Proliferation/Metastasis |
| 4.93E-18    | Metabolism               |
| 0.564745725 | Proliferation/Metastasis |
| 0.961462518 | TME                      |
| 0.001051023 | Metabolism               |
| 6.38E-05    | TME                      |
| 0.00096048  | TME                      |
| 0.002476458 | TME                      |
| 0.030896061 | TME                      |
| 0.044356196 | TME                      |
| 0.457510761 | TME                      |
| 0.405319337 | Metabolism               |
| 0.720522199 | TME                      |
| 2.94E-05    | Metabolism               |
| 0.574894846 | Metabolism               |
| 0.000413389 | Proliferation/Metastasis |
| 0.124059883 | Proliferation/Metastasis |
| 0.504485828 | Metabolism               |
| 0.000537797 | Metabolism               |
| 1.28E-15    | Metabolism               |
| 3.72E-16    | Metabolism               |
| 0.000227606 | Proliferation/Metastasis |
| 0.001917368 | Proliferation/Metastasis |
| 0.590547296 | Metabolism               |
| 0.198167957 | Metabolism               |
| 0.458271257 | Metabolism               |
| 0.598015478 | TME                      |
| 7.89E-14    | Metabolism               |
| 2.18E-06    | Metabolism               |
| 0.374052482 | Metabolism               |
| 7.15E-21    | Metabolism               |
| 0.015354328 | Proliferation/Metastasis |
| 8.00E-05    | Metabolism               |

|             |                          |
|-------------|--------------------------|
| 0.00060598  | Metabolism               |
| 0.005961791 | Metabolism               |
| 2.43E-05    | Metabolism               |
| 1.38E-07    | Metabolism               |
| 0.007815335 | Metabolism               |
| 0.00079858  | Proliferation/Metastasis |
| 0.000192045 | Metabolism               |
| 0.002432588 | Metabolism               |
| 1.35E-15    | Proliferation/Metastasis |
| 1.46E-05    | Metabolism               |
| 2.16E-30    | Metabolism               |
| 6.78E-11    | Metabolism               |
| 0.557809794 | Metabolism               |
| 0.007334224 | Metabolism               |
| 0.000663718 | Metabolism               |
| 0.000539327 | Metabolism               |
| 0.016460793 | Metabolism               |
| 0.172366268 | TME                      |
| 0.156661308 | TME                      |
| 0.595740036 | TME                      |
| 0.014697526 | TME                      |
| 0.023183182 | TME                      |
| 3.97E-06    | Metabolism               |
| 0.395442651 | Metabolism               |
| 1.16E-12    | Proliferation/Metastasis |
| 0.002232308 | Metabolism               |
| 0.000262188 | Proliferation/Metastasis |
| 0.00090413  | Metabolism               |
| 0.075658372 | TME                      |
| 3.83E-14    | Metabolism               |
| 0.000168552 | Metabolism               |
| 0.006223882 | Metabolism               |
| 0.489098404 | Metabolism               |
| 0.800864123 | TME                      |
| 0.038017485 | TME                      |
| 0.041638109 | Proliferation/Metastasis |
| 0.028260051 | Metabolism               |
| 0.172905833 | Proliferation/Metastasis |
| 0.550619218 | Proliferation/Metastasis |
| 4.12E-06    | TME                      |
| 0.012890293 | TME                      |
| 0.307248106 | TME                      |
| 0.153386152 | TME                      |

|             |                          |
|-------------|--------------------------|
| 1.05E-13    | Metabolism               |
| 1.39E-13    | Proliferation/Metastasis |
| 0.136985112 | Metabolism               |
| 8.15E-06    | Metabolism               |
| 1.38E-07    | Proliferation/Metastasis |
| 0.244585686 | Proliferation/Metastasis |
| 0.010680585 | Metabolism               |
| 1.72E-08    | Metabolism               |
| 8.94E-08    | Metabolism               |
| 0.256424843 | Metabolism               |
| 0.939093016 | TME                      |
| 0.075079472 | TME                      |
| 0.393637203 | TME                      |
| 0.007250431 | TME                      |
| 0.046471823 | TME                      |
| 0.078602359 | Metabolism               |
| 7.31E-05    | Metabolism               |
| 0.009878406 | Metabolism               |
| 0.090259287 | Metabolism               |
| 0.082247611 | Metabolism               |
| 0.744513619 | TME                      |
| 0.087802763 | TME                      |
| 0.191389633 | TME                      |
| 0.598691436 | TME                      |
| 0.407871556 | TME                      |
| 0.180683678 | TME                      |
| 0.403412059 | TME                      |
| 0.081061646 | TME                      |
| 0.013549777 | TME                      |
| 2.46E-07    | Proliferation/Metastasis |
| 0.020451415 | Proliferation/Metastasis |
| 9.32E-06    | Metabolism               |
| 1.91E-12    | Metabolism               |
| 0.003517596 | TME                      |
| 1.92E-05    | Metabolism               |
| 0.045372543 | Metabolism               |
| 0.99123422  | TME                      |
| 1.66E-15    | Proliferation/Metastasis |
| 1.03E-12    | Proliferation/Metastasis |
| 0.95737886  | TME                      |
| 0.59848239  | Metabolism               |
| 1.75E-14    | Metabolism               |
| 2.40E-09    | Proliferation/Metastasis |

|             |                          |
|-------------|--------------------------|
| 0.172074996 | Proliferation/Metastasis |
| 0.139858549 | TME                      |
| 0.778968527 | TME                      |
| 0.49746148  | TME                      |
| 0.399583659 | TME                      |
| 2.45E-08    | Proliferation/Metastasis |
| 0.979877734 | TME                      |
| 0.823816751 | TME                      |
| 0.198719286 | Metabolism               |
| 0.457274164 | TME                      |
| 0.4837429   | TME                      |
| 0.186688559 | TME                      |
| 2.43E-20    | TME                      |
| 0.002708672 | Metabolism               |
| 0.004366028 | Metabolism               |
| 2.38E-13    | Metabolism               |
| 0.01303908  | TME                      |
| 6.55E-11    | Metabolism               |
| 0.659975677 | TME                      |
| 0.968075688 | TME                      |
| 0.559240451 | TME                      |
| 0.000514016 | TME                      |
| 0.017026013 | TME                      |
| 2.87E-05    | Metabolism               |
| 3.05E-06    | Proliferation/Metastasis |
| 8.74E-08    | Metabolism               |
| 0.07547765  | Proliferation/Metastasis |
| 5.04E-08    | Metabolism               |
| 3.89E-06    | Metabolism               |
| 0.001197115 | Metabolism               |
| 1.31E-06    | Metabolism               |
| 1.52E-08    | Metabolism               |
| 2.99E-07    | Metabolism               |
| 0.02299694  | Metabolism               |
| 0.041954629 | Metabolism               |
| 0.048600873 | Metabolism               |
| 0.021505773 | Metabolism               |
| 0.014289492 | Metabolism               |
| 0.004376664 | Metabolism               |
| 0.128564556 | Metabolism               |
| 4.70E-12    | Metabolism               |
| 0.795237619 | TME                      |
| 0.485512026 | Proliferation/Metastasis |

|             |                          |
|-------------|--------------------------|
| 0.000366773 | Metabolism               |
| 0.000216762 | Proliferation/Metastasis |
| 0.673060887 | TME                      |
| 0.043962984 | Proliferation/Metastasis |
| 0.469875368 | Proliferation/Metastasis |
| 0.655213056 | TME                      |
| 0.002368147 | TME                      |
| 0.077978414 | Metabolism               |
| 0.048892142 | Metabolism               |
| 1.90E-08    | Proliferation/Metastasis |
| 1.11E-25    | Proliferation/Metastasis |
| 0.254395703 | Proliferation/Metastasis |
| 0.009108282 | Metabolism               |
| 0.064938117 | Metabolism               |
| 1.49E-05    | Metabolism               |
| 0.013776568 | Proliferation/Metastasis |
| 0.058944825 | TME                      |
| 0.055551188 | TME                      |
| 7.91E-12    | Metabolism               |
| 0.460097573 | Proliferation/Metastasis |
| 0.020174425 | Metabolism               |
| 0.964719078 | TME                      |
| 0.413874468 | TME                      |
| 0.484385665 | TME                      |
| 0.00657636  | TME                      |
| 0.295445265 | Metabolism               |
| 0.129091108 | TME                      |
| 0.883890976 | Proliferation/Metastasis |
| 0.57413186  | TME                      |
| 0.251953479 | Proliferation/Metastasis |
| 9.26E-12    | Proliferation/Metastasis |
| 0.685404362 | Metabolism               |
| 2.88E-17    | Proliferation/Metastasis |
| 0.596809618 | TME                      |
| 0.033281642 | Metabolism               |
| 0.748633336 | TME                      |
| 0.556639225 | TME                      |
| 0.0828141   | TME                      |
| 0.136981069 | TME                      |
| 5.72E-05    | TME                      |
| 0.004739146 | TME                      |
| 4.39E-05    | Metabolism               |
| 0.037562185 | TME                      |



|             |                          |
|-------------|--------------------------|
| 1.32E-07    | Metabolism               |
| 2.36E-05    | Metabolism               |
| 0.682212536 | Proliferation/Metastasis |
| 0.326576556 | Proliferation/Metastasis |
| 1.74E-16    | Metabolism               |
| 1.18E-06    | Metabolism               |
| 1.10E-06    | Metabolism               |
| 4.21E-11    | Metabolism               |
| 5.78E-05    | Proliferation/Metastasis |
| 0.033998626 | Proliferation/Metastasis |
| 0.496333116 | Metabolism               |
| 0.110110065 | Metabolism               |
| 2.87E-05    | Metabolism               |
| 0.508791157 | TME                      |
| 0.089958382 | Metabolism               |
| 2.52E-05    | Metabolism               |
| 0.47625002  | Metabolism               |
| 0.035652713 | Metabolism               |
| 0.011979624 | Proliferation/Metastasis |
| 2.46E-05    | Metabolism               |
| 0.053204334 | Metabolism               |
| 3.61E-06    | Metabolism               |
| 8.22E-31    | Metabolism               |
| 5.97E-28    | Metabolism               |
| 3.26E-15    | Metabolism               |
| 1.45E-11    | Proliferation/Metastasis |
| 0.21056002  | Metabolism               |
| 4.80E-10    | Metabolism               |
| 4.50E-06    | Proliferation/Metastasis |
| 6.69E-10    | Metabolism               |
| 0.109463366 | Metabolism               |
| 0.343970803 | Metabolism               |
| 0.93954237  | Metabolism               |
| 8.08E-17    | Metabolism               |
| 0.430937648 | Metabolism               |
| 0.772526315 | Metabolism               |
| 7.66E-07    | Metabolism               |
| 0.681450247 | TME                      |
| 0.304597193 | TME                      |
| 0.635365668 | TME                      |
| 0.99212379  | TME                      |
| 0.018698542 | TME                      |
| 6.01E-05    | Metabolism               |

|             |                          |
|-------------|--------------------------|
| 1.58E-11    | Metabolism               |
| 0.4858718   | Proliferation/Metastasis |
| 0.068588874 | Metabolism               |
| 0.384639168 | Proliferation/Metastasis |
| 3.65E-12    | Metabolism               |
| 1.95E-09    | TME                      |
| 0.142892933 | Metabolism               |
| 8.21E-07    | Metabolism               |
| 0.013820297 | Metabolism               |
| 0.0001227   | Metabolism               |
| 0.58484684  | TME                      |
| 0.030019323 | TME                      |
| 0.38110336  | Proliferation/Metastasis |
| 6.10E-07    | Metabolism               |
| 2.18E-07    | Proliferation/Metastasis |
| 0.000142902 | Proliferation/Metastasis |
| 0.848553819 | TME                      |
| 0.374362804 | TME                      |
| 0.127661996 | TME                      |
| 0.761855629 | TME                      |
| 3.15E-07    | Metabolism               |
| 0.000653766 | Proliferation/Metastasis |
| 0.596174563 | Metabolism               |
| 0.723943828 | Metabolism               |
| 1.40E-19    | Proliferation/Metastasis |
| 0.299452376 | Proliferation/Metastasis |
| 3.78E-06    | Metabolism               |
| 0.500117547 | Metabolism               |
| 4.93E-13    | Metabolism               |
| 1.80E-06    | Metabolism               |
| 0.994795042 | TME                      |
| 0.016087097 | TME                      |
| 0.000131872 | TME                      |
| 0.006541933 | TME                      |
| 0.308828027 | TME                      |
| 0.000603273 | Metabolism               |
| 0.127686109 | Metabolism               |
| 0.005478801 | Metabolism               |
| 0.196033573 | Metabolism               |
| 0.093909553 | Metabolism               |
| 2.56E-07    | TME                      |
| 1.86E-10    | TME                      |
| 0.812775078 | TME                      |

|             |                          |
|-------------|--------------------------|
| 0.239002913 | TME                      |
| 0.680604596 | TME                      |
| 0.068105939 | TME                      |
| 0.122554808 | TME                      |
| 0.54424097  | TME                      |
| 0.601387644 | TME                      |
| 0.038129238 | Proliferation/Metastasis |
| 0.001523867 | Proliferation/Metastasis |
| 0.000675663 | Metabolism               |
| 0.016309074 | Metabolism               |
| 0.03796438  | TME                      |
| 0.002177338 | Metabolism               |
| 0.000909026 | Metabolism               |
| 0.235069553 | TME                      |
| 2.36E-10    | Proliferation/Metastasis |
| 5.17E-11    | Proliferation/Metastasis |
| 0.007403881 | TME                      |
| 0.001793228 | Metabolism               |
| 0.002000844 | Metabolism               |
| 0.001046699 | Proliferation/Metastasis |
| 0.003483278 | Proliferation/Metastasis |
| 0.003129851 | TME                      |
| 0.276338881 | TME                      |
| 0.002540973 | TME                      |
| 8.55E-06    | TME                      |
| 0.016629224 | Proliferation/Metastasis |
| 1.23E-09    | TME                      |
| 0.546297543 | TME                      |
| 0.21613072  | Metabolism               |
| 4.97E-05    | TME                      |
| 0.002047254 | TME                      |
| 0.764923006 | TME                      |
| 4.83E-16    | TME                      |
| 0.004577302 | Metabolism               |
| 0.008643925 | Metabolism               |
| 0.000128432 | Metabolism               |
| 7.21E-07    | TME                      |
| 0.46244107  | Metabolism               |
| 0.034357955 | TME                      |
| 0.550250484 | TME                      |
| 0.273755545 | TME                      |
| 0.012596066 | TME                      |
| 0.001714208 | TME                      |

|             |                          |
|-------------|--------------------------|
| 2.83E-07    | Metabolism               |
| 0.087021347 | Proliferation/Metastasis |
| 6.59E-12    | Metabolism               |
| 0.00659524  | Proliferation/Metastasis |
| 0.697524141 | Metabolism               |
| 0.087892324 | Metabolism               |
| 1.19E-05    | Metabolism               |
| 1.14E-07    | Metabolism               |
| 5.04E-05    | Metabolism               |
| 7.85E-16    | Metabolism               |
| 0.000803497 | Metabolism               |
| 0.151126161 | Metabolism               |
| 2.47E-05    | Metabolism               |
| 1.78E-06    | Metabolism               |
| 0.885187599 | Metabolism               |
| 0.251187085 | Metabolism               |
| 0.043145206 | Metabolism               |
| 4.91E-05    | Metabolism               |
| 0.091286789 | TME                      |
| 0.276706589 | Proliferation/Metastasis |
| 0.459878072 | Metabolism               |
| 0.348215354 | Proliferation/Metastasis |
| 0.777556037 | TME                      |
| 0.269413644 | Proliferation/Metastasis |
| 0.18861417  | Proliferation/Metastasis |
| 0.594582537 | TME                      |
| 0.000551316 | TME                      |
| 0.348307107 | Metabolism               |
| 0.000979804 | Metabolism               |
| 0.015394752 | Proliferation/Metastasis |
| 0.00158591  | Proliferation/Metastasis |
| 0.000666224 | Proliferation/Metastasis |
| 0.738343502 | Metabolism               |
| 0.001750578 | Metabolism               |
| 0.034588061 | Metabolism               |
| 0.000231155 | Proliferation/Metastasis |
| 0.130255662 | TME                      |
| 0.742900308 | TME                      |
| 3.76E-08    | Metabolism               |
| 0.017853817 | Proliferation/Metastasis |
| 0.001902453 | Metabolism               |
| 0.17033944  | TME                      |
| 0.232591291 | TME                      |

|             |                          |
|-------------|--------------------------|
| 0.042119246 | TME                      |
| 1.59E-09    | TME                      |
| 0.718801727 | Metabolism               |
| 9.42E-07    | TME                      |
| 0.301229192 | Proliferation/Metastasis |
| 0.000365517 | TME                      |
| 0.86057502  | Proliferation/Metastasis |
| 0.037178307 | Proliferation/Metastasis |
| 1.97E-22    | Metabolism               |
| 0.028799153 | Proliferation/Metastasis |
| 0.563687064 | TME                      |
| 0.017197663 | Metabolism               |
| 0.093749291 | TME                      |
| 0.02607146  | TME                      |
| 0.045033342 | TME                      |
| 0.588831494 | TME                      |
| 6.81E-08    | TME                      |
| 0.000577407 | TME                      |
| 2.02E-12    | Metabolism               |
| 0.000418999 | TME                      |
| 0.001289235 | Metabolism               |
| 0.210355131 | Metabolism               |
| 0.020851546 | Proliferation/Metastasis |
| 0.001100731 | Proliferation/Metastasis |
| 0.000708165 | Metabolism               |
| 0.00170328  | Metabolism               |
| 4.53E-21    | Metabolism               |
| 5.89E-05    | Metabolism               |
| 0.544731494 | Proliferation/Metastasis |
| 1.40E-15    | Proliferation/Metastasis |
| 0.00041352  | Metabolism               |
| 0.111179765 | Metabolism               |
| 2.19E-07    | Metabolism               |
| 1.89E-06    | TME                      |
| 0.007263975 | Metabolism               |
| 0.018759914 | Metabolism               |
| 0.947611981 | Metabolism               |
| 0.281834543 | Metabolism               |
| 0.007979088 | Proliferation/Metastasis |
| 0.103081717 | Metabolism               |
| 0.601730134 | Metabolism               |
| 0.961785152 | Metabolism               |
| 2.05E-10    | Metabolism               |

|             |                          |
|-------------|--------------------------|
| 1.11E-10    | Metabolism               |
| 0.000147635 | Metabolism               |
| 4.09E-08    | Proliferation/Metastasis |
| 0.913680364 | Metabolism               |
| 0.790498874 | Metabolism               |
| 5.05E-21    | Proliferation/Metastasis |
| 0.43712017  | Metabolism               |
| 0.000172801 | Metabolism               |
| 0.000655243 | Metabolism               |
| 0.071973764 | Metabolism               |
| 0.101120956 | Metabolism               |
| 0.033435017 | Metabolism               |
| 1.45E-06    | Metabolism               |
| 0.001818646 | Metabolism               |
| 0.01742851  | TME                      |
| 0.367163633 | TME                      |
| 1.12E-06    | TME                      |
| 0.013097257 | TME                      |
| 0.082743119 | TME                      |
| 0.04233444  | Metabolism               |
| 0.34290441  | Metabolism               |
| 0.262073857 | Proliferation/Metastasis |
| 0.000818796 | Metabolism               |
| 0.000616039 | Proliferation/Metastasis |
| 0.978055997 | Metabolism               |
| 0.003954611 | TME                      |
| 0.145242317 | Metabolism               |
| 0.001645095 | Metabolism               |
| 0.028782359 | Metabolism               |
| 0.535445667 | Metabolism               |
| 0.454472292 | TME                      |
| 0.020795405 | TME                      |
| 0.660170257 | Proliferation/Metastasis |
| 2.31E-07    | Metabolism               |
| 0.006893746 | Proliferation/Metastasis |
| 0.010210438 | Proliferation/Metastasis |
| 1.62E-12    | TME                      |
| 1.03E-06    | TME                      |
| 4.35E-09    | TME                      |
| 2.65E-13    | TME                      |
| 1.66E-07    | Metabolism               |
| 1.87E-10    | Proliferation/Metastasis |
| 0.000859908 | Metabolism               |

|             |                          |
|-------------|--------------------------|
| 7.72E-11    | Metabolism               |
| 0.281341784 | Proliferation/Metastasis |
| 1.56E-16    | Proliferation/Metastasis |
| 4.60E-22    | Metabolism               |
| 1.08E-07    | Metabolism               |
| 3.34E-18    | Metabolism               |
| 0.019269396 | Metabolism               |
| 0.000219242 | TME                      |
| 7.17E-21    | TME                      |
| 1.97E-09    | TME                      |
| 0.01092534  | TME                      |
| 1.09E-18    | TME                      |
| 0.081632598 | Metabolism               |
| 0.0154463   | Metabolism               |
| 0.025123048 | Metabolism               |
| 0.268559883 | Metabolism               |
| 0.000125205 | Metabolism               |
| 6.03E-06    | TME                      |
| 0.131275838 | TME                      |
| 4.41E-19    | TME                      |
| 1.79E-10    | TME                      |
| 5.20E-06    | TME                      |
| 8.36E-08    | TME                      |
| 3.05E-08    | TME                      |
| 6.38E-18    | TME                      |
| 1.11E-09    | TME                      |
| 0.394065768 | Proliferation/Metastasis |
| 1.77E-09    | Proliferation/Metastasis |
| 0.112683524 | Metabolism               |
| 0.012510857 | Metabolism               |
| 3.23E-14    | TME                      |
| 0.711038957 | Metabolism               |
| 0.001205318 | Metabolism               |
| 3.98E-19    | TME                      |
| 0.000362536 | Proliferation/Metastasis |
| 0.214409786 | Proliferation/Metastasis |
| 1.98E-09    | TME                      |
| 0.006005986 | Metabolism               |
| 2.75E-19    | Metabolism               |
| 0.550454504 | Proliferation/Metastasis |
| 9.51E-12    | Proliferation/Metastasis |
| 0.00027644  | TME                      |
| 1.58E-19    | TME                      |

|             |                          |
|-------------|--------------------------|
| 6.69E-08    | TME                      |
| 0.000290102 | TME                      |
| 0.145900037 | Proliferation/Metastasis |
| 0.088904938 | TME                      |
| 2.02E-19    | TME                      |
| 1.10E-07    | Metabolism               |
| 8.00E-12    | TME                      |
| 3.20E-14    | TME                      |
| 8.26E-12    | TME                      |
| 0.15581548  | TME                      |
| 0.698140893 | Metabolism               |
| 0.725721678 | Metabolism               |
| 0.000269705 | Metabolism               |
| 0.001792678 | TME                      |
| 0.003342849 | Metabolism               |
| 4.35E-14    | TME                      |
| 0.00629766  | TME                      |
| 2.87E-13    | TME                      |
| 8.09E-13    | TME                      |
| 0.000106553 | TME                      |
| 1.02E-12    | Metabolism               |
| 0.120032975 | Proliferation/Metastasis |
| 1.57E-19    | Metabolism               |
| 0.764554676 | Proliferation/Metastasis |
| 3.95E-09    | Metabolism               |
| 2.04E-06    | Metabolism               |
| 1.83E-15    | Metabolism               |
| 1.94E-09    | Metabolism               |
| 7.08E-08    | Metabolism               |
| 2.38E-11    | Metabolism               |
| 0.017194438 | Metabolism               |
| 1.32E-10    | Metabolism               |
| 8.26E-07    | Metabolism               |
| 2.35E-10    | Metabolism               |
| 1.65E-20    | Metabolism               |
| 2.03E-11    | Metabolism               |
| 8.32E-06    | Metabolism               |
| 0.017491052 | Metabolism               |
| 1.14E-10    | TME                      |
| 0.209648442 | Proliferation/Metastasis |
| 0.004620568 | Metabolism               |
| 2.38E-23    | Proliferation/Metastasis |
| 1.18E-10    | TME                      |



|             |                          |
|-------------|--------------------------|
| 5.30E-37    | Proliferation/Metastasis |
| 7.40E-29    | Proliferation/Metastasis |
| 1.80E-15    | TME                      |
| 3.40E-22    | TME                      |
| 0.476603741 | Metabolism               |
| 6.58E-05    | Metabolism               |
| 1.38E-05    | Proliferation/Metastasis |
| 0.765991365 | Proliferation/Metastasis |
| 1.71E-20    | Proliferation/Metastasis |
| 0.000450795 | Metabolism               |
| 0.003689492 | Metabolism               |
| 1.19E-05    | Metabolism               |
| 4.95E-13    | Proliferation/Metastasis |
| 3.92E-13    | TME                      |
| 9.37E-13    | TME                      |
| 0.319408577 | Metabolism               |
| 3.05E-17    | Proliferation/Metastasis |
| 0.004226888 | Metabolism               |
| 0.000223849 | TME                      |
| 2.11E-07    | TME                      |
| 0.005721202 | TME                      |
| 3.11E-08    | TME                      |
| 1.44E-08    | Metabolism               |
| 0.000233441 | TME                      |
| 0.079021039 | Proliferation/Metastasis |
| 2.59E-27    | TME                      |
| 0.084240037 | Proliferation/Metastasis |
| 3.08E-05    | Proliferation/Metastasis |
| 0.886418942 | Metabolism               |
| 0.528181081 | Proliferation/Metastasis |
| 2.50E-12    | TME                      |
| 0.422630389 | Metabolism               |
| 3.94E-11    | TME                      |
| 0.005380569 | TME                      |
| 0.255143013 | TME                      |
| 5.19E-16    | TME                      |
| 0.00475919  | TME                      |
| 1.03E-06    | TME                      |
| 1.24E-15    | Metabolism               |
| 1.05E-25    | TME                      |
| 2.90E-08    | Metabolism               |
| 0.010390796 | Metabolism               |
| 7.71E-20    | Proliferation/Metastasis |

|             |                          |
|-------------|--------------------------|
| 0.00017852  | Proliferation/Metastasis |
| 0.016426366 | Metabolism               |
| 1.92E-06    | Metabolism               |
| 0.025751687 | Metabolism               |
| 8.04E-11    | Metabolism               |
| 8.51E-38    | Proliferation/Metastasis |
| 0.023789156 | Proliferation/Metastasis |
| 2.41E-05    | Metabolism               |
| 1.15E-05    | Metabolism               |
| 8.36E-11    | Metabolism               |
| 7.97E-05    | TME                      |
| 1.45E-13    | Metabolism               |
| 2.41E-09    | Metabolism               |
| 0.005835175 | Metabolism               |
| 1.23E-05    | Metabolism               |
| 2.75E-12    | Proliferation/Metastasis |
| 5.10E-12    | Metabolism               |
| 0.000159692 | Metabolism               |
| 0.029453393 | Metabolism               |
| 0.001259036 | Metabolism               |
| 0.000417168 | Metabolism               |
| 0.029565688 | Metabolism               |
| 0.143983249 | Proliferation/Metastasis |
| 5.12E-09    | Metabolism               |
| 6.70E-11    | Metabolism               |
| 0.603896337 | Proliferation/Metastasis |
| 0.017034017 | Metabolism               |
| 0.012953438 | Metabolism               |
| 0.032384593 | Metabolism               |
| 1.05E-06    | Metabolism               |
| 0.246507858 | Metabolism               |
| 6.68E-06    | Metabolism               |
| 0.063795058 | Metabolism               |
| 0.378577047 | Metabolism               |
| 1.50E-12    | TME                      |
| 1.94E-17    | TME                      |
| 6.21E-18    | TME                      |
| 4.42E-15    | TME                      |
| 2.63E-09    | TME                      |
| 0.137828444 | Metabolism               |
| 0.572923281 | Metabolism               |
| 0.716668169 | Proliferation/Metastasis |
| 0.114651324 | Metabolism               |

|             |                          |
|-------------|--------------------------|
| 2.01E-28    | Proliferation/Metastasis |
| 0.001281115 | Metabolism               |
| 0.009231194 | TME                      |
| 4.13E-07    | Metabolism               |
| 0.031953352 | Metabolism               |
| 1.18E-10    | Metabolism               |
| 0.312470847 | Metabolism               |
| 6.51E-12    | TME                      |
| 0.079733412 | TME                      |
| 9.32E-23    | Proliferation/Metastasis |
| 7.97E-10    | Metabolism               |
| 0.008184952 | Proliferation/Metastasis |
| 0.032037849 | Proliferation/Metastasis |
| 0.106613733 | TME                      |
| 0.390294675 | TME                      |
| 0.208933519 | TME                      |
| 0.874469983 | TME                      |
| 3.27E-06    | Metabolism               |
| 0.000521915 | Proliferation/Metastasis |
| 5.94E-06    | Metabolism               |
| 0.18149051  | Metabolism               |
| 2.21E-11    | Proliferation/Metastasis |
| 0.371192429 | Proliferation/Metastasis |
| 0.000586607 | Metabolism               |
| 0.364571887 | Metabolism               |
| 2.19E-07    | Metabolism               |
| 0.154433363 | Metabolism               |
| 0.074378654 | TME                      |
| 0.005806302 | TME                      |
| 0.127209286 | TME                      |
| 0.044612908 | TME                      |
| 0.051014292 | TME                      |
| 0.159308617 | Metabolism               |
| 0.003579395 | Metabolism               |
| 0.000313296 | Metabolism               |
| 0.790116868 | Metabolism               |
| 0.658599851 | Metabolism               |
| 0.135846417 | TME                      |
| 0.000238622 | TME                      |
| 0.317966235 | TME                      |
| 0.672399697 | TME                      |
| 0.064429956 | TME                      |
| 0.025187822 | TME                      |

|             |                          |
|-------------|--------------------------|
| 0.060442714 | TME                      |
| 0.652193159 | TME                      |
| 0.573878049 | TME                      |
| 4.44E-16    | Proliferation/Metastasis |
| 9.91E-09    | Proliferation/Metastasis |
| 7.85E-11    | Metabolism               |
| 0.000189722 | Metabolism               |
| 0.607425951 | TME                      |
| 5.36E-09    | Metabolism               |
| 1.55E-06    | Metabolism               |
| 0.293111061 | TME                      |
| 3.97E-06    | Proliferation/Metastasis |
| 1.47E-15    | Proliferation/Metastasis |
| 0.374413266 | TME                      |
| 9.93E-11    | Metabolism               |
| 0.494910871 | Metabolism               |
| 9.60E-17    | Proliferation/Metastasis |
| 0.1166177   | Proliferation/Metastasis |
| 0.510643412 | TME                      |
| 0.749937986 | TME                      |
| 0.264245383 | TME                      |
| 0.031826405 | TME                      |
| 4.36E-10    | Proliferation/Metastasis |
| 0.416734373 | TME                      |
| 0.514170194 | TME                      |
| 0.00045328  | Metabolism               |
| 0.243443967 | TME                      |
| 0.833415894 | TME                      |
| 0.425942733 | TME                      |
| 0.074463642 | TME                      |
| 0.052941099 | Metabolism               |
| 0.089029647 | Metabolism               |
| 6.36E-06    | Metabolism               |
| 0.004736782 | TME                      |
| 0.803247681 | Metabolism               |
| 0.792083442 | TME                      |
| 0.538578782 | TME                      |
| 0.198038434 | TME                      |
| 0.876240029 | TME                      |
| 0.282390939 | TME                      |
| 0.172321152 | Metabolism               |
| 6.21E-18    | Proliferation/Metastasis |
| 0.018648315 | Metabolism               |

|             |                          |
|-------------|--------------------------|
| 0.344226296 | Proliferation/Metastasis |
| 0.858001519 | Metabolism               |
| 0.955523627 | Metabolism               |
| 0.005161606 | Metabolism               |
| 0.018090249 | Metabolism               |
| 0.000583217 | Metabolism               |
| 0.720570508 | Metabolism               |
| 0.929578502 | Metabolism               |
| 0.493477308 | Metabolism               |
| 0.218735859 | Metabolism               |
| 0.150054155 | Metabolism               |
| 0.791034066 | Metabolism               |
| 0.100019732 | Metabolism               |
| 0.640591522 | Metabolism               |
| 0.000160537 | Metabolism               |
| 0.175360843 | TME                      |
| 0.662126291 | Proliferation/Metastasis |
| 7.84E-07    | Metabolism               |
| 0.000269564 | Proliferation/Metastasis |
| 0.142123181 | TME                      |
| 0.690217061 | Proliferation/Metastasis |
| 0.522075605 | Proliferation/Metastasis |
| 0.354322474 | TME                      |
| 0.016673218 | TME                      |
| 1.52E-05    | Metabolism               |
| 0.003982856 | Metabolism               |
| 7.27E-11    | Proliferation/Metastasis |
| 2.17E-12    | Proliferation/Metastasis |
| 0.097793995 | Proliferation/Metastasis |
| 2.46E-10    | Metabolism               |
| 0.000243551 | Metabolism               |
| 1.57E-06    | Metabolism               |
| 0.5858263   | Proliferation/Metastasis |
| 0.769831262 | TME                      |
| 0.895983219 | TME                      |
| 0.301800907 | Metabolism               |
| 0.001850912 | Proliferation/Metastasis |
| 6.19E-06    | Metabolism               |
| 0.7221528   | TME                      |
| 0.042569128 | TME                      |
| 0.102100543 | TME                      |
| 0.032550352 | TME                      |
| 8.35E-05    | Metabolism               |

|             |                          |
|-------------|--------------------------|
| 0.943435868 | TME                      |
| 7.67E-17    | Proliferation/Metastasis |
| 0.122400312 | TME                      |
| 0.079340922 | Proliferation/Metastasis |
| 6.08E-10    | Proliferation/Metastasis |
| 0.419706233 | Metabolism               |
| 1.51E-11    | Proliferation/Metastasis |
| 0.540481663 | TME                      |
| 0.003914086 | Metabolism               |
| 0.286436347 | TME                      |
| 0.147578545 | TME                      |
| 0.006734724 | TME                      |
| 0.470698997 | TME                      |
| 0.005097772 | TME                      |
| 0.017830376 | TME                      |
| 0.001255562 | Metabolism               |
| 0.006223691 | TME                      |
| 0.000213925 | Metabolism               |
| 0.654563565 | Metabolism               |
| 0.649464349 | Proliferation/Metastasis |
| 0.290977586 | Proliferation/Metastasis |
| 3.19E-12    | Metabolism               |
| 0.055144521 | Metabolism               |
| 0.076015897 | Metabolism               |
| 0.247978527 | Metabolism               |
| 0.107528474 | Proliferation/Metastasis |
| 0.004106834 | Proliferation/Metastasis |
| 0.518413557 | Metabolism               |
| 0.495616625 | Metabolism               |
| 6.87E-09    | Metabolism               |
| 0.004375157 | TME                      |
| 0.004971853 | Metabolism               |
| 0.473802098 | Metabolism               |
| 0.247047295 | Metabolism               |
| 0.011535698 | Metabolism               |
| 3.23E-08    | Proliferation/Metastasis |
| 0.048804328 | Metabolism               |
| 2.82E-09    | Metabolism               |
| 0.0013253   | Metabolism               |
| 3.43E-06    | Metabolism               |
| 9.39E-07    | Metabolism               |
| 8.97E-07    | Metabolism               |
| 0.468026451 | Proliferation/Metastasis |

|             |                          |
|-------------|--------------------------|
| 0.000264122 | Metabolism               |
| 0.536865836 | Metabolism               |
| 0.937815893 | Proliferation/Metastasis |
| 0.000308547 | Metabolism               |
| 4.13E-07    | Metabolism               |
| 0.000657519 | Metabolism               |
| 0.692392098 | Metabolism               |
| 0.003145103 | Metabolism               |
| 6.51E-06    | Metabolism               |
| 0.797382837 | Metabolism               |
| 0.002374172 | Metabolism               |
| 0.014188368 | TME                      |
| 0.265955018 | TME                      |
| 0.004227819 | TME                      |
| 0.006886058 | TME                      |
| 0.09797359  | TME                      |
| 0.000281388 | Metabolism               |
| 2.13E-05    | Metabolism               |
| 0.001581247 | Proliferation/Metastasis |
| 0.546706304 | Metabolism               |
| 0.616506685 | Proliferation/Metastasis |
| 0.119080249 | Metabolism               |
| 0.790503531 | TME                      |
| 0.000118824 | Metabolism               |
| 0.046462882 | Metabolism               |
| 0.932205224 | Metabolism               |
| 0.011290517 | Metabolism               |
| 0.073571242 | TME                      |
| 0.016600706 | TME                      |
| 0.002290413 | Proliferation/Metastasis |
| 5.68E-07    | Metabolism               |
| 0.465793154 | Proliferation/Metastasis |
| 0.969611181 | Proliferation/Metastasis |
| 0.010875157 | TME                      |
| 0.60451861  | TME                      |
| 0.697991256 | TME                      |
| 0.774087161 | TME                      |
| 0.004648606 | Metabolism               |
| 0.945398934 | Proliferation/Metastasis |
| 0.634644592 | Metabolism               |
| 0.833432326 | Metabolism               |
| 0.704302021 | Proliferation/Metastasis |
| 0.392269057 | Proliferation/Metastasis |

|             |                          |
|-------------|--------------------------|
| 0.130532337 | Metabolism               |
| 0.701391704 | Metabolism               |
| 0.151281282 | Metabolism               |
| 0.294564017 | Metabolism               |
| 0.909765703 | TME                      |
| 0.086573105 | TME                      |
| 0.546323272 | TME                      |
| 0.908509208 | TME                      |
| 0.104185212 | TME                      |
| 0.164653715 | Metabolism               |
| 0.629905123 | Metabolism               |
| 0.635804978 | Metabolism               |
| 0.222848135 | Metabolism               |
| 0.451556911 | Metabolism               |
| 0.234407245 | TME                      |
| 0.902760268 | TME                      |
| 0.949462188 | TME                      |
| 0.810952978 | TME                      |
| 0.643260108 | TME                      |
| 0.721556301 | TME                      |
| 0.74182078  | TME                      |
| 0.835469936 | TME                      |
| 0.919648246 | TME                      |
| 0.158269489 | Proliferation/Metastasis |
| 1.45E-05    | Proliferation/Metastasis |
| 0.069580422 | Metabolism               |
| 0.133593086 | Metabolism               |
| 0.061414834 | TME                      |
| 0.497823421 | Metabolism               |
| 0.001423186 | Metabolism               |
| 0.856400994 | TME                      |
| 0.186004417 | Proliferation/Metastasis |
| 0.461644365 | Proliferation/Metastasis |
| 0.322177824 | TME                      |
| 0.648864082 | Metabolism               |
| 0.37460929  | Metabolism               |
| 0.147354909 | Proliferation/Metastasis |
| 0.24166666  | Proliferation/Metastasis |
| 0.608589012 | TME                      |
| 0.944074387 | TME                      |
| 0.721170313 | TME                      |
| 0.421374161 | TME                      |
| 0.032165921 | Proliferation/Metastasis |



|             |                          |
|-------------|--------------------------|
| 0.231599515 | TME                      |
| 0.780047611 | TME                      |
| 0.047595414 | Metabolism               |
| 0.656354497 | TME                      |
| 0.763141768 | TME                      |
| 0.768091746 | TME                      |
| 0.830401792 | TME                      |
| 0.075173759 | Metabolism               |
| 0.007098559 | Metabolism               |
| 0.711972013 | Metabolism               |
| 0.116858095 | TME                      |
| 0.513746902 | Metabolism               |
| 0.668108876 | TME                      |
| 0.739033476 | TME                      |
| 0.660159776 | TME                      |
| 0.323956689 | TME                      |
| 0.639838543 | TME                      |
| 0.621638514 | Metabolism               |
| 0.051025169 | Proliferation/Metastasis |
| 0.594307759 | Metabolism               |
| 0.018865937 | Proliferation/Metastasis |
| 0.734831505 | Metabolism               |
| 0.160897684 | Metabolism               |
| 0.451116893 | Metabolism               |
| 0.439331224 | Metabolism               |
| 0.975366877 | Metabolism               |
| 0.03240759  | Metabolism               |
| 0.783657913 | Metabolism               |
| 0.007667101 | Metabolism               |
| 0.367061772 | Metabolism               |
| 0.336477412 | Metabolism               |
| 0.558852013 | Metabolism               |
| 0.643218651 | Metabolism               |
| 0.862759897 | Metabolism               |
| 0.078413273 | Metabolism               |
| 0.483421932 | TME                      |
| 0.917663267 | Proliferation/Metastasis |
| 0.835020811 | Metabolism               |
| 0.481386358 | Proliferation/Metastasis |
| 0.717435345 | TME                      |
| 0.404441103 | Proliferation/Metastasis |
| 0.771109665 | Proliferation/Metastasis |
| 0.418288764 | TME                      |

|             |                          |
|-------------|--------------------------|
| 0.469922795 | TME                      |
| 0.894153356 | Metabolism               |
| 0.001906787 | Metabolism               |
| 0.835499996 | Proliferation/Metastasis |
| 0.017947327 | Proliferation/Metastasis |
| 0.210058131 | Proliferation/Metastasis |
| 0.347553009 | Metabolism               |
| 0.701859004 | Metabolism               |
| 0.000381872 | Metabolism               |
| 0.918286125 | Proliferation/Metastasis |
| 0.606721939 | TME                      |
| 0.97691048  | TME                      |
| 0.215951249 | Metabolism               |
| 0.084222837 | Proliferation/Metastasis |
| 0.000271799 | Metabolism               |
| 0.898128805 | TME                      |
| 0.51512368  | TME                      |
| 0.051953901 | TME                      |
| 0.619882596 | TME                      |
| 0.269580603 | Metabolism               |
| 0.893410499 | TME                      |
| 0.281277593 | Proliferation/Metastasis |
| 0.487179851 | TME                      |
| 0.014950578 | Proliferation/Metastasis |
| 0.247304871 | Proliferation/Metastasis |
| 0.787215228 | Metabolism               |
| 0.272775972 | Proliferation/Metastasis |
| 0.687840723 | TME                      |
| 0.781998959 | Metabolism               |
| 0.653389913 | TME                      |
| 0.698973309 | TME                      |
| 0.168397272 | TME                      |
| 0.781182    | TME                      |
| 0.518116981 | TME                      |
| 0.704678588 | TME                      |
| 0.408002482 | Metabolism               |
| 0.813790733 | TME                      |
| 0.451045344 | Metabolism               |
| 0.932039801 | Metabolism               |
| 0.975242333 | Proliferation/Metastasis |
| 0.16117965  | Proliferation/Metastasis |
| 0.855997394 | Metabolism               |
| 0.908597101 | Metabolism               |

|             |                          |
|-------------|--------------------------|
| 0.044382148 | Metabolism               |
| 0.672272602 | Metabolism               |
| 0.491315555 | Proliferation/Metastasis |
| 0.106839227 | Proliferation/Metastasis |
| 0.939803275 | Metabolism               |
| 0.654558796 | Metabolism               |
| 0.340967459 | Metabolism               |
| 0.089109216 | TME                      |
| 0.764743372 | Metabolism               |
| 0.464366069 | Metabolism               |
| 0.296413619 | Metabolism               |
| 0.653946897 | Metabolism               |
| 0.945570534 | Proliferation/Metastasis |
| 0.279982193 | Metabolism               |
| 0.131775875 | Metabolism               |
| 0.012155029 | Metabolism               |
| 0.812331792 | Metabolism               |
| 0.800630226 | Metabolism               |
| 0.046658332 | Metabolism               |
| 0.264648888 | Proliferation/Metastasis |
| 0.062753184 | Metabolism               |
| 0.469701948 | Metabolism               |
| 0.476883792 | Proliferation/Metastasis |
| 0.465148498 | Metabolism               |
| 0.085830522 | Metabolism               |
| 0.702124018 | Metabolism               |
| 0.261528182 | Metabolism               |
| 0.672102544 | Metabolism               |
| 0.676434328 | Metabolism               |
| 0.566908463 | Metabolism               |
| 0.744143956 | Metabolism               |
| 0.994292595 | TME                      |
| 0.851209068 | TME                      |
| 0.713780878 | TME                      |
| 0.38939914  | TME                      |
| 0.296328426 | TME                      |
| 0.24919177  | Metabolism               |
| 0.384201343 | Metabolism               |
| 0.488833821 | Proliferation/Metastasis |
| 0.28309688  | Metabolism               |
| 0.649461308 | Proliferation/Metastasis |
| 0.009630015 | Metabolism               |
| 0.151508864 | TME                      |

|             |                          |
|-------------|--------------------------|
| 0.484019321 | Metabolism               |
| 0.105782526 | Metabolism               |
| 0.563649839 | Metabolism               |
| 0.008955119 | Metabolism               |
| 0.95542112  | TME                      |
| 0.034580552 | TME                      |
| 0.014398192 | Proliferation/Metastasis |
| 0.792460429 | Metabolism               |
| 0.513110852 | Proliferation/Metastasis |
| 0.58380632  | Proliferation/Metastasis |
| 0.629961933 | TME                      |
| 0.491182276 | TME                      |
| 0.079416022 | TME                      |
| 0.707225    | TME                      |
| 0.029281273 | Metabolism               |
| 0.857717265 | Proliferation/Metastasis |
| 0.383430583 | Metabolism               |
| 0.391097159 | Metabolism               |
| 0.330564417 | Proliferation/Metastasis |
| 0.01007475  | Proliferation/Metastasis |
| 0.396934771 | Metabolism               |
| 0.773768844 | Metabolism               |
| 0.201864955 | Metabolism               |
| 0.677372632 | Metabolism               |
| 0.721275645 | TME                      |
| 0.523306335 | TME                      |
| 0.019641564 | TME                      |
| 0.880086836 | TME                      |
| 0.853719404 | TME                      |
| 0.410626381 | Metabolism               |
| 0.056107111 | Metabolism               |
| 0.216918667 | Metabolism               |
| 0.83631483  | Metabolism               |
| 0.526748393 | Metabolism               |
| 0.024542757 | TME                      |
| 0.013666565 | TME                      |
| 0.265949752 | TME                      |
| 0.352464822 | TME                      |
| 0.39036891  | TME                      |
| 0.659099391 | TME                      |
| 0.498800494 | TME                      |
| 0.208278801 | TME                      |
| 0.427751811 | TME                      |

|             |                          |
|-------------|--------------------------|
| 0.592598642 | Proliferation/Metastasis |
| 0.132616098 | Proliferation/Metastasis |
| 0.40835788  | Metabolism               |
| 0.098968314 | Metabolism               |
| 0.556574128 | TME                      |
| 0.125028966 | Metabolism               |
| 0.036113498 | Metabolism               |
| 0.046422975 | TME                      |
| 0.009616777 | Proliferation/Metastasis |
| 0.77557518  | Proliferation/Metastasis |
| 0.835661185 | TME                      |
| 0.54555865  | Metabolism               |
| 0.214526751 | Metabolism               |
| 0.612772305 | Proliferation/Metastasis |
| 0.010550083 | Proliferation/Metastasis |
| 0.172841412 | TME                      |
| 0.069473809 | TME                      |
| 0.214077857 | TME                      |
| 0.214955348 | TME                      |
| 0.235846292 | Proliferation/Metastasis |
| 0.072063828 | TME                      |
| 0.040683357 | TME                      |
| 0.927726117 | Metabolism               |
| 0.121211106 | TME                      |
| 0.05354987  | TME                      |
| 0.708311436 | TME                      |
| 0.320138108 | TME                      |
| 0.424723034 | Metabolism               |
| 0.428359795 | Metabolism               |
| 0.378733284 | Metabolism               |
| 0.305640952 | TME                      |
| 0.593676995 | Metabolism               |
| 0.179744349 | TME                      |
| 0.512737029 | TME                      |
| 0.305224965 | TME                      |
| 0.773229257 | TME                      |
| 0.705862991 | TME                      |
| 0.883818537 | Metabolism               |
| 0.223056725 | Proliferation/Metastasis |
| 0.081453737 | Metabolism               |
| 0.197138215 | Proliferation/Metastasis |
| 0.867034583 | Metabolism               |
| 0.730925377 | Metabolism               |

|             |                          |
|-------------|--------------------------|
| 0.870044147 | Metabolism               |
| 0.918365353 | Metabolism               |
| 0.563526294 | Metabolism               |
| 0.970225141 | Metabolism               |
| 0.176633761 | Metabolism               |
| 0.564963393 | Metabolism               |
| 0.273680873 | Metabolism               |
| 0.646041539 | Metabolism               |
| 0.150977125 | Metabolism               |
| 0.280083151 | Metabolism               |
| 0.655889116 | Metabolism               |
| 0.789935618 | Metabolism               |
| 0.085807009 | TME                      |
| 0.012735894 | Proliferation/Metastasis |
| 0.587751526 | Metabolism               |
| 0.234485351 | Proliferation/Metastasis |
| 0.842443394 | TME                      |
| 0.205189739 | Proliferation/Metastasis |
| 0.101106516 | Proliferation/Metastasis |
| 0.364796242 | TME                      |
| 0.748828907 | TME                      |
| 0.168502603 | Metabolism               |
| 0.00947387  | Metabolism               |
| 0.9921827   | Proliferation/Metastasis |
| 0.218631259 | Proliferation/Metastasis |
| 0.03285569  | Proliferation/Metastasis |
| 0.160265739 | Metabolism               |
| 0.926067432 | Metabolism               |
| 0.162719386 | Metabolism               |
| 0.196286707 | Proliferation/Metastasis |
| 0.066084964 | TME                      |
| 0.044688543 | TME                      |
| 0.452532607 | Metabolism               |
| 0.850822909 | Proliferation/Metastasis |
| 0.04283957  | Metabolism               |
| 0.788860571 | TME                      |
| 0.480159572 | TME                      |
| 0.767561074 | TME                      |
| 0.003413126 | TME                      |
| 0.197629799 | Metabolism               |
| 0.198174033 | TME                      |
| 0.052138214 | Proliferation/Metastasis |
| 0.117757465 | TME                      |

|             |                          |
|-------------|--------------------------|
| 0.365369711 | Proliferation/Metastasis |
| 0.37082108  | Proliferation/Metastasis |
| 0.019591852 | Metabolism               |
| 0.741555496 | Proliferation/Metastasis |
| 0.061629492 | TME                      |
| 0.007564056 | Metabolism               |
| 0.520948903 | TME                      |
| 0.018382266 | TME                      |
| 0.035477603 | TME                      |
| 0.099734991 | TME                      |
| 0.604868278 | TME                      |
| 0.146886981 | TME                      |
| 0.136755899 | Metabolism               |
| 0.032680436 | TME                      |
| 0.253813696 | Metabolism               |
| 0.98189895  | Metabolism               |
| 0.122275996 | Proliferation/Metastasis |
| 0.021446502 | Proliferation/Metastasis |
| 0.682328461 | Metabolism               |
| 0.109019784 | Metabolism               |
| 0.856381638 | Metabolism               |
| 0.1356733   | Metabolism               |
| 0.982379207 | Proliferation/Metastasis |
| 0.244300561 | Proliferation/Metastasis |
| 0.228738015 | Metabolism               |
| 0.441772622 | Metabolism               |
| 0.462633884 | Metabolism               |
| 0.445033575 | TME                      |
| 0.932925643 | Metabolism               |
| 0.290609292 | Metabolism               |
| 0.203756792 | Metabolism               |
| 0.021197127 | Metabolism               |
| 0.892804986 | Proliferation/Metastasis |
| 0.794702473 | Metabolism               |
| 0.624356421 | Metabolism               |
| 0.103359375 | Metabolism               |
| 0.770646818 | Metabolism               |
| 0.405624258 | Metabolism               |
| 0.831916276 | Metabolism               |
| 0.472898232 | Proliferation/Metastasis |
| 0.292338618 | Metabolism               |
| 0.358670443 | Metabolism               |
| 0.150828883 | Proliferation/Metastasis |

|             |                          |
|-------------|--------------------------|
| 0.030024154 | Metabolism               |
| 0.015284161 | Metabolism               |
| 0.042972804 | Metabolism               |
| 0.162580761 | Metabolism               |
| 0.380466894 | Metabolism               |
| 0.547437086 | Metabolism               |
| 0.119531552 | Metabolism               |
| 0.247294346 | Metabolism               |
| 0.113682584 | TME                      |
| 0.124356006 | TME                      |
| 0.066014699 | TME                      |
| 0.30638763  | TME                      |
| 0.378398305 | TME                      |
| 0.119111251 | Metabolism               |
| 0.797181015 | Metabolism               |
| 0.019436621 | Proliferation/Metastasis |
| 0.77425206  | Metabolism               |
| 0.100908993 | Proliferation/Metastasis |
| 0.23652329  | Metabolism               |
| 0.069612525 | TME                      |
| 0.536785813 | Metabolism               |
| 0.800295326 | Metabolism               |
| 0.530892844 | Metabolism               |
| 0.392867646 | Metabolism               |
| 0.015821261 | TME                      |
| 0.788440236 | TME                      |
| 0.231373399 | Proliferation/Metastasis |
| 0.354258455 | Metabolism               |
| 0.176495674 | Proliferation/Metastasis |
| 0.018274466 | Proliferation/Metastasis |
| 0.035261176 | TME                      |
| 0.911591801 | TME                      |
| 0.374019354 | TME                      |
| 0.869971553 | TME                      |
| 0.056911856 | Metabolism               |
| 0.016839659 | Proliferation/Metastasis |
| 0.245463545 | Metabolism               |
| 0.043622825 | Metabolism               |
| 0.518554003 | Proliferation/Metastasis |
| 0.082882542 | Proliferation/Metastasis |
| 0.658623531 | Metabolism               |
| 0.061693795 | Metabolism               |
| 0.075165804 | Metabolism               |



|             |                          |
|-------------|--------------------------|
| 0.053401724 | Metabolism               |
| 0.846822786 | TME                      |
| 4.98E-05    | TME                      |
| 0.589285547 | TME                      |
| 0.534209751 | TME                      |
| 0.053087486 | TME                      |
| 0.771806421 | Metabolism               |
| 0.002548648 | Metabolism               |
| 0.559849698 | Metabolism               |
| 0.104643585 | Metabolism               |
| 0.246290708 | Metabolism               |
| 0.000670985 | TME                      |
| 0.024014191 | TME                      |
| 0.311381306 | TME                      |
| 0.995805065 | TME                      |
| 0.24309942  | TME                      |
| 0.480136862 | TME                      |
| 0.544989474 | TME                      |
| 0.609090301 | TME                      |
| 0.477602757 | TME                      |
| 0.288925844 | Proliferation/Metastasis |
| 0.052373268 | Proliferation/Metastasis |
| 0.006900364 | Metabolism               |
| 0.00537323  | Metabolism               |
| 0.217089836 | TME                      |
| 0.655001608 | Metabolism               |
| 0.141022761 | Metabolism               |
| 0.508461212 | TME                      |
| 0.000213065 | Proliferation/Metastasis |
| 0.000842275 | Proliferation/Metastasis |
| 0.755269696 | TME                      |
| 0.351370057 | Metabolism               |
| 0.001129303 | Metabolism               |
| 0.003924146 | Proliferation/Metastasis |
| 0.005080616 | Proliferation/Metastasis |
| 0.300413118 | TME                      |
| 0.181765989 | TME                      |
| 0.534236196 | TME                      |
| 0.454074287 | TME                      |
| 0.004420087 | Proliferation/Metastasis |
| 0.035767059 | TME                      |
| 0.627556544 | TME                      |
| 0.199349199 | Metabolism               |

|             |                          |
|-------------|--------------------------|
| 0.198834377 | TME                      |
| 0.19769575  | TME                      |
| 0.932509441 | TME                      |
| 0.772106501 | TME                      |
| 0.862016778 | Metabolism               |
| 0.26333586  | Metabolism               |
| 0.001029675 | Metabolism               |
| 0.004064063 | TME                      |
| 0.046568778 | Metabolism               |
| 0.361535509 | TME                      |
| 0.67682396  | TME                      |
| 0.614816321 | TME                      |
| 0.421474529 | TME                      |
| 0.138129197 | TME                      |
| 0.043614213 | Metabolism               |
| 0.173636472 | Proliferation/Metastasis |
| 0.562954031 | Metabolism               |
| 0.003601744 | Proliferation/Metastasis |
| 0.057592019 | Metabolism               |
| 0.013380991 | Metabolism               |
| 0.546711141 | Metabolism               |
| 0.334273963 | Metabolism               |
| 0.187523645 | Metabolism               |
| 0.187514882 | Metabolism               |
| 0.01949644  | Metabolism               |
| 0.084372147 | Metabolism               |
| 0.907731998 | Metabolism               |
| 0.034201595 | Metabolism               |
| 0.285508595 | Metabolism               |
| 0.167019713 | Metabolism               |
| 0.105847471 | Metabolism               |
| 0.007275576 | Metabolism               |
| 0.523930583 | TME                      |
| 3.82E-05    | Proliferation/Metastasis |
| 0.426700106 | Metabolism               |
| 0.352473855 | Proliferation/Metastasis |
| 0.952856096 | TME                      |
| 0.391397698 | Proliferation/Metastasis |
| 0.41597439  | Proliferation/Metastasis |
| 0.325380939 | TME                      |
| 0.338225498 | TME                      |
| 0.395681599 | Metabolism               |
| 0.485457071 | Metabolism               |

|             |                          |
|-------------|--------------------------|
| 0.749899615 | Proliferation/Metastasis |
| 3.26E-07    | Proliferation/Metastasis |
| 0.026720064 | Proliferation/Metastasis |
| 0.090009299 | Metabolism               |
| 0.034312361 | Metabolism               |
| 0.086966078 | Metabolism               |
| 0.744344101 | Proliferation/Metastasis |
| 0.465450636 | TME                      |
| 0.272935873 | TME                      |
| 0.815405274 | Metabolism               |
| 0.011427689 | Proliferation/Metastasis |
| 0.525045813 | Metabolism               |
| 0.945621924 | TME                      |
| 0.868537946 | TME                      |
| 0.098486256 | TME                      |
| 0.002274806 | TME                      |
| 0.341834526 | Metabolism               |
| 0.475628071 | TME                      |
| 0.230576159 | Proliferation/Metastasis |
| 0.390929578 | TME                      |
| 0.688374611 | Proliferation/Metastasis |
| 0.003824358 | Proliferation/Metastasis |
| 0.184742966 | Metabolism               |
| 6.88E-05    | Proliferation/Metastasis |
| 0.399532215 | TME                      |
| 0.217551145 | Metabolism               |
| 0.361875829 | TME                      |
| 0.028892016 | TME                      |
| 0.185657979 | TME                      |
| 0.877718745 | TME                      |
| 0.003809602 | TME                      |
| 0.234027672 | TME                      |
| 0.366317741 | Metabolism               |
| 0.294424039 | TME                      |
| 0.760128278 | Metabolism               |
| 0.189438838 | Metabolism               |
| 0.957348803 | Proliferation/Metastasis |
| 0.002136854 | Proliferation/Metastasis |
| 0.017065608 | Metabolism               |
| 0.719712413 | Metabolism               |
| 0.531149028 | Metabolism               |
| 0.002496023 | Metabolism               |
| 0.87516274  | Proliferation/Metastasis |

|             |                          |
|-------------|--------------------------|
| 0.627464121 | Proliferation/Metastasis |
| 0.565891445 | Metabolism               |
| 0.020820224 | Metabolism               |
| 0.001296768 | Metabolism               |
| 0.001426837 | TME                      |
| 0.877905885 | Metabolism               |
| 0.217657054 | Metabolism               |
| 0.557593296 | Metabolism               |
| 0.051277289 | Metabolism               |
| 0.441850199 | Proliferation/Metastasis |
| 0.001024206 | Metabolism               |
| 0.820249226 | Metabolism               |
| 0.288231963 | Metabolism               |
| 4.59E-06    | Metabolism               |
| 5.59E-07    | Metabolism               |
| 0.004732991 | Metabolism               |
| 0.565034326 | Proliferation/Metastasis |
| 0.691919442 | Metabolism               |
| 0.310467705 | Metabolism               |
| 0.003318796 | Proliferation/Metastasis |
| 0.184215179 | Metabolism               |
| 0.184936618 | Metabolism               |
| 0.74411604  | Metabolism               |
| 0.295342152 | Metabolism               |
| 0.019081904 | Metabolism               |
| 0.734469249 | Metabolism               |
| 0.047992623 | Metabolism               |
| 0.165445392 | Metabolism               |
| 0.372904562 | TME                      |
| 0.874744024 | TME                      |
| 0.466404379 | TME                      |
| 0.675839596 | TME                      |
| 0.761011148 | TME                      |
| 0.002278965 | Metabolism               |
| 0.001878096 | Metabolism               |
| 4.96E-05    | Proliferation/Metastasis |
| 0.132131745 | Metabolism               |
| 0.249910763 | Proliferation/Metastasis |
| 0.148563086 | Metabolism               |
| 0.172609006 | TME                      |
| 0.398720452 | Metabolism               |
| 0.009141782 | Metabolism               |
| 0.533761119 | Metabolism               |

|             |                          |
|-------------|--------------------------|
| 0.04431081  | Metabolism               |
| 0.446096778 | TME                      |
| 0.000466158 | TME                      |
| 0.809122001 | Proliferation/Metastasis |
| 0.243050867 | Metabolism               |
| 0.632022992 | Proliferation/Metastasis |
| 0.001910395 | Proliferation/Metastasis |
| 0.084192215 | TME                      |
| 0.712199609 | TME                      |
| 0.494204602 | TME                      |
| 0.883688714 | TME                      |
| 0.784529348 | Metabolism               |
| 0.378013429 | Proliferation/Metastasis |
| 0.51076434  | Metabolism               |
| 0.073118584 | Metabolism               |
| 0.503282843 | Proliferation/Metastasis |
| 0.114824046 | Proliferation/Metastasis |
| 0.649581797 | Metabolism               |
| 0.301468386 | Metabolism               |
| 0.037006441 | Metabolism               |
| 0.311569853 | Metabolism               |
| 0.014149232 | TME                      |
| 0.063453347 | TME                      |
| 0.336633998 | TME                      |
| 0.646280358 | TME                      |
| 0.796254694 | TME                      |
| 0.003132246 | Metabolism               |
| 0.66893715  | Metabolism               |
| 0.11779245  | Metabolism               |
| 0.54128041  | Metabolism               |
| 0.465090145 | Metabolism               |
| 0.236706882 | TME                      |
| 0.041618806 | TME                      |
| 0.344173549 | TME                      |
| 0.950762752 | TME                      |
| 0.606215122 | TME                      |
| 0.680076537 | TME                      |
| 0.840750985 | TME                      |
| 0.74156307  | TME                      |
| 0.586841618 | TME                      |
| 0.316341676 | Proliferation/Metastasis |
| 0.809902735 | Proliferation/Metastasis |
| 0.461095454 | Metabolism               |

|             |                          |
|-------------|--------------------------|
| 0.749671986 | Metabolism               |
| 0.540995313 | TME                      |
| 0.478722888 | Metabolism               |
| 0.351356821 | Metabolism               |
| 0.295850602 | TME                      |
| 0.275046233 | Proliferation/Metastasis |
| 0.328934642 | Proliferation/Metastasis |
| 0.778299487 | TME                      |
| 0.287937922 | Metabolism               |
| 0.248324977 | Metabolism               |
| 0.791664591 | Proliferation/Metastasis |
| 0.093907561 | Proliferation/Metastasis |
| 0.792371113 | TME                      |
| 0.494570833 | TME                      |
| 0.529563009 | TME                      |
| 0.235645344 | TME                      |
| 0.000947091 | Proliferation/Metastasis |
| 0.105556788 | TME                      |
| 0.662825692 | TME                      |
| 0.447208461 | Metabolism               |
| 0.120225551 | TME                      |
| 0.274363374 | TME                      |
| 0.761735563 | TME                      |
| 0.951633637 | TME                      |
| 0.078573729 | Metabolism               |
| 0.7257895   | Metabolism               |
| 0.512364412 | Metabolism               |
| 0.080705758 | TME                      |
| 0.819693129 | Metabolism               |
| 0.919568866 | TME                      |
| 0.439437835 | TME                      |
| 0.496072936 | TME                      |
| 0.763958063 | TME                      |
| 0.327658907 | TME                      |
| 0.278136343 | Metabolism               |
| 0.557826607 | Proliferation/Metastasis |
| 0.82782024  | Metabolism               |
| 0.19778953  | Proliferation/Metastasis |
| 0.674029764 | Metabolism               |
| 0.348935057 | Metabolism               |
| 0.209247767 | Metabolism               |
| 0.506657748 | Metabolism               |
| 0.400850924 | Metabolism               |

|             |                          |
|-------------|--------------------------|
| 0.131481284 | Metabolism               |
| 0.047142799 | Metabolism               |
| 0.040898762 | Metabolism               |
| 0.149527979 | Metabolism               |
| 0.004414793 | Metabolism               |
| 0.413242307 | Metabolism               |
| 0.363168275 | Metabolism               |
| 0.726977549 | Metabolism               |
| 0.452199185 | Metabolism               |
| 0.419559093 | TME                      |
| 0.122064199 | Proliferation/Metastasis |
| 0.425273968 | Metabolism               |
| 0.368565033 | Proliferation/Metastasis |
| 0.485787971 | TME                      |
| 0.147165224 | Proliferation/Metastasis |
| 0.105368426 | Proliferation/Metastasis |
| 0.333924475 | TME                      |
| 0.171048116 | TME                      |
| 0.001669827 | Metabolism               |
| 0.307685296 | Metabolism               |
| 0.014753904 | Proliferation/Metastasis |
| 0.311213441 | Proliferation/Metastasis |
| 0.199210451 | Proliferation/Metastasis |
| 0.829838621 | Metabolism               |
| 0.352645858 | Metabolism               |
| 0.82451065  | Metabolism               |
| 0.209634288 | Proliferation/Metastasis |
| 0.411899789 | TME                      |
| 0.328801188 | TME                      |
| 0.745773797 | Metabolism               |
| 0.04538795  | Proliferation/Metastasis |
| 0.404236439 | Metabolism               |
| 0.582266487 | TME                      |
| 0.795501248 | TME                      |
| 0.311142151 | TME                      |
| 0.080671426 | TME                      |
| 0.1725519   | Metabolism               |
| 0.120893561 | TME                      |
| 0.114599512 | Proliferation/Metastasis |
| 0.437179742 | TME                      |
| 0.863879385 | Proliferation/Metastasis |
| 0.38223278  | Proliferation/Metastasis |
| 0.132990555 | Metabolism               |

|             |                          |
|-------------|--------------------------|
| 0.613709959 | Proliferation/Metastasis |
| 0.396388988 | TME                      |
| 0.26717077  | Metabolism               |
| 0.680831016 | TME                      |
| 0.074124347 | TME                      |
| 0.859778355 | TME                      |
| 0.847896646 | TME                      |
| 0.674555635 | TME                      |
| 0.403842368 | TME                      |
| 0.056444658 | Metabolism               |
| 0.295035523 | TME                      |
| 0.691452783 | Metabolism               |
| 0.357951226 | Metabolism               |
| 0.594989953 | Proliferation/Metastasis |
| 0.731902182 | Proliferation/Metastasis |
| 0.605144321 | Metabolism               |
| 0.84644014  | Metabolism               |
| 0.004545125 | Metabolism               |
| 0.679088351 | Metabolism               |
| 0.349441194 | Proliferation/Metastasis |
| 8.82E-05    | Proliferation/Metastasis |
| 0.434892779 | Metabolism               |
| 0.336838496 | Metabolism               |
| 0.105536829 | Metabolism               |
| 0.245258074 | TME                      |
| 0.955163802 | Metabolism               |
| 0.190774875 | Metabolism               |
| 0.605688462 | Metabolism               |
| 0.104860557 | Metabolism               |
| 0.207427836 | Proliferation/Metastasis |
| 0.282421144 | Metabolism               |
| 0.943055179 | Metabolism               |
| 0.926134316 | Metabolism               |
| 0.824915688 | Metabolism               |
| 0.38282924  | Metabolism               |
| 0.88168492  | Metabolism               |
| 0.849417839 | Proliferation/Metastasis |
| 0.256381943 | Metabolism               |
| 0.310546997 | Metabolism               |
| 0.011095499 | Proliferation/Metastasis |
| 0.702655146 | Metabolism               |
| 0.469035497 | Metabolism               |
| 0.42069736  | Metabolism               |



|             |                          |
|-------------|--------------------------|
| 0.029519386 | Metabolism               |
| 0.184498815 | Metabolism               |
| 0.066971102 | Metabolism               |
| 0.245136506 | Metabolism               |
| 0.573864027 | Metabolism               |
| 0.518087759 | TME                      |
| 0.778989024 | TME                      |
| 0.582035079 | TME                      |
| 0.923074573 | TME                      |
| 0.421960872 | TME                      |
| 0.76800909  | Metabolism               |
| 0.871523597 | Metabolism               |
| 0.099016642 | Proliferation/Metastasis |
| 0.981798709 | Metabolism               |
| 0.304862391 | Proliferation/Metastasis |
| 0.391807283 | Metabolism               |
| 0.42460042  | TME                      |
| 0.730191229 | Metabolism               |
| 0.100094516 | Metabolism               |
| 0.682894125 | Metabolism               |
| 0.219631175 | Metabolism               |
| 0.119085158 | TME                      |
| 0.746970255 | TME                      |
| 0.825340411 | Proliferation/Metastasis |
| 0.69765141  | Metabolism               |
| 0.482387946 | Proliferation/Metastasis |
| 0.087325474 | Proliferation/Metastasis |
| 0.606468659 | TME                      |
| 0.000341512 | TME                      |
| 0.000918796 | TME                      |
| 0.001031785 | TME                      |
| 0.786026052 | Metabolism               |
| 0.000599072 | Proliferation/Metastasis |
| 0.00175262  | Metabolism               |
| 0.000543835 | Metabolism               |
| 0.006241241 | Proliferation/Metastasis |
| 0.024228786 | Proliferation/Metastasis |
| 3.09E-06    | Metabolism               |
| 0.462141969 | Metabolism               |
| 0.526866601 | Metabolism               |
| 0.032768458 | Metabolism               |
| 0.149727458 | TME                      |
| 0.220732195 | TME                      |

|             |                          |
|-------------|--------------------------|
| 8.01E-05    | TME                      |
| 0.095995596 | TME                      |
| 0.000792867 | TME                      |
| 0.873174253 | Metabolism               |
| 0.073959117 | Metabolism               |
| 0.820023319 | Metabolism               |
| 0.113084165 | Metabolism               |
| 0.07735503  | Metabolism               |
| 0.00128112  | TME                      |
| 0.019897685 | TME                      |
| 0.00052218  | TME                      |
| 0.051802407 | TME                      |
| 0.000123244 | TME                      |
| 0.001958482 | TME                      |
| 0.00101855  | TME                      |
| 0.000767767 | TME                      |
| 0.014567039 | TME                      |
| 0.087487127 | Proliferation/Metastasis |
| 0.014515075 | Proliferation/Metastasis |
| 0.96481878  | Metabolism               |
| 0.091875118 | Metabolism               |
| 0.774523767 | TME                      |
| 0.986930654 | Metabolism               |
| 0.648061646 | Metabolism               |
| 0.000299656 | TME                      |
| 0.387531886 | Proliferation/Metastasis |
| 0.953860645 | Proliferation/Metastasis |
| 0.121725425 | TME                      |
| 0.013326441 | Metabolism               |
| 0.00158663  | Metabolism               |
| 0.362078585 | Proliferation/Metastasis |
| 0.264100489 | Proliferation/Metastasis |
| 0.049563677 | TME                      |
| 2.61E-05    | TME                      |
| 0.003553174 | TME                      |
| 0.048105649 | TME                      |
| 0.29063639  | Proliferation/Metastasis |
| 0.276423213 | TME                      |
| 7.12E-05    | TME                      |
| 0.000551402 | Metabolism               |
| 0.000277814 | TME                      |
| 9.99E-06    | TME                      |
| 0.001471332 | TME                      |

|             |                          |
|-------------|--------------------------|
| 0.104786992 | TME                      |
| 0.497769648 | Metabolism               |
| 0.483454541 | Metabolism               |
| 0.069033779 | Metabolism               |
| 0.388441161 | TME                      |
| 0.106039128 | Metabolism               |
| 0.002528367 | TME                      |
| 0.007466984 | TME                      |
| 0.01439717  | TME                      |
| 0.046313437 | TME                      |
| 0.013016781 | TME                      |
| 0.003524598 | Metabolism               |
| 0.088381464 | Proliferation/Metastasis |
| 3.94E-06    | Metabolism               |
| 0.531795846 | Proliferation/Metastasis |
| 0.000428858 | Metabolism               |
| 0.000466554 | Metabolism               |
| 0.00092951  | Metabolism               |
| 0.05498025  | Metabolism               |
| 0.13014106  | Metabolism               |
| 0.785155136 | Metabolism               |
| 0.519042191 | Metabolism               |
| 0.005280701 | Metabolism               |
| 0.011540239 | Metabolism               |
| 0.002346887 | Metabolism               |
| 3.42E-05    | Metabolism               |
| 0.003242857 | Metabolism               |
| 0.255773636 | Metabolism               |
| 0.480564822 | Metabolism               |
| 0.001395854 | TME                      |
| 0.959700964 | Proliferation/Metastasis |
| 0.029508634 | Metabolism               |
| 0.000102142 | Proliferation/Metastasis |
| 0.006071738 | TME                      |
| 5.61E-05    | Proliferation/Metastasis |
| 8.58E-06    | Proliferation/Metastasis |
| 4.24E-06    | TME                      |
| 0.000304277 | TME                      |
| 0.735951081 | Metabolism               |
| 0.2560222   | Metabolism               |
| 0.901312696 | Proliferation/Metastasis |
| 0.092537016 | Proliferation/Metastasis |
| 1.15E-05    | Proliferation/Metastasis |

|             |                          |
|-------------|--------------------------|
| 0.075375166 | Metabolism               |
| 0.266075782 | Metabolism               |
| 0.173636513 | Metabolism               |
| 9.80E-06    | Proliferation/Metastasis |
| 2.07E-05    | TME                      |
| 0.00025831  | TME                      |
| 0.191134977 | Metabolism               |
| 0.846771714 | Proliferation/Metastasis |
| 0.349788847 | Metabolism               |
| 0.001507831 | TME                      |
| 0.003828734 | TME                      |
| 0.703316532 | TME                      |
| 0.026503351 | TME                      |
| 0.006141834 | Metabolism               |
| 5.11E-06    | TME                      |
| 0.118759192 | Proliferation/Metastasis |
| 3.20E-07    | TME                      |
| 0.884162251 | Proliferation/Metastasis |
| 0.026379094 | Proliferation/Metastasis |
| 0.001649288 | Metabolism               |
| 0.70251181  | Proliferation/Metastasis |
| 0.000532484 | TME                      |
| 0.001094448 | Metabolism               |
| 0.000132906 | TME                      |
| 0.000664537 | TME                      |
| 0.009817978 | TME                      |
| 0.000420701 | TME                      |
| 0.000141851 | TME                      |
| 3.79E-05    | TME                      |
| 0.094049205 | Metabolism               |
| 1.19E-07    | TME                      |
| 0.003599242 | Metabolism               |
| 0.025238236 | Metabolism               |
| 6.11E-05    | Proliferation/Metastasis |
| 0.440042035 | Proliferation/Metastasis |
| 0.537233706 | Metabolism               |
| 0.005036999 | Metabolism               |
| 0.645012143 | Metabolism               |
| 0.243609864 | Metabolism               |
| 7.09E-05    | Proliferation/Metastasis |
| 0.84767327  | Proliferation/Metastasis |
| 0.498239242 | Metabolism               |
| 0.033582238 | Metabolism               |

|             |                          |
|-------------|--------------------------|
| 0.001594215 | Metabolism               |
| 0.373444867 | TME                      |
| 0.023862635 | Metabolism               |
| 0.118446651 | Metabolism               |
| 0.874260121 | Metabolism               |
| 0.807549529 | Metabolism               |
| 0.029293709 | Proliferation/Metastasis |
| 0.04713889  | Metabolism               |
| 0.851285744 | Metabolism               |
| 0.031915095 | Metabolism               |
| 0.496515505 | Metabolism               |
| 0.055420397 | Metabolism               |
| 0.763615011 | Metabolism               |
| 0.667136636 | Proliferation/Metastasis |
| 0.022658626 | Metabolism               |
| 6.34E-06    | Metabolism               |
| 0.193628338 | Proliferation/Metastasis |
| 0.928752554 | Metabolism               |
| 0.396965775 | Metabolism               |
| 1.81E-05    | Metabolism               |
| 0.560208336 | Metabolism               |
| 0.025185384 | Metabolism               |
| 0.200938999 | Metabolism               |
| 0.027251947 | Metabolism               |
| 0.111163354 | Metabolism               |
| 0.001089109 | TME                      |
| 2.44E-06    | TME                      |
| 0.000106175 | TME                      |
| 0.000230081 | TME                      |
| 2.84E-05    | TME                      |
| 0.320207579 | Metabolism               |
| 0.649626302 | Metabolism               |
| 0.152512292 | Proliferation/Metastasis |
| 0.523630898 | Metabolism               |
| 7.26E-06    | Proliferation/Metastasis |
| 0.076030483 | Metabolism               |
| 0.156481288 | TME                      |
| 0.0690658   | Metabolism               |
| 0.36282601  | Metabolism               |
| 0.007766237 | Metabolism               |
| 0.601707172 | Metabolism               |
| 0.111475464 | TME                      |
| 0.544177917 | TME                      |

|             |                          |
|-------------|--------------------------|
| 0.000280413 | Proliferation/Metastasis |
| 0.109713278 | Metabolism               |
| 0.001143512 | Proliferation/Metastasis |
| 0.073656244 | Proliferation/Metastasis |
| 0.741501534 | TME                      |
| 0.669020628 | TME                      |
| 0.648673432 | TME                      |
| 0.959033213 | TME                      |
| 0.712488767 | Metabolism               |
| 0.241184406 | Proliferation/Metastasis |
| 0.117811507 | Metabolism               |
| 0.844710427 | Metabolism               |
| 0.912340357 | Proliferation/Metastasis |
| 0.162212414 | Proliferation/Metastasis |
| 0.264757488 | Metabolism               |
| 0.871525896 | Metabolism               |
| 0.752239211 | Metabolism               |
| 0.567863554 | Metabolism               |
| 0.071922861 | TME                      |
| 0.139658457 | TME                      |
| 0.853667742 | TME                      |
| 0.837517763 | TME                      |
| 0.425076412 | TME                      |
| 0.502708761 | Metabolism               |
| 0.785315567 | Metabolism               |
| 0.593019328 | Metabolism               |
| 0.186197222 | Metabolism               |
| 0.161720901 | Metabolism               |
| 0.448605044 | TME                      |
| 0.848623684 | TME                      |
| 0.486873408 | TME                      |
| 0.829082874 | TME                      |
| 0.974698422 | TME                      |
| 0.790745371 | TME                      |
| 0.871149765 | TME                      |
| 0.958554255 | TME                      |
| 0.619875805 | TME                      |
| 0.014818663 | Proliferation/Metastasis |
| 0.110363938 | Proliferation/Metastasis |
| 0.992816397 | Metabolism               |
| 0.794167683 | Metabolism               |
| 0.625268079 | TME                      |
| 0.15364715  | Metabolism               |

|             |                          |
|-------------|--------------------------|
| 0.148954503 | Metabolism               |
| 0.605211657 | TME                      |
| 0.483927043 | Proliferation/Metastasis |
| 0.835918054 | Proliferation/Metastasis |
| 0.849704763 | TME                      |
| 0.07303574  | Metabolism               |
| 0.065967332 | Metabolism               |
| 0.213523333 | Proliferation/Metastasis |
| 0.063032396 | Proliferation/Metastasis |
| 0.624464455 | TME                      |
| 0.453586978 | TME                      |
| 0.879858298 | TME                      |
| 0.306453326 | TME                      |
| 0.116059901 | Proliferation/Metastasis |
| 0.026754055 | TME                      |
| 0.613392271 | TME                      |
| 0.720533365 | Metabolism               |
| 0.167600774 | TME                      |
| 0.404890927 | TME                      |
| 0.789091302 | TME                      |
| 0.827384321 | TME                      |
| 0.624635443 | Metabolism               |
| 0.362773075 | Metabolism               |
| 0.419987989 | Metabolism               |
| 0.017369463 | TME                      |
| 0.35716833  | Metabolism               |
| 0.466822384 | TME                      |
| 0.434867443 | TME                      |
| 0.492287629 | TME                      |
| 0.68942651  | TME                      |
| 0.415925744 | TME                      |
| 0.386643498 | Metabolism               |
| 0.047211    | Proliferation/Metastasis |
| 0.535706455 | Metabolism               |
| 0.100454702 | Proliferation/Metastasis |
| 0.034679022 | Metabolism               |
| 0.016142372 | Metabolism               |
| 0.004362522 | Metabolism               |
| 0.833946208 | Metabolism               |
| 0.706330814 | Metabolism               |
| 0.793579928 | Metabolism               |
| 0.615148363 | Metabolism               |
| 0.931757892 | Metabolism               |

|             |                          |
|-------------|--------------------------|
| 0.919202464 | Metabolism               |
| 0.53020715  | Metabolism               |
| 0.837007845 | Metabolism               |
| 0.271534531 | Metabolism               |
| 0.313552819 | Metabolism               |
| 0.174905644 | Metabolism               |
| 0.569635428 | TME                      |
| 0.107021087 | Proliferation/Metastasis |
| 0.58260065  | Metabolism               |
| 0.594874891 | Proliferation/Metastasis |
| 0.7211729   | TME                      |
| 0.926647659 | Proliferation/Metastasis |
| 0.472210715 | Proliferation/Metastasis |
| 0.896005841 | TME                      |
| 0.702453052 | TME                      |
| 0.195702371 | Metabolism               |
| 0.128369565 | Metabolism               |
| 0.000498747 | Proliferation/Metastasis |
| 0.499025454 | Proliferation/Metastasis |
| 0.425031106 | Proliferation/Metastasis |
| 0.022347968 | Metabolism               |
| 0.152878249 | Metabolism               |
| 0.628674544 | Metabolism               |
| 0.801964114 | Proliferation/Metastasis |
| 0.646035287 | TME                      |
| 0.311494715 | TME                      |
| 0.32667972  | Metabolism               |
| 0.164729909 | Proliferation/Metastasis |
| 0.106368135 | Metabolism               |
| 0.707201336 | TME                      |
| 0.707247943 | TME                      |
| 0.176062476 | TME                      |
| 0.04845494  | TME                      |
| 0.031250869 | Metabolism               |
| 0.36951198  | TME                      |
| 0.055951869 | Proliferation/Metastasis |
| 0.705902947 | TME                      |
| 0.967311213 | Proliferation/Metastasis |
| 0.703086916 | Proliferation/Metastasis |
| 0.927164191 | Metabolism               |
| 0.826645894 | Proliferation/Metastasis |
| 0.384290825 | TME                      |
| 0.985687541 | Metabolism               |



|             |                          |
|-------------|--------------------------|
| 0.968220099 | TME                      |
| 0.65891292  | TME                      |
| 0.281340886 | TME                      |
| 0.631697373 | TME                      |
| 0.960589544 | TME                      |
| 0.899857308 | TME                      |
| 0.492866    | Metabolism               |
| 0.931036805 | TME                      |
| 0.197912165 | Metabolism               |
| 0.336698922 | Metabolism               |
| 0.724586474 | Proliferation/Metastasis |
| 0.419715277 | Proliferation/Metastasis |
| 0.85166197  | Metabolism               |
| 0.695089114 | Metabolism               |
| 0.949307155 | Metabolism               |
| 0.165345133 | Metabolism               |
| 0.351352351 | Proliferation/Metastasis |
| 0.262545836 | Proliferation/Metastasis |
| 0.610478085 | Metabolism               |
| 0.288221011 | Metabolism               |
| 0.269321239 | Metabolism               |
| 0.047804016 | TME                      |
| 0.895950899 | Metabolism               |
| 0.221884093 | Metabolism               |
| 0.815797615 | Metabolism               |
| 0.728693214 | Metabolism               |
| 0.826623906 | Proliferation/Metastasis |
| 0.459673575 | Metabolism               |
| 0.58083829  | Metabolism               |
| 0.647210287 | Metabolism               |
| 0.276134046 | Metabolism               |
| 0.423467256 | Metabolism               |
| 0.935478215 | Metabolism               |
| 0.999751272 | Proliferation/Metastasis |
| 0.196411654 | Metabolism               |
| 0.322426635 | Metabolism               |
| 0.90993653  | Proliferation/Metastasis |
| 0.294685056 | Metabolism               |
| 0.093679313 | Metabolism               |
| 0.189279515 | Metabolism               |
| 0.797671389 | Metabolism               |
| 0.014431109 | Metabolism               |
| 0.348413427 | Metabolism               |

|             |                          |
|-------------|--------------------------|
| 0.427853644 | Metabolism               |
| 0.384307114 | Metabolism               |
| 0.426349702 | TME                      |
| 0.990149336 | TME                      |
| 0.57977758  | TME                      |
| 0.874021776 | TME                      |
| 0.831362431 | TME                      |
| 0.13731664  | Metabolism               |
| 0.014262721 | Metabolism               |
| 0.020662314 | Proliferation/Metastasis |
| 0.67582551  | Metabolism               |
| 0.744760325 | Proliferation/Metastasis |
| 0.075210904 | Metabolism               |
| 0.688721039 | TME                      |
| 0.244467301 | Metabolism               |
| 0.387843825 | Metabolism               |
| 0.941880191 | Metabolism               |
| 0.345974817 | Metabolism               |
| 0.078812315 | TME                      |
| 0.220169039 | TME                      |
| 0.447836548 | Proliferation/Metastasis |
| 0.116040447 | Metabolism               |
| 0.611812808 | Proliferation/Metastasis |
| 0.001287599 | Proliferation/Metastasis |
| 0.028490882 | TME                      |
| 6.17E-06    | TME                      |
| 0.005853488 | TME                      |
| 0.003821658 | TME                      |
| 0.248667619 | Metabolism               |
| 0.000429826 | Proliferation/Metastasis |
| 1.37E-05    | Metabolism               |
| 0.363033585 | Metabolism               |
| 0.254301907 | Proliferation/Metastasis |
| 0.000296007 | Proliferation/Metastasis |
| 7.15E-09    | Metabolism               |
| 0.001314386 | Metabolism               |
| 0.117350144 | Metabolism               |
| 0.188208879 | Metabolism               |
| 0.025851823 | TME                      |
| 3.97E-08    | TME                      |
| 0.006848527 | TME                      |
| 3.47E-06    | TME                      |
| 3.47E-09    | TME                      |

|             |                          |
|-------------|--------------------------|
| 0.42683134  | Metabolism               |
| 0.0143488   | Metabolism               |
| 0.559598241 | Metabolism               |
| 0.050218774 | Metabolism               |
| 0.042026558 | Metabolism               |
| 0.001916825 | TME                      |
| 0.119355274 | TME                      |
| 0.000101407 | TME                      |
| 0.000311445 | TME                      |
| 2.05E-06    | TME                      |
| 0.000167623 | TME                      |
| 0.00040113  | TME                      |
| 0.001458762 | TME                      |
| 0.03487086  | TME                      |
| 0.00627419  | Proliferation/Metastasis |
| 8.03E-07    | Proliferation/Metastasis |
| 0.037817717 | Metabolism               |
| 0.282512247 | Metabolism               |
| 0.000902325 | TME                      |
| 0.099731247 | Metabolism               |
| 8.37E-05    | Metabolism               |
| 1.86E-06    | TME                      |
| 0.849213342 | Proliferation/Metastasis |
| 0.070397965 | Proliferation/Metastasis |
| 0.000887992 | TME                      |
| 0.000501925 | Metabolism               |
| 5.62E-05    | Metabolism               |
| 0.002759554 | Proliferation/Metastasis |
| 0.000637894 | Proliferation/Metastasis |
| 0.012178731 | TME                      |
| 0.000290102 | TME                      |
| 0.000223329 | TME                      |
| 0.001076134 | TME                      |
| 0.282529084 | Proliferation/Metastasis |
| 0.069616583 | TME                      |
| 1.51E-05    | TME                      |
| 0.000630552 | Metabolism               |
| 0.087475232 | TME                      |
| 0.008320999 | TME                      |
| 0.000503225 | TME                      |
| 0.195857751 | TME                      |
| 0.729695303 | Metabolism               |
| 0.407726815 | Metabolism               |

|             |                          |
|-------------|--------------------------|
| 0.116384119 | Metabolism               |
| 0.001044605 | TME                      |
| 0.055862276 | Metabolism               |
| 0.00045686  | TME                      |
| 0.033082183 | TME                      |
| 0.00448371  | TME                      |
| 0.001328107 | TME                      |
| 0.0001824   | TME                      |
| 0.000100713 | Metabolism               |
| 0.000170719 | Proliferation/Metastasis |
| 0.000135797 | Metabolism               |
| 0.021716445 | Proliferation/Metastasis |
| 1.78E-05    | Metabolism               |
| 0.001710899 | Metabolism               |
| 1.88E-05    | Metabolism               |
| 2.94E-06    | Metabolism               |
| 0.083725803 | Metabolism               |
| 0.000126272 | Metabolism               |
| 0.005579972 | Metabolism               |
| 0.00103507  | Metabolism               |
| 1.59E-05    | Metabolism               |
| 1.93E-05    | Metabolism               |
| 1.70E-06    | Metabolism               |
| 0.002825239 | Metabolism               |
| 0.054858881 | Metabolism               |
| 0.517582507 | Metabolism               |
| 0.000369687 | TME                      |
| 0.025647602 | Proliferation/Metastasis |
| 0.079315241 | Metabolism               |
| 0.006647144 | Proliferation/Metastasis |
| 0.001125907 | TME                      |
| 2.17E-06    | Proliferation/Metastasis |
| 6.05E-05    | Proliferation/Metastasis |
| 1.68E-05    | TME                      |
| 9.53E-09    | TME                      |
| 0.014467943 | Metabolism               |
| 0.767051122 | Metabolism               |
| 0.870454957 | Proliferation/Metastasis |
| 0.179845847 | Proliferation/Metastasis |
| 1.87E-06    | Proliferation/Metastasis |
| 0.000611636 | Metabolism               |
| 0.000553268 | Metabolism               |
| 0.002990772 | Metabolism               |

|             |                          |
|-------------|--------------------------|
| 0.000196378 | Proliferation/Metastasis |
| 0.00566478  | TME                      |
| 7.07E-06    | TME                      |
| 0.648637989 | Metabolism               |
| 0.009623879 | Proliferation/Metastasis |
| 0.960341384 | Metabolism               |
| 0.06047811  | TME                      |
| 0.00354878  | TME                      |
| 4.31E-05    | TME                      |
| 0.000560632 | TME                      |
| 4.24E-06    | Metabolism               |
| 0.000756182 | TME                      |
| 5.12E-06    | Proliferation/Metastasis |
| 1.01E-05    | TME                      |
| 0.547966815 | Proliferation/Metastasis |
| 0.824479744 | Proliferation/Metastasis |
| 0.006932989 | Metabolism               |
| 0.004343485 | Proliferation/Metastasis |
| 0.000266302 | TME                      |
| 0.046765352 | Metabolism               |
| 0.002355047 | TME                      |
| 0.000668641 | TME                      |
| 0.809257936 | TME                      |
| 0.000173096 | TME                      |
| 0.09428165  | TME                      |
| 6.34E-05    | TME                      |
| 0.00070273  | Metabolism               |
| 1.69E-06    | TME                      |
| 0.118522241 | Metabolism               |
| 0.405655804 | Metabolism               |
| 0.000675018 | Proliferation/Metastasis |
| 0.013744521 | Proliferation/Metastasis |
| 0.000327333 | Metabolism               |
| 0.024888436 | Metabolism               |
| 0.000137898 | Metabolism               |
| 0.0026203   | Metabolism               |
| 3.44E-06    | Proliferation/Metastasis |
| 0.931505262 | Proliferation/Metastasis |
| 0.167451845 | Metabolism               |
| 0.006041776 | Metabolism               |
| 0.018038464 | Metabolism               |
| 0.001102786 | TME                      |
| 0.001815996 | Metabolism               |

|             |                          |
|-------------|--------------------------|
| 0.010229628 | Metabolism               |
| 0.891944383 | Metabolism               |
| 0.560567361 | Metabolism               |
| 0.011414467 | Proliferation/Metastasis |
| 0.002951911 | Metabolism               |
| 0.233919186 | Metabolism               |
| 3.26E-06    | Metabolism               |
| 0.497178381 | Metabolism               |
| 0.476950993 | Metabolism               |
| 0.237860355 | Metabolism               |
| 0.010721219 | Proliferation/Metastasis |
| 7.66E-05    | Metabolism               |
| 0.037245281 | Metabolism               |
| 0.009660306 | Proliferation/Metastasis |
| 0.004728466 | Metabolism               |
| 3.13E-06    | Metabolism               |
| 0.792677525 | Metabolism               |
| 0.268902367 | Metabolism               |
| 0.022165753 | Metabolism               |
| 0.000914417 | Metabolism               |
| 0.619756261 | Metabolism               |
| 0.392601162 | Metabolism               |
| 7.07E-05    | TME                      |
| 0.002505305 | TME                      |
| 0.00287207  | TME                      |
| 0.000615344 | TME                      |
| 6.00E-05    | TME                      |
| 0.072920556 | Metabolism               |
| 0.796534823 | Metabolism               |
| 0.872653906 | Proliferation/Metastasis |
| 0.036878378 | Metabolism               |
| 0.000214043 | Proliferation/Metastasis |
| 0.005013359 | Metabolism               |
| 0.127498222 | TME                      |
| 0.001536077 | Metabolism               |
| 0.747424126 | Metabolism               |
| 4.93E-08    | Metabolism               |
| 0.016033337 | Metabolism               |
| 1.11E-07    | TME                      |
| 0.000863333 | TME                      |
| 1.04E-05    | Proliferation/Metastasis |
| 0.000183362 | Metabolism               |
| 0.402503203 | Proliferation/Metastasis |

|             |                          |
|-------------|--------------------------|
| 0.280366363 | Proliferation/Metastasis |
| 0.865030019 | TME                      |
| 0.164065627 | TME                      |
| 0.000573729 | TME                      |
| 0.003866789 | TME                      |
| 0.797623191 | Metabolism               |
| 0.250407691 | Proliferation/Metastasis |
| 0.001005045 | Metabolism               |
| 0.083769405 | Metabolism               |
| 0.339539556 | Proliferation/Metastasis |
| 0.750328593 | Proliferation/Metastasis |
| 1.77E-06    | Metabolism               |
| 4.33E-05    | Metabolism               |
| 0.00030117  | Metabolism               |
| 0.000505268 | Metabolism               |
| 0.059031904 | TME                      |
| 0.3304123   | TME                      |
| 0.000688948 | TME                      |
| 0.193496802 | TME                      |
| 0.005685415 | TME                      |
| 0.000210104 | Metabolism               |
| 0.173931538 | Metabolism               |
| 0.000581566 | Metabolism               |
| 0.438775319 | Metabolism               |
| 3.05E-06    | Metabolism               |
| 0.007094361 | TME                      |
| 0.489393642 | TME                      |
| 0.014013775 | TME                      |
| 0.042140474 | TME                      |
| 0.379626632 | TME                      |
| 0.011735837 | TME                      |
| 0.008605223 | TME                      |
| 0.002573921 | TME                      |
| 0.000941321 | TME                      |
| 0.001304207 | Proliferation/Metastasis |
| 2.69E-06    | Proliferation/Metastasis |
| 0.02705607  | Metabolism               |
| 0.058426256 | Metabolism               |
| 0.088368754 | TME                      |
| 0.826004144 | Metabolism               |
| 0.006928111 | Metabolism               |
| 0.150393457 | TME                      |
| 0.205034067 | Proliferation/Metastasis |

|             |                          |
|-------------|--------------------------|
| 0.953482375 | Proliferation/Metastasis |
| 0.163339376 | TME                      |
| 5.17E-09    | Metabolism               |
| 1.20E-06    | Metabolism               |
| 0.071260951 | Proliferation/Metastasis |
| 0.019573357 | Proliferation/Metastasis |
| 0.000263737 | TME                      |
| 0.008158819 | TME                      |
| 0.00574367  | TME                      |
| 0.005509645 | TME                      |
| 2.77E-06    | Proliferation/Metastasis |
| 0.002738547 | TME                      |
| 0.017455509 | TME                      |
| 0.616873399 | Metabolism               |
| 0.000161918 | TME                      |
| 0.001135658 | TME                      |
| 0.005253835 | TME                      |
| 1.73E-05    | TME                      |
| 0.153298502 | Metabolism               |
| 0.552097062 | Metabolism               |
| 0.710891098 | Metabolism               |
| 0.074372004 | TME                      |
| 0.000365888 | Metabolism               |
| 0.012997774 | TME                      |
| 0.766055963 | TME                      |
| 0.001928346 | TME                      |
| 0.015916695 | TME                      |
| 0.920291589 | TME                      |
| 0.008543129 | Metabolism               |
| 0.001282091 | Proliferation/Metastasis |
| 0.013052464 | Metabolism               |
| 0.020968327 | Proliferation/Metastasis |
| 0.072979857 | Metabolism               |
| 0.001775965 | Metabolism               |
| 0.046311086 | Metabolism               |
| 0.000149805 | Metabolism               |
| 0.022994876 | Metabolism               |
| 0.011992504 | Metabolism               |
| 0.856149475 | Metabolism               |
| 0.001335616 | Metabolism               |
| 0.007130433 | Metabolism               |
| 0.006345016 | Metabolism               |
| 0.000218235 | Metabolism               |



|             |                          |
|-------------|--------------------------|
| 1.95E-05    | Metabolism               |
| 0.000151263 | Metabolism               |
| 0.522837685 | Metabolism               |
| 0.003987814 | TME                      |
| 0.758683997 | Proliferation/Metastasis |
| 4.22E-06    | Metabolism               |
| 0.007331244 | Proliferation/Metastasis |
| 0.009506018 | TME                      |
| 0.97654451  | Proliferation/Metastasis |
| 0.101531927 | Proliferation/Metastasis |
| 0.449101222 | TME                      |
| 0.160129053 | TME                      |
| 1.13E-05    | Metabolism               |
| 0.00025967  | Metabolism               |
| 0.068703796 | Proliferation/Metastasis |
| 6.89E-06    | Proliferation/Metastasis |
| 0.622357042 | Proliferation/Metastasis |
| 0.000119006 | Metabolism               |
| 0.047221672 | Metabolism               |
| 0.009595867 | Metabolism               |
| 0.831944785 | Proliferation/Metastasis |
| 0.004608123 | TME                      |
| 0.145556115 | TME                      |
| 0.325200122 | Metabolism               |
| 0.945938082 | Proliferation/Metastasis |
| 0.118239515 | Metabolism               |
| 8.91E-05    | TME                      |
| 0.011785916 | TME                      |
| 0.708690734 | TME                      |
| 0.009649882 | TME                      |
| 4.69E-08    | Metabolism               |
| 0.482708248 | TME                      |
| 0.002653953 | Proliferation/Metastasis |
| 0.024456004 | TME                      |
| 0.077398176 | Proliferation/Metastasis |
| 0.001008093 | Proliferation/Metastasis |
| 0.241988364 | Metabolism               |
| 0.040122012 | Proliferation/Metastasis |
| 0.003880101 | TME                      |
| 0.958373972 | Metabolism               |
| 0.052684826 | TME                      |
| 0.758076749 | TME                      |
| 0.11314008  | TME                      |

|             |                          |
|-------------|--------------------------|
| 0.006368967 | TME                      |
| 7.01E-08    | TME                      |
| 0.03696114  | TME                      |
| 0.661544847 | Metabolism               |
| 0.070525624 | TME                      |
| 0.048342335 | Metabolism               |
| 0.81904361  | Metabolism               |
| 0.058357299 | Proliferation/Metastasis |
| 0.059605585 | Proliferation/Metastasis |
| 5.24E-06    | Metabolism               |
| 0.074305318 | Metabolism               |
| 1.44E-05    | Metabolism               |
| 0.034439471 | Metabolism               |
| 0.003131758 | Proliferation/Metastasis |
| 0.094837226 | Proliferation/Metastasis |
| 0.052685411 | Metabolism               |
| 0.000569874 | Metabolism               |
| 0.000208122 | Metabolism               |
| 0.177082005 | TME                      |
| 1.72E-09    | Metabolism               |
| 1.13E-07    | Metabolism               |
| 0.077294105 | Metabolism               |
| 0.470628026 | Metabolism               |
| 0.380004044 | Proliferation/Metastasis |
| 1.77E-07    | Metabolism               |
| 0.00069563  | Metabolism               |
| 0.000549318 | Metabolism               |
| 0.497891936 | Metabolism               |
| 0.685338097 | Metabolism               |
| 0.350979417 | Metabolism               |
| 0.159398004 | Proliferation/Metastasis |
| 1.74E-08    | Metabolism               |
| 0.001235676 | Metabolism               |
| 0.533819385 | Proliferation/Metastasis |
| 5.72E-06    | Metabolism               |
| 0.000170178 | Metabolism               |
| 0.800063302 | Metabolism               |
| 0.740472976 | Metabolism               |
| 0.030672874 | Metabolism               |
| 1.43E-07    | Metabolism               |
| 0.79686718  | Metabolism               |
| 0.905881675 | Metabolism               |
| 0.009400497 | TME                      |

|             |                          |
|-------------|--------------------------|
| 0.002195448 | TME                      |
| 0.005452732 | TME                      |
| 0.037723381 | TME                      |
| 0.021232232 | TME                      |
| 0.970467193 | Metabolism               |
| 0.574453993 | Metabolism               |
| 0.182651467 | Proliferation/Metastasis |
| 0.040408145 | Metabolism               |
| 0.916311985 | Proliferation/Metastasis |
| 3.55E-07    | Metabolism               |
| 0.504599668 | TME                      |
| 3.85E-13    | Metabolism               |
| 0.354155019 | Metabolism               |
| 0.747726336 | Metabolism               |
| 0.381160686 | Metabolism               |
| 0.00609889  | TME                      |
| 0.428107984 | TME                      |
| 0.321157337 | Proliferation/Metastasis |
| 5.78E-05    | Metabolism               |
| 0.026799852 | Proliferation/Metastasis |
| 0.017863449 | Proliferation/Metastasis |
| 0.340056749 | TME                      |
| 0.96633192  | TME                      |
| 0.930616634 | TME                      |
| 0.379139881 | TME                      |
| 0.411029235 | Metabolism               |
| 0.150701732 | Proliferation/Metastasis |
| 0.013633867 | Metabolism               |
| 0.004258852 | Metabolism               |
| 0.694498535 | Proliferation/Metastasis |
| 0.00781889  | Proliferation/Metastasis |
| 0.010966727 | Metabolism               |
| 0.417224803 | Metabolism               |
| 0.61827695  | Metabolism               |
| 0.22846022  | Metabolism               |
| 0.626575581 | TME                      |
| 0.722038585 | TME                      |
| 0.570810594 | TME                      |
| 0.917957599 | TME                      |
| 0.598317203 | TME                      |
| 0.003084183 | Metabolism               |
| 0.048791267 | Metabolism               |
| 0.4261986   | Metabolism               |

|             |                          |
|-------------|--------------------------|
| 0.341223381 | Metabolism               |
| 0.082650882 | Metabolism               |
| 0.028132214 | TME                      |
| 0.003285048 | TME                      |
| 0.429811392 | TME                      |
| 0.859261286 | TME                      |
| 0.538005851 | TME                      |
| 0.763435492 | TME                      |
| 0.857914886 | TME                      |
| 0.458136266 | TME                      |
| 0.911603242 | TME                      |
| 3.30E-07    | Proliferation/Metastasis |
| 0.019482505 | Proliferation/Metastasis |
| 0.028494695 | Metabolism               |
| 0.07655518  | Metabolism               |
| 0.365048389 | TME                      |
| 0.271244188 | Metabolism               |
| 0.705541112 | Metabolism               |
| 0.932192824 | TME                      |
| 0.631089177 | Proliferation/Metastasis |
| 0.000434104 | Proliferation/Metastasis |
| 0.709373263 | TME                      |
| 0.00337717  | Metabolism               |
| 0.71682474  | Metabolism               |
| 2.83E-07    | Proliferation/Metastasis |
| 0.444061393 | Proliferation/Metastasis |
| 0.542427493 | TME                      |
| 0.237707718 | TME                      |
| 0.762427311 | TME                      |
| 0.88889812  | TME                      |
| 9.09E-05    | Proliferation/Metastasis |
| 0.018088461 | TME                      |
| 0.486327453 | TME                      |
| 0.275708742 | Metabolism               |
| 0.672631353 | TME                      |
| 0.347557714 | TME                      |
| 0.656743993 | TME                      |
| 0.039218335 | TME                      |
| 0.003743749 | Metabolism               |
| 0.030336272 | Metabolism               |
| 0.913795536 | Metabolism               |
| 0.188025463 | TME                      |
| 0.427798333 | Metabolism               |

|             |                          |
|-------------|--------------------------|
| 0.923822227 | TME                      |
| 0.262051722 | TME                      |
| 0.807092417 | TME                      |
| 0.31779761  | TME                      |
| 0.742382509 | TME                      |
| 0.845746612 | Metabolism               |
| 1.03E-06    | Proliferation/Metastasis |
| 0.620467404 | Metabolism               |
| 0.014872433 | Proliferation/Metastasis |
| 0.432496936 | Metabolism               |
| 0.020266617 | Metabolism               |
| 0.586622063 | Metabolism               |
| 0.931121499 | Metabolism               |
| 0.411029623 | Metabolism               |
| 0.092169085 | Metabolism               |
| 0.447843962 | Metabolism               |
| 0.032675524 | Metabolism               |
| 0.06688708  | Metabolism               |
| 0.945842686 | Metabolism               |
| 0.780407999 | Metabolism               |
| 0.000594146 | Metabolism               |
| 0.050101918 | Metabolism               |
| 0.20723496  | Metabolism               |
| 0.252933502 | TME                      |
| 0.971861726 | Proliferation/Metastasis |
| 0.000188128 | Metabolism               |
| 0.139699155 | Proliferation/Metastasis |
| 0.552597986 | TME                      |
| 0.578914155 | Proliferation/Metastasis |
| 0.530378174 | Proliferation/Metastasis |
| 0.986518985 | TME                      |
| 0.533353337 | TME                      |
| 0.259026632 | Metabolism               |
| 0.423443695 | Metabolism               |
| 4.24E-09    | Proliferation/Metastasis |
| 0.00032161  | Proliferation/Metastasis |
| 0.6937077   | Proliferation/Metastasis |
| 0.006316645 | Metabolism               |
| 0.523553019 | Metabolism               |
| 0.002996203 | Metabolism               |
| 0.464533724 | Proliferation/Metastasis |
| 0.426149752 | TME                      |
| 0.931828675 | TME                      |

|             |                          |
|-------------|--------------------------|
| 0.104935414 | Metabolism               |
| 0.243157242 | Proliferation/Metastasis |
| 0.247347365 | Metabolism               |
| 0.945583729 | TME                      |
| 0.849899082 | TME                      |
| 0.006282443 | TME                      |
| 0.048575285 | TME                      |
| 0.033089803 | Metabolism               |
| 0.026804208 | TME                      |
| 0.020134819 | Proliferation/Metastasis |
| 0.274485099 | TME                      |
| 0.461258862 | Proliferation/Metastasis |
| 3.15E-08    | Proliferation/Metastasis |
| 0.257616208 | Metabolism               |
| 5.90E-05    | Proliferation/Metastasis |
| 0.745963631 | TME                      |
| 0.003298984 | Metabolism               |
| 0.782520393 | TME                      |
| 0.001388941 | TME                      |
| 0.796609433 | TME                      |
| 0.549102053 | TME                      |
| 0.065137629 | TME                      |
| 0.918251305 | TME                      |
| 0.348545868 | Metabolism               |
| 0.105834415 | TME                      |
| 0.241285218 | Metabolism               |
| 0.000456989 | Metabolism               |
| 0.945929757 | Proliferation/Metastasis |
| 0.078495548 | Proliferation/Metastasis |
| 0.012174563 | Metabolism               |
| 3.71E-05    | Metabolism               |
| 0.011217813 | Metabolism               |
| 0.155445758 | Metabolism               |
| 0.074836794 | Proliferation/Metastasis |
| 0.518546776 | Proliferation/Metastasis |
| 0.189911205 | Metabolism               |
| 0.442026353 | Metabolism               |
| 0.915982966 | Metabolism               |
| 0.007606171 | TME                      |
| 0.125658416 | Metabolism               |
| 0.021409732 | Metabolism               |
| 0.275172209 | Metabolism               |
| 0.579068541 | Metabolism               |

|             |                          |
|-------------|--------------------------|
| 0.91423218  | Proliferation/Metastasis |
| 0.691407429 | Metabolism               |
| 0.013273207 | Metabolism               |
| 0.77656088  | Metabolism               |
| 9.43E-05    | Metabolism               |
| 0.000109523 | Metabolism               |
| 0.573734153 | Metabolism               |
| 8.46E-06    | Proliferation/Metastasis |
| 0.057990816 | Metabolism               |
| 0.013152828 | Metabolism               |
| 0.371068251 | Proliferation/Metastasis |
| 1.13E-05    | Metabolism               |
| 0.88509158  | Metabolism               |
| 0.049850733 | Metabolism               |
| 0.849415452 | Metabolism               |
| 0.04402758  | Metabolism               |
| 0.414682686 | Metabolism               |
| 0.000189435 | Metabolism               |
| 0.425891316 | Metabolism               |
| 0.545964573 | TME                      |
| 0.858919498 | TME                      |
| 0.64586253  | TME                      |
| 0.608624529 | TME                      |
| 0.935271604 | TME                      |
| 0.312848704 | Metabolism               |
| 0.336682427 | Metabolism               |
| 0.533146634 | Proliferation/Metastasis |
| 0.559792755 | Metabolism               |
| 0.399790889 | Proliferation/Metastasis |
| 0.004457137 | Metabolism               |
| 0.071489005 | TME                      |
| 0.020808839 | Metabolism               |
| 0.059127721 | Metabolism               |
| 0.007191265 | Metabolism               |
| 0.430107568 | Metabolism               |
| 0.958558355 | TME                      |
| 0.317647829 | TME                      |
| 0.772084538 | Proliferation/Metastasis |
| 0.830929954 | Metabolism               |
| 0.902106278 | Proliferation/Metastasis |
| 0.88532561  | Proliferation/Metastasis |
| 0.388994022 | TME                      |
| 0.217728397 | TME                      |

|             |                          |
|-------------|--------------------------|
| 0.464479268 | TME                      |
| 0.187828855 | TME                      |
| 0.220786668 | Metabolism               |
| 0.03607327  | Proliferation/Metastasis |
| 0.026214028 | Metabolism               |
| 0.026173546 | Metabolism               |
| 0.40629591  | Proliferation/Metastasis |
| 0.307430478 | Proliferation/Metastasis |
| 0.013355057 | Metabolism               |
| 0.000781958 | Metabolism               |
| 0.702722262 | Metabolism               |
| 0.015357079 | Metabolism               |
| 0.030023775 | TME                      |
| 0.570596542 | TME                      |
| 0.477070475 | TME                      |
| 0.304258157 | TME                      |
| 0.05000774  | TME                      |
| 0.087480256 | Metabolism               |
| 0.015924231 | Metabolism               |
| 0.822118957 | Metabolism               |
| 0.303655561 | Metabolism               |
| 0.278344007 | Metabolism               |
| 0.643076698 | TME                      |
| 0.44157958  | TME                      |
| 0.423201506 | TME                      |
| 0.19815841  | TME                      |
| 0.038293721 | TME                      |
| 0.211680044 | TME                      |
| 0.202927331 | TME                      |
| 0.484665799 | TME                      |
| 0.627378228 | TME                      |
| 0.833850534 | Proliferation/Metastasis |
| 0.442296598 | Proliferation/Metastasis |
| 0.291603562 | Metabolism               |
| 0.163833105 | Metabolism               |
| 0.440866094 | TME                      |
| 0.526628714 | Metabolism               |
| 0.000259467 | Metabolism               |
| 0.388422966 | TME                      |
| 0.387014586 | Proliferation/Metastasis |
| 0.976588801 | Proliferation/Metastasis |
| 0.168814749 | TME                      |
| 0.04122751  | Metabolism               |



|             |                          |
|-------------|--------------------------|
| 0.01534755  | Metabolism               |
| 0.626447133 | Proliferation/Metastasis |
| 0.154262144 | Proliferation/Metastasis |
| 0.756874057 | TME                      |
| 0.411186741 | TME                      |
| 0.25889838  | TME                      |
| 0.285080175 | TME                      |
| 0.097047085 | Proliferation/Metastasis |
| 0.124277154 | TME                      |
| 0.169255684 | TME                      |
| 0.000473036 | Metabolism               |
| 0.997442873 | TME                      |
| 0.529546136 | TME                      |
| 0.169311936 | TME                      |
| 0.278215573 | TME                      |
| 0.868211579 | Metabolism               |
| 0.855433618 | Metabolism               |
| 0.001793451 | Metabolism               |
| 0.454332116 | TME                      |
| 0.177254446 | Metabolism               |
| 0.260044089 | TME                      |
| 0.562009827 | TME                      |
| 0.157390795 | TME                      |
| 0.396622976 | TME                      |
| 0.025200887 | TME                      |
| 0.017372692 | Metabolism               |
| 0.814636128 | Proliferation/Metastasis |
| 0.000373631 | Metabolism               |
| 0.329506652 | Proliferation/Metastasis |
| 0.003296555 | Metabolism               |
| 0.008206923 | Metabolism               |
| 0.035744605 | Metabolism               |
| 0.025863696 | Metabolism               |
| 0.004928036 | Metabolism               |
| 0.042796212 | Metabolism               |
| 0.005299129 | Metabolism               |
| 0.022759721 | Metabolism               |
| 0.411360967 | Metabolism               |
| 0.169150851 | Metabolism               |
| 0.554465924 | Metabolism               |
| 0.018398826 | Metabolism               |
| 0.705443794 | Metabolism               |
| 0.342026378 | Metabolism               |

|             |                          |
|-------------|--------------------------|
| 0.489163636 | TME                      |
| 0.069319035 | Proliferation/Metastasis |
| 0.139493769 | Metabolism               |
| 0.093056475 | Proliferation/Metastasis |
| 0.256291147 | TME                      |
| 0.021237675 | Proliferation/Metastasis |
| 0.120886267 | Proliferation/Metastasis |
| 0.077437802 | TME                      |
| 0.110179387 | TME                      |
| 0.45615994  | Metabolism               |
| 0.806622039 | Metabolism               |
| 0.207915821 | Proliferation/Metastasis |
| 0.522394789 | Proliferation/Metastasis |
| 0.303742788 | Proliferation/Metastasis |
| 0.00149737  | Metabolism               |
| 0.059739288 | Metabolism               |
| 0.38715581  | Metabolism               |
| 0.002091304 | Proliferation/Metastasis |
| 0.723233243 | TME                      |
| 0.602334339 | TME                      |
| 0.869299744 | Metabolism               |
| 0.057763684 | Proliferation/Metastasis |
| 0.080363076 | Metabolism               |
| 0.853176817 | TME                      |
| 0.384480729 | TME                      |
| 0.294067429 | TME                      |
| 0.806869553 | TME                      |
| 0.018445155 | Metabolism               |
| 0.081347211 | TME                      |
| 0.49106544  | Proliferation/Metastasis |
| 0.290040301 | TME                      |
| 0.979326265 | Proliferation/Metastasis |
| 0.06385198  | Proliferation/Metastasis |
| 0.888064058 | Metabolism               |
| 0.534024395 | Proliferation/Metastasis |
| 0.484932235 | TME                      |
| 0.004416708 | Metabolism               |
| 0.237390253 | TME                      |
| 0.475648089 | TME                      |
| 0.055766725 | TME                      |
| 0.385619357 | TME                      |
| 0.237533379 | TME                      |
| 0.218018256 | TME                      |

|             |                          |
|-------------|--------------------------|
| 0.309925476 | Metabolism               |
| 0.140382379 | TME                      |
| 0.607036034 | Metabolism               |
| 0.638894562 | Metabolism               |
| 0.206762526 | Proliferation/Metastasis |
| 0.120021303 | Proliferation/Metastasis |
| 0.02463574  | Metabolism               |
| 0.815732783 | Metabolism               |
| 0.078091456 | Metabolism               |
| 0.019315002 | Metabolism               |
| 0.006645541 | Proliferation/Metastasis |
| 0.701338343 | Proliferation/Metastasis |
| 0.213381452 | Metabolism               |
| 0.016924203 | Metabolism               |
| 0.003767342 | Metabolism               |
| 0.441780813 | TME                      |
| 0.052485967 | Metabolism               |
| 0.5136913   | Metabolism               |
| 0.037186976 | Metabolism               |
| 0.612414578 | Metabolism               |
| 0.035669893 | Proliferation/Metastasis |
| 0.01213459  | Metabolism               |
| 0.914471028 | Metabolism               |
| 0.041828504 | Metabolism               |
| 0.041990178 | Metabolism               |
| 0.451883331 | Metabolism               |
| 0.985498129 | Metabolism               |
| 0.007430348 | Proliferation/Metastasis |
| 0.032180406 | Metabolism               |
| 0.013358682 | Metabolism               |
| 0.75624907  | Proliferation/Metastasis |
| 0.296987643 | Metabolism               |
| 0.257058896 | Metabolism               |
| 0.015224469 | Metabolism               |
| 0.030712984 | Metabolism               |
| 0.079668906 | Metabolism               |
| 0.000666762 | Metabolism               |
| 0.036923064 | Metabolism               |
| 0.79660945  | Metabolism               |
| 0.146881451 | TME                      |
| 0.576864423 | TME                      |
| 0.596866655 | TME                      |
| 0.561175169 | TME                      |

|             |                          |
|-------------|--------------------------|
| 0.283095138 | TME                      |
| 0.759442548 | Metabolism               |
| 0.183080915 | Metabolism               |
| 0.627218005 | Proliferation/Metastasis |
| 0.006348792 | Metabolism               |
| 0.100908044 | Proliferation/Metastasis |
| 0.291463298 | Metabolism               |
| 0.375239087 | TME                      |
| 0.036156778 | Metabolism               |
| 0.977089215 | Metabolism               |
| 0.340853726 | Metabolism               |
| 0.253208523 | Metabolism               |
| 0.044089747 | TME                      |
| 0.196231891 | TME                      |
| 0.015743785 | Proliferation/Metastasis |
| 0.19196583  | Metabolism               |
| 0.067885733 | Proliferation/Metastasis |
| 0.580693099 | Proliferation/Metastasis |
| 0.004118336 | TME                      |
| 0.004771467 | TME                      |
| 0.149279459 | TME                      |
| 0.024301793 | TME                      |
| 0.835383577 | Metabolism               |
| 2.87E-05    | Proliferation/Metastasis |
| 0.010340083 | Metabolism               |
| 0.008739501 | Metabolism               |
| 0.191020758 | Proliferation/Metastasis |
| 0.022020095 | Proliferation/Metastasis |
| 0.007158687 | Metabolism               |
| 0.03782416  | Metabolism               |
| 0.770960899 | Metabolism               |
| 0.461160174 | Metabolism               |
| 0.571113712 | TME                      |
| 0.022182313 | TME                      |
| 0.04978408  | TME                      |
| 0.001285788 | TME                      |
| 0.001227806 | TME                      |
| 0.838505462 | Metabolism               |
| 0.038974423 | Metabolism               |
| 0.924442383 | Metabolism               |
| 0.026239539 | Metabolism               |
| 0.359325307 | Metabolism               |
| 0.001105774 | TME                      |

|             |                          |
|-------------|--------------------------|
| 0.240331839 | TME                      |
| 0.000635599 | TME                      |
| 0.03932797  | TME                      |
| 0.052496598 | TME                      |
| 0.013441284 | TME                      |
| 0.016451419 | TME                      |
| 0.009871652 | TME                      |
| 0.1331228   | TME                      |
| 0.157036631 | Proliferation/Metastasis |
| 0.00378192  | Proliferation/Metastasis |
| 0.685796    | Metabolism               |
| 0.630874342 | Metabolism               |
| 0.000349131 | TME                      |
| 0.821198404 | Metabolism               |
| 0.059930836 | Metabolism               |
| 0.001496462 | TME                      |
| 0.241816662 | Proliferation/Metastasis |
| 0.084111249 | Proliferation/Metastasis |
| 0.031328958 | TME                      |
| 0.444412924 | Metabolism               |
| 0.078816647 | Metabolism               |
| 0.134288464 | Proliferation/Metastasis |
| 0.367994264 | Proliferation/Metastasis |
| 0.1811942   | TME                      |
| 0.003359052 | TME                      |
| 0.054252215 | TME                      |
| 0.118327364 | TME                      |
| 0.081968342 | Proliferation/Metastasis |
| 0.164511071 | TME                      |
| 0.000719514 | TME                      |
| 0.121425823 | Metabolism               |
| 0.024573232 | TME                      |
| 0.002317322 | TME                      |
| 0.005404055 | TME                      |
| 0.140877396 | TME                      |
| 0.066094248 | Metabolism               |
| 0.493181535 | Metabolism               |
| 0.018201676 | Metabolism               |
| 0.045043611 | TME                      |
| 0.004261005 | Metabolism               |
| 0.051618558 | TME                      |
| 0.745534506 | TME                      |
| 0.027603335 | TME                      |

|             |                          |
|-------------|--------------------------|
| 0.003495768 | TME                      |
| 0.054582823 | TME                      |
| 0.006311686 | Metabolism               |
| 0.041785    | Proliferation/Metastasis |
| 0.003172205 | Metabolism               |
| 0.044195892 | Proliferation/Metastasis |
| 0.005324512 | Metabolism               |
| 0.004029842 | Metabolism               |
| 0.002243455 | Metabolism               |
| 0.005190659 | Metabolism               |
| 0.008654273 | Metabolism               |
| 0.169064408 | Metabolism               |
| 0.931828943 | Metabolism               |
| 0.024806572 | Metabolism               |
| 0.056662308 | Metabolism               |
| 0.000771536 | Metabolism               |
| 0.001890423 | Metabolism               |
| 0.19888789  | Metabolism               |
| 0.627804207 | Metabolism               |
| 0.692003    | Metabolism               |
| 0.004496351 | TME                      |
| 0.531601164 | Proliferation/Metastasis |
| 0.740374543 | Metabolism               |
| 0.006157109 | Proliferation/Metastasis |
| 0.002853344 | TME                      |
| 0.000237075 | Proliferation/Metastasis |
| 0.0014017   | Proliferation/Metastasis |
| 0.013716357 | TME                      |
| 0.003358108 | TME                      |
| 0.333260556 | Metabolism               |
| 0.09536224  | Metabolism               |
| 0.238924458 | Proliferation/Metastasis |
| 0.912855747 | Proliferation/Metastasis |
| 0.004183715 | Proliferation/Metastasis |
| 0.068099433 | Metabolism               |
| 0.115017642 | Metabolism               |
| 0.002341561 | Metabolism               |
| 0.000431303 | Proliferation/Metastasis |
| 0.028339053 | TME                      |
| 0.060757158 | TME                      |
| 0.317068751 | Metabolism               |
| 0.000648626 | Proliferation/Metastasis |
| 0.503229064 | Metabolism               |

|             |                          |
|-------------|--------------------------|
| 0.384463238 | TME                      |
| 0.049279878 | TME                      |
| 0.000150678 | TME                      |
| 0.007190445 | TME                      |
| 0.135653001 | Metabolism               |
| 0.051495135 | TME                      |
| 0.001244289 | Proliferation/Metastasis |
| 5.70E-05    | TME                      |
| 0.968984612 | Proliferation/Metastasis |
| 0.047009199 | Proliferation/Metastasis |
| 0.490205769 | Metabolism               |
| 0.087769384 | Proliferation/Metastasis |
| 0.020295266 | TME                      |
| 0.030004918 | Metabolism               |
| 0.083880468 | TME                      |
| 0.967691449 | TME                      |
| 0.476011062 | TME                      |
| 0.012554707 | TME                      |
| 0.846942479 | TME                      |
| 0.067097033 | TME                      |
| 2.26E-05    | Metabolism               |
| 2.58E-05    | TME                      |
| 0.537271816 | Metabolism               |
| 0.277518601 | Metabolism               |
| 0.025766306 | Proliferation/Metastasis |
| 0.014579255 | Proliferation/Metastasis |
| 0.020131525 | Metabolism               |
| 0.470242964 | Metabolism               |
| 0.078476527 | Metabolism               |
| 0.00012047  | Metabolism               |
| 0.000196259 | Proliferation/Metastasis |
| 0.39499546  | Proliferation/Metastasis |
| 0.626386461 | Metabolism               |
| 0.642561071 | Metabolism               |
| 0.124491324 | Metabolism               |
| 0.009534538 | TME                      |
| 0.017679884 | Metabolism               |
| 0.0026857   | Metabolism               |
| 0.393804341 | Metabolism               |
| 0.00012583  | Metabolism               |
| 0.023176551 | Proliferation/Metastasis |
| 0.474735294 | Metabolism               |
| 0.198099735 | Metabolism               |

|             |                          |
|-------------|--------------------------|
| 0.007912955 | Metabolism               |
| 0.962275027 | Metabolism               |
| 0.609778399 | Metabolism               |
| 0.698084194 | Metabolism               |
| 0.152180407 | Proliferation/Metastasis |
| 0.102480735 | Metabolism               |
| 0.136659258 | Metabolism               |
| 0.286567571 | Proliferation/Metastasis |
| 0.39414626  | Metabolism               |
| 9.56E-05    | Metabolism               |
| 0.779724174 | Metabolism               |
| 0.006095195 | Metabolism               |
| 0.001015687 | Metabolism               |
| 0.813018261 | Metabolism               |
| 0.670800553 | Metabolism               |
| 0.858746524 | Metabolism               |
| 0.003617295 | TME                      |
| 0.015714302 | TME                      |
| 0.005634615 | TME                      |
| 0.010786238 | TME                      |
| 0.033490479 | TME                      |
| 0.348821527 | Metabolism               |
| 0.60759287  | Metabolism               |
| 0.002526761 | Proliferation/Metastasis |
| 0.088418734 | Metabolism               |
| 1.81E-05    | Proliferation/Metastasis |
| 0.58011509  | Metabolism               |
| 0.01154949  | TME                      |
| 0.132320392 | Metabolism               |
| 0.032178353 | Metabolism               |
| 1.10E-05    | Metabolism               |
| 0.126588157 | Metabolism               |
| 0.01155171  | TME                      |
| 0.277873743 | TME                      |
| 0.15566435  | Proliferation/Metastasis |
| 0.000350035 | Metabolism               |
| 0.033699352 | Proliferation/Metastasis |
| 0.867392425 | Proliferation/Metastasis |
| 0.639968671 | TME                      |
| 0.164980526 | TME                      |
| 0.771774082 | TME                      |
| 0.45760242  | TME                      |
| 0.035934035 | Metabolism               |



|             |                          |
|-------------|--------------------------|
| 0.211267053 | Proliferation/Metastasis |
| 0.013304785 | Metabolism               |
| 0.361502299 | Metabolism               |
| 0.02052422  | Proliferation/Metastasis |
| 0.144729415 | Proliferation/Metastasis |
| 0.013276828 | Metabolism               |
| 0.048608688 | Metabolism               |
| 0.345741557 | Metabolism               |
| 0.004856908 | Metabolism               |
| 0.150867159 | TME                      |
| 0.329897675 | TME                      |
| 0.828353435 | TME                      |
| 0.237287686 | TME                      |
| 0.025921309 | TME                      |
| 0.1853834   | Metabolism               |
| 0.564199608 | Metabolism               |
| 0.972359589 | Metabolism               |
| 0.282026207 | Metabolism               |
| 0.652353548 | Metabolism               |
| 0.90454334  | TME                      |
| 0.560801574 | TME                      |
| 0.719534991 | TME                      |
| 0.486310248 | TME                      |
| 0.223454128 | TME                      |
| 0.600483685 | TME                      |
| 0.628014823 | TME                      |
| 0.794746032 | TME                      |
| 0.773237049 | TME                      |
| 0.090252037 | Proliferation/Metastasis |
| 0.299007723 | Proliferation/Metastasis |
| 0.935802358 | Metabolism               |
| 0.032149593 | Metabolism               |
| 0.941795334 | TME                      |
| 0.925886404 | Metabolism               |
| 0.001418799 | Metabolism               |
| 0.182084319 | TME                      |
| 0.001533752 | Proliferation/Metastasis |
| 0.00167538  | Proliferation/Metastasis |
| 0.482892427 | TME                      |
| 0.013939913 | Metabolism               |
| 0.004391167 | Metabolism               |
| 0.026255003 | Proliferation/Metastasis |
| 0.018859001 | Proliferation/Metastasis |

|             |                          |
|-------------|--------------------------|
| 0.778045128 | TME                      |
| 0.982304143 | TME                      |
| 0.572102318 | TME                      |
| 0.880813841 | TME                      |
| 0.726408798 | Proliferation/Metastasis |
| 0.735363768 | TME                      |
| 0.41042121  | TME                      |
| 0.012959559 | Metabolism               |
| 0.379540204 | TME                      |
| 0.5416174   | TME                      |
| 0.732133585 | TME                      |
| 0.635878077 | TME                      |
| 0.03487096  | Metabolism               |
| 0.908349019 | Metabolism               |
| 0.339575801 | Metabolism               |
| 0.487287432 | TME                      |
| 0.316897724 | Metabolism               |
| 0.582087398 | TME                      |
| 0.035019137 | TME                      |
| 0.56319396  | TME                      |
| 0.767384688 | TME                      |
| 0.060315482 | TME                      |
| 0.118139463 | Metabolism               |
| 0.060263441 | Proliferation/Metastasis |
| 0.0168165   | Metabolism               |
| 0.027055255 | Proliferation/Metastasis |
| 0.013765254 | Metabolism               |
| 0.195349771 | Metabolism               |
| 0.160198044 | Metabolism               |
| 0.015107078 | Metabolism               |
| 0.240978115 | Metabolism               |
| 0.000735911 | Metabolism               |
| 0.489666188 | Metabolism               |
| 0.004250241 | Metabolism               |
| 0.00057682  | Metabolism               |
| 0.443545903 | Metabolism               |
| 0.144869662 | Metabolism               |
| 0.098757684 | Metabolism               |
| 0.9850021   | Metabolism               |
| 0.323860752 | Metabolism               |
| 0.759776607 | TME                      |
| 0.356252854 | Proliferation/Metastasis |
| 0.089313042 | Metabolism               |

|             |                          |
|-------------|--------------------------|
| 0.259319334 | Proliferation/Metastasis |
| 0.699958759 | TME                      |
| 0.137479104 | Proliferation/Metastasis |
| 0.445384684 | Proliferation/Metastasis |
| 0.299405525 | TME                      |
| 0.015664881 | TME                      |
| 0.01660279  | Metabolism               |
| 0.147823994 | Metabolism               |
| 0.137106547 | Proliferation/Metastasis |
| 0.420376209 | Proliferation/Metastasis |
| 0.792394582 | Proliferation/Metastasis |
| 0.035251525 | Metabolism               |
| 0.124603577 | Metabolism               |
| 0.87667987  | Metabolism               |
| 0.078023162 | Proliferation/Metastasis |
| 0.94521055  | TME                      |
| 0.114203913 | TME                      |
| 0.620554152 | Metabolism               |
| 0.664518117 | Proliferation/Metastasis |
| 0.556480775 | Metabolism               |
| 0.405628959 | TME                      |
| 0.851116362 | TME                      |
| 0.819403988 | TME                      |
| 0.990919435 | TME                      |
| 0.001627094 | Metabolism               |
| 0.507162064 | TME                      |
| 0.977041395 | Proliferation/Metastasis |
| 0.629599493 | TME                      |
| 0.09857192  | Proliferation/Metastasis |
| 0.647504437 | Proliferation/Metastasis |
| 0.440960672 | Metabolism               |
| 0.068123821 | Proliferation/Metastasis |
| 0.571823037 | TME                      |
| 0.020644012 | Metabolism               |
| 0.45992629  | TME                      |
| 0.213294758 | TME                      |
| 0.02423984  | TME                      |
| 0.580954473 | TME                      |
| 0.394855725 | TME                      |
| 0.528683486 | TME                      |
| 0.67754255  | Metabolism               |
| 0.356885277 | TME                      |
| 0.166160169 | Metabolism               |

|             |                          |
|-------------|--------------------------|
| 0.053953087 | Metabolism               |
| 0.598422732 | Proliferation/Metastasis |
| 0.320884856 | Proliferation/Metastasis |
| 0.913394779 | Metabolism               |
| 0.210578744 | Metabolism               |
| 0.004054914 | Metabolism               |
| 0.082550995 | Metabolism               |
| 0.018834796 | Proliferation/Metastasis |
| 0.368025025 | Proliferation/Metastasis |
| 0.12253149  | Metabolism               |
| 0.000111168 | Metabolism               |
| 0.01029541  | Metabolism               |
| 0.884817313 | TME                      |
| 0.106905633 | Metabolism               |
| 0.64294743  | Metabolism               |
| 0.124707402 | Metabolism               |
| 0.401470976 | Metabolism               |
| 0.668096491 | Proliferation/Metastasis |
| 2.84E-06    | Metabolism               |
| 0.469619016 | Metabolism               |
| 0.368401066 | Metabolism               |
| 0.00214237  | Metabolism               |
| 4.90E-05    | Metabolism               |
| 0.783356927 | Metabolism               |
| 0.004310072 | Proliferation/Metastasis |
| 0.003410757 | Metabolism               |
| 0.002260694 | Metabolism               |
| 0.936729137 | Proliferation/Metastasis |
| 0.88145734  | Metabolism               |
| 0.847234521 | Metabolism               |
| 0.318955258 | Metabolism               |
| 0.668430486 | Metabolism               |
| 0.660334193 | Metabolism               |
| 0.005861878 | Metabolism               |
| 0.062949181 | Metabolism               |
| 0.517202604 | Metabolism               |
| 0.543991095 | TME                      |
| 0.800575164 | TME                      |
| 0.936169645 | TME                      |
| 0.526891203 | TME                      |
| 0.440377982 | TME                      |
| 0.992585462 | Metabolism               |
| 0.02712577  | Metabolism               |

|             |                          |
|-------------|--------------------------|
| 0.053112764 | Proliferation/Metastasis |
| 0.001491209 | Metabolism               |
| 0.327343859 | Proliferation/Metastasis |
| 0.087852171 | Metabolism               |
| 0.939795159 | TME                      |
| 0.014583918 | Metabolism               |
| 0.378961325 | Metabolism               |
| 0.141923322 | Metabolism               |
| 0.801248651 | Metabolism               |
| 0.013950823 | TME                      |
| 0.052731674 | TME                      |
| 0.026693242 | Proliferation/Metastasis |
| 0.271318244 | Metabolism               |
| 0.173070922 | Proliferation/Metastasis |
| 0.676052967 | Proliferation/Metastasis |

Sheet2: Correlation between PSPGs and cytokines in different cancers

| Gene | Cytokines   | Cancer | Correlation  | p-value     |
|------|-------------|--------|--------------|-------------|
| UPP1 | TGFB1       | ACC    | 0.108385809  | 0.341703959 |
| UPP1 | TGFB2       | ACC    | -0.017533597 | 0.878106676 |
| UPP1 | TGFB3       | ACC    | 0.010303411  | 0.928190744 |
| UPP1 | VEGFA       | ACC    | 0.073839936  | 0.517808982 |
| UPP1 | VEGFB       | ACC    | 0.21353768   | 0.058815548 |
| UPP1 | VEGFC       | ACC    | 0.203579189  | 0.071938732 |
| UPP1 | CCL11       | ACC    | 0.058240123  | 0.610169377 |
| UPP1 | CCL13       | ACC    | 0.136159569  | 0.231499726 |
| UPP1 | CCL14       | ACC    | -0.036103563 | 0.752090806 |
| UPP1 | CCL14-CCL15 | ACC    | 0.15490371   | 0.172847042 |
| UPP1 | CCL15       | ACC    | 0.048552214  | 0.670899494 |
| UPP1 | CCL1        | ACC    | 0.019929456  | 0.861605541 |
| UPP1 | CCL16       | ACC    | 0.021233423  | 0.852649011 |
| UPP1 | CCL17       | ACC    | 0.206601488  | 0.067728626 |
| UPP1 | CCL18       | ACC    | 0.327634693  | 0.003203743 |
| UPP1 | CCL19       | ACC    | 0.002667215  | 0.981387926 |
| UPP1 | CCL20       | ACC    | 0.316673842  | 0.004464007 |
| UPP1 | CCL21       | ACC    | -0.004886082 | 0.965911603 |
| UPP1 | CCL22       | ACC    | 0.151049583  | 0.183914884 |
| UPP1 | CCL23       | ACC    | 0.12606245   | 0.268280338 |
| UPP1 | CCL24       | ACC    | 0.050583559  | 0.657972694 |
| UPP1 | CCL25       | ACC    | 0.083434389  | 0.464756625 |
| UPP1 | CCL26       | ACC    | 0.239071954  | 0.033844222 |
| UPP1 | CCL2        | ACC    | 0.248642531  | 0.027134127 |
| UPP1 | CCL27       | ACC    | -0.015617842 | 0.891338971 |
| UPP1 | CCL28       | ACC    | -0.070873524 | 0.534811376 |
| UPP1 | CCL3        | ACC    | 0.372071585  | 0.000734348 |
| UPP1 | CCL3L1      | ACC    | 0.325383359  | 0.003433014 |
| UPP1 | CCL3L3      | ACC    | 0.273456591  | 0.01474971  |
| UPP1 | CCL4        | ACC    | 0.34036178   | 0.002146511 |
| UPP1 | CCL4L2      | ACC    | 0.333939303  | 0.002632724 |
| UPP1 | CCL5        | ACC    | 0.205612351  | 0.069084059 |
| UPP1 | CCL7        | ACC    | 0.397350519  | 0.00028792  |
| UPP1 | CCL8        | ACC    | 0.362938178  | 0.001011518 |
| UPP1 | CROCCL1     | ACC    | -0.016589437 | 0.884624135 |
| UPP1 | CROCCL2     | ACC    | -0.113718757 | 0.318334904 |
| UPP1 | CXCL10      | ACC    | 0.325585521  | 0.003411844 |
| UPP1 | CXCL11      | ACC    | 0.273128028  | 0.014874503 |
| UPP1 | CXCL12      | ACC    | 0.243600853  | 0.030513222 |
| UPP1 | CXCL1       | ACC    | 0.182775066  | 0.10690549  |
| UPP1 | CXCL13      | ACC    | 0.32644824   | 0.003322805 |

|      |        |     |              |             |
|------|--------|-----|--------------|-------------|
| UPP1 | CXCL14 | ACC | -0.151825244 | 0.181647078 |
| UPP1 | CXCL16 | ACC | 0.208199204  | 0.065584613 |
| UPP1 | CXCL17 | ACC | -0.119577667 | 0.293874136 |
| UPP1 | CXCL2  | ACC | 0.254258216  | 0.023748484 |
| UPP1 | CXCL3  | ACC | 0.225387912  | 0.04581019  |
| UPP1 | CXCL5  | ACC | 0.291971337  | 0.009030729 |
| UPP1 | CXCL6  | ACC | 0.020461668  | 0.857947775 |
| UPP1 | CXCL9  | ACC | 0.266949413  | 0.017396886 |
| UPP1 | IL10   | ACC | 0.350021075  | 0.001566165 |
| UPP1 | IL11   | ACC | 0.063784886  | 0.576526771 |
| UPP1 | IL12A  | ACC | 0.231057467  | 0.040485369 |
| UPP1 | IL12B  | ACC | 0.019160766  | 0.866893682 |
| UPP1 | IL13   | ACC | -0.022942399 | 0.840938928 |
| UPP1 | IL15   | ACC | 0.170901734  | 0.132093173 |
| UPP1 | IL16   | ACC | 0.163555851  | 0.14979287  |
| UPP1 | IL17A  | ACC | -0.118612841 | 0.297814849 |
| UPP1 | IL17B  | ACC | 0.138322539  | 0.224101057 |
| UPP1 | IL17C  | ACC | 0.284504842  | 0.011047995 |
| UPP1 | IL17D  | ACC | -0.038548678 | 0.735896545 |
| UPP1 | IL17F  | ACC | -0.156392797 | 0.168704296 |
| UPP1 | IL18   | ACC | 0.186264991  | 0.100261064 |
| UPP1 | IL19   | ACC | 0.06132694   | 0.591334402 |
| UPP1 | IL1A   | ACC | 0.228155274  | 0.043142991 |
| UPP1 | IL1B   | ACC | 0.259801067  | 0.020765972 |
| UPP1 | IL2    | ACC | -0.144984391 | 0.202359698 |
| UPP1 | IL20   | ACC | 0.0800383    | 0.483188827 |
| UPP1 | IL21   | ACC | NA           | NA          |
| UPP1 | IL22   | ACC | NA           | NA          |
| UPP1 | IL24   | ACC | 0.103223371  | 0.365323958 |
| UPP1 | IL25   | ACC | -0.290394889 | 0.009427506 |
| UPP1 | IL26   | ACC | -0.038106023 | 0.738820019 |
| UPP1 | IL27   | ACC | 0.285912203  | 0.010640208 |
| UPP1 | IL29   | ACC | 0.022667856  | 0.842817874 |
| UPP1 | IL3    | ACC | -0.060199592 | 0.598182816 |
| UPP1 | IL31   | ACC | 0.012973899  | 0.909649013 |
| UPP1 | IL32   | ACC | 0.21201023   | 0.060691514 |
| UPP1 | IL33   | ACC | 0.144001712  | 0.205468292 |
| UPP1 | IL34   | ACC | 0.063139792  | 0.580396442 |
| UPP1 | IL4    | ACC | 0.03601592   | 0.752673314 |
| UPP1 | IL5    | ACC | 0.035110673  | 0.75869795  |
| UPP1 | IL6    | ACC | 0.210902751  | 0.062081852 |
| UPP1 | IL7    | ACC | 0.100363025  | 0.378830908 |
| UPP1 | IL8    | ACC | 0.221578235  | 0.049703382 |

|      |             |      |              |             |
|------|-------------|------|--------------|-------------|
| UPP1 | IL9         | ACC  | NA           | NA          |
| UPP1 | TGFB1       | BLCA | 0.268944081  | 3.43E-08    |
| UPP1 | TGFB2       | BLCA | 0.154148652  | 0.001791503 |
| UPP1 | TGFB3       | BLCA | 0.160934738  | 0.001106148 |
| UPP1 | VEGFA       | BLCA | -0.042158023 | 0.395705829 |
| UPP1 | VEGFB       | BLCA | 0.282214565  | 6.58E-09    |
| UPP1 | VEGFC       | BLCA | 0.382462616  | 1.16E-15    |
| UPP1 | CCL11       | BLCA | 0.272146724  | 2.32E-08    |
| UPP1 | CCL13       | BLCA | 0.354923065  | 1.48E-13    |
| UPP1 | CCL14       | BLCA | 0.101997272  | 0.039465858 |
| UPP1 | CCL14-CCL15 | BLCA | -0.133695661 | 0.006843082 |
| UPP1 | CCL15       | BLCA | -0.151881748 | 0.002095768 |
| UPP1 | CCL1        | BLCA | 0.207722391  | 2.35E-05    |
| UPP1 | CCL16       | BLCA | 0.016730039  | 0.736179463 |
| UPP1 | CCL17       | BLCA | 0.215271146  | 1.15E-05    |
| UPP1 | CCL18       | BLCA | 0.368168906  | 1.52E-14    |
| UPP1 | CCL19       | BLCA | 0.241616283  | 7.86E-07    |
| UPP1 | CCL20       | BLCA | 0.323285965  | 2.22E-11    |
| UPP1 | CCL21       | BLCA | 0.228014916  | 3.27E-06    |
| UPP1 | CCL22       | BLCA | 0.158494498  | 0.001318442 |
| UPP1 | CCL23       | BLCA | 0.281094131  | 7.59E-09    |
| UPP1 | CCL24       | BLCA | 0.160394709  | 0.001150214 |
| UPP1 | CCL25       | BLCA | 0.173477885  | 0.000431455 |
| UPP1 | CCL26       | BLCA | 0.323020191  | 2.31E-11    |
| UPP1 | CCL2        | BLCA | 0.309191935  | 1.73E-10    |
| UPP1 | CCL27       | BLCA | 0.099488441  | 0.044602107 |
| UPP1 | CCL28       | BLCA | 0.033797576  | 0.496012233 |
| UPP1 | CCL3        | BLCA | 0.385688666  | 6.40E-16    |
| UPP1 | CCL3L1      | BLCA | 0.328980974  | 9.40E-12    |
| UPP1 | CCL3L3      | BLCA | 0.051866283  | 0.295959696 |
| UPP1 | CCL4        | BLCA | 0.337798516  | 2.39E-12    |
| UPP1 | CCL4L2      | BLCA | 0.303118031  | 4.06E-10    |
| UPP1 | CCL5        | BLCA | 0.37237897   | 7.24E-15    |
| UPP1 | CCL7        | BLCA | 0.326694822  | 1.33E-11    |
| UPP1 | CCL8        | BLCA | 0.371451323  | 8.54E-15    |
| UPP1 | CROCCL1     | BLCA | -0.238853382 | 1.06E-06    |
| UPP1 | CROCCL2     | BLCA | -0.307560906 | 2.18E-10    |
| UPP1 | CXCL10      | BLCA | 0.287013178  | 3.54E-09    |
| UPP1 | CXCL11      | BLCA | 0.283060736  | 5.90E-09    |
| UPP1 | CXCL12      | BLCA | 0.151377461  | 0.002169574 |
| UPP1 | CXCL1       | BLCA | 0.341838483  | 1.26E-12    |
| UPP1 | CXCL13      | BLCA | 0.212989956  | 1.43E-05    |
| UPP1 | CXCL14      | BLCA | -0.091135122 | 0.065912237 |



|      |        |      |              |             |
|------|--------|------|--------------|-------------|
| UPP1 | CXCL16 | BLCA | 0.180385619  | 0.000249747 |
| UPP1 | CXCL17 | BLCA | -0.000721079 | 0.988414806 |
| UPP1 | CXCL2  | BLCA | 0.36503107   | 2.64E-14    |
| UPP1 | CXCL3  | BLCA | 0.299052736  | 7.11E-10    |
| UPP1 | CXCL5  | BLCA | 0.268051463  | 3.83E-08    |
| UPP1 | CXCL6  | BLCA | 0.160792871  | 0.001117571 |
| UPP1 | CXCL9  | BLCA | 0.256596632  | 1.48E-07    |
| UPP1 | IL10   | BLCA | 0.238740367  | 1.07E-06    |
| UPP1 | IL11   | BLCA | 0.279363184  | 9.45E-09    |
| UPP1 | IL12A  | BLCA | 0.054660528  | 0.270668311 |
| UPP1 | IL12B  | BLCA | 0.127883727  | 0.009714628 |
| UPP1 | IL13   | BLCA | 0.116602961  | 0.01846892  |
| UPP1 | IL15   | BLCA | 0.338585104  | 2.11E-12    |
| UPP1 | IL16   | BLCA | 0.207514349  | 2.39E-05    |
| UPP1 | IL17A  | BLCA | 0.023316012  | 0.638655633 |
| UPP1 | IL17B  | BLCA | 0.217080572  | 9.68E-06    |
| UPP1 | IL17C  | BLCA | 0.084011578  | 0.090124467 |
| UPP1 | IL17D  | BLCA | 0.006555436  | 0.894977581 |
| UPP1 | IL17F  | BLCA | -0.041078659 | 0.407924331 |
| UPP1 | IL18   | BLCA | 0.281633818  | 7.09E-09    |
| UPP1 | IL19   | BLCA | 0.068975981  | 0.164338065 |
| UPP1 | IL1A   | BLCA | 0.365000772  | 2.65E-14    |
| UPP1 | IL1B   | BLCA | 0.355173135  | 1.42E-13    |
| UPP1 | IL2    | BLCA | 0.062053227  | 0.211016996 |
| UPP1 | IL20   | BLCA | 0.141935228  | 0.004069647 |
| UPP1 | IL21   | BLCA | 0.103833883  | 0.036031041 |
| UPP1 | IL22   | BLCA | 0.121523024  | 0.014040588 |
| UPP1 | IL24   | BLCA | 0.327279447  | 1.22E-11    |
| UPP1 | IL25   | BLCA | -0.021151054 | 0.670131711 |
| UPP1 | IL26   | BLCA | 0.147734494  | 0.002777327 |
| UPP1 | IL27   | BLCA | 0.317224268  | 5.45E-11    |
| UPP1 | IL29   | BLCA | 0.286117344  | 3.98E-09    |
| UPP1 | IL3    | BLCA | 0.070490172  | 0.155249414 |
| UPP1 | IL31   | BLCA | 0.020900239  | 0.673817233 |
| UPP1 | IL32   | BLCA | 0.37191348   | 7.87E-15    |
| UPP1 | IL33   | BLCA | 0.084971933  | 0.086494857 |
| UPP1 | IL34   | BLCA | 0.166858337  | 0.000714941 |
| UPP1 | IL4    | BLCA | -0.021517816 | 0.664756703 |
| UPP1 | IL5    | BLCA | 0.020721755  | 0.676444669 |
| UPP1 | IL6    | BLCA | 0.349065748  | 3.91E-13    |
| UPP1 | IL7    | BLCA | 0.056335992  | 0.256232109 |
| UPP1 | IL8    | BLCA | 0.307714567  | 2.14E-10    |
| UPP1 | IL9    | BLCA | -0.055483184 | 0.263512131 |

|      |             |      |              |             |
|------|-------------|------|--------------|-------------|
| UPP1 | TGFB1       | DLBC | 0.243510645  | 0.095349299 |
| UPP1 | TGFB2       | DLBC | 0.24479745   | 0.093557712 |
| UPP1 | TGFB3       | DLBC | 0.385959072  | 0.006740921 |
| UPP1 | VEGFA       | DLBC | -0.10586294  | 0.47391553  |
| UPP1 | VEGFB       | DLBC | 0.575071914  | 1.91E-05    |
| UPP1 | VEGFC       | DLBC | 0.024721674  | 0.867537354 |
| UPP1 | CCL11       | DLBC | 0.3493068    | 0.014954694 |
| UPP1 | CCL13       | DLBC | 0.012813205  | 0.931119866 |
| UPP1 | CCL14       | DLBC | -0.028478727 | 0.847629135 |
| UPP1 | CCL14-CCL15 | DLBC | 0.128678634  | 0.383402914 |
| UPP1 | CCL15       | DLBC | 0.295471907  | 0.041459938 |
| UPP1 | CCL1        | DLBC | 0.095985357  | 0.516352765 |
| UPP1 | CCL16       | DLBC | -0.206121619 | 0.159856485 |
| UPP1 | CCL17       | DLBC | 0.18523653   | 0.207500182 |
| UPP1 | CCL18       | DLBC | 0.056202487  | 0.7043772   |
| UPP1 | CCL19       | DLBC | 0.045047966  | 0.761105849 |
| UPP1 | CCL20       | DLBC | 0.187275903  | 0.202452252 |
| UPP1 | CCL21       | DLBC | -0.028296645 | 0.848591906 |
| UPP1 | CCL22       | DLBC | 0.113250201  | 0.44343321  |
| UPP1 | CCL23       | DLBC | 0.24774425   | 0.089553357 |
| UPP1 | CCL24       | DLBC | -0.068292903 | 0.644644933 |
| UPP1 | CCL25       | DLBC | 0.237793028  | 0.103632853 |
| UPP1 | CCL26       | DLBC | 0.02054987   | 0.889738345 |
| UPP1 | CCL2        | DLBC | 0.175180575  | 0.233681009 |
| UPP1 | CCL27       | DLBC | 0.061491543  | 0.67800334  |
| UPP1 | CCL28       | DLBC | -0.14388782  | 0.329215153 |
| UPP1 | CCL3        | DLBC | 0.336842276  | 0.019228709 |
| UPP1 | CCL3L1      | DLBC | 0.583406373  | 1.35E-05    |
| UPP1 | CCL3L3      | DLBC | -0.306028058 | 0.034397524 |
| UPP1 | CCL4        | DLBC | 0.0202408    | 0.891386664 |
| UPP1 | CCL4L2      | DLBC | 0.176156095  | 0.231046468 |
| UPP1 | CCL5        | DLBC | 0.416154592  | 0.003261759 |
| UPP1 | CCL7        | DLBC | 0.204096617  | 0.164090309 |
| UPP1 | CCL8        | DLBC | 0.025648185  | 0.862619827 |
| UPP1 | CROCCL1     | DLBC | -0.103802263 | 0.482612803 |
| UPP1 | CROCCL2     | DLBC | -0.381307307 | 0.007495366 |
| UPP1 | CXCL10      | DLBC | -0.004367384 | 0.976497206 |
| UPP1 | CXCL11      | DLBC | -0.027902534 | 0.850676542 |
| UPP1 | CXCL12      | DLBC | -0.12827809  | 0.384897702 |
| UPP1 | CXCL1       | DLBC | 0.474998941  | 0.000646295 |
| UPP1 | CXCL13      | DLBC | 0.09803454   | 0.507395089 |
| UPP1 | CXCL14      | DLBC | 0.096554684  | 0.513856116 |
| UPP1 | CXCL16      | DLBC | 0.239517004  | 0.101079007 |

|      |        |      |              |             |
|------|--------|------|--------------|-------------|
| UPP1 | CXCL17 | DLBC | 0.321798819  | 0.025719833 |
| UPP1 | CXCL2  | DLBC | 0.213216878  | 0.145651932 |
| UPP1 | CXCL3  | DLBC | 0.234318581  | 0.108930138 |
| UPP1 | CXCL5  | DLBC | 0.237365746  | 0.104273419 |
| UPP1 | CXCL6  | DLBC | 0.313972875  | 0.029764327 |
| UPP1 | CXCL9  | DLBC | -0.300286095 | 0.038104415 |
| UPP1 | IL10   | DLBC | -0.161190178 | 0.273737004 |
| UPP1 | IL11   | DLBC | 0.334865282  | 0.019993385 |
| UPP1 | IL12A  | DLBC | -0.042983806 | 0.771751456 |
| UPP1 | IL12B  | DLBC | 0.240960635  | 0.098977982 |
| UPP1 | IL13   | DLBC | 0.135162236  | 0.359687753 |
| UPP1 | IL15   | DLBC | 0.097148045  | 0.511260551 |
| UPP1 | IL16   | DLBC | -0.118691275 | 0.42169313  |
| UPP1 | IL17A  | DLBC | 0.099102325  | 0.502758918 |
| UPP1 | IL17B  | DLBC | 0.297874852  | 0.039756029 |
| UPP1 | IL17C  | DLBC | 0.282896507  | 0.051378635 |
| UPP1 | IL17D  | DLBC | -0.301353724 | 0.037391366 |
| UPP1 | IL17F  | DLBC | -0.119732674 | 0.417602237 |
| UPP1 | IL18   | DLBC | 0.428329028  | 0.00238798  |
| UPP1 | IL19   | DLBC | -0.081492751 | 0.58188535  |
| UPP1 | IL1A   | DLBC | 0.251394121  | 0.084780066 |
| UPP1 | IL1B   | DLBC | 0.050830988  | 0.731518482 |
| UPP1 | IL2    | DLBC | -0.185790922 | 0.206119277 |
| UPP1 | IL20   | DLBC | 0.164056779  | 0.265181528 |
| UPP1 | IL21   | DLBC | -0.225638351 | 0.123067996 |
| UPP1 | IL22   | DLBC | -0.060746891 | 0.681694425 |
| UPP1 | IL24   | DLBC | -0.032532883 | 0.826251917 |
| UPP1 | IL25   | DLBC | 0.03095931   | 0.834535339 |
| UPP1 | IL26   | DLBC | -0.172742081 | 0.240356356 |
| UPP1 | IL27   | DLBC | -0.038026125 | 0.797486844 |
| UPP1 | IL29   | DLBC | 0.000701933  | 0.99622208  |
| UPP1 | IL3    | DLBC | -0.014736487 | 0.920811595 |
| UPP1 | IL31   | DLBC | 0.080600144  | 0.586041135 |
| UPP1 | IL32   | DLBC | 0.346196658  | 0.015937082 |
| UPP1 | IL33   | DLBC | -0.485982639 | 0.000462162 |
| UPP1 | IL34   | DLBC | 0.460980692  | 0.00097587  |
| UPP1 | IL4    | DLBC | 0.073257763  | 0.620718925 |
| UPP1 | IL5    | DLBC | -0.197818137 | 0.177735651 |
| UPP1 | IL6    | DLBC | 0.067541858  | 0.64829625  |
| UPP1 | IL7    | DLBC | -0.375375946 | 0.0085627   |
| UPP1 | IL8    | DLBC | 0.517167853  | 0.000167337 |
| UPP1 | IL9    | DLBC | 0.042465461  | 0.774431368 |
| UPP1 | TGFB1  | UCEC | 0.32133651   | 2.88E-14    |

|      |             |      |              |             |
|------|-------------|------|--------------|-------------|
| UPP1 | TGFB2       | UCEC | -0.049554068 | 0.253428959 |
| UPP1 | TGFB3       | UCEC | -0.036545846 | 0.399772944 |
| UPP1 | VEGFA       | UCEC | 0.091163746  | 0.035367952 |
| UPP1 | VEGFB       | UCEC | 0.320874619  | 3.14E-14    |
| UPP1 | VEGFC       | UCEC | -0.060533444 | 0.162858483 |
| UPP1 | CCL11       | UCEC | 0.209832536  | 1.02E-06    |
| UPP1 | CCL13       | UCEC | 0.159390352  | 0.000220043 |
| UPP1 | CCL14       | UCEC | 0.017721606  | 0.683122041 |
| UPP1 | CCL14-CCL15 | UCEC | -0.11335666  | 0.008809877 |
| UPP1 | CCL15       | UCEC | -0.190449243 | 9.55E-06    |
| UPP1 | CCL1        | UCEC | -0.059986927 | 0.166695555 |
| UPP1 | CCL16       | UCEC | -0.009520295 | 0.826430359 |
| UPP1 | CCL17       | UCEC | 0.214581684  | 5.71E-07    |
| UPP1 | CCL18       | UCEC | 0.146621852  | 0.000685162 |
| UPP1 | CCL19       | UCEC | 0.079421875  | 0.066923623 |
| UPP1 | CCL20       | UCEC | 0.167592127  | 0.000101236 |
| UPP1 | CCL21       | UCEC | -0.028836674 | 0.506484581 |
| UPP1 | CCL22       | UCEC | 0.283408703  | 2.65E-11    |
| UPP1 | CCL23       | UCEC | 0.133957644  | 0.001939317 |
| UPP1 | CCL24       | UCEC | 0.075433059  | 0.081876868 |
| UPP1 | CCL25       | UCEC | 0.085873388  | 0.047529833 |
| UPP1 | CCL26       | UCEC | 0.258195172  | 1.45E-09    |
| UPP1 | CCL2        | UCEC | 0.125046356  | 0.003834093 |
| UPP1 | CCL27       | UCEC | -0.134027568 | 0.001928656 |
| UPP1 | CCL28       | UCEC | 0.015481266  | 0.721395002 |
| UPP1 | CCL3        | UCEC | 0.385496202  | 2.50E-20    |
| UPP1 | CCL3L1      | UCEC | 0.304348791  | 6.92E-13    |
| UPP1 | CCL3L3      | UCEC | 0.090655945  | 0.036407101 |
| UPP1 | CCL4        | UCEC | 0.295844455  | 3.15E-12    |
| UPP1 | CCL4L2      | UCEC | 0.299138482  | 1.76E-12    |
| UPP1 | CCL5        | UCEC | 0.289367294  | 9.68E-12    |
| UPP1 | CCL7        | UCEC | 0.17372139   | 5.53E-05    |
| UPP1 | CCL8        | UCEC | 0.185858422  | 1.57E-05    |
| UPP1 | CROCCL1     | UCEC | -0.127556032 | 0.00317769  |
| UPP1 | CROCCL2     | UCEC | -0.180211924 | 2.85E-05    |
| UPP1 | CXCL10      | UCEC | 0.104223372  | 0.016080079 |
| UPP1 | CXCL11      | UCEC | 0.131227751  | 0.002400159 |
| UPP1 | CXCL12      | UCEC | -0.014714984 | 0.73465301  |
| UPP1 | CXCL1       | UCEC | 0.173007183  | 5.94E-05    |
| UPP1 | CXCL13      | UCEC | 0.171984668  | 6.58E-05    |
| UPP1 | CXCL14      | UCEC | -0.03797009  | 0.381647332 |
| UPP1 | CXCL16      | UCEC | 0.376031163  | 2.40E-19    |
| UPP1 | CXCL17      | UCEC | -0.065189575 | 0.132817398 |

|      |       |      |              |             |
|------|-------|------|--------------|-------------|
| UPP1 | CXCL2 | UCEC | 0.110939683  | 0.010372884 |
| UPP1 | CXCL3 | UCEC | 0.133384682  | 0.002028723 |
| UPP1 | CXCL5 | UCEC | -0.038298651 | 0.377538409 |
| UPP1 | CXCL6 | UCEC | 0.113361405  | 0.008807027 |
| UPP1 | CXCL9 | UCEC | 0.109666345  | 0.011291502 |
| UPP1 | IL10  | UCEC | 0.101831868  | 0.018694496 |
| UPP1 | IL11  | UCEC | 0.230645619  | 7.24E-08    |
| UPP1 | IL12A | UCEC | -0.051717526 | 0.233266572 |
| UPP1 | IL12B | UCEC | 0.119769552  | 0.0056302   |
| UPP1 | IL13  | UCEC | -0.042924916 | 0.322600531 |
| UPP1 | IL15  | UCEC | 0.228920847  | 9.10E-08    |
| UPP1 | IL16  | UCEC | 0.120504198  | 0.005341532 |
| UPP1 | IL17A | UCEC | -0.137437715 | 0.001469437 |
| UPP1 | IL17B | UCEC | 0.079137966  | 0.067908057 |
| UPP1 | IL17C | UCEC | 0.170770136  | 7.42E-05    |
| UPP1 | IL17D | UCEC | -0.158884093 | 0.000230566 |
| UPP1 | IL17F | UCEC | -0.02382233  | 0.583164762 |
| UPP1 | IL18  | UCEC | 0.319113466  | 4.41E-14    |
| UPP1 | IL19  | UCEC | 0.101759007  | 0.018779657 |
| UPP1 | IL1A  | UCEC | 0.300677833  | 1.34E-12    |
| UPP1 | IL1B  | UCEC | 0.311402579  | 1.89E-13    |
| UPP1 | IL2   | UCEC | -0.232353269 | 5.76E-08    |
| UPP1 | IL20  | UCEC | 0.120512518  | 0.005338341 |
| UPP1 | IL21  | UCEC | -0.138974153 | 0.001297389 |
| UPP1 | IL22  | UCEC | -0.141583399 | 0.001047094 |
| UPP1 | IL24  | UCEC | 0.17467341   | 5.03E-05    |
| UPP1 | IL25  | UCEC | -0.132777355 | 0.002127595 |
| UPP1 | IL26  | UCEC | -0.178565937 | 3.38E-05    |
| UPP1 | IL27  | UCEC | 0.237503785  | 2.86E-08    |
| UPP1 | IL29  | UCEC | 0.092448279  | 0.032851382 |
| UPP1 | IL3   | UCEC | -0.142531511 | 0.000967773 |
| UPP1 | IL31  | UCEC | -0.142946123 | 0.000934861 |
| UPP1 | IL32  | UCEC | 0.301229794  | 1.21E-12    |
| UPP1 | IL33  | UCEC | -0.144266691 | 0.000836802 |
| UPP1 | IL34  | UCEC | 0.173002878  | 5.94E-05    |
| UPP1 | IL4   | UCEC | -0.142696975 | 0.000954512 |
| UPP1 | IL5   | UCEC | 0.014852747  | 0.732263506 |
| UPP1 | IL6   | UCEC | 0.335619999  | 1.69E-15    |
| UPP1 | IL7   | UCEC | -0.138755144 | 0.001320724 |
| UPP1 | IL8   | UCEC | 0.213461371  | 6.56E-07    |
| UPP1 | IL9   | UCEC | -0.140591154 | 0.001136497 |
| UPP1 | TGFB1 | SKCM | 0.060706712  | 0.540423988 |
| UPP1 | TGFB2 | SKCM | -0.417843476 | 1.02E-05    |

|      |             |      |              |             |
|------|-------------|------|--------------|-------------|
| UPP1 | TGFB3       | SKCM | -0.097696823 | 0.323820628 |
| UPP1 | VEGFA       | SKCM | -0.113984688 | 0.249267449 |
| UPP1 | VEGFB       | SKCM | 0.163828372  | 0.096556218 |
| UPP1 | VEGFC       | SKCM | 0.019180116  | 0.846760615 |
| UPP1 | CCL11       | SKCM | 0.15075635   | 0.126616282 |
| UPP1 | CCL13       | SKCM | 0.03746444   | 0.705743579 |
| UPP1 | CCL14       | SKCM | 0.056084359  | 0.571745187 |
| UPP1 | CCL14-CCL15 | SKCM | -0.063772062 | 0.520130129 |
| UPP1 | CCL15       | SKCM | -0.069335166 | 0.48431515  |
| UPP1 | CCL1        | SKCM | 0.130966565  | 0.185112984 |
| UPP1 | CCL16       | SKCM | -0.278774771 | 0.004161738 |
| UPP1 | CCL17       | SKCM | -0.007269993 | 0.941611505 |
| UPP1 | CCL18       | SKCM | 0.276885726  | 0.004435322 |
| UPP1 | CCL19       | SKCM | -0.05139269  | 0.604379566 |
| UPP1 | CCL20       | SKCM | 0.260576649  | 0.00754966  |
| UPP1 | CCL21       | SKCM | -0.075191783 | 0.448082454 |
| UPP1 | CCL22       | SKCM | 0.124248407  | 0.208879834 |
| UPP1 | CCL23       | SKCM | 0.042601645  | 0.66763406  |
| UPP1 | CCL24       | SKCM | -0.106783512 | 0.280628275 |
| UPP1 | CCL25       | SKCM | -0.201704977 | 0.040044575 |
| UPP1 | CCL26       | SKCM | 0.214156019  | 0.029038127 |
| UPP1 | CCL2        | SKCM | -0.115736708 | 0.242017617 |
| UPP1 | CCL27       | SKCM | -0.225663106 | 0.021261855 |
| UPP1 | CCL28       | SKCM | -0.17400239  | 0.077305544 |
| UPP1 | CCL3        | SKCM | 0.233848038  | 0.016885328 |
| UPP1 | CCL3L1      | SKCM | 0.127126685  | 0.198443608 |
| UPP1 | CCL3L3      | SKCM | -0.05188933  | 0.600886308 |
| UPP1 | CCL4        | SKCM | 0.06771602   | 0.49460128  |
| UPP1 | CCL4L2      | SKCM | 0.081445132  | 0.411128859 |
| UPP1 | CCL5        | SKCM | 0.114482648  | 0.247191853 |
| UPP1 | CCL7        | SKCM | 0.070808613  | 0.475054853 |
| UPP1 | CCL8        | SKCM | -0.013151376 | 0.894586468 |
| UPP1 | CROCCL1     | SKCM | -0.421230875 | 8.47E-06    |
| UPP1 | CROCCL2     | SKCM | -0.482918685 | 2.08E-07    |
| UPP1 | CXCL10      | SKCM | -0.159380536 | 0.106078607 |
| UPP1 | CXCL11      | SKCM | -0.139219824 | 0.15869218  |
| UPP1 | CXCL12      | SKCM | -0.071187844 | 0.472687058 |
| UPP1 | CXCL1       | SKCM | 0.299847435  | 0.001985586 |
| UPP1 | CXCL13      | SKCM | 0.044387912  | 0.654572397 |
| UPP1 | CXCL14      | SKCM | -0.11880742  | 0.229666343 |
| UPP1 | CXCL16      | SKCM | -0.028602688 | 0.773174622 |
| UPP1 | CXCL17      | SKCM | 0.122678781  | 0.214733423 |
| UPP1 | CXCL2       | SKCM | 0.045562375  | 0.646040512 |

|      |       |      |              |             |
|------|-------|------|--------------|-------------|
| UPP1 | CXCL3 | SKCM | 0.267163421  | 0.006113416 |
| UPP1 | CXCL5 | SKCM | 0.102876234  | 0.298704259 |
| UPP1 | CXCL6 | SKCM | 0.035475911  | 0.720699044 |
| UPP1 | CXCL9 | SKCM | -0.095885892 | 0.332913107 |
| UPP1 | IL10  | SKCM | -0.072303858 | 0.465756316 |
| UPP1 | IL11  | SKCM | 0.168005159  | 0.088240063 |
| UPP1 | IL12A | SKCM | -0.067508587 | 0.495927325 |
| UPP1 | IL12B | SKCM | -0.04615253  | 0.6417705   |
| UPP1 | IL13  | SKCM | -0.131179815 | 0.184392273 |
| UPP1 | IL15  | SKCM | -0.284694961 | 0.003399354 |
| UPP1 | IL16  | SKCM | 0.102839171  | 0.298879306 |
| UPP1 | IL17A | SKCM | 0.071153137  | 0.472903495 |
| UPP1 | IL17B | SKCM | 0.144383397  | 0.143657539 |
| UPP1 | IL17C | SKCM | 0.038781222  | 0.695901092 |
| UPP1 | IL17D | SKCM | -0.381612404 | 6.41E-05    |
| UPP1 | IL17F | SKCM | 0.111619575  | 0.259289399 |
| UPP1 | IL18  | SKCM | -0.126208971 | 0.201729485 |
| UPP1 | IL19  | SKCM | -0.01619934  | 0.870348731 |
| UPP1 | IL1A  | SKCM | 0.067524164  | 0.495827683 |
| UPP1 | IL1B  | SKCM | 0.15808096   | 0.108995091 |
| UPP1 | IL2   | SKCM | -0.180819656 | 0.066225927 |
| UPP1 | IL20  | SKCM | -0.036565071 | 0.71249415  |
| UPP1 | IL21  | SKCM | -0.210711228 | 0.031790309 |
| UPP1 | IL22  | SKCM | 0.065559177  | 0.508479982 |
| UPP1 | IL24  | SKCM | 0.28673548   | 0.003167193 |
| UPP1 | IL25  | SKCM | -0.239657024 | 0.014273186 |
| UPP1 | IL26  | SKCM | -0.155220871 | 0.115633464 |
| UPP1 | IL27  | SKCM | -0.068163926 | 0.491744351 |
| UPP1 | IL29  | SKCM | -0.030503088 | 0.758551459 |
| UPP1 | IL3   | SKCM | 0.020877978  | 0.833383574 |
| UPP1 | IL31  | SKCM | 0.003117649  | 0.974942796 |
| UPP1 | IL32  | SKCM | 0.144832958  | 0.142401329 |
| UPP1 | IL33  | SKCM | -0.304672119 | 0.001663016 |
| UPP1 | IL34  | SKCM | -0.079823529 | 0.420536279 |
| UPP1 | IL4   | SKCM | -0.060743256 | 0.540179773 |
| UPP1 | IL5   | SKCM | -0.093268149 | 0.346340547 |
| UPP1 | IL6   | SKCM | 0.182990225  | 0.062981889 |
| UPP1 | IL7   | SKCM | -0.245528318 | 0.01199723  |
| UPP1 | IL8   | SKCM | 0.209238597  | 0.03303238  |
| UPP1 | IL9   | SKCM | -0.22928948  | 0.019215392 |
| UPP1 | TGFB1 | HNSC | 0.372744804  | 1.39E-18    |
| UPP1 | TGFB2 | HNSC | -0.085394331 | 0.051635491 |
| UPP1 | TGFB3 | HNSC | -0.152563343 | 0.0004811   |

|      |             |      |              |             |
|------|-------------|------|--------------|-------------|
| UPP1 | VEGFA       | HNSC | 0.081526173  | 0.063211317 |
| UPP1 | VEGFB       | HNSC | 0.107172928  | 0.014481867 |
| UPP1 | VEGFC       | HNSC | 0.335913029  | 3.51E-15    |
| UPP1 | CCL11       | HNSC | 0.067199762  | 0.12590959  |
| UPP1 | CCL13       | HNSC | 0.060228249  | 0.170264196 |
| UPP1 | CCL14       | HNSC | -0.199683914 | 4.46E-06    |
| UPP1 | CCL14-CCL15 | HNSC | -0.154355152 | 0.000411555 |
| UPP1 | CCL15       | HNSC | -0.147543106 | 0.000738447 |
| UPP1 | CCL1        | HNSC | -0.027792212 | 0.527153658 |
| UPP1 | CCL16       | HNSC | -0.14556701  | 0.00087096  |
| UPP1 | CCL17       | HNSC | -0.05083585  | 0.247192969 |
| UPP1 | CCL18       | HNSC | -0.137322885 | 0.001696471 |
| UPP1 | CCL19       | HNSC | -0.316093761 | 1.57E-13    |
| UPP1 | CCL20       | HNSC | 0.066095384  | 0.132266025 |
| UPP1 | CCL21       | HNSC | -0.060318115 | 0.169626381 |
| UPP1 | CCL22       | HNSC | -0.059238813 | 0.177405507 |
| UPP1 | CCL23       | HNSC | -0.030556584 | 0.486878067 |
| UPP1 | CCL24       | HNSC | 0.085406117  | 0.051603125 |
| UPP1 | CCL25       | HNSC | -0.280136889 | 7.85E-11    |
| UPP1 | CCL26       | HNSC | 0.089962844  | 0.040297016 |
| UPP1 | CCL2        | HNSC | -0.149601785 | 0.000620447 |
| UPP1 | CCL27       | HNSC | 0.238260304  | 3.81E-08    |
| UPP1 | CCL28       | HNSC | -0.16060118  | 0.000235666 |
| UPP1 | CCL3        | HNSC | 0.157501198  | 0.000311595 |
| UPP1 | CCL3L1      | HNSC | 0.12203567   | 0.005326969 |
| UPP1 | CCL3L3      | HNSC | -0.04499351  | 0.305807191 |
| UPP1 | CCL4        | HNSC | -0.046644254 | 0.28838512  |
| UPP1 | CCL4L2      | HNSC | -0.074011927 | 0.091799074 |
| UPP1 | CCL5        | HNSC | -0.002788492 | 0.949420507 |
| UPP1 | CCL7        | HNSC | 0.101787641  | 0.020256529 |
| UPP1 | CCL8        | HNSC | 0.007687672  | 0.861168734 |
| UPP1 | CROCCL1     | HNSC | -0.250667253 | 6.83E-09    |
| UPP1 | CROCCL2     | HNSC | -0.428783329 | 1.14E-24    |
| UPP1 | CXCL10      | HNSC | -0.034133409 | 0.437327109 |
| UPP1 | CXCL11      | HNSC | 0.071077356  | 0.105455721 |
| UPP1 | CXCL12      | HNSC | -0.298602263 | 3.60E-12    |
| UPP1 | CXCL1       | HNSC | 0.317783372  | 1.15E-13    |
| UPP1 | CXCL13      | HNSC | -0.206110499 | 2.14E-06    |
| UPP1 | CXCL14      | HNSC | 0.269219246  | 4.38E-10    |
| UPP1 | CXCL16      | HNSC | -0.174844922 | 6.11E-05    |
| UPP1 | CXCL17      | HNSC | -0.113456486 | 0.009615859 |
| UPP1 | CXCL2       | HNSC | 0.228067835  | 1.46E-07    |
| UPP1 | CXCL3       | HNSC | 0.197983655  | 5.39E-06    |



|      |       |      |              |             |
|------|-------|------|--------------|-------------|
| UPP1 | CXCL5 | HNSC | 0.200214872  | 4.20E-06    |
| UPP1 | CXCL6 | HNSC | 0.138055757  | 0.001601119 |
| UPP1 | CXCL9 | HNSC | -0.160096755 | 0.000246709 |
| UPP1 | IL10  | HNSC | -0.052009557 | 0.236433782 |
| UPP1 | IL11  | HNSC | 0.312107607  | 3.27E-13    |
| UPP1 | IL12A | HNSC | -0.341565853 | 1.13E-15    |
| UPP1 | IL12B | HNSC | -0.215927551 | 6.67E-07    |
| UPP1 | IL13  | HNSC | -0.080722168 | 0.065867936 |
| UPP1 | IL15  | HNSC | -0.139703976 | 0.001404378 |
| UPP1 | IL16  | HNSC | -0.362650781 | 1.32E-17    |
| UPP1 | IL17A | HNSC | -0.141083206 | 0.0012571   |
| UPP1 | IL17B | HNSC | 0.092605666  | 0.034755935 |
| UPP1 | IL17C | HNSC | 0.17869546   | 4.17E-05    |
| UPP1 | IL17D | HNSC | -0.299260689 | 3.21E-12    |
| UPP1 | IL17F | HNSC | -0.062801869 | 0.152697359 |
| UPP1 | IL18  | HNSC | 0.520919564  | 1.65E-37    |
| UPP1 | IL19  | HNSC | 0.045230251  | 0.303266748 |
| UPP1 | IL1A  | HNSC | 0.601785067  | 1.54E-52    |
| UPP1 | IL1B  | HNSC | 0.465576094  | 2.47E-29    |
| UPP1 | IL2   | HNSC | -0.259126998 | 2.00E-09    |
| UPP1 | IL20  | HNSC | 0.410504812  | 1.48E-22    |
| UPP1 | IL21  | HNSC | -0.271956131 | 2.87E-10    |
| UPP1 | IL22  | HNSC | 0.048923322  | 0.265448447 |
| UPP1 | IL24  | HNSC | 0.494198065  | 2.24E-33    |
| UPP1 | IL25  | HNSC | -0.049489309 | 0.259952071 |
| UPP1 | IL26  | HNSC | -0.181953493 | 2.99E-05    |
| UPP1 | IL27  | HNSC | -0.116868997 | 0.007635945 |
| UPP1 | IL29  | HNSC | 0.114216714  | 0.009139015 |
| UPP1 | IL3   | HNSC | 0.020338211  | 0.643569149 |
| UPP1 | IL31  | HNSC | -0.048528075 | 0.269333744 |
| UPP1 | IL32  | HNSC | 0.013505197  | 0.758661647 |
| UPP1 | IL33  | HNSC | -0.086765248 | 0.047982739 |
| UPP1 | IL34  | HNSC | -0.347071626 | 3.64E-16    |
| UPP1 | IL4   | HNSC | -0.055894352 | 0.203190204 |
| UPP1 | IL5   | HNSC | -0.010901717 | 0.804129369 |
| UPP1 | IL6   | HNSC | 0.159848876  | 0.000252311 |
| UPP1 | IL7   | HNSC | -0.191016987 | 1.16E-05    |
| UPP1 | IL8   | HNSC | 0.342339744  | 9.61E-16    |
| UPP1 | IL9   | HNSC | -0.066048253 | 0.13254271  |
| UPP1 | TGFB1 | PRAD | 0.675401215  | 1.78E-67    |
| UPP1 | TGFB2 | PRAD | 0.188237597  | 2.40E-05    |
| UPP1 | TGFB3 | PRAD | 0.330957678  | 3.62E-14    |
| UPP1 | VEGFA | PRAD | 0.144470148  | 0.001239664 |

|      |             |      |             |             |
|------|-------------|------|-------------|-------------|
| UPP1 | VEGFB       | PRAD | 0.355588743 | 2.93E-16    |
| UPP1 | VEGFC       | PRAD | 0.399516862 | 1.81E-20    |
| UPP1 | CCL11       | PRAD | 0.420693984 | 9.77E-23    |
| UPP1 | CCL13       | PRAD | 0.388924734 | 2.14E-19    |
| UPP1 | CCL14       | PRAD | 0.52388811  | 2.22E-36    |
| UPP1 | CCL14-CCL15 | PRAD | 0.19578149  | 1.10E-05    |
| UPP1 | CCL15       | PRAD | 0.249574948 | 1.71E-08    |
| UPP1 | CCL1        | PRAD | 0.151973883 | 0.000675678 |
| UPP1 | CCL16       | PRAD | 0.358100833 | 1.75E-16    |
| UPP1 | CCL17       | PRAD | 0.419236625 | 1.42E-22    |
| UPP1 | CCL18       | PRAD | 0.135299002 | 0.002506111 |
| UPP1 | CCL19       | PRAD | 0.420130529 | 1.13E-22    |
| UPP1 | CCL20       | PRAD | 0.18823829  | 2.40E-05    |
| UPP1 | CCL21       | PRAD | 0.46082879  | 1.69E-27    |
| UPP1 | CCL22       | PRAD | 0.38175988  | 1.09E-18    |
| UPP1 | CCL23       | PRAD | 0.439028596 | 7.82E-25    |
| UPP1 | CCL24       | PRAD | 0.112105345 | 0.012390798 |
| UPP1 | CCL25       | PRAD | 0.125417495 | 0.00510998  |
| UPP1 | CCL26       | PRAD | 0.339620993 | 6.98E-15    |
| UPP1 | CCL2        | PRAD | 0.539726948 | 6.44E-39    |
| UPP1 | CCL27       | PRAD | 0.225680965 | 3.69E-07    |
| UPP1 | CCL28       | PRAD | 0.129620475 | 0.003795959 |
| UPP1 | CCL3        | PRAD | 0.332449192 | 2.73E-14    |
| UPP1 | CCL3L1      | PRAD | 0.240844484 | 5.45E-08    |
| UPP1 | CCL3L3      | PRAD | 0.189430868 | 2.13E-05    |
| UPP1 | CCL4        | PRAD | 0.455143264 | 8.75E-27    |
| UPP1 | CCL4L2      | PRAD | 0.337097973 | 1.13E-14    |
| UPP1 | CCL5        | PRAD | 0.453688414 | 1.33E-26    |
| UPP1 | CCL7        | PRAD | 0.444910078 | 1.56E-25    |
| UPP1 | CCL8        | PRAD | 0.347097192 | 1.62E-15    |
| UPP1 | CROCCL1     | PRAD | 0.142431043 | 0.001454882 |
| UPP1 | CROCCL2     | PRAD | 0.12956153  | 0.003812042 |
| UPP1 | CXCL10      | PRAD | 0.096573881 | 0.031351551 |
| UPP1 | CXCL11      | PRAD | 0.056163821 | 0.211328057 |
| UPP1 | CXCL12      | PRAD | 0.29633618  | 1.56E-11    |
| UPP1 | CXCL1       | PRAD | 0.324276078 | 1.24E-13    |
| UPP1 | CXCL13      | PRAD | 0.173139589 | 0.000104669 |
| UPP1 | CXCL14      | PRAD | 0.29158739  | 3.39E-11    |
| UPP1 | CXCL16      | PRAD | 0.411127371 | 1.08E-21    |
| UPP1 | CXCL17      | PRAD | 0.334628868 | 1.81E-14    |
| UPP1 | CXCL2       | PRAD | 0.329239862 | 4.98E-14    |
| UPP1 | CXCL3       | PRAD | 0.22669226  | 3.26E-07    |
| UPP1 | CXCL5       | PRAD | 0.132995303 | 0.002971495 |

|      |       |      |              |             |
|------|-------|------|--------------|-------------|
| UPP1 | CXCL6 | PRAD | 0.264595814  | 2.09E-09    |
| UPP1 | CXCL9 | PRAD | 0.135729099  | 0.002426973 |
| UPP1 | IL10  | PRAD | 0.289895298  | 4.44E-11    |
| UPP1 | IL11  | PRAD | 0.489976804  | 2.25E-31    |
| UPP1 | IL12A | PRAD | 0.372050906  | 9.20E-18    |
| UPP1 | IL12B | PRAD | 0.224347634  | 4.34E-07    |
| UPP1 | IL13  | PRAD | 0.373260081  | 7.08E-18    |
| UPP1 | IL15  | PRAD | 0.440010727  | 5.99E-25    |
| UPP1 | IL16  | PRAD | 0.36456381   | 4.55E-17    |
| UPP1 | IL17A | PRAD | 0.089253501  | 0.046730688 |
| UPP1 | IL17B | PRAD | 0.549506133  | 1.49E-40    |
| UPP1 | IL17C | PRAD | 0.099385897  | 0.026721102 |
| UPP1 | IL17D | PRAD | 0.194623252  | 1.24E-05    |
| UPP1 | IL17F | PRAD | 0.072793937  | 0.105039932 |
| UPP1 | IL18  | PRAD | 0.552802675  | 4.07E-41    |
| UPP1 | IL19  | PRAD | 0.133496831  | 0.002863954 |
| UPP1 | IL1A  | PRAD | 0.142010948  | 0.00150328  |
| UPP1 | IL1B  | PRAD | 0.310403829  | 1.46E-12    |
| UPP1 | IL2   | PRAD | 0.181712615  | 4.61E-05    |
| UPP1 | IL20  | PRAD | 0.344645847  | 2.62E-15    |
| UPP1 | IL21  | PRAD | 0.075296833  | 0.093584743 |
| UPP1 | IL22  | PRAD | 0.039620856  | 0.37809625  |
| UPP1 | IL24  | PRAD | 0.373875619  | 6.19E-18    |
| UPP1 | IL25  | PRAD | 0.128616151  | 0.004078558 |
| UPP1 | IL26  | PRAD | 0.134706673  | 0.002618956 |
| UPP1 | IL27  | PRAD | 0.131223957  | 0.003381368 |
| UPP1 | IL29  | PRAD | 0.125020248  | 0.005253271 |
| UPP1 | IL3   | PRAD | 0.021815464  | 0.627551428 |
| UPP1 | IL31  | PRAD | 0.018266901  | 0.68456511  |
| UPP1 | IL32  | PRAD | 0.542620574  | 2.14E-39    |
| UPP1 | IL33  | PRAD | 0.323447442  | 1.44E-13    |
| UPP1 | IL34  | PRAD | 0.607407798  | 1.93E-51    |
| UPP1 | IL4   | PRAD | 0.098513614  | 0.028090011 |
| UPP1 | IL5   | PRAD | 0.206380233  | 3.49E-06    |
| UPP1 | IL6   | PRAD | 0.454511312  | 1.05E-26    |
| UPP1 | IL7   | PRAD | 0.076661198  | 0.087774502 |
| UPP1 | IL8   | PRAD | 0.182554145  | 4.24E-05    |
| UPP1 | IL9   | PRAD | 0.016036491  | 0.721367187 |
| UPP1 | TGFB1 | KIRP | 0.330657185  | 7.48E-09    |
| UPP1 | TGFB2 | KIRP | -0.020785067 | 0.724029391 |
| UPP1 | TGFB3 | KIRP | 0.169063589  | 0.003822559 |
| UPP1 | VEGFA | KIRP | 0.10596027   | 0.071097968 |
| UPP1 | VEGFB | KIRP | 0.357515852  | 3.36E-10    |

|      |             |      |              |             |
|------|-------------|------|--------------|-------------|
| UPP1 | VEGFC       | KIRP | 0.103611378  | 0.077627211 |
| UPP1 | CCL11       | KIRP | 0.123740378  | 0.034868463 |
| UPP1 | CCL13       | KIRP | 0.179898497  | 0.002064431 |
| UPP1 | CCL14       | KIRP | 0.222579003  | 0.000128817 |
| UPP1 | CCL14-CCL15 | KIRP | -0.225030937 | 0.000107948 |
| UPP1 | CCL15       | KIRP | -0.2153304   | 0.000214785 |
| UPP1 | CCL1        | KIRP | 0.1378341    | 0.018653094 |
| UPP1 | CCL16       | KIRP | 0.011975625  | 0.838809202 |
| UPP1 | CCL17       | KIRP | 0.205653192  | 0.000414153 |
| UPP1 | CCL18       | KIRP | 0.019424566  | 0.741427741 |
| UPP1 | CCL19       | KIRP | 0.136935271  | 0.019444102 |
| UPP1 | CCL20       | KIRP | 0.179477136  | 0.002115867 |
| UPP1 | CCL21       | KIRP | 0.19260839   | 0.000958314 |
| UPP1 | CCL22       | KIRP | 0.214096614  | 0.000233923 |
| UPP1 | CCL23       | KIRP | 0.10143803   | 0.084093384 |
| UPP1 | CCL24       | KIRP | 0.032256264  | 0.583674754 |
| UPP1 | CCL25       | KIRP | 0.105233667  | 0.07306806  |
| UPP1 | CCL26       | KIRP | 0.174185792  | 0.002869125 |
| UPP1 | CCL2        | KIRP | 0.160842265  | 0.005961701 |
| UPP1 | CCL27       | KIRP | 0.173386085  | 0.003002098 |
| UPP1 | CCL28       | KIRP | -0.006804137 | 0.907992037 |
| UPP1 | CCL3        | KIRP | 0.217915641  | 0.000179329 |
| UPP1 | CCL3L1      | KIRP | 0.230209407  | 7.38E-05    |
| UPP1 | CCL3L3      | KIRP | 0.011190181  | 0.84925072  |
| UPP1 | CCL4        | KIRP | 0.198503492  | 0.000660204 |
| UPP1 | CCL4L2      | KIRP | 0.251039541  | 1.47E-05    |
| UPP1 | CCL5        | KIRP | 0.318884561  | 2.66E-08    |
| UPP1 | CCL7        | KIRP | 0.070471019  | 0.230737224 |
| UPP1 | CCL8        | KIRP | 0.084327691  | 0.151318971 |
| UPP1 | CROCCL1     | KIRP | 0.075130542  | 0.201277046 |
| UPP1 | CROCCL2     | KIRP | -0.062059028 | 0.291375675 |
| UPP1 | CXCL10      | KIRP | 0.041922923  | 0.476225342 |
| UPP1 | CXCL11      | KIRP | 0.05821998   | 0.32230923  |
| UPP1 | CXCL12      | KIRP | 0.090470216  | 0.123603484 |
| UPP1 | CXCL1       | KIRP | 0.036540492  | 0.534692652 |
| UPP1 | CXCL13      | KIRP | 0.101748576  | 0.083143723 |
| UPP1 | CXCL14      | KIRP | -0.148068032 | 0.011440924 |
| UPP1 | CXCL16      | KIRP | 0.132430392  | 0.023862868 |
| UPP1 | CXCL17      | KIRP | 0.120477793  | 0.039991345 |
| UPP1 | CXCL2       | KIRP | 0.170507719  | 0.003528283 |
| UPP1 | CXCL3       | KIRP | 0.197994397  | 0.000682082 |
| UPP1 | CXCL5       | KIRP | 0.073174065  | 0.213296274 |
| UPP1 | CXCL6       | KIRP | -0.043764939 | 0.457047665 |

|      |       |      |              |             |
|------|-------|------|--------------|-------------|
| UPP1 | CXCL9 | KIRP | 0.046886042  | 0.425560323 |
| UPP1 | IL10  | KIRP | 0.032290978  | 0.583269643 |
| UPP1 | IL11  | KIRP | 0.297932972  | 2.24E-07    |
| UPP1 | IL12A | KIRP | 0.020331426  | 0.729815415 |
| UPP1 | IL12B | KIRP | 0.037614411  | 0.522745974 |
| UPP1 | IL13  | KIRP | 0.162522406  | 0.005452797 |
| UPP1 | IL15  | KIRP | 0.107052017  | 0.068219481 |
| UPP1 | IL16  | KIRP | 0.13954567   | 0.017224009 |
| UPP1 | IL17A | KIRP | 0.040638123  | 0.489857145 |
| UPP1 | IL17B | KIRP | 0.224820841  | 0.000109604 |
| UPP1 | IL17C | KIRP | 0.277439932  | 1.53E-06    |
| UPP1 | IL17D | KIRP | -0.003210501 | 0.956511746 |
| UPP1 | IL17F | KIRP | -0.125516016 | 0.032322546 |
| UPP1 | IL18  | KIRP | 0.175641908  | 0.002640663 |
| UPP1 | IL19  | KIRP | 0.02014286   | 0.732225027 |
| UPP1 | IL1A  | KIRP | 0.057713626  | 0.326542793 |
| UPP1 | IL1B  | KIRP | 0.171731067  | 0.003295211 |
| UPP1 | IL2   | KIRP | 0.105727344  | 0.071724745 |
| UPP1 | IL20  | KIRP | 0.154615401  | 0.008239479 |
| UPP1 | IL21  | KIRP | -0.020271803 | 0.730577024 |
| UPP1 | IL22  | KIRP | -0.02468957  | 0.674906491 |
| UPP1 | IL24  | KIRP | -0.016591395 | 0.778074455 |
| UPP1 | IL25  | KIRP | 0.10032745   | 0.087561249 |
| UPP1 | IL26  | KIRP | -0.043235463 | 0.46251554  |
| UPP1 | IL27  | KIRP | 0.186222987  | 0.001417754 |
| UPP1 | IL29  | KIRP | 0.01305294   | 0.824533764 |
| UPP1 | IL3   | KIRP | 0.031845732  | 0.588475474 |
| UPP1 | IL31  | KIRP | 0.008918002  | 0.879598693 |
| UPP1 | IL32  | KIRP | -0.043048646 | 0.464453419 |
| UPP1 | IL33  | KIRP | 0.049390045  | 0.401235245 |
| UPP1 | IL34  | KIRP | 0.262478033  | 5.68E-06    |
| UPP1 | IL4   | KIRP | 0.118605828  | 0.043207658 |
| UPP1 | IL5   | KIRP | -0.066055582 | 0.261352117 |
| UPP1 | IL6   | KIRP | 0.242106926  | 2.99E-05    |
| UPP1 | IL7   | KIRP | -0.248989812 | 1.73E-05    |
| UPP1 | IL8   | KIRP | 0.131122088  | 0.025298505 |
| UPP1 | IL9   | KIRP | 0.034635523  | 0.556215952 |
| UPP1 | TGFB1 | PAAD | 0.500854115  | 1.08E-12    |
| UPP1 | TGFB2 | PAAD | 0.169732665  | 0.023511304 |
| UPP1 | TGFB3 | PAAD | 0.124433071  | 0.097947594 |
| UPP1 | VEGFA | PAAD | 0.218960037  | 0.003320162 |
| UPP1 | VEGFB | PAAD | 0.317332785  | 1.59E-05    |
| UPP1 | VEGFC | PAAD | 0.145779217  | 0.05218313  |

|      |             |      |              |             |
|------|-------------|------|--------------|-------------|
| UPP1 | CCL11       | PAAD | 0.079735419  | 0.290058219 |
| UPP1 | CCL13       | PAAD | 0.125725747  | 0.09448193  |
| UPP1 | CCL14       | PAAD | -0.085493498 | 0.256514336 |
| UPP1 | CCL14-CCL15 | PAAD | -0.117893285 | 0.117048837 |
| UPP1 | CCL15       | PAAD | -0.144399249 | 0.054474501 |
| UPP1 | CCL1        | PAAD | 0.096965788  | 0.197882798 |
| UPP1 | CCL16       | PAAD | -0.157046889 | 0.036303312 |
| UPP1 | CCL17       | PAAD | 0.163741783  | 0.028965284 |
| UPP1 | CCL18       | PAAD | 0.26148436   | 0.000422525 |
| UPP1 | CCL19       | PAAD | 0.05403482   | 0.473769727 |
| UPP1 | CCL20       | PAAD | 0.277478124  | 0.000176945 |
| UPP1 | CCL21       | PAAD | -0.053535417 | 0.477872429 |
| UPP1 | CCL22       | PAAD | 0.139420085  | 0.063444074 |
| UPP1 | CCL23       | PAAD | 0.152468393  | 0.042179459 |
| UPP1 | CCL24       | PAAD | 0.01419725   | 0.850806144 |
| UPP1 | CCL25       | PAAD | -0.162577596 | 0.030141933 |
| UPP1 | CCL26       | PAAD | 0.189453159  | 0.011315771 |
| UPP1 | CCL2        | PAAD | 0.092370538  | 0.220079087 |
| UPP1 | CCL27       | PAAD | 0.124534513  | 0.097672036 |
| UPP1 | CCL28       | PAAD | 0.034463236  | 0.647891552 |
| UPP1 | CCL3        | PAAD | 0.180550439  | 0.015877183 |
| UPP1 | CCL3L1      | PAAD | 0.125647244  | 0.094689581 |
| UPP1 | CCL3L3      | PAAD | -0.04690061  | 0.534161532 |
| UPP1 | CCL4        | PAAD | 0.10061176   | 0.181462828 |
| UPP1 | CCL4L2      | PAAD | 0.154943221  | 0.038911194 |
| UPP1 | CCL5        | PAAD | 0.078069276  | 0.300287197 |
| UPP1 | CCL7        | PAAD | 0.374839258  | 2.54E-07    |
| UPP1 | CCL8        | PAAD | 0.041163385  | 0.585375174 |
| UPP1 | CROCCL1     | PAAD | 0.054999481  | 0.465899491 |
| UPP1 | CROCCL2     | PAAD | -0.031099525 | 0.680269125 |
| UPP1 | CXCL10      | PAAD | 0.10624459   | 0.158099783 |
| UPP1 | CXCL11      | PAAD | 0.029222732  | 0.698596466 |
| UPP1 | CXCL12      | PAAD | -0.120611415 | 0.108784616 |
| UPP1 | CXCL1       | PAAD | 0.175513057  | 0.019110987 |
| UPP1 | CXCL13      | PAAD | -0.001208331 | 0.987228347 |
| UPP1 | CXCL14      | PAAD | 0.056406213  | 0.454552768 |
| UPP1 | CXCL16      | PAAD | 0.18632693   | 0.012765519 |
| UPP1 | CXCL17      | PAAD | 0.154447383  | 0.039548343 |
| UPP1 | CXCL2       | PAAD | 0.13393802   | 0.074682998 |
| UPP1 | CXCL3       | PAAD | 0.180160555  | 0.016109219 |
| UPP1 | CXCL5       | PAAD | 0.240253235  | 0.001236858 |
| UPP1 | CXCL6       | PAAD | 0.116523464  | 0.121394832 |
| UPP1 | CXCL9       | PAAD | -0.023763533 | 0.752871083 |

|      |       |      |              |             |
|------|-------|------|--------------|-------------|
| UPP1 | IL10  | PAAD | 0.045682485  | 0.544845068 |
| UPP1 | IL11  | PAAD | 0.367548233  | 4.49E-07    |
| UPP1 | IL12A | PAAD | 0.016982731  | 0.821980975 |
| UPP1 | IL12B | PAAD | 0.075034072  | 0.319526899 |
| UPP1 | IL13  | PAAD | -0.032116492 | 0.670415043 |
| UPP1 | IL15  | PAAD | 0.165831177  | 0.026951711 |
| UPP1 | IL16  | PAAD | -0.027579403 | 0.714788724 |
| UPP1 | IL17A | PAAD | -0.167933195 | 0.02504809  |
| UPP1 | IL17B | PAAD | 0.179981806  | 0.016216584 |
| UPP1 | IL17C | PAAD | 0.209404642  | 0.005027069 |
| UPP1 | IL17D | PAAD | 0.032177531  | 0.66982536  |
| UPP1 | IL17F | PAAD | -0.000645614 | 0.993175876 |
| UPP1 | IL18  | PAAD | 0.299775066  | 4.80E-05    |
| UPP1 | IL19  | PAAD | -0.007051164 | 0.925575751 |
| UPP1 | IL1A  | PAAD | 0.36744565   | 4.53E-07    |
| UPP1 | IL1B  | PAAD | 0.110662189  | 0.141416538 |
| UPP1 | IL2   | PAAD | -0.020780258 | 0.78307063  |
| UPP1 | IL20  | PAAD | 0.015404395  | 0.838287523 |
| UPP1 | IL21  | PAAD | -0.030453576 | 0.686556529 |
| UPP1 | IL22  | PAAD | 0.010457407  | 0.889813618 |
| UPP1 | IL24  | PAAD | 0.064468537  | 0.39258015  |
| UPP1 | IL25  | PAAD | -0.043960728 | 0.560122927 |
| UPP1 | IL26  | PAAD | -0.202043044 | 0.006839711 |
| UPP1 | IL27  | PAAD | 0.350119042  | 1.66E-06    |
| UPP1 | IL29  | PAAD | 0.191995047  | 0.010245912 |
| UPP1 | IL3   | PAAD | -0.006267188 | 0.933830512 |
| UPP1 | IL31  | PAAD | 0.032874917  | 0.663102455 |
| UPP1 | IL32  | PAAD | 0.371119765  | 3.40E-07    |
| UPP1 | IL33  | PAAD | -0.221316752 | 0.002989301 |
| UPP1 | IL34  | PAAD | 0.179783716  | 0.016336294 |
| UPP1 | IL4   | PAAD | -0.161564177 | 0.031199121 |
| UPP1 | IL5   | PAAD | -0.08242608  | 0.274035776 |
| UPP1 | IL6   | PAAD | 0.116576504  | 0.121224259 |
| UPP1 | IL7   | PAAD | -0.15099877  | 0.04422704  |
| UPP1 | IL8   | PAAD | 0.2292891    | 0.002079282 |
| UPP1 | IL9   | PAAD | -0.054426595 | 0.470564704 |
| UPP1 | TGFB1 | SARC | 0.484027745  | 8.57E-17    |
| UPP1 | TGFB2 | SARC | -0.364934346 | 1.13E-09    |
| UPP1 | TGFB3 | SARC | -0.076348484 | 0.218062023 |
| UPP1 | VEGFA | SARC | 0.117555002  | 0.057395124 |
| UPP1 | VEGFB | SARC | 0.376011906  | 3.18E-10    |
| UPP1 | VEGFC | SARC | 0.424353327  | 7.07E-13    |
| UPP1 | CCL11 | SARC | 0.215410591  | 0.000445811 |

|      |             |      |              |             |
|------|-------------|------|--------------|-------------|
| UPP1 | CCL13       | SARC | 0.346311402  | 8.52E-09    |
| UPP1 | CCL14       | SARC | 0.110525546  | 0.074110011 |
| UPP1 | CCL14-CCL15 | SARC | 0.154932921  | 0.012039048 |
| UPP1 | CCL15       | SARC | 0.18688595   | 0.002386649 |
| UPP1 | CCL1        | SARC | 0.329225265  | 4.86E-08    |
| UPP1 | CCL16       | SARC | 0.018887211  | 0.76091338  |
| UPP1 | CCL17       | SARC | 0.248960123  | 4.60E-05    |
| UPP1 | CCL18       | SARC | 0.457294763  | 6.06E-15    |
| UPP1 | CCL19       | SARC | 0.220048764  | 0.000332129 |
| UPP1 | CCL20       | SARC | 0.353511799  | 3.96E-09    |
| UPP1 | CCL21       | SARC | 0.136076443  | 0.027643291 |
| UPP1 | CCL22       | SARC | 0.304352244  | 5.10E-07    |
| UPP1 | CCL23       | SARC | 0.359993767  | 1.95E-09    |
| UPP1 | CCL24       | SARC | 0.06060311   | 0.328492379 |
| UPP1 | CCL25       | SARC | -0.080982066 | 0.191318437 |
| UPP1 | CCL26       | SARC | 0.408081872  | 6.18E-12    |
| UPP1 | CCL2        | SARC | 0.410972483  | 4.24E-12    |
| UPP1 | CCL27       | SARC | 0.094339278  | 0.127730688 |
| UPP1 | CCL28       | SARC | -0.092468427 | 0.135495936 |
| UPP1 | CCL3        | SARC | 0.42482789   | 6.63E-13    |
| UPP1 | CCL3L1      | SARC | 0.32128058   | 1.05E-07    |
| UPP1 | CCL3L3      | SARC | 0.099675446  | 0.107466708 |
| UPP1 | CCL4        | SARC | 0.474546082  | 4.05E-16    |
| UPP1 | CCL4L2      | SARC | 0.406787043  | 7.31E-12    |
| UPP1 | CCL5        | SARC | 0.442228699  | 5.70E-14    |
| UPP1 | CCL7        | SARC | 0.409435567  | 5.18E-12    |
| UPP1 | CCL8        | SARC | 0.353429422  | 3.99E-09    |
| UPP1 | CROCCL1     | SARC | -0.110500237 | 0.074176667 |
| UPP1 | CROCCL2     | SARC | -0.317618826 | 1.49E-07    |
| UPP1 | CXCL10      | SARC | 0.332548067  | 3.49E-08    |
| UPP1 | CXCL11      | SARC | 0.266003868  | 1.28E-05    |
| UPP1 | CXCL12      | SARC | -0.018943616 | 0.760221098 |
| UPP1 | CXCL1       | SARC | 0.290346255  | 1.75E-06    |
| UPP1 | CXCL13      | SARC | 0.30784816   | 3.71E-07    |
| UPP1 | CXCL14      | SARC | 0.020723801  | 0.738473163 |
| UPP1 | CXCL16      | SARC | 0.380323705  | 1.92E-10    |
| UPP1 | CXCL17      | SARC | -0.11605901  | 0.0606634   |
| UPP1 | CXCL2       | SARC | 0.328961581  | 4.99E-08    |
| UPP1 | CXCL3       | SARC | 0.38114584   | 1.74E-10    |
| UPP1 | CXCL5       | SARC | 0.215301519  | 0.000448875 |
| UPP1 | CXCL6       | SARC | 0.205203849  | 0.000833991 |
| UPP1 | CXCL9       | SARC | 0.285338544  | 2.67E-06    |
| UPP1 | IL10        | SARC | 0.426993242  | 4.92E-13    |



|      |       |      |              |             |
|------|-------|------|--------------|-------------|
| UPP1 | IL11  | SARC | 0.051192265  | 0.409258975 |
| UPP1 | IL12A | SARC | 0.035473214  | 0.567580379 |
| UPP1 | IL12B | SARC | 0.148848616  | 0.015897831 |
| UPP1 | IL13  | SARC | 0.114682595  | 0.063804416 |
| UPP1 | IL15  | SARC | 0.394175733  | 3.60E-11    |
| UPP1 | IL16  | SARC | 0.308114835  | 3.62E-07    |
| UPP1 | IL17A | SARC | -0.025395328 | 0.682422387 |
| UPP1 | IL17B | SARC | -0.047787857 | 0.441148249 |
| UPP1 | IL17C | SARC | -0.104716412 | 0.090735206 |
| UPP1 | IL17D | SARC | -0.132006513 | 0.032691577 |
| UPP1 | IL17F | SARC | 0.033736406  | 0.586706317 |
| UPP1 | IL18  | SARC | 0.491827356  | 2.30E-17    |
| UPP1 | IL19  | SARC | 0.180113762  | 0.003439939 |
| UPP1 | IL1A  | SARC | 0.223608948  | 0.000263853 |
| UPP1 | IL1B  | SARC | 0.382718664  | 1.45E-10    |
| UPP1 | IL2   | SARC | 0.100706715  | 0.103859559 |
| UPP1 | IL20  | SARC | 0.046359197  | 0.454941028 |
| UPP1 | IL21  | SARC | 0.073386335  | 0.236500678 |
| UPP1 | IL22  | SARC | -0.00822756  | 0.894557055 |
| UPP1 | IL24  | SARC | 0.179881835  | 0.003482516 |
| UPP1 | IL25  | SARC | -0.119738611 | 0.052887093 |
| UPP1 | IL26  | SARC | 0.189890766  | 0.002021262 |
| UPP1 | IL27  | SARC | 0.353033207  | 4.17E-09    |
| UPP1 | IL29  | SARC | 0.213296537  | 0.000508791 |
| UPP1 | IL3   | SARC | 0.008671826  | 0.888899206 |
| UPP1 | IL31  | SARC | 0.064090519  | 0.301370779 |
| UPP1 | IL32  | SARC | 0.439927627  | 7.94E-14    |
| UPP1 | IL33  | SARC | -0.001544231 | 0.980153828 |
| UPP1 | IL34  | SARC | 0.1371455    | 0.026433805 |
| UPP1 | IL4   | SARC | 0.044473644  | 0.473508918 |
| UPP1 | IL5   | SARC | 0.125711556  | 0.042036114 |
| UPP1 | IL6   | SARC | 0.359832711  | 1.99E-09    |
| UPP1 | IL7   | SARC | 0.164228665  | 0.007729282 |
| UPP1 | IL8   | SARC | 0.315553178  | 1.82E-07    |
| UPP1 | IL9   | SARC | -0.061331834 | 0.322698878 |
| UPP1 | TGFB1 | CEC  | 0.460296661  | 2.12E-17    |
| UPP1 | TGFB2 | CEC  | 0.126878288  | 0.026712233 |
| UPP1 | TGFB3 | CEC  | -0.054255596 | 0.344996789 |
| UPP1 | VEGFA | CEC  | 0.10746733   | 0.060853004 |
| UPP1 | VEGFB | CEC  | 0.01686673   | 0.769234662 |
| UPP1 | VEGFC | CEC  | 0.266782257  | 2.29E-06    |
| UPP1 | CCL11 | CEC  | 0.097729533  | 0.088409935 |
| UPP1 | CCL13 | CEC  | 0.258546109  | 4.77E-06    |

|      |             |      |              |             |
|------|-------------|------|--------------|-------------|
| UPP1 | CCL14       | CESC | -0.092774833 | 0.105861172 |
| UPP1 | CCL14-CCL15 | CESC | -0.127033512 | 0.02652551  |
| UPP1 | CCL15       | CESC | -0.20183095  | 0.000389758 |
| UPP1 | CCL1        | CESC | 0.168481821  | 0.00316282  |
| UPP1 | CCL16       | CESC | -0.115311791 | 0.044190216 |
| UPP1 | CCL17       | CESC | 0.161440791  | 0.004707021 |
| UPP1 | CCL18       | CESC | 0.294987952  | 1.54E-07    |
| UPP1 | CCL19       | CESC | 0.029520135  | 0.607572212 |
| UPP1 | CCL20       | CESC | 0.257075315  | 5.42E-06    |
| UPP1 | CCL21       | CESC | 0.154411637  | 0.006895834 |
| UPP1 | CCL22       | CESC | 0.23012825   | 4.97E-05    |
| UPP1 | CCL23       | CESC | 0.111203254  | 0.052364094 |
| UPP1 | CCL24       | CESC | 0.03829334   | 0.505243122 |
| UPP1 | CCL25       | CESC | -0.051454465 | 0.370510708 |
| UPP1 | CCL26       | CESC | 0.303862679  | 6.18E-08    |
| UPP1 | CCL2        | CESC | 0.170380182  | 0.002833921 |
| UPP1 | CCL27       | CESC | 0.187567294  | 0.000996431 |
| UPP1 | CCL28       | CESC | -0.179787711 | 0.001617719 |
| UPP1 | CCL3        | CESC | 0.368459383  | 3.06E-11    |
| UPP1 | CCL3L1      | CESC | 0.246756095  | 1.30E-05    |
| UPP1 | CCL3L3      | CESC | 0.042467127  | 0.459940644 |
| UPP1 | CCL4        | CESC | 0.269393284  | 1.81E-06    |
| UPP1 | CCL4L2      | CESC | 0.228958244  | 5.44E-05    |
| UPP1 | CCL5        | CESC | 0.212558031  | 0.000184205 |
| UPP1 | CCL7        | CESC | 0.226233451  | 6.70E-05    |
| UPP1 | CCL8        | CESC | 0.19711065   | 0.000535614 |
| UPP1 | CROCCL1     | CESC | -0.347121314 | 4.60E-10    |
| UPP1 | CROCCL2     | CESC | -0.421342484 | 1.48E-14    |
| UPP1 | CXCL10      | CESC | 0.271920179  | 1.43E-06    |
| UPP1 | CXCL11      | CESC | 0.305761155  | 5.06E-08    |
| UPP1 | CXCL12      | CESC | -0.11761118  | 0.040103018 |
| UPP1 | CXCL1       | CESC | 0.224767621  | 7.49E-05    |
| UPP1 | CXCL13      | CESC | 0.207650745  | 0.000260761 |
| UPP1 | CXCL14      | CESC | 0.016983724  | 0.767679626 |
| UPP1 | CXCL16      | CESC | 0.065587056  | 0.253472564 |
| UPP1 | CXCL17      | CESC | 0.007492054  | 0.89632301  |
| UPP1 | CXCL2       | CESC | 0.154595329  | 0.006828658 |
| UPP1 | CXCL3       | CESC | 0.054162427  | 0.34582706  |
| UPP1 | CXCL5       | CESC | 0.008364723  | 0.884326914 |
| UPP1 | CXCL6       | CESC | 0.079877287  | 0.164075936 |
| UPP1 | CXCL9       | CESC | 0.168582752  | 0.003144498 |
| UPP1 | IL10        | CESC | 0.215804272  | 0.00014573  |
| UPP1 | IL11        | CESC | 0.335429898  | 1.87E-09    |

|      |       |      |              |             |
|------|-------|------|--------------|-------------|
| UPP1 | IL12A | CESC | -0.336192816 | 1.71E-09    |
| UPP1 | IL12B | CESC | -0.036918103 | 0.520666371 |
| UPP1 | IL13  | CESC | 0.12357467   | 0.030962573 |
| UPP1 | IL15  | CESC | 0.169373694  | 0.003004214 |
| UPP1 | IL16  | CESC | 0.140539934  | 0.014027813 |
| UPP1 | IL17A | CESC | -0.00190123  | 0.973620955 |
| UPP1 | IL17B | CESC | 0.135238104  | 0.018127688 |
| UPP1 | IL17C | CESC | 0.032933338  | 0.566678679 |
| UPP1 | IL17D | CESC | -0.241673341 | 1.98E-05    |
| UPP1 | IL17F | CESC | 0.024000745  | 0.676317084 |
| UPP1 | IL18  | CESC | 0.443366752  | 4.05E-16    |
| UPP1 | IL19  | CESC | 0.005666255  | 0.921494498 |
| UPP1 | IL1A  | CESC | 0.585334208  | 1.95E-29    |
| UPP1 | IL1B  | CESC | 0.457872747  | 3.27E-17    |
| UPP1 | IL2   | CESC | -0.093712285 | 0.102365746 |
| UPP1 | IL20  | CESC | 0.261787202  | 3.58E-06    |
| UPP1 | IL21  | CESC | 0.00266335   | 0.963053205 |
| UPP1 | IL22  | CESC | 0.133353567  | 0.01981821  |
| UPP1 | IL24  | CESC | 0.338620182  | 1.28E-09    |
| UPP1 | IL25  | CESC | 0.015260754  | 0.790671508 |
| UPP1 | IL26  | CESC | 0.046543931  | 0.417965354 |
| UPP1 | IL27  | CESC | 0.177310861  | 0.001880057 |
| UPP1 | IL29  | CESC | 0.206537762  | 0.000281836 |
| UPP1 | IL3   | CESC | 0.031627583  | 0.582167356 |
| UPP1 | IL31  | CESC | 0.007973709  | 0.889698872 |
| UPP1 | IL32  | CESC | 0.270735114  | 1.60E-06    |
| UPP1 | IL33  | CESC | 0.057462919  | 0.317188186 |
| UPP1 | IL34  | CESC | 0.043622055  | 0.447816849 |
| UPP1 | IL4   | CESC | -0.02813475  | 0.624536142 |
| UPP1 | IL5   | CESC | 0.047907566  | 0.404442713 |
| UPP1 | IL6   | CESC | 0.199790215  | 0.000447576 |
| UPP1 | IL7   | CESC | 0.009557163  | 0.867978217 |
| UPP1 | IL8   | CESC | 0.279811197  | 6.83E-07    |
| UPP1 | IL9   | CESC | 0.043864214  | 0.445297915 |
| UPP1 | TGFB1 | COAD | 0.306093908  | 2.79E-11    |
| UPP1 | TGFB2 | COAD | -0.056412969 | 0.230792756 |
| UPP1 | TGFB3 | COAD | 0.099021725  | 0.035124875 |
| UPP1 | VEGFA | COAD | -0.028543363 | 0.544543892 |
| UPP1 | VEGFB | COAD | 0.098823539  | 0.035493909 |
| UPP1 | VEGFC | COAD | 0.133117626  | 0.004538847 |
| UPP1 | CCL11 | COAD | 0.039151715  | 0.405796495 |
| UPP1 | CCL13 | COAD | 0.294111043  | 1.72E-10    |
| UPP1 | CCL14 | COAD | 0.041565227  | 0.377450762 |

|      |             |      |              |             |
|------|-------------|------|--------------|-------------|
| UPP1 | CCL14-CCL15 | COAD | -0.045651134 | 0.332320495 |
| UPP1 | CCL15       | COAD | 0.057093889  | 0.225203696 |
| UPP1 | CCL1        | COAD | 0.109931459  | 0.019263531 |
| UPP1 | CCL16       | COAD | -0.026830656 | 0.568960559 |
| UPP1 | CCL17       | COAD | 0.201378133  | 1.57E-05    |
| UPP1 | CCL18       | COAD | 0.261095182  | 1.70E-08    |
| UPP1 | CCL19       | COAD | 0.150285918  | 0.001336356 |
| UPP1 | CCL20       | COAD | -0.017993083 | 0.702510349 |
| UPP1 | CCL21       | COAD | 0.106513756  | 0.023377604 |
| UPP1 | CCL22       | COAD | 0.206993017  | 8.93E-06    |
| UPP1 | CCL23       | COAD | 0.229118286  | 8.28E-07    |
| UPP1 | CCL24       | COAD | -0.141115044 | 0.002610392 |
| UPP1 | CCL25       | COAD | 0.045602801  | 0.332833174 |
| UPP1 | CCL26       | COAD | 0.167921445  | 0.000331119 |
| UPP1 | CCL2        | COAD | 0.206905788  | 9.01E-06    |
| UPP1 | CCL27       | COAD | 0.119086683  | 0.011191991 |
| UPP1 | CCL28       | COAD | 0.058585993  | 0.213294846 |
| UPP1 | CCL3        | COAD | 0.424268198  | 3.22E-21    |
| UPP1 | CCL3L1      | COAD | 0.350754664  | 1.47E-14    |
| UPP1 | CCL3L3      | COAD | 0.155704889  | 0.000883752 |
| UPP1 | CCL4        | COAD | 0.344468828  | 4.58E-14    |
| UPP1 | CCL4L2      | COAD | 0.341830492  | 7.33E-14    |
| UPP1 | CCL5        | COAD | 0.354638435  | 7.16E-15    |
| UPP1 | CCL7        | COAD | 0.261109884  | 1.70E-08    |
| UPP1 | CCL8        | COAD | 0.290447496  | 2.96E-10    |
| UPP1 | CROCCL1     | COAD | -0.083303169 | 0.076529336 |
| UPP1 | CROCCL2     | COAD | -0.073190791 | 0.119812559 |
| UPP1 | CXCL10      | COAD | 0.245448643  | 1.22E-07    |
| UPP1 | CXCL11      | COAD | 0.235043886  | 4.20E-07    |
| UPP1 | CXCL12      | COAD | -0.07395321  | 0.115994806 |
| UPP1 | CXCL1       | COAD | 0.267070416  | 7.75E-09    |
| UPP1 | CXCL13      | COAD | 0.23751381   | 3.14E-07    |
| UPP1 | CXCL14      | COAD | -0.256927803 | 2.91E-08    |
| UPP1 | CXCL16      | COAD | 0.204808017  | 1.11E-05    |
| UPP1 | CXCL17      | COAD | 0.143105138  | 0.002264648 |
| UPP1 | CXCL2       | COAD | 0.133764202  | 0.004344904 |
| UPP1 | CXCL3       | COAD | 0.213720199  | 4.45E-06    |
| UPP1 | CXCL5       | COAD | 0.243007831  | 1.64E-07    |
| UPP1 | CXCL6       | COAD | 0.173535019  | 0.000206054 |
| UPP1 | CXCL9       | COAD | 0.195789244  | 2.71E-05    |
| UPP1 | IL10        | COAD | 0.221087142  | 2.02E-06    |
| UPP1 | IL11        | COAD | 0.330838984  | 4.95E-13    |
| UPP1 | IL12A       | COAD | -0.009681745 | 0.837181679 |

|      |             |      |              |             |
|------|-------------|------|--------------|-------------|
| UPP1 | IL12B       | COAD | 0.119447447  | 0.010946989 |
| UPP1 | IL13        | COAD | 0.174243396  | 0.000193878 |
| UPP1 | IL15        | COAD | 0.240688194  | 2.16E-07    |
| UPP1 | IL16        | COAD | 0.108004045  | 0.021498473 |
| UPP1 | IL17A       | COAD | -0.075828798 | 0.10700832  |
| UPP1 | IL17B       | COAD | 0.141410868  | 0.002556125 |
| UPP1 | IL17C       | COAD | 0.212039916  | 5.30E-06    |
| UPP1 | IL17D       | COAD | 0.02974694   | 0.52770167  |
| UPP1 | IL17F       | COAD | -0.04609562  | 0.327629605 |
| UPP1 | IL18        | COAD | 0.204996389  | 1.09E-05    |
| UPP1 | IL19        | COAD | 0.141320169  | 0.002572653 |
| UPP1 | IL1A        | COAD | 0.239111734  | 2.60E-07    |
| UPP1 | IL1B        | COAD | 0.323563088  | 1.68E-12    |
| UPP1 | IL2         | COAD | 0.004523009  | 0.923519523 |
| UPP1 | IL20        | COAD | 0.108640597  | 0.020736669 |
| UPP1 | IL21        | COAD | 0.126490095  | 0.007026491 |
| UPP1 | IL22        | COAD | 0.107989574  | 0.02151607  |
| UPP1 | IL24        | COAD | 0.291173612  | 2.66E-10    |
| UPP1 | IL25        | COAD | 0.122534973  | 0.009037073 |
| UPP1 | IL26        | COAD | -0.056004239 | 0.234194467 |
| UPP1 | IL27        | COAD | 0.199349085  | 1.92E-05    |
| UPP1 | IL29        | COAD | 0.099007356  | 0.035151521 |
| UPP1 | IL3         | COAD | 0.121425203  | 0.009686418 |
| UPP1 | IL31        | COAD | 0.120332438  | 0.010365985 |
| UPP1 | IL32        | COAD | 0.243829328  | 1.48E-07    |
| UPP1 | IL33        | COAD | 0.041789112  | 0.374884446 |
| UPP1 | IL34        | COAD | -0.078267657 | 0.096155716 |
| UPP1 | IL4         | COAD | 0.126317038  | 0.007105298 |
| UPP1 | IL5         | COAD | 0.089566358  | 0.056796297 |
| UPP1 | IL6         | COAD | 0.29224587   | 2.27E-10    |
| UPP1 | IL7         | COAD | 0.068306083  | 0.146642978 |
| UPP1 | IL8         | COAD | 0.316997259  | 4.94E-12    |
| UPP1 | IL9         | COAD | 0.120376664  | 0.010337681 |
| UPP1 | TGFB1       | LUSC | 0.380602386  | 9.47E-19    |
| UPP1 | TGFB2       | LUSC | -0.101448821 | 0.023014243 |
| UPP1 | TGFB3       | LUSC | 0.046439956  | 0.29905118  |
| UPP1 | VEGFA       | LUSC | 0.104725968  | 0.018923715 |
| UPP1 | VEGFB       | LUSC | 0.146483517  | 0.000996171 |
| UPP1 | VEGFC       | LUSC | 0.248864428  | 1.59E-08    |
| UPP1 | CCL11       | LUSC | 0.192177188  | 1.45E-05    |
| UPP1 | CCL13       | LUSC | 0.17175085   | 0.000110038 |
| UPP1 | CCL14       | LUSC | -0.01396992  | 0.754861174 |
| UPP1 | CCL14-CCL15 | LUSC | 0.093460002  | 0.036316294 |

|      |         |      |              |             |
|------|---------|------|--------------|-------------|
| UPP1 | CCL15   | LUSC | 0.099838668  | 0.025290518 |
| UPP1 | CCL1    | LUSC | -0.056396964 | 0.207147403 |
| UPP1 | CCL16   | LUSC | -0.011104686 | 0.80398597  |
| UPP1 | CCL17   | LUSC | 0.18580178   | 2.80E-05    |
| UPP1 | CCL18   | LUSC | 0.110816538  | 0.012978803 |
| UPP1 | CCL19   | LUSC | -0.076890374 | 0.085248988 |
| UPP1 | CCL20   | LUSC | 0.28264209   | 1.13E-10    |
| UPP1 | CCL21   | LUSC | 0.082000746  | 0.066391911 |
| UPP1 | CCL22   | LUSC | 0.222436098  | 4.79E-07    |
| UPP1 | CCL23   | LUSC | 0.164074143  | 0.000222475 |
| UPP1 | CCL24   | LUSC | 0.212200584  | 1.61E-06    |
| UPP1 | CCL25   | LUSC | -0.083858623 | 0.060448692 |
| UPP1 | CCL26   | LUSC | 0.252430676  | 9.76E-09    |
| UPP1 | CCL2    | LUSC | 0.089919755  | 0.044036559 |
| UPP1 | CCL27   | LUSC | -0.016529386 | 0.711793232 |
| UPP1 | CCL28   | LUSC | 0.005834504  | 0.896250473 |
| UPP1 | CCL3    | LUSC | 0.221818748  | 5.16E-07    |
| UPP1 | CCL3L1  | LUSC | 0.188858808  | 2.05E-05    |
| UPP1 | CCL3L3  | LUSC | 0.006330877  | 0.887480205 |
| UPP1 | CCL4    | LUSC | 0.0975031    | 0.028936344 |
| UPP1 | CCL4L2  | LUSC | 0.130296914  | 0.003449569 |
| UPP1 | CCL5    | LUSC | 0.029885204  | 0.504089761 |
| UPP1 | CCL7    | LUSC | 0.158763164  | 0.000355687 |
| UPP1 | CCL8    | LUSC | 0.099370827  | 0.025987298 |
| UPP1 | CROCCL1 | LUSC | -0.273178809 | 4.84E-10    |
| UPP1 | CROCCL2 | LUSC | -0.330089814 | 3.17E-14    |
| UPP1 | CXCL10  | LUSC | 0.046103978  | 0.302564627 |
| UPP1 | CXCL11  | LUSC | 0.080301816  | 0.072238915 |
| UPP1 | CXCL12  | LUSC | -0.071954253 | 0.107347777 |
| UPP1 | CXCL1   | LUSC | 0.365843469  | 2.41E-17    |
| UPP1 | CXCL13  | LUSC | -0.04996642  | 0.263813642 |
| UPP1 | CXCL14  | LUSC | 0.064688319  | 0.147821911 |
| UPP1 | CXCL16  | LUSC | 0.179472825  | 5.25E-05    |
| UPP1 | CXCL17  | LUSC | 0.117524191  | 0.008395235 |
| UPP1 | CXCL2   | LUSC | 0.240353516  | 4.98E-08    |
| UPP1 | CXCL3   | LUSC | 0.281202872  | 1.41E-10    |
| UPP1 | CXCL5   | LUSC | 0.31134771   | 9.57E-13    |
| UPP1 | CXCL6   | LUSC | 0.162071029  | 0.000266    |
| UPP1 | CXCL9   | LUSC | -0.079457559 | 0.075297172 |
| UPP1 | IL10    | LUSC | 0.100628858  | 0.024150234 |
| UPP1 | IL11    | LUSC | 0.306256147  | 2.32E-12    |
| UPP1 | IL12A   | LUSC | -0.229951685 | 1.90E-07    |
| UPP1 | IL12B   | LUSC | -0.054959969 | 0.218975391 |

|      |             |      |              |             |
|------|-------------|------|--------------|-------------|
| UPP1 | IL13        | LUSC | -0.007293615 | 0.870509906 |
| UPP1 | IL15        | LUSC | 0.027541865  | 0.538116458 |
| UPP1 | IL16        | LUSC | -0.044936049 | 0.314990296 |
| UPP1 | IL17A       | LUSC | -0.053209077 | 0.234030854 |
| UPP1 | IL17B       | LUSC | 0.08180314   | 0.06705135  |
| UPP1 | IL17C       | LUSC | 0.193450289  | 1.27E-05    |
| UPP1 | IL17D       | LUSC | -0.10759426  | 0.015879091 |
| UPP1 | IL17F       | LUSC | -0.075891796 | 0.089395672 |
| UPP1 | IL18        | LUSC | 0.338071106  | 6.91E-15    |
| UPP1 | IL19        | LUSC | -0.067341941 | 0.131869701 |
| UPP1 | IL1A        | LUSC | 0.597661473  | 6.21E-50    |
| UPP1 | IL1B        | LUSC | 0.445745775  | 7.08E-26    |
| UPP1 | IL2         | LUSC | -0.082754263 | 0.063926028 |
| UPP1 | IL20        | LUSC | 0.139681581  | 0.001705658 |
| UPP1 | IL21        | LUSC | -0.067827976 | 0.129097685 |
| UPP1 | IL22        | LUSC | 0.001045452  | 0.981358852 |
| UPP1 | IL24        | LUSC | 0.35573702   | 2.02E-16    |
| UPP1 | IL25        | LUSC | -0.032957391 | 0.461255266 |
| UPP1 | IL26        | LUSC | -0.033678917 | 0.45149761  |
| UPP1 | IL27        | LUSC | 0.031495057  | 0.481386991 |
| UPP1 | IL29        | LUSC | 0.151166337  | 0.000678707 |
| UPP1 | IL3         | LUSC | -0.002341496 | 0.958264686 |
| UPP1 | IL31        | LUSC | 0.019761634  | 0.658702103 |
| UPP1 | IL32        | LUSC | 0.200348475  | 6.08E-06    |
| UPP1 | IL33        | LUSC | 0.062406444  | 0.162680153 |
| UPP1 | IL34        | LUSC | -0.107335701 | 0.016134733 |
| UPP1 | IL4         | LUSC | -0.010421734 | 0.815818183 |
| UPP1 | IL5         | LUSC | -0.010383767 | 0.816477216 |
| UPP1 | IL6         | LUSC | 0.233491565  | 1.21E-07    |
| UPP1 | IL7         | LUSC | 0.102346274  | 0.021824212 |
| UPP1 | IL8         | LUSC | 0.38849474   | 1.56E-19    |
| UPP1 | IL9         | LUSC | 0.043808227  | 0.327302176 |
| UPP1 | TGFB1       | READ | 0.349699649  | 5.44E-06    |
| UPP1 | TGFB2       | READ | -0.06591166  | 0.40613606  |
| UPP1 | TGFB3       | READ | 0.133157742  | 0.092196235 |
| UPP1 | VEGFA       | READ | -0.115519372 | 0.1444976   |
| UPP1 | VEGFB       | READ | 0.205718371  | 0.008844743 |
| UPP1 | VEGFC       | READ | 0.185252625  | 0.018638745 |
| UPP1 | CCL11       | READ | 0.304597706  | 8.55E-05    |
| UPP1 | CCL13       | READ | 0.332271534  | 1.66E-05    |
| UPP1 | CCL14       | READ | 0.155795504  | 0.048440032 |
| UPP1 | CCL14-CCL15 | READ | -0.079812753 | 0.314210708 |
| UPP1 | CCL15       | READ | 0.086068355  | 0.277659774 |

|      |         |      |              |             |
|------|---------|------|--------------|-------------|
| UPP1 | CCL1    | READ | 0.194828647  | 0.013263445 |
| UPP1 | CCL16   | READ | -0.07511982  | 0.3436002   |
| UPP1 | CCL17   | READ | 0.294286891  | 0.000151105 |
| UPP1 | CCL18   | READ | 0.24722728   | 0.001568248 |
| UPP1 | CCL19   | READ | 0.082917524  | 0.295695173 |
| UPP1 | CCL20   | READ | -0.194306972 | 0.013516774 |
| UPP1 | CCL21   | READ | 0.293688592  | 0.000156084 |
| UPP1 | CCL22   | READ | 0.292843616  | 0.000163377 |
| UPP1 | CCL23   | READ | 0.252079182  | 0.001255945 |
| UPP1 | CCL24   | READ | -0.14705452  | 0.062672607 |
| UPP1 | CCL25   | READ | -0.150179734 | 0.057234198 |
| UPP1 | CCL26   | READ | 0.129624723  | 0.101242511 |
| UPP1 | CCL2    | READ | 0.304388476  | 8.65E-05    |
| UPP1 | CCL27   | READ | 0.108817881  | 0.169420105 |
| UPP1 | CCL28   | READ | -0.049482998 | 0.533048874 |
| UPP1 | CCL3    | READ | 0.423660705  | 2.15E-08    |
| UPP1 | CCL3L1  | READ | 0.324844446  | 2.62E-05    |
| UPP1 | CCL3L3  | READ | 0.091417006  | 0.248774818 |
| UPP1 | CCL4    | READ | 0.279803507  | 0.000324743 |
| UPP1 | CCL4L2  | READ | 0.288980324  | 0.000200951 |
| UPP1 | CCL5    | READ | 0.223054073  | 0.004453593 |
| UPP1 | CCL7    | READ | 0.248314546  | 0.00149267  |
| UPP1 | CCL8    | READ | 0.291198602  | 0.000178495 |
| UPP1 | CROCCL1 | READ | -0.012335146 | 0.876583385 |
| UPP1 | CROCCL2 | READ | -0.030585492 | 0.700124352 |
| UPP1 | CXCL10  | READ | 0.216437014  | 0.005821948 |
| UPP1 | CXCL11  | READ | 0.075687317  | 0.339956618 |
| UPP1 | CXCL12  | READ | 0.066095638  | 0.404824237 |
| UPP1 | CXCL1   | READ | 0.148630021  | 0.059880289 |
| UPP1 | CXCL13  | READ | 0.055810505  | 0.481939583 |
| UPP1 | CXCL14  | READ | -0.040367711 | 0.611155255 |
| UPP1 | CXCL16  | READ | 0.049900958  | 0.529591056 |
| UPP1 | CXCL17  | READ | 0.012566219  | 0.874290301 |
| UPP1 | CXCL2   | READ | -0.06323902  | 0.425474818 |
| UPP1 | CXCL3   | READ | 0.083106399  | 0.294592644 |
| UPP1 | CXCL5   | READ | 0.154593258  | 0.050221558 |
| UPP1 | CXCL6   | READ | 0.061668309  | 0.437084342 |
| UPP1 | CXCL9   | READ | 0.065761173  | 0.407210951 |
| UPP1 | IL10    | READ | 0.275933946  | 0.000395653 |
| UPP1 | IL11    | READ | 0.324573775  | 2.66E-05    |
| UPP1 | IL12A   | READ | -0.313161123 | 5.24E-05    |
| UPP1 | IL12B   | READ | -0.13500726  | 0.087723801 |
| UPP1 | IL13    | READ | 0.03376024   | 0.670725241 |



|      |             |      |              |             |
|------|-------------|------|--------------|-------------|
| UPP1 | IL15        | READ | 0.10051687   | 0.204550222 |
| UPP1 | IL16        | READ | 0.081981969  | 0.301196619 |
| UPP1 | IL17A       | READ | -0.160435865 | 0.042049507 |
| UPP1 | IL17B       | READ | 0.4156094    | 4.19E-08    |
| UPP1 | IL17C       | READ | 0.112499935  | 0.155358549 |
| UPP1 | IL17D       | READ | 0.144966548  | 0.066536623 |
| UPP1 | IL17F       | READ | -0.062130264 | 0.433651296 |
| UPP1 | IL18        | READ | 0.236002406  | 0.002579185 |
| UPP1 | IL19        | READ | 0.265443887  | 0.000666209 |
| UPP1 | IL1A        | READ | 0.136417092  | 0.084432419 |
| UPP1 | IL1B        | READ | 0.190714067  | 0.015379373 |
| UPP1 | IL2         | READ | -0.013743415 | 0.862624875 |
| UPP1 | IL20        | READ | 0.226132667  | 0.003921553 |
| UPP1 | IL21        | READ | 0.11052511   | 0.162787035 |
| UPP1 | IL22        | READ | 0.105012097  | 0.184925674 |
| UPP1 | IL24        | READ | 0.253439677  | 0.001179215 |
| UPP1 | IL25        | READ | 0.112267735  | 0.156218528 |
| UPP1 | IL26        | READ | 0.030931752  | 0.696895203 |
| UPP1 | IL27        | READ | 0.216078623  | 0.005905783 |
| UPP1 | IL29        | READ | 0.177608204  | 0.024196997 |
| UPP1 | IL3         | READ | 0.114256945  | 0.148966281 |
| UPP1 | IL31        | READ | 0.114238363  | 0.149032829 |
| UPP1 | IL32        | READ | 0.240379137  | 0.00213009  |
| UPP1 | IL33        | READ | 0.026229976  | 0.741184908 |
| UPP1 | IL34        | READ | 0.155220618  | 0.049285246 |
| UPP1 | IL4         | READ | 0.114161774  | 0.149307351 |
| UPP1 | IL5         | READ | -0.02458035  | 0.756936456 |
| UPP1 | IL6         | READ | 0.194383684  | 0.013479259 |
| UPP1 | IL7         | READ | -0.123058687 | 0.119900778 |
| UPP1 | IL8         | READ | 0.255162607  | 0.001088206 |
| UPP1 | IL9         | READ | 0.11189385   | 0.157610764 |
| UPP1 | TGFB1       | KIRC | 0.122855908  | 0.00446724  |
| UPP1 | TGFB2       | KIRC | -0.146625335 | 0.000676998 |
| UPP1 | TGFB3       | KIRC | 0.098789054  | 0.022424564 |
| UPP1 | VEGFA       | KIRC | -0.213846125 | 6.10E-07    |
| UPP1 | VEGFB       | KIRC | 0.459502458  | 2.99E-29    |
| UPP1 | VEGFC       | KIRC | 0.097921652  | 0.023638475 |
| UPP1 | CCL11       | KIRC | 0.192386471  | 7.56E-06    |
| UPP1 | CCL13       | KIRC | 0.160588797  | 0.000194178 |
| UPP1 | CCL14       | KIRC | 0.077728632  | 0.072702416 |
| UPP1 | CCL14-CCL15 | KIRC | -0.317679628 | 5.50E-14    |
| UPP1 | CCL15       | KIRC | -0.306314685 | 4.60E-13    |
| UPP1 | CCL1        | KIRC | 0.130657191  | 0.002484798 |

|      |         |      |              |             |
|------|---------|------|--------------|-------------|
| UPP1 | CCL16   | KIRC | 0.087652241  | 0.042902467 |
| UPP1 | CCL17   | KIRC | 0.010474558  | 0.809175276 |
| UPP1 | CCL18   | KIRC | 0.068333302  | 0.114744989 |
| UPP1 | CCL19   | KIRC | 0.098545717  | 0.022759531 |
| UPP1 | CCL20   | KIRC | 0.077700944  | 0.072804697 |
| UPP1 | CCL21   | KIRC | 0.253979083  | 2.63E-09    |
| UPP1 | CCL22   | KIRC | -0.125933148 | 0.003557889 |
| UPP1 | CCL23   | KIRC | 0.107396512  | 0.013023146 |
| UPP1 | CCL24   | KIRC | 0.094492062  | 0.029011191 |
| UPP1 | CCL25   | KIRC | 0.225984155  | 1.30E-07    |
| UPP1 | CCL26   | KIRC | 0.303245573  | 8.04E-13    |
| UPP1 | CCL2    | KIRC | -0.060665391 | 0.161547146 |
| UPP1 | CCL27   | KIRC | 0.087111219  | 0.044207979 |
| UPP1 | CCL28   | KIRC | -0.240633723 | 1.80E-08    |
| UPP1 | CCL3    | KIRC | 0.059187698  | 0.172024418 |
| UPP1 | CCL3L1  | KIRC | -0.031765899 | 0.463848133 |
| UPP1 | CCL3L3  | KIRC | -0.067893244 | 0.117105577 |
| UPP1 | CCL4    | KIRC | -0.042931419 | 0.322071525 |
| UPP1 | CCL4L2  | KIRC | -0.046981291 | 0.278489527 |
| UPP1 | CCL5    | KIRC | 0.010061607  | 0.81656204  |
| UPP1 | CCL7    | KIRC | 0.241883473  | 1.51E-08    |
| UPP1 | CCL8    | KIRC | 0.063762785  | 0.141155044 |
| UPP1 | CROCCL1 | KIRC | 0.070510439  | 0.103610943 |
| UPP1 | CROCCL2 | KIRC | -0.086747891 | 0.045103346 |
| UPP1 | CXCL10  | KIRC | -0.14647803  | 0.000685592 |
| UPP1 | CXCL11  | KIRC | -0.179516849 | 3.01E-05    |
| UPP1 | CXCL12  | KIRC | -0.188201728 | 1.20E-05    |
| UPP1 | CXCL1   | KIRC | 0.073383679  | 0.090247567 |
| UPP1 | CXCL13  | KIRC | 0.025237492  | 0.560617111 |
| UPP1 | CXCL14  | KIRC | -0.445660981 | 2.03E-27    |
| UPP1 | CXCL16  | KIRC | -0.12194283  | 0.004774855 |
| UPP1 | CXCL17  | KIRC | 0.203801841  | 2.05E-06    |
| UPP1 | CXCL2   | KIRC | 0.180446617  | 2.73E-05    |
| UPP1 | CXCL3   | KIRC | 0.145409741  | 0.000751008 |
| UPP1 | CXCL5   | KIRC | 0.079742591  | 0.065571479 |
| UPP1 | CXCL6   | KIRC | 0.00340902   | 0.937356539 |
| UPP1 | CXCL9   | KIRC | -0.199360699 | 3.44E-06    |
| UPP1 | IL10    | KIRC | -0.09174613  | 0.034038621 |
| UPP1 | IL11    | KIRC | 0.389585654  | 8.46E-21    |
| UPP1 | IL12A   | KIRC | 0.002572589  | 0.952705749 |
| UPP1 | IL12B   | KIRC | 0.153038558  | 0.000386517 |
| UPP1 | IL13    | KIRC | 0.112373967  | 0.009351255 |
| UPP1 | IL15    | KIRC | 0.044967488  | 0.299634186 |

|      |             |      |              |             |
|------|-------------|------|--------------|-------------|
| UPP1 | IL16        | KIRC | -0.258865729 | 1.27E-09    |
| UPP1 | IL17A       | KIRC | 0.06432759   | 0.137659162 |
| UPP1 | IL17B       | KIRC | 0.237132588  | 2.92E-08    |
| UPP1 | IL17C       | KIRC | 0.181696823  | 2.40E-05    |
| UPP1 | IL17D       | KIRC | 0.31263953   | 1.43E-13    |
| UPP1 | IL17F       | KIRC | -0.031323405 | 0.470100175 |
| UPP1 | IL18        | KIRC | 0.296950982  | 2.48E-12    |
| UPP1 | IL19        | KIRC | 0.23625618   | 3.29E-08    |
| UPP1 | IL1A        | KIRC | 0.180730194  | 2.65E-05    |
| UPP1 | IL1B        | KIRC | -0.047533951 | 0.272868195 |
| UPP1 | IL2         | KIRC | 0.062202357  | 0.151167067 |
| UPP1 | IL20        | KIRC | 0.36271778   | 4.77E-18    |
| UPP1 | IL21        | KIRC | 0.014308655  | 0.741480996 |
| UPP1 | IL22        | KIRC | 0.038675306  | 0.372411464 |
| UPP1 | IL24        | KIRC | -0.026904425 | 0.535011134 |
| UPP1 | IL25        | KIRC | 0.098856542  | 0.022332424 |
| UPP1 | IL26        | KIRC | -0.03220582  | 0.457678497 |
| UPP1 | IL27        | KIRC | 0.162819264  | 0.000157505 |
| UPP1 | IL29        | KIRC | 0.063565874  | 0.142389697 |
| UPP1 | IL3         | KIRC | -0.030059142 | 0.488216181 |
| UPP1 | IL31        | KIRC | 0.07831738   | 0.070555183 |
| UPP1 | IL32        | KIRC | -0.121988968 | 0.004758864 |
| UPP1 | IL33        | KIRC | -0.06849025  | 0.113912169 |
| UPP1 | IL34        | KIRC | 0.061191538  | 0.157934986 |
| UPP1 | IL4         | KIRC | 0.129838163  | 0.002646564 |
| UPP1 | IL5         | KIRC | -0.03286508  | 0.448519355 |
| UPP1 | IL6         | KIRC | 0.237400954  | 2.81E-08    |
| UPP1 | IL7         | KIRC | -0.347810712 | 1.25E-16    |
| UPP1 | IL8         | KIRC | 0.201157631  | 2.79E-06    |
| UPP1 | IL9         | KIRC | -0.074950523 | 0.083564995 |
| UPP1 | TGFB1       | LIHC | 0.354470485  | 1.75E-12    |
| UPP1 | TGFB2       | LIHC | 0.049948527  | 0.336034986 |
| UPP1 | TGFB3       | LIHC | 0.277202127  | 5.25E-08    |
| UPP1 | VEGFA       | LIHC | -0.059617313 | 0.25073793  |
| UPP1 | VEGFB       | LIHC | 0.479844623  | 7.08E-23    |
| UPP1 | VEGFC       | LIHC | 0.112428089  | 0.029935223 |
| UPP1 | CCL11       | LIHC | 0.22157003   | 1.57E-05    |
| UPP1 | CCL13       | LIHC | 0.321138491  | 2.15E-10    |
| UPP1 | CCL14       | LIHC | -0.002876523 | 0.955844857 |
| UPP1 | CCL14-CCL15 | LIHC | -0.266057012 | 1.83E-07    |
| UPP1 | CCL15       | LIHC | -0.141378783 | 0.006236815 |
| UPP1 | CCL1        | LIHC | 0.108273473  | 0.036596422 |
| UPP1 | CCL16       | LIHC | -0.22588499  | 1.06E-05    |

|      |         |      |              |             |
|------|---------|------|--------------|-------------|
| UPP1 | CCL17   | LIHC | 0.329563515  | 6.72E-11    |
| UPP1 | CCL18   | LIHC | 0.041756592  | 0.421340534 |
| UPP1 | CCL19   | LIHC | 0.211605794  | 3.79E-05    |
| UPP1 | CCL20   | LIHC | 0.242635044  | 2.12E-06    |
| UPP1 | CCL21   | LIHC | 0.20012001   | 9.97E-05    |
| UPP1 | CCL22   | LIHC | 0.246612188  | 1.42E-06    |
| UPP1 | CCL23   | LIHC | 0.123317775  | 0.017182951 |
| UPP1 | CCL24   | LIHC | -0.106419299 | 0.039952817 |
| UPP1 | CCL25   | LIHC | 0.031572343  | 0.543274902 |
| UPP1 | CCL26   | LIHC | 0.428232942  | 4.57E-18    |
| UPP1 | CCL2    | LIHC | 0.216039715  | 2.57E-05    |
| UPP1 | CCL27   | LIHC | 0.234244209  | 4.82E-06    |
| UPP1 | CCL28   | LIHC | 0.223417158  | 1.33E-05    |
| UPP1 | CCL3    | LIHC | 0.250995487  | 9.10E-07    |
| UPP1 | CCL3L1  | LIHC | 0.167322224  | 0.001180383 |
| UPP1 | CCL3L3  | LIHC | -0.02951529  | 0.569868282 |
| UPP1 | CCL4    | LIHC | 0.236991313  | 3.70E-06    |
| UPP1 | CCL4L2  | LIHC | 0.169919364  | 0.000985396 |
| UPP1 | CCL5    | LIHC | 0.293912724  | 7.22E-09    |
| UPP1 | CCL7    | LIHC | 0.232266038  | 5.82E-06    |
| UPP1 | CCL8    | LIHC | 0.021990879  | 0.672047127 |
| UPP1 | CROCCL1 | LIHC | -0.150195166 | 0.003643015 |
| UPP1 | CROCCL2 | LIHC | -0.083513252 | 0.107330331 |
| UPP1 | CXCL10  | LIHC | -0.058920116 | 0.256331968 |
| UPP1 | CXCL11  | LIHC | -0.000662603 | 0.989824026 |
| UPP1 | CXCL12  | LIHC | 0.06189181   | 0.233080571 |
| UPP1 | CXCL1   | LIHC | 0.387940502  | 7.62E-15    |
| UPP1 | CXCL13  | LIHC | 0.162172856  | 0.001675733 |
| UPP1 | CXCL14  | LIHC | 0.215105432  | 2.79E-05    |
| UPP1 | CXCL16  | LIHC | 0.288855491  | 1.33E-08    |
| UPP1 | CXCL17  | LIHC | 0.126665629  | 0.014366108 |
| UPP1 | CXCL2   | LIHC | 0.172230862  | 0.000837303 |
| UPP1 | CXCL3   | LIHC | 0.268529016  | 1.40E-07    |
| UPP1 | CXCL5   | LIHC | 0.257957851  | 4.39E-07    |
| UPP1 | CXCL6   | LIHC | 0.276396019  | 5.76E-08    |
| UPP1 | CXCL9   | LIHC | 0.003804189  | 0.94162726  |
| UPP1 | IL10    | LIHC | 0.172779466  | 0.000805315 |
| UPP1 | IL11    | LIHC | 0.369647429  | 1.61E-13    |
| UPP1 | IL12A   | LIHC | 0.175707308  | 0.000652881 |
| UPP1 | IL12B   | LIHC | 0.087217665  | 0.092567716 |
| UPP1 | IL13    | LIHC | -0.034775669 | 0.503126816 |
| UPP1 | IL15    | LIHC | 0.353054676  | 2.17E-12    |
| UPP1 | IL16    | LIHC | 0.090487156  | 0.080930289 |

|      |             |      |              |             |
|------|-------------|------|--------------|-------------|
| UPP1 | IL17A       | LIHC | -0.174898774 | 0.00069206  |
| UPP1 | IL17B       | LIHC | 0.361779169  | 5.62E-13    |
| UPP1 | IL17C       | LIHC | 0.078431233  | 0.130532702 |
| UPP1 | IL17D       | LIHC | 0.325492067  | 1.18E-10    |
| UPP1 | IL17F       | LIHC | -0.073991957 | 0.153816019 |
| UPP1 | IL18        | LIHC | 0.424231724  | 9.99E-18    |
| UPP1 | IL19        | LIHC | 0.116666481  | 0.024237633 |
| UPP1 | IL1A        | LIHC | 0.140642132  | 0.00651499  |
| UPP1 | IL1B        | LIHC | 0.183696939  | 0.000362107 |
| UPP1 | IL2         | LIHC | 0.101718115  | 0.049645753 |
| UPP1 | IL20        | LIHC | 0.079652744  | 0.124629765 |
| UPP1 | IL21        | LIHC | -0.05544943  | 0.285460097 |
| UPP1 | IL22        | LIHC | 0.068603219  | 0.186148435 |
| UPP1 | IL24        | LIHC | 0.133535363  | 0.009825432 |
| UPP1 | IL25        | LIHC | 0.065770011  | 0.205034072 |
| UPP1 | IL26        | LIHC | 0.114935887  | 0.026439749 |
| UPP1 | IL27        | LIHC | -0.243587557 | 1.93E-06    |
| UPP1 | IL29        | LIHC | 0.027264325  | 0.599658392 |
| UPP1 | IL3         | LIHC | -0.131673386 | 0.01090924  |
| UPP1 | IL31        | LIHC | -0.00316874  | 0.951364567 |
| UPP1 | IL32        | LIHC | 0.268930923  | 1.34E-07    |
| UPP1 | IL33        | LIHC | -0.058783258 | 0.257440121 |
| UPP1 | IL34        | LIHC | 0.344521415  | 7.81E-12    |
| UPP1 | IL4         | LIHC | 0.125327479  | 0.015439262 |
| UPP1 | IL5         | LIHC | -0.097907432 | 0.058878313 |
| UPP1 | IL6         | LIHC | 0.177759485  | 0.000562477 |
| UPP1 | IL7         | LIHC | -0.120375144 | 0.02004582  |
| UPP1 | IL8         | LIHC | 0.249528985  | 1.06E-06    |
| UPP1 | IL9         | LIHC | 0.065274441  | 0.208475193 |
| UPP1 | TGFB1       | BRCA | 0.36726752   | 2.30E-36    |
| UPP1 | TGFB2       | BRCA | 0.128839493  | 1.87E-05    |
| UPP1 | TGFB3       | BRCA | -0.166454586 | 2.93E-08    |
| UPP1 | VEGFA       | BRCA | 0.268097912  | 1.63E-19    |
| UPP1 | VEGFB       | BRCA | 0.321171975  | 9.68E-28    |
| UPP1 | VEGFC       | BRCA | 0.204845143  | 7.40E-12    |
| UPP1 | CCL11       | BRCA | 0.25001545   | 4.27E-17    |
| UPP1 | CCL13       | BRCA | 0.478609933  | 6.95E-64    |
| UPP1 | CCL14       | BRCA | -0.000433313 | 0.988562394 |
| UPP1 | CCL14-CCL15 | BRCA | -0.011713661 | 0.698357187 |
| UPP1 | CCL15       | BRCA | -0.040211353 | 0.183235172 |
| UPP1 | CCL1        | BRCA | 0.181118459  | 1.52E-09    |
| UPP1 | CCL16       | BRCA | 0.060300571  | 0.045851818 |
| UPP1 | CCL17       | BRCA | 0.358762897  | 1.16E-34    |

|      |         |      |              |             |
|------|---------|------|--------------|-------------|
| UPP1 | CCL18   | BRCA | 0.463355393  | 1.77E-59    |
| UPP1 | CCL19   | BRCA | 0.190398703  | 2.05E-10    |
| UPP1 | CCL20   | BRCA | 0.42760139   | 5.45E-50    |
| UPP1 | CCL21   | BRCA | 0.162844187  | 5.84E-08    |
| UPP1 | CCL22   | BRCA | 0.256157656  | 6.77E-18    |
| UPP1 | CCL23   | BRCA | 0.395700165  | 1.96E-42    |
| UPP1 | CCL24   | BRCA | 0.30481616   | 5.09E-25    |
| UPP1 | CCL25   | BRCA | 0.295205442  | 1.69E-23    |
| UPP1 | CCL26   | BRCA | 0.445079164  | 1.73E-54    |
| UPP1 | CCL2    | BRCA | 0.440505831  | 2.76E-53    |
| UPP1 | CCL27   | BRCA | 0.171208367  | 1.15E-08    |
| UPP1 | CCL28   | BRCA | 0.014780425  | 0.624833965 |
| UPP1 | CCL3    | BRCA | 0.407550777  | 3.81E-45    |
| UPP1 | CCL3L1  | BRCA | 0.215733925  | 5.11E-13    |
| UPP1 | CCL3L3  | BRCA | 0.016423772  | 0.586862623 |
| UPP1 | CCL4    | BRCA | 0.418978263  | 7.25E-48    |
| UPP1 | CCL4L2  | BRCA | 0.331266381  | 1.66E-29    |
| UPP1 | CCL5    | BRCA | 0.436967942  | 2.29E-52    |
| UPP1 | CCL7    | BRCA | 0.464400015  | 8.97E-60    |
| UPP1 | CCL8    | BRCA | 0.393361771  | 6.52E-42    |
| UPP1 | CROCCL1 | BRCA | 0.178805779  | 2.47E-09    |
| UPP1 | CROCCL2 | BRCA | -0.114444695 | 0.000145464 |
| UPP1 | CXCL10  | BRCA | 0.345246215  | 4.60E-32    |
| UPP1 | CXCL11  | BRCA | 0.299998313  | 3.00E-24    |
| UPP1 | CXCL12  | BRCA | 0.055065595  | 0.068283538 |
| UPP1 | CXCL1   | BRCA | 0.509224748  | 2.00E-73    |
| UPP1 | CXCL13  | BRCA | 0.246738095  | 1.12E-16    |
| UPP1 | CXCL14  | BRCA | -0.117369432 | 9.76E-05    |
| UPP1 | CXCL16  | BRCA | 0.4679962    | 8.53E-61    |
| UPP1 | CXCL17  | BRCA | 0.050091008  | 0.097274411 |
| UPP1 | CXCL2   | BRCA | 0.399487844  | 2.74E-43    |
| UPP1 | CXCL3   | BRCA | 0.486263296  | 3.52E-66    |
| UPP1 | CXCL5   | BRCA | 0.451407991  | 3.51E-56    |
| UPP1 | CXCL6   | BRCA | 0.360870593  | 4.43E-35    |
| UPP1 | CXCL9   | BRCA | 0.217661155  | 3.13E-13    |
| UPP1 | IL10    | BRCA | 0.355673074  | 4.67E-34    |
| UPP1 | IL11    | BRCA | 0.393013783  | 7.79E-42    |
| UPP1 | IL12A   | BRCA | 0.324000974  | 3.14E-28    |
| UPP1 | IL12B   | BRCA | 0.219065818  | 2.19E-13    |
| UPP1 | IL13    | BRCA | 0.292219744  | 4.88E-23    |
| UPP1 | IL15    | BRCA | 0.399721199  | 2.42E-43    |
| UPP1 | IL16    | BRCA | 0.171972189  | 9.92E-09    |
| UPP1 | IL17A   | BRCA | 0.157685804  | 1.52E-07    |

|      |             |      |              |             |
|------|-------------|------|--------------|-------------|
| UPP1 | IL17B       | BRCA | 0.167423432  | 2.43E-08    |
| UPP1 | IL17C       | BRCA | 0.162517674  | 6.21E-08    |
| UPP1 | IL17D       | BRCA | 0.159868182  | 1.02E-07    |
| UPP1 | IL17F       | BRCA | 0.179872482  | 1.98E-09    |
| UPP1 | IL18        | BRCA | 0.348240552  | 1.25E-32    |
| UPP1 | IL19        | BRCA | -0.138297165 | 4.28E-06    |
| UPP1 | IL1A        | BRCA | 0.356993565  | 2.58E-34    |
| UPP1 | IL1B        | BRCA | 0.285651144  | 4.82E-22    |
| UPP1 | IL2         | BRCA | 0.171083715  | 1.18E-08    |
| UPP1 | IL20        | BRCA | -0.248016929 | 7.70E-17    |
| UPP1 | IL21        | BRCA | 0.110495405  | 0.000245626 |
| UPP1 | IL22        | BRCA | 0.168870905  | 1.83E-08    |
| UPP1 | IL24        | BRCA | -0.024062086 | 0.425935083 |
| UPP1 | IL25        | BRCA | -0.013141023 | 0.663732096 |
| UPP1 | IL26        | BRCA | 0.274437796  | 2.09E-20    |
| UPP1 | IL27        | BRCA | 0.312563976  | 2.75E-26    |
| UPP1 | IL29        | BRCA | 0.259670304  | 2.31E-18    |
| UPP1 | IL3         | BRCA | 0.074906487  | 0.013078093 |
| UPP1 | IL31        | BRCA | -0.017148972 | 0.570452572 |
| UPP1 | IL32        | BRCA | 0.558233628  | 6.98E-91    |
| UPP1 | IL33        | BRCA | 0.027033725  | 0.371040289 |
| UPP1 | IL34        | BRCA | 0.486941265  | 2.19E-66    |
| UPP1 | IL4         | BRCA | 0.068424941  | 0.023428453 |
| UPP1 | IL5         | BRCA | 0.089559513  | 0.002988817 |
| UPP1 | IL6         | BRCA | 0.398577702  | 4.40E-43    |
| UPP1 | IL7         | BRCA | 0.262161167  | 1.07E-18    |
| UPP1 | IL8         | BRCA | 0.411223913  | 5.22E-46    |
| UPP1 | IL9         | BRCA | -0.051302082 | 0.089440404 |
| UPP1 | TGFB1       | OV   | 0.401898883  | 2.20E-13    |
| UPP1 | TGFB2       | OV   | -0.32087126  | 8.34E-09    |
| UPP1 | TGFB3       | OV   | -0.018827207 | 0.742078716 |
| UPP1 | VEGFA       | OV   | 0.045159415  | 0.429688404 |
| UPP1 | VEGFB       | OV   | 0.289018774  | 2.44E-07    |
| UPP1 | VEGFC       | OV   | -0.107162879 | 0.060317368 |
| UPP1 | CCL11       | OV   | 0.450705796  | 8.15E-17    |
| UPP1 | CCL13       | OV   | 0.372475763  | 1.43E-11    |
| UPP1 | CCL14       | OV   | 0.087089802  | 0.127233098 |
| UPP1 | CCL14-CCL15 | OV   | 0.114914212  | 0.043881959 |
| UPP1 | CCL15       | OV   | 0.021127673  | 0.711887177 |
| UPP1 | CCL1        | OV   | 0.203883995  | 0.000316383 |
| UPP1 | CCL16       | OV   | 0.010148     | 0.859212196 |
| UPP1 | CCL17       | OV   | 0.305130734  | 4.65E-08    |
| UPP1 | CCL18       | OV   | 0.30797757   | 3.43E-08    |

|      |         |    |              |             |
|------|---------|----|--------------|-------------|
| UPP1 | CCL19   | OV | 0.265043174  | 2.39E-06    |
| UPP1 | CCL20   | OV | 0.271592762  | 1.31E-06    |
| UPP1 | CCL21   | OV | 0.140469079  | 0.013608135 |
| UPP1 | CCL22   | OV | 0.31058359   | 2.59E-08    |
| UPP1 | CCL23   | OV | 0.335288132  | 1.58E-09    |
| UPP1 | CCL24   | OV | 0.313550976  | 1.88E-08    |
| UPP1 | CCL25   | OV | 0.023846812  | 0.67677535  |
| UPP1 | CCL26   | OV | 0.34799336   | 3.39E-10    |
| UPP1 | CCL2    | OV | 0.504160754  | 2.92E-21    |
| UPP1 | CCL27   | OV | 0.023380588  | 0.682748734 |
| UPP1 | CCL28   | OV | 0.105840988  | 0.063572933 |
| UPP1 | CCL3    | OV | 0.474267956  | 1.11E-18    |
| UPP1 | CCL3L1  | OV | 0.315570252  | 1.50E-08    |
| UPP1 | CCL3L3  | OV | 0.129808325  | 0.022696063 |
| UPP1 | CCL4    | OV | 0.542590282  | 5.62E-25    |
| UPP1 | CCL4L2  | OV | 0.423394715  | 7.92E-15    |
| UPP1 | CCL5    | OV | 0.459329678  | 1.76E-17    |
| UPP1 | CCL7    | OV | 0.370262496  | 1.92E-11    |
| UPP1 | CCL8    | OV | 0.439929112  | 5.21E-16    |
| UPP1 | CROCCL1 | OV | -0.300658931 | 7.45E-08    |
| UPP1 | CROCCL2 | OV | -0.366807004 | 3.05E-11    |
| UPP1 | CXCL10  | OV | 0.353016109  | 1.81E-10    |
| UPP1 | CXCL11  | OV | 0.289482913  | 2.33E-07    |
| UPP1 | CXCL12  | OV | 0.222401868  | 8.26E-05    |
| UPP1 | CXCL1   | OV | 0.454675134  | 4.05E-17    |
| UPP1 | CXCL13  | OV | 0.362420469  | 5.42E-11    |
| UPP1 | CXCL14  | OV | 0.21937009   | 0.000103746 |
| UPP1 | CXCL16  | OV | 0.188422879  | 0.000889982 |
| UPP1 | CXCL17  | OV | 0.322264698  | 7.13E-09    |
| UPP1 | CXCL2   | OV | 0.245994967  | 1.26E-05    |
| UPP1 | CXCL3   | OV | 0.298268513  | 9.54E-08    |
| UPP1 | CXCL5   | OV | 0.197506691  | 0.000489311 |
| UPP1 | CXCL6   | OV | 0.310194693  | 2.71E-08    |
| UPP1 | CXCL9   | OV | 0.375019992  | 1.01E-11    |
| UPP1 | IL10    | OV | 0.452027054  | 6.46E-17    |
| UPP1 | IL11    | OV | 0.063257266  | 0.268399735 |
| UPP1 | IL12A   | OV | 0.311569587  | 2.33E-08    |
| UPP1 | IL12B   | OV | 0.247253233  | 1.13E-05    |
| UPP1 | IL13    | OV | 0.183953032  | 0.001182975 |
| UPP1 | IL15    | OV | 0.422080507  | 9.78E-15    |
| UPP1 | IL16    | OV | 0.245715342  | 1.29E-05    |
| UPP1 | IL17A   | OV | 0.103724157  | 0.069086121 |
| UPP1 | IL17B   | OV | -0.028164561 | 0.62245501  |



|      |             |     |              |             |
|------|-------------|-----|--------------|-------------|
| UPP1 | IL17C       | OV  | 0.297995694  | 9.81E-08    |
| UPP1 | IL17D       | OV  | 0.005015055  | 0.930149661 |
| UPP1 | IL17F       | OV  | -0.030650013 | 0.592066152 |
| UPP1 | IL18        | OV  | 0.311467258  | 2.36E-08    |
| UPP1 | IL19        | OV  | 0.203386174  | 0.000327495 |
| UPP1 | IL1A        | OV  | 0.241835627  | 1.78E-05    |
| UPP1 | IL1B        | OV  | 0.431354785  | 2.18E-15    |
| UPP1 | IL2         | OV  | 0.14641516   | 0.010081879 |
| UPP1 | IL20        | OV  | 0.185186545  | 0.001094323 |
| UPP1 | IL21        | OV  | 0.123042836  | 0.030863953 |
| UPP1 | IL22        | OV  | 0.051481032  | 0.367901015 |
| UPP1 | IL24        | OV  | 0.22574309   | 6.40E-05    |
| UPP1 | IL25        | OV  | -0.198322796 | 0.000463099 |
| UPP1 | IL26        | OV  | 0.106965596  | 0.060794324 |
| UPP1 | IL27        | OV  | 0.319119501  | 1.01E-08    |
| UPP1 | IL29        | OV  | 0.163549203  | 0.004001933 |
| UPP1 | IL3         | OV  | 0.005162754  | 0.928097968 |
| UPP1 | IL31        | OV  | -0.030568171 | 0.593055948 |
| UPP1 | IL32        | OV  | 0.307754087  | 3.52E-08    |
| UPP1 | IL33        | OV  | 0.107005334  | 0.060698003 |
| UPP1 | IL34        | OV  | 0.023807987  | 0.677272026 |
| UPP1 | IL4         | OV  | -0.111529473 | 0.050526377 |
| UPP1 | IL5         | OV  | -0.216843834 | 0.000125126 |
| UPP1 | IL6         | OV  | 0.322631693  | 6.84E-09    |
| UPP1 | IL7         | OV  | 0.361157055  | 6.39E-11    |
| UPP1 | IL8         | OV  | 0.410260246  | 6.21E-14    |
| UPP1 | IL9         | OV  | -0.045674906 | 0.42443597  |
| UPP1 | TGFB1       | UCS | 0.315147384  | 0.016949911 |
| UPP1 | TGFB2       | UCS | -0.240560323 | 0.071462819 |
| UPP1 | TGFB3       | UCS | -0.24864234  | 0.062177681 |
| UPP1 | VEGFA       | UCS | 0.219511453  | 0.100872715 |
| UPP1 | VEGFB       | UCS | 0.131827706  | 0.328320693 |
| UPP1 | VEGFC       | UCS | -0.029545741 | 0.827295798 |
| UPP1 | CCL11       | UCS | -0.223238676 | 0.095075016 |
| UPP1 | CCL13       | UCS | 0.407610397  | 0.001648939 |
| UPP1 | CCL14       | UCS | 0.032591512  | 0.809808535 |
| UPP1 | CCL14-CCL15 | UCS | 0.158855129  | 0.237892193 |
| UPP1 | CCL15       | UCS | 0.11879813   | 0.378773615 |
| UPP1 | CCL1        | UCS | 0.112453329  | 0.404934405 |
| UPP1 | CCL16       | UCS | 0.122935937  | 0.362271367 |
| UPP1 | CCL17       | UCS | 0.281905097  | 0.033630049 |
| UPP1 | CCL18       | UCS | 0.384388388  | 0.003156159 |
| UPP1 | CCL19       | UCS | 0.09735077   | 0.471270874 |

|      |         |     |              |             |
|------|---------|-----|--------------|-------------|
| UPP1 | CCL20   | UCS | 0.170389668  | 0.20508237  |
| UPP1 | CCL21   | UCS | 0.083155621  | 0.538575316 |
| UPP1 | CCL22   | UCS | 0.465941309  | 0.000259522 |
| UPP1 | CCL23   | UCS | 0.318470263  | 0.015762943 |
| UPP1 | CCL24   | UCS | 0.129521875  | 0.336925751 |
| UPP1 | CCL25   | UCS | 0.137709155  | 0.307005987 |
| UPP1 | CCL26   | UCS | 0.029823722  | 0.82569618  |
| UPP1 | CCL2    | UCS | 0.241072924  | 0.070842856 |
| UPP1 | CCL27   | UCS | 0.13743836   | 0.307967332 |
| UPP1 | CCL28   | UCS | 0.119727328  | 0.375029203 |
| UPP1 | CCL3    | UCS | 0.32381093   | 0.014004183 |
| UPP1 | CCL3L1  | UCS | 0.216208781  | 0.106235601 |
| UPP1 | CCL3L3  | UCS | 0.06350248   | 0.638865443 |
| UPP1 | CCL4    | UCS | 0.318275036  | 0.015830659 |
| UPP1 | CCL4L2  | UCS | 0.259328904  | 0.051417153 |
| UPP1 | CCL5    | UCS | 0.372871688  | 0.004282682 |
| UPP1 | CCL7    | UCS | 0.175423105  | 0.191817471 |
| UPP1 | CCL8    | UCS | 0.333258728  | 0.011303463 |
| UPP1 | CROCCL1 | UCS | -0.134598929 | 0.318164015 |
| UPP1 | CROCCL2 | UCS | -0.241553242 | 0.070265835 |
| UPP1 | CXCL10  | UCS | 0.378052056  | 0.00373827  |
| UPP1 | CXCL11  | UCS | 0.313412582  | 0.01759934  |
| UPP1 | CXCL12  | UCS | -0.280598262 | 0.034496958 |
| UPP1 | CXCL1   | UCS | 0.471226967  | 0.000215817 |
| UPP1 | CXCL13  | UCS | 0.173262603  | 0.19743394  |
| UPP1 | CXCL14  | UCS | 0.120608854  | 0.37149754  |
| UPP1 | CXCL16  | UCS | 0.624250118  | 2.12E-07    |
| UPP1 | CXCL17  | UCS | 0.225885843  | 0.091117454 |
| UPP1 | CXCL2   | UCS | 0.425451042  | 0.000969582 |
| UPP1 | CXCL3   | UCS | 0.421324103  | 0.001099141 |
| UPP1 | CXCL5   | UCS | 0.350853494  | 0.007454085 |
| UPP1 | CXCL6   | UCS | 0.198710195  | 0.138389891 |
| UPP1 | CXCL9   | UCS | 0.192391697  | 0.151635379 |
| UPP1 | IL10    | UCS | 0.388870714  | 0.002794384 |
| UPP1 | IL11    | UCS | 0.19561085   | 0.144774391 |
| UPP1 | IL12A   | UCS | -0.156127651 | 0.246149756 |
| UPP1 | IL12B   | UCS | 0.070682348  | 0.601341964 |
| UPP1 | IL13    | UCS | 0.072187681  | 0.593599145 |
| UPP1 | IL15    | UCS | 0.348411194  | 0.007908453 |
| UPP1 | IL16    | UCS | 0.198537522  | 0.138739945 |
| UPP1 | IL17A   | UCS | 0.249186796  | 0.061588843 |
| UPP1 | IL17B   | UCS | -0.512665423 | 4.56E-05    |
| UPP1 | IL17C   | UCS | 0.219812445  | 0.100394588 |

|      |             |     |              |             |
|------|-------------|-----|--------------|-------------|
| UPP1 | IL17D       | UCS | -0.445743224 | 0.000511161 |
| UPP1 | IL17F       | UCS | 0.248838311  | 0.061965215 |
| UPP1 | IL18        | UCS | 0.470877731  | 0.000218482 |
| UPP1 | IL19        | UCS | 0.272689961  | 0.040147884 |
| UPP1 | IL1A        | UCS | 0.243886998  | 0.067515387 |
| UPP1 | IL1B        | UCS | 0.420598039  | 0.001123481 |
| UPP1 | IL2         | UCS | -0.028764966 | 0.831792412 |
| UPP1 | IL20        | UCS | 0.148012351  | 0.271865283 |
| UPP1 | IL21        | UCS | 0.237452947  | 0.075314109 |
| UPP1 | IL22        | UCS | 0.006767229  | 0.960154189 |
| UPP1 | IL24        | UCS | 0.182714271  | 0.173708333 |
| UPP1 | IL25        | UCS | -0.09712882  | 0.47228727  |
| UPP1 | IL26        | UCS | 0.108755021  | 0.420655647 |
| UPP1 | IL27        | UCS | 0.400790554  | 0.002004918 |
| UPP1 | IL29        | UCS | 0.080798431  | 0.550188079 |
| UPP1 | IL3         | UCS | -0.103073239 | 0.445474731 |
| UPP1 | IL31        | UCS | -0.330625894 | 0.012006607 |
| UPP1 | IL32        | UCS | -0.047076959 | 0.728034035 |
| UPP1 | IL33        | UCS | 0.098009225  | 0.468262471 |
| UPP1 | IL34        | UCS | -0.010496696 | 0.938230009 |
| UPP1 | IL4         | UCS | -0.039469008 | 0.770671746 |
| UPP1 | IL5         | UCS | -0.063713026 | 0.637751567 |
| UPP1 | IL6         | UCS | 0.212163008  | 0.113101627 |
| UPP1 | IL7         | UCS | 0.275793971  | 0.037845056 |
| UPP1 | IL8         | UCS | 0.447335848  | 0.000485289 |
| UPP1 | IL9         | UCS | -0.186048302 | 0.165854856 |
| UPP1 | TGFB1       | GBM | 0.518875483  | 6.80E-13    |
| UPP1 | TGFB2       | GBM | 0.107420599  | 0.167046906 |
| UPP1 | TGFB3       | GBM | 0.145051369  | 0.061441964 |
| UPP1 | VEGFA       | GBM | 0.192512907  | 0.012685114 |
| UPP1 | VEGFB       | GBM | 0.342022468  | 6.07E-06    |
| UPP1 | VEGFC       | GBM | 0.330761999  | 1.27E-05    |
| UPP1 | CCL11       | GBM | 0.118799725  | 0.12623467  |
| UPP1 | CCL13       | GBM | 0.394934289  | 1.28E-07    |
| UPP1 | CCL14       | GBM | 0.136357987  | 0.078898236 |
| UPP1 | CCL14-CCL15 | GBM | 0.078775819  | 0.311568998 |
| UPP1 | CCL15       | GBM | 0.222860323  | 0.003793318 |
| UPP1 | CCL1        | GBM | 0.093501523  | 0.229415709 |
| UPP1 | CCL16       | GBM | -0.114426004 | 0.140900993 |
| UPP1 | CCL17       | GBM | 0.270492124  | 0.00040714  |
| UPP1 | CCL18       | GBM | 0.331951067  | 1.17E-05    |
| UPP1 | CCL19       | GBM | 0.097700892  | 0.209080424 |
| UPP1 | CCL20       | GBM | 0.488115552  | 2.21E-11    |

|      |         |     |              |             |
|------|---------|-----|--------------|-------------|
| UPP1 | CCL21   | GBM | 0.005480165  | 0.943964476 |
| UPP1 | CCL22   | GBM | 0.192306557  | 0.012782698 |
| UPP1 | CCL23   | GBM | 0.274867288  | 0.000324536 |
| UPP1 | CCL24   | GBM | 0.013356045  | 0.863980485 |
| UPP1 | CCL25   | GBM | -0.092801386 | 0.232937293 |
| UPP1 | CCL26   | GBM | 0.509408353  | 2.06E-12    |
| UPP1 | CCL2    | GBM | 0.604425645  | 5.21E-18    |
| UPP1 | CCL27   | GBM | 0.092902192  | 0.232427925 |
| UPP1 | CCL28   | GBM | 0.101342036  | 0.192523953 |
| UPP1 | CCL3    | GBM | 0.180723555  | 0.019428784 |
| UPP1 | CCL3L1  | GBM | 0.155276631  | 0.045100631 |
| UPP1 | CCL3L3  | GBM | 0.029545812  | 0.704664835 |
| UPP1 | CCL4    | GBM | 0.176145169  | 0.022784191 |
| UPP1 | CCL4L2  | GBM | 0.092535776  | 0.234283165 |
| UPP1 | CCL5    | GBM | 0.475801817  | 8.13E-11    |
| UPP1 | CCL7    | GBM | 0.513704994  | 1.25E-12    |
| UPP1 | CCL8    | GBM | 0.419414846  | 1.68E-08    |
| UPP1 | CROCCL1 | GBM | -0.330320495 | 1.30E-05    |
| UPP1 | CROCCL2 | GBM | -0.340563346 | 6.69E-06    |
| UPP1 | CXCL10  | GBM | 0.228003906  | 0.003041975 |
| UPP1 | CXCL11  | GBM | 0.163529894  | 0.034717723 |
| UPP1 | CXCL12  | GBM | 0.114859839  | 0.139390671 |
| UPP1 | CXCL1   | GBM | 0.447292278  | 1.36E-09    |
| UPP1 | CXCL13  | GBM | 0.342801883  | 5.76E-06    |
| UPP1 | CXCL14  | GBM | 0.428613558  | 7.53E-09    |
| UPP1 | CXCL16  | GBM | 0.453517253  | 7.52E-10    |
| UPP1 | CXCL17  | GBM | 0.038162725  | 0.624384884 |
| UPP1 | CXCL2   | GBM | 0.473053475  | 1.08E-10    |
| UPP1 | CXCL3   | GBM | 0.520649924  | 5.50E-13    |
| UPP1 | CXCL5   | GBM | 0.484826156  | 3.15E-11    |
| UPP1 | CXCL6   | GBM | 0.481356411  | 4.55E-11    |
| UPP1 | CXCL9   | GBM | 0.15788002   | 0.0415766   |
| UPP1 | IL10    | GBM | 0.514798695  | 1.10E-12    |
| UPP1 | IL11    | GBM | 0.442665665  | 2.10E-09    |
| UPP1 | IL12A   | GBM | -0.120319654 | 0.121423498 |
| UPP1 | IL12B   | GBM | 0.00253937   | 0.974017921 |
| UPP1 | IL13    | GBM | -0.132401679 | 0.08806897  |
| UPP1 | IL15    | GBM | 0.573941181  | 5.14E-16    |
| UPP1 | IL16    | GBM | 0.375539553  | 5.71E-07    |
| UPP1 | IL17A   | GBM | 0.042400807  | 0.586394393 |
| UPP1 | IL17B   | GBM | 0.159818771  | 0.03910491  |
| UPP1 | IL17C   | GBM | -0.088375022 | 0.256081001 |
| UPP1 | IL17D   | GBM | -0.228109612 | 0.003028055 |

|      |             |      |              |             |
|------|-------------|------|--------------|-------------|
| UPP1 | IL17F       | GBM  | -0.020878413 | 0.788844617 |
| UPP1 | IL18        | GBM  | 0.489676396  | 1.87E-11    |
| UPP1 | IL19        | GBM  | 0.246204709  | 0.001339938 |
| UPP1 | IL1A        | GBM  | 0.491470912  | 1.54E-11    |
| UPP1 | IL1B        | GBM  | 0.397083871  | 1.08E-07    |
| UPP1 | IL2         | GBM  | 0.009412121  | 0.903912409 |
| UPP1 | IL20        | GBM  | 0.226377187  | 0.003263606 |
| UPP1 | IL21        | GBM  | 0.014216721  | 0.855308198 |
| UPP1 | IL22        | GBM  | 0.081971945  | 0.292282327 |
| UPP1 | IL24        | GBM  | 0.280877029  | 0.00023621  |
| UPP1 | IL25        | GBM  | -0.010226839 | 0.895640297 |
| UPP1 | IL26        | GBM  | -0.024975965 | 0.748675466 |
| UPP1 | IL27        | GBM  | 0.233972879  | 0.002340442 |
| UPP1 | IL29        | GBM  | -0.064836957 | 0.405148628 |
| UPP1 | IL3         | GBM  | -0.034592545 | 0.657180369 |
| UPP1 | IL31        | GBM  | 0.082693053  | 0.288043186 |
| UPP1 | IL32        | GBM  | 0.439908531  | 2.71E-09    |
| UPP1 | IL33        | GBM  | 0.093834854  | 0.227752363 |
| UPP1 | IL34        | GBM  | 0.102482933  | 0.187538174 |
| UPP1 | IL4         | GBM  | 0.068385122  | 0.379877821 |
| UPP1 | IL5         | GBM  | -0.080184196 | 0.302970132 |
| UPP1 | IL6         | GBM  | 0.495884779  | 9.49E-12    |
| UPP1 | IL7         | GBM  | 0.354310163  | 2.63E-06    |
| UPP1 | IL8         | GBM  | 0.458583294  | 4.60E-10    |
| UPP1 | IL9         | GBM  | -0.269485211 | 0.000428722 |
| UPP1 | TGFB1       | KICH | 0.205458343  | 0.097931092 |
| UPP1 | TGFB2       | KICH | 0.242091486  | 0.0501806   |
| UPP1 | TGFB3       | KICH | 0.11342051   | 0.364534899 |
| UPP1 | VEGFA       | KICH | 0.074221733  | 0.553665026 |
| UPP1 | VEGFB       | KICH | 0.420214503  | 0.000443518 |
| UPP1 | VEGFC       | KICH | 0.28308814   | 0.02126705  |
| UPP1 | CCL11       | KICH | -0.291372391 | 0.017613409 |
| UPP1 | CCL13       | KICH | -0.148561851 | 0.233857151 |
| UPP1 | CCL14       | KICH | -0.096218305 | 0.442171464 |
| UPP1 | CCL14-CCL15 | KICH | 0.093512172  | 0.455172271 |
| UPP1 | CCL15       | KICH | 0.139970709  | 0.262317874 |
| UPP1 | CCL1        | KICH | 0.131817803  | 0.291405248 |
| UPP1 | CCL16       | KICH | -0.047762246 | 0.703332373 |
| UPP1 | CCL17       | KICH | 0.224640158  | 0.069774948 |
| UPP1 | CCL18       | KICH | 0.114554606  | 0.359727523 |
| UPP1 | CCL19       | KICH | -0.166661824 | 0.181068322 |
| UPP1 | CCL20       | KICH | -0.002886188 | 0.981650641 |
| UPP1 | CCL21       | KICH | 0.212003041  | 0.087469921 |

|      |         |      |              |             |
|------|---------|------|--------------|-------------|
| UPP1 | CCL22   | KICH | -0.02016831  | 0.872303031 |
| UPP1 | CCL23   | KICH | -0.076634142 | 0.540813203 |
| UPP1 | CCL24   | KICH | 0.08945882   | 0.475032475 |
| UPP1 | CCL25   | KICH | 0.37795319   | 0.00175537  |
| UPP1 | CCL26   | KICH | 0.047541693  | 0.704639269 |
| UPP1 | CCL2    | KICH | -0.230380961 | 0.06274671  |
| UPP1 | CCL27   | KICH | 0.017107058  | 0.891558101 |
| UPP1 | CCL28   | KICH | -0.305280287 | 0.012683465 |
| UPP1 | CCL3    | KICH | 0.070726115  | 0.57254264  |
| UPP1 | CCL3L1  | KICH | 0.026752484  | 0.83115246  |
| UPP1 | CCL3L3  | KICH | 0.021173985  | 0.865992934 |
| UPP1 | CCL4    | KICH | -0.016422692 | 0.895871674 |
| UPP1 | CCL4L2  | KICH | -0.035615093 | 0.776486887 |
| UPP1 | CCL5    | KICH | 0.111020647  | 0.374836258 |
| UPP1 | CCL7    | KICH | 0.020793643  | 0.86837843  |
| UPP1 | CCL8    | KICH | -0.084569662 | 0.499592536 |
| UPP1 | CROCCL1 | KICH | 0.08211757   | 0.512153505 |
| UPP1 | CROCCL2 | KICH | 0.028076919  | 0.822925486 |
| UPP1 | CXCL10  | KICH | 0.026829472  | 0.830673727 |
| UPP1 | CXCL11  | KICH | -0.001367939 | 0.991302552 |
| UPP1 | CXCL12  | KICH | -0.117637721 | 0.346856084 |
| UPP1 | CXCL1   | KICH | -0.116730043 | 0.350615389 |
| UPP1 | CXCL13  | KICH | 0.083438978  | 0.505364603 |
| UPP1 | CXCL14  | KICH | -0.236999394 | 0.055365246 |
| UPP1 | CXCL16  | KICH | -0.106954723 | 0.392685141 |
| UPP1 | CXCL17  | KICH | 0.436593646  | 0.000247471 |
| UPP1 | CXCL2   | KICH | -0.044406456 | 0.723307726 |
| UPP1 | CXCL3   | KICH | -0.136953443 | 0.272845513 |
| UPP1 | CXCL5   | KICH | 0.039469079  | 0.753031636 |
| UPP1 | CXCL6   | KICH | -0.253739634 | 0.039803616 |
| UPP1 | CXCL9   | KICH | 0.096460208  | 0.441019506 |
| UPP1 | IL10    | KICH | -0.199632095 | 0.108042619 |
| UPP1 | IL11    | KICH | 0.164138516  | 0.187858224 |
| UPP1 | IL12A   | KICH | 0.019714355  | 0.875153994 |
| UPP1 | IL12B   | KICH | 0.317304474  | 0.009431602 |
| UPP1 | IL13    | KICH | -0.168334601 | 0.176666246 |
| UPP1 | IL15    | KICH | 0.29010616   | 0.018134403 |
| UPP1 | IL16    | KICH | -0.098089668 | 0.433303798 |
| UPP1 | IL17A   | KICH | NA           | NA          |
| UPP1 | IL17B   | KICH | 0.171308257  | 0.169033934 |
| UPP1 | IL17C   | KICH | 0.114672212  | 0.359231232 |
| UPP1 | IL17D   | KICH | 0.213832073  | 0.084709604 |
| UPP1 | IL17F   | KICH | -0.245389595 | 0.047039703 |

|      |             |      |              |             |
|------|-------------|------|--------------|-------------|
| UPP1 | IL18        | KICH | 0.481622301  | 4.24E-05    |
| UPP1 | IL19        | KICH | 0.201715016  | 0.104338908 |
| UPP1 | IL1A        | KICH | 0.167254717  | 0.179499064 |
| UPP1 | IL1B        | KICH | -0.101480387 | 0.417495128 |
| UPP1 | IL2         | KICH | -0.230670651 | 0.062407791 |
| UPP1 | IL20        | KICH | 0.248402404  | 0.04431338  |
| UPP1 | IL21        | KICH | NA           | NA          |
| UPP1 | IL22        | KICH | NA           | NA          |
| UPP1 | IL24        | KICH | 0.066762646  | 0.594300782 |
| UPP1 | IL25        | KICH | 0.047135658  | 0.707047469 |
| UPP1 | IL26        | KICH | 0.202267362  | 0.103373472 |
| UPP1 | IL27        | KICH | 0.250043626  | 0.042883862 |
| UPP1 | IL29        | KICH | 0.164669454  | 0.186414516 |
| UPP1 | IL3         | KICH | 0.148180282  | 0.235073949 |
| UPP1 | IL31        | KICH | NA           | NA          |
| UPP1 | IL32        | KICH | 0.136654915  | 0.273902243 |
| UPP1 | IL33        | KICH | 0.06247407   | 0.618250356 |
| UPP1 | IL34        | KICH | -0.155511226 | 0.212455472 |
| UPP1 | IL4         | KICH | 0.19560724   | 0.115486272 |
| UPP1 | IL5         | KICH | -0.013991227 | 0.911220717 |
| UPP1 | IL6         | KICH | 0.027468081  | 0.82670509  |
| UPP1 | IL7         | KICH | -0.23300627  | 0.059728949 |
| UPP1 | IL8         | KICH | 0.012761861  | 0.918993994 |
| UPP1 | IL9         | KICH | NA           | NA          |
| UPP1 | TGFB1       | THCA | 0.394328853  | 3.10E-20    |
| UPP1 | TGFB2       | THCA | 0.38547923   | 2.45E-19    |
| UPP1 | TGFB3       | THCA | 0.130063791  | 0.003411237 |
| UPP1 | VEGFA       | THCA | -0.596799122 | 4.78E-50    |
| UPP1 | VEGFB       | THCA | -0.084080239 | 0.059008417 |
| UPP1 | VEGFC       | THCA | -0.304304731 | 2.79E-12    |
| UPP1 | CCL11       | THCA | 0.175226926  | 7.54E-05    |
| UPP1 | CCL13       | THCA | 0.656593859  | 1.32E-63    |
| UPP1 | CCL14       | THCA | -0.301923792 | 4.19E-12    |
| UPP1 | CCL14-CCL15 | THCA | -0.148718346 | 0.000801119 |
| UPP1 | CCL15       | THCA | -0.192593794 | 1.31E-05    |
| UPP1 | CCL1        | THCA | 0.325930395  | 5.81E-14    |
| UPP1 | CCL16       | THCA | -0.230144798 | 1.70E-07    |
| UPP1 | CCL17       | THCA | 0.618544105  | 1.22E-54    |
| UPP1 | CCL18       | THCA | 0.553713399  | 6.51E-42    |
| UPP1 | CCL19       | THCA | 0.282630701  | 9.94E-11    |
| UPP1 | CCL20       | THCA | 0.650847022  | 3.61E-62    |
| UPP1 | CCL21       | THCA | -0.001944263 | 0.965236281 |
| UPP1 | CCL22       | THCA | 0.584070902  | 1.62E-47    |

|      |         |      |              |             |
|------|---------|------|--------------|-------------|
| UPP1 | CCL23   | THCA | 0.509440169  | 1.05E-34    |
| UPP1 | CCL24   | THCA | 0.258613149  | 3.68E-09    |
| UPP1 | CCL25   | THCA | -0.039675178 | 0.373611062 |
| UPP1 | CCL26   | THCA | 0.204058291  | 3.78E-06    |
| UPP1 | CCL2    | THCA | 0.328024565  | 3.93E-14    |
| UPP1 | CCL27   | THCA | 0.101661543  | 0.022323381 |
| UPP1 | CCL28   | THCA | -0.282149116 | 1.07E-10    |
| UPP1 | CCL3    | THCA | 0.214923616  | 1.09E-06    |
| UPP1 | CCL3L1  | THCA | -0.025378459 | 0.569364071 |
| UPP1 | CCL3L3  | THCA | -0.194740032 | 1.04E-05    |
| UPP1 | CCL4    | THCA | 0.212782148  | 1.40E-06    |
| UPP1 | CCL4L2  | THCA | 0.104077997  | 0.019313567 |
| UPP1 | CCL5    | THCA | 0.270086454  | 6.85E-10    |
| UPP1 | CCL7    | THCA | 0.512103415  | 4.15E-35    |
| UPP1 | CCL8    | THCA | 0.132609302  | 0.002828047 |
| UPP1 | CROCCL1 | THCA | -0.109041954 | 0.014220088 |
| UPP1 | CROCCL2 | THCA | -0.206250077 | 2.96E-06    |
| UPP1 | CXCL10  | THCA | 0.255847989  | 5.46E-09    |
| UPP1 | CXCL11  | THCA | 0.225095528  | 3.19E-07    |
| UPP1 | CXCL12  | THCA | 0.007127691  | 0.873054349 |
| UPP1 | CXCL1   | THCA | 0.47206283   | 2.17E-29    |
| UPP1 | CXCL13  | THCA | 0.176057205  | 6.96E-05    |
| UPP1 | CXCL14  | THCA | 0.450477364  | 1.32E-26    |
| UPP1 | CXCL16  | THCA | 0.657613201  | 7.29E-64    |
| UPP1 | CXCL17  | THCA | 0.676092494  | 1.00E-68    |
| UPP1 | CXCL2   | THCA | 0.559137219  | 7.15E-43    |
| UPP1 | CXCL3   | THCA | 0.498070861  | 5.12E-33    |
| UPP1 | CXCL5   | THCA | 0.570286186  | 6.70E-45    |
| UPP1 | CXCL6   | THCA | 0.154737913  | 0.000483517 |
| UPP1 | CXCL9   | THCA | 0.177634235  | 5.97E-05    |
| UPP1 | IL10    | THCA | 0.189820284  | 1.75E-05    |
| UPP1 | IL11    | THCA | 0.258034984  | 4.00E-09    |
| UPP1 | IL12A   | THCA | -0.204509919 | 3.60E-06    |
| UPP1 | IL12B   | THCA | 0.210059414  | 1.92E-06    |
| UPP1 | IL13    | THCA | 0.144026412  | 0.001172416 |
| UPP1 | IL15    | THCA | 0.101368349  | 0.022714879 |
| UPP1 | IL16    | THCA | -0.003121663 | 0.944211985 |
| UPP1 | IL17A   | THCA | 0.154240768  | 0.000504459 |
| UPP1 | IL17B   | THCA | 0.054745688  | 0.219398614 |
| UPP1 | IL17C   | THCA | 0.486366392  | 2.40E-31    |
| UPP1 | IL17D   | THCA | -0.185792255 | 2.65E-05    |
| UPP1 | IL17F   | THCA | 0.072908994  | 0.101725719 |
| UPP1 | IL18    | THCA | 0.466580902  | 1.16E-28    |



|      |             |      |              |             |
|------|-------------|------|--------------|-------------|
| UPP1 | IL19        | THCA | -0.020969474 | 0.638273378 |
| UPP1 | IL1A        | THCA | 0.292461183  | 2.04E-11    |
| UPP1 | IL1B        | THCA | 0.21927766   | 6.49E-07    |
| UPP1 | IL2         | THCA | 0.119443726  | 0.007206709 |
| UPP1 | IL20        | THCA | -0.158361632 | 0.000353611 |
| UPP1 | IL21        | THCA | -0.009045957 | 0.83930465  |
| UPP1 | IL22        | THCA | 0.053980894  | 0.22591583  |
| UPP1 | IL24        | THCA | 0.362785156  | 3.73E-17    |
| UPP1 | IL25        | THCA | -0.136187339 | 0.002161122 |
| UPP1 | IL26        | THCA | 0.096551971  | 0.030050084 |
| UPP1 | IL27        | THCA | 0.110354192  | 0.013088968 |
| UPP1 | IL29        | THCA | 0.186921936  | 2.36E-05    |
| UPP1 | IL3         | THCA | 0.087100749  | 0.050439887 |
| UPP1 | IL31        | THCA | -0.129460509 | 0.003564563 |
| UPP1 | IL32        | THCA | 0.266507185  | 1.17E-09    |
| UPP1 | IL33        | THCA | -0.05028386  | 0.259361045 |
| UPP1 | IL34        | THCA | -0.065058347 | 0.144309709 |
| UPP1 | IL4         | THCA | 0.131384551  | 0.003096257 |
| UPP1 | IL5         | THCA | -0.011110798 | 0.803304258 |
| UPP1 | IL6         | THCA | 0.302820653  | 3.60E-12    |
| UPP1 | IL7         | THCA | 0.204639506  | 3.54E-06    |
| UPP1 | IL8         | THCA | 0.560561192  | 3.98E-43    |
| UPP1 | IL9         | THCA | 0.056861426  | 0.202073113 |
| UPP1 | TGFB1       | LGG  | 0.54253111   | 6.81E-42    |
| UPP1 | TGFB2       | LGG  | 0.63908182   | 3.50E-62    |
| UPP1 | TGFB3       | LGG  | 0.365953517  | 3.07E-18    |
| UPP1 | VEGFA       | LGG  | 0.301180601  | 1.42E-12    |
| UPP1 | VEGFB       | LGG  | 0.343953606  | 3.65E-16    |
| UPP1 | VEGFC       | LGG  | 0.298545456  | 2.26E-12    |
| UPP1 | CCL11       | LGG  | 0.127377261  | 0.003308754 |
| UPP1 | CCL13       | LGG  | 0.057396176  | 0.187059753 |
| UPP1 | CCL14       | LGG  | 0.142105186  | 0.001036434 |
| UPP1 | CCL14-CCL15 | LGG  | 0.068049441  | 0.117645968 |
| UPP1 | CCL15       | LGG  | 0.073564083  | 0.090671391 |
| UPP1 | CCL1        | LGG  | -0.145590934 | 0.000774446 |
| UPP1 | CCL16       | LGG  | 0.072506723  | 0.095418148 |
| UPP1 | CCL17       | LGG  | 0.307975627  | 4.16E-13    |
| UPP1 | CCL18       | LGG  | 0.053430628  | 0.219432515 |
| UPP1 | CCL19       | LGG  | 0.127987986  | 0.00316034  |
| UPP1 | CCL20       | LGG  | 0.433366564  | 1.12E-25    |
| UPP1 | CCL21       | LGG  | 0.174992963  | 5.11E-05    |
| UPP1 | CCL22       | LGG  | 0.353043826  | 5.30E-17    |
| UPP1 | CCL23       | LGG  | 0.262561696  | 8.34E-10    |

|      |         |     |              |             |
|------|---------|-----|--------------|-------------|
| UPP1 | CCL24   | LGG | -0.128770152 | 0.002979106 |
| UPP1 | CCL25   | LGG | 0.184741379  | 1.87E-05    |
| UPP1 | CCL26   | LGG | 0.269340057  | 2.92E-10    |
| UPP1 | CCL2    | LGG | 0.483210165  | 2.32E-32    |
| UPP1 | CCL27   | LGG | 0.318344473  | 6.02E-14    |
| UPP1 | CCL28   | LGG | 0.148408964  | 0.000609025 |
| UPP1 | CCL3    | LGG | 0.098340583  | 0.023567027 |
| UPP1 | CCL3L1  | LGG | 0.058001233  | 0.182446969 |
| UPP1 | CCL3L3  | LGG | 0.010355739  | 0.811997043 |
| UPP1 | CCL4    | LGG | 0.111474895  | 0.010220022 |
| UPP1 | CCL4L2  | LGG | 0.069398822  | 0.110526056 |
| UPP1 | CCL5    | LGG | 0.536403973  | 8.08E-41    |
| UPP1 | CCL7    | LGG | 0.301785692  | 1.27E-12    |
| UPP1 | CCL8    | LGG | 0.197099918  | 4.84E-06    |
| UPP1 | CROCCL1 | LGG | 0.183193343  | 2.20E-05    |
| UPP1 | CROCCL2 | LGG | 0.025013313  | 0.565575383 |
| UPP1 | CXCL10  | LGG | 0.530379774  | 8.75E-40    |
| UPP1 | CXCL11  | LGG | 0.445187359  | 3.66E-27    |
| UPP1 | CXCL12  | LGG | 0.14579286   | 0.000761332 |
| UPP1 | CXCL1   | LGG | 0.150143625  | 0.000524185 |
| UPP1 | CXCL13  | LGG | -0.191475492 | 9.05E-06    |
| UPP1 | CXCL14  | LGG | 0.283917983  | 2.77E-11    |
| UPP1 | CXCL16  | LGG | 0.43317645   | 1.18E-25    |
| UPP1 | CXCL17  | LGG | 0.047430771  | 0.275724709 |
| UPP1 | CXCL2   | LGG | 0.16496502   | 0.000136193 |
| UPP1 | CXCL3   | LGG | 0.08941331   | 0.039617801 |
| UPP1 | CXCL5   | LGG | -0.024847745 | 0.568151793 |
| UPP1 | CXCL6   | LGG | 0.281103433  | 4.41E-11    |
| UPP1 | CXCL9   | LGG | 0.438300164  | 2.73E-26    |
| UPP1 | IL10    | LGG | 0.416399964  | 1.22E-23    |
| UPP1 | IL11    | LGG | 0.189352655  | 1.14E-05    |
| UPP1 | IL12A   | LGG | -0.024876315 | 0.567706818 |
| UPP1 | IL12B   | LGG | 0.099947136  | 0.021375354 |
| UPP1 | IL13    | LGG | 0.127436982  | 0.003293967 |
| UPP1 | IL15    | LGG | 0.597110423  | 1.63E-52    |
| UPP1 | IL16    | LGG | 0.404484358  | 2.79E-22    |
| UPP1 | IL17A   | LGG | -0.004416217 | 0.919209607 |
| UPP1 | IL17B   | LGG | 0.344996883  | 2.93E-16    |
| UPP1 | IL17C   | LGG | 0.032160601  | 0.460006795 |
| UPP1 | IL17D   | LGG | -0.157780844 | 0.000265652 |
| UPP1 | IL17F   | LGG | 0.105742815  | 0.014872614 |
| UPP1 | IL18    | LGG | 0.561930367  | 1.92E-45    |
| UPP1 | IL19    | LGG | 0.029276727  | 0.50123127  |

|      |             |      |              |             |
|------|-------------|------|--------------|-------------|
| UPP1 | IL1A        | LGG  | 0.37563971   | 3.32E-19    |
| UPP1 | IL1B        | LGG  | 0.23782805   | 2.99E-08    |
| UPP1 | IL2         | LGG  | 0.176471639  | 4.40E-05    |
| UPP1 | IL20        | LGG  | 0.082510029  | 0.057659679 |
| UPP1 | IL21        | LGG  | 0.114092891  | 0.008563544 |
| UPP1 | IL22        | LGG  | 0.096899254  | 0.025696167 |
| UPP1 | IL24        | LGG  | 0.181181244  | 2.72E-05    |
| UPP1 | IL25        | LGG  | -0.000807618 | 0.985200998 |
| UPP1 | IL26        | LGG  | 0.124102353  | 0.004218091 |
| UPP1 | IL27        | LGG  | 0.406640595  | 1.60E-22    |
| UPP1 | IL29        | LGG  | 0.086305626  | 0.047042176 |
| UPP1 | IL3         | LGG  | 0.040102928  | 0.356826174 |
| UPP1 | IL31        | LGG  | 0.035683484  | 0.412320429 |
| UPP1 | IL32        | LGG  | 0.338355789  | 1.16E-15    |
| UPP1 | IL33        | LGG  | 0.007500263  | 0.86323017  |
| UPP1 | IL34        | LGG  | 0.013438367  | 0.757581742 |
| UPP1 | IL4         | LGG  | 0.092065025  | 0.034090991 |
| UPP1 | IL5         | LGG  | 0.018962291  | 0.663160954 |
| UPP1 | IL6         | LGG  | 0.418736779  | 6.47E-24    |
| UPP1 | IL7         | LGG  | 0.362519615  | 6.63E-18    |
| UPP1 | IL8         | LGG  | 0.191252227  | 9.27E-06    |
| UPP1 | IL9         | LGG  | -0.203206029 | 2.40E-06    |
| UPP1 | TGFB1       | LUAD | 0.291254542  | 1.44E-11    |
| UPP1 | TGFB2       | LUAD | 0.018174952  | 0.680127477 |
| UPP1 | TGFB3       | LUAD | 0.020624665  | 0.639877014 |
| UPP1 | VEGFA       | LUAD | 0.227725781  | 1.66E-07    |
| UPP1 | VEGFB       | LUAD | 0.189822861  | 1.39E-05    |
| UPP1 | VEGFC       | LUAD | 0.142781659  | 0.001132516 |
| UPP1 | CCL11       | LUAD | 0.294041984  | 9.04E-12    |
| UPP1 | CCL13       | LUAD | 0.313998792  | 2.71E-13    |
| UPP1 | CCL14       | LUAD | -0.093051401 | 0.034409617 |
| UPP1 | CCL14-CCL15 | LUAD | -0.081431151 | 0.064292857 |
| UPP1 | CCL15       | LUAD | -0.049832739 | 0.258038768 |
| UPP1 | CCL1        | LUAD | 0.271900449  | 3.25E-10    |
| UPP1 | CCL16       | LUAD | -0.162657717 | 0.000203796 |
| UPP1 | CCL17       | LUAD | 0.326879332  | 2.44E-14    |
| UPP1 | CCL18       | LUAD | 0.152658166  | 0.000495606 |
| UPP1 | CCL19       | LUAD | 0.100123287  | 0.022799369 |
| UPP1 | CCL20       | LUAD | 0.229071609  | 1.39E-07    |
| UPP1 | CCL21       | LUAD | 0.126915646  | 0.003846623 |
| UPP1 | CCL22       | LUAD | 0.24752375   | 1.17E-08    |
| UPP1 | CCL23       | LUAD | 0.236427583  | 5.32E-08    |
| UPP1 | CCL24       | LUAD | 0.110792519  | 0.011707938 |

|      |         |      |              |             |
|------|---------|------|--------------|-------------|
| UPP1 | CCL25   | LUAD | 0.084369276  | 0.055220957 |
| UPP1 | CCL26   | LUAD | 0.273583544  | 2.50E-10    |
| UPP1 | CCL2    | LUAD | 0.309445558  | 6.18E-13    |
| UPP1 | CCL27   | LUAD | -0.02368932  | 0.590983923 |
| UPP1 | CCL28   | LUAD | 0.273095458  | 2.70E-10    |
| UPP1 | CCL3    | LUAD | 0.320495724  | 8.17E-14    |
| UPP1 | CCL3L1  | LUAD | 0.258395102  | 2.48E-09    |
| UPP1 | CCL3L3  | LUAD | 0.016954167  | 0.700539582 |
| UPP1 | CCL4    | LUAD | 0.259414283  | 2.14E-09    |
| UPP1 | CCL4L2  | LUAD | 0.284251456  | 4.58E-11    |
| UPP1 | CCL5    | LUAD | 0.157859018  | 0.000314239 |
| UPP1 | CCL7    | LUAD | 0.385650055  | 8.87E-20    |
| UPP1 | CCL8    | LUAD | 0.243328215  | 2.10E-08    |
| UPP1 | CROCCL1 | LUAD | -0.16056538  | 0.000246517 |
| UPP1 | CROCCL2 | LUAD | -0.243709694 | 1.99E-08    |
| UPP1 | CXCL10  | LUAD | 0.256098411  | 3.47E-09    |
| UPP1 | CXCL11  | LUAD | 0.21082101   | 1.32E-06    |
| UPP1 | CXCL12  | LUAD | 0.018925553  | 0.66769097  |
| UPP1 | CXCL1   | LUAD | 0.225730172  | 2.13E-07    |
| UPP1 | CXCL13  | LUAD | 0.087862177  | 0.045846317 |
| UPP1 | CXCL14  | LUAD | 0.171050639  | 9.28E-05    |
| UPP1 | CXCL16  | LUAD | -0.016599746 | 0.706507079 |
| UPP1 | CXCL17  | LUAD | -0.04096668  | 0.352567338 |
| UPP1 | CXCL2   | LUAD | 0.225759368  | 2.13E-07    |
| UPP1 | CXCL3   | LUAD | 0.160977302  | 0.000237495 |
| UPP1 | CXCL5   | LUAD | 0.154977923  | 0.000405171 |
| UPP1 | CXCL6   | LUAD | 0.167977864  | 0.000124306 |
| UPP1 | CXCL9   | LUAD | 0.090220713  | 0.040303608 |
| UPP1 | IL10    | LUAD | 0.156887948  | 0.000342512 |
| UPP1 | IL11    | LUAD | 0.191518199  | 1.16E-05    |
| UPP1 | IL12A   | LUAD | 0.03545589   | 0.421117131 |
| UPP1 | IL12B   | LUAD | 0.061503716  | 0.162598214 |
| UPP1 | IL13    | LUAD | 0.087625916  | 0.04643525  |
| UPP1 | IL15    | LUAD | 0.33203926   | 9.01E-15    |
| UPP1 | IL16    | LUAD | 0.003002147  | 0.945708692 |
| UPP1 | IL17A   | LUAD | 0.001246582  | 0.977442244 |
| UPP1 | IL17B   | LUAD | 0.106641917  | 0.015273137 |
| UPP1 | IL17C   | LUAD | -0.005261319 | 0.905005043 |
| UPP1 | IL17D   | LUAD | -0.058954532 | 0.180764039 |
| UPP1 | IL17F   | LUAD | -0.045517244 | 0.30161102  |
| UPP1 | IL18    | LUAD | 0.237351541  | 4.71E-08    |
| UPP1 | IL19    | LUAD | -0.114518432 | 0.009156517 |
| UPP1 | IL1A    | LUAD | 0.403755033  | 1.08E-21    |

|      |             |      |              |             |
|------|-------------|------|--------------|-------------|
| UPP1 | IL1B        | LUAD | 0.294965355  | 7.73E-12    |
| UPP1 | IL2         | LUAD | 0.058194902  | 0.18645756  |
| UPP1 | IL20        | LUAD | -0.01856789  | 0.673605902 |
| UPP1 | IL21        | LUAD | 0.006013276  | 0.891506683 |
| UPP1 | IL22        | LUAD | -0.037804968 | 0.390991001 |
| UPP1 | IL24        | LUAD | 0.114133599  | 0.00939492  |
| UPP1 | IL25        | LUAD | -0.057977377 | 0.188112011 |
| UPP1 | IL26        | LUAD | 0.013702657  | 0.75593256  |
| UPP1 | IL27        | LUAD | 0.305057614  | 1.35E-12    |
| UPP1 | IL29        | LUAD | 0.178958519  | 4.27E-05    |
| UPP1 | IL3         | LUAD | 0.030125938  | 0.494297469 |
| UPP1 | IL31        | LUAD | -0.04748373  | 0.28118449  |
| UPP1 | IL32        | LUAD | 0.368620216  | 4.38E-18    |
| UPP1 | IL33        | LUAD | -0.144940913 | 0.000949408 |
| UPP1 | IL34        | LUAD | 0.099724374  | 0.023349745 |
| UPP1 | IL4         | LUAD | 0.039054422  | 0.375513065 |
| UPP1 | IL5         | LUAD | 0.012386102  | 0.778741277 |
| UPP1 | IL6         | LUAD | 0.171941478  | 8.52E-05    |
| UPP1 | IL7         | LUAD | 0.259657134  | 2.06E-09    |
| UPP1 | IL8         | LUAD | 0.307085267  | 9.42E-13    |
| UPP1 | IL9         | LUAD | 0.003084381  | 0.944223954 |
| UPP1 | TGFB1       | MESO | 0.425324202  | 4.02E-05    |
| UPP1 | TGFB2       | MESO | -0.202902646 | 0.059452366 |
| UPP1 | TGFB3       | MESO | -0.245824811 | 0.021728765 |
| UPP1 | VEGFA       | MESO | 0.242997527  | 0.023338098 |
| UPP1 | VEGFB       | MESO | 0.126585681  | 0.242668857 |
| UPP1 | VEGFC       | MESO | 0.422742924  | 4.52E-05    |
| UPP1 | CCL11       | MESO | 0.344619067  | 0.001080656 |
| UPP1 | CCL13       | MESO | 0.376892069  | 0.000320405 |
| UPP1 | CCL14       | MESO | 0.06319244   | 0.560919509 |
| UPP1 | CCL14-CCL15 | MESO | 0.083307972  | 0.442997707 |
| UPP1 | CCL15       | MESO | 0.203801585  | 0.058309594 |
| UPP1 | CCL1        | MESO | 0.322239795  | 0.002336015 |
| UPP1 | CCL16       | MESO | 0.061172945  | 0.573531549 |
| UPP1 | CCL17       | MESO | 0.267875748  | 0.012125709 |
| UPP1 | CCL18       | MESO | 0.459496023  | 7.57E-06    |
| UPP1 | CCL19       | MESO | 0.06348383   | 0.559110678 |
| UPP1 | CCL20       | MESO | 0.530885788  | 1.23E-07    |
| UPP1 | CCL21       | MESO | 0.270529265  | 0.01126795  |
| UPP1 | CCL22       | MESO | 0.224504661  | 0.036571278 |
| UPP1 | CCL23       | MESO | 0.377885005  | 0.000308013 |
| UPP1 | CCL24       | MESO | 0.116446875  | 0.282780778 |
| UPP1 | CCL25       | MESO | 0.019041436  | 0.861037445 |

|      |         |      |              |             |
|------|---------|------|--------------|-------------|
| UPP1 | CCL26   | MESO | 0.333324269  | 0.001606011 |
| UPP1 | CCL2    | MESO | 0.351668509  | 0.000837579 |
| UPP1 | CCL27   | MESO | 0.096191526  | 0.375458396 |
| UPP1 | CCL28   | MESO | 0.032805402  | 0.762923549 |
| UPP1 | CCL3    | MESO | 0.43688395   | 2.33E-05    |
| UPP1 | CCL3L1  | MESO | 0.339137227  | 0.001312182 |
| UPP1 | CCL3L3  | MESO | 0.075268848  | 0.488378279 |
| UPP1 | CCL4    | MESO | 0.407275893  | 9.04E-05    |
| UPP1 | CCL4L2  | MESO | 0.416873336  | 5.91E-05    |
| UPP1 | CCL5    | MESO | 0.428280178  | 3.50E-05    |
| UPP1 | CCL7    | MESO | 0.193072854  | 0.073178544 |
| UPP1 | CCL8    | MESO | 0.490514149  | 1.41E-06    |
| UPP1 | CROCCL1 | MESO | -0.187206779 | 0.082514579 |
| UPP1 | CROCCL2 | MESO | -0.351371185 | 0.00084673  |
| UPP1 | CXCL10  | MESO | 0.273357856  | 0.010412335 |
| UPP1 | CXCL11  | MESO | 0.28650239   | 0.007138554 |
| UPP1 | CXCL12  | MESO | -0.114817629 | 0.289615937 |
| UPP1 | CXCL1   | MESO | 0.069464398  | 0.522613236 |
| UPP1 | CXCL13  | MESO | 0.24603861   | 0.021611023 |
| UPP1 | CXCL14  | MESO | 0.104280327  | 0.336442708 |
| UPP1 | CXCL16  | MESO | 0.34956242   | 0.000904387 |
| UPP1 | CXCL17  | MESO | 0.161773017  | 0.134400266 |
| UPP1 | CXCL2   | MESO | 0.318121177  | 0.002675621 |
| UPP1 | CXCL3   | MESO | 0.310901583  | 0.003379181 |
| UPP1 | CXCL5   | MESO | 0.140210954  | 0.195218802 |
| UPP1 | CXCL6   | MESO | -0.178051864 | 0.098953358 |
| UPP1 | CXCL9   | MESO | 0.284206133  | 0.007634761 |
| UPP1 | IL10    | MESO | 0.077076276  | 0.477965878 |
| UPP1 | IL11    | MESO | 0.305237112  | 0.004042472 |
| UPP1 | IL12A   | MESO | 0.303793388  | 0.004229092 |
| UPP1 | IL12B   | MESO | 0.099580027  | 0.358791614 |
| UPP1 | IL13    | MESO | 0.374478249  | 0.000352468 |
| UPP1 | IL15    | MESO | 0.162969511  | 0.131504676 |
| UPP1 | IL16    | MESO | -0.274538527 | 0.010072344 |
| UPP1 | IL17A   | MESO | 0.13823607   | 0.201647749 |
| UPP1 | IL17B   | MESO | 0.201613677  | 0.061122747 |
| UPP1 | IL17C   | MESO | 0.137527451  | 0.203991116 |
| UPP1 | IL17D   | MESO | -0.166254297 | 0.12379946  |
| UPP1 | IL17F   | MESO | 0.112066541  | 0.301403638 |
| UPP1 | IL18    | MESO | 0.027525265  | 0.800211702 |
| UPP1 | IL19    | MESO | -0.159481677 | 0.140080251 |
| UPP1 | IL1A    | MESO | 0.302030107  | 0.004467403 |
| UPP1 | IL1B    | MESO | 0.261412725  | 0.014456404 |

|      |             |      |              |             |
|------|-------------|------|--------------|-------------|
| UPP1 | IL2         | MESO | 0.237932812  | 0.026475562 |
| UPP1 | IL20        | MESO | 0.017843967  | 0.869697154 |
| UPP1 | IL21        | MESO | 0.115438806  | 0.286997142 |
| UPP1 | IL22        | MESO | 0.039799253  | 0.714366171 |
| UPP1 | IL24        | MESO | 0.060334084  | 0.578808892 |
| UPP1 | IL25        | MESO | 0.031448627  | 0.77245733  |
| UPP1 | IL26        | MESO | 0.000386307  | 0.997166626 |
| UPP1 | IL27        | MESO | 0.487905175  | 1.64E-06    |
| UPP1 | IL29        | MESO | 0.192416952  | 0.07417828  |
| UPP1 | IL3         | MESO | 0.007920168  | 0.941959669 |
| UPP1 | IL31        | MESO | 0.048447662  | 0.655874987 |
| UPP1 | IL32        | MESO | 0.502145584  | 7.22E-07    |
| UPP1 | IL33        | MESO | 0.013751721  | 0.899400863 |
| UPP1 | IL34        | MESO | -0.018660896 | 0.863787658 |
| UPP1 | IL4         | MESO | 0.287481641  | 0.006935743 |
| UPP1 | IL5         | MESO | 0.250246482  | 0.019402284 |
| UPP1 | IL6         | MESO | 0.409859902  | 8.07E-05    |
| UPP1 | IL7         | MESO | -0.135905232 | 0.20942884  |
| UPP1 | IL8         | MESO | 0.366985807  | 0.000471693 |
| UPP1 | IL9         | MESO | -0.050692576 | 0.64100794  |
| UPP1 | TGFB1       | PCPG | 0.167585193  | 0.023741482 |
| UPP1 | TGFB2       | PCPG | -0.103250089 | 0.165431815 |
| UPP1 | TGFB3       | PCPG | 0.306888789  | 2.51E-05    |
| UPP1 | VEGFA       | PCPG | 0.046904457  | 0.529504795 |
| UPP1 | VEGFB       | PCPG | 0.306009187  | 2.66E-05    |
| UPP1 | VEGFC       | PCPG | 0.1946553    | 0.008458785 |
| UPP1 | CCL11       | PCPG | 0.325064882  | 7.56E-06    |
| UPP1 | CCL13       | PCPG | 0.184278367  | 0.012763994 |
| UPP1 | CCL14       | PCPG | 0.164315818  | 0.026653415 |
| UPP1 | CCL14-CCL15 | PCPG | -0.052811049 | 0.478917    |
| UPP1 | CCL15       | PCPG | 0.028948118  | 0.698073725 |
| UPP1 | CCL1        | PCPG | 0.020210784  | 0.78653913  |
| UPP1 | CCL16       | PCPG | 0.010015266  | 0.893255685 |
| UPP1 | CCL17       | PCPG | 0.336026715  | 3.53E-06    |
| UPP1 | CCL18       | PCPG | 0.265614699  | 0.00029012  |
| UPP1 | CCL19       | PCPG | 0.262046298  | 0.000352252 |
| UPP1 | CCL20       | PCPG | 0.488023891  | 2.79E-12    |
| UPP1 | CCL21       | PCPG | 0.218014878  | 0.003110867 |
| UPP1 | CCL22       | PCPG | 0.466372484  | 3.24E-11    |
| UPP1 | CCL23       | PCPG | 0.113906226  | 0.125749898 |
| UPP1 | CCL24       | PCPG | 0.040618686  | 0.586148858 |
| UPP1 | CCL25       | PCPG | 0.123529376  | 0.096635213 |
| UPP1 | CCL26       | PCPG | 0.187067189  | 0.011450254 |

|      |         |      |              |             |
|------|---------|------|--------------|-------------|
| UPP1 | CCL2    | PCPG | 0.422450403  | 2.84E-09    |
| UPP1 | CCL27   | PCPG | 0.204559461  | 0.005605684 |
| UPP1 | CCL28   | PCPG | 0.011302672  | 0.879632085 |
| UPP1 | CCL3    | PCPG | 0.217985677  | 0.003114963 |
| UPP1 | CCL3L1  | PCPG | 0.231268868  | 0.001682644 |
| UPP1 | CCL3L3  | PCPG | 0.059792865  | 0.422662986 |
| UPP1 | CCL4    | PCPG | 0.266162173  | 0.000281543 |
| UPP1 | CCL4L2  | PCPG | 0.275495608  | 0.000167126 |
| UPP1 | CCL5    | PCPG | 0.428784338  | 1.55E-09    |
| UPP1 | CCL7    | PCPG | 0.453239207  | 1.32E-10    |
| UPP1 | CCL8    | PCPG | 0.311014654  | 1.93E-05    |
| UPP1 | CROCCL1 | PCPG | -0.17850961  | 0.015907468 |
| UPP1 | CROCCL2 | PCPG | -0.267706057 | 0.000258606 |
| UPP1 | CXCL10  | PCPG | 0.277896119  | 0.000145702 |
| UPP1 | CXCL11  | PCPG | 0.213279738  | 0.00384246  |
| UPP1 | CXCL12  | PCPG | 0.129038271  | 0.082547405 |
| UPP1 | CXCL1   | PCPG | 0.354465639  | 9.14E-07    |
| UPP1 | CXCL13  | PCPG | 0.086209381  | 0.247202647 |
| UPP1 | CXCL14  | PCPG | 0.064134091  | 0.389711412 |
| UPP1 | CXCL16  | PCPG | 0.390374267  | 5.10E-08    |
| UPP1 | CXCL17  | PCPG | 0.12262926   | 0.099108489 |
| UPP1 | CXCL2   | PCPG | 0.438285254  | 6.09E-10    |
| UPP1 | CXCL3   | PCPG | 0.398677089  | 2.49E-08    |
| UPP1 | CXCL5   | PCPG | 0.285344822  | 9.44E-05    |
| UPP1 | CXCL6   | PCPG | 0.214075751  | 0.003709549 |
| UPP1 | CXCL9   | PCPG | 0.194661566  | 0.008456633 |
| UPP1 | IL10    | PCPG | 0.293141478  | 5.92E-05    |
| UPP1 | IL11    | PCPG | 0.121673329  | 0.101789703 |
| UPP1 | IL12A   | PCPG | -0.137217649 | 0.064723952 |
| UPP1 | IL12B   | PCPG | 0.048094202  | 0.519102738 |
| UPP1 | IL13    | PCPG | 0.111284554  | 0.134753681 |
| UPP1 | IL15    | PCPG | 0.26397124   | 0.00031735  |
| UPP1 | IL16    | PCPG | 0.103203837  | 0.165622372 |
| UPP1 | IL17A   | PCPG | 0.008843184  | 0.90568622  |
| UPP1 | IL17B   | PCPG | 0.103913087  | 0.162718245 |
| UPP1 | IL17C   | PCPG | 0.07253586   | 0.33050234  |
| UPP1 | IL17D   | PCPG | -0.033051133 | 0.657814128 |
| UPP1 | IL17F   | PCPG | 0.164572463  | 0.026414257 |
| UPP1 | IL18    | PCPG | 0.428282453  | 1.63E-09    |
| UPP1 | IL19    | PCPG | 0.163158229  | 0.027755314 |
| UPP1 | IL1A    | PCPG | 0.263459704  | 0.000326297 |
| UPP1 | IL1B    | PCPG | 0.25077321   | 0.000638914 |
| UPP1 | IL2     | PCPG | 0.049495743  | 0.506984586 |



|      |             |      |              |             |
|------|-------------|------|--------------|-------------|
| UPP1 | IL20        | PCPG | 0.133292119  | 0.072839911 |
| UPP1 | IL21        | PCPG | -0.034120425 | 0.647475994 |
| UPP1 | IL22        | PCPG | 0.085419182  | 0.251578056 |
| UPP1 | IL24        | PCPG | 0.265386328  | 0.00029377  |
| UPP1 | IL25        | PCPG | -0.00303502  | 0.967564844 |
| UPP1 | IL26        | PCPG | 0.078612059  | 0.291488882 |
| UPP1 | IL27        | PCPG | 0.328550058  | 5.95E-06    |
| UPP1 | IL29        | PCPG | -0.019817191 | 0.790599205 |
| UPP1 | IL3         | PCPG | 0.06995781   | 0.348023371 |
| UPP1 | IL31        | PCPG | -0.020106082 | 0.78761862  |
| UPP1 | IL32        | PCPG | 0.457048364  | 8.84E-11    |
| UPP1 | IL33        | PCPG | 0.173074141  | 0.019466703 |
| UPP1 | IL34        | PCPG | 0.161604039  | 0.029295817 |
| UPP1 | IL4         | PCPG | 0.014148741  | 0.849645067 |
| UPP1 | IL5         | PCPG | 0.112170879  | 0.131656023 |
| UPP1 | IL6         | PCPG | 0.399480621  | 2.32E-08    |
| UPP1 | IL7         | PCPG | 0.146382208  | 0.048628749 |
| UPP1 | IL8         | PCPG | 0.394044635  | 3.72E-08    |
| UPP1 | IL9         | PCPG | 0.200829408  | 0.006559407 |
| UPP1 | TGFB1       | TGCT | -0.230005099 | 0.003870986 |
| UPP1 | TGFB2       | TGCT | -0.660893487 | 6.11E-21    |
| UPP1 | TGFB3       | TGCT | -0.503194881 | 2.16E-11    |
| UPP1 | VEGFA       | TGCT | -0.423271363 | 3.69E-08    |
| UPP1 | VEGFB       | TGCT | -0.409156878 | 1.14E-07    |
| UPP1 | VEGFC       | TGCT | -0.34730678  | 8.91E-06    |
| UPP1 | CCL11       | TGCT | -0.06212601  | 0.441028478 |
| UPP1 | CCL13       | TGCT | -0.08183993  | 0.309789233 |
| UPP1 | CCL14       | TGCT | -0.342811595 | 1.18E-05    |
| UPP1 | CCL14-CCL15 | TGCT | -0.589276201 | 5.86E-16    |
| UPP1 | CCL15       | TGCT | -0.54644937  | 1.59E-13    |
| UPP1 | CCL1        | TGCT | 0.171132258  | 0.032676633 |
| UPP1 | CCL16       | TGCT | -0.447167355 | 4.85E-09    |
| UPP1 | CCL17       | TGCT | -0.074120955 | 0.357786723 |
| UPP1 | CCL18       | TGCT | 0.300586564  | 0.000137465 |
| UPP1 | CCL19       | TGCT | 0.173674811  | 0.030139121 |
| UPP1 | CCL20       | TGCT | -0.344805786 | 1.04E-05    |
| UPP1 | CCL21       | TGCT | 0.044639147  | 0.58003427  |
| UPP1 | CCL22       | TGCT | 0.038136338  | 0.636453    |
| UPP1 | CCL23       | TGCT | -0.01691522  | 0.833990121 |
| UPP1 | CCL24       | TGCT | 0.235378007  | 0.003097423 |
| UPP1 | CCL25       | TGCT | -0.384487642 | 7.22E-07    |
| UPP1 | CCL26       | TGCT | 0.76949924   | 8.50E-32    |
| UPP1 | CCL2        | TGCT | 0.176712072  | 0.027329506 |

|      |         |      |              |             |
|------|---------|------|--------------|-------------|
| UPP1 | CCL27   | TGCT | 0.039595095  | 0.623597806 |
| UPP1 | CCL28   | TGCT | 0.230393109  | 0.003809789 |
| UPP1 | CCL3    | TGCT | 0.417155203  | 6.05E-08    |
| UPP1 | CCL3L1  | TGCT | 0.242883067  | 0.002249909 |
| UPP1 | CCL3L3  | TGCT | -0.06620836  | 0.411536343 |
| UPP1 | CCL4    | TGCT | 0.429945537  | 2.13E-08    |
| UPP1 | CCL4L2  | TGCT | 0.261305967  | 0.000984565 |
| UPP1 | CCL5    | TGCT | 0.318898676  | 4.96E-05    |
| UPP1 | CCL7    | TGCT | 0.345086896  | 1.03E-05    |
| UPP1 | CCL8    | TGCT | 0.484470822  | 1.47E-10    |
| UPP1 | CROCCL1 | TGCT | -0.33899374  | 1.50E-05    |
| UPP1 | CROCCL2 | TGCT | -0.562679231 | 2.09E-14    |
| UPP1 | CXCL10  | TGCT | 0.416879516  | 6.18E-08    |
| UPP1 | CXCL11  | TGCT | 0.399934139  | 2.31E-07    |
| UPP1 | CXCL12  | TGCT | -0.156199671 | 0.051509312 |
| UPP1 | CXCL1   | TGCT | -0.402973308 | 1.83E-07    |
| UPP1 | CXCL13  | TGCT | 0.319647647  | 4.75E-05    |
| UPP1 | CXCL14  | TGCT | -0.570035974 | 8.04E-15    |
| UPP1 | CXCL16  | TGCT | 0.010007802  | 0.901319061 |
| UPP1 | CXCL17  | TGCT | -0.368879912 | 2.15E-06    |
| UPP1 | CXCL2   | TGCT | -0.181036863 | 0.023716806 |
| UPP1 | CXCL3   | TGCT | -0.31463856  | 6.33E-05    |
| UPP1 | CXCL5   | TGCT | -0.38400453  | 7.47E-07    |
| UPP1 | CXCL6   | TGCT | -0.543305735 | 2.33E-13    |
| UPP1 | CXCL9   | TGCT | 0.274336091  | 0.000528984 |
| UPP1 | IL10    | TGCT | 0.310827348  | 7.84E-05    |
| UPP1 | IL11    | TGCT | 0.24795129   | 0.001803068 |
| UPP1 | IL12A   | TGCT | -0.080631507 | 0.317011528 |
| UPP1 | IL12B   | TGCT | 0.183587292  | 0.021784911 |
| UPP1 | IL13    | TGCT | 0.038926076  | 0.629479712 |
| UPP1 | IL15    | TGCT | 0.505422036  | 1.71E-11    |
| UPP1 | IL16    | TGCT | -0.051228393 | 0.525354269 |
| UPP1 | IL17A   | TGCT | -0.003907699 | 0.96138567  |
| UPP1 | IL17B   | TGCT | -0.393975299 | 3.61E-07    |
| UPP1 | IL17C   | TGCT | 0.364111693  | 2.97E-06    |
| UPP1 | IL17D   | TGCT | -0.407294913 | 1.31E-07    |
| UPP1 | IL17F   | TGCT | 0.153005014  | 0.056532744 |
| UPP1 | IL18    | TGCT | 0.111680186  | 0.165133137 |
| UPP1 | IL19    | TGCT | 0.307697708  | 9.33E-05    |
| UPP1 | IL1A    | TGCT | 0.019553461  | 0.808561928 |
| UPP1 | IL1B    | TGCT | 0.217394947  | 0.006408622 |
| UPP1 | IL2     | TGCT | 0.045414171  | 0.573467913 |
| UPP1 | IL20    | TGCT | 0.510326173  | 1.01E-11    |

|      |             |      |              |             |
|------|-------------|------|--------------|-------------|
| UPP1 | IL21        | TGCT | -0.022727211 | 0.77823783  |
| UPP1 | IL22        | TGCT | -0.087178318 | 0.279180784 |
| UPP1 | IL24        | TGCT | 0.311195998  | 7.68E-05    |
| UPP1 | IL25        | TGCT | 0.035284781  | 0.661894812 |
| UPP1 | IL26        | TGCT | 0.092613309  | 0.250180937 |
| UPP1 | IL27        | TGCT | 0.492119733  | 6.82E-11    |
| UPP1 | IL29        | TGCT | 0.155591119  | 0.052436613 |
| UPP1 | IL3         | TGCT | 0.187981395  | 0.018773724 |
| UPP1 | IL31        | TGCT | 0.116282727  | 0.148289756 |
| UPP1 | IL32        | TGCT | 0.269213736  | 0.000677812 |
| UPP1 | IL33        | TGCT | -0.183236103 | 0.022042604 |
| UPP1 | IL34        | TGCT | 0.150523772  | 0.060707199 |
| UPP1 | IL4         | TGCT | -0.090779408 | 0.259723727 |
| UPP1 | IL5         | TGCT | 0.145586685  | 0.069765963 |
| UPP1 | IL6         | TGCT | 0.7214548    | 2.33E-26    |
| UPP1 | IL7         | TGCT | -0.408343176 | 1.21E-07    |
| UPP1 | IL8         | TGCT | -0.069273363 | 0.390175946 |
| UPP1 | IL9         | TGCT | 0.146454488  | 0.068098532 |
| UPP1 | TGFB1       | UVM  | 0.359523618  | 0.001055439 |
| UPP1 | TGFB2       | UVM  | 0.256624571  | 0.021571998 |
| UPP1 | TGFB3       | UVM  | -0.020004193 | 0.860196094 |
| UPP1 | VEGFA       | UVM  | -0.060877461 | 0.591659459 |
| UPP1 | VEGFB       | UVM  | 0.173968922  | 0.122750695 |
| UPP1 | VEGFC       | UVM  | 0.300510035  | 0.006759864 |
| UPP1 | CCL11       | UVM  | 0.089117446  | 0.431802133 |
| UPP1 | CCL13       | UVM  | 0.200112178  | 0.075119022 |
| UPP1 | CCL14       | UVM  | 0.226108544  | 0.043721975 |
| UPP1 | CCL14-CCL15 | UVM  | 0.129574253  | 0.251983812 |
| UPP1 | CCL15       | UVM  | 0.024272474  | 0.830769902 |
| UPP1 | CCL1        | UVM  | 0.038244393  | 0.736261748 |
| UPP1 | CCL16       | UVM  | 0.109348358  | 0.334270508 |
| UPP1 | CCL17       | UVM  | -0.032825841 | 0.772535259 |
| UPP1 | CCL18       | UVM  | 0.280105872  | 0.011852465 |
| UPP1 | CCL19       | UVM  | 0.196921078  | 0.079983448 |
| UPP1 | CCL20       | UVM  | 0.106707538  | 0.346144797 |
| UPP1 | CCL21       | UVM  | 0.134391308  | 0.2346307   |
| UPP1 | CCL22       | UVM  | 0.31265812   | 0.00474808  |
| UPP1 | CCL23       | UVM  | 0.054756516  | 0.629513796 |
| UPP1 | CCL24       | UVM  | 0.168617291  | 0.134875095 |
| UPP1 | CCL25       | UVM  | 0.140687924  | 0.213224362 |
| UPP1 | CCL26       | UVM  | 0.193707165  | 0.085133106 |
| UPP1 | CCL2        | UVM  | 0.173707756  | 0.123322302 |
| UPP1 | CCL27       | UVM  | -0.124825377 | 0.269930782 |

|      |         |     |              |             |
|------|---------|-----|--------------|-------------|
| UPP1 | CCL28   | UVM | -0.176932543 | 0.116405654 |
| UPP1 | CCL3    | UVM | 0.295385281  | 0.007812621 |
| UPP1 | CCL3L1  | UVM | 0.407999391  | 0.000172177 |
| UPP1 | CCL3L3  | UVM | 0.010043373  | 0.92954361  |
| UPP1 | CCL4    | UVM | 0.346914696  | 0.001618318 |
| UPP1 | CCL4L2  | UVM | 0.391613244  | 0.000327936 |
| UPP1 | CCL5    | UVM | 0.369151896  | 0.000752541 |
| UPP1 | CCL7    | UVM | 0.129759334  | 0.251301279 |
| UPP1 | CCL8    | UVM | 0.154524706  | 0.17112606  |
| UPP1 | CROCCL1 | UVM | -0.179410703 | 0.111296541 |
| UPP1 | CROCCL2 | UVM | -0.24741611  | 0.02692167  |
| UPP1 | CXCL10  | UVM | 0.256172531  | 0.02181163  |
| UPP1 | CXCL11  | UVM | 0.156784309  | 0.164876269 |
| UPP1 | CXCL12  | UVM | 0.108287231  | 0.339010493 |
| UPP1 | CXCL1   | UVM | 0.351926583  | 0.0013683   |
| UPP1 | CXCL13  | UVM | 0.207706452  | 0.064492171 |
| UPP1 | CXCL14  | UVM | 0.171412482  | 0.128433929 |
| UPP1 | CXCL16  | UVM | 0.359086108  | 0.001071523 |
| UPP1 | CXCL17  | UVM | 0.059255412  | 0.601590752 |
| UPP1 | CXCL2   | UVM | 0.223454642  | 0.046321261 |
| UPP1 | CXCL3   | UVM | 0.077228121  | 0.495937375 |
| UPP1 | CXCL5   | UVM | 0.168468749  | 0.13522412  |
| UPP1 | CXCL6   | UVM | 0.220977222  | 0.048861564 |
| UPP1 | CXCL9   | UVM | 0.218995877  | 0.050974774 |
| UPP1 | IL10    | UVM | 0.115381532  | 0.308122135 |
| UPP1 | IL11    | UVM | 0.429889745  | 6.90E-05    |
| UPP1 | IL12A   | UVM | -0.126984559 | 0.261666967 |
| UPP1 | IL12B   | UVM | 0.095225432  | 0.400780009 |
| UPP1 | IL13    | UVM | 0.064960543  | 0.56699311  |
| UPP1 | IL15    | UVM | 0.228879658  | 0.041137991 |
| UPP1 | IL16    | UVM | -0.211211491 | 0.060015844 |
| UPP1 | IL17A   | UVM | NA           | NA          |
| UPP1 | IL17B   | UVM | 0.079658569  | 0.482434895 |
| UPP1 | IL17C   | UVM | 0.010436289  | 0.926794674 |
| UPP1 | IL17D   | UVM | -0.087328985 | 0.441137269 |
| UPP1 | IL17F   | UVM | NA           | NA          |
| UPP1 | IL18    | UVM | 0.245556243  | 0.028128613 |
| UPP1 | IL19    | UVM | 0.038130047  | 0.737021606 |
| UPP1 | IL1A    | UVM | 0.146708569  | 0.194085243 |
| UPP1 | IL1B    | UVM | 0.401200198  | 0.000225858 |
| UPP1 | IL2     | UVM | 0.121613476  | 0.282545269 |
| UPP1 | IL20    | UVM | -0.089149919 | 0.431633677 |
| UPP1 | IL21    | UVM | -0.019491578 | 0.863743813 |

|      |             |      |              |             |
|------|-------------|------|--------------|-------------|
| UPP1 | IL22        | UVM  | NA           | NA          |
| UPP1 | IL24        | UVM  | 0.143016682  | 0.205668941 |
| UPP1 | IL25        | UVM  | -0.215607825 | 0.054761885 |
| UPP1 | IL26        | UVM  | 0.023620437  | 0.83525117  |
| UPP1 | IL27        | UVM  | 0.379447798  | 0.000518039 |
| UPP1 | IL29        | UVM  | 0.14021397   | 0.214785813 |
| UPP1 | IL3         | UVM  | NA           | NA          |
| UPP1 | IL31        | UVM  | NA           | NA          |
| UPP1 | IL32        | UVM  | 0.426605337  | 7.95E-05    |
| UPP1 | IL33        | UVM  | -0.012675568 | 0.911145445 |
| UPP1 | IL34        | UVM  | 0.433716296  | 5.84E-05    |
| UPP1 | IL4         | UVM  | -0.025757967 | 0.820580875 |
| UPP1 | IL5         | UVM  | 0.022439319  | 0.84338194  |
| UPP1 | IL6         | UVM  | 0.382791354  | 0.000457664 |
| UPP1 | IL7         | UVM  | 0.158889438  | 0.159206879 |
| UPP1 | IL8         | UVM  | 0.196998546  | 0.079862456 |
| UPP1 | IL9         | UVM  | NA           | NA          |
| UPP1 | TGFB1       | THYM | 0.335656606  | 0.000178406 |
| UPP1 | TGFB2       | THYM | 0.263487472  | 0.003640803 |
| UPP1 | TGFB3       | THYM | 0.138876068  | 0.130348763 |
| UPP1 | VEGFA       | THYM | 0.127765596  | 0.164328879 |
| UPP1 | VEGFB       | THYM | 0.440975128  | 4.63E-07    |
| UPP1 | VEGFC       | THYM | 0.060013487  | 0.514968415 |
| UPP1 | CCL11       | THYM | 0.46447574   | 9.10E-08    |
| UPP1 | CCL13       | THYM | 0.23468255   | 0.009878657 |
| UPP1 | CCL14       | THYM | 0.345508638  | 0.000111104 |
| UPP1 | CCL14-CCL15 | THYM | -0.056925691 | 0.536862965 |
| UPP1 | CCL15       | THYM | 0.190259381  | 0.037395081 |
| UPP1 | CCL1        | THYM | 0.042607878  | 0.644030796 |
| UPP1 | CCL16       | THYM | 0.091881389  | 0.318236567 |
| UPP1 | CCL17       | THYM | -0.008393911 | 0.927500661 |
| UPP1 | CCL18       | THYM | 0.018567515  | 0.840475464 |
| UPP1 | CCL19       | THYM | 0.2228802    | 0.014411642 |
| UPP1 | CCL20       | THYM | 0.404956687  | 4.48E-06    |
| UPP1 | CCL21       | THYM | 0.399771801  | 6.08E-06    |
| UPP1 | CCL22       | THYM | 0.181002964  | 0.047882737 |
| UPP1 | CCL23       | THYM | 0.499188371  | 6.50E-09    |
| UPP1 | CCL24       | THYM | 0.027439326  | 0.76609046  |
| UPP1 | CCL25       | THYM | -0.268865966 | 0.002984505 |
| UPP1 | CCL26       | THYM | 0.539500239  | 2.04E-10    |
| UPP1 | CCL2        | THYM | 0.39126664   | 9.93E-06    |
| UPP1 | CCL27       | THYM | 0.280210893  | 0.001936684 |
| UPP1 | CCL28       | THYM | -0.276297499 | 0.002252839 |

|      |         |      |              |             |
|------|---------|------|--------------|-------------|
| UPP1 | CCL3    | THYM | 0.406688406  | 4.04E-06    |
| UPP1 | CCL3L1  | THYM | 0.317567601  | 0.000408838 |
| UPP1 | CCL3L3  | THYM | 0.116068724  | 0.206793238 |
| UPP1 | CCL4    | THYM | 0.495393717  | 8.80E-09    |
| UPP1 | CCL4L2  | THYM | 0.312730795  | 0.000505949 |
| UPP1 | CCL5    | THYM | 0.565556185  | 1.69E-11    |
| UPP1 | CCL7    | THYM | 0.311117689  | 0.000542787 |
| UPP1 | CCL8    | THYM | 0.437148699  | 5.97E-07    |
| UPP1 | CROCCL1 | THYM | -0.428965486 | 1.02E-06    |
| UPP1 | CROCCL2 | THYM | -0.098545914 | 0.28424762  |
| UPP1 | CXCL10  | THYM | 0.468742824  | 6.68E-08    |
| UPP1 | CXCL11  | THYM | 0.486760208  | 1.73E-08    |
| UPP1 | CXCL12  | THYM | -0.208660729 | 0.022191468 |
| UPP1 | CXCL1   | THYM | 0.149970408  | 0.1020683   |
| UPP1 | CXCL13  | THYM | 0.507936833  | 3.19E-09    |
| UPP1 | CXCL14  | THYM | 0.245211685  | 0.00694676  |
| UPP1 | CXCL16  | THYM | 0.481620119  | 2.56E-08    |
| UPP1 | CXCL17  | THYM | 0.194266397  | 0.033494405 |
| UPP1 | CXCL2   | THYM | 0.184152841  | 0.044069152 |
| UPP1 | CXCL3   | THYM | -0.198393833 | 0.029841483 |
| UPP1 | CXCL5   | THYM | 0.084549631  | 0.35854255  |
| UPP1 | CXCL6   | THYM | -0.068133519 | 0.459656263 |
| UPP1 | CXCL9   | THYM | 0.40530165   | 4.39E-06    |
| UPP1 | IL10    | THYM | 0.207072873  | 0.0232512   |
| UPP1 | IL11    | THYM | 0.189917622  | 0.03774475  |
| UPP1 | IL12A   | THYM | 0.288776771  | 0.001380422 |
| UPP1 | IL12B   | THYM | 0.066097638  | 0.473207794 |
| UPP1 | IL13    | THYM | 0.143214272  | 0.118649263 |
| UPP1 | IL15    | THYM | 0.300357832  | 0.000858765 |
| UPP1 | IL16    | THYM | -0.358753693 | 5.73E-05    |
| UPP1 | IL17A   | THYM | 0.149099529  | 0.104097303 |
| UPP1 | IL17B   | THYM | 0.489888072  | 1.36E-08    |
| UPP1 | IL17C   | THYM | 0.263680417  | 0.003615183 |
| UPP1 | IL17D   | THYM | 0.036173947  | 0.694876108 |
| UPP1 | IL17F   | THYM | -0.355483664 | 6.77E-05    |
| UPP1 | IL18    | THYM | 0.496861974  | 7.83E-09    |
| UPP1 | IL19    | THYM | -0.030898674 | 0.73761362  |
| UPP1 | IL1A    | THYM | 0.309593611  | 0.000579844 |
| UPP1 | IL1B    | THYM | 0.26324684   | 0.003672983 |
| UPP1 | IL2     | THYM | 0.276647586  | 0.002222765 |
| UPP1 | IL20    | THYM | 0.096637261  | 0.293723841 |
| UPP1 | IL21    | THYM | 0.19187982   | 0.035773965 |
| UPP1 | IL22    | THYM | -0.058904722 | 0.522777284 |

|      |             |      |              |             |
|------|-------------|------|--------------|-------------|
| UPP1 | IL24        | THYM | -0.192659449 | 0.035015344 |
| UPP1 | IL25        | THYM | 0.032771192  | 0.722343606 |
| UPP1 | IL26        | THYM | 0.270368493  | 0.002821283 |
| UPP1 | IL27        | THYM | 0.505542164  | 3.88E-09    |
| UPP1 | IL29        | THYM | 0.314525294  | 0.00046768  |
| UPP1 | IL3         | THYM | 0.015175045  | 0.86933456  |
| UPP1 | IL31        | THYM | 0.147359914  | 0.108244911 |
| UPP1 | IL32        | THYM | 0.349329127  | 9.21E-05    |
| UPP1 | IL33        | THYM | 0.205421566  | 0.024398996 |
| UPP1 | IL34        | THYM | 0.028743111  | 0.755318895 |
| UPP1 | IL4         | THYM | -0.125954052 | 0.170443088 |
| UPP1 | IL5         | THYM | 0.01656936   | 0.857450329 |
| UPP1 | IL6         | THYM | 0.275608765  | 0.002313081 |
| UPP1 | IL7         | THYM | 0.083319265  | 0.365604255 |
| UPP1 | IL8         | THYM | -0.260579997 | 0.004047107 |
| UPP1 | IL9         | THYM | -0.046520292 | 0.613879447 |
| UPP1 | TGFB1       | CHOL | 0.254320081  | 0.134444549 |
| UPP1 | TGFB2       | CHOL | -0.175801183 | 0.3050819   |
| UPP1 | TGFB3       | CHOL | -0.091218301 | 0.596736408 |
| UPP1 | VEGFA       | CHOL | -0.342440665 | 0.04091338  |
| UPP1 | VEGFB       | CHOL | 0.687316345  | 3.65E-06    |
| UPP1 | VEGFC       | CHOL | 0.204606769  | 0.231295143 |
| UPP1 | CCL11       | CHOL | -0.120341298 | 0.484481649 |
| UPP1 | CCL13       | CHOL | 0.136423958  | 0.427559004 |
| UPP1 | CCL14       | CHOL | 0.050074702  | 0.771795721 |
| UPP1 | CCL14-CCL15 | CHOL | -0.0032073   | 0.985188384 |
| UPP1 | CCL15       | CHOL | -0.122496173 | 0.47663466  |
| UPP1 | CCL1        | CHOL | 0.032270937  | 0.851785512 |
| UPP1 | CCL16       | CHOL | -0.116705089 | 0.497873027 |
| UPP1 | CCL17       | CHOL | 0.215431425  | 0.207002818 |
| UPP1 | CCL18       | CHOL | 0.130052407  | 0.449652086 |
| UPP1 | CCL19       | CHOL | 0.15522156   | 0.366018177 |
| UPP1 | CCL20       | CHOL | 0.006080201  | 0.971925054 |
| UPP1 | CCL21       | CHOL | 0.288093459  | 0.088400692 |
| UPP1 | CCL22       | CHOL | 0.179594754  | 0.294596637 |
| UPP1 | CCL23       | CHOL | 0.113159374  | 0.511109916 |
| UPP1 | CCL24       | CHOL | -0.047377078 | 0.783789243 |
| UPP1 | CCL25       | CHOL | -0.017658338 | 0.918583087 |
| UPP1 | CCL26       | CHOL | -0.039594826 | 0.818655566 |
| UPP1 | CCL2        | CHOL | 0.288234216  | 0.088238295 |
| UPP1 | CCL27       | CHOL | 0.037993255  | 0.825876046 |
| UPP1 | CCL28       | CHOL | -0.173221961 | 0.312344091 |
| UPP1 | CCL3        | CHOL | 0.127091108  | 0.460126733 |

|      |         |      |              |             |
|------|---------|------|--------------|-------------|
| UPP1 | CCL3L1  | CHOL | 0.2662439    | 0.116515841 |
| UPP1 | CCL3L3  | CHOL | -0.15867079  | 0.355330029 |
| UPP1 | CCL4    | CHOL | 0.23956069   | 0.159360824 |
| UPP1 | CCL4L2  | CHOL | 0.233163792  | 0.171137035 |
| UPP1 | CCL5    | CHOL | 0.308179484  | 0.067457515 |
| UPP1 | CCL7    | CHOL | -0.078433839 | 0.649327788 |
| UPP1 | CCL8    | CHOL | -0.117789551 | 0.493859609 |
| UPP1 | CROCCL1 | CHOL | -0.193432193 | 0.258328914 |
| UPP1 | CROCCL2 | CHOL | -0.234858093 | 0.167959109 |
| UPP1 | CXCL10  | CHOL | 0.157311964  | 0.359517968 |
| UPP1 | CXCL11  | CHOL | 0.171105105  | 0.318384996 |
| UPP1 | CXCL12  | CHOL | 0.196678633  | 0.250268458 |
| UPP1 | CXCL1   | CHOL | 0.074694628  | 0.665046107 |
| UPP1 | CXCL13  | CHOL | 0.114214394  | 0.507153051 |
| UPP1 | CXCL14  | CHOL | 0.254986589  | 0.133391604 |
| UPP1 | CXCL16  | CHOL | -0.128579232 | 0.45484675  |
| UPP1 | CXCL17  | CHOL | 0.044597938  | 0.796196674 |
| UPP1 | CXCL2   | CHOL | 0.091368554  | 0.596129456 |
| UPP1 | CXCL3   | CHOL | -0.00724612  | 0.966544267 |
| UPP1 | CXCL5   | CHOL | -0.201313663 | 0.239053941 |
| UPP1 | CXCL6   | CHOL | 0.133474437  | 0.437710369 |
| UPP1 | CXCL9   | CHOL | 0.173742911  | 0.310868584 |
| UPP1 | IL10    | CHOL | 0.332874288  | 0.047284945 |
| UPP1 | IL11    | CHOL | -0.082365484 | 0.63295997  |
| UPP1 | IL12A   | CHOL | 0.074352107  | 0.666493127 |
| UPP1 | IL12B   | CHOL | 0.136825227  | 0.426188153 |
| UPP1 | IL13    | CHOL | -0.044437488 | 0.796914539 |
| UPP1 | IL15    | CHOL | 0.324017466  | 0.053872079 |
| UPP1 | IL16    | CHOL | 0.199713729  | 0.242886065 |
| UPP1 | IL17A   | CHOL | 0.000735707  | 0.996602257 |
| UPP1 | IL17B   | CHOL | 0.004798102  | 0.977843417 |
| UPP1 | IL17C   | CHOL | 0.144361457  | 0.40090098  |
| UPP1 | IL17D   | CHOL | 0.081466373  | 0.636688309 |
| UPP1 | IL17F   | CHOL | 0.111489531  | 0.51740401  |
| UPP1 | IL18    | CHOL | 0.005876212  | 0.972866607 |
| UPP1 | IL19    | CHOL | -0.019585647 | 0.909731407 |
| UPP1 | IL1A    | CHOL | -0.042817244 | 0.804172707 |
| UPP1 | IL1B    | CHOL | 0.146569276  | 0.393659369 |
| UPP1 | IL2     | CHOL | 0.155015262  | 0.366663445 |
| UPP1 | IL20    | CHOL | -0.28347571  | 0.093856992 |
| UPP1 | IL21    | CHOL | -0.247875635 | 0.14494384  |
| UPP1 | IL22    | CHOL | 0.190904901  | 0.264721512 |
| UPP1 | IL24    | CHOL | 0.110928033  | 0.51952902  |



|      |             |      |              |             |
|------|-------------|------|--------------|-------------|
| UPP1 | IL25        | CHOL | -0.038750685 | 0.822459475 |
| UPP1 | IL26        | CHOL | 0.001112673  | 0.994861323 |
| UPP1 | IL27        | CHOL | -0.027357868 | 0.874154506 |
| UPP1 | IL29        | CHOL | -0.060488774 | 0.726004549 |
| UPP1 | IL3         | CHOL | -0.099650498 | 0.563099164 |
| UPP1 | IL31        | CHOL | NA           | NA          |
| UPP1 | IL32        | CHOL | 0.417050337  | 0.011390778 |
| UPP1 | IL33        | CHOL | -0.144057245 | 0.401904743 |
| UPP1 | IL34        | CHOL | 0.085929407  | 0.618269634 |
| UPP1 | IL4         | CHOL | 0.032640519  | 0.850107194 |
| UPP1 | IL5         | CHOL | 0.112895346  | 0.512102561 |
| UPP1 | IL6         | CHOL | 0.028094476  | 0.870794199 |
| UPP1 | IL7         | CHOL | 0.307531485  | 0.068065883 |
| UPP1 | IL8         | CHOL | -0.044660937 | 0.795914856 |
| UPP1 | IL9         | CHOL | -0.294317998 | 0.081436226 |
| UPP1 | TGFB1       | ESCA | 0.528956059  | 1.18E-14    |
| UPP1 | TGFB2       | ESCA | -0.001342377 | 0.985571198 |
| UPP1 | TGFB3       | ESCA | 0.188382517  | 0.010440106 |
| UPP1 | VEGFA       | ESCA | 0.145932634  | 0.048083338 |
| UPP1 | VEGFB       | ESCA | 0.230772306  | 0.001623414 |
| UPP1 | VEGFC       | ESCA | 0.305900582  | 2.41E-05    |
| UPP1 | CCL11       | ESCA | -0.034566684 | 0.641337759 |
| UPP1 | CCL13       | ESCA | 0.202708629  | 0.005786426 |
| UPP1 | CCL14       | ESCA | -0.241778038 | 0.000944756 |
| UPP1 | CCL14-CCL15 | ESCA | -0.271414911 | 0.000193955 |
| UPP1 | CCL15       | ESCA | -0.270419037 | 0.000205177 |
| UPP1 | CCL1        | ESCA | 0.102341351  | 0.166849647 |
| UPP1 | CCL16       | ESCA | -0.089065326 | 0.229247869 |
| UPP1 | CCL17       | ESCA | -0.003117982 | 0.966493727 |
| UPP1 | CCL18       | ESCA | 0.156728534  | 0.033617568 |
| UPP1 | CCL19       | ESCA | -0.134327737 | 0.069073184 |
| UPP1 | CCL20       | ESCA | 0.001341553  | 0.985580056 |
| UPP1 | CCL21       | ESCA | 0.212588404  | 0.003764745 |
| UPP1 | CCL22       | ESCA | 0.155274899  | 0.035319188 |
| UPP1 | CCL23       | ESCA | 0.016125211  | 0.828008453 |
| UPP1 | CCL24       | ESCA | 0.042654813  | 0.565347595 |
| UPP1 | CCL25       | ESCA | -0.249954075 | 0.000621813 |
| UPP1 | CCL26       | ESCA | 0.235081574  | 0.001317191 |
| UPP1 | CCL2        | ESCA | -0.044153479 | 0.551752769 |
| UPP1 | CCL27       | ESCA | 0.529692234  | 1.06E-14    |
| UPP1 | CCL28       | ESCA | -0.279895648 | 0.000119079 |
| UPP1 | CCL3        | ESCA | 0.231304547  | 0.00158236  |
| UPP1 | CCL3L1      | ESCA | 0.065785471  | 0.374950848 |

|      |         |      |              |             |
|------|---------|------|--------------|-------------|
| UPP1 | CCL3L3  | ESCA | 0.04805831   | 0.517097132 |
| UPP1 | CCL4    | ESCA | 0.136393384  | 0.064869169 |
| UPP1 | CCL4L2  | ESCA | 0.10082402   | 0.173262263 |
| UPP1 | CCL5    | ESCA | 0.070085898  | 0.344467101 |
| UPP1 | CCL7    | ESCA | 0.254294118  | 0.000495188 |
| UPP1 | CCL8    | ESCA | 0.139290712  | 0.059327527 |
| UPP1 | CROCCL1 | ESCA | -0.381570982 | 9.08E-08    |
| UPP1 | CROCCL2 | ESCA | -0.244530724 | 0.000821923 |
| UPP1 | CXCL10  | ESCA | 0.086884724  | 0.240896391 |
| UPP1 | CXCL11  | ESCA | 0.027248873  | 0.71349148  |
| UPP1 | CXCL12  | ESCA | -0.222100063 | 0.002444581 |
| UPP1 | CXCL1   | ESCA | 0.084797653  | 0.252426608 |
| UPP1 | CXCL13  | ESCA | -0.003453815 | 0.962887277 |
| UPP1 | CXCL14  | ESCA | 0.391819413  | 3.79E-08    |
| UPP1 | CXCL16  | ESCA | -0.29373409  | 5.19E-05    |
| UPP1 | CXCL17  | ESCA | -0.00711681  | 0.923615527 |
| UPP1 | CXCL2   | ESCA | -0.200632039 | 0.006318425 |
| UPP1 | CXCL3   | ESCA | -0.160094314 | 0.029942713 |
| UPP1 | CXCL5   | ESCA | 0.054391724  | 0.463363086 |
| UPP1 | CXCL6   | ESCA | 0.084137258  | 0.256153199 |
| UPP1 | CXCL9   | ESCA | 0.026747615  | 0.718537383 |
| UPP1 | IL10    | ESCA | 0.055434012  | 0.454825697 |
| UPP1 | IL11    | ESCA | 0.274145823  | 0.000166045 |
| UPP1 | IL12A   | ESCA | -0.191150375 | 0.009343265 |
| UPP1 | IL12B   | ESCA | -0.117327883 | 0.112705237 |
| UPP1 | IL13    | ESCA | 0.011792647  | 0.873764485 |
| UPP1 | IL15    | ESCA | 0.008260222  | 0.911390011 |
| UPP1 | IL16    | ESCA | -0.017474956 | 0.813863809 |
| UPP1 | IL17A   | ESCA | -0.137754086 | 0.062215998 |
| UPP1 | IL17B   | ESCA | 0.021849563  | 0.76845436  |
| UPP1 | IL17C   | ESCA | -0.108957699 | 0.140942877 |
| UPP1 | IL17D   | ESCA | -0.132720528 | 0.072495519 |
| UPP1 | IL17F   | ESCA | -0.011877377 | 0.872865102 |
| UPP1 | IL18    | ESCA | 0.283649023  | 9.55E-05    |
| UPP1 | IL19    | ESCA | 0.073002037  | 0.324715352 |
| UPP1 | IL1A    | ESCA | 0.67582483   | 6.68E-26    |
| UPP1 | IL1B    | ESCA | 0.312486513  | 1.57E-05    |
| UPP1 | IL2     | ESCA | -0.093554867 | 0.206530247 |
| UPP1 | IL20    | ESCA | 0.441717635  | 3.46E-10    |
| UPP1 | IL21    | ESCA | -0.02779346  | 0.708023464 |
| UPP1 | IL22    | ESCA | 0.062507228  | 0.399264372 |
| UPP1 | IL24    | ESCA | 0.367168173  | 2.95E-07    |
| UPP1 | IL25    | ESCA | -0.130200227 | 0.078138196 |

|      |             |      |              |             |
|------|-------------|------|--------------|-------------|
| UPP1 | IL26        | ESCA | -0.027646529 | 0.709497286 |
| UPP1 | IL27        | ESCA | -0.048877655 | 0.509969964 |
| UPP1 | IL29        | ESCA | 0.165736075  | 0.024550347 |
| UPP1 | IL3         | ESCA | -0.080299074 | 0.278561044 |
| UPP1 | IL31        | ESCA | 0.035432596  | 0.633002067 |
| UPP1 | IL32        | ESCA | -0.154738624 | 0.035965093 |
| UPP1 | IL33        | ESCA | -0.106215936 | 0.151279385 |
| UPP1 | IL34        | ESCA | -0.071662651 | 0.333694775 |
| UPP1 | IL4         | ESCA | -0.011768552 | 0.874020268 |
| UPP1 | IL5         | ESCA | -0.147115377 | 0.046280383 |
| UPP1 | IL6         | ESCA | 0.095207765  | 0.198588893 |
| UPP1 | IL7         | ESCA | -0.204142057 | 0.00544294  |
| UPP1 | IL8         | ESCA | 0.180400963  | 0.014264169 |
| UPP1 | IL9         | ESCA | 0.056179922  | 0.448770297 |
| UPP1 | TGFB1       | STAD | 0.202000089  | 3.39E-05    |
| UPP1 | TGFB2       | STAD | -0.085085878 | 0.083408318 |
| UPP1 | TGFB3       | STAD | -0.072702831 | 0.139258151 |
| UPP1 | VEGFA       | STAD | 0.144527508  | 0.003168738 |
| UPP1 | VEGFB       | STAD | 0.122572272  | 0.012458484 |
| UPP1 | VEGFC       | STAD | 0.044263918  | 0.368415329 |
| UPP1 | CCL11       | STAD | 0.046366871  | 0.346078589 |
| UPP1 | CCL13       | STAD | 0.123305021  | 0.011939144 |
| UPP1 | CCL14       | STAD | -0.024279916 | 0.621871048 |
| UPP1 | CCL14-CCL15 | STAD | -0.019383758 | 0.693785461 |
| UPP1 | CCL15       | STAD | 0.034942826  | 0.47776042  |
| UPP1 | CCL1        | STAD | 0.092578491  | 0.059520727 |
| UPP1 | CCL16       | STAD | -0.080317734 | 0.10227942  |
| UPP1 | CCL17       | STAD | 0.055702257  | 0.25755128  |
| UPP1 | CCL18       | STAD | 0.205406493  | 2.48E-05    |
| UPP1 | CCL19       | STAD | -0.096965997 | 0.048376814 |
| UPP1 | CCL20       | STAD | 0.188863958  | 0.000108507 |
| UPP1 | CCL21       | STAD | 0.003665792  | 0.940650052 |
| UPP1 | CCL22       | STAD | 0.073076646  | 0.13723102  |
| UPP1 | CCL23       | STAD | 0.075148825  | 0.126402752 |
| UPP1 | CCL24       | STAD | -0.114231238 | 0.019929515 |
| UPP1 | CCL25       | STAD | -0.04067799  | 0.408511258 |
| UPP1 | CCL26       | STAD | 0.139480475  | 0.004416234 |
| UPP1 | CCL2        | STAD | 0.097554916  | 0.047023334 |
| UPP1 | CCL27       | STAD | 0.1235627    | 0.01176111  |
| UPP1 | CCL28       | STAD | 0.2227407    | 4.61E-06    |
| UPP1 | CCL3        | STAD | 0.176143527  | 0.000311283 |
| UPP1 | CCL3L1      | STAD | 0.105612858  | 0.031474061 |
| UPP1 | CCL3L3      | STAD | -0.073112516 | 0.137037704 |

|      |         |      |              |             |
|------|---------|------|--------------|-------------|
| UPP1 | CCL4    | STAD | 0.108582359  | 0.026976177 |
| UPP1 | CCL4L2  | STAD | 0.071580888  | 0.145480248 |
| UPP1 | CCL5    | STAD | -0.032361697 | 0.510896988 |
| UPP1 | CCL7    | STAD | 0.218564586  | 7.01E-06    |
| UPP1 | CCL8    | STAD | 0.119653879  | 0.014729973 |
| UPP1 | CROCCL1 | STAD | -0.154744478 | 0.001567202 |
| UPP1 | CROCCL2 | STAD | -0.150295361 | 0.002140802 |
| UPP1 | CXCL10  | STAD | -0.003110386 | 0.949629213 |
| UPP1 | CXCL11  | STAD | 0.030277889  | 0.538496545 |
| UPP1 | CXCL12  | STAD | -0.117120556 | 0.016988763 |
| UPP1 | CXCL1   | STAD | 0.241977963  | 6.07E-07    |
| UPP1 | CXCL13  | STAD | -0.074051526 | 0.132051118 |
| UPP1 | CXCL14  | STAD | -0.091102092 | 0.06371767  |
| UPP1 | CXCL16  | STAD | 0.177392428  | 0.000281558 |
| UPP1 | CXCL17  | STAD | 0.08181056   | 0.096038142 |
| UPP1 | CXCL2   | STAD | 0.128918073  | 0.008555586 |
| UPP1 | CXCL3   | STAD | 0.130991264  | 0.007540779 |
| UPP1 | CXCL5   | STAD | 0.066070294  | 0.179154557 |
| UPP1 | CXCL6   | STAD | 0.248880957  | 2.81E-07    |
| UPP1 | CXCL9   | STAD | -0.071760103 | 0.144472365 |
| UPP1 | IL10    | STAD | -0.050464537 | 0.305083206 |
| UPP1 | IL11    | STAD | 0.284795184  | 3.48E-09    |
| UPP1 | IL12A   | STAD | 0.011885956  | 0.809234631 |
| UPP1 | IL12B   | STAD | -0.080579948 | 0.101160446 |
| UPP1 | IL13    | STAD | 0.117552346  | 0.016583582 |
| UPP1 | IL15    | STAD | -0.004749205 | 0.923157322 |
| UPP1 | IL16    | STAD | -0.173066506 | 0.000397467 |
| UPP1 | IL17A   | STAD | 0.127866772  | 0.009115288 |
| UPP1 | IL17B   | STAD | 0.047529042  | 0.33411138  |
| UPP1 | IL17C   | STAD | 0.267506027  | 3.13E-08    |
| UPP1 | IL17D   | STAD | -0.189698712 | 0.000101006 |
| UPP1 | IL17F   | STAD | -0.006720082 | 0.891436216 |
| UPP1 | IL18    | STAD | 0.18366795   | 0.000168311 |
| UPP1 | IL19    | STAD | 0.071881208  | 0.143794305 |
| UPP1 | IL1A    | STAD | 0.37539174   | 2.46E-15    |
| UPP1 | IL1B    | STAD | 0.253170352  | 1.72E-07    |
| UPP1 | IL2     | STAD | -0.069040522 | 0.160349889 |
| UPP1 | IL20    | STAD | 0.169270468  | 0.000534344 |
| UPP1 | IL21    | STAD | -0.032140672 | 0.513789103 |
| UPP1 | IL22    | STAD | -0.031837498 | 0.517769899 |
| UPP1 | IL24    | STAD | 0.182311585  | 0.000188382 |
| UPP1 | IL25    | STAD | -0.01868277  | 0.704329876 |
| UPP1 | IL26    | STAD | 0.034126114  | 0.488116993 |

|      |      |      |              |             |
|------|------|------|--------------|-------------|
| UPP1 | IL27 | STAD | 0.064543462  | 0.189434783 |
| UPP1 | IL29 | STAD | 0.039734882  | 0.419471526 |
| UPP1 | IL3  | STAD | -0.013472372 | 0.784363069 |
| UPP1 | IL31 | STAD | -0.076778844 | 0.118360508 |
| UPP1 | IL32 | STAD | 0.150558588  | 0.002102141 |
| UPP1 | IL33 | STAD | -0.085316667 | 0.082571494 |
| UPP1 | IL34 | STAD | 0.015206205  | 0.757429954 |
| UPP1 | IL4  | STAD | 0.038365172  | 0.435692522 |
| UPP1 | IL5  | STAD | -0.043911222 | 0.372247205 |
| UPP1 | IL6  | STAD | 0.14111053   | 0.003971769 |
| UPP1 | IL7  | STAD | -0.05944112  | 0.226922681 |
| UPP1 | IL8  | STAD | 0.223027639  | 4.48E-06    |
| UPP1 | IL9  | STAD | -0.081732503 | 0.096356781 |

Sheet3: Correlation between PSPGs and checkpoints in different car

| Gene | Checkpoints | Cancer | Correlation  |
|------|-------------|--------|--------------|
| UPP1 | CD274       | ACC    | 0.300481801  |
| UPP1 | PDCD1LG2    | ACC    | 0.263331073  |
| UPP1 | CD276       | ACC    | 0.348511114  |
| UPP1 | VTCN1       | ACC    | -0.024923392 |
| UPP1 | BTLA        | ACC    | 0.234023455  |
| UPP1 | CD70        | ACC    | 0.273408375  |
| UPP1 | CD47        | ACC    | -0.097634473 |
| UPP1 | LGALS9      | ACC    | 0.242434972  |
| UPP1 | SIGLEC15    | ACC    | 0.099149653  |
| UPP1 | CD274       | BLCA   | 0.231765247  |
| UPP1 | PDCD1LG2    | BLCA   | 0.378083342  |
| UPP1 | CD276       | BLCA   | 0.136307994  |
| UPP1 | VTCN1       | BLCA   | -0.078957379 |
| UPP1 | BTLA        | BLCA   | 0.196674715  |
| UPP1 | CD70        | BLCA   | 0.28903059   |
| UPP1 | CD47        | BLCA   | 0.120236617  |
| UPP1 | LGALS9      | BLCA   | 0.190105587  |
| UPP1 | SIGLEC15    | BLCA   | -0.148301871 |
| UPP1 | CD274       | DLBC   | -0.11117779  |
| UPP1 | PDCD1LG2    | DLBC   | -0.035038429 |
| UPP1 | CD276       | DLBC   | 0.646001024  |
| UPP1 | VTCN1       | DLBC   | 0.051223966  |
| UPP1 | BTLA        | DLBC   | -0.497513264 |
| UPP1 | CD70        | DLBC   | 0.203980366  |
| UPP1 | CD47        | DLBC   | -0.231391236 |
| UPP1 | LGALS9      | DLBC   | 0.208424626  |
| UPP1 | SIGLEC15    | DLBC   | 0.2523202    |
| UPP1 | CD274       | UCEC   | 0.179764017  |
| UPP1 | PDCD1LG2    | UCEC   | 0.250386464  |
| UPP1 | CD276       | UCEC   | 0.081613292  |
| UPP1 | VTCN1       | UCEC   | 0.041005049  |
| UPP1 | BTLA        | UCEC   | 0.026486122  |
| UPP1 | CD70        | UCEC   | 0.291527606  |
| UPP1 | CD47        | UCEC   | -0.006510646 |
| UPP1 | LGALS9      | UCEC   | 0.240523455  |
| UPP1 | SIGLEC15    | UCEC   | 0.176143423  |
| UPP1 | CD274       | SKCM   | -0.014013236 |
| UPP1 | PDCD1LG2    | SKCM   | -0.119294299 |
| UPP1 | CD276       | SKCM   | 0.414032089  |
| UPP1 | VTCN1       | SKCM   | -0.184839493 |
| UPP1 | BTLA        | SKCM   | -0.128760581 |

|      |          |      |              |
|------|----------|------|--------------|
| UPP1 | CD70     | SKCM | -0.037803327 |
| UPP1 | CD47     | SKCM | -0.226743162 |
| UPP1 | LGALS9   | SKCM | 0.001719335  |
| UPP1 | SIGLEC15 | SKCM | 0.22545058   |
| UPP1 | CD274    | HNSC | 0.006451016  |
| UPP1 | PDCD1LG2 | HNSC | 0.090808026  |
| UPP1 | CD276    | HNSC | 0.212468424  |
| UPP1 | VTCN1    | HNSC | -0.270831914 |
| UPP1 | BTLA     | HNSC | -0.327976486 |
| UPP1 | CD70     | HNSC | -0.048624059 |
| UPP1 | CD47     | HNSC | 0.28794822   |
| UPP1 | LGALS9   | HNSC | -0.3616229   |
| UPP1 | SIGLEC15 | HNSC | -0.15817271  |
| UPP1 | CD274    | PRAD | 0.165742606  |
| UPP1 | PDCD1LG2 | PRAD | 0.368466772  |
| UPP1 | CD276    | PRAD | -0.041702983 |
| UPP1 | VTCN1    | PRAD | 0.322450464  |
| UPP1 | BTLA     | PRAD | 0.133990731  |
| UPP1 | CD70     | PRAD | 0.335856896  |
| UPP1 | CD47     | PRAD | 0.022819788  |
| UPP1 | LGALS9   | PRAD | 0.60526507   |
| UPP1 | SIGLEC15 | PRAD | 0.138987926  |
| UPP1 | CD274    | KIRP | -0.064384461 |
| UPP1 | PDCD1LG2 | KIRP | 0.126057582  |
| UPP1 | CD276    | KIRP | 0.220913146  |
| UPP1 | VTCN1    | KIRP | 0.102190696  |
| UPP1 | BTLA     | KIRP | -0.031347561 |
| UPP1 | CD70     | KIRP | -0.040905777 |
| UPP1 | CD47     | KIRP | -0.046560615 |
| UPP1 | LGALS9   | KIRP | 0.251429089  |
| UPP1 | SIGLEC15 | KIRP | 0.130947349  |
| UPP1 | CD274    | PAAD | -0.057380846 |
| UPP1 | PDCD1LG2 | PAAD | 0.040156779  |
| UPP1 | CD276    | PAAD | 0.386060275  |
| UPP1 | VTCN1    | PAAD | 0.035913571  |
| UPP1 | BTLA     | PAAD | -0.066462459 |
| UPP1 | CD70     | PAAD | 0.385003015  |
| UPP1 | CD47     | PAAD | 0.094731887  |
| UPP1 | LGALS9   | PAAD | 0.383672625  |
| UPP1 | SIGLEC15 | PAAD | 0.165688796  |
| UPP1 | CD274    | SARC | 0.285230574  |
| UPP1 | PDCD1LG2 | SARC | 0.407770573  |
| UPP1 | CD276    | SARC | 0.191617576  |

|      |          |       |              |
|------|----------|-------|--------------|
| UPP1 | VTCN1    | SARC  | 0.004303884  |
| UPP1 | BTLA     | SARC  | 0.311487375  |
| UPP1 | CD70     | SARC  | 0.447487907  |
| UPP1 | CD47     | SARC  | 0.204882267  |
| UPP1 | LGALS9   | SARC  | 0.529674491  |
| UPP1 | SIGLEC15 | SARC  | 0.395835934  |
| UPP1 | CD274    | CECSC | 0.244981796  |
| UPP1 | PDCD1LG2 | CECSC | 0.354469232  |
| UPP1 | CD276    | CECSC | 0.164501732  |
| UPP1 | VTCN1    | CECSC | -0.375272401 |
| UPP1 | BTLA     | CECSC | 0.011374099  |
| UPP1 | CD70     | CECSC | 0.3667908    |
| UPP1 | CD47     | CECSC | 0.229489039  |
| UPP1 | LGALS9   | CECSC | -0.080306822 |
| UPP1 | SIGLEC15 | CECSC | -0.023466674 |
| UPP1 | CD274    | COAD  | 0.302248752  |
| UPP1 | PDCD1LG2 | COAD  | 0.243697828  |
| UPP1 | CD276    | COAD  | 0.251233316  |
| UPP1 | VTCN1    | COAD  | -0.04193595  |
| UPP1 | BTLA     | COAD  | 0.093579642  |
| UPP1 | CD70     | COAD  | 0.352697565  |
| UPP1 | CD47     | COAD  | -0.001745812 |
| UPP1 | LGALS9   | COAD  | 0.065953968  |
| UPP1 | SIGLEC15 | COAD  | 0.189113483  |
| UPP1 | CD274    | LUSC  | 0.061350369  |
| UPP1 | PDCD1LG2 | LUSC  | 0.084379882  |
| UPP1 | CD276    | LUSC  | 0.124218072  |
| UPP1 | VTCN1    | LUSC  | -0.084554137 |
| UPP1 | BTLA     | LUSC  | -0.080665621 |
| UPP1 | CD70     | LUSC  | 0.067530984  |
| UPP1 | CD47     | LUSC  | 0.218184408  |
| UPP1 | LGALS9   | LUSC  | -0.089418337 |
| UPP1 | SIGLEC15 | LUSC  | 0.126821506  |
| UPP1 | CD274    | READ  | 0.053008685  |
| UPP1 | PDCD1LG2 | READ  | 0.295529734  |
| UPP1 | CD276    | READ  | 0.340875447  |
| UPP1 | VTCN1    | READ  | -0.069757433 |
| UPP1 | BTLA     | READ  | -0.051714668 |
| UPP1 | CD70     | READ  | 0.233107763  |
| UPP1 | CD47     | READ  | -0.214394876 |
| UPP1 | LGALS9   | READ  | 0.135913385  |
| UPP1 | SIGLEC15 | READ  | 0.147665091  |
| UPP1 | CD274    | KIRC  | -0.128426714 |



|      |          |      |              |
|------|----------|------|--------------|
| UPP1 | PDCD1LG2 | KIRC | -0.216083352 |
| UPP1 | CD276    | KIRC | 0.251843331  |
| UPP1 | VTCN1    | KIRC | 0.050051633  |
| UPP1 | BTLA     | KIRC | -0.146793713 |
| UPP1 | CD70     | KIRC | -0.149652155 |
| UPP1 | CD47     | KIRC | 0.001182961  |
| UPP1 | LGALS9   | KIRC | 0.066145021  |
| UPP1 | SIGLEC15 | KIRC | 0.358341449  |
| UPP1 | CD274    | LIHC | 0.063611679  |
| UPP1 | PDCD1LG2 | LIHC | 0.187041768  |
| UPP1 | CD276    | LIHC | 0.319610107  |
| UPP1 | VTCN1    | LIHC | 0.20667143   |
| UPP1 | BTLA     | LIHC | 0.04663299   |
| UPP1 | CD70     | LIHC | 0.400583105  |
| UPP1 | CD47     | LIHC | 0.243589419  |
| UPP1 | LGALS9   | LIHC | 0.490361192  |
| UPP1 | SIGLEC15 | LIHC | -0.059929402 |
| UPP1 | CD274    | BRCA | 0.189896926  |
| UPP1 | PDCD1LG2 | BRCA | 0.372627935  |
| UPP1 | CD276    | BRCA | 0.346666716  |
| UPP1 | VTCN1    | BRCA | 0.115891079  |
| UPP1 | BTLA     | BRCA | 0.251899874  |
| UPP1 | CD70     | BRCA | 0.463377834  |
| UPP1 | CD47     | BRCA | 0.157914712  |
| UPP1 | LGALS9   | BRCA | 0.452472767  |
| UPP1 | SIGLEC15 | BRCA | -0.053180226 |
| UPP1 | CD274    | OV   | 0.244281664  |
| UPP1 | PDCD1LG2 | OV   | 0.427757121  |
| UPP1 | CD276    | OV   | 0.07894458   |
| UPP1 | VTCN1    | OV   | 0.327281193  |
| UPP1 | BTLA     | OV   | -0.109345721 |
| UPP1 | CD70     | OV   | 0.540226948  |
| UPP1 | CD47     | OV   | 0.257681611  |
| UPP1 | LGALS9   | OV   | 0.260684294  |
| UPP1 | SIGLEC15 | OV   | 0.207247923  |
| UPP1 | CD274    | UCS  | 0.377865099  |
| UPP1 | PDCD1LG2 | UCS  | 0.309451564  |
| UPP1 | CD276    | UCS  | 0.146658632  |
| UPP1 | VTCN1    | UCS  | 0.320146178  |
| UPP1 | BTLA     | UCS  | 0.202460806  |
| UPP1 | CD70     | UCS  | 0.253630002  |
| UPP1 | CD47     | UCS  | 0.288447691  |
| UPP1 | LGALS9   | UCS  | 0.529043312  |

|      |          |      |              |
|------|----------|------|--------------|
| UPP1 | SIGLEC15 | UCS  | 0.441646953  |
| UPP1 | CD274    | GBM  | 0.33709359   |
| UPP1 | PDCD1LG2 | GBM  | 0.498550418  |
| UPP1 | CD276    | GBM  | 0.326968665  |
| UPP1 | VTCN1    | GBM  | -0.16441625  |
| UPP1 | BTLA     | GBM  | 0.165347895  |
| UPP1 | CD70     | GBM  | 0.500377663  |
| UPP1 | CD47     | GBM  | 0.455488645  |
| UPP1 | LGALS9   | GBM  | 0.342139165  |
| UPP1 | SIGLEC15 | GBM  | 0.154875692  |
| UPP1 | CD274    | KICH | -0.258698626 |
| UPP1 | PDCD1LG2 | KICH | -0.234198304 |
| UPP1 | CD276    | KICH | 0.243270081  |
| UPP1 | VTCN1    | KICH | -0.351154086 |
| UPP1 | BTLA     | KICH | 0.291330282  |
| UPP1 | CD70     | KICH | -0.046324604 |
| UPP1 | CD47     | KICH | 0.095392958  |
| UPP1 | LGALS9   | KICH | 0.026037396  |
| UPP1 | SIGLEC15 | KICH | 0.251438932  |
| UPP1 | CD274    | THCA | 0.336157412  |
| UPP1 | PDCD1LG2 | THCA | 0.359997584  |
| UPP1 | CD276    | THCA | 0.64219163   |
| UPP1 | VTCN1    | THCA | 0.589445593  |
| UPP1 | BTLA     | THCA | 0.187162682  |
| UPP1 | CD70     | THCA | 0.574821841  |
| UPP1 | CD47     | THCA | 0.391722335  |
| UPP1 | LGALS9   | THCA | 0.396063288  |
| UPP1 | SIGLEC15 | THCA | 0.617555379  |
| UPP1 | CD274    | LGG  | 0.36334933   |
| UPP1 | PDCD1LG2 | LGG  | 0.585874125  |
| UPP1 | CD276    | LGG  | 0.501682096  |
| UPP1 | VTCN1    | LGG  | -0.212587172 |
| UPP1 | BTLA     | LGG  | 0.332171221  |
| UPP1 | CD70     | LGG  | 0.362529387  |
| UPP1 | CD47     | LGG  | -0.036613882 |
| UPP1 | LGALS9   | LGG  | 0.543865365  |
| UPP1 | SIGLEC15 | LGG  | 0.158911074  |
| UPP1 | CD274    | LUAD | 0.363785565  |
| UPP1 | PDCD1LG2 | LUAD | 0.274974461  |
| UPP1 | CD276    | LUAD | 0.218923052  |
| UPP1 | VTCN1    | LUAD | 0.012013339  |
| UPP1 | BTLA     | LUAD | 0.029910797  |
| UPP1 | CD70     | LUAD | 0.331997308  |

|      |          |      |              |
|------|----------|------|--------------|
| UPP1 | CD47     | LUAD | 0.203216657  |
| UPP1 | LGALS9   | LUAD | 0.262644472  |
| UPP1 | SIGLEC15 | LUAD | 0.240821256  |
| UPP1 | CD274    | MESO | 0.35225409   |
| UPP1 | PDCD1LG2 | MESO | 0.392521114  |
| UPP1 | CD276    | MESO | 0.188852082  |
| UPP1 | VTCN1    | MESO | -0.010493836 |
| UPP1 | BTLA     | MESO | 0.26503947   |
| UPP1 | CD70     | MESO | 0.149254459  |
| UPP1 | CD47     | MESO | 0.012241377  |
| UPP1 | LGALS9   | MESO | 0.420981233  |
| UPP1 | SIGLEC15 | MESO | -0.071765099 |
| UPP1 | CD274    | PCPG | -0.044928633 |
| UPP1 | PDCD1LG2 | PCPG | 0.178776492  |
| UPP1 | CD276    | PCPG | 0.384274075  |
| UPP1 | VTCN1    | PCPG | -0.050877684 |
| UPP1 | BTLA     | PCPG | 0.171621332  |
| UPP1 | CD70     | PCPG | 0.296057295  |
| UPP1 | CD47     | PCPG | -0.066776371 |
| UPP1 | LGALS9   | PCPG | 0.478917887  |
| UPP1 | SIGLEC15 | PCPG | 0.11504353   |
| UPP1 | CD274    | TGCT | 0.255060848  |
| UPP1 | PDCD1LG2 | TGCT | 0.234163693  |
| UPP1 | CD276    | TGCT | -0.419906465 |
| UPP1 | VTCN1    | TGCT | -0.5228997   |
| UPP1 | BTLA     | TGCT | 0.719728191  |
| UPP1 | CD70     | TGCT | 0.699037783  |
| UPP1 | CD47     | TGCT | -0.236409852 |
| UPP1 | LGALS9   | TGCT | 0.166775913  |
| UPP1 | SIGLEC15 | TGCT | -0.025585633 |
| UPP1 | CD274    | UVM  | 0.030197581  |
| UPP1 | PDCD1LG2 | UVM  | 0.185367961  |
| UPP1 | CD276    | UVM  | 0.125880253  |
| UPP1 | VTCN1    | UVM  | 0.266455811  |
| UPP1 | BTLA     | UVM  | 0.100706652  |
| UPP1 | CD70     | UVM  | 0.261870763  |
| UPP1 | CD47     | UVM  | -0.083068083 |
| UPP1 | LGALS9   | UVM  | 0.453488295  |
| UPP1 | SIGLEC15 | UVM  | -0.005601577 |
| UPP1 | CD274    | THYM | -0.085906438 |
| UPP1 | PDCD1LG2 | THYM | 0.194874591  |
| UPP1 | CD276    | THYM | 0.512806135  |
| UPP1 | VTCN1    | THYM | 0.234645927  |

|      |          |      |              |
|------|----------|------|--------------|
| UPP1 | BTLA     | THYM | 0.044689579  |
| UPP1 | CD70     | THYM | 0.614347987  |
| UPP1 | CD47     | THYM | -0.185910985 |
| UPP1 | LGALS9   | THYM | 0.265341781  |
| UPP1 | SIGLEC15 | THYM | 0.10878188   |
| UPP1 | CD274    | CHOL | -0.017824685 |
| UPP1 | PDCD1LG2 | CHOL | 0.125764596  |
| UPP1 | CD276    | CHOL | -0.011621838 |
| UPP1 | VTCN1    | CHOL | 0.041955842  |
| UPP1 | BTLA     | CHOL | 0.197324097  |
| UPP1 | CD70     | CHOL | 0.32830643   |
| UPP1 | CD47     | CHOL | -0.189912254 |
| UPP1 | LGALS9   | CHOL | 0.403704588  |
| UPP1 | SIGLEC15 | CHOL | -0.036777336 |
| UPP1 | CD274    | ESCA | 0.229402777  |
| UPP1 | PDCD1LG2 | ESCA | 0.203376954  |
| UPP1 | CD276    | ESCA | 0.206813881  |
| UPP1 | VTCN1    | ESCA | -0.232220964 |
| UPP1 | BTLA     | ESCA | -0.264997146 |
| UPP1 | CD70     | ESCA | -0.006871017 |
| UPP1 | CD47     | ESCA | 0.107677283  |
| UPP1 | LGALS9   | ESCA | -0.347854709 |
| UPP1 | SIGLEC15 | ESCA | -0.270443311 |
| UPP1 | CD274    | STAD | 0.075205133  |
| UPP1 | PDCD1LG2 | STAD | -0.006138517 |
| UPP1 | CD276    | STAD | 0.116602242  |
| UPP1 | VTCN1    | STAD | -0.002472851 |
| UPP1 | BTLA     | STAD | -0.144526065 |
| UPP1 | CD70     | STAD | 0.178709519  |
| UPP1 | CD47     | STAD | -0.104124202 |
| UPP1 | LGALS9   | STAD | 0.045082125  |
| UPP1 | SIGLEC15 | STAD | 0.08489766   |
| UPP1 | CD274    | LAML | 0.001825374  |
| UPP1 | PDCD1LG2 | LAML | 0.230605101  |
| UPP1 | CD276    | LAML | 0.452851515  |
| UPP1 | VTCN1    | LAML | -0.183271421 |
| UPP1 | BTLA     | LAML | 0.053622315  |
| UPP1 | CD70     | LAML | 0.133452545  |
| UPP1 | CD47     | LAML | -0.468866369 |
| UPP1 | LGALS9   | LAML | 0.112698148  |
| UPP1 | SIGLEC15 | LAML | 0.241894616  |

icers

p-value

0.007131208

0.019038378

0.001646344

0.82740817

0.03791136

0.014767967

0.391992307

0.031343167

0.384650454

2.23E-06

2.60E-15

0.005820575

0.111282565

6.35E-05

2.72E-09

0.015097526

0.000111796

0.002673478

0.45187354

0.813101361

7.10E-07

0.729521305

0.000321044

0.16433582

0.113551941

0.155139131

0.083601177

2.99E-05

4.61E-09

0.0597129

0.344735488

0.54176175

6.68E-12

0.880797252

1.88E-08

4.33E-05

0.887722028

0.227749306

1.25E-05

0.060321235

0.192689194

0.703205797  
0.02063365  
0.986179784  
0.021387382  
0.883326731  
0.038448902  
1.01E-06  
3.41E-10  
1.66E-14  
0.268386653  
2.19E-11  
1.65E-17  
0.00029343  
0.000206134  
1.99E-17  
0.353527944  
1.73E-13  
0.002761521  
1.44E-14  
0.611791422  
5.36E-51  
0.001897573  
0.273636858  
0.031578295  
0.000145093  
0.081806641  
0.594325279  
0.487000208  
0.428783365  
1.42E-05  
0.02549577  
0.446782777  
0.594588568  
1.03E-07  
0.634128049  
0.378075541  
1.12E-07  
0.208461452  
1.25E-07  
0.027085016  
2.70E-06  
6.43E-12  
0.001835134

0.944725621  
2.66E-07  
2.64E-14  
0.000850207  
2.37E-20  
2.93E-11  
1.51E-05  
1.85E-10  
0.003967262  
1.23E-11  
0.8431774  
3.81E-11  
5.22E-05  
0.161812978  
0.683125915  
5.05E-11  
1.51E-07  
5.97E-08  
0.373207148  
0.046525198  
1.03E-14  
0.970441249  
0.1610949  
5.11E-05  
0.169925489  
0.058862527  
0.005319624  
0.058340023  
0.070952698  
0.130786113  
7.98E-07  
0.045234408  
0.004428656  
0.504239733  
0.000141231  
9.65E-06  
0.379239934  
0.51471808  
0.002921613  
0.006314246  
0.085596815  
0.06157807  
0.002948015

4.62E-07  
3.60E-09  
0.248242557  
0.000667297  
0.000521075  
0.978242527  
0.126860858  
1.27E-17  
0.220325239  
0.000280842  
2.64E-10  
5.78E-05  
0.369133066  
8.27E-16  
1.93E-06  
5.83E-24  
0.248261552  
2.29E-10  
1.84E-37  
2.49E-32  
0.000119563  
2.44E-17  
1.74E-59  
1.46E-07  
1.80E-56  
0.078302809  
1.45E-05  
3.92E-15  
0.166972893  
4.02E-09  
0.0552432  
9.83E-25  
4.62E-06  
3.54E-06  
0.000250022  
0.003756799  
0.019162065  
0.276322815  
0.015191756  
0.130948724  
0.056949465  
0.02955777  
2.33E-05



0.000583548  
8.41E-06  
7.06E-12  
1.61E-05  
0.033733845  
0.032725266  
5.76E-12  
6.21E-10  
6.02E-06  
0.04566492  
0.035960844  
0.058398076  
0.049039042  
0.003840695  
0.017630526  
0.71186641  
0.446114449  
0.835601941  
0.041698672  
8.33E-15  
6.74E-17  
4.62E-60  
1.43E-48  
2.31E-05  
9.53E-46  
5.73E-20  
2.05E-20  
2.01E-54  
5.51E-18  
3.67E-50  
3.94E-35  
7.85E-07  
4.06E-15  
6.62E-18  
0.400232098  
3.95E-42  
0.000239592  
1.27E-17  
2.02E-10  
4.99E-07  
0.78523485  
0.497387272  
9.08E-15

3.19E-06  
1.33E-09  
2.95E-08  
0.00081982  
0.000169686  
0.079805154  
0.923149751  
0.013104855  
0.167660776  
0.910401051  
4.90E-05  
0.50890028  
0.547008741  
0.015748372  
8.53E-08  
0.495181843  
0.020527666  
4.95E-05  
0.370436615  
7.99E-12  
0.121991614  
0.001311702  
0.003258888  
4.85E-08  
2.52E-12  
3.48E-26  
3.40E-24  
0.002965936  
0.037445428  
0.751208496  
0.790312296  
0.099725088  
0.26587179  
0.016889279  
0.374092437  
0.018951316  
0.463828359  
2.40E-05  
0.960669163  
0.350854044  
0.032933504  
2.12E-09  
0.009890514

0.627911881  
8.48E-14  
0.042052953  
0.003401189  
0.236933499  
0.917818697  
0.464860771  
0.946364951  
0.808038127  
0.248686081  
0.050596386  
0.267260571  
0.014619343  
0.8313673  
0.00173356  
0.005623937  
0.004851074  
0.001513887  
0.000277647  
0.926246022  
0.145700999  
1.31E-06  
0.000204897  
0.126118045  
0.900780774  
0.017486545  
0.959943938  
0.003169043  
0.000253096  
0.033960498  
0.359620496  
0.084095839  
0.980984212  
0.002270222  
3.96E-10  
0.015797408  
0.483501054  
0.080048073  
7.71E-11  
0.1398704  
0.001344472

**Table S6: Clinical information of ESCC patients (Single-cell RNA-seq) enrolled i**

| ID  | Gender | Age | Smoking | pT | pN | pM |
|-----|--------|-----|---------|----|----|----|
| P4  | Female | 47  | N       | 3  | 0  | 0  |
| P3  | Male   | 77  | N       | 3  | 0  | 0  |
| P1  | Male   | 76  | N       | 2  | 0  | 0  |
| P5  | Male   | 64  | E       | 3  | 1  | 0  |
| P7  | Female | 74  | N       | 1b | 2  | 0  |
| P9  | Female | 63  | N       | 2  | 2  | 0  |
| P8  | Male   | 76  | E       | 3  | 1  | 0  |
| P11 | Male   | 54  | E       | 1b | 0  | 0  |

**in this study**

| Stage | Ki-67 |
|-------|-------|
| IIB   | 80%+  |
| IIB   | 90%+  |
| IIA   | 80%+  |
| IIIB  | 90%+  |
| IIIA  | 80%+  |
| IIIB  | 80%+  |
| IIIB  | 90%+  |
| IB    | 80%+  |

**Table S7: Marker genes of each cluster in ESCC scRNA-seq data**

Sheet 1: Immune cells

Sheet 2: Fibroblasts

Sheet 3: Endothelial cells

## Sheet 1: Immune cells

| <b>Immune cells</b> | <b>p_val</b> | <b>avg_log2FC</b> | <b>pct.1</b> | <b>pct.2</b> |
|---------------------|--------------|-------------------|--------------|--------------|
| TSHZ2               | 0            | 1.64106541        | 0.484        | 0.185        |
| IL7R                | 0            | 1.621827          | 0.859        | 0.388        |
| FAAH2               | 0            | 1.42881799        | 0.509        | 0.193        |
| CRYBG1              | 0            | 1.288668554       | 0.677        | 0.435        |
| ANK3                | 0            | 1.247647813       | 0.417        | 0.225        |
| BCL11B              | 0            | 1.214723279       | 0.786        | 0.361        |
| RORA                | 0            | 1.208641057       | 0.737        | 0.358        |
| ITK                 | 0            | 1.190046999       | 0.79         | 0.364        |
| FYB1                | 0            | 1.167487341       | 0.808        | 0.485        |
| CMTM8               | 0            | 1.130412146       | 0.296        | 0.067        |
| BATF                | 0            | 1.106111411       | 0.599        | 0.323        |
| LEF1                | 0            | 1.096853965       | 0.318        | 0.074        |
| INPP4B              | 0            | 1.073424409       | 0.586        | 0.285        |
| TNIK                | 0            | 1.059455211       | 0.676        | 0.335        |
| CAMK4               | 0            | 1.054738378       | 0.656        | 0.32         |
| IL6ST               | 0            | 1.038164842       | 0.643        | 0.448        |
| ZNF831              | 0            | 1.035338153       | 0.668        | 0.323        |
| NDFIP1              | 0            | 1.027038719       | 0.672        | 0.493        |
| LEPROTL1            | 0            | 1.01088108        | 0.83         | 0.561        |
| ICOS                | 0            | 1.005425415       | 0.663        | 0.284        |
| PRKCA               | 0            | 0.988814264       | 0.546        | 0.34         |
| SPOCK2              | 0            | 0.986827086       | 0.747        | 0.377        |
| SARAF               | 0            | 0.983881966       | 0.942        | 0.838        |
| BTBD11              | 0            | 0.982427659       | 0.296        | 0.122        |
| KLRB1               | 0            | 0.974600891       | 0.335        | 0.132        |
| RAPGEF6             | 0            | 0.96181354        | 0.737        | 0.56         |
| MAF                 | 0            | 0.960704527       | 0.518        | 0.264        |
| SERINC5             | 0            | 0.959726541       | 0.526        | 0.3          |
| LDLRAD4             | 0            | 0.958978667       | 0.88         | 0.642        |
| CNOT6L              | 0            | 0.949833615       | 0.92         | 0.718        |
| GIMAP7              | 0            | 0.945381046       | 0.466        | 0.233        |
| TBC1D4              | 0            | 0.911977062       | 0.484        | 0.227        |
| TNFSF8              | 0            | 0.911573034       | 0.394        | 0.177        |
| ABCC1               | 0            | 0.910871123       | 0.663        | 0.42         |
| CDC14A              | 0            | 0.908550743       | 0.579        | 0.365        |
| IKZF1               | 0            | 0.901406091       | 0.777        | 0.578        |
| CD2                 | 0            | 0.888613285       | 0.802        | 0.43         |
| ICA1                | 0            | 0.885776626       | 0.287        | 0.125        |
| AP3M2               | 0            | 0.870722186       | 0.325        | 0.133        |
| FYN                 | 0            | 0.865113863       | 0.954        | 0.627        |
| CD28                | 0            | 0.845907732       | 0.497        | 0.189        |

|            |   |             |       |       |
|------------|---|-------------|-------|-------|
| TC2N       | 0 | 0.842796246 | 0.425 | 0.184 |
| CD6        | 0 | 0.836902602 | 0.494 | 0.224 |
| HERC1      | 0 | 0.834677315 | 0.757 | 0.582 |
| TTC39C     | 0 | 0.832149162 | 0.559 | 0.326 |
| PBX4       | 0 | 0.829495916 | 0.591 | 0.306 |
| AC010609.1 | 0 | 0.82795462  | 0.407 | 0.164 |
| IPCEF1     | 0 | 0.81437621  | 0.491 | 0.246 |
| CD247      | 0 | 0.813636165 | 0.763 | 0.393 |
| FKBP5      | 0 | 0.810837955 | 0.774 | 0.672 |
| SAMHD1     | 0 | 0.809969311 | 0.535 | 0.328 |
| PLCL1      | 0 | 0.805805054 | 0.431 | 0.214 |
| AAK1       | 0 | 0.805053403 | 0.657 | 0.424 |
| LTB        | 0 | 0.803701785 | 0.635 | 0.399 |
| GPRIN3     | 0 | 0.798529339 | 0.593 | 0.385 |
| RNF125     | 0 | 0.791292754 | 0.57  | 0.337 |
| PPP2R5C    | 0 | 0.787081737 | 0.881 | 0.741 |
| MPP7       | 0 | 0.783815085 | 0.508 | 0.284 |
| RETREG1    | 0 | 0.773002308 | 0.303 | 0.124 |
| SYNE2      | 0 | 0.765418145 | 0.828 | 0.536 |
| TRBC2      | 0 | 0.764945405 | 0.683 | 0.439 |
| PIK3IP1    | 0 | 0.755739521 | 0.673 | 0.451 |
| TESPA1     | 0 | 0.751353584 | 0.311 | 0.127 |
| BICDL1     | 0 | 0.750837857 | 0.618 | 0.359 |
| TRAC       | 0 | 0.743016587 | 0.702 | 0.38  |
| IQGAP2     | 0 | 0.731337664 | 0.816 | 0.608 |
| EML4       | 0 | 0.731201063 | 0.824 | 0.688 |
| ETS1       | 0 | 0.729840842 | 0.871 | 0.596 |
| PITPNC1    | 0 | 0.729606224 | 0.723 | 0.515 |
| FXYD5      | 0 | 0.725595808 | 0.715 | 0.564 |
| PHACTR2    | 0 | 0.720742561 | 0.615 | 0.396 |
| ANKRD12    | 0 | 0.715005598 | 0.907 | 0.808 |
| PBXIP1     | 0 | 0.712386724 | 0.615 | 0.389 |
| CD3E       | 0 | 0.706420709 | 0.707 | 0.378 |
| TCF7       | 0 | 0.705972952 | 0.367 | 0.179 |
| IL32       | 0 | 0.692618637 | 0.754 | 0.445 |
| SKAP1      | 0 | 0.685718718 | 0.768 | 0.468 |
| RCAN3      | 0 | 0.67817459  | 0.464 | 0.273 |
| RNF19A     | 0 | 0.658290803 | 0.766 | 0.597 |
| CTLA4      | 0 | 0.655492046 | 0.468 | 0.248 |
| PDE3B      | 0 | 0.646621827 | 0.757 | 0.542 |
| PRKCH      | 0 | 0.645895423 | 0.81  | 0.526 |
| FOXP1      | 0 | 0.64093353  | 0.854 | 0.714 |
| PDCD4      | 0 | 0.634314628 | 0.744 | 0.596 |



|            |           |             |       |       |
|------------|-----------|-------------|-------|-------|
| SRGN       | 0         | 0.628951918 | 0.947 | 0.873 |
| CASK       | 0         | 0.626440071 | 0.653 | 0.456 |
| DUSP16     | 0         | 0.618900738 | 0.678 | 0.436 |
| FOXO1      | 0         | 0.616991358 | 0.786 | 0.586 |
| CD3D       | 0         | 0.572669981 | 0.788 | 0.408 |
| ARHGDIB    | 0         | 0.524295509 | 0.863 | 0.785 |
| CDC42SE2   | 0         | 0.512337557 | 0.906 | 0.78  |
| PTPRC      | 0         | 0.488978305 | 0.969 | 0.864 |
| TPT1       | 0         | 0.485440938 | 0.957 | 0.962 |
| CD3G       | 0         | 0.419183984 | 0.644 | 0.352 |
| MALAT1     | 0         | 0.393855522 | 1     | 0.983 |
| CD5        | 6.95E-308 | 0.509248244 | 0.267 | 0.11  |
| PPP1R2     | 5.75E-303 | 0.638453942 | 0.718 | 0.589 |
| CELF2      | 1.62E-302 | 0.657953312 | 0.81  | 0.702 |
| EEF1A1     | 1.26E-301 | 0.390408098 | 0.961 | 0.957 |
| OXNAD1     | 7.79E-300 | 0.60666573  | 0.583 | 0.391 |
| DDX24      | 7.54E-299 | 0.543199012 | 0.794 | 0.691 |
| PRKCQ-AS1  | 7.81E-294 | 0.612710501 | 0.262 | 0.11  |
| TRBC1      | 1.33E-292 | 0.789307833 | 0.467 | 0.262 |
| AL136456.1 | 1.45E-288 | 0.459126216 | 0.363 | 0.17  |
| TSC22D3    | 1.92E-288 | 0.522282566 | 0.897 | 0.825 |
| RORA-AS1   | 5.19E-288 | 0.644597184 | 0.367 | 0.192 |
| STK4       | 8.55E-288 | 0.502303082 | 0.863 | 0.767 |
| ARID4B     | 5.00E-284 | 0.48118766  | 0.86  | 0.764 |
| LDHB       | 4.20E-283 | 0.6194633   | 0.605 | 0.477 |
| MBNL1      | 1.00E-279 | 0.446155232 | 0.94  | 0.852 |
| PRKCQ      | 7.41E-279 | 0.582944695 | 0.475 | 0.274 |
| TRAT1      | 8.83E-278 | 0.541714394 | 0.338 | 0.162 |
| EPC1       | 3.44E-277 | 0.516327963 | 0.814 | 0.707 |
| DOCK9      | 2.70E-275 | 0.625638117 | 0.34  | 0.173 |
| MRPL1      | 6.07E-275 | 0.831356494 | 0.565 | 0.397 |
| LINC00513  | 8.11E-275 | 0.633011479 | 0.758 | 0.63  |
| ARID5B     | 1.25E-274 | 0.541772868 | 0.848 | 0.728 |
| NAP1L4     | 2.75E-274 | 0.586830735 | 0.701 | 0.546 |
| CD96       | 1.53E-273 | 0.540847564 | 0.666 | 0.441 |
| TNFAIP3    | 7.67E-272 | 0.565008425 | 0.851 | 0.68  |
| DDX5       | 8.33E-272 | 0.38738021  | 0.946 | 0.894 |
| TLK1       | 1.33E-271 | 0.607274531 | 0.655 | 0.506 |
| GSPT1      | 4.43E-271 | 0.648733475 | 0.676 | 0.55  |
| SOD1       | 2.72E-269 | 0.583978605 | 0.762 | 0.646 |
| NR3C1      | 6.85E-266 | 0.775986788 | 0.765 | 0.664 |
| CREM       | 5.12E-264 | 0.592148294 | 0.863 | 0.764 |
| FAM177A1   | 2.74E-259 | 0.704904839 | 0.622 | 0.497 |

|            |           |             |       |       |
|------------|-----------|-------------|-------|-------|
| CRY1       | 2.96E-255 | 0.673523392 | 0.51  | 0.338 |
| THEMIS     | 1.42E-254 | 0.599536768 | 0.395 | 0.209 |
| C12orf57   | 2.77E-253 | 0.573217802 | 0.621 | 0.488 |
| CCDC66     | 2.40E-251 | 0.633248174 | 0.393 | 0.234 |
| SYTL3      | 1.70E-250 | 0.512075003 | 0.797 | 0.629 |
| RBMS1      | 2.99E-248 | 0.957656238 | 0.513 | 0.369 |
| ITM2A      | 1.94E-245 | 0.564742487 | 0.496 | 0.307 |
| UGP2       | 7.89E-245 | 0.704820061 | 0.513 | 0.362 |
| CYTH1      | 1.86E-243 | 0.511079239 | 0.78  | 0.672 |
| DOCK10     | 9.90E-243 | 0.595733557 | 0.666 | 0.529 |
| NCK2       | 1.42E-242 | 0.533807588 | 0.572 | 0.399 |
| ITPKB      | 3.25E-236 | 0.742843011 | 0.446 | 0.297 |
| OSBPL8     | 2.00E-235 | 0.663831735 | 0.786 | 0.694 |
| KLF12      | 2.65E-235 | 0.586254306 | 0.631 | 0.468 |
| CD7        | 3.77E-232 | 0.374819975 | 0.584 | 0.357 |
| AC026979.2 | 2.03E-230 | 0.562750072 | 0.303 | 0.158 |
| LCK        | 2.16E-229 | 0.466733761 | 0.474 | 0.293 |
| SELL       | 5.71E-229 | 0.726766502 | 0.402 | 0.253 |
| ODF2L      | 4.06E-228 | 0.61524713  | 0.45  | 0.294 |
| PCBP3      | 5.36E-227 | 0.675168432 | 0.288 | 0.143 |
| CD4        | 7.15E-223 | 0.581481185 | 0.346 | 0.2   |
| ZC3HAV1    | 4.19E-221 | 0.494044397 | 0.773 | 0.667 |
| LINC01578  | 2.74E-218 | 0.509499594 | 0.727 | 0.641 |
| PVT1       | 7.02E-217 | 0.546393316 | 0.529 | 0.366 |
| STAT3      | 8.57E-217 | 0.425115583 | 0.732 | 0.634 |
| EIF1       | 1.04E-214 | 0.346775973 | 0.949 | 0.94  |
| CCR6       | 3.29E-213 | 0.669695141 | 0.35  | 0.205 |
| FAM107B    | 2.46E-212 | 0.452239513 | 0.83  | 0.732 |
| MAP3K5     | 2.53E-212 | 0.53105489  | 0.58  | 0.427 |
| ZFP36L2    | 3.66E-209 | 0.576146815 | 0.861 | 0.808 |
| IL18R1     | 8.67E-208 | 0.449168548 | 0.323 | 0.177 |
| HECA       | 1.21E-207 | 0.550404157 | 0.594 | 0.474 |
| TNFRSF4    | 3.07E-206 | 0.695951022 | 0.265 | 0.13  |
| STAT4      | 5.99E-206 | 0.470720074 | 0.744 | 0.574 |
| SESN3      | 6.30E-206 | 0.824328581 | 0.496 | 0.35  |
| ZC3H12D    | 3.93E-204 | 0.596902576 | 0.377 | 0.229 |
| TXK        | 5.93E-203 | 0.665235737 | 0.277 | 0.144 |
| LAT        | 8.13E-202 | 0.441265648 | 0.314 | 0.171 |
| CCR7       | 1.21E-200 | 0.721132368 | 0.387 | 0.242 |
| B2M        | 5.63E-200 | 0.307814074 | 0.98  | 0.978 |
| STK17B     | 6.71E-199 | 0.376848377 | 0.872 | 0.792 |
| TIGIT      | 1.21E-198 | 0.719197192 | 0.44  | 0.281 |
| ABLIM1     | 8.99E-195 | 0.539290377 | 0.506 | 0.342 |

|            |           |             |       |       |
|------------|-----------|-------------|-------|-------|
| ZEB1       | 8.25E-193 | 0.475599693 | 0.667 | 0.515 |
| HNRNPLL    | 1.07E-191 | 0.537329701 | 0.45  | 0.296 |
| MLLT3      | 5.36E-191 | 0.489975933 | 0.436 | 0.275 |
| MGAT4A     | 1.92E-190 | 0.6433694   | 0.449 | 0.311 |
| AP000787.1 | 2.15E-190 | 0.784753188 | 0.371 | 0.231 |
| SMCHD1     | 8.64E-190 | 0.405586305 | 0.885 | 0.814 |
| CALM1      | 3.06E-188 | 0.354717819 | 0.903 | 0.867 |
| GLCCI1     | 4.49E-188 | 0.556502055 | 0.569 | 0.416 |
| EEF1D      | 2.54E-187 | 0.341217708 | 0.87  | 0.864 |
| CCSER2     | 7.33E-187 | 0.393280636 | 0.672 | 0.52  |
| EVL        | 2.49E-186 | 0.430819993 | 0.644 | 0.501 |
| TSPAN5     | 2.28E-185 | 0.517437294 | 0.466 | 0.307 |
| MFHAS1     | 2.52E-185 | 0.6922262   | 0.329 | 0.195 |
| CEMIP2     | 1.76E-182 | 0.37127585  | 0.784 | 0.647 |
| EPB41      | 2.67E-182 | 0.520974566 | 0.597 | 0.47  |
| SEPTIN6    | 3.05E-182 | 0.455508511 | 0.701 | 0.605 |
| MPZL3      | 4.41E-181 | 0.509723643 | 0.361 | 0.22  |
| CXCR4      | 1.26E-178 | 0.374793214 | 0.895 | 0.799 |
| CNST       | 2.62E-178 | 0.501819706 | 0.467 | 0.33  |
| CCNH       | 4.89E-178 | 0.522043552 | 0.724 | 0.641 |
| ARL4C      | 4.45E-177 | 0.493874399 | 0.625 | 0.481 |
| LINC01619  | 3.40E-176 | 0.458966381 | 0.775 | 0.642 |
| N4BP2L2    | 1.76E-174 | 0.427828454 | 0.736 | 0.654 |
| TMEM173    | 6.38E-173 | 0.50626356  | 0.299 | 0.175 |
| TOMM7      | 1.91E-169 | 0.349004255 | 0.784 | 0.758 |
| FAM118A    | 8.51E-167 | 0.487565103 | 0.352 | 0.223 |
| GIMAP5     | 7.27E-165 | 0.479879795 | 0.27  | 0.151 |
| PCNX1      | 1.06E-164 | 0.508383851 | 0.583 | 0.479 |
| LIME1      | 2.47E-164 | 0.437312753 | 0.374 | 0.238 |
| PGAP1      | 9.24E-163 | 0.855554195 | 0.313 | 0.188 |
| PABPC1     | 1.03E-162 | 0.472723213 | 0.88  | 0.843 |
| MAP3K4     | 9.49E-162 | 0.798021995 | 0.336 | 0.223 |
| SF1        | 4.34E-160 | 0.452032065 | 0.665 | 0.582 |
| PER1       | 7.56E-160 | 0.529391314 | 0.489 | 0.386 |
| PPP1CB     | 3.87E-159 | 0.426540183 | 0.67  | 0.584 |
| PATJ       | 9.34E-159 | 0.498544732 | 0.323 | 0.195 |
| CIRBP      | 2.70E-155 | 0.371378652 | 0.763 | 0.702 |
| CLEC2D     | 2.63E-154 | 0.337211605 | 0.66  | 0.507 |
| NIBAN1     | 6.41E-152 | 0.463716914 | 0.665 | 0.546 |
| YWHAB      | 7.28E-152 | 0.458174356 | 0.753 | 0.699 |
| NAP1L1     | 3.53E-151 | 0.347232479 | 0.74  | 0.669 |
| LRRC8C     | 9.00E-150 | 0.532708653 | 0.459 | 0.337 |
| ARHGEF3    | 7.66E-149 | 0.539536684 | 0.411 | 0.287 |

|            |           |             |       |       |
|------------|-----------|-------------|-------|-------|
| ESYT2      | 2.36E-148 | 0.491286963 | 0.593 | 0.499 |
| BTG1       | 8.44E-146 | 0.259218268 | 0.967 | 0.907 |
| STAT5B     | 2.82E-144 | 0.405479922 | 0.522 | 0.389 |
| RSBN1      | 4.95E-144 | 0.460275416 | 0.453 | 0.333 |
| RAP1A      | 9.08E-144 | 0.416828459 | 0.669 | 0.59  |
| SRSF5      | 3.97E-143 | 0.349308454 | 0.798 | 0.746 |
| GPCPD1     | 1.62E-142 | 0.46826902  | 0.648 | 0.563 |
| NDUFV2     | 2.86E-141 | 0.495678853 | 0.609 | 0.539 |
| OGDH       | 1.83E-140 | 0.555917215 | 0.52  | 0.426 |
| SRSF7      | 6.29E-140 | 0.29195381  | 0.848 | 0.777 |
| AP001011.1 | 2.17E-139 | 0.487151329 | 0.59  | 0.466 |
| NOP58      | 2.22E-138 | 0.3800029   | 0.694 | 0.605 |
| USP3-AS1   | 8.30E-135 | 0.551920719 | 0.366 | 0.258 |
| ARHGAP15   | 4.88E-134 | 0.262238879 | 0.91  | 0.829 |
| CNBP       | 9.91E-134 | 0.359995665 | 0.67  | 0.615 |
| THADA      | 2.90E-133 | 0.655912636 | 0.507 | 0.406 |
| RBM39      | 8.33E-132 | 0.267025553 | 0.905 | 0.859 |
| STAM       | 1.00E-131 | 0.493682535 | 0.459 | 0.345 |
| P2RY10     | 1.80E-131 | 0.467959369 | 0.419 | 0.299 |
| CHD2       | 5.85E-131 | 0.363676273 | 0.796 | 0.735 |
| SNHG6      | 4.93E-129 | 0.3800917   | 0.665 | 0.609 |
| NOP53      | 7.30E-128 | 0.32802103  | 0.74  | 0.701 |
| FAS        | 7.67E-127 | 0.482215701 | 0.317 | 0.209 |
| GMFG       | 8.77E-126 | 0.364390807 | 0.684 | 0.622 |
| ATXN7      | 1.15E-125 | 0.444536797 | 0.461 | 0.356 |
| SKP1       | 3.20E-125 | 0.297610645 | 0.757 | 0.713 |
| MXI1       | 7.83E-125 | 0.467248514 | 0.273 | 0.17  |
| USP3       | 1.56E-124 | 0.511425921 | 0.58  | 0.518 |
| SLA        | 1.63E-124 | 0.286719147 | 0.624 | 0.491 |
| TSPYL2     | 7.58E-124 | 0.451091645 | 0.579 | 0.472 |
| CD226      | 1.04E-122 | 0.424553653 | 0.287 | 0.178 |
| MCUB       | 5.06E-122 | 0.47902775  | 0.435 | 0.335 |
| ASXL1      | 1.78E-121 | 0.42425786  | 0.583 | 0.494 |
| RGCC       | 3.59E-120 | 0.445400072 | 0.563 | 0.45  |
| CDKN1B     | 3.31E-118 | 0.435492285 | 0.464 | 0.366 |
| KAT6A      | 5.79E-118 | 0.410919873 | 0.629 | 0.549 |
| SFXN1      | 6.31E-118 | 0.423666819 | 0.276 | 0.176 |
| USP15      | 3.58E-117 | 0.301127538 | 0.789 | 0.734 |
| DDIT4      | 2.44E-114 | 0.567306919 | 0.566 | 0.489 |
| TNFAIP8    | 4.42E-114 | 0.399116216 | 0.67  | 0.592 |
| EIF3E      | 4.86E-114 | 0.302466964 | 0.711 | 0.676 |
| AC044849.1 | 5.89E-114 | 0.423677274 | 0.385 | 0.274 |
| TNRC6C     | 8.35E-114 | 0.417076077 | 0.349 | 0.241 |

|            |           |             |       |       |
|------------|-----------|-------------|-------|-------|
| DISC1      | 1.50E-113 | 0.564891273 | 0.253 | 0.16  |
| APBB1IP    | 3.65E-113 | 0.339325176 | 0.658 | 0.565 |
| CRTC3      | 7.44E-112 | 0.49608792  | 0.358 | 0.264 |
| ATP2B4     | 2.89E-110 | 0.443269776 | 0.404 | 0.294 |
| TMEM245    | 3.43E-110 | 0.455501232 | 0.339 | 0.236 |
| LINC-PINT  | 2.86E-109 | 0.33937359  | 0.717 | 0.651 |
| WWP1       | 1.98E-107 | 0.448994184 | 0.334 | 0.238 |
| UQCRB      | 2.42E-107 | 0.269757964 | 0.771 | 0.76  |
| KLF6       | 4.87E-107 | 0.342826058 | 0.839 | 0.772 |
| HINT1      | 4.74E-106 | 0.287864202 | 0.764 | 0.739 |
| GATA3      | 1.44E-105 | 0.371785245 | 0.262 | 0.161 |
| TNRC6B     | 3.71E-105 | 0.312827213 | 0.749 | 0.691 |
| KAT6B      | 6.30E-105 | 0.438035676 | 0.559 | 0.471 |
| PRDX2      | 7.36E-104 | 0.350825907 | 0.434 | 0.341 |
| CASP8      | 9.31E-104 | 0.404096986 | 0.526 | 0.432 |
| WAKMAR2    | 1.59E-103 | 0.466794883 | 0.329 | 0.231 |
| PRKY       | 2.03E-103 | 0.408638846 | 0.266 | 0.167 |
| MAML2      | 1.06E-101 | 0.485977822 | 0.642 | 0.566 |
| CERK       | 1.70E-101 | 0.427729288 | 0.297 | 0.207 |
| CORO1B     | 2.57E-101 | 0.488232754 | 0.349 | 0.258 |
| DGKA       | 4.54E-101 | 0.375596995 | 0.252 | 0.164 |
| SCML4      | 4.61E-101 | 0.396549633 | 0.375 | 0.262 |
| MYH9       | 4.83E-101 | 0.30512956  | 0.724 | 0.668 |
| ATXN1      | 2.18E-100 | 0.275354487 | 0.775 | 0.66  |
| ZNRF1      | 4.86E-100 | 0.414262885 | 0.293 | 0.196 |
| PRORP      | 5.28E-100 | 0.467527145 | 0.332 | 0.239 |
| GAS5       | 1.49E-99  | 0.260841747 | 0.72  | 0.677 |
| GALM       | 4.39E-99  | 0.386693552 | 0.508 | 0.408 |
| SMYD3      | 2.14E-98  | 0.413236871 | 0.621 | 0.533 |
| GIMAP4     | 3.12E-97  | 0.361906088 | 0.339 | 0.237 |
| ARID5A     | 1.62E-96  | 0.501613519 | 0.449 | 0.373 |
| PPP1R16B   | 2.91E-96  | 0.335615998 | 0.681 | 0.57  |
| PTGES3     | 5.94E-95  | 0.304534724 | 0.75  | 0.71  |
| TIAM1      | 6.31E-94  | 0.415334979 | 0.332 | 0.233 |
| MORF4L1    | 9.09E-94  | 0.287087597 | 0.713 | 0.68  |
| ARNTL      | 1.52E-93  | 0.370118626 | 0.313 | 0.219 |
| USP47      | 1.66E-93  | 0.373538405 | 0.598 | 0.528 |
| RHBDD2     | 2.09E-93  | 0.412969774 | 0.314 | 0.224 |
| HIPK1      | 5.35E-93  | 0.447730604 | 0.41  | 0.329 |
| COMMD6     | 6.72E-93  | 0.267323138 | 0.678 | 0.633 |
| AC058791.1 | 1.14E-92  | 0.41098105  | 0.394 | 0.305 |
| RASA1      | 3.60E-92  | 0.404073509 | 0.51  | 0.427 |
| MPHOSPH8   | 3.70E-92  | 0.362758782 | 0.561 | 0.494 |

|            |          |             |       |       |
|------------|----------|-------------|-------|-------|
| RBMX       | 4.25E-92 | 0.34931323  | 0.593 | 0.533 |
| PTGER4     | 1.76E-91 | 0.441944166 | 0.416 | 0.328 |
| BICRAL     | 4.17E-90 | 0.422994482 | 0.452 | 0.369 |
| SFMBT1     | 2.21E-89 | 0.325957266 | 0.405 | 0.301 |
| HLA-A      | 6.73E-89 | 0.273470134 | 0.939 | 0.92  |
| NSMCE3     | 4.44E-88 | 0.426066321 | 0.381 | 0.294 |
| AKT3       | 6.80E-88 | 0.395479581 | 0.573 | 0.49  |
| JMY        | 1.88E-87 | 0.386573899 | 0.542 | 0.464 |
| AC068587.4 | 2.29E-87 | 0.415552902 | 0.285 | 0.195 |
| LPIN2      | 5.57E-87 | 0.386847512 | 0.437 | 0.353 |
| FBXO32     | 1.07E-86 | 0.42115267  | 0.254 | 0.168 |
| IRS2       | 1.72E-86 | 0.261313178 | 0.42  | 0.324 |
| GCC2       | 5.57E-86 | 0.337972914 | 0.589 | 0.53  |
| AC079793.1 | 1.02E-85 | 0.420716367 | 0.505 | 0.42  |
| SRSF3      | 6.11E-85 | 0.258661719 | 0.783 | 0.754 |
| TXNIP      | 8.60E-85 | 0.473655373 | 0.757 | 0.716 |
| SON        | 1.20E-84 | 0.257984859 | 0.76  | 0.727 |
| GYPC       | 1.84E-84 | 0.381471138 | 0.539 | 0.478 |
| RGS10      | 2.79E-84 | 0.290501627 | 0.487 | 0.394 |
| IDS        | 3.29E-84 | 0.369862947 | 0.595 | 0.54  |
| CUL3       | 1.49E-83 | 0.295822037 | 0.694 | 0.628 |
| SPTAN1     | 1.76E-83 | 0.371542519 | 0.535 | 0.459 |
| TNFRSF18   | 1.84E-83 | 0.439830306 | 0.284 | 0.19  |
| PAK2       | 8.31E-83 | 0.32665945  | 0.642 | 0.591 |
| ANXA1      | 1.38E-82 | 0.706703017 | 0.494 | 0.414 |
| GPHN       | 1.45E-82 | 0.464670151 | 0.449 | 0.363 |
| SLC7A6     | 1.97E-82 | 0.392019297 | 0.26  | 0.179 |
| LBH        | 9.23E-82 | 0.300427321 | 0.451 | 0.352 |
| SATB1      | 1.37E-81 | 0.401725165 | 0.302 | 0.22  |
| CACYBP     | 1.64E-81 | 0.422658982 | 0.584 | 0.512 |
| EVI2A      | 3.03E-81 | 0.401127397 | 0.447 | 0.374 |
| CSGALNACT1 | 9.43E-81 | 0.38324703  | 0.276 | 0.188 |
| EMB        | 1.05E-80 | 0.314170112 | 0.581 | 0.501 |
| KIAA1109   | 1.92E-80 | 0.404886313 | 0.426 | 0.345 |
| H2AFV      | 7.49E-80 | 0.340716942 | 0.546 | 0.498 |
| SC5D       | 2.47E-79 | 0.38346306  | 0.33  | 0.242 |
| TOB1       | 4.19E-79 | 0.466699257 | 0.369 | 0.292 |
| TRERF1     | 7.96E-79 | 0.400873447 | 0.314 | 0.225 |
| ATXN7L1    | 1.85E-77 | 0.398387618 | 0.284 | 0.203 |
| TECR       | 2.24E-77 | 0.381271126 | 0.393 | 0.323 |
| ANAPC16    | 9.52E-77 | 0.261878086 | 0.65  | 0.611 |
| BIRC3      | 1.75E-76 | 0.331979934 | 0.607 | 0.531 |
| S100A4     | 4.08E-76 | 0.314389512 | 0.687 | 0.584 |

|            |          |             |       |       |
|------------|----------|-------------|-------|-------|
| UBE2B      | 7.45E-76 | 0.291422508 | 0.712 | 0.686 |
| SLC9A9     | 2.50E-75 | 0.54254938  | 0.38  | 0.304 |
| RSRP1      | 3.00E-75 | 0.277907664 | 0.641 | 0.597 |
| ANP32B     | 3.51E-75 | 0.25579957  | 0.604 | 0.561 |
| GPR171     | 2.36E-74 | 0.432666793 | 0.262 | 0.178 |
| RASGRP1    | 3.13E-74 | 0.324866036 | 0.376 | 0.281 |
| AL499604.1 | 1.07E-73 | 0.407174225 | 0.266 | 0.191 |
| ELK3       | 4.89E-73 | 0.399427708 | 0.391 | 0.322 |
| CMSS1      | 8.35E-73 | 0.556879471 | 0.522 | 0.443 |
| STK38      | 1.04E-72 | 0.427033267 | 0.319 | 0.245 |
| ICAM2      | 2.55E-72 | 0.384927371 | 0.262 | 0.191 |
| PACS1      | 2.84E-72 | 0.327554223 | 0.56  | 0.482 |
| STK24      | 6.73E-72 | 0.376550836 | 0.533 | 0.477 |
| G3BP2      | 1.14E-71 | 0.341994322 | 0.59  | 0.536 |
| SLFN5      | 1.76E-71 | 0.299896701 | 0.386 | 0.299 |
| SOCS1      | 1.84E-71 | 0.326368305 | 0.455 | 0.373 |
| RUNX2      | 1.69E-70 | 0.47323101  | 0.353 | 0.276 |
| ADD3       | 2.02E-70 | 0.339747774 | 0.423 | 0.344 |
| MRFAP1     | 1.08E-69 | 0.351099972 | 0.488 | 0.436 |
| RFX3       | 1.58E-68 | 0.372253163 | 0.506 | 0.431 |
| OCIAD2     | 2.07E-68 | 0.307554032 | 0.413 | 0.336 |
| ACAP1      | 1.09E-67 | 0.276593385 | 0.522 | 0.45  |
| GSTK1      | 7.87E-67 | 0.313949181 | 0.487 | 0.436 |
| ESR2       | 5.49E-66 | 0.311365512 | 0.275 | 0.198 |
| TLE5       | 5.57E-66 | 0.269001345 | 0.552 | 0.503 |
| PYHIN1     | 1.06E-65 | 0.268703858 | 0.364 | 0.266 |
| METTL8     | 3.09E-65 | 0.39951044  | 0.26  | 0.187 |
| TNRC6A     | 5.58E-65 | 0.34382419  | 0.487 | 0.427 |
| TBC1D15    | 5.77E-65 | 0.308350864 | 0.515 | 0.469 |
| RASA3      | 9.86E-64 | 0.444782218 | 0.395 | 0.331 |
| SLAMF1     | 1.34E-63 | 0.313348691 | 0.253 | 0.178 |
| STAG1      | 1.79E-63 | 0.255462537 | 0.74  | 0.701 |
| CCDC88C    | 3.00E-63 | 0.309548128 | 0.474 | 0.402 |
| NDUFS5     | 5.27E-63 | 0.26202262  | 0.61  | 0.573 |
| MECP2      | 7.35E-63 | 0.323981414 | 0.506 | 0.448 |
| AC016831.7 | 1.10E-62 | 0.365912377 | 0.601 | 0.544 |
| CCDC91     | 7.88E-62 | 0.31096372  | 0.62  | 0.572 |
| PHTF2      | 3.70E-61 | 0.375529203 | 0.443 | 0.379 |
| LINC01934  | 4.63E-61 | 0.287962222 | 0.334 | 0.247 |
| SPATA13    | 6.37E-61 | 0.280200393 | 0.324 | 0.249 |
| EPC2       | 1.03E-60 | 0.330119822 | 0.487 | 0.431 |
| LMBR1      | 1.29E-60 | 0.387577194 | 0.374 | 0.306 |
| ARAP2      | 1.39E-60 | 0.381222047 | 0.533 | 0.47  |

|         |          |             |       |       |
|---------|----------|-------------|-------|-------|
| CRBN    | 3.82E-60 | 0.314640852 | 0.327 | 0.26  |
| KIF2A   | 6.39E-60 | 0.318764349 | 0.434 | 0.371 |
| PSIP1   | 1.19E-59 | 0.293797942 | 0.439 | 0.374 |
| NCOA2   | 1.73E-59 | 0.287205717 | 0.573 | 0.519 |
| CHURC1  | 1.12E-58 | 0.293487259 | 0.475 | 0.427 |
| ZNRF2   | 1.22E-58 | 0.347942717 | 0.461 | 0.403 |
| NKTR    | 1.45E-58 | 0.315066402 | 0.517 | 0.465 |
| SVIP    | 1.53E-58 | 0.316336163 | 0.289 | 0.221 |
| PCNX2   | 3.03E-58 | 0.350593229 | 0.349 | 0.275 |
| JAK3    | 4.91E-58 | 0.300149247 | 0.323 | 0.254 |
| DCTN6   | 7.41E-58 | 0.360212496 | 0.296 | 0.233 |
| TTC33   | 2.39E-57 | 0.354577216 | 0.28  | 0.215 |
| FOXN2   | 5.95E-57 | 0.441407334 | 0.377 | 0.316 |
| URI1    | 2.36E-56 | 0.297202231 | 0.442 | 0.384 |
| MZT2A   | 3.12E-56 | 0.265637607 | 0.473 | 0.422 |
| OGT     | 5.22E-56 | 0.324389369 | 0.48  | 0.433 |
| CHIC2   | 6.26E-55 | 0.309921887 | 0.453 | 0.399 |
| TBL1X   | 6.46E-55 | 0.374031679 | 0.373 | 0.304 |
| CCM2    | 1.21E-54 | 0.423788121 | 0.369 | 0.314 |
| ZBTB38  | 1.87E-53 | 0.340684788 | 0.424 | 0.366 |
| UBE2K   | 1.94E-53 | 0.326181966 | 0.537 | 0.504 |
| PARP8   | 4.62E-53 | 0.293692756 | 0.685 | 0.626 |
| CCND3   | 1.02E-52 | 0.337986029 | 0.585 | 0.542 |
| KANSL1  | 1.25E-52 | 0.286338782 | 0.577 | 0.532 |
| STK39   | 1.41E-52 | 0.331028932 | 0.283 | 0.215 |
| USP9Y   | 2.02E-52 | 0.311372442 | 0.326 | 0.253 |
| MBP     | 2.39E-52 | 0.294069545 | 0.628 | 0.588 |
| TSPYL1  | 3.43E-51 | 0.290119122 | 0.264 | 0.203 |
| ARFGEF1 | 5.83E-51 | 0.293095786 | 0.51  | 0.468 |
| BCAS2   | 6.42E-51 | 0.311500947 | 0.483 | 0.442 |
| ATM     | 7.48E-51 | 0.333106857 | 0.525 | 0.482 |
| NCOA7   | 3.73E-50 | 0.367561276 | 0.342 | 0.284 |
| NUP98   | 2.25E-49 | 0.260942047 | 0.575 | 0.541 |
| NOSIP   | 3.02E-49 | 0.333956643 | 0.288 | 0.234 |
| CMTM7   | 1.22E-48 | 0.335906269 | 0.439 | 0.387 |
| FGD3    | 1.33E-48 | 0.284461035 | 0.321 | 0.255 |
| LRRC8D  | 1.50E-48 | 0.42862288  | 0.266 | 0.208 |
| CENPC   | 2.38E-48 | 0.295276482 | 0.49  | 0.441 |
| FILIP1L | 3.50E-48 | 0.68359954  | 0.394 | 0.337 |
| RNASET2 | 5.91E-48 | 0.251917061 | 0.592 | 0.549 |
| RAB11A  | 1.08E-47 | 0.30385809  | 0.639 | 0.61  |
| YME1L1  | 1.27E-47 | 0.292506081 | 0.556 | 0.532 |
| UTY     | 3.50E-46 | 0.314508189 | 0.407 | 0.344 |



|            |          |             |       |       |
|------------|----------|-------------|-------|-------|
| CDV3       | 3.57E-46 | 0.277071622 | 0.615 | 0.598 |
| BCLAF1     | 1.07E-45 | 0.264189189 | 0.581 | 0.562 |
| PPP1R10    | 3.73E-45 | 0.263501541 | 0.6   | 0.583 |
| PCED1B-AS1 | 4.26E-45 | 0.258799075 | 0.5   | 0.451 |
| SESN1      | 1.54E-44 | 0.486150478 | 0.314 | 0.26  |
| PRPF38B    | 2.67E-44 | 0.288497375 | 0.498 | 0.47  |
| MORC3      | 3.13E-44 | 0.326885355 | 0.383 | 0.334 |
| HNRNPUL1   | 3.59E-44 | 0.275186806 | 0.535 | 0.511 |
| HECTD1     | 4.51E-44 | 0.451773161 | 0.461 | 0.434 |
| METTL16    | 4.56E-44 | 0.300190229 | 0.325 | 0.267 |
| PLIN2      | 1.48E-43 | 0.482697255 | 0.423 | 0.367 |
| COG5       | 2.14E-43 | 0.323624256 | 0.516 | 0.481 |
| TBCC       | 7.09E-43 | 0.271744885 | 0.275 | 0.217 |
| HBP1       | 1.02E-42 | 0.303192952 | 0.438 | 0.4   |
| KLF3       | 1.69E-42 | 0.34008156  | 0.292 | 0.236 |
| BCL2       | 2.88E-42 | 0.288414837 | 0.592 | 0.546 |
| CEP85L     | 3.44E-42 | 0.299883476 | 0.43  | 0.379 |
| BRD9       | 4.10E-42 | 0.316686499 | 0.259 | 0.205 |
| OXCT1      | 2.33E-41 | 0.280970862 | 0.335 | 0.275 |
| RBL2       | 5.98E-41 | 0.272565642 | 0.296 | 0.239 |
| TSPAN14    | 1.11E-40 | 0.275901361 | 0.346 | 0.293 |
| RGS1       | 1.51E-40 | 0.327328429 | 0.659 | 0.62  |
| STT3B      | 1.77E-40 | 0.314436634 | 0.466 | 0.436 |
| DHX9       | 6.65E-40 | 0.269516146 | 0.452 | 0.415 |
| SETD2      | 7.70E-40 | 0.287700857 | 0.555 | 0.528 |
| ANKH       | 8.22E-40 | 0.27633265  | 0.324 | 0.269 |
| GADD45A    | 3.17E-39 | 0.40380286  | 0.309 | 0.257 |
| CAMK1D     | 3.27E-39 | 0.307218105 | 0.6   | 0.566 |
| NR1D2      | 3.68E-39 | 0.313692726 | 0.345 | 0.296 |
| NLRC5      | 1.77E-38 | 0.267335835 | 0.346 | 0.291 |
| KLF9       | 1.31E-37 | 0.279327642 | 0.271 | 0.22  |
| CHD3       | 1.52E-37 | 0.260598311 | 0.267 | 0.217 |
| IKZF3      | 2.72E-37 | 0.250569966 | 0.476 | 0.413 |
| ANKRD13C   | 5.38E-37 | 0.332727761 | 0.317 | 0.266 |
| ARL6IP5    | 7.70E-37 | 0.260562063 | 0.619 | 0.597 |
| INPP4A     | 3.96E-36 | 0.305589101 | 0.305 | 0.257 |
| CUTA       | 4.59E-36 | 0.26222891  | 0.452 | 0.429 |
| SLC25A26   | 7.44E-36 | 0.252629477 | 0.434 | 0.389 |
| RNF138     | 1.13E-35 | 0.314723525 | 0.354 | 0.308 |
| POR        | 1.16E-35 | 0.297605994 | 0.284 | 0.239 |
| LMNA       | 6.04E-35 | 0.357141302 | 0.484 | 0.438 |
| CITED2     | 1.92E-34 | 0.334229376 | 0.349 | 0.306 |
| USP36      | 2.15E-34 | 0.303432687 | 0.462 | 0.432 |

|            |          |             |       |       |
|------------|----------|-------------|-------|-------|
| SBDS       | 2.75E-34 | 0.261825469 | 0.379 | 0.343 |
| VSIR       | 5.28E-34 | 0.265181726 | 0.3   | 0.257 |
| IL2RG      | 4.72E-33 | 0.259922428 | 0.497 | 0.463 |
| TRPS1      | 1.07E-32 | 0.312508362 | 0.516 | 0.47  |
| PIM2       | 1.27E-32 | 0.278897216 | 0.276 | 0.232 |
| P2RY8      | 1.35E-32 | 0.36479524  | 0.374 | 0.33  |
| SLC16A1    | 1.68E-32 | 0.348379651 | 0.277 | 0.231 |
| DDX3Y      | 5.18E-32 | 0.250032978 | 0.374 | 0.324 |
| NLRP1      | 2.43E-31 | 0.260483174 | 0.301 | 0.253 |
| AHR        | 3.85E-31 | 0.260236077 | 0.43  | 0.382 |
| HDAC4      | 3.11E-30 | 0.267305516 | 0.418 | 0.38  |
| ISCA1      | 3.12E-30 | 0.253332822 | 0.336 | 0.297 |
| PPIL4      | 3.16E-30 | 0.261680405 | 0.364 | 0.33  |
| ZC3H7A     | 5.63E-30 | 0.296820016 | 0.348 | 0.313 |
| EPSTI1     | 2.75E-29 | 0.460626569 | 0.458 | 0.447 |
| RFFL       | 6.12E-29 | 0.275597687 | 0.261 | 0.219 |
| RANBP9     | 9.59E-29 | 0.254340185 | 0.415 | 0.381 |
| RPRD2      | 1.94E-28 | 0.293636892 | 0.337 | 0.296 |
| TOX        | 2.04E-28 | 0.315653205 | 0.424 | 0.364 |
| AEBP2      | 1.71E-26 | 0.283434004 | 0.319 | 0.283 |
| GRAMD1B    | 2.65E-26 | 0.281495205 | 0.291 | 0.245 |
| SMARCA2    | 4.70E-26 | 0.256606635 | 0.532 | 0.513 |
| AKIRIN1    | 6.83E-26 | 0.252887387 | 0.334 | 0.302 |
| MAN2A1     | 1.18E-25 | 0.382619161 | 0.474 | 0.464 |
| H2AFZ      | 3.25E-25 | 0.268861767 | 0.612 | 0.609 |
| PHLDA1     | 7.49E-25 | 0.285644738 | 0.287 | 0.246 |
| HBS1L      | 4.82E-24 | 0.263291656 | 0.328 | 0.297 |
| SPG7       | 5.52E-24 | 0.262307706 | 0.317 | 0.288 |
| IMMP2L     | 1.26E-23 | 0.321175692 | 0.345 | 0.305 |
| ARHGAP5    | 1.78E-23 | 0.330299053 | 0.265 | 0.23  |
| PDCL3      | 2.50E-23 | 0.281289054 | 0.306 | 0.273 |
| AC087286.2 | 7.75E-23 | 0.300883316 | 0.301 | 0.269 |
| TP53BP2    | 1.71E-22 | 0.294479719 | 0.318 | 0.288 |
| AC016831.5 | 1.91E-22 | 0.278191869 | 0.324 | 0.296 |
| ATP9B      | 3.18E-22 | 0.25161665  | 0.447 | 0.426 |
| PRKAR2A    | 1.02E-21 | 0.275840093 | 0.377 | 0.351 |
| KAT2B      | 6.30E-21 | 0.265994261 | 0.333 | 0.301 |
| ZNF609     | 9.25E-20 | 0.312291714 | 0.345 | 0.319 |
| IRF1       | 1.11E-19 | 0.270330064 | 0.554 | 0.551 |
| PIBF1      | 3.02E-19 | 0.257260702 | 0.317 | 0.285 |
| GLUD1      | 4.04E-19 | 0.267665645 | 0.431 | 0.412 |
| EXOC6B     | 4.72E-19 | 0.253495504 | 0.267 | 0.234 |
| CAPN7      | 1.77E-18 | 0.254456047 | 0.362 | 0.343 |

|           |          |             |       |       |
|-----------|----------|-------------|-------|-------|
| REEP3     | 1.92E-18 | 0.272966418 | 0.256 | 0.23  |
| SGK3      | 7.84E-17 | 0.290052622 | 0.253 | 0.23  |
| ADAM10    | 1.15E-15 | 0.251551462 | 0.392 | 0.381 |
| NPC1      | 2.02E-15 | 0.261677987 | 0.364 | 0.344 |
| TGFBR2    | 1.34E-14 | 0.261560033 | 0.456 | 0.446 |
| RNF168    | 6.26E-13 | 0.268006518 | 0.325 | 0.312 |
| KLF2      | 8.41E-13 | 0.492851019 | 0.477 | 0.502 |
| NFE2L3    | 3.90E-12 | 0.301524391 | 0.291 | 0.275 |
| IFNAR2    | 6.69E-12 | 0.271533516 | 0.325 | 0.32  |
| CARD16    | 8.01E-12 | 0.374300046 | 0.362 | 0.359 |
| DNPH1     | 6.64E-11 | 0.256714717 | 0.268 | 0.255 |
| BTD       | 3.37E-10 | 0.332826358 | 0.296 | 0.283 |
| BTG3      | 2.67E-07 | 0.277589826 | 0.311 | 0.31  |
| GNLY      | 0        | 4.438402828 | 0.502 | 0.054 |
| NKG7      | 0        | 3.64031138  | 0.888 | 0.106 |
| CCL5      | 0        | 3.613315521 | 0.958 | 0.18  |
| CCL4      | 0        | 3.161510858 | 0.807 | 0.203 |
| GZMB      | 0        | 3.151848903 | 0.736 | 0.076 |
| GZMA      | 0        | 3.131885639 | 0.806 | 0.096 |
| CCL4L2    | 0        | 2.746859714 | 0.476 | 0.118 |
| GZMH      | 0        | 2.631540726 | 0.599 | 0.035 |
| IFNG      | 0        | 2.620134721 | 0.494 | 0.042 |
| KLRD1     | 0        | 2.311829894 | 0.511 | 0.051 |
| GZMK      | 0        | 2.19106528  | 0.557 | 0.079 |
| PRF1      | 0        | 2.138484822 | 0.619 | 0.073 |
| CRTAM     | 0        | 2.033578249 | 0.458 | 0.056 |
| XCL2      | 0        | 1.93385282  | 0.286 | 0.016 |
| LINC02446 | 0        | 1.909447192 | 0.313 | 0.017 |
| CST7      | 0        | 1.893276738 | 0.799 | 0.247 |
| CD8A      | 0        | 1.886521083 | 0.592 | 0.053 |
| CXCL13    | 0        | 1.835707035 | 0.365 | 0.076 |
| KLRK1     | 0        | 1.833676213 | 0.64  | 0.048 |
| AOAH      | 0        | 1.765642139 | 0.527 | 0.173 |
| KLRC1     | 0        | 1.733240748 | 0.272 | 0.01  |
| KLRC2     | 0        | 1.716422947 | 0.309 | 0.011 |
| CD8B      | 0        | 1.642179105 | 0.48  | 0.041 |
| CTSW      | 0        | 1.627662575 | 0.415 | 0.033 |
| ATP8B4    | 0        | 1.604850904 | 0.413 | 0.101 |
| LINC01871 | 0        | 1.522770002 | 0.517 | 0.074 |
| APOBEC3G  | 0        | 1.426004479 | 0.586 | 0.187 |
| HCST      | 0        | 1.414285688 | 0.835 | 0.424 |
| SLA2      | 0        | 1.353721251 | 0.517 | 0.108 |
| CMC1      | 0        | 1.346178848 | 0.483 | 0.2   |

|            |   |             |       |       |
|------------|---|-------------|-------|-------|
| DTHD1      | 0 | 1.34162707  | 0.471 | 0.086 |
| TRGC2      | 0 | 1.323089304 | 0.379 | 0.039 |
| LAG3       | 0 | 1.316734611 | 0.421 | 0.078 |
| CBLB       | 0 | 1.308405731 | 0.927 | 0.603 |
| ID2        | 0 | 1.297196534 | 0.835 | 0.422 |
| KLRC3      | 0 | 1.282064829 | 0.284 | 0.01  |
| SAMD3      | 0 | 1.25845126  | 0.452 | 0.08  |
| CD3G1      | 0 | 1.23010987  | 0.713 | 0.341 |
| CD71       | 0 | 1.223676529 | 0.748 | 0.323 |
| THEMIS1    | 0 | 1.20804378  | 0.533 | 0.18  |
| NCALD      | 0 | 1.20788492  | 0.531 | 0.156 |
| PLAAT4     | 0 | 1.20537462  | 0.715 | 0.332 |
| HOPX       | 0 | 1.202489917 | 0.342 | 0.056 |
| RAB27A     | 0 | 1.201388608 | 0.647 | 0.283 |
| LYST       | 0 | 1.199200628 | 0.707 | 0.435 |
| CD3D1      | 0 | 1.197000049 | 0.779 | 0.417 |
| ITGA1      | 0 | 1.196512141 | 0.372 | 0.047 |
| NELL2      | 0 | 1.181875101 | 0.336 | 0.085 |
| HAVCR2     | 0 | 1.175165573 | 0.392 | 0.17  |
| PDE3B1     | 0 | 1.155186714 | 0.843 | 0.526 |
| CCL3       | 0 | 1.145050476 | 0.301 | 0.117 |
| CD961      | 0 | 1.115345189 | 0.839 | 0.405 |
| ITGAE      | 0 | 1.110468897 | 0.525 | 0.247 |
| PARP81     | 0 | 1.098733196 | 0.876 | 0.582 |
| GZMM       | 0 | 1.097721037 | 0.532 | 0.152 |
| CLEC2B     | 0 | 1.092784305 | 0.71  | 0.377 |
| SYTL31     | 0 | 1.088940427 | 0.917 | 0.604 |
| LINC019341 | 0 | 1.072172034 | 0.543 | 0.2   |
| SLFN12L    | 0 | 1.068204649 | 0.547 | 0.18  |
| DUSP2      | 0 | 1.057823252 | 0.737 | 0.471 |
| RUNX3      | 0 | 1.053735281 | 0.827 | 0.51  |
| SYTL2      | 0 | 1.037155574 | 0.409 | 0.098 |
| TNIP3      | 0 | 1.028671507 | 0.411 | 0.136 |
| TRG-AS1    | 0 | 0.997546052 | 0.37  | 0.107 |
| PTPN22     | 0 | 0.986452666 | 0.799 | 0.506 |
| SCML41     | 0 | 0.981947337 | 0.548 | 0.223 |
| PRKCH1     | 0 | 0.980314519 | 0.884 | 0.514 |
| PITPNC11   | 0 | 0.954666748 | 0.805 | 0.499 |
| PIK3R1     | 0 | 0.93651792  | 0.71  | 0.475 |
| PTMS       | 0 | 0.918952572 | 0.453 | 0.189 |
| AKNA       | 0 | 0.918689307 | 0.651 | 0.413 |
| PYHIN11    | 0 | 0.896942463 | 0.539 | 0.227 |
| AC243829.4 | 0 | 0.889632306 | 0.265 | 0.025 |

|          |   |             |       |       |
|----------|---|-------------|-------|-------|
| CMIP     | 0 | 0.886101724 | 0.718 | 0.484 |
| PPP2R2B  | 0 | 0.881016337 | 0.311 | 0.085 |
| METRNL   | 0 | 0.876583482 | 0.518 | 0.301 |
| ABCB1    | 0 | 0.868475371 | 0.336 | 0.086 |
| IFITM2   | 0 | 0.867058747 | 0.806 | 0.591 |
| SUPT3H   | 0 | 0.86303363  | 0.521 | 0.282 |
| PIP4K2A  | 0 | 0.862778209 | 0.796 | 0.563 |
| CCSER21  | 0 | 0.862416001 | 0.778 | 0.498 |
| MVB12B   | 0 | 0.859378772 | 0.371 | 0.106 |
| CHST12   | 0 | 0.855841604 | 0.371 | 0.117 |
| CD3E1    | 0 | 0.851789281 | 0.759 | 0.372 |
| YES1     | 0 | 0.849260328 | 0.314 | 0.099 |
| TOX1     | 0 | 0.848735432 | 0.637 | 0.316 |
| SLA1     | 0 | 0.848666713 | 0.762 | 0.461 |
| EVL1     | 0 | 0.837269294 | 0.758 | 0.477 |
| FYN1     | 0 | 0.83529833  | 0.975 | 0.628 |
| LY6E     | 0 | 0.828276747 | 0.615 | 0.408 |
| ATP8A1   | 0 | 0.824908464 | 0.661 | 0.381 |
| DAPK2    | 0 | 0.820853034 | 0.284 | 0.075 |
| CLIC3    | 0 | 0.808047972 | 0.251 | 0.037 |
| LYAR     | 0 | 0.795494738 | 0.391 | 0.16  |
| PRKCQ1   | 0 | 0.784166089 | 0.569 | 0.256 |
| GPR1711  | 0 | 0.773746596 | 0.435 | 0.139 |
| IKZF31   | 0 | 0.77318137  | 0.644 | 0.375 |
| SYNE1    | 0 | 0.766877233 | 0.524 | 0.281 |
| PRKX     | 0 | 0.764087729 | 0.458 | 0.244 |
| SFMBT2   | 0 | 0.76015673  | 0.581 | 0.344 |
| ITM2A1   | 0 | 0.74972895  | 0.588 | 0.289 |
| CD99     | 0 | 0.749474011 | 0.753 | 0.517 |
| MSN      | 0 | 0.748126766 | 0.803 | 0.598 |
| SH3BGRL3 | 0 | 0.747029123 | 0.921 | 0.761 |
| PLAAT3   | 0 | 0.745920649 | 0.346 | 0.099 |
| OASL     | 0 | 0.7453904   | 0.301 | 0.113 |
| GALNT11  | 0 | 0.742553589 | 0.402 | 0.22  |
| GFOD1    | 0 | 0.734831409 | 0.372 | 0.159 |
| SRGAP3   | 0 | 0.734637111 | 0.256 | 0.092 |
| BICDL11  | 0 | 0.733645714 | 0.64  | 0.358 |
| ITGA4    | 0 | 0.732395271 | 0.649 | 0.431 |
| CD21     | 0 | 0.730669959 | 0.837 | 0.428 |
| TRAC1    | 0 | 0.720919945 | 0.685 | 0.389 |
| SLFN51   | 0 | 0.710776705 | 0.502 | 0.273 |
| TRAT11   | 0 | 0.710057724 | 0.387 | 0.153 |
| APBA2    | 0 | 0.703003816 | 0.268 | 0.089 |

|             |   |             |       |       |
|-------------|---|-------------|-------|-------|
| KIF21A      | 0 | 0.696062327 | 0.311 | 0.103 |
| ANXA11      | 0 | 0.695883616 | 0.619 | 0.386 |
| ATXN11      | 0 | 0.694501674 | 0.862 | 0.642 |
| DUSP4       | 0 | 0.693986005 | 0.566 | 0.341 |
| GIMAP41     | 0 | 0.691862059 | 0.442 | 0.215 |
| RNF19A1     | 0 | 0.690063517 | 0.818 | 0.588 |
| NFATC2      | 0 | 0.687779718 | 0.519 | 0.317 |
| TGFBR3      | 0 | 0.684934326 | 0.296 | 0.116 |
| TRBC11      | 0 | 0.676549183 | 0.535 | 0.249 |
| ALOX5AP     | 0 | 0.667553186 | 0.572 | 0.347 |
| ZEB2        | 0 | 0.665609539 | 0.715 | 0.405 |
| SLC7A5      | 0 | 0.656122899 | 0.62  | 0.389 |
| ZFYVE28     | 0 | 0.655776994 | 0.368 | 0.166 |
| STAT41      | 0 | 0.654179312 | 0.785 | 0.568 |
| ADGRE5      | 0 | 0.651329223 | 0.739 | 0.523 |
| PAXX        | 0 | 0.651016872 | 0.497 | 0.276 |
| SLF1        | 0 | 0.647981386 | 0.281 | 0.103 |
| CRIP1       | 0 | 0.646944596 | 0.877 | 0.674 |
| ABHD17A     | 0 | 0.645668443 | 0.517 | 0.314 |
| NAP1L41     | 0 | 0.639444722 | 0.732 | 0.542 |
| PPP1R16B1   | 0 | 0.639239094 | 0.777 | 0.549 |
| CD2471      | 0 | 0.630441118 | 0.742 | 0.405 |
| GNG2        | 0 | 0.63011794  | 0.771 | 0.568 |
| C12orf75    | 0 | 0.626466955 | 0.329 | 0.122 |
| PSMB9       | 0 | 0.625238834 | 0.689 | 0.513 |
| TRBC21      | 0 | 0.621759537 | 0.732 | 0.432 |
| SH2D1A      | 0 | 0.619704865 | 0.37  | 0.141 |
| PTPRC1      | 0 | 0.61501322  | 0.983 | 0.863 |
| HLA-C       | 0 | 0.612905174 | 0.982 | 0.892 |
| APMAP       | 0 | 0.610976885 | 0.351 | 0.172 |
| ETS11       | 0 | 0.609873854 | 0.899 | 0.595 |
| ECI2        | 0 | 0.606972041 | 0.304 | 0.134 |
| PCED1B-AS11 | 0 | 0.604058662 | 0.628 | 0.422 |
| GTDC1       | 0 | 0.602993161 | 0.502 | 0.288 |
| TRERF11     | 0 | 0.601987803 | 0.412 | 0.204 |
| SH2D2A      | 0 | 0.59363034  | 0.369 | 0.155 |
| IFITM1      | 0 | 0.590797818 | 0.329 | 0.153 |
| PDCD1       | 0 | 0.590280165 | 0.253 | 0.082 |
| MYL12A      | 0 | 0.588345804 | 0.811 | 0.691 |
| HLA-F       | 0 | 0.56855802  | 0.721 | 0.532 |
| BTN3A2      | 0 | 0.566872885 | 0.454 | 0.255 |
| EMB1        | 0 | 0.564103472 | 0.686 | 0.478 |
| IL2RB       | 0 | 0.558112403 | 0.338 | 0.134 |

|           |           |             |       |       |
|-----------|-----------|-------------|-------|-------|
| INPP4B1   | 0         | 0.55165792  | 0.558 | 0.297 |
| OXNAD11   | 0         | 0.544995306 | 0.608 | 0.389 |
| HLA-A1    | 0         | 0.54412678  | 0.991 | 0.908 |
| MRPL10    | 0         | 0.53812995  | 0.291 | 0.119 |
| LCK1      | 0         | 0.537356251 | 0.536 | 0.282 |
| RABGAP1L  | 0         | 0.536071738 | 0.903 | 0.769 |
| GPR174    | 0         | 0.525862636 | 0.281 | 0.11  |
| NIBAN11   | 0         | 0.52309701  | 0.801 | 0.516 |
| IL321     | 0         | 0.520746266 | 0.851 | 0.428 |
| GIMAP71   | 0         | 0.51908789  | 0.476 | 0.235 |
| TSEN54    | 0         | 0.511220389 | 0.291 | 0.112 |
| TNFAIP31  | 0         | 0.505237172 | 0.881 | 0.676 |
| RNF213    | 0         | 0.500339508 | 0.761 | 0.591 |
| MCTP2     | 0         | 0.498765665 | 0.417 | 0.176 |
| B2M1      | 0         | 0.491676016 | 0.998 | 0.974 |
| SEPTIN7   | 0         | 0.490930544 | 0.856 | 0.716 |
| SKAP11    | 0         | 0.484147103 | 0.803 | 0.466 |
| TMSB4X    | 0         | 0.455357336 | 0.991 | 0.943 |
| LEPROTL11 | 0         | 0.448817349 | 0.799 | 0.573 |
| HLA-B     | 0         | 0.437235957 | 0.99  | 0.927 |
| LCP1      | 0         | 0.410542622 | 0.801 | 0.616 |
| SYNE21    | 0         | 0.39336272  | 0.807 | 0.547 |
| TIGIT1    | 0         | 0.390082717 | 0.516 | 0.266 |
| CD63      | 0         | 0.389794067 | 0.644 | 0.415 |
| SAMSN1    | 9.10E-308 | 0.387385329 | 0.864 | 0.708 |
| RNF1251   | 2.06E-307 | 0.629533448 | 0.572 | 0.341 |
| TNFSF9    | 1.21E-305 | 0.770077131 | 0.251 | 0.1   |
| ZBED4     | 3.71E-305 | 0.557332275 | 0.338 | 0.16  |
| SLC38A1   | 6.04E-304 | 0.521607462 | 0.77  | 0.581 |
| ABLIM11   | 4.91E-300 | 0.743546354 | 0.547 | 0.335 |
| CKLF      | 4.41E-298 | 0.605950882 | 0.564 | 0.369 |
| STAT5B1   | 7.71E-297 | 0.608127869 | 0.579 | 0.377 |
| GALM1     | 6.90E-294 | 0.623367983 | 0.588 | 0.391 |
| SIRPG     | 3.53E-292 | 0.54663497  | 0.276 | 0.115 |
| JAML      | 1.66E-290 | 0.59596577  | 0.358 | 0.179 |
| TBCD      | 2.95E-290 | 0.558156161 | 0.297 | 0.136 |
| RALGAPA1  | 1.48E-289 | 0.800858915 | 0.742 | 0.595 |
| DRAP1     | 2.09E-289 | 0.650024629 | 0.586 | 0.422 |
| CYTOR     | 3.89E-284 | 0.427898586 | 0.653 | 0.435 |
| CAMK41    | 6.50E-284 | 0.497756743 | 0.583 | 0.343 |
| SRSF71    | 2.24E-283 | 0.533186967 | 0.887 | 0.769 |
| HMGB1     | 7.03E-282 | 0.361755446 | 0.933 | 0.842 |
| PPP2R5C1  | 3.24E-280 | 0.44156925  | 0.883 | 0.743 |

|            |           |             |       |       |
|------------|-----------|-------------|-------|-------|
| GABARAPL1  | 1.76E-278 | 0.612393491 | 0.443 | 0.263 |
| IL2RG1     | 1.80E-276 | 0.475084825 | 0.624 | 0.434 |
| ATP2B41    | 2.77E-274 | 0.587306281 | 0.473 | 0.28  |
| PTPRJ      | 1.36E-272 | 0.509661044 | 0.624 | 0.415 |
| MAPRE2     | 1.76E-271 | 0.726365813 | 0.612 | 0.436 |
| MYL12B     | 3.13E-271 | 0.418850899 | 0.815 | 0.683 |
| PTPN4      | 4.78E-271 | 0.494123814 | 0.464 | 0.265 |
| CFL1       | 1.24E-267 | 0.380655878 | 0.924 | 0.806 |
| RIN3       | 6.14E-266 | 0.590778181 | 0.402 | 0.224 |
| CNOT6L1    | 2.28E-265 | 0.346339119 | 0.912 | 0.724 |
| H3F3B      | 3.64E-264 | 0.401961444 | 0.98  | 0.912 |
| UBB        | 3.57E-261 | 0.467128074 | 0.933 | 0.831 |
| CD2261     | 1.58E-260 | 0.608976562 | 0.335 | 0.169 |
| TG         | 8.93E-260 | 0.510964541 | 0.348 | 0.177 |
| CDK17      | 4.29E-259 | 0.622233341 | 0.683 | 0.526 |
| PRKACB     | 8.20E-259 | 0.62454406  | 0.46  | 0.281 |
| STOM       | 3.22E-258 | 0.558520787 | 0.329 | 0.169 |
| MLLT31     | 8.56E-258 | 0.576019375 | 0.468 | 0.27  |
| LRBA       | 3.25E-257 | 0.510021634 | 0.785 | 0.634 |
| OPTN       | 1.14E-256 | 0.491610562 | 0.482 | 0.294 |
| CD52       | 3.35E-256 | 0.542288835 | 0.81  | 0.64  |
| BCL11B1    | 2.58E-255 | 0.319546437 | 0.666 | 0.397 |
| CEMIP21    | 8.93E-255 | 0.569352192 | 0.804 | 0.644 |
| PAM        | 1.13E-254 | 0.620685223 | 0.525 | 0.337 |
| ZAP70      | 1.66E-254 | 0.395890795 | 0.261 | 0.112 |
| CD81       | 9.71E-254 | 0.41066175  | 0.666 | 0.49  |
| CXCR6      | 3.21E-253 | 0.522195099 | 0.273 | 0.118 |
| SLAMF6     | 5.69E-251 | 0.500117474 | 0.309 | 0.148 |
| GALNT2     | 3.47E-250 | 0.765170233 | 0.453 | 0.294 |
| MGAT4A1    | 4.84E-250 | 0.506859584 | 0.492 | 0.303 |
| MNAT1      | 4.10E-249 | 0.53341082  | 0.429 | 0.254 |
| HLA-E      | 1.20E-246 | 0.359940459 | 0.955 | 0.868 |
| AL137856.1 | 1.55E-246 | 0.530858825 | 0.373 | 0.201 |
| ISG15      | 4.68E-245 | 0.761352296 | 0.585 | 0.418 |
| FABP5      | 1.42E-244 | 0.485515716 | 0.498 | 0.324 |
| BIN2       | 4.14E-244 | 0.560832957 | 0.421 | 0.257 |
| PSME1      | 1.75E-242 | 0.426290407 | 0.738 | 0.605 |
| AF165147.1 | 1.78E-242 | 0.553965363 | 0.28  | 0.127 |
| CLEC2D1    | 8.65E-242 | 0.579513607 | 0.686 | 0.503 |
| HMGB2      | 6.67E-240 | 0.531699822 | 0.583 | 0.418 |
| MYO1F      | 6.95E-240 | 0.561173477 | 0.369 | 0.21  |
| CD69       | 2.80E-239 | 0.490485241 | 0.739 | 0.538 |
| RNF115     | 4.79E-238 | 0.599018954 | 0.498 | 0.338 |



|          |           |             |       |       |
|----------|-----------|-------------|-------|-------|
| CALM11   | 6.08E-238 | 0.385822937 | 0.953 | 0.856 |
| CLDND1   | 7.91E-238 | 0.623898763 | 0.456 | 0.295 |
| WNK1     | 1.14E-234 | 0.530425478 | 0.723 | 0.59  |
| GRAP2    | 2.83E-233 | 0.455510103 | 0.28  | 0.13  |
| PSTPIP1  | 1.47E-231 | 0.435138875 | 0.29  | 0.143 |
| FUT8     | 1.87E-231 | 0.68462246  | 0.509 | 0.353 |
| GAPDH    | 1.31E-228 | 0.339931878 | 0.926 | 0.821 |
| APOBEC3C | 1.68E-228 | 0.527880764 | 0.308 | 0.163 |
| RASAL3   | 4.42E-228 | 0.46921508  | 0.382 | 0.22  |
| KIF13B   | 2.66E-227 | 0.543316477 | 0.537 | 0.371 |
| ARAP21   | 1.53E-225 | 0.410595112 | 0.636 | 0.448 |
| PTPN7    | 1.16E-224 | 0.52259387  | 0.424 | 0.26  |
| RABAC1   | 5.95E-224 | 0.479352085 | 0.577 | 0.429 |
| TC2N1    | 1.60E-223 | 0.502697269 | 0.374 | 0.2   |
| CARD11   | 2.17E-223 | 0.535477345 | 0.532 | 0.355 |
| SPN      | 6.25E-223 | 0.440204893 | 0.274 | 0.134 |
| DOK2     | 3.41E-222 | 0.574759962 | 0.402 | 0.241 |
| SPON2    | 3.66E-222 | 0.608438935 | 0.257 | 0.121 |
| JMJD6    | 7.87E-222 | 0.570679462 | 0.404 | 0.253 |
| SAMD9    | 6.36E-218 | 0.569207674 | 0.421 | 0.262 |
| ITGAL    | 1.28E-214 | 0.520564807 | 0.368 | 0.212 |
| CORO1A   | 2.77E-214 | 0.425760862 | 0.732 | 0.594 |
| DGKZ     | 7.44E-214 | 0.434575852 | 0.298 | 0.156 |
| ACAP11   | 7.68E-214 | 0.442961839 | 0.601 | 0.433 |
| MACF1    | 9.24E-212 | 0.456107206 | 0.662 | 0.507 |
| TUBA4A   | 1.70E-211 | 0.637255981 | 0.558 | 0.4   |
| GIMAP1   | 1.71E-210 | 0.408215228 | 0.258 | 0.122 |
| HERPUD2  | 1.13E-209 | 0.527774655 | 0.499 | 0.344 |
| CLIC1    | 1.21E-209 | 0.381800212 | 0.783 | 0.646 |
| KLF13    | 9.74E-208 | 0.506920291 | 0.53  | 0.383 |
| BTN3A1   | 6.77E-207 | 0.460966805 | 0.358 | 0.205 |
| GUK1     | 1.19E-206 | 0.37485269  | 0.684 | 0.554 |
| LDHA     | 1.34E-206 | 0.429401751 | 0.709 | 0.563 |
| GAS7     | 2.01E-206 | 0.539686025 | 0.254 | 0.122 |
| DENND2D  | 6.15E-204 | 0.418386894 | 0.282 | 0.143 |
| RAB5IF   | 3.31E-201 | 0.515560396 | 0.472 | 0.33  |
| ISG20    | 5.65E-201 | 0.509607184 | 0.822 | 0.7   |
| IER5L    | 1.05E-200 | 0.672217741 | 0.331 | 0.187 |
| MPZL31   | 1.42E-200 | 0.482875229 | 0.379 | 0.218 |
| AHI1     | 7.56E-199 | 0.651922963 | 0.492 | 0.342 |
| MBNL11   | 2.75E-198 | 0.306838407 | 0.941 | 0.853 |
| SELPLG   | 3.35E-198 | 0.496675022 | 0.331 | 0.191 |
| MCOLN2   | 1.18E-197 | 0.563661218 | 0.317 | 0.171 |

|          |           |             |       |       |
|----------|-----------|-------------|-------|-------|
| DOCK8    | 1.02E-195 | 0.382085433 | 0.784 | 0.674 |
| TBC1D2B  | 1.65E-195 | 0.473765082 | 0.332 | 0.187 |
| RAC2     | 9.77E-195 | 0.382086598 | 0.671 | 0.526 |
| PLPP1    | 3.31E-194 | 0.841705697 | 0.287 | 0.155 |
| CCDC85B  | 1.10E-193 | 0.456290116 | 0.487 | 0.343 |
| ACTN4    | 1.38E-191 | 0.450154003 | 0.509 | 0.363 |
| MPHOSPH9 | 4.72E-190 | 0.456825387 | 0.287 | 0.153 |
| C5orf56  | 3.59E-189 | 0.482068864 | 0.376 | 0.232 |
| IFI16    | 3.41E-188 | 0.434934731 | 0.731 | 0.619 |
| OTULIN   | 6.05E-188 | 0.519284353 | 0.448 | 0.303 |
| TSPAN51  | 9.37E-188 | 0.35082768  | 0.491 | 0.304 |
| BUB3     | 5.47E-187 | 0.441722423 | 0.448 | 0.302 |
| IFI44L   | 1.39E-186 | 0.701558532 | 0.291 | 0.159 |
| RBPJ     | 2.60E-186 | 0.53651377  | 0.608 | 0.478 |
| ARHGAP9  | 7.18E-185 | 0.481023499 | 0.396 | 0.253 |
| TNFRSF9  | 1.35E-184 | 0.443068745 | 0.285 | 0.147 |
| BIN1     | 1.86E-184 | 0.442949283 | 0.355 | 0.216 |
| TMEM50A  | 2.26E-184 | 0.422028099 | 0.598 | 0.462 |
| PFN1     | 5.76E-184 | 0.320247512 | 0.873 | 0.749 |
| PCNX21   | 3.11E-183 | 0.439883465 | 0.415 | 0.261 |
| IFI6     | 3.82E-183 | 0.675536004 | 0.446 | 0.299 |
| IQGAP1   | 6.14E-183 | 0.426011788 | 0.792 | 0.686 |
| PSMA1    | 1.67E-182 | 0.518821973 | 0.622 | 0.508 |
| SNTB2    | 1.96E-182 | 0.392782367 | 0.287 | 0.152 |
| SIRT2    | 8.32E-182 | 0.50897028  | 0.353 | 0.219 |
| GBP2     | 9.42E-182 | 0.41885227  | 0.545 | 0.375 |
| MFSD6    | 2.34E-180 | 0.45618417  | 0.346 | 0.203 |
| ARL4C1   | 1.20E-179 | 0.401938306 | 0.657 | 0.476 |
| CCND2    | 3.80E-178 | 0.44268075  | 0.463 | 0.311 |
| PPP2R5A  | 1.57E-177 | 0.461740314 | 0.418 | 0.273 |
| DIP2A    | 2.94E-177 | 0.459103656 | 0.337 | 0.199 |
| B3GNT2   | 1.49E-176 | 0.454127272 | 0.283 | 0.156 |
| TERF2IP  | 5.35E-176 | 0.437121131 | 0.641 | 0.52  |
| BRD1     | 7.46E-176 | 0.455999286 | 0.426 | 0.285 |
| PDCD41   | 8.07E-173 | 0.339947843 | 0.739 | 0.6   |
| NCOA1    | 6.08E-172 | 0.441484322 | 0.633 | 0.497 |
| AUTS2    | 2.85E-170 | 0.489025981 | 0.431 | 0.269 |
| GPR65    | 4.47E-168 | 0.46266078  | 0.359 | 0.223 |
| NAA50    | 1.34E-167 | 0.503548883 | 0.532 | 0.402 |
| ARPC5L   | 3.01E-165 | 0.440113699 | 0.386 | 0.258 |
| CNOT2    | 6.76E-165 | 0.570513159 | 0.638 | 0.534 |
| ARHGEF1  | 1.06E-164 | 0.397883002 | 0.464 | 0.32  |
| PCED1B   | 3.09E-161 | 0.47081809  | 0.468 | 0.316 |

|            |           |             |       |       |
|------------|-----------|-------------|-------|-------|
| WHRN       | 3.09E-161 | 0.515486683 | 0.308 | 0.18  |
| LSP1       | 5.69E-160 | 0.355860061 | 0.572 | 0.443 |
| RASA2      | 6.36E-160 | 0.3873393   | 0.655 | 0.525 |
| ABI3       | 5.11E-159 | 0.403581539 | 0.268 | 0.149 |
| RESF1      | 2.26E-158 | 0.372686091 | 0.675 | 0.539 |
| SAMD9L     | 3.88E-158 | 0.54209381  | 0.352 | 0.224 |
| BST2       | 1.22E-157 | 0.509378368 | 0.526 | 0.405 |
| AKT31      | 3.40E-157 | 0.48996581  | 0.617 | 0.481 |
| SPATA131   | 1.36E-156 | 0.372078618 | 0.375 | 0.238 |
| PDE7B      | 1.98E-156 | 0.676605495 | 0.251 | 0.134 |
| IDH2       | 3.63E-156 | 0.460220458 | 0.365 | 0.244 |
| PSMB8      | 6.24E-155 | 0.397373976 | 0.574 | 0.452 |
| IFI44      | 9.02E-154 | 0.550705109 | 0.279 | 0.163 |
| ARHGEF31   | 9.89E-154 | 0.378666638 | 0.43  | 0.285 |
| TNFSF10    | 9.99E-154 | 0.470198067 | 0.322 | 0.196 |
| CD61       | 2.55E-153 | 0.324102014 | 0.406 | 0.249 |
| AC011476.3 | 2.58E-153 | 0.457825345 | 0.284 | 0.162 |
| GATA31     | 4.14E-152 | 0.32403175  | 0.289 | 0.157 |
| ARPC2      | 4.18E-152 | 0.265955781 | 0.862 | 0.764 |
| GRAMD1B1   | 1.04E-149 | 0.485945929 | 0.365 | 0.228 |
| CASP81     | 5.85E-149 | 0.362986508 | 0.566 | 0.425 |
| DGKH       | 3.76E-148 | 0.497157107 | 0.287 | 0.167 |
| HCP5       | 3.84E-148 | 0.417017531 | 0.343 | 0.219 |
| STK17A     | 7.18E-148 | 0.289398232 | 0.763 | 0.624 |
| UTRN       | 1.28E-146 | 0.303455543 | 0.802 | 0.683 |
| CHST11     | 6.08E-145 | 0.275521374 | 0.86  | 0.743 |
| TSPYL21    | 1.67E-144 | 0.506011087 | 0.596 | 0.47  |
| PGK1       | 2.36E-144 | 0.400481829 | 0.674 | 0.573 |
| TBC1D10C   | 2.42E-144 | 0.371300234 | 0.369 | 0.236 |
| WIPF1      | 4.04E-144 | 0.328709489 | 0.72  | 0.61  |
| CARS       | 5.12E-144 | 0.563736543 | 0.281 | 0.17  |
| IKZF11     | 5.44E-144 | 0.26349231  | 0.731 | 0.593 |
| DDX3X      | 3.15E-143 | 0.383528449 | 0.757 | 0.671 |
| AAK11      | 1.31E-142 | 0.253309221 | 0.606 | 0.44  |
| PEX14      | 7.88E-142 | 0.463604395 | 0.298 | 0.181 |
| LRMP       | 3.65E-141 | 0.335352363 | 0.369 | 0.24  |
| KANSL11    | 1.25E-140 | 0.374419554 | 0.642 | 0.518 |
| FAM160B1   | 1.86E-140 | 0.39531508  | 0.302 | 0.18  |
| PCID2      | 2.08E-140 | 0.381536123 | 0.252 | 0.142 |
| EIF2AK2    | 2.42E-140 | 0.474216252 | 0.429 | 0.309 |
| CLASP1     | 6.51E-139 | 0.404135387 | 0.529 | 0.409 |
| KLRB11     | 7.19E-139 | 0.596760764 | 0.27  | 0.15  |
| AL627171.2 | 2.86E-138 | 0.366343129 | 0.45  | 0.329 |

|          |           |             |       |       |
|----------|-----------|-------------|-------|-------|
| LBH1     | 3.59E-138 | 0.348388049 | 0.491 | 0.344 |
| UBE2S    | 2.80E-137 | 0.483125824 | 0.571 | 0.458 |
| HNRNPLL1 | 3.40E-137 | 0.397177064 | 0.443 | 0.301 |
| XAF1     | 6.92E-136 | 0.510292835 | 0.387 | 0.267 |
| FAM3C    | 2.35E-135 | 0.599950581 | 0.357 | 0.248 |
| RASGRP11 | 2.14E-134 | 0.337027487 | 0.417 | 0.273 |
| SPAG1    | 7.20E-134 | 0.391364624 | 0.284 | 0.168 |
| ARL6IP51 | 1.79E-133 | 0.298050738 | 0.708 | 0.577 |
| PPP1R12A | 5.04E-132 | 0.318842059 | 0.7   | 0.6   |
| SMC4     | 3.75E-131 | 0.459478124 | 0.373 | 0.257 |
| RAP1B    | 1.40E-130 | 0.258553555 | 0.847 | 0.758 |
| PPDPF    | 1.84E-130 | 0.351735888 | 0.52  | 0.409 |
| GIMAP51  | 7.09E-130 | 0.304662769 | 0.268 | 0.153 |
| SP140    | 8.64E-130 | 0.376053435 | 0.578 | 0.446 |
| LPIN21   | 1.22E-129 | 0.364597625 | 0.473 | 0.346 |
| SUN2     | 2.10E-129 | 0.410478346 | 0.373 | 0.256 |
| APOL6    | 4.32E-129 | 0.389848339 | 0.377 | 0.258 |
| GPRIN31  | 1.19E-127 | 0.256465628 | 0.553 | 0.398 |
| LIME11   | 1.43E-126 | 0.398621682 | 0.366 | 0.243 |
| GLMN     | 2.06E-125 | 0.349631127 | 0.306 | 0.188 |
| PRKY1    | 5.77E-125 | 0.450334982 | 0.277 | 0.167 |
| H1FX     | 6.54E-125 | 0.416053173 | 0.51  | 0.391 |
| YARS     | 1.25E-124 | 0.397158247 | 0.315 | 0.205 |
| SUB1     | 2.54E-123 | 0.278052567 | 0.824 | 0.737 |
| SMAD7    | 3.81E-123 | 0.390579444 | 0.458 | 0.336 |
| MAP2K2   | 6.12E-123 | 0.376766204 | 0.445 | 0.343 |
| PTPRA    | 1.53E-122 | 0.404815845 | 0.494 | 0.382 |
| ASXL2    | 2.61E-122 | 0.428456874 | 0.448 | 0.336 |
| DDX241   | 3.50E-122 | 0.257546733 | 0.798 | 0.692 |
| RNF38    | 4.77E-121 | 0.383179199 | 0.502 | 0.386 |
| RASA11   | 6.16E-118 | 0.386786947 | 0.535 | 0.422 |
| STK391   | 6.86E-117 | 0.3340893   | 0.325 | 0.207 |
| HIST1H3D | 4.53E-116 | 0.415528959 | 0.265 | 0.162 |
| EID1     | 4.97E-116 | 0.335457149 | 0.599 | 0.505 |
| NEU1     | 8.23E-116 | 0.539605267 | 0.343 | 0.239 |
| LRRC8C1  | 1.48E-114 | 0.354885927 | 0.461 | 0.338 |
| TRANK1   | 1.75E-114 | 0.365085678 | 0.301 | 0.193 |
| ITM2C    | 1.87E-114 | 0.40410823  | 0.251 | 0.15  |
| LAX1     | 1.47E-113 | 0.329775968 | 0.297 | 0.184 |
| IFI27L2  | 3.98E-113 | 0.38797446  | 0.375 | 0.276 |
| SLC9A3R1 | 1.39E-112 | 0.326484332 | 0.279 | 0.176 |
| GGA2     | 3.65E-112 | 0.374342143 | 0.465 | 0.35  |
| PRMT2    | 1.80E-111 | 0.349364818 | 0.416 | 0.307 |

|            |           |             |       |       |
|------------|-----------|-------------|-------|-------|
| SRI        | 2.12E-111 | 0.332916404 | 0.413 | 0.309 |
| HIST1H1E   | 5.58E-111 | 0.386433665 | 0.313 | 0.204 |
| CHORDC1    | 8.43E-110 | 0.419035313 | 0.581 | 0.479 |
| AC008569.1 | 6.89E-109 | 0.363702559 | 0.261 | 0.159 |
| EIF4A2     | 7.74E-109 | 0.276710745 | 0.747 | 0.667 |
| FBXO321    | 8.89E-109 | 0.325625528 | 0.272 | 0.165 |
| VAMP2      | 3.66E-108 | 0.335511475 | 0.453 | 0.347 |
| MAP4       | 3.71E-108 | 0.386305373 | 0.413 | 0.308 |
| NDUFS51    | 1.26E-107 | 0.273232462 | 0.66  | 0.562 |
| KLF121     | 2.94E-106 | 0.347077892 | 0.605 | 0.477 |
| CDC14A1    | 1.12E-105 | 0.295875569 | 0.517 | 0.384 |
| CREBZF     | 1.27E-105 | 0.35963862  | 0.271 | 0.172 |
| AHSA1      | 1.49E-105 | 0.412784851 | 0.481 | 0.383 |
| ENSA       | 2.94E-105 | 0.273746645 | 0.65  | 0.564 |
| ITPRIP     | 3.02E-105 | 0.378802394 | 0.271 | 0.175 |
| SEMA4D     | 6.06E-105 | 0.3271579   | 0.504 | 0.402 |
| PRKCA1     | 1.12E-104 | 0.270419318 | 0.49  | 0.357 |
| MYLIP      | 1.36E-104 | 0.39778927  | 0.533 | 0.428 |
| RGCC1      | 7.50E-104 | 0.475222426 | 0.564 | 0.452 |
| TMEM181    | 9.19E-104 | 0.37812064  | 0.319 | 0.217 |
| PRDM1      | 2.33E-103 | 0.342921787 | 0.459 | 0.34  |
| CD38       | 2.37E-103 | 0.534885128 | 0.253 | 0.161 |
| DUSP10     | 1.86E-102 | 0.38316491  | 0.372 | 0.267 |
| UBE2E3     | 1.96E-102 | 0.40260644  | 0.356 | 0.256 |
| MIER1      | 2.61E-102 | 0.313659591 | 0.565 | 0.469 |
| DEK        | 1.02E-101 | 0.276463006 | 0.637 | 0.534 |
| ANKRD13D   | 2.36E-100 | 0.352165496 | 0.297 | 0.198 |
| LMNB1      | 4.77E-100 | 0.360766416 | 0.25  | 0.158 |
| TRAPPC10   | 9.74E-100 | 0.340303916 | 0.521 | 0.426 |
| FAM102B    | 1.67E-99  | 0.403193909 | 0.359 | 0.251 |
| SPATS2L    | 5.58E-99  | 0.386566637 | 0.427 | 0.313 |
| RSRP11     | 6.07E-99  | 0.30995403  | 0.671 | 0.59  |
| TLN1       | 2.14E-98  | 0.315167405 | 0.554 | 0.459 |
| BHLHE40    | 1.28E-97  | 0.396333944 | 0.341 | 0.237 |
| RPAP2      | 5.74E-97  | 0.323314708 | 0.317 | 0.215 |
| SEM1       | 8.45E-97  | 0.253150885 | 0.535 | 0.447 |
| SURF4      | 1.66E-96  | 0.383971739 | 0.41  | 0.319 |
| RBCK1      | 3.41E-96  | 0.328076384 | 0.322 | 0.227 |
| ZCCHC2     | 4.36E-96  | 0.373790204 | 0.354 | 0.253 |
| IL21R      | 8.47E-96  | 0.305897164 | 0.351 | 0.24  |
| SERTAD1    | 1.26E-95  | 0.449065207 | 0.406 | 0.312 |
| SNRPB      | 1.85E-95  | 0.273248003 | 0.637 | 0.56  |
| SHISA5     | 1.95E-95  | 0.322406708 | 0.301 | 0.207 |

|             |          |             |       |       |
|-------------|----------|-------------|-------|-------|
| DHRS7       | 8.50E-95 | 0.353798018 | 0.421 | 0.329 |
| NCOR1       | 1.01E-94 | 0.295962824 | 0.622 | 0.537 |
| PARK7       | 4.69E-94 | 0.252360244 | 0.643 | 0.556 |
| CDC42EP3    | 1.94E-93 | 0.385187856 | 0.394 | 0.291 |
| NFIL3       | 5.80E-93 | 0.323297821 | 0.299 | 0.204 |
| LAT1        | 2.60E-92 | 0.252992992 | 0.284 | 0.181 |
| SSBP4       | 7.30E-91 | 0.310903535 | 0.298 | 0.206 |
| TMX4        | 1.59E-90 | 0.318710529 | 0.345 | 0.246 |
| VAV3        | 1.77E-90 | 0.360552026 | 0.53  | 0.422 |
| XRN1        | 6.08E-90 | 0.319751592 | 0.568 | 0.483 |
| RUNX21      | 6.21E-90 | 0.354747127 | 0.374 | 0.272 |
| SEPTIN1     | 7.70E-90 | 0.252373888 | 0.326 | 0.224 |
| HIBCH       | 9.52E-90 | 0.414604518 | 0.394 | 0.291 |
| PRDX6       | 2.92E-89 | 0.274080017 | 0.502 | 0.414 |
| TAF7        | 5.04E-89 | 0.306398259 | 0.535 | 0.445 |
| PTP4A2      | 9.34E-89 | 0.293363606 | 0.574 | 0.491 |
| NFATC3      | 1.52E-88 | 0.353526463 | 0.369 | 0.269 |
| PREP        | 2.76E-88 | 0.34140279  | 0.271 | 0.181 |
| CMC2        | 1.85E-87 | 0.343103704 | 0.374 | 0.28  |
| CDK6        | 1.93E-87 | 0.41570046  | 0.405 | 0.306 |
| CEP85L1     | 2.69E-87 | 0.315949737 | 0.473 | 0.369 |
| DDX58       | 8.82E-87 | 0.374646598 | 0.279 | 0.188 |
| MAPK1       | 9.08E-86 | 0.320337511 | 0.451 | 0.358 |
| AC044849.11 | 5.34E-85 | 0.324670559 | 0.383 | 0.276 |
| NCOA71      | 6.74E-85 | 0.30219895  | 0.377 | 0.277 |
| CD2BP2      | 6.89E-85 | 0.345576216 | 0.292 | 0.208 |
| ITGB2       | 7.40E-85 | 0.307542958 | 0.455 | 0.351 |
| NUDC        | 1.63E-84 | 0.344641519 | 0.507 | 0.422 |
| RGS2        | 2.15E-84 | 0.378860901 | 0.636 | 0.529 |
| ZNRF11      | 3.96E-84 | 0.328218053 | 0.294 | 0.198 |
| TRPC4AP     | 9.96E-84 | 0.359513347 | 0.45  | 0.362 |
| SGMS1       | 1.03E-83 | 0.315753612 | 0.496 | 0.401 |
| SPTAN11     | 3.41E-83 | 0.283832514 | 0.547 | 0.458 |
| REEP5       | 4.87E-83 | 0.288244427 | 0.509 | 0.43  |
| HERC5       | 5.90E-83 | 0.349328556 | 0.292 | 0.199 |
| HMGN4       | 1.89E-82 | 0.306718483 | 0.369 | 0.28  |
| CD27        | 3.50E-82 | 0.427582828 | 0.375 | 0.281 |
| SYNRG       | 4.14E-82 | 0.313740619 | 0.449 | 0.356 |
| WDR83OS     | 4.80E-82 | 0.278517012 | 0.513 | 0.436 |
| ZNF83       | 5.51E-82 | 0.334754182 | 0.28  | 0.191 |
| RGS11       | 2.30E-81 | 0.377406542 | 0.706 | 0.61  |
| C21orf91    | 3.02E-81 | 0.302423065 | 0.254 | 0.167 |
| SF3B5       | 8.65E-81 | 0.258668434 | 0.535 | 0.456 |

|           |          |             |       |       |
|-----------|----------|-------------|-------|-------|
| IFI35     | 1.34E-80 | 0.378309257 | 0.285 | 0.204 |
| CASP3     | 1.52E-80 | 0.334108539 | 0.318 | 0.232 |
| TAF15     | 1.78E-80 | 0.267838971 | 0.547 | 0.462 |
| NAB1      | 4.06E-80 | 0.36697053  | 0.318 | 0.229 |
| TAX1BP1   | 5.74E-80 | 0.265619917 | 0.645 | 0.581 |
| USP25     | 2.77E-79 | 0.368640206 | 0.408 | 0.319 |
| FAM177A11 | 3.27E-79 | 0.354631942 | 0.586 | 0.508 |
| CITED21   | 3.58E-79 | 0.334872109 | 0.389 | 0.297 |
| UBR2      | 4.50E-79 | 0.294591382 | 0.509 | 0.422 |
| ARF6      | 1.20E-78 | 0.295148732 | 0.492 | 0.409 |
| POLR2A    | 1.59E-78 | 0.3513174   | 0.549 | 0.475 |
| BLOC1S1   | 2.11E-78 | 0.291030063 | 0.469 | 0.384 |
| FGD31     | 1.02E-77 | 0.2586423   | 0.348 | 0.25  |
| PSME4     | 1.70E-77 | 0.337890328 | 0.516 | 0.432 |
| CHIC21    | 3.39E-77 | 0.276804388 | 0.483 | 0.393 |
| TSC22D1   | 8.37E-77 | 0.362578487 | 0.254 | 0.172 |
| HP1BP3    | 1.72E-76 | 0.265694596 | 0.553 | 0.477 |
| TBL1XR1   | 2.92E-76 | 0.282556258 | 0.534 | 0.453 |
| UBE2L6    | 3.95E-76 | 0.330514838 | 0.343 | 0.262 |
| RFC1      | 6.54E-76 | 0.287867586 | 0.384 | 0.295 |
| PMF1      | 1.09E-75 | 0.256854358 | 0.419 | 0.332 |
| KIF2A1    | 2.25E-75 | 0.266434005 | 0.462 | 0.365 |
| YWHAQ     | 2.45E-75 | 0.278162796 | 0.578 | 0.502 |
| TAP1      | 4.44E-75 | 0.292954371 | 0.337 | 0.254 |
| RBL21     | 6.74E-75 | 0.287291421 | 0.323 | 0.233 |
| PGAM1     | 2.01E-74 | 0.295160598 | 0.434 | 0.354 |
| BZW1      | 2.21E-74 | 0.270831901 | 0.596 | 0.518 |
| DIAPH1    | 8.99E-74 | 0.280165685 | 0.502 | 0.416 |
| RSBN1L    | 1.43E-73 | 0.27478117  | 0.465 | 0.379 |
| GLS       | 1.67E-73 | 0.253607681 | 0.775 | 0.694 |
| NUCB2     | 2.26E-73 | 0.310397762 | 0.275 | 0.194 |
| H2AFX     | 2.51E-73 | 0.366882511 | 0.305 | 0.222 |
| CDC42SE1  | 3.12E-73 | 0.30849502  | 0.434 | 0.353 |
| CDK2AP2   | 3.90E-73 | 0.317461131 | 0.303 | 0.224 |
| GPATCH8   | 1.17E-72 | 0.27553457  | 0.575 | 0.497 |
| LSM2      | 1.18E-72 | 0.298343457 | 0.307 | 0.228 |
| SLC38A2   | 4.44E-72 | 0.295550973 | 0.62  | 0.552 |
| PLP2      | 4.70E-72 | 0.297421316 | 0.46  | 0.379 |
| SLC4A7    | 7.44E-72 | 0.319880511 | 0.5   | 0.413 |
| PSMB10    | 8.25E-72 | 0.310648583 | 0.421 | 0.346 |
| TENT4B    | 1.02E-71 | 0.371530283 | 0.318 | 0.236 |
| PLEKHA2   | 2.28E-71 | 0.290314167 | 0.528 | 0.439 |
| S1PR4     | 4.76E-71 | 0.27923968  | 0.28  | 0.194 |

|             |          |             |       |       |
|-------------|----------|-------------|-------|-------|
| ABHD17B     | 5.09E-70 | 0.343841644 | 0.359 | 0.275 |
| CORO7       | 5.77E-70 | 0.322613987 | 0.38  | 0.295 |
| FLNA        | 3.97E-69 | 0.279688674 | 0.375 | 0.289 |
| HELB        | 1.10E-68 | 0.259408569 | 0.257 | 0.175 |
| RC3H1       | 1.19E-68 | 0.28270678  | 0.563 | 0.491 |
| LINC00623   | 1.40E-68 | 0.253764043 | 0.301 | 0.218 |
| PARP9       | 2.03E-68 | 0.32235778  | 0.266 | 0.189 |
| ABL1        | 2.44E-68 | 0.364169487 | 0.295 | 0.215 |
| SRSF2       | 2.66E-68 | 0.342068335 | 0.615 | 0.564 |
| TFDP2       | 5.85E-68 | 0.357384274 | 0.342 | 0.256 |
| CACYBP1     | 1.15E-67 | 0.369921135 | 0.589 | 0.512 |
| POLR2K      | 2.89E-67 | 0.261208149 | 0.408 | 0.33  |
| SMURF2      | 3.06E-67 | 0.324424284 | 0.404 | 0.32  |
| R3HDM1      | 3.45E-67 | 0.30167039  | 0.32  | 0.238 |
| MX1         | 3.62E-67 | 0.408212201 | 0.386 | 0.309 |
| STAT5A      | 4.25E-67 | 0.337256423 | 0.271 | 0.196 |
| MXD4        | 9.51E-67 | 0.324982104 | 0.385 | 0.312 |
| IGF2R       | 3.97E-66 | 0.258940434 | 0.424 | 0.339 |
| KDM5A       | 1.28E-65 | 0.26792373  | 0.513 | 0.439 |
| PSMA5       | 1.39E-65 | 0.251383726 | 0.449 | 0.374 |
| TRAF5       | 1.11E-64 | 0.28501717  | 0.342 | 0.257 |
| NUB1        | 1.63E-64 | 0.269555178 | 0.337 | 0.258 |
| HIST2H2AC   | 1.44E-63 | 0.316600126 | 0.273 | 0.198 |
| AC068587.41 | 1.59E-63 | 0.413384718 | 0.276 | 0.199 |
| TRIM22      | 1.59E-63 | 0.321935577 | 0.434 | 0.355 |
| CD84        | 1.70E-63 | 0.280610969 | 0.298 | 0.218 |
| EPS15       | 2.54E-63 | 0.250239204 | 0.52  | 0.441 |
| HMOX2       | 3.92E-63 | 0.263330103 | 0.31  | 0.232 |
| FRYL        | 1.16E-62 | 0.262907789 | 0.568 | 0.491 |
| BUD31       | 1.93E-62 | 0.251166031 | 0.456 | 0.389 |
| TIAM2       | 2.16E-62 | 0.39035866  | 0.252 | 0.179 |
| KIAA0319L   | 1.25E-61 | 0.302467087 | 0.287 | 0.209 |
| TBCC1       | 1.50E-61 | 0.263577065 | 0.294 | 0.214 |
| ADSS        | 1.56E-61 | 0.275657607 | 0.436 | 0.361 |
| SELENOI     | 2.50E-61 | 0.27153297  | 0.269 | 0.193 |
| RFX7        | 4.38E-61 | 0.311223474 | 0.359 | 0.274 |
| NMRK1       | 6.21E-61 | 0.312100438 | 0.26  | 0.186 |
| ZMYND11     | 1.23E-60 | 0.274645251 | 0.301 | 0.223 |
| DYNLL1      | 1.58E-60 | 0.272306777 | 0.686 | 0.624 |
| STIP1       | 3.25E-60 | 0.290992033 | 0.429 | 0.354 |
| CHMP4A      | 5.61E-60 | 0.268004539 | 0.444 | 0.377 |
| CAB39       | 1.44E-59 | 0.305564098 | 0.459 | 0.388 |
| CCT4        | 1.11E-58 | 0.268754165 | 0.557 | 0.497 |



|            |          |             |       |       |
|------------|----------|-------------|-------|-------|
| TOB11      | 2.06E-58 | 0.284481533 | 0.37  | 0.293 |
| ZDHHC20    | 2.03E-57 | 0.29561716  | 0.415 | 0.338 |
| LNPEP      | 6.13E-57 | 0.254293572 | 0.388 | 0.312 |
| DR1        | 8.76E-57 | 0.25417744  | 0.278 | 0.207 |
| PRPF4B     | 1.04E-56 | 0.252971164 | 0.55  | 0.487 |
| ZNF217     | 3.81E-56 | 0.250817075 | 0.292 | 0.219 |
| UBE2A      | 1.84E-55 | 0.285846799 | 0.399 | 0.335 |
| CSNK1G3    | 7.34E-55 | 0.261193233 | 0.394 | 0.315 |
| ITGB1      | 1.22E-54 | 0.270072625 | 0.525 | 0.452 |
| IRF9       | 3.54E-54 | 0.290169414 | 0.366 | 0.296 |
| SUCLG2     | 5.69E-54 | 0.251229816 | 0.471 | 0.397 |
| NUTM2B-AS1 | 8.08E-54 | 0.311173804 | 0.395 | 0.325 |
| SEPTIN11   | 1.19E-53 | 0.286026799 | 0.281 | 0.212 |
| OAT        | 5.40E-53 | 0.273286494 | 0.322 | 0.253 |
| ANP32E     | 1.24E-52 | 0.252137899 | 0.371 | 0.302 |
| USP33      | 1.45E-52 | 0.268214457 | 0.348 | 0.279 |
| ADAR       | 1.52E-52 | 0.253235857 | 0.45  | 0.388 |
| TTN        | 2.49E-52 | 0.255027992 | 0.259 | 0.185 |
| MACO1      | 4.15E-52 | 0.33110992  | 0.339 | 0.273 |
| USP11      | 1.72E-51 | 0.26762703  | 0.277 | 0.211 |
| STIM1      | 2.05E-51 | 0.27026729  | 0.448 | 0.375 |
| GNPTAB     | 9.15E-51 | 0.337983062 | 0.383 | 0.321 |
| MBD5       | 7.67E-50 | 0.273934144 | 0.461 | 0.387 |
| PPP6R2     | 1.20E-49 | 0.25545305  | 0.363 | 0.295 |
| ETNK1      | 2.07E-48 | 0.271673213 | 0.408 | 0.347 |
| RNF166     | 5.92E-48 | 0.256921551 | 0.259 | 0.197 |
| RASSF1     | 1.51E-47 | 0.264667833 | 0.252 | 0.19  |
| PPP3CC     | 3.51E-46 | 0.26262338  | 0.439 | 0.373 |
| MORF4L2    | 3.61E-45 | 0.270957877 | 0.561 | 0.517 |
| INTS6L     | 2.10E-43 | 0.266713271 | 0.283 | 0.219 |
| RASA31     | 4.21E-42 | 0.325107794 | 0.391 | 0.333 |
| LRIF1      | 6.36E-42 | 0.286073351 | 0.287 | 0.226 |
| HIST1H1D   | 1.66E-40 | 0.273648288 | 0.27  | 0.208 |
| BAG3       | 1.82E-40 | 0.301304721 | 0.316 | 0.251 |
| CBX4       | 9.97E-40 | 0.267608717 | 0.272 | 0.217 |
| TPP2       | 1.02E-39 | 0.253683696 | 0.336 | 0.279 |
| ABHD3      | 4.18E-39 | 0.300167519 | 0.383 | 0.321 |
| TRIM26     | 1.05E-38 | 0.266748102 | 0.291 | 0.235 |
| OSBPL3     | 9.64E-38 | 0.262955173 | 0.396 | 0.337 |
| ENTPD1-AS1 | 1.42E-35 | 0.350459824 | 0.275 | 0.223 |
| INPP5F     | 3.94E-32 | 0.350123085 | 0.25  | 0.199 |
| TGFB1      | 1.01E-30 | 0.319183964 | 0.597 | 0.575 |
| RHOB       | 2.68E-30 | 0.342588463 | 0.281 | 0.232 |

|            |          |             |       |       |
|------------|----------|-------------|-------|-------|
| ZFAND2A    | 6.72E-28 | 0.288304006 | 0.318 | 0.271 |
| GOLGA4     | 4.12E-25 | 0.255165364 | 0.57  | 0.544 |
| ENTPD1     | 7.90E-12 | 0.360217976 | 0.258 | 0.242 |
| AFF3       | 0        | 3.222494889 | 0.95  | 0.16  |
| BANK1      | 0        | 3.031361022 | 0.952 | 0.101 |
| EBF1       | 0        | 2.779622748 | 0.863 | 0.094 |
| CD79A      | 0        | 2.761053132 | 0.921 | 0.145 |
| ARHGAP24   | 0        | 2.649875051 | 0.861 | 0.117 |
| BACH2      | 0        | 2.490755015 | 0.927 | 0.441 |
| MS4A1      | 0        | 2.489397477 | 0.905 | 0.086 |
| PLEKHG1    | 0        | 2.484654997 | 0.84  | 0.166 |
| GNG7       | 0        | 2.425424648 | 0.915 | 0.201 |
| LY9        | 0        | 2.406485848 | 0.779 | 0.164 |
| IGHD       | 0        | 2.336467206 | 0.603 | 0.017 |
| ADAM28     | 0        | 2.323867795 | 0.825 | 0.166 |
| TCF4       | 0        | 2.303589277 | 0.778 | 0.19  |
| FCRL1      | 0        | 2.203324485 | 0.666 | 0.045 |
| 1-Mar      | 0        | 2.18258033  | 0.684 | 0.134 |
| LYN        | 0        | 2.173871862 | 0.933 | 0.284 |
| CCSER1     | 0        | 2.145077767 | 0.618 | 0.106 |
| RALGPS2    | 0        | 2.123885537 | 0.788 | 0.152 |
| TNFRSF13C  | 0        | 2.109166999 | 0.809 | 0.093 |
| MEF2C      | 0        | 2.094684622 | 0.844 | 0.192 |
| KHDRBS2    | 0        | 2.048834432 | 0.551 | 0.038 |
| MGAT5      | 0        | 2.042193243 | 0.913 | 0.426 |
| LARGE1     | 0        | 2.039946992 | 0.588 | 0.093 |
| BCL11A     | 0        | 2.039527688 | 0.684 | 0.095 |
| PRKCE      | 0        | 2.029691304 | 0.854 | 0.335 |
| RUBCNL     | 0        | 2.000620057 | 0.661 | 0.078 |
| ST6GALNAC3 | 0        | 1.960614019 | 0.612 | 0.147 |
| CD83       | 0        | 1.925741595 | 0.932 | 0.363 |
| AC120193.1 | 0        | 1.915233284 | 0.677 | 0.12  |
| COL19A1    | 0        | 1.914540204 | 0.515 | 0.024 |
| YBX3       | 0        | 1.906381297 | 0.591 | 0.224 |
| C12orf42   | 0        | 1.860401219 | 0.59  | 0.067 |
| TMEM156    | 0        | 1.833398744 | 0.667 | 0.24  |
| ST6GAL1    | 0        | 1.833305954 | 0.824 | 0.294 |
| CHPT1      | 0        | 1.813558418 | 0.702 | 0.167 |
| HLA-DRA    | 0        | 1.796352123 | 0.986 | 0.472 |
| JADE3      | 0        | 1.791649732 | 0.557 | 0.054 |
| TLE1       | 0        | 1.791456441 | 0.604 | 0.114 |
| CD37       | 0        | 1.791125181 | 0.955 | 0.619 |
| LINC00926  | 0        | 1.738421243 | 0.596 | 0.049 |

|             |   |             |       |       |
|-------------|---|-------------|-------|-------|
| PAX5        | 0 | 1.723316224 | 0.621 | 0.05  |
| VPREB3      | 0 | 1.719547239 | 0.584 | 0.051 |
| TCL1A       | 0 | 1.697420788 | 0.438 | 0.021 |
| INPP5A      | 0 | 1.687622726 | 0.669 | 0.183 |
| ACSM3       | 0 | 1.682064868 | 0.29  | 0.029 |
| KLHL5       | 0 | 1.651162235 | 0.635 | 0.257 |
| SWAP70      | 0 | 1.649725543 | 0.728 | 0.167 |
| SMAD3       | 0 | 1.643156205 | 0.713 | 0.273 |
| CD74        | 0 | 1.63197112  | 0.994 | 0.68  |
| HLA-DQA1    | 0 | 1.59706632  | 0.935 | 0.334 |
| UBE2E2      | 0 | 1.591174885 | 0.669 | 0.194 |
| BLK         | 0 | 1.582616511 | 0.59  | 0.062 |
| CARMIL1     | 0 | 1.571653809 | 0.543 | 0.124 |
| SNX2        | 0 | 1.564050382 | 0.814 | 0.353 |
| SSH2        | 0 | 1.56320983  | 0.919 | 0.625 |
| ZBTB16      | 0 | 1.536106837 | 0.595 | 0.211 |
| SIPA1L3     | 0 | 1.535748453 | 0.672 | 0.221 |
| HLA-DQB1    | 0 | 1.527678764 | 0.93  | 0.351 |
| HLA-DPB1    | 0 | 1.516954929 | 0.968 | 0.541 |
| HLA-DRB5    | 0 | 1.508916306 | 0.706 | 0.171 |
| WDFY4       | 0 | 1.47647668  | 0.608 | 0.114 |
| RERE        | 0 | 1.473353289 | 0.842 | 0.457 |
| VPS37B      | 0 | 1.467546155 | 0.742 | 0.411 |
| CDK14       | 0 | 1.454156636 | 0.758 | 0.254 |
| OSBPL10     | 0 | 1.444180358 | 0.489 | 0.081 |
| IRF8        | 0 | 1.43071955  | 0.676 | 0.167 |
| HLA-DQA2    | 0 | 1.409437559 | 0.726 | 0.215 |
| ANKRD44     | 0 | 1.396408233 | 0.944 | 0.699 |
| FCHSD2      | 0 | 1.392883258 | 0.781 | 0.372 |
| AP001011.11 | 0 | 1.390073839 | 0.785 | 0.445 |
| AUTS21      | 0 | 1.383623032 | 0.657 | 0.243 |
| THRB        | 0 | 1.382897566 | 0.292 | 0.026 |
| PLCG2       | 0 | 1.381905322 | 0.755 | 0.237 |
| GRASP       | 0 | 1.379959663 | 0.617 | 0.181 |
| SETBP1      | 0 | 1.376721771 | 0.583 | 0.143 |
| SFMBT11     | 0 | 1.373708185 | 0.646 | 0.272 |
| LINC02397   | 0 | 1.371436104 | 0.451 | 0.037 |
| NIBAN3      | 0 | 1.351104964 | 0.47  | 0.032 |
| SLC49A4     | 0 | 1.348198172 | 0.505 | 0.18  |
| CD22        | 0 | 1.346348849 | 0.496 | 0.064 |
| INPP5D      | 0 | 1.332017387 | 0.825 | 0.448 |
| HDAC9       | 0 | 1.31992262  | 0.496 | 0.153 |
| SNX29       | 0 | 1.314006277 | 0.69  | 0.315 |

|            |   |             |       |       |
|------------|---|-------------|-------|-------|
| TTC3       | 0 | 1.312456782 | 0.715 | 0.438 |
| LAPTM5     | 0 | 1.311995609 | 0.958 | 0.667 |
| KCNQ5      | 0 | 1.300312217 | 0.34  | 0.075 |
| DNMBP      | 0 | 1.280745067 | 0.411 | 0.101 |
| SIPA1L1    | 0 | 1.275812798 | 0.954 | 0.638 |
| COBLL1     | 0 | 1.260458586 | 0.516 | 0.106 |
| CD55       | 0 | 1.259360144 | 0.914 | 0.524 |
| RCSD1      | 0 | 1.257362565 | 0.686 | 0.32  |
| HVCN1      | 0 | 1.25703188  | 0.479 | 0.081 |
| SMCHD11    | 0 | 1.250963165 | 0.954 | 0.809 |
| ZCCHC7     | 0 | 1.250409016 | 0.754 | 0.455 |
| RAB30      | 0 | 1.222663734 | 0.608 | 0.197 |
| CD79B      | 0 | 1.219677129 | 0.537 | 0.152 |
| TRAK1      | 0 | 1.208532507 | 0.637 | 0.259 |
| EZR        | 0 | 1.208309204 | 0.962 | 0.785 |
| PDE7A      | 0 | 1.203101198 | 0.883 | 0.554 |
| RHOH       | 0 | 1.201859756 | 0.862 | 0.635 |
| FCER2      | 0 | 1.198656899 | 0.353 | 0.015 |
| SNED1      | 0 | 1.195121063 | 0.338 | 0.109 |
| RB1        | 0 | 1.19387724  | 0.751 | 0.427 |
| STAP1      | 0 | 1.191941434 | 0.439 | 0.067 |
| STRBP      | 0 | 1.190638481 | 0.625 | 0.226 |
| MICAL3     | 0 | 1.181524059 | 0.519 | 0.133 |
| MTSS1      | 0 | 1.176243178 | 0.53  | 0.192 |
| ORAI2      | 0 | 1.171365228 | 0.545 | 0.16  |
| SMIM14     | 0 | 1.165137947 | 0.523 | 0.15  |
| AP002075.1 | 0 | 1.162813072 | 0.4   | 0.026 |
| AC119396.1 | 0 | 1.162022787 | 0.401 | 0.076 |
| EIF2AK3    | 0 | 1.157453185 | 0.635 | 0.325 |
| GNB5       | 0 | 1.15652792  | 0.511 | 0.189 |
| CD72       | 0 | 1.155663093 | 0.47  | 0.116 |
| TMEM131L   | 0 | 1.153469382 | 0.673 | 0.347 |
| HLA-DMB    | 0 | 1.128506933 | 0.637 | 0.181 |
| SNX9       | 0 | 1.115285533 | 0.918 | 0.684 |
| HLA-DPA1   | 0 | 1.102040116 | 0.947 | 0.521 |
| TMEM123    | 0 | 1.101974805 | 0.725 | 0.479 |
| RBM38      | 0 | 1.100562453 | 0.661 | 0.293 |
| STEAP1B    | 0 | 1.097617247 | 0.486 | 0.23  |
| MAP4K4     | 0 | 1.097125174 | 0.863 | 0.502 |
| FAM49A     | 0 | 1.094540822 | 0.603 | 0.229 |
| PRDM2      | 0 | 1.093365906 | 0.875 | 0.613 |
| STAG3      | 0 | 1.089378191 | 0.337 | 0.06  |
| LY86       | 0 | 1.088892972 | 0.464 | 0.106 |

|            |   |             |       |       |
|------------|---|-------------|-------|-------|
| TUBB6      | 0 | 1.087984125 | 0.362 | 0.124 |
| LSM7       | 0 | 1.082646253 | 0.708 | 0.417 |
| ABHD15-AS1 | 0 | 1.081025997 | 0.485 | 0.151 |
| STX7       | 0 | 1.080049263 | 0.527 | 0.205 |
| TPD52      | 0 | 1.076932324 | 0.613 | 0.258 |
| DENND5B    | 0 | 1.076016809 | 0.384 | 0.086 |
| PARP15     | 0 | 1.073030831 | 0.576 | 0.222 |
| PHACTR1    | 0 | 1.072420219 | 0.504 | 0.153 |
| HLA-DMA    | 0 | 1.068569598 | 0.756 | 0.305 |
| UVRAG      | 0 | 1.067667961 | 0.712 | 0.372 |
| IFT57      | 0 | 1.067176261 | 0.521 | 0.177 |
| DMXL1      | 0 | 1.064194209 | 0.564 | 0.275 |
| DLEU2      | 0 | 1.063131281 | 0.701 | 0.472 |
| BORCS5     | 0 | 1.055011158 | 0.642 | 0.405 |
| ZNF331     | 0 | 1.054629066 | 0.783 | 0.585 |
| MEF2A      | 0 | 1.050794858 | 0.682 | 0.376 |
| IGHM       | 0 | 1.046647329 | 0.756 | 0.13  |
| CAMK2D     | 0 | 1.046360403 | 0.671 | 0.435 |
| TRIO       | 0 | 1.045727658 | 0.622 | 0.233 |
| NOTCH2     | 0 | 1.037915139 | 0.461 | 0.171 |
| ALG13      | 0 | 1.037421602 | 0.631 | 0.386 |
| PRKCB      | 0 | 1.033641598 | 0.847 | 0.554 |
| GAB1       | 0 | 1.032104794 | 0.329 | 0.105 |
| ZHX2       | 0 | 1.030426507 | 0.853 | 0.566 |
| HLA-DRB1   | 0 | 1.029239814 | 0.963 | 0.515 |
| WDFY2      | 0 | 1.026820072 | 0.527 | 0.268 |
| 8-Mar      | 0 | 1.026686703 | 0.488 | 0.18  |
| PTK2       | 0 | 1.026384709 | 0.415 | 0.098 |
| MANBA      | 0 | 1.025842853 | 0.626 | 0.298 |
| EIF1AY     | 0 | 1.024317193 | 0.474 | 0.167 |
| REV3L      | 0 | 1.02043548  | 0.717 | 0.453 |
| GRK5       | 0 | 1.018898814 | 0.608 | 0.338 |
| EEF1B2     | 0 | 1.018881437 | 0.95  | 0.826 |
| RUBCN      | 0 | 1.017784581 | 0.553 | 0.22  |
| PKIG       | 0 | 1.016082933 | 0.416 | 0.079 |
| SEL1L3     | 0 | 1.015544226 | 0.577 | 0.276 |
| FAM177B    | 0 | 1.011342054 | 0.342 | 0.058 |
| P2RX5      | 0 | 1.003224068 | 0.42  | 0.102 |
| PIKFYVE    | 0 | 1.000904936 | 0.511 | 0.223 |
| CD24       | 0 | 1.000270783 | 0.384 | 0.053 |
| WASHC4     | 0 | 0.999001189 | 0.606 | 0.283 |
| FCMR       | 0 | 0.989602501 | 0.631 | 0.248 |
| AC079921.1 | 0 | 0.986587222 | 0.339 | 0.069 |

|            |   |             |       |       |
|------------|---|-------------|-------|-------|
| NIN        | 0 | 0.973709952 | 0.596 | 0.329 |
| GPR18      | 0 | 0.971933235 | 0.395 | 0.112 |
| RFTN1      | 0 | 0.966163073 | 0.764 | 0.547 |
| RASGRP2    | 0 | 0.966119079 | 0.489 | 0.145 |
| GNA12      | 0 | 0.965975213 | 0.555 | 0.243 |
| ANGPTL1    | 0 | 0.963575625 | 0.325 | 0.04  |
| USP6NL     | 0 | 0.960325038 | 0.382 | 0.097 |
| CMSS11     | 0 | 0.956911763 | 0.661 | 0.427 |
| TBC1D5     | 0 | 0.954936717 | 0.789 | 0.521 |
| PARVB      | 0 | 0.954074172 | 0.512 | 0.209 |
| USP8       | 0 | 0.949168815 | 0.713 | 0.435 |
| PLEKHA21   | 0 | 0.948847762 | 0.686 | 0.42  |
| ARHGEF18   | 0 | 0.947969357 | 0.525 | 0.213 |
| POU2F2     | 0 | 0.945099946 | 0.542 | 0.226 |
| TMEM131    | 0 | 0.943290735 | 0.677 | 0.386 |
| STIM2      | 0 | 0.942830805 | 0.688 | 0.407 |
| FAM210A    | 0 | 0.941610487 | 0.422 | 0.177 |
| DGKD       | 0 | 0.939662121 | 0.525 | 0.215 |
| HERPUD1    | 0 | 0.935855912 | 0.856 | 0.69  |
| FAM30A     | 0 | 0.935560719 | 0.3   | 0.036 |
| SH2B3      | 0 | 0.931255154 | 0.487 | 0.185 |
| BTG11      | 0 | 0.921431624 | 0.982 | 0.909 |
| TMEM243    | 0 | 0.920535837 | 0.671 | 0.344 |
| CD19       | 0 | 0.920159164 | 0.35  | 0.035 |
| DENND4A    | 0 | 0.917558286 | 0.888 | 0.66  |
| SAV1       | 0 | 0.911227184 | 0.397 | 0.118 |
| AP1B1      | 0 | 0.908964196 | 0.499 | 0.205 |
| SPIB       | 0 | 0.904248059 | 0.319 | 0.044 |
| NCF1       | 0 | 0.901018157 | 0.489 | 0.171 |
| NCOA3      | 0 | 0.900220096 | 0.798 | 0.51  |
| AP003086.1 | 0 | 0.898254261 | 0.402 | 0.186 |
| KDM4B      | 0 | 0.887396916 | 0.591 | 0.3   |
| GSAP       | 0 | 0.883591562 | 0.399 | 0.13  |
| PDLIM1     | 0 | 0.882637395 | 0.421 | 0.078 |
| GRK3       | 0 | 0.881972938 | 0.427 | 0.154 |
| SNX8       | 0 | 0.879203259 | 0.492 | 0.173 |
| YPEL5      | 0 | 0.87527585  | 0.86  | 0.651 |
| BMP2K      | 0 | 0.873960891 | 0.44  | 0.186 |
| OTUD1      | 0 | 0.871390849 | 0.453 | 0.186 |
| ANKRD13A   | 0 | 0.870729943 | 0.507 | 0.205 |
| ARRDC2     | 0 | 0.867666147 | 0.459 | 0.174 |
| CD521      | 0 | 0.866398911 | 0.888 | 0.638 |
| NGLY1      | 0 | 0.862300398 | 0.541 | 0.298 |

|          |   |             |       |       |
|----------|---|-------------|-------|-------|
| KLF21    | 0 | 0.860152565 | 0.764 | 0.455 |
| NFKBID   | 0 | 0.856913335 | 0.423 | 0.196 |
| GGA21    | 0 | 0.855282042 | 0.639 | 0.33  |
| EHMT1    | 0 | 0.854471367 | 0.694 | 0.445 |
| RIC1     | 0 | 0.851758864 | 0.587 | 0.335 |
| SKIL     | 0 | 0.849556959 | 0.807 | 0.526 |
| RRAS2    | 0 | 0.849535776 | 0.448 | 0.159 |
| EEF1G    | 0 | 0.845237293 | 0.95  | 0.828 |
| SYK      | 0 | 0.842521408 | 0.434 | 0.153 |
| ADK      | 0 | 0.841850565 | 0.778 | 0.575 |
| BPTF     | 0 | 0.838204614 | 0.803 | 0.607 |
| DRAM2    | 0 | 0.837888987 | 0.471 | 0.19  |
| RASGEF1B | 0 | 0.837694115 | 0.619 | 0.338 |
| E2F5     | 0 | 0.835589288 | 0.296 | 0.056 |
| ITPR1    | 0 | 0.835504059 | 0.719 | 0.448 |
| IL16     | 0 | 0.832878922 | 0.46  | 0.185 |
| ATF7IP2  | 0 | 0.829000622 | 0.547 | 0.278 |
| RHEX     | 0 | 0.827938338 | 0.297 | 0.055 |
| SC5D1    | 0 | 0.827713554 | 0.484 | 0.225 |
| DDX21    | 0 | 0.826256847 | 0.731 | 0.516 |
| RLF      | 0 | 0.817054836 | 0.683 | 0.482 |
| UST      | 0 | 0.815459057 | 0.573 | 0.255 |
| C16orf74 | 0 | 0.808797647 | 0.296 | 0.039 |
| NR4A2    | 0 | 0.808001372 | 0.737 | 0.485 |
| ANKRD11  | 0 | 0.804091224 | 0.885 | 0.72  |
| HIP1R    | 0 | 0.803535048 | 0.373 | 0.096 |
| SP100    | 0 | 0.80202874  | 0.891 | 0.688 |
| ZNF10    | 0 | 0.79916676  | 0.55  | 0.292 |
| SIDT1    | 0 | 0.798584642 | 0.479 | 0.229 |
| CLEC17A  | 0 | 0.796320814 | 0.255 | 0.021 |
| PAWR     | 0 | 0.794851621 | 0.306 | 0.044 |
| PRDM4    | 0 | 0.790312736 | 0.381 | 0.125 |
| SESTD1   | 0 | 0.789591884 | 0.425 | 0.157 |
| FARP2    | 0 | 0.784901984 | 0.415 | 0.178 |
| CNR2     | 0 | 0.781040864 | 0.268 | 0.031 |
| SKAP2    | 0 | 0.780470959 | 0.533 | 0.258 |
| CXCR5    | 0 | 0.777904764 | 0.311 | 0.053 |
| TAF1D    | 0 | 0.777071344 | 0.778 | 0.557 |
| NOP531   | 0 | 0.775207753 | 0.889 | 0.681 |
| HLA-DOB  | 0 | 0.774580881 | 0.296 | 0.04  |
| ZNF318   | 0 | 0.774462514 | 0.297 | 0.052 |
| ATP2A3   | 0 | 0.774420422 | 0.47  | 0.194 |
| SLC44A2  | 0 | 0.773412458 | 0.452 | 0.167 |

|            |   |             |       |       |
|------------|---|-------------|-------|-------|
| JAZF1      | 0 | 0.771607825 | 0.728 | 0.46  |
| SP1401     | 0 | 0.767256974 | 0.686 | 0.438 |
| SESN31     | 0 | 0.766178475 | 0.677 | 0.333 |
| PPFIBP2    | 0 | 0.765635639 | 0.261 | 0.073 |
| FAM117B    | 0 | 0.764144691 | 0.364 | 0.148 |
| SMAP2      | 0 | 0.761326412 | 0.965 | 0.832 |
| PIGB       | 0 | 0.757906354 | 0.379 | 0.138 |
| REL        | 0 | 0.755977605 | 0.905 | 0.63  |
| SPTLC2     | 0 | 0.755549139 | 0.416 | 0.203 |
| BLNK       | 0 | 0.753494725 | 0.303 | 0.071 |
| RRM2B      | 0 | 0.752999002 | 0.361 | 0.12  |
| RABEP2     | 0 | 0.751008367 | 0.35  | 0.102 |
| TUT4       | 0 | 0.750956172 | 0.688 | 0.433 |
| CCDC50     | 0 | 0.74747133  | 0.47  | 0.219 |
| IQSEC1     | 0 | 0.745267518 | 0.456 | 0.216 |
| TRAPPC8    | 0 | 0.743780868 | 0.448 | 0.217 |
| TRIM38     | 0 | 0.736138275 | 0.539 | 0.302 |
| BACH1      | 0 | 0.734664283 | 0.772 | 0.522 |
| PHF20      | 0 | 0.729541609 | 0.789 | 0.564 |
| LYL1       | 0 | 0.728001777 | 0.307 | 0.072 |
| NUP88      | 0 | 0.723720417 | 0.404 | 0.167 |
| AC027097.2 | 0 | 0.723230679 | 0.258 | 0.076 |
| ARID1B     | 0 | 0.722783494 | 0.861 | 0.67  |
| BTK        | 0 | 0.722227587 | 0.348 | 0.102 |
| CXCR41     | 0 | 0.71931588  | 0.955 | 0.797 |
| KMT2E      | 0 | 0.718231789 | 0.909 | 0.754 |
| TBC1D22A   | 0 | 0.717931747 | 0.721 | 0.503 |
| CAMK1D1    | 0 | 0.711097788 | 0.831 | 0.533 |
| USP34      | 0 | 0.708071982 | 0.826 | 0.644 |
| RNASE6     | 0 | 0.702327003 | 0.324 | 0.101 |
| BTLA       | 0 | 0.701522199 | 0.292 | 0.074 |
| SNX25      | 0 | 0.700322012 | 0.532 | 0.288 |
| P2RX1      | 0 | 0.699589037 | 0.256 | 0.063 |
| BRAF       | 0 | 0.69286982  | 0.806 | 0.604 |
| FAU        | 0 | 0.691204296 | 0.964 | 0.908 |
| CD40       | 0 | 0.686781195 | 0.346 | 0.109 |
| PAN3       | 0 | 0.685236989 | 0.715 | 0.512 |
| RACK1      | 0 | 0.680121212 | 0.957 | 0.883 |
| ITSN2      | 0 | 0.677944757 | 0.737 | 0.526 |
| RASGRP3    | 0 | 0.672761334 | 0.323 | 0.13  |
| SH3BP5     | 0 | 0.672313884 | 0.55  | 0.27  |
| YWHAZ      | 0 | 0.671629616 | 0.931 | 0.804 |
| BCAS4      | 0 | 0.669736742 | 0.372 | 0.121 |



|             |           |             |       |       |
|-------------|-----------|-------------|-------|-------|
| CEPT1       | 0         | 0.669635549 | 0.319 | 0.11  |
| MAPK8IP3    | 0         | 0.669425347 | 0.351 | 0.132 |
| CCR71       | 0         | 0.668756894 | 0.541 | 0.229 |
| MYCBP2      | 0         | 0.666572016 | 0.832 | 0.623 |
| UTRN1       | 0         | 0.662555484 | 0.849 | 0.684 |
| FGD2        | 0         | 0.658339365 | 0.284 | 0.081 |
| CDCA7L      | 0         | 0.654532437 | 0.25  | 0.044 |
| WDR27       | 0         | 0.652124467 | 0.267 | 0.081 |
| AC079793.11 | 0         | 0.649314988 | 0.665 | 0.401 |
| DAPP1       | 0         | 0.648562931 | 0.501 | 0.257 |
| CCND31      | 0         | 0.646265909 | 0.772 | 0.516 |
| KDM6B       | 0         | 0.645710492 | 0.537 | 0.286 |
| CHD7        | 0         | 0.632520218 | 0.437 | 0.185 |
| RNASET21    | 0         | 0.631930947 | 0.769 | 0.524 |
| ZBTB10      | 0         | 0.629870132 | 0.383 | 0.168 |
| SLC9A7      | 0         | 0.628435369 | 0.316 | 0.118 |
| CYBB        | 0         | 0.625679622 | 0.478 | 0.148 |
| MOB3B       | 0         | 0.617953585 | 0.316 | 0.123 |
| AP000787.11 | 0         | 0.614940844 | 0.501 | 0.222 |
| ARHGAP151   | 0         | 0.612448083 | 0.953 | 0.828 |
| POU2AF1     | 0         | 0.603458182 | 0.294 | 0.082 |
| SHISAL2A    | 0         | 0.599818289 | 0.267 | 0.076 |
| RASSF2      | 0         | 0.592030235 | 0.362 | 0.158 |
| PLAC8       | 0         | 0.588008323 | 0.419 | 0.167 |
| H3F3A       | 0         | 0.582941287 | 0.963 | 0.881 |
| TSPAN3      | 0         | 0.582812664 | 0.307 | 0.112 |
| TSPAN33     | 0         | 0.580247406 | 0.261 | 0.087 |
| ZFAS1       | 0         | 0.577113383 | 0.896 | 0.732 |
| EEF1A11     | 0         | 0.567612705 | 0.985 | 0.954 |
| EEF2        | 0         | 0.537892939 | 0.876 | 0.722 |
| GAS51       | 0         | 0.524826923 | 0.846 | 0.661 |
| PFDN5       | 0         | 0.513013867 | 0.923 | 0.823 |
| NACA        | 0         | 0.503411755 | 0.953 | 0.886 |
| UBA52       | 0         | 0.492944555 | 0.955 | 0.891 |
| PDE4B       | 0         | 0.4305985   | 0.834 | 0.612 |
| PXK         | 5.30E-306 | 0.632077092 | 0.379 | 0.176 |
| RNF144B     | 5.90E-306 | 0.648600835 | 0.353 | 0.148 |
| FOXP11      | 1.04E-304 | 0.558815351 | 0.88  | 0.721 |
| OSER1       | 2.51E-303 | 0.645909737 | 0.537 | 0.32  |
| XYLT1       | 3.37E-303 | 0.889655885 | 0.597 | 0.384 |
| RABEP1      | 1.15E-302 | 0.674796198 | 0.576 | 0.356 |
| CARD111     | 1.55E-301 | 0.748417502 | 0.593 | 0.357 |
| KDM4C       | 4.40E-301 | 0.663274603 | 0.695 | 0.491 |

|          |           |             |       |       |
|----------|-----------|-------------|-------|-------|
| GNA13    | 6.51E-301 | 0.670986922 | 0.642 | 0.422 |
| TAPT1    | 2.46E-300 | 0.701317874 | 0.361 | 0.166 |
| SF11     | 7.38E-299 | 0.52360804  | 0.779 | 0.571 |
| LAT2     | 1.88E-298 | 0.584040481 | 0.343 | 0.152 |
| MCTP21   | 5.97E-298 | 0.293282852 | 0.416 | 0.191 |
| MTFR1    | 6.65E-298 | 0.561771341 | 0.396 | 0.185 |
| SYPL1    | 1.10E-297 | 0.581031479 | 0.413 | 0.205 |
| PWP1     | 2.63E-296 | 0.607750002 | 0.403 | 0.198 |
| CD2AP    | 3.19E-296 | 0.736829901 | 0.503 | 0.289 |
| PTMA     | 4.36E-293 | 0.430185028 | 0.986 | 0.945 |
| APPL1    | 1.65E-290 | 0.618865217 | 0.409 | 0.208 |
| MAP3K1   | 9.76E-289 | 0.712387305 | 0.564 | 0.343 |
| LTB1     | 6.19E-288 | 0.301461022 | 0.697 | 0.407 |
| EIF4G3   | 1.32E-287 | 0.598990648 | 0.661 | 0.445 |
| SMC6     | 1.68E-286 | 0.605356159 | 0.375 | 0.176 |
| FAM13B   | 1.70E-285 | 0.648948699 | 0.597 | 0.383 |
| EIF3E1   | 4.21E-285 | 0.521914924 | 0.825 | 0.661 |
| RNMT     | 4.22E-284 | 0.614561946 | 0.623 | 0.413 |
| CIITA    | 1.00E-282 | 0.501016632 | 0.32  | 0.132 |
| TRIM44   | 3.27E-279 | 0.636645365 | 0.466 | 0.262 |
| CMTM6    | 2.99E-278 | 0.551560112 | 0.638 | 0.413 |
| DENND3   | 4.09E-278 | 0.56137206  | 0.339 | 0.155 |
| PILRB    | 5.86E-278 | 0.521890358 | 0.328 | 0.142 |
| TNRC6B1  | 7.09E-277 | 0.528174241 | 0.845 | 0.681 |
| RAB11A1  | 1.06E-276 | 0.684254733 | 0.762 | 0.593 |
| C7orf50  | 1.71E-276 | 0.614006592 | 0.465 | 0.261 |
| ZCCHC10  | 9.30E-276 | 0.622888807 | 0.459 | 0.253 |
| FCGR2B   | 5.09E-274 | 0.450127148 | 0.275 | 0.108 |
| MTMR6    | 5.29E-274 | 0.642224558 | 0.49  | 0.285 |
| AGPAT5   | 2.54E-273 | 0.768398799 | 0.395 | 0.195 |
| LRRFIP1  | 8.18E-273 | 0.699566078 | 0.819 | 0.66  |
| BBX      | 3.18E-272 | 0.595015846 | 0.696 | 0.496 |
| SP140L   | 1.08E-271 | 0.604136594 | 0.529 | 0.315 |
| SIPA1    | 4.66E-271 | 0.52817384  | 0.38  | 0.186 |
| RIC3     | 1.17E-270 | 0.469572295 | 0.275 | 0.105 |
| FILIP1L1 | 7.28E-269 | 0.85124802  | 0.538 | 0.319 |
| EAF2     | 1.40E-268 | 0.596498236 | 0.297 | 0.127 |
| RHBDD1   | 4.12E-266 | 0.713796669 | 0.414 | 0.217 |
| RBM26    | 1.08E-265 | 0.676104326 | 0.542 | 0.342 |
| ILRUN    | 1.27E-265 | 0.631082993 | 0.469 | 0.27  |
| SSBP2    | 6.27E-265 | 0.666262105 | 0.482 | 0.269 |
| MDM4     | 1.32E-264 | 0.588967682 | 0.559 | 0.351 |
| ZNF107   | 1.75E-264 | 0.623471421 | 0.369 | 0.178 |

|             |           |             |       |       |
|-------------|-----------|-------------|-------|-------|
| MTPN        | 2.33E-263 | 0.575232853 | 0.666 | 0.469 |
| TGFBR21     | 2.89E-263 | 0.724005503 | 0.625 | 0.42  |
| HIF1A       | 8.93E-263 | 0.446871317 | 0.743 | 0.522 |
| STX5        | 4.04E-261 | 0.652488475 | 0.501 | 0.305 |
| CEP170      | 4.20E-259 | 0.698078137 | 0.422 | 0.226 |
| CHD9        | 1.19E-256 | 0.63092077  | 0.49  | 0.291 |
| SNHG7       | 2.60E-256 | 0.572835981 | 0.529 | 0.321 |
| ELF1        | 3.87E-256 | 0.443849922 | 0.945 | 0.849 |
| CD48        | 4.46E-256 | 0.509538094 | 0.778 | 0.575 |
| LIMD2       | 1.26E-255 | 0.540851731 | 0.618 | 0.387 |
| LMBRD1      | 2.44E-255 | 0.675292395 | 0.537 | 0.34  |
| TRAF51      | 4.06E-255 | 0.580260628 | 0.453 | 0.245 |
| PABPC11     | 9.67E-255 | 0.37137635  | 0.95  | 0.835 |
| ZNF141      | 7.55E-253 | 0.597880678 | 0.297 | 0.13  |
| SLC12A6     | 1.43E-250 | 0.698396492 | 0.421 | 0.228 |
| DTNBP1      | 1.74E-249 | 0.66828583  | 0.435 | 0.246 |
| SMDT1       | 4.78E-249 | 0.558948618 | 0.67  | 0.484 |
| GAB2        | 2.23E-248 | 0.666556673 | 0.512 | 0.302 |
| IMMP2L1     | 8.36E-248 | 0.844988545 | 0.485 | 0.286 |
| ELL2        | 1.02E-247 | 0.558062359 | 0.782 | 0.6   |
| ELMO1       | 4.10E-246 | 0.456012233 | 0.84  | 0.678 |
| BTBD9       | 1.95E-244 | 0.726541004 | 0.686 | 0.508 |
| ATP2B1      | 7.82E-240 | 0.325119761 | 0.829 | 0.622 |
| ERGIC1      | 1.31E-239 | 0.549292962 | 0.445 | 0.255 |
| TCOF1       | 4.07E-239 | 0.535770232 | 0.338 | 0.163 |
| BOD1L1      | 5.42E-239 | 0.585550042 | 0.632 | 0.447 |
| CD691       | 6.09E-239 | 0.645135176 | 0.762 | 0.546 |
| TPK1        | 6.80E-237 | 0.725240853 | 0.388 | 0.208 |
| NFATC1      | 9.68E-237 | 0.569486961 | 0.437 | 0.24  |
| PARP14      | 1.42E-236 | 0.601334194 | 0.582 | 0.387 |
| ADD31       | 1.68E-236 | 0.666520396 | 0.535 | 0.332 |
| STAT6       | 6.22E-235 | 0.525585557 | 0.316 | 0.15  |
| PALM2-AKAP2 | 6.47E-235 | 0.559403276 | 0.372 | 0.189 |
| SLC37A1     | 2.03E-234 | 0.483313221 | 0.267 | 0.112 |
| EEF1D1      | 4.31E-233 | 0.383899388 | 0.939 | 0.853 |
| AP1S3       | 9.15E-231 | 0.588467832 | 0.254 | 0.105 |
| TXNIP1      | 4.48E-230 | 0.455395888 | 0.87  | 0.702 |
| TBC1D9      | 2.33E-227 | 0.581289914 | 0.267 | 0.116 |
| SNU13       | 3.17E-227 | 0.539092846 | 0.739 | 0.583 |
| NR3C2       | 6.12E-227 | 0.690362763 | 0.273 | 0.115 |
| RAB3GAP1    | 1.45E-226 | 0.554096573 | 0.558 | 0.363 |
| STK17A1     | 7.67E-226 | 0.513426792 | 0.805 | 0.626 |
| CNTRL       | 1.11E-225 | 0.605289008 | 0.532 | 0.342 |

|            |           |             |       |       |
|------------|-----------|-------------|-------|-------|
| USP12      | 2.57E-224 | 0.582879481 | 0.564 | 0.365 |
| PMEPA1     | 1.95E-223 | 0.636750267 | 0.459 | 0.268 |
| USP24      | 5.07E-223 | 0.650372228 | 0.483 | 0.296 |
| PRKD3      | 2.53E-221 | 0.526069981 | 0.33  | 0.161 |
| SP110      | 1.81E-220 | 0.536525605 | 0.636 | 0.437 |
| TP53INP1   | 2.68E-219 | 0.639003742 | 0.449 | 0.26  |
| ZBTB20     | 9.43E-218 | 0.466860144 | 0.851 | 0.699 |
| SERP1      | 2.24E-217 | 0.470085606 | 0.809 | 0.661 |
| MAP3K8     | 2.21E-216 | 0.566881013 | 0.607 | 0.397 |
| NFX1       | 1.16E-215 | 0.587362441 | 0.404 | 0.23  |
| MAN1A1     | 1.69E-213 | 1.099809251 | 0.576 | 0.439 |
| PIK3AP1    | 3.11E-213 | 0.419110157 | 0.375 | 0.191 |
| AC004687.1 | 1.34E-212 | 0.459260737 | 0.257 | 0.11  |
| IL13RA1    | 2.52E-212 | 0.52911265  | 0.261 | 0.115 |
| AGO2       | 2.63E-212 | 0.530680916 | 0.651 | 0.475 |
| MOB3A      | 2.92E-211 | 0.566035566 | 0.5   | 0.319 |
| KLF7       | 6.43E-211 | 0.530244956 | 0.311 | 0.152 |
| ZFP36L21   | 8.51E-211 | 0.37781351  | 0.921 | 0.802 |
| EVI5       | 2.45E-209 | 0.641153335 | 0.332 | 0.174 |
| TMEM62     | 8.06E-207 | 0.535322103 | 0.26  | 0.116 |
| MFSD4B     | 7.46E-206 | 0.528916129 | 0.402 | 0.226 |
| USPL1      | 1.22E-205 | 0.479052942 | 0.488 | 0.3   |
| CALHM6     | 9.19E-205 | 0.316342242 | 0.254 | 0.107 |
| RGS19      | 1.39E-204 | 0.52363923  | 0.359 | 0.194 |
| PACS11     | 9.41E-202 | 0.725423891 | 0.647 | 0.475 |
| TAF4B      | 1.22E-201 | 0.465833028 | 0.369 | 0.191 |
| UXT        | 9.44E-200 | 0.46295855  | 0.681 | 0.511 |
| RBM391     | 1.13E-198 | 0.358586986 | 0.944 | 0.856 |
| PDE8A      | 1.15E-198 | 0.562716301 | 0.45  | 0.268 |
| FNIP1      | 2.61E-197 | 0.530433245 | 0.617 | 0.444 |
| AL035634.1 | 1.84E-196 | 0.40297705  | 0.267 | 0.119 |
| C9orf72    | 4.18E-196 | 0.379894326 | 0.419 | 0.237 |
| CCDC6      | 7.28E-196 | 0.4761099   | 0.531 | 0.341 |
| DYRK1A     | 1.08E-195 | 0.502313428 | 0.714 | 0.554 |
| STX17-AS1  | 8.80E-194 | 0.568706034 | 0.292 | 0.142 |
| DLEU1      | 1.92E-193 | 0.541675867 | 0.464 | 0.283 |
| PIK3CA     | 3.63E-193 | 0.608624184 | 0.38  | 0.217 |
| SNHG29     | 6.28E-193 | 0.372819633 | 0.803 | 0.652 |
| PELI2      | 3.69E-191 | 0.490178176 | 0.321 | 0.159 |
| SIK3       | 6.19E-191 | 0.384696846 | 0.914 | 0.806 |
| NR4A3      | 1.08E-190 | 0.750696892 | 0.53  | 0.347 |
| SPOPL      | 8.54E-190 | 0.479872201 | 0.322 | 0.167 |
| RBM6       | 1.18E-189 | 0.499046248 | 0.651 | 0.488 |

|           |           |             |       |       |
|-----------|-----------|-------------|-------|-------|
| EBLN3P    | 2.26E-188 | 0.442940827 | 0.307 | 0.154 |
| UTY1      | 5.24E-188 | 0.483060532 | 0.526 | 0.331 |
| SAMD4A    | 3.01E-187 | 0.566296476 | 0.265 | 0.122 |
| SLC25A6   | 3.43E-187 | 0.437247325 | 0.822 | 0.691 |
| CCDC93    | 5.05E-187 | 0.506022646 | 0.393 | 0.229 |
| ARPC3     | 9.88E-187 | 0.36918532  | 0.895 | 0.755 |
| NSD3      | 1.85E-186 | 0.504351594 | 0.749 | 0.6   |
| SMC5      | 2.27E-186 | 0.583664976 | 0.647 | 0.492 |
| AFF4      | 2.47E-186 | 0.460831338 | 0.705 | 0.541 |
| SRPK2     | 4.22E-186 | 0.507353091 | 0.696 | 0.543 |
| DDX17     | 6.69E-186 | 0.406123553 | 0.762 | 0.622 |
| 3-Mar     | 2.43E-184 | 0.653914017 | 0.467 | 0.29  |
| BIRC31    | 8.12E-184 | 0.442609816 | 0.706 | 0.522 |
| KLF31     | 1.93E-182 | 0.610180193 | 0.389 | 0.225 |
| PUM2      | 2.21E-182 | 0.450198944 | 0.68  | 0.52  |
| SYNGR2    | 2.47E-181 | 0.497386751 | 0.415 | 0.25  |
| ATL2      | 3.78E-181 | 0.464612259 | 0.363 | 0.202 |
| SEPTIN71  | 4.03E-181 | 0.405684967 | 0.849 | 0.726 |
| GIT2      | 4.56E-181 | 0.570128712 | 0.377 | 0.22  |
| SNX3      | 1.17E-180 | 0.44798734  | 0.611 | 0.439 |
| POLD4     | 1.28E-180 | 0.546628333 | 0.511 | 0.35  |
| SRGAP2    | 1.33E-180 | 0.535008049 | 0.417 | 0.251 |
| PAK1      | 3.20E-180 | 0.642564514 | 0.315 | 0.167 |
| MARCKSL1  | 4.20E-180 | 0.456932169 | 0.422 | 0.246 |
| LINC01473 | 8.78E-180 | 0.642578405 | 0.263 | 0.125 |
| SIRT1     | 1.26E-178 | 0.473953687 | 0.419 | 0.25  |
| HCG18     | 4.08E-178 | 0.529596841 | 0.339 | 0.183 |
| EIF1B     | 4.75E-178 | 0.481219536 | 0.539 | 0.374 |
| ARL4A     | 6.54E-178 | 0.514106247 | 0.455 | 0.28  |
| GNPTAB1   | 1.88E-177 | 0.521031338 | 0.481 | 0.309 |
| SETX      | 2.40E-177 | 0.513074294 | 0.578 | 0.412 |
| GOT1      | 5.91E-177 | 0.649473523 | 0.283 | 0.142 |
| RHOQ      | 5.94E-177 | 0.416762677 | 0.379 | 0.212 |
| FYTTD1    | 1.42E-176 | 0.50647159  | 0.414 | 0.256 |
| PPP4R3A   | 2.56E-176 | 0.45507628  | 0.645 | 0.481 |
| WDR43     | 3.80E-176 | 0.454357191 | 0.417 | 0.251 |
| CHCHD10   | 7.77E-176 | 0.470629972 | 0.517 | 0.355 |
| RNF1381   | 3.04E-175 | 0.466720979 | 0.47  | 0.294 |
| PPM1K     | 2.12E-174 | 0.491363827 | 0.51  | 0.336 |
| KLHL24    | 3.66E-174 | 0.596887188 | 0.476 | 0.317 |
| NRIP1     | 5.47E-174 | 0.467637284 | 0.42  | 0.252 |
| AMZ1      | 9.68E-174 | 0.429733555 | 0.254 | 0.12  |
| RHBDF2    | 2.54E-173 | 0.486415879 | 0.341 | 0.19  |

|            |           |             |       |       |
|------------|-----------|-------------|-------|-------|
| AC104365.1 | 5.24E-173 | 0.476368575 | 0.376 | 0.212 |
| MBNL2      | 1.30E-171 | 0.489436854 | 0.587 | 0.416 |
| ABCY11     | 2.88E-171 | 0.456830532 | 0.253 | 0.115 |
| TMEM154    | 1.25E-170 | 0.42531427  | 0.363 | 0.201 |
| ZNF506     | 4.56E-170 | 0.429213195 | 0.357 | 0.197 |
| PEAK1      | 6.51E-170 | 0.554412466 | 0.382 | 0.222 |
| RPA2       | 1.96E-169 | 0.425723906 | 0.349 | 0.197 |
| SREBF2     | 4.60E-169 | 0.461939533 | 0.467 | 0.296 |
| TOMM71     | 1.03E-167 | 0.336754526 | 0.864 | 0.748 |
| AC008014.1 | 2.75E-167 | 0.663947246 | 0.287 | 0.148 |
| AC092120.3 | 3.42E-167 | 0.402617157 | 0.263 | 0.127 |
| ATF7IP     | 3.93E-167 | 0.644496772 | 0.737 | 0.599 |
| CASD1      | 1.45E-165 | 0.486794444 | 0.299 | 0.156 |
| SEC62      | 4.70E-165 | 0.442724296 | 0.681 | 0.545 |
| BANP       | 3.71E-164 | 0.508111049 | 0.487 | 0.321 |
| TBC1D1     | 4.79E-163 | 0.493769618 | 0.465 | 0.308 |
| LRCH1      | 7.41E-163 | 0.601145951 | 0.43  | 0.275 |
| RCN2       | 9.96E-163 | 0.430025159 | 0.324 | 0.179 |
| CDK13      | 2.24E-162 | 0.477402309 | 0.639 | 0.487 |
| CYFIP2     | 4.90E-162 | 0.419527969 | 0.511 | 0.331 |
| COMMD10    | 3.55E-161 | 0.621295513 | 0.521 | 0.369 |
| CD47       | 9.10E-161 | 0.457821709 | 0.594 | 0.439 |
| SCAF11     | 2.64E-160 | 0.432623967 | 0.745 | 0.615 |
| FAM214A    | 6.41E-160 | 0.505763134 | 0.551 | 0.385 |
| RAD51B     | 1.06E-158 | 0.651423613 | 0.508 | 0.353 |
| UPF2       | 1.50E-158 | 0.529233372 | 0.459 | 0.308 |
| MECP21     | 1.80E-158 | 0.477988836 | 0.595 | 0.439 |
| IL4R       | 2.54E-158 | 0.671296153 | 0.407 | 0.264 |
| PPP3CA     | 8.11E-158 | 0.441163384 | 0.62  | 0.447 |
| MFN1       | 2.99E-157 | 0.420391725 | 0.283 | 0.148 |
| AC007384.1 | 1.25E-156 | 0.530660096 | 0.584 | 0.425 |
| STK41      | 3.39E-156 | 0.319551017 | 0.889 | 0.771 |
| EIF4B      | 3.43E-156 | 0.39351967  | 0.661 | 0.514 |
| MIR29B2CHG | 4.38E-156 | 0.432225567 | 0.315 | 0.173 |
| TMEM117    | 1.04E-155 | 0.624072473 | 0.297 | 0.159 |
| OOEP       | 1.90E-155 | 0.407135756 | 0.424 | 0.265 |
| MTMR1      | 1.55E-154 | 0.414139355 | 0.275 | 0.141 |
| SIK2       | 6.13E-154 | 0.637366802 | 0.464 | 0.31  |
| CLASP2     | 9.56E-154 | 0.477875328 | 0.568 | 0.408 |
| TENT2      | 1.27E-152 | 0.466287134 | 0.6   | 0.452 |
| SNHG8      | 1.86E-152 | 0.436103916 | 0.586 | 0.434 |
| PIAS1      | 7.71E-152 | 0.423804372 | 0.647 | 0.504 |
| RABGAP1    | 2.41E-151 | 0.486167034 | 0.398 | 0.25  |

|              |           |             |       |       |
|--------------|-----------|-------------|-------|-------|
| GRB2         | 4.83E-151 | 0.323068921 | 0.738 | 0.58  |
| CHD1         | 5.63E-151 | 0.373519588 | 0.726 | 0.585 |
| DDX27        | 3.35E-149 | 0.44312107  | 0.44  | 0.288 |
| IDI1         | 4.83E-149 | 0.484118508 | 0.628 | 0.481 |
| CNPY3        | 6.03E-148 | 0.436038269 | 0.38  | 0.237 |
| DIP2B        | 6.39E-148 | 0.423559395 | 0.513 | 0.353 |
| LAPTM4A      | 8.80E-148 | 0.458928959 | 0.475 | 0.328 |
| USF3         | 9.34E-148 | 0.424415679 | 0.292 | 0.157 |
| BTF3         | 4.19E-146 | 0.310790691 | 0.898 | 0.79  |
| LINC-PINT1   | 1.42E-145 | 0.376546391 | 0.781 | 0.646 |
| STAG11       | 5.05E-144 | 0.362634626 | 0.808 | 0.693 |
| AL050309.1   | 2.89E-143 | 0.67759537  | 0.251 | 0.128 |
| EIF2S3       | 7.03E-143 | 0.405431056 | 0.503 | 0.356 |
| HIF1A-AS3    | 1.20E-142 | 0.339363675 | 0.309 | 0.172 |
| SLC38A11     | 1.72E-142 | 0.430026243 | 0.75  | 0.596 |
| DCK          | 2.23E-142 | 0.375832601 | 0.258 | 0.133 |
| CDYL         | 2.32E-142 | 0.55450234  | 0.423 | 0.281 |
| RILPL2       | 2.36E-141 | 0.400498764 | 0.584 | 0.424 |
| USP9Y1       | 9.79E-141 | 0.394638792 | 0.407 | 0.246 |
| RBFOX2       | 2.06E-140 | 0.40433908  | 0.506 | 0.355 |
| SPIDR        | 2.19E-140 | 0.503025038 | 0.596 | 0.452 |
| EIF3L        | 3.92E-140 | 0.418894675 | 0.517 | 0.369 |
| PPARD        | 7.75E-140 | 0.410306207 | 0.351 | 0.208 |
| ARIH1        | 3.15E-139 | 0.374191299 | 0.854 | 0.744 |
| EPB41L4A-AS1 | 3.26E-139 | 0.391243764 | 0.379 | 0.232 |
| ATP1B3       | 4.18E-139 | 0.801017567 | 0.737 | 0.644 |
| ZNF148       | 1.43E-137 | 0.434198651 | 0.562 | 0.417 |
| GDI2         | 6.48E-137 | 0.440066583 | 0.557 | 0.411 |
| ZSWIM6       | 1.34E-136 | 0.357544725 | 0.763 | 0.618 |
| CCNY         | 4.39E-136 | 0.481144818 | 0.591 | 0.451 |
| AIDA         | 5.83E-136 | 0.400007211 | 0.292 | 0.165 |
| ERP29        | 6.91E-136 | 0.398558908 | 0.645 | 0.51  |
| MYCBP2-AS1   | 1.42E-135 | 0.336902939 | 0.258 | 0.132 |
| ZFP36L1      | 1.21E-134 | 0.37524994  | 0.641 | 0.48  |
| MGMT         | 5.21E-134 | 0.59115566  | 0.441 | 0.309 |
| CSNK1D       | 5.77E-134 | 0.397479013 | 0.54  | 0.395 |
| CD53         | 9.05E-134 | 0.322024753 | 0.828 | 0.694 |
| GLO1         | 1.07E-133 | 0.432313651 | 0.324 | 0.195 |
| MOB1A        | 4.29E-133 | 0.378932599 | 0.609 | 0.46  |
| MED30        | 8.58E-133 | 0.389680633 | 0.324 | 0.189 |
| RARA         | 8.85E-133 | 0.381771613 | 0.318 | 0.185 |
| PHKB         | 9.86E-133 | 0.455779029 | 0.435 | 0.292 |
| SH3BGRL      | 7.15E-132 | 0.419341917 | 0.663 | 0.529 |

|            |           |             |       |       |
|------------|-----------|-------------|-------|-------|
| PUM1       | 8.72E-132 | 0.365943292 | 0.647 | 0.511 |
| AC245297.3 | 1.45E-131 | 0.40255008  | 0.406 | 0.259 |
| TCEA1      | 2.00E-131 | 0.417095864 | 0.612 | 0.476 |
| ITPR2      | 3.11E-131 | 0.452308231 | 0.633 | 0.49  |
| ZNF644     | 4.95E-131 | 0.392023872 | 0.696 | 0.565 |
| BICD1      | 1.19E-130 | 0.423266174 | 0.362 | 0.219 |
| SENP6      | 1.81E-130 | 0.406306029 | 0.603 | 0.464 |
| NRF1       | 5.59E-130 | 0.422566618 | 0.459 | 0.31  |
| CYTIP      | 6.05E-130 | 0.362265764 | 0.847 | 0.745 |
| FBXW11     | 6.31E-130 | 0.403391024 | 0.545 | 0.397 |
| IFNGR2     | 2.09E-129 | 0.322369268 | 0.344 | 0.202 |
| SBNO1      | 2.18E-128 | 0.430329811 | 0.408 | 0.268 |
| SMARCB1    | 2.37E-128 | 0.391142279 | 0.31  | 0.183 |
| KAT6A1     | 2.85E-128 | 0.392259097 | 0.677 | 0.547 |
| USP361     | 6.07E-128 | 0.520708995 | 0.563 | 0.418 |
| PPIG       | 2.24E-127 | 0.408145817 | 0.634 | 0.505 |
| SEPTIN9    | 3.64E-127 | 0.369613266 | 0.582 | 0.433 |
| RSL24D1    | 4.37E-127 | 0.410509363 | 0.571 | 0.433 |
| SYS1       | 5.53E-127 | 0.403409264 | 0.322 | 0.192 |
| TASP1      | 8.77E-127 | 0.411813227 | 0.288 | 0.16  |
| LPGAT1     | 2.16E-126 | 0.380861394 | 0.355 | 0.22  |
| FAM76B     | 3.96E-126 | 0.369768681 | 0.314 | 0.182 |
| TRAF3      | 5.28E-126 | 0.313545138 | 0.726 | 0.572 |
| RUFY1      | 1.91E-125 | 0.431108857 | 0.347 | 0.218 |
| MED13L     | 3.31E-125 | 0.328555779 | 0.718 | 0.581 |
| SS18       | 7.33E-125 | 0.412232621 | 0.412 | 0.273 |
| ZFAND6     | 1.43E-123 | 0.41297487  | 0.611 | 0.485 |
| PARP1      | 1.69E-123 | 0.395243271 | 0.48  | 0.337 |
| WIPF2      | 2.81E-123 | 0.44090539  | 0.367 | 0.235 |
| RRP15      | 2.85E-122 | 0.348583135 | 0.272 | 0.15  |
| ZNF721     | 4.28E-122 | 0.381179627 | 0.436 | 0.293 |
| FBXO11     | 7.50E-122 | 0.423325293 | 0.659 | 0.525 |
| SCAPER     | 1.14E-121 | 0.478431481 | 0.476 | 0.337 |
| PCGF5      | 8.20E-121 | 0.491403148 | 0.558 | 0.432 |
| HNRNPK     | 1.10E-120 | 0.325365018 | 0.758 | 0.631 |
| TGFBR1     | 3.30E-120 | 0.467024371 | 0.285 | 0.166 |
| ARHGEF7    | 3.40E-120 | 0.572058451 | 0.484 | 0.354 |
| EIF3D      | 4.91E-120 | 0.358066664 | 0.592 | 0.457 |
| FAM133B    | 1.10E-119 | 0.375147998 | 0.627 | 0.502 |
| ATF6       | 1.41E-119 | 0.459723522 | 0.552 | 0.413 |
| HTT        | 3.21E-119 | 0.424059206 | 0.389 | 0.256 |
| NIPBL      | 5.66E-119 | 0.345315785 | 0.731 | 0.613 |
| CD164      | 6.38E-119 | 0.39180518  | 0.622 | 0.499 |



|           |           |             |       |       |
|-----------|-----------|-------------|-------|-------|
| TRA2A     | 1.81E-118 | 0.368474698 | 0.708 | 0.591 |
| RAB11FIP1 | 2.11E-117 | 0.341580536 | 0.633 | 0.477 |
| PPP6R3    | 1.32E-116 | 0.350405659 | 0.669 | 0.538 |
| SELENOO   | 2.79E-116 | 0.370887122 | 0.29  | 0.17  |
| SLBP      | 5.31E-116 | 0.395985799 | 0.491 | 0.349 |
| DBNL      | 9.86E-116 | 0.37900208  | 0.39  | 0.261 |
| FBL       | 1.11E-115 | 0.353966923 | 0.389 | 0.257 |
| DOCK2     | 1.15E-115 | 0.340029026 | 0.698 | 0.566 |
| HNRNPA1   | 1.99E-115 | 0.27294404  | 0.884 | 0.784 |
| EIF3F     | 9.25E-115 | 0.307373922 | 0.706 | 0.573 |
| 6-Mar     | 1.20E-114 | 0.373647249 | 0.599 | 0.468 |
| SETD21    | 2.02E-114 | 0.428278985 | 0.64  | 0.516 |
| SCFD2     | 3.70E-114 | 0.505653073 | 0.354 | 0.229 |
| CKAP2     | 5.90E-114 | 0.464373586 | 0.265 | 0.15  |
| SASH3     | 1.47E-113 | 0.388513818 | 0.263 | 0.15  |
| EPC21     | 1.49E-113 | 0.368831542 | 0.561 | 0.424 |
| NUP153    | 3.75E-113 | 0.376198812 | 0.43  | 0.295 |
| CLCN3     | 9.78E-113 | 0.53486115  | 0.307 | 0.19  |
| OFD1      | 8.03E-112 | 0.361274098 | 0.488 | 0.343 |
| CDK19     | 8.68E-112 | 0.45631016  | 0.308 | 0.189 |
| CYSTM1    | 2.64E-111 | 0.388579194 | 0.444 | 0.318 |
| INO80     | 1.03E-110 | 0.367644835 | 0.445 | 0.309 |
| CREBBP    | 4.01E-110 | 0.317549344 | 0.637 | 0.505 |
| PLEKHM2   | 1.64E-109 | 0.382993349 | 0.335 | 0.215 |
| DOCK11    | 4.48E-109 | 0.414817336 | 0.443 | 0.314 |
| LARP4B    | 4.51E-109 | 0.40212254  | 0.511 | 0.384 |
| KPNA5     | 8.69E-109 | 0.346060112 | 0.296 | 0.173 |
| COP1      | 3.03E-108 | 0.331840597 | 0.643 | 0.516 |
| WDPCP     | 3.04E-108 | 0.513491356 | 0.316 | 0.196 |
| MTREX     | 4.02E-108 | 0.376103245 | 0.447 | 0.314 |
| FAM3C1    | 4.46E-108 | 0.353140097 | 0.381 | 0.251 |
| PHF3      | 6.75E-108 | 0.346923811 | 0.57  | 0.437 |
| BRD4      | 8.71E-108 | 0.359197157 | 0.588 | 0.466 |
| DDIT3     | 1.37E-107 | 0.389868051 | 0.333 | 0.209 |
| RCOR1     | 2.23E-107 | 0.396037398 | 0.532 | 0.395 |
| TGIF1     | 5.45E-107 | 0.411974603 | 0.378 | 0.251 |
| SETD5     | 6.77E-107 | 0.38615224  | 0.48  | 0.35  |
| CYB5R4    | 6.87E-107 | 0.335964371 | 0.402 | 0.275 |
| SHOC2     | 7.76E-107 | 0.377279127 | 0.472 | 0.346 |
| SLC25A33  | 5.11E-106 | 0.369517487 | 0.332 | 0.211 |
| XKR6      | 5.40E-106 | 0.41558524  | 0.382 | 0.253 |
| CWF19L2   | 1.33E-105 | 0.318344097 | 0.487 | 0.342 |
| NEK1      | 8.24E-105 | 0.734004528 | 0.421 | 0.3   |

|            |           |             |       |       |
|------------|-----------|-------------|-------|-------|
| AC092821.3 | 1.11E-104 | 0.358166028 | 0.392 | 0.26  |
| SELENOF    | 1.58E-104 | 0.360346595 | 0.553 | 0.436 |
| GTPBP1     | 1.67E-104 | 0.268166102 | 0.389 | 0.262 |
| USP9X      | 2.73E-104 | 0.331241113 | 0.612 | 0.483 |
| ZMYM2      | 6.11E-103 | 0.657304886 | 0.558 | 0.448 |
| AC025164.1 | 7.67E-103 | 0.378387773 | 0.325 | 0.201 |
| MIS18BP1   | 1.08E-102 | 0.428062581 | 0.428 | 0.303 |
| SCPEP1     | 1.13E-102 | 0.367712815 | 0.256 | 0.151 |
| WDR74      | 1.73E-101 | 0.366180364 | 0.5   | 0.366 |
| MKMK2      | 1.84E-101 | 0.356213284 | 0.382 | 0.259 |
| NSA2       | 2.04E-101 | 0.326926973 | 0.622 | 0.504 |
| CACUL1     | 2.33E-101 | 0.383280165 | 0.302 | 0.191 |
| CUL31      | 3.08E-101 | 0.309526648 | 0.743 | 0.626 |
| MCPH1      | 4.14E-101 | 0.395494047 | 0.38  | 0.254 |
| LRRC41     | 6.86E-101 | 0.375900289 | 0.273 | 0.165 |
| EIF3H      | 9.95E-101 | 0.277219692 | 0.775 | 0.666 |
| CMTM71     | 1.29E-100 | 0.45836488  | 0.498 | 0.381 |
| WAC        | 3.36E-100 | 0.309468623 | 0.724 | 0.612 |
| RNPS1      | 1.93E-98  | 0.336971622 | 0.471 | 0.346 |
| HNRNPD     | 3.65E-98  | 0.312164394 | 0.666 | 0.552 |
| HMGN1      | 4.23E-98  | 0.288904664 | 0.711 | 0.583 |
| MAPK1IP1L  | 6.84E-98  | 0.351714174 | 0.519 | 0.402 |
| GPBP1      | 9.36E-98  | 0.251667726 | 0.817 | 0.709 |
| DDX10      | 9.49E-98  | 0.383399904 | 0.313 | 0.197 |
| HEXA       | 1.09E-97  | 0.452923619 | 0.37  | 0.252 |
| SLC35F5    | 3.59E-97  | 0.358502585 | 0.251 | 0.148 |
| MAP3K2     | 6.19E-97  | 0.294843759 | 0.701 | 0.586 |
| ZBTB44     | 1.35E-96  | 0.382555034 | 0.335 | 0.217 |
| SNX10      | 2.16E-96  | 0.301497132 | 0.295 | 0.182 |
| ZNF791     | 2.21E-96  | 0.358366274 | 0.284 | 0.176 |
| SDE2       | 3.50E-96  | 0.322752942 | 0.289 | 0.179 |
| KIAA0355   | 3.62E-96  | 0.295394745 | 0.292 | 0.177 |
| PTBP2      | 4.57E-96  | 0.373454608 | 0.399 | 0.277 |
| CIRBP1     | 8.64E-96  | 0.2527355   | 0.811 | 0.699 |
| CCNI       | 2.48E-95  | 0.253668762 | 0.823 | 0.723 |
| GTF2F2     | 3.57E-95  | 0.377094203 | 0.391 | 0.273 |
| NAA15      | 5.29E-95  | 0.335482623 | 0.394 | 0.272 |
| PHF10      | 9.42E-95  | 0.331545288 | 0.258 | 0.154 |
| HPS5       | 6.29E-94  | 0.363814861 | 0.323 | 0.211 |
| LAMTOR5    | 7.54E-94  | 0.389587244 | 0.489 | 0.378 |
| CNOT4      | 7.61E-93  | 0.342232595 | 0.54  | 0.418 |
| ABCB7      | 5.93E-92  | 0.34660941  | 0.303 | 0.193 |
| LRPPRC     | 1.53E-91  | 0.327410924 | 0.374 | 0.255 |

|            |          |             |       |       |
|------------|----------|-------------|-------|-------|
| MGA        | 1.79E-91 | 0.35673878  | 0.335 | 0.221 |
| SLC35D1    | 2.01E-91 | 0.437054521 | 0.287 | 0.179 |
| ZFY        | 2.66E-91 | 0.356139732 | 0.271 | 0.162 |
| SINHCAF    | 6.27E-91 | 0.352196532 | 0.392 | 0.273 |
| PPP4R3B    | 2.42E-90 | 0.304044422 | 0.525 | 0.405 |
| RAB8B      | 3.55E-90 | 0.361843275 | 0.631 | 0.514 |
| ATM1       | 4.56E-90 | 0.308391896 | 0.597 | 0.474 |
| LINC02245  | 7.75E-90 | 0.355527096 | 0.32  | 0.21  |
| AC118549.1 | 1.15E-89 | 0.353239548 | 0.402 | 0.282 |
| KPNB1      | 2.82E-89 | 0.359985397 | 0.487 | 0.377 |
| MON2       | 3.02E-89 | 0.343348313 | 0.555 | 0.442 |
| NSF        | 6.19E-89 | 0.362077566 | 0.347 | 0.235 |
| UQCRH      | 7.55E-89 | 0.277747231 | 0.734 | 0.631 |
| PTDSS1     | 2.19E-88 | 0.340705761 | 0.279 | 0.176 |
| SECISBP2L  | 3.59E-88 | 0.392967915 | 0.336 | 0.227 |
| FER        | 4.13E-88 | 0.393911726 | 0.299 | 0.192 |
| RSF1       | 1.58E-87 | 0.331658991 | 0.568 | 0.456 |
| RFX31      | 2.47E-87 | 0.340901884 | 0.554 | 0.429 |
| TNPO1      | 6.38E-87 | 0.392099011 | 0.438 | 0.325 |
| MALT1      | 1.71E-86 | 0.255565538 | 0.668 | 0.542 |
| COMMD61    | 5.35E-86 | 0.253878592 | 0.739 | 0.627 |
| MICU2      | 6.57E-86 | 0.415103994 | 0.466 | 0.355 |
| TET3       | 7.21E-86 | 0.389879619 | 0.27  | 0.17  |
| OSGEP      | 7.71E-86 | 0.279092541 | 0.25  | 0.152 |
| AC068282.1 | 8.77E-86 | 0.333660807 | 0.4   | 0.279 |
| IQCB1      | 2.49E-85 | 0.358998413 | 0.359 | 0.246 |
| TRPM7      | 6.46E-85 | 0.343762246 | 0.536 | 0.424 |
| TCERG1     | 9.50E-85 | 0.323498067 | 0.374 | 0.262 |
| HNRNPDL    | 1.29E-84 | 0.274552006 | 0.755 | 0.658 |
| ZFAND3     | 1.91E-84 | 0.256085202 | 0.746 | 0.637 |
| UCP2       | 2.27E-84 | 0.332493172 | 0.521 | 0.399 |
| SET        | 2.40E-84 | 0.286658828 | 0.662 | 0.552 |
| WWP2       | 7.19E-84 | 0.316369176 | 0.411 | 0.297 |
| ZNF652     | 1.08E-83 | 0.302979223 | 0.299 | 0.192 |
| ARHGAP51   | 1.92E-83 | 0.391320436 | 0.332 | 0.223 |
| UIMC1      | 3.83E-83 | 0.348852239 | 0.356 | 0.247 |
| MDN1       | 4.11E-83 | 0.333806495 | 0.297 | 0.19  |
| EDEM1      | 1.18E-82 | 0.332536354 | 0.339 | 0.234 |
| ANKRD17    | 2.31E-82 | 0.323725624 | 0.657 | 0.557 |
| THRAP3     | 1.30E-81 | 0.304902657 | 0.658 | 0.556 |
| TSC22D2    | 2.15E-81 | 0.286952149 | 0.473 | 0.351 |
| TASOR2     | 2.84E-81 | 0.373538857 | 0.423 | 0.313 |
| SCAF8      | 5.68E-81 | 0.307416774 | 0.502 | 0.383 |

|           |          |             |       |       |
|-----------|----------|-------------|-------|-------|
| NIPA2     | 9.73E-81 | 0.348598827 | 0.305 | 0.205 |
| ITCH      | 1.16E-80 | 0.324025943 | 0.476 | 0.364 |
| LCOR      | 1.30E-80 | 0.322370748 | 0.511 | 0.397 |
| SRSF10    | 5.38E-80 | 0.251520774 | 0.665 | 0.55  |
| GTF2H1    | 6.03E-80 | 0.335631049 | 0.341 | 0.236 |
| MAP4K3    | 1.02E-79 | 0.375213196 | 0.421 | 0.314 |
| APP       | 1.43E-79 | 0.25178394  | 0.273 | 0.17  |
| CYP51A1   | 3.72E-79 | 0.307949274 | 0.315 | 0.211 |
| UTP6      | 4.03E-79 | 0.286445185 | 0.271 | 0.174 |
| LINC01004 | 5.91E-79 | 0.334097564 | 0.512 | 0.405 |
| SNHG14    | 1.15E-78 | 0.286394685 | 0.371 | 0.256 |
| LUC7L3    | 4.29E-78 | 0.29001377  | 0.536 | 0.424 |
| ATR       | 1.36E-77 | 0.366634053 | 0.374 | 0.267 |
| RSL1D1    | 3.65E-77 | 0.287046814 | 0.539 | 0.428 |
| PRCP      | 5.01E-77 | 0.358598093 | 0.281 | 0.187 |
| SEC24B    | 6.27E-77 | 0.309137468 | 0.421 | 0.31  |
| TTC27     | 9.67E-77 | 0.294652725 | 0.25  | 0.153 |
| SECISBP2  | 1.10E-76 | 0.29441479  | 0.472 | 0.363 |
| PLEKHF2   | 1.79E-76 | 0.323049313 | 0.266 | 0.171 |
| CCNT1     | 2.03E-76 | 0.278171613 | 0.393 | 0.28  |
| BCL21     | 2.16E-76 | 0.357225051 | 0.648 | 0.541 |
| CBFB      | 4.58E-76 | 0.365208821 | 0.344 | 0.243 |
| POGZ      | 1.21E-75 | 0.314393099 | 0.324 | 0.223 |
| NUP214    | 1.31E-75 | 0.30695082  | 0.353 | 0.247 |
| RBM3      | 1.94E-75 | 0.257849603 | 0.657 | 0.552 |
| GALNT1    | 9.18E-75 | 0.362775282 | 0.421 | 0.322 |
| ZNF33A    | 2.99E-74 | 0.344808221 | 0.387 | 0.285 |
| ZDHHC17   | 3.48E-74 | 0.29801679  | 0.278 | 0.181 |
| DYM       | 6.73E-74 | 0.334528205 | 0.499 | 0.399 |
| ACAP2     | 2.01E-73 | 0.276307255 | 0.627 | 0.524 |
| NEMF      | 9.05E-73 | 0.330380085 | 0.458 | 0.356 |
| RBBP8     | 4.95E-72 | 0.427971137 | 0.283 | 0.187 |
| HOMER1    | 1.40E-71 | 0.466487789 | 0.284 | 0.185 |
| HSH2D     | 1.67E-71 | 0.271660822 | 0.285 | 0.186 |
| PCNX4     | 5.57E-71 | 0.406727015 | 0.386 | 0.286 |
| SELENOH   | 6.04E-71 | 0.302839614 | 0.526 | 0.422 |
| ELMSAN1   | 1.56E-70 | 0.326769113 | 0.258 | 0.169 |
| CHCHD3    | 2.50E-70 | 0.312965296 | 0.444 | 0.345 |
| GATAD2B   | 2.54E-70 | 0.297753019 | 0.496 | 0.392 |
| BLOC1S2   | 2.77E-70 | 0.305261892 | 0.36  | 0.261 |
| MAP4K5    | 3.54E-70 | 0.354380586 | 0.369 | 0.269 |
| SMARCA21  | 3.76E-70 | 0.28484644  | 0.609 | 0.503 |
| RC3H11    | 8.76E-70 | 0.277040175 | 0.591 | 0.491 |

|          |          |             |       |       |
|----------|----------|-------------|-------|-------|
| SENP5    | 1.07E-69 | 0.332803504 | 0.429 | 0.332 |
| ADPGK    | 1.65E-69 | 0.289307123 | 0.306 | 0.214 |
| MTF2     | 4.25E-69 | 0.289345701 | 0.39  | 0.284 |
| NDUFAF6  | 5.35E-69 | 0.379956178 | 0.406 | 0.302 |
| PRRC2B   | 1.97E-68 | 0.25803564  | 0.465 | 0.357 |
| SLC16A7  | 8.57E-68 | 0.279963131 | 0.269 | 0.173 |
| PCF11    | 1.20E-67 | 0.275009832 | 0.428 | 0.324 |
| SLC25A32 | 1.33E-67 | 0.270350164 | 0.286 | 0.192 |
| BDP1     | 1.59E-67 | 0.284470418 | 0.484 | 0.378 |
| ZNF431   | 1.65E-67 | 0.271447208 | 0.269 | 0.176 |
| R3HDM2   | 3.73E-67 | 0.292441464 | 0.535 | 0.432 |
| TXNRD1   | 8.13E-67 | 0.279305906 | 0.53  | 0.434 |
| LRCH3    | 8.42E-67 | 0.317940613 | 0.414 | 0.312 |
| SAFB     | 3.34E-66 | 0.269348605 | 0.451 | 0.35  |
| LPIN1    | 4.52E-66 | 0.407945291 | 0.442 | 0.351 |
| AFTPH    | 5.24E-66 | 0.298856256 | 0.443 | 0.344 |
| COPA     | 1.41E-65 | 0.286953566 | 0.544 | 0.452 |
| DHX15    | 1.61E-65 | 0.272626274 | 0.375 | 0.278 |
| PARVG    | 2.37E-65 | 0.297497491 | 0.317 | 0.225 |
| MYO1E    | 2.52E-65 | 0.426031975 | 0.277 | 0.184 |
| VPS51    | 3.93E-65 | 0.273679752 | 0.351 | 0.253 |
| NR1H2    | 1.30E-64 | 0.286269219 | 0.331 | 0.238 |
| OIP5-AS1 | 1.47E-64 | 0.279326543 | 0.324 | 0.231 |
| CCDC32   | 1.87E-64 | 0.304377431 | 0.307 | 0.216 |
| RYK      | 8.42E-64 | 0.271663346 | 0.287 | 0.193 |
| OXR1     | 8.66E-64 | 0.327303259 | 0.254 | 0.17  |
| TFAM     | 9.81E-64 | 0.257870449 | 0.303 | 0.209 |
| TTC7A    | 1.26E-63 | 0.338116648 | 0.361 | 0.268 |
| VEGFB    | 6.61E-62 | 0.265374292 | 0.279 | 0.194 |
| PDS5A    | 1.47E-61 | 0.263434447 | 0.568 | 0.47  |
| TTC37    | 3.73E-61 | 0.327508525 | 0.299 | 0.213 |
| ERBIN    | 1.62E-60 | 0.294599349 | 0.586 | 0.493 |
| CDC40    | 2.00E-60 | 0.251283177 | 0.385 | 0.287 |
| MAD1L1   | 3.24E-60 | 0.325526259 | 0.363 | 0.272 |
| MARF1    | 3.28E-60 | 0.262119426 | 0.253 | 0.168 |
| PKN2     | 3.30E-60 | 0.272738848 | 0.47  | 0.375 |
| USP111   | 9.78E-60 | 0.258964687 | 0.302 | 0.211 |
| ERC1     | 4.18E-59 | 0.302391969 | 0.494 | 0.401 |
| SLC36A4  | 4.84E-59 | 0.314397936 | 0.278 | 0.195 |
| UMAD1    | 5.10E-59 | 0.293848967 | 0.429 | 0.331 |
| EEA1     | 1.67E-58 | 0.323860229 | 0.305 | 0.22  |
| TTC17    | 1.73E-58 | 0.301213495 | 0.472 | 0.378 |
| RAPGEF1  | 1.89E-58 | 0.290353139 | 0.689 | 0.596 |

|             |          |             |       |       |
|-------------|----------|-------------|-------|-------|
| ATAD2B      | 2.24E-58 | 0.301174658 | 0.413 | 0.319 |
| MAGT1       | 6.40E-58 | 0.340698424 | 0.368 | 0.285 |
| ESF1        | 8.10E-58 | 0.276315906 | 0.27  | 0.185 |
| GTF2I       | 1.36E-57 | 0.277039726 | 0.412 | 0.324 |
| CRCP        | 1.78E-57 | 0.252244678 | 0.313 | 0.223 |
| SOS2        | 1.91E-56 | 0.251724916 | 0.418 | 0.324 |
| INTS4       | 5.37E-56 | 0.251690781 | 0.259 | 0.173 |
| MAPK8       | 6.35E-56 | 0.393913973 | 0.458 | 0.378 |
| BMPR2       | 6.56E-56 | 0.399097135 | 0.333 | 0.249 |
| SNX5        | 2.23E-55 | 0.262428351 | 0.343 | 0.259 |
| THUMPD3-AS1 | 3.01E-55 | 0.290430608 | 0.406 | 0.317 |
| PLEKHO1     | 7.91E-55 | 0.25556746  | 0.332 | 0.242 |
| DCP1A       | 1.43E-54 | 0.254186491 | 0.409 | 0.318 |
| UBE3A       | 1.60E-54 | 0.282482392 | 0.464 | 0.379 |
| TLK2        | 3.20E-54 | 0.257533974 | 0.451 | 0.36  |
| TMF1        | 2.36E-52 | 0.273602303 | 0.505 | 0.419 |
| TAF3        | 2.56E-52 | 0.29270021  | 0.405 | 0.315 |
| WDR70       | 8.81E-52 | 0.287887564 | 0.425 | 0.34  |
| GTF2E2      | 1.11E-51 | 0.254952108 | 0.259 | 0.18  |
| PPP1CB1     | 1.45E-51 | 0.315559761 | 0.659 | 0.592 |
| PLCL2       | 1.84E-51 | 0.310354887 | 0.44  | 0.352 |
| THEMIS2     | 4.98E-51 | 0.274733496 | 0.253 | 0.179 |
| HMBOX1      | 2.55E-50 | 0.27550691  | 0.335 | 0.251 |
| ARL5A       | 4.59E-50 | 0.276173311 | 0.336 | 0.258 |
| CCDC107     | 8.36E-50 | 0.352888439 | 0.358 | 0.284 |
| NBDY        | 1.19E-49 | 0.285885899 | 0.436 | 0.357 |
| ADIPOR2     | 3.18E-49 | 0.26999254  | 0.377 | 0.293 |
| NFYC        | 4.21E-49 | 0.267097748 | 0.305 | 0.227 |
| MBD4        | 2.88E-48 | 0.308072836 | 0.29  | 0.216 |
| RREB1       | 2.91E-48 | 0.322613077 | 0.302 | 0.225 |
| FBXL17      | 3.17E-48 | 0.296358397 | 0.505 | 0.423 |
| UBE2E1      | 5.15E-48 | 0.251516623 | 0.356 | 0.273 |
| EIF2A       | 1.66E-47 | 0.251381135 | 0.423 | 0.346 |
| ARHGAP25    | 1.68E-47 | 0.295690741 | 0.409 | 0.325 |
| ZDHHC14     | 2.00E-47 | 0.27820216  | 0.269 | 0.189 |
| CEP57       | 2.53E-47 | 0.261169524 | 0.385 | 0.303 |
| ULK4        | 2.58E-47 | 0.288293103 | 0.286 | 0.207 |
| ABHD17B1    | 4.61E-47 | 0.289611888 | 0.362 | 0.279 |
| CERT1       | 8.70E-47 | 0.262077102 | 0.462 | 0.382 |
| SPOP        | 3.05E-46 | 0.26009127  | 0.356 | 0.277 |
| FOXJ3       | 3.69E-46 | 0.286900972 | 0.421 | 0.342 |
| CUL5        | 7.01E-46 | 0.257718753 | 0.426 | 0.345 |
| KLHL6       | 1.09E-45 | 0.355353154 | 0.336 | 0.264 |

|             |          |             |       |       |
|-------------|----------|-------------|-------|-------|
| NR2C2       | 1.27E-45 | 0.275234385 | 0.302 | 0.226 |
| PUM3        | 1.33E-45 | 0.259534896 | 0.294 | 0.217 |
| SPEN        | 1.35E-45 | 0.25359311  | 0.363 | 0.284 |
| FBXO34      | 2.03E-45 | 0.262552057 | 0.521 | 0.442 |
| RSRC1       | 3.03E-45 | 0.259470736 | 0.444 | 0.369 |
| PRKRIP1     | 4.61E-45 | 0.269908644 | 0.332 | 0.256 |
| KCMF1       | 1.66E-44 | 0.255140648 | 0.426 | 0.351 |
| KPNA1       | 2.28E-44 | 0.257329092 | 0.361 | 0.286 |
| PMM2        | 2.51E-44 | 0.260983399 | 0.327 | 0.25  |
| RNGTT       | 7.48E-44 | 0.256561245 | 0.476 | 0.4   |
| SDCCAG8     | 3.63E-43 | 0.282384927 | 0.314 | 0.242 |
| VTA1        | 5.94E-43 | 0.252969161 | 0.269 | 0.195 |
| VRK2        | 7.26E-43 | 0.301424299 | 0.327 | 0.255 |
| DCTN4       | 1.09E-42 | 0.260472165 | 0.402 | 0.327 |
| DIAPH2      | 1.41E-42 | 0.261789758 | 0.482 | 0.404 |
| AP3B1       | 1.78E-41 | 0.271313684 | 0.535 | 0.473 |
| C1GALT1     | 2.22E-41 | 0.253926669 | 0.301 | 0.227 |
| ANKRD37     | 5.37E-41 | 0.258501546 | 0.318 | 0.244 |
| FMNL1       | 5.38E-41 | 0.278061002 | 0.406 | 0.339 |
| CDC27       | 1.05E-40 | 0.261968058 | 0.337 | 0.267 |
| HIPK3       | 1.35E-40 | 0.262026334 | 0.379 | 0.309 |
| MYO9A       | 6.82E-40 | 0.274896646 | 0.279 | 0.208 |
| SMG1        | 8.58E-39 | 0.278633065 | 0.526 | 0.461 |
| SLC24A1     | 1.14E-37 | 0.253833557 | 0.274 | 0.202 |
| FBXO33      | 1.99E-37 | 0.257626711 | 0.449 | 0.376 |
| CDC37       | 8.94E-37 | 0.267278508 | 0.472 | 0.408 |
| SIAH2       | 1.20E-35 | 0.284030591 | 0.39  | 0.323 |
| LCORL       | 1.84E-35 | 0.298794549 | 0.32  | 0.258 |
| ZMYM4       | 1.90E-35 | 0.252147651 | 0.252 | 0.19  |
| VPS41       | 1.46E-34 | 0.250927939 | 0.278 | 0.216 |
| AFF1        | 4.83E-33 | 0.251096772 | 0.521 | 0.462 |
| CDK11B      | 7.38E-32 | 0.250546621 | 0.318 | 0.255 |
| ELP4        | 7.39E-30 | 0.304310431 | 0.262 | 0.205 |
| HIPK2       | 1.40E-28 | 0.558059924 | 0.425 | 0.384 |
| MYO1D       | 1.73E-24 | 0.270954751 | 0.259 | 0.207 |
| PBX3        | 1.98E-21 | 0.259375997 | 0.314 | 0.265 |
| WWOX        | 6.66E-20 | 0.306564828 | 0.391 | 0.347 |
| GLA         | 1.58E-17 | 0.267164597 | 0.251 | 0.211 |
| AL136456.11 | 0        | 2.738485617 | 0.739 | 0.145 |
| TNFRSF41    | 0        | 2.275770899 | 0.599 | 0.104 |
| IL2RA       | 0        | 2.149078815 | 0.645 | 0.142 |
| IKZF2       | 0        | 2.120405089 | 0.738 | 0.187 |
| IL12RB2     | 0        | 2.046512859 | 0.597 | 0.124 |

|            |   |             |       |       |
|------------|---|-------------|-------|-------|
| TNFRSF181  | 0 | 1.910084993 | 0.657 | 0.155 |
| PLCL11     | 0 | 1.893943532 | 0.734 | 0.2   |
| FAAH21     | 0 | 1.854206603 | 0.686 | 0.205 |
| CTLA41     | 0 | 1.835642643 | 0.845 | 0.225 |
| BATF1      | 0 | 1.825589858 | 0.864 | 0.319 |
| LINC02694  | 0 | 1.784056323 | 0.518 | 0.117 |
| RTKN2      | 0 | 1.733931173 | 0.53  | 0.072 |
| LINC02099  | 0 | 1.704968196 | 0.341 | 0.032 |
| ICOS1      | 0 | 1.675012446 | 0.88  | 0.298 |
| PHACTR21   | 0 | 1.668968988 | 0.862 | 0.389 |
| AC093865.1 | 0 | 1.638669632 | 0.486 | 0.076 |
| MAST4      | 0 | 1.622518713 | 0.675 | 0.236 |
| LDLRAD41   | 0 | 1.618566138 | 0.975 | 0.656 |
| TBC1D41    | 0 | 1.618484256 | 0.75  | 0.222 |
| STAM1      | 0 | 1.615839572 | 0.818 | 0.313 |
| IL322      | 0 | 1.571706087 | 0.878 | 0.463 |
| CRADD      | 0 | 1.537582924 | 0.574 | 0.216 |
| THADA1     | 0 | 1.534975786 | 0.741 | 0.388 |
| TNIK1      | 0 | 1.489917622 | 0.858 | 0.349 |
| DUSP161    | 0 | 1.464744007 | 0.892 | 0.436 |
| CADM1      | 0 | 1.43459513  | 0.354 | 0.125 |
| TIGIT2     | 0 | 1.421378758 | 0.78  | 0.257 |
| NIBAN12    | 0 | 1.392656784 | 0.923 | 0.527 |
| MAP3K51    | 0 | 1.390260984 | 0.826 | 0.413 |
| GCNT1      | 0 | 1.35843137  | 0.447 | 0.166 |
| LAIR2      | 0 | 1.338286238 | 0.483 | 0.087 |
| RORA1      | 0 | 1.327509981 | 0.883 | 0.38  |
| TSPAN52    | 0 | 1.319681912 | 0.737 | 0.29  |
| SKAP12     | 0 | 1.309275314 | 0.93  | 0.48  |
| CD2472     | 0 | 1.306982365 | 0.905 | 0.415 |
| ICA11      | 0 | 1.294209289 | 0.525 | 0.113 |
| GLCCI11    | 0 | 1.293240205 | 0.822 | 0.401 |
| EPSTI11    | 0 | 1.285699961 | 0.745 | 0.413 |
| FOXP3      | 0 | 1.272584632 | 0.475 | 0.049 |
| ZEB11      | 0 | 1.265135337 | 0.855 | 0.508 |
| ZC3H12D1   | 0 | 1.258586193 | 0.646 | 0.212 |
| CARD161    | 0 | 1.251053539 | 0.688 | 0.319 |
| HPGD       | 0 | 1.237117435 | 0.377 | 0.123 |
| DUSP41     | 0 | 1.211566615 | 0.744 | 0.339 |
| GPHN1      | 0 | 1.20683158  | 0.659 | 0.347 |
| MAGEH1     | 0 | 1.161355896 | 0.405 | 0.089 |
| TRAF31     | 0 | 1.15835805  | 0.84  | 0.563 |
| CD281      | 0 | 1.15425155  | 0.691 | 0.198 |



|             |   |             |       |       |
|-------------|---|-------------|-------|-------|
| LINC01943   | 0 | 1.148725498 | 0.446 | 0.095 |
| TNFRSF91    | 0 | 1.141345387 | 0.476 | 0.136 |
| SMYD31      | 0 | 1.135325803 | 0.833 | 0.516 |
| ZC2HC1A     | 0 | 1.114521414 | 0.351 | 0.087 |
| ITK1        | 0 | 1.108796255 | 0.864 | 0.4   |
| UGP21       | 0 | 1.101780409 | 0.716 | 0.353 |
| LAYN        | 0 | 1.101119892 | 0.405 | 0.071 |
| F5          | 0 | 1.100530643 | 0.396 | 0.053 |
| LY75        | 0 | 1.094443398 | 0.519 | 0.189 |
| CDK61       | 0 | 1.087188226 | 0.576 | 0.294 |
| PMAIP1      | 0 | 1.080792602 | 0.702 | 0.404 |
| MAF1        | 0 | 1.065347959 | 0.691 | 0.27  |
| TTC39C1     | 0 | 1.064800178 | 0.699 | 0.333 |
| SPOCK21     | 0 | 1.061706382 | 0.86  | 0.402 |
| PCBP31      | 0 | 1.055226357 | 0.427 | 0.141 |
| TSHZ21      | 0 | 1.042226787 | 0.483 | 0.217 |
| CASK1       | 0 | 1.04156775  | 0.831 | 0.456 |
| USP471      | 0 | 1.026457046 | 0.782 | 0.513 |
| FOXO11      | 0 | 1.025555862 | 0.91  | 0.592 |
| IL1R1       | 0 | 1.01917166  | 0.478 | 0.124 |
| ZNF8311     | 0 | 1.00910099  | 0.767 | 0.348 |
| GADD45A1    | 0 | 0.997876093 | 0.498 | 0.24  |
| PHTF21      | 0 | 0.99443205  | 0.689 | 0.355 |
| CD23        | 0 | 0.993103653 | 0.89  | 0.459 |
| MIR4435-2HG | 0 | 0.992340041 | 0.687 | 0.378 |
| LTB2        | 0 | 0.98667976  | 0.738 | 0.411 |
| HERC11      | 0 | 0.986043729 | 0.846 | 0.59  |
| FANK1       | 0 | 0.983466693 | 0.313 | 0.029 |
| ABCC11      | 0 | 0.97825488  | 0.758 | 0.434 |
| GPRIN32     | 0 | 0.974590946 | 0.731 | 0.39  |
| GBP5        | 0 | 0.97229813  | 0.552 | 0.216 |
| TOX2        | 0 | 0.956109315 | 0.443 | 0.108 |
| NCOA21      | 0 | 0.953092526 | 0.784 | 0.499 |
| FAM184A     | 0 | 0.950136016 | 0.353 | 0.088 |
| PTPRJ1      | 0 | 0.940784612 | 0.757 | 0.418 |
| S100A41     | 0 | 0.936730151 | 0.849 | 0.575 |
| NETO2       | 0 | 0.933815649 | 0.393 | 0.164 |
| PBXIP11     | 0 | 0.932302395 | 0.787 | 0.392 |
| FYN2        | 0 | 0.926765951 | 0.99  | 0.657 |
| CRY11       | 0 | 0.926733447 | 0.644 | 0.34  |
| SLAMF11     | 0 | 0.923303752 | 0.458 | 0.161 |
| IL6ST1      | 0 | 0.922472788 | 0.769 | 0.454 |
| HNRNPLL2    | 0 | 0.919103102 | 0.664 | 0.286 |

|            |   |             |       |       |
|------------|---|-------------|-------|-------|
| PBX41      | 0 | 0.918507114 | 0.725 | 0.32  |
| NOP581     | 0 | 0.917770951 | 0.867 | 0.593 |
| ARID5B1    | 0 | 0.910302965 | 0.956 | 0.728 |
| SAMHD11    | 0 | 0.908470881 | 0.661 | 0.335 |
| CEP120     | 0 | 0.903879113 | 0.502 | 0.211 |
| TRAC2      | 0 | 0.903204476 | 0.8   | 0.402 |
| TLK11      | 0 | 0.889433007 | 0.81  | 0.502 |
| CNST1      | 0 | 0.88863588  | 0.665 | 0.32  |
| GK         | 0 | 0.887902073 | 0.626 | 0.237 |
| IPCEF11    | 0 | 0.887847317 | 0.612 | 0.257 |
| RAPGEF61   | 0 | 0.887758391 | 0.829 | 0.567 |
| FAS1       | 0 | 0.887104129 | 0.554 | 0.191 |
| SPATS2L1   | 0 | 0.881194412 | 0.606 | 0.301 |
| ZNRF21     | 0 | 0.880515365 | 0.705 | 0.379 |
| SYNE22     | 0 | 0.879862932 | 0.909 | 0.557 |
| AC013652.1 | 0 | 0.871269462 | 0.304 | 0.09  |
| CAMK42     | 0 | 0.86704657  | 0.672 | 0.354 |
| PKIA       | 0 | 0.866531438 | 0.384 | 0.121 |
| HS3ST3B1   | 0 | 0.859966223 | 0.417 | 0.146 |
| RHBDD21    | 0 | 0.854770544 | 0.552 | 0.204 |
| CCR61      | 0 | 0.852032141 | 0.507 | 0.201 |
| MRPL11     | 0 | 0.850127335 | 0.684 | 0.401 |
| DOCK101    | 0 | 0.847723264 | 0.799 | 0.527 |
| ZNF292     | 0 | 0.845931426 | 0.795 | 0.517 |
| ZC3H12C    | 0 | 0.84558533  | 0.326 | 0.113 |
| TOX3       | 0 | 0.842212432 | 0.65  | 0.343 |
| PVT11      | 0 | 0.841428144 | 0.683 | 0.364 |
| CORO1B1    | 0 | 0.827160563 | 0.518 | 0.247 |
| ZBTB381    | 0 | 0.818883613 | 0.67  | 0.342 |
| DNPH11     | 0 | 0.817302591 | 0.521 | 0.225 |
| CD73       | 0 | 0.815245124 | 0.741 | 0.362 |
| ZC3H7A1    | 0 | 0.81427971  | 0.607 | 0.285 |
| VPS54      | 0 | 0.81338191  | 0.449 | 0.197 |
| KLHL2      | 0 | 0.811735279 | 0.5   | 0.228 |
| CYTOR1     | 0 | 0.810097883 | 0.766 | 0.441 |
| RASGRP12   | 0 | 0.806668711 | 0.597 | 0.264 |
| TAB2       | 0 | 0.801757607 | 0.671 | 0.409 |
| GBP21      | 0 | 0.795882319 | 0.697 | 0.372 |
| IL18R11    | 0 | 0.795726928 | 0.515 | 0.169 |
| APBB1IP1   | 0 | 0.79443627  | 0.832 | 0.553 |
| SNX91      | 0 | 0.794430947 | 0.948 | 0.687 |
| USP151     | 0 | 0.779173345 | 0.919 | 0.724 |
| GATA32     | 0 | 0.774812822 | 0.431 | 0.151 |

|             |   |             |       |       |
|-------------|---|-------------|-------|-------|
| USP48       | 0 | 0.772385716 | 0.623 | 0.351 |
| MFHAS11     | 0 | 0.771739461 | 0.457 | 0.194 |
| CAST        | 0 | 0.771582522 | 0.787 | 0.567 |
| NPC11       | 0 | 0.771207959 | 0.59  | 0.318 |
| ETS12       | 0 | 0.759768344 | 0.941 | 0.617 |
| RORA-AS11   | 0 | 0.759143696 | 0.516 | 0.192 |
| NDUFV21     | 0 | 0.757385016 | 0.767 | 0.527 |
| CD271       | 0 | 0.757353715 | 0.58  | 0.265 |
| CLEC2D2     | 0 | 0.754397551 | 0.797 | 0.506 |
| UHRF2       | 0 | 0.748370082 | 0.608 | 0.317 |
| JMY1        | 0 | 0.746461334 | 0.716 | 0.451 |
| TRBC22      | 0 | 0.742667527 | 0.758 | 0.456 |
| AC104850.2  | 0 | 0.741998691 | 0.253 | 0.028 |
| NAB11       | 0 | 0.738550961 | 0.498 | 0.215 |
| NCK21       | 0 | 0.737659112 | 0.725 | 0.399 |
| PAM1        | 0 | 0.730540598 | 0.623 | 0.342 |
| AAK12       | 0 | 0.729370044 | 0.758 | 0.436 |
| FYB11       | 0 | 0.729262858 | 0.854 | 0.514 |
| CNOT6L2     | 0 | 0.725321932 | 0.953 | 0.736 |
| MSI2        | 0 | 0.725305796 | 0.803 | 0.53  |
| MCF2L2      | 0 | 0.725033608 | 0.423 | 0.158 |
| SOD11       | 0 | 0.723268717 | 0.855 | 0.647 |
| BIRC32      | 0 | 0.721165033 | 0.792 | 0.516 |
| CD41        | 0 | 0.717243849 | 0.506 | 0.196 |
| AC017002.5  | 0 | 0.715937583 | 0.331 | 0.095 |
| PHLDA11     | 0 | 0.712369139 | 0.498 | 0.224 |
| CXCR61      | 0 | 0.711724557 | 0.389 | 0.118 |
| SETD7       | 0 | 0.708926895 | 0.342 | 0.125 |
| ASXL11      | 0 | 0.707442172 | 0.762 | 0.482 |
| JAK1        | 0 | 0.705774748 | 0.937 | 0.768 |
| IL21R1      | 0 | 0.704455207 | 0.496 | 0.232 |
| COX10-AS1   | 0 | 0.702700522 | 0.314 | 0.095 |
| BCL11B2     | 0 | 0.701974927 | 0.818 | 0.402 |
| CUL32       | 0 | 0.696297768 | 0.842 | 0.617 |
| ZNRF12      | 0 | 0.695963739 | 0.493 | 0.182 |
| EPC11       | 0 | 0.6944201   | 0.912 | 0.707 |
| NAP1L42     | 0 | 0.694077132 | 0.809 | 0.549 |
| PRKCH2      | 0 | 0.690306634 | 0.887 | 0.547 |
| TMEM1731    | 0 | 0.689507263 | 0.453 | 0.17  |
| AC010609.11 | 0 | 0.686690117 | 0.481 | 0.181 |
| IL2RB1      | 0 | 0.682790577 | 0.427 | 0.142 |
| PARD6G      | 0 | 0.68117411  | 0.302 | 0.082 |
| STK17B1     | 0 | 0.679839203 | 0.948 | 0.791 |

|            |           |             |       |       |
|------------|-----------|-------------|-------|-------|
| PAK21      | 0         | 0.677563403 | 0.808 | 0.576 |
| CDC14A2    | 0         | 0.673598647 | 0.671 | 0.377 |
| METTL81    | 0         | 0.666827302 | 0.416 | 0.176 |
| ARNTL1     | 0         | 0.664264936 | 0.494 | 0.207 |
| ZNF282     | 0         | 0.663237074 | 0.298 | 0.076 |
| COX10      | 0         | 0.659003739 | 0.342 | 0.126 |
| PELI1      | 0         | 0.658081382 | 0.785 | 0.491 |
| HTATIP2    | 0         | 0.65518766  | 0.393 | 0.144 |
| RCAN31     | 0         | 0.65200035  | 0.567 | 0.28  |
| STAT42     | 0         | 0.647165286 | 0.875 | 0.576 |
| LINC02195  | 0         | 0.644148372 | 0.25  | 0.05  |
| ADAT2      | 0         | 0.641345513 | 0.335 | 0.094 |
| IL7        | 0         | 0.634136054 | 0.255 | 0.076 |
| BICDL12    | 0         | 0.633061105 | 0.727 | 0.373 |
| IRS21      | 0         | 0.630779306 | 0.589 | 0.313 |
| TNFRSF25   | 0         | 0.617250955 | 0.366 | 0.091 |
| PTPRC2     | 0         | 0.610067938 | 0.992 | 0.872 |
| IL7R1      | 0         | 0.606488494 | 0.866 | 0.437 |
| AL121935.1 | 0         | 0.587711573 | 0.275 | 0.067 |
| LAPTM4B    | 0         | 0.581039257 | 0.255 | 0.05  |
| CHST7      | 0         | 0.579528341 | 0.252 | 0.069 |
| CD3D2      | 0         | 0.575718329 | 0.861 | 0.439 |
| LRRC37B    | 0         | 0.560233312 | 0.312 | 0.1   |
| OPRM1      | 0         | 0.55431597  | 0.311 | 0.104 |
| CCR4       | 0         | 0.552056721 | 0.303 | 0.075 |
| LCK2       | 0         | 0.537737003 | 0.608 | 0.296 |
| CUL9       | 0         | 0.524694757 | 0.255 | 0.064 |
| CD3E2      | 0         | 0.484375394 | 0.782 | 0.404 |
| SIRPG1     | 0         | 0.478416207 | 0.351 | 0.121 |
| P2RY101    | 7.43E-307 | 0.615902306 | 0.579 | 0.292 |
| PRDM11     | 4.56E-305 | 0.727506304 | 0.6   | 0.333 |
| STAT31     | 9.11E-303 | 0.585260747 | 0.853 | 0.63  |
| CSGALNACT2 | 5.58E-302 | 0.712405672 | 0.614 | 0.356 |
| ATXN12     | 2.95E-301 | 0.606321321 | 0.909 | 0.656 |
| LAX11      | 2.52E-299 | 0.664977991 | 0.419 | 0.179 |
| AL121933.2 | 1.23E-298 | 0.46575297  | 0.251 | 0.078 |
| MALT11     | 1.33E-298 | 0.895579473 | 0.771 | 0.533 |
| LAT3       | 1.77E-297 | 0.472356668 | 0.419 | 0.173 |
| GSPT11     | 1.57E-295 | 0.618769159 | 0.791 | 0.549 |
| PYHIN12    | 4.03E-295 | 0.637104384 | 0.538 | 0.255 |
| HLA-A2     | 2.51E-294 | 0.612306164 | 0.965 | 0.918 |
| CASP82     | 2.13E-293 | 0.706270155 | 0.686 | 0.423 |
| TANK       | 2.35E-293 | 0.840770193 | 0.801 | 0.584 |

|            |           |             |       |       |
|------------|-----------|-------------|-------|-------|
| CACYBP2    | 4.93E-293 | 0.733069962 | 0.742 | 0.5   |
| CCDC661    | 1.15E-290 | 0.622206359 | 0.492 | 0.239 |
| LMTK2      | 1.32E-290 | 0.639222619 | 0.379 | 0.157 |
| BTG31      | 2.27E-290 | 0.681511962 | 0.531 | 0.283 |
| TIAM11     | 4.79E-290 | 0.715330936 | 0.476 | 0.226 |
| LEF11      | 5.46E-290 | 0.601319455 | 0.297 | 0.102 |
| DDHD1      | 2.53E-289 | 0.735111639 | 0.57  | 0.314 |
| ANKRD121   | 2.96E-288 | 0.638512518 | 0.95  | 0.813 |
| STAT5B2    | 5.09E-287 | 0.59074815  | 0.673 | 0.384 |
| GLRX       | 5.04E-285 | 0.840774308 | 0.529 | 0.294 |
| PPM1G      | 5.12E-284 | 0.63758658  | 0.619 | 0.375 |
| IL2RG2     | 2.40E-283 | 0.676407647 | 0.687 | 0.444 |
| RAP1A1     | 8.97E-283 | 0.670725056 | 0.8   | 0.582 |
| RGS12      | 2.54E-280 | 0.665350192 | 0.846 | 0.601 |
| CCDC141    | 1.57E-279 | 0.66234289  | 0.321 | 0.12  |
| TRBC12     | 2.06E-278 | 0.920726437 | 0.532 | 0.276 |
| SH2D2A1    | 2.60E-278 | 0.46866463  | 0.408 | 0.17  |
| HERC51     | 1.61E-277 | 0.769572411 | 0.419 | 0.192 |
| PRKCQ2     | 1.59E-276 | 0.524228857 | 0.575 | 0.283 |
| SGPP2      | 2.09E-275 | 0.532733093 | 0.327 | 0.124 |
| NDFIP2     | 2.70E-273 | 0.445108304 | 0.275 | 0.093 |
| RDX        | 5.29E-272 | 0.661220988 | 0.475 | 0.245 |
| KAT2B1     | 7.12E-268 | 0.721437359 | 0.523 | 0.281 |
| MBNL12     | 9.99E-267 | 0.626955013 | 0.972 | 0.857 |
| TMEM2451   | 8.72E-266 | 0.646335957 | 0.47  | 0.231 |
| CD3G2      | 4.91E-265 | 0.340122957 | 0.725 | 0.373 |
| RYBP       | 2.03E-264 | 0.646666833 | 0.693 | 0.453 |
| ARID4B1    | 3.86E-264 | 0.534397313 | 0.928 | 0.766 |
| TNFRSF1B   | 7.62E-263 | 0.734727733 | 0.678 | 0.431 |
| 31-Mar     | 1.23E-261 | 0.645341584 | 0.541 | 0.286 |
| FOXN3      | 6.73E-260 | 0.649059979 | 0.888 | 0.707 |
| CABLES1    | 8.51E-259 | 0.676277593 | 0.256 | 0.09  |
| EIF3J      | 2.22E-257 | 0.707784383 | 0.662 | 0.442 |
| FRMD4B     | 5.45E-257 | 0.569339687 | 0.391 | 0.175 |
| ARHGEF12   | 1.64E-255 | 0.561116148 | 0.33  | 0.135 |
| OXNAD12    | 2.87E-255 | 0.495241302 | 0.685 | 0.399 |
| PPP1R16B2  | 4.43E-255 | 0.613523605 | 0.822 | 0.564 |
| RAB11FIP11 | 4.27E-254 | 0.623381494 | 0.72  | 0.471 |
| NCALD1     | 1.64E-253 | 0.717547145 | 0.432 | 0.202 |
| GPCPD11    | 3.06E-253 | 0.576943712 | 0.792 | 0.554 |
| MLLT32     | 5.19E-253 | 0.595611143 | 0.542 | 0.279 |
| LINC005131 | 7.77E-253 | 0.571334627 | 0.851 | 0.632 |
| CLIP1      | 4.29E-251 | 0.602501947 | 0.535 | 0.3   |

|             |           |             |       |       |
|-------------|-----------|-------------|-------|-------|
| RNF19A2     | 9.57E-249 | 0.597264423 | 0.842 | 0.606 |
| OPTN1       | 2.09E-248 | 0.501133756 | 0.557 | 0.302 |
| LRBA1       | 2.00E-247 | 0.569413604 | 0.861 | 0.639 |
| UXS1        | 1.14E-246 | 0.479869195 | 0.374 | 0.166 |
| BACH11      | 1.29E-246 | 0.661868608 | 0.765 | 0.53  |
| GNG21       | 3.64E-246 | 0.542508942 | 0.834 | 0.578 |
| LIMA1       | 4.14E-246 | 0.490428821 | 0.334 | 0.139 |
| FAM122C     | 4.46E-244 | 0.61320758  | 0.299 | 0.117 |
| CREM1       | 8.13E-243 | 0.577823645 | 0.924 | 0.767 |
| ATP13A3     | 1.31E-242 | 0.559802073 | 0.546 | 0.299 |
| DGKE        | 1.52E-242 | 0.696918685 | 0.287 | 0.113 |
| JAZF11      | 5.69E-240 | 0.730518918 | 0.708 | 0.471 |
| CDKN1B1     | 2.08E-239 | 0.560813869 | 0.601 | 0.359 |
| BCL22       | 5.09E-239 | 0.642849803 | 0.773 | 0.529 |
| CEP128      | 5.87E-238 | 0.74502425  | 0.447 | 0.228 |
| TTN1        | 1.02E-237 | 0.538643155 | 0.39  | 0.175 |
| VDR         | 1.36E-237 | 0.476762863 | 0.305 | 0.124 |
| CCNG2       | 2.86E-237 | 0.55884506  | 0.295 | 0.119 |
| PGAP11      | 3.48E-236 | 0.864811336 | 0.404 | 0.19  |
| AF165147.11 | 2.09E-235 | 0.564362371 | 0.329 | 0.135 |
| G3BP21      | 1.43E-234 | 0.644841915 | 0.733 | 0.524 |
| ADAM101     | 2.22E-234 | 0.669960748 | 0.585 | 0.358 |
| CD51        | 5.15E-234 | 0.378298724 | 0.311 | 0.121 |
| SH2D1A1     | 6.46E-234 | 0.422266765 | 0.378 | 0.161 |
| MAP3K11     | 1.15E-233 | 0.619718972 | 0.585 | 0.347 |
| AHR1        | 2.97E-231 | 0.645333815 | 0.611 | 0.365 |
| SLA3        | 5.78E-231 | 0.406285242 | 0.771 | 0.487 |
| LINC015781  | 1.68E-228 | 0.516003693 | 0.834 | 0.637 |
| SLC16A11    | 1.25E-227 | 0.634245642 | 0.431 | 0.217 |
| MICAL2      | 1.04E-226 | 0.47978776  | 0.313 | 0.131 |
| CTSC        | 1.72E-225 | 0.632344619 | 0.636 | 0.402 |
| YIPF6       | 7.65E-225 | 0.490929018 | 0.341 | 0.154 |
| ACOT9       | 1.35E-224 | 0.543773979 | 0.424 | 0.219 |
| CSNK1G31    | 1.79E-223 | 0.605539269 | 0.535 | 0.304 |
| PTPN221     | 4.32E-222 | 0.537877127 | 0.785 | 0.534 |
| TNFAIP32    | 4.45E-221 | 0.408659964 | 0.932 | 0.688 |
| TNRC6A1     | 4.99E-221 | 0.558904352 | 0.645 | 0.414 |
| TUT7        | 1.92E-219 | 0.649209228 | 0.623 | 0.403 |
| ITM2A2      | 4.71E-218 | 0.432345691 | 0.585 | 0.316 |
| CDC42SE21   | 8.99E-218 | 0.463771411 | 0.954 | 0.787 |
| AC009313.1  | 2.70E-217 | 0.577908497 | 0.352 | 0.161 |
| SH3KBP1     | 8.05E-217 | 0.500611905 | 0.837 | 0.637 |
| NR3C11      | 1.32E-215 | 0.712081233 | 0.838 | 0.666 |

|             |           |             |       |       |
|-------------|-----------|-------------|-------|-------|
| TRIM59      | 2.92E-214 | 0.445803108 | 0.319 | 0.136 |
| STK241      | 1.15E-213 | 0.598068498 | 0.687 | 0.464 |
| PTTG1       | 1.67E-213 | 0.422702365 | 0.332 | 0.145 |
| CCND21      | 2.09E-212 | 0.624651908 | 0.538 | 0.315 |
| MBOAT1      | 2.59E-212 | 0.403094657 | 0.266 | 0.102 |
| CALM3       | 6.43E-212 | 0.513616634 | 0.59  | 0.372 |
| CFAP20      | 3.80E-211 | 0.494449739 | 0.355 | 0.164 |
| CD58        | 3.99E-211 | 0.494980952 | 0.609 | 0.364 |
| IFNAR21     | 7.81E-211 | 0.534316093 | 0.512 | 0.298 |
| ARL6IP52    | 1.96E-210 | 0.542168937 | 0.778 | 0.58  |
| LINC00649   | 1.96E-210 | 0.434222372 | 0.319 | 0.136 |
| CBLB1       | 4.51E-210 | 0.509948983 | 0.87  | 0.64  |
| LEPROTL12   | 5.84E-210 | 0.431026269 | 0.837 | 0.588 |
| SGMS11      | 3.79E-209 | 0.684376432 | 0.616 | 0.395 |
| FLNB        | 5.14E-209 | 0.48926981  | 0.263 | 0.104 |
| VAV31       | 2.31E-207 | 0.939960889 | 0.617 | 0.421 |
| TRPS11      | 2.32E-207 | 0.593445051 | 0.688 | 0.454 |
| EIF4E3      | 2.79E-207 | 0.318989238 | 0.277 | 0.109 |
| MDFIC       | 5.08E-207 | 0.658736581 | 0.55  | 0.337 |
| AC016831.71 | 5.28E-207 | 0.535083969 | 0.758 | 0.531 |
| YWHAB1      | 9.28E-207 | 0.487900172 | 0.845 | 0.693 |
| UBE2B1      | 1.25E-206 | 0.479468723 | 0.838 | 0.673 |
| TOR1AIP2    | 3.62E-206 | 0.553587884 | 0.42  | 0.223 |
| THEM4       | 4.03E-206 | 0.380128385 | 0.305 | 0.128 |
| LUZP1       | 3.36E-205 | 0.546188056 | 0.455 | 0.245 |
| HIBCH1      | 3.51E-205 | 0.763632895 | 0.498 | 0.287 |
| SLAIN2      | 3.44E-204 | 0.602481159 | 0.488 | 0.281 |
| PRDM21      | 6.05E-203 | 0.428121985 | 0.837 | 0.626 |
| ADK1        | 2.42E-202 | 0.559571703 | 0.786 | 0.58  |
| PIM21       | 2.82E-202 | 0.487591864 | 0.421 | 0.219 |
| STIMATE     | 1.86E-201 | 0.428871679 | 0.303 | 0.132 |
| SEPTIN61    | 4.83E-201 | 0.505297959 | 0.8   | 0.603 |
| SARAF1      | 1.88E-200 | 0.384138542 | 0.968 | 0.846 |
| PDE3B2      | 1.02E-197 | 0.49005342  | 0.817 | 0.557 |
| AC073167.1  | 1.62E-195 | 0.47248557  | 0.316 | 0.14  |
| FTX         | 7.89E-195 | 0.547067747 | 0.709 | 0.504 |
| PRMT3       | 5.26E-194 | 0.504478012 | 0.274 | 0.115 |
| ZDBF2       | 7.18E-194 | 0.537034631 | 0.311 | 0.138 |
| PPP1R21     | 9.22E-194 | 0.518236651 | 0.787 | 0.594 |
| PAIP2       | 3.05E-193 | 0.508997539 | 0.706 | 0.513 |
| UBR5        | 8.06E-193 | 0.594852675 | 0.642 | 0.438 |
| GALM2       | 2.75E-192 | 0.416856396 | 0.647 | 0.402 |
| SELL1       | 3.41E-192 | 0.40623058  | 0.485 | 0.259 |

|            |           |             |       |       |
|------------|-----------|-------------|-------|-------|
| RNF2131    | 1.86E-189 | 0.478430826 | 0.792 | 0.603 |
| RBPJ1      | 3.91E-189 | 0.492195133 | 0.691 | 0.48  |
| ZNF281     | 1.30E-188 | 0.407490733 | 0.287 | 0.126 |
| UBE2K1     | 1.34E-188 | 0.673587465 | 0.679 | 0.49  |
| AL133480.1 | 7.20E-188 | 0.376193155 | 0.25  | 0.099 |
| WAKMAR21   | 8.70E-187 | 0.497708227 | 0.433 | 0.229 |
| TSPAN141   | 1.68E-186 | 0.439574218 | 0.493 | 0.281 |
| RANBP91    | 1.77E-186 | 0.555532565 | 0.576 | 0.365 |
| LINC016191 | 4.41E-185 | 0.499530094 | 0.859 | 0.646 |
| HIVEP3     | 8.76E-185 | 0.487501347 | 0.357 | 0.174 |
| PRDX21     | 9.84E-185 | 0.425397155 | 0.544 | 0.337 |
| PICALM     | 1.31E-183 | 0.506782013 | 0.763 | 0.565 |
| FOXP12     | 1.06E-182 | 0.638755421 | 0.879 | 0.725 |
| CMSS12     | 6.56E-182 | 0.722081862 | 0.646 | 0.436 |
| NDFIP11    | 5.66E-180 | 0.372975575 | 0.729 | 0.505 |
| TULP4      | 5.74E-180 | 0.459929704 | 0.466 | 0.266 |
| DUSP101    | 1.32E-179 | 0.480299378 | 0.467 | 0.264 |
| STAMBPL1   | 2.80E-179 | 0.411989949 | 0.309 | 0.14  |
| NEK7       | 4.48E-179 | 0.560159748 | 0.703 | 0.498 |
| CCM21      | 5.66E-179 | 0.670293183 | 0.498 | 0.304 |
| GRSF1      | 3.25E-178 | 0.418601463 | 0.349 | 0.174 |
| DDX242     | 3.99E-178 | 0.397700098 | 0.861 | 0.694 |
| ODF2L1     | 4.26E-178 | 0.424102486 | 0.526 | 0.301 |
| SAMSN11    | 1.56E-177 | 0.286715599 | 0.909 | 0.716 |
| SMAP21     | 5.22E-177 | 0.366868205 | 0.957 | 0.837 |
| FYCO1      | 9.71E-177 | 0.339308169 | 0.254 | 0.104 |
| ARHGEF6    | 1.21E-176 | 0.403408748 | 0.377 | 0.194 |
| BTBD111    | 1.66E-175 | 0.469742505 | 0.308 | 0.139 |
| ZC3HAV11   | 2.70E-175 | 0.482452765 | 0.857 | 0.668 |
| CDV31      | 4.47E-175 | 0.466108439 | 0.759 | 0.582 |
| B2M2       | 7.46E-175 | 0.349452998 | 0.99  | 0.977 |
| PCED1B1    | 2.69E-174 | 0.460853107 | 0.541 | 0.32  |
| RAB9A      | 7.89E-174 | 0.538831587 | 0.393 | 0.214 |
| WHRN1      | 9.33E-174 | 0.551868493 | 0.361 | 0.185 |
| LRIG1      | 1.18E-173 | 0.43514025  | 0.307 | 0.14  |
| SCAND1     | 5.72E-172 | 0.503800001 | 0.604 | 0.411 |
| SAMD12     | 1.28E-171 | 0.680668909 | 0.334 | 0.164 |
| BABAM2     | 5.81E-170 | 0.516232326 | 0.632 | 0.423 |
| SESN32     | 6.72E-170 | 0.688663721 | 0.57  | 0.356 |
| INPP4B2    | 8.83E-170 | 0.53690638  | 0.552 | 0.321 |
| C16orf87   | 9.33E-170 | 0.426238826 | 0.296 | 0.138 |
| LRRC8C2    | 5.26E-169 | 0.517667577 | 0.549 | 0.339 |
| PLIN21     | 3.65E-168 | 0.741166933 | 0.557 | 0.357 |



|             |           |             |       |       |
|-------------|-----------|-------------|-------|-------|
| AC104365.11 | 1.18E-167 | 0.567268529 | 0.396 | 0.215 |
| HIVEP1      | 1.23E-167 | 0.488861621 | 0.599 | 0.39  |
| PARK71      | 2.00E-167 | 0.46647907  | 0.726 | 0.554 |
| GBP4        | 4.95E-167 | 0.407907063 | 0.334 | 0.164 |
| RNF145      | 1.00E-166 | 0.468640864 | 0.55  | 0.347 |
| KIF5B       | 1.11E-166 | 0.441895221 | 0.666 | 0.467 |
| JAK31       | 2.89E-166 | 0.35967631  | 0.448 | 0.246 |
| PGM2L1      | 2.54E-165 | 0.682965546 | 0.26  | 0.116 |
| PHF21A      | 3.66E-165 | 0.551285281 | 0.49  | 0.296 |
| NSD31       | 7.36E-165 | 0.446930037 | 0.795 | 0.599 |
| MRFAP11     | 2.08E-162 | 0.435509726 | 0.616 | 0.425 |
| TNIP2       | 3.04E-162 | 0.394409925 | 0.369 | 0.195 |
| GLUD11      | 5.60E-162 | 0.568199788 | 0.593 | 0.395 |
| LINC-PINT2  | 1.02E-161 | 0.407039645 | 0.829 | 0.644 |
| TENT5C      | 1.53E-161 | 0.390511006 | 0.695 | 0.462 |
| MORC31      | 1.10E-160 | 0.46907166  | 0.518 | 0.322 |
| GRAMD1B2    | 1.24E-160 | 0.469182168 | 0.426 | 0.233 |
| BARD1       | 3.17E-160 | 0.476761049 | 0.266 | 0.12  |
| INPP5F1     | 3.44E-160 | 0.544081787 | 0.365 | 0.19  |
| PIK3IP11    | 1.52E-159 | 0.383865193 | 0.712 | 0.47  |
| WWP11       | 3.31E-159 | 0.403764815 | 0.426 | 0.236 |
| CENPC1      | 3.84E-158 | 0.481257309 | 0.627 | 0.43  |
| ERI1        | 3.97E-158 | 0.436412495 | 0.252 | 0.112 |
| SGTB        | 6.41E-158 | 0.350848695 | 0.294 | 0.14  |
| CDKAL1      | 4.94E-157 | 0.479862152 | 0.738 | 0.552 |
| SDF4        | 1.01E-156 | 0.416816399 | 0.461 | 0.281 |
| RFX71       | 1.74E-156 | 0.509289875 | 0.459 | 0.269 |
| YPEL2       | 2.06E-156 | 0.42341877  | 0.325 | 0.162 |
| ATP2B42     | 2.15E-156 | 0.421459251 | 0.502 | 0.294 |
| CTNNAL1     | 5.64E-153 | 0.489215316 | 0.287 | 0.137 |
| FAM53B      | 2.79E-152 | 0.408808146 | 0.438 | 0.252 |
| GOLGA8B     | 3.10E-152 | 0.374496384 | 0.346 | 0.176 |
| RANGAP1     | 6.19E-152 | 0.360188401 | 0.339 | 0.174 |
| SETD1B      | 1.02E-151 | 0.367531811 | 0.254 | 0.113 |
| IKZF12      | 1.75E-151 | 0.35762484  | 0.808 | 0.596 |
| TIFA        | 3.83E-151 | 0.484876799 | 0.315 | 0.158 |
| HPRT1       | 4.20E-151 | 0.438261217 | 0.349 | 0.188 |
| DLGAP1-AS1  | 4.83E-151 | 0.307080636 | 0.274 | 0.126 |
| PDCD42      | 7.16E-151 | 0.399976738 | 0.796 | 0.605 |
| CPEB3       | 1.09E-150 | 0.568108656 | 0.339 | 0.18  |
| MYO5A       | 4.74E-150 | 0.498732912 | 0.562 | 0.37  |
| COMMD3      | 1.30E-149 | 0.373097213 | 0.367 | 0.202 |
| SATB11      | 1.10E-148 | 0.430443542 | 0.392 | 0.217 |

|             |           |             |       |       |
|-------------|-----------|-------------|-------|-------|
| CYTIP1      | 2.39E-148 | 0.357718052 | 0.894 | 0.743 |
| GOLGA8A     | 8.81E-148 | 0.334709631 | 0.307 | 0.149 |
| GABPB1      | 2.00E-147 | 0.441666731 | 0.501 | 0.309 |
| PDCL31      | 2.10E-147 | 0.345897873 | 0.448 | 0.259 |
| L3MBTL3     | 5.07E-146 | 0.387050655 | 0.273 | 0.128 |
| ARHGDIB1    | 5.41E-145 | 0.361968043 | 0.913 | 0.787 |
| LRRFIP2     | 8.34E-145 | 0.494355839 | 0.46  | 0.286 |
| AKIRIN2     | 2.39E-144 | 0.469479148 | 0.549 | 0.367 |
| KDM5B       | 2.41E-143 | 0.370441722 | 0.405 | 0.228 |
| SLC25A261   | 2.66E-143 | 0.39512287  | 0.583 | 0.375 |
| SYTL32      | 7.29E-143 | 0.268829403 | 0.872 | 0.637 |
| TESPA11     | 1.56E-142 | 0.340580135 | 0.306 | 0.147 |
| ATXN7L11    | 3.18E-142 | 0.470252048 | 0.367 | 0.201 |
| LBH2        | 9.79E-142 | 0.338491504 | 0.565 | 0.348 |
| HBS1L1      | 2.44E-141 | 0.405978296 | 0.469 | 0.283 |
| CCDC88C1    | 1.87E-140 | 0.392880798 | 0.602 | 0.394 |
| TAX1BP11    | 2.93E-140 | 0.35416683  | 0.753 | 0.574 |
| IQGAP11     | 3.16E-140 | 0.382452219 | 0.848 | 0.689 |
| KIAA11091   | 3.33E-140 | 0.449910388 | 0.529 | 0.341 |
| REEP31      | 3.80E-140 | 0.453038255 | 0.379 | 0.217 |
| MRPS6       | 4.47E-140 | 0.388641948 | 0.549 | 0.362 |
| CMTM72      | 7.08E-140 | 0.483215161 | 0.564 | 0.377 |
| APOL61      | 2.93E-138 | 0.381997768 | 0.44  | 0.261 |
| CCSER22     | 1.64E-137 | 0.349840434 | 0.741 | 0.527 |
| TMEM263     | 2.48E-137 | 0.415683126 | 0.371 | 0.209 |
| CAB391      | 2.95E-137 | 0.480326258 | 0.561 | 0.382 |
| FAM160B11   | 6.55E-137 | 0.338104189 | 0.351 | 0.185 |
| WIPF11      | 2.03E-136 | 0.3815838   | 0.783 | 0.612 |
| CCDC167     | 4.32E-136 | 0.316990349 | 0.351 | 0.19  |
| RSBN11      | 4.35E-136 | 0.379970874 | 0.53  | 0.336 |
| GLB1        | 8.04E-136 | 0.425085954 | 0.338 | 0.187 |
| RGS101      | 4.05E-134 | 0.317281258 | 0.596 | 0.391 |
| CERK1       | 5.26E-134 | 0.347357518 | 0.372 | 0.207 |
| AL035634.11 | 5.36E-134 | 0.298601573 | 0.263 | 0.124 |
| 7-Mar       | 1.11E-133 | 0.387889048 | 0.645 | 0.467 |
| EED         | 1.18E-133 | 0.382308995 | 0.34  | 0.184 |
| ZBTB1       | 2.20E-133 | 0.412727733 | 0.733 | 0.543 |
| CFLAR       | 2.81E-133 | 0.32355362  | 0.792 | 0.598 |
| SOX4        | 9.05E-133 | 0.73765794  | 0.275 | 0.14  |
| SEC14L1     | 1.53E-132 | 0.425299007 | 0.54  | 0.372 |
| AC058791.11 | 3.44E-132 | 0.344991567 | 0.493 | 0.302 |
| SMC41       | 4.43E-132 | 0.356376601 | 0.436 | 0.26  |
| TCF12       | 4.48E-132 | 0.488402051 | 0.689 | 0.517 |

|             |           |             |       |       |
|-------------|-----------|-------------|-------|-------|
| FGD32       | 2.05E-131 | 0.335803725 | 0.43  | 0.249 |
| KAT6B1      | 6.36E-131 | 0.428473951 | 0.656 | 0.469 |
| REXO2       | 7.38E-129 | 0.328074322 | 0.349 | 0.195 |
| PHLPP1      | 1.93E-128 | 0.502102288 | 0.372 | 0.214 |
| IL10RA      | 2.20E-128 | 0.401993563 | 0.522 | 0.347 |
| IFI161      | 2.68E-128 | 0.344012662 | 0.796 | 0.621 |
| TRAK2       | 3.44E-128 | 0.396769185 | 0.313 | 0.166 |
| FAM107B1    | 4.15E-127 | 0.348989943 | 0.88  | 0.736 |
| SRGN1       | 1.13E-126 | 0.296286154 | 0.973 | 0.878 |
| C9orf16     | 1.92E-126 | 0.369679142 | 0.634 | 0.468 |
| SLFN52      | 5.90E-126 | 0.322047519 | 0.487 | 0.296 |
| TCF20       | 6.26E-126 | 0.357820017 | 0.34  | 0.186 |
| WNK11       | 9.06E-126 | 0.355185152 | 0.77  | 0.596 |
| CHIC22      | 2.18E-125 | 0.36089885  | 0.577 | 0.389 |
| MIB1        | 4.04E-125 | 0.401521744 | 0.321 | 0.173 |
| OGDH1       | 4.53E-125 | 0.412343032 | 0.61  | 0.425 |
| TG1         | 7.99E-125 | 0.277892387 | 0.357 | 0.191 |
| KSR1        | 1.29E-124 | 0.365010499 | 0.31  | 0.165 |
| AC093010.2  | 6.46E-124 | 0.369998122 | 0.295 | 0.149 |
| CLK1        | 7.71E-124 | 0.394724116 | 0.783 | 0.623 |
| AP000787.12 | 1.98E-123 | 0.473132784 | 0.414 | 0.241 |
| ZMYM21      | 2.38E-123 | 0.500896572 | 0.613 | 0.444 |
| MBD2        | 4.38E-123 | 0.366523636 | 0.605 | 0.438 |
| FAM13A      | 5.11E-123 | 0.509365667 | 0.31  | 0.169 |
| SLC12A61    | 7.11E-123 | 0.406539315 | 0.397 | 0.237 |
| STK42       | 1.75E-122 | 0.392737411 | 0.906 | 0.772 |
| AC114760.2  | 2.10E-122 | 0.293299458 | 0.268 | 0.131 |
| NLRC51      | 2.78E-122 | 0.315833317 | 0.465 | 0.283 |
| BCAS3       | 1.51E-121 | 0.483089712 | 0.582 | 0.408 |
| ACTN41      | 4.40E-121 | 0.341722668 | 0.547 | 0.371 |
| FURIN       | 5.87E-121 | 0.351201706 | 0.264 | 0.134 |
| MSL2        | 9.86E-121 | 0.38771364  | 0.499 | 0.322 |
| CHD31       | 5.55E-120 | 0.281206407 | 0.37  | 0.21  |
| ITPKB1      | 5.94E-120 | 0.427716535 | 0.486 | 0.308 |
| ARPC1B      | 6.01E-120 | 0.355531626 | 0.776 | 0.615 |
| STX16       | 1.21E-119 | 0.322189291 | 0.413 | 0.25  |
| TNIP31      | 2.42E-119 | 0.384026665 | 0.323 | 0.171 |
| HDAC7       | 2.76E-119 | 0.308595706 | 0.264 | 0.133 |
| NCOA11      | 2.92E-119 | 0.378166434 | 0.686 | 0.503 |
| WDR7        | 4.94E-119 | 0.394541797 | 0.456 | 0.288 |
| MINDY2      | 5.09E-119 | 0.347788225 | 0.289 | 0.151 |
| ASH1L       | 5.58E-119 | 0.398714027 | 0.767 | 0.598 |
| CREB3L2     | 6.82E-119 | 0.332036478 | 0.336 | 0.191 |

|          |           |             |       |       |
|----------|-----------|-------------|-------|-------|
| PPP4R2   | 1.05E-118 | 0.347168985 | 0.545 | 0.374 |
| SLC5A3   | 2.51E-118 | 0.31979985  | 0.346 | 0.195 |
| PSME41   | 2.85E-118 | 0.423850614 | 0.6   | 0.429 |
| FARS2    | 5.94E-118 | 0.377025852 | 0.481 | 0.307 |
| TSPYL22  | 7.33E-118 | 0.448980433 | 0.654 | 0.474 |
| STAT1    | 9.61E-118 | 0.425639324 | 0.545 | 0.369 |
| ATRX     | 3.11E-117 | 0.345336914 | 0.751 | 0.587 |
| SAMD91   | 4.44E-117 | 0.353512194 | 0.444 | 0.273 |
| DIAPH11  | 4.54E-117 | 0.360547501 | 0.594 | 0.413 |
| IQGAP21  | 5.59E-117 | 0.489189829 | 0.801 | 0.632 |
| PTPRA1   | 1.20E-116 | 0.362663241 | 0.561 | 0.384 |
| ITGB11   | 1.28E-115 | 0.28620742  | 0.634 | 0.445 |
| NT5C3A   | 2.27E-115 | 0.397513784 | 0.544 | 0.37  |
| TMEM50A1 | 2.34E-114 | 0.306821359 | 0.641 | 0.469 |
| OGT1     | 3.45E-114 | 0.398905765 | 0.596 | 0.424 |
| NF1      | 3.45E-114 | 0.390671498 | 0.574 | 0.4   |
| DGKH1    | 3.96E-114 | 0.348608058 | 0.319 | 0.174 |
| TMOD3    | 4.62E-114 | 0.393219486 | 0.58  | 0.412 |
| OCIAD21  | 4.89E-114 | 0.25012775  | 0.522 | 0.331 |
| TRAF1    | 3.52E-113 | 0.255440475 | 0.403 | 0.235 |
| NFAT5    | 1.19E-112 | 0.387499281 | 0.713 | 0.532 |
| ARPP19   | 3.69E-112 | 0.327559534 | 0.546 | 0.38  |
| IGFLR1   | 1.40E-111 | 0.395700604 | 0.395 | 0.249 |
| ZFAND5   | 2.40E-111 | 0.34316427  | 0.652 | 0.474 |
| FXYD51   | 3.06E-111 | 0.268581056 | 0.749 | 0.576 |
| EVL2     | 1.00E-110 | 0.307681273 | 0.712 | 0.508 |
| SEC11C   | 1.58E-110 | 0.2865254   | 0.5   | 0.326 |
| PPP2CA   | 1.60E-110 | 0.361742849 | 0.624 | 0.458 |
| FAM118A1 | 3.44E-110 | 0.303726755 | 0.393 | 0.232 |
| NSF1     | 6.73E-110 | 0.368534028 | 0.382 | 0.234 |
| SAT1     | 1.97E-109 | 0.298341248 | 0.893 | 0.77  |
| STK392   | 2.93E-109 | 0.326715886 | 0.368 | 0.212 |
| FILIP1L2 | 3.48E-109 | 0.544422434 | 0.492 | 0.331 |
| SAR1B    | 6.04E-109 | 0.324350946 | 0.423 | 0.271 |
| TACC3    | 2.01E-108 | 0.260785635 | 0.286 | 0.152 |
| HBP11    | 4.32E-108 | 0.325298407 | 0.559 | 0.389 |
| MTMR61   | 6.14E-108 | 0.393307556 | 0.452 | 0.296 |
| TMEM1541 | 1.25E-107 | 0.27802335  | 0.359 | 0.206 |
| MXD41    | 1.47E-107 | 0.323700224 | 0.468 | 0.308 |
| TBL1XR11 | 1.61E-107 | 0.328173586 | 0.624 | 0.45  |
| TDRD3    | 4.70E-107 | 0.367704105 | 0.295 | 0.162 |
| CD962    | 4.72E-107 | 0.302643647 | 0.696 | 0.461 |
| GMFG1    | 5.57E-107 | 0.29659834  | 0.766 | 0.619 |

|             |           |             |       |       |
|-------------|-----------|-------------|-------|-------|
| PPP3CC1     | 1.87E-106 | 0.346203609 | 0.535 | 0.367 |
| CYTH3       | 1.91E-106 | 0.508553181 | 0.291 | 0.16  |
| UBE2D2      | 2.22E-106 | 0.294630812 | 0.753 | 0.607 |
| VPS13C      | 3.69E-106 | 0.351937449 | 0.673 | 0.507 |
| EVI2A1      | 1.12E-105 | 0.36157916  | 0.537 | 0.371 |
| TPR         | 2.54E-105 | 0.339202192 | 0.634 | 0.467 |
| CASP1       | 2.59E-105 | 0.288654552 | 0.328 | 0.189 |
| DOK21       | 3.26E-105 | 0.276695664 | 0.415 | 0.254 |
| CCDC911     | 4.10E-105 | 0.355005983 | 0.732 | 0.563 |
| CCDC61      | 1.06E-104 | 0.434485723 | 0.505 | 0.35  |
| RICTOR      | 2.15E-104 | 0.379537933 | 0.582 | 0.417 |
| BICRAL1     | 2.32E-104 | 0.352773646 | 0.542 | 0.367 |
| SLC9A91     | 4.75E-104 | 0.463138014 | 0.462 | 0.302 |
| SMAP1       | 5.96E-103 | 0.302960411 | 0.549 | 0.381 |
| ARL15       | 1.90E-102 | 0.395321559 | 0.65  | 0.479 |
| CDC37L1     | 2.88E-102 | 0.271369421 | 0.309 | 0.172 |
| HLA-F1      | 2.91E-102 | 0.30918887  | 0.712 | 0.55  |
| PMVK        | 3.81E-102 | 0.308440222 | 0.353 | 0.212 |
| LINC019342  | 4.06E-102 | 0.555587516 | 0.401 | 0.248 |
| FTO         | 4.22E-102 | 0.377128726 | 0.457 | 0.3   |
| CREBRF      | 4.63E-102 | 0.310144536 | 0.588 | 0.422 |
| AL137856.11 | 5.11E-102 | 0.268617681 | 0.374 | 0.216 |
| PSMD14      | 7.29E-102 | 0.368405766 | 0.509 | 0.356 |
| SYNJ2       | 6.11E-101 | 0.332070912 | 0.335 | 0.195 |
| ITGAL1      | 6.48E-101 | 0.279007385 | 0.38  | 0.225 |
| TMPO        | 8.48E-101 | 0.316653094 | 0.482 | 0.32  |
| MAT2B       | 1.15E-100 | 0.269818062 | 0.33  | 0.192 |
| RAP1GDS1    | 1.30E-100 | 0.50420847  | 0.518 | 0.364 |
| XRN11       | 2.04E-100 | 0.348872084 | 0.644 | 0.481 |
| OTULIN1     | 2.04E-100 | 0.329435012 | 0.472 | 0.313 |
| NDUFB8      | 3.29E-100 | 0.288101798 | 0.658 | 0.507 |
| HELB1       | 7.90E-100 | 0.318524167 | 0.311 | 0.175 |
| ALDH9A1     | 9.73E-100 | 0.264380421 | 0.279 | 0.153 |
| GALNT10     | 4.08E-99  | 0.297872295 | 0.408 | 0.25  |
| KDM6A       | 4.47E-99  | 0.363604196 | 0.676 | 0.521 |
| TMX3        | 7.62E-99  | 0.307934276 | 0.328 | 0.193 |
| ITGA41      | 8.13E-99  | 0.507938649 | 0.592 | 0.458 |
| MFSD61      | 8.85E-99  | 0.283901963 | 0.363 | 0.213 |
| CAMK2D1     | 6.25E-98  | 0.39563472  | 0.616 | 0.448 |
| FNBP1       | 4.55E-97  | 0.284217804 | 0.908 | 0.778 |
| NUDT5       | 6.10E-97  | 0.250898478 | 0.362 | 0.22  |
| EMB2        | 1.34E-96  | 0.329238221 | 0.673 | 0.499 |
| EXT1        | 1.89E-96  | 0.340769459 | 0.511 | 0.349 |

|             |          |             |       |       |
|-------------|----------|-------------|-------|-------|
| PCED1B-AS12 | 1.92E-96 | 0.280475759 | 0.615 | 0.442 |
| CDR2        | 2.33E-96 | 0.324868654 | 0.465 | 0.309 |
| CEMIP22     | 4.25E-96 | 0.29452013  | 0.835 | 0.655 |
| AC016831.51 | 1.74E-95 | 0.312284895 | 0.437 | 0.285 |
| C17orf49    | 1.75E-95 | 0.296369102 | 0.435 | 0.287 |
| CHD21       | 1.84E-95 | 0.368786567 | 0.864 | 0.733 |
| CRTC31      | 1.92E-95 | 0.310691376 | 0.418 | 0.267 |
| MIER11      | 3.39E-95 | 0.288644605 | 0.632 | 0.47  |
| RBM33       | 4.03E-95 | 0.285644518 | 0.604 | 0.442 |
| ESR21       | 5.10E-95 | 0.26473193  | 0.341 | 0.198 |
| GLG1        | 7.25E-95 | 0.326549786 | 0.597 | 0.441 |
| TBC1D151    | 8.69E-95 | 0.309647114 | 0.621 | 0.461 |
| ADSS1       | 1.90E-94 | 0.290867937 | 0.521 | 0.357 |
| FAM214A1    | 2.13E-94 | 0.362611978 | 0.554 | 0.39  |
| SLTM        | 2.49E-94 | 0.282452783 | 0.703 | 0.544 |
| TMEM140     | 2.28E-93 | 0.25654383  | 0.291 | 0.164 |
| AUH         | 3.55E-93 | 0.3621384   | 0.366 | 0.227 |
| PIK3IP1-AS1 | 5.08E-93 | 0.286086085 | 0.25  | 0.132 |
| SUMO2       | 5.68E-93 | 0.266917471 | 0.805 | 0.694 |
| EPB411      | 6.86E-93 | 0.375767769 | 0.646 | 0.477 |
| KIAA0319L1  | 3.17E-92 | 0.376880779 | 0.344 | 0.209 |
| CNIH1       | 4.89E-92 | 0.327611915 | 0.349 | 0.218 |
| HDAC41      | 9.49E-92 | 0.33995814  | 0.531 | 0.37  |
| RAB2A       | 1.29E-91 | 0.311265273 | 0.747 | 0.605 |
| SNRNP35     | 1.42E-91 | 0.261611101 | 0.278 | 0.156 |
| PSMB81      | 1.68E-91 | 0.30767481  | 0.602 | 0.459 |
| UBR21       | 2.14E-91 | 0.359405683 | 0.575 | 0.422 |
| OGA         | 2.25E-90 | 0.290463848 | 0.64  | 0.475 |
| PSPC1       | 2.46E-90 | 0.284956597 | 0.602 | 0.441 |
| SSH1        | 3.38E-90 | 0.285255085 | 0.317 | 0.187 |
| ISG151      | 8.09E-90 | 0.46326256  | 0.593 | 0.432 |
| CLASP11     | 9.27E-90 | 0.314522781 | 0.575 | 0.414 |
| PIK3R5      | 1.02E-89 | 0.286357712 | 0.52  | 0.358 |
| GPBP11      | 8.16E-89 | 0.276258427 | 0.849 | 0.708 |
| MOSMO       | 1.10E-88 | 0.354140676 | 0.328 | 0.198 |
| CRYBG11     | 1.65E-88 | 0.457874944 | 0.618 | 0.468 |
| PPHLN1      | 4.24E-88 | 0.297252009 | 0.612 | 0.457 |
| ZC3H18      | 7.82E-88 | 0.282772849 | 0.417 | 0.273 |
| STIM11      | 8.44E-88 | 0.332188788 | 0.531 | 0.371 |
| CHORDC11    | 1.04E-87 | 0.424609541 | 0.634 | 0.482 |
| SACM1L      | 1.31E-87 | 0.286441691 | 0.354 | 0.218 |
| MAN1A2      | 1.88E-87 | 0.367763756 | 0.482 | 0.34  |
| PSMA11      | 5.49E-87 | 0.266813691 | 0.669 | 0.512 |

|           |          |             |       |       |
|-----------|----------|-------------|-------|-------|
| TTC7A1    | 6.47E-87 | 0.333235572 | 0.403 | 0.266 |
| YAF2      | 1.82E-86 | 0.308405486 | 0.465 | 0.317 |
| WDR44     | 3.90E-86 | 0.392539356 | 0.309 | 0.186 |
| ELK31     | 5.41E-86 | 0.270609873 | 0.471 | 0.319 |
| ATXN2     | 7.18E-86 | 0.322099472 | 0.406 | 0.267 |
| PTPN1     | 8.26E-86 | 0.300398467 | 0.716 | 0.563 |
| RFFL1     | 1.29E-85 | 0.275585912 | 0.347 | 0.213 |
| GTF3C6    | 2.24E-85 | 0.268217919 | 0.458 | 0.315 |
| IP6K1     | 2.44E-85 | 0.275328604 | 0.46  | 0.309 |
| RPRD21    | 3.05E-85 | 0.321218543 | 0.438 | 0.288 |
| PTPN41    | 3.76E-85 | 0.490035031 | 0.428 | 0.287 |
| GBF1      | 1.13E-84 | 0.341345898 | 0.547 | 0.4   |
| DDX6      | 6.20E-84 | 0.285302016 | 0.663 | 0.518 |
| ITFG1     | 6.50E-84 | 0.347314121 | 0.5   | 0.356 |
| FAM104A   | 1.81E-83 | 0.251236844 | 0.284 | 0.166 |
| MKLN1     | 1.98E-83 | 0.389220048 | 0.673 | 0.53  |
| PCNX11    | 2.24E-83 | 0.29515336  | 0.636 | 0.483 |
| ARAP22    | 2.27E-83 | 0.410797466 | 0.618 | 0.467 |
| N4BP2L21  | 1.01E-82 | 0.25589714  | 0.799 | 0.655 |
| AHSA11    | 8.90E-82 | 0.341424688 | 0.529 | 0.386 |
| PPP1R12A1 | 9.73E-82 | 0.264796731 | 0.753 | 0.602 |
| NUP58     | 1.11E-81 | 0.368925764 | 0.432 | 0.298 |
| EGLN1     | 1.55E-81 | 0.304766586 | 0.305 | 0.184 |
| ABI1      | 2.64E-81 | 0.324139211 | 0.614 | 0.469 |
| UCP21     | 4.69E-81 | 0.307892197 | 0.544 | 0.4   |
| ENO1      | 1.48E-80 | 0.299745969 | 0.691 | 0.545 |
| ATP9B1    | 2.26E-80 | 0.309885528 | 0.567 | 0.413 |
| RIPOR2    | 2.79E-80 | 0.251229838 | 0.638 | 0.471 |
| SESN11    | 3.63E-80 | 0.519104967 | 0.383 | 0.257 |
| ARHGAP12  | 3.69E-80 | 0.321076371 | 0.269 | 0.157 |
| ARID2     | 3.90E-80 | 0.348934025 | 0.553 | 0.409 |
| ATG5      | 5.81E-80 | 0.293322807 | 0.51  | 0.367 |
| IFFO2     | 8.53E-80 | 0.283612916 | 0.288 | 0.171 |
| EXOC4     | 1.08E-79 | 0.357641334 | 0.687 | 0.539 |
| MYCBP21   | 1.24E-79 | 0.25968773  | 0.781 | 0.636 |
| IRF11     | 1.25E-79 | 0.290643878 | 0.679 | 0.536 |
| CD59      | 2.78E-79 | 0.259237926 | 0.342 | 0.218 |
| ZC3H8     | 6.31E-79 | 0.266934446 | 0.315 | 0.191 |
| EML41     | 1.09E-78 | 0.314717929 | 0.844 | 0.7   |
| ENTPD11   | 1.46E-78 | 0.31738829  | 0.357 | 0.232 |
| CUTA1     | 7.64E-78 | 0.251076413 | 0.557 | 0.418 |
| CRLF3     | 7.69E-78 | 0.293367306 | 0.384 | 0.252 |
| OSBPL81   | 4.09E-77 | 0.427359203 | 0.822 | 0.699 |

|           |          |             |       |       |
|-----------|----------|-------------|-------|-------|
| SPPL2A    | 4.23E-77 | 0.289284583 | 0.461 | 0.324 |
| SEC11A    | 4.46E-77 | 0.255635139 | 0.608 | 0.467 |
| ACSL4     | 6.16E-77 | 0.268345187 | 0.371 | 0.246 |
| DCAF8     | 6.50E-77 | 0.260750985 | 0.356 | 0.231 |
| FXR1      | 1.97E-76 | 0.277120597 | 0.639 | 0.499 |
| GMDS      | 4.12E-76 | 0.288640826 | 0.582 | 0.435 |
| ATXN71    | 4.73E-76 | 0.274407701 | 0.51  | 0.361 |
| C17orf67  | 5.64E-76 | 0.327516457 | 0.273 | 0.162 |
| TRPC4AP1  | 1.39E-75 | 0.303085095 | 0.503 | 0.363 |
| ELOVL5    | 3.29E-75 | 0.268224947 | 0.711 | 0.558 |
| HLA-C1    | 3.74E-75 | 0.265761807 | 0.946 | 0.904 |
| OTUD5     | 4.09E-75 | 0.325556361 | 0.362 | 0.239 |
| PPP2R5C2  | 5.23E-75 | 0.259827019 | 0.881 | 0.756 |
| ARHGAP251 | 1.04E-74 | 0.315787751 | 0.458 | 0.321 |
| RASA12    | 1.05E-74 | 0.318168679 | 0.578 | 0.427 |
| PRKACB1   | 3.41E-74 | 0.269025171 | 0.441 | 0.3   |
| TRIM14    | 3.08E-73 | 0.250344768 | 0.322 | 0.202 |
| ASCC3     | 5.59E-73 | 0.297304287 | 0.521 | 0.381 |
| ANKH1     | 6.20E-73 | 0.252680591 | 0.401 | 0.265 |
| ESYT21    | 6.37E-73 | 0.253829486 | 0.653 | 0.501 |
| SORL1     | 9.95E-73 | 0.38607533  | 0.37  | 0.248 |
| PSMD1     | 1.32E-72 | 0.297889754 | 0.397 | 0.271 |
| ANKRD13C1 | 1.67E-72 | 0.26298775  | 0.397 | 0.262 |
| RBM27     | 2.53E-71 | 0.306714585 | 0.542 | 0.404 |
| MXI11     | 5.64E-71 | 0.263607901 | 0.292 | 0.179 |
| DYNC1I2   | 6.30E-71 | 0.426995882 | 0.354 | 0.244 |
| CAPZA2    | 6.98E-71 | 0.284822374 | 0.552 | 0.419 |
| AEBP21    | 9.32E-71 | 0.271230997 | 0.408 | 0.276 |
| CYTH11    | 5.83E-70 | 0.311003186 | 0.804 | 0.681 |
| PACS12    | 1.16E-69 | 0.280107171 | 0.636 | 0.481 |
| LRRC8D1   | 1.85E-69 | 0.373299935 | 0.32  | 0.208 |
| ZMYND8    | 1.45E-68 | 0.253495279 | 0.376 | 0.251 |
| SPG11     | 1.46E-68 | 0.261689608 | 0.438 | 0.307 |
| ABHD18    | 3.09E-68 | 0.254962497 | 0.342 | 0.222 |
| ITGAV     | 4.12E-68 | 0.357579645 | 0.311 | 0.199 |
| VPS13B    | 4.23E-68 | 0.266734178 | 0.723 | 0.589 |
| SH3GLB1   | 6.08E-68 | 0.28225174  | 0.505 | 0.382 |
| RUNX22    | 9.76E-68 | 0.377138987 | 0.398 | 0.278 |
| KANSL12   | 1.40E-67 | 0.265768823 | 0.669 | 0.526 |
| RELCH     | 3.05E-67 | 0.264360331 | 0.401 | 0.272 |
| GIGYF2    | 4.39E-67 | 0.267882221 | 0.434 | 0.31  |
| AGFG1     | 7.23E-67 | 0.328442757 | 0.485 | 0.361 |
| SH3TC1    | 2.59E-66 | 0.255917574 | 0.26  | 0.16  |



|          |          |             |       |       |
|----------|----------|-------------|-------|-------|
| C18orf25 | 1.58E-65 | 0.303410747 | 0.402 | 0.278 |
| DTNB     | 1.89E-65 | 0.286667702 | 0.322 | 0.208 |
| NPTN     | 2.09E-65 | 0.282254986 | 0.351 | 0.236 |
| NAA25    | 1.45E-64 | 0.262139949 | 0.272 | 0.167 |
| IFI61    | 8.18E-64 | 0.326179192 | 0.445 | 0.313 |
| DGLUCY   | 1.99E-63 | 0.256904017 | 0.28  | 0.176 |
| PCCA     | 2.60E-63 | 0.26159654  | 0.318 | 0.209 |
| COX5A    | 4.25E-63 | 0.301545313 | 0.56  | 0.437 |
| AFTPH1   | 2.36E-62 | 0.285986077 | 0.467 | 0.344 |
| PKM      | 1.74E-61 | 0.276787411 | 0.542 | 0.41  |
| AFF11    | 4.80E-61 | 0.333605728 | 0.582 | 0.456 |
| DCP2     | 5.73E-61 | 0.268754111 | 0.399 | 0.282 |
| CAPN71   | 5.01E-60 | 0.256586082 | 0.457 | 0.333 |
| ABTB2    | 6.81E-58 | 0.383860191 | 0.277 | 0.178 |
| NAA16    | 1.00E-57 | 0.259009092 | 0.283 | 0.182 |
| STIP11   | 1.59E-57 | 0.276016291 | 0.472 | 0.356 |
| BCL2L11  | 4.10E-57 | 0.304085038 | 0.468 | 0.352 |
| SHLD2    | 6.56E-57 | 0.317831861 | 0.376 | 0.268 |
| TYW1     | 5.25E-56 | 0.274129153 | 0.371 | 0.257 |
| CEP350   | 9.67E-56 | 0.255852707 | 0.564 | 0.442 |
| ARHGAP52 | 2.89E-55 | 0.26959414  | 0.331 | 0.226 |
| SLC4A71  | 1.21E-54 | 0.284278106 | 0.538 | 0.416 |
| MX11     | 1.45E-54 | 0.36101548  | 0.423 | 0.312 |
| AHCYL2   | 1.39E-53 | 0.251073867 | 0.305 | 0.203 |
| TNPO3    | 1.40E-53 | 0.256940283 | 0.436 | 0.32  |
| XIST     | 4.24E-53 | 0.359934232 | 0.299 | 0.203 |
| ATP8A11  | 4.46E-53 | 0.268303561 | 0.553 | 0.419 |
| RFX32    | 5.06E-53 | 0.254425239 | 0.562 | 0.432 |
| UBE2H    | 6.14E-53 | 0.263472642 | 0.637 | 0.514 |
| DIP2B1   | 6.07E-51 | 0.250932824 | 0.48  | 0.362 |
| BTA1F1   | 8.03E-50 | 0.262132264 | 0.502 | 0.39  |
| STT3B1   | 2.91E-48 | 0.250862674 | 0.541 | 0.43  |
| SERINC51 | 1.76E-47 | 0.3122865   | 0.447 | 0.334 |
| CEP83    | 1.26E-46 | 0.301646623 | 0.285 | 0.197 |
| TMEM65   | 4.56E-46 | 0.313742271 | 0.315 | 0.222 |
| EXOC6B1  | 1.43E-44 | 0.279380309 | 0.325 | 0.23  |
| CELF21   | 1.91E-41 | 0.252318479 | 0.817 | 0.713 |
| PDE4D    | 3.31E-41 | 0.461544024 | 0.598 | 0.511 |
| SLC1A4   | 3.89E-37 | 0.302672736 | 0.284 | 0.207 |
| MAP4K31  | 1.19E-29 | 0.253691723 | 0.401 | 0.319 |
| EREG     | 0        | 4.334376524 | 0.774 | 0.026 |
| IL1B     | 0        | 4.139142763 | 0.909 | 0.052 |
| DOCK4    | 0        | 3.544039849 | 0.938 | 0.098 |

|            |   |             |       |       |
|------------|---|-------------|-------|-------|
| LYZ        | 0 | 3.462298647 | 0.919 | 0.077 |
| SLC16A10   | 0 | 3.456574117 | 0.799 | 0.092 |
| THBS1      | 0 | 3.423334822 | 0.658 | 0.033 |
| KYNU       | 0 | 3.312981737 | 0.952 | 0.129 |
| FMN1       | 0 | 3.133858808 | 0.898 | 0.085 |
| AL078604.4 | 0 | 3.087280683 | 0.833 | 0.105 |
| TIMP1      | 0 | 3.062528476 | 0.842 | 0.189 |
| PLXDC2     | 0 | 3.02339144  | 0.941 | 0.062 |
| IER3       | 0 | 3.011206731 | 0.94  | 0.167 |
| PID1       | 0 | 2.970764922 | 0.677 | 0.019 |
| RBM47      | 0 | 2.967715569 | 0.963 | 0.126 |
| CST3       | 0 | 2.96207643  | 0.933 | 0.13  |
| VCAN       | 0 | 2.894031985 | 0.61  | 0.026 |
| SLC8A1     | 0 | 2.868271558 | 0.917 | 0.055 |
| LRMDA      | 0 | 2.865586758 | 0.913 | 0.047 |
| G0S2       | 0 | 2.848386874 | 0.753 | 0.054 |
| FNIP2      | 0 | 2.844816232 | 0.883 | 0.091 |
| AC099489.1 | 0 | 2.824418753 | 0.753 | 0.111 |
| IFI30      | 0 | 2.786232038 | 0.943 | 0.182 |
| CXCL8      | 0 | 2.779049065 | 0.856 | 0.076 |
| PLAUR      | 0 | 2.769480323 | 0.956 | 0.092 |
| AIF1       | 0 | 2.767031094 | 0.904 | 0.089 |
| MCTP1      | 0 | 2.70295917  | 0.911 | 0.065 |
| EPB41L3    | 0 | 2.694690378 | 0.884 | 0.034 |
| SOD2       | 0 | 2.655092291 | 0.984 | 0.53  |
| FCER1G     | 0 | 2.613003966 | 0.903 | 0.088 |
| ABCA1      | 0 | 2.53844352  | 0.83  | 0.072 |
| DMXL2      | 0 | 2.525360567 | 0.785 | 0.041 |
| TYROBP     | 0 | 2.490125467 | 0.936 | 0.127 |
| DENND5A    | 0 | 2.47852379  | 0.871 | 0.114 |
| RAB31      | 0 | 2.476647256 | 0.949 | 0.11  |
| S100A9     | 0 | 2.44224925  | 0.795 | 0.193 |
| SPP1       | 0 | 2.431689851 | 0.353 | 0.062 |
| CXCL3      | 0 | 2.419396264 | 0.6   | 0.028 |
| CTSB       | 0 | 2.392157974 | 0.949 | 0.221 |
| C15orf48   | 0 | 2.357019767 | 0.752 | 0.048 |
| ALCAM      | 0 | 2.326785971 | 0.829 | 0.236 |
| CXCL2      | 0 | 2.313685638 | 0.738 | 0.034 |
| QKI        | 0 | 2.299673008 | 0.98  | 0.463 |
| AREG       | 0 | 2.285915505 | 0.789 | 0.291 |
| C5AR1      | 0 | 2.280616575 | 0.773 | 0.043 |
| FCGR2A     | 0 | 2.269870408 | 0.907 | 0.056 |
| FNDC3B     | 0 | 2.250696849 | 0.958 | 0.359 |

|           |   |             |       |       |
|-----------|---|-------------|-------|-------|
| PAPSS2    | 0 | 2.241669674 | 0.697 | 0.032 |
| C1QB      | 0 | 2.222784616 | 0.504 | 0.064 |
| C1QA      | 0 | 2.218589861 | 0.537 | 0.062 |
| ABL2      | 0 | 2.215718965 | 0.851 | 0.14  |
| PTGS2     | 0 | 2.210507394 | 0.731 | 0.033 |
| IRAK3     | 0 | 2.179921445 | 0.928 | 0.111 |
| ATP13A31  | 0 | 2.1568501   | 0.932 | 0.277 |
| OLR1      | 0 | 2.154154668 | 0.702 | 0.024 |
| FMNL2     | 0 | 2.150853366 | 0.632 | 0.078 |
| PSAP      | 0 | 2.148383082 | 0.958 | 0.372 |
| FGD4      | 0 | 2.116497714 | 0.898 | 0.075 |
| CD14      | 0 | 2.114559053 | 0.749 | 0.037 |
| MS4A6A    | 0 | 2.100238208 | 0.781 | 0.051 |
| BCL2A1    | 0 | 2.094551667 | 0.902 | 0.195 |
| ETS2      | 0 | 2.082661065 | 0.913 | 0.092 |
| MRC1      | 0 | 2.081894297 | 0.683 | 0.045 |
| PLEK      | 0 | 2.075741019 | 0.921 | 0.134 |
| CSF2RA    | 0 | 2.074889634 | 0.846 | 0.039 |
| SESTD11   | 0 | 2.0626107   | 0.788 | 0.145 |
| RNF144B1  | 0 | 2.061028504 | 0.87  | 0.12  |
| IL1RN     | 0 | 2.057731289 | 0.662 | 0.035 |
| FTL       | 0 | 2.051223094 | 0.99  | 0.922 |
| CCL20     | 0 | 2.026934735 | 0.472 | 0.077 |
| NLRP3     | 0 | 2.019332664 | 0.75  | 0.046 |
| DAPK1     | 0 | 2.006348124 | 0.714 | 0.045 |
| HLA-DRB11 | 0 | 2.002840953 | 0.948 | 0.546 |
| TYMP      | 0 | 2.002345998 | 0.951 | 0.376 |
| NFKB1     | 0 | 1.998390481 | 0.983 | 0.57  |
| LIMS1     | 0 | 1.986519057 | 0.957 | 0.446 |
| ABR       | 0 | 1.982158221 | 0.872 | 0.219 |
| ZEB21     | 0 | 1.977818162 | 0.969 | 0.423 |
| NEAT1     | 0 | 1.977406575 | 0.995 | 0.814 |
| EMILIN2   | 0 | 1.976670442 | 0.89  | 0.107 |
| CD163     | 0 | 1.968924349 | 0.696 | 0.029 |
| CD86      | 0 | 1.967130877 | 0.818 | 0.098 |
| MAMLD1    | 0 | 1.961851477 | 0.564 | 0.03  |
| ITGAX     | 0 | 1.956815242 | 0.833 | 0.056 |
| GLUL      | 0 | 1.954030052 | 0.886 | 0.173 |
| SIPA1L11  | 0 | 1.95373903  | 0.99  | 0.656 |
| SRGAP1    | 0 | 1.944542471 | 0.695 | 0.032 |
| MAP2K1    | 0 | 1.939256099 | 0.934 | 0.358 |
| ANXA5     | 0 | 1.928563058 | 0.946 | 0.358 |
| NAMPT     | 0 | 1.914259295 | 0.986 | 0.51  |

|            |   |             |       |       |
|------------|---|-------------|-------|-------|
| KMO        | 0 | 1.901317303 | 0.676 | 0.053 |
| VEGFA      | 0 | 1.890888947 | 0.765 | 0.042 |
| TET2       | 0 | 1.888082109 | 0.952 | 0.42  |
| DSE        | 0 | 1.880433088 | 0.867 | 0.141 |
| IRAK2      | 0 | 1.879359728 | 0.838 | 0.134 |
| CTSS       | 0 | 1.87747595  | 0.955 | 0.465 |
| CUX1       | 0 | 1.874557892 | 0.95  | 0.344 |
| CCL31      | 0 | 1.866369491 | 0.676 | 0.109 |
| HBEGF      | 0 | 1.851219896 | 0.716 | 0.047 |
| SERPINA1   | 0 | 1.849689849 | 0.772 | 0.03  |
| AC025580.2 | 0 | 1.838884125 | 0.718 | 0.021 |
| CD109      | 0 | 1.830563472 | 0.706 | 0.087 |
| MANBA1     | 0 | 1.828628365 | 0.894 | 0.298 |
| FTH1       | 0 | 1.827728892 | 0.995 | 0.939 |
| GRN        | 0 | 1.815866339 | 0.875 | 0.157 |
| IFITM3     | 0 | 1.811555639 | 0.781 | 0.141 |
| GNAQ       | 0 | 1.808792377 | 0.927 | 0.187 |
| LUCAT1     | 0 | 1.793505403 | 0.739 | 0.071 |
| ICAM1      | 0 | 1.789575261 | 0.897 | 0.133 |
| PSD3       | 0 | 1.781555527 | 0.571 | 0.062 |
| ACSL1      | 0 | 1.779929055 | 0.901 | 0.193 |
| HLA-DRA1   | 0 | 1.775564706 | 0.978 | 0.506 |
| LST1       | 0 | 1.773585926 | 0.835 | 0.085 |
| INHBA      | 0 | 1.770861234 | 0.363 | 0.017 |
| BASP1      | 0 | 1.767417471 | 0.855 | 0.25  |
| HLA-DPA11  | 0 | 1.75996782  | 0.917 | 0.551 |
| MS4A7      | 0 | 1.757341894 | 0.779 | 0.051 |
| JARID2     | 0 | 1.753887197 | 0.968 | 0.559 |
| SLC11A1    | 0 | 1.752879949 | 0.674 | 0.035 |
| MAFB       | 0 | 1.752056614 | 0.728 | 0.042 |
| TGFBI      | 0 | 1.75026285  | 0.778 | 0.046 |
| ASAP1      | 0 | 1.734328843 | 0.916 | 0.424 |
| NPC2       | 0 | 1.720144286 | 0.874 | 0.283 |
| MXD1       | 0 | 1.718136693 | 0.915 | 0.21  |
| PRKAG2     | 0 | 1.713891473 | 0.878 | 0.236 |
| FGL2       | 0 | 1.708896358 | 0.767 | 0.09  |
| ZFYVE16    | 0 | 1.707243505 | 0.817 | 0.181 |
| ZMIZ1      | 0 | 1.696546836 | 0.868 | 0.113 |
| TLR2       | 0 | 1.695398176 | 0.763 | 0.037 |
| KIF1B      | 0 | 1.694916234 | 0.822 | 0.223 |
| MYO9B      | 0 | 1.694166489 | 0.921 | 0.355 |
| ADGRE2     | 0 | 1.689943946 | 0.726 | 0.028 |
| AZIN1-AS1  | 0 | 1.689898299 | 0.755 | 0.088 |

|          |   |             |       |       |
|----------|---|-------------|-------|-------|
| WARS     | 0 | 1.688624337 | 0.681 | 0.09  |
| CLIC4    | 0 | 1.676324164 | 0.8   | 0.172 |
| CTSL     | 0 | 1.66768287  | 0.668 | 0.06  |
| AMPD3    | 0 | 1.665720588 | 0.667 | 0.075 |
| C1QC     | 0 | 1.663312371 | 0.438 | 0.039 |
| CPVL     | 0 | 1.660042067 | 0.731 | 0.033 |
| ARL8B    | 0 | 1.655885402 | 0.934 | 0.37  |
| CD68     | 0 | 1.652708157 | 0.779 | 0.061 |
| PIK3R51  | 0 | 1.64844102  | 0.914 | 0.332 |
| CTSZ     | 0 | 1.641661434 | 0.887 | 0.291 |
| S100A11  | 0 | 1.639628344 | 0.955 | 0.569 |
| FPR1     | 0 | 1.635710224 | 0.768 | 0.031 |
| FCN1     | 0 | 1.632017528 | 0.427 | 0.007 |
| MOB3B1   | 0 | 1.627335076 | 0.758 | 0.1   |
| ARHGAP26 | 0 | 1.625885285 | 0.946 | 0.458 |
| SDS      | 0 | 1.619071768 | 0.476 | 0.021 |
| FLOT1    | 0 | 1.617795803 | 0.839 | 0.157 |
| SPAG9    | 0 | 1.616710577 | 0.964 | 0.452 |
| TCF7L2   | 0 | 1.612701254 | 0.591 | 0.051 |
| CYBB1    | 0 | 1.60953751  | 0.792 | 0.144 |
| ANXA2    | 0 | 1.590248002 | 0.928 | 0.359 |
| IGSF6    | 0 | 1.590235055 | 0.706 | 0.049 |
| FAM49A1  | 0 | 1.58699578  | 0.918 | 0.228 |
| NUMB     | 0 | 1.577201422 | 0.867 | 0.337 |
| FOXO3    | 0 | 1.554318431 | 0.868 | 0.3   |
| RAB20    | 0 | 1.553222796 | 0.768 | 0.048 |
| CTSD     | 0 | 1.551641767 | 0.777 | 0.333 |
| SLC43A2  | 0 | 1.544483059 | 0.807 | 0.086 |
| PPIF     | 0 | 1.543059332 | 0.762 | 0.113 |
| CCL3L1   | 0 | 1.541441874 | 0.519 | 0.064 |
| HCK      | 0 | 1.540057105 | 0.8   | 0.047 |
| PMP22    | 0 | 1.537371138 | 0.638 | 0.034 |
| MB21D2   | 0 | 1.516634216 | 0.712 | 0.091 |
| FCGRT    | 0 | 1.514989913 | 0.801 | 0.112 |
| LCP2     | 0 | 1.514632267 | 0.917 | 0.276 |
| SLC1A3   | 0 | 1.511901199 | 0.541 | 0.024 |
| RABGEF1  | 0 | 1.510565053 | 0.939 | 0.435 |
| NRP1     | 0 | 1.503742926 | 0.556 | 0.036 |
| PPARD1   | 0 | 1.49975053  | 0.833 | 0.178 |
| MARCKS   | 0 | 1.498095908 | 0.762 | 0.135 |
| CD44     | 0 | 1.496595742 | 0.957 | 0.773 |
| CD741    | 0 | 1.496571837 | 0.98  | 0.701 |
| LITAF    | 0 | 1.495708927 | 0.976 | 0.498 |

|            |   |             |       |       |
|------------|---|-------------|-------|-------|
| MGAT1      | 0 | 1.493346407 | 0.862 | 0.203 |
| CCDC88A    | 0 | 1.48446511  | 0.845 | 0.123 |
| APOE       | 0 | 1.478477675 | 0.352 | 0.079 |
| RALA       | 0 | 1.476315709 | 0.835 | 0.345 |
| NRP2       | 0 | 1.476141159 | 0.553 | 0.028 |
| STX11      | 0 | 1.468515865 | 0.87  | 0.209 |
| SBF2       | 0 | 1.465086515 | 0.851 | 0.168 |
| HLA-DPB11  | 0 | 1.464991366 | 0.923 | 0.573 |
| AQP9       | 0 | 1.462715889 | 0.523 | 0.025 |
| LGALS1     | 0 | 1.458577064 | 0.926 | 0.42  |
| TMEM176B   | 0 | 1.457741304 | 0.584 | 0.039 |
| PSTPIP2    | 0 | 1.457677026 | 0.652 | 0.053 |
| DPYD       | 0 | 1.457575496 | 0.931 | 0.475 |
| AC079753.2 | 0 | 1.457486749 | 0.481 | 0.01  |
| SAT11      | 0 | 1.448230517 | 0.992 | 0.766 |
| SIRPA      | 0 | 1.444861042 | 0.756 | 0.04  |
| CLEC7A     | 0 | 1.440448917 | 0.766 | 0.056 |
| LGALS3     | 0 | 1.439606433 | 0.854 | 0.307 |
| HIF1A1     | 0 | 1.438776229 | 0.94  | 0.521 |
| HLA-DQB11  | 0 | 1.438423438 | 0.852 | 0.395 |
| RIN2       | 0 | 1.437939754 | 0.639 | 0.029 |
| BNIP3L     | 0 | 1.43724316  | 0.81  | 0.262 |
| TNFAIP2    | 0 | 1.436622941 | 0.701 | 0.035 |
| LNCAROD    | 0 | 1.434462614 | 0.361 | 0.019 |
| ELOVL7     | 0 | 1.428852296 | 0.394 | 0.014 |
| SH3PXD2B   | 0 | 1.418746018 | 0.663 | 0.028 |
| AC009093.2 | 0 | 1.417724344 | 0.707 | 0.135 |
| CD631      | 0 | 1.414240789 | 0.897 | 0.423 |
| BCAT1      | 0 | 1.412480672 | 0.684 | 0.078 |
| SGK1       | 0 | 1.407672299 | 0.796 | 0.17  |
| ALDH2      | 0 | 1.406418109 | 0.715 | 0.056 |
| MNDA       | 0 | 1.40518181  | 0.665 | 0.056 |
| FPR3       | 0 | 1.403976124 | 0.654 | 0.026 |
| CTSH       | 0 | 1.403534647 | 0.808 | 0.186 |
| THBD       | 0 | 1.402155543 | 0.588 | 0.029 |
| SLCO3A1    | 0 | 1.395537903 | 0.786 | 0.165 |
| SLC39A8    | 0 | 1.392773526 | 0.607 | 0.162 |
| NCOR2      | 0 | 1.391091948 | 0.85  | 0.197 |
| ATP2B11    | 0 | 1.390824822 | 0.934 | 0.627 |
| B3GNT5     | 0 | 1.390235503 | 0.735 | 0.072 |
| LDLRAD3    | 0 | 1.389858549 | 0.577 | 0.02  |
| FBP1       | 0 | 1.388158225 | 0.569 | 0.035 |
| CALHM61    | 0 | 1.387581463 | 0.643 | 0.085 |

|            |   |             |       |       |
|------------|---|-------------|-------|-------|
| RAB7A      | 0 | 1.386860541 | 0.971 | 0.573 |
| FCGR3A     | 0 | 1.385855352 | 0.582 | 0.066 |
| UBE2E21    | 0 | 1.381679793 | 0.867 | 0.209 |
| GAB21      | 0 | 1.381181405 | 0.903 | 0.284 |
| ARHGAP31   | 0 | 1.381114901 | 0.745 | 0.105 |
| C1orf162   | 0 | 1.377799074 | 0.744 | 0.12  |
| MIR155HG   | 0 | 1.371936703 | 0.595 | 0.173 |
| CLEC10A    | 0 | 1.368018081 | 0.454 | 0.012 |
| NPHS1      | 0 | 1.363676785 | 0.351 | 0.02  |
| VIM        | 0 | 1.363306878 | 0.983 | 0.749 |
| NINJ1      | 0 | 1.361093229 | 0.797 | 0.137 |
| GSN        | 0 | 1.360190777 | 0.745 | 0.122 |
| PTPRE      | 0 | 1.3593306   | 0.834 | 0.161 |
| CD300E     | 0 | 1.35826427  | 0.459 | 0.008 |
| ST18       | 0 | 1.352795132 | 0.459 | 0.015 |
| CSF1R      | 0 | 1.352088698 | 0.683 | 0.03  |
| CIITA1     | 0 | 1.351313062 | 0.729 | 0.112 |
| SGMS2      | 0 | 1.349808083 | 0.534 | 0.025 |
| IFNGR21    | 0 | 1.349792582 | 0.853 | 0.17  |
| NFE2L2     | 0 | 1.349398268 | 0.962 | 0.505 |
| PTPN12     | 0 | 1.34845498  | 0.82  | 0.16  |
| MAML3      | 0 | 1.34837151  | 0.757 | 0.157 |
| ANPEP      | 0 | 1.34675092  | 0.552 | 0.015 |
| BID        | 0 | 1.344708052 | 0.8   | 0.17  |
| RASGEF1B1  | 0 | 1.341472265 | 0.907 | 0.334 |
| MMP19      | 0 | 1.339592129 | 0.46  | 0.015 |
| GK1        | 0 | 1.337870338 | 0.878 | 0.231 |
| GRB21      | 0 | 1.336651238 | 0.957 | 0.572 |
| SERPINB1   | 0 | 1.333363862 | 0.887 | 0.361 |
| SPI1       | 0 | 1.326954881 | 0.798 | 0.083 |
| S100A8     | 0 | 1.325854623 | 0.595 | 0.142 |
| UPP1       | 0 | 1.322982201 | 0.84  | 0.2   |
| ARFGAP3    | 0 | 1.322166977 | 0.804 | 0.237 |
| MAFF       | 0 | 1.319295523 | 0.782 | 0.122 |
| LGALS2     | 0 | 1.317791771 | 0.53  | 0.019 |
| FLT1       | 0 | 1.315584812 | 0.415 | 0.055 |
| RHOQ1      | 0 | 1.315252264 | 0.814 | 0.188 |
| MAP3K81    | 0 | 1.315184668 | 0.923 | 0.385 |
| TAOK3      | 0 | 1.310597609 | 0.924 | 0.534 |
| MIR181A1HG | 0 | 1.307101214 | 0.705 | 0.142 |
| S100A10    | 0 | 1.305044584 | 0.929 | 0.579 |
| RIN31      | 0 | 1.297325547 | 0.809 | 0.213 |
| BRI3       | 0 | 1.296793087 | 0.872 | 0.296 |

|            |   |             |       |       |
|------------|---|-------------|-------|-------|
| CAPG       | 0 | 1.29620466  | 0.77  | 0.206 |
| PFKFB3     | 0 | 1.287899466 | 0.928 | 0.377 |
| ATP1B31    | 0 | 1.287496675 | 0.972 | 0.631 |
| LHFPL2     | 0 | 1.285158164 | 0.59  | 0.049 |
| SEMA6B     | 0 | 1.284727895 | 0.573 | 0.011 |
| TREM1      | 0 | 1.277421462 | 0.629 | 0.026 |
| HLA-DQA11  | 0 | 1.271990099 | 0.784 | 0.386 |
| ACSL3      | 0 | 1.271097327 | 0.78  | 0.246 |
| ARHGAP10   | 0 | 1.270844183 | 0.703 | 0.15  |
| RASAL2     | 0 | 1.270655001 | 0.442 | 0.028 |
| SDC2       | 0 | 1.269585615 | 0.449 | 0.022 |
| ASAH1      | 0 | 1.26839612  | 0.829 | 0.207 |
| RETN       | 0 | 1.265022821 | 0.357 | 0.008 |
| CREB5      | 0 | 1.261982616 | 0.604 | 0.039 |
| KCTD12     | 0 | 1.261673812 | 0.662 | 0.042 |
| KLF4       | 0 | 1.258146187 | 0.696 | 0.069 |
| GPR183     | 0 | 1.246449588 | 0.88  | 0.512 |
| FAM151B    | 0 | 1.243877875 | 0.366 | 0.017 |
| NR4A31     | 0 | 1.243787739 | 0.894 | 0.33  |
| RNF130     | 0 | 1.242076859 | 0.871 | 0.174 |
| ITGB8      | 0 | 1.239879244 | 0.42  | 0.039 |
| GPR137B    | 0 | 1.237288367 | 0.662 | 0.204 |
| RAPGEF2    | 0 | 1.236987879 | 0.789 | 0.365 |
| DRAM1      | 0 | 1.235834236 | 0.653 | 0.095 |
| ZNF267     | 0 | 1.231988832 | 0.875 | 0.254 |
| TBXAS1     | 0 | 1.231701039 | 0.829 | 0.147 |
| APOC1      | 0 | 1.230283798 | 0.337 | 0.042 |
| RNASE1     | 0 | 1.227052894 | 0.271 | 0.03  |
| NCF2       | 0 | 1.225994512 | 0.725 | 0.055 |
| FGR        | 0 | 1.221293759 | 0.691 | 0.041 |
| SULF2      | 0 | 1.21944094  | 0.618 | 0.08  |
| IL1A       | 0 | 1.217817117 | 0.46  | 0.016 |
| PILRA      | 0 | 1.21479379  | 0.714 | 0.072 |
| MFSD1      | 0 | 1.214589217 | 0.771 | 0.126 |
| SASH1      | 0 | 1.210024523 | 0.377 | 0.022 |
| TPRA1      | 0 | 1.209104198 | 0.657 | 0.063 |
| PLSCR1     | 0 | 1.201759646 | 0.866 | 0.22  |
| AC083837.1 | 0 | 1.201449887 | 0.429 | 0.066 |
| IL6R       | 0 | 1.199060744 | 0.736 | 0.116 |
| AXL        | 0 | 1.197491564 | 0.478 | 0.035 |
| TOM1       | 0 | 1.192250222 | 0.844 | 0.198 |
| MMP9       | 0 | 1.190365747 | 0.446 | 0.029 |
| TNS3       | 0 | 1.187401233 | 0.621 | 0.141 |



|          |   |             |       |       |
|----------|---|-------------|-------|-------|
| SPRED1   | 0 | 1.185755061 | 0.452 | 0.033 |
| CD831    | 0 | 1.185389922 | 0.962 | 0.398 |
| PLXNC1   | 0 | 1.184931161 | 0.727 | 0.13  |
| RIPK2    | 0 | 1.184244795 | 0.735 | 0.154 |
| ZSWIM61  | 0 | 1.179129252 | 0.97  | 0.61  |
| ITGA5    | 0 | 1.178927883 | 0.655 | 0.07  |
| MSR1     | 0 | 1.177529368 | 0.491 | 0.028 |
| SLC25A37 | 0 | 1.176130284 | 0.587 | 0.117 |
| B4GALT5  | 0 | 1.176071812 | 0.735 | 0.165 |
| CXCL16   | 0 | 1.167687531 | 0.687 | 0.049 |
| APLP2    | 0 | 1.167260541 | 0.898 | 0.37  |
| AGAP3    | 0 | 1.164704826 | 0.66  | 0.064 |
| SH3BP51  | 0 | 1.16367398  | 0.864 | 0.262 |
| CTNNB1   | 0 | 1.16321539  | 0.884 | 0.432 |
| ITGAV1   | 0 | 1.162939158 | 0.684 | 0.173 |
| IL3RA    | 0 | 1.159554602 | 0.598 | 0.065 |
| TEX14    | 0 | 1.156823073 | 0.774 | 0.264 |
| SEMA4A   | 0 | 1.155451439 | 0.607 | 0.126 |
| PACSIN2  | 0 | 1.150580622 | 0.818 | 0.23  |
| FN1      | 0 | 1.1470435   | 0.274 | 0.048 |
| SH2B31   | 0 | 1.146117585 | 0.814 | 0.178 |
| HIVEP2   | 0 | 1.145175863 | 0.883 | 0.526 |
| RAPH1    | 0 | 1.141556267 | 0.572 | 0.072 |
| UBASH3B  | 0 | 1.139724438 | 0.653 | 0.226 |
| PCSK5    | 0 | 1.139560941 | 0.473 | 0.038 |
| NFIL31   | 0 | 1.135064759 | 0.783 | 0.176 |
| KCNMA1   | 0 | 1.134455024 | 0.259 | 0.032 |
| MAPK6    | 0 | 1.132185133 | 0.804 | 0.225 |
| LPXN     | 0 | 1.131568727 | 0.845 | 0.419 |
| RNF19B   | 0 | 1.131235643 | 0.69  | 0.143 |
| WTAP     | 0 | 1.129463943 | 0.929 | 0.571 |
| CD93     | 0 | 1.122327701 | 0.59  | 0.022 |
| ZFAND51  | 0 | 1.121992014 | 0.904 | 0.46  |
| CDKN1A   | 0 | 1.119566576 | 0.821 | 0.214 |
| TIMP2    | 0 | 1.117904722 | 0.737 | 0.095 |
| GSTO1    | 0 | 1.116008902 | 0.845 | 0.294 |
| PDE4A    | 0 | 1.114942868 | 0.866 | 0.266 |
| CFLAR1   | 0 | 1.113737821 | 0.964 | 0.591 |
| PLCB1    | 0 | 1.113148363 | 0.424 | 0.122 |
| ZFAND31  | 0 | 1.113005509 | 0.975 | 0.625 |
| PHACTR11 | 0 | 1.112910491 | 0.796 | 0.153 |
| TFEC     | 0 | 1.109274361 | 0.6   | 0.058 |
| TNFAIP6  | 0 | 1.107446541 | 0.348 | 0.019 |

|             |   |             |       |       |
|-------------|---|-------------|-------|-------|
| ACTN1       | 0 | 1.106631583 | 0.678 | 0.073 |
| TJP2        | 0 | 1.105417076 | 0.479 | 0.036 |
| F13A1       | 0 | 1.104952084 | 0.394 | 0.019 |
| MS4A4A      | 0 | 1.101201199 | 0.563 | 0.032 |
| SLC44A1     | 0 | 1.100092247 | 0.603 | 0.111 |
| RILPL21     | 0 | 1.097120284 | 0.92  | 0.407 |
| NFAT51      | 0 | 1.096207123 | 0.889 | 0.524 |
| GCH1        | 0 | 1.093955074 | 0.733 | 0.266 |
| PIK3AP11    | 0 | 1.092087173 | 0.719 | 0.175 |
| INSIG1      | 0 | 1.088748655 | 0.731 | 0.219 |
| PALM2-AKAP2 | 0 | 1.088378756 | 0.521 | 0.189 |
| MAP2K3      | 0 | 1.08570689  | 0.822 | 0.225 |
| PLA2G7      | 0 | 1.081297433 | 0.465 | 0.023 |
| CLEC4E      | 0 | 1.075315357 | 0.501 | 0.015 |
| IL4I1       | 0 | 1.073406225 | 0.563 | 0.072 |
| PDE4B1      | 0 | 1.070920015 | 0.965 | 0.616 |
| S100A6      | 0 | 1.070647511 | 0.928 | 0.614 |
| OXSRI       | 0 | 1.06782314  | 0.792 | 0.289 |
| ETV6        | 0 | 1.066195332 | 0.924 | 0.49  |
| NCOA4       | 0 | 1.062035203 | 0.785 | 0.196 |
| ANTXR2      | 0 | 1.058896571 | 0.716 | 0.266 |
| LGMN        | 0 | 1.057279444 | 0.636 | 0.132 |
| PLD1        | 0 | 1.055584339 | 0.388 | 0.031 |
| PDXK        | 0 | 1.054973154 | 0.801 | 0.228 |
| RASGRP31    | 0 | 1.054537971 | 0.496 | 0.128 |
| NFKBIZ      | 0 | 1.052212369 | 0.92  | 0.432 |
| ATP6V1H     | 0 | 1.050873507 | 0.741 | 0.296 |
| TPM4        | 0 | 1.050356457 | 0.91  | 0.419 |
| RAPGEF11    | 0 | 1.048765437 | 0.955 | 0.581 |
| TNFSF13B    | 0 | 1.048208905 | 0.684 | 0.113 |
| LATS2       | 0 | 1.04588153  | 0.62  | 0.069 |
| OGFRL1      | 0 | 1.044085768 | 0.735 | 0.196 |
| TRIO1       | 0 | 1.042926852 | 0.824 | 0.243 |
| TBC1D8      | 0 | 1.041729661 | 0.664 | 0.156 |
| CUL1        | 0 | 1.04159037  | 0.731 | 0.342 |
| GAS71       | 0 | 1.037951853 | 0.581 | 0.112 |
| UBTD2       | 0 | 1.037589856 | 0.543 | 0.096 |
| RNF13       | 0 | 1.037227738 | 0.826 | 0.281 |
| STARD13     | 0 | 1.03570891  | 0.367 | 0.031 |
| TNFRSF21    | 0 | 1.031248632 | 0.48  | 0.029 |
| CORO1C      | 0 | 1.029756698 | 0.696 | 0.119 |
| NHSL1       | 0 | 1.026535358 | 0.429 | 0.03  |
| CPM         | 0 | 1.024587277 | 0.63  | 0.092 |

|            |   |             |       |       |
|------------|---|-------------|-------|-------|
| HLA-DMA1   | 0 | 1.023530817 | 0.813 | 0.33  |
| CHMP4B     | 0 | 1.019353117 | 0.781 | 0.184 |
| AKAP13     | 0 | 1.018817544 | 0.988 | 0.858 |
| AP2S1      | 0 | 1.016522622 | 0.803 | 0.271 |
| TRAF11     | 0 | 1.015901293 | 0.706 | 0.217 |
| CPQ        | 0 | 1.015688485 | 0.756 | 0.174 |
| BHLHE401   | 0 | 1.015380631 | 0.78  | 0.214 |
| ITSN1      | 0 | 1.013640337 | 0.463 | 0.033 |
| TMEM176A   | 0 | 1.013380263 | 0.496 | 0.031 |
| CTBP2      | 0 | 1.012653002 | 0.583 | 0.056 |
| NECTIN2    | 0 | 1.008178331 | 0.605 | 0.029 |
| PLEKHA6    | 0 | 1.007245657 | 0.33  | 0.023 |
| ITGB21     | 0 | 1.006283605 | 0.825 | 0.334 |
| REL1       | 0 | 1.004463064 | 0.973 | 0.642 |
| GPNMB      | 0 | 1.002887432 | 0.363 | 0.04  |
| IL18       | 0 | 1.000981251 | 0.548 | 0.044 |
| COTL1      | 0 | 0.997144305 | 0.921 | 0.526 |
| TTYH2      | 0 | 0.993632987 | 0.507 | 0.029 |
| PDE4DIP    | 0 | 0.991561423 | 0.571 | 0.119 |
| VPS13D     | 0 | 0.990713197 | 0.678 | 0.317 |
| AL356124.1 | 0 | 0.988597587 | 0.425 | 0.066 |
| CENPU      | 0 | 0.986854996 | 0.417 | 0.038 |
| MAP3K20    | 0 | 0.983700759 | 0.489 | 0.048 |
| H2AFY      | 0 | 0.981459444 | 0.845 | 0.284 |
| NOCT       | 0 | 0.980054648 | 0.658 | 0.178 |
| ALOX5      | 0 | 0.979363521 | 0.675 | 0.093 |
| NCR3LG1    | 0 | 0.97541896  | 0.563 | 0.035 |
| TBC1D12    | 0 | 0.975370498 | 0.444 | 0.039 |
| CREG1      | 0 | 0.974756167 | 0.629 | 0.108 |
| TANC2      | 0 | 0.974352353 | 0.517 | 0.102 |
| SNX81      | 0 | 0.974157411 | 0.739 | 0.174 |
| RTN4       | 0 | 0.972440304 | 0.923 | 0.469 |
| IL13RA11   | 0 | 0.971135058 | 0.704 | 0.089 |
| WDFY3      | 0 | 0.970059317 | 0.598 | 0.033 |
| SHB        | 0 | 0.964294218 | 0.503 | 0.043 |
| ATP2C1     | 0 | 0.964279359 | 0.696 | 0.288 |
| HEXA1      | 0 | 0.962194092 | 0.67  | 0.236 |
| PRMT9      | 0 | 0.960566888 | 0.647 | 0.205 |
| ATP6V1B2   | 0 | 0.960340775 | 0.704 | 0.122 |
| PHLDA2     | 0 | 0.958363033 | 0.539 | 0.078 |
| DNAH17     | 0 | 0.958182123 | 0.432 | 0.02  |
| PKM1       | 0 | 0.954277779 | 0.881 | 0.388 |
| ZFH3       | 0 | 0.954119405 | 0.633 | 0.078 |

|           |   |             |       |       |
|-----------|---|-------------|-------|-------|
| CD80      | 0 | 0.947443541 | 0.469 | 0.083 |
| VSIG4     | 0 | 0.94577878  | 0.399 | 0.017 |
| ETV3      | 0 | 0.945122373 | 0.654 | 0.142 |
| GNA121    | 0 | 0.943002042 | 0.786 | 0.245 |
| PITPNA    | 0 | 0.941187435 | 0.758 | 0.217 |
| MYOF      | 0 | 0.940468311 | 0.502 | 0.044 |
| VDR1      | 0 | 0.939879484 | 0.604 | 0.107 |
| FCGR2B1   | 0 | 0.935610389 | 0.532 | 0.098 |
| GNA15     | 0 | 0.935514891 | 0.707 | 0.131 |
| CYFIP1    | 0 | 0.934222853 | 0.633 | 0.063 |
| NRIP11    | 0 | 0.932603385 | 0.715 | 0.239 |
| LINC00278 | 0 | 0.931898187 | 0.303 | 0.08  |
| HLA-DMB1  | 0 | 0.93116308  | 0.743 | 0.202 |
| CLEC5A    | 0 | 0.928604472 | 0.365 | 0.014 |
| MITF      | 0 | 0.927559663 | 0.389 | 0.022 |
| MIR3945HG | 0 | 0.926511313 | 0.418 | 0.015 |
| GNS       | 0 | 0.926455295 | 0.686 | 0.131 |
| ADAM9     | 0 | 0.92599702  | 0.599 | 0.08  |
| ARHGAP18  | 0 | 0.924418925 | 0.738 | 0.222 |
| YWHAH     | 0 | 0.923996548 | 0.647 | 0.25  |
| PHF19     | 0 | 0.923800775 | 0.51  | 0.125 |
| LACTB     | 0 | 0.923089222 | 0.71  | 0.122 |
| TMEM51    | 0 | 0.921331394 | 0.483 | 0.021 |
| HIP1      | 0 | 0.920304643 | 0.575 | 0.142 |
| KDM6B1    | 0 | 0.919144556 | 0.866 | 0.276 |
| PPP1R15B  | 0 | 0.91895199  | 0.766 | 0.223 |
| DOCK5     | 0 | 0.918185694 | 0.625 | 0.075 |
| ARL5B     | 0 | 0.917540368 | 0.619 | 0.117 |
| RAC1      | 0 | 0.916901304 | 0.919 | 0.513 |
| ATF61     | 0 | 0.916153869 | 0.833 | 0.399 |
| ATP6V1F   | 0 | 0.916034317 | 0.82  | 0.384 |
| PEAK11    | 0 | 0.913020113 | 0.689 | 0.208 |
| IL10      | 0 | 0.911135386 | 0.346 | 0.025 |
| SNTB1     | 0 | 0.909453292 | 0.399 | 0.078 |
| PAK11     | 0 | 0.907275135 | 0.691 | 0.146 |
| NOTCH2NLC | 0 | 0.906166354 | 0.523 | 0.067 |
| LONRF3    | 0 | 0.905520341 | 0.382 | 0.042 |
| STK10     | 0 | 0.904738948 | 0.837 | 0.433 |
| LAIR1     | 0 | 0.903192207 | 0.608 | 0.075 |
| PHACTR4   | 0 | 0.900554785 | 0.616 | 0.261 |
| ZNF804A   | 0 | 0.895752728 | 0.412 | 0.052 |
| CEP1701   | 0 | 0.895075356 | 0.767 | 0.211 |
| CSTB      | 0 | 0.894086958 | 0.841 | 0.397 |

|            |   |             |       |       |
|------------|---|-------------|-------|-------|
| PDGFC      | 0 | 0.893557907 | 0.372 | 0.022 |
| SLC15A3    | 0 | 0.893354408 | 0.622 | 0.043 |
| EFHD2      | 0 | 0.889896396 | 0.855 | 0.315 |
| RUNX1      | 0 | 0.887164083 | 0.896 | 0.492 |
| CTNNA1     | 0 | 0.886432466 | 0.745 | 0.183 |
| AL512603.2 | 0 | 0.882827417 | 0.373 | 0.052 |
| ST3GAL6    | 0 | 0.882254096 | 0.448 | 0.022 |
| GABARAP    | 0 | 0.880860621 | 0.902 | 0.56  |
| ZNF710     | 0 | 0.88083882  | 0.6   | 0.096 |
| SPRED2     | 0 | 0.874418651 | 0.542 | 0.102 |
| KLF10      | 0 | 0.872287251 | 0.627 | 0.097 |
| JDP2       | 0 | 0.87106344  | 0.529 | 0.046 |
| ZNF516     | 0 | 0.868372348 | 0.51  | 0.047 |
| SMIM25     | 0 | 0.86777959  | 0.497 | 0.022 |
| GRINA      | 0 | 0.865908561 | 0.632 | 0.073 |
| KCNE1      | 0 | 0.864769004 | 0.361 | 0.015 |
| ATP6V0B    | 0 | 0.862033541 | 0.805 | 0.334 |
| TSC22D21   | 0 | 0.860998227 | 0.795 | 0.333 |
| HNRNPC     | 0 | 0.860300536 | 0.987 | 0.841 |
| ZFC3H1     | 0 | 0.860147232 | 0.829 | 0.336 |
| C9orf721   | 0 | 0.859146014 | 0.748 | 0.222 |
| ADM        | 0 | 0.857952651 | 0.45  | 0.036 |
| LILRB4     | 0 | 0.855322539 | 0.534 | 0.032 |
| RP2        | 0 | 0.855209255 | 0.6   | 0.094 |
| MGLL       | 0 | 0.853943255 | 0.4   | 0.05  |
| HEXB       | 0 | 0.851715471 | 0.677 | 0.127 |
| RTN1       | 0 | 0.851050174 | 0.389 | 0.014 |
| ATG7       | 0 | 0.849894878 | 0.802 | 0.316 |
| SLC7A7     | 0 | 0.84818308  | 0.556 | 0.041 |
| PLAU       | 0 | 0.845203023 | 0.43  | 0.028 |
| BAZ1A      | 0 | 0.841993537 | 0.915 | 0.501 |
| MCOLN21    | 0 | 0.841978671 | 0.5   | 0.175 |
| KCNQ1      | 0 | 0.841895084 | 0.509 | 0.086 |
| ARPC5      | 0 | 0.840113185 | 0.899 | 0.493 |
| HMOX1      | 0 | 0.838880056 | 0.476 | 0.071 |
| NRIP3      | 0 | 0.838447759 | 0.433 | 0.039 |
| CCDC138    | 0 | 0.837164115 | 0.53  | 0.21  |
| PEA15      | 0 | 0.835978992 | 0.628 | 0.088 |
| FAM20C     | 0 | 0.835371125 | 0.379 | 0.017 |
| GRASP1     | 0 | 0.834893119 | 0.769 | 0.197 |
| PTAFR      | 0 | 0.83376965  | 0.53  | 0.031 |
| PTPN11     | 0 | 0.830784514 | 0.924 | 0.552 |
| LDLR       | 0 | 0.830648545 | 0.585 | 0.151 |

|            |   |             |       |       |
|------------|---|-------------|-------|-------|
| ACSL41     | 0 | 0.829327392 | 0.682 | 0.225 |
| LILRB2     | 0 | 0.829217589 | 0.513 | 0.017 |
| USP121     | 0 | 0.828318353 | 0.793 | 0.36  |
| MPP1       | 0 | 0.82422317  | 0.561 | 0.048 |
| THEMIS21   | 0 | 0.823321159 | 0.725 | 0.146 |
| STK3       | 0 | 0.8227912   | 0.614 | 0.134 |
| CLIC2      | 0 | 0.822254473 | 0.399 | 0.028 |
| ARHGEF2    | 0 | 0.82152037  | 0.621 | 0.107 |
| SUSD6      | 0 | 0.821389965 | 0.81  | 0.33  |
| TUBB61     | 0 | 0.821300214 | 0.659 | 0.116 |
| PIM3       | 0 | 0.817462693 | 0.714 | 0.232 |
| SLCO2B1    | 0 | 0.816232875 | 0.409 | 0.025 |
| LINC01471  | 0 | 0.816009108 | 0.262 | 0.004 |
| RFX2       | 0 | 0.815003889 | 0.551 | 0.117 |
| SLC25A19   | 0 | 0.812970383 | 0.556 | 0.096 |
| RCOR11     | 0 | 0.812860496 | 0.819 | 0.381 |
| MPEG1      | 0 | 0.81212672  | 0.513 | 0.047 |
| RASSF4     | 0 | 0.811973849 | 0.51  | 0.04  |
| RASSF5     | 0 | 0.808917129 | 0.798 | 0.319 |
| DUSP6      | 0 | 0.806112604 | 0.419 | 0.059 |
| YBX31      | 0 | 0.806061345 | 0.839 | 0.228 |
| TNFSF13    | 0 | 0.80552175  | 0.522 | 0.04  |
| PNRC1      | 0 | 0.804911722 | 0.957 | 0.761 |
| PLSCR2     | 0 | 0.804134274 | 0.277 | 0.013 |
| PKIB       | 0 | 0.803362015 | 0.3   | 0.024 |
| EHD1       | 0 | 0.803330715 | 0.686 | 0.248 |
| TNFRSF1B1  | 0 | 0.801561448 | 0.901 | 0.422 |
| APP1       | 0 | 0.799622051 | 0.589 | 0.151 |
| CCRL2      | 0 | 0.798681198 | 0.5   | 0.028 |
| ATP2B1-AS1 | 0 | 0.798526731 | 0.661 | 0.202 |
| SERPINB9   | 0 | 0.797798597 | 0.919 | 0.574 |
| PSEN1      | 0 | 0.797046229 | 0.836 | 0.375 |
| GPR132     | 0 | 0.794749525 | 0.819 | 0.282 |
| VAV2       | 0 | 0.793540098 | 0.444 | 0.073 |
| RGL1       | 0 | 0.792670864 | 0.413 | 0.036 |
| HOMER11    | 0 | 0.79252711  | 0.506 | 0.174 |
| SLC8B1     | 0 | 0.791179727 | 0.512 | 0.086 |
| RASSF3     | 0 | 0.789361363 | 0.721 | 0.268 |
| ATP1B1     | 0 | 0.789311862 | 0.537 | 0.132 |
| ACER3      | 0 | 0.78918532  | 0.658 | 0.171 |
| CTNNBL1    | 0 | 0.787094539 | 0.62  | 0.237 |
| PRKCE1     | 0 | 0.786940007 | 0.839 | 0.37  |
| CHMP1B     | 0 | 0.784214909 | 0.771 | 0.324 |

|             |   |             |       |       |
|-------------|---|-------------|-------|-------|
| CTSC1       | 0 | 0.783647824 | 0.817 | 0.396 |
| GBP1        | 0 | 0.78192847  | 0.497 | 0.155 |
| MAN2B1      | 0 | 0.780058778 | 0.689 | 0.148 |
| SNX101      | 0 | 0.779859757 | 0.685 | 0.158 |
| BLVRB       | 0 | 0.77924903  | 0.627 | 0.129 |
| UBE2R2      | 0 | 0.779141444 | 0.816 | 0.353 |
| SRC         | 0 | 0.77794701  | 0.481 | 0.03  |
| PIK3R6      | 0 | 0.77742917  | 0.431 | 0.034 |
| CPEB4       | 0 | 0.776836674 | 0.763 | 0.269 |
| CD581       | 0 | 0.776424966 | 0.834 | 0.354 |
| OSM         | 0 | 0.776051524 | 0.437 | 0.03  |
| CANX        | 0 | 0.774467575 | 0.833 | 0.346 |
| CD302       | 0 | 0.773986567 | 0.61  | 0.108 |
| EIF4E       | 0 | 0.773605327 | 0.709 | 0.294 |
| ZC3H12C1    | 0 | 0.772905326 | 0.516 | 0.105 |
| AP1S2       | 0 | 0.772788723 | 0.662 | 0.168 |
| LILRB3      | 0 | 0.772339359 | 0.523 | 0.022 |
| PYCARD      | 0 | 0.768013739 | 0.69  | 0.232 |
| CLIP2       | 0 | 0.767597419 | 0.361 | 0.055 |
| TTYH3       | 0 | 0.767298331 | 0.521 | 0.061 |
| XYLT11      | 0 | 0.766957668 | 0.764 | 0.385 |
| TLR4        | 0 | 0.766731788 | 0.466 | 0.02  |
| VAMP8       | 0 | 0.766404756 | 0.825 | 0.451 |
| TRPS12      | 0 | 0.765934665 | 0.855 | 0.449 |
| CERS6       | 0 | 0.76390112  | 0.621 | 0.202 |
| HK2         | 0 | 0.762647647 | 0.417 | 0.038 |
| HNMT        | 0 | 0.762012202 | 0.495 | 0.024 |
| C3AR1       | 0 | 0.759979239 | 0.551 | 0.067 |
| CD36        | 0 | 0.758700564 | 0.338 | 0.016 |
| PDE8A1      | 0 | 0.757257465 | 0.693 | 0.261 |
| GADD45B     | 0 | 0.757135663 | 0.882 | 0.428 |
| IQCJ-SCHIP1 | 0 | 0.757025573 | 0.321 | 0.015 |
| AHR2        | 0 | 0.756820602 | 0.821 | 0.357 |
| AGPAT4      | 0 | 0.756544083 | 0.683 | 0.254 |
| KLF71       | 0 | 0.756418424 | 0.573 | 0.141 |
| SDCBP       | 0 | 0.755864507 | 0.943 | 0.536 |
| CSTA        | 0 | 0.754258239 | 0.597 | 0.066 |
| SVIL        | 0 | 0.753700238 | 0.505 | 0.096 |
| VASP        | 0 | 0.751630578 | 0.812 | 0.3   |
| CYP1B1      | 0 | 0.75146152  | 0.268 | 0.008 |
| SOAT1       | 0 | 0.750747656 | 0.624 | 0.17  |
| ERI2        | 0 | 0.750462939 | 0.277 | 0.021 |
| SLC31A2     | 0 | 0.750231182 | 0.54  | 0.044 |

|            |   |             |       |       |
|------------|---|-------------|-------|-------|
| CPNE8      | 0 | 0.749033937 | 0.487 | 0.071 |
| ACP5       | 0 | 0.748876435 | 0.511 | 0.174 |
| EPB41L2    | 0 | 0.745363465 | 0.532 | 0.127 |
| SEMA3C     | 0 | 0.744284858 | 0.27  | 0.02  |
| RAB32      | 0 | 0.743270059 | 0.512 | 0.03  |
| TNFRSF10B  | 0 | 0.742671337 | 0.584 | 0.146 |
| ADAMTSL4-A | 0 | 0.741815287 | 0.799 | 0.304 |
| CHST15     | 0 | 0.741443266 | 0.456 | 0.085 |
| DAB2       | 0 | 0.74061434  | 0.408 | 0.031 |
| OPN3       | 0 | 0.738763628 | 0.458 | 0.046 |
| N4BP1      | 0 | 0.738761549 | 0.809 | 0.397 |
| TFDP1      | 0 | 0.738123464 | 0.559 | 0.118 |
| CD300A     | 0 | 0.738055568 | 0.513 | 0.054 |
| GNA131     | 0 | 0.737817056 | 0.863 | 0.419 |
| CLEC12A    | 0 | 0.736122302 | 0.395 | 0.016 |
| PLD3       | 0 | 0.73569833  | 0.488 | 0.126 |
| SSH11      | 0 | 0.734357218 | 0.634 | 0.167 |
| PPM1L      | 0 | 0.731795505 | 0.406 | 0.089 |
| PLEKHB2    | 0 | 0.731157175 | 0.774 | 0.283 |
| SMIM3      | 0 | 0.730548084 | 0.516 | 0.067 |
| STAB1      | 0 | 0.730324078 | 0.4   | 0.021 |
| PHLDB1     | 0 | 0.729992747 | 0.398 | 0.019 |
| TSPO       | 0 | 0.729260953 | 0.795 | 0.424 |
| EPAS1      | 0 | 0.728225311 | 0.478 | 0.109 |
| CSF3R      | 0 | 0.727605172 | 0.508 | 0.025 |
| RNASE61    | 0 | 0.726712133 | 0.554 | 0.097 |
| TXN        | 0 | 0.726400327 | 0.847 | 0.457 |
| PPT1       | 0 | 0.72620181  | 0.648 | 0.16  |
| NIBAN2     | 0 | 0.724483679 | 0.445 | 0.022 |
| DHX34      | 0 | 0.72383548  | 0.52  | 0.098 |
| LAP3       | 0 | 0.723049408 | 0.745 | 0.294 |
| GTF2IRD1   | 0 | 0.722819224 | 0.298 | 0.019 |
| UBE2D1     | 0 | 0.722561834 | 0.693 | 0.216 |
| TNIP1      | 0 | 0.722278979 | 0.726 | 0.273 |
| PLIN22     | 0 | 0.721810841 | 0.76  | 0.348 |
| UBE2E11    | 0 | 0.719650796 | 0.694 | 0.251 |
| ARHGAP22   | 0 | 0.717627275 | 0.39  | 0.02  |
| ATP6V0D1   | 0 | 0.716918217 | 0.798 | 0.262 |
| RAB10      | 0 | 0.715742194 | 0.874 | 0.467 |
| LPCAT1     | 0 | 0.715215898 | 0.63  | 0.13  |
| PABPC4     | 0 | 0.714663103 | 0.77  | 0.289 |
| RHEB       | 0 | 0.714102341 | 0.84  | 0.383 |
| IFNGR1     | 0 | 0.714067546 | 0.786 | 0.256 |



|            |   |             |       |       |
|------------|---|-------------|-------|-------|
| ARRB2      | 0 | 0.713962097 | 0.709 | 0.149 |
| ENG        | 0 | 0.710783866 | 0.534 | 0.054 |
| SHTN1      | 0 | 0.710646498 | 0.488 | 0.031 |
| PHC2       | 0 | 0.708172263 | 0.585 | 0.101 |
| ABHD12     | 0 | 0.707846193 | 0.611 | 0.171 |
| PTEN       | 0 | 0.707509837 | 0.843 | 0.393 |
| SCUBE2     | 0 | 0.706654064 | 0.254 | 0.006 |
| MYO1E1     | 0 | 0.706587284 | 0.593 | 0.165 |
| EMP1       | 0 | 0.703232494 | 0.315 | 0.058 |
| MIR222HG   | 0 | 0.702857536 | 0.379 | 0.059 |
| GAS2L3     | 0 | 0.702138629 | 0.383 | 0.018 |
| LINC01010  | 0 | 0.701792159 | 0.31  | 0.021 |
| NEDD4L     | 0 | 0.701667942 | 0.406 | 0.081 |
| METRNL1    | 0 | 0.70013013  | 0.848 | 0.301 |
| AL138720.1 | 0 | 0.69922274  | 0.464 | 0.079 |
| ABTB21     | 0 | 0.699196339 | 0.468 | 0.166 |
| GASK1B     | 0 | 0.697604265 | 0.4   | 0.014 |
| STK40      | 0 | 0.696994034 | 0.617 | 0.149 |
| FAM102B1   | 0 | 0.696759327 | 0.694 | 0.237 |
| LYN1       | 0 | 0.696112253 | 0.93  | 0.326 |
| AC126696.1 | 0 | 0.69534575  | 0.399 | 0.06  |
| EMP3       | 0 | 0.694528938 | 0.856 | 0.462 |
| SNAI1      | 0 | 0.693970977 | 0.435 | 0.035 |
| ZNF385A    | 0 | 0.691074062 | 0.491 | 0.027 |
| HES1       | 0 | 0.690856537 | 0.413 | 0.076 |
| SLC39A11   | 0 | 0.690144487 | 0.617 | 0.227 |
| LPCAT2     | 0 | 0.686270409 | 0.472 | 0.027 |
| ATP6V1C1   | 0 | 0.685970922 | 0.604 | 0.133 |
| BTBD7      | 0 | 0.684032635 | 0.627 | 0.235 |
| FHIT       | 0 | 0.682357545 | 0.44  | 0.139 |
| EDEM11     | 0 | 0.681410386 | 0.685 | 0.213 |
| NQO2       | 0 | 0.681231706 | 0.563 | 0.09  |
| MTSS11     | 0 | 0.680697443 | 0.565 | 0.211 |
| QSOX1      | 0 | 0.677203586 | 0.548 | 0.082 |
| SRGAP21    | 0 | 0.677172492 | 0.669 | 0.241 |
| AC106865.2 | 0 | 0.677140054 | 0.344 | 0.015 |
| TPP1       | 0 | 0.676273482 | 0.689 | 0.173 |
| GPX4       | 0 | 0.676184884 | 0.842 | 0.456 |
| ENPP2      | 0 | 0.676063036 | 0.315 | 0.042 |
| SLC22A4    | 0 | 0.674187638 | 0.371 | 0.012 |
| PNPLA8     | 0 | 0.674044592 | 0.825 | 0.392 |
| TP53BP21   | 0 | 0.674034688 | 0.732 | 0.259 |
| RAB1A      | 0 | 0.673846892 | 0.918 | 0.481 |

|            |   |             |       |       |
|------------|---|-------------|-------|-------|
| ATP6AP1    | 0 | 0.673194559 | 0.633 | 0.125 |
| PIK3CB     | 0 | 0.6715795   | 0.539 | 0.162 |
| TKT        | 0 | 0.670786094 | 0.765 | 0.284 |
| PLEKHG2    | 0 | 0.670492486 | 0.616 | 0.171 |
| BTK1       | 0 | 0.67007564  | 0.48  | 0.107 |
| EIF2AK31   | 0 | 0.66881887  | 0.755 | 0.336 |
| SEC24A     | 0 | 0.666993114 | 0.581 | 0.169 |
| GNB4       | 0 | 0.666274444 | 0.534 | 0.081 |
| IDO2       | 0 | 0.666129164 | 0.36  | 0.016 |
| IL1RAP     | 0 | 0.664879135 | 0.587 | 0.122 |
| AC090617.5 | 0 | 0.664701955 | 0.401 | 0.021 |
| GM2A       | 0 | 0.662264102 | 0.522 | 0.088 |
| SIGLEC10   | 0 | 0.661332911 | 0.42  | 0.037 |
| GSTP1      | 0 | 0.659387252 | 0.864 | 0.431 |
| ELF2       | 0 | 0.658940996 | 0.796 | 0.388 |
| DPYSL2     | 0 | 0.657990204 | 0.593 | 0.105 |
| RBBP81     | 0 | 0.65629621  | 0.559 | 0.171 |
| SAP30      | 0 | 0.655290423 | 0.558 | 0.136 |
| SLC25A13   | 0 | 0.652797296 | 0.545 | 0.146 |
| GLIPR2     | 0 | 0.652718899 | 0.63  | 0.146 |
| AFF41      | 0 | 0.652242913 | 0.917 | 0.534 |
| GNAI2      | 0 | 0.651482838 | 0.883 | 0.52  |
| CHML       | 0 | 0.651464224 | 0.454 | 0.061 |
| ERGIC11    | 0 | 0.651208184 | 0.728 | 0.245 |
| CLEC4A     | 0 | 0.651190496 | 0.443 | 0.031 |
| TUBB       | 0 | 0.651122903 | 0.696 | 0.251 |
| ADA2       | 0 | 0.649473103 | 0.606 | 0.133 |
| TMEM165    | 0 | 0.649340628 | 0.825 | 0.39  |
| DNAI2      | 0 | 0.646689768 | 0.301 | 0.014 |
| IGF2BP2    | 0 | 0.646030462 | 0.318 | 0.018 |
| FLNA1      | 0 | 0.645770542 | 0.732 | 0.271 |
| THAP2      | 0 | 0.645345842 | 0.488 | 0.065 |
| SDCCAG81   | 0 | 0.644798141 | 0.685 | 0.217 |
| TRPM2      | 0 | 0.644147074 | 0.428 | 0.041 |
| CFP        | 0 | 0.642144309 | 0.327 | 0.016 |
| PDLIM5     | 0 | 0.641707619 | 0.598 | 0.172 |
| PARVB1     | 0 | 0.640817642 | 0.715 | 0.212 |
| EIF4A1     | 0 | 0.640655644 | 0.941 | 0.704 |
| NPTN1      | 0 | 0.639986623 | 0.67  | 0.214 |
| DENND1A    | 0 | 0.638021628 | 0.757 | 0.303 |
| ADAM17     | 0 | 0.637851991 | 0.68  | 0.26  |
| LGALS9     | 0 | 0.637197571 | 0.632 | 0.151 |
| HAVCR21    | 0 | 0.63702112  | 0.69  | 0.174 |

|            |   |             |       |       |
|------------|---|-------------|-------|-------|
| PTTG1IP    | 0 | 0.635978698 | 0.685 | 0.192 |
| AF117829.1 | 0 | 0.634643369 | 0.499 | 0.107 |
| MAPKAPK2   | 0 | 0.634538564 | 0.752 | 0.285 |
| SLC6A6     | 0 | 0.633697731 | 0.633 | 0.189 |
| GNB1       | 0 | 0.633399963 | 0.934 | 0.561 |
| ZNF438     | 0 | 0.631393375 | 0.454 | 0.112 |
| SDC4       | 0 | 0.629271368 | 0.452 | 0.054 |
| CPED1      | 0 | 0.628355985 | 0.331 | 0.037 |
| CPEB2      | 0 | 0.628304151 | 0.517 | 0.154 |
| FCGR1A     | 0 | 0.625569812 | 0.361 | 0.015 |
| SLC43A3    | 0 | 0.623691508 | 0.469 | 0.042 |
| NOTCH21    | 0 | 0.62319484  | 0.581 | 0.18  |
| NFKBIE     | 0 | 0.622396161 | 0.527 | 0.08  |
| RREB11     | 0 | 0.621387542 | 0.633 | 0.204 |
| PLBD1      | 0 | 0.621131044 | 0.483 | 0.049 |
| AVPI1      | 0 | 0.621050296 | 0.473 | 0.068 |
| ITGAM      | 0 | 0.62074373  | 0.392 | 0.033 |
| NAV1       | 0 | 0.620449803 | 0.333 | 0.037 |
| SPINT2     | 0 | 0.620191043 | 0.547 | 0.124 |
| SYK1       | 0 | 0.617183601 | 0.671 | 0.152 |
| MPHOSPH6   | 0 | 0.616867059 | 0.633 | 0.152 |
| NRG1       | 0 | 0.615727867 | 0.266 | 0.009 |
| HIVEP11    | 0 | 0.61458592  | 0.795 | 0.382 |
| GLA1       | 0 | 0.613457219 | 0.634 | 0.183 |
| SLC16A3    | 0 | 0.61159472  | 0.696 | 0.217 |
| DST        | 0 | 0.611438962 | 0.354 | 0.053 |
| TBC1D2     | 0 | 0.610742212 | 0.371 | 0.04  |
| SMS        | 0 | 0.610367188 | 0.633 | 0.212 |
| TMCC3      | 0 | 0.610199958 | 0.504 | 0.064 |
| ARHGAP21   | 0 | 0.610124867 | 0.495 | 0.11  |
| GRK31      | 0 | 0.609131724 | 0.566 | 0.16  |
| LINC00243  | 0 | 0.608198712 | 0.252 | 0.037 |
| ZBTB43     | 0 | 0.607781174 | 0.578 | 0.191 |
| FRMD4B1    | 0 | 0.607767958 | 0.54  | 0.171 |
| ERN1       | 0 | 0.607654497 | 0.805 | 0.35  |
| ARRB1      | 0 | 0.60699341  | 0.428 | 0.041 |
| SGPL1      | 0 | 0.604340923 | 0.489 | 0.093 |
| AC135050.3 | 0 | 0.603964202 | 0.325 | 0.027 |
| SIAH1      | 0 | 0.603897359 | 0.52  | 0.102 |
| CTNND1     | 0 | 0.603821196 | 0.536 | 0.111 |
| GPR157     | 0 | 0.603766846 | 0.293 | 0.034 |
| ETF1       | 0 | 0.603577522 | 0.861 | 0.378 |
| FCAR       | 0 | 0.602617448 | 0.257 | 0.007 |

|            |   |             |       |       |
|------------|---|-------------|-------|-------|
| LRP1       | 0 | 0.601933557 | 0.421 | 0.024 |
| GSAP1      | 0 | 0.601924531 | 0.575 | 0.133 |
| LAPTM51    | 0 | 0.600957941 | 0.965 | 0.686 |
| SLAMF8     | 0 | 0.600215658 | 0.415 | 0.022 |
| OSBPL1A    | 0 | 0.59997197  | 0.39  | 0.033 |
| ATOX1      | 0 | 0.597894671 | 0.682 | 0.233 |
| LAMP2      | 0 | 0.597586513 | 0.669 | 0.2   |
| TMEM163    | 0 | 0.596258202 | 0.325 | 0.08  |
| RGS121     | 0 | 0.595456963 | 0.347 | 0.034 |
| AC253572.2 | 0 | 0.594274844 | 0.39  | 0.094 |
| MFSD12     | 0 | 0.592469717 | 0.511 | 0.106 |
| FRY        | 0 | 0.591339159 | 0.369 | 0.055 |
| IL15       | 0 | 0.591179052 | 0.372 | 0.062 |
| RCAN1      | 0 | 0.590346679 | 0.314 | 0.049 |
| GNG10      | 0 | 0.590240886 | 0.655 | 0.171 |
| ZNF277     | 0 | 0.588286318 | 0.552 | 0.187 |
| NFKBID1    | 0 | 0.587761483 | 0.677 | 0.19  |
| NR4A21     | 0 | 0.587156179 | 0.906 | 0.488 |
| FPR2       | 0 | 0.585649017 | 0.252 | 0.008 |
| RAB13      | 0 | 0.585426043 | 0.466 | 0.048 |
| ADAP2      | 0 | 0.585415377 | 0.412 | 0.045 |
| SERPINB6   | 0 | 0.584204317 | 0.609 | 0.106 |
| CLN8       | 0 | 0.583510961 | 0.536 | 0.116 |
| CHKA       | 0 | 0.582964012 | 0.611 | 0.177 |
| SLC25A44   | 0 | 0.580932863 | 0.357 | 0.089 |
| CMTM61     | 0 | 0.58089115  | 0.86  | 0.41  |
| CCR5AS     | 0 | 0.580198617 | 0.365 | 0.022 |
| TREM2      | 0 | 0.580140525 | 0.263 | 0.018 |
| MTHFD1L    | 0 | 0.579992    | 0.481 | 0.139 |
| CCDC200    | 0 | 0.579787243 | 0.366 | 0.065 |
| DDX60L     | 0 | 0.579343687 | 0.529 | 0.192 |
| USP32      | 0 | 0.5778616   | 0.647 | 0.214 |
| CD300LB    | 0 | 0.576784316 | 0.319 | 0.009 |
| KIF13A     | 0 | 0.575950763 | 0.38  | 0.048 |
| SDSL       | 0 | 0.574531138 | 0.41  | 0.017 |
| ZC3H12A    | 0 | 0.572331399 | 0.582 | 0.13  |
| TBC1D91    | 0 | 0.571962108 | 0.473 | 0.11  |
| P2RX4      | 0 | 0.570358589 | 0.528 | 0.107 |
| SLC12A7    | 0 | 0.569763577 | 0.444 | 0.067 |
| AMZ11      | 0 | 0.567961397 | 0.461 | 0.112 |
| GNG5       | 0 | 0.566606239 | 0.84  | 0.457 |
| BCL6       | 0 | 0.56484145  | 0.643 | 0.189 |
| YBX1       | 0 | 0.563946267 | 0.946 | 0.761 |

|            |   |             |       |       |
|------------|---|-------------|-------|-------|
| FAM20A     | 0 | 0.563927677 | 0.257 | 0.023 |
| STXBP2     | 0 | 0.56390396  | 0.583 | 0.156 |
| TNFRSF10D  | 0 | 0.562441887 | 0.438 | 0.119 |
| RAB7B      | 0 | 0.561750051 | 0.314 | 0.011 |
| ACSL5      | 0 | 0.560562377 | 0.515 | 0.122 |
| ATF5       | 0 | 0.559807611 | 0.46  | 0.095 |
| RGS102     | 0 | 0.558446446 | 0.801 | 0.382 |
| YTHDF3     | 0 | 0.554177171 | 0.768 | 0.344 |
| SLC16A6    | 0 | 0.551168459 | 0.312 | 0.034 |
| SAV11      | 0 | 0.550712709 | 0.473 | 0.13  |
| AZIN1      | 0 | 0.548503417 | 0.777 | 0.312 |
| PHLPP11    | 0 | 0.548313017 | 0.543 | 0.206 |
| AGTPBP1    | 0 | 0.54791818  | 0.61  | 0.238 |
| C3         | 0 | 0.546782962 | 0.291 | 0.032 |
| RHBDF21    | 0 | 0.543437556 | 0.643 | 0.175 |
| LINC00654  | 0 | 0.543333819 | 0.281 | 0.049 |
| MAD1L11    | 0 | 0.542929571 | 0.643 | 0.255 |
| SERPINB9P1 | 0 | 0.540960516 | 0.512 | 0.124 |
| MERTK      | 0 | 0.538955018 | 0.3   | 0.04  |
| MEFV       | 0 | 0.538794902 | 0.312 | 0.006 |
| PECAM1     | 0 | 0.538335368 | 0.509 | 0.113 |
| MMP2-AS1   | 0 | 0.537293158 | 0.305 | 0.007 |
| MRAS       | 0 | 0.537260241 | 0.313 | 0.014 |
| CDCA4      | 0 | 0.537194732 | 0.386 | 0.067 |
| IRF81      | 0 | 0.536069803 | 0.663 | 0.202 |
| ATP6AP2    | 0 | 0.535827679 | 0.706 | 0.284 |
| SLC41A2    | 0 | 0.534862999 | 0.405 | 0.111 |
| BTBD19     | 0 | 0.534141102 | 0.412 | 0.051 |
| DOT1L      | 0 | 0.53406086  | 0.455 | 0.08  |
| P2RX7      | 0 | 0.533940382 | 0.3   | 0.035 |
| ATP6V0C    | 0 | 0.533104209 | 0.888 | 0.519 |
| LINC00884  | 0 | 0.533023217 | 0.349 | 0.033 |
| GPAT3      | 0 | 0.532152881 | 0.279 | 0.043 |
| GPR84      | 0 | 0.531809314 | 0.317 | 0.009 |
| KANSL1L    | 0 | 0.531419714 | 0.42  | 0.101 |
| ARHGEF10L  | 0 | 0.531194662 | 0.324 | 0.014 |
| SQOR       | 0 | 0.530701356 | 0.578 | 0.163 |
| SLC37A2    | 0 | 0.530476519 | 0.341 | 0.018 |
| TALDO1     | 0 | 0.530256206 | 0.755 | 0.286 |
| KIFC3      | 0 | 0.529904077 | 0.376 | 0.031 |
| C1orf54    | 0 | 0.528299149 | 0.377 | 0.043 |
| PXDC1      | 0 | 0.527856777 | 0.335 | 0.047 |
| HRH2       | 0 | 0.527729716 | 0.385 | 0.028 |

|           |   |             |       |       |
|-----------|---|-------------|-------|-------|
| IL1R2     | 0 | 0.526824837 | 0.457 | 0.107 |
| VASH1     | 0 | 0.524449504 | 0.396 | 0.035 |
| FCHO2     | 0 | 0.524237949 | 0.414 | 0.075 |
| C2orf92   | 0 | 0.522281509 | 0.274 | 0.036 |
| ASTL      | 0 | 0.519937637 | 0.359 | 0.076 |
| OAZ2      | 0 | 0.519377142 | 0.494 | 0.096 |
| PDE2A     | 0 | 0.519092238 | 0.309 | 0.019 |
| SEC24D    | 0 | 0.51894437  | 0.562 | 0.18  |
| DNMBP1    | 0 | 0.518528181 | 0.494 | 0.115 |
| ANKDD1A   | 0 | 0.51784905  | 0.32  | 0.046 |
| C19orf38  | 0 | 0.51777487  | 0.383 | 0.041 |
| RNH1      | 0 | 0.517358955 | 0.736 | 0.298 |
| MDC1      | 0 | 0.516953154 | 0.268 | 0.064 |
| SMOX      | 0 | 0.516892228 | 0.307 | 0.02  |
| MMP14     | 0 | 0.513307851 | 0.355 | 0.019 |
| JAML1     | 0 | 0.51112028  | 0.549 | 0.186 |
| MFSD2A    | 0 | 0.510021548 | 0.325 | 0.026 |
| PLBD2     | 0 | 0.509945313 | 0.393 | 0.043 |
| ST14      | 0 | 0.509099907 | 0.419 | 0.05  |
| GAA       | 0 | 0.507146309 | 0.448 | 0.052 |
| ANKRD22   | 0 | 0.506519616 | 0.287 | 0.017 |
| GPATCH2L  | 0 | 0.506349355 | 0.598 | 0.204 |
| KCTD20    | 0 | 0.505439009 | 0.627 | 0.215 |
| TES       | 0 | 0.505298457 | 0.69  | 0.264 |
| LY96      | 0 | 0.504879374 | 0.573 | 0.139 |
| PRCP1     | 0 | 0.504729978 | 0.565 | 0.17  |
| BAIAP2    | 0 | 0.504579331 | 0.386 | 0.064 |
| CTTNBP2NL | 0 | 0.504156334 | 0.384 | 0.052 |
| SESN2     | 0 | 0.50407744  | 0.457 | 0.109 |
| TENT5A    | 0 | 0.503325901 | 0.387 | 0.094 |
| TNFRSF1A  | 0 | 0.502924995 | 0.481 | 0.059 |
| ALDH1A2   | 0 | 0.501118975 | 0.308 | 0.019 |
| RELT      | 0 | 0.5010868   | 0.499 | 0.09  |
| SLC11A2   | 0 | 0.500693209 | 0.476 | 0.101 |
| LILRA5    | 0 | 0.500600644 | 0.289 | 0.011 |
| PLEKHO11  | 0 | 0.500418881 | 0.647 | 0.223 |
| TRIM25    | 0 | 0.499499981 | 0.453 | 0.152 |
| P4HB      | 0 | 0.499119532 | 0.741 | 0.315 |
| SLC66A2   | 0 | 0.498985642 | 0.588 | 0.158 |
| NAGK      | 0 | 0.498345641 | 0.479 | 0.156 |
| PDGFB     | 0 | 0.498007165 | 0.251 | 0.017 |
| CDK141    | 0 | 0.497346266 | 0.709 | 0.291 |
| SPHK1     | 0 | 0.495768324 | 0.348 | 0.018 |

|            |   |             |       |       |
|------------|---|-------------|-------|-------|
| AC011511.2 | 0 | 0.495557515 | 0.398 | 0.048 |
| SPDYA      | 0 | 0.49304371  | 0.499 | 0.165 |
| OSCAR      | 0 | 0.493011274 | 0.381 | 0.019 |
| SECTM1     | 0 | 0.492658839 | 0.387 | 0.024 |
| EAF1       | 0 | 0.492263658 | 0.426 | 0.096 |
| NCEH1      | 0 | 0.48949074  | 0.358 | 0.06  |
| ANO6       | 0 | 0.489431983 | 0.553 | 0.19  |
| PGD        | 0 | 0.489373372 | 0.545 | 0.106 |
| RXRA       | 0 | 0.48872162  | 0.387 | 0.04  |
| LRRK2      | 0 | 0.487926694 | 0.371 | 0.053 |
| PPFIA1     | 0 | 0.486612594 | 0.62  | 0.219 |
| ITPRIP1    | 0 | 0.486102516 | 0.577 | 0.162 |
| OTUD11     | 0 | 0.485215928 | 0.553 | 0.195 |
| PGS1       | 0 | 0.483088051 | 0.468 | 0.098 |
| PLEKHM21   | 0 | 0.482718726 | 0.62  | 0.2   |
| RHOA       | 0 | 0.482630829 | 0.276 | 0.017 |
| AHRR       | 0 | 0.477897708 | 0.281 | 0.038 |
| AC002091.1 | 0 | 0.477325681 | 0.285 | 0.014 |
| TULP2      | 0 | 0.477272951 | 0.442 | 0.119 |
| PURB       | 0 | 0.477121286 | 0.531 | 0.131 |
| SH3BP2     | 0 | 0.475201835 | 0.463 | 0.076 |
| STX4       | 0 | 0.474159452 | 0.575 | 0.155 |
| IPMK       | 0 | 0.473670298 | 0.532 | 0.157 |
| SRA1       | 0 | 0.472838464 | 0.647 | 0.246 |
| KDM7A      | 0 | 0.472491023 | 0.558 | 0.2   |
| ARAP1      | 0 | 0.472480787 | 0.506 | 0.096 |
| VSIR1      | 0 | 0.471640107 | 0.637 | 0.236 |
| RUFY3      | 0 | 0.471167392 | 0.458 | 0.12  |
| SKAP21     | 0 | 0.469442252 | 0.744 | 0.259 |
| CTSA       | 0 | 0.468345262 | 0.579 | 0.191 |
| EVI51      | 0 | 0.467857172 | 0.567 | 0.166 |
| RRBP1      | 0 | 0.466713404 | 0.689 | 0.223 |
| M6PR       | 0 | 0.466187528 | 0.692 | 0.256 |
| TBC1D30    | 0 | 0.465434343 | 0.253 | 0.011 |
| NEK6       | 0 | 0.464904491 | 0.42  | 0.065 |
| SLC2A9     | 0 | 0.463761706 | 0.308 | 0.025 |
| ARSB       | 0 | 0.463693086 | 0.43  | 0.128 |
| EEPD1      | 0 | 0.463308327 | 0.354 | 0.09  |
| LAMP1      | 0 | 0.462635844 | 0.675 | 0.273 |
| ACAT2      | 0 | 0.462530682 | 0.508 | 0.156 |
| AC139099.2 | 0 | 0.461968134 | 0.311 | 0.016 |
| SCARB2     | 0 | 0.461141857 | 0.483 | 0.116 |
| IL1R11     | 0 | 0.459490141 | 0.535 | 0.132 |

|             |   |             |       |       |
|-------------|---|-------------|-------|-------|
| IL10RB      | 0 | 0.459396386 | 0.57  | 0.157 |
| LINC00877   | 0 | 0.458576595 | 0.275 | 0.034 |
| SERPING1    | 0 | 0.458324789 | 0.327 | 0.035 |
| NPL         | 0 | 0.457846354 | 0.375 | 0.062 |
| DUSP3       | 0 | 0.456248771 | 0.405 | 0.039 |
| RIPOR3      | 0 | 0.45429479  | 0.337 | 0.076 |
| IRF2BP2     | 0 | 0.453791045 | 0.693 | 0.255 |
| WBP1L       | 0 | 0.451476628 | 0.483 | 0.112 |
| FES         | 0 | 0.450695305 | 0.403 | 0.046 |
| AKR1A1      | 0 | 0.450609894 | 0.601 | 0.209 |
| CNTLN       | 0 | 0.450205012 | 0.341 | 0.031 |
| SIPA1L2     | 0 | 0.450073027 | 0.387 | 0.051 |
| SLC45A4     | 0 | 0.449925946 | 0.412 | 0.133 |
| TBK1        | 0 | 0.449836718 | 0.656 | 0.265 |
| SPART       | 0 | 0.449533606 | 0.491 | 0.092 |
| CHSY1       | 0 | 0.44742735  | 0.492 | 0.15  |
| FHAD1       | 0 | 0.446559662 | 0.286 | 0.024 |
| PRPSAP1     | 0 | 0.446171881 | 0.395 | 0.093 |
| SLC31A1     | 0 | 0.445383628 | 0.389 | 0.051 |
| CAMKK2      | 0 | 0.445374657 | 0.352 | 0.064 |
| MOB3A1      | 0 | 0.445190293 | 0.728 | 0.312 |
| CNDP2       | 0 | 0.444875289 | 0.588 | 0.185 |
| SIGLEC9     | 0 | 0.444555573 | 0.333 | 0.014 |
| LSS         | 0 | 0.444247279 | 0.27  | 0.062 |
| CPPED1      | 0 | 0.443990911 | 0.468 | 0.084 |
| DENND31     | 0 | 0.443289622 | 0.551 | 0.15  |
| SMCO4       | 0 | 0.441497309 | 0.454 | 0.079 |
| AATK        | 0 | 0.439929819 | 0.304 | 0.03  |
| LAT21       | 0 | 0.438849842 | 0.579 | 0.145 |
| BCL3        | 0 | 0.438423259 | 0.546 | 0.137 |
| BAZ2B       | 0 | 0.438418793 | 0.661 | 0.258 |
| RNF149      | 0 | 0.438390032 | 0.896 | 0.48  |
| ABCC3       | 0 | 0.437741498 | 0.259 | 0.012 |
| SPATC1      | 0 | 0.437632071 | 0.264 | 0.008 |
| MAP3K13     | 0 | 0.43762001  | 0.474 | 0.153 |
| SRGAP2B     | 0 | 0.43755247  | 0.431 | 0.112 |
| LACC1       | 0 | 0.437112511 | 0.318 | 0.028 |
| CYB5D1      | 0 | 0.437004972 | 0.316 | 0.031 |
| COMT        | 0 | 0.436235547 | 0.612 | 0.187 |
| ATG3        | 0 | 0.435422284 | 0.687 | 0.253 |
| ARID3A      | 0 | 0.433763769 | 0.353 | 0.072 |
| SLC8A1-AS1  | 0 | 0.433631578 | 0.291 | 0.015 |
| AC013652.11 | 0 | 0.433568198 | 0.35  | 0.094 |



|            |   |             |       |       |
|------------|---|-------------|-------|-------|
| AC040970.1 | 0 | 0.432600289 | 0.312 | 0.034 |
| LAMTOR2    | 0 | 0.431948321 | 0.604 | 0.216 |
| MSRA       | 0 | 0.431670281 | 0.535 | 0.151 |
| ZYX        | 0 | 0.431076703 | 0.547 | 0.124 |
| CAMSAP2    | 0 | 0.430101704 | 0.295 | 0.033 |
| UBAP1      | 0 | 0.428658418 | 0.722 | 0.316 |
| ASPH       | 0 | 0.426361649 | 0.464 | 0.123 |
| PLEC       | 0 | 0.425292919 | 0.556 | 0.161 |
| TBC1D7     | 0 | 0.424852286 | 0.418 | 0.076 |
| CD42       | 0 | 0.424592733 | 0.645 | 0.196 |
| TMEM273    | 0 | 0.424379571 | 0.378 | 0.072 |
| CD401      | 0 | 0.423940053 | 0.429 | 0.118 |
| SPECC1     | 0 | 0.423202698 | 0.332 | 0.047 |
| HSBP1      | 0 | 0.422629053 | 0.662 | 0.236 |
| TRIB1      | 0 | 0.422617764 | 0.464 | 0.111 |
| NOD2       | 0 | 0.420888872 | 0.303 | 0.023 |
| HES4       | 0 | 0.419522569 | 0.325 | 0.067 |
| ADCY3      | 0 | 0.419318094 | 0.383 | 0.116 |
| GNB2       | 0 | 0.419055124 | 0.699 | 0.243 |
| SSBP3      | 0 | 0.418930175 | 0.414 | 0.122 |
| LINC00641  | 0 | 0.41802032  | 0.348 | 0.047 |
| CAMK1      | 0 | 0.417613563 | 0.32  | 0.043 |
| CASP10     | 0 | 0.416966066 | 0.335 | 0.089 |
| NAIP       | 0 | 0.415854605 | 0.409 | 0.061 |
| ATP11A     | 0 | 0.415665162 | 0.525 | 0.164 |
| ZBTB46     | 0 | 0.413257766 | 0.28  | 0.049 |
| PLIN3      | 0 | 0.411868329 | 0.492 | 0.109 |
| CD9        | 0 | 0.411642491 | 0.429 | 0.11  |
| SAMHD12    | 0 | 0.410634596 | 0.786 | 0.337 |
| SLC25A51   | 0 | 0.409828935 | 0.367 | 0.087 |
| RBKS       | 0 | 0.409023917 | 0.524 | 0.173 |
| LAMB3      | 0 | 0.409018765 | 0.279 | 0.015 |
| CCR1       | 0 | 0.408761743 | 0.311 | 0.047 |
| MGST2      | 0 | 0.40583851  | 0.401 | 0.058 |
| ZFP91      | 0 | 0.405760376 | 0.642 | 0.252 |
| AC008771.1 | 0 | 0.40359702  | 0.402 | 0.092 |
| CDCP1      | 0 | 0.403066615 | 0.292 | 0.016 |
| CASP11     | 0 | 0.402342147 | 0.562 | 0.175 |
| ENOSF1     | 0 | 0.401518074 | 0.455 | 0.15  |
| KIAA0930   | 0 | 0.400961315 | 0.39  | 0.061 |
| AC007952.4 | 0 | 0.400656959 | 0.469 | 0.138 |
| TRAPPC5    | 0 | 0.399811364 | 0.733 | 0.325 |
| AMPD2      | 0 | 0.399644069 | 0.335 | 0.03  |

|            |   |             |       |       |
|------------|---|-------------|-------|-------|
| CLTC       | 0 | 0.39910605  | 0.702 | 0.286 |
| RGS18      | 0 | 0.398380412 | 0.298 | 0.017 |
| AP000763.3 | 0 | 0.397990544 | 0.346 | 0.045 |
| SUSD1      | 0 | 0.39752414  | 0.345 | 0.056 |
| SCO2       | 0 | 0.397458572 | 0.498 | 0.127 |
| SERPINB8   | 0 | 0.396120411 | 0.376 | 0.052 |
| MTF1       | 0 | 0.395498589 | 0.371 | 0.093 |
| SLC36A41   | 0 | 0.394411731 | 0.557 | 0.178 |
| MIR22HG    | 0 | 0.394265991 | 0.386 | 0.059 |
| VPS35      | 0 | 0.39390815  | 0.612 | 0.201 |
| OLFML2B    | 0 | 0.392781652 | 0.254 | 0.013 |
| NUCB1      | 0 | 0.392635682 | 0.619 | 0.226 |
| PLEKHO2    | 0 | 0.391531861 | 0.428 | 0.07  |
| NUDT16     | 0 | 0.391285208 | 0.405 | 0.072 |
| ADAM8      | 0 | 0.390387679 | 0.408 | 0.081 |
| LILRB1     | 0 | 0.389124312 | 0.357 | 0.06  |
| TCIRG1     | 0 | 0.38898239  | 0.57  | 0.159 |
| ZMIZ1-AS1  | 0 | 0.388923811 | 0.254 | 0.012 |
| DISC11     | 0 | 0.38853778  | 0.476 | 0.154 |
| MCOLN1     | 0 | 0.387729434 | 0.376 | 0.061 |
| CYP2S1     | 0 | 0.387353457 | 0.286 | 0.014 |
| CSRNP1     | 0 | 0.386646495 | 0.697 | 0.246 |
| ZNFX1      | 0 | 0.385492037 | 0.629 | 0.245 |
| HS3ST3B11  | 0 | 0.382711548 | 0.453 | 0.153 |
| JAG1       | 0 | 0.38072145  | 0.263 | 0.03  |
| CMKLR1     | 0 | 0.379493003 | 0.25  | 0.013 |
| SIGLEC12   | 0 | 0.379201116 | 0.267 | 0.014 |
| ADCY9      | 0 | 0.379102644 | 0.25  | 0.036 |
| BLOC1S6    | 0 | 0.37880032  | 0.668 | 0.264 |
| SPG21      | 0 | 0.375459488 | 0.517 | 0.127 |
| PRKACA     | 0 | 0.374454578 | 0.401 | 0.064 |
| TCN2       | 0 | 0.373220127 | 0.276 | 0.023 |
| SPATA5L1   | 0 | 0.373155307 | 0.287 | 0.06  |
| LIPA       | 0 | 0.373151276 | 0.387 | 0.117 |
| SLC9A8     | 0 | 0.372431342 | 0.535 | 0.174 |
| HK1        | 0 | 0.371629775 | 0.553 | 0.18  |
| ACOT91     | 0 | 0.371413534 | 0.632 | 0.21  |
| PLK3       | 0 | 0.370863471 | 0.623 | 0.216 |
| MTHFD2     | 0 | 0.369978241 | 0.717 | 0.297 |
| CAPNS1     | 0 | 0.369913109 | 0.642 | 0.212 |
| GZF1       | 0 | 0.369796713 | 0.35  | 0.073 |
| GCA        | 0 | 0.369005165 | 0.516 | 0.132 |
| NFAM1      | 0 | 0.368930209 | 0.287 | 0.024 |

|             |   |             |       |       |
|-------------|---|-------------|-------|-------|
| AC090617.10 | 0 | 0.368384395 | 0.275 | 0.014 |
| BLVRA       | 0 | 0.367515258 | 0.43  | 0.085 |
| ZCCHC14     | 0 | 0.367453908 | 0.362 | 0.078 |
| FKBP15      | 0 | 0.367228678 | 0.432 | 0.093 |
| PLK2        | 0 | 0.36704263  | 0.322 | 0.068 |
| EHD4        | 0 | 0.366240241 | 0.469 | 0.161 |
| CRK         | 0 | 0.364053474 | 0.556 | 0.198 |
| SERPINF1    | 0 | 0.363976257 | 0.273 | 0.041 |
| AP000919.2  | 0 | 0.363102789 | 0.275 | 0.046 |
| CEACAM4     | 0 | 0.362903485 | 0.261 | 0.011 |
| ODF3B       | 0 | 0.362804974 | 0.426 | 0.088 |
| RASSF21     | 0 | 0.362249452 | 0.523 | 0.158 |
| CD721       | 0 | 0.361644119 | 0.502 | 0.137 |
| MAFG        | 0 | 0.360907479 | 0.431 | 0.091 |
| PLAGL1      | 0 | 0.360513031 | 0.394 | 0.104 |
| DDAH2       | 0 | 0.360339304 | 0.479 | 0.108 |
| TCEAL9      | 0 | 0.359908818 | 0.282 | 0.037 |
| NAGA        | 0 | 0.359234142 | 0.356 | 0.043 |
| PTPN9       | 0 | 0.355233447 | 0.35  | 0.102 |
| CD300LF     | 0 | 0.354865798 | 0.252 | 0.014 |
| GAS6        | 0 | 0.351521604 | 0.332 | 0.049 |
| LTBR        | 0 | 0.350436442 | 0.307 | 0.02  |
| PLA2G6      | 0 | 0.349620124 | 0.363 | 0.07  |
| PALLD       | 0 | 0.349558462 | 0.29  | 0.037 |
| BCKDK       | 0 | 0.349340235 | 0.368 | 0.054 |
| SORT1       | 0 | 0.348899499 | 0.286 | 0.022 |
| RRAGD       | 0 | 0.347716156 | 0.304 | 0.032 |
| IL17RA      | 0 | 0.34763587  | 0.479 | 0.155 |
| GOLIM4      | 0 | 0.347633426 | 0.418 | 0.1   |
| ATP6V0A1    | 0 | 0.346737943 | 0.379 | 0.095 |
| SNCA        | 0 | 0.345784319 | 0.264 | 0.026 |
| TATDN2      | 0 | 0.345140331 | 0.357 | 0.094 |
| HGSNAT      | 0 | 0.344906495 | 0.567 | 0.202 |
| TET31       | 0 | 0.344873608 | 0.474 | 0.161 |
| INSR        | 0 | 0.342695219 | 0.33  | 0.086 |
| MIDN        | 0 | 0.340013017 | 0.684 | 0.272 |
| 2-Mar       | 0 | 0.339427466 | 0.443 | 0.103 |
| COLGALT1    | 0 | 0.339379648 | 0.367 | 0.062 |
| RAB34       | 0 | 0.339269166 | 0.366 | 0.047 |
| PNP         | 0 | 0.339251588 | 0.487 | 0.166 |
| CD33        | 0 | 0.33803715  | 0.258 | 0.012 |
| AL355075.4  | 0 | 0.337226994 | 0.263 | 0.043 |
| MYO1F1      | 0 | 0.33679283  | 0.627 | 0.209 |

|            |   |             |       |       |
|------------|---|-------------|-------|-------|
| GRAMD4     | 0 | 0.335102794 | 0.439 | 0.125 |
| FMNL3      | 0 | 0.333133521 | 0.367 | 0.099 |
| XBP1       | 0 | 0.332309081 | 0.75  | 0.286 |
| MTHFR      | 0 | 0.332155081 | 0.3   | 0.067 |
| EHBP1L1    | 0 | 0.332100053 | 0.507 | 0.139 |
| ITPRID2    | 0 | 0.33045476  | 0.349 | 0.068 |
| SCAT1      | 0 | 0.329141854 | 0.25  | 0.034 |
| WDR1       | 0 | 0.3288387   | 0.678 | 0.257 |
| MYO1G      | 0 | 0.328464668 | 0.495 | 0.157 |
| FUOM       | 0 | 0.328247612 | 0.435 | 0.11  |
| UQCRC1     | 0 | 0.327366991 | 0.513 | 0.141 |
| HEIH       | 0 | 0.327134491 | 0.412 | 0.091 |
| MSANTD3    | 0 | 0.325547459 | 0.26  | 0.047 |
| NFIC       | 0 | 0.324863027 | 0.436 | 0.108 |
| AC090559.1 | 0 | 0.324028355 | 0.266 | 0.017 |
| PYGL       | 0 | 0.323719194 | 0.269 | 0.016 |
| SCARB1     | 0 | 0.322081817 | 0.284 | 0.067 |
| CFLAR-AS1  | 0 | 0.320581342 | 0.37  | 0.081 |
| AHCYL1     | 0 | 0.319712352 | 0.48  | 0.153 |
| MKNK1      | 0 | 0.31854377  | 0.457 | 0.126 |
| VPS37C     | 0 | 0.318360903 | 0.259 | 0.029 |
| ALAS1      | 0 | 0.317863547 | 0.3   | 0.079 |
| DBNDD2     | 0 | 0.317679916 | 0.376 | 0.076 |
| METTL7A    | 0 | 0.315893581 | 0.322 | 0.07  |
| UNC93B1    | 0 | 0.315073662 | 0.442 | 0.115 |
| STX3       | 0 | 0.314881757 | 0.314 | 0.036 |
| FLVCR2     | 0 | 0.314089417 | 0.32  | 0.069 |
| FERMT3     | 0 | 0.312281911 | 0.604 | 0.212 |
| NANS       | 0 | 0.31086023  | 0.641 | 0.249 |
| MBOAT7     | 0 | 0.309252029 | 0.436 | 0.099 |
| E2F3       | 0 | 0.30888104  | 0.443 | 0.131 |
| NBPF19     | 0 | 0.308126489 | 0.251 | 0.034 |
| SLC17A5    | 0 | 0.307615672 | 0.332 | 0.092 |
| IL10RB-DT  | 0 | 0.307532733 | 0.262 | 0.019 |
| RHOT1      | 0 | 0.306968892 | 0.396 | 0.111 |
| SPNS1      | 0 | 0.305577944 | 0.371 | 0.075 |
| CYB561A3   | 0 | 0.303864205 | 0.376 | 0.103 |
| ARF3       | 0 | 0.302994464 | 0.498 | 0.14  |
| RIT1       | 0 | 0.302830318 | 0.507 | 0.155 |
| LRRC25     | 0 | 0.301880356 | 0.256 | 0.018 |
| APOBR      | 0 | 0.301636089 | 0.292 | 0.034 |
| ANXA4      | 0 | 0.301629439 | 0.436 | 0.11  |
| FUCA2      | 0 | 0.299743516 | 0.397 | 0.088 |

|            |   |             |       |       |
|------------|---|-------------|-------|-------|
| PTGER2     | 0 | 0.297635735 | 0.283 | 0.052 |
| C20orf194  | 0 | 0.295906835 | 0.352 | 0.094 |
| LGALS3BP   | 0 | 0.294463519 | 0.301 | 0.066 |
| CTIF       | 0 | 0.293648954 | 0.278 | 0.045 |
| AC104695.2 | 0 | 0.292939446 | 0.315 | 0.067 |
| WIPI1      | 0 | 0.292442872 | 0.293 | 0.066 |
| CHP1       | 0 | 0.292149357 | 0.466 | 0.132 |
| RALB       | 0 | 0.291522898 | 0.405 | 0.087 |
| TPD52L2    | 0 | 0.291362711 | 0.429 | 0.107 |
| TBC1D10A   | 0 | 0.29074119  | 0.318 | 0.077 |
| AC026202.2 | 0 | 0.290291861 | 0.439 | 0.134 |
| TICAM1     | 0 | 0.289356228 | 0.32  | 0.064 |
| DHRS3      | 0 | 0.288212512 | 0.299 | 0.065 |
| NBPF14     | 0 | 0.28622142  | 0.273 | 0.05  |
| LINC00847  | 0 | 0.284391746 | 0.288 | 0.05  |
| SCPEP11    | 0 | 0.283729345 | 0.463 | 0.141 |
| MYD88      | 0 | 0.283643217 | 0.372 | 0.079 |
| CSF2RB     | 0 | 0.28290061  | 0.282 | 0.042 |
| LINC00963  | 0 | 0.282867774 | 0.52  | 0.159 |
| TSPAN4     | 0 | 0.281881174 | 0.256 | 0.029 |
| ACADVL     | 0 | 0.281698719 | 0.523 | 0.169 |
| CAT        | 0 | 0.27994924  | 0.423 | 0.11  |
| VAMP3      | 0 | 0.279451893 | 0.421 | 0.094 |
| STX6       | 0 | 0.27929433  | 0.443 | 0.134 |
| METTL6     | 0 | 0.27724473  | 0.306 | 0.081 |
| PNPLA6     | 0 | 0.27678439  | 0.323 | 0.066 |
| TTL        | 0 | 0.276291496 | 0.299 | 0.071 |
| ITPK1      | 0 | 0.274177862 | 0.4   | 0.104 |
| PLXND1     | 0 | 0.273225319 | 0.312 | 0.052 |
| PDLIM7     | 0 | 0.271678258 | 0.256 | 0.036 |
| HLA-DOA    | 0 | 0.271490086 | 0.327 | 0.07  |
| CDK2AP1    | 0 | 0.271181524 | 0.372 | 0.077 |
| SCML1      | 0 | 0.268146572 | 0.428 | 0.118 |
| AKR1B1     | 0 | 0.267657619 | 0.409 | 0.119 |
| CARM1      | 0 | 0.266682494 | 0.261 | 0.053 |
| TWF2       | 0 | 0.266402572 | 0.512 | 0.175 |
| NCKAP5L    | 0 | 0.26608605  | 0.289 | 0.053 |
| TUBGCP2    | 0 | 0.265872951 | 0.496 | 0.151 |
| STARD3NL   | 0 | 0.264898779 | 0.467 | 0.138 |
| ABHD2      | 0 | 0.264218426 | 0.449 | 0.139 |
| BMP2K1     | 0 | 0.264089943 | 0.541 | 0.195 |
| ITPRIPL2   | 0 | 0.263846049 | 0.275 | 0.04  |
| CDH23      | 0 | 0.263505474 | 0.256 | 0.039 |

|            |           |             |       |       |
|------------|-----------|-------------|-------|-------|
| ADAMTSL4   | 0         | 0.263002911 | 0.254 | 0.024 |
| EIF4EBP1   | 0         | 0.262591249 | 0.433 | 0.114 |
| LY861      | 0         | 0.26231847  | 0.477 | 0.129 |
| TLR1       | 0         | 0.261951231 | 0.336 | 0.066 |
| MAPKAPK3   | 0         | 0.259768124 | 0.357 | 0.076 |
| LMO2       | 0         | 0.257335644 | 0.309 | 0.038 |
| PIP5K1C    | 0         | 0.256310716 | 0.282 | 0.056 |
| GALNT6     | 0         | 0.255369091 | 0.26  | 0.051 |
| TMEM106A   | 0         | 0.254833567 | 0.279 | 0.048 |
| PIGA       | 0         | 0.252593224 | 0.311 | 0.073 |
| SNX27      | 0         | 0.25235622  | 0.381 | 0.098 |
| NAAA       | 0         | 0.251724584 | 0.422 | 0.123 |
| PLXNB2     | 0         | 0.250290487 | 0.261 | 0.031 |
| NUBP1      | 0         | 0.250053157 | 0.448 | 0.137 |
| ENO11      | 7.00E-308 | 0.5844333   | 0.881 | 0.535 |
| TPRG1      | 1.86E-307 | 0.591279752 | 0.267 | 0.067 |
| NAPA       | 2.16E-307 | 0.40983164  | 0.74  | 0.323 |
| PGLS       | 2.29E-307 | 0.316831636 | 0.64  | 0.255 |
| MPZL1      | 4.43E-307 | 0.260067601 | 0.283 | 0.074 |
| PTPRM      | 5.22E-307 | 0.333096379 | 0.309 | 0.084 |
| DIAPH21    | 8.50E-307 | 0.587433008 | 0.796 | 0.384 |
| TYK2       | 1.19E-306 | 0.293084423 | 0.343 | 0.099 |
| ANXA111    | 4.10E-306 | 0.453646758 | 0.741 | 0.334 |
| RCC2       | 4.13E-305 | 0.287834208 | 0.444 | 0.149 |
| TBC1D14    | 7.51E-305 | 0.344396413 | 0.48  | 0.169 |
| TIPARP     | 1.28E-301 | 0.660322872 | 0.797 | 0.428 |
| ACTB       | 2.42E-301 | 0.762763127 | 0.972 | 0.883 |
| IRS22      | 9.45E-301 | 0.3314949   | 0.736 | 0.312 |
| POR1       | 5.03E-300 | 0.278492748 | 0.582 | 0.221 |
| PDIA3      | 1.50E-299 | 0.606856255 | 0.859 | 0.513 |
| IFIH1      | 1.08E-298 | 0.402196529 | 0.488 | 0.176 |
| MROH1      | 3.43E-298 | 0.269021196 | 0.314 | 0.088 |
| SYNGR21    | 3.45E-298 | 0.332827197 | 0.614 | 0.245 |
| ANKS1A     | 4.75E-298 | 0.382722443 | 0.475 | 0.169 |
| RHOB1      | 8.59E-298 | 0.39907776  | 0.553 | 0.216 |
| GRAMD1A    | 3.31E-297 | 0.331221808 | 0.466 | 0.164 |
| RNF1451    | 8.41E-295 | 0.452603063 | 0.739 | 0.339 |
| CSGALNACT2 | 4.62E-294 | 0.47795639  | 0.761 | 0.354 |
| TMEM38B    | 7.68E-294 | 0.293793063 | 0.382 | 0.121 |
| SLC2A3     | 9.62E-294 | 0.796160968 | 0.819 | 0.445 |
| GPD2       | 5.26E-293 | 0.281826974 | 0.381 | 0.12  |
| FNDC3A     | 2.04E-292 | 0.951613346 | 0.85  | 0.501 |
| UBAC2      | 3.15E-292 | 0.661772903 | 0.852 | 0.452 |

|         |           |             |       |       |
|---------|-----------|-------------|-------|-------|
| ZC3H3   | 4.57E-292 | 0.273167705 | 0.285 | 0.075 |
| ABHD5   | 3.34E-291 | 0.410843092 | 0.494 | 0.185 |
| FKBP1A  | 5.05E-289 | 0.381340157 | 0.748 | 0.345 |
| KCNN4   | 1.91E-288 | 0.253019471 | 0.262 | 0.067 |
| MED13L1 | 2.09E-287 | 0.650665841 | 0.922 | 0.573 |
| PDSS1   | 1.48E-286 | 0.475374231 | 0.296 | 0.083 |
| GLRX1   | 1.80E-286 | 0.358004238 | 0.666 | 0.291 |
| REV3L1  | 2.76E-286 | 0.811612953 | 0.819 | 0.462 |
| TFRC    | 2.41E-285 | 0.880194388 | 0.686 | 0.342 |
| TGIF11  | 4.69E-285 | 0.272113821 | 0.613 | 0.24  |
| GBE1    | 4.95E-285 | 0.580863864 | 0.489 | 0.185 |
| ATP1A1  | 2.37E-284 | 0.397587966 | 0.771 | 0.353 |
| CMIP1   | 5.93E-282 | 0.557735699 | 0.895 | 0.498 |
| SSR1    | 7.57E-280 | 0.276744981 | 0.577 | 0.227 |
| IER5    | 8.12E-280 | 0.452735225 | 0.81  | 0.398 |
| TPI1    | 2.68E-278 | 0.534126406 | 0.852 | 0.492 |
| FNIP11  | 6.17E-278 | 0.509367417 | 0.844 | 0.437 |
| POLG2   | 1.32E-277 | 0.341565861 | 0.416 | 0.143 |
| TMSB10  | 1.73E-277 | 0.710496144 | 0.981 | 0.93  |
| AZI2    | 3.32E-277 | 0.307207815 | 0.458 | 0.163 |
| RAB5C   | 4.07E-277 | 0.346419564 | 0.734 | 0.33  |
| DHRX    | 6.33E-277 | 0.41724034  | 0.598 | 0.249 |
| SUMF1   | 1.63E-276 | 0.367892064 | 0.537 | 0.21  |
| CSNK1A1 | 1.73E-276 | 0.562761401 | 0.926 | 0.576 |
| YWHAG   | 2.26E-275 | 0.297385326 | 0.616 | 0.25  |
| NDRG1   | 3.09E-275 | 0.400648308 | 0.626 | 0.265 |
| PTK2B   | 3.63E-275 | 0.512689832 | 0.722 | 0.34  |
| BCL2L1  | 5.33E-274 | 0.348310366 | 0.328 | 0.101 |
| RDX1    | 6.68E-274 | 0.363479142 | 0.594 | 0.244 |
| ENTPD12 | 6.24E-273 | 0.33885239  | 0.554 | 0.221 |
| ERCC1   | 1.71E-270 | 0.31410695  | 0.654 | 0.276 |
| B4GALT1 | 3.00E-268 | 0.546733915 | 0.893 | 0.49  |
| ERCC8   | 9.18E-268 | 0.32243803  | 0.265 | 0.072 |
| CAP1    | 1.69E-267 | 0.444782926 | 0.825 | 0.435 |
| PICALM1 | 3.76E-267 | 0.620062788 | 0.918 | 0.56  |
| A2M     | 6.49E-267 | 0.318343537 | 0.306 | 0.09  |
| ELL21   | 1.09E-266 | 0.617908709 | 0.929 | 0.6   |
| LMNA1   | 2.52E-266 | 0.553741699 | 0.778 | 0.42  |
| SLC2A13 | 1.23E-265 | 0.272442474 | 0.346 | 0.109 |
| NABP1   | 2.27E-265 | 0.357966274 | 0.711 | 0.321 |
| RBMS11  | 4.42E-265 | 0.323329293 | 0.775 | 0.368 |
| MCL1    | 5.29E-265 | 0.49253704  | 0.949 | 0.633 |
| RNF24   | 1.06E-264 | 0.320403119 | 0.442 | 0.16  |

|            |           |             |       |       |
|------------|-----------|-------------|-------|-------|
| AP2A2      | 1.34E-264 | 0.27961551  | 0.395 | 0.134 |
| ADA        | 2.20E-262 | 0.372870862 | 0.337 | 0.109 |
| TMEM1231   | 2.58E-262 | 0.603228525 | 0.844 | 0.485 |
| INTS14     | 2.70E-262 | 0.306789086 | 0.349 | 0.112 |
| TPM3       | 1.43E-261 | 0.527510435 | 0.926 | 0.646 |
| HIPK31     | 2.00E-260 | 0.379991229 | 0.663 | 0.29  |
| PCBP1      | 2.45E-260 | 0.446388054 | 0.822 | 0.444 |
| H3F3A1     | 3.76E-260 | 0.575583732 | 0.978 | 0.885 |
| BRCA2      | 7.99E-259 | 0.307634544 | 0.262 | 0.073 |
| HPS51      | 9.08E-259 | 0.283309271 | 0.523 | 0.202 |
| GAK        | 1.93E-257 | 0.352834767 | 0.59  | 0.244 |
| PSME2      | 1.31E-256 | 0.6474966   | 0.784 | 0.445 |
| NT5C2      | 2.89E-256 | 0.406719513 | 0.639 | 0.283 |
| LPP        | 3.78E-256 | 0.484415674 | 0.919 | 0.553 |
| SLAMF7     | 4.89E-254 | 0.412482224 | 0.389 | 0.14  |
| PAPSS1     | 1.05E-253 | 0.250556949 | 0.446 | 0.164 |
| N4BP2L1    | 1.28E-253 | 0.426056028 | 0.496 | 0.197 |
| RAB21      | 1.31E-253 | 0.398982318 | 0.803 | 0.404 |
| FER1       | 7.75E-253 | 0.31514653  | 0.48  | 0.184 |
| AC020916.1 | 7.82E-253 | 0.393862848 | 0.65  | 0.292 |
| NAF1       | 2.33E-252 | 0.610585665 | 0.442 | 0.174 |
| ATP2A2     | 9.63E-252 | 0.363556705 | 0.679 | 0.303 |
| EXT11      | 7.75E-251 | 0.893657539 | 0.678 | 0.342 |
| CAPN2      | 1.07E-250 | 0.266309224 | 0.568 | 0.23  |
| STK38L     | 2.35E-250 | 0.394622515 | 0.49  | 0.194 |
| HM13       | 5.35E-249 | 0.299882585 | 0.649 | 0.282 |
| CAPZB      | 5.85E-249 | 0.5270289   | 0.899 | 0.559 |
| PRELID1    | 2.11E-244 | 0.511437666 | 0.731 | 0.388 |
| MTMR3      | 2.53E-244 | 0.335540194 | 0.555 | 0.235 |
| GDI21      | 3.21E-243 | 0.375575335 | 0.788 | 0.402 |
| MRTFA      | 3.88E-243 | 0.41838385  | 0.752 | 0.366 |
| TUBA1C     | 3.34E-242 | 0.260290961 | 0.698 | 0.318 |
| SNAPC1     | 8.79E-242 | 0.546998944 | 0.439 | 0.17  |
| NFATC11    | 1.54E-241 | 0.415218021 | 0.573 | 0.242 |
| UBE2W      | 1.00E-240 | 0.301744148 | 0.573 | 0.241 |
| DNM2       | 1.37E-239 | 0.392422896 | 0.742 | 0.351 |
| NBEAL1     | 2.29E-238 | 0.291664902 | 0.512 | 0.206 |
| TXNDC11    | 3.18E-238 | 0.311567125 | 0.579 | 0.25  |
| VAPA       | 8.22E-238 | 0.456992447 | 0.871 | 0.496 |
| TMEM41B    | 1.76E-236 | 0.321676142 | 0.45  | 0.172 |
| PDPK1      | 2.59E-235 | 0.270217173 | 0.443 | 0.167 |
| BAG31      | 3.76E-235 | 0.642612702 | 0.55  | 0.24  |
| VAV1       | 5.30E-233 | 0.294468323 | 0.494 | 0.2   |



|            |           |             |       |       |
|------------|-----------|-------------|-------|-------|
| HOOK3      | 9.93E-233 | 0.329159788 | 0.714 | 0.331 |
| LAMTOR1    | 1.15E-231 | 0.253967202 | 0.607 | 0.262 |
| SARNP      | 3.68E-231 | 0.710603768 | 0.737 | 0.362 |
| BACH12     | 5.08E-231 | 0.534465387 | 0.899 | 0.528 |
| TACC1      | 5.88E-231 | 0.41294806  | 0.781 | 0.395 |
| STAT5A1    | 6.23E-231 | 0.253159166 | 0.481 | 0.189 |
| KCNQ10T1   | 1.04E-230 | 0.543933035 | 0.442 | 0.176 |
| ACTR3      | 1.45E-230 | 0.418831468 | 0.902 | 0.573 |
| TSC22D11   | 1.21E-229 | 0.286653477 | 0.436 | 0.168 |
| LRRFIP11   | 7.74E-228 | 0.533766481 | 0.95  | 0.66  |
| RHOG       | 9.30E-228 | 0.270537584 | 0.681 | 0.309 |
| LRRC23     | 1.66E-227 | 0.461998226 | 0.421 | 0.162 |
| PHLDA12    | 9.22E-227 | 0.251578532 | 0.548 | 0.23  |
| SNX291     | 1.42E-226 | 0.342538496 | 0.707 | 0.338 |
| KLHL61     | 6.39E-225 | 0.346245851 | 0.567 | 0.25  |
| RALGDS     | 1.73E-224 | 0.261224739 | 0.636 | 0.279 |
| IGF2R1     | 2.37E-224 | 0.486317916 | 0.665 | 0.33  |
| CLEC16A    | 3.08E-223 | 0.732165637 | 0.525 | 0.238 |
| STAT11     | 1.23E-221 | 0.416535624 | 0.718 | 0.361 |
| GEM        | 1.54E-221 | 0.30793695  | 0.336 | 0.117 |
| P4HA1      | 5.17E-221 | 0.266969835 | 0.632 | 0.283 |
| MAP4K41    | 9.93E-221 | 1.009448661 | 0.811 | 0.53  |
| GPCPD12    | 1.33E-218 | 0.655260086 | 0.879 | 0.556 |
| TFDP21     | 9.61E-218 | 0.392440492 | 0.56  | 0.249 |
| LINC022451 | 2.14E-217 | 0.312486889 | 0.491 | 0.203 |
| RNASEK     | 6.08E-217 | 0.447439271 | 0.897 | 0.634 |
| TWISTNB    | 9.40E-217 | 0.621044481 | 0.491 | 0.214 |
| ACTR2      | 9.09E-216 | 0.429059027 | 0.918 | 0.616 |
| EZH2       | 1.13E-215 | 0.52864167  | 0.549 | 0.249 |
| PAFAH1B2   | 3.34E-215 | 0.281856222 | 0.504 | 0.21  |
| LCP11      | 4.26E-215 | 0.476854517 | 0.909 | 0.63  |
| TRAK11     | 1.05E-214 | 0.332148106 | 0.619 | 0.285 |
| RBPJ2      | 1.24E-210 | 0.617329757 | 0.86  | 0.474 |
| BLOC1S11   | 1.87E-210 | 0.310146603 | 0.74  | 0.372 |
| PSMA6      | 2.34E-210 | 0.391105685 | 0.811 | 0.451 |
| HLA-DQA21  | 2.64E-210 | 0.853649145 | 0.534 | 0.264 |
| SLC7A51    | 6.30E-208 | 0.306829082 | 0.793 | 0.403 |
| CYBA       | 2.91E-206 | 0.533292026 | 0.955 | 0.829 |
| ARPC1B1    | 1.07E-205 | 0.474704596 | 0.884 | 0.612 |
| DDB1       | 1.49E-204 | 0.358940106 | 0.461 | 0.194 |
| LRRFIP21   | 3.04E-203 | 0.297370807 | 0.611 | 0.281 |
| TNFAIP33   | 7.56E-203 | 0.359123072 | 0.972 | 0.694 |
| PRNP       | 8.14E-203 | 0.307359091 | 0.606 | 0.271 |

|           |           |             |       |       |
|-----------|-----------|-------------|-------|-------|
| MICAL21   | 7.34E-202 | 0.25830912  | 0.361 | 0.134 |
| MFSD4B1   | 9.07E-202 | 0.528124536 | 0.511 | 0.228 |
| ZBTB101   | 2.78E-200 | 0.326769615 | 0.436 | 0.178 |
| S100A42   | 6.21E-200 | 0.535972873 | 0.868 | 0.584 |
| PRDM12    | 3.08E-199 | 0.373943532 | 0.672 | 0.337 |
| KCNAB2    | 2.20E-198 | 0.25324024  | 0.572 | 0.253 |
| TMTC2     | 5.78E-198 | 0.298508409 | 0.273 | 0.09  |
| IVNS1ABP  | 9.71E-198 | 0.312130163 | 0.794 | 0.431 |
| FRMD4A    | 1.65E-197 | 0.651493529 | 0.286 | 0.1   |
| HPCAL1    | 5.70E-197 | 0.467665115 | 0.535 | 0.244 |
| RGS21     | 9.81E-197 | 0.394570052 | 0.863 | 0.524 |
| IPO7      | 4.66E-194 | 0.287568757 | 0.609 | 0.282 |
| ZFP36L11  | 1.08E-193 | 0.484789872 | 0.814 | 0.476 |
| SRGN2     | 1.77E-193 | 0.490912017 | 0.993 | 0.88  |
| PPA1      | 1.75E-192 | 0.781279969 | 0.651 | 0.359 |
| TNFAIP81  | 5.86E-192 | 0.642298206 | 0.866 | 0.587 |
| TTC7A2    | 2.22E-191 | 0.31569955  | 0.563 | 0.258 |
| CDC371    | 2.31E-191 | 0.268984088 | 0.764 | 0.388 |
| UBL3      | 6.37E-191 | 0.345119015 | 0.765 | 0.395 |
| ITM2B     | 6.76E-191 | 0.550639305 | 0.928 | 0.769 |
| BANP1     | 1.41E-188 | 0.381216106 | 0.643 | 0.319 |
| ITPR21    | 1.40E-186 | 0.400281077 | 0.828 | 0.483 |
| SATB1-AS1 | 5.58E-186 | 0.251524655 | 0.374 | 0.146 |
| NDUFAF2   | 1.97E-185 | 0.314080763 | 0.444 | 0.189 |
| VAMP5     | 3.20E-185 | 0.353149095 | 0.535 | 0.25  |
| UBE2O     | 8.30E-185 | 0.32725149  | 0.403 | 0.166 |
| SPATS2L2  | 6.16E-184 | 0.33686593  | 0.643 | 0.309 |
| TENT4B1   | 4.52E-183 | 0.309697886 | 0.515 | 0.23  |
| UBE2D3    | 1.65E-182 | 0.469997772 | 0.962 | 0.745 |
| TIAM12    | 8.31E-178 | 0.305421686 | 0.514 | 0.232 |
| ERC11     | 3.72E-177 | 0.270899572 | 0.748 | 0.387 |
| CRADD1    | 1.97E-176 | 0.890924426 | 0.483 | 0.236 |
| CALR      | 2.33E-176 | 0.481946919 | 0.835 | 0.559 |
| SND1      | 3.31E-176 | 0.311765386 | 0.791 | 0.426 |
| PSMB3     | 3.91E-176 | 0.288026793 | 0.773 | 0.426 |
| NME2      | 4.07E-176 | 0.387119831 | 0.853 | 0.6   |
| PPP3R1    | 7.80E-175 | 0.417436392 | 0.705 | 0.372 |
| GFOD11    | 1.55E-174 | 0.293632822 | 0.422 | 0.181 |
| MALT12    | 1.07E-172 | 0.551696834 | 0.829 | 0.537 |
| RHOA      | 1.38E-168 | 0.346926336 | 0.93  | 0.673 |
| RNASET22  | 5.87E-168 | 0.371698299 | 0.851 | 0.534 |
| ZFY1      | 1.26E-167 | 0.467979439 | 0.369 | 0.161 |
| DLEU21    | 6.27E-167 | 0.335962855 | 0.825 | 0.477 |

|             |           |             |       |       |
|-------------|-----------|-------------|-------|-------|
| KPNA4       | 7.88E-167 | 0.308032557 | 0.761 | 0.403 |
| VMP1        | 7.14E-166 | 0.469772654 | 0.881 | 0.542 |
| HIF1A-AS31  | 1.08E-162 | 0.542021625 | 0.398 | 0.174 |
| ANKRD33B    | 1.64E-162 | 0.315869068 | 0.329 | 0.13  |
| AC007384.11 | 1.33E-160 | 0.366170109 | 0.749 | 0.422 |
| SEPTIN91    | 3.04E-160 | 0.486125881 | 0.745 | 0.429 |
| GAPDH1      | 1.19E-159 | 0.401035272 | 0.956 | 0.832 |
| FBXO111     | 3.02E-159 | 0.389944306 | 0.858 | 0.518 |
| MED13       | 1.18E-158 | 0.376782974 | 0.79  | 0.448 |
| HLA-DRB51   | 1.27E-155 | 0.883942847 | 0.459 | 0.226 |
| DBI         | 5.11E-154 | 0.337639579 | 0.806 | 0.503 |
| FBXO341     | 7.77E-150 | 0.313696882 | 0.755 | 0.428 |
| SERF2       | 2.12E-149 | 0.356589555 | 0.945 | 0.852 |
| SERINC52    | 3.20E-148 | 0.293569464 | 0.627 | 0.323 |
| SPSB1       | 4.68E-148 | 0.315136322 | 0.277 | 0.109 |
| PHF101      | 5.83E-148 | 0.265689013 | 0.357 | 0.152 |
| CD811       | 9.48E-147 | 0.494678092 | 0.743 | 0.506 |
| CLTA        | 1.19E-144 | 0.261233307 | 0.77  | 0.438 |
| TRAF32      | 1.34E-143 | 0.357335248 | 0.876 | 0.57  |
| BTBD112     | 1.81E-143 | 0.293978    | 0.336 | 0.143 |
| AP3B11      | 7.91E-143 | 0.39641106  | 0.785 | 0.456 |
| POMP        | 6.71E-142 | 0.3028418   | 0.832 | 0.532 |
| TOP1        | 9.03E-141 | 0.412783992 | 0.909 | 0.632 |
| CLIC11      | 2.29E-139 | 0.37358249  | 0.876 | 0.655 |
| PRDX1       | 3.53E-139 | 0.380206028 | 0.815 | 0.545 |
| MYL6        | 5.38E-137 | 0.352503408 | 0.94  | 0.824 |
| JMJD1C      | 1.29E-136 | 0.499614618 | 0.954 | 0.733 |
| DYNC1H1     | 4.41E-135 | 0.298468076 | 0.782 | 0.444 |
| EPG5        | 1.89E-133 | 0.282722253 | 0.415 | 0.199 |
| TUBA1B      | 3.08E-131 | 0.472394248 | 0.789 | 0.55  |
| RYBP1       | 9.81E-131 | 0.329758395 | 0.78  | 0.455 |
| ERBIN1      | 2.19E-130 | 0.397691181 | 0.792 | 0.483 |
| SSBP21      | 9.08E-130 | 0.609006318 | 0.521 | 0.28  |
| TLE4        | 3.03E-129 | 0.272734247 | 0.713 | 0.406 |
| CYTH12      | 4.70E-129 | 0.447253373 | 0.927 | 0.675 |
| UST1        | 3.47E-128 | 0.41052713  | 0.53  | 0.279 |
| CREBBP1     | 5.87E-128 | 0.275983452 | 0.832 | 0.498 |
| PSMD5       | 4.95E-127 | 0.602124591 | 0.344 | 0.161 |
| PDZD8       | 3.85E-124 | 0.250818996 | 0.466 | 0.232 |
| SAMSN12     | 9.57E-124 | 0.362244636 | 0.928 | 0.722 |
| AHNAK       | 1.02E-120 | 0.277264027 | 0.781 | 0.468 |
| ARPC31      | 6.89E-118 | 0.325432639 | 0.913 | 0.763 |
| ECE1        | 1.47E-117 | 0.424182618 | 0.408 | 0.212 |

|           |           |             |       |       |
|-----------|-----------|-------------|-------|-------|
| GLS1      | 1.05E-116 | 0.425982134 | 0.924 | 0.692 |
| ROCK1     | 3.81E-116 | 0.267392028 | 0.878 | 0.557 |
| AGO21     | 6.03E-115 | 0.260363199 | 0.797 | 0.475 |
| EIF4A3    | 4.36E-114 | 0.258345477 | 0.793 | 0.483 |
| HDAC91    | 8.14E-114 | 0.270713819 | 0.38  | 0.185 |
| SH3BGRL31 | 1.44E-112 | 0.360425443 | 0.926 | 0.78  |
| ZHX21     | 2.31E-110 | 0.389523459 | 0.85  | 0.585 |
| PFN11     | 4.62E-107 | 0.296263593 | 0.921 | 0.761 |
| PELI11    | 1.07E-103 | 0.440890388 | 0.773 | 0.503 |
| HNRNPU    | 2.19E-100 | 0.321743629 | 0.906 | 0.639 |
| ARPC21    | 2.54E-99  | 0.255243579 | 0.938 | 0.77  |
| PPP4R3A1  | 1.59E-98  | 0.378039503 | 0.768 | 0.481 |
| FOXK2     | 2.41E-95  | 0.340236643 | 0.528 | 0.292 |
| CHST111   | 6.25E-88  | 0.634001903 | 0.937 | 0.752 |
| CRIM1     | 8.47E-87  | 0.28518992  | 0.26  | 0.122 |
| SIK31     | 1.32E-83  | 0.343305228 | 0.97  | 0.808 |
| ANKH2     | 3.04E-78  | 0.418090985 | 0.456 | 0.265 |
| MAP3K21   | 4.49E-73  | 0.276820377 | 0.856 | 0.581 |
| ZFX       | 5.73E-68  | 0.407600992 | 0.493 | 0.298 |
| STEAP1B1  | 7.54E-68  | 0.253439824 | 0.441 | 0.251 |
| FOXN31    | 1.72E-56  | 0.258371892 | 0.919 | 0.711 |
| GZMK1     | 0         | 1.88229232  | 0.563 | 0.14  |
| CCL51     | 0         | 1.265223493 | 0.836 | 0.289 |
| GZMA1     | 0         | 0.854692958 | 0.589 | 0.204 |
| NKG71     | 0         | 0.74409461  | 0.575 | 0.23  |
| CD8A1     | 3.82E-295 | 1.134719934 | 0.387 | 0.137 |
| FYN3      | 2.14E-291 | 0.761771524 | 0.952 | 0.674 |
| CST71     | 3.26E-283 | 1.048578215 | 0.627 | 0.331 |
| PARP82    | 8.03E-253 | 0.871821258 | 0.821 | 0.624 |
| TC2N2     | 1.28E-251 | 1.041406992 | 0.472 | 0.215 |
| CD3D3     | 1.17E-247 | 0.788836647 | 0.779 | 0.463 |
| ANXA12    | 9.91E-244 | 1.329920079 | 0.662 | 0.413 |
| GZMM1     | 6.11E-234 | 0.889917353 | 0.445 | 0.207 |
| CD3G3     | 2.46E-225 | 0.837170368 | 0.665 | 0.392 |
| IL7R2     | 1.24E-213 | 1.05073727  | 0.7   | 0.468 |
| CD963     | 1.30E-213 | 0.753767778 | 0.738 | 0.468 |
| SYTL33    | 4.22E-207 | 0.731460408 | 0.848 | 0.649 |
| CD3E3     | 4.60E-205 | 0.7708662   | 0.686 | 0.427 |
| LEPROTL13 | 5.95E-203 | 0.768122007 | 0.783 | 0.603 |
| CD8B1     | 2.97E-202 | 0.922109867 | 0.3   | 0.111 |
| KLRK11    | 1.08E-190 | 0.857364888 | 0.35  | 0.146 |
| EPHA4     | 3.78E-189 | 1.01410466  | 0.29  | 0.112 |
| THEMIS3   | 2.82E-187 | 0.86718295  | 0.464 | 0.23  |

|          |           |             |       |       |
|----------|-----------|-------------|-------|-------|
| PITPNC12 | 6.52E-186 | 0.748871804 | 0.756 | 0.542 |
| CCSER23  | 2.40E-174 | 0.818477373 | 0.711 | 0.539 |
| AOAH1    | 2.02E-173 | 1.203104985 | 0.425 | 0.226 |
| RNF1252  | 9.49E-173 | 0.953043418 | 0.585 | 0.369 |
| DTHD11   | 1.69E-168 | 0.885279909 | 0.335 | 0.146 |
| BCL11B3  | 2.59E-167 | 0.638965376 | 0.684 | 0.43  |
| PPP2R5C3 | 5.33E-167 | 0.633321249 | 0.859 | 0.763 |
| RUNX31   | 9.35E-165 | 0.756817089 | 0.719 | 0.558 |
| CD25     | 3.68E-164 | 0.585753916 | 0.759 | 0.487 |
| CCL41    | 1.34E-162 | 0.77508221  | 0.537 | 0.301 |
| CBLB2    | 1.62E-161 | 0.571101563 | 0.838 | 0.652 |
| TRAT12   | 7.46E-158 | 0.82358833  | 0.374 | 0.184 |
| PTPRC3   | 3.21E-157 | 0.477017696 | 0.959 | 0.88  |
| LYAR1    | 3.33E-156 | 0.895775263 | 0.366 | 0.192 |
| PLAAT41  | 2.80E-155 | 0.842419516 | 0.572 | 0.392 |
| B2M3     | 5.05E-153 | 0.392445113 | 0.992 | 0.978 |
| GPR1712  | 2.70E-151 | 0.743924726 | 0.37  | 0.182 |
| SAMD31   | 1.20E-150 | 0.855811416 | 0.308 | 0.138 |
| TNFAIP34 | 1.29E-149 | 0.697706427 | 0.85  | 0.704 |
| ID21     | 2.25E-148 | 0.804412578 | 0.678 | 0.487 |
| ABLIM12  | 7.66E-146 | 1.077886678 | 0.545 | 0.363 |
| PRKCH3   | 5.05E-144 | 0.582512605 | 0.779 | 0.569 |
| CALM12   | 1.06E-143 | 0.582842879 | 0.91  | 0.872 |
| HCST1    | 3.26E-143 | 0.755287628 | 0.65  | 0.49  |
| ETS13    | 7.98E-143 | 0.568314508 | 0.821 | 0.639 |
| ZFP36L22 | 2.17E-140 | 0.648257296 | 0.893 | 0.813 |
| HLA-A3   | 8.50E-140 | 0.415070067 | 0.957 | 0.921 |
| SYNE23   | 1.76E-138 | 0.563257576 | 0.776 | 0.582 |
| RNF19A3  | 1.48E-137 | 0.671439508 | 0.764 | 0.621 |
| CNOT6L3  | 2.88E-136 | 0.516263179 | 0.883 | 0.75  |
| IL323    | 8.22E-136 | 0.307788848 | 0.77  | 0.488 |
| SRSF72   | 4.86E-135 | 0.665101758 | 0.848 | 0.787 |
| CXCR42   | 1.79E-133 | 0.675530437 | 0.891 | 0.813 |
| HLA-C2   | 1.91E-130 | 0.44750473  | 0.935 | 0.907 |
| CD62     | 2.68E-130 | 0.7137087   | 0.446 | 0.266 |
| H3F3B1   | 4.41E-129 | 0.502878085 | 0.951 | 0.923 |
| NIBAN13  | 3.60E-128 | 0.513330365 | 0.753 | 0.556 |
| CRTAM1   | 2.40E-126 | 0.777691825 | 0.273 | 0.121 |
| DUSP21   | 1.83E-124 | 0.866325753 | 0.651 | 0.512 |
| ANK31    | 1.62E-122 | 0.720802917 | 0.442 | 0.25  |
| PIK3R11  | 7.45E-116 | 0.782329105 | 0.628 | 0.511 |
| STAT43   | 1.05E-115 | 0.547529381 | 0.764 | 0.597 |
| PIP4K2A1 | 1.44E-113 | 0.691292702 | 0.698 | 0.6   |

|             |           |             |       |       |
|-------------|-----------|-------------|-------|-------|
| SCML42      | 8.16E-112 | 0.739636171 | 0.444 | 0.273 |
| SARAF2      | 7.50E-110 | 0.42080293  | 0.903 | 0.856 |
| SLA4        | 1.56E-109 | 0.626346667 | 0.653 | 0.508 |
| BICDL13     | 1.44E-106 | 0.642435561 | 0.581 | 0.399 |
| TGFBR31     | 4.53E-99  | 0.659652215 | 0.279 | 0.14  |
| TRBC23      | 7.74E-99  | 0.564547495 | 0.644 | 0.477 |
| PDE3B3      | 3.60E-98  | 0.438577277 | 0.766 | 0.572 |
| SYTL21      | 1.95E-97  | 0.573547063 | 0.289 | 0.147 |
| HLA-B1      | 2.74E-97  | 0.370516892 | 0.963 | 0.937 |
| SLFN12L1    | 7.20E-96  | 0.702597371 | 0.387 | 0.24  |
| CD991       | 5.20E-94  | 0.584023528 | 0.643 | 0.556 |
| RGCC2       | 7.51E-93  | 0.866611743 | 0.584 | 0.465 |
| SLA21       | 6.66E-92  | 0.684552126 | 0.314 | 0.176 |
| SYNE11      | 1.15E-91  | 0.803972645 | 0.448 | 0.318 |
| HLA-F2      | 1.52E-91  | 0.58810251  | 0.639 | 0.562 |
| EMB3        | 2.82E-91  | 0.612709611 | 0.61  | 0.511 |
| CD441       | 4.66E-91  | 0.400656251 | 0.857 | 0.781 |
| RALGAPA11   | 5.74E-89  | 0.695071581 | 0.695 | 0.617 |
| TUBA4A1     | 6.45E-89  | 0.775944777 | 0.534 | 0.422 |
| MLLT33      | 1.36E-88  | 0.820879965 | 0.444 | 0.298 |
| NFATC21     | 6.45E-88  | 0.743670743 | 0.468 | 0.347 |
| TRAC3       | 1.23E-87  | 0.444586183 | 0.619 | 0.432 |
| GIMAP72     | 1.74E-87  | 0.667535533 | 0.417 | 0.27  |
| ATXN13      | 2.54E-85  | 0.47568294  | 0.792 | 0.675 |
| SRGN3       | 1.19E-84  | 0.335958109 | 0.945 | 0.884 |
| CMC11       | 3.47E-84  | 0.927495369 | 0.366 | 0.245 |
| UBE2S1      | 3.62E-84  | 0.818577734 | 0.558 | 0.473 |
| PPP1R16B3   | 6.20E-84  | 0.543427986 | 0.704 | 0.584 |
| PDCD43      | 9.64E-83  | 0.510316439 | 0.696 | 0.621 |
| AKNA1       | 4.53E-79  | 0.675134268 | 0.545 | 0.452 |
| KIF21A1     | 3.49E-78  | 0.583905998 | 0.251 | 0.134 |
| MALAT11     | 6.59E-78  | 0.264887    | 1     | 0.986 |
| CRIP11      | 1.21E-77  | 0.553127998 | 0.781 | 0.707 |
| AF165147.12 | 2.27E-76  | 0.715704765 | 0.266 | 0.148 |
| IKZF13      | 4.70E-76  | 0.506728967 | 0.699 | 0.613 |
| FAM177A12   | 1.95E-74  | 0.659085095 | 0.591 | 0.518 |
| PLCB11      | 5.57E-74  | 0.584362995 | 0.255 | 0.136 |
| PRKCQ3      | 6.68E-74  | 0.534632541 | 0.447 | 0.305 |
| ITM2B1      | 1.09E-73  | 0.327794586 | 0.813 | 0.778 |
| ZFYVE281    | 1.30E-73  | 0.643033643 | 0.314 | 0.196 |
| CDK171      | 3.12E-73  | 0.654720015 | 0.63  | 0.55  |
| HLA-E1      | 6.43E-73  | 0.358502227 | 0.894 | 0.884 |
| MGAT4A2     | 1.27E-72  | 0.600716438 | 0.45  | 0.331 |

|             |          |             |       |       |
|-------------|----------|-------------|-------|-------|
| LINC018711  | 2.45E-72 | 0.57617015  | 0.273 | 0.149 |
| ITM2A3      | 5.99E-71 | 0.581660007 | 0.469 | 0.336 |
| VIM1        | 1.05E-70 | 0.477148834 | 0.843 | 0.76  |
| LDHA1       | 2.03E-70 | 0.533867166 | 0.652 | 0.586 |
| CD75        | 1.04E-68 | 0.463402636 | 0.549 | 0.393 |
| GIMAP42     | 2.34E-68 | 0.649831681 | 0.366 | 0.249 |
| SLC7A52     | 2.68E-68 | 0.618350074 | 0.515 | 0.426 |
| CAMK43      | 7.76E-68 | 0.394409713 | 0.539 | 0.377 |
| CDC42SE22   | 1.54E-67 | 0.371689262 | 0.862 | 0.801 |
| DDX51       | 2.99E-67 | 0.325592918 | 0.917 | 0.904 |
| GZMH1       | 7.76E-67 | 0.454117746 | 0.253 | 0.133 |
| INPP4B3     | 8.69E-67 | 0.463740207 | 0.486 | 0.336 |
| S100A101    | 2.70E-66 | 0.446932773 | 0.684 | 0.599 |
| MPZL32      | 9.96E-66 | 0.601706519 | 0.356 | 0.24  |
| GALM3       | 1.03E-64 | 0.661825545 | 0.518 | 0.422 |
| BTG12       | 1.96E-64 | 0.281206084 | 0.975 | 0.915 |
| MVB12B1     | 2.89E-64 | 0.607366262 | 0.253 | 0.148 |
| AC044849.12 | 5.60E-64 | 0.615182879 | 0.398 | 0.289 |
| PRF11       | 9.41E-63 | 0.481685207 | 0.287 | 0.168 |
| CLDND11     | 1.50E-60 | 0.730530836 | 0.407 | 0.319 |
| TRBC13      | 3.33E-59 | 0.435632688 | 0.437 | 0.294 |
| IQGAP22     | 5.94E-59 | 0.3364814   | 0.764 | 0.642 |
| MSN1        | 4.36E-58 | 0.47530063  | 0.672 | 0.634 |
| SMAD71      | 5.05E-58 | 0.693756953 | 0.436 | 0.354 |
| ADGRE51     | 1.06E-57 | 0.505843373 | 0.633 | 0.559 |
| APOBEC3G1   | 1.38E-57 | 0.579044125 | 0.359 | 0.255 |
| TSC22D31    | 3.98E-57 | 0.408408914 | 0.86  | 0.838 |
| LIME12      | 2.26E-56 | 0.579426124 | 0.362 | 0.259 |
| DDX243      | 3.11E-55 | 0.403562465 | 0.729 | 0.711 |
| MYH91       | 3.87E-55 | 0.417779053 | 0.694 | 0.678 |
| CALM2       | 4.26E-55 | 0.399047517 | 0.776 | 0.779 |
| ITK2        | 6.98E-53 | 0.33202216  | 0.594 | 0.44  |
| ARL4C2      | 1.52E-52 | 0.507801952 | 0.594 | 0.504 |
| EVL3        | 5.56E-52 | 0.454980427 | 0.601 | 0.525 |
| RSRP12      | 9.35E-52 | 0.51852778  | 0.623 | 0.604 |
| PBX42       | 1.03E-49 | 0.460424021 | 0.467 | 0.357 |
| SKAP13      | 1.19E-48 | 0.252402153 | 0.673 | 0.518 |
| CD692       | 3.12E-48 | 0.474742518 | 0.66  | 0.569 |
| TSPYL23     | 6.13E-46 | 0.57901759  | 0.559 | 0.489 |
| CLEC2B1     | 2.75E-44 | 0.453497038 | 0.512 | 0.435 |
| AAK13       | 3.15E-44 | 0.389341469 | 0.545 | 0.466 |
| PYHIN13     | 4.43E-44 | 0.513868631 | 0.381 | 0.279 |
| RNF2132     | 2.58E-43 | 0.436922809 | 0.651 | 0.621 |

|             |          |             |       |       |
|-------------|----------|-------------|-------|-------|
| RASA32      | 4.18E-43 | 0.607577904 | 0.414 | 0.339 |
| SH3BGRL32   | 8.36E-43 | 0.332531426 | 0.809 | 0.79  |
| GNG22       | 1.05E-41 | 0.338311103 | 0.675 | 0.601 |
| CEMIP23     | 3.14E-41 | 0.343957513 | 0.736 | 0.67  |
| ATP8A12     | 2.56E-40 | 0.462098288 | 0.509 | 0.428 |
| KLF122      | 3.26E-40 | 0.447558924 | 0.572 | 0.496 |
| RABGAP1L1   | 5.52E-40 | 0.337360425 | 0.818 | 0.792 |
| BTN3A11     | 5.88E-40 | 0.540379185 | 0.304 | 0.229 |
| SLC38A21    | 6.05E-40 | 0.502233795 | 0.59  | 0.563 |
| ZBTB201     | 1.26E-39 | 0.351508885 | 0.755 | 0.717 |
| AKT32       | 1.61E-39 | 0.510342661 | 0.565 | 0.503 |
| PCED1B-AS13 | 4.10E-39 | 0.466723499 | 0.51  | 0.457 |
| LCK3        | 4.50E-39 | 0.396167141 | 0.413 | 0.324 |
| SRSF51      | 4.54E-39 | 0.358742617 | 0.739 | 0.758 |
| PAXX1       | 5.97E-39 | 0.508679455 | 0.379 | 0.313 |
| CRYBG12     | 3.45E-38 | 0.278671648 | 0.561 | 0.478 |
| EIF11       | 4.59E-38 | 0.251126145 | 0.949 | 0.941 |
| OXNAD13     | 2.54E-37 | 0.435454221 | 0.496 | 0.425 |
| ZBED41      | 3.66E-37 | 0.490688631 | 0.265 | 0.188 |
| BTN3A21     | 4.27E-37 | 0.5531008   | 0.354 | 0.288 |
| STAT5B3     | 2.15E-36 | 0.466014887 | 0.481 | 0.411 |
| WNK12       | 2.50E-36 | 0.391006886 | 0.637 | 0.613 |
| FAM102A     | 2.75E-36 | 0.531624164 | 0.382 | 0.311 |
| KIF13B1     | 3.84E-36 | 0.53484199  | 0.453 | 0.398 |
| TUBB4B      | 1.86E-35 | 0.689377956 | 0.532 | 0.51  |
| GTDC11      | 4.17E-35 | 0.515687787 | 0.397 | 0.323 |
| MPP71       | 1.68E-34 | 0.366091896 | 0.413 | 0.324 |
| ACAP12      | 2.25E-34 | 0.456461799 | 0.498 | 0.462 |
| SRSF21      | 5.93E-34 | 0.500405832 | 0.575 | 0.573 |
| UBB1        | 5.99E-34 | 0.463013308 | 0.845 | 0.85  |
| AC068587.42 | 6.86E-34 | 0.518673116 | 0.285 | 0.208 |
| TRERF12     | 1.21E-33 | 0.498027942 | 0.315 | 0.238 |
| TGFB11      | 2.40E-33 | 0.584877881 | 0.589 | 0.579 |
| TXNIP2      | 2.92E-33 | 0.563765783 | 0.737 | 0.724 |
| STK17A2     | 7.94E-33 | 0.306465047 | 0.686 | 0.647 |
| FUS         | 9.13E-33 | 0.391152549 | 0.714 | 0.733 |
| SFMBT21     | 1.00E-32 | 0.535678254 | 0.446 | 0.384 |
| SPOCK22     | 2.03E-32 | 0.316347185 | 0.534 | 0.446 |
| PPP1R101    | 2.42E-32 | 0.442040382 | 0.593 | 0.586 |
| JMJD61      | 2.54E-32 | 0.544375742 | 0.335 | 0.277 |
| SLC38A12    | 3.76E-32 | 0.31594548  | 0.658 | 0.614 |
| IER5L1      | 5.62E-32 | 0.598212158 | 0.279 | 0.209 |
| SH2D1A2     | 7.11E-32 | 0.452144671 | 0.253 | 0.179 |



|            |          |             |       |       |
|------------|----------|-------------|-------|-------|
| GALNT111   | 2.45E-31 | 0.571965236 | 0.312 | 0.25  |
| MYLIP1     | 3.38E-31 | 0.528215048 | 0.485 | 0.445 |
| IDS1       | 6.55E-31 | 0.435736982 | 0.565 | 0.551 |
| ERN11      | 1.75E-30 | 0.437311491 | 0.439 | 0.38  |
| ATP2B43    | 1.90E-29 | 0.508388376 | 0.376 | 0.312 |
| MYL12B1    | 2.21E-29 | 0.293410794 | 0.693 | 0.709 |
| ZNF8312    | 2.93E-29 | 0.314978833 | 0.473 | 0.388 |
| ISG201     | 5.84E-29 | 0.321069547 | 0.732 | 0.722 |
| PCNX22     | 6.21E-29 | 0.445712875 | 0.35  | 0.286 |
| HNRNPLL3   | 1.08E-28 | 0.427724347 | 0.393 | 0.323 |
| TUBA1A     | 1.38E-28 | 0.493635386 | 0.533 | 0.499 |
| PPP1R22    | 1.41E-28 | 0.365549122 | 0.622 | 0.615 |
| LINC005132 | 2.26E-28 | 0.380326837 | 0.663 | 0.656 |
| KLF61      | 3.46E-28 | 0.329714438 | 0.808 | 0.784 |
| GUK11      | 3.85E-28 | 0.336182896 | 0.571 | 0.579 |
| TOB12      | 5.21E-28 | 0.59598397  | 0.355 | 0.304 |
| MYADM      | 7.09E-28 | 0.617894867 | 0.358 | 0.308 |
| NDUFS52    | 4.57E-27 | 0.351831179 | 0.579 | 0.581 |
| TG2        | 6.53E-27 | 0.484201756 | 0.268 | 0.205 |
| SLFN53     | 7.53E-27 | 0.496380443 | 0.367 | 0.313 |
| CDC42EP31  | 1.47E-26 | 0.545087528 | 0.362 | 0.307 |
| SPTAN12    | 1.89E-26 | 0.502952125 | 0.494 | 0.473 |
| CCNH1      | 2.77E-26 | 0.326916086 | 0.664 | 0.658 |
| LMNA2      | 3.01E-26 | 0.597702133 | 0.487 | 0.444 |
| NASP       | 3.70E-26 | 0.456927993 | 0.552 | 0.553 |
| PRKX1      | 2.25E-25 | 0.459968238 | 0.34  | 0.281 |
| PSME11     | 2.71E-25 | 0.345964943 | 0.621 | 0.631 |
| HIST2H2AC1 | 2.71E-25 | 0.526556762 | 0.264 | 0.209 |
| RESF11     | 4.61E-25 | 0.36761423  | 0.582 | 0.563 |
| NAA501     | 1.86E-24 | 0.455968509 | 0.452 | 0.424 |
| ABHD17A1   | 1.91E-24 | 0.434699431 | 0.386 | 0.35  |
| STOM1      | 3.91E-24 | 0.448347565 | 0.251 | 0.196 |
| CORO71     | 1.27E-23 | 0.488811677 | 0.354 | 0.308 |
| RNF1151    | 2.44E-23 | 0.502193867 | 0.398 | 0.366 |
| EIF4A21    | 3.56E-23 | 0.305036031 | 0.657 | 0.684 |
| PLP21      | 8.35E-23 | 0.453918197 | 0.418 | 0.393 |
| SRSF31     | 2.72E-22 | 0.28029743  | 0.733 | 0.762 |
| TBC1D2B1   | 3.95E-22 | 0.458213342 | 0.263 | 0.211 |
| NDFIP12    | 6.15E-22 | 0.326211983 | 0.54  | 0.529 |
| SOD12      | 8.97E-22 | 0.269723435 | 0.668 | 0.67  |
| SOCS11     | 9.66E-22 | 0.457791399 | 0.425 | 0.387 |
| CMIP2      | 1.30E-21 | 0.403351424 | 0.547 | 0.527 |
| DIP2A1     | 2.45E-21 | 0.431374654 | 0.272 | 0.222 |

|            |          |             |       |       |
|------------|----------|-------------|-------|-------|
| CDC14A3    | 2.92E-21 | 0.411367877 | 0.455 | 0.405 |
| SERTAD11   | 3.38E-21 | 0.566347917 | 0.36  | 0.327 |
| HIST1H4C   | 3.56E-21 | 0.517758642 | 0.421 | 0.392 |
| SAP18      | 4.78E-21 | 0.324550232 | 0.634 | 0.668 |
| SUPT3H1    | 1.14E-20 | 0.422310807 | 0.375 | 0.323 |
| HERPUD21   | 2.35E-20 | 0.425405908 | 0.4   | 0.371 |
| AUTS22     | 5.60E-20 | 0.288947893 | 0.367 | 0.294 |
| MCUB1      | 6.32E-20 | 0.434730342 | 0.385 | 0.353 |
| KLF131     | 6.86E-20 | 0.43975632  | 0.422 | 0.41  |
| OCIAD22    | 8.30E-20 | 0.371533641 | 0.385 | 0.349 |
| DDX3X1     | 1.17E-19 | 0.35251183  | 0.659 | 0.69  |
| PIK3IP12   | 2.06E-19 | 0.268750764 | 0.531 | 0.494 |
| DUSP42     | 2.15E-19 | 0.297182333 | 0.443 | 0.379 |
| SKP11      | 2.53E-19 | 0.252883434 | 0.68  | 0.725 |
| NEU11      | 3.98E-19 | 0.606652897 | 0.297 | 0.256 |
| BIN21      | 4.11E-19 | 0.400922493 | 0.324 | 0.285 |
| JAML2      | 5.92E-19 | 0.366919634 | 0.262 | 0.209 |
| LINC016192 | 6.01E-19 | 0.352573058 | 0.693 | 0.668 |
| RAB27A1    | 7.33E-19 | 0.338275696 | 0.394 | 0.349 |
| ARAP23     | 8.26E-19 | 0.311539964 | 0.514 | 0.481 |
| OAT1       | 9.06E-19 | 0.498116631 | 0.302 | 0.264 |
| EIF5       | 1.19E-18 | 0.277969064 | 0.686 | 0.729 |
| GSPT12     | 1.59E-18 | 0.339417601 | 0.574 | 0.576 |
| LINC019343 | 1.77E-18 | 0.316792234 | 0.326 | 0.26  |
| TGFBR22    | 3.04E-18 | 0.302501826 | 0.47  | 0.446 |
| CASP83     | 3.33E-18 | 0.343136671 | 0.478 | 0.449 |
| PPP2R5A1   | 5.74E-18 | 0.422973223 | 0.333 | 0.298 |
| H2AFX1     | 9.42E-18 | 0.50283905  | 0.275 | 0.235 |
| ANKRD13D1  | 1.25E-17 | 0.391137451 | 0.256 | 0.214 |
| MAPRE21    | 1.29E-17 | 0.38209904  | 0.484 | 0.469 |
| PGK11      | 1.77E-17 | 0.312602137 | 0.572 | 0.593 |
| LRRC8C3    | 2.89E-17 | 0.365767405 | 0.395 | 0.359 |
| TMEM50A2   | 2.90E-17 | 0.349084364 | 0.482 | 0.488 |
| PMEPA11    | 3.05E-17 | 0.514733671 | 0.326 | 0.292 |
| S1PR41     | 4.54E-17 | 0.365042343 | 0.252 | 0.207 |
| LYST1      | 5.44E-17 | 0.497826416 | 0.495 | 0.486 |
| NCALD2     | 1.26E-16 | 0.278500341 | 0.285 | 0.222 |
| BRD11      | 1.64E-16 | 0.420910347 | 0.337 | 0.31  |
| LBH3       | 2.17E-16 | 0.333432488 | 0.407 | 0.369 |
| DOCK81     | 2.20E-16 | 0.268002681 | 0.674 | 0.697 |
| SUN21      | 6.08E-16 | 0.397205959 | 0.307 | 0.276 |
| LY6E1      | 7.99E-16 | 0.37911691  | 0.462 | 0.446 |
| LPIN22     | 1.84E-15 | 0.430832947 | 0.388 | 0.369 |

|             |          |             |       |       |
|-------------|----------|-------------|-------|-------|
| ITGA42      | 2.45E-15 | 0.319923894 | 0.485 | 0.472 |
| INTS6       | 4.04E-15 | 0.45716871  | 0.504 | 0.493 |
| POLR2A1     | 5.27E-15 | 0.495928391 | 0.478 | 0.49  |
| TMEM1811    | 1.04E-14 | 0.404514969 | 0.27  | 0.233 |
| PSMB91      | 1.17E-14 | 0.289745127 | 0.536 | 0.547 |
| HMGB21      | 1.84E-14 | 0.343428529 | 0.457 | 0.448 |
| PTP4A21     | 3.01E-14 | 0.347246899 | 0.488 | 0.508 |
| TCF71       | 3.09E-14 | 0.312159805 | 0.258 | 0.214 |
| ARHGEF32    | 5.70E-14 | 0.362973427 | 0.344 | 0.31  |
| TERF2IP1    | 1.19E-13 | 0.280302254 | 0.527 | 0.544 |
| CIB1        | 1.83E-13 | 0.270987866 | 0.549 | 0.575 |
| AL627171.21 | 2.07E-13 | 0.537802604 | 0.362 | 0.351 |
| SIRT21      | 2.43E-13 | 0.405781606 | 0.27  | 0.242 |
| OPTN2       | 2.44E-13 | 0.341584524 | 0.354 | 0.328 |
| H2AFZ1      | 3.80E-13 | 0.257913493 | 0.591 | 0.611 |
| RASAL31     | 6.26E-13 | 0.351442606 | 0.279 | 0.249 |
| P2RY81      | 1.42E-12 | 0.435568863 | 0.367 | 0.337 |
| IKZF32      | 1.92E-12 | 0.262365937 | 0.453 | 0.424 |
| PATJ1       | 2.14E-12 | 0.261635315 | 0.262 | 0.218 |
| EIF4A31     | 2.99E-12 | 0.328591777 | 0.497 | 0.507 |
| PTPN42      | 3.13E-12 | 0.251184568 | 0.34  | 0.3   |
| PRMT21      | 3.74E-12 | 0.388760371 | 0.338 | 0.327 |
| MAML21      | 5.44E-12 | 0.2813829   | 0.595 | 0.58  |
| RCAN32      | 8.51E-12 | 0.30193083  | 0.339 | 0.309 |
| AHNAK1      | 1.12E-11 | 0.261263242 | 0.494 | 0.491 |
| C12orf571   | 1.21E-11 | 0.267137636 | 0.505 | 0.515 |
| ATXN72      | 1.26E-11 | 0.309467356 | 0.388 | 0.377 |
| GABARAPL11  | 1.36E-11 | 0.39631941  | 0.316 | 0.296 |
| MACF11      | 1.70E-11 | 0.323028871 | 0.523 | 0.538 |
| WAKMAR22    | 1.75E-11 | 0.361549544 | 0.279 | 0.249 |
| TUBA1C1     | 2.10E-11 | 0.381328556 | 0.359 | 0.346 |
| METRNL2     | 3.38E-11 | 0.418441837 | 0.362 | 0.341 |
| ODC1        | 4.34E-11 | 0.407343248 | 0.427 | 0.43  |
| ARHGEF11    | 4.49E-11 | 0.346535731 | 0.357 | 0.347 |
| C5orf561    | 6.61E-11 | 0.387944158 | 0.28  | 0.258 |
| BRD2        | 6.87E-11 | 0.367297823 | 0.494 | 0.531 |
| CITED22     | 6.98E-11 | 0.452200486 | 0.331 | 0.314 |
| PTPN71      | 7.30E-11 | 0.403633749 | 0.308 | 0.29  |
| ITGAL2      | 7.69E-11 | 0.354118624 | 0.268 | 0.24  |
| KANSL13     | 1.15E-10 | 0.288717811 | 0.529 | 0.542 |
| TECR1       | 1.73E-10 | 0.367721725 | 0.342 | 0.337 |
| CKLF1       | 2.42E-10 | 0.298664605 | 0.415 | 0.405 |
| HECA1       | 2.61E-10 | 0.282181426 | 0.488 | 0.499 |

|           |          |             |       |       |
|-----------|----------|-------------|-------|-------|
| RASGRP13  | 1.04E-09 | 0.270386282 | 0.328 | 0.298 |
| NUFIP2    | 1.22E-09 | 0.313405621 | 0.537 | 0.571 |
| RIPK1     | 1.28E-09 | 0.464449833 | 0.335 | 0.33  |
| SEMA4D1   | 2.08E-09 | 0.345550684 | 0.412 | 0.422 |
| MACO11    | 2.57E-09 | 0.390756824 | 0.297 | 0.284 |
| H1FX1     | 2.71E-09 | 0.286478588 | 0.419 | 0.413 |
| RASA13    | 3.56E-09 | 0.318675344 | 0.441 | 0.444 |
| CCDC85B1  | 3.59E-09 | 0.345081705 | 0.366 | 0.371 |
| NFE2L31   | 4.12E-09 | 0.460017596 | 0.295 | 0.277 |
| ENSA1     | 6.42E-09 | 0.262663376 | 0.541 | 0.583 |
| ODF2L2    | 7.06E-09 | 0.275271188 | 0.343 | 0.325 |
| PPP1R14B  | 1.04E-08 | 0.429540336 | 0.285 | 0.274 |
| PPDPF1    | 1.69E-08 | 0.300836848 | 0.415 | 0.431 |
| AMD1      | 1.76E-08 | 0.31505019  | 0.482 | 0.512 |
| ITGAE1    | 2.51E-08 | 0.372100877 | 0.314 | 0.298 |
| SNHG12    | 3.36E-08 | 0.371863875 | 0.271 | 0.256 |
| EIF1AX    | 4.17E-08 | 0.320297822 | 0.466 | 0.503 |
| XPC       | 5.31E-08 | 0.330077768 | 0.267 | 0.251 |
| TLE41     | 5.61E-08 | 0.344623733 | 0.423 | 0.429 |
| ORAI1     | 5.69E-08 | 0.346159632 | 0.25  | 0.234 |
| ATP1A11   | 1.38E-07 | 0.36022197  | 0.377 | 0.385 |
| DYNLL11   | 1.49E-07 | 0.293692813 | 0.588 | 0.64  |
| PER11     | 1.57E-07 | 0.351862655 | 0.392 | 0.408 |
| ARHGEF71  | 2.13E-07 | 0.270697152 | 0.374 | 0.371 |
| NKTR1     | 2.14E-07 | 0.279025292 | 0.454 | 0.477 |
| SNRK      | 2.84E-07 | 0.333579443 | 0.288 | 0.278 |
| SLC25A262 | 2.86E-07 | 0.3624816   | 0.39  | 0.399 |
| HNRNPUL11 | 3.00E-07 | 0.317707371 | 0.474 | 0.519 |
| PCED1B2   | 3.30E-07 | 0.327054557 | 0.358 | 0.343 |
| SKI       | 4.87E-07 | 0.34415076  | 0.367 | 0.375 |
| GPR651    | 5.48E-07 | 0.322637047 | 0.264 | 0.247 |
| GCC21     | 6.20E-07 | 0.254688769 | 0.509 | 0.544 |
| BTD1      | 7.28E-07 | 0.403569057 | 0.294 | 0.285 |
| KIF2A2    | 1.05E-06 | 0.2903476   | 0.377 | 0.384 |
| GLUD12    | 1.29E-06 | 0.322389442 | 0.408 | 0.417 |
| RNF381    | 1.83E-06 | 0.282481174 | 0.4   | 0.409 |
| NCOA12    | 4.58E-06 | 0.258319303 | 0.497 | 0.525 |
| SLC4A72   | 4.75E-06 | 0.28978158  | 0.42  | 0.43  |
| TAF71     | 5.56E-06 | 0.287575968 | 0.432 | 0.464 |
| NLRC52    | 5.76E-06 | 0.294857133 | 0.307 | 0.302 |
| HMOX21    | 9.09E-06 | 0.29317082  | 0.255 | 0.246 |
| IFNGR11   | 9.27E-06 | 0.324864905 | 0.298 | 0.296 |
| SMURF21   | 9.77E-06 | 0.334998944 | 0.333 | 0.336 |

|             |             |             |       |       |
|-------------|-------------|-------------|-------|-------|
| HEXIM1      | 9.91E-06    | 0.415908825 | 0.271 | 0.267 |
| GGA22       | 1.15E-05    | 0.338040648 | 0.363 | 0.372 |
| DHRS71      | 1.74E-05    | 0.310911763 | 0.335 | 0.347 |
| REEP51      | 3.89E-05    | 0.292720453 | 0.405 | 0.448 |
| RBL22       | 4.26E-05    | 0.296939181 | 0.257 | 0.25  |
| TENT5C1     | 4.40E-05    | 0.250221981 | 0.47  | 0.489 |
| CCDC97      | 5.63E-05    | 0.419264536 | 0.28  | 0.284 |
| GSTK11      | 5.66E-05    | 0.283402661 | 0.409 | 0.45  |
| TBC1D10C1   | 6.04E-05    | 0.272158563 | 0.266 | 0.261 |
| TARSL2      | 6.50E-05    | 0.287714774 | 0.252 | 0.243 |
| SURF41      | 8.63E-05    | 0.319193195 | 0.319 | 0.337 |
| SENP7       | 9.58E-05    | 0.273410033 | 0.304 | 0.304 |
| HNRNPH1     | 0.000189835 | 0.252821539 | 0.503 | 0.573 |
| URI11       | 0.00022887  | 0.276917965 | 0.375 | 0.397 |
| NSMCE31     | 0.000232059 | 0.295560291 | 0.308 | 0.312 |
| GALNT101    | 0.000335919 | 0.292810499 | 0.27  | 0.267 |
| PITHD1      | 0.000385415 | 0.294672281 | 0.253 | 0.254 |
| SMARCA5     | 0.00051235  | 0.264666353 | 0.459 | 0.514 |
| ARHGAP91    | 0.000730674 | 0.255590061 | 0.276 | 0.28  |
| PRKAR2A1    | 0.00080913  | 0.296697227 | 0.344 | 0.357 |
| AC020916.11 | 0.000857859 | 0.293358956 | 0.312 | 0.319 |
| DYNLT1      | 0.001190222 | 0.268484067 | 0.367 | 0.397 |
| VCP         | 0.001268404 | 0.302612933 | 0.433 | 0.487 |
| EVI2A2      | 0.001464225 | 0.268155896 | 0.366 | 0.391 |
| DOK22       | 0.001701307 | 0.348819178 | 0.27  | 0.272 |
| GADD45B1    | 0.001913419 | 0.368690906 | 0.442 | 0.463 |
| C9orf78     | 0.002395239 | 0.279238607 | 0.327 | 0.352 |
| MAN2A11     | 0.002708059 | 0.283725156 | 0.433 | 0.469 |
| AC245297.31 | 0.003112526 | 0.250166054 | 0.274 | 0.28  |
| PDCL32      | 0.003692829 | 0.290677571 | 0.273 | 0.281 |
| PRKACB2     | 0.005253154 | 0.252956226 | 0.308 | 0.316 |
| XPO4        | 0.008879088 | 0.282416732 | 0.28  | 0.292 |
| IGLC2       | 0           | 7.656356838 | 0.82  | 0.452 |
| IGKC        | 0           | 7.394720751 | 0.968 | 0.701 |
| IGHG1       | 0           | 6.877723358 | 0.779 | 0.234 |
| IGLC3       | 0           | 6.850794943 | 0.567 | 0.175 |
| IGLC1       | 0           | 6.763970328 | 0.701 | 0.15  |
| IGHG3       | 0           | 6.351789973 | 0.709 | 0.242 |
| IGHA1       | 0           | 6.31442148  | 0.621 | 0.267 |
| IGHG4       | 0           | 5.930148492 | 0.716 | 0.228 |
| IGHGP       | 0           | 5.903282035 | 0.491 | 0.062 |
| IGHG2       | 0           | 5.654448452 | 0.483 | 0.055 |
| JCHAIN      | 0           | 5.352328689 | 0.678 | 0.096 |

|             |   |             |       |       |
|-------------|---|-------------|-------|-------|
| MZB1        | 0 | 3.495611353 | 0.839 | 0.089 |
| SSR4        | 0 | 2.8281346   | 0.878 | 0.656 |
| DERL3       | 0 | 2.499603257 | 0.753 | 0.032 |
| XBP11       | 0 | 2.165573838 | 0.782 | 0.289 |
| TXNDC5      | 0 | 2.120232426 | 0.722 | 0.088 |
| FKBP11      | 0 | 1.953211765 | 0.735 | 0.179 |
| PRDX4       | 0 | 1.604382693 | 0.653 | 0.13  |
| COBLL11     | 0 | 1.453776221 | 0.662 | 0.126 |
| SEC11C1     | 0 | 1.415245205 | 0.744 | 0.317 |
| IFNG-AS1    | 0 | 1.384993259 | 0.519 | 0.097 |
| ST6GAL11    | 0 | 1.370173854 | 0.738 | 0.34  |
| JSRP1       | 0 | 1.354703681 | 0.545 | 0.071 |
| CD381       | 0 | 1.325573951 | 0.617 | 0.148 |
| GAB11       | 0 | 1.314799723 | 0.552 | 0.106 |
| CREB3L21    | 0 | 1.294947584 | 0.565 | 0.182 |
| AC008014.11 | 0 | 1.263284782 | 0.531 | 0.141 |
| MYO1D1      | 0 | 1.255061837 | 0.614 | 0.186 |
| RRBP11      | 0 | 1.191565468 | 0.657 | 0.23  |
| CROCC       | 0 | 1.187511051 | 0.444 | 0.146 |
| IGLV3-1     | 0 | 1.132778087 | 0.277 | 0.002 |
| LINC02384   | 0 | 1.122892272 | 0.48  | 0.062 |
| CFAP54      | 0 | 1.12072333  | 0.345 | 0.027 |
| ACOXL       | 0 | 1.119074035 | 0.323 | 0.02  |
| AC007569.1  | 0 | 1.101474532 | 0.381 | 0.038 |
| ESR1        | 0 | 1.085741136 | 0.409 | 0.039 |
| ITM2C1      | 0 | 1.079436898 | 0.632 | 0.136 |
| POU2AF11    | 0 | 1.031833402 | 0.498 | 0.083 |
| DENND5B1    | 0 | 1.018043029 | 0.491 | 0.101 |
| SPATS2      | 0 | 0.983148367 | 0.519 | 0.13  |
| LINC02362   | 0 | 0.932072676 | 0.364 | 0.022 |
| CLIC41      | 0 | 0.924073164 | 0.587 | 0.193 |
| FCRL5       | 0 | 0.916172091 | 0.473 | 0.023 |
| SELENOS     | 0 | 0.910438632 | 0.659 | 0.255 |
| BLNK1       | 0 | 0.910283341 | 0.462 | 0.077 |
| SSR3        | 0 | 0.908470661 | 0.717 | 0.337 |
| SOX5        | 0 | 0.86451726  | 0.403 | 0.072 |
| EIF2AK4     | 0 | 0.864477918 | 0.571 | 0.156 |
| BCAR3       | 0 | 0.862877023 | 0.329 | 0.075 |
| PDK1        | 0 | 0.839726055 | 0.416 | 0.092 |
| HIST1H2BJ   | 0 | 0.836943065 | 0.321 | 0.048 |
| SEL1L       | 0 | 0.812514127 | 0.595 | 0.216 |
| TBC1D92     | 0 | 0.794044243 | 0.407 | 0.118 |
| ZNF215      | 0 | 0.780909765 | 0.289 | 0.008 |

|             |   |             |       |       |
|-------------|---|-------------|-------|-------|
| LRRK1       | 0 | 0.769518461 | 0.357 | 0.087 |
| SLC44A11    | 0 | 0.769115824 | 0.471 | 0.125 |
| RASSF6      | 0 | 0.767275902 | 0.311 | 0.03  |
| ZBP1        | 0 | 0.764964777 | 0.45  | 0.113 |
| SLAMF71     | 0 | 0.759199381 | 0.527 | 0.132 |
| TNFRSF17    | 0 | 0.72912179  | 0.375 | 0.007 |
| HIST1H2BD   | 0 | 0.72884415  | 0.345 | 0.077 |
| SEC24D1     | 0 | 0.725426254 | 0.52  | 0.186 |
| GNG71       | 0 | 0.703589033 | 0.726 | 0.268 |
| AL591518.1  | 0 | 0.700245713 | 0.251 | 0.02  |
| SDF2L1      | 0 | 0.684080574 | 0.588 | 0.201 |
| AC007952.41 | 0 | 0.68241725  | 0.47  | 0.141 |
| ERLEC1      | 0 | 0.681731566 | 0.594 | 0.211 |
| SSPN        | 0 | 0.656185834 | 0.28  | 0.058 |
| LMAN1       | 0 | 0.642089795 | 0.651 | 0.281 |
| AC012236.1  | 0 | 0.641287019 | 0.308 | 0.006 |
| RHEX1       | 0 | 0.625060049 | 0.312 | 0.072 |
| CD79A1      | 0 | 0.621210369 | 0.719 | 0.217 |
| TRIB11      | 0 | 0.619071734 | 0.456 | 0.114 |
| SPAG4       | 0 | 0.618776356 | 0.404 | 0.034 |
| HIST1H2BC   | 0 | 0.612823486 | 0.318 | 0.071 |
| KCNN3       | 0 | 0.610228323 | 0.324 | 0.013 |
| MEI1        | 0 | 0.579052531 | 0.403 | 0.102 |
| BHLHE41     | 0 | 0.55230612  | 0.375 | 0.049 |
| GAS61       | 0 | 0.54773051  | 0.335 | 0.052 |
| NUCB21      | 0 | 0.524274107 | 0.544 | 0.186 |
| CHST151     | 0 | 0.52194079  | 0.346 | 0.097 |
| U62317.4    | 0 | 0.507906725 | 0.347 | 0.041 |
| TRAM2       | 0 | 0.503377547 | 0.256 | 0.035 |
| SDC1        | 0 | 0.493464081 | 0.297 | 0.013 |
| CPNE5       | 0 | 0.492081325 | 0.349 | 0.036 |
| PLPP5       | 0 | 0.482497711 | 0.498 | 0.125 |
| Z93930.2    | 0 | 0.473102088 | 0.317 | 0.08  |
| C11orf80    | 0 | 0.471737212 | 0.317 | 0.071 |
| AC078883.1  | 0 | 0.448626486 | 0.271 | 0.045 |
| P2RX11      | 0 | 0.439279446 | 0.314 | 0.073 |
| MANEA       | 0 | 0.434066984 | 0.329 | 0.059 |
| NUGGC       | 0 | 0.430695637 | 0.261 | 0.029 |
| ST6GALNAC4  | 0 | 0.375345905 | 0.344 | 0.062 |
| MEF2B       | 0 | 0.356314582 | 0.309 | 0.039 |
| SRPRB       | 0 | 0.34965837  | 0.426 | 0.11  |
| CHST2       | 0 | 0.329053701 | 0.252 | 0.042 |
| PGM3        | 0 | 0.314962987 | 0.304 | 0.076 |

|            |           |             |       |       |
|------------|-----------|-------------|-------|-------|
| CHPF       | 0         | 0.293974948 | 0.276 | 0.026 |
| ARSA       | 0         | 0.291954108 | 0.332 | 0.068 |
| SELENOM    | 2.77E-305 | 0.328112993 | 0.479 | 0.158 |
| CEP1281    | 2.39E-303 | 1.391656827 | 0.558 | 0.23  |
| PIP5K1B    | 4.21E-293 | 0.538958104 | 0.289 | 0.074 |
| MANF       | 1.32E-291 | 0.583359791 | 0.559 | 0.219 |
| TPD521     | 1.17E-286 | 0.731500739 | 0.656 | 0.281 |
| CRELD2     | 1.90E-280 | 0.397537338 | 0.445 | 0.151 |
| ITGA6      | 1.05E-278 | 0.487489328 | 0.271 | 0.068 |
| SPCS2      | 9.22E-276 | 0.761781544 | 0.777 | 0.5   |
| PLCG21     | 7.93E-271 | 0.938427783 | 0.643 | 0.284 |
| RALGPS21   | 2.32E-269 | 0.477238818 | 0.564 | 0.215 |
| CASP101    | 1.67E-267 | 0.481780881 | 0.319 | 0.093 |
| LARGE11    | 1.02E-264 | 0.325910946 | 0.429 | 0.141 |
| TXNDC15    | 8.44E-264 | 0.353998073 | 0.467 | 0.166 |
| AL021155.5 | 1.99E-260 | 0.735214932 | 0.394 | 0.135 |
| HM131      | 6.71E-258 | 0.590109697 | 0.632 | 0.287 |
| AC016074.2 | 1.06E-253 | 0.624669935 | 0.329 | 0.1   |
| MEF2C1     | 1.24E-252 | 0.464864136 | 0.623 | 0.256 |
| SIL1       | 1.51E-250 | 0.382675597 | 0.499 | 0.189 |
| HIST1H2AC  | 2.19E-250 | 0.867877083 | 0.477 | 0.189 |
| PIK3CG     | 2.28E-250 | 0.564835913 | 0.415 | 0.149 |
| IGHA2      | 1.85E-246 | 4.99641205  | 0.268 | 0.079 |
| INSR1      | 1.57E-245 | 0.478208268 | 0.303 | 0.09  |
| ANKRD28    | 3.37E-240 | 1.61873169  | 0.713 | 0.443 |
| CLPTM1L    | 1.21E-239 | 0.3352415   | 0.448 | 0.164 |
| RAB301     | 1.76E-235 | 0.565478718 | 0.555 | 0.231 |
| FNDC3B1    | 1.59E-233 | 1.126462303 | 0.692 | 0.383 |
| TEX141     | 2.17E-230 | 1.629416854 | 0.557 | 0.284 |
| SEC61A1    | 1.42E-229 | 0.391208723 | 0.462 | 0.178 |
| LARP1B     | 1.53E-229 | 0.329903309 | 0.38  | 0.13  |
| Z93241.1   | 3.23E-228 | 0.445397864 | 0.276 | 0.081 |
| TP53INP11  | 5.79E-225 | 0.813299303 | 0.589 | 0.264 |
| PDIA4      | 1.31E-224 | 0.416584497 | 0.372 | 0.131 |
| EVI52      | 6.92E-223 | 0.440938689 | 0.459 | 0.177 |
| TMEM107    | 1.68E-217 | 0.566786266 | 0.414 | 0.162 |
| TXNDC111   | 2.84E-205 | 0.941027872 | 0.543 | 0.256 |
| MYDGF      | 2.54E-203 | 0.519943956 | 0.588 | 0.277 |
| AL162253.2 | 5.28E-200 | 0.395777293 | 0.282 | 0.09  |
| SPCS3      | 2.35E-192 | 0.541682347 | 0.688 | 0.373 |
| HDLBP      | 3.12E-191 | 0.659025401 | 0.608 | 0.297 |
| VOPP1      | 1.75E-190 | 0.920831506 | 0.706 | 0.409 |
| HERPUD11   | 4.84E-190 | 0.784347306 | 0.856 | 0.702 |



|            |           |             |       |       |
|------------|-----------|-------------|-------|-------|
| HSH2D1     | 4.71E-187 | 0.412243545 | 0.446 | 0.182 |
| HIST1H1C   | 5.42E-186 | 0.57924045  | 0.479 | 0.216 |
| TBCEL      | 6.20E-185 | 0.553955625 | 0.255 | 0.081 |
| STAP11     | 4.08E-179 | 0.680232133 | 0.298 | 0.105 |
| SEL1L31    | 5.83E-177 | 0.806147633 | 0.588 | 0.297 |
| TOR3A      | 1.06E-174 | 0.435006216 | 0.362 | 0.142 |
| THEMIS22   | 9.64E-173 | 0.327754587 | 0.422 | 0.173 |
| EIF2AK32   | 3.86E-169 | 0.814029659 | 0.636 | 0.348 |
| TSPAN13    | 2.57E-168 | 0.286617163 | 0.266 | 0.088 |
| CPEB41     | 1.67E-167 | 0.803817338 | 0.564 | 0.287 |
| UBE2J1     | 4.99E-165 | 0.501335504 | 0.584 | 0.296 |
| PRPSAP2    | 7.29E-165 | 0.814718402 | 0.293 | 0.109 |
| KDELR2     | 1.15E-164 | 0.312790178 | 0.482 | 0.213 |
| CARMIL11   | 1.50E-164 | 0.649989406 | 0.392 | 0.166 |
| CCDC88A1   | 7.86E-158 | 0.67301158  | 0.382 | 0.163 |
| OSBPL101   | 2.91E-157 | 0.408177304 | 0.324 | 0.123 |
| CDK142     | 1.03E-155 | 0.608169095 | 0.605 | 0.303 |
| GALNT21    | 3.08E-155 | 0.563472823 | 0.597 | 0.305 |
| KDELR1     | 1.27E-150 | 0.295310445 | 0.542 | 0.261 |
| HMCES      | 7.78E-148 | 0.334714922 | 0.425 | 0.186 |
| SEC24A1    | 4.21E-147 | 0.457758393 | 0.412 | 0.184 |
| AC012447.1 | 3.80E-140 | 0.8659881   | 0.34  | 0.149 |
| PECAM11    | 3.82E-134 | 0.271375295 | 0.32  | 0.13  |
| PIM22      | 3.08E-131 | 0.25470111  | 0.48  | 0.224 |
| TRIO2      | 3.00E-129 | 0.652412998 | 0.516 | 0.27  |
| DAP        | 1.29E-127 | 0.250124422 | 0.406 | 0.185 |
| FBH1       | 1.43E-124 | 0.257602132 | 0.308 | 0.127 |
| HIPK21     | 1.50E-119 | 0.649585565 | 0.636 | 0.372 |
| DENND1B    | 1.47E-118 | 0.77516172  | 0.591 | 0.343 |
| TVP23C     | 1.38E-117 | 0.339392101 | 0.347 | 0.155 |
| FHIT1      | 2.39E-116 | 0.357205597 | 0.335 | 0.149 |
| RABAC11    | 8.84E-114 | 0.432033155 | 0.686 | 0.44  |
| BTD2       | 4.92E-110 | 0.483656839 | 0.506 | 0.27  |
| PAPSS11    | 6.58E-108 | 0.262199026 | 0.365 | 0.172 |
| GMDS-DT    | 1.33E-101 | 0.399405798 | 0.432 | 0.22  |
| TRAM1      | 1.61E-98  | 0.320832328 | 0.637 | 0.384 |
| FNDC3A1    | 3.09E-98  | 0.774620851 | 0.714 | 0.514 |
| USP481     | 3.08E-95  | 0.466846723 | 0.614 | 0.365 |
| RPN2       | 5.54E-95  | 0.270160764 | 0.605 | 0.339 |
| PDIA6      | 4.35E-93  | 0.258859009 | 0.627 | 0.362 |
| BICD11     | 5.94E-88  | 0.320353885 | 0.431 | 0.225 |
| SPCS1      | 2.91E-86  | 0.449343895 | 0.687 | 0.482 |
| TENT5C2    | 7.06E-81  | 0.473503787 | 0.7   | 0.473 |

|           |             |             |       |       |
|-----------|-------------|-------------|-------|-------|
| EHMT11    | 2.86E-78    | 0.925939997 | 0.642 | 0.467 |
| OSBPL31   | 1.08E-77    | 0.379634264 | 0.555 | 0.333 |
| DUSP5     | 1.48E-75    | 0.34366766  | 0.44  | 0.248 |
| CDK62     | 1.62E-75    | 0.265940758 | 0.535 | 0.309 |
| XIST1     | 1.21E-72    | 0.466431342 | 0.381 | 0.202 |
| IGHM1     | 2.37E-68    | 4.182185946 | 0.361 | 0.204 |
| CYBA1     | 2.28E-67    | 0.306682437 | 0.888 | 0.835 |
| SEC61B    | 8.26E-66    | 0.517531213 | 0.736 | 0.556 |
| ERN12     | 2.42E-65    | 0.349548507 | 0.591 | 0.37  |
| PRDM13    | 5.53E-64    | 0.364414914 | 0.562 | 0.348 |
| KRTCAP2   | 1.77E-63    | 0.311735308 | 0.675 | 0.469 |
| NDUFAF61  | 9.22E-59    | 0.388711174 | 0.493 | 0.304 |
| RHBDD11   | 3.23E-57    | 0.333208725 | 0.402 | 0.233 |
| H1FX2     | 2.53E-54    | 0.357637866 | 0.582 | 0.401 |
| WWOX1     | 3.20E-49    | 0.38446558  | 0.527 | 0.341 |
| BCL2L111  | 1.37E-47    | 0.308941808 | 0.542 | 0.352 |
| LINC00910 | 3.33E-47    | 0.428876391 | 0.332 | 0.203 |
| EDEM12    | 3.76E-47    | 0.262850089 | 0.39  | 0.238 |
| FCHSD21   | 7.27E-47    | 0.553125076 | 0.592 | 0.416 |
| SND11     | 8.55E-43    | 0.419834972 | 0.634 | 0.441 |
| FBXW7     | 1.04E-42    | 0.709089773 | 0.712 | 0.556 |
| FAM214A2  | 4.79E-41    | 0.400977198 | 0.585 | 0.395 |
| FUT81     | 7.79E-39    | 0.368226968 | 0.55  | 0.371 |
| CYTOR2    | 1.58E-32    | 0.618123773 | 0.63  | 0.466 |
| MAN1A11   | 1.22E-31    | 0.35220667  | 0.614 | 0.446 |
| MDM2      | 4.18E-26    | 0.511813794 | 0.399 | 0.282 |
| WDR741    | 2.99E-20    | 0.283849372 | 0.495 | 0.376 |
| RAPGEF12  | 3.47E-12    | 0.354397418 | 0.715 | 0.601 |
| NCOA31    | 1.86E-11    | 0.343061146 | 0.666 | 0.541 |
| SQSTM1    | 0.000467914 | 0.611671056 | 0.727 | 0.687 |
| ITPR22    | 0.0006016   | 0.373559671 | 0.585 | 0.504 |
| APOE1     | 0           | 4.120457507 | 0.526 | 0.084 |
| SPP11     | 0           | 3.848936307 | 0.386 | 0.072 |
| C1QA1     | 0           | 3.650224021 | 0.639 | 0.078 |
| C1QB1     | 0           | 3.627961765 | 0.624 | 0.078 |
| CCL18     | 0           | 3.357546233 | 0.293 | 0.031 |
| MMP12     | 0           | 3.283629239 | 0.261 | 0.025 |
| APOC11    | 0           | 3.193069751 | 0.46  | 0.05  |
| C1QC1     | 0           | 3.030892176 | 0.585 | 0.05  |
| RNASE11   | 0           | 2.95067925  | 0.421 | 0.035 |
| FTL1      | 0           | 2.920972835 | 0.983 | 0.925 |
| CTSB1     | 0           | 2.902741513 | 0.735 | 0.259 |
| LYZ1      | 0           | 2.81620979  | 0.659 | 0.122 |

|           |   |             |       |       |
|-----------|---|-------------|-------|-------|
| CD141     | 0 | 2.454531489 | 0.569 | 0.073 |
| IFI301    | 0 | 2.441568291 | 0.826 | 0.217 |
| CTSZ1     | 0 | 2.410725714 | 0.803 | 0.319 |
| TYROBP1   | 0 | 2.397527106 | 0.677 | 0.17  |
| AIF11     | 0 | 2.348127729 | 0.665 | 0.131 |
| CST31     | 0 | 2.334999272 | 0.699 | 0.172 |
| PSAP1     | 0 | 2.314009261 | 0.775 | 0.403 |
| CD681     | 0 | 2.310557266 | 0.619 | 0.097 |
| MRC11     | 0 | 2.303297491 | 0.523 | 0.077 |
| FCER1G1   | 0 | 2.29803929  | 0.644 | 0.131 |
| SELENOP   | 0 | 2.270135738 | 0.281 | 0.025 |
| FCGR2A1   | 0 | 2.238542372 | 0.636 | 0.101 |
| MS4A6A1   | 0 | 2.234177071 | 0.588 | 0.088 |
| CTSL1     | 0 | 2.233222102 | 0.554 | 0.089 |
| GLUL1     | 0 | 2.154032327 | 0.663 | 0.211 |
| MAFB1     | 0 | 2.092288303 | 0.568 | 0.076 |
| FMNL21    | 0 | 2.05875805  | 0.573 | 0.103 |
| TMEM176B1 | 0 | 2.041168588 | 0.543 | 0.064 |
| GRN1      | 0 | 2.038666725 | 0.67  | 0.194 |
| GPNMB1    | 0 | 2.023926576 | 0.507 | 0.049 |
| FCGR3A1   | 0 | 1.975569797 | 0.565 | 0.088 |
| LRMDA1    | 0 | 1.948634657 | 0.582 | 0.095 |
| PLXDC21   | 0 | 1.934897636 | 0.6   | 0.111 |
| LGMN1     | 0 | 1.898828894 | 0.653 | 0.153 |
| MS4A71    | 0 | 1.895593392 | 0.594 | 0.088 |
| CD1631    | 0 | 1.87944017  | 0.534 | 0.063 |
| SLC16A101 | 0 | 1.877952445 | 0.524 | 0.131 |
| FCGRT1    | 0 | 1.870190156 | 0.612 | 0.148 |
| F13A11    | 0 | 1.844565353 | 0.337 | 0.037 |
| IGSF61    | 0 | 1.837773306 | 0.531 | 0.082 |
| NPC21     | 0 | 1.825107516 | 0.734 | 0.312 |
| FMN11     | 0 | 1.812841935 | 0.574 | 0.13  |
| MSR11     | 0 | 1.757015044 | 0.512 | 0.046 |
| HLA-DRA2  | 0 | 1.746816456 | 0.98  | 0.526 |
| HLA-DRB12 | 0 | 1.744208951 | 0.933 | 0.563 |
| CD742     | 0 | 1.736771347 | 0.986 | 0.713 |
| CAPG1     | 0 | 1.715912616 | 0.653 | 0.234 |
| HLA-DPA12 | 0 | 1.706764638 | 0.95  | 0.565 |
| DAB21     | 0 | 1.686627924 | 0.512 | 0.043 |
| RAB311    | 0 | 1.685758733 | 0.712 | 0.153 |
| PLD31     | 0 | 1.669924437 | 0.531 | 0.14  |
| SLC40A1   | 0 | 1.665125637 | 0.367 | 0.028 |
| CTSS1     | 0 | 1.657233228 | 0.849 | 0.489 |

|           |   |             |       |       |
|-----------|---|-------------|-------|-------|
| MARCKS1   | 0 | 1.654091188 | 0.69  | 0.164 |
| MS4A4A1   | 0 | 1.646737253 | 0.507 | 0.056 |
| PAPSS21   | 0 | 1.627984132 | 0.441 | 0.069 |
| CYBB2     | 0 | 1.622809504 | 0.732 | 0.173 |
| TGFBI1    | 0 | 1.598935376 | 0.539 | 0.085 |
| CXCL31    | 0 | 1.570184039 | 0.38  | 0.06  |
| SLCO2B11  | 0 | 1.553181837 | 0.493 | 0.038 |
| PMP221    | 0 | 1.546842932 | 0.52  | 0.063 |
| SLC8A11   | 0 | 1.517835841 | 0.567 | 0.103 |
| PLA2G71   | 0 | 1.516206099 | 0.416 | 0.043 |
| HMOX11    | 0 | 1.512217708 | 0.461 | 0.088 |
| TIMP21    | 0 | 1.48790466  | 0.579 | 0.127 |
| FGL21     | 0 | 1.480604799 | 0.544 | 0.126 |
| RBM471    | 0 | 1.477261408 | 0.685 | 0.171 |
| KCNMA11   | 0 | 1.466232061 | 0.384 | 0.037 |
| NRP11     | 0 | 1.463713982 | 0.497 | 0.06  |
| PLTP      | 0 | 1.456288185 | 0.373 | 0.034 |
| ABCA11    | 0 | 1.45100119  | 0.554 | 0.113 |
| CREG11    | 0 | 1.448971585 | 0.549 | 0.133 |
| TMEM176A1 | 0 | 1.432537425 | 0.457 | 0.051 |
| FOLR2     | 0 | 1.41574625  | 0.348 | 0.024 |
| IFITM31   | 0 | 1.40969654  | 0.567 | 0.175 |
| HLA-DPB12 | 0 | 1.40268102  | 0.947 | 0.587 |
| MERTK1    | 0 | 1.369965775 | 0.42  | 0.046 |
| DOCK41    | 0 | 1.366142812 | 0.637 | 0.144 |
| CTSH1     | 0 | 1.360825048 | 0.706 | 0.216 |
| KCTD121   | 0 | 1.35704665  | 0.52  | 0.073 |
| MFSD11    | 0 | 1.347980164 | 0.602 | 0.159 |
| ASAH11    | 0 | 1.322729776 | 0.664 | 0.239 |
| CXCL21    | 0 | 1.318791315 | 0.405 | 0.075 |
| TNS31     | 0 | 1.31723516  | 0.609 | 0.162 |
| GSN1      | 0 | 1.313230914 | 0.602 | 0.154 |
| C5AR11    | 0 | 1.30745176  | 0.517 | 0.083 |
| FPR31     | 0 | 1.29612739  | 0.477 | 0.059 |
| HLA-DQB12 | 0 | 1.293068888 | 0.892 | 0.413 |
| CSF1R1    | 0 | 1.291124572 | 0.504 | 0.064 |
| TREM21    | 0 | 1.290312514 | 0.356 | 0.025 |
| CXCL81    | 0 | 1.288972455 | 0.488 | 0.122 |
| SLC1A31   | 0 | 1.280978865 | 0.437 | 0.049 |
| SH3PXD2B1 | 0 | 1.267119151 | 0.478 | 0.062 |
| DAPK11    | 0 | 1.259660329 | 0.476 | 0.082 |
| PDGFC1    | 0 | 1.251372629 | 0.367 | 0.037 |
| CALHM62   | 0 | 1.251368765 | 0.487 | 0.114 |

|           |   |             |       |       |
|-----------|---|-------------|-------|-------|
| SPI11     | 0 | 1.243166412 | 0.597 | 0.12  |
| STAB11    | 0 | 1.236819809 | 0.417 | 0.036 |
| FRMD4A1   | 0 | 1.218911586 | 0.429 | 0.103 |
| LHFPL21   | 0 | 1.207682653 | 0.518 | 0.074 |
| VSIG41    | 0 | 1.2046858   | 0.361 | 0.035 |
| SPRED11   | 0 | 1.204369393 | 0.443 | 0.051 |
| SDS1      | 0 | 1.19570336  | 0.342 | 0.045 |
| CD861     | 0 | 1.159803427 | 0.634 | 0.135 |
| MITF1     | 0 | 1.148756045 | 0.401 | 0.037 |
| LNCAROD1  | 0 | 1.141806034 | 0.335 | 0.034 |
| HBEGF1    | 0 | 1.137648669 | 0.424 | 0.086 |
| NUPR1     | 0 | 1.123973407 | 0.257 | 0.024 |
| LST11     | 0 | 1.121472811 | 0.544 | 0.127 |
| CPVL1     | 0 | 1.110934306 | 0.461 | 0.072 |
| RASAL21   | 0 | 1.103173168 | 0.392 | 0.047 |
| TFEC1     | 0 | 1.102736143 | 0.536 | 0.083 |
| MNDA1     | 0 | 1.10045314  | 0.468 | 0.089 |
| DMXL21    | 0 | 1.096274857 | 0.506 | 0.082 |
| HLA-DMB2  | 0 | 1.081337538 | 0.682 | 0.227 |
| C15orf481 | 0 | 1.063472426 | 0.429 | 0.089 |
| CXCL161   | 0 | 1.054269843 | 0.472 | 0.083 |
| TMEM1631  | 0 | 1.048853767 | 0.406 | 0.087 |
| C3AR11    | 0 | 1.048114562 | 0.464 | 0.09  |
| FCHO21    | 0 | 1.047468867 | 0.476 | 0.087 |
| C1orf541  | 0 | 1.038485658 | 0.393 | 0.056 |
| HNMT1     | 0 | 1.037567221 | 0.446 | 0.045 |
| PSD31     | 0 | 1.032468773 | 0.406 | 0.089 |
| CLEC7A1   | 0 | 1.024697481 | 0.472 | 0.096 |
| LILRB41   | 0 | 1.022213394 | 0.428 | 0.056 |
| TNFSF131  | 0 | 1.019465659 | 0.42  | 0.064 |
| FNIP21    | 0 | 1.01830849  | 0.512 | 0.137 |
| CPM1      | 0 | 1.014655705 | 0.472 | 0.12  |
| ADAP21    | 0 | 1.012986435 | 0.462 | 0.058 |
| B3GNT51   | 0 | 1.008233213 | 0.448 | 0.11  |
| RASSF41   | 0 | 0.993043077 | 0.444 | 0.062 |
| SERPINA11 | 0 | 0.986978835 | 0.418 | 0.073 |
| SERPING11 | 0 | 0.981015579 | 0.36  | 0.046 |
| GM2A1     | 0 | 0.980066898 | 0.448 | 0.108 |
| SLC11A11  | 0 | 0.976833309 | 0.411 | 0.071 |
| BNC2      | 0 | 0.972154186 | 0.311 | 0.04  |
| STARD131  | 0 | 0.968803916 | 0.341 | 0.046 |
| C2        | 0 | 0.961678711 | 0.338 | 0.039 |
| ENPP21    | 0 | 0.954339863 | 0.353 | 0.052 |

|          |   |             |       |       |
|----------|---|-------------|-------|-------|
| SASH11   | 0 | 0.954268852 | 0.345 | 0.038 |
| COLEC12  | 0 | 0.944311246 | 0.261 | 0.019 |
| ITSN11   | 0 | 0.939184727 | 0.352 | 0.055 |
| EPB41L31 | 0 | 0.937249347 | 0.496 | 0.083 |
| GPR34    | 0 | 0.933964565 | 0.375 | 0.058 |
| TLR21    | 0 | 0.931156771 | 0.446 | 0.078 |
| RAB201   | 0 | 0.930076752 | 0.481 | 0.088 |
| SRGAP11  | 0 | 0.927947877 | 0.373 | 0.071 |
| PDK4     | 0 | 0.916278679 | 0.264 | 0.02  |
| MCTP11   | 0 | 0.912300368 | 0.526 | 0.114 |
| GNB41    | 0 | 0.910973817 | 0.459 | 0.103 |
| FUCA1    | 0 | 0.900632369 | 0.325 | 0.057 |
| TTYH31   | 0 | 0.900216027 | 0.474 | 0.082 |
| ETS21    | 0 | 0.894058124 | 0.523 | 0.141 |
| NRP21    | 0 | 0.885643278 | 0.396 | 0.055 |
| NPL1     | 0 | 0.882979864 | 0.426 | 0.073 |
| ZFH31    | 0 | 0.881804281 | 0.491 | 0.107 |
| LAIR11   | 0 | 0.877976534 | 0.47  | 0.102 |
| SLAMF81  | 0 | 0.867127313 | 0.372 | 0.04  |
| RGL11    | 0 | 0.863613484 | 0.369 | 0.053 |
| ADAM91   | 0 | 0.85991422  | 0.451 | 0.107 |
| RCAN11   | 0 | 0.859486784 | 0.338 | 0.059 |
| PLAUR1   | 0 | 0.85771834  | 0.569 | 0.142 |
| RAB131   | 0 | 0.847579811 | 0.392 | 0.068 |
| IL181    | 0 | 0.84666095  | 0.406 | 0.07  |
| PLAU1    | 0 | 0.845903771 | 0.34  | 0.048 |
| FCGR1A1  | 0 | 0.844990357 | 0.326 | 0.031 |
| EMILIN21 | 0 | 0.844251407 | 0.571 | 0.151 |
| SLC7A71  | 0 | 0.83915138  | 0.438 | 0.067 |
| SIRPA1   | 0 | 0.832433648 | 0.464 | 0.08  |
| MPEG11   | 0 | 0.822197511 | 0.406 | 0.07  |
| CD163L1  | 0 | 0.813958719 | 0.273 | 0.016 |
| NCF21    | 0 | 0.80958843  | 0.472 | 0.092 |
| SLC15A31 | 0 | 0.805141576 | 0.427 | 0.074 |
| FAM20A1  | 0 | 0.804944395 | 0.288 | 0.031 |
| SDC21    | 0 | 0.785460382 | 0.284 | 0.046 |
| KYNU1    | 0 | 0.784861516 | 0.69  | 0.172 |
| TMEM511  | 0 | 0.781891623 | 0.367 | 0.044 |
| MPP11    | 0 | 0.755241613 | 0.413 | 0.075 |
| CLIC21   | 0 | 0.754497218 | 0.292 | 0.047 |
| CYFIP11  | 0 | 0.74530189  | 0.436 | 0.094 |
| DST1     | 0 | 0.740285858 | 0.338 | 0.066 |
| THBD1    | 0 | 0.735845385 | 0.332 | 0.061 |

|           |   |             |       |       |
|-----------|---|-------------|-------|-------|
| RAB321    | 0 | 0.732403033 | 0.378 | 0.055 |
| LRP11     | 0 | 0.70578132  | 0.374 | 0.043 |
| PTAFR1    | 0 | 0.697930475 | 0.384 | 0.057 |
| JDP21     | 0 | 0.69781837  | 0.368 | 0.071 |
| WDFY31    | 0 | 0.689745654 | 0.392 | 0.064 |
| ALOX51    | 0 | 0.681795123 | 0.495 | 0.124 |
| IDH1      | 0 | 0.675808353 | 0.383 | 0.081 |
| LPCAT21   | 0 | 0.674654615 | 0.356 | 0.05  |
| SHTN11    | 0 | 0.674428597 | 0.345 | 0.055 |
| ADGRE21   | 0 | 0.672335614 | 0.359 | 0.07  |
| MMP141    | 0 | 0.669469901 | 0.324 | 0.034 |
| SLC31A11  | 0 | 0.666758585 | 0.353 | 0.067 |
| GAA1      | 0 | 0.664730487 | 0.391 | 0.07  |
| GAS2L31   | 0 | 0.654440084 | 0.297 | 0.036 |
| OSBPL1A1  | 0 | 0.653688314 | 0.348 | 0.05  |
| TSPAN41   | 0 | 0.648675448 | 0.323 | 0.036 |
| RIN21     | 0 | 0.643263812 | 0.358 | 0.065 |
| FGD41     | 0 | 0.642083713 | 0.531 | 0.123 |
| TCEAL91   | 0 | 0.629346926 | 0.303 | 0.047 |
| SLC7A8    | 0 | 0.628210444 | 0.268 | 0.019 |
| CD931     | 0 | 0.625688668 | 0.32  | 0.056 |
| ENG1      | 0 | 0.617996665 | 0.399 | 0.079 |
| AXL1      | 0 | 0.616224739 | 0.33  | 0.059 |
| SMIM251   | 0 | 0.612224855 | 0.33  | 0.047 |
| CPED11    | 0 | 0.606737827 | 0.308 | 0.05  |
| NEK61     | 0 | 0.602632295 | 0.415 | 0.08  |
| CREB51    | 0 | 0.600561107 | 0.371 | 0.071 |
| HCK1      | 0 | 0.590016838 | 0.448 | 0.091 |
| FAM20C1   | 0 | 0.588461572 | 0.316 | 0.035 |
| SLC31A21  | 0 | 0.570121244 | 0.358 | 0.071 |
| CLEC4A1   | 0 | 0.569644509 | 0.301 | 0.053 |
| ARHGAP221 | 0 | 0.563277016 | 0.304 | 0.039 |
| ITGAX1    | 0 | 0.563258557 | 0.446 | 0.103 |
| CMKLR11   | 0 | 0.55800061  | 0.275 | 0.022 |
| SIGLEC121 | 0 | 0.553437842 | 0.278 | 0.025 |
| TCN21     | 0 | 0.552730411 | 0.273 | 0.034 |
| CSF2RA1   | 0 | 0.548508623 | 0.428 | 0.088 |
| COLGALT11 | 0 | 0.546056756 | 0.373 | 0.075 |
| FPR11     | 0 | 0.542102615 | 0.39  | 0.075 |
| SDSL1     | 0 | 0.526329332 | 0.28  | 0.038 |
| NECTIN21  | 0 | 0.522082868 | 0.35  | 0.062 |
| TRPM21    | 0 | 0.518845165 | 0.329 | 0.06  |
| TLR41     | 0 | 0.506187826 | 0.316 | 0.044 |

|            |           |             |       |       |
|------------|-----------|-------------|-------|-------|
| ST3GAL61   | 0         | 0.500925191 | 0.29  | 0.045 |
| LRRC251    | 0         | 0.496176857 | 0.29  | 0.027 |
| SIGLEC1    | 0         | 0.493009814 | 0.268 | 0.019 |
| MRAS1      | 0         | 0.484504219 | 0.258 | 0.029 |
| OLFML2B1   | 0         | 0.475808221 | 0.265 | 0.022 |
| LILRB31    | 0         | 0.462929353 | 0.324 | 0.05  |
| CD300LF1   | 0         | 0.457467116 | 0.257 | 0.024 |
| VAT1       | 0         | 0.454984022 | 0.279 | 0.043 |
| ARHGEF10L1 | 0         | 0.445315084 | 0.265 | 0.029 |
| ETV5       | 0         | 0.443611928 | 0.263 | 0.032 |
| SORT11     | 0         | 0.436290003 | 0.271 | 0.034 |
| GASK1B1    | 0         | 0.429690831 | 0.268 | 0.035 |
| FHAD11     | 0         | 0.398935706 | 0.251 | 0.036 |
| OSCAR1     | 0         | 0.390943104 | 0.259 | 0.039 |
| LTBR1      | 0         | 0.375260733 | 0.268 | 0.034 |
| GLMP       | 3.18E-307 | 0.386227108 | 0.273 | 0.044 |
| ACP2       | 2.94E-304 | 0.480264814 | 0.268 | 0.043 |
| SIGLEC101  | 9.72E-304 | 0.477371706 | 0.311 | 0.057 |
| TNFRSF211  | 3.86E-303 | 0.568445405 | 0.301 | 0.054 |
| CCDC88A2   | 7.51E-303 | 0.929376016 | 0.554 | 0.164 |
| FBP11      | 3.97E-301 | 1.140803839 | 0.332 | 0.066 |
| DUSP31     | 1.50E-300 | 0.439600144 | 0.311 | 0.058 |
| OLR11      | 2.71E-300 | 0.703242181 | 0.336 | 0.065 |
| PILRA1     | 1.56E-299 | 0.650228466 | 0.445 | 0.109 |
| MOB3B2     | 7.29E-299 | 0.878532963 | 0.505 | 0.136 |
| SGK11      | 5.01E-297 | 1.325184921 | 0.594 | 0.203 |
| NHSL11     | 8.39E-297 | 0.707131613 | 0.29  | 0.052 |
| MCOLN11    | 2.12E-295 | 0.500993426 | 0.358 | 0.075 |
| SNX82      | 5.47E-295 | 1.162063337 | 0.619 | 0.202 |
| NCEH11     | 6.80E-294 | 0.536648389 | 0.352 | 0.073 |
| SLC43A31   | 9.29E-294 | 0.526420573 | 0.329 | 0.065 |
| HLA-DMA2   | 4.32E-293 | 1.227950844 | 0.783 | 0.351 |
| KIF13A1    | 7.13E-293 | 0.526868655 | 0.325 | 0.064 |
| HLA-DQA12  | 8.94E-293 | 1.236657195 | 0.863 | 0.4   |
| ACP51      | 1.79E-292 | 1.663884763 | 0.559 | 0.186 |
| TBXAS11    | 5.62E-290 | 0.944628716 | 0.577 | 0.185 |
| CTSD1      | 2.84E-288 | 2.780620807 | 0.682 | 0.355 |
| ITGAM1     | 1.52E-287 | 0.482538247 | 0.288 | 0.052 |
| RNASE62    | 1.78E-287 | 0.769708766 | 0.456 | 0.12  |
| ZNF804A1   | 2.32E-287 | 0.828688048 | 0.338 | 0.069 |
| MMP191     | 1.03E-285 | 0.613735568 | 0.253 | 0.041 |
| PLEK1      | 6.15E-285 | 0.722386734 | 0.588 | 0.179 |
| CD300A1    | 8.26E-285 | 0.609827596 | 0.36  | 0.079 |



|           |           |             |       |       |
|-----------|-----------|-------------|-------|-------|
| LILRB21   | 8.84E-285 | 0.447225808 | 0.27  | 0.047 |
| SERPINB61 | 9.93E-283 | 0.641576936 | 0.484 | 0.132 |
| TANC21    | 5.16E-281 | 1.008142038 | 0.453 | 0.121 |
| ADM1      | 3.39E-280 | 0.707784926 | 0.302 | 0.059 |
| RNF1301   | 1.16E-277 | 0.95971561  | 0.616 | 0.212 |
| KLF41     | 1.99E-277 | 0.982429848 | 0.415 | 0.105 |
| GRINA1    | 1.41E-276 | 0.545309393 | 0.417 | 0.104 |
| NAIP1     | 1.21E-275 | 0.488948396 | 0.355 | 0.077 |
| LY961     | 1.78E-275 | 0.912142036 | 0.516 | 0.159 |
| IER31     | 1.90E-274 | 1.542143318 | 0.597 | 0.212 |
| CFD       | 1.76E-273 | 1.080292558 | 0.481 | 0.137 |
| ICAM11    | 7.13E-272 | 0.861526554 | 0.563 | 0.177 |
| RRAGD1    | 8.48E-272 | 0.329529367 | 0.261 | 0.045 |
| UNC93B11  | 3.16E-271 | 0.695053684 | 0.461 | 0.128 |
| PXDC11    | 4.15E-271 | 0.508874838 | 0.305 | 0.06  |
| IL13RA12  | 5.53E-270 | 0.600563044 | 0.464 | 0.123 |
| ALCAM1    | 2.08E-268 | 1.245395211 | 0.673 | 0.266 |
| TNFSF13B1 | 4.79E-268 | 0.951546863 | 0.486 | 0.144 |
| ARHGAP181 | 6.07E-268 | 1.296000927 | 0.613 | 0.248 |
| BRI31     | 6.96E-268 | 1.51576408  | 0.679 | 0.327 |
| ACTN11    | 7.42E-268 | 0.568721912 | 0.423 | 0.107 |
| FCGR2B2   | 4.80E-267 | 0.787159691 | 0.44  | 0.12  |
| PLBD11    | 6.69E-267 | 0.484283909 | 0.336 | 0.072 |
| A2M1      | 1.87E-266 | 0.981829755 | 0.387 | 0.096 |
| BLVRB1    | 7.33E-266 | 0.970071256 | 0.496 | 0.154 |
| CTBP21    | 5.48E-265 | 0.556533213 | 0.37  | 0.085 |
| HEXB1     | 8.13E-264 | 0.839343583 | 0.505 | 0.156 |
| TNFAIP21  | 1.03E-263 | 0.561790399 | 0.344 | 0.075 |
| PEA151    | 1.03E-263 | 0.644022011 | 0.438 | 0.117 |
| SPIRE1    | 1.28E-260 | 0.416255768 | 0.275 | 0.051 |
| LGALS3BP1 | 1.70E-259 | 0.603865765 | 0.335 | 0.075 |
| BMP2K2    | 1.20E-258 | 0.886932471 | 0.599 | 0.207 |
| MMP91     | 4.38E-258 | 1.357591714 | 0.273 | 0.053 |
| BCAT11    | 1.01E-257 | 0.673099441 | 0.426 | 0.112 |
| TLR11     | 2.32E-257 | 0.39902189  | 0.343 | 0.077 |
| ATP6AP11  | 6.40E-257 | 0.812064678 | 0.487 | 0.151 |
| ALDH21    | 5.07E-255 | 0.706272742 | 0.388 | 0.096 |
| RHOQ2     | 1.57E-254 | 0.867877032 | 0.623 | 0.221 |
| HES11     | 1.64E-252 | 1.185101713 | 0.37  | 0.092 |
| CNTLN1    | 1.29E-251 | 0.394073949 | 0.256 | 0.046 |
| CEP1702   | 2.21E-250 | 0.902680602 | 0.639 | 0.239 |
| LY862     | 2.55E-250 | 0.583798041 | 0.494 | 0.143 |
| PPFIBP21  | 5.07E-249 | 0.56681328  | 0.368 | 0.089 |

|           |           |             |       |       |
|-----------|-----------|-------------|-------|-------|
| MGST21    | 1.11E-248 | 0.449317551 | 0.33  | 0.075 |
| GNS1      | 1.38E-248 | 0.782024973 | 0.509 | 0.16  |
| UBE2E22   | 4.86E-248 | 0.892770953 | 0.663 | 0.243 |
| SCARB21   | 2.09E-247 | 0.831364625 | 0.448 | 0.133 |
| CD91      | 1.00E-244 | 0.986804612 | 0.427 | 0.123 |
| LIPA1     | 2.96E-244 | 0.940660464 | 0.437 | 0.126 |
| IL1B1     | 5.41E-244 | 0.798008896 | 0.409 | 0.106 |
| CLIC42    | 1.37E-243 | 1.093291067 | 0.579 | 0.206 |
| SNX102    | 1.82E-242 | 0.856971352 | 0.546 | 0.185 |
| PLXND11   | 3.19E-242 | 0.38913378  | 0.301 | 0.063 |
| TNFRSF1A1 | 7.04E-242 | 0.407980438 | 0.345 | 0.082 |
| KIFC31    | 1.91E-240 | 0.326849371 | 0.262 | 0.05  |
| ATP6V1B21 | 9.29E-240 | 0.792905134 | 0.488 | 0.154 |
| RNF144B2  | 1.01E-239 | 0.634570144 | 0.531 | 0.163 |
| ST141     | 3.60E-239 | 0.471769767 | 0.312 | 0.069 |
| SYK2      | 5.08E-239 | 0.649598534 | 0.545 | 0.178 |
| SLC43A21  | 3.36E-236 | 0.558587236 | 0.453 | 0.129 |
| FGD21     | 5.92E-236 | 0.500428484 | 0.384 | 0.099 |
| Clorf1621 | 3.06E-235 | 0.983704959 | 0.492 | 0.155 |
| SBF21     | 1.31E-234 | 0.787552432 | 0.586 | 0.206 |
| CCR11     | 3.21E-234 | 0.394038714 | 0.285 | 0.059 |
| SCPEP12   | 4.92E-234 | 0.712963454 | 0.488 | 0.154 |
| ATP6V0A11 | 8.47E-234 | 0.609498133 | 0.394 | 0.106 |
| S100A91   | 1.27E-233 | 1.093477883 | 0.582 | 0.226 |
| NAGA1     | 6.82E-233 | 0.371746373 | 0.283 | 0.059 |
| CAMK11    | 1.12E-230 | 0.49340379  | 0.273 | 0.056 |
| BLVRA1    | 2.16E-227 | 0.568730872 | 0.379 | 0.101 |
| ABL21     | 9.99E-227 | 1.034332693 | 0.527 | 0.181 |
| AP2A21    | 1.37E-226 | 0.821172671 | 0.457 | 0.142 |
| CD632     | 3.88E-226 | 1.887468317 | 0.735 | 0.448 |
| NFIC1     | 4.29E-226 | 0.564296083 | 0.426 | 0.122 |
| CCL32     | 1.17E-225 | 1.378371737 | 0.448 | 0.141 |
| GOLIM41   | 2.28E-224 | 0.519631734 | 0.408 | 0.114 |
| CD402     | 3.88E-223 | 0.662242059 | 0.441 | 0.13  |
| KIAA09301 | 1.51E-222 | 0.441181014 | 0.323 | 0.077 |
| LGALS11   | 1.84E-222 | 1.559771465 | 0.775 | 0.446 |
| GNPDA1    | 4.30E-220 | 0.462019659 | 0.367 | 0.096 |
| IRAK31    | 4.76E-220 | 0.319788885 | 0.51  | 0.16  |
| TYMP1     | 1.03E-219 | 1.593541106 | 0.715 | 0.408 |
| IFNGR22   | 2.34E-219 | 0.693426338 | 0.576 | 0.209 |
| SPINT21   | 2.44E-219 | 0.664219941 | 0.464 | 0.145 |
| HLA-DOA1  | 6.41E-219 | 0.513305678 | 0.332 | 0.081 |
| VASH11    | 4.41E-218 | 0.37665284  | 0.264 | 0.055 |

|             |           |             |       |       |
|-------------|-----------|-------------|-------|-------|
| PHACTR12    | 1.80E-217 | 0.662973508 | 0.55  | 0.188 |
| PGD1        | 2.09E-216 | 0.574989285 | 0.428 | 0.129 |
| TREM11      | 2.79E-216 | 0.367625598 | 0.288 | 0.063 |
| ITPRIPL21   | 9.95E-216 | 0.345604572 | 0.251 | 0.05  |
| MAN2B11     | 2.26E-214 | 0.686687047 | 0.514 | 0.177 |
| GRK32       | 2.39E-214 | 0.635284799 | 0.531 | 0.178 |
| ZNF385A1    | 2.53E-214 | 0.395551613 | 0.261 | 0.055 |
| THEMIS23    | 1.56E-213 | 0.567755361 | 0.523 | 0.177 |
| PLEKHO21    | 2.11E-213 | 0.459480685 | 0.345 | 0.088 |
| MYO1E2      | 6.63E-213 | 1.005643066 | 0.524 | 0.185 |
| MB21D21     | 3.34E-212 | 0.706178345 | 0.425 | 0.127 |
| DSE1        | 7.68E-212 | 0.687854922 | 0.53  | 0.183 |
| TBC1D93     | 1.47E-210 | 0.656198798 | 0.425 | 0.126 |
| BCL2A11     | 2.84E-210 | 0.752584374 | 0.617 | 0.234 |
| CD832       | 5.61E-208 | 1.100679449 | 0.809 | 0.427 |
| FAM49A2     | 4.85E-207 | 0.72994693  | 0.675 | 0.265 |
| TCF7L21     | 7.33E-206 | 0.5620362   | 0.329 | 0.083 |
| AMPD31      | 1.55E-205 | 0.629913741 | 0.388 | 0.11  |
| CD151       | 2.76E-205 | 0.39903739  | 0.345 | 0.091 |
| ANXA21      | 4.15E-205 | 1.399756995 | 0.69  | 0.391 |
| VEGFA1      | 9.61E-205 | 0.613413073 | 0.338 | 0.087 |
| CD3021      | 2.47E-203 | 0.750682337 | 0.433 | 0.135 |
| AP2S11      | 5.91E-203 | 1.143603822 | 0.63  | 0.299 |
| CLIP21      | 2.28E-202 | 0.536265293 | 0.294 | 0.07  |
| IRF82       | 2.71E-202 | 0.643729713 | 0.609 | 0.223 |
| PLBD21      | 7.36E-202 | 0.337450631 | 0.275 | 0.062 |
| CORO1C1     | 1.13E-201 | 0.592203397 | 0.466 | 0.152 |
| EPB41L21    | 1.41E-201 | 0.736702342 | 0.453 | 0.146 |
| TBC1D121    | 1.26E-200 | 0.405430475 | 0.275 | 0.062 |
| PPT11       | 1.91E-200 | 0.801237011 | 0.509 | 0.185 |
| BTK2        | 1.99E-200 | 0.630374509 | 0.413 | 0.125 |
| PECAM12     | 1.58E-199 | 0.663760483 | 0.423 | 0.133 |
| GNAQ1       | 2.05E-199 | 0.974661623 | 0.569 | 0.231 |
| SCIMP       | 6.08E-199 | 0.479948702 | 0.336 | 0.088 |
| SNX24       | 4.36E-196 | 0.378458951 | 0.312 | 0.078 |
| CTSA1       | 5.59E-196 | 0.934300407 | 0.531 | 0.209 |
| SNAI11      | 1.01E-195 | 0.552637545 | 0.26  | 0.058 |
| SHB1        | 1.63E-194 | 0.513003614 | 0.289 | 0.07  |
| LAMP21      | 1.70E-194 | 0.876462019 | 0.547 | 0.224 |
| ANXA41      | 8.28E-194 | 0.506676822 | 0.408 | 0.125 |
| AL356124.11 | 2.34E-193 | 0.66114413  | 0.32  | 0.084 |
| SIPA1L21    | 2.07E-192 | 0.311343383 | 0.287 | 0.068 |
| AKR1B11     | 5.81E-192 | 0.651842204 | 0.411 | 0.131 |

|           |           |             |       |       |
|-----------|-----------|-------------|-------|-------|
| TPP11     | 8.78E-192 | 0.727857029 | 0.529 | 0.2   |
| SWAP701   | 2.26E-191 | 0.624257239 | 0.612 | 0.229 |
| MFSD121   | 2.70E-190 | 0.535210517 | 0.404 | 0.126 |
| 11-Mar    | 4.76E-189 | 0.381779027 | 0.557 | 0.196 |
| LGALS91   | 1.27E-188 | 0.762782907 | 0.492 | 0.176 |
| CIITA2    | 3.34E-188 | 0.513407629 | 0.458 | 0.147 |
| SGPL11    | 8.81E-188 | 0.549402643 | 0.381 | 0.114 |
| SAT12     | 1.07E-187 | 1.049951186 | 0.926 | 0.778 |
| SOD21     | 2.22E-187 | 1.131571808 | 0.815 | 0.555 |
| FTH11     | 2.75E-187 | 1.297989707 | 0.989 | 0.942 |
| PTPN121   | 1.24E-186 | 0.506330806 | 0.541 | 0.197 |
| GAS62     | 1.59E-186 | 0.337082127 | 0.267 | 0.063 |
| ZMIZ11    | 1.83E-186 | 0.531899382 | 0.471 | 0.159 |
| TUBB62    | 2.90E-186 | 0.530591405 | 0.452 | 0.146 |
| TRIO3     | 9.91E-186 | 0.653224644 | 0.658 | 0.273 |
| SCARB11   | 2.18E-185 | 0.44487601  | 0.297 | 0.076 |
| AGAP31    | 3.24E-185 | 0.476649005 | 0.353 | 0.1   |
| DPYSL21   | 7.01E-185 | 0.605884329 | 0.414 | 0.132 |
| GBA       | 7.38E-185 | 0.276246139 | 0.267 | 0.062 |
| SMIM30    | 3.38E-184 | 0.47024371  | 0.351 | 0.099 |
| NINJ11    | 1.08E-183 | 0.71380599  | 0.489 | 0.175 |
| TBC1D21   | 1.19E-183 | 0.361412346 | 0.255 | 0.058 |
| ANXA51    | 4.70E-183 | 1.088251969 | 0.705 | 0.391 |
| RHOB2     | 6.25E-182 | 0.973267909 | 0.554 | 0.23  |
| BAIAP21   | 7.63E-182 | 0.512125997 | 0.306 | 0.08  |
| MGAT11    | 3.72E-180 | 0.843097678 | 0.565 | 0.241 |
| OGFRL11   | 2.93E-178 | 0.722376621 | 0.567 | 0.224 |
| PLIN31    | 3.04E-178 | 0.530803575 | 0.401 | 0.128 |
| ABR1      | 3.79E-178 | 0.718347441 | 0.609 | 0.255 |
| FHIT2     | 1.05E-177 | 0.74419816  | 0.441 | 0.152 |
| DUSP61    | 1.82E-177 | 0.534335966 | 0.298 | 0.078 |
| ATP6V1F1  | 2.42E-177 | 1.160210292 | 0.7   | 0.406 |
| IL4I11    | 4.57E-177 | 0.592465524 | 0.345 | 0.1   |
| S100A111  | 4.72E-176 | 1.62440672  | 0.773 | 0.592 |
| SLC36A1   | 5.55E-176 | 0.349841008 | 0.254 | 0.059 |
| ATP6V0B1  | 8.57E-176 | 1.052097092 | 0.662 | 0.359 |
| APP2      | 9.31E-176 | 0.825860905 | 0.479 | 0.173 |
| RASGEF1B2 | 1.36E-175 | 0.916100119 | 0.73  | 0.364 |
| MYOF1     | 2.26E-175 | 0.41721423  | 0.282 | 0.071 |
| COMT1     | 1.79E-174 | 0.752203104 | 0.521 | 0.208 |
| DBNDD21   | 2.31E-174 | 0.398842269 | 0.325 | 0.09  |
| LRRK21    | 3.74E-173 | 0.394830294 | 0.276 | 0.07  |
| HLA-DQA22 | 3.87E-173 | 1.057469005 | 0.606 | 0.272 |

|             |           |             |       |       |
|-------------|-----------|-------------|-------|-------|
| LGALS31     | 4.06E-173 | 1.514388316 | 0.624 | 0.338 |
| YWHAH1      | 7.20E-173 | 0.97088572  | 0.586 | 0.268 |
| CD1091      | 8.42E-173 | 0.901268536 | 0.386 | 0.124 |
| AKR1A11     | 5.91E-171 | 0.831729106 | 0.538 | 0.228 |
| ACSL11      | 3.27E-170 | 0.37601283  | 0.574 | 0.234 |
| SLC38A6     | 3.52E-170 | 0.317926245 | 0.26  | 0.062 |
| OAZ21       | 3.58E-169 | 0.451307878 | 0.376 | 0.116 |
| PHC21       | 2.44E-168 | 0.574827617 | 0.393 | 0.128 |
| ATP6V0C1    | 3.67E-168 | 0.966218176 | 0.79  | 0.538 |
| PPM1L1      | 4.65E-168 | 0.517170327 | 0.351 | 0.104 |
| DRAM11      | 6.15E-168 | 0.551179298 | 0.396 | 0.128 |
| LYN2        | 1.52E-167 | 0.350657673 | 0.803 | 0.356 |
| CLCN7       | 2.42E-167 | 0.303188294 | 0.328 | 0.093 |
| SKAP22      | 5.37E-167 | 0.614515517 | 0.652 | 0.283 |
| GNG101      | 3.48E-165 | 0.65283758  | 0.504 | 0.197 |
| CPNE81      | 6.91E-165 | 0.393803372 | 0.328 | 0.094 |
| LAPTM52     | 7.64E-165 | 0.84986926  | 0.911 | 0.699 |
| CTTNBP2NL1  | 1.07E-164 | 0.350601422 | 0.273 | 0.07  |
| CTNND11     | 1.33E-164 | 0.511995412 | 0.407 | 0.134 |
| AL078604.41 | 9.66E-164 | 1.075610764 | 0.425 | 0.15  |
| TCEAL4      | 4.59E-163 | 0.364552337 | 0.371 | 0.116 |
| ARRB11      | 1.08E-161 | 0.309221658 | 0.256 | 0.064 |
| LACTB1      | 3.64E-161 | 0.494236324 | 0.445 | 0.156 |
| SYNGR22     | 6.90E-161 | 0.613418461 | 0.602 | 0.26  |
| SH2B32      | 1.64E-160 | 0.468040201 | 0.559 | 0.214 |
| SESTD12     | 1.31E-159 | 0.590863979 | 0.492 | 0.182 |
| QKI1        | 5.24E-159 | 1.010607629 | 0.77  | 0.492 |
| NAGK1       | 6.77E-159 | 0.768508087 | 0.453 | 0.17  |
| CTSC2       | 2.21E-158 | 1.538619331 | 0.684 | 0.418 |
| FKBP151     | 5.50E-158 | 0.38447523  | 0.355 | 0.11  |
| ATOX11      | 9.47E-158 | 1.029727272 | 0.556 | 0.256 |
| ASPH1       | 1.08E-157 | 0.501649728 | 0.406 | 0.139 |
| DDAH21      | 1.39E-157 | 0.426992279 | 0.386 | 0.127 |
| HSD17B4     | 2.49E-157 | 0.446153213 | 0.396 | 0.131 |
| IL1RN1      | 3.83E-157 | 0.743770445 | 0.279 | 0.075 |
| NFKBIE1     | 3.84E-157 | 0.420312499 | 0.341 | 0.105 |
| G0S21       | 1.75E-156 | 0.855314072 | 0.328 | 0.098 |
| RAB341      | 1.78E-156 | 0.251145653 | 0.254 | 0.064 |
| MEF2C2      | 1.80E-156 | 0.705418268 | 0.627 | 0.268 |
| ARRB21      | 1.22E-155 | 0.495740163 | 0.479 | 0.18  |
| MSRB2       | 2.12E-155 | 0.386017401 | 0.285 | 0.078 |
| C20orf1941  | 1.02E-154 | 0.41693839  | 0.344 | 0.105 |
| KMO1        | 2.29E-154 | 0.474962623 | 0.315 | 0.092 |

|           |           |             |       |       |
|-----------|-----------|-------------|-------|-------|
| MGLL1     | 5.42E-154 | 0.418444567 | 0.263 | 0.069 |
| ACER31    | 5.71E-153 | 0.663398422 | 0.496 | 0.197 |
| PTTG1IP1  | 3.26E-152 | 0.714117639 | 0.516 | 0.218 |
| GLA2      | 3.37E-151 | 0.711735366 | 0.504 | 0.206 |
| EGR3      | 7.27E-151 | 0.695071673 | 0.258 | 0.069 |
| GSAP2     | 7.73E-151 | 0.438676611 | 0.443 | 0.156 |
| LRRC231   | 1.08E-150 | 1.102327174 | 0.44  | 0.172 |
| HEXA2     | 1.85E-150 | 0.75670501  | 0.567 | 0.258 |
| KIF16B    | 2.68E-149 | 0.39786557  | 0.329 | 0.1   |
| CSTB1     | 5.47E-149 | 1.672251357 | 0.667 | 0.422 |
| CSTA1     | 5.76E-149 | 0.505572243 | 0.324 | 0.097 |
| DOCK7     | 1.81E-148 | 0.26607508  | 0.25  | 0.064 |
| GSTO11    | 4.53E-148 | 1.021577491 | 0.611 | 0.326 |
| PEAK12    | 4.65E-148 | 0.73323242  | 0.549 | 0.233 |
| FUCA21    | 4.79E-148 | 0.41699891  | 0.328 | 0.103 |
| TCEAL3    | 7.02E-148 | 0.267676568 | 0.267 | 0.071 |
| CD801     | 2.33E-147 | 0.384970297 | 0.337 | 0.104 |
| SDCCAG82  | 2.50E-147 | 0.610137302 | 0.56  | 0.241 |
| LILRB11   | 3.31E-147 | 0.304567749 | 0.272 | 0.075 |
| ARHGAP211 | 4.17E-147 | 0.54402351  | 0.381 | 0.13  |
| NCOA41    | 4.20E-147 | 0.682632391 | 0.536 | 0.229 |
| FRMD4B2   | 8.75E-146 | 0.794364708 | 0.473 | 0.189 |
| OPN31     | 2.62E-145 | 0.312903373 | 0.261 | 0.07  |
| LAMP11    | 8.49E-145 | 0.763088391 | 0.596 | 0.292 |
| NUDT161   | 1.85E-144 | 0.353883517 | 0.303 | 0.09  |
| METTL7A1  | 1.27E-143 | 0.419272692 | 0.283 | 0.082 |
| PIK3AP12  | 4.62E-143 | 0.420681034 | 0.522 | 0.204 |
| AP1B11    | 5.06E-143 | 0.532192415 | 0.554 | 0.234 |
| PLXNC11   | 1.38E-142 | 0.433181643 | 0.438 | 0.165 |
| CD812     | 2.87E-142 | 1.154447343 | 0.76  | 0.515 |
| MPZL11    | 4.55E-141 | 0.298557373 | 0.285 | 0.082 |
| SRGAP2B1  | 5.73E-140 | 0.460110882 | 0.371 | 0.127 |
| LAT22     | 1.95E-139 | 0.365654766 | 0.45  | 0.168 |
| MKNK11    | 3.14E-139 | 0.366569029 | 0.401 | 0.142 |
| PARVB2    | 1.26E-138 | 0.517965312 | 0.559 | 0.239 |
| PPARD2    | 8.58E-138 | 0.51119296  | 0.525 | 0.217 |
| DNASE2    | 9.95E-138 | 0.544861806 | 0.375 | 0.134 |
| PYCARD1   | 8.60E-137 | 0.749988291 | 0.549 | 0.256 |
| GABARAP1  | 4.39E-136 | 0.889511577 | 0.813 | 0.577 |
| ALAS11    | 3.94E-135 | 0.397101276 | 0.293 | 0.088 |
| PLEKHO12  | 6.03E-135 | 0.587888767 | 0.554 | 0.244 |
| BCKDK1    | 1.73E-134 | 0.278550692 | 0.254 | 0.071 |
| ARHGAP101 | 9.07E-134 | 0.747334665 | 0.455 | 0.182 |

|           |           |             |       |       |
|-----------|-----------|-------------|-------|-------|
| SUSD11    | 9.69E-134 | 0.266204094 | 0.257 | 0.072 |
| KIF1B1    | 2.11E-133 | 1.031311963 | 0.541 | 0.258 |
| CTNNA11   | 4.70E-133 | 0.507079322 | 0.511 | 0.215 |
| SMCO41    | 1.14E-132 | 0.355055203 | 0.315 | 0.1   |
| FGR1      | 3.79E-132 | 0.290543031 | 0.28  | 0.083 |
| FUOM1     | 4.08E-132 | 0.476729573 | 0.358 | 0.126 |
| TCF41     | 5.08E-132 | 0.33858889  | 0.598 | 0.258 |
| TIMP11    | 8.18E-132 | 0.892377371 | 0.515 | 0.228 |
| EVI53     | 1.14E-131 | 0.483711304 | 0.463 | 0.186 |
| PRDX11    | 2.28E-131 | 1.024296382 | 0.765 | 0.558 |
| EPAS11    | 3.16E-131 | 0.510305298 | 0.365 | 0.129 |
| FLOT11    | 3.23E-131 | 0.429346785 | 0.488 | 0.198 |
| SEMA4A1   | 2.98E-130 | 1.121052657 | 0.401 | 0.154 |
| ZNF7101   | 8.82E-130 | 0.369411342 | 0.361 | 0.126 |
| ERRFI1    | 1.32E-128 | 0.553490195 | 0.266 | 0.079 |
| PDXK1     | 2.08E-128 | 0.682163422 | 0.544 | 0.261 |
| NQO21     | 3.39E-128 | 0.429110561 | 0.344 | 0.117 |
| GAB22     | 6.69E-128 | 0.468224916 | 0.657 | 0.319 |
| BASP11    | 9.53E-128 | 0.348081252 | 0.61  | 0.284 |
| HLA-DRB52 | 1.20E-127 | 1.276814288 | 0.506 | 0.234 |
| TEC       | 2.29E-127 | 0.365208535 | 0.289 | 0.09  |
| ADA21     | 3.55E-127 | 0.47297065  | 0.413 | 0.16  |
| SLC16A31  | 1.00E-126 | 0.505999846 | 0.544 | 0.243 |
| LPAR6     | 1.32E-126 | 0.445113957 | 0.411 | 0.156 |
| WDFY41    | 3.25E-126 | 0.362493196 | 0.446 | 0.172 |
| CPPED11   | 7.20E-126 | 0.320699788 | 0.32  | 0.105 |
| LATS21    | 9.34E-126 | 0.325881054 | 0.315 | 0.103 |
| PEPD      | 2.49E-125 | 0.406754871 | 0.42  | 0.162 |
| CPQ1      | 3.53E-125 | 0.394639972 | 0.504 | 0.207 |
| ABHD121   | 7.95E-125 | 0.558102295 | 0.467 | 0.195 |
| M6PR1     | 4.43E-124 | 0.641315135 | 0.574 | 0.279 |
| TENT5A1   | 8.16E-124 | 0.652355946 | 0.318 | 0.108 |
| CNDP21    | 1.30E-123 | 0.484464225 | 0.484 | 0.206 |
| SLC25A24  | 1.98E-123 | 0.365620907 | 0.401 | 0.149 |
| RNF131    | 2.21E-123 | 0.542279837 | 0.618 | 0.311 |
| SH3BP52   | 2.50E-123 | 0.529964467 | 0.614 | 0.297 |
| SLC8B11   | 3.04E-123 | 0.373147398 | 0.326 | 0.11  |
| CD591     | 5.59E-123 | 0.785218684 | 0.482 | 0.223 |
| ATF51     | 8.48E-123 | 0.439507833 | 0.332 | 0.115 |
| NCF4      | 1.39E-122 | 0.424349118 | 0.458 | 0.185 |
| H2AFY1    | 2.38E-122 | 0.788858789 | 0.608 | 0.316 |
| PAK12     | 3.71E-122 | 0.360813331 | 0.451 | 0.178 |
| CYBA2     | 1.12E-121 | 0.763711026 | 0.921 | 0.836 |

|           |           |             |       |       |
|-----------|-----------|-------------|-------|-------|
| RAC11     | 3.47E-121 | 0.886132146 | 0.757 | 0.536 |
| LYL11     | 3.58E-121 | 0.287876337 | 0.301 | 0.097 |
| GPX41     | 4.34E-121 | 0.819013738 | 0.747 | 0.476 |
| ZNF4381   | 4.65E-121 | 0.363802854 | 0.36  | 0.129 |
| LITAF1    | 1.11E-120 | 0.602269594 | 0.784 | 0.525 |
| TPD52L21  | 3.80E-119 | 0.285089141 | 0.35  | 0.124 |
| PRKAG21   | 1.07E-118 | 0.571917103 | 0.576 | 0.274 |
| ATP6V1C11 | 1.15E-118 | 0.373506039 | 0.414 | 0.16  |
| SRGAP22   | 2.01E-118 | 0.552842081 | 0.561 | 0.263 |
| ZFYVE161  | 4.07E-118 | 0.410438816 | 0.51  | 0.219 |
| EVA1B     | 7.69E-118 | 0.280457841 | 0.265 | 0.082 |
| TUBB1     | 3.08E-117 | 0.687117105 | 0.559 | 0.275 |
| TPRA11    | 6.59E-117 | 0.339176547 | 0.301 | 0.101 |
| NUCB11    | 1.66E-116 | 0.599038171 | 0.525 | 0.246 |
| EIF4EBP11 | 2.61E-116 | 0.353178313 | 0.354 | 0.13  |
| GRASP2    | 7.85E-116 | 0.326033204 | 0.54  | 0.229 |
| SAMD4A1   | 1.14E-115 | 0.452950071 | 0.362 | 0.134 |
| CDK2AP11  | 1.45E-115 | 0.355878041 | 0.285 | 0.092 |
| CLN81     | 8.29E-115 | 0.383234909 | 0.373 | 0.139 |
| PCBD1     | 1.65E-114 | 0.407599105 | 0.348 | 0.127 |
| HCFC1R1   | 8.43E-114 | 0.300669437 | 0.293 | 0.097 |
| VAMP81    | 1.60E-112 | 1.016736089 | 0.675 | 0.472 |
| ALPK1     | 1.74E-111 | 0.285621426 | 0.298 | 0.1   |
| PTMS1     | 2.80E-110 | 0.600904717 | 0.499 | 0.23  |
| VEGFB1    | 7.50E-110 | 0.379338714 | 0.461 | 0.197 |
| SOAT11    | 1.09E-109 | 0.459953132 | 0.455 | 0.195 |
| DUSP23    | 2.19E-109 | 0.2501749   | 0.31  | 0.107 |
| TFPT      | 3.40E-109 | 0.301211088 | 0.305 | 0.105 |
| RIPK21    | 3.88E-109 | 0.544517552 | 0.445 | 0.189 |
| UPP11     | 6.08E-109 | 0.614755055 | 0.51  | 0.238 |
| PKM2      | 1.41E-108 | 0.725797534 | 0.686 | 0.415 |
| LAMTOR21  | 2.21E-108 | 0.549726224 | 0.501 | 0.236 |
| CCL3L11   | 4.38E-108 | 0.647836655 | 0.273 | 0.092 |
| ARPC51    | 2.52E-107 | 0.761464421 | 0.75  | 0.515 |
| QSOX11    | 2.73E-107 | 0.271549316 | 0.312 | 0.11  |
| ZYX1      | 3.18E-107 | 0.394129993 | 0.379 | 0.148 |
| GPR137B1  | 6.44E-107 | 0.544068251 | 0.494 | 0.229 |
| HAVCR22   | 6.93E-107 | 0.328317996 | 0.473 | 0.203 |
| SLC39A1   | 7.08E-107 | 0.268857328 | 0.305 | 0.106 |
| ATP6AP21  | 9.94E-107 | 0.721722923 | 0.558 | 0.307 |
| HSBP11    | 1.15E-106 | 0.566167071 | 0.534 | 0.259 |
| SPG211    | 1.22E-106 | 0.320598343 | 0.379 | 0.148 |
| NAMPT1    | 1.46E-106 | 0.509019312 | 0.76  | 0.538 |



|           |           |             |       |       |
|-----------|-----------|-------------|-------|-------|
| ARL8A     | 1.56E-106 | 0.326966338 | 0.342 | 0.126 |
| CRTAP     | 1.77E-106 | 0.287884055 | 0.33  | 0.119 |
| TALDO11   | 1.85E-106 | 0.727169362 | 0.575 | 0.312 |
| SNTB11    | 2.02E-106 | 0.453393553 | 0.283 | 0.096 |
| YBX11     | 2.59E-106 | 0.710064399 | 0.896 | 0.771 |
| KLF101    | 4.52E-106 | 0.376563178 | 0.343 | 0.129 |
| NEDD4L1   | 1.10E-105 | 0.296365    | 0.289 | 0.099 |
| SLC11A21  | 1.68E-105 | 0.380957916 | 0.329 | 0.121 |
| PDIA41    | 2.40E-105 | 0.395567745 | 0.357 | 0.139 |
| MXD11     | 7.32E-105 | 0.511712631 | 0.526 | 0.254 |
| LIMS11    | 7.44E-105 | 0.771983233 | 0.72  | 0.475 |
| DOP1B     | 1.25E-104 | 0.374845115 | 0.264 | 0.086 |
| SLC45A41  | 1.54E-104 | 0.531667782 | 0.366 | 0.146 |
| NME21     | 1.58E-104 | 0.699174497 | 0.833 | 0.611 |
| PLSCR11   | 1.60E-104 | 0.415206038 | 0.555 | 0.258 |
| FEZ2      | 2.38E-104 | 0.31232897  | 0.34  | 0.126 |
| IRAK21    | 2.86E-104 | 0.329493273 | 0.428 | 0.178 |
| STX41     | 5.05E-104 | 0.364680633 | 0.425 | 0.178 |
| MANBA2    | 7.87E-104 | 0.455195881 | 0.648 | 0.332 |
| ATP6V0D11 | 1.79E-103 | 0.503987064 | 0.578 | 0.292 |
| SLC66A21  | 2.04E-103 | 0.32485243  | 0.435 | 0.182 |
| DENND32   | 1.37E-102 | 0.300281977 | 0.416 | 0.171 |
| P4HA11    | 3.40E-102 | 0.673705507 | 0.579 | 0.299 |
| PTPN6     | 4.42E-102 | 0.391754361 | 0.504 | 0.227 |
| NTAN1     | 7.78E-102 | 0.358781618 | 0.33  | 0.123 |
| MGST3     | 1.14E-101 | 0.690888769 | 0.564 | 0.306 |
| PLEKHM22  | 2.14E-101 | 0.377988639 | 0.494 | 0.222 |
| VAMP31    | 3.50E-101 | 0.298405877 | 0.308 | 0.112 |
| CD722     | 4.75E-101 | 0.312261733 | 0.393 | 0.156 |
| IFNGR12   | 9.73E-101 | 0.533356394 | 0.57  | 0.286 |
| PTPN91    | 1.76E-100 | 0.293254413 | 0.313 | 0.114 |
| CANX1     | 3.97E-100 | 0.715098723 | 0.625 | 0.374 |
| STX71     | 5.58E-99  | 0.375684531 | 0.518 | 0.239 |
| NXF1      | 1.11E-98  | 0.508250792 | 0.431 | 0.19  |
| RNH11     | 4.66E-98  | 0.624517727 | 0.584 | 0.322 |
| ACTB1     | 6.37E-98  | 0.778924862 | 0.96  | 0.887 |
| USP6NL1   | 1.95E-97  | 0.386982618 | 0.335 | 0.128 |
| RAB7A1    | 2.05E-97  | 0.88600607  | 0.805 | 0.596 |
| GAS72     | 3.56E-97  | 0.430833415 | 0.355 | 0.14  |
| TOM11     | 4.38E-97  | 0.432816437 | 0.504 | 0.237 |
| AGPAT2    | 6.14E-97  | 0.260846084 | 0.324 | 0.121 |
| 21-Mar    | 7.55E-97  | 0.329705293 | 0.322 | 0.121 |
| TMBIM1    | 7.59E-97  | 0.32618004  | 0.342 | 0.131 |

|           |          |             |       |       |
|-----------|----------|-------------|-------|-------|
| CBR1      | 8.96E-97 | 0.280779292 | 0.323 | 0.121 |
| SLC39A111 | 1.73E-96 | 0.550039789 | 0.509 | 0.247 |
| IL3RA1    | 2.44E-96 | 0.36404519  | 0.279 | 0.099 |
| KLHL62    | 4.60E-96 | 0.547164895 | 0.529 | 0.265 |
| ITGA51    | 5.40E-96 | 0.349850214 | 0.298 | 0.107 |
| RGS191    | 6.27E-96 | 0.403904577 | 0.466 | 0.208 |
| ANKS1A1   | 9.98E-96 | 0.395785797 | 0.422 | 0.184 |
| TSPAN331  | 1.74E-95 | 0.319060443 | 0.291 | 0.104 |
| TNFSF12   | 3.00E-95 | 0.337995594 | 0.364 | 0.146 |
| P2RX41    | 3.25E-95 | 0.315009042 | 0.336 | 0.131 |
| CD43      | 4.48E-95 | 0.488937955 | 0.476 | 0.221 |
| PTPRE1    | 1.26E-94 | 0.40972643  | 0.451 | 0.203 |
| HSD17B12  | 1.65E-94 | 0.274537321 | 0.309 | 0.115 |
| TFRC1     | 1.90E-94 | 0.86914222  | 0.616 | 0.359 |
| STK31     | 4.70E-94 | 0.361854504 | 0.388 | 0.162 |
| ITGB22    | 9.94E-94 | 0.895183127 | 0.588 | 0.363 |
| SLC17A51  | 1.42E-93 | 0.281654289 | 0.288 | 0.104 |
| PRDX3     | 2.06E-93 | 0.333036127 | 0.376 | 0.155 |
| TPM41     | 2.69E-93 | 0.732591959 | 0.684 | 0.448 |
| RREB12    | 7.70E-93 | 0.38836209  | 0.487 | 0.227 |
| GLIPR21   | 1.10E-92 | 0.428436125 | 0.404 | 0.175 |
| EFHD21    | 1.51E-92 | 0.671168711 | 0.609 | 0.346 |
| GNA151    | 2.55E-92 | 0.387743975 | 0.395 | 0.166 |
| FABP51    | 3.37E-92 | 1.027565051 | 0.602 | 0.348 |
| LRRK11    | 3.53E-92 | 0.259074349 | 0.275 | 0.099 |
| PDE4DIP1  | 5.75E-92 | 0.317679833 | 0.358 | 0.145 |
| SPART1    | 6.49E-92 | 0.269014563 | 0.308 | 0.115 |
| ATP1B11   | 8.82E-92 | 0.42875205  | 0.368 | 0.155 |
| APLP21    | 9.79E-92 | 0.643715895 | 0.647 | 0.401 |
| VAV21     | 2.85E-91 | 0.296611325 | 0.267 | 0.095 |
| SMIM31    | 2.86E-91 | 0.275752657 | 0.269 | 0.094 |
| ARHGAP311 | 4.15E-91 | 0.309701425 | 0.361 | 0.146 |
| TSPAN31   | 2.37E-90 | 0.29575752  | 0.331 | 0.131 |
| CREBL2    | 2.58E-90 | 0.348486761 | 0.322 | 0.124 |
| TCIRG11   | 5.05E-90 | 0.286042025 | 0.415 | 0.182 |
| CAT1      | 5.25E-90 | 0.303774152 | 0.324 | 0.126 |
| GADD45G   | 9.55E-90 | 0.443673898 | 0.271 | 0.098 |
| LEPROT    | 1.23E-89 | 0.293930896 | 0.363 | 0.15  |
| PTPN18    | 1.85E-89 | 0.269853255 | 0.389 | 0.162 |
| RASGRP32  | 3.68E-89 | 0.364171427 | 0.359 | 0.149 |
| SLC25A131 | 6.39E-89 | 0.270707537 | 0.396 | 0.168 |
| SLC2A131  | 7.38E-89 | 0.282930829 | 0.313 | 0.12  |
| GNAI21    | 1.07E-88 | 0.633756911 | 0.757 | 0.54  |

|          |          |             |       |       |
|----------|----------|-------------|-------|-------|
| SNX271   | 1.13E-88 | 0.251176439 | 0.3   | 0.113 |
| SDCBP1   | 1.42E-88 | 0.594422352 | 0.788 | 0.559 |
| NFIL32   | 3.93E-88 | 0.343275695 | 0.461 | 0.213 |
| OTUD12   | 4.74E-88 | 0.546015211 | 0.451 | 0.214 |
| GSTP11   | 5.33E-88 | 0.634796558 | 0.69  | 0.455 |
| TUBA1B1  | 5.83E-88 | 0.762544923 | 0.784 | 0.56  |
| CHCHD101 | 1.65E-87 | 0.507885715 | 0.641 | 0.368 |
| PPIF1    | 1.99E-87 | 0.291380544 | 0.37  | 0.154 |
| FOXO31   | 2.40E-87 | 0.497053181 | 0.614 | 0.333 |
| VASP1    | 7.55E-87 | 0.428355809 | 0.611 | 0.328 |
| SAV12    | 9.24E-87 | 0.405528076 | 0.356 | 0.149 |
| GPD21    | 2.69E-86 | 0.30286745  | 0.332 | 0.133 |
| NR4A22   | 2.73E-86 | 0.845766482 | 0.752 | 0.511 |
| CHKA1    | 4.73E-86 | 0.350138532 | 0.44  | 0.202 |
| VKORC1   | 7.53E-86 | 0.324551528 | 0.41  | 0.184 |
| P4HB1    | 2.18E-85 | 0.626309478 | 0.576 | 0.339 |
| AP1S21   | 2.25E-85 | 0.450452776 | 0.429 | 0.197 |
| TEX142   | 2.66E-85 | 0.674067132 | 0.546 | 0.294 |
| NFKBID2  | 3.14E-85 | 0.528868661 | 0.456 | 0.218 |
| PFKL     | 8.88E-85 | 0.284986832 | 0.349 | 0.144 |
| FERMT31  | 9.19E-85 | 0.454017107 | 0.479 | 0.233 |
| ZFAND52  | 1.23E-84 | 0.780245043 | 0.72  | 0.485 |
| VIM2     | 1.24E-84 | 0.764114643 | 0.903 | 0.761 |
| JOSD2    | 1.88E-84 | 0.296502102 | 0.33  | 0.133 |
| BCAP31   | 3.70E-84 | 0.535805328 | 0.506 | 0.267 |
| BAG32    | 4.18E-84 | 0.897086354 | 0.48  | 0.255 |
| NAAA1    | 5.43E-84 | 0.309359603 | 0.34  | 0.138 |
| LAP31    | 8.58E-84 | 0.678922407 | 0.565 | 0.319 |
| RNASET23 | 8.83E-84 | 0.565081845 | 0.793 | 0.549 |
| RAPH11   | 9.44E-84 | 0.335553369 | 0.277 | 0.104 |
| CALU     | 1.41E-83 | 0.3644174   | 0.433 | 0.203 |
| SLC12A71 | 1.42E-83 | 0.285066864 | 0.253 | 0.09  |
| EHBP1L11 | 2.43E-83 | 0.274516146 | 0.372 | 0.159 |
| VAC14    | 3.78E-83 | 0.290521876 | 0.323 | 0.13  |
| RP21     | 3.83E-83 | 0.309543099 | 0.315 | 0.125 |
| ACSL31   | 4.99E-83 | 0.509751097 | 0.535 | 0.277 |
| C9orf722 | 5.87E-83 | 0.326103071 | 0.513 | 0.252 |
| SH3BP21  | 1.31E-82 | 0.258223627 | 0.268 | 0.099 |
| IER51    | 2.12E-82 | 0.812321131 | 0.656 | 0.421 |
| EIF4A11  | 2.39E-82 | 0.576235084 | 0.866 | 0.717 |
| ADPGK1   | 2.54E-82 | 0.263602492 | 0.469 | 0.217 |
| CNPY31   | 3.05E-82 | 0.334842765 | 0.509 | 0.247 |
| RIN32    | 5.59E-82 | 0.257462931 | 0.521 | 0.248 |

|             |          |             |       |       |
|-------------|----------|-------------|-------|-------|
| TET32       | 5.92E-82 | 0.295035428 | 0.397 | 0.176 |
| TNFRSF10D1  | 7.46E-82 | 0.442241065 | 0.326 | 0.136 |
| S100A102    | 1.17E-81 | 0.924344425 | 0.785 | 0.598 |
| ATG71       | 1.56E-81 | 0.46053956  | 0.609 | 0.344 |
| GNA122      | 1.88E-81 | 0.333619875 | 0.549 | 0.276 |
| ACOT13      | 1.04E-80 | 0.256173336 | 0.34  | 0.141 |
| NCOR21      | 3.47E-80 | 0.323002251 | 0.491 | 0.237 |
| GIPC1       | 4.27E-80 | 0.475738083 | 0.277 | 0.107 |
| CDKN1A1     | 4.32E-80 | 0.379813924 | 0.503 | 0.251 |
| KLF72       | 5.83E-80 | 0.271981565 | 0.381 | 0.166 |
| LAMTOR11    | 6.27E-80 | 0.476593332 | 0.526 | 0.28  |
| TULP21      | 6.32E-80 | 0.422686463 | 0.325 | 0.137 |
| GUSB        | 6.63E-80 | 0.348369649 | 0.391 | 0.177 |
| EEPD11      | 1.61E-79 | 0.308609313 | 0.272 | 0.104 |
| SUMF11      | 1.74E-79 | 0.337865347 | 0.471 | 0.226 |
| TUBA1C2     | 3.44E-79 | 0.581584363 | 0.589 | 0.338 |
| RASSF22     | 3.70E-79 | 0.2919825   | 0.396 | 0.178 |
| WARS1       | 1.10E-78 | 0.382404144 | 0.311 | 0.128 |
| AHCYL11     | 1.33E-78 | 0.298949037 | 0.38  | 0.17  |
| SMS1        | 1.42E-78 | 0.349791685 | 0.482 | 0.235 |
| TUBGCP21    | 2.31E-78 | 0.273026942 | 0.383 | 0.169 |
| CUX11       | 2.55E-78 | 0.337670966 | 0.668 | 0.379 |
| DRAM21      | 2.96E-78 | 0.366364188 | 0.456 | 0.22  |
| RAP2B       | 3.29E-78 | 0.411814196 | 0.418 | 0.194 |
| MEF2A1      | 3.93E-78 | 0.460894958 | 0.687 | 0.408 |
| SQOR1       | 4.18E-78 | 0.330082901 | 0.405 | 0.187 |
| SNX292      | 4.75E-78 | 0.435240555 | 0.627 | 0.356 |
| RTN41       | 4.86E-78 | 0.594537807 | 0.72  | 0.495 |
| RHBDF22     | 9.23E-78 | 0.278637627 | 0.432 | 0.202 |
| CHID1       | 1.03E-77 | 0.265512153 | 0.274 | 0.107 |
| FNDC3B2     | 1.62E-77 | 0.612116995 | 0.623 | 0.396 |
| AFDN        | 2.81E-77 | 0.266424649 | 0.295 | 0.118 |
| SNX31       | 2.91E-77 | 0.519500785 | 0.707 | 0.453 |
| MAFF1       | 5.62E-77 | 0.291267163 | 0.372 | 0.164 |
| LAPTM4A1    | 7.85E-77 | 0.475430876 | 0.598 | 0.339 |
| TBC1D141    | 1.32E-76 | 0.342611515 | 0.398 | 0.185 |
| TSC22D12    | 1.61E-76 | 0.463524701 | 0.39  | 0.18  |
| GADD45B2    | 4.60E-76 | 0.646684572 | 0.686 | 0.454 |
| STX61       | 9.94E-76 | 0.367479847 | 0.345 | 0.15  |
| NUBP11      | 1.48E-75 | 0.318753952 | 0.352 | 0.154 |
| RNASEK1     | 3.87E-75 | 0.612880533 | 0.818 | 0.648 |
| AF117829.11 | 1.77E-74 | 0.30906961  | 0.312 | 0.13  |
| HIF1A2      | 1.89E-74 | 0.608071182 | 0.778 | 0.544 |

|           |          |             |       |       |
|-----------|----------|-------------|-------|-------|
| SLC44A12  | 4.10E-74 | 0.326258824 | 0.326 | 0.141 |
| CPEB42    | 4.42E-74 | 0.533372037 | 0.539 | 0.297 |
| ADAM171   | 4.64E-74 | 0.501588512 | 0.524 | 0.283 |
| GNB21     | 5.73E-74 | 0.386893492 | 0.518 | 0.269 |
| RFX21     | 6.16E-74 | 0.499643824 | 0.328 | 0.143 |
| PHACTR41  | 7.69E-74 | 0.679767994 | 0.514 | 0.28  |
| ATP13A32  | 3.33E-73 | 0.432679779 | 0.569 | 0.317 |
| BNIP3L1   | 7.56E-73 | 0.467506148 | 0.534 | 0.295 |
| BAZ2B1    | 7.58E-73 | 0.357533563 | 0.524 | 0.28  |
| SLC25A191 | 7.71E-72 | 0.276226052 | 0.299 | 0.124 |
| VPS351    | 1.28E-71 | 0.343211759 | 0.453 | 0.224 |
| PABPC41   | 1.55E-71 | 0.416761948 | 0.571 | 0.316 |
| DENND1A1  | 2.22E-71 | 0.380675499 | 0.588 | 0.328 |
| UBE2D11   | 2.33E-71 | 0.334164223 | 0.481 | 0.244 |
| RAB5C1    | 2.43E-71 | 0.47196047  | 0.602 | 0.351 |
| PAPSS12   | 3.29E-71 | 0.292680572 | 0.382 | 0.178 |
| TMSB101   | 4.77E-71 | 0.661679179 | 0.983 | 0.932 |
| ARSB1     | 6.43E-71 | 0.290120311 | 0.33  | 0.144 |
| ITM2B2    | 6.94E-71 | 0.965371325 | 0.834 | 0.779 |
| RRBP12    | 7.96E-71 | 0.283940658 | 0.486 | 0.25  |
| ATP6V1A   | 9.55E-71 | 0.343495924 | 0.473 | 0.238 |
| NENF      | 1.04E-70 | 0.344774666 | 0.425 | 0.206 |
| EEA11     | 3.55E-70 | 0.268502765 | 0.459 | 0.223 |
| SMIM141   | 1.35E-69 | 0.344061572 | 0.404 | 0.193 |
| YWHAG1    | 4.98E-69 | 0.334529706 | 0.514 | 0.268 |
| ZFP36L12  | 2.63E-68 | 0.57618108  | 0.732 | 0.493 |
| CLTA1     | 4.10E-68 | 0.547055769 | 0.671 | 0.455 |
| NPTN2     | 1.30E-67 | 0.303367566 | 0.476 | 0.24  |
| C4orf48   | 1.48E-67 | 0.308683745 | 0.463 | 0.233 |
| TMEM147   | 2.57E-67 | 0.329089513 | 0.405 | 0.196 |
| IFNAR1    | 3.15E-67 | 0.327553084 | 0.426 | 0.212 |
| ABHD51    | 4.66E-67 | 0.304490728 | 0.405 | 0.201 |
| RPN1      | 1.04E-66 | 0.349242546 | 0.431 | 0.216 |
| UBTD21    | 1.15E-66 | 0.293753326 | 0.292 | 0.124 |
| PRNP1     | 1.45E-66 | 0.440583419 | 0.524 | 0.288 |
| GCLC      | 4.10E-66 | 0.281946908 | 0.313 | 0.136 |
| TRAPPC51  | 5.90E-66 | 0.428549255 | 0.586 | 0.347 |
| GNA132    | 6.06E-66 | 0.512054664 | 0.696 | 0.443 |
| IER5L2    | 9.44E-66 | 0.321766925 | 0.416 | 0.207 |
| ATP2A21   | 1.55E-65 | 0.549731415 | 0.558 | 0.323 |
| SERF21    | 1.87E-65 | 0.619390916 | 0.927 | 0.857 |
| CMTM62    | 2.09E-65 | 0.459628577 | 0.709 | 0.434 |
| LCP21     | 4.31E-65 | 0.252688753 | 0.542 | 0.316 |

|             |          |             |       |       |
|-------------|----------|-------------|-------|-------|
| SIL11       | 4.60E-65 | 0.283974826 | 0.409 | 0.202 |
| SNX21       | 5.53E-65 | 0.317188565 | 0.68  | 0.406 |
| ATP2C11     | 6.35E-65 | 0.570647065 | 0.539 | 0.31  |
| TPI11       | 7.05E-65 | 0.609780548 | 0.716 | 0.512 |
| PDE8A2      | 2.46E-64 | 0.38580982  | 0.521 | 0.285 |
| ABI31       | 3.08E-64 | 0.285679354 | 0.355 | 0.165 |
| CALR1       | 4.85E-64 | 0.632956157 | 0.754 | 0.574 |
| TMEM30A     | 9.81E-64 | 0.267493742 | 0.376 | 0.176 |
| DBI1        | 1.17E-63 | 0.651072669 | 0.717 | 0.519 |
| ODF3B1      | 2.48E-63 | 0.260077555 | 0.26  | 0.108 |
| TMEM14C     | 3.38E-63 | 0.383192362 | 0.437 | 0.225 |
| CD841       | 6.16E-63 | 0.387144558 | 0.434 | 0.225 |
| NRIP12      | 1.04E-62 | 0.324880069 | 0.504 | 0.266 |
| CAPNS11     | 1.89E-62 | 0.310380642 | 0.456 | 0.236 |
| PHLDA21     | 2.27E-62 | 0.404657596 | 0.255 | 0.107 |
| PRCP2       | 2.38E-62 | 0.291736946 | 0.392 | 0.193 |
| TKT1        | 4.25E-62 | 0.343937408 | 0.549 | 0.311 |
| VPS8        | 7.53E-62 | 0.30862106  | 0.436 | 0.224 |
| MIR181A1HG1 | 1.25E-61 | 0.296949862 | 0.369 | 0.177 |
| GNG72       | 2.07E-61 | 0.417396482 | 0.524 | 0.29  |
| ARHGAP241   | 6.40E-61 | 0.6321921   | 0.406 | 0.211 |
| SUMO3       | 6.72E-61 | 0.281631919 | 0.464 | 0.241 |
| PLEKHB21    | 1.31E-60 | 0.34762645  | 0.554 | 0.311 |
| FAM210A1    | 2.10E-60 | 0.378696039 | 0.401 | 0.203 |
| SLC25A331   | 3.99E-60 | 0.363238654 | 0.423 | 0.22  |
| TSPO1       | 4.22E-60 | 0.698196041 | 0.625 | 0.446 |
| ARPC32      | 1.23E-59 | 0.479669632 | 0.883 | 0.77  |
| ECHS1       | 1.74E-59 | 0.339216773 | 0.4   | 0.201 |
| ARL8B1      | 2.86E-59 | 0.37898865  | 0.649 | 0.403 |
| CAP11       | 6.12E-59 | 0.514393261 | 0.674 | 0.456 |
| DBNL1       | 1.75E-58 | 0.295102989 | 0.504 | 0.27  |
| SIPA1L12    | 2.54E-58 | 0.387625957 | 0.854 | 0.675 |
| RALA1       | 4.84E-58 | 0.525191331 | 0.592 | 0.374 |
| MTSS12      | 1.23E-57 | 0.333823953 | 0.441 | 0.23  |
| RTN3        | 2.80E-57 | 0.304842206 | 0.539 | 0.309 |
| SGK31       | 1.05E-56 | 0.291581331 | 0.438 | 0.227 |
| TNFRSF10B1  | 1.12E-56 | 0.3738074   | 0.35  | 0.173 |
| NFATC12     | 2.62E-56 | 0.530624225 | 0.467 | 0.259 |
| TXN1        | 5.32E-56 | 0.67141012  | 0.676 | 0.48  |
| ADCY31      | 7.75E-56 | 0.278548412 | 0.288 | 0.13  |
| ITPR23      | 1.33E-55 | 0.491000694 | 0.72  | 0.501 |
| CHD91       | 2.83E-55 | 0.305040052 | 0.545 | 0.31  |
| AP2M1       | 8.34E-55 | 0.335170488 | 0.521 | 0.299 |

|          |          |             |       |       |
|----------|----------|-------------|-------|-------|
| CLTC1    | 9.87E-55 | 0.37421197  | 0.527 | 0.309 |
| GRB22    | 1.85E-54 | 0.396258911 | 0.784 | 0.595 |
| VPS29    | 2.12E-54 | 0.371439779 | 0.564 | 0.337 |
| GBP11    | 1.27E-53 | 0.365464782 | 0.353 | 0.174 |
| RHOG1    | 2.04E-53 | 0.30944334  | 0.566 | 0.328 |
| CTDNEP1  | 2.48E-53 | 0.256647496 | 0.419 | 0.219 |
| MYO9B1   | 2.69E-53 | 0.324004091 | 0.622 | 0.389 |
| KDELR11  | 7.54E-53 | 0.374129474 | 0.476 | 0.273 |
| CCDC501  | 1.04E-52 | 0.343426605 | 0.452 | 0.246 |
| ZEB22    | 1.48E-52 | 0.254026119 | 0.71  | 0.455 |
| SAP301   | 1.60E-52 | 0.262773636 | 0.33  | 0.162 |
| RHOA1    | 2.96E-52 | 0.48448251  | 0.84  | 0.687 |
| MAP3K131 | 3.12E-52 | 0.259926788 | 0.345 | 0.171 |
| HIP11    | 3.49E-52 | 0.401539195 | 0.335 | 0.169 |
| ATP6V1E1 | 9.47E-52 | 0.297840298 | 0.474 | 0.261 |
| RBPJ3    | 1.38E-51 | 1.466182862 | 0.675 | 0.496 |
| H2AFJ    | 4.89E-51 | 0.334865736 | 0.418 | 0.226 |
| C6orf62  | 1.10E-50 | 0.274894376 | 0.521 | 0.296 |
| ARPC1B2  | 1.95E-50 | 0.54801491  | 0.801 | 0.627 |
| OAZ1     | 3.05E-50 | 0.385185192 | 0.926 | 0.862 |
| COTL11   | 1.30E-48 | 0.466670706 | 0.774 | 0.548 |
| FCHSD22  | 2.13E-48 | 0.261630675 | 0.663 | 0.419 |
| MLEC     | 2.62E-48 | 0.279817346 | 0.386 | 0.207 |
| GDI22    | 4.59E-48 | 0.369856021 | 0.666 | 0.422 |
| TCOF11   | 6.84E-48 | 0.33873258  | 0.35  | 0.181 |
| NCKAP1L  | 6.91E-48 | 0.294472064 | 0.508 | 0.292 |
| NEAT11   | 1.15E-47 | 0.623158442 | 0.856 | 0.827 |
| BHLHE402 | 1.36E-47 | 0.28942981  | 0.448 | 0.249 |
| EMP31    | 1.92E-47 | 0.483522218 | 0.677 | 0.485 |
| MYDGF1   | 5.79E-47 | 0.433659537 | 0.476 | 0.291 |
| TMBIM6   | 8.01E-47 | 0.478033642 | 0.812 | 0.674 |
| SPATS21  | 1.27E-46 | 0.316370295 | 0.305 | 0.15  |
| ANKH3    | 1.59E-46 | 0.585370284 | 0.467 | 0.273 |
| NAPA1    | 1.60E-46 | 0.399090338 | 0.563 | 0.347 |
| POLG21   | 2.25E-46 | 0.299989765 | 0.31  | 0.158 |
| OS9      | 4.92E-46 | 0.250971456 | 0.496 | 0.291 |
| TIMM8B   | 4.93E-46 | 0.27828991  | 0.399 | 0.217 |
| RB11     | 6.40E-46 | 0.309012487 | 0.707 | 0.462 |
| RNF181   | 1.48E-45 | 0.286458938 | 0.474 | 0.275 |
| PGLS1    | 1.73E-45 | 0.302841586 | 0.486 | 0.276 |
| CAPZB1   | 9.67E-45 | 0.408983503 | 0.739 | 0.579 |
| SNAPC11  | 1.03E-44 | 0.398214958 | 0.348 | 0.185 |
| NR4A32   | 1.29E-44 | 0.552063902 | 0.579 | 0.365 |

|             |          |             |       |       |
|-------------|----------|-------------|-------|-------|
| PIKFYVE1    | 1.56E-44 | 0.424529523 | 0.447 | 0.256 |
| ATF62       | 2.02E-44 | 0.495145103 | 0.637 | 0.424 |
| LMNA3       | 2.13E-44 | 0.385215184 | 0.662 | 0.439 |
| WASHC2A     | 2.99E-44 | 0.25013321  | 0.374 | 0.2   |
| AC020916.12 | 9.93E-44 | 0.354277926 | 0.512 | 0.312 |
| SH3BGRL1    | 1.10E-43 | 0.408478989 | 0.746 | 0.54  |
| ZNF433-AS1  | 1.73E-43 | 0.251692686 | 0.33  | 0.174 |
| ATP6V0E1    | 1.77E-43 | 0.480437133 | 0.802 | 0.666 |
| RHEB1       | 1.91E-43 | 0.350989772 | 0.627 | 0.41  |
| CCSER11     | 1.93E-43 | 0.511137652 | 0.321 | 0.17  |
| KDM6B2      | 2.00E-43 | 0.31488304  | 0.522 | 0.313 |
| ATP5PD      | 2.53E-43 | 0.392864364 | 0.624 | 0.41  |
| RGS103      | 2.95E-43 | 0.471725954 | 0.612 | 0.406 |
| POMP1       | 1.05E-42 | 0.419789761 | 0.725 | 0.549 |
| TMEM219     | 1.28E-42 | 0.298113741 | 0.502 | 0.302 |
| TSC22D22    | 2.37E-42 | 0.44444392  | 0.572 | 0.36  |
| MAP3K82     | 3.43E-42 | 0.294166398 | 0.647 | 0.418 |
| NECAP2      | 4.44E-42 | 0.257915389 | 0.391 | 0.211 |
| RGS22       | 4.74E-42 | 0.411411425 | 0.724 | 0.543 |
| FKBP1A1     | 6.18E-42 | 0.382629436 | 0.569 | 0.368 |
| S100A61     | 7.95E-42 | 0.731509005 | 0.732 | 0.634 |
| CKS2        | 1.52E-41 | 0.29255977  | 0.397 | 0.226 |
| MOB1A1      | 1.92E-41 | 0.314494801 | 0.699 | 0.473 |
| CHMP1B1     | 3.09E-41 | 0.3777117   | 0.55  | 0.351 |
| ENO12       | 4.51E-41 | 0.454205548 | 0.726 | 0.555 |
| PSMA4       | 4.81E-41 | 0.325086584 | 0.506 | 0.307 |
| SLC20A1     | 6.42E-41 | 0.469812918 | 0.479 | 0.291 |
| IFI27       | 3.76E-40 | 0.917920045 | 0.288 | 0.156 |
| ASAP11      | 9.66E-40 | 0.288781294 | 0.665 | 0.454 |
| SPAG91      | 2.12E-39 | 0.36148241  | 0.675 | 0.484 |
| DPP7        | 2.48E-39 | 0.303815119 | 0.564 | 0.361 |
| NDUFB2      | 4.14E-39 | 0.385630192 | 0.657 | 0.476 |
| PLIN23      | 6.98E-39 | 0.343030596 | 0.57  | 0.372 |
| AHR3        | 1.40E-38 | 0.303468711 | 0.593 | 0.384 |
| GBE11       | 1.79E-38 | 0.268380476 | 0.361 | 0.202 |
| ERO1A       | 2.18E-38 | 0.281909439 | 0.356 | 0.197 |
| TPM31       | 1.68E-37 | 0.380746596 | 0.825 | 0.662 |
| GNG51       | 1.77E-37 | 0.410830189 | 0.66  | 0.48  |
| GPR1831     | 2.75E-37 | 0.36003962  | 0.735 | 0.532 |
| RILPL22     | 3.45E-37 | 0.279652553 | 0.66  | 0.438 |
| ZSWIM62     | 3.94E-37 | 0.386250875 | 0.798 | 0.631 |
| SSR31       | 4.00E-37 | 0.303765254 | 0.559 | 0.355 |
| BST21       | 7.28E-37 | 0.455278602 | 0.589 | 0.422 |



|             |          |             |       |       |
|-------------|----------|-------------|-------|-------|
| HOMER12     | 8.63E-37 | 0.368333637 | 0.343 | 0.194 |
| INSIG11     | 2.06E-36 | 0.351964368 | 0.418 | 0.251 |
| ETV61       | 3.75E-36 | 0.275426907 | 0.723 | 0.515 |
| SERPINB11   | 9.72E-36 | 0.267118409 | 0.595 | 0.393 |
| UST2        | 1.98E-35 | 0.355028621 | 0.471 | 0.292 |
| RAPGEF13    | 2.58E-35 | 0.314874852 | 0.784 | 0.602 |
| TXN2        | 5.92E-35 | 0.26167204  | 0.378 | 0.213 |
| VDAC1       | 6.23E-35 | 0.300249284 | 0.565 | 0.369 |
| MYL61       | 9.28E-35 | 0.42094954  | 0.89  | 0.83  |
| DUSP1       | 9.46E-35 | 0.458206426 | 0.843 | 0.724 |
| MICOS10     | 1.02E-34 | 0.297127864 | 0.608 | 0.416 |
| CPEB21      | 1.22E-34 | 0.31652161  | 0.318 | 0.176 |
| PCBP11      | 1.51E-34 | 0.362136693 | 0.675 | 0.465 |
| SCP2        | 1.11E-33 | 0.305607534 | 0.497 | 0.301 |
| PDIA61      | 2.02E-33 | 0.355734852 | 0.554 | 0.373 |
| KCNQ10T11   | 1.99E-32 | 0.448265528 | 0.328 | 0.191 |
| NFKB11      | 2.43E-32 | 0.310349082 | 0.76  | 0.596 |
| MYO5A1      | 3.31E-32 | 0.252132836 | 0.573 | 0.384 |
| PFN12       | 3.35E-32 | 0.401198815 | 0.883 | 0.769 |
| TAOK31      | 9.73E-32 | 0.461162236 | 0.713 | 0.558 |
| ATP5F1C     | 1.43E-31 | 0.289381723 | 0.582 | 0.39  |
| ANKRD33B1   | 1.75E-31 | 0.333310903 | 0.257 | 0.141 |
| PDIA31      | 1.33E-30 | 0.384119646 | 0.685 | 0.534 |
| ZFAND2A1    | 3.04E-30 | 0.328828065 | 0.425 | 0.275 |
| MGMT1       | 8.77E-30 | 0.270159517 | 0.498 | 0.321 |
| EIF4A32     | 1.49E-29 | 0.432931816 | 0.66  | 0.501 |
| CLIC12      | 1.27E-28 | 0.378470053 | 0.791 | 0.668 |
| ZNF706      | 3.13E-28 | 0.314434727 | 0.613 | 0.426 |
| AFF42       | 3.66E-28 | 0.37611738  | 0.722 | 0.557 |
| BZW2        | 4.98E-28 | 0.257887517 | 0.423 | 0.268 |
| TACC11      | 7.67E-28 | 0.271581454 | 0.607 | 0.417 |
| ATP1B32     | 1.55E-27 | 0.283766819 | 0.798 | 0.651 |
| HIF1A-AS32  | 2.85E-27 | 0.289074664 | 0.315 | 0.186 |
| SQSTM11     | 5.93E-27 | 0.334162209 | 0.806 | 0.686 |
| PSMB31      | 8.62E-27 | 0.3604642   | 0.614 | 0.446 |
| BLOC1S12    | 8.99E-27 | 0.279461891 | 0.562 | 0.394 |
| ACTR31      | 3.31E-26 | 0.251370605 | 0.768 | 0.591 |
| AC120193.11 | 8.35E-26 | 0.321780862 | 0.313 | 0.192 |
| CD1641      | 9.51E-26 | 0.275773303 | 0.687 | 0.509 |
| TMED10      | 1.69E-25 | 0.262698715 | 0.557 | 0.381 |
| PPIB        | 4.11E-25 | 0.427596489 | 0.69  | 0.567 |
| NFKBIZ1     | 1.03E-24 | 0.3022366   | 0.624 | 0.463 |
| UQCR10      | 1.71E-24 | 0.348291258 | 0.63  | 0.479 |

|           |          |             |       |       |
|-----------|----------|-------------|-------|-------|
| CFL11     | 3.65E-24 | 0.323163132 | 0.902 | 0.825 |
| SLC25A5   | 5.50E-24 | 0.312594224 | 0.652 | 0.479 |
| NOP10     | 1.90E-23 | 0.265560646 | 0.554 | 0.395 |
| DPYD1     | 2.06E-23 | 0.392357693 | 0.623 | 0.505 |
| ACTR21    | 2.24E-23 | 0.252789124 | 0.787 | 0.633 |
| SLAMF72   | 4.58E-23 | 0.286353129 | 0.26  | 0.155 |
| COX5B     | 8.18E-23 | 0.327937894 | 0.718 | 0.574 |
| PSMB6     | 1.44E-22 | 0.277933714 | 0.519 | 0.37  |
| MFSD4B2   | 2.33E-22 | 0.364359731 | 0.376 | 0.245 |
| PSME21    | 2.55E-22 | 0.4607123   | 0.598 | 0.465 |
| ATP5PB    | 2.63E-22 | 0.253626667 | 0.524 | 0.353 |
| GAPDH2    | 3.17E-21 | 0.380231274 | 0.902 | 0.839 |
| LRPAP1    | 6.04E-21 | 0.276517791 | 0.517 | 0.37  |
| ATP5MF    | 2.55E-20 | 0.254562331 | 0.588 | 0.441 |
| PRELID11  | 7.94E-20 | 0.275304305 | 0.562 | 0.408 |
| ATP5MC3   | 3.27E-19 | 0.264893154 | 0.634 | 0.482 |
| IFI62     | 4.10E-19 | 0.421344002 | 0.445 | 0.323 |
| MACF12    | 6.55E-19 | 0.256727023 | 0.675 | 0.532 |
| BANK11    | 7.13E-19 | 0.454175767 | 0.314 | 0.213 |
| COX6B1    | 3.36E-18 | 0.285931199 | 0.736 | 0.612 |
| SARNP1    | 1.15E-17 | 0.457257727 | 0.541 | 0.385 |
| CCDC1381  | 1.57E-17 | 0.370560061 | 0.338 | 0.23  |
| ARPC22    | 2.21E-17 | 0.250562863 | 0.866 | 0.78  |
| VAMP51    | 2.76E-17 | 0.391067306 | 0.381 | 0.267 |
| ATP5F1E   | 5.34E-17 | 0.308827175 | 0.915 | 0.85  |
| SLC2A31   | 1.79E-14 | 0.284315649 | 0.611 | 0.468 |
| NUFIP21   | 2.02E-14 | 0.317555713 | 0.698 | 0.564 |
| WTAP1     | 1.30E-12 | 0.261117135 | 0.726 | 0.593 |
| ATF7IP21  | 1.12E-07 | 0.276578042 | 0.398 | 0.311 |
| ERO1B     | 2.77E-05 | 0.283486378 | 0.399 | 0.322 |
| HLA-DQA13 | 0        | 2.199278356 | 0.973 | 0.403 |
| HLA-DQB13 | 0        | 2.18154087  | 0.971 | 0.416 |
| HLA-DPA13 | 0        | 2.155838363 | 0.979 | 0.569 |
| HLA-DRB13 | 0        | 2.155750441 | 0.989 | 0.566 |
| HLA-DRA3  | 0        | 2.11777632  | 0.995 | 0.531 |
| HLA-DPB13 | 0        | 2.079261108 | 0.981 | 0.59  |
| CD862     | 0        | 2.000550033 | 0.634 | 0.141 |
| CD743     | 0        | 1.96934117  | 0.995 | 0.716 |
| CALCRL    | 0        | 1.47461875  | 0.332 | 0.03  |
| CSF2RA2   | 0        | 1.39281737  | 0.482 | 0.09  |
| P2RY6     | 0        | 1.310047187 | 0.279 | 0.034 |
| ALDH22    | 0        | 1.253867519 | 0.482 | 0.097 |
| PKIB1     | 0        | 1.245068925 | 0.314 | 0.039 |

|           |           |             |       |       |
|-----------|-----------|-------------|-------|-------|
| PPP1R14A  | 0         | 1.151530565 | 0.294 | 0.017 |
| HLA-DMB3  | 0         | 1.151198927 | 0.762 | 0.23  |
| CIITA3    | 0         | 1.062391652 | 0.601 | 0.147 |
| SERPINF11 | 0         | 1.0381427   | 0.354 | 0.051 |
| GPR1571   | 0         | 1.011075604 | 0.339 | 0.046 |
| CLECL1    | 0         | 1.002012364 | 0.466 | 0.091 |
| SPIB1     | 0         | 0.942066599 | 0.443 | 0.073 |
| CD1C      | 0         | 0.939057189 | 0.291 | 0.032 |
| PLD4      | 0         | 0.808528161 | 0.323 | 0.039 |
| SEMA7A    | 0         | 0.654633477 | 0.407 | 0.056 |
| FLT3      | 0         | 0.629893986 | 0.274 | 0.033 |
| CD833     | 2.60E-295 | 1.476449483 | 0.942 | 0.428 |
| FAM49A3   | 9.99E-291 | 1.121857137 | 0.812 | 0.267 |
| GRASP3    | 8.65E-289 | 1.287112522 | 0.719 | 0.229 |
| IRF83     | 7.90E-288 | 1.204341694 | 0.727 | 0.224 |
| HLA-DQA23 | 5.89E-285 | 1.80148488  | 0.743 | 0.273 |
| ZBTB461   | 1.38E-283 | 0.692694692 | 0.354 | 0.059 |
| SYNGR23   | 7.51E-282 | 1.095844384 | 0.754 | 0.261 |
| CLIC22    | 2.58E-281 | 0.913007066 | 0.317 | 0.05  |
| IFI302    | 9.51E-280 | 1.560746474 | 0.715 | 0.227 |
| CTSH2     | 3.10E-276 | 1.346797753 | 0.688 | 0.222 |
| HLA-DMA3  | 1.55E-273 | 1.210454759 | 0.862 | 0.354 |
| SPINT22   | 2.22E-262 | 0.874172878 | 0.551 | 0.146 |
| HDAC92    | 8.56E-260 | 1.240769672 | 0.642 | 0.189 |
| DDAH22    | 8.82E-259 | 0.720884161 | 0.514 | 0.126 |
| MEF2C3    | 1.89E-257 | 1.138195984 | 0.784 | 0.268 |
| KYNU2     | 8.09E-257 | 0.544873595 | 0.662 | 0.179 |
| THEMIS24  | 5.66E-251 | 0.927059122 | 0.605 | 0.179 |
| CD403     | 2.06E-245 | 0.881722752 | 0.514 | 0.132 |
| MCOLN22   | 9.58E-243 | 1.065208761 | 0.623 | 0.189 |
| CTSZ2     | 5.44E-241 | 0.95276535  | 0.8   | 0.325 |
| SPI12     | 1.70E-240 | 0.905852213 | 0.504 | 0.128 |
| IL4I12    | 1.20E-236 | 1.196469508 | 0.433 | 0.101 |
| UBE2E23   | 1.24E-232 | 0.934905725 | 0.739 | 0.246 |
| FAM160A1  | 1.05E-231 | 1.325684617 | 0.253 | 0.038 |
| WDFY42    | 2.35E-228 | 0.963215407 | 0.587 | 0.172 |
| U62317.41 | 4.67E-222 | 0.5065243   | 0.302 | 0.055 |
| GSN2      | 7.77E-222 | 1.369125441 | 0.54  | 0.16  |
| DAPK12    | 3.73E-220 | 1.006521111 | 0.396 | 0.088 |
| GRN2      | 5.27E-217 | 0.80526378  | 0.626 | 0.2   |
| SNX83     | 7.01E-217 | 0.935798964 | 0.637 | 0.207 |
| SULF21    | 1.58E-216 | 1.050899769 | 0.441 | 0.113 |
| OPN32     | 2.35E-215 | 0.804748618 | 0.341 | 0.07  |

|          |           |             |       |       |
|----------|-----------|-------------|-------|-------|
| MNDA2    | 4.43E-214 | 0.705032821 | 0.409 | 0.095 |
| SH2B33   | 2.43E-210 | 0.90794056  | 0.647 | 0.216 |
| PRKAR2B  | 1.32E-209 | 0.53241626  | 0.278 | 0.048 |
| RASSF23  | 2.94E-209 | 0.673316775 | 0.581 | 0.176 |
| SMIM142  | 4.25E-209 | 0.875493691 | 0.605 | 0.191 |
| BCL2A12  | 5.49E-206 | 0.953075981 | 0.682 | 0.237 |
| LY863    | 1.14E-203 | 0.745994009 | 0.514 | 0.146 |
| CLCN5    | 1.59E-202 | 0.50864659  | 0.265 | 0.046 |
| LGALS21  | 4.75E-202 | 1.178102094 | 0.281 | 0.052 |
| CYBB3    | 5.41E-202 | 0.732663347 | 0.596 | 0.183 |
| PAK13    | 2.06E-200 | 0.842228172 | 0.564 | 0.178 |
| BASP12   | 1.41E-197 | 0.736798242 | 0.739 | 0.284 |
| CCSER12  | 6.47E-196 | 1.061155069 | 0.55  | 0.166 |
| LYN3     | 1.04E-192 | 0.621644584 | 0.901 | 0.359 |
| PEA152   | 9.57E-192 | 0.714989933 | 0.444 | 0.121 |
| TSPAN332 | 2.18E-191 | 0.575690109 | 0.411 | 0.104 |
| C12orf45 | 1.04E-190 | 1.023080607 | 0.466 | 0.132 |
| CD802    | 9.06E-190 | 0.975530712 | 0.405 | 0.105 |
| TYROBP2  | 1.74E-189 | 1.162694595 | 0.563 | 0.178 |
| CSF2RB1  | 4.12E-187 | 0.448735191 | 0.28  | 0.054 |
| SWAP702  | 2.73E-186 | 0.958429275 | 0.651 | 0.233 |
| CST32    | 5.03E-184 | 2.385111457 | 0.534 | 0.182 |
| GRK33    | 3.06E-181 | 0.866995857 | 0.556 | 0.182 |
| ETV31    | 3.72E-180 | 1.111496188 | 0.517 | 0.172 |
| PLEK2    | 5.00E-180 | 0.731653348 | 0.564 | 0.184 |
| CCDC88A3 | 6.58E-179 | 0.809826533 | 0.526 | 0.169 |
| PHACTR13 | 2.09E-177 | 0.772442591 | 0.579 | 0.192 |
| GNG73    | 1.85E-176 | 0.754892723 | 0.757 | 0.287 |
| TCF42    | 9.81E-176 | 0.855311942 | 0.689 | 0.26  |
| DPYSL22  | 1.23E-175 | 0.63457875  | 0.461 | 0.134 |
| SLC15A4  | 1.93E-175 | 1.133053607 | 0.489 | 0.154 |
| RAB312   | 5.50E-175 | 0.494679154 | 0.547 | 0.163 |
| CDK2AP12 | 6.83E-174 | 0.467078703 | 0.37  | 0.092 |
| LST12    | 1.99E-172 | 1.266781812 | 0.448 | 0.134 |
| RHEX2    | 9.24E-172 | 1.053979732 | 0.337 | 0.082 |
| GPR1832  | 3.60E-170 | 1.689672806 | 0.877 | 0.531 |
| HLA-DOB1 | 1.94E-169 | 0.470690222 | 0.314 | 0.069 |
| NFKBID3  | 1.08E-168 | 0.788099985 | 0.617 | 0.217 |
| AP1S31   | 2.17E-167 | 0.645279034 | 0.426 | 0.118 |
| RBM472   | 3.15E-166 | 0.280366371 | 0.568 | 0.179 |
| SRC1     | 3.18E-166 | 0.403318534 | 0.279 | 0.058 |
| NR4A33   | 3.41E-166 | 1.281668015 | 0.757 | 0.363 |
| HCK2     | 4.02E-165 | 0.310624351 | 0.381 | 0.097 |

|           |           |             |       |       |
|-----------|-----------|-------------|-------|-------|
| HLA-DOA2  | 4.67E-164 | 0.382151995 | 0.348 | 0.083 |
| P2RY14    | 1.12E-163 | 0.519128747 | 0.292 | 0.062 |
| ALCAM2    | 4.83E-163 | 1.133963663 | 0.664 | 0.271 |
| BID1      | 1.51E-162 | 1.155731919 | 0.551 | 0.209 |
| RNASE63   | 3.66E-162 | 0.669470106 | 0.427 | 0.125 |
| SLC41A21  | 7.42E-162 | 0.950177453 | 0.424 | 0.126 |
| NECTIN22  | 1.64E-161 | 0.528510273 | 0.297 | 0.067 |
| ATF52     | 2.70E-161 | 1.001348194 | 0.404 | 0.116 |
| IL182     | 3.17E-156 | 0.588906409 | 0.318 | 0.076 |
| CMTM63    | 3.45E-155 | 0.823896742 | 0.838 | 0.434 |
| DAPP11    | 1.02E-154 | 1.063920858 | 0.646 | 0.281 |
| TTYH21    | 2.78E-153 | 0.526140921 | 0.272 | 0.059 |
| SYK3      | 9.77E-153 | 0.603563877 | 0.535 | 0.183 |
| LGALS92   | 1.67E-152 | 0.569044824 | 0.53  | 0.179 |
| LRRK12    | 2.85E-152 | 0.574755423 | 0.365 | 0.098 |
| FCHSD23   | 6.90E-152 | 1.488777961 | 0.807 | 0.419 |
| CXCL162   | 2.05E-151 | 0.674002422 | 0.346 | 0.091 |
| CCDC503   | 4.58E-151 | 0.820673409 | 0.613 | 0.244 |
| NRARP     | 2.92E-150 | 0.588247555 | 0.366 | 0.099 |
| TBC1D94   | 3.35E-150 | 0.678332949 | 0.427 | 0.13  |
| KLF42     | 4.54E-148 | 0.616376035 | 0.387 | 0.109 |
| GAPT      | 3.47E-147 | 0.530180726 | 0.278 | 0.063 |
| TUBB63    | 8.04E-147 | 0.655457587 | 0.467 | 0.149 |
| AIF12     | 1.36E-146 | 1.115163747 | 0.45  | 0.142 |
| TSPAN131  | 4.59E-145 | 0.901239032 | 0.342 | 0.094 |
| WARS2     | 1.55E-144 | 0.630267741 | 0.416 | 0.127 |
| BCL11A1   | 3.59E-144 | 0.471046941 | 0.515 | 0.167 |
| CAPG3     | 2.22E-143 | 0.772943219 | 0.613 | 0.239 |
| FGD22     | 2.82E-141 | 0.472038549 | 0.367 | 0.103 |
| CHAF1A    | 8.52E-141 | 0.490087985 | 0.296 | 0.072 |
| IL13RA13  | 1.04E-140 | 0.56845949  | 0.419 | 0.128 |
| HVCN11    | 1.17E-140 | 0.532653003 | 0.422 | 0.128 |
| AFF31     | 6.12E-140 | 0.425130387 | 0.687 | 0.257 |
| AXL2      | 1.36E-139 | 0.604520385 | 0.273 | 0.063 |
| ARHGAP312 | 6.33E-139 | 0.65659641  | 0.448 | 0.146 |
| EMILIN22  | 3.41E-137 | 0.608794417 | 0.482 | 0.158 |
| SHTN12    | 6.56E-137 | 0.411149875 | 0.262 | 0.06  |
| 12-Mar    | 1.09E-136 | 0.534160395 | 0.557 | 0.2   |
| NME23     | 1.77E-136 | 0.817333088 | 0.9   | 0.612 |
| RAB322    | 1.11E-135 | 0.540027088 | 0.262 | 0.062 |
| CORO1C2   | 4.51E-135 | 0.724951074 | 0.457 | 0.156 |
| SPECC11   | 3.62E-134 | 0.512453229 | 0.268 | 0.063 |
| SMCO42    | 1.29E-133 | 0.40367551  | 0.357 | 0.101 |

|            |           |             |       |       |
|------------|-----------|-------------|-------|-------|
| LILRB42    | 3.93E-133 | 0.713724412 | 0.266 | 0.065 |
| CDKN1A3    | 1.21E-132 | 0.831615241 | 0.593 | 0.252 |
| SLC8A12    | 1.98E-132 | 1.139801385 | 0.376 | 0.113 |
| NME4       | 1.67E-131 | 0.292838986 | 0.294 | 0.074 |
| PLAC81     | 7.17E-131 | 1.156574937 | 0.501 | 0.194 |
| ENPP22     | 3.04E-130 | 0.479692181 | 0.252 | 0.058 |
| REL2       | 3.29E-128 | 0.946931598 | 0.939 | 0.661 |
| GNA152     | 5.37E-128 | 0.808503557 | 0.463 | 0.167 |
| RAB11FIP12 | 1.88E-127 | 0.987208981 | 0.825 | 0.49  |
| SPRED21    | 3.44E-127 | 0.732651317 | 0.402 | 0.128 |
| IGSF62     | 5.41E-127 | 0.671963541 | 0.33  | 0.092 |
| PLEKHO14   | 1.33E-126 | 0.610227527 | 0.603 | 0.246 |
| PTK21      | 9.03E-126 | 0.505501463 | 0.423 | 0.134 |
| ARID3A1    | 9.93E-126 | 0.597922997 | 0.314 | 0.088 |
| PARVB3     | 7.46E-125 | 0.666611257 | 0.588 | 0.242 |
| ANKRD33B2  | 1.79E-124 | 1.032638471 | 0.408 | 0.139 |
| RIPK22     | 2.95E-124 | 0.636202509 | 0.508 | 0.19  |
| ETV62      | 3.93E-124 | 0.937486537 | 0.846 | 0.515 |
| NPC23      | 1.80E-122 | 0.628140204 | 0.695 | 0.318 |
| CALHM63    | 3.11E-122 | 0.600612729 | 0.384 | 0.121 |
| MCTP12     | 5.60E-122 | 0.280546045 | 0.401 | 0.122 |
| IFNGR23    | 9.97E-122 | 0.5081554   | 0.554 | 0.213 |
| PKIG1      | 1.46E-121 | 0.617691343 | 0.377 | 0.119 |
| FCER1G2    | 1.78E-121 | 0.607861407 | 0.438 | 0.142 |
| CTBP22     | 1.47E-120 | 0.487385236 | 0.319 | 0.09  |
| RNF144B3   | 1.73E-119 | 0.466329078 | 0.484 | 0.169 |
| PPP1R14B1  | 8.24E-119 | 1.013298506 | 0.589 | 0.267 |
| IL3RA2     | 8.41E-119 | 1.042643038 | 0.329 | 0.1   |
| TYMP2      | 8.77E-119 | 0.926198142 | 0.755 | 0.411 |
| MYO1E3     | 3.37E-118 | 0.913676908 | 0.499 | 0.19  |
| ZNF7102    | 2.76E-117 | 0.511798723 | 0.389 | 0.128 |
| TFEC2      | 2.91E-117 | 1.283879184 | 0.316 | 0.093 |
| STX17-AS11 | 3.09E-117 | 0.515724026 | 0.45  | 0.155 |
| ENTPD7     | 3.41E-117 | 0.549114347 | 0.259 | 0.066 |
| C15orf482  | 3.48E-117 | 1.563659746 | 0.319 | 0.095 |
| FARP21     | 5.14E-117 | 0.585880238 | 0.525 | 0.202 |
| MYOF2      | 8.09E-116 | 0.49164498  | 0.278 | 0.074 |
| TCOF12     | 1.33E-115 | 0.554411187 | 0.486 | 0.18  |
| CPVL2      | 1.75E-115 | 1.356672068 | 0.285 | 0.08  |
| MOB3B3     | 4.90E-115 | 0.515246169 | 0.423 | 0.142 |
| HLA-DRB53  | 9.54E-115 | 0.828993496 | 0.578 | 0.235 |
| DUSP51     | 1.34E-114 | 0.991977561 | 0.56  | 0.254 |
| SCIMP1     | 3.21E-114 | 0.546696826 | 0.312 | 0.091 |

|            |           |             |       |       |
|------------|-----------|-------------|-------|-------|
| ICAM12     | 4.20E-114 | 0.357898644 | 0.5   | 0.183 |
| EIF2AK41   | 5.49E-114 | 0.578715506 | 0.467 | 0.177 |
| ALG2       | 1.42E-113 | 0.438420853 | 0.302 | 0.086 |
| TRIO4      | 1.65E-113 | 0.568975628 | 0.652 | 0.277 |
| IRF4       | 2.15E-113 | 1.168398064 | 0.566 | 0.25  |
| RUFY31     | 5.82E-113 | 0.502526175 | 0.41  | 0.139 |
| TGFBR11    | 6.41E-113 | 0.75668454  | 0.461 | 0.175 |
| STX72      | 4.51E-112 | 0.506945449 | 0.587 | 0.24  |
| GAS63      | 5.73E-112 | 0.330432524 | 0.254 | 0.066 |
| GNB42      | 6.24E-112 | 0.297370398 | 0.357 | 0.109 |
| BHLHE403   | 2.64E-111 | 0.779215228 | 0.566 | 0.249 |
| TRAF4      | 1.72E-110 | 0.398590089 | 0.266 | 0.07  |
| UNC93B12   | 2.26E-110 | 0.425773893 | 0.392 | 0.133 |
| PLSCR12    | 3.55E-110 | 0.583804717 | 0.595 | 0.26  |
| MS4A6A2    | 3.77E-110 | 0.827110222 | 0.329 | 0.1   |
| ARPC34     | 1.45E-109 | 0.687803942 | 0.953 | 0.77  |
| CTNND12    | 6.44E-109 | 0.550157988 | 0.399 | 0.137 |
| DBI3       | 6.80E-109 | 0.941904543 | 0.801 | 0.519 |
| GABARAP2   | 2.15E-108 | 0.729864327 | 0.864 | 0.579 |
| VEGFB2     | 3.66E-108 | 0.480083196 | 0.503 | 0.199 |
| MACC1      | 4.30E-108 | 0.619034811 | 0.258 | 0.069 |
| MAN2B12    | 6.54E-108 | 0.45586988  | 0.48  | 0.182 |
| CERS61     | 6.62E-108 | 1.098721938 | 0.521 | 0.227 |
| PPA12      | 1.63E-107 | 1.393787815 | 0.671 | 0.373 |
| DST2       | 6.50E-106 | 0.465384537 | 0.262 | 0.071 |
| GRINA2     | 9.94E-106 | 0.309935365 | 0.347 | 0.109 |
| UVRAG1     | 1.40E-105 | 0.711974805 | 0.775 | 0.41  |
| TSPAN32    | 1.75E-105 | 0.357657634 | 0.39  | 0.132 |
| GABARAPL21 | 1.76E-105 | 0.616333778 | 0.693 | 0.35  |
| RASSF42    | 3.03E-105 | 0.568419804 | 0.259 | 0.071 |
| UBE2F      | 7.15E-105 | 0.509356007 | 0.485 | 0.191 |
| SNX33      | 8.42E-105 | 0.763953164 | 0.79  | 0.454 |
| DBNL3      | 6.04E-104 | 0.516892744 | 0.608 | 0.27  |
| ZMIZ12     | 1.42E-103 | 0.391027217 | 0.449 | 0.163 |
| CDYL1      | 3.13E-103 | 1.024145002 | 0.601 | 0.293 |
| MOB3A2     | 3.53E-103 | 0.59648336  | 0.68  | 0.335 |
| GCA1       | 2.12E-102 | 0.300069673 | 0.427 | 0.154 |
| GDI24      | 1.37E-101 | 0.653429411 | 0.752 | 0.423 |
| MOB1A3     | 1.98E-101 | 0.622501745 | 0.802 | 0.473 |
| MARCKSL12  | 2.73E-101 | 0.903053049 | 0.571 | 0.262 |
| EAF21      | 5.74E-101 | 0.459662605 | 0.403 | 0.144 |
| NEK62      | 3.19E-100 | 0.373426093 | 0.29  | 0.086 |
| SKAP23     | 9.05E-100 | 0.48489369  | 0.635 | 0.287 |

|           |          |             |       |       |
|-----------|----------|-------------|-------|-------|
| SNN       | 7.33E-99 | 0.326101    | 0.293 | 0.088 |
| GNG53     | 1.03E-98 | 0.756625476 | 0.762 | 0.479 |
| MGST22    | 3.20E-98 | 0.27917397  | 0.274 | 0.079 |
| DENND5B2  | 5.41E-98 | 0.452361058 | 0.358 | 0.121 |
| MGLL2     | 6.19E-98 | 0.67455732  | 0.252 | 0.072 |
| ALOX52    | 8.51E-98 | 0.567447241 | 0.369 | 0.131 |
| CYBA3     | 4.42E-97 | 0.649798517 | 0.977 | 0.835 |
| BANK12    | 1.47E-96 | 0.992051853 | 0.498 | 0.209 |
| PTPN13    | 4.57E-96 | 0.753483098 | 0.856 | 0.573 |
| SEL1L32   | 5.99E-96 | 1.017131672 | 0.601 | 0.31  |
| CAT2      | 9.14E-96 | 0.351665623 | 0.368 | 0.128 |
| RP22      | 1.27E-95 | 0.37123086  | 0.369 | 0.126 |
| FCGRT2    | 2.87E-95 | 0.307060297 | 0.428 | 0.158 |
| RASGRP33  | 4.60E-95 | 0.468904588 | 0.408 | 0.15  |
| HES41     | 5.42E-95 | 0.600058721 | 0.274 | 0.081 |
| CHML1     | 1.87E-94 | 0.496532858 | 0.281 | 0.086 |
| CNPY32    | 1.58E-93 | 0.448205383 | 0.567 | 0.249 |
| UGCG      | 1.97E-93 | 0.71426797  | 0.601 | 0.297 |
| SIPA1L31  | 1.99E-93 | 0.597904512 | 0.594 | 0.275 |
| AP1S22    | 3.64E-93 | 0.447275712 | 0.487 | 0.198 |
| CTSS2     | 3.97E-93 | 0.377173563 | 0.851 | 0.493 |
| DLGAP4    | 4.57E-93 | 0.351260111 | 0.403 | 0.145 |
| ZNF5161   | 4.66E-93 | 0.351460124 | 0.265 | 0.078 |
| TNFSF132  | 7.04E-93 | 0.2700472   | 0.255 | 0.072 |
| RAPGEF14  | 8.63E-93 | 0.705807206 | 0.867 | 0.603 |
| REPIN1    | 9.82E-93 | 0.256580327 | 0.263 | 0.076 |
| LGMN2     | 1.10E-92 | 0.320963431 | 0.434 | 0.164 |
| FYTDD11   | 1.18E-92 | 0.780365224 | 0.568 | 0.27  |
| BTK3      | 1.85E-92 | 0.339461679 | 0.369 | 0.129 |
| NUP62     | 2.62E-92 | 0.326085161 | 0.321 | 0.105 |
| PGLS3     | 3.31E-92 | 0.477406702 | 0.59  | 0.276 |
| RALA2     | 1.03E-91 | 1.095204426 | 0.66  | 0.375 |
| HMGA1     | 1.97E-91 | 0.404243101 | 0.512 | 0.216 |
| MCM5      | 3.73E-91 | 0.288244616 | 0.337 | 0.112 |
| APP3      | 4.18E-91 | 0.708457361 | 0.44  | 0.178 |
| GNA123    | 6.12E-91 | 0.581422197 | 0.597 | 0.278 |
| SERPINB62 | 1.11E-90 | 0.329403734 | 0.384 | 0.138 |
| IFNGR13   | 1.30E-90 | 0.516712603 | 0.61  | 0.288 |
| TOR3A1    | 1.53E-90 | 0.44732315  | 0.396 | 0.151 |
| DBNDD22   | 1.80E-90 | 0.342089487 | 0.295 | 0.093 |
| LAT23     | 3.94E-90 | 0.540365466 | 0.431 | 0.172 |
| MAP3K83   | 5.40E-90 | 0.66144443  | 0.742 | 0.418 |
| ARF31     | 9.79E-90 | 0.3273378   | 0.423 | 0.161 |



|             |          |             |       |       |
|-------------|----------|-------------|-------|-------|
| VASP3       | 1.15E-89 | 0.619466276 | 0.638 | 0.331 |
| TENT4A      | 2.57E-89 | 0.530986783 | 0.496 | 0.212 |
| FUOM2       | 4.35E-89 | 0.302495622 | 0.364 | 0.129 |
| SUSD12      | 6.03E-89 | 0.301395138 | 0.254 | 0.074 |
| AF117829.12 | 7.75E-89 | 0.423989445 | 0.365 | 0.131 |
| ATOX13      | 5.15E-88 | 0.506758306 | 0.561 | 0.26  |
| BMP2K3      | 5.21E-88 | 0.626184411 | 0.493 | 0.214 |
| MOB1B       | 1.03E-87 | 0.663110178 | 0.385 | 0.147 |
| AREG1       | 3.05E-87 | 1.385774275 | 0.596 | 0.322 |
| SEC61B2     | 3.21E-87 | 1.194495838 | 0.797 | 0.562 |
| APEX1       | 1.16E-86 | 0.409497182 | 0.537 | 0.239 |
| GPR137B2    | 1.70E-86 | 0.859515918 | 0.49  | 0.232 |
| PSME23      | 1.90E-86 | 0.759981197 | 0.748 | 0.463 |
| PTRHD1      | 3.40E-86 | 0.293254172 | 0.422 | 0.161 |
| MARCKS2     | 4.51E-86 | 0.816095397 | 0.426 | 0.176 |
| SCO21       | 1.12E-85 | 0.302279202 | 0.397 | 0.149 |
| MAP3K132    | 2.52E-85 | 0.496520934 | 0.423 | 0.171 |
| RGS192      | 6.45E-85 | 0.521124472 | 0.483 | 0.21  |
| ACTB3       | 9.27E-85 | 1.062348509 | 0.978 | 0.888 |
| CYSTM11     | 1.09E-84 | 0.367960653 | 0.663 | 0.327 |
| B3GNT52     | 2.55E-84 | 0.548006321 | 0.33  | 0.117 |
| CNDP22      | 2.68E-84 | 0.362332747 | 0.492 | 0.209 |
| PDLIM11     | 2.92E-84 | 0.371466704 | 0.337 | 0.119 |
| SMIM20      | 1.12E-82 | 0.358966302 | 0.376 | 0.143 |
| CDK143      | 2.67E-82 | 0.504581145 | 0.649 | 0.315 |
| PLXDC22     | 3.35E-82 | 0.415472609 | 0.349 | 0.122 |
| SELENOH2    | 8.80E-82 | 0.513177692 | 0.756 | 0.429 |
| ARPC53      | 1.42E-81 | 0.630338053 | 0.805 | 0.517 |
| ADAM19      | 1.54E-81 | 0.484785631 | 0.572 | 0.269 |
| RUBCN1      | 1.59E-81 | 0.800241685 | 0.532 | 0.259 |
| SINHCAF1    | 5.55E-81 | 0.533277508 | 0.586 | 0.282 |
| MB21D22     | 2.13E-80 | 0.512633283 | 0.352 | 0.132 |
| GALNT3      | 2.25E-80 | 0.345437871 | 0.264 | 0.083 |
| SPART2      | 2.76E-80 | 0.314263111 | 0.329 | 0.117 |
| IRF7        | 5.28E-80 | 0.905713108 | 0.482 | 0.224 |
| RAB8B1      | 5.61E-80 | 0.692354462 | 0.813 | 0.523 |
| TPM33       | 6.92E-80 | 0.589567325 | 0.892 | 0.662 |
| KLHL63      | 1.08E-79 | 0.553774849 | 0.557 | 0.267 |
| PLIN32      | 2.65E-79 | 0.269848528 | 0.356 | 0.132 |
| C17orf492   | 8.42E-79 | 0.521341574 | 0.595 | 0.296 |
| HPS52       | 9.33E-79 | 0.418670179 | 0.498 | 0.22  |
| CYB561A31   | 1.44E-78 | 0.372059767 | 0.327 | 0.118 |
| TNFSF91     | 2.92E-78 | 0.452454308 | 0.338 | 0.123 |

|             |          |             |       |       |
|-------------|----------|-------------|-------|-------|
| LAP32       | 3.19E-78 | 0.545192033 | 0.617 | 0.32  |
| P2RX12      | 4.39E-78 | 0.420331108 | 0.261 | 0.085 |
| JADE31      | 1.02E-77 | 0.394787572 | 0.331 | 0.117 |
| RNASET24    | 1.57E-77 | 0.614490005 | 0.826 | 0.551 |
| SIPA1L13    | 1.66E-77 | 0.489170404 | 0.93  | 0.675 |
| TXN3        | 1.81E-77 | 2.32208463  | 0.698 | 0.481 |
| Clorf1622   | 2.13E-77 | 0.644005542 | 0.391 | 0.161 |
| EBF11       | 2.58E-77 | 0.79213943  | 0.445 | 0.193 |
| GLA3        | 3.61E-77 | 0.540680789 | 0.478 | 0.21  |
| NUBP12      | 4.44E-77 | 0.335967891 | 0.395 | 0.155 |
| FNIP22      | 5.49E-77 | 0.30668036  | 0.377 | 0.144 |
| PIKFYVE2    | 1.64E-76 | 0.698592207 | 0.531 | 0.256 |
| RELT1       | 2.01E-76 | 0.26070354  | 0.323 | 0.116 |
| TMEM1311    | 2.07E-76 | 0.607265499 | 0.733 | 0.418 |
| ACAA1       | 2.82E-76 | 0.341272394 | 0.423 | 0.176 |
| SNRNP25     | 3.93E-76 | 0.268011461 | 0.311 | 0.11  |
| DSE2        | 9.04E-76 | 0.340380051 | 0.453 | 0.189 |
| GAB23       | 9.75E-76 | 0.447465607 | 0.64  | 0.323 |
| SNHG15      | 1.89E-75 | 0.476601188 | 0.502 | 0.232 |
| KDM6B3      | 2.75E-75 | 0.413909785 | 0.64  | 0.312 |
| TMSB103     | 3.47E-75 | 0.940449851 | 0.993 | 0.932 |
| RIPOR1      | 3.57E-75 | 0.341966866 | 0.255 | 0.082 |
| MEF2A2      | 6.40E-75 | 0.569416341 | 0.738 | 0.41  |
| AP003086.11 | 6.68E-75 | 0.356429756 | 0.478 | 0.209 |
| PRMT91      | 7.22E-75 | 0.77980437  | 0.486 | 0.232 |
| NFKB12      | 8.87E-75 | 0.61531951  | 0.86  | 0.595 |
| MFSD122     | 1.38E-74 | 0.30034036  | 0.345 | 0.131 |
| APPL11      | 1.75E-74 | 0.33227555  | 0.515 | 0.228 |
| SUMO32      | 7.64E-74 | 0.314730891 | 0.526 | 0.242 |
| DCK1        | 8.82E-74 | 0.294440516 | 0.374 | 0.145 |
| RHOQ3       | 1.09E-73 | 0.41961135  | 0.505 | 0.228 |
| GM2A2       | 1.56E-73 | 0.2872687   | 0.316 | 0.116 |
| EPB41L22    | 1.81E-73 | 0.451285427 | 0.379 | 0.152 |
| MIR155HG1   | 1.87E-73 | 1.220676612 | 0.43  | 0.199 |
| PACSIN21    | 2.39E-73 | 0.433138033 | 0.554 | 0.267 |
| AC083837.11 | 3.32E-73 | 0.390746592 | 0.266 | 0.089 |
| MANBA3      | 5.44E-73 | 0.428760034 | 0.655 | 0.335 |
| BCAR31      | 7.84E-73 | 0.537551355 | 0.26  | 0.088 |
| TCTN3       | 1.29E-72 | 0.51969927  | 0.335 | 0.13  |
| ATP6V0B3    | 1.59E-72 | 0.463988585 | 0.656 | 0.363 |
| TBC1D81     | 1.75E-72 | 0.476959978 | 0.43  | 0.189 |
| TUBB2       | 2.93E-72 | 0.47900827  | 0.556 | 0.278 |
| GAB12       | 4.48E-72 | 0.473584171 | 0.336 | 0.131 |

|             |          |             |       |       |
|-------------|----------|-------------|-------|-------|
| POGLUT1     | 6.39E-72 | 0.563493388 | 0.276 | 0.097 |
| SERPINB12   | 6.61E-72 | 0.944457269 | 0.668 | 0.394 |
| FTH13       | 6.76E-72 | 0.434919964 | 0.995 | 0.942 |
| MALT13      | 6.79E-72 | 0.811936714 | 0.811 | 0.553 |
| EDEM13      | 8.26E-72 | 0.387616538 | 0.518 | 0.241 |
| PIK3AP13    | 8.87E-72 | 0.315523026 | 0.478 | 0.209 |
| SH3GL1      | 2.17E-71 | 0.322159738 | 0.338 | 0.13  |
| AP2S13      | 2.46E-71 | 0.449208504 | 0.593 | 0.304 |
| ADCY32      | 2.78E-71 | 0.457974735 | 0.336 | 0.131 |
| AC120193.12 | 2.91E-71 | 0.66473335  | 0.433 | 0.19  |
| LYZ2        | 4.21E-71 | 0.817661099 | 0.345 | 0.135 |
| CEP1703     | 5.33E-71 | 0.431149043 | 0.531 | 0.246 |
| KBTBD8      | 8.00E-71 | 0.277447299 | 0.265 | 0.089 |
| AC004687.11 | 8.71E-71 | 0.313898905 | 0.332 | 0.125 |
| KLF102      | 1.05E-70 | 0.351096717 | 0.34  | 0.132 |
| N4BP2L11    | 1.22E-70 | 0.571743727 | 0.462 | 0.214 |
| PRMT1       | 1.28E-70 | 0.353113889 | 0.526 | 0.25  |
| MS4A11      | 1.43E-70 | 1.067872326 | 0.412 | 0.191 |
| DUSP22      | 3.19E-70 | 0.351519754 | 0.352 | 0.14  |
| MYL12A1     | 3.58E-70 | 0.538543045 | 0.916 | 0.708 |
| HIVEP12     | 4.00E-70 | 0.76084603  | 0.69  | 0.406 |
| CHMP4B1     | 4.35E-70 | 0.348358286 | 0.487 | 0.223 |
| NQO22       | 7.34E-70 | 0.341558011 | 0.317 | 0.121 |
| NAGK2       | 9.11E-70 | 0.527289851 | 0.411 | 0.174 |
| ZNF433-AS11 | 1.29E-69 | 0.356653187 | 0.412 | 0.174 |
| ATP6V0D12   | 2.44E-69 | 0.327491571 | 0.607 | 0.295 |
| PFN14       | 4.44E-69 | 0.62811981  | 0.944 | 0.769 |
| PTPN61      | 5.34E-69 | 0.435380358 | 0.49  | 0.23  |
| SRGAP23     | 5.96E-69 | 0.450424747 | 0.543 | 0.267 |
| GOLIM42     | 1.41E-68 | 0.321748824 | 0.317 | 0.119 |
| VPS352      | 2.25E-68 | 0.352567153 | 0.489 | 0.226 |
| EIF4A13     | 3.50E-68 | 0.557096635 | 0.924 | 0.717 |
| GSTP13      | 3.85E-68 | 0.954073579 | 0.683 | 0.458 |
| IRF2BP21    | 4.00E-68 | 0.519629182 | 0.552 | 0.282 |
| NR4A23      | 4.02E-68 | 0.640627905 | 0.8   | 0.512 |
| RNASEK3     | 6.79E-68 | 0.458057092 | 0.875 | 0.648 |
| ARL5B1      | 6.94E-68 | 0.393521957 | 0.366 | 0.149 |
| MTPN2       | 9.98E-68 | 0.475079857 | 0.794 | 0.488 |
| COX5A2      | 1.41E-67 | 0.449238332 | 0.725 | 0.444 |
| ARPC23      | 2.06E-67 | 0.551110689 | 0.94  | 0.779 |
| CLIC14      | 2.28E-67 | 0.546003792 | 0.889 | 0.667 |
| FCGR2B3     | 2.30E-67 | 0.499356887 | 0.314 | 0.126 |
| ATAD2B1     | 2.65E-67 | 0.398075531 | 0.632 | 0.325 |

|            |          |             |       |       |
|------------|----------|-------------|-------|-------|
| UBXN2A     | 3.09E-67 | 0.304510078 | 0.42  | 0.18  |
| CXXC5      | 3.25E-67 | 0.313118436 | 0.27  | 0.096 |
| TET21      | 3.49E-67 | 0.473522358 | 0.764 | 0.453 |
| TMSB4X2    | 3.72E-67 | 0.62346023  | 0.996 | 0.951 |
| SLAMF73    | 3.79E-67 | 0.722226581 | 0.359 | 0.154 |
| ADAM281    | 5.26E-67 | 0.460394713 | 0.517 | 0.249 |
| CCR72      | 6.31E-67 | 0.836602134 | 0.525 | 0.265 |
| SLC25A332  | 7.73E-67 | 0.387536029 | 0.482 | 0.221 |
| NINJ12     | 1.67E-66 | 0.450764519 | 0.41  | 0.181 |
| SLC66A22   | 2.08E-66 | 0.295120258 | 0.426 | 0.185 |
| ENTPD13    | 2.21E-66 | 0.567394694 | 0.484 | 0.24  |
| TMEM14C1   | 1.24E-65 | 0.401758001 | 0.476 | 0.227 |
| DCTPP1     | 1.52E-65 | 0.269827984 | 0.284 | 0.103 |
| CLN82      | 1.65E-65 | 0.364025269 | 0.348 | 0.142 |
| AKR1A12    | 2.07E-65 | 0.330948044 | 0.494 | 0.232 |
| G0S22      | 2.13E-65 | 0.911452895 | 0.277 | 0.102 |
| IER52      | 2.77E-65 | 0.76882475  | 0.679 | 0.423 |
| RASGEF1B3  | 3.65E-65 | 0.4886963   | 0.673 | 0.369 |
| RILPL23    | 5.51E-65 | 0.451658873 | 0.751 | 0.439 |
| LSP12      | 1.03E-64 | 0.592528065 | 0.735 | 0.461 |
| RGS23      | 1.24E-64 | 0.766972956 | 0.79  | 0.544 |
| DDX211     | 1.47E-64 | 0.514464958 | 0.831 | 0.538 |
| HMG31      | 1.90E-64 | 0.439527028 | 0.57  | 0.293 |
| AFDN1      | 2.55E-64 | 0.413855074 | 0.308 | 0.12  |
| SIRPA2     | 2.55E-64 | 0.267811364 | 0.257 | 0.089 |
| H3F3A3     | 3.92E-64 | 0.482027788 | 0.987 | 0.89  |
| AMZ12      | 4.32E-64 | 0.296293953 | 0.336 | 0.134 |
| PPIF2      | 5.51E-64 | 0.495229607 | 0.365 | 0.157 |
| LACTB2     | 2.79E-63 | 0.287863802 | 0.381 | 0.161 |
| ST8SIA4    | 3.18E-63 | 0.688495392 | 0.593 | 0.334 |
| SLC25A52   | 7.60E-63 | 0.49320771  | 0.756 | 0.479 |
| GNAQ2      | 8.65E-63 | 0.495233897 | 0.485 | 0.237 |
| LAMTOR13   | 1.46E-62 | 0.346009197 | 0.556 | 0.282 |
| H2AFY3     | 2.00E-62 | 0.538826467 | 0.584 | 0.32  |
| BAG1       | 2.74E-62 | 0.323594324 | 0.492 | 0.238 |
| FBRSL1     | 2.84E-62 | 0.262677154 | 0.399 | 0.171 |
| TRAK12     | 3.86E-62 | 0.354915327 | 0.591 | 0.303 |
| YBX13      | 4.37E-62 | 0.406921388 | 0.948 | 0.771 |
| UPF21      | 4.71E-62 | 0.486781833 | 0.597 | 0.322 |
| EHBP1L12   | 5.38E-62 | 0.258364587 | 0.381 | 0.161 |
| SERPINB91  | 5.80E-62 | 0.867228553 | 0.811 | 0.595 |
| RALGPS22   | 7.26E-62 | 0.468740711 | 0.484 | 0.232 |
| TNFRSF10B2 | 1.25E-61 | 0.382180806 | 0.396 | 0.174 |

|             |          |             |       |       |
|-------------|----------|-------------|-------|-------|
| INPP5F2     | 1.70E-61 | 0.429046654 | 0.449 | 0.203 |
| SOX41       | 2.71E-61 | 0.900563894 | 0.348 | 0.15  |
| RELB        | 2.78E-61 | 0.480938358 | 0.712 | 0.417 |
| GPX43       | 3.93E-61 | 0.644924283 | 0.743 | 0.479 |
| M6PR2       | 4.93E-61 | 0.361093428 | 0.556 | 0.283 |
| RNF1302     | 5.32E-61 | 0.412619568 | 0.471 | 0.22  |
| TEX143      | 5.45E-61 | 0.673463486 | 0.555 | 0.296 |
| PTMS2       | 6.36E-61 | 0.371726941 | 0.481 | 0.233 |
| TPM43       | 6.87E-61 | 0.430461494 | 0.72  | 0.449 |
| EIF5A1      | 1.45E-60 | 0.318899181 | 0.592 | 0.306 |
| PYCARD3     | 1.50E-60 | 0.539126959 | 0.499 | 0.26  |
| ATG32       | 1.53E-60 | 0.382685759 | 0.538 | 0.279 |
| TALDO13     | 1.78E-60 | 0.310390332 | 0.593 | 0.315 |
| ATP6V1F3    | 2.23E-60 | 0.370613366 | 0.706 | 0.41  |
| IGFLR11     | 2.63E-60 | 0.336030632 | 0.52  | 0.259 |
| OGFRL12     | 2.69E-60 | 0.511937447 | 0.469 | 0.231 |
| LYSMD2      | 6.95E-60 | 0.272242931 | 0.355 | 0.148 |
| BCAT12      | 7.48E-60 | 0.322753515 | 0.304 | 0.119 |
| EEF1G2      | 8.99E-60 | 0.421906867 | 0.967 | 0.841 |
| ST3GAL5     | 9.17E-60 | 0.408682554 | 0.37  | 0.163 |
| COTL13      | 1.00E-59 | 0.839825831 | 0.771 | 0.55  |
| ENTPD1-AS11 | 1.15E-59 | 0.378110749 | 0.474 | 0.227 |
| YWHAH2      | 1.40E-59 | 0.649722494 | 0.519 | 0.274 |
| EIF61       | 3.98E-59 | 0.301051088 | 0.523 | 0.259 |
| GNA133      | 6.98E-59 | 0.454651766 | 0.733 | 0.445 |
| PIM31       | 9.64E-59 | 0.461233222 | 0.513 | 0.262 |
| CHPT11      | 1.48E-58 | 0.341797793 | 0.485 | 0.234 |
| LAPTM4A2    | 1.54E-58 | 0.361182211 | 0.627 | 0.341 |
| PUS10       | 1.72E-58 | 0.269457684 | 0.272 | 0.102 |
| BLK1        | 2.02E-58 | 0.536459026 | 0.314 | 0.129 |
| SAT13       | 2.46E-58 | 0.591768101 | 0.947 | 0.779 |
| CD2AP1      | 3.33E-58 | 0.615580948 | 0.568 | 0.312 |
| UBA522      | 3.36E-58 | 0.391488411 | 0.983 | 0.898 |
| NCF11       | 4.45E-58 | 0.386835756 | 0.439 | 0.209 |
| UST3        | 7.20E-58 | 0.393745608 | 0.571 | 0.291 |
| POLD42      | 1.15E-57 | 0.403505446 | 0.648 | 0.366 |
| RRBP13      | 1.51E-57 | 0.575477003 | 0.483 | 0.252 |
| CD723       | 1.52E-57 | 0.377811614 | 0.365 | 0.16  |
| TOMM61      | 1.84E-57 | 0.387426643 | 0.761 | 0.47  |
| BRI33       | 2.29E-57 | 0.26768013  | 0.614 | 0.333 |
| CAPNS12     | 2.44E-57 | 0.27877786  | 0.494 | 0.238 |
| RNH13       | 2.73E-57 | 0.422955663 | 0.586 | 0.325 |
| CKS21       | 3.50E-57 | 0.450986031 | 0.465 | 0.226 |

|           |          |             |       |       |
|-----------|----------|-------------|-------|-------|
| ZBTB102   | 4.07E-57 | 0.421362074 | 0.413 | 0.192 |
| LGALS13   | 6.47E-57 | 0.965850804 | 0.681 | 0.452 |
| ATP6V0E11 | 7.17E-57 | 0.422323136 | 0.899 | 0.666 |
| PRKCE2    | 7.41E-57 | 0.340700561 | 0.704 | 0.398 |
| ARHGAP242 | 8.54E-57 | 0.573381628 | 0.439 | 0.213 |
| TMEM39A   | 9.00E-57 | 0.485289338 | 0.377 | 0.171 |
| ETS22     | 9.09E-57 | 0.314321225 | 0.351 | 0.149 |
| HOOK31    | 1.03E-56 | 0.354548523 | 0.642 | 0.353 |
| RAB8A     | 1.17E-56 | 0.300767021 | 0.56  | 0.29  |
| C1QBP     | 1.20E-56 | 0.306362445 | 0.582 | 0.307 |
| ACTG11    | 1.39E-56 | 0.733083532 | 0.953 | 0.836 |
| PFDN21    | 1.50E-56 | 0.308893662 | 0.607 | 0.326 |
| ZFH32     | 1.74E-56 | 0.251473276 | 0.294 | 0.116 |
| GPR652    | 2.38E-56 | 0.578853087 | 0.477 | 0.243 |
| LAMTOR22  | 3.03E-56 | 0.292512004 | 0.483 | 0.24  |
| FGL22     | 3.04E-56 | 0.425168178 | 0.32  | 0.136 |
| TNFSF13B2 | 5.41E-56 | 0.335668148 | 0.352 | 0.151 |
| SLC27A41  | 6.15E-56 | 0.307785763 | 0.521 | 0.263 |
| PHB21     | 1.54E-55 | 0.28517792  | 0.577 | 0.297 |
| RREB13    | 2.37E-55 | 0.419830524 | 0.466 | 0.23  |
| ARPC1B4   | 2.53E-55 | 0.535568268 | 0.874 | 0.627 |
| MAP4K42   | 2.54E-55 | 0.404510404 | 0.822 | 0.545 |
| DMXL11    | 2.87E-55 | 0.371510037 | 0.579 | 0.308 |
| MICAL31   | 3.38E-55 | 0.350552138 | 0.395 | 0.18  |
| INSR2     | 3.41E-55 | 0.352142094 | 0.26  | 0.1   |
| PHB1      | 6.73E-55 | 0.264431195 | 0.504 | 0.252 |
| SH3BP53   | 8.29E-55 | 0.394341878 | 0.555 | 0.302 |
| AUTS23    | 8.72E-55 | 0.41849024  | 0.561 | 0.293 |
| RAC13     | 1.18E-54 | 0.527656417 | 0.767 | 0.538 |
| ARHGAP53  | 1.56E-54 | 0.361607105 | 0.474 | 0.232 |
| NUB11     | 1.81E-54 | 0.506672137 | 0.512 | 0.268 |
| DDT1      | 1.84E-54 | 0.307429183 | 0.67  | 0.385 |
| PRR131    | 1.87E-54 | 0.327073965 | 0.719 | 0.422 |
| VOPP11    | 2.29E-54 | 0.534045225 | 0.687 | 0.422 |
| COX171    | 2.85E-54 | 0.284725975 | 0.612 | 0.331 |
| RBX11     | 3.10E-54 | 0.338785904 | 0.702 | 0.416 |
| HIP12     | 4.36E-54 | 0.584920671 | 0.367 | 0.17  |
| PEAK13    | 4.85E-54 | 0.373986511 | 0.477 | 0.238 |
| VIM4      | 6.20E-54 | 0.96270297  | 0.887 | 0.763 |
| PRELID13  | 9.38E-54 | 0.44963982  | 0.665 | 0.407 |
| CAP13     | 9.40E-54 | 0.434102858 | 0.719 | 0.458 |
| SRGAP2B2  | 1.24E-53 | 0.285226392 | 0.315 | 0.132 |
| PPIA1     | 1.57E-53 | 0.378682579 | 0.946 | 0.822 |

|             |          |             |       |       |
|-------------|----------|-------------|-------|-------|
| STRBP1      | 1.73E-53 | 0.376829019 | 0.527 | 0.274 |
| TNFRSF13C1  | 2.33E-53 | 0.709199426 | 0.377 | 0.185 |
| TRABD       | 3.34E-53 | 0.252771284 | 0.493 | 0.246 |
| SLC25A25    | 4.60E-53 | 0.294285786 | 0.296 | 0.121 |
| TFEB        | 4.82E-53 | 0.314753401 | 0.295 | 0.122 |
| AC008014.12 | 5.21E-53 | 0.382656618 | 0.359 | 0.162 |
| SERF23      | 5.33E-53 | 0.407896666 | 0.976 | 0.857 |
| SLC25A62    | 6.38E-53 | 0.424034358 | 0.923 | 0.703 |
| AC007952.42 | 8.87E-53 | 0.304905037 | 0.352 | 0.159 |
| VAV22       | 1.11E-52 | 0.277734414 | 0.252 | 0.097 |
| DRAM22      | 1.30E-52 | 0.368559681 | 0.45  | 0.223 |
| EIF3L2      | 1.33E-52 | 0.38475791  | 0.675 | 0.383 |
| GRB23       | 1.48E-52 | 0.356456596 | 0.858 | 0.595 |
| GNG102      | 2.22E-52 | 0.304460417 | 0.415 | 0.203 |
| SSR33       | 4.05E-52 | 0.387648404 | 0.63  | 0.356 |
| LCP12       | 6.38E-52 | 0.58927433  | 0.847 | 0.646 |
| CFL13       | 3.37E-51 | 0.512549981 | 0.946 | 0.825 |
| SERP12      | 3.43E-51 | 0.368076444 | 0.904 | 0.676 |
| IFITM32     | 4.99E-51 | 0.874093403 | 0.373 | 0.184 |
| STK38L1     | 6.50E-51 | 0.352749791 | 0.426 | 0.211 |
| CHCHD102    | 6.91E-51 | 0.334512018 | 0.649 | 0.371 |
| PDIA32      | 7.45E-51 | 0.499106386 | 0.766 | 0.534 |
| POLB        | 8.26E-51 | 0.817362556 | 0.323 | 0.149 |
| PHLDA22     | 2.17E-50 | 0.472545268 | 0.266 | 0.109 |
| RASSF51     | 3.05E-50 | 0.347892497 | 0.621 | 0.348 |
| PHPT11      | 7.60E-50 | 0.262140556 | 0.554 | 0.3   |
| SSR11       | 1.10E-49 | 0.311891059 | 0.476 | 0.248 |
| LTB4        | 2.14E-49 | 0.67430463  | 0.703 | 0.441 |
| CDC373      | 2.37E-49 | 0.372378146 | 0.686 | 0.41  |
| PAX51       | 2.48E-49 | 0.458579231 | 0.29  | 0.124 |
| TWISTNB1    | 3.64E-49 | 0.465664482 | 0.451 | 0.23  |
| SLC9A71     | 8.82E-49 | 0.348288031 | 0.319 | 0.141 |
| SNX22       | 9.22E-49 | 0.351975655 | 0.697 | 0.408 |
| ACTR33      | 1.39E-48 | 0.361725994 | 0.829 | 0.592 |
| SCPEP13     | 1.55E-48 | 0.287455484 | 0.351 | 0.161 |
| UTP61       | 1.72E-48 | 0.252611586 | 0.396 | 0.182 |
| EFHD22      | 1.84E-48 | 0.403274525 | 0.6   | 0.349 |
| RFTN11      | 2.50E-48 | 0.58121751  | 0.792 | 0.571 |
| CNN21       | 3.00E-48 | 0.254768308 | 0.541 | 0.29  |
| ZFAND61     | 3.09E-48 | 0.359606801 | 0.782 | 0.495 |
| POMP3       | 3.78E-48 | 0.411668224 | 0.799 | 0.549 |
| TUBA1B3     | 4.52E-48 | 0.589939723 | 0.793 | 0.563 |
| RACK12      | 5.94E-48 | 0.373819756 | 0.98  | 0.891 |

|             |          |             |       |       |
|-------------|----------|-------------|-------|-------|
| COBLL12     | 1.03E-47 | 0.311183512 | 0.342 | 0.157 |
| SGK12       | 1.69E-47 | 0.385188333 | 0.418 | 0.212 |
| PALM2-AKAP2 | 1.70E-47 | 0.451552691 | 0.411 | 0.209 |
| VAMP83      | 3.85E-47 | 0.53361864  | 0.696 | 0.474 |
| CSNK2B1     | 3.89E-47 | 0.273521557 | 0.586 | 0.324 |
| RHEB2       | 6.41E-47 | 0.378879633 | 0.677 | 0.411 |
| VDAC21      | 6.86E-47 | 0.272944785 | 0.653 | 0.385 |
| VPS292      | 7.50E-47 | 0.287391491 | 0.592 | 0.339 |
| PLAGL11     | 8.34E-47 | 0.263364506 | 0.286 | 0.122 |
| ATP5F1E2    | 3.79E-46 | 0.337897167 | 0.968 | 0.849 |
| OAZ12       | 4.31E-46 | 0.342774436 | 0.975 | 0.862 |
| NAAA2       | 6.92E-46 | 0.320669437 | 0.314 | 0.141 |
| TAPBP       | 7.08E-46 | 0.307222953 | 0.756 | 0.47  |
| TAP11       | 1.12E-45 | 0.285344167 | 0.499 | 0.264 |
| RHBDF23     | 1.30E-45 | 0.257792283 | 0.414 | 0.205 |
| RAB5C3      | 1.38E-45 | 0.251789289 | 0.631 | 0.354 |
| TAGLN21     | 1.41E-45 | 0.383498996 | 0.795 | 0.549 |
| ANXA113     | 1.77E-45 | 0.334864711 | 0.613 | 0.358 |
| UBE2E12     | 2.32E-45 | 0.319746201 | 0.515 | 0.279 |
| UCP23       | 2.84E-45 | 0.348010624 | 0.679 | 0.409 |
| PBX31       | 3.25E-45 | 0.762864767 | 0.482 | 0.266 |
| ECE11       | 3.27E-45 | 0.384151542 | 0.427 | 0.222 |
| ENY21       | 3.47E-45 | 0.273551711 | 0.698 | 0.426 |
| MED13L2     | 3.79E-45 | 0.395986052 | 0.832 | 0.594 |
| PKM3        | 4.96E-45 | 0.387277541 | 0.669 | 0.419 |
| NGLY11      | 5.37E-45 | 0.413662329 | 0.571 | 0.325 |
| PLCG22      | 5.61E-45 | 0.279765227 | 0.547 | 0.301 |
| GRSF11      | 6.70E-45 | 0.357962191 | 0.386 | 0.189 |
| JAK2        | 1.05E-44 | 0.307687044 | 0.407 | 0.202 |
| STAP12      | 1.13E-44 | 0.345133012 | 0.268 | 0.114 |
| USP6NL2     | 1.43E-44 | 0.327302275 | 0.294 | 0.131 |
| IFT571      | 1.79E-44 | 0.373283392 | 0.425 | 0.219 |
| MTHFD1L1    | 1.93E-44 | 0.261506273 | 0.344 | 0.16  |
| GEM1        | 2.27E-44 | 0.387348026 | 0.294 | 0.13  |
| AC104365.12 | 3.27E-44 | 0.284546166 | 0.448 | 0.229 |
| STEAP1B3    | 3.38E-44 | 0.478022237 | 0.493 | 0.259 |
| PSMA21      | 3.73E-44 | 0.314040733 | 0.693 | 0.444 |
| CD221       | 4.38E-44 | 0.358998897 | 0.274 | 0.119 |
| ARFGAP31    | 5.36E-44 | 0.331370151 | 0.501 | 0.274 |
| MX12        | 8.70E-44 | 0.439882667 | 0.548 | 0.318 |
| TAF101      | 8.99E-44 | 0.257463253 | 0.641 | 0.38  |
| ORAI21      | 9.48E-44 | 0.329381996 | 0.406 | 0.208 |
| ARPC41      | 1.24E-43 | 0.28287594  | 0.65  | 0.38  |



|             |          |             |       |       |
|-------------|----------|-------------|-------|-------|
| INSIG12     | 1.71E-43 | 0.515259676 | 0.458 | 0.252 |
| CD79A2      | 1.94E-43 | 0.768198039 | 0.436 | 0.246 |
| RBBP82      | 3.93E-43 | 0.280866942 | 0.394 | 0.196 |
| OTUD13      | 5.38E-43 | 0.385516043 | 0.415 | 0.217 |
| MKNK21      | 5.77E-43 | 0.271215513 | 0.501 | 0.271 |
| OSTC1       | 6.97E-43 | 0.276137465 | 0.532 | 0.302 |
| PLEKHG11    | 8.66E-43 | 0.386235307 | 0.471 | 0.252 |
| ATP5MF1     | 1.09E-42 | 0.285254773 | 0.693 | 0.44  |
| BRK11       | 1.33E-42 | 0.285098166 | 0.671 | 0.416 |
| SUB12       | 1.87E-42 | 0.422267443 | 0.889 | 0.75  |
| BCL2L112    | 2.02E-42 | 0.381545656 | 0.591 | 0.359 |
| BCL2L13     | 2.25E-42 | 0.268393052 | 0.354 | 0.171 |
| FAU2        | 2.41E-42 | 0.333196056 | 0.98  | 0.914 |
| HIGD2A1     | 1.10E-41 | 0.291436544 | 0.739 | 0.461 |
| PPIB2       | 1.27E-41 | 0.459050069 | 0.776 | 0.567 |
| CDC421      | 1.65E-41 | 0.35432961  | 0.912 | 0.741 |
| LAPTM53     | 2.13E-41 | 0.387692624 | 0.925 | 0.701 |
| DENND1B1    | 2.96E-41 | 0.430285349 | 0.587 | 0.354 |
| PSMB33      | 6.47E-41 | 0.286821174 | 0.697 | 0.446 |
| CCDC1382    | 7.93E-41 | 0.494896609 | 0.429 | 0.229 |
| GNAI22      | 8.25E-41 | 0.361220908 | 0.78  | 0.542 |
| UBE2A1      | 9.04E-41 | 0.25846858  | 0.595 | 0.341 |
| CD1092      | 1.00E-40 | 0.427717312 | 0.285 | 0.13  |
| C12orf751   | 1.50E-40 | 0.552576534 | 0.32  | 0.157 |
| SRP141      | 1.84E-40 | 0.374840798 | 0.927 | 0.776 |
| ACTR22      | 3.05E-40 | 0.339689823 | 0.858 | 0.633 |
| FHIT3       | 3.76E-40 | 0.273586198 | 0.329 | 0.158 |
| RBM32       | 4.39E-40 | 0.342158295 | 0.811 | 0.561 |
| MYO9B2      | 5.02E-40 | 0.291190195 | 0.644 | 0.391 |
| DRAP12      | 7.18E-40 | 0.297036615 | 0.685 | 0.447 |
| PDE4A1      | 8.35E-40 | 0.328701851 | 0.531 | 0.305 |
| MIR181A1HG2 | 8.37E-40 | 0.366156348 | 0.358 | 0.18  |
| COX6B12     | 1.54E-39 | 0.258305508 | 0.854 | 0.611 |
| ACSL32      | 2.51E-39 | 0.353441999 | 0.502 | 0.281 |
| RTN42       | 2.76E-39 | 0.393154902 | 0.732 | 0.497 |
| SQSTM12     | 3.13E-39 | 0.392337765 | 0.875 | 0.686 |
| CLEC16A1    | 4.82E-39 | 0.283360624 | 0.471 | 0.254 |
| POU2F21     | 5.26E-39 | 0.452397049 | 0.459 | 0.264 |
| CYSLTR1     | 5.89E-39 | 0.252375438 | 0.252 | 0.109 |
| SLC20A11    | 6.99E-39 | 0.458410119 | 0.507 | 0.293 |
| OXSR11      | 9.34E-39 | 0.32521194  | 0.543 | 0.322 |
| TBCA1       | 9.40E-39 | 0.287892494 | 0.771 | 0.512 |
| HMG12       | 9.79E-39 | 0.278562264 | 0.847 | 0.594 |

|             |          |             |       |       |
|-------------|----------|-------------|-------|-------|
| CHCHD2      | 1.33E-38 | 0.298594508 | 0.923 | 0.765 |
| HINT12      | 1.66E-38 | 0.341650835 | 0.903 | 0.741 |
| TACC12      | 2.36E-38 | 0.295573387 | 0.67  | 0.418 |
| NBDY2       | 2.50E-38 | 0.262415121 | 0.624 | 0.362 |
| CCT81       | 2.70E-38 | 0.265316081 | 0.631 | 0.382 |
| ACER32      | 7.02E-38 | 0.310528344 | 0.39  | 0.203 |
| NIN1        | 7.58E-38 | 0.321678418 | 0.601 | 0.359 |
| MYL63       | 7.72E-38 | 0.427923553 | 0.952 | 0.83  |
| USP122      | 1.58E-37 | 0.421839081 | 0.614 | 0.387 |
| SMDT12      | 1.69E-37 | 0.272067156 | 0.782 | 0.503 |
| NAPA2       | 2.07E-37 | 0.323465107 | 0.589 | 0.348 |
| EZR1        | 2.42E-37 | 0.552253217 | 0.942 | 0.806 |
| RHOA3       | 4.22E-37 | 0.292745523 | 0.886 | 0.688 |
| AC253572.21 | 4.87E-37 | 0.293005096 | 0.251 | 0.113 |
| PSME13      | 1.39E-36 | 0.300929049 | 0.837 | 0.625 |
| MTHFD21     | 2.25E-36 | 0.351665941 | 0.533 | 0.324 |
| CPNE3       | 3.48E-36 | 0.359931927 | 0.411 | 0.221 |
| SET2        | 3.95E-36 | 0.254780315 | 0.81  | 0.561 |
| SEC61G1     | 5.47E-36 | 0.292151686 | 0.66  | 0.424 |
| TXNRD12     | 7.09E-36 | 0.265112043 | 0.695 | 0.441 |
| CLINT1      | 1.07E-35 | 0.25555078  | 0.617 | 0.376 |
| ATP5F1B1    | 1.14E-35 | 0.261624605 | 0.679 | 0.436 |
| ANXA61      | 2.01E-35 | 0.270028113 | 0.555 | 0.326 |
| LSM72       | 2.05E-35 | 0.294803839 | 0.709 | 0.45  |
| SPCS12      | 2.08E-35 | 0.3724733   | 0.723 | 0.491 |
| CALR2       | 2.28E-35 | 0.379533781 | 0.79  | 0.575 |
| PTPRE2      | 2.54E-35 | 0.432689476 | 0.375 | 0.207 |
| GPSM31      | 2.58E-35 | 0.279648349 | 0.669 | 0.42  |
| ERP292      | 2.98E-35 | 0.313858282 | 0.76  | 0.523 |
| CD1642      | 5.43E-35 | 0.352940864 | 0.741 | 0.51  |
| EEF1B22     | 6.24E-35 | 0.342823639 | 0.968 | 0.84  |
| PRDX62      | 8.38E-35 | 0.388100305 | 0.647 | 0.425 |
| BST22       | 1.79E-34 | 0.29127173  | 0.654 | 0.422 |
| ATP5MC31    | 2.03E-34 | 0.262414692 | 0.707 | 0.482 |
| ITSN21      | 2.34E-34 | 0.315562175 | 0.799 | 0.549 |
| EEF1A13     | 4.49E-34 | 0.265213532 | 0.996 | 0.957 |
| GNL3        | 7.26E-34 | 0.255564585 | 0.465 | 0.263 |
| ANKRD111    | 9.31E-34 | 0.355690127 | 0.92  | 0.738 |
| UQCRH2      | 1.02E-33 | 0.291937241 | 0.865 | 0.64  |
| PPT12       | 1.32E-33 | 0.277209317 | 0.365 | 0.192 |
| PARK73      | 1.80E-33 | 0.273300524 | 0.779 | 0.568 |
| VRK21       | 1.97E-33 | 0.262789199 | 0.462 | 0.26  |
| IFI44L1     | 2.28E-33 | 0.427620147 | 0.337 | 0.18  |

|           |          |             |       |       |
|-----------|----------|-------------|-------|-------|
| NACA2     | 3.52E-33 | 0.253333217 | 0.985 | 0.893 |
| WDFY21    | 3.85E-33 | 0.261382108 | 0.514 | 0.298 |
| COX6A11   | 4.26E-33 | 0.252661107 | 0.804 | 0.573 |
| SELENOS1  | 4.52E-33 | 0.296343882 | 0.477 | 0.277 |
| METRNL3   | 1.05E-32 | 0.269179281 | 0.547 | 0.337 |
| RGS105    | 1.10E-32 | 0.429075325 | 0.611 | 0.408 |
| PFKFB31   | 2.04E-32 | 0.257263795 | 0.64  | 0.413 |
| PDLIM51   | 2.38E-32 | 0.273116498 | 0.372 | 0.2   |
| ZFAS11    | 3.37E-32 | 0.329840697 | 0.945 | 0.75  |
| PSMB92    | 4.47E-32 | 0.3051135   | 0.771 | 0.541 |
| SNHG292   | 6.10E-32 | 0.273039509 | 0.877 | 0.668 |
| DSTN      | 6.82E-32 | 0.305280696 | 0.446 | 0.264 |
| PFDN52    | 6.97E-32 | 0.265675587 | 0.965 | 0.834 |
| BZW11     | 1.73E-31 | 0.265861193 | 0.76  | 0.527 |
| ANKRD13A1 | 1.40E-30 | 0.258405302 | 0.421 | 0.242 |
| JAML3     | 2.03E-30 | 0.402451698 | 0.369 | 0.209 |
| REV3L2    | 2.81E-30 | 0.385648175 | 0.704 | 0.484 |
| ATP6V1G11 | 4.33E-30 | 0.254132653 | 0.826 | 0.589 |
| STMN1     | 5.31E-30 | 0.259489714 | 0.311 | 0.164 |
| TPI12     | 7.89E-30 | 0.322617675 | 0.73  | 0.514 |
| ENO13     | 1.67E-29 | 0.320922685 | 0.755 | 0.557 |
| CHMP1B2   | 2.37E-29 | 0.300053575 | 0.566 | 0.352 |
| NFAT52    | 3.13E-29 | 0.482308442 | 0.752 | 0.547 |
| SMC61     | 4.50E-29 | 0.288236847 | 0.356 | 0.199 |
| FAM210A2  | 4.93E-29 | 0.334903084 | 0.368 | 0.206 |
| RAB7A2    | 1.04E-28 | 0.304344409 | 0.83  | 0.597 |
| TIMP12    | 1.34E-28 | 0.867261434 | 0.382 | 0.234 |
| SP1101    | 1.36E-28 | 0.326373149 | 0.688 | 0.459 |
| MYL12B2   | 1.57E-28 | 0.270202907 | 0.887 | 0.703 |
| GADD45B3  | 2.02E-28 | 0.349642159 | 0.653 | 0.457 |
| ABTB22    | 7.59E-28 | 0.273508699 | 0.338 | 0.185 |
| LPXN1     | 1.05E-27 | 0.45396728  | 0.651 | 0.446 |
| ARL6IP53  | 1.10E-27 | 0.268290468 | 0.812 | 0.596 |
| LRRFIP12  | 1.79E-27 | 0.377198863 | 0.859 | 0.677 |
| COX4I11   | 2.29E-27 | 0.259501512 | 0.926 | 0.795 |
| INPP5A1   | 3.12E-27 | 0.278428542 | 0.418 | 0.245 |
| OSBPL102  | 3.47E-27 | 0.398222866 | 0.257 | 0.134 |
| NFATC13   | 4.30E-27 | 0.278561207 | 0.44  | 0.262 |
| EMP32     | 1.32E-25 | 0.335181357 | 0.699 | 0.487 |
| PIK3R52   | 1.38E-25 | 0.317255309 | 0.553 | 0.371 |
| SMG11     | 1.71E-25 | 0.283849853 | 0.687 | 0.465 |
| CORO72    | 4.43E-25 | 0.328005021 | 0.48  | 0.307 |
| MCL11     | 5.94E-25 | 0.25386     | 0.834 | 0.652 |

|           |          |             |       |       |
|-----------|----------|-------------|-------|-------|
| ANXA23    | 7.10E-25 | 0.406983528 | 0.56  | 0.398 |
| ZFAND2A2  | 2.00E-24 | 0.418511181 | 0.447 | 0.276 |
| SSBP22    | 5.17E-24 | 0.28937064  | 0.475 | 0.293 |
| FBXO342   | 5.85E-24 | 0.252573625 | 0.653 | 0.448 |
| HIVEP31   | 1.25E-23 | 0.276037418 | 0.336 | 0.191 |
| XYLT12    | 1.40E-23 | 0.362191471 | 0.588 | 0.409 |
| YWHAZ1    | 1.76E-23 | 0.268259569 | 0.951 | 0.818 |
| MAN1A12   | 2.03E-23 | 0.442356956 | 0.635 | 0.453 |
| HERPUD12  | 2.64E-23 | 0.543040636 | 0.854 | 0.709 |
| LRCH31    | 2.71E-23 | 0.319918862 | 0.495 | 0.322 |
| CD372     | 3.70E-23 | 0.50370228  | 0.841 | 0.66  |
| ATP2C12   | 6.25E-23 | 0.309373416 | 0.494 | 0.314 |
| S100A113  | 6.34E-23 | 0.526906154 | 0.717 | 0.595 |
| SLC44A13  | 1.47E-22 | 0.258849213 | 0.262 | 0.145 |
| ERICH1    | 1.51E-22 | 0.271217532 | 0.458 | 0.288 |
| DENND4A1  | 2.51E-22 | 0.31195556  | 0.862 | 0.687 |
| USP241    | 3.74E-22 | 0.274830784 | 0.49  | 0.317 |
| CD79B1    | 3.83E-22 | 0.448044631 | 0.321 | 0.202 |
| LY91      | 5.38E-22 | 0.40481708  | 0.383 | 0.244 |
| ISG152    | 5.75E-21 | 0.301489338 | 0.631 | 0.445 |
| JARID21   | 7.90E-21 | 0.316099864 | 0.76  | 0.585 |
| SETBP11   | 1.23E-20 | 0.280450307 | 0.331 | 0.2   |
| LARGE12   | 1.30E-20 | 0.382013171 | 0.27  | 0.157 |
| ITGB23    | 8.87E-20 | 0.31103349  | 0.527 | 0.367 |
| COMMD101  | 1.97E-19 | 0.300316418 | 0.568 | 0.386 |
| CFLAR2    | 7.77E-19 | 0.314628081 | 0.762 | 0.616 |
| ARHGAP102 | 3.07E-18 | 0.417470468 | 0.309 | 0.189 |
| ZFAND53   | 3.57E-18 | 0.292367888 | 0.684 | 0.489 |
| ALOX5AP1  | 1.28E-17 | 0.439398088 | 0.512 | 0.387 |
| MTSS13    | 2.99E-17 | 0.311472714 | 0.356 | 0.235 |
| S100A103  | 3.55E-17 | 0.687493393 | 0.72  | 0.602 |
| RANBP2    | 6.13E-17 | 0.515247303 | 0.743 | 0.582 |
| AKAP131   | 7.53E-17 | 0.281005348 | 0.952 | 0.866 |
| ITM2C2    | 7.79E-17 | 0.315042641 | 0.275 | 0.167 |
| HIPK22    | 3.44E-16 | 0.324446753 | 0.552 | 0.386 |
| TRAF12    | 2.27E-15 | 0.30902364  | 0.378 | 0.25  |
| PARP151   | 1.27E-14 | 0.290865981 | 0.386 | 0.267 |
| HIST1H1C1 | 2.70E-14 | 0.29030474  | 0.349 | 0.231 |
| S100A63   | 3.66E-13 | 0.338070246 | 0.736 | 0.635 |
| ZNF3311   | 1.09E-11 | 0.336415471 | 0.72  | 0.609 |
| BAG33     | 3.06E-09 | 0.315731729 | 0.351 | 0.261 |
| CD523     | 7.44E-08 | 0.38603302  | 0.727 | 0.671 |
| LDHA3     | 3.63E-07 | 0.293045972 | 0.695 | 0.588 |

|             |             |             |       |       |
|-------------|-------------|-------------|-------|-------|
| BIRC33      | 3.42E-05    | 0.477106918 | 0.654 | 0.544 |
| ARL4C3      | 5.87E-05    | 0.311263606 | 0.575 | 0.509 |
| ID22        | 7.21E-05    | 0.44444335  | 0.537 | 0.5   |
| INPP4A1     | 0.001260533 | 0.319337634 | 0.313 | 0.265 |
| BANK13      | 0           | 1.779838598 | 0.81  | 0.203 |
| ARHGAP243   | 0           | 1.747457408 | 0.734 | 0.207 |
| MS4A12      | 0           | 1.552084548 | 0.722 | 0.185 |
| BLK2        | 0           | 1.526648934 | 0.577 | 0.124 |
| LINC01781   | 0           | 1.390017393 | 0.33  | 0.039 |
| C12orf74    | 0           | 1.207971321 | 0.319 | 0.039 |
| TNFRSF13C2  | 5.20E-286   | 1.526009799 | 0.648 | 0.18  |
| CD79A3      | 1.31E-248   | 1.365017576 | 0.742 | 0.24  |
| TNFRSF13B   | 1.68E-246   | 1.204431362 | 0.394 | 0.079 |
| GNG74       | 5.26E-239   | 1.475763279 | 0.764 | 0.288 |
| EBF12       | 2.21E-234   | 1.427734042 | 0.64  | 0.189 |
| ADAM282     | 2.19E-216   | 1.498291658 | 0.675 | 0.247 |
| MEF2C4      | 3.55E-214   | 1.534507102 | 0.702 | 0.271 |
| SSPN1       | 1.28E-210   | 1.363541956 | 0.335 | 0.067 |
| AFF32       | 2.11E-209   | 1.192631416 | 0.737 | 0.257 |
| HLA-DRA4    | 1.21E-201   | 1.328118468 | 0.918 | 0.533 |
| OSBPL103    | 2.36E-196   | 1.425208074 | 0.467 | 0.13  |
| CD744       | 1.11E-188   | 1.264426317 | 0.946 | 0.717 |
| SWAP703     | 1.83E-178   | 1.339395904 | 0.603 | 0.235 |
| CD241       | 9.89E-161   | 1.010121949 | 0.363 | 0.093 |
| RALGPS23    | 2.12E-160   | 1.301091306 | 0.599 | 0.231 |
| CD373       | 1.74E-157   | 1.257916347 | 0.859 | 0.66  |
| LINC009261  | 3.30E-149   | 1.076537023 | 0.406 | 0.117 |
| HLA-DQA14   | 1.23E-143   | 1.030349552 | 0.8   | 0.408 |
| VPREB31     | 5.21E-134   | 0.994479146 | 0.393 | 0.117 |
| 13-Mar      | 4.02E-127   | 1.256085043 | 0.512 | 0.202 |
| HLA-DPB14   | 2.05E-125   | 0.983075397 | 0.87  | 0.593 |
| HLA-DRB54   | 2.53E-125   | 0.993374036 | 0.566 | 0.236 |
| LYN4        | 3.10E-121   | 0.858180065 | 0.741 | 0.364 |
| HLA-DQB14   | 5.37E-116   | 0.851673799 | 0.775 | 0.422 |
| AC120193.13 | 1.58E-114   | 1.290123136 | 0.481 | 0.19  |
| LARGE13     | 1.20E-111   | 1.087735292 | 0.43  | 0.154 |
| WDFY43      | 2.20E-111   | 0.996464326 | 0.451 | 0.176 |
| EEF1B23     | 6.62E-111   | 1.047169246 | 0.879 | 0.842 |
| PAX52       | 5.48E-109   | 0.925472887 | 0.374 | 0.122 |
| CD834       | 1.65E-108   | 1.206122031 | 0.755 | 0.434 |
| HLA-DQA24   | 1.12E-107   | 0.915215791 | 0.608 | 0.277 |
| EZR2        | 9.63E-107   | 0.978708588 | 0.905 | 0.807 |
| SNED11      | 3.97E-106   | 1.188688458 | 0.385 | 0.134 |

|             |           |             |       |       |
|-------------|-----------|-------------|-------|-------|
| SCIMP2      | 1.12E-104 | 0.911849244 | 0.3   | 0.092 |
| IRF84       | 1.41E-104 | 1.085531394 | 0.516 | 0.23  |
| HLA-DRB14   | 2.49E-104 | 0.571997805 | 0.878 | 0.569 |
| LY864       | 1.41E-102 | 0.962348624 | 0.393 | 0.15  |
| COBLL13     | 2.48E-99  | 0.913501071 | 0.412 | 0.156 |
| HLA-DPA14   | 1.72E-96  | 0.674459755 | 0.844 | 0.573 |
| LINC023971  | 8.69E-96  | 0.861215819 | 0.292 | 0.089 |
| SMIM143     | 2.55E-95  | 1.066617795 | 0.445 | 0.195 |
| LY92        | 8.17E-95  | 1.057083726 | 0.523 | 0.241 |
| ZFAS12      | 3.74E-94  | 0.926401366 | 0.852 | 0.752 |
| CHPT12      | 2.07E-92  | 0.888569279 | 0.507 | 0.234 |
| PLEKHG12    | 2.69E-89  | 0.886554197 | 0.548 | 0.251 |
| EEF1A14     | 4.28E-89  | 0.681114127 | 0.961 | 0.958 |
| IFT572      | 1.06E-85  | 0.976409879 | 0.465 | 0.219 |
| PDLIM12     | 2.10E-85  | 0.741449435 | 0.331 | 0.12  |
| JADE32      | 7.65E-85  | 0.840232812 | 0.333 | 0.118 |
| EEF1G3      | 1.52E-83  | 0.81425481  | 0.884 | 0.843 |
| LAPTM54     | 5.81E-82  | 0.797483124 | 0.866 | 0.703 |
| FAM49A4     | 8.41E-82  | 1.016129075 | 0.539 | 0.274 |
| FAU3        | 1.03E-80  | 0.735131389 | 0.915 | 0.916 |
| AC119396.11 | 7.39E-80  | 0.981557903 | 0.318 | 0.116 |
| ST6GAL12    | 1.23E-79  | 0.870063163 | 0.633 | 0.36  |
| POU2F22     | 9.31E-79  | 0.957684524 | 0.506 | 0.263 |
| MGAT51      | 1.50E-75  | 0.890713698 | 0.725 | 0.487 |
| SETBP12     | 2.30E-75  | 0.942361089 | 0.434 | 0.198 |
| SNX23       | 2.38E-75  | 0.963646325 | 0.623 | 0.411 |
| GRASP4      | 3.21E-75  | 1.09102622  | 0.477 | 0.235 |
| HIPK23      | 2.15E-74  | 1.645943077 | 0.574 | 0.386 |
| PKIG2       | 9.80E-71  | 0.772181516 | 0.313 | 0.121 |
| TRIO5       | 7.48E-70  | 0.922492189 | 0.52  | 0.281 |
| INPP5A2     | 2.93E-69  | 0.906259792 | 0.478 | 0.244 |
| TLE11       | 1.10E-68  | 0.839349285 | 0.396 | 0.176 |
| P2RX51      | 7.76E-68  | 0.97099967  | 0.333 | 0.141 |
| CARMIL12    | 4.43E-65  | 0.960473995 | 0.386 | 0.176 |
| WEE1        | 5.20E-65  | 0.776175238 | 0.254 | 0.091 |
| GAS53       | 2.53E-64  | 0.810916899 | 0.782 | 0.684 |
| SEL1L33     | 3.80E-64  | 1.041699322 | 0.529 | 0.312 |
| CD551       | 4.98E-64  | 0.653465269 | 0.746 | 0.573 |
| KYNU3       | 2.22E-63  | 0.675866657 | 0.412 | 0.186 |
| ANKRD441    | 7.07E-63  | 0.751078243 | 0.831 | 0.73  |
| NIBAN31     | 4.51E-62  | 0.615420857 | 0.25  | 0.088 |
| FCRL11      | 1.92E-60  | 0.649131846 | 0.318 | 0.125 |
| POU2AF12    | 2.34E-60  | 0.763436583 | 0.277 | 0.107 |

|           |          |             |       |       |
|-----------|----------|-------------|-------|-------|
| HLA-DMA4  | 3.39E-60 | 0.745071233 | 0.595 | 0.361 |
| ORAI22    | 1.24E-58 | 0.787553189 | 0.407 | 0.208 |
| CD79B2    | 2.40E-58 | 0.795909269 | 0.401 | 0.2   |
| UBA523    | 2.66E-58 | 0.610256669 | 0.898 | 0.9   |
| BCAS41    | 3.23E-58 | 0.69681481  | 0.339 | 0.151 |
| SIPA1L14  | 8.00E-57 | 0.661854441 | 0.823 | 0.678 |
| NCOA32    | 1.90E-56 | 1.012036584 | 0.702 | 0.546 |
| PRDM22    | 1.32E-55 | 0.820800498 | 0.757 | 0.646 |
| MICAL32   | 1.69E-55 | 0.752979287 | 0.373 | 0.181 |
| C12orf421 | 3.46E-55 | 0.730442452 | 0.317 | 0.134 |
| BCL11A2   | 1.95E-54 | 0.696979804 | 0.369 | 0.171 |
| BASP13    | 3.82E-54 | 0.479199219 | 0.523 | 0.29  |
| PLCG23    | 9.10E-54 | 0.68556926  | 0.525 | 0.303 |
| DENND5B3  | 1.91E-53 | 0.692535308 | 0.291 | 0.123 |
| CDK144    | 2.45E-53 | 0.775770551 | 0.538 | 0.318 |
| MGMT2     | 5.43E-53 | 0.98413328  | 0.498 | 0.323 |
| MARCKS3   | 6.20E-53 | 0.68898367  | 0.373 | 0.178 |
| TPT12     | 6.60E-53 | 0.455346334 | 0.947 | 0.961 |
| NACA3     | 1.86E-52 | 0.624921702 | 0.88  | 0.895 |
| PFDN53    | 1.34E-50 | 0.665649777 | 0.856 | 0.837 |
| DRAM23    | 1.55E-49 | 0.728808427 | 0.4   | 0.225 |
| BACH21    | 9.39E-48 | 0.483687334 | 0.73  | 0.502 |
| BTG13     | 3.10E-47 | 0.571693949 | 0.946 | 0.918 |
| TCF43     | 1.53E-46 | 0.660591316 | 0.474 | 0.265 |
| NOP532    | 1.25E-45 | 0.70192832  | 0.765 | 0.708 |
| EIF13     | 1.52E-45 | 0.50322628  | 0.939 | 0.942 |
| TFEB1     | 9.07E-45 | 0.624657561 | 0.27  | 0.123 |
| ANKRD13A2 | 1.06E-44 | 0.727226897 | 0.415 | 0.242 |
| USP6NL3   | 7.42E-44 | 0.695274631 | 0.283 | 0.132 |
| SLC25A63  | 1.31E-43 | 0.668580287 | 0.762 | 0.707 |
| TSC22D32  | 4.37E-43 | 0.576793341 | 0.87  | 0.839 |
| SMAP22    | 1.09E-42 | 0.497111666 | 0.901 | 0.849 |
| RACK13    | 2.37E-42 | 0.571513856 | 0.888 | 0.893 |
| HLA-DMB4  | 3.79E-42 | 0.665460311 | 0.425 | 0.239 |
| PRKCB1    | 5.72E-42 | 0.752120187 | 0.708 | 0.591 |
| TOMM73    | 2.03E-41 | 0.670510057 | 0.789 | 0.763 |
| EEF22     | 8.40E-41 | 0.579766062 | 0.793 | 0.742 |
| UVRAG2    | 9.49E-41 | 0.789282378 | 0.567 | 0.415 |
| CCDC504   | 1.39E-40 | 0.680448188 | 0.412 | 0.249 |
| CXCR43    | 2.30E-40 | 0.598809324 | 0.881 | 0.817 |
| RCSD11    | 6.58E-40 | 0.869075108 | 0.523 | 0.367 |
| BMP2K4    | 1.19E-39 | 0.803358118 | 0.374 | 0.217 |
| IL13RA14  | 1.51E-39 | 0.69251746  | 0.271 | 0.132 |

|           |          |             |       |       |
|-----------|----------|-------------|-------|-------|
| CD404     | 1.67E-38 | 0.640661762 | 0.279 | 0.138 |
| PTMA2     | 1.17E-37 | 0.414450401 | 0.962 | 0.95  |
| SAMD4A2   | 1.79E-37 | 0.629304782 | 0.284 | 0.138 |
| KLF22     | 6.29E-37 | 0.666300082 | 0.669 | 0.494 |
| MAP4K43   | 7.30E-37 | 0.60035706  | 0.691 | 0.548 |
| AP1S32    | 9.22E-36 | 0.659007427 | 0.254 | 0.122 |
| INPP5D1   | 1.19E-35 | 0.676244155 | 0.643 | 0.496 |
| FCMR1     | 1.63E-35 | 0.594318804 | 0.465 | 0.296 |
| UST4      | 3.45E-35 | 0.62921847  | 0.465 | 0.294 |
| UBE2E24   | 4.57E-35 | 0.717001713 | 0.425 | 0.254 |
| CHCHD103  | 7.19E-35 | 0.691732587 | 0.506 | 0.374 |
| TAF4B1    | 1.50E-34 | 0.791107    | 0.365 | 0.212 |
| WASHC41   | 2.39E-34 | 0.661416731 | 0.465 | 0.324 |
| SESN33    | 1.88E-33 | 0.447705976 | 0.556 | 0.376 |
| CCSER13   | 2.18E-33 | 0.761731009 | 0.322 | 0.172 |
| CD222     | 2.99E-33 | 0.587475886 | 0.252 | 0.12  |
| PDE7A1    | 4.35E-33 | 0.571541762 | 0.725 | 0.596 |
| SNX84     | 4.74E-32 | 0.711076024 | 0.357 | 0.214 |
| SFMBT12   | 1.28E-31 | 0.764756002 | 0.468 | 0.319 |
| MALAT12   | 4.75E-31 | 0.292566673 | 0.996 | 0.987 |
| GSAP3     | 5.76E-31 | 0.640808838 | 0.295 | 0.164 |
| TMEM2431  | 5.96E-31 | 0.650637335 | 0.516 | 0.386 |
| PTK22     | 5.15E-30 | 0.649967114 | 0.266 | 0.139 |
| TMEM1312  | 6.27E-30 | 0.695468437 | 0.542 | 0.423 |
| HERPUD13  | 7.18E-30 | 0.666949917 | 0.77  | 0.711 |
| RNASET25  | 4.37E-29 | 0.516990349 | 0.66  | 0.555 |
| TRAK13    | 5.70E-29 | 0.697773963 | 0.441 | 0.307 |
| PHF201    | 6.32E-29 | 0.602606446 | 0.671 | 0.593 |
| TXNIP4    | 8.14E-29 | 0.484167261 | 0.804 | 0.723 |
| ARHGEF181 | 9.40E-29 | 0.660116153 | 0.386 | 0.252 |
| GRK34     | 1.58E-28 | 0.56670842  | 0.319 | 0.188 |
| NIN2      | 1.85E-28 | 0.829263016 | 0.485 | 0.362 |
| MARCKSL13 | 2.87E-28 | 0.809988434 | 0.403 | 0.267 |
| TP53INP12 | 1.24E-27 | 0.651567681 | 0.418 | 0.283 |
| ATP2B12   | 1.37E-27 | 0.468885054 | 0.744 | 0.648 |
| CD524     | 2.00E-27 | 0.569712962 | 0.777 | 0.67  |
| BTF32     | 2.28E-27 | 0.436938268 | 0.818 | 0.804 |
| DENND4A2  | 2.37E-27 | 0.598978298 | 0.761 | 0.69  |
| SSH21     | 2.98E-27 | 0.466545343 | 0.751 | 0.663 |
| LTB5      | 3.27E-27 | 0.510281418 | 0.606 | 0.443 |
| ZBTB202   | 4.47E-27 | 0.509660471 | 0.777 | 0.718 |
| EIF1AY1   | 7.06E-27 | 0.668845761 | 0.336 | 0.206 |
| RGS193    | 2.57E-26 | 0.557963756 | 0.336 | 0.214 |



|             |          |             |       |       |
|-------------|----------|-------------|-------|-------|
| YWHAZ2      | 3.61E-26 | 0.43742901  | 0.835 | 0.821 |
| NFKBID4     | 3.72E-26 | 0.812458056 | 0.346 | 0.224 |
| SLC44A21    | 4.44E-26 | 0.596316164 | 0.327 | 0.203 |
| SYPL11      | 2.83E-25 | 0.588457587 | 0.354 | 0.23  |
| CCR73       | 2.34E-24 | 0.488747023 | 0.414 | 0.268 |
| MEF2A3      | 3.20E-24 | 0.544605006 | 0.541 | 0.415 |
| EHMT12      | 5.42E-24 | 0.692038946 | 0.566 | 0.477 |
| DAPP12      | 6.41E-24 | 0.641186468 | 0.403 | 0.287 |
| ZHX22       | 6.92E-24 | 0.55833317  | 0.695 | 0.603 |
| PABPC13     | 7.51E-24 | 0.320126613 | 0.88  | 0.85  |
| SKIL1       | 7.89E-24 | 0.639230937 | 0.64  | 0.562 |
| OAZ13       | 1.02E-23 | 0.410099191 | 0.885 | 0.864 |
| PARVB4      | 1.93E-23 | 0.605176847 | 0.364 | 0.248 |
| SNHG293     | 2.18E-23 | 0.525949501 | 0.701 | 0.672 |
| SMARCB11    | 3.25E-23 | 0.57712162  | 0.308 | 0.198 |
| TCOF13      | 8.32E-23 | 0.627345173 | 0.295 | 0.185 |
| FCHSD24     | 1.04E-22 | 0.513464393 | 0.549 | 0.425 |
| MAPK8IP31   | 1.62E-22 | 0.580626696 | 0.265 | 0.159 |
| SMDT13      | 2.13E-22 | 0.539418559 | 0.583 | 0.508 |
| CMTM64      | 4.26E-22 | 0.561430124 | 0.536 | 0.442 |
| STRBP2      | 5.43E-22 | 0.542891376 | 0.405 | 0.278 |
| REL3        | 6.33E-22 | 0.472368366 | 0.769 | 0.665 |
| KMT2E1      | 8.50E-22 | 0.417714432 | 0.788 | 0.775 |
| CTSH3       | 1.58E-21 | 0.436629929 | 0.358 | 0.23  |
| AP000787.13 | 1.77E-21 | 0.454348773 | 0.387 | 0.257 |
| RHBDF24     | 1.82E-21 | 0.578121073 | 0.315 | 0.208 |
| RAB11FIP13  | 2.08E-21 | 0.445933776 | 0.609 | 0.496 |
| FARP22      | 2.85E-21 | 0.628733311 | 0.316 | 0.208 |
| RBM392      | 3.24E-21 | 0.327320268 | 0.863 | 0.868 |
| TBC1D51     | 3.92E-21 | 0.546036248 | 0.636 | 0.555 |
| MYO1D2      | 7.48E-21 | 0.585253444 | 0.326 | 0.212 |
| SNHG61      | 2.28E-20 | 0.449375459 | 0.673 | 0.619 |
| ARID5B2     | 2.32E-20 | 0.394172413 | 0.799 | 0.752 |
| RB12        | 2.57E-20 | 0.656532173 | 0.549 | 0.469 |
| TPD522      | 6.78E-20 | 0.757334902 | 0.414 | 0.304 |
| SKAP24      | 9.73E-20 | 0.505637886 | 0.403 | 0.293 |
| PIKFYVE3    | 1.23E-19 | 0.640290791 | 0.364 | 0.26  |
| NPM11       | 2.76E-19 | 0.350764572 | 0.835 | 0.85  |
| RUBCNL1     | 4.88E-19 | 0.340519166 | 0.265 | 0.154 |
| CD482       | 5.80E-19 | 0.434902334 | 0.673 | 0.601 |
| LIMD22      | 8.70E-19 | 0.501642622 | 0.516 | 0.416 |
| ATP2A31     | 9.32E-19 | 0.530377535 | 0.331 | 0.229 |
| PRDM41      | 1.40E-18 | 0.4927379   | 0.254 | 0.158 |

|          |          |             |       |       |
|----------|----------|-------------|-------|-------|
| MTSS14   | 1.60E-18 | 0.619420054 | 0.345 | 0.235 |
| KLHL51   | 1.68E-18 | 0.529727725 | 0.413 | 0.306 |
| GRK51    | 2.86E-18 | 0.463853481 | 0.488 | 0.372 |
| RAB11A2  | 3.48E-18 | 0.545668217 | 0.66  | 0.615 |
| SP1001   | 3.81E-18 | 0.42637797  | 0.745 | 0.715 |
| ZDHHC141 | 3.82E-18 | 0.602435068 | 0.3   | 0.198 |
| UPF22    | 9.13E-18 | 0.619094989 | 0.418 | 0.327 |
| LGMN3    | 1.16E-17 | 0.406027485 | 0.269 | 0.168 |
| PARP152  | 1.26E-17 | 0.462654388 | 0.379 | 0.267 |
| SYK4     | 1.49E-17 | 0.585793026 | 0.285 | 0.189 |
| IMMP2L2  | 1.92E-17 | 0.596280552 | 0.417 | 0.311 |
| UTY2     | 2.13E-17 | 0.397164905 | 0.472 | 0.355 |
| LSM73    | 2.26E-17 | 0.582406267 | 0.518 | 0.455 |
| ARRDC21  | 2.90E-17 | 0.563345328 | 0.306 | 0.211 |
| MYCBP22  | 3.02E-17 | 0.466912171 | 0.692 | 0.651 |
| CCNI2    | 4.73E-17 | 0.384163839 | 0.757 | 0.736 |
| SNHG82   | 7.65E-17 | 0.556693549 | 0.525 | 0.453 |
| SINHCAF2 | 1.11E-16 | 0.522814706 | 0.377 | 0.287 |
| EEF1D3   | 1.37E-16 | 0.391817955 | 0.859 | 0.865 |
| ARPC35   | 1.42E-16 | 0.330897223 | 0.8   | 0.774 |
| LAT24    | 1.67E-16 | 0.475072326 | 0.268 | 0.176 |
| PDE4D1   | 2.17E-16 | 1.079571323 | 0.541 | 0.52  |
| TNRC6B2  | 2.50E-16 | 0.428186378 | 0.742 | 0.702 |
| TMEM1561 | 3.87E-16 | 0.516288547 | 0.401 | 0.296 |
| UBE2I1   | 5.42E-16 | 0.45358759  | 0.494 | 0.429 |
| DAAM1    | 7.19E-16 | 0.535400373 | 0.289 | 0.196 |
| TBXAS12  | 1.11E-15 | 0.815838189 | 0.284 | 0.196 |
| USP341   | 1.18E-15 | 0.450795756 | 0.7   | 0.668 |
| EIF3E3   | 1.21E-15 | 0.373747231 | 0.695 | 0.683 |
| EIF4A23  | 1.65E-15 | 0.370168351 | 0.701 | 0.682 |
| RFX33    | 2.88E-15 | 0.543745287 | 0.525 | 0.444 |
| ELMO11   | 4.08E-15 | 0.33364553  | 0.754 | 0.699 |
| CD531    | 9.14E-15 | 0.352697491 | 0.739 | 0.711 |
| CAMK1D2  | 1.23E-14 | 0.285239448 | 0.665 | 0.571 |
| NUP881   | 1.63E-14 | 0.437701962 | 0.286 | 0.197 |
| THEMIS25 | 3.03E-14 | 0.486652182 | 0.27  | 0.187 |
| NDUFAF62 | 3.18E-14 | 0.45035451  | 0.404 | 0.314 |
| LMO4     | 3.79E-14 | 0.593022259 | 0.295 | 0.213 |
| SNHG5    | 3.82E-14 | 0.474231548 | 0.682 | 0.649 |
| RAPGEF15 | 4.54E-14 | 0.453404628 | 0.674 | 0.607 |
| TUT41    | 4.98E-14 | 0.488769231 | 0.527 | 0.466 |
| OTUD14   | 6.03E-14 | 0.526146185 | 0.303 | 0.22  |
| ATF4     | 8.15E-14 | 0.49506804  | 0.536 | 0.496 |

|             |          |             |       |       |
|-------------|----------|-------------|-------|-------|
| MIDN1       | 9.82E-14 | 0.552568647 | 0.378 | 0.301 |
| TMEM1542    | 1.03E-13 | 0.410051666 | 0.31  | 0.221 |
| CD82        | 1.51E-13 | 0.442301953 | 0.327 | 0.244 |
| BICD12      | 1.87E-13 | 0.515672597 | 0.324 | 0.236 |
| RFX1        | 3.40E-13 | 0.423175716 | 0.25  | 0.171 |
| CIRBP3      | 4.12E-13 | 0.311755286 | 0.725 | 0.714 |
| ATF7IP22    | 4.23E-13 | 0.480509367 | 0.399 | 0.312 |
| THUMPD3-AS1 | 4.59E-13 | 0.573444126 | 0.396 | 0.328 |
| CHD71       | 5.01E-13 | 0.454363772 | 0.304 | 0.217 |
| ITPR11      | 5.94E-13 | 0.54368507  | 0.536 | 0.483 |
| NAP1L12     | 6.69E-13 | 0.394194578 | 0.698 | 0.683 |
| VASP4       | 7.11E-13 | 0.346012248 | 0.415 | 0.336 |
| TCEA12      | 7.15E-13 | 0.506059319 | 0.533 | 0.494 |
| RERE1       | 7.85E-13 | 0.392954775 | 0.581 | 0.508 |
| SEPTIN93    | 8.85E-13 | 0.381891211 | 0.513 | 0.452 |
| HIST1H4C2   | 1.08E-12 | 0.514444432 | 0.46  | 0.392 |
| CCND32      | 1.49E-12 | 0.331655242 | 0.63  | 0.549 |
| ZFP36L23    | 1.66E-12 | 0.263200911 | 0.832 | 0.818 |
| RUBCN2      | 1.67E-12 | 0.461957583 | 0.345 | 0.263 |
| ITSN22      | 1.74E-12 | 0.475095516 | 0.588 | 0.554 |
| TAF1D1      | 1.90E-12 | 0.433959198 | 0.603 | 0.587 |
| SERP13      | 2.04E-12 | 0.328127431 | 0.697 | 0.681 |
| RASGRP21    | 2.14E-12 | 0.419072874 | 0.272 | 0.19  |
| DENND33     | 2.20E-12 | 0.434177102 | 0.254 | 0.178 |
| FAM102A1    | 2.44E-12 | 0.427450622 | 0.399 | 0.314 |
| SH2B34      | 2.44E-12 | 0.504173577 | 0.303 | 0.224 |
| COX4I12     | 2.44E-12 | 0.307940887 | 0.795 | 0.798 |
| GNA124      | 2.52E-12 | 0.370111185 | 0.377 | 0.283 |
| RASGEF1B4   | 2.99E-12 | 0.435290299 | 0.465 | 0.375 |
| CALM22      | 3.30E-12 | 0.344871893 | 0.779 | 0.779 |
| COMMD62     | 3.37E-12 | 0.390397545 | 0.651 | 0.642 |
| RILPL24     | 3.49E-12 | 0.466155321 | 0.509 | 0.444 |
| MOB3A3      | 4.74E-12 | 0.557817212 | 0.403 | 0.342 |
| FUS1        | 5.25E-12 | 0.454409401 | 0.721 | 0.732 |
| SRSF32      | 5.64E-12 | 0.33920563  | 0.765 | 0.76  |
| MOB1A4      | 6.09E-12 | 0.36996955  | 0.531 | 0.48  |
| RAB302      | 8.46E-12 | 0.497174524 | 0.335 | 0.251 |
| STK17A3     | 8.67E-12 | 0.31681159  | 0.696 | 0.649 |
| ARID1B1     | 1.01E-11 | 0.342538138 | 0.723 | 0.695 |
| SP1102      | 1.06E-11 | 0.440423091 | 0.527 | 0.463 |
| SNHG72      | 1.30E-11 | 0.463087586 | 0.421 | 0.347 |
| SNHG321     | 1.40E-11 | 0.419502302 | 0.43  | 0.363 |
| UQCRH3      | 1.66E-11 | 0.427747695 | 0.651 | 0.645 |

|             |          |             |       |       |
|-------------|----------|-------------|-------|-------|
| ERP293      | 2.21E-11 | 0.373008628 | 0.56  | 0.528 |
| MIR29B2CHG1 | 2.29E-11 | 0.496085711 | 0.263 | 0.191 |
| AC092821.31 | 2.54E-11 | 0.501205377 | 0.351 | 0.276 |
| ZFP36L13    | 2.56E-11 | 0.576283709 | 0.546 | 0.501 |
| HSH2D2      | 3.61E-11 | 0.449913838 | 0.271 | 0.197 |
| ZFAND62     | 3.71E-11 | 0.457195395 | 0.536 | 0.501 |
| SREBF21     | 3.93E-11 | 0.437572431 | 0.392 | 0.317 |
| SIPA1L32    | 4.69E-11 | 0.475531637 | 0.357 | 0.281 |
| NR4A24      | 5.44E-11 | 0.596296321 | 0.573 | 0.518 |
| CRIP12      | 5.77E-11 | 0.463341267 | 0.736 | 0.712 |
| CNPY33      | 6.48E-11 | 0.438195189 | 0.318 | 0.255 |
| CCDC971     | 6.57E-11 | 0.447174287 | 0.353 | 0.282 |
| AP001011.12 | 7.03E-11 | 0.370734342 | 0.555 | 0.49  |
| SRRM2       | 7.52E-11 | 0.329237593 | 0.696 | 0.704 |
| USP81       | 9.45E-11 | 0.450989881 | 0.509 | 0.471 |
| SMC62       | 1.04E-10 | 0.41924932  | 0.273 | 0.201 |
| REV3L3      | 1.06E-10 | 0.454795553 | 0.535 | 0.488 |
| IDS2        | 1.14E-10 | 0.429811063 | 0.574 | 0.551 |
| UXT2        | 1.15E-10 | 0.425641808 | 0.562 | 0.534 |
| RBFOX22     | 1.20E-10 | 0.427181219 | 0.43  | 0.374 |
| VOPP12      | 1.41E-10 | 0.42711709  | 0.479 | 0.427 |
| SLC49A41    | 1.41E-10 | 0.453753572 | 0.297 | 0.222 |
| INTS61      | 1.67E-10 | 0.769853906 | 0.532 | 0.493 |
| TGFB12      | 1.94E-10 | 0.45331084  | 0.617 | 0.579 |
| KDM6B4      | 2.19E-10 | 0.490675015 | 0.387 | 0.319 |
| MIS18BP11   | 2.31E-10 | 0.509375321 | 0.384 | 0.319 |
| TRIR1       | 2.89E-10 | 0.335427726 | 0.646 | 0.629 |
| TRAF52      | 3.35E-10 | 0.366146802 | 0.345 | 0.271 |
| SYS11       | 3.40E-10 | 0.386100136 | 0.273 | 0.208 |
| DUSP11      | 5.35E-10 | 0.343142245 | 0.761 | 0.727 |
| SQSTM13     | 5.98E-10 | 0.45731968  | 0.708 | 0.69  |
| UBB3        | 6.07E-10 | 0.337091359 | 0.831 | 0.85  |
| SRGAP24     | 7.08E-10 | 0.416940163 | 0.338 | 0.272 |
| BACH13      | 7.45E-10 | 0.339541629 | 0.604 | 0.555 |
| HNRNPA12    | 8.25E-10 | 0.299836941 | 0.785 | 0.798 |
| EIF51       | 8.60E-10 | 0.30536672  | 0.716 | 0.726 |
| C7orf501    | 9.86E-10 | 0.427381317 | 0.347 | 0.288 |
| STX73       | 1.07E-09 | 0.501774214 | 0.31  | 0.247 |
| EIF2S32     | 1.29E-09 | 0.41505445  | 0.421 | 0.375 |
| ERC12       | 1.33E-09 | 0.434565978 | 0.466 | 0.413 |
| NRF11       | 1.49E-09 | 0.452460367 | 0.39  | 0.329 |
| SNX251      | 1.51E-09 | 0.359904728 | 0.388 | 0.32  |
| RABEP11     | 1.97E-09 | 0.399113874 | 0.435 | 0.384 |

|              |          |             |       |       |
|--------------|----------|-------------|-------|-------|
| H3F3B2       | 2.34E-09 | 0.258271117 | 0.923 | 0.925 |
| IRAK22       | 2.44E-09 | 0.300093195 | 0.258 | 0.185 |
| RBM381       | 2.48E-09 | 0.486992394 | 0.403 | 0.341 |
| MKKNK22      | 2.77E-09 | 0.445688815 | 0.333 | 0.275 |
| LPIN11       | 2.84E-09 | 0.547429595 | 0.411 | 0.363 |
| FNBP11       | 3.02E-09 | 0.297542827 | 0.783 | 0.793 |
| EIF3F1       | 4.13E-09 | 0.336341468 | 0.609 | 0.59  |
| TRIM381      | 4.50E-09 | 0.431522354 | 0.384 | 0.333 |
| SNX293       | 6.42E-09 | 0.448778578 | 0.428 | 0.364 |
| MICU21       | 8.92E-09 | 0.513209478 | 0.418 | 0.369 |
| SMG12        | 1.07E-08 | 0.46475404  | 0.488 | 0.469 |
| OOEP2        | 1.19E-08 | 0.354226957 | 0.34  | 0.286 |
| FAM13B1      | 1.52E-08 | 0.409175102 | 0.455 | 0.411 |
| CNTRL1       | 1.54E-08 | 0.411602233 | 0.419 | 0.367 |
| NASP1        | 1.79E-08 | 0.397165128 | 0.576 | 0.552 |
| SNU132       | 2.23E-08 | 0.418009529 | 0.601 | 0.604 |
| TUBA1A1      | 2.25E-08 | 0.405637995 | 0.548 | 0.5   |
| IER53        | 2.61E-08 | 0.618198047 | 0.473 | 0.428 |
| YPEL51       | 2.91E-08 | 0.263593978 | 0.692 | 0.679 |
| EPB41L4A-AS1 | 3.72E-08 | 0.408281933 | 0.305 | 0.25  |
| AFTPH2       | 4.17E-08 | 0.388636725 | 0.401 | 0.357 |
| ADGRE52      | 4.24E-08 | 0.463801586 | 0.577 | 0.564 |
| UBE2N1       | 4.97E-08 | 0.405363453 | 0.452 | 0.426 |
| NR1H21       | 6.81E-08 | 0.357753238 | 0.302 | 0.249 |
| NCF12        | 6.86E-08 | 0.387772151 | 0.269 | 0.213 |
| RAB3GAP11    | 7.07E-08 | 0.358203141 | 0.439 | 0.388 |
| ANKRD371     | 8.45E-08 | 0.465891217 | 0.308 | 0.252 |
| RIPOR21      | 1.17E-07 | 0.340085203 | 0.545 | 0.488 |
| RBM34        | 1.17E-07 | 0.291344259 | 0.58  | 0.566 |
| RPA21        | 1.23E-07 | 0.367511047 | 0.269 | 0.216 |
| Mar-81       | 1.35E-07 | 0.470726371 | 0.278 | 0.221 |
| SERTAD12     | 1.47E-07 | 0.5483489   | 0.373 | 0.328 |
| RAD51B1      | 1.99E-07 | 0.398661067 | 0.425 | 0.373 |
| PWP11        | 2.00E-07 | 0.348468446 | 0.278 | 0.225 |
| ABHD15-AS11  | 2.16E-07 | 0.363244349 | 0.256 | 0.195 |
| KLHL64       | 2.24E-07 | 0.527466479 | 0.32  | 0.273 |
| TUBA1B4      | 2.41E-07 | 0.332088939 | 0.596 | 0.567 |
| COX7C1       | 2.44E-07 | 0.261959534 | 0.776 | 0.789 |
| USP9Y2       | 2.46E-07 | 0.28118957  | 0.335 | 0.267 |
| MTFR11       | 2.62E-07 | 0.330598124 | 0.269 | 0.213 |
| SF12         | 2.72E-07 | 0.283651438 | 0.604 | 0.599 |
| ZCCHC101     | 3.32E-07 | 0.370653359 | 0.326 | 0.28  |
| EIF3H2       | 4.86E-07 | 0.27993505  | 0.67  | 0.681 |

|             |          |             |       |       |
|-------------|----------|-------------|-------|-------|
| TOMM201     | 6.67E-07 | 0.304027799 | 0.577 | 0.579 |
| RBM61       | 7.16E-07 | 0.411948389 | 0.518 | 0.51  |
| SYNGR24     | 7.77E-07 | 0.424012405 | 0.316 | 0.271 |
| SNHG121     | 8.42E-07 | 0.517647777 | 0.302 | 0.256 |
| ODC12       | 9.24E-07 | 0.480016899 | 0.458 | 0.43  |
| TAGLN22     | 9.68E-07 | 0.368906126 | 0.569 | 0.555 |
| PAN31       | 1.14E-06 | 0.323328767 | 0.556 | 0.539 |
| ATM2        | 1.19E-06 | 0.350664131 | 0.515 | 0.49  |
| RUFY11      | 1.39E-06 | 0.323257987 | 0.283 | 0.235 |
| SP1402      | 1.58E-06 | 0.339293047 | 0.508 | 0.471 |
| EIF1B2      | 1.68E-06 | 0.360834199 | 0.423 | 0.395 |
| ZNF5061     | 1.81E-06 | 0.30851746  | 0.27  | 0.218 |
| DDX212      | 1.86E-06 | 0.419439248 | 0.555 | 0.545 |
| BBX1        | 1.86E-06 | 0.321183582 | 0.547 | 0.523 |
| HMGN13      | 2.02E-06 | 0.271537725 | 0.602 | 0.6   |
| UBXN11      | 2.02E-06 | 0.329927528 | 0.534 | 0.529 |
| SAP182      | 2.59E-06 | 0.331408745 | 0.653 | 0.666 |
| KDM4C1      | 2.86E-06 | 0.360110827 | 0.529 | 0.518 |
| DANCR       | 3.15E-06 | 0.433303712 | 0.278 | 0.237 |
| PARP141     | 3.38E-06 | 0.480571895 | 0.431 | 0.413 |
| ALG131      | 3.69E-06 | 0.366117109 | 0.452 | 0.418 |
| OSER11      | 4.18E-06 | 0.369481012 | 0.379 | 0.349 |
| AC245297.32 | 4.52E-06 | 0.313210179 | 0.325 | 0.278 |
| RHOQ4       | 4.56E-06 | 0.284056825 | 0.284 | 0.233 |
| PLP23       | 5.04E-06 | 0.288861422 | 0.432 | 0.394 |
| CLIC43      | 5.14E-06 | 0.310375419 | 0.272 | 0.218 |
| RHBDD12     | 5.24E-06 | 0.310373531 | 0.292 | 0.243 |
| BRD21       | 5.49E-06 | 0.39007249  | 0.528 | 0.528 |
| TRIM441     | 5.51E-06 | 0.339974029 | 0.329 | 0.289 |
| CEP1704     | 5.75E-06 | 0.400936661 | 0.297 | 0.251 |
| DGKD1       | 5.76E-06 | 0.451090257 | 0.303 | 0.256 |
| MBD41       | 5.77E-06 | 0.478481378 | 0.266 | 0.225 |
| TAF72       | 5.89E-06 | 0.345282119 | 0.473 | 0.461 |
| SPOP1       | 6.75E-06 | 0.402692369 | 0.322 | 0.287 |
| NSA22       | 7.43E-06 | 0.329606983 | 0.516 | 0.52  |
| SPIDR1      | 9.88E-06 | 0.315035716 | 0.504 | 0.471 |
| PRMT11      | 1.00E-05 | 0.338237553 | 0.293 | 0.256 |
| BPTF1       | 1.04E-05 | 0.301942642 | 0.628 | 0.634 |
| IFNGR24     | 1.36E-05 | 0.328385477 | 0.265 | 0.22  |
| PVT12       | 1.61E-05 | 0.395809006 | 0.431 | 0.398 |
| RBM23       | 1.71E-05 | 0.330324633 | 0.417 | 0.396 |
| IGHM2       | 1.77E-05 | 0.624284336 | 0.264 | 0.214 |
| SRPK21      | 1.83E-05 | 0.340804444 | 0.565 | 0.564 |

|             |             |             |       |       |
|-------------|-------------|-------------|-------|-------|
| SFPQ        | 2.03E-05    | 0.298159949 | 0.662 | 0.692 |
| AP1B12      | 2.08E-05    | 0.394446454 | 0.282 | 0.244 |
| CHD92       | 2.79E-05    | 0.399469826 | 0.344 | 0.317 |
| POLD43      | 3.15E-05    | 0.419047846 | 0.385 | 0.372 |
| MECP22      | 4.06E-05    | 0.321564469 | 0.478 | 0.46  |
| DDIT31      | 4.51E-05    | 0.374730058 | 0.264 | 0.225 |
| ZBTB441     | 4.54E-05    | 0.275611928 | 0.273 | 0.232 |
| STAG12      | 4.66E-05    | 0.262843895 | 0.684 | 0.709 |
| CYSTM12     | 4.71E-05    | 0.307439706 | 0.365 | 0.334 |
| SERTAD2     | 4.88E-05    | 0.318978916 | 0.254 | 0.213 |
| CORO1A2     | 5.23E-05    | 0.268488239 | 0.626 | 0.62  |
| PCF111      | 6.22E-05    | 0.37880422  | 0.357 | 0.338 |
| PCBP21      | 6.22E-05    | 0.262380919 | 0.546 | 0.544 |
| Mar-61      | 6.66E-05    | 0.266537354 | 0.499 | 0.485 |
| RSRC2       | 6.69E-05    | 0.300412021 | 0.597 | 0.629 |
| ZCCHC71     | 6.84E-05    | 0.390730015 | 0.509 | 0.496 |
| IDI11       | 7.32E-05    | 0.397544436 | 0.511 | 0.5   |
| PATJ2       | 7.40E-05    | 0.275228017 | 0.265 | 0.22  |
| STIM21      | 7.54E-05    | 0.356723124 | 0.46  | 0.445 |
| GTF2H11     | 7.63E-05    | 0.372794195 | 0.282 | 0.249 |
| SHOC21      | 8.71E-05    | 0.320224657 | 0.381 | 0.363 |
| ATF7IP1     | 9.70E-05    | 0.331032003 | 0.606 | 0.618 |
| PPIG1       | 0.000101627 | 0.253432769 | 0.525 | 0.523 |
| CKS22       | 0.000112758 | 0.424605111 | 0.265 | 0.231 |
| TMEM131L1   | 0.000116137 | 0.298230961 | 0.428 | 0.391 |
| XKR61       | 0.000131567 | 0.372660492 | 0.304 | 0.27  |
| KDM3B       | 0.000141251 | 0.498787235 | 0.278 | 0.249 |
| COMMD102    | 0.000153815 | 0.323347239 | 0.413 | 0.389 |
| ARHGAP45    | 0.000155075 | 0.28479202  | 0.291 | 0.262 |
| RBM261      | 0.00017101  | 0.296355132 | 0.39  | 0.368 |
| EEA12       | 0.000181364 | 0.386412585 | 0.265 | 0.23  |
| MTPN3       | 0.000200065 | 0.307987527 | 0.493 | 0.496 |
| PHKB1       | 0.000200271 | 0.310907124 | 0.338 | 0.311 |
| WSB1        | 0.000211734 | 0.253588779 | 0.576 | 0.581 |
| FBL2        | 0.000232503 | 0.270415046 | 0.3   | 0.274 |
| RBM25       | 0.000237002 | 0.272422993 | 0.565 | 0.59  |
| ZNF24       | 0.00023968  | 0.294638171 | 0.27  | 0.239 |
| PARP12      | 0.000271425 | 0.287082808 | 0.376 | 0.356 |
| PALM2-AKAP2 | 0.000279478 | 0.27690602  | 0.252 | 0.213 |
| KLHL241     | 0.000289371 | 0.304361088 | 0.362 | 0.338 |
| ST131       | 0.00030323  | 0.286021055 | 0.507 | 0.507 |
| WAC1        | 0.000321292 | 0.280500582 | 0.603 | 0.628 |
| KLHL18      | 0.000364225 | 0.331902237 | 0.271 | 0.238 |

|          |             |             |       |       |
|----------|-------------|-------------|-------|-------|
| HDAC1    | 0.000364368 | 0.29294182  | 0.255 | 0.223 |
| SCAF81   | 0.000369534 | 0.251660447 | 0.418 | 0.399 |
| MTMR62   | 0.000396878 | 0.29453282  | 0.337 | 0.312 |
| MAP3K12  | 0.00040262  | 0.275448246 | 0.4   | 0.373 |
| TRAPPC81 | 0.000418161 | 0.316903619 | 0.278 | 0.248 |
| EIF4B2   | 0.000438173 | 0.261066498 | 0.518 | 0.534 |
| EIF3L3   | 0.00045493  | 0.296734922 | 0.398 | 0.389 |
| IL161    | 0.00051182  | 0.287299504 | 0.252 | 0.221 |
| TUBB4B2  | 0.000531944 | 0.567373519 | 0.504 | 0.511 |
| SYF21    | 0.000630038 | 0.288453573 | 0.495 | 0.505 |
| VTI1A    | 0.000809715 | 0.256747333 | 0.514 | 0.517 |
| ATP5MC21 | 0.0008146   | 0.263772477 | 0.678 | 0.707 |
| SRSF22   | 0.000846976 | 0.273444463 | 0.559 | 0.574 |
| NR1D21   | 0.000898249 | 0.264931937 | 0.333 | 0.305 |
| PHB22    | 0.00093772  | 0.265859953 | 0.323 | 0.303 |
| CDK131   | 0.000944102 | 0.293585141 | 0.515 | 0.508 |
| CD471    | 0.000955529 | 0.265847368 | 0.462 | 0.46  |
| SIRT11   | 0.001076391 | 0.29142111  | 0.3   | 0.272 |
| SNX34    | 0.001081256 | 0.26759825  | 0.467 | 0.462 |
| CSNK1D1  | 0.001099801 | 0.339940016 | 0.414 | 0.415 |
| SP140L1  | 0.001254852 | 0.293694959 | 0.357 | 0.343 |
| BANF11   | 0.001267286 | 0.265309967 | 0.329 | 0.314 |
| KDM4B1   | 0.00129802  | 0.408858286 | 0.353 | 0.339 |
| GNB51    | 0.001361916 | 0.263995137 | 0.263 | 0.232 |
| UBE2S3   | 0.001405953 | 0.597720321 | 0.468 | 0.479 |
| RNPS11   | 0.001657361 | 0.271558845 | 0.37  | 0.363 |
| DYNLL13  | 0.001869556 | 0.31231246  | 0.617 | 0.636 |
| CLASP21  | 0.001924143 | 0.296561982 | 0.43  | 0.429 |
| PTPN62   | 0.001977337 | 0.295073852 | 0.259 | 0.236 |
| WIPF21   | 0.002013069 | 0.28466743  | 0.275 | 0.252 |
| HPS53    | 0.00207148  | 0.260427605 | 0.25  | 0.226 |
| PIAS11   | 0.002116995 | 0.288929196 | 0.506 | 0.523 |
| NFATC14  | 0.002224397 | 0.391521061 | 0.29  | 0.266 |
| BOD1L11  | 0.002299923 | 0.260917867 | 0.464 | 0.473 |
| TMX41    | 0.002314243 | 0.303401219 | 0.286 | 0.264 |
| EPC22    | 0.002405117 | 0.264705873 | 0.439 | 0.442 |
| TTC171   | 0.00260767  | 0.255306679 | 0.4   | 0.39  |
| FAM133B1 | 0.002613487 | 0.264493863 | 0.502 | 0.52  |
| ATP5PO1  | 0.002922597 | 0.304845431 | 0.469 | 0.485 |
| DMXL12   | 0.003375058 | 0.340895032 | 0.332 | 0.314 |
| GDI25    | 0.003438918 | 0.291157888 | 0.432 | 0.431 |
| PPP3CA1  | 0.003450284 | 0.259270015 | 0.475 | 0.47  |
| SH3BP54  | 0.003726963 | 0.299903101 | 0.33  | 0.307 |



|            |             |             |       |       |
|------------|-------------|-------------|-------|-------|
| TMEM651    | 0.003770809 | 0.299874016 | 0.257 | 0.232 |
| RSL24D12   | 0.004824155 | 0.265282517 | 0.442 | 0.452 |
| CD2AP2     | 0.004915899 | 0.259694452 | 0.333 | 0.318 |
| KRT101     | 0.005203055 | 0.253730503 | 0.427 | 0.431 |
| LRIF11     | 0.005232959 | 0.250566791 | 0.262 | 0.237 |
| EIF3D2     | 0.005262088 | 0.256785678 | 0.466 | 0.475 |
| CD693      | 0.006541619 | 0.40490212  | 0.562 | 0.576 |
| TBC1D22A1  | 0.007066858 | 0.289011692 | 0.508 | 0.534 |
| P4HA12     | 0.008343782 | 0.360160976 | 0.318 | 0.309 |
| RNMT1      | 0.008496722 | 0.280613693 | 0.437 | 0.442 |
| BCL2L113   | 0.009272191 | 0.3043071   | 0.373 | 0.364 |
| IL1R21     | 0           | 4.791978728 | 0.587 | 0.123 |
| AQP91      | 0           | 4.621312305 | 0.7   | 0.049 |
| NAMPT2     | 0           | 4.56526149  | 0.954 | 0.537 |
| CXCL82     | 0           | 4.563856207 | 0.716 | 0.123 |
| ACSL12     | 0           | 4.295130173 | 0.743 | 0.235 |
| PLAUR2     | 0           | 4.218894705 | 0.789 | 0.144 |
| KCNJ15     | 0           | 3.994811972 | 0.442 | 0.02  |
| FGD42      | 0           | 3.909808511 | 0.61  | 0.127 |
| IRAK32     | 0           | 3.902200196 | 0.692 | 0.162 |
| CSF3R1     | 0           | 3.485754916 | 0.471 | 0.052 |
| SOD22      | 0           | 3.454435348 | 0.902 | 0.557 |
| DOCK42     | 0           | 3.322812417 | 0.663 | 0.151 |
| G0S23      | 0           | 3.276575035 | 0.493 | 0.098 |
| AC007271.1 | 0           | 3.232680877 | 0.282 | 0.019 |
| TREM12     | 0           | 3.09777757  | 0.417 | 0.064 |
| ADGRG3     | 0           | 3.079796962 | 0.343 | 0.012 |
| AC005050.3 | 0           | 3.009146771 | 0.278 | 0.017 |
| SLC11A12   | 0           | 2.935655108 | 0.417 | 0.076 |
| TNFAIP61   | 0           | 2.852148405 | 0.316 | 0.038 |
| NEAT12     | 0           | 2.677509282 | 0.941 | 0.825 |
| LIMK2      | 6.31E-308   | 3.681016281 | 0.517 | 0.127 |
| DENND5A1   | 4.35E-303   | 3.414832205 | 0.581 | 0.162 |
| LCP22      | 3.40E-295   | 3.840835047 | 0.723 | 0.315 |
| PLEK3      | 1.37E-284   | 3.572694778 | 0.595 | 0.185 |
| S100A81    | 3.10E-284   | 4.670857694 | 0.57  | 0.168 |
| RBM473     | 2.71E-280   | 2.957881645 | 0.599 | 0.18  |
| LUCAT11    | 3.64E-269   | 3.480554279 | 0.47  | 0.114 |
| LITAF2     | 2.28E-266   | 3.336350259 | 0.817 | 0.528 |
| RNF1491    | 6.40E-261   | 3.825353112 | 0.789 | 0.505 |
| IL1RAP1    | 2.14E-256   | 3.918783702 | 0.516 | 0.149 |
| ARHGAP261  | 2.62E-249   | 3.158049865 | 0.787 | 0.488 |
| BASP14     | 3.05E-248   | 3.501041546 | 0.669 | 0.287 |

|              |           |             |       |       |
|--------------|-----------|-------------|-------|-------|
| S100A93      | 4.95E-244 | 3.640204037 | 0.619 | 0.23  |
| BCL2A13      | 2.59E-241 | 3.088080196 | 0.622 | 0.24  |
| WDFY32       | 2.55E-235 | 3.207374988 | 0.351 | 0.069 |
| SLC25A371    | 8.66E-225 | 3.227670361 | 0.486 | 0.146 |
| PTGS21       | 1.01E-218 | 2.947817747 | 0.366 | 0.079 |
| AZIN1-AS11   | 7.74E-211 | 4.030415006 | 0.454 | 0.132 |
| CD552        | 1.54E-209 | 3.329685879 | 0.792 | 0.572 |
| FPR12        | 6.34E-207 | 2.658489356 | 0.358 | 0.08  |
| CPD          | 1.34E-206 | 3.591768401 | 0.567 | 0.224 |
| GK2          | 2.09E-201 | 3.229673704 | 0.616 | 0.272 |
| TMCC31       | 3.51E-194 | 3.189806725 | 0.369 | 0.091 |
| HCK3         | 4.61E-194 | 2.956741951 | 0.382 | 0.097 |
| SLC8A13      | 2.27E-193 | 2.901825926 | 0.419 | 0.113 |
| SAMSN13      | 4.25E-192 | 2.837514469 | 0.834 | 0.735 |
| AL078604.42  | 2.81E-183 | 3.116201682 | 0.472 | 0.153 |
| IL1B2        | 6.46E-183 | 2.308485129 | 0.419 | 0.11  |
| MXD12        | 1.87E-172 | 2.928908927 | 0.57  | 0.257 |
| ETS23        | 1.03E-161 | 2.486461149 | 0.44  | 0.148 |
| PLXDC23      | 7.06E-157 | 2.396888645 | 0.407 | 0.122 |
| ADAMTSL4-AS1 | 3.51E-152 | 3.188636822 | 0.604 | 0.336 |
| TLR22        | 1.79E-151 | 2.421580031 | 0.328 | 0.086 |
| C5AR12       | 1.50E-150 | 2.389922893 | 0.342 | 0.092 |
| NCF22        | 3.08E-150 | 2.563563216 | 0.349 | 0.1   |
| IVNS1ABP1    | 1.07E-148 | 3.0604404   | 0.664 | 0.454 |
| ITGAX2       | 8.68E-148 | 2.60463479  | 0.365 | 0.109 |
| PDE4B2       | 1.37E-143 | 3.327965745 | 0.748 | 0.64  |
| SRGN4        | 3.51E-137 | 1.461941728 | 0.902 | 0.888 |
| DOCK51       | 4.51E-135 | 2.774806216 | 0.355 | 0.111 |
| MCTP13       | 1.15E-129 | 2.689996374 | 0.376 | 0.123 |
| IGF1R        | 9.23E-116 | 2.849681595 | 0.314 | 0.099 |
| FNDC3B3      | 1.59E-114 | 2.311340468 | 0.622 | 0.399 |
| PELI12       | 2.88E-113 | 2.89420652  | 0.664 | 0.52  |
| IL1R12       | 4.20E-112 | 3.111187199 | 0.398 | 0.157 |
| USP321       | 1.22E-106 | 3.022333598 | 0.473 | 0.241 |
| IER32        | 2.59E-101 | 2.072501907 | 0.473 | 0.22  |
| LYN5         | 3.89E-98  | 2.097548058 | 0.592 | 0.367 |
| CREB52       | 2.46E-96  | 2.882065374 | 0.259 | 0.077 |
| NEDD9        | 5.93E-96  | 2.840894314 | 0.583 | 0.435 |
| GAB24        | 7.50E-95  | 2.394136614 | 0.536 | 0.326 |
| RABGEF11     | 7.95E-93  | 2.599845589 | 0.605 | 0.47  |
| FCGR2A2      | 9.63E-88  | 2.06325135  | 0.318 | 0.115 |
| PHACTR14     | 1.54E-86  | 2.432334643 | 0.407 | 0.197 |
| BCL61        | 3.35E-77  | 2.623308676 | 0.412 | 0.22  |

|             |          |             |       |       |
|-------------|----------|-------------|-------|-------|
| GLUL2       | 8.07E-77 | 2.076932799 | 0.429 | 0.222 |
| ICAM13      | 1.08E-74 | 2.434544665 | 0.38  | 0.186 |
| IRS23       | 7.24E-73 | 2.521692804 | 0.502 | 0.34  |
| ELL22       | 1.97E-72 | 2.107913914 | 0.661 | 0.624 |
| FAM49B      | 6.11E-69 | 2.224505152 | 0.649 | 0.674 |
| FTH14       | 8.81E-69 | 2.022212343 | 0.831 | 0.946 |
| SVIL1       | 7.09E-67 | 2.417431772 | 0.294 | 0.123 |
| MAML31      | 5.45E-63 | 2.465492103 | 0.376 | 0.199 |
| PGS11       | 5.24E-62 | 2.426303952 | 0.284 | 0.123 |
| ST6GALNAC31 | 5.30E-62 | 2.279082078 | 0.389 | 0.206 |
| AC099489.11 | 1.63E-61 | 2.332965608 | 0.333 | 0.155 |
| SAT14       | 8.09E-61 | 1.501918843 | 0.718 | 0.785 |
| C9orf723    | 8.79E-59 | 2.434712627 | 0.416 | 0.258 |
| ELF21       | 8.08E-58 | 2.749186471 | 0.518 | 0.416 |
| TOM12       | 3.27E-57 | 2.335271753 | 0.401 | 0.243 |
| RAB313      | 2.77E-56 | 2.101910957 | 0.34  | 0.169 |
| RNF144B4    | 6.59E-54 | 2.395187379 | 0.336 | 0.173 |
| ALOX5AP2    | 4.00E-53 | 2.297839376 | 0.496 | 0.387 |
| PTPRE3      | 1.21E-51 | 2.125923828 | 0.361 | 0.208 |
| B3GNT53     | 7.21E-51 | 2.17907886  | 0.265 | 0.119 |
| MCTP22      | 2.66E-50 | 3.337283451 | 0.365 | 0.219 |
| DDX60L1     | 3.02E-50 | 2.505559716 | 0.364 | 0.215 |
| ANKRD171    | 5.19E-50 | 0.418925369 | 0.205 | 0.579 |
| SIPA1L15    | 1.00E-49 | 1.32047502  | 0.7   | 0.68  |
| BABAM21     | 3.58E-49 | 0.279444536 | 0.139 | 0.452 |
| KDM6A1      | 5.88E-49 | 0.328775583 | 0.189 | 0.545 |
| ELOVL51     | 9.66E-49 | 0.289028972 | 0.211 | 0.583 |
| CPQ2        | 2.06E-46 | 2.338209122 | 0.358 | 0.215 |
| PILRA2      | 6.86E-46 | 2.101458311 | 0.254 | 0.118 |
| ABHD52      | 3.29E-45 | 2.704286402 | 0.346 | 0.205 |
| LAMTOR41    | 7.43E-45 | 0.289751676 | 0.169 | 0.49  |
| TYROBP3     | 7.55E-45 | 1.161822302 | 0.359 | 0.184 |
| COPA1       | 9.51E-45 | 0.307244322 | 0.158 | 0.471 |
| RESF12      | 4.60E-44 | 0.282379506 | 0.212 | 0.572 |
| PTPN122     | 7.06E-44 | 2.244047775 | 0.346 | 0.206 |
| PTEN1       | 1.45E-43 | 2.786021046 | 0.489 | 0.426 |
| ROCK11      | 2.72E-43 | 0.279593877 | 0.225 | 0.589 |
| SP3         | 5.08E-42 | 0.387629841 | 0.142 | 0.437 |
| NUMB1       | 9.36E-42 | 2.328795843 | 0.465 | 0.375 |
| USP31       | 1.09E-41 | 0.281896239 | 0.205 | 0.538 |
| BRAF1       | 1.79E-41 | 2.039779008 | 0.598 | 0.632 |
| ERBIN2      | 9.97E-41 | 0.369698163 | 0.194 | 0.512 |
| TRIP12      | 2.16E-40 | 0.400317286 | 0.171 | 0.479 |

|             |          |             |       |       |
|-------------|----------|-------------|-------|-------|
| SBF22       | 6.26E-40 | 2.077670119 | 0.349 | 0.217 |
| FCER1G3     | 6.54E-40 | 1.361132842 | 0.295 | 0.146 |
| TBC1D82     | 7.38E-40 | 2.804071824 | 0.322 | 0.192 |
| FOXO32      | 1.43E-39 | 2.226883966 | 0.437 | 0.341 |
| PLXNC12     | 1.50E-39 | 2.235621835 | 0.302 | 0.172 |
| PAFAH1B1    | 5.15E-39 | 0.561540956 | 0.251 | 0.624 |
| PKN21       | 7.26E-39 | 0.343121956 | 0.128 | 0.394 |
| FBXW71      | 1.15E-38 | 0.436044388 | 0.23  | 0.573 |
| MAPK11      | 2.51E-38 | 0.268833953 | 0.123 | 0.381 |
| EP300       | 3.42E-38 | 0.289285075 | 0.127 | 0.392 |
| CD46        | 4.86E-38 | 0.265766839 | 0.116 | 0.374 |
| GNAQ3       | 6.40E-38 | 2.56964785  | 0.367 | 0.24  |
| HMGB23      | 1.62E-37 | 0.338663724 | 0.165 | 0.455 |
| FBXO112     | 2.02E-37 | 0.372166669 | 0.223 | 0.55  |
| SPAG92      | 2.12E-37 | 2.202239876 | 0.516 | 0.49  |
| ZNF407      | 2.29E-37 | 0.289142675 | 0.125 | 0.387 |
| LCP13       | 2.97E-37 | 1.850044527 | 0.594 | 0.652 |
| ZNF4382     | 9.56E-37 | 2.125512492 | 0.258 | 0.135 |
| AP2B1       | 1.33E-35 | 0.367451612 | 0.128 | 0.386 |
| DYRK1A1     | 2.42E-35 | 0.355368815 | 0.245 | 0.583 |
| LSP13       | 2.53E-35 | 0.30249089  | 0.182 | 0.473 |
| HECA2       | 3.46E-35 | 0.382016437 | 0.198 | 0.505 |
| FOXK21      | 3.96E-35 | 0.265739659 | 0.09  | 0.315 |
| DAZAP2      | 7.37E-35 | 0.380389046 | 0.233 | 0.565 |
| GABARAPL22  | 1.76E-34 | 0.376912046 | 0.12  | 0.363 |
| CAPZB3      | 2.54E-34 | 0.348929271 | 0.251 | 0.591 |
| RASA21      | 4.38E-34 | 0.566035872 | 0.227 | 0.557 |
| AC016831.72 | 7.99E-34 | 0.252107161 | 0.241 | 0.562 |
| TLE42       | 1.01E-33 | 0.348463832 | 0.165 | 0.434 |
| RB1CC1      | 1.78E-33 | 0.397282838 | 0.142 | 0.401 |
| UBAP11      | 2.25E-33 | 2.396526555 | 0.419 | 0.345 |
| DDX213      | 3.60E-33 | 0.319438247 | 0.23  | 0.552 |
| TAOK32      | 3.74E-33 | 0.397499034 | 0.239 | 0.57  |
| N4BP11      | 4.21E-33 | 2.48138396  | 0.47  | 0.427 |
| SDCBP2      | 4.31E-33 | 1.752323749 | 0.546 | 0.567 |
| ACTR23      | 4.34E-33 | 0.450114678 | 0.28  | 0.646 |
| RUNX11      | 7.05E-33 | 0.3132704   | 0.225 | 0.528 |
| ANXA114     | 1.92E-32 | 0.334446783 | 0.127 | 0.369 |
| TOP11       | 5.07E-32 | 0.446601875 | 0.29  | 0.66  |
| SEMA4D2     | 6.89E-32 | 0.341709068 | 0.165 | 0.426 |
| VPS13B1     | 9.28E-32 | 0.619630969 | 0.265 | 0.611 |
| WSB11       | 1.17E-31 | 0.421263757 | 0.254 | 0.587 |
| DOCK111     | 2.15E-31 | 0.326428384 | 0.11  | 0.336 |

|          |          |             |       |       |
|----------|----------|-------------|-------|-------|
| PPP2R2A  | 3.41E-31 | 0.551543166 | 0.198 | 0.484 |
| TAOK1    | 6.55E-31 | 0.271627218 | 0.134 | 0.368 |
| UTY3     | 9.14E-31 | 0.285074671 | 0.13  | 0.362 |
| RAB5C4   | 1.48E-30 | 0.296869749 | 0.131 | 0.365 |
| WDR26    | 1.95E-30 | 0.33295246  | 0.149 | 0.391 |
| CSNK1A11 | 2.78E-30 | 0.482113598 | 0.269 | 0.609 |
| CYFIP21  | 2.84E-30 | 0.415301515 | 0.124 | 0.36  |
| RB13     | 3.40E-30 | 0.334403083 | 0.199 | 0.477 |
| RNASEK4  | 6.24E-30 | 0.455275753 | 0.296 | 0.661 |
| RAB1A1   | 8.63E-30 | 2.311308718 | 0.499 | 0.514 |
| CHMP2A1  | 1.57E-29 | 0.25362148  | 0.131 | 0.363 |
| EVI2B    | 1.85E-29 | 0.49943861  | 0.222 | 0.529 |
| XPO6     | 1.93E-29 | 2.470188977 | 0.352 | 0.26  |
| ST3GAL1  | 2.20E-29 | 0.292827613 | 0.147 | 0.385 |
| KMT2C    | 2.25E-29 | 0.431759907 | 0.269 | 0.601 |
| ETV63    | 2.40E-29 | 0.422691774 | 0.23  | 0.529 |
| PHF20L1  | 2.50E-29 | 2.382194978 | 0.405 | 0.333 |
| PTBP3    | 3.03E-29 | 0.394659325 | 0.171 | 0.43  |
| MPP72    | 5.25E-29 | 0.257727753 | 0.118 | 0.334 |
| USPL11   | 7.75E-29 | 0.315277782 | 0.114 | 0.33  |
| ZFAND32  | 8.49E-29 | 1.735880171 | 0.571 | 0.653 |
| CYSTEM13 | 1.16E-28 | 2.287664736 | 0.405 | 0.334 |
| ADIPOR21 | 3.19E-28 | 0.275247017 | 0.104 | 0.309 |
| STAT32   | 3.24E-28 | 1.96320522  | 0.575 | 0.656 |
| DOCK21   | 4.27E-28 | 0.552761578 | 0.264 | 0.591 |
| ATF63    | 1.29E-27 | 0.545294477 | 0.182 | 0.437 |
| AFF43    | 1.36E-27 | 0.411430885 | 0.254 | 0.57  |
| GCA2     | 1.47E-27 | 2.163433832 | 0.261 | 0.159 |
| RIPOR22  | 2.27E-27 | 2.042629487 | 0.488 | 0.489 |
| RELB1    | 3.17E-27 | 0.272961374 | 0.18  | 0.429 |
| FMNL11   | 3.29E-27 | 0.326074176 | 0.131 | 0.352 |
| RLF1     | 3.44E-27 | 0.361259895 | 0.233 | 0.515 |
| USP9X1   | 3.57E-27 | 0.636083741 | 0.214 | 0.507 |
| ESCO1    | 4.05E-27 | 0.320245852 | 0.084 | 0.271 |
| METTL91  | 4.90E-27 | 0.333278265 | 0.107 | 0.312 |
| BTBD71   | 5.83E-27 | 0.435966171 | 0.086 | 0.268 |
| BCAS31   | 9.67E-27 | 0.447071091 | 0.182 | 0.432 |
| NFE2L21  | 1.20E-26 | 1.841358189 | 0.516 | 0.54  |
| ATP6V0C2 | 1.26E-26 | 0.549947773 | 0.245 | 0.553 |
| ACAP21   | 1.26E-26 | 0.522584511 | 0.241 | 0.544 |
| LBR      | 1.45E-26 | 0.409451068 | 0.095 | 0.288 |
| CD442    | 1.46E-26 | 0.41263535  | 0.38  | 0.795 |
| OSBPL9   | 1.51E-26 | 0.457619136 | 0.122 | 0.33  |

|           |          |             |       |       |
|-----------|----------|-------------|-------|-------|
| RUBCNL2   | 1.63E-26 | 1.94752656  | 0.259 | 0.155 |
| MAML22    | 1.81E-26 | 0.311598547 | 0.29  | 0.587 |
| ZFP36L14  | 3.14E-26 | 0.543786665 | 0.224 | 0.508 |
| NCOA13    | 4.61E-26 | 0.573167473 | 0.236 | 0.529 |
| CNN22     | 5.47E-26 | 0.283185933 | 0.106 | 0.3   |
| PIAS12    | 7.22E-26 | 0.541160584 | 0.237 | 0.529 |
| SNRK1     | 1.24E-25 | 0.292018931 | 0.096 | 0.283 |
| ARID4B2   | 2.25E-25 | 0.375631136 | 0.387 | 0.792 |
| TBC1D152  | 5.31E-25 | 0.795410103 | 0.208 | 0.484 |
| MAPRE1    | 7.40E-25 | 0.3443527   | 0.111 | 0.304 |
| CCNL1     | 9.96E-25 | 0.517989755 | 0.34  | 0.726 |
| GSK3B     | 2.39E-24 | 0.494791857 | 0.171 | 0.406 |
| MAP3K22   | 2.58E-24 | 0.550802179 | 0.286 | 0.609 |
| CHMP2B    | 3.40E-24 | 0.292471029 | 0.102 | 0.288 |
| PPP1R181  | 4.22E-24 | 0.304878872 | 0.08  | 0.252 |
| GBP51     | 5.36E-24 | 0.331700456 | 0.084 | 0.256 |
| TAGLN23   | 5.72E-24 | 0.384005875 | 0.261 | 0.561 |
| H2AFY4    | 1.43E-23 | 0.316079268 | 0.131 | 0.33  |
| GSTO13    | 1.49E-23 | 0.250511179 | 0.137 | 0.34  |
| SSH22     | 1.74E-23 | 0.286584725 | 0.339 | 0.671 |
| JARID22   | 2.87E-23 | 0.425192403 | 0.288 | 0.596 |
| CWC25     | 2.95E-23 | 0.330367554 | 0.096 | 0.275 |
| TBXAS13   | 3.09E-23 | 1.872972278 | 0.292 | 0.196 |
| DNTTIP2   | 3.60E-23 | 0.51900294  | 0.149 | 0.363 |
| TSG101    | 4.44E-23 | 0.468697927 | 0.084 | 0.253 |
| ANKRD112  | 4.65E-23 | 0.403521363 | 0.376 | 0.75  |
| CSNK1D2   | 5.88E-23 | 0.58541558  | 0.184 | 0.42  |
| ATP6V1H1  | 6.09E-23 | 0.376962701 | 0.134 | 0.334 |
| RAB7A3    | 8.40E-23 | 1.967781999 | 0.525 | 0.604 |
| NCOA22    | 8.61E-23 | 0.671275062 | 0.252 | 0.536 |
| RALGDS1   | 9.48E-23 | 0.344055128 | 0.12  | 0.31  |
| CELF22    | 1.27E-22 | 0.345162874 | 0.375 | 0.731 |
| AGFG11    | 2.97E-22 | 0.716866772 | 0.164 | 0.379 |
| PCBP1-AS1 | 4.32E-22 | 2.314699042 | 0.307 | 0.229 |
| TAGAP     | 4.56E-22 | 0.821071694 | 0.177 | 0.411 |
| GPR1321   | 5.30E-22 | 0.345041284 | 0.134 | 0.326 |
| VPS26A    | 6.35E-22 | 0.411617924 | 0.122 | 0.311 |
| TXN4      | 7.12E-22 | 0.254731631 | 0.236 | 0.492 |
| ECHDC1    | 9.55E-22 | 0.772550848 | 0.108 | 0.288 |
| CSTB2     | 1.06E-21 | 0.491992554 | 0.199 | 0.435 |
| NOL10     | 1.07E-21 | 0.674414713 | 0.088 | 0.252 |
| TSC22D23  | 1.25E-21 | 0.35164807  | 0.165 | 0.372 |
| CTNNBL11  | 1.95E-21 | 0.458931361 | 0.1   | 0.269 |

|            |          |             |       |       |
|------------|----------|-------------|-------|-------|
| CAPZA21    | 2.41E-21 | 0.607298057 | 0.2   | 0.439 |
| FAM172A    | 2.88E-21 | 0.909129674 | 0.257 | 0.558 |
| TKT2       | 3.45E-21 | 0.432654932 | 0.134 | 0.324 |
| IRAK23     | 4.69E-21 | 1.983257318 | 0.275 | 0.185 |
| HIVEP21    | 7.01E-21 | 0.671703992 | 0.276 | 0.558 |
| CAP14      | 1.19E-20 | 0.680763604 | 0.22  | 0.469 |
| TRAK14     | 1.40E-20 | 0.294096086 | 0.131 | 0.314 |
| DOCK82     | 1.99E-20 | 0.703475452 | 0.342 | 0.702 |
| SHOC22     | 8.55E-20 | 0.708238877 | 0.161 | 0.367 |
| MIDN2      | 8.84E-20 | 0.449323359 | 0.129 | 0.307 |
| SCLT1      | 1.03E-19 | 0.618389897 | 0.158 | 0.359 |
| ASAH12     | 1.40E-19 | 2.023003881 | 0.324 | 0.252 |
| WWP21      | 1.63E-19 | 0.574870216 | 0.133 | 0.317 |
| SYNE12     | 1.83E-19 | 0.69068008  | 0.141 | 0.331 |
| PLCG24     | 2.17E-19 | 0.387166632 | 0.133 | 0.311 |
| GNB23      | 2.33E-19 | 0.381286272 | 0.113 | 0.281 |
| NUP581     | 2.38E-19 | 0.52816442  | 0.135 | 0.316 |
| MAP1LC3B   | 4.09E-19 | 0.580805679 | 0.313 | 0.637 |
| GNA134     | 5.28E-19 | 0.718646744 | 0.218 | 0.457 |
| MEF2D      | 6.53E-19 | 0.431977489 | 0.096 | 0.253 |
| KDM4B2     | 8.26E-19 | 0.522881384 | 0.152 | 0.344 |
| DDX3Y1     | 9.82E-19 | 0.438180776 | 0.151 | 0.338 |
| SELL2      | 1.04E-18 | 0.413157703 | 0.117 | 0.287 |
| FLOT12     | 1.07E-18 | 1.869122604 | 0.284 | 0.206 |
| SLC12A62   | 1.28E-18 | 1.929738357 | 0.319 | 0.253 |
| TXNDC112   | 1.89E-18 | 0.398838712 | 0.116 | 0.278 |
| RASSF52    | 2.44E-18 | 0.515642632 | 0.165 | 0.359 |
| CCDC931    | 2.54E-18 | 0.505248132 | 0.1   | 0.255 |
| ATP6V0B4   | 2.99E-18 | 0.655214121 | 0.171 | 0.374 |
| NAPA3      | 3.09E-18 | 0.595369932 | 0.164 | 0.358 |
| PFKFB32    | 5.39E-18 | 2.005548996 | 0.424 | 0.418 |
| JMJD62     | 7.21E-18 | 0.321633603 | 0.123 | 0.285 |
| DENND1A2   | 7.22E-18 | 0.49857827  | 0.155 | 0.34  |
| AHCTF1     | 7.23E-18 | 0.602267368 | 0.13  | 0.302 |
| LGALS33    | 7.29E-18 | 0.547923137 | 0.169 | 0.352 |
| NRDC       | 8.20E-18 | 0.912009075 | 0.188 | 0.408 |
| TPM34      | 8.28E-18 | 0.475839643 | 0.339 | 0.674 |
| NFKB13     | 1.06E-17 | 1.410423661 | 0.54  | 0.603 |
| EXT12      | 1.20E-17 | 0.553895812 | 0.177 | 0.371 |
| USP4       | 1.55E-17 | 0.445390936 | 0.112 | 0.268 |
| TBC1D11    | 1.87E-17 | 0.643823807 | 0.152 | 0.333 |
| GABARAPL12 | 2.53E-17 | 0.473842599 | 0.133 | 0.301 |
| APBB1IP2   | 2.64E-17 | 0.796061867 | 0.296 | 0.59  |

|           |          |             |       |       |
|-----------|----------|-------------|-------|-------|
| SOS21     | 3.20E-17 | 0.735764454 | 0.155 | 0.341 |
| GPCPD13   | 4.23E-17 | 0.612168422 | 0.302 | 0.586 |
| RNF19B1   | 4.46E-17 | 1.857943779 | 0.258 | 0.182 |
| RLIM      | 5.62E-17 | 0.604024127 | 0.113 | 0.269 |
| RILPL25   | 6.49E-17 | 1.965096751 | 0.436 | 0.446 |
| IRF12     | 7.56E-17 | 0.782531686 | 0.28  | 0.557 |
| ARHGAP152 | 9.37E-17 | 1.497885264 | 0.641 | 0.849 |
| BAZ1A1    | 1.65E-16 | 0.759347023 | 0.273 | 0.538 |
| CHST112   | 2.37E-16 | 0.418396351 | 0.414 | 0.773 |
| SRGAP25   | 3.32E-16 | 0.454306278 | 0.123 | 0.277 |
| PTK2B1    | 3.53E-16 | 0.552284381 | 0.181 | 0.372 |
| ZFC3H11   | 4.41E-16 | 0.62711201  | 0.182 | 0.377 |
| GTPBP11   | 5.80E-16 | 2.202037864 | 0.325 | 0.278 |
| ILRUN1    | 6.59E-16 | 0.68255483  | 0.137 | 0.301 |
| TES1      | 6.86E-16 | 0.547498518 | 0.137 | 0.299 |
| SDCCAG83  | 8.31E-16 | 0.454687541 | 0.11  | 0.255 |
| PPFIA11   | 8.31E-16 | 0.413174104 | 0.11  | 0.252 |
| IFRD1     | 1.03E-15 | 2.381944973 | 0.443 | 0.473 |
| HCLS1     | 1.16E-15 | 0.814805766 | 0.277 | 0.546 |
| GNAI3     | 1.45E-15 | 0.998883147 | 0.198 | 0.402 |
| ATP6V1D   | 2.37E-15 | 0.71692014  | 0.136 | 0.297 |
| NFKBIZ2   | 2.68E-15 | 1.746924113 | 0.443 | 0.469 |
| PNRC11    | 3.03E-15 | 0.523414883 | 0.406 | 0.784 |
| STK101    | 3.06E-15 | 0.615075135 | 0.235 | 0.468 |
| GABARAP3  | 5.65E-15 | 0.628983614 | 0.301 | 0.591 |
| FTL3      | 7.16E-15 | 0.704613941 | 0.694 | 0.932 |
| CREBBP2   | 8.53E-15 | 0.865628589 | 0.267 | 0.528 |
| PPP1R15B1 | 8.94E-15 | 0.486361129 | 0.122 | 0.267 |
| PAK14     | 1.06E-14 | 1.984823538 | 0.252 | 0.186 |
| NDRG12    | 1.13E-14 | 0.538223955 | 0.139 | 0.295 |
| PPP3CA2   | 1.15E-14 | 0.674863393 | 0.248 | 0.475 |
| ARFGAP32  | 1.49E-14 | 0.408096523 | 0.134 | 0.283 |
| MARCKS4   | 1.51E-14 | 1.553278553 | 0.252 | 0.18  |
| UBE2H1    | 1.56E-14 | 0.838117244 | 0.277 | 0.533 |
| SUPT6H    | 1.80E-14 | 0.751956223 | 0.167 | 0.338 |
| GRB24     | 2.05E-14 | 0.780634526 | 0.317 | 0.607 |
| GTF2H12   | 2.22E-14 | 0.551317388 | 0.112 | 0.253 |
| ARIH11    | 2.62E-14 | 0.588372507 | 0.406 | 0.766 |
| RAB8B2    | 3.50E-14 | 0.739470754 | 0.286 | 0.535 |
| TNIP11    | 3.59E-14 | 0.488874725 | 0.151 | 0.311 |
| FOXP13    | 4.17E-14 | 0.345769044 | 0.429 | 0.749 |
| AP1G1     | 5.43E-14 | 0.897685888 | 0.18  | 0.36  |
| NDEL1     | 5.43E-14 | 2.354887615 | 0.336 | 0.308 |



|           |          |             |       |       |
|-----------|----------|-------------|-------|-------|
| S100A114  | 5.73E-14 | 1.10918101  | 0.53  | 0.599 |
| SPATA132  | 8.36E-14 | 0.647517808 | 0.125 | 0.267 |
| PLEKHB22  | 8.55E-14 | 0.633340591 | 0.158 | 0.323 |
| EFHD23    | 1.48E-13 | 0.449272576 | 0.184 | 0.359 |
| CSRN11    | 1.73E-13 | 0.634012051 | 0.135 | 0.283 |
| USP10     | 2.24E-13 | 0.72855714  | 0.135 | 0.285 |
| NSMCE2    | 2.85E-13 | 0.891141349 | 0.237 | 0.452 |
| CLTC2     | 3.69E-13 | 0.690238973 | 0.159 | 0.32  |
| RAPGEF21  | 4.78E-13 | 0.764897437 | 0.208 | 0.401 |
| NABP11    | 5.19E-13 | 2.058986058 | 0.364 | 0.35  |
| ZSWIM63   | 5.25E-13 | 1.496260447 | 0.536 | 0.639 |
| WTAP2     | 5.93E-13 | 0.939151846 | 0.317 | 0.604 |
| USP152    | 6.48E-13 | 1.503064782 | 0.569 | 0.749 |
| DSE3      | 9.91E-13 | 1.597671981 | 0.254 | 0.194 |
| TALDO14   | 1.12E-12 | 0.70681846  | 0.164 | 0.325 |
| HIPK32    | 1.45E-12 | 0.901304478 | 0.163 | 0.321 |
| SRPK22    | 1.73E-12 | 1.070812629 | 0.299 | 0.569 |
| PDXK2     | 1.99E-12 | 0.358900261 | 0.136 | 0.274 |
| FAM126B   | 3.12E-12 | 0.782804882 | 0.122 | 0.253 |
| MAPK14    | 3.22E-12 | 0.682284912 | 0.12  | 0.25  |
| OXS12     | 3.84E-12 | 2.020886558 | 0.347 | 0.327 |
| MAP4K44   | 5.77E-12 | 1.779345171 | 0.482 | 0.553 |
| CD582     | 7.31E-12 | 0.633312247 | 0.213 | 0.394 |
| FBXO343   | 7.71E-12 | 0.939263905 | 0.249 | 0.457 |
| CREBRF1   | 7.76E-12 | 0.950111571 | 0.233 | 0.445 |
| TRAF3IP3  | 8.05E-12 | 0.78723141  | 0.13  | 0.266 |
| YTHDF31   | 9.13E-12 | 0.808806715 | 0.199 | 0.38  |
| TUT71     | 9.62E-12 | 0.740185436 | 0.233 | 0.431 |
| MAPKAPK21 | 1.03E-11 | 0.631840063 | 0.166 | 0.323 |
| UBE2E13   | 1.21E-11 | 0.774980576 | 0.146 | 0.288 |
| NFAT53    | 1.65E-11 | 0.750312156 | 0.308 | 0.557 |
| NPTN3     | 1.65E-11 | 0.467170574 | 0.125 | 0.251 |
| HIVEP13   | 1.69E-11 | 0.716118647 | 0.229 | 0.417 |
| VSIR2     | 2.29E-11 | 0.743023333 | 0.135 | 0.269 |
| MGAT12    | 2.83E-11 | 0.330688155 | 0.13  | 0.255 |
| JOSD1     | 4.66E-11 | 0.952909405 | 0.235 | 0.434 |
| LAPTM55   | 6.45E-11 | 0.362703539 | 0.405 | 0.713 |
| IQGAP12   | 6.52E-11 | 0.582327672 | 0.395 | 0.713 |
| PNPLA81   | 6.52E-11 | 1.953674033 | 0.398 | 0.425 |
| RAB27A2   | 9.20E-11 | 1.009216126 | 0.19  | 0.355 |
| KIAA0232  | 9.48E-11 | 0.811891499 | 0.148 | 0.286 |
| HIF1A3    | 1.01E-10 | 1.588865842 | 0.472 | 0.554 |
| PSEN11    | 1.07E-10 | 1.829900774 | 0.389 | 0.41  |

|            |          |             |       |       |
|------------|----------|-------------|-------|-------|
| LIMS12     | 1.26E-10 | 0.67113154  | 0.275 | 0.488 |
| RNF132     | 1.47E-10 | 1.881339998 | 0.335 | 0.321 |
| SORL11     | 1.88E-10 | 1.903223484 | 0.294 | 0.26  |
| ENSA2      | 2.28E-10 | 1.025381213 | 0.318 | 0.585 |
| CHD11      | 2.56E-10 | 1.866869699 | 0.489 | 0.606 |
| ADAM172    | 3.13E-10 | 0.644879634 | 0.157 | 0.295 |
| ARPC54     | 4.31E-10 | 0.760607716 | 0.289 | 0.528 |
| RTN43      | 4.81E-10 | 0.89187966  | 0.284 | 0.508 |
| GPR653     | 5.63E-10 | 0.690507294 | 0.129 | 0.251 |
| EIF4G31    | 5.89E-10 | 1.028019697 | 0.261 | 0.479 |
| ACTR34     | 6.62E-10 | 1.847792827 | 0.48  | 0.6   |
| SUSD61     | 7.08E-10 | 1.964718621 | 0.36  | 0.366 |
| GCH11      | 9.35E-10 | 0.80007258  | 0.166 | 0.304 |
| MAPK61     | 1.01E-09 | 0.516882927 | 0.148 | 0.271 |
| ZNF2671    | 1.17E-09 | 1.638581277 | 0.322 | 0.3   |
| SLC2A32    | 1.42E-09 | 1.832174158 | 0.427 | 0.474 |
| B4GALT51   | 2.90E-09 | 1.695525535 | 0.251 | 0.207 |
| PPP1CB2    | 3.39E-09 | 0.955816173 | 0.343 | 0.607 |
| PHF21A1    | 7.14E-09 | 1.037363078 | 0.178 | 0.321 |
| BNIP3L2    | 8.16E-09 | 0.72365171  | 0.172 | 0.306 |
| CD532      | 9.23E-09 | 0.69660014  | 0.396 | 0.719 |
| PREX1      | 1.15E-08 | 1.91708799  | 0.382 | 0.416 |
| QKI2       | 1.23E-08 | 1.382711663 | 0.448 | 0.502 |
| RAB211     | 1.84E-08 | 1.133788403 | 0.248 | 0.438 |
| UBE2B2     | 2.29E-08 | 0.75749713  | 0.393 | 0.697 |
| MED13L3    | 3.01E-08 | 1.584791688 | 0.48  | 0.602 |
| RTN31      | 5.25E-08 | 0.857710625 | 0.183 | 0.32  |
| LAMP12     | 5.45E-08 | 0.87782943  | 0.173 | 0.305 |
| CASP41     | 5.71E-08 | 1.00343848  | 0.222 | 0.39  |
| IL4R1      | 9.71E-08 | 0.805602712 | 0.164 | 0.286 |
| HNRNPC1    | 1.13E-07 | 0.696570423 | 0.48  | 0.859 |
| PLSCR13    | 1.46E-07 | 1.517486708 | 0.289 | 0.268 |
| PDZD81     | 1.55E-07 | 0.985375067 | 0.145 | 0.252 |
| MTMR31     | 1.72E-07 | 1.956374515 | 0.278 | 0.259 |
| DIP2B2     | 2.58E-07 | 0.978048361 | 0.223 | 0.378 |
| CSGALNACT2 | 3.17E-07 | 0.874243004 | 0.23  | 0.387 |
| PSAP2      | 3.35E-07 | 0.498476164 | 0.253 | 0.419 |
| SRPK1      | 3.54E-07 | 1.05270991  | 0.146 | 0.256 |
| SGK13      | 4.44E-07 | 1.366845786 | 0.252 | 0.216 |
| PPP4R21    | 4.67E-07 | 1.153667302 | 0.231 | 0.396 |
| PICALM2    | 5.50E-07 | 1.658185745 | 0.467 | 0.589 |
| ATP11B     | 6.09E-07 | 1.465224587 | 0.294 | 0.509 |
| ITM2B3     | 8.27E-07 | 0.740158821 | 0.447 | 0.788 |

|           |             |             |       |       |
|-----------|-------------|-------------|-------|-------|
| UBE2W1    | 8.90E-07    | 1.107995161 | 0.157 | 0.268 |
| PCNX12    | 9.44E-07    | 1.78437139  | 0.418 | 0.502 |
| HPCAL11   | 9.60E-07    | 0.992616778 | 0.158 | 0.268 |
| SLC16A32  | 1.43E-06    | 0.871448328 | 0.151 | 0.255 |
| COP11     | 1.75E-06    | 1.110074222 | 0.313 | 0.538 |
| RALGAPA2  | 2.66E-06    | 1.819031675 | 0.261 | 0.245 |
| TANK1     | 3.08E-06    | 0.960754907 | 0.371 | 0.613 |
| KLHL21    | 3.58E-06    | 1.078083752 | 0.154 | 0.26  |
| TNFAIP35  | 4.22E-06    | 0.695420665 | 0.587 | 0.717 |
| UBE2D12   | 4.39E-06    | 0.754776334 | 0.153 | 0.254 |
| SH3BP55   | 4.44E-06    | 1.632216581 | 0.307 | 0.308 |
| NUP981    | 4.92E-06    | 1.162854005 | 0.324 | 0.553 |
| FAM49A5   | 5.72E-06    | 0.430596606 | 0.178 | 0.282 |
| ELMO12    | 1.20E-05    | 1.03779495  | 0.407 | 0.707 |
| DNM21     | 1.64E-05    | 1.076717478 | 0.234 | 0.383 |
| RAB5A     | 1.99E-05    | 1.134846088 | 0.213 | 0.351 |
| RYBP2     | 2.44E-05    | 1.141607685 | 0.292 | 0.483 |
| MAP3K84   | 3.12E-05    | 0.837878982 | 0.275 | 0.429 |
| VPS37B1   | 3.61E-05    | 1.585390351 | 0.395 | 0.457 |
| KIF1B2    | 5.32E-05    | 0.783831355 | 0.173 | 0.27  |
| CEP1705   | 5.37E-05    | 0.589449933 | 0.163 | 0.254 |
| AGTPBP11  | 5.38E-05    | 1.816370398 | 0.269 | 0.266 |
| ATP13A33  | 5.56E-05    | 1.507306842 | 0.313 | 0.326 |
| NSMAF     | 6.34E-05    | 1.073145811 | 0.163 | 0.262 |
| TNFRSF1B2 | 6.69E-05    | 0.855187683 | 0.289 | 0.462 |
| ATG72     | 8.25E-05    | 1.636071864 | 0.325 | 0.353 |
| MCL12     | 8.35E-05    | 1.159531727 | 0.489 | 0.66  |
| S100A64   | 0.000109602 | 1.238450066 | 0.488 | 0.641 |
| TBL1X1    | 0.000138497 | 0.913228972 | 0.204 | 0.32  |
| POR2      | 0.000155923 | 1.007334684 | 0.16  | 0.25  |
| MYO9B3    | 0.000165174 | 0.980425922 | 0.252 | 0.4   |
| GNB11     | 0.00016805  | 0.952547777 | 0.358 | 0.594 |
| VMP11     | 0.000176665 | 1.627245754 | 0.439 | 0.57  |
| PACSIN22  | 0.000178902 | 1.475923363 | 0.273 | 0.274 |
| DPYD2     | 0.000200667 | 1.514218568 | 0.416 | 0.511 |
| ATP6V0D13 | 0.000211671 | 0.806251697 | 0.198 | 0.304 |
| CMTM65    | 0.000272938 | 1.051026896 | 0.28  | 0.447 |
| CAMK1D3   | 0.000385758 | 1.534323711 | 0.453 | 0.575 |
| MAP2K31   | 0.000436437 | 0.852390321 | 0.178 | 0.272 |
| APLP22    | 0.000703232 | 0.862288623 | 0.267 | 0.412 |
| TBK11     | 0.000790213 | 1.236904115 | 0.195 | 0.297 |
| CTSS3     | 0.000845474 | 1.248229676 | 0.408 | 0.503 |
| STX111    | 0.001040674 | 1.564835889 | 0.255 | 0.259 |

|             |             |             |       |       |
|-------------|-------------|-------------|-------|-------|
| IFITM22     | 0.00106571  | 2.126733402 | 0.463 | 0.635 |
| PRKDC       | 0.0011863   | 2.037715476 | 0.249 | 0.391 |
| AZIN11      | 0.001254736 | 1.060944754 | 0.23  | 0.35  |
| RASSF31     | 0.00132164  | 0.9044167   | 0.206 | 0.304 |
| ERN13       | 0.001631678 | 1.102401318 | 0.26  | 0.387 |
| BAZ2B2      | 0.001640436 | 1.197820906 | 0.194 | 0.29  |
| ETF11       | 0.002711381 | 1.726731329 | 0.347 | 0.415 |
| PTPRJ2      | 0.002830733 | 0.913637519 | 0.305 | 0.458 |
| CDC42EP32   | 0.002904593 | 0.960409908 | 0.211 | 0.313 |
| AC020916.13 | 0.003660328 | 1.105089877 | 0.217 | 0.321 |
| CCNH2       | 0.004227707 | 1.098228569 | 0.413 | 0.663 |
| ATG33       | 0.005185637 | 1.272191857 | 0.195 | 0.287 |
| UBE2R21     | 0.005542143 | 1.203964032 | 0.259 | 0.391 |
| SKIL2       | 0.006801372 | 0.853559462 | 0.369 | 0.568 |
| GTDC12      | 0.007261324 | 1.207489    | 0.228 | 0.33  |
| ATP2B13     | 0.008801852 | 1.383865158 | 0.475 | 0.653 |
| PRPSAP21    | 0           | 3.805285394 | 0.88  | 0.117 |
| RAPGEF5     | 0           | 3.511527771 | 0.909 | 0.041 |
| AC023590.1  | 0           | 2.995102281 | 0.909 | 0.075 |
| RGS13       | 0           | 2.989727406 | 0.884 | 0.079 |
| TCL1A1      | 0           | 2.988546383 | 0.921 | 0.073 |
| LMO21       | 0           | 2.927208231 | 0.868 | 0.054 |
| CD223       | 0           | 2.692840737 | 0.938 | 0.118 |
| NEIL1       | 0           | 2.536027732 | 0.888 | 0.051 |
| BCL7A       | 0           | 2.492894411 | 0.868 | 0.053 |
| ZNF608      | 0           | 2.484992823 | 0.851 | 0.027 |
| CCDC144A    | 0           | 2.457399025 | 0.624 | 0.042 |
| AFF2        | 0           | 2.336458225 | 0.806 | 0.028 |
| SUGCT       | 0           | 2.276940657 | 0.624 | 0.017 |
| MEF2B1      | 0           | 2.190728821 | 0.826 | 0.052 |
| MYBL1       | 0           | 2.065775519 | 0.798 | 0.078 |
| FGD6        | 0           | 2.046769379 | 0.661 | 0.061 |
| IGF2BP3     | 0           | 2.030698829 | 0.748 | 0.028 |
| POU2AF13    | 0           | 1.951483867 | 0.893 | 0.106 |
| PDGFD       | 0           | 1.867268403 | 0.731 | 0.045 |
| PEG10       | 0           | 1.84448454  | 0.574 | 0.037 |
| AC104170.1  | 0           | 1.811197517 | 0.603 | 0.026 |
| LINC02576   | 0           | 1.77548814  | 0.723 | 0.062 |
| MME         | 0           | 1.745857672 | 0.682 | 0.018 |
| KIAA1211    | 0           | 1.71331577  | 0.591 | 0.01  |
| CFAP299     | 0           | 1.711583978 | 0.43  | 0.01  |
| DTX1        | 0           | 1.534180858 | 0.632 | 0.027 |
| HRK         | 0           | 1.524667132 | 0.541 | 0.013 |

|            |           |             |       |       |
|------------|-----------|-------------|-------|-------|
| DMD        | 0         | 1.519525634 | 0.599 | 0.036 |
| NUGGC1     | 0         | 1.514067056 | 0.636 | 0.041 |
| SERPINA9   | 0         | 1.446435818 | 0.529 | 0.003 |
| EML6       | 0         | 1.419034351 | 0.463 | 0.028 |
| MIR3681HG  | 0         | 1.346247056 | 0.479 | 0.024 |
| KLHL14     | 0         | 1.335086794 | 0.55  | 0.027 |
| AC119673.2 | 0         | 1.32156971  | 0.339 | 0.005 |
| GCSAM      | 0         | 1.31952667  | 0.558 | 0.033 |
| MYBL2      | 0         | 1.278630601 | 0.5   | 0.023 |
| ARHGAP44   | 0         | 1.265747922 | 0.434 | 0.012 |
| AC079163.2 | 0         | 1.146222568 | 0.388 | 0.007 |
| TCL6       | 0         | 1.05321311  | 0.442 | 0.01  |
| TRIM55     | 0         | 1.039240714 | 0.252 | 0.005 |
| ACY3       | 0         | 1.012545118 | 0.421 | 0.006 |
| AC016168.2 | 0         | 1.004790198 | 0.45  | 0.009 |
| VNN2       | 0         | 0.984815686 | 0.583 | 0.047 |
| LINC01991  | 0         | 0.965443994 | 0.368 | 0.004 |
| AC112196.1 | 0         | 0.94573504  | 0.413 | 0.004 |
| LOXL2      | 0         | 0.915902207 | 0.368 | 0.015 |
| PEX5       | 0         | 0.893811977 | 0.405 | 0.021 |
| SYBU       | 0         | 0.890779485 | 0.368 | 0.009 |
| FAM81A     | 0         | 0.883454481 | 0.347 | 0.01  |
| AICDA      | 0         | 0.878367585 | 0.36  | 0.002 |
| ELL3       | 0         | 0.862777871 | 0.413 | 0.007 |
| CDCA7      | 0         | 0.828606652 | 0.355 | 0.015 |
| ASAP3      | 0         | 0.690168795 | 0.285 | 0.004 |
| AL132996.1 | 0         | 0.622871289 | 0.298 | 0.01  |
| HTR3A      | 0         | 0.589614638 | 0.331 | 0.01  |
| ASB13      | 0         | 0.580339375 | 0.289 | 0.011 |
| RASSF61    | 3.93E-301 | 1.476568038 | 0.558 | 0.045 |
| SLC2A5     | 4.34E-301 | 1.478691658 | 0.583 | 0.051 |
| BIK        | 8.99E-299 | 0.976275102 | 0.483 | 0.035 |
| CDCA2      | 1.72E-297 | 0.918875722 | 0.335 | 0.016 |
| A4GALT     | 6.93E-290 | 0.497876092 | 0.281 | 0.012 |
| PAX53      | 1.14E-272 | 1.729099484 | 0.88  | 0.123 |
| MND1       | 1.42E-271 | 0.594278891 | 0.252 | 0.01  |
| LINC008771 | 5.35E-270 | 1.05193825  | 0.545 | 0.049 |
| CPNE51     | 1.66E-268 | 1.127555096 | 0.57  | 0.054 |
| LINC01857  | 9.05E-267 | 1.184915177 | 0.529 | 0.045 |
| RNFT2      | 6.14E-263 | 0.714062614 | 0.343 | 0.019 |
| FAM106A    | 3.36E-262 | 1.965856418 | 0.467 | 0.038 |
| BLK3       | 3.00E-261 | 1.964874182 | 0.868 | 0.129 |
| GALNT14    | 7.33E-259 | 0.910073871 | 0.339 | 0.019 |

|            |           |             |       |       |
|------------|-----------|-------------|-------|-------|
| S1PR2      | 9.65E-254 | 0.835634151 | 0.413 | 0.029 |
| DCAF12     | 2.29E-249 | 1.25833181  | 0.628 | 0.07  |
| STAP13     | 6.12E-245 | 1.711521465 | 0.798 | 0.114 |
| CNR21      | 3.99E-243 | 1.233044262 | 0.587 | 0.06  |
| MTA3       | 3.91E-237 | 1.489197636 | 0.674 | 0.085 |
| TMED8      | 3.77E-235 | 1.565053321 | 0.756 | 0.109 |
| PTK23      | 3.11E-232 | 1.846519777 | 0.835 | 0.137 |
| HHEX       | 3.78E-231 | 1.4802254   | 0.595 | 0.068 |
| P2RX52     | 8.14E-231 | 1.76632994  | 0.843 | 0.141 |
| SOX51      | 2.41E-229 | 2.783716606 | 0.674 | 0.09  |
| SHCBP1     | 7.32E-229 | 0.693007094 | 0.306 | 0.018 |
| CXCR51     | 3.39E-228 | 1.476137549 | 0.669 | 0.085 |
| CD79B3     | 6.58E-228 | 2.565182211 | 0.926 | 0.2   |
| MYO1E4     | 1.54E-227 | 2.793645477 | 0.926 | 0.193 |
| MS4A13     | 1.63E-226 | 2.321508017 | 0.975 | 0.192 |
| FCRLA      | 2.30E-225 | 1.003000406 | 0.517 | 0.05  |
| LRMP1      | 7.50E-224 | 3.162318661 | 0.983 | 0.26  |
| CD191      | 4.50E-222 | 1.038380802 | 0.632 | 0.075 |
| OGG1       | 6.58E-221 | 0.947654023 | 0.55  | 0.058 |
| VPREB32    | 2.73E-220 | 2.202352523 | 0.773 | 0.119 |
| BCAS42     | 2.17E-217 | 1.739723799 | 0.847 | 0.151 |
| AC022167.3 | 5.05E-216 | 0.540610929 | 0.277 | 0.015 |
| EBF13      | 1.28E-214 | 2.272586872 | 0.963 | 0.194 |
| PCLAF      | 6.24E-210 | 1.210334745 | 0.393 | 0.032 |
| SPATS22    | 7.67E-209 | 1.744289009 | 0.826 | 0.152 |
| COBLL14    | 1.07E-208 | 1.692623495 | 0.872 | 0.157 |
| CR2        | 7.81E-207 | 0.704454384 | 0.384 | 0.03  |
| KCNH8      | 6.34E-206 | 1.030672893 | 0.483 | 0.047 |
| E2F51      | 5.84E-205 | 1.153569274 | 0.645 | 0.085 |
| SCIMP3     | 1.03E-203 | 1.190602389 | 0.665 | 0.093 |
| GCNT2      | 3.54E-200 | 1.252291986 | 0.529 | 0.06  |
| LYPLAL1    | 4.56E-200 | 1.330287289 | 0.715 | 0.11  |
| IRF85      | 1.35E-196 | 1.884383606 | 0.975 | 0.232 |
| CNR1       | 5.96E-195 | 0.672442799 | 0.347 | 0.026 |
| IFNLR1     | 6.85E-191 | 1.271850888 | 0.545 | 0.067 |
| LRRK13     | 3.42E-186 | 1.600395402 | 0.657 | 0.101 |
| MEF2C5     | 1.00E-185 | 2.394358461 | 0.979 | 0.276 |
| SH3RF1     | 1.55E-185 | 0.8478373   | 0.401 | 0.037 |
| PNOC       | 2.45E-184 | 0.71120746  | 0.405 | 0.038 |
| TERF2      | 1.31E-182 | 1.413500196 | 0.769 | 0.143 |
| SMIM144    | 4.19E-182 | 2.267243221 | 0.864 | 0.197 |
| FANCA      | 5.43E-178 | 1.309165538 | 0.529 | 0.067 |
| BASP15     | 5.97E-178 | 2.089178914 | 0.979 | 0.291 |

|             |           |             |       |       |
|-------------|-----------|-------------|-------|-------|
| WDR66       | 1.61E-177 | 0.65149102  | 0.331 | 0.026 |
| LHFPL6      | 1.36E-175 | 1.370902672 | 0.5   | 0.06  |
| AC011447.3  | 1.65E-175 | 0.787846926 | 0.314 | 0.024 |
| RAB303      | 2.55E-175 | 2.1514768   | 0.921 | 0.248 |
| SWAP704     | 4.32E-175 | 1.900294211 | 0.942 | 0.238 |
| BCL11A3     | 1.29E-173 | 1.748987751 | 0.835 | 0.171 |
| PRDM15      | 7.31E-173 | 0.866130885 | 0.384 | 0.037 |
| CCDC88A4    | 6.79E-172 | 1.841747449 | 0.818 | 0.173 |
| SEL1L34     | 1.82E-171 | 2.376994217 | 0.967 | 0.313 |
| TPD523      | 2.93E-171 | 2.523612377 | 0.955 | 0.302 |
| CD405       | 8.32E-171 | 1.323821595 | 0.744 | 0.137 |
| MACROD2     | 1.52E-169 | 1.384240299 | 0.438 | 0.048 |
| CD79A4      | 2.85E-166 | 2.035278933 | 0.95  | 0.246 |
| FCRL12      | 5.72E-166 | 1.27875627  | 0.74  | 0.126 |
| USP6NL4     | 7.34E-166 | 1.473870593 | 0.719 | 0.132 |
| STAG31      | 3.14E-165 | 1.462390127 | 0.616 | 0.095 |
| CD180       | 3.40E-165 | 0.877663695 | 0.446 | 0.052 |
| PLCG25      | 1.67E-164 | 2.123305838 | 0.971 | 0.303 |
| DEF8        | 5.46E-161 | 1.177584765 | 0.595 | 0.095 |
| BLNK2       | 8.13E-161 | 1.174993788 | 0.624 | 0.099 |
| SLC1A1      | 4.97E-160 | 0.78704009  | 0.372 | 0.036 |
| MBD42       | 1.82E-159 | 1.572013344 | 0.876 | 0.222 |
| CLIC44      | 1.54E-157 | 1.791616092 | 0.88  | 0.215 |
| HLA-DMB5    | 2.39E-157 | 1.717520725 | 0.917 | 0.239 |
| SLC30A4     | 1.18E-156 | 0.74275885  | 0.322 | 0.029 |
| SYVN1       | 3.44E-155 | 0.848742248 | 0.504 | 0.068 |
| AC012236.11 | 8.25E-155 | 0.682447906 | 0.293 | 0.024 |
| ZFAND4      | 3.44E-154 | 1.121845199 | 0.558 | 0.083 |
| LINC02340   | 4.22E-154 | 0.823929185 | 0.388 | 0.041 |
| ANKRD13A3   | 5.67E-152 | 1.719326899 | 0.872 | 0.242 |
| ANKRD33B3   | 1.01E-151 | 1.384408618 | 0.727 | 0.142 |
| OSBPL104    | 1.69E-151 | 1.316720925 | 0.723 | 0.133 |
| CTPS2       | 2.38E-151 | 0.945680767 | 0.455 | 0.057 |
| KANK1       | 3.26E-151 | 1.324757343 | 0.442 | 0.055 |
| AC022182.1  | 1.04E-150 | 1.167297493 | 0.475 | 0.062 |
| HLA-DOB2    | 1.86E-150 | 0.969117399 | 0.517 | 0.072 |
| RASL11A     | 2.27E-150 | 0.933926949 | 0.413 | 0.047 |
| ST6GAL13    | 1.39E-149 | 2.182246998 | 0.988 | 0.362 |
| BRI3BP      | 2.18E-148 | 1.035911753 | 0.537 | 0.081 |
| TUBB3       | 1.04E-147 | 0.736099169 | 0.31  | 0.028 |
| MAPK10      | 1.70E-147 | 1.636908651 | 0.409 | 0.048 |
| EEPD12      | 9.98E-147 | 1.8649365   | 0.599 | 0.107 |
| SMIM201     | 1.20E-146 | 1.219442523 | 0.711 | 0.145 |

|            |           |             |       |       |
|------------|-----------|-------------|-------|-------|
| WDFY44     | 4.25E-145 | 1.413854538 | 0.793 | 0.178 |
| MARCKSL14  | 1.79E-144 | 2.186950876 | 0.884 | 0.266 |
| MCTP23     | 5.72E-144 | 1.448463732 | 0.872 | 0.218 |
| EAF22      | 7.02E-144 | 1.279372307 | 0.715 | 0.146 |
| LILRB12    | 2.16E-142 | 0.955534167 | 0.521 | 0.08  |
| KNL1       | 6.64E-142 | 0.76146636  | 0.368 | 0.04  |
| SPRED22    | 1.22E-140 | 1.483241016 | 0.669 | 0.131 |
| SNX221     | 1.37E-140 | 0.490412912 | 0.256 | 0.02  |
| COL9A3     | 7.24E-138 | 0.966701289 | 0.314 | 0.031 |
| AFF33      | 8.96E-138 | 1.808897011 | 0.959 | 0.263 |
| TMEM1562   | 6.49E-137 | 2.044454843 | 0.921 | 0.294 |
| CDK191     | 1.99E-134 | 1.719406267 | 0.793 | 0.201 |
| TNFRSF13C3 | 2.78E-134 | 1.245492249 | 0.831 | 0.186 |
| ZNF775     | 8.07E-133 | 0.589235628 | 0.322 | 0.033 |
| BFSP2      | 8.78E-133 | 0.841987544 | 0.492 | 0.072 |
| GEN1       | 6.56E-132 | 0.914194161 | 0.483 | 0.071 |
| EHMT13     | 9.38E-132 | 2.339221843 | 0.975 | 0.476 |
| UBE2J11    | 1.51E-131 | 1.654616624 | 0.909 | 0.312 |
| SAMD121    | 2.62E-131 | 1.308449968 | 0.785 | 0.179 |
| SPAG16     | 3.88E-130 | 1.115652452 | 0.438 | 0.061 |
| RUBCNL3    | 7.60E-130 | 1.196133711 | 0.736 | 0.153 |
| C12orf741  | 1.77E-129 | 0.741152366 | 0.372 | 0.043 |
| SLC15A41   | 1.07E-128 | 1.077366345 | 0.727 | 0.158 |
| PRAG1      | 4.92E-128 | 1.304000742 | 0.645 | 0.127 |
| BACH22     | 5.75E-128 | 2.601339518 | 0.988 | 0.504 |
| KCNK12     | 8.13E-128 | 0.486103197 | 0.256 | 0.022 |
| LPP1       | 9.88E-128 | 3.091268855 | 0.979 | 0.578 |
| DAAM11     | 1.38E-124 | 1.496093727 | 0.773 | 0.195 |
| PARP13     | 1.49E-124 | 1.827452392 | 0.901 | 0.353 |
| LAT25      | 1.82E-123 | 1.181299305 | 0.74  | 0.174 |
| GRAMD1C    | 2.61E-123 | 0.905137433 | 0.43  | 0.059 |
| HVCN12     | 1.97E-122 | 1.008379599 | 0.653 | 0.131 |
| TXNDC51    | 1.68E-121 | 0.955145714 | 0.632 | 0.126 |
| TMEM131L2  | 2.71E-121 | 2.042940283 | 0.946 | 0.388 |
| AC012368.1 | 3.06E-121 | 1.029712718 | 0.455 | 0.069 |
| RASGRP34   | 6.73E-121 | 1.101334891 | 0.694 | 0.153 |
| HMGA11     | 9.32E-121 | 1.302216333 | 0.793 | 0.219 |
| DNASE1     | 2.25E-120 | 0.739297519 | 0.409 | 0.055 |
| STX74      | 3.88E-120 | 1.360320542 | 0.847 | 0.245 |
| DPH7       | 1.78E-119 | 0.829951111 | 0.459 | 0.07  |
| UGT8       | 2.38E-119 | 0.551022767 | 0.339 | 0.039 |
| NEK63      | 1.96E-118 | 0.95428176  | 0.512 | 0.089 |
| SNX85      | 2.64E-118 | 1.29315692  | 0.81  | 0.213 |



|             |           |             |       |       |
|-------------|-----------|-------------|-------|-------|
| CDCA7L1     | 3.44E-118 | 0.676689498 | 0.459 | 0.069 |
| PKHD1L1     | 1.52E-117 | 0.455283237 | 0.26  | 0.024 |
| TCEA13      | 2.64E-117 | 1.91128085  | 0.942 | 0.492 |
| MICAL33     | 5.90E-117 | 1.253455281 | 0.748 | 0.182 |
| GPR181      | 7.01E-117 | 1.350702152 | 0.674 | 0.147 |
| AC119396.12 | 2.03E-116 | 1.185636522 | 0.603 | 0.117 |
| ABR2        | 2.57E-116 | 1.771005904 | 0.864 | 0.264 |
| AC025569.1  | 2.25E-114 | 0.714660761 | 0.264 | 0.026 |
| TLR10       | 3.32E-114 | 0.56727973  | 0.285 | 0.03  |
| KLHL65      | 3.33E-114 | 1.720377509 | 0.839 | 0.27  |
| RRAS21      | 3.75E-114 | 1.301260983 | 0.769 | 0.194 |
| SCARB12     | 1.12E-113 | 0.934284745 | 0.479 | 0.081 |
| SSBP23      | 1.29E-113 | 1.556058243 | 0.905 | 0.294 |
| ZBTB20-AS5  | 1.68E-113 | 1.034490555 | 0.504 | 0.086 |
| SPIB2       | 2.92E-113 | 0.707397532 | 0.492 | 0.079 |
| FAM3C2      | 6.71E-111 | 1.645977404 | 0.826 | 0.265 |
| SYK5        | 1.65E-110 | 1.256388    | 0.723 | 0.188 |
| QSOX2       | 1.98E-110 | 0.675596286 | 0.463 | 0.074 |
| NCOA33      | 1.15E-109 | 2.351473128 | 0.971 | 0.546 |
| LYN6        | 2.72E-109 | 1.552253746 | 0.979 | 0.368 |
| HLA-DMA5    | 5.72E-109 | 1.609583916 | 0.926 | 0.363 |
| SGPP1       | 3.77E-108 | 1.268059174 | 0.669 | 0.158 |
| RPRD1B      | 9.50E-108 | 1.414807643 | 0.698 | 0.183 |
| CD382       | 1.08E-107 | 1.255175347 | 0.707 | 0.176 |
| ST142       | 2.16E-107 | 0.849663965 | 0.45  | 0.076 |
| PLEKHG13    | 3.91E-107 | 1.289992335 | 0.876 | 0.253 |
| RAD17       | 5.45E-107 | 0.861936646 | 0.517 | 0.096 |
| LIMD23      | 7.23E-107 | 1.634131499 | 0.95  | 0.415 |
| RMI2        | 5.01E-106 | 0.76744368  | 0.438 | 0.071 |
| ZNF581      | 1.59E-105 | 0.838328505 | 0.521 | 0.099 |
| MEF2C-AS2   | 2.87E-105 | 0.468083972 | 0.264 | 0.027 |
| AIM2        | 2.92E-105 | 0.91746121  | 0.554 | 0.108 |
| CCDC69      | 5.23E-105 | 1.193793956 | 0.773 | 0.226 |
| NCF13       | 8.18E-105 | 1.128534014 | 0.769 | 0.211 |
| TCF44       | 1.36E-104 | 1.590366199 | 0.855 | 0.266 |
| KLHL52      | 2.05E-104 | 1.677373076 | 0.872 | 0.305 |
| FAM111B     | 2.66E-104 | 0.668879731 | 0.277 | 0.03  |
| LINC01215   | 8.98E-104 | 0.642969983 | 0.368 | 0.051 |
| HDAC71      | 2.69E-103 | 1.049612712 | 0.632 | 0.144 |
| RFC3        | 4.78E-103 | 0.70932625  | 0.326 | 0.042 |
| XKR62       | 6.92E-103 | 1.311869294 | 0.839 | 0.267 |
| RAB30-DT    | 1.60E-102 | 1.083499403 | 0.616 | 0.141 |
| HMCES1      | 2.19E-102 | 1.275068257 | 0.723 | 0.199 |

|            |           |             |       |       |
|------------|-----------|-------------|-------|-------|
| ZNF3181    | 2.45E-101 | 0.738102206 | 0.475 | 0.083 |
| JSRP11     | 2.63E-101 | 0.753995197 | 0.529 | 0.099 |
| RFTN12     | 3.29E-101 | 1.757961279 | 0.975 | 0.574 |
| LY865      | 1.06E-100 | 0.956456074 | 0.649 | 0.152 |
| TEX9       | 1.63E-100 | 0.612396266 | 0.355 | 0.049 |
| MAML32     | 1.66E-100 | 2.49016685  | 0.698 | 0.199 |
| BCAR32     | 2.72E-100 | 1.050592522 | 0.479 | 0.09  |
| HMGN14     | 2.95E-100 | 1.859885253 | 0.963 | 0.598 |
| APBB2      | 4.82E-100 | 0.588709651 | 0.298 | 0.036 |
| AMFR       | 1.66E-99  | 1.033411357 | 0.574 | 0.124 |
| CPNE31     | 6.58E-99  | 1.756509168 | 0.723 | 0.223 |
| SHISA8     | 1.09E-98  | 0.525900114 | 0.269 | 0.03  |
| IL4R2      | 1.50E-98  | 1.335564311 | 0.839 | 0.28  |
| TMEM1313   | 1.63E-96  | 1.622251064 | 0.93  | 0.422 |
| ITSN23     | 2.70E-96  | 1.48242319  | 0.975 | 0.552 |
| ACADM      | 4.38E-96  | 0.96208734  | 0.645 | 0.16  |
| NLK        | 6.88E-96  | 1.417082626 | 0.748 | 0.219 |
| GGA23      | 7.89E-96  | 1.436941907 | 0.905 | 0.369 |
| PAWR1      | 1.43E-95  | 0.686664548 | 0.45  | 0.077 |
| SEC14L11   | 1.53E-95  | 1.488627316 | 0.893 | 0.387 |
| STRBP3     | 1.84E-95  | 1.245120962 | 0.843 | 0.277 |
| SGCE       | 1.91E-95  | 0.820511148 | 0.434 | 0.074 |
| TEC1       | 3.66E-95  | 0.957534839 | 0.483 | 0.094 |
| KCNQ51     | 5.62E-95  | 1.034732733 | 0.537 | 0.108 |
| AC087500.1 | 2.30E-94  | 0.540078161 | 0.326 | 0.044 |
| CYB561A32  | 3.84E-94  | 0.903726769 | 0.554 | 0.121 |
| ACTG12     | 5.25E-94  | 1.931762644 | 0.979 | 0.838 |
| TNFRSF171  | 7.31E-94  | 0.476477856 | 0.26  | 0.03  |
| FAM76B1    | 7.74E-94  | 1.269344288 | 0.707 | 0.197 |
| SMARCB12   | 2.30E-93  | 1.010809589 | 0.711 | 0.197 |
| LAPTM56    | 4.35E-93  | 1.471500242 | 0.983 | 0.705 |
| BRWD1      | 5.62E-93  | 1.438721499 | 0.872 | 0.338 |
| LINC023972 | 1.86E-92  | 0.669363278 | 0.492 | 0.091 |
| MAP4K45    | 4.43E-92  | 1.652396269 | 0.979 | 0.549 |
| USP53      | 5.31E-92  | 1.815229048 | 0.707 | 0.217 |
| DAPP13     | 3.58E-91  | 1.205295944 | 0.826 | 0.287 |
| NUP882     | 2.05E-90  | 1.022135281 | 0.723 | 0.196 |
| LBR1       | 2.88E-90  | 1.25604903  | 0.798 | 0.281 |
| POLD44     | 5.72E-90  | 1.394803961 | 0.88  | 0.369 |
| DOK3       | 1.79E-89  | 0.511400032 | 0.376 | 0.061 |
| USP342     | 4.31E-89  | 1.762349008 | 0.95  | 0.667 |
| GNG75      | 7.79E-89  | 1.304862358 | 0.884 | 0.295 |
| TSPAN132   | 2.60E-88  | 0.633023311 | 0.492 | 0.098 |

|             |          |             |       |       |
|-------------|----------|-------------|-------|-------|
| TMEM1232    | 3.87E-87 | 1.561052943 | 0.946 | 0.51  |
| GMDS1       | 6.84E-87 | 2.721463148 | 0.868 | 0.448 |
| EVC2        | 1.01E-86 | 0.868338955 | 0.252 | 0.031 |
| TCF3        | 1.38E-85 | 0.770443027 | 0.475 | 0.098 |
| RHOH1       | 5.05E-85 | 1.56823601  | 0.979 | 0.664 |
| BICD13      | 5.30E-85 | 1.105363055 | 0.76  | 0.235 |
| TSPAN333    | 1.04E-84 | 0.865944457 | 0.496 | 0.108 |
| DGKD2       | 3.80E-84 | 1.303260944 | 0.764 | 0.254 |
| MYO1D3      | 4.40E-84 | 1.118248165 | 0.715 | 0.212 |
| IFT573      | 6.48E-84 | 1.234053157 | 0.711 | 0.221 |
| CPB2-AS1    | 1.39E-83 | 1.033103162 | 0.521 | 0.116 |
| LYPLA11     | 2.05E-83 | 1.174741225 | 0.76  | 0.259 |
| MBNL21      | 5.45E-83 | 1.692344391 | 0.917 | 0.436 |
| BANK14      | 7.77E-83 | 0.514440704 | 0.818 | 0.212 |
| IMP4        | 1.31E-82 | 0.899473322 | 0.661 | 0.183 |
| BPNT1       | 4.62E-82 | 0.489755625 | 0.298 | 0.042 |
| LHFPL22     | 1.57E-81 | 0.925104878 | 0.442 | 0.088 |
| CD863       | 1.68E-81 | 0.845027386 | 0.612 | 0.149 |
| SORL12      | 2.45E-81 | 1.134690533 | 0.781 | 0.258 |
| KLHL29      | 9.52E-81 | 0.573677266 | 0.281 | 0.038 |
| SERF24      | 2.23E-80 | 1.335445189 | 0.988 | 0.859 |
| PXK1        | 2.44E-80 | 0.956643563 | 0.686 | 0.201 |
| ZCCHC72     | 4.33E-80 | 1.420708465 | 0.942 | 0.493 |
| LRCH32      | 8.01E-80 | 1.240698629 | 0.843 | 0.323 |
| AL390957.1  | 2.27E-79 | 0.962386603 | 0.657 | 0.186 |
| PIK3AP14    | 4.17E-79 | 0.893273239 | 0.723 | 0.212 |
| WDR76       | 7.76E-79 | 0.567044341 | 0.306 | 0.046 |
| SYPL12      | 1.77E-78 | 0.972713259 | 0.736 | 0.23  |
| AC079921.11 | 7.46E-78 | 0.810412892 | 0.479 | 0.103 |
| HLA-DQA15   | 2.04E-77 | 1.387887522 | 0.946 | 0.413 |
| LY86-AS1    | 4.59E-77 | 0.611020027 | 0.322 | 0.051 |
| PHF6        | 6.95E-77 | 1.10344324  | 0.64  | 0.184 |
| GDI26       | 1.65E-76 | 1.094432473 | 0.905 | 0.428 |
| C16orf741   | 2.42E-76 | 0.786112385 | 0.384 | 0.072 |
| DENND5B4    | 3.45E-76 | 0.801727047 | 0.529 | 0.124 |
| PPP1CC1     | 1.59E-74 | 1.01175925  | 0.826 | 0.322 |
| 14-Mar      | 7.54E-74 | 0.923751673 | 0.694 | 0.206 |
| GRHPR       | 1.57E-73 | 0.811323765 | 0.595 | 0.164 |
| TOX4        | 1.70E-73 | 1.244270383 | 0.909 | 0.373 |
| POU2F23     | 2.42E-73 | 1.09417653  | 0.756 | 0.266 |
| FCRL2       | 5.24E-73 | 0.556843676 | 0.281 | 0.042 |
| RBM62       | 6.46E-73 | 1.383981412 | 0.917 | 0.508 |
| CCNG21      | 7.66E-73 | 0.841864022 | 0.541 | 0.135 |

|           |          |             |       |       |
|-----------|----------|-------------|-------|-------|
| RRM2B1    | 9.04E-73 | 0.877782621 | 0.566 | 0.15  |
| LCP14     | 9.25E-73 | 1.321257406 | 0.963 | 0.649 |
| RBM382    | 1.56E-72 | 1.129664071 | 0.851 | 0.339 |
| CD745     | 3.57E-72 | 1.439587815 | 0.988 | 0.721 |
| RHEX3     | 4.23E-72 | 0.877244917 | 0.417 | 0.086 |
| SLC4A8    | 7.30E-72 | 0.487312322 | 0.293 | 0.046 |
| SPI13     | 3.08E-71 | 0.576192418 | 0.55  | 0.134 |
| SNX294    | 3.70E-71 | 1.085322675 | 0.884 | 0.362 |
| CLEC17A1  | 1.27E-70 | 0.537818754 | 0.31  | 0.051 |
| UBE2R22   | 1.61E-70 | 1.264050528 | 0.843 | 0.385 |
| HS2ST1    | 1.95E-70 | 1.212328829 | 0.649 | 0.202 |
| SLCO3A12  | 2.67E-70 | 1.181990495 | 0.661 | 0.209 |
| CTSH4     | 3.72E-70 | 0.900444253 | 0.719 | 0.23  |
| ARHGAP244 | 4.00E-69 | 0.472468495 | 0.752 | 0.215 |
| SH2B2     | 6.12E-69 | 0.473320409 | 0.326 | 0.058 |
| ZNF804A2  | 7.35E-69 | 1.989141341 | 0.368 | 0.077 |
| CLIP22    | 7.62E-69 | 0.822506427 | 0.376 | 0.076 |
| NEDD4L2   | 1.18E-68 | 1.106248142 | 0.442 | 0.104 |
| RABGAP1L2 | 1.67E-68 | 1.367966423 | 0.967 | 0.793 |
| LARGE14   | 1.90E-68 | 1.039280685 | 0.583 | 0.157 |
| STMN11    | 2.44E-68 | 1.373432014 | 0.566 | 0.165 |
| KATNAL1   | 2.75E-68 | 0.597371921 | 0.426 | 0.091 |
| SLC25A53  | 5.06E-68 | 1.269719199 | 0.884 | 0.483 |
| MAP4K2    | 5.78E-68 | 0.709912107 | 0.384 | 0.077 |
| OTUD15    | 9.97E-68 | 1.122772592 | 0.669 | 0.219 |
| SLC9A72   | 1.08E-67 | 0.781522765 | 0.545 | 0.142 |
| MRPS27    | 1.27E-67 | 0.832241758 | 0.529 | 0.138 |
| ORAI23    | 2.19E-67 | 0.843895103 | 0.674 | 0.21  |
| PPP2CA1   | 2.29E-67 | 1.263930066 | 0.901 | 0.474 |
| MEF2A4    | 2.64E-67 | 1.207432438 | 0.876 | 0.415 |
| CORO1A3   | 3.26E-67 | 1.29612293  | 0.95  | 0.618 |
| CD724     | 4.76E-67 | 0.799061241 | 0.579 | 0.162 |
| PIK3C2B   | 7.56E-67 | 0.546995599 | 0.36  | 0.069 |
| DEGS1     | 2.23E-66 | 1.209542829 | 0.657 | 0.234 |
| NIBAN32   | 2.46E-66 | 0.629954933 | 0.421 | 0.089 |
| CYBB4     | 2.62E-66 | 0.638578832 | 0.665 | 0.189 |
| PAG1      | 3.79E-66 | 1.408856559 | 0.864 | 0.436 |
| DENND34   | 3.94E-66 | 0.870904269 | 0.599 | 0.177 |
| UVRAG3    | 4.40E-66 | 1.12721285  | 0.888 | 0.415 |
| CD374     | 6.42E-66 | 1.27506068  | 0.959 | 0.663 |
| HLA-DRA5  | 1.34E-65 | 1.197266527 | 0.983 | 0.539 |
| HLA-DOA3  | 1.62E-65 | 0.551106405 | 0.405 | 0.088 |
| RUBCN3    | 2.31E-65 | 0.991396914 | 0.736 | 0.262 |

|            |          |             |       |       |
|------------|----------|-------------|-------|-------|
| MSI21      | 3.00E-65 | 1.633421342 | 0.938 | 0.557 |
| SH3KBP11   | 3.04E-65 | 1.39025253  | 0.95  | 0.657 |
| USP123     | 3.39E-65 | 1.206896979 | 0.86  | 0.389 |
| ZNF821     | 4.81E-65 | 0.820321304 | 0.504 | 0.131 |
| MED12L     | 5.64E-65 | 0.564254292 | 0.298 | 0.051 |
| ANP32B2    | 6.09E-65 | 1.258592971 | 0.909 | 0.567 |
| EPS151     | 9.02E-65 | 1.169667618 | 0.893 | 0.453 |
| VGLL4      | 1.30E-64 | 0.819283274 | 0.574 | 0.166 |
| MFHAS12    | 1.90E-64 | 1.008677213 | 0.678 | 0.22  |
| HELLS      | 2.98E-64 | 0.79054488  | 0.455 | 0.107 |
| FAM102A2   | 4.32E-64 | 1.123807987 | 0.793 | 0.313 |
| DHFR       | 6.34E-64 | 0.613548314 | 0.302 | 0.054 |
| CAMK2D2    | 1.11E-63 | 1.080427355 | 0.938 | 0.464 |
| ACTB4      | 1.53E-63 | 1.163723629 | 0.979 | 0.889 |
| MYO9A1     | 2.72E-63 | 0.878553093 | 0.665 | 0.215 |
| PRKD31     | 2.85E-63 | 0.830675264 | 0.603 | 0.182 |
| UBE2E25    | 3.07E-63 | 1.004817958 | 0.748 | 0.255 |
| PTPN181    | 7.99E-63 | 0.84356936  | 0.558 | 0.167 |
| C12orf49   | 9.48E-63 | 0.714939408 | 0.467 | 0.118 |
| CCDC1383   | 9.52E-63 | 0.880508132 | 0.698 | 0.231 |
| HLA-DRB55  | 1.30E-62 | 1.297350394 | 0.678 | 0.241 |
| INPP5D2    | 1.75E-62 | 1.162718382 | 0.938 | 0.496 |
| DNMT1      | 1.93E-62 | 1.243935059 | 0.694 | 0.261 |
| ATP5MG1    | 3.98E-62 | 1.43773586  | 0.959 | 0.755 |
| AL592429.2 | 4.52E-62 | 0.914618922 | 0.372 | 0.08  |
| FBXO30     | 5.04E-62 | 0.540856801 | 0.326 | 0.062 |
| TRAK15     | 5.17E-62 | 0.868370411 | 0.806 | 0.307 |
| CDK132     | 5.21E-61 | 1.431382502 | 0.884 | 0.506 |
| CENPM      | 5.34E-61 | 0.66118775  | 0.471 | 0.118 |
| BLOC1S61   | 6.20E-61 | 0.99136186  | 0.736 | 0.291 |
| RB14       | 1.50E-60 | 1.11822022  | 0.909 | 0.468 |
| TRIM382    | 2.04E-60 | 1.277258627 | 0.773 | 0.331 |
| ZNF827     | 2.09E-60 | 0.64427481  | 0.45  | 0.107 |
| SIPA1L33   | 4.53E-60 | 0.887854496 | 0.764 | 0.279 |
| PLEKHF21   | 6.14E-60 | 0.831472327 | 0.579 | 0.182 |
| TKT3       | 6.39E-60 | 0.970027637 | 0.785 | 0.317 |
| THRB1      | 9.89E-60 | 0.966817409 | 0.318 | 0.061 |
| TMEM2432   | 2.29E-59 | 0.944038981 | 0.868 | 0.386 |
| OTULIN2    | 2.97E-59 | 0.986377012 | 0.798 | 0.328 |
| BMP2K5     | 3.80E-59 | 0.758628475 | 0.661 | 0.218 |
| CENPU1     | 3.81E-59 | 0.407565722 | 0.326 | 0.065 |
| SCRN1      | 1.87E-58 | 0.444418776 | 0.293 | 0.055 |
| HMGB12     | 2.73E-58 | 1.216535187 | 0.992 | 0.859 |

|           |          |             |       |       |
|-----------|----------|-------------|-------|-------|
| SNX30     | 4.15E-58 | 0.570703322 | 0.376 | 0.084 |
| LINC01184 | 4.52E-58 | 0.577712192 | 0.471 | 0.121 |
| METAP21   | 5.69E-58 | 1.446156486 | 0.785 | 0.404 |
| GCHFR     | 6.80E-58 | 0.777178758 | 0.603 | 0.188 |
| ATP2A32   | 6.88E-58 | 0.791340225 | 0.669 | 0.228 |
| FCRL3     | 7.45E-58 | 0.610919505 | 0.339 | 0.069 |
| BCL62     | 7.95E-58 | 0.741474008 | 0.649 | 0.221 |
| CASD11    | 9.57E-58 | 0.704541625 | 0.583 | 0.173 |
| HDAC11    | 1.13E-57 | 0.767808329 | 0.649 | 0.221 |
| SYNE13    | 2.31E-57 | 1.020385391 | 0.785 | 0.324 |
| PLEKHJ1   | 4.27E-57 | 0.690309744 | 0.583 | 0.18  |
| GIT21     | 4.45E-57 | 0.926402178 | 0.669 | 0.239 |
| EZR3      | 1.06E-56 | 0.998777973 | 0.988 | 0.808 |
| TRIO6     | 1.23E-56 | 0.936357601 | 0.748 | 0.283 |
| BCL2L114  | 1.28E-56 | 0.847903723 | 0.843 | 0.361 |
| BTK4      | 1.33E-56 | 0.619637352 | 0.488 | 0.133 |
| SKAP25    | 1.68E-56 | 0.867746198 | 0.744 | 0.293 |
| CUX12     | 2.20E-56 | 1.033505001 | 0.851 | 0.386 |
| BPTF2     | 2.28E-56 | 1.288668519 | 0.93  | 0.632 |
| HSH2D3    | 4.04E-56 | 0.817291551 | 0.612 | 0.197 |
| PTTG11    | 5.18E-56 | 0.856172845 | 0.545 | 0.163 |
| KCNMB4    | 5.42E-56 | 0.545582646 | 0.277 | 0.05  |
| PM20D2    | 6.48E-56 | 0.554613236 | 0.285 | 0.053 |
| GIHCG     | 7.82E-56 | 0.393525511 | 0.252 | 0.043 |
| CCDC126   | 1.18E-55 | 0.526506589 | 0.347 | 0.074 |
| SNED12    | 1.47E-55 | 0.749120564 | 0.504 | 0.138 |
| MDM41     | 2.47E-55 | 0.895014642 | 0.826 | 0.377 |
| HMG21     | 3.08E-55 | 1.695342502 | 0.888 | 0.548 |
| SLC35E3   | 6.12E-55 | 0.763010182 | 0.463 | 0.129 |
| RHBDD13   | 8.91E-55 | 0.925559645 | 0.669 | 0.242 |
| RAP1B1    | 1.01E-54 | 0.987633898 | 0.975 | 0.773 |
| PIK3CG1   | 1.11E-54 | 0.847067409 | 0.525 | 0.165 |
| LONRF1    | 1.13E-54 | 0.555057314 | 0.347 | 0.077 |
| CD533     | 1.24E-54 | 1.051719919 | 0.934 | 0.711 |
| RABEP21   | 1.34E-54 | 0.597335732 | 0.492 | 0.133 |
| AP1S33    | 1.51E-54 | 0.720069674 | 0.463 | 0.123 |
| ARPC24    | 1.59E-54 | 1.047878255 | 0.959 | 0.782 |
| HLA-DQA25 | 2.12E-54 | 0.986917032 | 0.723 | 0.281 |
| LY93      | 2.14E-54 | 0.640759645 | 0.711 | 0.244 |
| SUSD3     | 2.36E-54 | 0.860626183 | 0.554 | 0.172 |
| EPS15L1   | 2.50E-54 | 0.801631972 | 0.537 | 0.163 |
| TMEM19    | 2.92E-54 | 0.721904503 | 0.339 | 0.076 |
| USPL12    | 5.37E-54 | 0.907892785 | 0.773 | 0.323 |

|           |          |             |       |       |
|-----------|----------|-------------|-------|-------|
| UCP24     | 7.47E-54 | 1.001112361 | 0.855 | 0.413 |
| SETDB2    | 1.42E-53 | 0.839033906 | 0.574 | 0.189 |
| MIS18BP12 | 1.62E-53 | 1.102387262 | 0.752 | 0.318 |
| TMA16     | 1.91E-53 | 0.543821196 | 0.521 | 0.15  |
| UBR7      | 2.35E-53 | 0.618921879 | 0.372 | 0.088 |
| MTMR12    | 3.00E-53 | 0.720235389 | 0.545 | 0.167 |
| TSBP1-AS1 | 4.66E-53 | 0.431724875 | 0.256 | 0.045 |
| MTMR14    | 6.92E-53 | 0.716135367 | 0.587 | 0.195 |
| CARD112   | 1.08E-52 | 0.946686097 | 0.847 | 0.386 |
| PRDX63    | 1.08E-52 | 1.363013513 | 0.818 | 0.428 |
| NDUFAF63  | 1.14E-52 | 0.930946087 | 0.764 | 0.313 |
| P2RY82    | 1.63E-52 | 0.999106677 | 0.793 | 0.336 |
| HLA-DQB15 | 1.69E-52 | 1.141105394 | 0.884 | 0.427 |
| MSH6      | 2.78E-52 | 0.708269286 | 0.459 | 0.127 |
| SLC49A42  | 4.74E-52 | 1.25840279  | 0.612 | 0.221 |
| EIF2AK33  | 6.18E-52 | 1.011986999 | 0.806 | 0.364 |
| ZFAND63   | 6.61E-52 | 0.909682186 | 0.909 | 0.5   |
| BFSP2-AS1 | 7.72E-52 | 0.350883499 | 0.256 | 0.045 |
| LPIN12    | 8.77E-52 | 1.074282889 | 0.793 | 0.361 |
| SLC38A9   | 4.73E-51 | 0.732907172 | 0.421 | 0.112 |
| FAM49A6   | 1.17E-50 | 0.953101073 | 0.723 | 0.277 |
| SLC23A2   | 1.56E-50 | 0.753127719 | 0.537 | 0.17  |
| VEZT      | 3.27E-50 | 0.967989037 | 0.752 | 0.321 |
| NCOA72    | 3.34E-50 | 1.101994273 | 0.707 | 0.294 |
| RALGPS24  | 5.78E-50 | 0.651217796 | 0.678 | 0.236 |
| EXT13     | 8.41E-50 | 1.316315671 | 0.789 | 0.364 |
| OGA1      | 8.91E-50 | 0.94857555  | 0.897 | 0.491 |
| FADS3     | 1.16E-49 | 0.429985359 | 0.372 | 0.089 |
| TPCN1     | 1.25E-49 | 0.485392106 | 0.347 | 0.082 |
| WASHC42   | 1.85E-49 | 0.917659582 | 0.74  | 0.324 |
| ODC13     | 2.52E-49 | 0.835654467 | 0.847 | 0.428 |
| LAMTOR52  | 3.04E-49 | 0.882290137 | 0.793 | 0.391 |
| RAPGEF16  | 3.18E-49 | 1.255058704 | 0.942 | 0.607 |
| HLA-DRB15 | 3.27E-49 | 0.93713027  | 0.971 | 0.574 |
| CCNI3     | 3.46E-49 | 0.887914993 | 0.955 | 0.735 |
| CSK1      | 5.65E-49 | 0.775660037 | 0.674 | 0.261 |
| DMXL13    | 5.81E-49 | 1.018794218 | 0.731 | 0.312 |
| TACC13    | 7.57E-49 | 0.884225358 | 0.831 | 0.421 |
| MMD       | 8.59E-49 | 0.554318468 | 0.314 | 0.071 |
| MRPS28    | 1.23E-48 | 1.228327206 | 0.583 | 0.218 |
| CUL33     | 1.33E-48 | 0.97438981  | 0.95  | 0.64  |
| SCPEP14   | 1.33E-48 | 0.639497182 | 0.517 | 0.163 |
| PLIN33    | 1.63E-48 | 0.583492749 | 0.459 | 0.136 |

|             |          |             |       |       |
|-------------|----------|-------------|-------|-------|
| UGCG1       | 2.62E-48 | 0.771498225 | 0.74  | 0.301 |
| RGS16       | 5.81E-48 | 0.52641891  | 0.421 | 0.113 |
| SRSF91      | 7.14E-48 | 1.009883404 | 0.806 | 0.426 |
| LSM10       | 7.53E-48 | 0.925056125 | 0.587 | 0.217 |
| PRKCE3      | 7.96E-48 | 0.790230882 | 0.864 | 0.403 |
| GPR160      | 8.74E-48 | 0.459375352 | 0.331 | 0.077 |
| SNRNP251    | 1.12E-47 | 0.560359026 | 0.409 | 0.113 |
| FCRL51      | 2.68E-47 | 0.483461305 | 0.26  | 0.052 |
| CDK145      | 2.92E-47 | 0.77309397  | 0.773 | 0.32  |
| RCSD12      | 4.03E-47 | 1.01224864  | 0.777 | 0.367 |
| FCHSD25     | 6.07E-47 | 0.825820283 | 0.868 | 0.425 |
| RBBP4       | 9.67E-47 | 0.77355667  | 0.698 | 0.299 |
| NANS1       | 1.09E-46 | 0.79139319  | 0.669 | 0.276 |
| RAB3GAP2    | 1.18E-46 | 0.806227127 | 0.678 | 0.266 |
| DCUN1D1     | 1.61E-46 | 0.68451832  | 0.533 | 0.176 |
| GRK35       | 1.77E-46 | 0.747107331 | 0.55  | 0.189 |
| TSC1        | 1.93E-46 | 0.470288113 | 0.368 | 0.092 |
| USP7        | 1.95E-46 | 0.739275485 | 0.764 | 0.338 |
| C12orf752   | 2.22E-46 | 0.55733501  | 0.517 | 0.159 |
| CERS4       | 3.18E-46 | 0.494592063 | 0.446 | 0.125 |
| RNF144B5    | 4.43E-46 | 0.445622196 | 0.554 | 0.174 |
| SNX52       | 4.73E-46 | 0.758962479 | 0.661 | 0.268 |
| ADGRG5      | 7.86E-46 | 0.347939743 | 0.269 | 0.054 |
| NIN3        | 8.07E-46 | 1.033351499 | 0.769 | 0.363 |
| CCDC62      | 1.09E-45 | 0.754180515 | 0.806 | 0.364 |
| CXXC51      | 1.19E-45 | 0.577547251 | 0.372 | 0.099 |
| EIPR1       | 1.49E-45 | 0.526608093 | 0.488 | 0.148 |
| XRCC4       | 1.59E-45 | 0.632178977 | 0.401 | 0.112 |
| MCOLN23     | 2.24E-45 | 0.602212224 | 0.587 | 0.197 |
| ENTPD4      | 2.74E-45 | 0.633206082 | 0.554 | 0.19  |
| MCM51       | 2.90E-45 | 0.595267017 | 0.409 | 0.115 |
| PVT14       | 3.42E-45 | 0.794936712 | 0.826 | 0.396 |
| KBTBD81     | 3.79E-45 | 0.461491932 | 0.36  | 0.092 |
| AC025164.11 | 6.61E-45 | 0.797725923 | 0.595 | 0.215 |
| ACTR35      | 7.83E-45 | 0.80834146  | 0.934 | 0.595 |
| CHMP7       | 1.16E-44 | 0.614648535 | 0.426 | 0.123 |
| PARP111     | 2.00E-44 | 0.646781879 | 0.426 | 0.123 |
| RABGAP11    | 3.04E-44 | 0.693974175 | 0.678 | 0.268 |
| MAP1LC3B1   | 3.99E-44 | 0.963857288 | 0.921 | 0.629 |
| FBXO10      | 4.11E-44 | 0.503651419 | 0.393 | 0.106 |
| ATM3        | 4.16E-44 | 0.958763679 | 0.868 | 0.488 |
| ITPKB2      | 4.86E-44 | 0.733250926 | 0.769 | 0.325 |
| UBE2G1      | 6.93E-44 | 0.841522854 | 0.715 | 0.316 |



|            |          |             |       |       |
|------------|----------|-------------|-------|-------|
| RFC11      | 7.28E-44 | 0.809211362 | 0.715 | 0.309 |
| FAM214A3   | 1.20E-43 | 0.981755918 | 0.818 | 0.405 |
| ADORA2A    | 1.25E-43 | 0.393475728 | 0.293 | 0.067 |
| UBAP2      | 1.44E-43 | 1.162492565 | 0.678 | 0.306 |
| RNF121     | 2.14E-43 | 0.586302368 | 0.405 | 0.115 |
| GAPDH5     | 2.44E-43 | 0.876153456 | 0.967 | 0.84  |
| MCCC1      | 2.87E-43 | 0.471177742 | 0.351 | 0.089 |
| PRDM23     | 3.09E-43 | 0.982228317 | 0.934 | 0.647 |
| ACAP22     | 3.65E-43 | 1.027594465 | 0.888 | 0.536 |
| ABI11      | 4.50E-43 | 0.88192655  | 0.88  | 0.483 |
| LMO41      | 4.57E-43 | 0.6083837   | 0.583 | 0.213 |
| DCK2       | 5.65E-43 | 0.659917264 | 0.463 | 0.148 |
| ARID1B2    | 6.12E-43 | 0.963083704 | 0.955 | 0.694 |
| LTB7       | 9.08E-43 | 1.258773454 | 0.826 | 0.444 |
| EZH21      | 1.01E-42 | 0.730931666 | 0.678 | 0.269 |
| ARPC36     | 1.04E-42 | 0.95004891  | 0.938 | 0.773 |
| TERF2IP2   | 1.11E-42 | 0.892647011 | 0.893 | 0.541 |
| ROCK2      | 1.42E-42 | 0.715825705 | 0.55  | 0.199 |
| CIITA4     | 2.23E-42 | 0.546979426 | 0.496 | 0.156 |
| RMND5B     | 3.74E-42 | 0.377445242 | 0.31  | 0.073 |
| MGAT52     | 3.94E-42 | 0.74617619  | 0.905 | 0.489 |
| CD814      | 4.50E-42 | 0.841539229 | 0.88  | 0.522 |
| HERC4      | 4.68E-42 | 1.11596769  | 0.773 | 0.395 |
| AC009522.1 | 8.51E-42 | 0.482560952 | 0.339 | 0.087 |
| B3GLCT     | 1.12E-41 | 0.592468083 | 0.5   | 0.16  |
| RNGTT1     | 3.95E-41 | 0.896563529 | 0.789 | 0.408 |
| NPAT       | 4.22E-41 | 0.672111665 | 0.583 | 0.216 |
| UQCC2      | 4.42E-41 | 0.65516433  | 0.488 | 0.165 |
| AC010894.3 | 4.84E-41 | 0.674793364 | 0.669 | 0.272 |
| MOB1B1     | 5.28E-41 | 0.595917006 | 0.467 | 0.151 |
| MCM7       | 5.91E-41 | 0.513273045 | 0.293 | 0.07  |
| FAM30A1    | 5.99E-41 | 0.564983526 | 0.298 | 0.07  |
| FARP23     | 6.76E-41 | 0.688037543 | 0.566 | 0.208 |
| OAZ14      | 1.23E-40 | 0.907193801 | 0.971 | 0.864 |
| SETBP13    | 1.48E-40 | 0.810295677 | 0.562 | 0.201 |
| WDR271     | 1.51E-40 | 0.516987713 | 0.376 | 0.104 |
| RUFY32     | 1.71E-40 | 0.547272608 | 0.455 | 0.144 |
| LINC02422  | 1.77E-40 | 0.3330502   | 0.314 | 0.076 |
| ADAM173    | 1.95E-40 | 0.718522306 | 0.678 | 0.289 |
| SNX35      | 2.86E-40 | 0.720268076 | 0.86  | 0.46  |
| MEF2C-AS1  | 3.95E-40 | 0.476116446 | 0.264 | 0.059 |
| HLA-DPA15  | 4.24E-40 | 0.636803328 | 0.955 | 0.576 |
| PRRG4      | 4.28E-40 | 0.480146361 | 0.277 | 0.065 |

|            |          |             |       |       |
|------------|----------|-------------|-------|-------|
| HACD2      | 4.97E-40 | 0.54895764  | 0.467 | 0.15  |
| LINC00426  | 5.53E-40 | 0.550039246 | 0.45  | 0.138 |
| ARHGAP17   | 5.67E-40 | 0.608582087 | 0.504 | 0.174 |
| CFL14      | 1.63E-39 | 0.866222017 | 0.963 | 0.827 |
| STX12      | 1.78E-39 | 0.718776675 | 0.579 | 0.222 |
| HIP1R1     | 2.40E-39 | 0.444521225 | 0.442 | 0.132 |
| ARHGAP252  | 3.53E-39 | 0.675297234 | 0.748 | 0.333 |
| C22orf34   | 3.54E-39 | 0.555623675 | 0.471 | 0.157 |
| MRPL511    | 3.54E-39 | 0.704904802 | 0.698 | 0.328 |
| CHD93      | 3.65E-39 | 0.806913733 | 0.707 | 0.316 |
| HERPUD14   | 4.31E-39 | 0.948138635 | 0.934 | 0.711 |
| SOCS12     | 5.50E-39 | 0.648362036 | 0.818 | 0.387 |
| LRCH11     | 5.62E-39 | 0.864245751 | 0.674 | 0.293 |
| AC073111.4 | 5.82E-39 | 0.37601049  | 0.285 | 0.067 |
| EIF4ENIF1  | 5.90E-39 | 0.398502597 | 0.318 | 0.08  |
| SP1403     | 5.95E-39 | 0.948531041 | 0.843 | 0.469 |
| RBBP7      | 6.23E-39 | 0.70420177  | 0.566 | 0.222 |
| NUSAP1     | 7.18E-39 | 0.557216255 | 0.38  | 0.11  |
| MOB3A4     | 8.51E-39 | 0.680581373 | 0.748 | 0.341 |
| GSTZ1      | 8.62E-39 | 0.367127028 | 0.26  | 0.06  |
| SS181      | 1.18E-38 | 0.695222674 | 0.669 | 0.29  |
| KMT2A      | 1.26E-38 | 1.094450422 | 0.777 | 0.418 |
| TBC1D13    | 1.76E-38 | 0.899005394 | 0.698 | 0.327 |
| SREBF22    | 2.03E-38 | 0.780200946 | 0.698 | 0.317 |
| EYA3       | 2.41E-38 | 0.795789123 | 0.525 | 0.197 |
| CEP571     | 2.78E-38 | 0.677483743 | 0.702 | 0.312 |
| HDAC93     | 3.07E-38 | 0.567475606 | 0.554 | 0.198 |
| HLA-DPB15  | 3.98E-38 | 0.625196063 | 0.95  | 0.597 |
| MPP6       | 4.52E-38 | 0.378448045 | 0.343 | 0.091 |
| FNBP12     | 5.11E-38 | 0.758934482 | 0.971 | 0.792 |
| HSD17B121  | 5.39E-38 | 0.437903964 | 0.393 | 0.12  |
| SNX26      | 7.31E-38 | 0.623787231 | 0.831 | 0.413 |
| SASH31     | 8.56E-38 | 0.472086969 | 0.488 | 0.163 |
| HOPX1      | 9.87E-38 | 0.572619248 | 0.38  | 0.108 |
| SMARCA4    | 1.47E-37 | 0.492672248 | 0.492 | 0.172 |
| ATXN10     | 1.56E-37 | 0.648013405 | 0.669 | 0.288 |
| DBNL4      | 3.36E-37 | 0.551107251 | 0.665 | 0.276 |
| BAG2       | 3.73E-37 | 0.433945353 | 0.31  | 0.081 |
| EBLN3P1    | 6.31E-37 | 0.504250792 | 0.5   | 0.173 |
| CD835      | 1.09E-36 | 0.660307989 | 0.88  | 0.438 |
| MRPL15     | 1.41E-36 | 0.549849465 | 0.343 | 0.101 |
| MTPN4      | 1.41E-36 | 0.723825911 | 0.851 | 0.493 |
| CD2AP3     | 1.45E-36 | 0.601099679 | 0.715 | 0.316 |

|            |          |             |       |       |
|------------|----------|-------------|-------|-------|
| CYB5R3     | 1.46E-36 | 0.564129545 | 0.467 | 0.163 |
| MAP4K1     | 1.57E-36 | 0.418793952 | 0.438 | 0.139 |
| AMD11      | 1.59E-36 | 0.814387795 | 0.843 | 0.508 |
| ANAPC15    | 1.60E-36 | 0.408666104 | 0.401 | 0.124 |
| RCC21      | 1.69E-36 | 0.502844195 | 0.483 | 0.169 |
| WDPCP1     | 2.06E-36 | 0.721685225 | 0.55  | 0.21  |
| OSER12     | 2.50E-36 | 0.813223713 | 0.715 | 0.348 |
| NET1       | 2.75E-36 | 0.377403861 | 0.26  | 0.062 |
| XPO1       | 2.85E-36 | 0.740177524 | 0.719 | 0.34  |
| ARHGEF182  | 3.52E-36 | 0.613859906 | 0.628 | 0.253 |
| CLCN6      | 3.66E-36 | 0.443926228 | 0.351 | 0.102 |
| HNRNPD2    | 6.44E-36 | 0.765641721 | 0.864 | 0.566 |
| SLC44A22   | 8.56E-36 | 0.457749566 | 0.562 | 0.203 |
| ALOX53     | 1.44E-35 | 0.526093721 | 0.413 | 0.135 |
| POMP4      | 1.52E-35 | 0.730608518 | 0.88  | 0.553 |
| LYL12      | 1.68E-35 | 0.437359444 | 0.351 | 0.102 |
| MAST2      | 2.01E-35 | 0.480226959 | 0.413 | 0.133 |
| AC005670.3 | 3.02E-35 | 0.377976541 | 0.339 | 0.095 |
| AL078459.1 | 3.64E-35 | 0.538310328 | 0.281 | 0.072 |
| QRSL1      | 3.89E-35 | 0.482327193 | 0.36  | 0.106 |
| TP53INP13  | 3.97E-35 | 0.79045139  | 0.645 | 0.283 |
| ANO61      | 4.25E-35 | 0.722373263 | 0.545 | 0.215 |
| ZBTB442    | 5.64E-35 | 0.597314541 | 0.587 | 0.231 |
| ASB2       | 6.34E-35 | 0.36628895  | 0.293 | 0.076 |
| ADAM283    | 6.34E-35 | 0.293956359 | 0.657 | 0.253 |
| PIKFYVE4   | 7.20E-35 | 0.591550945 | 0.62  | 0.26  |
| BRK12      | 7.54E-35 | 0.723861192 | 0.785 | 0.419 |
| STIM22     | 7.96E-35 | 0.742660356 | 0.822 | 0.443 |
| IPO5       | 9.97E-35 | 0.363222941 | 0.372 | 0.112 |
| LINC022452 | 1.26E-34 | 0.561801209 | 0.562 | 0.223 |
| PUDP       | 1.29E-34 | 0.376747288 | 0.331 | 0.092 |
| SMDT14     | 2.59E-34 | 0.69476473  | 0.855 | 0.507 |
| TTLL3      | 2.81E-34 | 0.348623321 | 0.306 | 0.082 |
| LY751      | 4.20E-34 | 0.597896443 | 0.566 | 0.223 |
| DMTF1      | 4.24E-34 | 0.517768474 | 0.628 | 0.253 |
| ISG202     | 5.26E-34 | 1.084442534 | 0.934 | 0.722 |
| DENND6B    | 5.93E-34 | 0.41607302  | 0.269 | 0.069 |
| RAP2A      | 6.30E-34 | 0.833829037 | 0.376 | 0.124 |
| SFT2D1     | 7.39E-34 | 0.566658939 | 0.661 | 0.296 |
| RHOA4      | 9.22E-34 | 0.659279715 | 0.938 | 0.691 |
| ESR22      | 1.02E-33 | 0.542845612 | 0.554 | 0.212 |
| ILRUN2     | 1.14E-33 | 0.61710487  | 0.661 | 0.295 |
| LINC01572  | 1.19E-33 | 0.614268051 | 0.281 | 0.074 |

|             |          |             |       |       |
|-------------|----------|-------------|-------|-------|
| ZNF626      | 1.45E-33 | 0.352004056 | 0.339 | 0.096 |
| ERP44       | 2.52E-33 | 0.763835356 | 0.731 | 0.378 |
| SIAH21      | 2.91E-33 | 0.652895862 | 0.702 | 0.33  |
| EHD11       | 2.91E-33 | 0.613317069 | 0.653 | 0.279 |
| METTL7A2    | 3.09E-33 | 0.354023144 | 0.31  | 0.088 |
| GABARAPL23  | 3.79E-33 | 0.656924681 | 0.719 | 0.356 |
| AL133480.11 | 3.96E-33 | 0.414100788 | 0.376 | 0.114 |
| NFX11       | 4.43E-33 | 0.595106728 | 0.607 | 0.251 |
| IGHM3       | 4.67E-33 | 0.325574396 | 0.529 | 0.213 |
| MYL6B       | 5.14E-33 | 0.350045756 | 0.36  | 0.111 |
| HNRNPA13    | 5.57E-33 | 0.716428763 | 0.963 | 0.797 |
| MFAP1       | 6.48E-33 | 0.463669663 | 0.525 | 0.199 |
| REPIN11     | 7.62E-33 | 0.37845899  | 0.289 | 0.079 |
| MRPL35      | 8.36E-33 | 0.35097014  | 0.289 | 0.078 |
| UIMC11      | 9.14E-33 | 0.534295711 | 0.612 | 0.26  |
| UHRF21      | 9.60E-33 | 0.618159846 | 0.736 | 0.347 |
| PGLS4       | 9.63E-33 | 0.563205408 | 0.64  | 0.281 |
| SNHG294     | 1.12E-32 | 0.739688266 | 0.909 | 0.671 |
| PALM2-AKAP2 | 1.19E-32 | 0.461385182 | 0.55  | 0.212 |
| PCCB        | 1.24E-32 | 0.432438108 | 0.264 | 0.068 |
| ZCCHC102    | 1.51E-32 | 0.543358681 | 0.645 | 0.279 |
| PNN         | 1.56E-32 | 0.701435529 | 0.793 | 0.44  |
| RPAIN       | 2.78E-32 | 0.555928714 | 0.537 | 0.215 |
| DBI4        | 3.46E-32 | 0.834835789 | 0.835 | 0.524 |
| ZFAT        | 3.51E-32 | 0.418189683 | 0.38  | 0.12  |
| FYTTD12     | 3.66E-32 | 0.610777736 | 0.62  | 0.275 |
| MAD1L12     | 4.47E-32 | 0.762838779 | 0.632 | 0.282 |
| MPZL12      | 5.23E-32 | 0.405903717 | 0.306 | 0.088 |
| PPP1CA1     | 5.33E-32 | 0.646195204 | 0.702 | 0.347 |
| DDX39A1     | 5.58E-32 | 0.608591414 | 0.632 | 0.281 |
| MGME1       | 7.62E-32 | 0.404617319 | 0.38  | 0.122 |
| SINHCAF3    | 8.34E-32 | 0.613671317 | 0.649 | 0.287 |
| GTF2I2      | 9.00E-32 | 0.565646236 | 0.707 | 0.333 |
| SEC622      | 9.54E-32 | 0.66677797  | 0.876 | 0.561 |
| FRY1        | 1.03E-31 | 0.308000299 | 0.285 | 0.077 |
| MYEF2       | 1.06E-31 | 0.266493006 | 0.256 | 0.064 |
| GTF2E21     | 1.12E-31 | 0.463549326 | 0.5   | 0.189 |
| PPP3CC2     | 1.12E-31 | 0.697069346 | 0.756 | 0.383 |
| SELENOH3    | 1.40E-31 | 0.666342563 | 0.781 | 0.434 |
| BLCAP       | 1.47E-31 | 0.381279766 | 0.355 | 0.11  |
| H3F3A4      | 1.99E-31 | 0.684179497 | 0.963 | 0.892 |
| MGMT3       | 2.08E-31 | 0.889539573 | 0.653 | 0.325 |
| OSBPL32     | 2.36E-31 | 0.633743696 | 0.715 | 0.346 |

|            |          |             |       |       |
|------------|----------|-------------|-------|-------|
| BAZ2B3     | 3.28E-31 | 0.546440496 | 0.636 | 0.286 |
| TASOR21    | 4.97E-31 | 0.776619361 | 0.682 | 0.326 |
| PRDX31     | 6.42E-31 | 0.455946231 | 0.438 | 0.161 |
| NCF41      | 1.07E-30 | 0.445773154 | 0.5   | 0.193 |
| WASF21     | 1.46E-30 | 0.676905717 | 0.818 | 0.48  |
| CAPN1      | 1.62E-30 | 0.449765187 | 0.426 | 0.152 |
| NT5C21     | 1.68E-30 | 0.532678397 | 0.661 | 0.307 |
| RAN        | 1.70E-30 | 0.725563229 | 0.88  | 0.598 |
| ZHX3       | 2.02E-30 | 0.373417445 | 0.289 | 0.08  |
| OSBPL91    | 2.11E-30 | 0.716984677 | 0.665 | 0.324 |
| AFTPH3     | 2.14E-30 | 0.631666212 | 0.715 | 0.355 |
| DEPDC5     | 2.47E-30 | 0.544843316 | 0.343 | 0.11  |
| SNHG52     | 2.71E-30 | 0.637994947 | 0.909 | 0.648 |
| RC3H2      | 2.72E-30 | 0.563432603 | 0.55  | 0.225 |
| CKS1B      | 3.14E-30 | 0.382882553 | 0.31  | 0.093 |
| NFATC15    | 4.34E-30 | 0.531939704 | 0.624 | 0.264 |
| PFN15      | 4.65E-30 | 0.770921395 | 0.959 | 0.772 |
| KHDRBS11   | 5.64E-30 | 0.597492386 | 0.802 | 0.463 |
| KLHL242    | 5.83E-30 | 0.626793375 | 0.69  | 0.337 |
| OGFRL13    | 6.86E-30 | 0.796759038 | 0.545 | 0.234 |
| MSH2       | 6.94E-30 | 0.285613569 | 0.273 | 0.073 |
| SLC37A11   | 1.40E-29 | 0.49207133  | 0.384 | 0.131 |
| RNF41      | 1.67E-29 | 0.506658647 | 0.355 | 0.117 |
| XPNPEP1    | 1.69E-29 | 0.368975937 | 0.285 | 0.082 |
| CD2BP21    | 1.85E-29 | 0.399882433 | 0.554 | 0.222 |
| C19orf48   | 1.91E-29 | 0.462427555 | 0.326 | 0.101 |
| AC024560.5 | 2.08E-29 | 0.307426816 | 0.281 | 0.078 |
| LSM6       | 2.24E-29 | 0.510673546 | 0.521 | 0.214 |
| NAA381     | 2.53E-29 | 0.53376313  | 0.607 | 0.279 |
| UBE2N2     | 2.76E-29 | 0.562048009 | 0.785 | 0.425 |
| ATP5MC32   | 2.77E-29 | 0.582436202 | 0.814 | 0.486 |
| RFXANK     | 4.49E-29 | 0.358897338 | 0.384 | 0.132 |
| GLRX3      | 5.10E-29 | 0.412292897 | 0.508 | 0.203 |
| ZNF580     | 5.30E-29 | 0.355334426 | 0.331 | 0.104 |
| ARHGEF72   | 5.41E-29 | 0.479000233 | 0.76  | 0.369 |
| ZNF532     | 6.53E-29 | 0.364778522 | 0.285 | 0.082 |
| ITGAE3     | 6.58E-29 | 0.447359255 | 0.661 | 0.297 |
| SGSM3      | 8.38E-29 | 0.263726431 | 0.306 | 0.091 |
| KCTD9      | 8.53E-29 | 0.383465386 | 0.326 | 0.101 |
| RHBDF25    | 9.68E-29 | 0.48607031  | 0.517 | 0.208 |
| CEP135     | 9.91E-29 | 0.471891287 | 0.43  | 0.159 |
| CENPP      | 1.13E-28 | 0.655141237 | 0.331 | 0.107 |
| ITPR12     | 1.16E-28 | 0.627784449 | 0.843 | 0.482 |

|            |          |             |       |       |
|------------|----------|-------------|-------|-------|
| ATP8A13    | 1.32E-28 | 0.555557955 | 0.818 | 0.431 |
| CCT82      | 1.43E-28 | 0.58858632  | 0.719 | 0.386 |
| RMDN1      | 1.55E-28 | 0.486416377 | 0.417 | 0.155 |
| SNRPE1     | 1.85E-28 | 0.507800629 | 0.665 | 0.323 |
| FAM13B2    | 2.64E-28 | 0.615939785 | 0.777 | 0.41  |
| LINC00467  | 2.95E-28 | 0.407380832 | 0.281 | 0.082 |
| ROMO11     | 2.96E-28 | 0.46677202  | 0.636 | 0.302 |
| SNAP23     | 3.30E-28 | 0.486291285 | 0.599 | 0.27  |
| CHAF1A1    | 3.35E-28 | 0.393378513 | 0.269 | 0.076 |
| KLF123     | 3.77E-28 | 0.637897356 | 0.86  | 0.499 |
| CNTRL2     | 3.84E-28 | 0.658189303 | 0.702 | 0.366 |
| CLTC3      | 3.93E-28 | 0.578929081 | 0.653 | 0.315 |
| SFXN4      | 4.18E-28 | 0.349972827 | 0.273 | 0.079 |
| AC027644.3 | 4.18E-28 | 0.376685203 | 0.277 | 0.081 |
| UPF3A      | 5.11E-28 | 0.435933794 | 0.521 | 0.212 |
| MBD22      | 5.33E-28 | 0.612295285 | 0.785 | 0.454 |
| CAB39L     | 5.34E-28 | 0.340339225 | 0.273 | 0.078 |
| PARN       | 5.83E-28 | 0.428123827 | 0.467 | 0.181 |
| TAPT11     | 6.55E-28 | 0.519289151 | 0.479 | 0.19  |
| ARPC42     | 9.21E-28 | 0.588696567 | 0.744 | 0.384 |
| HMGB24     | 9.62E-28 | 1.035182563 | 0.781 | 0.447 |
| TIAM21     | 1.13E-27 | 0.471802311 | 0.483 | 0.191 |
| ZNF66      | 1.52E-27 | 0.39198398  | 0.285 | 0.084 |
| LSM74      | 1.89E-27 | 0.687883977 | 0.781 | 0.454 |
| RABEP12    | 2.04E-27 | 0.625599238 | 0.731 | 0.383 |
| PMAIP11    | 2.23E-27 | 0.756741433 | 0.802 | 0.434 |
| USP22      | 2.67E-27 | 0.42455973  | 0.566 | 0.242 |
| PPP4C      | 3.60E-27 | 0.462187401 | 0.554 | 0.241 |
| TADA3      | 4.19E-27 | 0.321981263 | 0.426 | 0.156 |
| ELF11      | 4.19E-27 | 0.674428899 | 0.992 | 0.861 |
| AP1B13     | 4.39E-27 | 0.485553499 | 0.558 | 0.243 |
| PSMA42     | 4.48E-27 | 0.506682046 | 0.649 | 0.312 |
| RABGEF12   | 5.21E-27 | 0.561691706 | 0.814 | 0.471 |
| WIPF12     | 5.27E-27 | 0.722216147 | 0.913 | 0.629 |
| POLR2G     | 5.64E-27 | 0.485418555 | 0.545 | 0.24  |
| ZNF552     | 5.81E-27 | 0.43369168  | 0.277 | 0.082 |
| MTF21      | 6.43E-27 | 0.528787079 | 0.632 | 0.296 |
| BAIAP2L1   | 7.95E-27 | 0.542287465 | 0.298 | 0.093 |
| RAB11FIP14 | 8.21E-27 | 0.566186903 | 0.839 | 0.496 |
| COX5A3     | 8.90E-27 | 0.714488001 | 0.764 | 0.448 |
| BOD1L12    | 1.07E-26 | 0.57798823  | 0.814 | 0.47  |
| TUT72      | 1.08E-26 | 0.81078622  | 0.748 | 0.425 |
| COX11      | 1.25E-26 | 0.318893835 | 0.376 | 0.13  |

|             |          |             |       |       |
|-------------|----------|-------------|-------|-------|
| SH3BP56     | 1.26E-26 | 0.377468547 | 0.669 | 0.305 |
| LYRM4       | 1.39E-26 | 0.483771006 | 0.397 | 0.149 |
| LUC7L31     | 1.44E-26 | 0.538640177 | 0.785 | 0.437 |
| YWHAQ2      | 1.46E-26 | 0.577967475 | 0.839 | 0.515 |
| MBNL3       | 1.51E-26 | 0.427018974 | 0.273 | 0.081 |
| TRABD1      | 1.61E-26 | 0.437583773 | 0.566 | 0.25  |
| STK401      | 1.73E-26 | 0.498263248 | 0.455 | 0.182 |
| ZNF106      | 1.86E-26 | 0.483316133 | 0.545 | 0.24  |
| SPPL2B      | 2.04E-26 | 0.393207427 | 0.285 | 0.087 |
| YWHAB4      | 2.35E-26 | 0.632487005 | 0.913 | 0.709 |
| UGGT1       | 2.36E-26 | 0.451355905 | 0.426 | 0.163 |
| URM1        | 3.28E-26 | 0.314672614 | 0.459 | 0.175 |
| PHB23       | 4.67E-26 | 0.484477366 | 0.628 | 0.301 |
| SLC9B2      | 4.79E-26 | 0.353894887 | 0.335 | 0.11  |
| SHLD1       | 5.26E-26 | 0.35282002  | 0.455 | 0.173 |
| RIC11       | 5.28E-26 | 0.55667798  | 0.707 | 0.367 |
| ATP10D      | 5.47E-26 | 0.364343094 | 0.36  | 0.127 |
| AL162253.21 | 6.67E-26 | 0.395200543 | 0.31  | 0.101 |
| FOXN32      | 6.93E-26 | 0.794431201 | 0.95  | 0.726 |
| ZNF1411     | 7.02E-26 | 0.392060984 | 0.409 | 0.151 |
| MOB1A5      | 7.63E-26 | 0.572704926 | 0.802 | 0.479 |
| RASSF32     | 7.83E-26 | 0.397007702 | 0.661 | 0.3   |
| ATP6V0A12   | 8.30E-26 | 0.455407129 | 0.331 | 0.115 |
| SNRPA       | 8.38E-26 | 0.415388159 | 0.438 | 0.171 |
| LSM14A      | 8.74E-26 | 0.558392793 | 0.798 | 0.471 |
| MARF11      | 8.84E-26 | 0.401828723 | 0.455 | 0.177 |
| TUFM1       | 1.15E-25 | 0.463925665 | 0.607 | 0.285 |
| GSTP15      | 1.22E-25 | 0.56464219  | 0.793 | 0.461 |
| PACS13      | 1.26E-25 | 0.546509939 | 0.851 | 0.496 |
| TMEM256     | 1.42E-25 | 0.422627003 | 0.537 | 0.236 |
| ERBIN3      | 1.55E-25 | 0.78451816  | 0.826 | 0.504 |
| MDH11       | 1.65E-25 | 0.547882759 | 0.603 | 0.287 |
| C1QBP1      | 1.75E-25 | 0.450938993 | 0.632 | 0.311 |
| LINC014731  | 2.12E-25 | 0.383966135 | 0.393 | 0.142 |
| UPF23       | 2.37E-25 | 0.529448682 | 0.653 | 0.327 |
| RNF103      | 2.37E-25 | 0.54297561  | 0.405 | 0.157 |
| KDM1B       | 2.88E-25 | 0.257868561 | 0.252 | 0.073 |
| SYNGR25     | 3.04E-25 | 0.468815439 | 0.591 | 0.27  |
| TPST2       | 3.13E-25 | 0.356501139 | 0.372 | 0.137 |
| ARRDC1      | 3.35E-25 | 0.367027463 | 0.306 | 0.1   |
| ZHX23       | 4.43E-25 | 0.835081516 | 0.893 | 0.603 |
| ELP6        | 4.47E-25 | 0.296095155 | 0.322 | 0.107 |
| ZNF814      | 4.94E-25 | 0.337783296 | 0.326 | 0.108 |

|             |          |             |       |       |
|-------------|----------|-------------|-------|-------|
| ACYP2       | 6.09E-25 | 0.398185911 | 0.587 | 0.264 |
| CCDC1671    | 6.93E-25 | 0.495039712 | 0.483 | 0.206 |
| MIOS        | 8.49E-25 | 0.416047686 | 0.36  | 0.13  |
| SIT1        | 9.31E-25 | 0.400132603 | 0.417 | 0.156 |
| PKIG3       | 9.98E-25 | 0.303023942 | 0.355 | 0.123 |
| SRP9        | 1.01E-24 | 0.548540941 | 0.64  | 0.33  |
| ARID5B4     | 1.06E-24 | 0.598509931 | 0.975 | 0.751 |
| ATP5F1B2    | 1.14E-24 | 0.503003568 | 0.777 | 0.44  |
| TFEB2       | 1.59E-24 | 0.362615683 | 0.351 | 0.125 |
| MICU22      | 1.59E-24 | 0.775348899 | 0.678 | 0.369 |
| MRPL521     | 1.69E-24 | 0.449867887 | 0.587 | 0.279 |
| ANKRD26     | 1.73E-24 | 0.26695099  | 0.302 | 0.097 |
| TBC1D22A2   | 2.22E-24 | 0.626058245 | 0.847 | 0.531 |
| SLC25A31    | 2.31E-24 | 0.598463873 | 0.884 | 0.636 |
| ARSB2       | 2.34E-24 | 0.621521858 | 0.388 | 0.149 |
| CCM22       | 2.36E-24 | 0.402060644 | 0.661 | 0.323 |
| FGD23       | 2.67E-24 | 0.318148169 | 0.318 | 0.108 |
| TAF1D2      | 3.53E-24 | 0.513329582 | 0.884 | 0.586 |
| ACTR24      | 4.13E-24 | 0.565995783 | 0.905 | 0.637 |
| SCAF82      | 4.14E-24 | 0.4999119   | 0.723 | 0.398 |
| MAPK8IP32   | 4.24E-24 | 0.372226934 | 0.417 | 0.16  |
| CDR21       | 4.38E-24 | 0.684377176 | 0.632 | 0.324 |
| GABPB1-AS1  | 5.05E-24 | 0.477935167 | 0.533 | 0.234 |
| COMMD4      | 5.11E-24 | 0.426356443 | 0.388 | 0.151 |
| DGUOK1      | 5.16E-24 | 0.463151576 | 0.69  | 0.354 |
| SEPHS2      | 5.43E-24 | 0.403704715 | 0.397 | 0.153 |
| LSM81       | 5.87E-24 | 0.47940151  | 0.719 | 0.38  |
| ATP6V1A1    | 6.41E-24 | 0.487239774 | 0.541 | 0.244 |
| AF117829.13 | 8.80E-24 | 0.341702728 | 0.364 | 0.135 |
| ATP5PF      | 9.53E-24 | 0.517948467 | 0.76  | 0.464 |
| PRDX13      | 1.01E-23 | 0.58147868  | 0.843 | 0.564 |
| DRAM24      | 1.03E-23 | 0.34613124  | 0.525 | 0.226 |
| ZRANB3      | 1.05E-23 | 0.354037236 | 0.347 | 0.122 |
| ACSF3       | 1.18E-23 | 0.388518334 | 0.364 | 0.136 |
| GON7        | 1.38E-23 | 0.279185479 | 0.26  | 0.08  |
| EIF2B1      | 1.56E-23 | 0.298470537 | 0.318 | 0.109 |
| AP5Z1       | 1.65E-23 | 0.583230363 | 0.488 | 0.218 |
| FO393401.1  | 1.68E-23 | 0.293051551 | 0.273 | 0.085 |
| ZDHHC21     | 1.69E-23 | 0.409693574 | 0.38  | 0.144 |
| SHOC23      | 1.93E-23 | 0.567118355 | 0.669 | 0.361 |
| GLRX5       | 1.96E-23 | 0.429116873 | 0.446 | 0.187 |
| IDE         | 2.04E-23 | 0.408493126 | 0.285 | 0.095 |
| IAH1        | 2.13E-23 | 0.402553246 | 0.483 | 0.208 |



|           |          |             |       |       |
|-----------|----------|-------------|-------|-------|
| FAM135A   | 2.34E-23 | 0.287910628 | 0.351 | 0.126 |
| CDV33     | 2.90E-23 | 0.549779054 | 0.872 | 0.6   |
| VCPKMT    | 2.92E-23 | 0.442948594 | 0.364 | 0.138 |
| LARP4B1   | 3.42E-23 | 0.634413564 | 0.715 | 0.399 |
| ARL2BP    | 3.44E-23 | 0.450588885 | 0.355 | 0.133 |
| PHF102    | 3.53E-23 | 0.409796664 | 0.413 | 0.166 |
| MCTS1     | 4.18E-23 | 0.40254104  | 0.483 | 0.211 |
| SRGAP26   | 4.25E-23 | 0.515827222 | 0.562 | 0.272 |
| ARPC1B5   | 4.96E-23 | 0.612489528 | 0.876 | 0.631 |
| HSD17B10  | 5.16E-23 | 0.351778272 | 0.45  | 0.188 |
| HELZ      | 5.54E-23 | 0.597029029 | 0.756 | 0.447 |
| EIF2S33   | 5.56E-23 | 0.437186345 | 0.707 | 0.374 |
| CEPT11    | 5.65E-23 | 0.364679796 | 0.364 | 0.137 |
| SRGAP2B3  | 5.72E-23 | 0.388873393 | 0.36  | 0.135 |
| SLC25A333 | 6.52E-23 | 0.412568071 | 0.512 | 0.225 |
| HTT1      | 6.59E-23 | 0.520941762 | 0.562 | 0.272 |
| RPAP3     | 7.11E-23 | 0.337527606 | 0.343 | 0.125 |
| MRPL37    | 7.48E-23 | 0.258496873 | 0.293 | 0.098 |
| RHOQ5     | 9.09E-23 | 0.407138479 | 0.525 | 0.233 |
| MCM3      | 9.46E-23 | 0.349008109 | 0.256 | 0.08  |
| Mar-82    | 9.85E-23 | 0.525811479 | 0.496 | 0.22  |
| SULF22    | 1.03E-22 | 0.395208285 | 0.331 | 0.119 |
| CD272     | 1.04E-22 | 0.514469581 | 0.624 | 0.297 |
| CNN23     | 1.09E-22 | 0.414740446 | 0.607 | 0.294 |
| LRRC37A2  | 1.17E-22 | 0.444020465 | 0.289 | 0.099 |
| SLAIN21   | 1.26E-22 | 0.673526475 | 0.595 | 0.301 |
| SKA2      | 1.29E-22 | 0.342712966 | 0.372 | 0.142 |
| MRPS14    | 1.30E-22 | 0.287092486 | 0.368 | 0.137 |
| PIGB1     | 1.44E-22 | 0.43705842  | 0.421 | 0.169 |
| SELENOT   | 1.52E-22 | 0.533320405 | 0.785 | 0.485 |
| INTS10    | 1.64E-22 | 0.44841932  | 0.397 | 0.163 |
| UQCRH4    | 1.65E-22 | 0.631093736 | 0.872 | 0.644 |
| UBE2H2    | 1.72E-22 | 0.573422719 | 0.831 | 0.526 |
| HSBP13    | 1.83E-22 | 0.405422824 | 0.57  | 0.266 |
| ARF5      | 2.05E-22 | 0.386777568 | 0.45  | 0.192 |
| THOC2     | 2.19E-22 | 0.458727201 | 0.711 | 0.379 |
| PPP2R1A   | 2.23E-22 | 0.305978115 | 0.492 | 0.209 |
| COQ7      | 2.59E-22 | 0.29832028  | 0.347 | 0.126 |
| GGNBP2    | 2.59E-22 | 0.535446324 | 0.678 | 0.37  |
| CPSF3     | 2.86E-22 | 0.278324216 | 0.277 | 0.091 |
| DLEU22    | 2.93E-22 | 0.707472374 | 0.81  | 0.501 |
| TCHP      | 2.95E-22 | 0.285903317 | 0.331 | 0.117 |
| CCNB1IP1  | 3.07E-22 | 0.355533231 | 0.36  | 0.135 |

|            |          |             |       |       |
|------------|----------|-------------|-------|-------|
| CPSF6      | 3.30E-22 | 0.345583934 | 0.649 | 0.31  |
| EEF23      | 3.44E-22 | 0.45539831  | 0.95  | 0.742 |
| ZNF1071    | 3.71E-22 | 0.40465019  | 0.471 | 0.202 |
| RBM262     | 4.62E-22 | 0.53813066  | 0.702 | 0.367 |
| AL450998.2 | 5.28E-22 | 0.275516845 | 0.277 | 0.091 |
| SAMM50     | 5.38E-22 | 0.2829605   | 0.31  | 0.11  |
| MFN11      | 5.43E-22 | 0.396639902 | 0.405 | 0.165 |
| STK17A4    | 5.43E-22 | 0.506761286 | 0.917 | 0.648 |
| CUL4B      | 5.84E-22 | 0.313581256 | 0.277 | 0.093 |
| BTBD1      | 5.96E-22 | 0.357509682 | 0.533 | 0.24  |
| WWC3       | 6.28E-22 | 0.250624366 | 0.252 | 0.078 |
| QARS       | 6.37E-22 | 0.251461698 | 0.343 | 0.125 |
| FKBP3      | 6.41E-22 | 0.363245447 | 0.483 | 0.213 |
| DYNLL15    | 6.83E-22 | 0.783997761 | 0.876 | 0.635 |
| UNK        | 7.88E-22 | 0.312980415 | 0.388 | 0.151 |
| CEP1706    | 9.71E-22 | 0.425954302 | 0.541 | 0.251 |
| ATP6V1E11  | 9.76E-22 | 0.422652352 | 0.554 | 0.267 |
| IGHD1      | 1.00E-21 | 0.382998441 | 0.289 | 0.095 |
| CARHSP1    | 1.06E-21 | 0.395766947 | 0.525 | 0.241 |
| PTEN2      | 1.07E-21 | 0.315157293 | 0.752 | 0.425 |
| IL162      | 1.26E-21 | 0.378071422 | 0.504 | 0.22  |
| ASPH2      | 1.29E-21 | 0.301000174 | 0.376 | 0.147 |
| HCLS11     | 1.30E-21 | 0.553798934 | 0.831 | 0.538 |
| PPIA2      | 1.32E-21 | 0.608175215 | 0.921 | 0.824 |
| CBX5       | 1.36E-21 | 0.460044226 | 0.438 | 0.189 |
| FAM49B1    | 1.51E-21 | 0.495584988 | 0.921 | 0.672 |
| KLHL42     | 1.55E-21 | 0.291712794 | 0.273 | 0.09  |
| KIAA03551  | 1.64E-21 | 0.306959245 | 0.463 | 0.191 |
| MTHFD1L2   | 1.69E-21 | 0.509654961 | 0.393 | 0.163 |
| PDE7A2     | 2.13E-21 | 0.491836468 | 0.909 | 0.597 |
| MX13       | 2.15E-21 | 0.389854249 | 0.636 | 0.322 |
| WDR111     | 2.20E-21 | 0.338180406 | 0.36  | 0.138 |
| ADA1       | 2.28E-21 | 0.307105881 | 0.335 | 0.124 |
| PKM4       | 2.55E-21 | 0.412839552 | 0.773 | 0.422 |
| BRD41      | 2.76E-21 | 0.584515893 | 0.764 | 0.481 |
| EIF3A      | 2.86E-21 | 0.58347795  | 0.835 | 0.545 |
| SPECC1L    | 2.97E-21 | 0.376303991 | 0.5   | 0.223 |
| FAF1       | 3.16E-21 | 0.575137862 | 0.822 | 0.513 |
| ZNF700     | 3.44E-21 | 0.285921968 | 0.302 | 0.105 |
| BANF12     | 3.62E-21 | 0.341666442 | 0.628 | 0.313 |
| TRA2A1     | 3.65E-21 | 0.593608627 | 0.893 | 0.605 |
| MZT1       | 3.90E-21 | 0.30754646  | 0.36  | 0.138 |
| UBE2E14    | 3.92E-21 | 0.331533979 | 0.587 | 0.283 |

|             |          |             |       |       |
|-------------|----------|-------------|-------|-------|
| INVS        | 4.45E-21 | 0.510500337 | 0.43  | 0.184 |
| WAS         | 4.61E-21 | 0.350884771 | 0.595 | 0.28  |
| DAZAP1      | 4.76E-21 | 0.29308403  | 0.455 | 0.194 |
| LINC010041  | 5.54E-21 | 0.646282412 | 0.711 | 0.418 |
| H2AFV3      | 8.14E-21 | 0.737002781 | 0.785 | 0.506 |
| USP82       | 9.06E-21 | 0.483348119 | 0.781 | 0.47  |
| CNIH11      | 9.52E-21 | 0.370547751 | 0.5   | 0.231 |
| ARL5A2      | 9.98E-21 | 0.422044057 | 0.55  | 0.267 |
| CBR4        | 1.18E-20 | 0.293476833 | 0.277 | 0.095 |
| POLR2J1     | 1.21E-20 | 0.395791819 | 0.574 | 0.285 |
| HPS54       | 1.30E-20 | 0.474376151 | 0.483 | 0.225 |
| PTRHD11     | 1.33E-20 | 0.310242296 | 0.401 | 0.166 |
| ZNF7211     | 1.34E-20 | 0.440148638 | 0.616 | 0.311 |
| TRAPPC11    | 1.34E-20 | 0.478262117 | 0.657 | 0.358 |
| TMEM1543    | 1.52E-20 | 0.376130394 | 0.496 | 0.221 |
| MAP2K11     | 1.62E-20 | 0.351016592 | 0.736 | 0.399 |
| ATP6V1H2    | 1.63E-20 | 0.454180596 | 0.632 | 0.328 |
| MPLKIP      | 1.82E-20 | 0.357070955 | 0.409 | 0.174 |
| NGLY12      | 1.87E-20 | 0.467240818 | 0.628 | 0.329 |
| TMC6        | 1.93E-20 | 0.427867012 | 0.504 | 0.236 |
| NSMCE1      | 1.96E-20 | 0.335086269 | 0.426 | 0.182 |
| TMEM134     | 1.97E-20 | 0.342468081 | 0.434 | 0.187 |
| CDYL2       | 2.04E-20 | 0.349006782 | 0.318 | 0.118 |
| FERMT32     | 2.09E-20 | 0.392281826 | 0.512 | 0.24  |
| SNRPD11     | 2.14E-20 | 0.514419403 | 0.669 | 0.392 |
| PSIP12      | 2.40E-20 | 0.477380692 | 0.686 | 0.386 |
| CCT21       | 2.44E-20 | 0.407346051 | 0.678 | 0.356 |
| PIP4K2A2    | 2.86E-20 | 0.76342418  | 0.851 | 0.606 |
| AL050309.11 | 2.91E-20 | 0.694728979 | 0.351 | 0.143 |
| PAPSS13     | 3.05E-20 | 0.393081624 | 0.417 | 0.184 |
| LRIF12      | 3.09E-20 | 0.407403483 | 0.512 | 0.236 |
| RBM42       | 3.64E-20 | 0.303873584 | 0.355 | 0.14  |
| PABPN1      | 3.73E-20 | 0.332187026 | 0.442 | 0.193 |
| CAPN72      | 3.78E-20 | 0.583926935 | 0.632 | 0.345 |
| MTERF4      | 4.93E-20 | 0.340473082 | 0.455 | 0.197 |
| CLEC16A2    | 4.96E-20 | 0.349423004 | 0.545 | 0.258 |
| THOC7       | 5.17E-20 | 0.304657884 | 0.492 | 0.225 |
| TLR12       | 5.23E-20 | 0.264634373 | 0.252 | 0.085 |
| SMAP23      | 5.29E-20 | 0.425739919 | 0.992 | 0.849 |
| SUDS3       | 5.51E-20 | 0.334848263 | 0.426 | 0.183 |
| SPOPL1      | 6.06E-20 | 0.330779665 | 0.43  | 0.186 |
| TXN21       | 6.27E-20 | 0.274558283 | 0.483 | 0.217 |
| SNRPD31     | 6.31E-20 | 0.470406031 | 0.607 | 0.337 |

|          |          |             |       |       |
|----------|----------|-------------|-------|-------|
| NDUFB31  | 7.26E-20 | 0.399751504 | 0.545 | 0.272 |
| EIF3I1   | 8.36E-20 | 0.441123805 | 0.678 | 0.376 |
| RO60     | 8.47E-20 | 0.622842276 | 0.558 | 0.291 |
| ATP5F1A1 | 8.53E-20 | 0.426856562 | 0.669 | 0.368 |
| WIPI2    | 8.60E-20 | 0.428511471 | 0.537 | 0.261 |
| ERH1     | 8.91E-20 | 0.582641495 | 0.719 | 0.447 |
| NSD1     | 1.01E-19 | 0.402580548 | 0.636 | 0.333 |
| HDAC5    | 1.13E-19 | 0.33672404  | 0.298 | 0.109 |
| PISD     | 1.24E-19 | 0.324878965 | 0.384 | 0.157 |
| CBL      | 1.26E-19 | 0.437966496 | 0.483 | 0.226 |
| SLBP1    | 1.36E-19 | 0.46547305  | 0.661 | 0.366 |
| ETFB     | 1.59E-19 | 0.353411871 | 0.583 | 0.3   |
| PRKCB2   | 1.60E-19 | 0.475245405 | 0.884 | 0.592 |
| GRB25    | 1.75E-19 | 0.396273338 | 0.868 | 0.6   |
| PTPN63   | 1.79E-19 | 0.412791683 | 0.492 | 0.235 |
| STRN3    | 1.96E-19 | 0.450648628 | 0.583 | 0.297 |
| TRAF53   | 2.07E-19 | 0.42503012  | 0.554 | 0.271 |
| PFDN6    | 2.28E-19 | 0.273129908 | 0.38  | 0.156 |
| TRANK11  | 2.32E-19 | 0.276906805 | 0.479 | 0.212 |
| ARFGEF2  | 2.33E-19 | 0.351013757 | 0.566 | 0.284 |
| ZNF92    | 2.37E-19 | 0.315634441 | 0.517 | 0.239 |
| SMC63    | 2.61E-19 | 0.276162095 | 0.463 | 0.201 |
| PRKRIP11 | 2.80E-19 | 0.386323468 | 0.541 | 0.265 |
| EIF1AY2  | 3.53E-19 | 0.521397865 | 0.438 | 0.208 |
| PLEKHA22 | 3.73E-19 | 0.31474404  | 0.806 | 0.454 |
| CCDC115  | 4.33E-19 | 0.328397689 | 0.318 | 0.124 |
| TEX10    | 4.75E-19 | 0.327317639 | 0.339 | 0.133 |
| GAS55    | 5.11E-19 | 0.394491494 | 0.93  | 0.685 |
| MLF2     | 5.31E-19 | 0.290563281 | 0.459 | 0.211 |
| PUS101   | 5.36E-19 | 0.421262048 | 0.281 | 0.105 |
| NDUFA71  | 7.89E-19 | 0.371273597 | 0.504 | 0.249 |
| EWSR1    | 8.08E-19 | 0.414262632 | 0.686 | 0.394 |
| SMAD5    | 8.21E-19 | 0.278644158 | 0.252 | 0.087 |
| PRMT12   | 9.34E-19 | 0.471257743 | 0.508 | 0.255 |
| CYBC1    | 1.13E-18 | 0.393587234 | 0.471 | 0.221 |
| PPP3CA3  | 1.36E-18 | 0.468051548 | 0.777 | 0.469 |
| PTK2B2   | 1.37E-18 | 0.402373233 | 0.669 | 0.367 |
| EIF3H3   | 1.42E-18 | 0.418255396 | 0.921 | 0.679 |
| INSIG2   | 1.91E-18 | 0.44947248  | 0.322 | 0.132 |
| RERE2    | 1.99E-18 | 0.319289976 | 0.822 | 0.507 |
| C7orf502 | 2.11E-18 | 0.410859098 | 0.558 | 0.287 |
| RUNX12   | 2.18E-18 | 0.554354142 | 0.818 | 0.52  |
| CNNM4    | 2.27E-18 | 0.365732725 | 0.322 | 0.127 |

|            |          |             |       |       |
|------------|----------|-------------|-------|-------|
| NUCKS11    | 2.86E-18 | 0.491313943 | 0.818 | 0.553 |
| RTRAF1     | 2.87E-18 | 0.453916936 | 0.719 | 0.442 |
| BTF33      | 2.90E-18 | 0.505517247 | 0.926 | 0.804 |
| MAP2K22    | 2.91E-18 | 0.349350254 | 0.669 | 0.361 |
| ZNF586     | 2.94E-18 | 0.270822042 | 0.31  | 0.118 |
| DCTPP11    | 3.21E-18 | 0.272807583 | 0.285 | 0.106 |
| SLC41A22   | 3.26E-18 | 0.568601005 | 0.322 | 0.132 |
| AKAP8L     | 3.47E-18 | 0.36172382  | 0.558 | 0.28  |
| ALPK11     | 3.72E-18 | 0.313817032 | 0.281 | 0.106 |
| EIF3F2     | 3.96E-18 | 0.470746861 | 0.835 | 0.589 |
| PPP6R21    | 4.32E-18 | 0.49641451  | 0.57  | 0.306 |
| IKZF33     | 4.64E-18 | 0.352868538 | 0.764 | 0.424 |
| MRPS241    | 4.87E-18 | 0.37522768  | 0.587 | 0.31  |
| CCT31      | 5.10E-18 | 0.427121648 | 0.715 | 0.434 |
| NSRP1      | 5.53E-18 | 0.400025367 | 0.57  | 0.3   |
| C1D        | 5.71E-18 | 0.298549448 | 0.508 | 0.246 |
| TTC13      | 6.74E-18 | 0.292816327 | 0.293 | 0.11  |
| FIBP       | 7.15E-18 | 0.319635244 | 0.43  | 0.196 |
| C4orf31    | 7.17E-18 | 0.616848893 | 0.752 | 0.483 |
| WDR12      | 8.34E-18 | 0.31380081  | 0.566 | 0.287 |
| NDUFAB11   | 8.49E-18 | 0.306734394 | 0.612 | 0.313 |
| VHL        | 8.90E-18 | 0.271209971 | 0.368 | 0.155 |
| CLPTM1L1   | 9.21E-18 | 0.302291132 | 0.405 | 0.181 |
| EIF2AK42   | 1.07E-17 | 0.384116005 | 0.397 | 0.182 |
| CCNC       | 1.15E-17 | 0.284452747 | 0.479 | 0.227 |
| SNHG73     | 1.17E-17 | 0.379362904 | 0.636 | 0.347 |
| AL645568.1 | 1.20E-17 | 0.319248157 | 0.293 | 0.112 |
| RAB4A      | 1.28E-17 | 0.290307016 | 0.401 | 0.179 |
| ATP5MF2    | 1.28E-17 | 0.44389572  | 0.723 | 0.444 |
| C12orf76   | 1.36E-17 | 0.260650286 | 0.26  | 0.094 |
| PHAX       | 1.42E-17 | 0.3234663   | 0.43  | 0.195 |
| CPM2       | 1.44E-17 | 0.486304044 | 0.318 | 0.131 |
| DARS       | 1.48E-17 | 0.318556731 | 0.624 | 0.337 |
| ARL14EP    | 1.59E-17 | 0.26465127  | 0.38  | 0.162 |
| MRPS15     | 1.60E-17 | 0.318178643 | 0.496 | 0.244 |
| SEPTIN2    | 1.73E-17 | 0.418474787 | 0.702 | 0.411 |
| NPM12      | 1.92E-17 | 0.440091503 | 0.959 | 0.849 |
| HNRNPM1    | 2.45E-17 | 0.441074853 | 0.81  | 0.539 |
| DMAC2L     | 2.46E-17 | 0.250063008 | 0.293 | 0.112 |
| SF3A2      | 2.61E-17 | 0.299467667 | 0.306 | 0.12  |
| PLCL21     | 2.64E-17 | 0.577059223 | 0.628 | 0.362 |
| THRAP31    | 2.73E-17 | 0.383010556 | 0.847 | 0.568 |
| EED1       | 2.91E-17 | 0.349548399 | 0.438 | 0.2   |

|            |          |             |       |       |
|------------|----------|-------------|-------|-------|
| ACO2       | 3.16E-17 | 0.338045488 | 0.459 | 0.219 |
| MRPS361    | 3.19E-17 | 0.363804456 | 0.5   | 0.248 |
| VRK1       | 3.36E-17 | 0.26872613  | 0.31  | 0.121 |
| DUT1       | 3.47E-17 | 0.689395162 | 0.496 | 0.262 |
| BLOC1S21   | 3.63E-17 | 0.362805884 | 0.537 | 0.272 |
| HNRNPA2B11 | 3.66E-17 | 0.429029152 | 0.963 | 0.853 |
| UBE2D22    | 3.86E-17 | 0.393399482 | 0.872 | 0.621 |
| UTP62      | 3.93E-17 | 0.26773372  | 0.409 | 0.186 |
| IGBP11     | 4.23E-17 | 0.368918286 | 0.653 | 0.372 |
| NF11       | 4.61E-17 | 0.447280019 | 0.723 | 0.417 |
| MCPH11     | 4.75E-17 | 0.341330481 | 0.537 | 0.27  |
| ESD        | 5.26E-17 | 0.279154895 | 0.45  | 0.209 |
| COMMD1     | 5.32E-17 | 0.454748341 | 0.657 | 0.357 |
| PPP6R1     | 5.58E-17 | 0.28240848  | 0.434 | 0.199 |
| COTL14     | 5.71E-17 | 0.342106659 | 0.876 | 0.554 |
| TIMM13     | 5.86E-17 | 0.31802498  | 0.426 | 0.2   |
| GMFB       | 5.89E-17 | 0.272363828 | 0.331 | 0.137 |
| R3HDM11    | 5.92E-17 | 0.296638503 | 0.517 | 0.252 |
| AC006001.2 | 6.35E-17 | 0.35991912  | 0.273 | 0.105 |
| POLR1D1    | 6.45E-17 | 0.338971606 | 0.752 | 0.45  |
| IDH21      | 6.50E-17 | 0.526449815 | 0.512 | 0.265 |
| SGK14      | 6.79E-17 | 0.252715975 | 0.467 | 0.215 |
| INO801     | 7.55E-17 | 0.457239894 | 0.595 | 0.326 |
| TFDP11     | 7.96E-17 | 0.329735388 | 0.351 | 0.15  |
| TLE43      | 8.92E-17 | 0.721695472 | 0.682 | 0.427 |
| MTDH       | 9.54E-17 | 0.428966845 | 0.88  | 0.638 |
| SMYD33     | 9.71E-17 | 0.33168381  | 0.86  | 0.549 |
| SH2B35     | 1.04E-16 | 0.311284129 | 0.483 | 0.225 |
| CNST3      | 1.05E-16 | 0.29640158  | 0.669 | 0.356 |
| ZMYND81    | 1.11E-16 | 0.365605965 | 0.517 | 0.263 |
| PSMD41     | 1.11E-16 | 0.318409459 | 0.554 | 0.292 |
| RAB14      | 1.13E-16 | 0.337085469 | 0.649 | 0.357 |
| RBX12      | 1.27E-16 | 0.366472885 | 0.723 | 0.421 |
| PDSS11     | 1.28E-16 | 0.285059647 | 0.26  | 0.098 |
| PANK2      | 1.31E-16 | 0.30222221  | 0.521 | 0.262 |
| STOML2     | 1.36E-16 | 0.284413084 | 0.372 | 0.165 |
| LSM51      | 1.39E-16 | 0.301552539 | 0.517 | 0.26  |
| NIP7       | 1.41E-16 | 0.281849497 | 0.318 | 0.129 |
| ZFP36L15   | 1.56E-16 | 0.463565365 | 0.769 | 0.5   |
| CPEB31     | 1.57E-16 | 0.367093738 | 0.421 | 0.196 |
| UBQLN1     | 1.61E-16 | 0.400111952 | 0.616 | 0.339 |
| TESK2      | 1.67E-16 | 0.30622326  | 0.273 | 0.105 |
| ATF7IP23   | 1.68E-16 | 0.313573597 | 0.591 | 0.312 |

|            |          |             |       |       |
|------------|----------|-------------|-------|-------|
| ATG16L1    | 1.87E-16 | 0.302367217 | 0.426 | 0.195 |
| RAD51B2    | 1.88E-16 | 0.450862963 | 0.653 | 0.372 |
| ATP6V1G12  | 1.94E-16 | 0.525365034 | 0.822 | 0.593 |
| MRPL16     | 2.13E-16 | 0.257558389 | 0.347 | 0.148 |
| H2AFZ3     | 2.20E-16 | 0.702078173 | 0.855 | 0.608 |
| NAP1L13    | 2.30E-16 | 0.434098685 | 0.901 | 0.682 |
| GTF2H13    | 2.34E-16 | 0.368121807 | 0.492 | 0.249 |
| ELAVL1     | 2.82E-16 | 0.309109884 | 0.421 | 0.2   |
| RAD9A      | 2.83E-16 | 0.330578226 | 0.318 | 0.132 |
| ARPC5L2    | 2.90E-16 | 0.368041185 | 0.533 | 0.281 |
| LNPEP1     | 2.92E-16 | 0.350427564 | 0.599 | 0.325 |
| RASSF24    | 2.92E-16 | 0.255337665 | 0.405 | 0.184 |
| CCDC18-AS1 | 3.02E-16 | 0.271951214 | 0.475 | 0.227 |
| RPIA       | 3.08E-16 | 0.263220322 | 0.31  | 0.125 |
| DOP1A      | 3.17E-16 | 0.310269648 | 0.409 | 0.185 |
| PTDSS11    | 3.20E-16 | 0.255034567 | 0.413 | 0.188 |
| FBXW72     | 3.25E-16 | 0.342242333 | 0.835 | 0.565 |
| HADHB1     | 3.84E-16 | 0.296691569 | 0.55  | 0.283 |
| SRSF101    | 3.98E-16 | 0.422409834 | 0.847 | 0.564 |
| WASHC2A1   | 4.15E-16 | 0.462744298 | 0.426 | 0.205 |
| IL21R2     | 4.40E-16 | 0.350442446 | 0.517 | 0.26  |
| INPP5A3    | 4.50E-16 | 0.267510786 | 0.504 | 0.247 |
| MPC22      | 4.53E-16 | 0.3532705   | 0.583 | 0.31  |
| MDFIC1     | 4.54E-16 | 0.456884875 | 0.645 | 0.358 |
| ARGLU1     | 4.69E-16 | 0.42743335  | 0.868 | 0.602 |
| PLEKHM23   | 5.17E-16 | 0.329708368 | 0.463 | 0.23  |
| TBPL1      | 5.29E-16 | 0.41383998  | 0.376 | 0.165 |
| HEIH1      | 5.51E-16 | 0.322881902 | 0.277 | 0.114 |
| POLA1      | 5.54E-16 | 0.387965011 | 0.256 | 0.097 |
| NFAT54     | 5.71E-16 | 0.805463733 | 0.798 | 0.55  |
| SLC5A31    | 5.82E-16 | 0.342244145 | 0.442 | 0.21  |
| TNPO31     | 6.20E-16 | 0.366153162 | 0.612 | 0.331 |
| ELMO13     | 6.25E-16 | 0.390422125 | 0.926 | 0.699 |
| PSMA22     | 6.34E-16 | 0.390083608 | 0.715 | 0.448 |
| ILF31      | 6.43E-16 | 0.384753513 | 0.62  | 0.354 |
| ATP5IF11   | 7.08E-16 | 0.460280619 | 0.74  | 0.507 |
| UBA2       | 8.02E-16 | 0.26390635  | 0.558 | 0.284 |
| COX7C2     | 8.28E-16 | 0.395738249 | 0.921 | 0.788 |
| ZMYM41     | 8.78E-16 | 0.31027105  | 0.417 | 0.197 |
| TRIM13     | 8.84E-16 | 0.256712854 | 0.38  | 0.168 |
| NCBP3      | 9.16E-16 | 0.279294917 | 0.421 | 0.193 |
| RACK14     | 9.24E-16 | 0.393562213 | 0.971 | 0.893 |
| SET3       | 9.73E-16 | 0.461337498 | 0.802 | 0.565 |

|          |          |             |       |       |
|----------|----------|-------------|-------|-------|
| PRCP3    | 1.01E-15 | 0.928150321 | 0.388 | 0.199 |
| FBXO31   | 1.01E-15 | 0.253170183 | 0.26  | 0.099 |
| GNG54    | 1.06E-15 | 0.417737726 | 0.748 | 0.484 |
| PHTF23   | 1.27E-15 | 0.290862527 | 0.69  | 0.39  |
| TRIM261  | 1.28E-15 | 0.282693672 | 0.488 | 0.244 |
| COX6C1   | 1.30E-15 | 0.441675421 | 0.818 | 0.613 |
| HNRNPR1  | 1.34E-15 | 0.361316412 | 0.769 | 0.459 |
| CD525    | 1.34E-15 | 0.69146058  | 0.876 | 0.671 |
| CBX31    | 1.39E-15 | 0.381012737 | 0.707 | 0.432 |
| HNRNPK2  | 1.41E-15 | 0.3986717   | 0.888 | 0.647 |
| SRSF4    | 1.48E-15 | 0.413222671 | 0.764 | 0.492 |
| TNKS     | 1.56E-15 | 0.282763899 | 0.657 | 0.356 |
| COX6A12  | 1.63E-15 | 0.405750676 | 0.802 | 0.577 |
| CD242    | 1.63E-15 | 0.310674525 | 0.256 | 0.097 |
| ATP5ME1  | 1.63E-15 | 0.326375314 | 0.736 | 0.454 |
| FKBP1A3  | 1.65E-15 | 0.291972776 | 0.669 | 0.373 |
| TAF9     | 1.67E-15 | 0.26028351  | 0.364 | 0.163 |
| CARD8    | 1.73E-15 | 0.327064269 | 0.508 | 0.26  |
| RBM231   | 1.78E-15 | 0.335230834 | 0.686 | 0.395 |
| TUBB4    | 1.91E-15 | 0.582843679 | 0.517 | 0.283 |
| SLC25A64 | 2.05E-15 | 0.362809699 | 0.901 | 0.707 |
| ELOA     | 2.51E-15 | 0.288668452 | 0.343 | 0.151 |
| UBTF     | 2.52E-15 | 0.270347122 | 0.434 | 0.206 |
| VCPIP1   | 3.18E-15 | 0.270297939 | 0.351 | 0.155 |
| MRPS341  | 3.20E-15 | 0.294380802 | 0.496 | 0.255 |
| ERGIC12  | 3.51E-15 | 0.312522265 | 0.525 | 0.28  |
| TAGAP1   | 3.58E-15 | 0.33754102  | 0.69  | 0.405 |
| EIF3L4   | 3.76E-15 | 0.376968528 | 0.649 | 0.388 |
| DCTN31   | 4.20E-15 | 0.289057042 | 0.529 | 0.278 |
| AHSA12   | 4.54E-15 | 0.357327353 | 0.674 | 0.399 |
| CPQ3     | 4.83E-15 | 0.258393993 | 0.442 | 0.216 |
| COA1     | 5.26E-15 | 0.279662156 | 0.591 | 0.313 |
| USP331   | 5.39E-15 | 0.262301509 | 0.558 | 0.29  |
| GRK2     | 5.84E-15 | 0.256002639 | 0.508 | 0.258 |
| EVI54    | 5.85E-15 | 0.297405626 | 0.405 | 0.194 |
| LPXN2    | 5.86E-15 | 0.353694485 | 0.748 | 0.449 |
| EIF1B3   | 5.88E-15 | 0.360605339 | 0.665 | 0.394 |
| RCBTB2   | 5.91E-15 | 0.275284344 | 0.252 | 0.099 |
| AKIRIN21 | 6.04E-15 | 0.303714447 | 0.678 | 0.385 |
| DANCR1   | 6.34E-15 | 0.289457605 | 0.479 | 0.236 |
| POGZ1    | 6.35E-15 | 0.273214167 | 0.475 | 0.235 |
| SELENOF1 | 6.40E-15 | 0.39548858  | 0.731 | 0.45  |
| MAN1A13  | 6.43E-15 | 0.727870152 | 0.69  | 0.456 |



|             |          |             |       |       |
|-------------|----------|-------------|-------|-------|
| ARPC55      | 7.02E-15 | 0.431580039 | 0.798 | 0.522 |
| CSNK2B2     | 7.04E-15 | 0.294796593 | 0.595 | 0.328 |
| THUMPD3-AS1 | 8.87E-15 | 0.342558565 | 0.595 | 0.327 |
| CLEC2D3     | 9.16E-15 | 0.293437163 | 0.847 | 0.536 |
| TNS32       | 9.58E-15 | 0.286592578 | 0.376 | 0.176 |
| CDK2AP21    | 1.01E-14 | 0.303501186 | 0.463 | 0.238 |
| ATP5F1C2    | 1.10E-14 | 0.303359486 | 0.69  | 0.395 |
| ARID1A      | 1.12E-14 | 0.307674362 | 0.508 | 0.269 |
| GGCT        | 1.19E-14 | 0.332361055 | 0.289 | 0.124 |
| HERC2       | 1.28E-14 | 0.255987262 | 0.434 | 0.211 |
| TPM44       | 1.44E-14 | 0.3413286   | 0.74  | 0.454 |
| YBX14       | 1.58E-14 | 0.356797974 | 0.946 | 0.774 |
| STRAP1      | 1.80E-14 | 0.299674419 | 0.669 | 0.387 |
| RPGR        | 1.83E-14 | 0.393932831 | 0.298 | 0.129 |
| RBM35       | 1.84E-14 | 0.401701668 | 0.806 | 0.565 |
| MMADHC1     | 1.96E-14 | 0.270244483 | 0.479 | 0.247 |
| CCT51       | 2.02E-14 | 0.293171463 | 0.607 | 0.339 |
| DERA        | 2.07E-14 | 0.262085412 | 0.31  | 0.136 |
| MRPL4       | 2.46E-14 | 0.263515641 | 0.364 | 0.168 |
| DDT2        | 2.59E-14 | 0.320820714 | 0.669 | 0.39  |
| CAP15       | 2.69E-14 | 0.314685798 | 0.74  | 0.462 |
| RRAGC       | 2.73E-14 | 0.287317626 | 0.285 | 0.121 |
| ATP6V0D14   | 2.75E-14 | 0.276256244 | 0.562 | 0.301 |
| NUBPL       | 2.81E-14 | 0.305211851 | 0.335 | 0.15  |
| REEP52      | 2.84E-14 | 0.326501666 | 0.727 | 0.443 |
| MZT2B1      | 3.07E-14 | 0.484329186 | 0.789 | 0.605 |
| AC027097.21 | 3.30E-14 | 0.319938613 | 0.252 | 0.1   |
| ZBTB103     | 3.44E-14 | 0.301740533 | 0.409 | 0.196 |
| COX7A2L2    | 3.55E-14 | 0.316177334 | 0.624 | 0.359 |
| GNAS1       | 3.73E-14 | 0.331111267 | 0.971 | 0.869 |
| SEPTIN94    | 3.89E-14 | 0.284916897 | 0.748 | 0.451 |
| FAM126A     | 3.98E-14 | 0.280006136 | 0.471 | 0.235 |
| MRPL111     | 4.12E-14 | 0.286606352 | 0.388 | 0.188 |
| TRAPPC82    | 4.49E-14 | 0.294968963 | 0.483 | 0.247 |
| IL12RB1     | 4.71E-14 | 0.256290755 | 0.264 | 0.107 |
| WDFY22      | 4.75E-14 | 0.592722519 | 0.529 | 0.302 |
| SYNE25      | 5.52E-14 | 0.300220501 | 0.901 | 0.594 |
| SYF22       | 6.00E-14 | 0.311694322 | 0.785 | 0.503 |
| UQCR101     | 6.27E-14 | 0.347410605 | 0.731 | 0.483 |
| ATG4B       | 6.28E-14 | 0.3513902   | 0.397 | 0.196 |
| CLTA3       | 6.30E-14 | 0.423171269 | 0.731 | 0.461 |
| PNKD        | 6.62E-14 | 0.263557259 | 0.413 | 0.204 |
| PPP1R12A2   | 6.87E-14 | 0.458442184 | 0.855 | 0.617 |

|          |          |             |       |       |
|----------|----------|-------------|-------|-------|
| ELOB     | 8.08E-14 | 0.348307628 | 0.822 | 0.568 |
| SNRPF1   | 8.48E-14 | 0.408473415 | 0.645 | 0.384 |
| PPP3CB   | 8.59E-14 | 0.285105992 | 0.479 | 0.247 |
| ATP5PB2  | 9.30E-14 | 0.317446419 | 0.612 | 0.357 |
| BCL2L131 | 9.65E-14 | 0.257955009 | 0.368 | 0.174 |
| LYSMD21  | 1.01E-13 | 0.297924012 | 0.335 | 0.152 |
| CLINT11  | 1.07E-13 | 0.323499208 | 0.653 | 0.38  |
| RIOK3    | 1.08E-13 | 0.282840094 | 0.657 | 0.374 |
| IRF2     | 1.10E-13 | 0.307701273 | 0.533 | 0.289 |
| MRPS61   | 1.20E-13 | 0.304620671 | 0.645 | 0.381 |
| TBC1D52  | 1.25E-13 | 0.302165759 | 0.851 | 0.555 |
| MFSD14B  | 1.26E-13 | 0.251154929 | 0.405 | 0.198 |
| KDM5A1   | 1.30E-13 | 0.317697011 | 0.727 | 0.451 |
| FAM241A  | 1.50E-13 | 0.366397889 | 0.331 | 0.151 |
| NUDT21   | 1.50E-13 | 0.265159361 | 0.417 | 0.208 |
| NUDT1    | 1.53E-13 | 0.291758605 | 0.368 | 0.177 |
| IQCB11   | 1.79E-13 | 0.267591534 | 0.5   | 0.26  |
| HNRNPC2  | 1.83E-13 | 0.361851644 | 0.963 | 0.851 |
| NDUFA111 | 2.01E-13 | 0.321739475 | 0.715 | 0.461 |
| SLC30A9  | 2.27E-13 | 0.354288876 | 0.45  | 0.239 |
| SPEN1    | 2.77E-13 | 0.36583519  | 0.521 | 0.293 |
| NAA502   | 3.08E-13 | 0.29652823  | 0.707 | 0.425 |
| CHCHD104 | 3.30E-13 | 0.372273329 | 0.62  | 0.376 |
| EIF4H1   | 3.59E-13 | 0.290588587 | 0.632 | 0.375 |
| SLC2A132 | 3.73E-13 | 0.435208709 | 0.285 | 0.126 |
| EIF4G32  | 4.08E-13 | 0.278638501 | 0.752 | 0.472 |
| COMMD103 | 4.45E-13 | 0.311434462 | 0.645 | 0.388 |
| COX6B13  | 4.53E-13 | 0.323747088 | 0.851 | 0.615 |
| ZNF1481  | 4.55E-13 | 0.336867078 | 0.69  | 0.435 |
| PCBP22   | 4.82E-13 | 0.290717484 | 0.814 | 0.542 |
| RPA31    | 5.07E-13 | 0.358841069 | 0.537 | 0.305 |
| ZNF6091  | 5.09E-13 | 0.335209206 | 0.566 | 0.323 |
| CHD4     | 5.11E-13 | 0.273447185 | 0.554 | 0.315 |
| SF3B61   | 5.70E-13 | 0.31410498  | 0.694 | 0.438 |
| DOCK22   | 6.14E-13 | 0.339962026 | 0.839 | 0.583 |
| UBE2A2   | 6.69E-13 | 0.251540984 | 0.603 | 0.345 |
| LRPPRC1  | 8.18E-13 | 0.291370309 | 0.504 | 0.269 |
| ATP5MPL1 | 8.69E-13 | 0.320728989 | 0.69  | 0.443 |
| SNX252   | 8.97E-13 | 0.459249549 | 0.558 | 0.32  |
| SUGT1    | 9.07E-13 | 0.26114363  | 0.57  | 0.324 |
| HMG32    | 9.26E-13 | 0.270369996 | 0.533 | 0.298 |
| ASH1L1   | 1.06E-12 | 0.450433829 | 0.826 | 0.615 |
| ECHDC11  | 1.11E-12 | 0.318143472 | 0.508 | 0.283 |

|             |          |             |       |       |
|-------------|----------|-------------|-------|-------|
| ADCY33      | 1.21E-12 | 0.369912621 | 0.293 | 0.135 |
| SP140L2     | 1.21E-12 | 0.291278683 | 0.599 | 0.342 |
| POLR2J3     | 1.34E-12 | 0.286565404 | 0.467 | 0.244 |
| TENT4A1     | 1.64E-12 | 0.380707284 | 0.409 | 0.218 |
| DDX171      | 1.69E-12 | 0.306097511 | 0.893 | 0.64  |
| MAPK1IP1L1  | 1.71E-12 | 0.310729648 | 0.694 | 0.416 |
| DDX61       | 1.72E-12 | 0.3760135   | 0.76  | 0.533 |
| CHCHD1      | 1.86E-12 | 0.256688981 | 0.417 | 0.218 |
| CBWD1       | 1.98E-12 | 0.270027702 | 0.285 | 0.131 |
| SNU133      | 2.02E-12 | 0.272980648 | 0.86  | 0.603 |
| SYTL1       | 2.08E-12 | 0.253819982 | 0.339 | 0.16  |
| ANKRD172    | 2.15E-12 | 0.303221329 | 0.822 | 0.569 |
| CEP85L2     | 2.19E-12 | 0.372847668 | 0.628 | 0.388 |
| SYNCRIP1    | 2.31E-12 | 0.287539368 | 0.645 | 0.387 |
| NFKBID5     | 2.50E-12 | 0.329896765 | 0.43  | 0.225 |
| WASHC2C     | 2.74E-12 | 0.322545826 | 0.397 | 0.204 |
| PSMD131     | 2.83E-12 | 0.258181669 | 0.521 | 0.292 |
| KTN1        | 3.17E-12 | 0.315213571 | 0.781 | 0.525 |
| DEK2        | 3.20E-12 | 0.447402847 | 0.802 | 0.552 |
| HIP13       | 3.28E-12 | 0.330200614 | 0.347 | 0.173 |
| HADHA1      | 3.44E-12 | 0.273738987 | 0.616 | 0.36  |
| CHORDC12    | 3.52E-12 | 0.439079059 | 0.715 | 0.497 |
| SNX13       | 4.14E-12 | 0.252647272 | 0.438 | 0.228 |
| SFPQ1       | 4.26E-12 | 0.377973202 | 0.905 | 0.69  |
| FBXO113     | 4.32E-12 | 0.311552644 | 0.814 | 0.542 |
| MSL21       | 4.48E-12 | 0.45222381  | 0.566 | 0.34  |
| MIR181A1HG3 | 4.83E-12 | 0.270140457 | 0.376 | 0.183 |
| RPA1        | 5.30E-12 | 0.270788395 | 0.256 | 0.111 |
| UTY4        | 5.33E-12 | 0.417748214 | 0.579 | 0.356 |
| FAM192A     | 5.98E-12 | 0.273826194 | 0.442 | 0.235 |
| ZFAS13      | 6.84E-12 | 0.317121022 | 0.917 | 0.753 |
| TCOF14      | 7.00E-12 | 0.284912462 | 0.376 | 0.186 |
| NDUFA4      | 7.26E-12 | 0.371253377 | 0.88  | 0.656 |
| SMC42       | 7.60E-12 | 0.360708015 | 0.496 | 0.278 |
| ASXL13      | 8.06E-12 | 0.367937399 | 0.777 | 0.511 |
| SUPT16H     | 8.35E-12 | 0.277787744 | 0.508 | 0.287 |
| NDUFA122    | 8.81E-12 | 0.272027337 | 0.603 | 0.365 |
| AC007384.12 | 8.89E-12 | 0.341969292 | 0.702 | 0.445 |
| TBCA2       | 9.02E-12 | 0.423555997 | 0.723 | 0.517 |
| SH3TC11     | 9.76E-12 | 0.364604665 | 0.339 | 0.17  |
| SYAP1       | 1.17E-11 | 0.299999142 | 0.789 | 0.555 |
| ZBTB8OS1    | 1.27E-11 | 0.341454951 | 0.438 | 0.247 |
| SDE21       | 1.28E-11 | 0.261264252 | 0.376 | 0.193 |

|          |          |             |       |       |
|----------|----------|-------------|-------|-------|
| PDE4D2   | 1.41E-11 | 0.614096603 | 0.711 | 0.52  |
| CYTIP2   | 1.48E-11 | 0.286894801 | 0.959 | 0.758 |
| EIF4B3   | 1.72E-11 | 0.27458893  | 0.773 | 0.533 |
| AP1G11   | 1.77E-11 | 0.257181549 | 0.595 | 0.355 |
| YWHAE1   | 1.92E-11 | 0.328076867 | 0.756 | 0.519 |
| NDUFA131 | 1.98E-11 | 0.2812681   | 0.88  | 0.653 |
| ZNF101   | 2.28E-11 | 0.45097052  | 0.554 | 0.325 |
| SMC3     | 2.34E-11 | 0.302139078 | 0.541 | 0.308 |
| NDUFA21  | 2.40E-11 | 0.297581377 | 0.583 | 0.353 |
| VASP5    | 2.73E-11 | 0.252889561 | 0.574 | 0.337 |
| PNRC2    | 2.73E-11 | 0.268570465 | 0.628 | 0.37  |
| UBE2I2   | 2.85E-11 | 0.301251355 | 0.665 | 0.429 |
| SLC35D11 | 2.88E-11 | 0.29242785  | 0.38  | 0.193 |
| SOS1     | 3.24E-11 | 0.325209663 | 0.669 | 0.428 |
| RFX3-AS1 | 3.69E-11 | 0.331876406 | 0.36  | 0.183 |
| SPCS21   | 3.76E-11 | 0.31655926  | 0.769 | 0.517 |
| KARS     | 3.77E-11 | 0.268581877 | 0.36  | 0.186 |
| ST132    | 3.98E-11 | 0.280736018 | 0.752 | 0.506 |
| PAN32    | 4.56E-11 | 0.301537647 | 0.802 | 0.538 |
| EIF3M1   | 4.77E-11 | 0.271980911 | 0.723 | 0.467 |
| OLA11    | 4.82E-11 | 0.257583384 | 0.587 | 0.355 |
| RALY     | 5.68E-11 | 0.322898892 | 0.756 | 0.507 |
| CIRBP5   | 5.96E-11 | 0.304882338 | 0.901 | 0.713 |
| NKTR2    | 6.11E-11 | 0.362433741 | 0.698 | 0.474 |
| RANBP11  | 6.15E-11 | 0.369302945 | 0.496 | 0.295 |
| ATP5PO2  | 6.18E-11 | 0.256909584 | 0.727 | 0.483 |
| REL4     | 7.76E-11 | 0.315396319 | 0.913 | 0.666 |
| APLP23   | 8.12E-11 | 0.277008899 | 0.657 | 0.408 |
| PSMB11   | 8.22E-11 | 0.295255595 | 0.764 | 0.53  |
| ATAD2B2  | 9.47E-11 | 0.378116082 | 0.554 | 0.33  |
| CHCHD31  | 1.07E-10 | 0.251310509 | 0.587 | 0.357 |
| EVI2B1   | 1.79E-10 | 0.320391648 | 0.748 | 0.522 |
| SEM12    | 2.13E-10 | 0.263688215 | 0.694 | 0.462 |
| COPE1    | 2.17E-10 | 0.291926293 | 0.781 | 0.546 |
| CALM32   | 2.21E-10 | 0.355487608 | 0.624 | 0.394 |
| PPP4R3A2 | 2.36E-10 | 0.329400529 | 0.748 | 0.501 |
| ABHD31   | 2.48E-10 | 0.304769948 | 0.562 | 0.331 |
| ANP32E2  | 2.85E-10 | 0.279305886 | 0.521 | 0.314 |
| NOP582   | 2.88E-10 | 0.256920968 | 0.851 | 0.622 |
| UBE2L31  | 3.07E-10 | 0.28854719  | 0.719 | 0.479 |
| RNF111   | 3.27E-10 | 0.254186519 | 0.554 | 0.33  |
| TXNL4A1  | 3.59E-10 | 0.254444326 | 0.55  | 0.333 |
| GNB12    | 4.01E-10 | 0.342407542 | 0.822 | 0.588 |

|           |          |             |       |       |
|-----------|----------|-------------|-------|-------|
| HNRNPA31  | 4.39E-10 | 0.312323756 | 0.855 | 0.663 |
| ANKRD113  | 4.51E-10 | 0.533350324 | 0.872 | 0.742 |
| LSM31     | 4.66E-10 | 0.283309061 | 0.521 | 0.32  |
| RAC23     | 4.93E-10 | 0.291361545 | 0.798 | 0.552 |
| UBR51     | 5.40E-10 | 0.278900795 | 0.711 | 0.459 |
| ZC3H151   | 5.96E-10 | 0.262952456 | 0.665 | 0.446 |
| TACC31    | 6.95E-10 | 0.279517568 | 0.322 | 0.165 |
| CAPZB4    | 8.10E-10 | 0.257833457 | 0.826 | 0.583 |
| SLC39A112 | 8.16E-10 | 0.259561556 | 0.442 | 0.255 |
| NSD2      | 1.19E-09 | 0.352731529 | 0.318 | 0.167 |
| PAIP21    | 1.36E-09 | 0.253573504 | 0.756 | 0.532 |
| TBL1XR12  | 1.44E-09 | 0.277822169 | 0.69  | 0.467 |
| ADNP      | 1.54E-09 | 0.256500088 | 0.64  | 0.405 |
| SMG13     | 1.69E-09 | 0.264179509 | 0.702 | 0.468 |
| JAK11     | 1.84E-09 | 0.260105643 | 0.959 | 0.785 |
| TAF151    | 2.08E-09 | 0.298775808 | 0.694 | 0.477 |
| CCDC88C2  | 2.27E-09 | 0.27827268  | 0.64  | 0.415 |
| KDM4B3    | 2.39E-09 | 0.301086554 | 0.541 | 0.338 |
| ATF41     | 2.71E-09 | 0.265482385 | 0.731 | 0.495 |
| USP9X2    | 2.90E-09 | 0.267713757 | 0.744 | 0.499 |
| SRSF33    | 3.05E-09 | 0.299314303 | 0.921 | 0.759 |
| CLIP11    | 3.09E-09 | 0.398181488 | 0.512 | 0.325 |
| AGFG12    | 3.58E-09 | 0.343766173 | 0.57  | 0.374 |
| IARS      | 3.71E-09 | 0.252237171 | 0.401 | 0.224 |
| PUM11     | 3.83E-09 | 0.289213134 | 0.764 | 0.528 |
| RSRC21    | 6.84E-09 | 0.320993599 | 0.839 | 0.627 |
| YEATS2    | 8.11E-09 | 0.283205515 | 0.339 | 0.181 |
| SUZ12     | 8.31E-09 | 0.262048264 | 0.521 | 0.318 |
| NEDD81    | 1.04E-08 | 0.267242564 | 0.707 | 0.479 |
| PDS5A1    | 1.08E-08 | 0.250213687 | 0.707 | 0.482 |
| RAD21     | 1.16E-08 | 0.286451679 | 0.616 | 0.407 |
| CHCHD22   | 1.19E-08 | 0.268023728 | 0.888 | 0.768 |
| TMSB4X3   | 1.76E-08 | 0.288982479 | 0.975 | 0.952 |
| ERO1B1    | 1.86E-08 | 0.28179006  | 0.521 | 0.323 |
| PNISR     | 1.97E-08 | 0.27640136  | 0.744 | 0.523 |
| BTRC      | 3.44E-08 | 0.314980258 | 0.347 | 0.197 |
| CDC73     | 5.31E-08 | 0.26091673  | 0.645 | 0.439 |
| BIRC6     | 6.32E-08 | 0.259318681 | 0.831 | 0.647 |
| CREBBP3   | 9.49E-08 | 0.300262192 | 0.723 | 0.521 |
| PDS5B     | 9.74E-08 | 0.292080819 | 0.479 | 0.306 |
| FRYL1     | 1.93E-07 | 0.30062702  | 0.702 | 0.504 |
| LAMP13    | 6.98E-07 | 0.273739801 | 0.475 | 0.302 |
| ITPR24    | 1.97E-06 | 0.457275694 | 0.669 | 0.508 |

|           |             |             |       |       |
|-----------|-------------|-------------|-------|-------|
| RANBP92   | 8.29E-06    | 0.408555615 | 0.537 | 0.387 |
| HIST1H4C3 | 3.15E-05    | 0.789328092 | 0.533 | 0.393 |
| FOXP15    | 0.003768302 | 0.335652842 | 0.822 | 0.742 |

| p_val_adj | cluster | gene     |
|-----------|---------|----------|
| 0         | 0       | TSHZ2    |
| 0         | 0       | IL7R     |
| 0         | 0       | FAAH2    |
| 0         | 0       | CRYBG1   |
| 0         | 0       | ANK3     |
| 0         | 0       | BCL11B   |
| 0         | 0       | RORA     |
| 0         | 0       | ITK      |
| 0         | 0       | FYB1     |
| 0         | 0       | CMTM8    |
| 0         | 0       | BATF     |
| 0         | 0       | LEF1     |
| 0         | 0       | INPP4B   |
| 0         | 0       | TNIK     |
| 0         | 0       | CAMK4    |
| 0         | 0       | IL6ST    |
| 0         | 0       | ZNF831   |
| 0         | 0       | NDFIP1   |
| 0         | 0       | LEPROTL1 |
| 0         | 0       | ICOS     |
| 0         | 0       | PRKCA    |
| 0         | 0       | SPOCK2   |
| 0         | 0       | SARAF    |
| 0         | 0       | BTBD11   |
| 0         | 0       | KLRB1    |
| 0         | 0       | RAPGEF6  |
| 0         | 0       | MAF      |
| 0         | 0       | SERINC5  |
| 0         | 0       | LDLRAD4  |
| 0         | 0       | CNOT6L   |
| 0         | 0       | GIMAP7   |
| 0         | 0       | TBC1D4   |
| 0         | 0       | TNFSF8   |
| 0         | 0       | ABCC1    |
| 0         | 0       | CDC14A   |
| 0         | 0       | IKZF1    |
| 0         | 0       | CD2      |
| 0         | 0       | ICA1     |
| 0         | 0       | AP3M2    |
| 0         | 0       | FYN      |
| 0         | 0       | CD28     |

|   |   |            |
|---|---|------------|
| 0 | 0 | TC2N       |
| 0 | 0 | CD6        |
| 0 | 0 | HERC1      |
| 0 | 0 | TTC39C     |
| 0 | 0 | PBX4       |
| 0 | 0 | AC010609.1 |
| 0 | 0 | IPCEF1     |
| 0 | 0 | CD247      |
| 0 | 0 | FKBP5      |
| 0 | 0 | SAMHD1     |
| 0 | 0 | PLCL1      |
| 0 | 0 | AAK1       |
| 0 | 0 | LTB        |
| 0 | 0 | GPRIN3     |
| 0 | 0 | RNF125     |
| 0 | 0 | PPP2R5C    |
| 0 | 0 | MPP7       |
| 0 | 0 | RETREG1    |
| 0 | 0 | SYNE2      |
| 0 | 0 | TRBC2      |
| 0 | 0 | PIK3IP1    |
| 0 | 0 | TESPA1     |
| 0 | 0 | BICDL1     |
| 0 | 0 | TRAC       |
| 0 | 0 | IQGAP2     |
| 0 | 0 | EML4       |
| 0 | 0 | ETS1       |
| 0 | 0 | PITPNC1    |
| 0 | 0 | FXYD5      |
| 0 | 0 | PHACTR2    |
| 0 | 0 | ANKRD12    |
| 0 | 0 | PBXIP1     |
| 0 | 0 | CD3E       |
| 0 | 0 | TCF7       |
| 0 | 0 | IL32       |
| 0 | 0 | SKAP1      |
| 0 | 0 | RCAN3      |
| 0 | 0 | RNF19A     |
| 0 | 0 | CTLA4      |
| 0 | 0 | PDE3B      |
| 0 | 0 | PRKCH      |
| 0 | 0 | FOXP1      |
| 0 | 0 | PDCD4      |



|           |   |            |
|-----------|---|------------|
| 0         | 0 | SRGN       |
| 0         | 0 | CASK       |
| 0         | 0 | DUSP16     |
| 0         | 0 | FOXO1      |
| 0         | 0 | CD3D       |
| 0         | 0 | ARHGDIB    |
| 0         | 0 | CDC42SE2   |
| 0         | 0 | PTPRC      |
| 0         | 0 | TPT1       |
| 0         | 0 | CD3G       |
| 0         | 0 | MALAT1     |
| 3.39E-303 | 0 | CD5        |
| 2.81E-298 | 0 | PPP1R2     |
| 7.88E-298 | 0 | CELF2      |
| 6.13E-297 | 0 | EEF1A1     |
| 3.80E-295 | 0 | OXNAD1     |
| 3.68E-294 | 0 | DDX24      |
| 3.81E-289 | 0 | PRKCQ-AS1  |
| 6.48E-288 | 0 | TRBC1      |
| 7.08E-284 | 0 | AL136456.1 |
| 9.34E-284 | 0 | TSC22D3    |
| 2.53E-283 | 0 | RORA-AS1   |
| 4.17E-283 | 0 | STK4       |
| 2.44E-279 | 0 | ARID4B     |
| 2.05E-278 | 0 | LDHB       |
| 4.88E-275 | 0 | MBNL1      |
| 3.61E-274 | 0 | PRKCQ      |
| 4.30E-273 | 0 | TRAT1      |
| 1.68E-272 | 0 | EPC1       |
| 1.32E-270 | 0 | DOCK9      |
| 2.96E-270 | 0 | MRPL1      |
| 3.95E-270 | 0 | LINC00513  |
| 6.09E-270 | 0 | ARID5B     |
| 1.34E-269 | 0 | NAP1L4     |
| 7.47E-269 | 0 | CD96       |
| 3.74E-267 | 0 | TNFAIP3    |
| 4.06E-267 | 0 | DDX5       |
| 6.50E-267 | 0 | TLK1       |
| 2.16E-266 | 0 | GSPT1      |
| 1.33E-264 | 0 | SOD1       |
| 3.34E-261 | 0 | NR3C1      |
| 2.49E-259 | 0 | CREM       |
| 1.33E-254 | 0 | FAM177A1   |

|           |   |            |
|-----------|---|------------|
| 1.44E-250 | 0 | CRY1       |
| 6.90E-250 | 0 | THEMIS     |
| 1.35E-248 | 0 | C12orf57   |
| 1.17E-246 | 0 | CCDC66     |
| 8.28E-246 | 0 | SYTL3      |
| 1.46E-243 | 0 | RBMS1      |
| 9.48E-241 | 0 | ITM2A      |
| 3.85E-240 | 0 | UGP2       |
| 9.08E-239 | 0 | CYTH1      |
| 4.83E-238 | 0 | DOCK10     |
| 6.92E-238 | 0 | NCK2       |
| 1.58E-231 | 0 | ITPKB      |
| 9.73E-231 | 0 | OSBPL8     |
| 1.29E-230 | 0 | KLF12      |
| 1.84E-227 | 0 | CD7        |
| 9.89E-226 | 0 | AC026979.2 |
| 1.05E-224 | 0 | LCK        |
| 2.78E-224 | 0 | SELL       |
| 1.98E-223 | 0 | ODF2L      |
| 2.61E-222 | 0 | PCBP3      |
| 3.49E-218 | 0 | CD4        |
| 2.04E-216 | 0 | ZC3HAV1    |
| 1.34E-213 | 0 | LINC01578  |
| 3.42E-212 | 0 | PVT1       |
| 4.18E-212 | 0 | STAT3      |
| 5.08E-210 | 0 | EIF1       |
| 1.61E-208 | 0 | CCR6       |
| 1.20E-207 | 0 | FAM107B    |
| 1.23E-207 | 0 | MAP3K5     |
| 1.79E-204 | 0 | ZFP36L2    |
| 4.23E-203 | 0 | IL18R1     |
| 5.90E-203 | 0 | HECA       |
| 1.50E-201 | 0 | TNFRSF4    |
| 2.92E-201 | 0 | STAT4      |
| 3.07E-201 | 0 | SESN3      |
| 1.92E-199 | 0 | ZC3H12D    |
| 2.89E-198 | 0 | TXK        |
| 3.96E-197 | 0 | LAT        |
| 5.91E-196 | 0 | CCR7       |
| 2.74E-195 | 0 | B2M        |
| 3.27E-194 | 0 | STK17B     |
| 5.88E-194 | 0 | TIGIT      |
| 4.38E-190 | 0 | ABLIM1     |

|           |   |            |
|-----------|---|------------|
| 4.02E-188 | 0 | ZEB1       |
| 5.20E-187 | 0 | HNRNPLL    |
| 2.61E-186 | 0 | MLLT3      |
| 9.36E-186 | 0 | MGAT4A     |
| 1.05E-185 | 0 | AP000787.1 |
| 4.21E-185 | 0 | SMCHD1     |
| 1.49E-183 | 0 | CALM1      |
| 2.19E-183 | 0 | GLCCI1     |
| 1.24E-182 | 0 | EEF1D      |
| 3.57E-182 | 0 | CCSER2     |
| 1.22E-181 | 0 | EVL        |
| 1.11E-180 | 0 | TSPAN5     |
| 1.23E-180 | 0 | MFHAS1     |
| 8.57E-178 | 0 | CEMIP2     |
| 1.30E-177 | 0 | EPB41      |
| 1.49E-177 | 0 | SEPTIN6    |
| 2.15E-176 | 0 | MPZL3      |
| 6.14E-174 | 0 | CXCR4      |
| 1.28E-173 | 0 | CNST       |
| 2.39E-173 | 0 | CCNH       |
| 2.17E-172 | 0 | ARL4C      |
| 1.66E-171 | 0 | LINC01619  |
| 8.60E-170 | 0 | N4BP2L2    |
| 3.11E-168 | 0 | TMEM173    |
| 9.30E-165 | 0 | TOMM7      |
| 4.15E-162 | 0 | FAM118A    |
| 3.54E-160 | 0 | GIMAP5     |
| 5.18E-160 | 0 | PCNX1      |
| 1.21E-159 | 0 | LIME1      |
| 4.50E-158 | 0 | PGAP1      |
| 5.02E-158 | 0 | PABPC1     |
| 4.63E-157 | 0 | MAP3K4     |
| 2.12E-155 | 0 | SF1        |
| 3.69E-155 | 0 | PER1       |
| 1.89E-154 | 0 | PPP1CB     |
| 4.55E-154 | 0 | PATJ       |
| 1.32E-150 | 0 | CIRBP      |
| 1.28E-149 | 0 | CLEC2D     |
| 3.13E-147 | 0 | NIBAN1     |
| 3.55E-147 | 0 | YWHAB      |
| 1.72E-146 | 0 | NAP1L1     |
| 4.39E-145 | 0 | LRRC8C     |
| 3.74E-144 | 0 | ARHGEF3    |

|           |   |            |
|-----------|---|------------|
| 1.15E-143 | 0 | ESYT2      |
| 4.11E-141 | 0 | BTG1       |
| 1.37E-139 | 0 | STAT5B     |
| 2.41E-139 | 0 | RSBN1      |
| 4.42E-139 | 0 | RAP1A      |
| 1.94E-138 | 0 | SRSF5      |
| 7.88E-138 | 0 | GPCPD1     |
| 1.39E-136 | 0 | NDUFV2     |
| 8.93E-136 | 0 | OGDH       |
| 3.07E-135 | 0 | SRSF7      |
| 1.06E-134 | 0 | AP001011.1 |
| 1.08E-133 | 0 | NOP58      |
| 4.04E-130 | 0 | USP3-AS1   |
| 2.38E-129 | 0 | ARHGAP15   |
| 4.83E-129 | 0 | CNBP       |
| 1.41E-128 | 0 | THADA      |
| 4.06E-127 | 0 | RBM39      |
| 4.88E-127 | 0 | STAM       |
| 8.78E-127 | 0 | P2RY10     |
| 2.85E-126 | 0 | CHD2       |
| 2.40E-124 | 0 | SNHG6      |
| 3.56E-123 | 0 | NOP53      |
| 3.74E-122 | 0 | FAS        |
| 4.27E-121 | 0 | GMFG       |
| 5.60E-121 | 0 | ATXN7      |
| 1.56E-120 | 0 | SKP1       |
| 3.82E-120 | 0 | MXI1       |
| 7.63E-120 | 0 | USP3       |
| 7.95E-120 | 0 | SLA        |
| 3.69E-119 | 0 | TSPYL2     |
| 5.06E-118 | 0 | CD226      |
| 2.47E-117 | 0 | MCUB       |
| 8.66E-117 | 0 | ASXL1      |
| 1.75E-115 | 0 | RGCC       |
| 1.61E-113 | 0 | CDKN1B     |
| 2.82E-113 | 0 | KAT6A      |
| 3.08E-113 | 0 | SFXN1      |
| 1.75E-112 | 0 | USP15      |
| 1.19E-109 | 0 | DDIT4      |
| 2.15E-109 | 0 | TNFAIP8    |
| 2.37E-109 | 0 | EIF3E      |
| 2.87E-109 | 0 | AC044849.1 |
| 4.07E-109 | 0 | TNRC6C     |

|           |   |            |
|-----------|---|------------|
| 7.33E-109 | 0 | DISC1      |
| 1.78E-108 | 0 | APBB1IP    |
| 3.63E-107 | 0 | CRTC3      |
| 1.41E-105 | 0 | ATP2B4     |
| 1.67E-105 | 0 | TMEM245    |
| 1.39E-104 | 0 | LINC-PINT  |
| 9.67E-103 | 0 | WWP1       |
| 1.18E-102 | 0 | UQCRB      |
| 2.37E-102 | 0 | KLF6       |
| 2.31E-101 | 0 | HINT1      |
| 7.01E-101 | 0 | GATA3      |
| 1.81E-100 | 0 | TNRC6B     |
| 3.07E-100 | 0 | KAT6B      |
| 3.59E-99  | 0 | PRDX2      |
| 4.54E-99  | 0 | CASP8      |
| 7.74E-99  | 0 | WAKMAR2    |
| 9.90E-99  | 0 | PRKY       |
| 5.17E-97  | 0 | MAML2      |
| 8.30E-97  | 0 | CERK       |
| 1.25E-96  | 0 | CORO1B     |
| 2.21E-96  | 0 | DGKA       |
| 2.25E-96  | 0 | SCML4      |
| 2.35E-96  | 0 | MYH9       |
| 1.06E-95  | 0 | ATXN1      |
| 2.37E-95  | 0 | ZNRF1      |
| 2.58E-95  | 0 | PRORP      |
| 7.26E-95  | 0 | GAS5       |
| 2.14E-94  | 0 | GALM       |
| 1.04E-93  | 0 | SMYD3      |
| 1.52E-92  | 0 | GIMAP4     |
| 7.92E-92  | 0 | ARID5A     |
| 1.42E-91  | 0 | PPP1R16B   |
| 2.90E-90  | 0 | PTGES3     |
| 3.08E-89  | 0 | TIAM1      |
| 4.43E-89  | 0 | MORF4L1    |
| 7.42E-89  | 0 | ARNTL      |
| 8.10E-89  | 0 | USP47      |
| 1.02E-88  | 0 | RHBDD2     |
| 2.61E-88  | 0 | HIPK1      |
| 3.27E-88  | 0 | COMMD6     |
| 5.55E-88  | 0 | AC058791.1 |
| 1.76E-87  | 0 | RASA1      |
| 1.80E-87  | 0 | MPHOSPH8   |

|          |   |            |
|----------|---|------------|
| 2.07E-87 | 0 | RBMX       |
| 8.57E-87 | 0 | PTGER4     |
| 2.04E-85 | 0 | BICRAL     |
| 1.08E-84 | 0 | SFMBT1     |
| 3.28E-84 | 0 | HLA-A      |
| 2.16E-83 | 0 | NSMCE3     |
| 3.31E-83 | 0 | AKT3       |
| 9.14E-83 | 0 | JMY        |
| 1.12E-82 | 0 | AC068587.4 |
| 2.71E-82 | 0 | LPIN2      |
| 5.20E-82 | 0 | FBXO32     |
| 8.39E-82 | 0 | IRS2       |
| 2.71E-81 | 0 | GCC2       |
| 4.99E-81 | 0 | AC079793.1 |
| 2.98E-80 | 0 | SRSF3      |
| 4.19E-80 | 0 | TXNIP      |
| 5.87E-80 | 0 | SON        |
| 8.98E-80 | 0 | GYPC       |
| 1.36E-79 | 0 | RGS10      |
| 1.61E-79 | 0 | IDS        |
| 7.25E-79 | 0 | CUL3       |
| 8.56E-79 | 0 | SPTAN1     |
| 8.96E-79 | 0 | TNFRSF18   |
| 4.05E-78 | 0 | PAK2       |
| 6.75E-78 | 0 | ANXA1      |
| 7.05E-78 | 0 | GPHN       |
| 9.61E-78 | 0 | SLC7A6     |
| 4.50E-77 | 0 | LBH        |
| 6.67E-77 | 0 | SATB1      |
| 8.00E-77 | 0 | CACYBP     |
| 1.48E-76 | 0 | EVI2A      |
| 4.60E-76 | 0 | CSGALNACT1 |
| 5.11E-76 | 0 | EMB        |
| 9.35E-76 | 0 | KIAA1109   |
| 3.65E-75 | 0 | H2AFV      |
| 1.20E-74 | 0 | SC5D       |
| 2.04E-74 | 0 | TOB1       |
| 3.88E-74 | 0 | TRERF1     |
| 9.03E-73 | 0 | ATXN7L1    |
| 1.09E-72 | 0 | TECR       |
| 4.64E-72 | 0 | ANAPC16    |
| 8.54E-72 | 0 | BIRC3      |
| 1.99E-71 | 0 | S100A4     |

|          |   |            |
|----------|---|------------|
| 3.63E-71 | 0 | UBE2B      |
| 1.22E-70 | 0 | SLC9A9     |
| 1.46E-70 | 0 | RSRP1      |
| 1.71E-70 | 0 | ANP32B     |
| 1.15E-69 | 0 | GPR171     |
| 1.53E-69 | 0 | RASGRP1    |
| 5.21E-69 | 0 | AL499604.1 |
| 2.38E-68 | 0 | ELK3       |
| 4.07E-68 | 0 | CMSS1      |
| 5.06E-68 | 0 | STK38      |
| 1.24E-67 | 0 | ICAM2      |
| 1.38E-67 | 0 | PACS1      |
| 3.28E-67 | 0 | STK24      |
| 5.54E-67 | 0 | G3BP2      |
| 8.57E-67 | 0 | SLFN5      |
| 8.99E-67 | 0 | SOCS1      |
| 8.23E-66 | 0 | RUNX2      |
| 9.85E-66 | 0 | ADD3       |
| 5.29E-65 | 0 | MRFAP1     |
| 7.69E-64 | 0 | RFX3       |
| 1.01E-63 | 0 | OCIAD2     |
| 5.33E-63 | 0 | ACAP1      |
| 3.84E-62 | 0 | GSTK1      |
| 2.67E-61 | 0 | ESR2       |
| 2.71E-61 | 0 | TLE5       |
| 5.18E-61 | 0 | PYHIN1     |
| 1.50E-60 | 0 | METTL8     |
| 2.72E-60 | 0 | TNRC6A     |
| 2.81E-60 | 0 | TBC1D15    |
| 4.81E-59 | 0 | RASA3      |
| 6.55E-59 | 0 | SLAMF1     |
| 8.72E-59 | 0 | STAG1      |
| 1.46E-58 | 0 | CCDC88C    |
| 2.57E-58 | 0 | NDUFS5     |
| 3.58E-58 | 0 | MECP2      |
| 5.37E-58 | 0 | AC016831.7 |
| 3.84E-57 | 0 | CCDC91     |
| 1.80E-56 | 0 | PHTF2      |
| 2.26E-56 | 0 | LINC01934  |
| 3.11E-56 | 0 | SPATA13    |
| 5.02E-56 | 0 | EPC2       |
| 6.30E-56 | 0 | LMBR1      |
| 6.78E-56 | 0 | ARAP2      |

|          |   |         |
|----------|---|---------|
| 1.86E-55 | 0 | CRBN    |
| 3.12E-55 | 0 | KIF2A   |
| 5.82E-55 | 0 | PSIP1   |
| 8.43E-55 | 0 | NCOA2   |
| 5.48E-54 | 0 | CHURC1  |
| 5.95E-54 | 0 | ZNRF2   |
| 7.08E-54 | 0 | NKTR    |
| 7.48E-54 | 0 | SVIP    |
| 1.48E-53 | 0 | PCNX2   |
| 2.40E-53 | 0 | JAK3    |
| 3.61E-53 | 0 | DCTN6   |
| 1.17E-52 | 0 | TTC33   |
| 2.90E-52 | 0 | FOXN2   |
| 1.15E-51 | 0 | URI1    |
| 1.52E-51 | 0 | MZT2A   |
| 2.54E-51 | 0 | OGT     |
| 3.05E-50 | 0 | CHIC2   |
| 3.15E-50 | 0 | TBL1X   |
| 5.90E-50 | 0 | CCM2    |
| 9.12E-49 | 0 | ZBTB38  |
| 9.48E-49 | 0 | UBE2K   |
| 2.25E-48 | 0 | PARP8   |
| 4.97E-48 | 0 | CCND3   |
| 6.11E-48 | 0 | KANSL1  |
| 6.89E-48 | 0 | STK39   |
| 9.86E-48 | 0 | USP9Y   |
| 1.16E-47 | 0 | MBP     |
| 1.67E-46 | 0 | TSPYL1  |
| 2.84E-46 | 0 | ARFGEF1 |
| 3.13E-46 | 0 | BCAS2   |
| 3.65E-46 | 0 | ATM     |
| 1.82E-45 | 0 | NCOA7   |
| 1.10E-44 | 0 | NUP98   |
| 1.47E-44 | 0 | NOSIP   |
| 5.93E-44 | 0 | CMTM7   |
| 6.49E-44 | 0 | FGD3    |
| 7.33E-44 | 0 | LRRC8D  |
| 1.16E-43 | 0 | CENPC   |
| 1.71E-43 | 0 | FILIP1L |
| 2.88E-43 | 0 | RNASET2 |
| 5.25E-43 | 0 | RAB11A  |
| 6.19E-43 | 0 | YME1L1  |
| 1.71E-41 | 0 | UTY     |



|          |   |            |
|----------|---|------------|
| 1.74E-41 | 0 | CDV3       |
| 5.20E-41 | 0 | BCLAF1     |
| 1.82E-40 | 0 | PPP1R10    |
| 2.08E-40 | 0 | PCED1B-AS1 |
| 7.49E-40 | 0 | SESN1      |
| 1.30E-39 | 0 | PRPF38B    |
| 1.53E-39 | 0 | MORC3      |
| 1.75E-39 | 0 | HNRNPUL1   |
| 2.20E-39 | 0 | HECTD1     |
| 2.22E-39 | 0 | METTL16    |
| 7.20E-39 | 0 | PLIN2      |
| 1.04E-38 | 0 | COG5       |
| 3.46E-38 | 0 | TBCC       |
| 4.99E-38 | 0 | HBP1       |
| 8.24E-38 | 0 | KLF3       |
| 1.40E-37 | 0 | BCL2       |
| 1.68E-37 | 0 | CEP85L     |
| 2.00E-37 | 0 | BRD9       |
| 1.14E-36 | 0 | OXCT1      |
| 2.92E-36 | 0 | RBL2       |
| 5.42E-36 | 0 | TSPAN14    |
| 7.35E-36 | 0 | RGS1       |
| 8.62E-36 | 0 | STT3B      |
| 3.24E-35 | 0 | DHX9       |
| 3.75E-35 | 0 | SETD2      |
| 4.01E-35 | 0 | ANKH       |
| 1.54E-34 | 0 | GADD45A    |
| 1.59E-34 | 0 | CAMK1D     |
| 1.79E-34 | 0 | NR1D2      |
| 8.64E-34 | 0 | NLRC5      |
| 6.41E-33 | 0 | KLF9       |
| 7.41E-33 | 0 | CHD3       |
| 1.32E-32 | 0 | IKZF3      |
| 2.62E-32 | 0 | ANKRD13C   |
| 3.76E-32 | 0 | ARL6IP5    |
| 1.93E-31 | 0 | INPP4A     |
| 2.24E-31 | 0 | CUTA       |
| 3.63E-31 | 0 | SLC25A26   |
| 5.51E-31 | 0 | RNF138     |
| 5.68E-31 | 0 | POR        |
| 2.95E-30 | 0 | LMNA       |
| 9.36E-30 | 0 | CITED2     |
| 1.05E-29 | 0 | USP36      |

|          |   |            |
|----------|---|------------|
| 1.34E-29 | 0 | SBDS       |
| 2.57E-29 | 0 | VSIR       |
| 2.30E-28 | 0 | IL2RG      |
| 5.22E-28 | 0 | TRPS1      |
| 6.17E-28 | 0 | PIM2       |
| 6.56E-28 | 0 | P2RY8      |
| 8.21E-28 | 0 | SLC16A1    |
| 2.53E-27 | 0 | DDX3Y      |
| 1.19E-26 | 0 | NLRP1      |
| 1.88E-26 | 0 | AHR        |
| 1.52E-25 | 0 | HDAC4      |
| 1.52E-25 | 0 | ISCA1      |
| 1.54E-25 | 0 | PPIL4      |
| 2.74E-25 | 0 | ZC3H7A     |
| 1.34E-24 | 0 | EPSTI1     |
| 2.99E-24 | 0 | RFFL       |
| 4.68E-24 | 0 | RANBP9     |
| 9.45E-24 | 0 | RPRD2      |
| 9.93E-24 | 0 | TOX        |
| 8.36E-22 | 0 | AEBP2      |
| 1.29E-21 | 0 | GRAMD1B    |
| 2.29E-21 | 0 | SMARCA2    |
| 3.33E-21 | 0 | AKIRIN1    |
| 5.76E-21 | 0 | MAN2A1     |
| 1.58E-20 | 0 | H2AFZ      |
| 3.65E-20 | 0 | PHLDA1     |
| 2.35E-19 | 0 | HBS1L      |
| 2.69E-19 | 0 | SPG7       |
| 6.13E-19 | 0 | IMMP2L     |
| 8.66E-19 | 0 | ARHGAP5    |
| 1.22E-18 | 0 | PDCL3      |
| 3.78E-18 | 0 | AC087286.2 |
| 8.35E-18 | 0 | TP53BP2    |
| 9.33E-18 | 0 | AC016831.5 |
| 1.55E-17 | 0 | ATP9B      |
| 4.97E-17 | 0 | PRKAR2A    |
| 3.07E-16 | 0 | KAT2B      |
| 4.51E-15 | 0 | ZNF609     |
| 5.40E-15 | 0 | IRF1       |
| 1.47E-14 | 0 | PIBF1      |
| 1.97E-14 | 0 | GLUD1      |
| 2.30E-14 | 0 | EXOC6B     |
| 8.61E-14 | 0 | CAPN7      |

|             |   |           |
|-------------|---|-----------|
| 9.37E-14    | 0 | REEP3     |
| 3.82E-12    | 0 | SGK3      |
| 5.61E-11    | 0 | ADAM10    |
| 9.85E-11    | 0 | NPC1      |
| 6.52E-10    | 0 | TGFBR2    |
| 3.05E-08    | 0 | RNF168    |
| 4.10E-08    | 0 | KLF2      |
| 1.90E-07    | 0 | NFE2L3    |
| 3.26E-07    | 0 | IFNAR2    |
| 3.91E-07    | 0 | CARD16    |
| 3.24E-06    | 0 | DNPH1     |
| 1.65E-05    | 0 | BTD       |
| 0.013033881 | 0 | BTG3      |
| 0           | 1 | GPLY      |
| 0           | 1 | NKG7      |
| 0           | 1 | CCL5      |
| 0           | 1 | CCL4      |
| 0           | 1 | GZMB      |
| 0           | 1 | GZMA      |
| 0           | 1 | CCL4L2    |
| 0           | 1 | GZMH      |
| 0           | 1 | IFNG      |
| 0           | 1 | KLRD1     |
| 0           | 1 | GZMK      |
| 0           | 1 | PRF1      |
| 0           | 1 | CRTAM     |
| 0           | 1 | XCL2      |
| 0           | 1 | LINC02446 |
| 0           | 1 | CST7      |
| 0           | 1 | CD8A      |
| 0           | 1 | CXCL13    |
| 0           | 1 | KLRK1     |
| 0           | 1 | AOAH      |
| 0           | 1 | KLRC1     |
| 0           | 1 | KLRC2     |
| 0           | 1 | CD8B      |
| 0           | 1 | CTSW      |
| 0           | 1 | ATP8B4    |
| 0           | 1 | LINC01871 |
| 0           | 1 | APOBEC3G  |
| 0           | 1 | HCST      |
| 0           | 1 | SLA2      |
| 0           | 1 | CMC1      |

|   |   |            |
|---|---|------------|
| 0 | 1 | DTHD1      |
| 0 | 1 | TRGC2      |
| 0 | 1 | LAG3       |
| 0 | 1 | CBLB       |
| 0 | 1 | ID2        |
| 0 | 1 | KLRC3      |
| 0 | 1 | SAMD3      |
| 0 | 1 | CD3G       |
| 0 | 1 | CD7        |
| 0 | 1 | THEMIS     |
| 0 | 1 | NCALD      |
| 0 | 1 | PLAAT4     |
| 0 | 1 | HOPX       |
| 0 | 1 | RAB27A     |
| 0 | 1 | LYST       |
| 0 | 1 | CD3D       |
| 0 | 1 | ITGA1      |
| 0 | 1 | NELL2      |
| 0 | 1 | HAVCR2     |
| 0 | 1 | PDE3B      |
| 0 | 1 | CCL3       |
| 0 | 1 | CD96       |
| 0 | 1 | ITGAE      |
| 0 | 1 | PARP8      |
| 0 | 1 | GZMM       |
| 0 | 1 | CLEC2B     |
| 0 | 1 | SYTL3      |
| 0 | 1 | LINC01934  |
| 0 | 1 | SLFN12L    |
| 0 | 1 | DUSP2      |
| 0 | 1 | RUNX3      |
| 0 | 1 | SYTL2      |
| 0 | 1 | TNIP3      |
| 0 | 1 | TRG-AS1    |
| 0 | 1 | PTPN22     |
| 0 | 1 | SCML4      |
| 0 | 1 | PRKCH      |
| 0 | 1 | PITPNC1    |
| 0 | 1 | PIK3R1     |
| 0 | 1 | PTMS       |
| 0 | 1 | AKNA       |
| 0 | 1 | PYHIN1     |
| 0 | 1 | AC243829.4 |

|   |   |          |
|---|---|----------|
| 0 | 1 | CMIP     |
| 0 | 1 | PPP2R2B  |
| 0 | 1 | METRNL   |
| 0 | 1 | ABCB1    |
| 0 | 1 | IFITM2   |
| 0 | 1 | SUPT3H   |
| 0 | 1 | PIP4K2A  |
| 0 | 1 | CCSER2   |
| 0 | 1 | MVB12B   |
| 0 | 1 | CHST12   |
| 0 | 1 | CD3E     |
| 0 | 1 | YES1     |
| 0 | 1 | TOX      |
| 0 | 1 | SLA      |
| 0 | 1 | EVL      |
| 0 | 1 | FYN      |
| 0 | 1 | LY6E     |
| 0 | 1 | ATP8A1   |
| 0 | 1 | DAPK2    |
| 0 | 1 | CLIC3    |
| 0 | 1 | LYAR     |
| 0 | 1 | PRKCQ    |
| 0 | 1 | GPR171   |
| 0 | 1 | IKZF3    |
| 0 | 1 | SYNE1    |
| 0 | 1 | PRKX     |
| 0 | 1 | SFMBT2   |
| 0 | 1 | ITM2A    |
| 0 | 1 | CD99     |
| 0 | 1 | MSN      |
| 0 | 1 | SH3BGRL3 |
| 0 | 1 | PLAAT3   |
| 0 | 1 | OASL     |
| 0 | 1 | GALNT11  |
| 0 | 1 | GFOD1    |
| 0 | 1 | SRGAP3   |
| 0 | 1 | BICDL1   |
| 0 | 1 | ITGA4    |
| 0 | 1 | CD2      |
| 0 | 1 | TRAC     |
| 0 | 1 | SLFN5    |
| 0 | 1 | TRAT1    |
| 0 | 1 | APBA2    |

|   |   |            |
|---|---|------------|
| 0 | 1 | KIF21A     |
| 0 | 1 | ANXA1      |
| 0 | 1 | ATXN1      |
| 0 | 1 | DUSP4      |
| 0 | 1 | GIMAP4     |
| 0 | 1 | RNF19A     |
| 0 | 1 | NFATC2     |
| 0 | 1 | TGFBR3     |
| 0 | 1 | TRBC1      |
| 0 | 1 | ALOX5AP    |
| 0 | 1 | ZEB2       |
| 0 | 1 | SLC7A5     |
| 0 | 1 | ZFYVE28    |
| 0 | 1 | STAT4      |
| 0 | 1 | ADGRE5     |
| 0 | 1 | PAXX       |
| 0 | 1 | SLF1       |
| 0 | 1 | CRIP1      |
| 0 | 1 | ABHD17A    |
| 0 | 1 | NAP1L4     |
| 0 | 1 | PPP1R16B   |
| 0 | 1 | CD247      |
| 0 | 1 | GNG2       |
| 0 | 1 | C12orf75   |
| 0 | 1 | PSMB9      |
| 0 | 1 | TRBC2      |
| 0 | 1 | SH2D1A     |
| 0 | 1 | PTPRC      |
| 0 | 1 | HLA-C      |
| 0 | 1 | APMAP      |
| 0 | 1 | ETS1       |
| 0 | 1 | ECI2       |
| 0 | 1 | PCED1B-AS1 |
| 0 | 1 | GTDC1      |
| 0 | 1 | TRERF1     |
| 0 | 1 | SH2D2A     |
| 0 | 1 | IFITM1     |
| 0 | 1 | PDCD1      |
| 0 | 1 | MYL12A     |
| 0 | 1 | HLA-F      |
| 0 | 1 | BTN3A2     |
| 0 | 1 | EMB        |
| 0 | 1 | IL2RB      |

|           |   |          |
|-----------|---|----------|
| 0         | 1 | INPP4B   |
| 0         | 1 | OXNAD1   |
| 0         | 1 | HLA-A    |
| 0         | 1 | MRPL10   |
| 0         | 1 | LCK      |
| 0         | 1 | RABGAP1L |
| 0         | 1 | GPR174   |
| 0         | 1 | NIBAN1   |
| 0         | 1 | IL32     |
| 0         | 1 | GIMAP7   |
| 0         | 1 | TSEN54   |
| 0         | 1 | TNFAIP3  |
| 0         | 1 | RNF213   |
| 0         | 1 | MCTP2    |
| 0         | 1 | B2M      |
| 0         | 1 | SEPTIN7  |
| 0         | 1 | SKAP1    |
| 0         | 1 | TMSB4X   |
| 0         | 1 | LEPROTL1 |
| 0         | 1 | HLA-B    |
| 0         | 1 | LCP1     |
| 0         | 1 | SYNE2    |
| 0         | 1 | TIGIT    |
| 0         | 1 | CD63     |
| 4.44E-303 | 1 | SAMSN1   |
| 1.01E-302 | 1 | RNF125   |
| 5.91E-301 | 1 | TNFSF9   |
| 1.81E-300 | 1 | ZBED4    |
| 2.94E-299 | 1 | SLC38A1  |
| 2.40E-295 | 1 | ABLIM1   |
| 2.15E-293 | 1 | CKLF     |
| 3.76E-292 | 1 | STAT5B   |
| 3.37E-289 | 1 | GALM     |
| 1.72E-287 | 1 | SIRPG    |
| 8.11E-286 | 1 | JAML     |
| 1.44E-285 | 1 | TBCD     |
| 7.24E-285 | 1 | RALGAPA1 |
| 1.02E-284 | 1 | DRAP1    |
| 1.89E-279 | 1 | CYTOR    |
| 3.17E-279 | 1 | CAMK4    |
| 1.09E-278 | 1 | SRSF7    |
| 3.43E-277 | 1 | HMGB1    |
| 1.58E-275 | 1 | PPP2R5C  |

|           |   |            |
|-----------|---|------------|
| 8.57E-274 | 1 | GABARAPL1  |
| 8.76E-272 | 1 | IL2RG      |
| 1.35E-269 | 1 | ATP2B4     |
| 6.65E-268 | 1 | PTPRJ      |
| 8.59E-267 | 1 | MAPRE2     |
| 1.53E-266 | 1 | MYL12B     |
| 2.33E-266 | 1 | PTPN4      |
| 6.04E-263 | 1 | CFL1       |
| 2.99E-261 | 1 | RIN3       |
| 1.11E-260 | 1 | CNOT6L     |
| 1.77E-259 | 1 | H3F3B      |
| 1.74E-256 | 1 | UBB        |
| 7.71E-256 | 1 | CD226      |
| 4.35E-255 | 1 | TG         |
| 2.09E-254 | 1 | CDK17      |
| 4.00E-254 | 1 | PRKACB     |
| 1.57E-253 | 1 | STOM       |
| 4.17E-253 | 1 | MLLT3      |
| 1.59E-252 | 1 | LRBA       |
| 5.54E-252 | 1 | OPTN       |
| 1.63E-251 | 1 | CD52       |
| 1.26E-250 | 1 | BCL11B     |
| 4.36E-250 | 1 | CEMIP2     |
| 5.51E-250 | 1 | PAM        |
| 8.11E-250 | 1 | ZAP70      |
| 4.73E-249 | 1 | CD81       |
| 1.56E-248 | 1 | CXCR6      |
| 2.78E-246 | 1 | SLAMF6     |
| 1.69E-245 | 1 | GALNT2     |
| 2.36E-245 | 1 | MGAT4A     |
| 2.00E-244 | 1 | MNAT1      |
| 5.85E-242 | 1 | HLA-E      |
| 7.55E-242 | 1 | AL137856.1 |
| 2.28E-240 | 1 | ISG15      |
| 6.91E-240 | 1 | FABP5      |
| 2.02E-239 | 1 | BIN2       |
| 8.54E-238 | 1 | PSME1      |
| 8.70E-238 | 1 | AF165147.1 |
| 4.22E-237 | 1 | CLEC2D     |
| 3.25E-235 | 1 | HMGB2      |
| 3.39E-235 | 1 | MYO1F      |
| 1.37E-234 | 1 | CD69       |
| 2.33E-233 | 1 | RNF115     |



|           |   |          |
|-----------|---|----------|
| 2.96E-233 | 1 | CALM1    |
| 3.85E-233 | 1 | CLDND1   |
| 5.58E-230 | 1 | WNK1     |
| 1.38E-228 | 1 | GRAP2    |
| 7.15E-227 | 1 | PSTPIP1  |
| 9.10E-227 | 1 | FUT8     |
| 6.41E-224 | 1 | GAPDH    |
| 8.21E-224 | 1 | APOBEC3C |
| 2.16E-223 | 1 | RASAL3   |
| 1.30E-222 | 1 | KIF13B   |
| 7.45E-221 | 1 | ARAP2    |
| 5.63E-220 | 1 | PTPN7    |
| 2.90E-219 | 1 | RABAC1   |
| 7.82E-219 | 1 | TC2N     |
| 1.06E-218 | 1 | CARD11   |
| 3.05E-218 | 1 | SPN      |
| 1.66E-217 | 1 | DOK2     |
| 1.78E-217 | 1 | SPON2    |
| 3.84E-217 | 1 | JMJD6    |
| 3.10E-213 | 1 | SAMD9    |
| 6.25E-210 | 1 | ITGAL    |
| 1.35E-209 | 1 | CORO1A   |
| 3.63E-209 | 1 | DGKZ     |
| 3.74E-209 | 1 | ACAP1    |
| 4.50E-207 | 1 | MACF1    |
| 8.29E-207 | 1 | TUBA4A   |
| 8.33E-206 | 1 | GIMAP1   |
| 5.53E-205 | 1 | HERPUD2  |
| 5.91E-205 | 1 | CLIC1    |
| 4.75E-203 | 1 | KLF13    |
| 3.30E-202 | 1 | BTN3A1   |
| 5.78E-202 | 1 | GUK1     |
| 6.56E-202 | 1 | LDHA     |
| 9.80E-202 | 1 | GAS7     |
| 3.00E-199 | 1 | DENND2D  |
| 1.61E-196 | 1 | RAB5IF   |
| 2.76E-196 | 1 | ISG20    |
| 5.11E-196 | 1 | IER5L    |
| 6.94E-196 | 1 | MPZL3    |
| 3.68E-194 | 1 | AHI1     |
| 1.34E-193 | 1 | MBNL1    |
| 1.63E-193 | 1 | SELPLG   |
| 5.74E-193 | 1 | MCOLN2   |

|           |   |          |
|-----------|---|----------|
| 4.99E-191 | 1 | DOCK8    |
| 8.05E-191 | 1 | TBC1D2B  |
| 4.76E-190 | 1 | RAC2     |
| 1.62E-189 | 1 | PLPP1    |
| 5.37E-189 | 1 | CCDC85B  |
| 6.75E-187 | 1 | ACTN4    |
| 2.30E-185 | 1 | MPHOSPH9 |
| 1.75E-184 | 1 | C5orf56  |
| 1.66E-183 | 1 | IFI16    |
| 2.95E-183 | 1 | OTULIN   |
| 4.57E-183 | 1 | TSPAN5   |
| 2.67E-182 | 1 | BUB3     |
| 6.78E-182 | 1 | IFI44L   |
| 1.27E-181 | 1 | RBPJ     |
| 3.50E-180 | 1 | ARHGAP9  |
| 6.56E-180 | 1 | TNFRSF9  |
| 9.04E-180 | 1 | BIN1     |
| 1.10E-179 | 1 | TMEM50A  |
| 2.81E-179 | 1 | PFN1     |
| 1.52E-178 | 1 | PCNX2    |
| 1.86E-178 | 1 | IFI6     |
| 2.99E-178 | 1 | IQGAP1   |
| 8.12E-178 | 1 | PSMA1    |
| 9.58E-178 | 1 | SNTB2    |
| 4.06E-177 | 1 | SIRT2    |
| 4.59E-177 | 1 | GBP2     |
| 1.14E-175 | 1 | MFSD6    |
| 5.86E-175 | 1 | ARL4C    |
| 1.85E-173 | 1 | CCND2    |
| 7.67E-173 | 1 | PPP2R5A  |
| 1.43E-172 | 1 | DIP2A    |
| 7.24E-172 | 1 | B3GNT2   |
| 2.61E-171 | 1 | TERF2IP  |
| 3.64E-171 | 1 | BRD1     |
| 3.93E-168 | 1 | PDCD4    |
| 2.96E-167 | 1 | NCOA1    |
| 1.39E-165 | 1 | AUTS2    |
| 2.18E-163 | 1 | GPR65    |
| 6.55E-163 | 1 | NAA50    |
| 1.47E-160 | 1 | ARPC5L   |
| 3.30E-160 | 1 | CNOT2    |
| 5.17E-160 | 1 | ARHGEF1  |
| 1.50E-156 | 1 | PCED1B   |

|           |   |            |
|-----------|---|------------|
| 1.51E-156 | 1 | WHRN       |
| 2.77E-155 | 1 | LSP1       |
| 3.10E-155 | 1 | RASA2      |
| 2.49E-154 | 1 | ABI3       |
| 1.10E-153 | 1 | RESF1      |
| 1.89E-153 | 1 | SAMD9L     |
| 5.97E-153 | 1 | BST2       |
| 1.66E-152 | 1 | AKT3       |
| 6.65E-152 | 1 | SPATA13    |
| 9.66E-152 | 1 | PDE7B      |
| 1.77E-151 | 1 | IDH2       |
| 3.04E-150 | 1 | PSMB8      |
| 4.40E-149 | 1 | IFI44      |
| 4.82E-149 | 1 | ARHGEF3    |
| 4.87E-149 | 1 | TNFSF10    |
| 1.24E-148 | 1 | CD6        |
| 1.26E-148 | 1 | AC011476.3 |
| 2.02E-147 | 1 | GATA3      |
| 2.04E-147 | 1 | ARPC2      |
| 5.07E-145 | 1 | GRAMD1B    |
| 2.85E-144 | 1 | CASP8      |
| 1.83E-143 | 1 | DGKH       |
| 1.87E-143 | 1 | HCP5       |
| 3.50E-143 | 1 | STK17A     |
| 6.25E-142 | 1 | UTRN       |
| 2.97E-140 | 1 | CHST11     |
| 8.15E-140 | 1 | TSPYL2     |
| 1.15E-139 | 1 | PGK1       |
| 1.18E-139 | 1 | TBC1D10C   |
| 1.97E-139 | 1 | WIPF1      |
| 2.50E-139 | 1 | CARS       |
| 2.65E-139 | 1 | IKZF1      |
| 1.54E-138 | 1 | DDX3X      |
| 6.37E-138 | 1 | AAK1       |
| 3.84E-137 | 1 | PEX14      |
| 1.78E-136 | 1 | LRMP       |
| 6.10E-136 | 1 | KANSL1     |
| 9.06E-136 | 1 | FAM160B1   |
| 1.01E-135 | 1 | PCID2      |
| 1.18E-135 | 1 | EIF2AK2    |
| 3.17E-134 | 1 | CLASP1     |
| 3.50E-134 | 1 | KLRB1      |
| 1.40E-133 | 1 | AL627171.2 |

|           |   |          |
|-----------|---|----------|
| 1.75E-133 | 1 | LBH      |
| 1.36E-132 | 1 | UBE2S    |
| 1.66E-132 | 1 | HNRNPLL  |
| 3.37E-131 | 1 | XAF1     |
| 1.14E-130 | 1 | FAM3C    |
| 1.05E-129 | 1 | RASGRP1  |
| 3.51E-129 | 1 | SPAG1    |
| 8.74E-129 | 1 | ARL6IP5  |
| 2.46E-127 | 1 | PPP1R12A |
| 1.83E-126 | 1 | SMC4     |
| 6.82E-126 | 1 | RAP1B    |
| 8.99E-126 | 1 | PPDPF    |
| 3.46E-125 | 1 | GIMAP5   |
| 4.21E-125 | 1 | SP140    |
| 5.95E-125 | 1 | LPIN2    |
| 1.02E-124 | 1 | SUN2     |
| 2.11E-124 | 1 | APOL6    |
| 5.81E-123 | 1 | GPRIN3   |
| 6.96E-122 | 1 | LIME1    |
| 1.00E-120 | 1 | GLMN     |
| 2.81E-120 | 1 | PRKY     |
| 3.19E-120 | 1 | H1FX     |
| 6.11E-120 | 1 | YARS     |
| 1.24E-118 | 1 | SUB1     |
| 1.86E-118 | 1 | SMAD7    |
| 2.99E-118 | 1 | MAP2K2   |
| 7.47E-118 | 1 | PTPRA    |
| 1.27E-117 | 1 | ASXL2    |
| 1.71E-117 | 1 | DDX24    |
| 2.32E-116 | 1 | RNF38    |
| 3.00E-113 | 1 | RASA1    |
| 3.34E-112 | 1 | STK39    |
| 2.21E-111 | 1 | HIST1H3D |
| 2.42E-111 | 1 | EID1     |
| 4.01E-111 | 1 | NEU1     |
| 7.23E-110 | 1 | LRRC8C   |
| 8.53E-110 | 1 | TRANK1   |
| 9.13E-110 | 1 | ITM2C    |
| 7.17E-109 | 1 | LAX1     |
| 1.94E-108 | 1 | IFI27L2  |
| 6.78E-108 | 1 | SLC9A3R1 |
| 1.78E-107 | 1 | GGA2     |
| 8.78E-107 | 1 | PRMT2    |

|           |   |            |
|-----------|---|------------|
| 1.04E-106 | 1 | SRI        |
| 2.72E-106 | 1 | HIST1H1E   |
| 4.11E-105 | 1 | CHORDC1    |
| 3.36E-104 | 1 | AC008569.1 |
| 3.78E-104 | 1 | EIF4A2     |
| 4.33E-104 | 1 | FBXO32     |
| 1.78E-103 | 1 | VAMP2      |
| 1.81E-103 | 1 | MAP4       |
| 6.16E-103 | 1 | NDUFS5     |
| 1.43E-101 | 1 | KLF12      |
| 5.45E-101 | 1 | CDC14A     |
| 6.20E-101 | 1 | CREBZF     |
| 7.26E-101 | 1 | AHSA1      |
| 1.43E-100 | 1 | ENSA       |
| 1.47E-100 | 1 | ITPRIP     |
| 2.95E-100 | 1 | SEMA4D     |
| 5.46E-100 | 1 | PRKCA      |
| 6.63E-100 | 1 | MYLIP      |
| 3.66E-99  | 1 | RGCC       |
| 4.48E-99  | 1 | TMEM181    |
| 1.14E-98  | 1 | PRDM1      |
| 1.16E-98  | 1 | CD38       |
| 9.08E-98  | 1 | DUSP10     |
| 9.56E-98  | 1 | UBE2E3     |
| 1.27E-97  | 1 | MIER1      |
| 5.00E-97  | 1 | DEK        |
| 1.15E-95  | 1 | ANKRD13D   |
| 2.33E-95  | 1 | LMNB1      |
| 4.75E-95  | 1 | TRAPPC10   |
| 8.16E-95  | 1 | FAM102B    |
| 2.72E-94  | 1 | SPATS2L    |
| 2.96E-94  | 1 | RSRP1      |
| 1.04E-93  | 1 | TLN1       |
| 6.26E-93  | 1 | BHLHE40    |
| 2.80E-92  | 1 | RPAP2      |
| 4.12E-92  | 1 | SEM1       |
| 8.09E-92  | 1 | SURF4      |
| 1.66E-91  | 1 | RBCK1      |
| 2.13E-91  | 1 | ZCCHC2     |
| 4.13E-91  | 1 | IL21R      |
| 6.15E-91  | 1 | SERTAD1    |
| 9.02E-91  | 1 | SNRNPB     |
| 9.51E-91  | 1 | SHISA5     |

|          |   |            |
|----------|---|------------|
| 4.14E-90 | 1 | DHRS7      |
| 4.91E-90 | 1 | NCOR1      |
| 2.29E-89 | 1 | PARK7      |
| 9.44E-89 | 1 | CDC42EP3   |
| 2.83E-88 | 1 | NFIL3      |
| 1.27E-87 | 1 | LAT        |
| 3.56E-86 | 1 | SSBP4      |
| 7.76E-86 | 1 | TMX4       |
| 8.63E-86 | 1 | VAV3       |
| 2.97E-85 | 1 | XRN1       |
| 3.03E-85 | 1 | RUNX2      |
| 3.75E-85 | 1 | SEPTIN1    |
| 4.64E-85 | 1 | HIBCH      |
| 1.42E-84 | 1 | PRDX6      |
| 2.46E-84 | 1 | TAF7       |
| 4.55E-84 | 1 | PTP4A2     |
| 7.41E-84 | 1 | NFATC3     |
| 1.35E-83 | 1 | PREP       |
| 9.00E-83 | 1 | CMC2       |
| 9.41E-83 | 1 | CDK6       |
| 1.31E-82 | 1 | CEP85L     |
| 4.30E-82 | 1 | DDX58      |
| 4.43E-81 | 1 | MAPK1      |
| 2.60E-80 | 1 | AC044849.1 |
| 3.28E-80 | 1 | NCOA7      |
| 3.36E-80 | 1 | CD2BP2     |
| 3.61E-80 | 1 | ITGB2      |
| 7.94E-80 | 1 | NUDC       |
| 1.05E-79 | 1 | RGS2       |
| 1.93E-79 | 1 | ZNRF1      |
| 4.86E-79 | 1 | TRPC4AP    |
| 5.04E-79 | 1 | SGMS1      |
| 1.66E-78 | 1 | SPTAN1     |
| 2.38E-78 | 1 | REEP5      |
| 2.87E-78 | 1 | HERC5      |
| 9.23E-78 | 1 | HMGN4      |
| 1.71E-77 | 1 | CD27       |
| 2.02E-77 | 1 | SYNRG      |
| 2.34E-77 | 1 | WDR83OS    |
| 2.68E-77 | 1 | ZNF83      |
| 1.12E-76 | 1 | RGS1       |
| 1.47E-76 | 1 | C21orf91   |
| 4.22E-76 | 1 | SF3B5      |

|          |   |          |
|----------|---|----------|
| 6.54E-76 | 1 | IFI35    |
| 7.41E-76 | 1 | CASP3    |
| 8.70E-76 | 1 | TAF15    |
| 1.98E-75 | 1 | NAB1     |
| 2.80E-75 | 1 | TAX1BP1  |
| 1.35E-74 | 1 | USP25    |
| 1.59E-74 | 1 | FAM177A1 |
| 1.74E-74 | 1 | CITED2   |
| 2.19E-74 | 1 | UBR2     |
| 5.87E-74 | 1 | ARF6     |
| 7.74E-74 | 1 | POLR2A   |
| 1.03E-73 | 1 | BLOC1S1  |
| 4.97E-73 | 1 | FGD3     |
| 8.30E-73 | 1 | PSME4    |
| 1.65E-72 | 1 | CHIC2    |
| 4.08E-72 | 1 | TSC22D1  |
| 8.37E-72 | 1 | HP1BP3   |
| 1.42E-71 | 1 | TBL1XR1  |
| 1.93E-71 | 1 | UBE2L6   |
| 3.19E-71 | 1 | RFC1     |
| 5.30E-71 | 1 | PMF1     |
| 1.10E-70 | 1 | KIF2A    |
| 1.19E-70 | 1 | YWHAQ    |
| 2.16E-70 | 1 | TAP1     |
| 3.29E-70 | 1 | RBL2     |
| 9.81E-70 | 1 | PGAM1    |
| 1.08E-69 | 1 | BZW1     |
| 4.38E-69 | 1 | DIAPH1   |
| 6.98E-69 | 1 | RSBN1L   |
| 8.15E-69 | 1 | GLS      |
| 1.10E-68 | 1 | NUCB2    |
| 1.22E-68 | 1 | H2AFX    |
| 1.52E-68 | 1 | CDC42SE1 |
| 1.90E-68 | 1 | CDK2AP2  |
| 5.71E-68 | 1 | GPATCH8  |
| 5.75E-68 | 1 | LSM2     |
| 2.16E-67 | 1 | SLC38A2  |
| 2.29E-67 | 1 | PLP2     |
| 3.63E-67 | 1 | SLC4A7   |
| 4.02E-67 | 1 | PSMB10   |
| 5.00E-67 | 1 | TENT4B   |
| 1.11E-66 | 1 | PLEKHA2  |
| 2.32E-66 | 1 | S1PR4    |

|          |   |            |
|----------|---|------------|
| 2.48E-65 | 1 | ABHD17B    |
| 2.81E-65 | 1 | CORO7      |
| 1.94E-64 | 1 | FLNA       |
| 5.37E-64 | 1 | HELB       |
| 5.79E-64 | 1 | RC3H1      |
| 6.85E-64 | 1 | LINC00623  |
| 9.89E-64 | 1 | PARP9      |
| 1.19E-63 | 1 | ABL1       |
| 1.30E-63 | 1 | SRSF2      |
| 2.85E-63 | 1 | TFDP2      |
| 5.59E-63 | 1 | CACYBP     |
| 1.41E-62 | 1 | POLR2K     |
| 1.49E-62 | 1 | SMURF2     |
| 1.68E-62 | 1 | R3HDM1     |
| 1.76E-62 | 1 | MX1        |
| 2.07E-62 | 1 | STAT5A     |
| 4.63E-62 | 1 | MXD4       |
| 1.94E-61 | 1 | IGF2R      |
| 6.22E-61 | 1 | KDM5A      |
| 6.76E-61 | 1 | PSMA5      |
| 5.43E-60 | 1 | TRAF5      |
| 7.95E-60 | 1 | NUB1       |
| 7.02E-59 | 1 | HIST2H2AC  |
| 7.75E-59 | 1 | AC068587.4 |
| 7.77E-59 | 1 | TRIM22     |
| 8.28E-59 | 1 | CD84       |
| 1.24E-58 | 1 | EPS15      |
| 1.91E-58 | 1 | HMOX2      |
| 5.64E-58 | 1 | FRYL       |
| 9.43E-58 | 1 | BUD31      |
| 1.05E-57 | 1 | TIAM2      |
| 6.08E-57 | 1 | KIAA0319L  |
| 7.32E-57 | 1 | TBCC       |
| 7.60E-57 | 1 | ADSS       |
| 1.22E-56 | 1 | SELENOI    |
| 2.13E-56 | 1 | RFX7       |
| 3.03E-56 | 1 | NMRK1      |
| 6.00E-56 | 1 | ZMYND11    |
| 7.71E-56 | 1 | DYNLL1     |
| 1.59E-55 | 1 | STIP1      |
| 2.74E-55 | 1 | CHMP4A     |
| 7.00E-55 | 1 | CAB39      |
| 5.42E-54 | 1 | CCT4       |



|          |   |            |
|----------|---|------------|
| 1.00E-53 | 1 | TOB1       |
| 9.89E-53 | 1 | ZDHHC20    |
| 2.99E-52 | 1 | LNPEP      |
| 4.27E-52 | 1 | DR1        |
| 5.09E-52 | 1 | PRPF4B     |
| 1.86E-51 | 1 | ZNF217     |
| 8.99E-51 | 1 | UBE2A      |
| 3.58E-50 | 1 | CSNK1G3    |
| 5.94E-50 | 1 | ITGB1      |
| 1.73E-49 | 1 | IRF9       |
| 2.78E-49 | 1 | SUCLG2     |
| 3.94E-49 | 1 | NUTM2B-AS1 |
| 5.82E-49 | 1 | SEPTIN11   |
| 2.63E-48 | 1 | OAT        |
| 6.04E-48 | 1 | ANP32E     |
| 7.05E-48 | 1 | USP33      |
| 7.40E-48 | 1 | ADAR       |
| 1.21E-47 | 1 | TTN        |
| 2.02E-47 | 1 | MACO1      |
| 8.36E-47 | 1 | USP11      |
| 1.00E-46 | 1 | STIM1      |
| 4.46E-46 | 1 | GNPTAB     |
| 3.74E-45 | 1 | MBD5       |
| 5.84E-45 | 1 | PPP6R2     |
| 1.01E-43 | 1 | ETNK1      |
| 2.89E-43 | 1 | RNF166     |
| 7.35E-43 | 1 | RASSF1     |
| 1.71E-41 | 1 | PPP3CC     |
| 1.76E-40 | 1 | MORF4L2    |
| 1.02E-38 | 1 | INTS6L     |
| 2.05E-37 | 1 | RASA3      |
| 3.10E-37 | 1 | LRIF1      |
| 8.07E-36 | 1 | HIST1H1D   |
| 8.89E-36 | 1 | BAG3       |
| 4.86E-35 | 1 | CBX4       |
| 5.00E-35 | 1 | TPP2       |
| 2.04E-34 | 1 | ABHD3      |
| 5.10E-34 | 1 | TRIM26     |
| 4.70E-33 | 1 | OSBPL3     |
| 6.91E-31 | 1 | ENTPD1-AS1 |
| 1.92E-27 | 1 | INPP5F     |
| 4.92E-26 | 1 | TGFB1      |
| 1.31E-25 | 1 | RHOB       |

|          |   |            |
|----------|---|------------|
| 3.27E-23 | 1 | ZFAND2A    |
| 2.01E-20 | 1 | GOLGA4     |
| 3.85E-07 | 1 | ENTPD1     |
| 0        | 2 | AFF3       |
| 0        | 2 | BANK1      |
| 0        | 2 | EBF1       |
| 0        | 2 | CD79A      |
| 0        | 2 | ARHGAP24   |
| 0        | 2 | BACH2      |
| 0        | 2 | MS4A1      |
| 0        | 2 | PLEKHG1    |
| 0        | 2 | GNG7       |
| 0        | 2 | LY9        |
| 0        | 2 | IGHD       |
| 0        | 2 | ADAM28     |
| 0        | 2 | TCF4       |
| 0        | 2 | FCRL1      |
| 0        | 2 | 1-Mar      |
| 0        | 2 | LYN        |
| 0        | 2 | CCSER1     |
| 0        | 2 | RALGPS2    |
| 0        | 2 | TNFRSF13C  |
| 0        | 2 | MEF2C      |
| 0        | 2 | KHDRBS2    |
| 0        | 2 | MGAT5      |
| 0        | 2 | LARGE1     |
| 0        | 2 | BCL11A     |
| 0        | 2 | PRKCE      |
| 0        | 2 | RUBCNL     |
| 0        | 2 | ST6GALNAC3 |
| 0        | 2 | CD83       |
| 0        | 2 | AC120193.1 |
| 0        | 2 | COL19A1    |
| 0        | 2 | YBX3       |
| 0        | 2 | C12orf42   |
| 0        | 2 | TMEM156    |
| 0        | 2 | ST6GAL1    |
| 0        | 2 | CHPT1      |
| 0        | 2 | HLA-DRA    |
| 0        | 2 | JADE3      |
| 0        | 2 | TLE1       |
| 0        | 2 | CD37       |
| 0        | 2 | LINC00926  |

|   |   |            |
|---|---|------------|
| 0 | 2 | PAX5       |
| 0 | 2 | VPREB3     |
| 0 | 2 | TCL1A      |
| 0 | 2 | INPP5A     |
| 0 | 2 | ACSM3      |
| 0 | 2 | KLHL5      |
| 0 | 2 | SWAP70     |
| 0 | 2 | SMAD3      |
| 0 | 2 | CD74       |
| 0 | 2 | HLA-DQA1   |
| 0 | 2 | UBE2E2     |
| 0 | 2 | BLK        |
| 0 | 2 | CARMIL1    |
| 0 | 2 | SNX2       |
| 0 | 2 | SSH2       |
| 0 | 2 | ZBTB16     |
| 0 | 2 | SIPA1L3    |
| 0 | 2 | HLA-DQB1   |
| 0 | 2 | HLA-DPB1   |
| 0 | 2 | HLA-DRB5   |
| 0 | 2 | WDFY4      |
| 0 | 2 | RERE       |
| 0 | 2 | VPS37B     |
| 0 | 2 | CDK14      |
| 0 | 2 | OSBPL10    |
| 0 | 2 | IRF8       |
| 0 | 2 | HLA-DQA2   |
| 0 | 2 | ANKRD44    |
| 0 | 2 | FCHSD2     |
| 0 | 2 | AP001011.1 |
| 0 | 2 | AUTS2      |
| 0 | 2 | THRB       |
| 0 | 2 | PLCG2      |
| 0 | 2 | GRASP      |
| 0 | 2 | SETBP1     |
| 0 | 2 | SFMBT1     |
| 0 | 2 | LINC02397  |
| 0 | 2 | NIBAN3     |
| 0 | 2 | SLC49A4    |
| 0 | 2 | CD22       |
| 0 | 2 | INPP5D     |
| 0 | 2 | HDAC9      |
| 0 | 2 | SNX29      |

|   |   |            |
|---|---|------------|
| 0 | 2 | TTC3       |
| 0 | 2 | LAPTM5     |
| 0 | 2 | KCNQ5      |
| 0 | 2 | DNMBP      |
| 0 | 2 | SIPA1L1    |
| 0 | 2 | COBLL1     |
| 0 | 2 | CD55       |
| 0 | 2 | RCSD1      |
| 0 | 2 | HVCN1      |
| 0 | 2 | SMCHD1     |
| 0 | 2 | ZCCHC7     |
| 0 | 2 | RAB30      |
| 0 | 2 | CD79B      |
| 0 | 2 | TRAK1      |
| 0 | 2 | EZR        |
| 0 | 2 | PDE7A      |
| 0 | 2 | RHOH       |
| 0 | 2 | FCER2      |
| 0 | 2 | SNED1      |
| 0 | 2 | RB1        |
| 0 | 2 | STAP1      |
| 0 | 2 | STRBP      |
| 0 | 2 | MICAL3     |
| 0 | 2 | MTSS1      |
| 0 | 2 | ORAI2      |
| 0 | 2 | SMIM14     |
| 0 | 2 | AP002075.1 |
| 0 | 2 | AC119396.1 |
| 0 | 2 | EIF2AK3    |
| 0 | 2 | GNB5       |
| 0 | 2 | CD72       |
| 0 | 2 | TMEM131L   |
| 0 | 2 | HLA-DMB    |
| 0 | 2 | SNX9       |
| 0 | 2 | HLA-DPA1   |
| 0 | 2 | TMEM123    |
| 0 | 2 | RBM38      |
| 0 | 2 | STEAP1B    |
| 0 | 2 | MAP4K4     |
| 0 | 2 | FAM49A     |
| 0 | 2 | PRDM2      |
| 0 | 2 | STAG3      |
| 0 | 2 | LY86       |

|   |   |            |
|---|---|------------|
| 0 | 2 | TUBB6      |
| 0 | 2 | LSM7       |
| 0 | 2 | ABHD15-AS1 |
| 0 | 2 | STX7       |
| 0 | 2 | TPD52      |
| 0 | 2 | DENND5B    |
| 0 | 2 | PARP15     |
| 0 | 2 | PHACTR1    |
| 0 | 2 | HLA-DMA    |
| 0 | 2 | UVRAG      |
| 0 | 2 | IFT57      |
| 0 | 2 | DMXL1      |
| 0 | 2 | DLEU2      |
| 0 | 2 | BORCS5     |
| 0 | 2 | ZNF331     |
| 0 | 2 | MEF2A      |
| 0 | 2 | IGHM       |
| 0 | 2 | CAMK2D     |
| 0 | 2 | TRIO       |
| 0 | 2 | NOTCH2     |
| 0 | 2 | ALG13      |
| 0 | 2 | PRKCB      |
| 0 | 2 | GAB1       |
| 0 | 2 | ZHX2       |
| 0 | 2 | HLA-DRB1   |
| 0 | 2 | WDFY2      |
| 0 | 2 | 8-Mar      |
| 0 | 2 | PTK2       |
| 0 | 2 | MANBA      |
| 0 | 2 | EIF1AY     |
| 0 | 2 | REV3L      |
| 0 | 2 | GRK5       |
| 0 | 2 | EEF1B2     |
| 0 | 2 | RUBCN      |
| 0 | 2 | PKIG       |
| 0 | 2 | SEL1L3     |
| 0 | 2 | FAM177B    |
| 0 | 2 | P2RX5      |
| 0 | 2 | PIKFYVE    |
| 0 | 2 | CD24       |
| 0 | 2 | WASHC4     |
| 0 | 2 | FCMR       |
| 0 | 2 | AC079921.1 |

|   |   |            |
|---|---|------------|
| 0 | 2 | NIN        |
| 0 | 2 | GPR18      |
| 0 | 2 | RFTN1      |
| 0 | 2 | RASGRP2    |
| 0 | 2 | GNA12      |
| 0 | 2 | ANGPTL1    |
| 0 | 2 | USP6NL     |
| 0 | 2 | CMSS1      |
| 0 | 2 | TBC1D5     |
| 0 | 2 | PARVB      |
| 0 | 2 | USP8       |
| 0 | 2 | PLEKHA2    |
| 0 | 2 | ARHGEF18   |
| 0 | 2 | POU2F2     |
| 0 | 2 | TMEM131    |
| 0 | 2 | STIM2      |
| 0 | 2 | FAM210A    |
| 0 | 2 | DGKD       |
| 0 | 2 | HERPUD1    |
| 0 | 2 | FAM30A     |
| 0 | 2 | SH2B3      |
| 0 | 2 | BTG1       |
| 0 | 2 | TMEM243    |
| 0 | 2 | CD19       |
| 0 | 2 | DENND4A    |
| 0 | 2 | SAV1       |
| 0 | 2 | AP1B1      |
| 0 | 2 | SPIB       |
| 0 | 2 | NCF1       |
| 0 | 2 | NCOA3      |
| 0 | 2 | AP003086.1 |
| 0 | 2 | KDM4B      |
| 0 | 2 | GSAP       |
| 0 | 2 | PDLIM1     |
| 0 | 2 | GRK3       |
| 0 | 2 | SNX8       |
| 0 | 2 | YPEL5      |
| 0 | 2 | BMP2K      |
| 0 | 2 | OTUD1      |
| 0 | 2 | ANKRD13A   |
| 0 | 2 | ARRDC2     |
| 0 | 2 | CD52       |
| 0 | 2 | NGLY1      |

|   |   |          |
|---|---|----------|
| 0 | 2 | KLF2     |
| 0 | 2 | NFKBID   |
| 0 | 2 | GGA2     |
| 0 | 2 | EHMT1    |
| 0 | 2 | RIC1     |
| 0 | 2 | SKIL     |
| 0 | 2 | RRAS2    |
| 0 | 2 | EEF1G    |
| 0 | 2 | SYK      |
| 0 | 2 | ADK      |
| 0 | 2 | BPTF     |
| 0 | 2 | DRAM2    |
| 0 | 2 | RASGEF1B |
| 0 | 2 | E2F5     |
| 0 | 2 | ITPR1    |
| 0 | 2 | IL16     |
| 0 | 2 | ATF7IP2  |
| 0 | 2 | RHEX     |
| 0 | 2 | SC5D     |
| 0 | 2 | DDX21    |
| 0 | 2 | RLF      |
| 0 | 2 | UST      |
| 0 | 2 | C16orf74 |
| 0 | 2 | NR4A2    |
| 0 | 2 | ANKRD11  |
| 0 | 2 | HIP1R    |
| 0 | 2 | SP100    |
| 0 | 2 | ZNF10    |
| 0 | 2 | SIDT1    |
| 0 | 2 | CLEC17A  |
| 0 | 2 | PAWR     |
| 0 | 2 | PRDM4    |
| 0 | 2 | SESTD1   |
| 0 | 2 | FARP2    |
| 0 | 2 | CNR2     |
| 0 | 2 | SKAP2    |
| 0 | 2 | CXCR5    |
| 0 | 2 | TAF1D    |
| 0 | 2 | NOP53    |
| 0 | 2 | HLA-DOB  |
| 0 | 2 | ZNF318   |
| 0 | 2 | ATP2A3   |
| 0 | 2 | SLC44A2  |

|   |   |            |
|---|---|------------|
| 0 | 2 | JAZF1      |
| 0 | 2 | SP140      |
| 0 | 2 | SESN3      |
| 0 | 2 | PPFIBP2    |
| 0 | 2 | FAM117B    |
| 0 | 2 | SMAP2      |
| 0 | 2 | PIGB       |
| 0 | 2 | REL        |
| 0 | 2 | SPTLC2     |
| 0 | 2 | BLNK       |
| 0 | 2 | RRM2B      |
| 0 | 2 | RABEP2     |
| 0 | 2 | TUT4       |
| 0 | 2 | CCDC50     |
| 0 | 2 | IQSEC1     |
| 0 | 2 | TRAPPC8    |
| 0 | 2 | TRIM38     |
| 0 | 2 | BACH1      |
| 0 | 2 | PHF20      |
| 0 | 2 | LYL1       |
| 0 | 2 | NUP88      |
| 0 | 2 | AC027097.2 |
| 0 | 2 | ARID1B     |
| 0 | 2 | BTK        |
| 0 | 2 | CXCR4      |
| 0 | 2 | KMT2E      |
| 0 | 2 | TBC1D22A   |
| 0 | 2 | CAMK1D     |
| 0 | 2 | USP34      |
| 0 | 2 | RNASE6     |
| 0 | 2 | BTLA       |
| 0 | 2 | SNX25      |
| 0 | 2 | P2RX1      |
| 0 | 2 | BRAF       |
| 0 | 2 | FAU        |
| 0 | 2 | CD40       |
| 0 | 2 | PAN3       |
| 0 | 2 | RACK1      |
| 0 | 2 | ITSN2      |
| 0 | 2 | RASGRP3    |
| 0 | 2 | SH3BP5     |
| 0 | 2 | YWHAZ      |
| 0 | 2 | BCAS4      |



|           |   |            |
|-----------|---|------------|
| 0         | 2 | CEPT1      |
| 0         | 2 | MAPK8IP3   |
| 0         | 2 | CCR7       |
| 0         | 2 | MYCBP2     |
| 0         | 2 | UTRN       |
| 0         | 2 | FGD2       |
| 0         | 2 | CDCA7L     |
| 0         | 2 | WDR27      |
| 0         | 2 | AC079793.1 |
| 0         | 2 | DAPP1      |
| 0         | 2 | CCND3      |
| 0         | 2 | KDM6B      |
| 0         | 2 | CHD7       |
| 0         | 2 | RNASET2    |
| 0         | 2 | ZBTB10     |
| 0         | 2 | SLC9A7     |
| 0         | 2 | CYBB       |
| 0         | 2 | MOB3B      |
| 0         | 2 | AP000787.1 |
| 0         | 2 | ARHGAP15   |
| 0         | 2 | POU2AF1    |
| 0         | 2 | SHISAL2A   |
| 0         | 2 | RASSF2     |
| 0         | 2 | PLAC8      |
| 0         | 2 | H3F3A      |
| 0         | 2 | TSPAN3     |
| 0         | 2 | TSPAN33    |
| 0         | 2 | ZFAS1      |
| 0         | 2 | EEF1A1     |
| 0         | 2 | EEF2       |
| 0         | 2 | GAS5       |
| 0         | 2 | PFDN5      |
| 0         | 2 | NACA       |
| 0         | 2 | UBA52      |
| 0         | 2 | PDE4B      |
| 2.59E-301 | 2 | PXK        |
| 2.88E-301 | 2 | RNF144B    |
| 5.06E-300 | 2 | FOXP1      |
| 1.22E-298 | 2 | OSER1      |
| 1.64E-298 | 2 | XYLT1      |
| 5.61E-298 | 2 | RABEP1     |
| 7.56E-297 | 2 | CARD11     |
| 2.15E-296 | 2 | KDM4C      |

|           |   |         |
|-----------|---|---------|
| 3.17E-296 | 2 | GNA13   |
| 1.20E-295 | 2 | TAPT1   |
| 3.60E-294 | 2 | SF1     |
| 9.18E-294 | 2 | LAT2    |
| 2.91E-293 | 2 | MCTP2   |
| 3.24E-293 | 2 | MTFR1   |
| 5.36E-293 | 2 | SYPL1   |
| 1.28E-291 | 2 | PWP1    |
| 1.55E-291 | 2 | CD2AP   |
| 2.12E-288 | 2 | PTMA    |
| 8.04E-286 | 2 | APPL1   |
| 4.76E-284 | 2 | MAP3K1  |
| 3.02E-283 | 2 | LTB     |
| 6.44E-283 | 2 | EIF4G3  |
| 8.17E-282 | 2 | SMC6    |
| 8.28E-281 | 2 | FAM13B  |
| 2.05E-280 | 2 | EIF3E   |
| 2.06E-279 | 2 | RNMT    |
| 4.87E-278 | 2 | CIITA   |
| 1.59E-274 | 2 | TRIM44  |
| 1.46E-273 | 2 | CMTM6   |
| 1.99E-273 | 2 | DENND3  |
| 2.86E-273 | 2 | PILRB   |
| 3.46E-272 | 2 | TNRC6B  |
| 5.15E-272 | 2 | RAB11A  |
| 8.34E-272 | 2 | C7orf50 |
| 4.53E-271 | 2 | ZCCHC10 |
| 2.48E-269 | 2 | FCGR2B  |
| 2.58E-269 | 2 | MTMR6   |
| 1.24E-268 | 2 | AGPAT5  |
| 3.99E-268 | 2 | LRRFIP1 |
| 1.55E-267 | 2 | BBX     |
| 5.27E-267 | 2 | SP140L  |
| 2.27E-266 | 2 | SIPA1   |
| 5.70E-266 | 2 | RIC3    |
| 3.55E-264 | 2 | FILIP1L |
| 6.82E-264 | 2 | EAF2    |
| 2.01E-261 | 2 | RHBDD1  |
| 5.24E-261 | 2 | RBM26   |
| 6.17E-261 | 2 | ILRUN   |
| 3.06E-260 | 2 | SSBP2   |
| 6.42E-260 | 2 | MDM4    |
| 8.55E-260 | 2 | ZNF107  |

|           |   |             |
|-----------|---|-------------|
| 1.14E-258 | 2 | MTPN        |
| 1.41E-258 | 2 | TGFBR2      |
| 4.35E-258 | 2 | HIF1A       |
| 1.97E-256 | 2 | STX5        |
| 2.05E-254 | 2 | CEP170      |
| 5.82E-252 | 2 | CHD9        |
| 1.27E-251 | 2 | SNHG7       |
| 1.89E-251 | 2 | ELF1        |
| 2.18E-251 | 2 | CD48        |
| 6.13E-251 | 2 | LIMD2       |
| 1.19E-250 | 2 | LMBRD1      |
| 1.98E-250 | 2 | TRAF5       |
| 4.72E-250 | 2 | PABPC1      |
| 3.68E-248 | 2 | ZNF141      |
| 6.98E-246 | 2 | SLC12A6     |
| 8.50E-245 | 2 | DTNBP1      |
| 2.33E-244 | 2 | SMDT1       |
| 1.09E-243 | 2 | GAB2        |
| 4.08E-243 | 2 | IMMP2L      |
| 4.99E-243 | 2 | ELL2        |
| 2.00E-241 | 2 | ELMO1       |
| 9.48E-240 | 2 | BTBD9       |
| 3.81E-235 | 2 | ATP2B1      |
| 6.40E-235 | 2 | ERGIC1      |
| 1.98E-234 | 2 | TCOF1       |
| 2.64E-234 | 2 | BOD1L1      |
| 2.97E-234 | 2 | CD69        |
| 3.31E-232 | 2 | TPK1        |
| 4.72E-232 | 2 | NFATC1      |
| 6.93E-232 | 2 | PARP14      |
| 8.18E-232 | 2 | ADD3        |
| 3.03E-230 | 2 | STAT6       |
| 3.16E-230 | 2 | PALM2-AKAP2 |
| 9.89E-230 | 2 | SLC37A1     |
| 2.10E-228 | 2 | EEF1D       |
| 4.46E-226 | 2 | AP1S3       |
| 2.18E-225 | 2 | TXNIP       |
| 1.14E-222 | 2 | TBC1D9      |
| 1.54E-222 | 2 | SNU13       |
| 2.98E-222 | 2 | NR3C2       |
| 7.05E-222 | 2 | RAB3GAP1    |
| 3.74E-221 | 2 | STK17A      |
| 5.41E-221 | 2 | CNTRL       |

|           |   |            |
|-----------|---|------------|
| 1.25E-219 | 2 | USP12      |
| 9.53E-219 | 2 | PMEPA1     |
| 2.47E-218 | 2 | USP24      |
| 1.23E-216 | 2 | PRKD3      |
| 8.84E-216 | 2 | SP110      |
| 1.31E-214 | 2 | TP53INP1   |
| 4.60E-213 | 2 | ZBTB20     |
| 1.09E-212 | 2 | SERP1      |
| 1.08E-211 | 2 | MAP3K8     |
| 5.67E-211 | 2 | NFX1       |
| 8.26E-209 | 2 | MAN1A1     |
| 1.52E-208 | 2 | PIK3AP1    |
| 6.53E-208 | 2 | AC004687.1 |
| 1.23E-207 | 2 | IL13RA1    |
| 1.28E-207 | 2 | AGO2       |
| 1.42E-206 | 2 | MOB3A      |
| 3.14E-206 | 2 | KLF7       |
| 4.15E-206 | 2 | ZFP36L2    |
| 1.20E-204 | 2 | EVI5       |
| 3.93E-202 | 2 | TMEM62     |
| 3.64E-201 | 2 | MFSD4B     |
| 5.94E-201 | 2 | USPL1      |
| 4.48E-200 | 2 | CALHM6     |
| 6.76E-200 | 2 | RGS19      |
| 4.59E-197 | 2 | PACS1      |
| 5.93E-197 | 2 | TAF4B      |
| 4.60E-195 | 2 | UXT        |
| 5.52E-194 | 2 | RBM39      |
| 5.63E-194 | 2 | PDE8A      |
| 1.27E-192 | 2 | FNIP1      |
| 8.98E-192 | 2 | AL035634.1 |
| 2.04E-191 | 2 | C9orf72    |
| 3.55E-191 | 2 | CCDC6      |
| 5.26E-191 | 2 | DYRK1A     |
| 4.29E-189 | 2 | STX17-AS1  |
| 9.37E-189 | 2 | DLEU1      |
| 1.77E-188 | 2 | PIK3CA     |
| 3.06E-188 | 2 | SNHG29     |
| 1.80E-186 | 2 | PELI2      |
| 3.02E-186 | 2 | SIK3       |
| 5.24E-186 | 2 | NR4A3      |
| 4.16E-185 | 2 | SPOPL      |
| 5.73E-185 | 2 | RBM6       |

|           |   |           |
|-----------|---|-----------|
| 1.10E-183 | 2 | EBLN3P    |
| 2.55E-183 | 2 | UTY       |
| 1.47E-182 | 2 | SAMD4A    |
| 1.67E-182 | 2 | SLC25A6   |
| 2.46E-182 | 2 | CCDC93    |
| 4.82E-182 | 2 | ARPC3     |
| 9.04E-182 | 2 | NSD3      |
| 1.10E-181 | 2 | SMC5      |
| 1.20E-181 | 2 | AFF4      |
| 2.06E-181 | 2 | SRPK2     |
| 3.26E-181 | 2 | DDX17     |
| 1.19E-179 | 2 | 3-Mar     |
| 3.96E-179 | 2 | BIRC3     |
| 9.39E-178 | 2 | KLF3      |
| 1.08E-177 | 2 | PUM2      |
| 1.20E-176 | 2 | SYNGR2    |
| 1.85E-176 | 2 | ATL2      |
| 1.96E-176 | 2 | SEPTIN7   |
| 2.22E-176 | 2 | GIT2      |
| 5.70E-176 | 2 | SNX3      |
| 6.23E-176 | 2 | POLD4     |
| 6.47E-176 | 2 | SRGAP2    |
| 1.56E-175 | 2 | PAK1      |
| 2.05E-175 | 2 | MARCKSL1  |
| 4.28E-175 | 2 | LINC01473 |
| 6.12E-174 | 2 | SIRT1     |
| 1.99E-173 | 2 | HCG18     |
| 2.31E-173 | 2 | EIF1B     |
| 3.19E-173 | 2 | ARL4A     |
| 9.19E-173 | 2 | GNPTAB    |
| 1.17E-172 | 2 | SETX      |
| 2.88E-172 | 2 | GOT1      |
| 2.89E-172 | 2 | RHOQ      |
| 6.90E-172 | 2 | FYTDD1    |
| 1.25E-171 | 2 | PPP4R3A   |
| 1.85E-171 | 2 | WDR43     |
| 3.79E-171 | 2 | CHCHD10   |
| 1.48E-170 | 2 | RNF138    |
| 1.03E-169 | 2 | PPM1K     |
| 1.78E-169 | 2 | KLHL24    |
| 2.67E-169 | 2 | NRIP1     |
| 4.72E-169 | 2 | AMZ1      |
| 1.24E-168 | 2 | RHBDF2    |

|           |   |            |
|-----------|---|------------|
| 2.56E-168 | 2 | AC104365.1 |
| 6.34E-167 | 2 | MBNL2      |
| 1.40E-166 | 2 | ABCB1      |
| 6.10E-166 | 2 | TMEM154    |
| 2.22E-165 | 2 | ZNF506     |
| 3.17E-165 | 2 | PEAK1      |
| 9.56E-165 | 2 | RPA2       |
| 2.24E-164 | 2 | SREBF2     |
| 5.04E-163 | 2 | TOMM7      |
| 1.34E-162 | 2 | AC008014.1 |
| 1.67E-162 | 2 | AC092120.3 |
| 1.92E-162 | 2 | ATF7IP     |
| 7.05E-161 | 2 | CASD1      |
| 2.29E-160 | 2 | SEC62      |
| 1.81E-159 | 2 | BANP       |
| 2.34E-158 | 2 | TBC1D1     |
| 3.61E-158 | 2 | LRCH1      |
| 4.86E-158 | 2 | RCN2       |
| 1.09E-157 | 2 | CDK13      |
| 2.39E-157 | 2 | CYFIP2     |
| 1.73E-156 | 2 | COMMD10    |
| 4.44E-156 | 2 | CD47       |
| 1.29E-155 | 2 | SCAF11     |
| 3.12E-155 | 2 | FAM214A    |
| 5.15E-154 | 2 | RAD51B     |
| 7.30E-154 | 2 | UPF2       |
| 8.77E-154 | 2 | MECP2      |
| 1.24E-153 | 2 | IL4R       |
| 3.96E-153 | 2 | PPP3CA     |
| 1.46E-152 | 2 | MFN1       |
| 6.07E-152 | 2 | AC007384.1 |
| 1.65E-151 | 2 | STK4       |
| 1.67E-151 | 2 | EIF4B      |
| 2.13E-151 | 2 | MIR29B2CHG |
| 5.06E-151 | 2 | TMEM117    |
| 9.25E-151 | 2 | OOEP       |
| 7.53E-150 | 2 | MTMR1      |
| 2.99E-149 | 2 | SIK2       |
| 4.66E-149 | 2 | CLASP2     |
| 6.19E-148 | 2 | TENT2      |
| 9.07E-148 | 2 | SNHG8      |
| 3.76E-147 | 2 | PIAS1      |
| 1.18E-146 | 2 | RABGAP1    |

|           |   |              |
|-----------|---|--------------|
| 2.36E-146 | 2 | GRB2         |
| 2.74E-146 | 2 | CHD1         |
| 1.63E-144 | 2 | DDX27        |
| 2.36E-144 | 2 | IDI1         |
| 2.94E-143 | 2 | CNPY3        |
| 3.11E-143 | 2 | DIP2B        |
| 4.29E-143 | 2 | LAPTM4A      |
| 4.55E-143 | 2 | USF3         |
| 2.04E-141 | 2 | BTF3         |
| 6.95E-141 | 2 | LINC-PINT    |
| 2.46E-139 | 2 | STAG1        |
| 1.41E-138 | 2 | AL050309.1   |
| 3.43E-138 | 2 | EIF2S3       |
| 5.84E-138 | 2 | HIF1A-AS3    |
| 8.37E-138 | 2 | SLC38A1      |
| 1.09E-137 | 2 | DCK          |
| 1.13E-137 | 2 | CDYL         |
| 1.15E-136 | 2 | RILPL2       |
| 4.77E-136 | 2 | USP9Y        |
| 1.00E-135 | 2 | RBFOX2       |
| 1.07E-135 | 2 | SPIDR        |
| 1.91E-135 | 2 | EIF3L        |
| 3.78E-135 | 2 | PPARD        |
| 1.54E-134 | 2 | ARIH1        |
| 1.59E-134 | 2 | EPB41L4A-AS1 |
| 2.04E-134 | 2 | ATP1B3       |
| 6.99E-133 | 2 | ZNF148       |
| 3.16E-132 | 2 | GDI2         |
| 6.53E-132 | 2 | ZSWIM6       |
| 2.14E-131 | 2 | CCNY         |
| 2.84E-131 | 2 | AIDA         |
| 3.37E-131 | 2 | ERP29        |
| 6.90E-131 | 2 | MYCBP2-AS1   |
| 5.88E-130 | 2 | ZFP36L1      |
| 2.54E-129 | 2 | MGMT         |
| 2.81E-129 | 2 | CSNK1D       |
| 4.41E-129 | 2 | CD53         |
| 5.23E-129 | 2 | GLO1         |
| 2.09E-128 | 2 | MOB1A        |
| 4.18E-128 | 2 | MED30        |
| 4.31E-128 | 2 | RARA         |
| 4.80E-128 | 2 | PHKB         |
| 3.49E-127 | 2 | SH3BGRL      |

|           |   |            |
|-----------|---|------------|
| 4.25E-127 | 2 | PUM1       |
| 7.07E-127 | 2 | AC245297.3 |
| 9.76E-127 | 2 | TCEA1      |
| 1.51E-126 | 2 | ITPR2      |
| 2.41E-126 | 2 | ZNF644     |
| 5.78E-126 | 2 | BICD1      |
| 8.81E-126 | 2 | SENP6      |
| 2.73E-125 | 2 | NRF1       |
| 2.95E-125 | 2 | CYTIP      |
| 3.08E-125 | 2 | FBXW11     |
| 1.02E-124 | 2 | IFNGR2     |
| 1.06E-123 | 2 | SBNO1      |
| 1.15E-123 | 2 | SMARCB1    |
| 1.39E-123 | 2 | KAT6A      |
| 2.96E-123 | 2 | USP36      |
| 1.09E-122 | 2 | PPIG       |
| 1.78E-122 | 2 | SEPTIN9    |
| 2.13E-122 | 2 | RSL24D1    |
| 2.70E-122 | 2 | SYS1       |
| 4.28E-122 | 2 | TASP1      |
| 1.05E-121 | 2 | LPGAT1     |
| 1.93E-121 | 2 | FAM76B     |
| 2.58E-121 | 2 | TRAF3      |
| 9.33E-121 | 2 | RUFY1      |
| 1.61E-120 | 2 | MED13L     |
| 3.57E-120 | 2 | SS18       |
| 6.98E-119 | 2 | ZFAND6     |
| 8.24E-119 | 2 | PARP1      |
| 1.37E-118 | 2 | WIPF2      |
| 1.39E-117 | 2 | RRP15      |
| 2.09E-117 | 2 | ZNF721     |
| 3.66E-117 | 2 | FBXO11     |
| 5.58E-117 | 2 | SCAPER     |
| 4.00E-116 | 2 | PCGF5      |
| 5.38E-116 | 2 | HNRNPK     |
| 1.61E-115 | 2 | TGFBR1     |
| 1.66E-115 | 2 | ARHGEF7    |
| 2.39E-115 | 2 | EIF3D      |
| 5.35E-115 | 2 | FAM133B    |
| 6.85E-115 | 2 | ATF6       |
| 1.57E-114 | 2 | HTT        |
| 2.76E-114 | 2 | NIPBL      |
| 3.11E-114 | 2 | CD164      |



|           |   |           |
|-----------|---|-----------|
| 8.80E-114 | 2 | TRA2A     |
| 1.03E-112 | 2 | RAB11FIP1 |
| 6.44E-112 | 2 | PPP6R3    |
| 1.36E-111 | 2 | SELENOO   |
| 2.59E-111 | 2 | SLBP      |
| 4.81E-111 | 2 | DBNL      |
| 5.39E-111 | 2 | FBL       |
| 5.61E-111 | 2 | DOCK2     |
| 9.71E-111 | 2 | HNRNPA1   |
| 4.51E-110 | 2 | EIF3F     |
| 5.86E-110 | 2 | 6-Mar     |
| 9.83E-110 | 2 | SETD2     |
| 1.80E-109 | 2 | SCFD2     |
| 2.88E-109 | 2 | CKAP2     |
| 7.16E-109 | 2 | SASH3     |
| 7.27E-109 | 2 | EPC2      |
| 1.83E-108 | 2 | NUP153    |
| 4.77E-108 | 2 | CLCN3     |
| 3.91E-107 | 2 | OFD1      |
| 4.23E-107 | 2 | CDK19     |
| 1.29E-106 | 2 | CYSTM1    |
| 5.01E-106 | 2 | INO80     |
| 1.96E-105 | 2 | CREBBP    |
| 7.98E-105 | 2 | PLEKHM2   |
| 2.18E-104 | 2 | DOCK11    |
| 2.20E-104 | 2 | LARP4B    |
| 4.23E-104 | 2 | KPNA5     |
| 1.48E-103 | 2 | COP1      |
| 1.48E-103 | 2 | WDPCP     |
| 1.96E-103 | 2 | MTREX     |
| 2.17E-103 | 2 | FAM3C     |
| 3.29E-103 | 2 | PHF3      |
| 4.25E-103 | 2 | BRD4      |
| 6.66E-103 | 2 | DDIT3     |
| 1.09E-102 | 2 | RCOR1     |
| 2.65E-102 | 2 | TGIF1     |
| 3.30E-102 | 2 | SETD5     |
| 3.35E-102 | 2 | CYB5R4    |
| 3.78E-102 | 2 | SHOC2     |
| 2.49E-101 | 2 | SLC25A33  |
| 2.63E-101 | 2 | XKR6      |
| 6.46E-101 | 2 | CWF19L2   |
| 4.02E-100 | 2 | NEK1      |

|           |   |            |
|-----------|---|------------|
| 5.42E-100 | 2 | AC092821.3 |
| 7.71E-100 | 2 | SELENOF    |
| 8.12E-100 | 2 | GTPBP1     |
| 1.33E-99  | 2 | USP9X      |
| 2.98E-98  | 2 | ZMYM2      |
| 3.74E-98  | 2 | AC025164.1 |
| 5.27E-98  | 2 | MIS18BP1   |
| 5.49E-98  | 2 | SCPEP1     |
| 8.41E-97  | 2 | WDR74      |
| 8.95E-97  | 2 | MKNK2      |
| 9.96E-97  | 2 | NSA2       |
| 1.13E-96  | 2 | CACUL1     |
| 1.50E-96  | 2 | CUL3       |
| 2.02E-96  | 2 | MCPH1      |
| 3.34E-96  | 2 | LRRC41     |
| 4.85E-96  | 2 | EIF3H      |
| 6.28E-96  | 2 | CMTM7      |
| 1.64E-95  | 2 | WAC        |
| 9.41E-94  | 2 | RNPS1      |
| 1.78E-93  | 2 | HNRNPD     |
| 2.06E-93  | 2 | HMGN1      |
| 3.33E-93  | 2 | MAPK1IP1L  |
| 4.57E-93  | 2 | GPBP1      |
| 4.63E-93  | 2 | DDX10      |
| 5.30E-93  | 2 | HEXA       |
| 1.75E-92  | 2 | SLC35F5    |
| 3.02E-92  | 2 | MAP3K2     |
| 6.57E-92  | 2 | ZBTB44     |
| 1.05E-91  | 2 | SNX10      |
| 1.08E-91  | 2 | ZNF791     |
| 1.71E-91  | 2 | SDE2       |
| 1.76E-91  | 2 | KIAA0355   |
| 2.23E-91  | 2 | PTBP2      |
| 4.21E-91  | 2 | CIRBP      |
| 1.21E-90  | 2 | CCNI       |
| 1.74E-90  | 2 | GTF2F2     |
| 2.58E-90  | 2 | NAA15      |
| 4.59E-90  | 2 | PHF10      |
| 3.07E-89  | 2 | HPS5       |
| 3.68E-89  | 2 | LAMTOR5    |
| 3.71E-88  | 2 | CNOT4      |
| 2.89E-87  | 2 | ABCB7      |
| 7.48E-87  | 2 | LRPPRC     |

|          |   |            |
|----------|---|------------|
| 8.74E-87 | 2 | MGA        |
| 9.81E-87 | 2 | SLC35D1    |
| 1.30E-86 | 2 | ZFY        |
| 3.06E-86 | 2 | SINHCAF    |
| 1.18E-85 | 2 | PPP4R3B    |
| 1.73E-85 | 2 | RAB8B      |
| 2.22E-85 | 2 | ATM        |
| 3.78E-85 | 2 | LINC02245  |
| 5.61E-85 | 2 | AC118549.1 |
| 1.37E-84 | 2 | KPNB1      |
| 1.47E-84 | 2 | MON2       |
| 3.02E-84 | 2 | NSF        |
| 3.68E-84 | 2 | UQCRH      |
| 1.07E-83 | 2 | PTDSS1     |
| 1.75E-83 | 2 | SECISBP2L  |
| 2.01E-83 | 2 | FER        |
| 7.69E-83 | 2 | RSF1       |
| 1.20E-82 | 2 | RFX3       |
| 3.11E-82 | 2 | TNPO1      |
| 8.36E-82 | 2 | MALT1      |
| 2.61E-81 | 2 | COMMD6     |
| 3.20E-81 | 2 | MICU2      |
| 3.51E-81 | 2 | TET3       |
| 3.76E-81 | 2 | OSGEP      |
| 4.28E-81 | 2 | AC068282.1 |
| 1.21E-80 | 2 | IQCB1      |
| 3.15E-80 | 2 | TRPM7      |
| 4.63E-80 | 2 | TCERG1     |
| 6.28E-80 | 2 | HNRNPDL    |
| 9.33E-80 | 2 | ZFAND3     |
| 1.10E-79 | 2 | UCP2       |
| 1.17E-79 | 2 | SET        |
| 3.51E-79 | 2 | WWP2       |
| 5.26E-79 | 2 | ZNF652     |
| 9.34E-79 | 2 | ARHGAP5    |
| 1.87E-78 | 2 | UIMC1      |
| 2.00E-78 | 2 | MDN1       |
| 5.75E-78 | 2 | EDEM1      |
| 1.13E-77 | 2 | ANKRD17    |
| 6.34E-77 | 2 | THRAP3     |
| 1.05E-76 | 2 | TSC22D2    |
| 1.39E-76 | 2 | TASOR2     |
| 2.77E-76 | 2 | SCAF8      |

|          |   |           |
|----------|---|-----------|
| 4.74E-76 | 2 | NIPA2     |
| 5.66E-76 | 2 | ITCH      |
| 6.34E-76 | 2 | LCOR      |
| 2.62E-75 | 2 | SRSF10    |
| 2.94E-75 | 2 | GTF2H1    |
| 4.98E-75 | 2 | MAP4K3    |
| 6.96E-75 | 2 | APP       |
| 1.81E-74 | 2 | CYP51A1   |
| 1.97E-74 | 2 | UTP6      |
| 2.88E-74 | 2 | LINC01004 |
| 5.60E-74 | 2 | SNHG14    |
| 2.09E-73 | 2 | LUC7L3    |
| 6.63E-73 | 2 | ATR       |
| 1.78E-72 | 2 | RSL1D1    |
| 2.44E-72 | 2 | PRCP      |
| 3.06E-72 | 2 | SEC24B    |
| 4.71E-72 | 2 | TTC27     |
| 5.36E-72 | 2 | SECISBP2  |
| 8.75E-72 | 2 | PLEKHF2   |
| 9.88E-72 | 2 | CCNT1     |
| 1.05E-71 | 2 | BCL2      |
| 2.23E-71 | 2 | CBFB      |
| 5.90E-71 | 2 | POGZ      |
| 6.41E-71 | 2 | NUP214    |
| 9.48E-71 | 2 | RBM3      |
| 4.48E-70 | 2 | GALNT1    |
| 1.46E-69 | 2 | ZNF33A    |
| 1.69E-69 | 2 | ZDHHC17   |
| 3.28E-69 | 2 | DYM       |
| 9.78E-69 | 2 | ACAP2     |
| 4.41E-68 | 2 | NEMF      |
| 2.41E-67 | 2 | RBBP8     |
| 6.83E-67 | 2 | HOMER1    |
| 8.15E-67 | 2 | HSH2D     |
| 2.72E-66 | 2 | PCNX4     |
| 2.94E-66 | 2 | SELENOH   |
| 7.59E-66 | 2 | ELMSAN1   |
| 1.22E-65 | 2 | CHCHD3    |
| 1.24E-65 | 2 | GATAD2B   |
| 1.35E-65 | 2 | BLOC1S2   |
| 1.73E-65 | 2 | MAP4K5    |
| 1.84E-65 | 2 | SMARCA2   |
| 4.27E-65 | 2 | RC3H1     |

|          |   |          |
|----------|---|----------|
| 5.20E-65 | 2 | SENP5    |
| 8.07E-65 | 2 | ADPGK    |
| 2.07E-64 | 2 | MTF2     |
| 2.61E-64 | 2 | NDUFAF6  |
| 9.61E-64 | 2 | PRRC2B   |
| 4.18E-63 | 2 | SLC16A7  |
| 5.85E-63 | 2 | PCF11    |
| 6.51E-63 | 2 | SLC25A32 |
| 7.75E-63 | 2 | BDP1     |
| 8.07E-63 | 2 | ZNF431   |
| 1.82E-62 | 2 | R3HDM2   |
| 3.96E-62 | 2 | TXNRD1   |
| 4.10E-62 | 2 | LRCH3    |
| 1.63E-61 | 2 | SAFB     |
| 2.20E-61 | 2 | LPIN1    |
| 2.56E-61 | 2 | AFTPH    |
| 6.86E-61 | 2 | COPA     |
| 7.83E-61 | 2 | DHX15    |
| 1.15E-60 | 2 | PARVG    |
| 1.23E-60 | 2 | MYO1E    |
| 1.92E-60 | 2 | VPS51    |
| 6.33E-60 | 2 | NR1H2    |
| 7.16E-60 | 2 | OIP5-AS1 |
| 9.09E-60 | 2 | CCDC32   |
| 4.10E-59 | 2 | RYK      |
| 4.22E-59 | 2 | OXR1     |
| 4.78E-59 | 2 | TFAM     |
| 6.12E-59 | 2 | TTC7A    |
| 3.22E-57 | 2 | VEGFB    |
| 7.17E-57 | 2 | PDS5A    |
| 1.82E-56 | 2 | TTC37    |
| 7.90E-56 | 2 | ERBIN    |
| 9.75E-56 | 2 | CDC40    |
| 1.58E-55 | 2 | MAD1L1   |
| 1.60E-55 | 2 | MARF1    |
| 1.61E-55 | 2 | PKN2     |
| 4.77E-55 | 2 | USP11    |
| 2.04E-54 | 2 | ERC1     |
| 2.36E-54 | 2 | SLC36A4  |
| 2.48E-54 | 2 | UMAD1    |
| 8.14E-54 | 2 | EEA1     |
| 8.44E-54 | 2 | TTC17    |
| 9.20E-54 | 2 | RAPGEF1  |

|          |   |             |
|----------|---|-------------|
| 1.09E-53 | 2 | ATAD2B      |
| 3.12E-53 | 2 | MAGT1       |
| 3.95E-53 | 2 | ESF1        |
| 6.64E-53 | 2 | GTF2I       |
| 8.66E-53 | 2 | CRCP        |
| 9.33E-52 | 2 | SOS2        |
| 2.62E-51 | 2 | INTS4       |
| 3.10E-51 | 2 | MAPK8       |
| 3.20E-51 | 2 | BMPR2       |
| 1.09E-50 | 2 | SNX5        |
| 1.47E-50 | 2 | THUMPD3-AS1 |
| 3.86E-50 | 2 | PLEKHO1     |
| 6.95E-50 | 2 | DCP1A       |
| 7.81E-50 | 2 | UBE3A       |
| 1.56E-49 | 2 | TLK2        |
| 1.15E-47 | 2 | TMF1        |
| 1.25E-47 | 2 | TAF3        |
| 4.29E-47 | 2 | WDR70       |
| 5.43E-47 | 2 | GTF2E2      |
| 7.05E-47 | 2 | PPP1CB      |
| 8.97E-47 | 2 | PLCL2       |
| 2.43E-46 | 2 | THEMIS2     |
| 1.24E-45 | 2 | HMBOX1      |
| 2.24E-45 | 2 | ARL5A       |
| 4.08E-45 | 2 | CCDC107     |
| 5.82E-45 | 2 | NBDY        |
| 1.55E-44 | 2 | ADIPOR2     |
| 2.05E-44 | 2 | NFYC        |
| 1.41E-43 | 2 | MBD4        |
| 1.42E-43 | 2 | RREB1       |
| 1.55E-43 | 2 | FBXL17      |
| 2.51E-43 | 2 | UBE2E1      |
| 8.07E-43 | 2 | EIF2A       |
| 8.19E-43 | 2 | ARHGAP25    |
| 9.77E-43 | 2 | ZDHHC14     |
| 1.23E-42 | 2 | CEP57       |
| 1.26E-42 | 2 | ULK4        |
| 2.25E-42 | 2 | ABHD17B     |
| 4.24E-42 | 2 | CERT1       |
| 1.49E-41 | 2 | SPOP        |
| 1.80E-41 | 2 | FOXJ3       |
| 3.42E-41 | 2 | CUL5        |
| 5.30E-41 | 2 | KLHL6       |

|          |   |            |
|----------|---|------------|
| 6.19E-41 | 2 | NR2C2      |
| 6.47E-41 | 2 | PUM3       |
| 6.57E-41 | 2 | SPEN       |
| 9.90E-41 | 2 | FBXO34     |
| 1.48E-40 | 2 | RSRC1      |
| 2.25E-40 | 2 | PRKRIP1    |
| 8.10E-40 | 2 | KCMF1      |
| 1.11E-39 | 2 | KPNA1      |
| 1.22E-39 | 2 | PMM2       |
| 3.64E-39 | 2 | RNGTT      |
| 1.77E-38 | 2 | SDCCAG8    |
| 2.90E-38 | 2 | VTA1       |
| 3.54E-38 | 2 | VRK2       |
| 5.31E-38 | 2 | DCTN4      |
| 6.89E-38 | 2 | DIAPH2     |
| 8.67E-37 | 2 | AP3B1      |
| 1.08E-36 | 2 | C1GALT1    |
| 2.62E-36 | 2 | ANKRD37    |
| 2.62E-36 | 2 | FMNL1      |
| 5.11E-36 | 2 | CDC27      |
| 6.58E-36 | 2 | HIPK3      |
| 3.33E-35 | 2 | MYO9A      |
| 4.18E-34 | 2 | SMG1       |
| 5.56E-33 | 2 | SLC24A1    |
| 9.70E-33 | 2 | FBXO33     |
| 4.36E-32 | 2 | CDC37      |
| 5.85E-31 | 2 | SIAH2      |
| 8.96E-31 | 2 | LCORL      |
| 9.27E-31 | 2 | ZMYM4      |
| 7.12E-30 | 2 | VPS41      |
| 2.35E-28 | 2 | AFF1       |
| 3.60E-27 | 2 | CDK11B     |
| 3.60E-25 | 2 | ELP4       |
| 6.82E-24 | 2 | HIPK2      |
| 8.44E-20 | 2 | MYO1D      |
| 9.66E-17 | 2 | PBX3       |
| 3.25E-15 | 2 | WWOX       |
| 7.70E-13 | 2 | GLA        |
| 0        | 3 | AL136456.1 |
| 0        | 3 | TNFRSF4    |
| 0        | 3 | IL2RA      |
| 0        | 3 | IKZF2      |
| 0        | 3 | IL12RB2    |

|   |   |            |
|---|---|------------|
| 0 | 3 | TNFRSF18   |
| 0 | 3 | PLCL1      |
| 0 | 3 | FAAH2      |
| 0 | 3 | CTLA4      |
| 0 | 3 | BATF       |
| 0 | 3 | LINC02694  |
| 0 | 3 | RTKN2      |
| 0 | 3 | LINC02099  |
| 0 | 3 | ICOS       |
| 0 | 3 | PHACTR2    |
| 0 | 3 | AC093865.1 |
| 0 | 3 | MAST4      |
| 0 | 3 | LDLRAD4    |
| 0 | 3 | TBC1D4     |
| 0 | 3 | STAM       |
| 0 | 3 | IL32       |
| 0 | 3 | CRADD      |
| 0 | 3 | THADA      |
| 0 | 3 | TNIK       |
| 0 | 3 | DUSP16     |
| 0 | 3 | CADM1      |
| 0 | 3 | TIGIT      |
| 0 | 3 | NIBAN1     |
| 0 | 3 | MAP3K5     |
| 0 | 3 | GCNT1      |
| 0 | 3 | LAIR2      |
| 0 | 3 | RORA       |
| 0 | 3 | TSPAN5     |
| 0 | 3 | SKAP1      |
| 0 | 3 | CD247      |
| 0 | 3 | ICA1       |
| 0 | 3 | GLCCI1     |
| 0 | 3 | EPST11     |
| 0 | 3 | FOXP3      |
| 0 | 3 | ZEB1       |
| 0 | 3 | ZC3H12D    |
| 0 | 3 | CARD16     |
| 0 | 3 | HPGD       |
| 0 | 3 | DUSP4      |
| 0 | 3 | GPHN       |
| 0 | 3 | MAGEH1     |
| 0 | 3 | TRAF3      |
| 0 | 3 | CD28       |



|   |   |             |
|---|---|-------------|
| 0 | 3 | LINC01943   |
| 0 | 3 | TNFRSF9     |
| 0 | 3 | SMYD3       |
| 0 | 3 | ZC2HC1A     |
| 0 | 3 | ITK         |
| 0 | 3 | UGP2        |
| 0 | 3 | LAYN        |
| 0 | 3 | F5          |
| 0 | 3 | LY75        |
| 0 | 3 | CDK6        |
| 0 | 3 | PMAIP1      |
| 0 | 3 | MAF         |
| 0 | 3 | TTC39C      |
| 0 | 3 | SPOCK2      |
| 0 | 3 | PCBP3       |
| 0 | 3 | TSHZ2       |
| 0 | 3 | CASK        |
| 0 | 3 | USP47       |
| 0 | 3 | FOXO1       |
| 0 | 3 | IL1R1       |
| 0 | 3 | ZNF831      |
| 0 | 3 | GADD45A     |
| 0 | 3 | PHTF2       |
| 0 | 3 | CD2         |
| 0 | 3 | MIR4435-2HG |
| 0 | 3 | LTB         |
| 0 | 3 | HERC1       |
| 0 | 3 | FANK1       |
| 0 | 3 | ABCC1       |
| 0 | 3 | GPRIN3      |
| 0 | 3 | GBP5        |
| 0 | 3 | TOX2        |
| 0 | 3 | NCOA2       |
| 0 | 3 | FAM184A     |
| 0 | 3 | PTPRJ       |
| 0 | 3 | S100A4      |
| 0 | 3 | NETO2       |
| 0 | 3 | PBXIP1      |
| 0 | 3 | FYN         |
| 0 | 3 | CRY1        |
| 0 | 3 | SLAMF1      |
| 0 | 3 | IL6ST       |
| 0 | 3 | HNRNPLL     |

|   |   |            |
|---|---|------------|
| 0 | 3 | PBX4       |
| 0 | 3 | NOP58      |
| 0 | 3 | ARID5B     |
| 0 | 3 | SAMHD1     |
| 0 | 3 | CEP120     |
| 0 | 3 | TRAC       |
| 0 | 3 | TLK1       |
| 0 | 3 | CNST       |
| 0 | 3 | GK         |
| 0 | 3 | IPCEF1     |
| 0 | 3 | RAPGEF6    |
| 0 | 3 | FAS        |
| 0 | 3 | SPATS2L    |
| 0 | 3 | ZNRF2      |
| 0 | 3 | SYNE2      |
| 0 | 3 | AC013652.1 |
| 0 | 3 | CAMK4      |
| 0 | 3 | PKIA       |
| 0 | 3 | HS3ST3B1   |
| 0 | 3 | RHBDD2     |
| 0 | 3 | CCR6       |
| 0 | 3 | MRPL1      |
| 0 | 3 | DOCK10     |
| 0 | 3 | ZNF292     |
| 0 | 3 | ZC3H12C    |
| 0 | 3 | TOX        |
| 0 | 3 | PVT1       |
| 0 | 3 | CORO1B     |
| 0 | 3 | ZBTB38     |
| 0 | 3 | DNPH1      |
| 0 | 3 | CD7        |
| 0 | 3 | ZC3H7A     |
| 0 | 3 | VPS54      |
| 0 | 3 | KLHL2      |
| 0 | 3 | CYTOR      |
| 0 | 3 | RASGRP1    |
| 0 | 3 | TAB2       |
| 0 | 3 | GBP2       |
| 0 | 3 | IL18R1     |
| 0 | 3 | APBB1IP    |
| 0 | 3 | SNX9       |
| 0 | 3 | USP15      |
| 0 | 3 | GATA3      |

|   |   |            |
|---|---|------------|
| 0 | 3 | USP48      |
| 0 | 3 | MFHAS1     |
| 0 | 3 | CAST       |
| 0 | 3 | NPC1       |
| 0 | 3 | ETS1       |
| 0 | 3 | RORA-AS1   |
| 0 | 3 | NDUFV2     |
| 0 | 3 | CD27       |
| 0 | 3 | CLEC2D     |
| 0 | 3 | UHRF2      |
| 0 | 3 | JMY        |
| 0 | 3 | TRBC2      |
| 0 | 3 | AC104850.2 |
| 0 | 3 | NAB1       |
| 0 | 3 | NCK2       |
| 0 | 3 | PAM        |
| 0 | 3 | AAK1       |
| 0 | 3 | FYB1       |
| 0 | 3 | CNOT6L     |
| 0 | 3 | MSI2       |
| 0 | 3 | MCF2L2     |
| 0 | 3 | SOD1       |
| 0 | 3 | BIRC3      |
| 0 | 3 | CD4        |
| 0 | 3 | AC017002.5 |
| 0 | 3 | PHLDA1     |
| 0 | 3 | CXCR6      |
| 0 | 3 | SETD7      |
| 0 | 3 | ASXL1      |
| 0 | 3 | JAK1       |
| 0 | 3 | IL21R      |
| 0 | 3 | COX10-AS1  |
| 0 | 3 | BCL11B     |
| 0 | 3 | CUL3       |
| 0 | 3 | ZNRF1      |
| 0 | 3 | EPC1       |
| 0 | 3 | NAP1L4     |
| 0 | 3 | PRKCH      |
| 0 | 3 | TMEM173    |
| 0 | 3 | AC010609.1 |
| 0 | 3 | IL2RB      |
| 0 | 3 | PARD6G     |
| 0 | 3 | STK17B     |

|           |   |            |
|-----------|---|------------|
| 0         | 3 | PAK2       |
| 0         | 3 | CDC14A     |
| 0         | 3 | METTTL8    |
| 0         | 3 | ARNTL      |
| 0         | 3 | ZNF282     |
| 0         | 3 | COX10      |
| 0         | 3 | PELI1      |
| 0         | 3 | HTATIP2    |
| 0         | 3 | RCAN3      |
| 0         | 3 | STAT4      |
| 0         | 3 | LINC02195  |
| 0         | 3 | ADAT2      |
| 0         | 3 | IL7        |
| 0         | 3 | BICDL1     |
| 0         | 3 | IRS2       |
| 0         | 3 | TNFRSF25   |
| 0         | 3 | PTPRC      |
| 0         | 3 | IL7R       |
| 0         | 3 | AL121935.1 |
| 0         | 3 | LAPTM4B    |
| 0         | 3 | CHST7      |
| 0         | 3 | CD3D       |
| 0         | 3 | LRRC37B    |
| 0         | 3 | OPRM1      |
| 0         | 3 | CCR4       |
| 0         | 3 | LCK        |
| 0         | 3 | CUL9       |
| 0         | 3 | CD3E       |
| 0         | 3 | SIRPG      |
| 3.62E-302 | 3 | P2RY10     |
| 2.22E-300 | 3 | PRDM1      |
| 4.44E-298 | 3 | STAT3      |
| 2.72E-297 | 3 | CSGALNACT2 |
| 1.44E-296 | 3 | ATXN1      |
| 1.23E-294 | 3 | LAX1       |
| 5.98E-294 | 3 | AL121933.2 |
| 6.48E-294 | 3 | MALT1      |
| 8.61E-293 | 3 | LAT        |
| 7.65E-291 | 3 | GSPT1      |
| 1.96E-290 | 3 | PYHIN1     |
| 1.22E-289 | 3 | HLA-A      |
| 1.04E-288 | 3 | CASP8      |
| 1.14E-288 | 3 | TANK       |

|           |   |           |
|-----------|---|-----------|
| 2.41E-288 | 3 | CACYBP    |
| 5.62E-286 | 3 | CCDC66    |
| 6.42E-286 | 3 | LMTK2     |
| 1.10E-285 | 3 | BTG3      |
| 2.34E-285 | 3 | TIAM1     |
| 2.66E-285 | 3 | LEF1      |
| 1.23E-284 | 3 | DDHD1     |
| 1.44E-283 | 3 | ANKRD12   |
| 2.48E-282 | 3 | STAT5B    |
| 2.46E-280 | 3 | GLRX      |
| 2.50E-279 | 3 | PPM1G     |
| 1.17E-278 | 3 | IL2RG     |
| 4.37E-278 | 3 | RAP1A     |
| 1.24E-275 | 3 | RGS1      |
| 7.65E-275 | 3 | CCDC141   |
| 1.00E-273 | 3 | TRBC1     |
| 1.27E-273 | 3 | SH2D2A    |
| 7.87E-273 | 3 | HERC5     |
| 7.74E-272 | 3 | PRKCQ     |
| 1.02E-270 | 3 | SGPP2     |
| 1.32E-268 | 3 | NDFIP2    |
| 2.58E-267 | 3 | RDX       |
| 3.47E-263 | 3 | KAT2B     |
| 4.87E-262 | 3 | MBNL1     |
| 4.25E-261 | 3 | TMEM245   |
| 2.39E-260 | 3 | CD3G      |
| 9.91E-260 | 3 | RYBP      |
| 1.88E-259 | 3 | ARID4B    |
| 3.72E-258 | 3 | TNFRSF1B  |
| 5.97E-257 | 3 | 3-Mar     |
| 3.28E-255 | 3 | FOXN3     |
| 4.15E-254 | 3 | CABLES1   |
| 1.08E-252 | 3 | EIF3J     |
| 2.66E-252 | 3 | FRMD4B    |
| 8.00E-251 | 3 | ARHGEF12  |
| 1.40E-250 | 3 | OXNAD1    |
| 2.16E-250 | 3 | PPP1R16B  |
| 2.08E-249 | 3 | RAB11FIP1 |
| 8.02E-249 | 3 | NCALD     |
| 1.49E-248 | 3 | GPCPD1    |
| 2.53E-248 | 3 | MLLT3     |
| 3.79E-248 | 3 | LINC00513 |
| 2.09E-246 | 3 | CLIP1     |

|           |   |            |
|-----------|---|------------|
| 4.66E-244 | 3 | RNF19A     |
| 1.02E-243 | 3 | OPTN       |
| 9.73E-243 | 3 | LRBA       |
| 5.56E-242 | 3 | UXS1       |
| 6.30E-242 | 3 | BACH1      |
| 1.78E-241 | 3 | GNG2       |
| 2.02E-241 | 3 | LIMA1      |
| 2.17E-239 | 3 | FAM122C    |
| 3.96E-238 | 3 | CREM       |
| 6.39E-238 | 3 | ATP13A3    |
| 7.41E-238 | 3 | DGKE       |
| 2.78E-235 | 3 | JAZF1      |
| 1.02E-234 | 3 | CDKN1B     |
| 2.48E-234 | 3 | BCL2       |
| 2.86E-233 | 3 | CEP128     |
| 5.00E-233 | 3 | TTN        |
| 6.65E-233 | 3 | VDR        |
| 1.39E-232 | 3 | CCNG2      |
| 1.70E-231 | 3 | PGAP1      |
| 1.02E-230 | 3 | AF165147.1 |
| 6.99E-230 | 3 | G3BP2      |
| 1.08E-229 | 3 | ADAM10     |
| 2.51E-229 | 3 | CD5        |
| 3.15E-229 | 3 | SH2D1A     |
| 5.61E-229 | 3 | MAP3K1     |
| 1.45E-226 | 3 | AHR        |
| 2.82E-226 | 3 | SLA        |
| 8.21E-224 | 3 | LINC01578  |
| 6.08E-223 | 3 | SLC16A1    |
| 5.05E-222 | 3 | MICAL2     |
| 8.37E-221 | 3 | CTSC       |
| 3.73E-220 | 3 | YIPF6      |
| 6.57E-220 | 3 | ACOT9      |
| 8.73E-219 | 3 | CSNK1G3    |
| 2.11E-217 | 3 | PTPN22     |
| 2.17E-216 | 3 | TNFAIP3    |
| 2.43E-216 | 3 | TNRC6A     |
| 9.38E-215 | 3 | TUT7       |
| 2.30E-213 | 3 | ITM2A      |
| 4.38E-213 | 3 | CDC42SE2   |
| 1.32E-212 | 3 | AC009313.1 |
| 3.93E-212 | 3 | SH3KBP1    |
| 6.43E-211 | 3 | NR3C1      |

|           |   |            |
|-----------|---|------------|
| 1.42E-209 | 3 | TRIM59     |
| 5.60E-209 | 3 | STK24      |
| 8.13E-209 | 3 | PTTG1      |
| 1.02E-207 | 3 | CCND2      |
| 1.26E-207 | 3 | MBOAT1     |
| 3.13E-207 | 3 | CALM3      |
| 1.85E-206 | 3 | CFAP20     |
| 1.95E-206 | 3 | CD58       |
| 3.81E-206 | 3 | IFNAR2     |
| 9.54E-206 | 3 | ARL6IP5    |
| 9.55E-206 | 3 | LINC00649  |
| 2.20E-205 | 3 | CBLB       |
| 2.85E-205 | 3 | LEPROTL1   |
| 1.85E-204 | 3 | SGMS1      |
| 2.51E-204 | 3 | FLNB       |
| 1.13E-202 | 3 | VAV3       |
| 1.13E-202 | 3 | TRPS1      |
| 1.36E-202 | 3 | EIF4E3     |
| 2.48E-202 | 3 | MDFIC      |
| 2.57E-202 | 3 | AC016831.7 |
| 4.53E-202 | 3 | YWHAB      |
| 6.10E-202 | 3 | UBE2B      |
| 1.77E-201 | 3 | TOR1AIP2   |
| 1.96E-201 | 3 | THEM4      |
| 1.64E-200 | 3 | LUZP1      |
| 1.71E-200 | 3 | HIBCH      |
| 1.68E-199 | 3 | SLAIN2     |
| 2.95E-198 | 3 | PRDM2      |
| 1.18E-197 | 3 | ADK        |
| 1.38E-197 | 3 | PIM2       |
| 9.08E-197 | 3 | STIMATE    |
| 2.35E-196 | 3 | SEPTIN6    |
| 9.14E-196 | 3 | SARAF      |
| 4.98E-193 | 3 | PDE3B      |
| 7.89E-191 | 3 | AC073167.1 |
| 3.85E-190 | 3 | FTX        |
| 2.57E-189 | 3 | PRMT3      |
| 3.50E-189 | 3 | ZDBF2      |
| 4.50E-189 | 3 | PPP1R2     |
| 1.49E-188 | 3 | PAIP2      |
| 3.93E-188 | 3 | UBR5       |
| 1.34E-187 | 3 | GALM       |
| 1.66E-187 | 3 | SELL       |

|           |   |            |
|-----------|---|------------|
| 9.08E-185 | 3 | RNF213     |
| 1.91E-184 | 3 | RBPJ       |
| 6.36E-184 | 3 | ZNF281     |
| 6.53E-184 | 3 | UBE2K      |
| 3.51E-183 | 3 | AL133480.1 |
| 4.24E-182 | 3 | WAKMAR2    |
| 8.18E-182 | 3 | TSPAN14    |
| 8.64E-182 | 3 | RANBP9     |
| 2.15E-180 | 3 | LINC01619  |
| 4.27E-180 | 3 | HIVEP3     |
| 4.80E-180 | 3 | PRDX2      |
| 6.37E-179 | 3 | PICALM     |
| 5.15E-178 | 3 | FOXP1      |
| 3.20E-177 | 3 | CMSS1      |
| 2.76E-175 | 3 | NDFIP1     |
| 2.80E-175 | 3 | TULP4      |
| 6.45E-175 | 3 | DUSP10     |
| 1.36E-174 | 3 | STAMBPL1   |
| 2.18E-174 | 3 | NEK7       |
| 2.76E-174 | 3 | CCM2       |
| 1.58E-173 | 3 | GRSF1      |
| 1.95E-173 | 3 | DDX24      |
| 2.08E-173 | 3 | ODF2L      |
| 7.60E-173 | 3 | SAMSN1     |
| 2.55E-172 | 3 | SMAP2      |
| 4.73E-172 | 3 | FYCO1      |
| 5.89E-172 | 3 | ARHGEF6    |
| 8.09E-171 | 3 | BTBD11     |
| 1.32E-170 | 3 | ZC3HAV1    |
| 2.18E-170 | 3 | CDV3       |
| 3.64E-170 | 3 | B2M        |
| 1.31E-169 | 3 | PCED1B     |
| 3.85E-169 | 3 | RAB9A      |
| 4.55E-169 | 3 | WHRN       |
| 5.75E-169 | 3 | LRIG1      |
| 2.79E-167 | 3 | SCAND1     |
| 6.22E-167 | 3 | SAMD12     |
| 2.83E-165 | 3 | BABAM2     |
| 3.28E-165 | 3 | SESN3      |
| 4.30E-165 | 3 | INPP4B     |
| 4.55E-165 | 3 | C16orf87   |
| 2.56E-164 | 3 | LRRC8C     |
| 1.78E-163 | 3 | PLIN2      |



|           |   |            |
|-----------|---|------------|
| 5.78E-163 | 3 | AC104365.1 |
| 5.98E-163 | 3 | HIVEP1     |
| 9.74E-163 | 3 | PARK7      |
| 2.41E-162 | 3 | GBP4       |
| 4.89E-162 | 3 | RNF145     |
| 5.43E-162 | 3 | KIF5B      |
| 1.41E-161 | 3 | JAK3       |
| 1.24E-160 | 3 | PGM2L1     |
| 1.78E-160 | 3 | PHF21A     |
| 3.59E-160 | 3 | NSD3       |
| 1.01E-157 | 3 | MRFAP1     |
| 1.48E-157 | 3 | TNIP2      |
| 2.73E-157 | 3 | GLUD1      |
| 4.99E-157 | 3 | LINC-PINT  |
| 7.48E-157 | 3 | TENT5C     |
| 5.34E-156 | 3 | MORC3      |
| 6.06E-156 | 3 | GRAMD1B    |
| 1.55E-155 | 3 | BARD1      |
| 1.67E-155 | 3 | INPP5F     |
| 7.41E-155 | 3 | PIK3IP1    |
| 1.61E-154 | 3 | WWP1       |
| 1.87E-153 | 3 | CENPC      |
| 1.94E-153 | 3 | ERI1       |
| 3.13E-153 | 3 | SGTB       |
| 2.41E-152 | 3 | CDKAL1     |
| 4.92E-152 | 3 | SDF4       |
| 8.49E-152 | 3 | RFX7       |
| 1.01E-151 | 3 | YPEL2      |
| 1.05E-151 | 3 | ATP2B4     |
| 2.75E-148 | 3 | CTNNAL1    |
| 1.36E-147 | 3 | FAM53B     |
| 1.51E-147 | 3 | GOLGA8B    |
| 3.02E-147 | 3 | RANGAP1    |
| 4.98E-147 | 3 | SETD1B     |
| 8.52E-147 | 3 | IKZF1      |
| 1.87E-146 | 3 | TIFA       |
| 2.05E-146 | 3 | HPRT1      |
| 2.35E-146 | 3 | DLGAP1-AS1 |
| 3.49E-146 | 3 | PDCD4      |
| 5.30E-146 | 3 | CPEB3      |
| 2.31E-145 | 3 | MYO5A      |
| 6.36E-145 | 3 | COMMD3     |
| 5.39E-144 | 3 | SATB1      |

|           |   |            |
|-----------|---|------------|
| 1.17E-143 | 3 | CYTIP      |
| 4.29E-143 | 3 | GOLGA8A    |
| 9.77E-143 | 3 | GABPB1     |
| 1.02E-142 | 3 | PDCL3      |
| 2.47E-141 | 3 | L3MBTL3    |
| 2.64E-140 | 3 | ARHGDIB    |
| 4.07E-140 | 3 | LRRFIP2    |
| 1.16E-139 | 3 | AKIRIN2    |
| 1.17E-138 | 3 | KDM5B      |
| 1.30E-138 | 3 | SLC25A26   |
| 3.55E-138 | 3 | SYTL3      |
| 7.60E-138 | 3 | TESPA1     |
| 1.55E-137 | 3 | ATXN7L1    |
| 4.77E-137 | 3 | LBH        |
| 1.19E-136 | 3 | HBS1L      |
| 9.11E-136 | 3 | CCDC88C    |
| 1.43E-135 | 3 | TAX1BP1    |
| 1.54E-135 | 3 | IQGAP1     |
| 1.62E-135 | 3 | KIAA1109   |
| 1.85E-135 | 3 | REEP3      |
| 2.18E-135 | 3 | MRPS6      |
| 3.45E-135 | 3 | CMTM7      |
| 1.43E-133 | 3 | APOL6      |
| 8.00E-133 | 3 | CCSER2     |
| 1.21E-132 | 3 | TMEM263    |
| 1.44E-132 | 3 | CAB39      |
| 3.19E-132 | 3 | FAM160B1   |
| 9.89E-132 | 3 | WIPF1      |
| 2.11E-131 | 3 | CCDC167    |
| 2.12E-131 | 3 | RSBN1      |
| 3.92E-131 | 3 | GLB1       |
| 1.97E-129 | 3 | RGS10      |
| 2.56E-129 | 3 | CERK       |
| 2.61E-129 | 3 | AL035634.1 |
| 5.41E-129 | 3 | 7-Mar      |
| 5.77E-129 | 3 | EED        |
| 1.07E-128 | 3 | ZBTB1      |
| 1.37E-128 | 3 | CFLAR      |
| 4.41E-128 | 3 | SOX4       |
| 7.48E-128 | 3 | SEC14L1    |
| 1.68E-127 | 3 | AC058791.1 |
| 2.16E-127 | 3 | SMC4       |
| 2.18E-127 | 3 | TCF12      |

|           |   |            |
|-----------|---|------------|
| 9.97E-127 | 3 | FGD3       |
| 3.10E-126 | 3 | KAT6B      |
| 3.60E-124 | 3 | REXO2      |
| 9.42E-124 | 3 | PHLPP1     |
| 1.07E-123 | 3 | IL10RA     |
| 1.31E-123 | 3 | IFI16      |
| 1.68E-123 | 3 | TRAK2      |
| 2.02E-122 | 3 | FAM107B    |
| 5.49E-122 | 3 | SRGN       |
| 9.35E-122 | 3 | C9orf16    |
| 2.88E-121 | 3 | SLFN5      |
| 3.05E-121 | 3 | TCF20      |
| 4.42E-121 | 3 | WNK1       |
| 1.06E-120 | 3 | CHIC2      |
| 1.97E-120 | 3 | MIB1       |
| 2.21E-120 | 3 | OGDH       |
| 3.90E-120 | 3 | TG         |
| 6.27E-120 | 3 | KSR1       |
| 3.15E-119 | 3 | AC093010.2 |
| 3.76E-119 | 3 | CLK1       |
| 9.64E-119 | 3 | AP000787.1 |
| 1.16E-118 | 3 | ZMYM2      |
| 2.14E-118 | 3 | MBD2       |
| 2.49E-118 | 3 | FAM13A     |
| 3.47E-118 | 3 | SLC12A6    |
| 8.52E-118 | 3 | STK4       |
| 1.02E-117 | 3 | AC114760.2 |
| 1.36E-117 | 3 | NLRC5      |
| 7.36E-117 | 3 | BCAS3      |
| 2.14E-116 | 3 | ACTN4      |
| 2.86E-116 | 3 | FURIN      |
| 4.81E-116 | 3 | MSL2       |
| 2.71E-115 | 3 | CHD3       |
| 2.90E-115 | 3 | ITPKB      |
| 2.93E-115 | 3 | ARPC1B     |
| 5.89E-115 | 3 | STX16      |
| 1.18E-114 | 3 | TNIP3      |
| 1.35E-114 | 3 | HDAC7      |
| 1.42E-114 | 3 | NCOA1      |
| 2.41E-114 | 3 | WDR7       |
| 2.48E-114 | 3 | MINDY2     |
| 2.72E-114 | 3 | ASH1L      |
| 3.33E-114 | 3 | CREB3L2    |

|           |   |         |
|-----------|---|---------|
| 5.09E-114 | 3 | PPP4R2  |
| 1.22E-113 | 3 | SLC5A3  |
| 1.39E-113 | 3 | PSME4   |
| 2.90E-113 | 3 | FARS2   |
| 3.57E-113 | 3 | TSPYL2  |
| 4.68E-113 | 3 | STAT1   |
| 1.52E-112 | 3 | ATRX    |
| 2.16E-112 | 3 | SAMD9   |
| 2.21E-112 | 3 | DIAPH1  |
| 2.73E-112 | 3 | IQGAP2  |
| 5.85E-112 | 3 | PTPRA   |
| 6.26E-111 | 3 | ITGB1   |
| 1.11E-110 | 3 | NT5C3A  |
| 1.14E-109 | 3 | TMEM50A |
| 1.68E-109 | 3 | OGT     |
| 1.68E-109 | 3 | NF1     |
| 1.93E-109 | 3 | DGKH    |
| 2.25E-109 | 3 | TMOD3   |
| 2.38E-109 | 3 | OCIAD2  |
| 1.72E-108 | 3 | TRAF1   |
| 5.78E-108 | 3 | NFAT5   |
| 1.80E-107 | 3 | ARPP19  |
| 6.84E-107 | 3 | IGFLR1  |
| 1.17E-106 | 3 | ZFAND5  |
| 1.49E-106 | 3 | FXD5    |
| 4.88E-106 | 3 | EVL     |
| 7.68E-106 | 3 | SEC11C  |
| 7.78E-106 | 3 | PPP2CA  |
| 1.68E-105 | 3 | FAM118A |
| 3.28E-105 | 3 | NSF     |
| 9.61E-105 | 3 | SAT1    |
| 1.43E-104 | 3 | STK39   |
| 1.70E-104 | 3 | FILIP1L |
| 2.94E-104 | 3 | SAR1B   |
| 9.82E-104 | 3 | TACC3   |
| 2.11E-103 | 3 | HBP1    |
| 2.99E-103 | 3 | MTMR6   |
| 6.08E-103 | 3 | TMEM154 |
| 7.15E-103 | 3 | MXD4    |
| 7.84E-103 | 3 | TBL1XR1 |
| 2.29E-102 | 3 | TDRD3   |
| 2.30E-102 | 3 | CD96    |
| 2.72E-102 | 3 | GMFG    |

|           |   |            |
|-----------|---|------------|
| 9.11E-102 | 3 | PPP3CC     |
| 9.32E-102 | 3 | CYTH3      |
| 1.08E-101 | 3 | UBE2D2     |
| 1.80E-101 | 3 | VPS13C     |
| 5.44E-101 | 3 | EVI2A      |
| 1.24E-100 | 3 | TPR        |
| 1.26E-100 | 3 | CASP1      |
| 1.59E-100 | 3 | DOK2       |
| 2.00E-100 | 3 | CCDC91     |
| 5.15E-100 | 3 | CCDC6      |
| 1.05E-99  | 3 | RICTOR     |
| 1.13E-99  | 3 | BICRAL     |
| 2.32E-99  | 3 | SLC9A9     |
| 2.91E-98  | 3 | SMAP1      |
| 9.27E-98  | 3 | ARL15      |
| 1.40E-97  | 3 | CDC37L1    |
| 1.42E-97  | 3 | HLA-F      |
| 1.86E-97  | 3 | PMVK       |
| 1.98E-97  | 3 | LINC01934  |
| 2.06E-97  | 3 | FTO        |
| 2.26E-97  | 3 | CREBRF     |
| 2.49E-97  | 3 | AL137856.1 |
| 3.56E-97  | 3 | PSMD14     |
| 2.98E-96  | 3 | SYNJ2      |
| 3.16E-96  | 3 | ITGAL      |
| 4.13E-96  | 3 | TMPO       |
| 5.60E-96  | 3 | MAT2B      |
| 6.33E-96  | 3 | RAP1GDS1   |
| 9.93E-96  | 3 | XRN1       |
| 9.94E-96  | 3 | OTULIN     |
| 1.60E-95  | 3 | NDUFB8     |
| 3.85E-95  | 3 | HELB       |
| 4.74E-95  | 3 | ALDH9A1    |
| 1.99E-94  | 3 | GALNT10    |
| 2.18E-94  | 3 | KDM6A      |
| 3.72E-94  | 3 | TMX3       |
| 3.96E-94  | 3 | ITGA4      |
| 4.31E-94  | 3 | MFSD6      |
| 3.05E-93  | 3 | CAMK2D     |
| 2.22E-92  | 3 | FNBP1      |
| 2.97E-92  | 3 | NUDT5      |
| 6.56E-92  | 3 | EMB        |
| 9.22E-92  | 3 | EXT1       |

|          |   |             |
|----------|---|-------------|
| 9.37E-92 | 3 | PCED1B-AS1  |
| 1.13E-91 | 3 | CDR2        |
| 2.07E-91 | 3 | CEMIP2      |
| 8.50E-91 | 3 | AC016831.5  |
| 8.55E-91 | 3 | C17orf49    |
| 8.98E-91 | 3 | CHD2        |
| 9.38E-91 | 3 | CRTC3       |
| 1.65E-90 | 3 | MIER1       |
| 1.97E-90 | 3 | RBM33       |
| 2.49E-90 | 3 | ESR2        |
| 3.53E-90 | 3 | GLG1        |
| 4.24E-90 | 3 | TBC1D15     |
| 9.27E-90 | 3 | ADSS        |
| 1.04E-89 | 3 | FAM214A     |
| 1.21E-89 | 3 | SLTM        |
| 1.11E-88 | 3 | TMEM140     |
| 1.73E-88 | 3 | AUH         |
| 2.48E-88 | 3 | PIK3IP1-AS1 |
| 2.77E-88 | 3 | SUMO2       |
| 3.34E-88 | 3 | EPB41       |
| 1.55E-87 | 3 | KIAA0319L   |
| 2.39E-87 | 3 | CNIH1       |
| 4.63E-87 | 3 | HDAC4       |
| 6.26E-87 | 3 | RAB2A       |
| 6.91E-87 | 3 | SNRNP35     |
| 8.18E-87 | 3 | PSMB8       |
| 1.04E-86 | 3 | UBR2        |
| 1.10E-85 | 3 | OGA         |
| 1.20E-85 | 3 | PSPC1       |
| 1.65E-85 | 3 | SSH1        |
| 3.94E-85 | 3 | ISG15       |
| 4.52E-85 | 3 | CLASP1      |
| 4.95E-85 | 3 | PIK3R5      |
| 3.98E-84 | 3 | GPBP1       |
| 5.39E-84 | 3 | MOSMO       |
| 8.06E-84 | 3 | CRYBG1      |
| 2.07E-83 | 3 | PPHLN1      |
| 3.81E-83 | 3 | ZC3H18      |
| 4.11E-83 | 3 | STIM1       |
| 5.09E-83 | 3 | CHORDC1     |
| 6.41E-83 | 3 | SACM1L      |
| 9.18E-83 | 3 | MAN1A2      |
| 2.67E-82 | 3 | PSMA1       |

|          |   |          |
|----------|---|----------|
| 3.15E-82 | 3 | TTC7A    |
| 8.87E-82 | 3 | YAF2     |
| 1.90E-81 | 3 | WDR44    |
| 2.64E-81 | 3 | ELK3     |
| 3.50E-81 | 3 | ATXN2    |
| 4.03E-81 | 3 | PTPN1    |
| 6.30E-81 | 3 | RFFL     |
| 1.09E-80 | 3 | GTF3C6   |
| 1.19E-80 | 3 | IP6K1    |
| 1.49E-80 | 3 | RPRD2    |
| 1.83E-80 | 3 | PTPN4    |
| 5.51E-80 | 3 | GBF1     |
| 3.02E-79 | 3 | DDX6     |
| 3.17E-79 | 3 | ITFG1    |
| 8.83E-79 | 3 | FAM104A  |
| 9.65E-79 | 3 | MKLN1    |
| 1.09E-78 | 3 | PCNX1    |
| 1.11E-78 | 3 | ARAP2    |
| 4.93E-78 | 3 | N4BP2L2  |
| 4.34E-77 | 3 | AHSA1    |
| 4.74E-77 | 3 | PPP1R12A |
| 5.43E-77 | 3 | NUP58    |
| 7.55E-77 | 3 | EGLN1    |
| 1.28E-76 | 3 | ABI1     |
| 2.29E-76 | 3 | UCP2     |
| 7.20E-76 | 3 | ENO1     |
| 1.10E-75 | 3 | ATP9B    |
| 1.36E-75 | 3 | RIPOR2   |
| 1.77E-75 | 3 | SESN1    |
| 1.80E-75 | 3 | ARHGAP12 |
| 1.90E-75 | 3 | ARID2    |
| 2.83E-75 | 3 | ATG5     |
| 4.16E-75 | 3 | IFFO2    |
| 5.29E-75 | 3 | EXOC4    |
| 6.04E-75 | 3 | MYCBP2   |
| 6.11E-75 | 3 | IRF1     |
| 1.36E-74 | 3 | CD59     |
| 3.08E-74 | 3 | ZC3H8    |
| 5.33E-74 | 3 | EML4     |
| 7.10E-74 | 3 | ENTPD1   |
| 3.72E-73 | 3 | CUTA     |
| 3.75E-73 | 3 | CRLF3    |
| 1.99E-72 | 3 | OSBPL8   |

|          |   |          |
|----------|---|----------|
| 2.06E-72 | 3 | SPPL2A   |
| 2.17E-72 | 3 | SEC11A   |
| 3.00E-72 | 3 | ACSL4    |
| 3.17E-72 | 3 | DCAF8    |
| 9.60E-72 | 3 | FXR1     |
| 2.01E-71 | 3 | GMDS     |
| 2.31E-71 | 3 | ATXN7    |
| 2.75E-71 | 3 | C17orf67 |
| 6.80E-71 | 3 | TRPC4AP  |
| 1.61E-70 | 3 | ELOVL5   |
| 1.82E-70 | 3 | HLA-C    |
| 2.00E-70 | 3 | OTUD5    |
| 2.55E-70 | 3 | PPP2R5C  |
| 5.05E-70 | 3 | ARHGAP25 |
| 5.11E-70 | 3 | RASA1    |
| 1.66E-69 | 3 | PRKACB   |
| 1.50E-68 | 3 | TRIM14   |
| 2.73E-68 | 3 | ASCC3    |
| 3.02E-68 | 3 | ANKH     |
| 3.11E-68 | 3 | ESYT2    |
| 4.85E-68 | 3 | SORL1    |
| 6.41E-68 | 3 | PSMD1    |
| 8.14E-68 | 3 | ANKRD13C |
| 1.23E-66 | 3 | RBM27    |
| 2.75E-66 | 3 | MXI1     |
| 3.07E-66 | 3 | DYNC1I2  |
| 3.40E-66 | 3 | CAPZA2   |
| 4.55E-66 | 3 | AEBP2    |
| 2.84E-65 | 3 | CYTH1    |
| 5.67E-65 | 3 | PACS1    |
| 9.00E-65 | 3 | LRRC8D   |
| 7.06E-64 | 3 | ZMYND8   |
| 7.12E-64 | 3 | SPG11    |
| 1.51E-63 | 3 | ABHD18   |
| 2.01E-63 | 3 | ITGAV    |
| 2.06E-63 | 3 | VPS13B   |
| 2.96E-63 | 3 | SH3GLB1  |
| 4.76E-63 | 3 | RUNX2    |
| 6.83E-63 | 3 | KANSL1   |
| 1.49E-62 | 3 | RELCH    |
| 2.14E-62 | 3 | GIGYF2   |
| 3.52E-62 | 3 | AGFG1    |
| 1.26E-61 | 3 | SH3TC1   |



|          |   |          |
|----------|---|----------|
| 7.69E-61 | 3 | C18orf25 |
| 9.22E-61 | 3 | DTNB     |
| 1.02E-60 | 3 | NPTN     |
| 7.04E-60 | 3 | NAA25    |
| 3.99E-59 | 3 | IFI6     |
| 9.69E-59 | 3 | DGLUCY   |
| 1.27E-58 | 3 | PCCA     |
| 2.07E-58 | 3 | COX5A    |
| 1.15E-57 | 3 | AFTPH    |
| 8.50E-57 | 3 | PKM      |
| 2.34E-56 | 3 | AFF1     |
| 2.79E-56 | 3 | DCP2     |
| 2.44E-55 | 3 | CAPN7    |
| 3.32E-53 | 3 | ABTB2    |
| 4.88E-53 | 3 | NAA16    |
| 7.75E-53 | 3 | STIP1    |
| 2.00E-52 | 3 | BCL2L11  |
| 3.20E-52 | 3 | SHLD2    |
| 2.56E-51 | 3 | TYW1     |
| 4.71E-51 | 3 | CEP350   |
| 1.41E-50 | 3 | ARHGAP5  |
| 5.90E-50 | 3 | SLC4A7   |
| 7.08E-50 | 3 | MX1      |
| 6.79E-49 | 3 | AHCYL2   |
| 6.85E-49 | 3 | TNPO3    |
| 2.07E-48 | 3 | XIST     |
| 2.17E-48 | 3 | ATP8A1   |
| 2.47E-48 | 3 | RFX3     |
| 2.99E-48 | 3 | UBE2H    |
| 2.96E-46 | 3 | DIP2B    |
| 3.91E-45 | 3 | BTAf1    |
| 1.42E-43 | 3 | STT3B    |
| 8.59E-43 | 3 | SERINC5  |
| 6.15E-42 | 3 | CEP83    |
| 2.22E-41 | 3 | TMEM65   |
| 6.95E-40 | 3 | EXOC6B   |
| 9.30E-37 | 3 | CELF2    |
| 1.61E-36 | 3 | PDE4D    |
| 1.89E-32 | 3 | SLC1A4   |
| 5.83E-25 | 3 | MAP4K3   |
| 0        | 4 | EREG     |
| 0        | 4 | IL1B     |
| 0        | 4 | DOCK4    |

|   |   |            |
|---|---|------------|
| 0 | 4 | LYZ        |
| 0 | 4 | SLC16A10   |
| 0 | 4 | THBS1      |
| 0 | 4 | KYNU       |
| 0 | 4 | FMN1       |
| 0 | 4 | AL078604.4 |
| 0 | 4 | TIMP1      |
| 0 | 4 | PLXDC2     |
| 0 | 4 | IER3       |
| 0 | 4 | PID1       |
| 0 | 4 | RBM47      |
| 0 | 4 | CST3       |
| 0 | 4 | VCAN       |
| 0 | 4 | SLC8A1     |
| 0 | 4 | LRMDA      |
| 0 | 4 | G0S2       |
| 0 | 4 | FNIP2      |
| 0 | 4 | AC099489.1 |
| 0 | 4 | IFI30      |
| 0 | 4 | CXCL8      |
| 0 | 4 | PLAUR      |
| 0 | 4 | AIF1       |
| 0 | 4 | MCTP1      |
| 0 | 4 | EPB41L3    |
| 0 | 4 | SOD2       |
| 0 | 4 | FCER1G     |
| 0 | 4 | ABCA1      |
| 0 | 4 | DMXL2      |
| 0 | 4 | TYROBP     |
| 0 | 4 | DENND5A    |
| 0 | 4 | RAB31      |
| 0 | 4 | S100A9     |
| 0 | 4 | SPP1       |
| 0 | 4 | CXCL3      |
| 0 | 4 | CTSB       |
| 0 | 4 | C15orf48   |
| 0 | 4 | ALCAM      |
| 0 | 4 | CXCL2      |
| 0 | 4 | QKI        |
| 0 | 4 | AREG       |
| 0 | 4 | C5AR1      |
| 0 | 4 | FCGR2A     |
| 0 | 4 | FNDC3B     |

|   |   |          |
|---|---|----------|
| 0 | 4 | PAPSS2   |
| 0 | 4 | C1QB     |
| 0 | 4 | C1QA     |
| 0 | 4 | ABL2     |
| 0 | 4 | PTGS2    |
| 0 | 4 | IRAK3    |
| 0 | 4 | ATP13A3  |
| 0 | 4 | OLR1     |
| 0 | 4 | FMNL2    |
| 0 | 4 | PSAP     |
| 0 | 4 | FGD4     |
| 0 | 4 | CD14     |
| 0 | 4 | MS4A6A   |
| 0 | 4 | BCL2A1   |
| 0 | 4 | ETS2     |
| 0 | 4 | MRC1     |
| 0 | 4 | PLEK     |
| 0 | 4 | CSF2RA   |
| 0 | 4 | SESTD1   |
| 0 | 4 | RNF144B  |
| 0 | 4 | IL1RN    |
| 0 | 4 | FTL      |
| 0 | 4 | CCL20    |
| 0 | 4 | NLRP3    |
| 0 | 4 | DAPK1    |
| 0 | 4 | HLA-DRB1 |
| 0 | 4 | TYMP     |
| 0 | 4 | NFKB1    |
| 0 | 4 | LIMS1    |
| 0 | 4 | ABR      |
| 0 | 4 | ZEB2     |
| 0 | 4 | NEAT1    |
| 0 | 4 | EMILIN2  |
| 0 | 4 | CD163    |
| 0 | 4 | CD86     |
| 0 | 4 | MAMLD1   |
| 0 | 4 | ITGAX    |
| 0 | 4 | GLUL     |
| 0 | 4 | SIPA1L1  |
| 0 | 4 | SRGAP1   |
| 0 | 4 | MAP2K1   |
| 0 | 4 | ANXA5    |
| 0 | 4 | NAMPT    |

|   |   |            |
|---|---|------------|
| 0 | 4 | KMO        |
| 0 | 4 | VEGFA      |
| 0 | 4 | TET2       |
| 0 | 4 | DSE        |
| 0 | 4 | IRAK2      |
| 0 | 4 | CTSS       |
| 0 | 4 | CUX1       |
| 0 | 4 | CCL3       |
| 0 | 4 | HBEGF      |
| 0 | 4 | SERPINA1   |
| 0 | 4 | AC025580.2 |
| 0 | 4 | CD109      |
| 0 | 4 | MANBA      |
| 0 | 4 | FTH1       |
| 0 | 4 | GRN        |
| 0 | 4 | IFITM3     |
| 0 | 4 | GNAQ       |
| 0 | 4 | LUCAT1     |
| 0 | 4 | ICAM1      |
| 0 | 4 | PSD3       |
| 0 | 4 | ACSL1      |
| 0 | 4 | HLA-DRA    |
| 0 | 4 | LST1       |
| 0 | 4 | INHBA      |
| 0 | 4 | BASP1      |
| 0 | 4 | HLA-DPA1   |
| 0 | 4 | MS4A7      |
| 0 | 4 | JARID2     |
| 0 | 4 | SLC11A1    |
| 0 | 4 | MAFB       |
| 0 | 4 | TGFBI      |
| 0 | 4 | ASAP1      |
| 0 | 4 | NPC2       |
| 0 | 4 | MXD1       |
| 0 | 4 | PRKAG2     |
| 0 | 4 | FGL2       |
| 0 | 4 | ZFYVE16    |
| 0 | 4 | ZMIZ1      |
| 0 | 4 | TLR2       |
| 0 | 4 | KIF1B      |
| 0 | 4 | MYO9B      |
| 0 | 4 | ADGRE2     |
| 0 | 4 | AZIN1-AS1  |

|   |   |          |
|---|---|----------|
| 0 | 4 | WARS     |
| 0 | 4 | CLIC4    |
| 0 | 4 | CTSL     |
| 0 | 4 | AMPD3    |
| 0 | 4 | C1QC     |
| 0 | 4 | CPVL     |
| 0 | 4 | ARL8B    |
| 0 | 4 | CD68     |
| 0 | 4 | PIK3R5   |
| 0 | 4 | CTSZ     |
| 0 | 4 | S100A11  |
| 0 | 4 | FPR1     |
| 0 | 4 | FCN1     |
| 0 | 4 | MOB3B    |
| 0 | 4 | ARHGAP26 |
| 0 | 4 | SDS      |
| 0 | 4 | FLOT1    |
| 0 | 4 | SPAG9    |
| 0 | 4 | TCF7L2   |
| 0 | 4 | CYBB     |
| 0 | 4 | ANXA2    |
| 0 | 4 | IGSF6    |
| 0 | 4 | FAM49A   |
| 0 | 4 | NUMB     |
| 0 | 4 | FOXO3    |
| 0 | 4 | RAB20    |
| 0 | 4 | CTSD     |
| 0 | 4 | SLC43A2  |
| 0 | 4 | PPIF     |
| 0 | 4 | CCL3L1   |
| 0 | 4 | HCK      |
| 0 | 4 | PMP22    |
| 0 | 4 | MB21D2   |
| 0 | 4 | FCGRT    |
| 0 | 4 | LCP2     |
| 0 | 4 | SLC1A3   |
| 0 | 4 | RABGEF1  |
| 0 | 4 | NRP1     |
| 0 | 4 | PPARD    |
| 0 | 4 | MARCKS   |
| 0 | 4 | CD44     |
| 0 | 4 | CD74     |
| 0 | 4 | LITAF    |

|   |   |            |
|---|---|------------|
| 0 | 4 | MGAT1      |
| 0 | 4 | CCDC88A    |
| 0 | 4 | APOE       |
| 0 | 4 | RALA       |
| 0 | 4 | NRP2       |
| 0 | 4 | STX11      |
| 0 | 4 | SBF2       |
| 0 | 4 | HLA-DPB1   |
| 0 | 4 | AQP9       |
| 0 | 4 | LGALS1     |
| 0 | 4 | TMEM176B   |
| 0 | 4 | PSTPIP2    |
| 0 | 4 | DPYD       |
| 0 | 4 | AC079753.2 |
| 0 | 4 | SAT1       |
| 0 | 4 | SIRPA      |
| 0 | 4 | CLEC7A     |
| 0 | 4 | LGALS3     |
| 0 | 4 | HIF1A      |
| 0 | 4 | HLA-DQB1   |
| 0 | 4 | RIN2       |
| 0 | 4 | BNIP3L     |
| 0 | 4 | TNFAIP2    |
| 0 | 4 | LNCAROD    |
| 0 | 4 | ELOVL7     |
| 0 | 4 | SH3PXD2B   |
| 0 | 4 | AC009093.2 |
| 0 | 4 | CD63       |
| 0 | 4 | BCAT1      |
| 0 | 4 | SGK1       |
| 0 | 4 | ALDH2      |
| 0 | 4 | MNDA       |
| 0 | 4 | FPR3       |
| 0 | 4 | CTSH       |
| 0 | 4 | THBD       |
| 0 | 4 | SLCO3A1    |
| 0 | 4 | SLC39A8    |
| 0 | 4 | NCOR2      |
| 0 | 4 | ATP2B1     |
| 0 | 4 | B3GNT5     |
| 0 | 4 | LDLRAD3    |
| 0 | 4 | FBP1       |
| 0 | 4 | CALHM6     |

|   |   |            |
|---|---|------------|
| 0 | 4 | RAB7A      |
| 0 | 4 | FCGR3A     |
| 0 | 4 | UBE2E2     |
| 0 | 4 | GAB2       |
| 0 | 4 | ARHGAP31   |
| 0 | 4 | C1orf162   |
| 0 | 4 | MIR155HG   |
| 0 | 4 | CLEC10A    |
| 0 | 4 | NPHS1      |
| 0 | 4 | VIM        |
| 0 | 4 | NINJ1      |
| 0 | 4 | GSN        |
| 0 | 4 | PTPRE      |
| 0 | 4 | CD300E     |
| 0 | 4 | ST18       |
| 0 | 4 | CSF1R      |
| 0 | 4 | CIITA      |
| 0 | 4 | SGMS2      |
| 0 | 4 | IFNGR2     |
| 0 | 4 | NFE2L2     |
| 0 | 4 | PTPN12     |
| 0 | 4 | MAML3      |
| 0 | 4 | ANPEP      |
| 0 | 4 | BID        |
| 0 | 4 | RASGEF1B   |
| 0 | 4 | MMP19      |
| 0 | 4 | GK         |
| 0 | 4 | GRB2       |
| 0 | 4 | SERPINB1   |
| 0 | 4 | SPI1       |
| 0 | 4 | S100A8     |
| 0 | 4 | UPP1       |
| 0 | 4 | ARFGAP3    |
| 0 | 4 | MAFF       |
| 0 | 4 | LGALS2     |
| 0 | 4 | FLT1       |
| 0 | 4 | RHOQ       |
| 0 | 4 | MAP3K8     |
| 0 | 4 | TAOK3      |
| 0 | 4 | MIR181A1HG |
| 0 | 4 | S100A10    |
| 0 | 4 | RIN3       |
| 0 | 4 | BRI3       |

|   |   |            |
|---|---|------------|
| 0 | 4 | CAPG       |
| 0 | 4 | PFKFB3     |
| 0 | 4 | ATP1B3     |
| 0 | 4 | LHFPL2     |
| 0 | 4 | SEMA6B     |
| 0 | 4 | TREM1      |
| 0 | 4 | HLA-DQA1   |
| 0 | 4 | ACSL3      |
| 0 | 4 | ARHGAP10   |
| 0 | 4 | RASAL2     |
| 0 | 4 | SDC2       |
| 0 | 4 | ASAH1      |
| 0 | 4 | RETN       |
| 0 | 4 | CREB5      |
| 0 | 4 | KCTD12     |
| 0 | 4 | KLF4       |
| 0 | 4 | GPR183     |
| 0 | 4 | FAM151B    |
| 0 | 4 | NR4A3      |
| 0 | 4 | RNF130     |
| 0 | 4 | ITGB8      |
| 0 | 4 | GPR137B    |
| 0 | 4 | RAPGEF2    |
| 0 | 4 | DRAM1      |
| 0 | 4 | ZNF267     |
| 0 | 4 | TBXAS1     |
| 0 | 4 | APOC1      |
| 0 | 4 | RNASE1     |
| 0 | 4 | NCF2       |
| 0 | 4 | FGR        |
| 0 | 4 | SULF2      |
| 0 | 4 | IL1A       |
| 0 | 4 | PILRA      |
| 0 | 4 | MFSD1      |
| 0 | 4 | SASH1      |
| 0 | 4 | TPRA1      |
| 0 | 4 | PLSCR1     |
| 0 | 4 | AC083837.1 |
| 0 | 4 | IL6R       |
| 0 | 4 | AXL        |
| 0 | 4 | TOM1       |
| 0 | 4 | MMP9       |
| 0 | 4 | TNS3       |



|   |   |          |
|---|---|----------|
| 0 | 4 | SPRED1   |
| 0 | 4 | CD83     |
| 0 | 4 | PLXNC1   |
| 0 | 4 | RIPK2    |
| 0 | 4 | ZSWIM6   |
| 0 | 4 | ITGA5    |
| 0 | 4 | MSR1     |
| 0 | 4 | SLC25A37 |
| 0 | 4 | B4GALT5  |
| 0 | 4 | CXCL16   |
| 0 | 4 | APLP2    |
| 0 | 4 | AGAP3    |
| 0 | 4 | SH3BP5   |
| 0 | 4 | CTNNB1   |
| 0 | 4 | ITGAV    |
| 0 | 4 | IL3RA    |
| 0 | 4 | TEX14    |
| 0 | 4 | SEMA4A   |
| 0 | 4 | PACSIN2  |
| 0 | 4 | FN1      |
| 0 | 4 | SH2B3    |
| 0 | 4 | HIVEP2   |
| 0 | 4 | RAPH1    |
| 0 | 4 | UBASH3B  |
| 0 | 4 | PCSK5    |
| 0 | 4 | NFIL3    |
| 0 | 4 | KCNMA1   |
| 0 | 4 | MAPK6    |
| 0 | 4 | LPXN     |
| 0 | 4 | RNF19B   |
| 0 | 4 | WTAP     |
| 0 | 4 | CD93     |
| 0 | 4 | ZFAND5   |
| 0 | 4 | CDKN1A   |
| 0 | 4 | TIMP2    |
| 0 | 4 | GSTO1    |
| 0 | 4 | PDE4A    |
| 0 | 4 | CFLAR    |
| 0 | 4 | PLCB1    |
| 0 | 4 | ZFAND3   |
| 0 | 4 | PHACTR1  |
| 0 | 4 | TFEC     |
| 0 | 4 | TNFAIP6  |

|   |   |             |
|---|---|-------------|
| 0 | 4 | ACTN1       |
| 0 | 4 | TJP2        |
| 0 | 4 | F13A1       |
| 0 | 4 | MS4A4A      |
| 0 | 4 | SLC44A1     |
| 0 | 4 | RILPL2      |
| 0 | 4 | NFAT5       |
| 0 | 4 | GCH1        |
| 0 | 4 | PIK3AP1     |
| 0 | 4 | INSIG1      |
| 0 | 4 | PALM2-AKAP2 |
| 0 | 4 | MAP2K3      |
| 0 | 4 | PLA2G7      |
| 0 | 4 | CLEC4E      |
| 0 | 4 | IL4I1       |
| 0 | 4 | PDE4B       |
| 0 | 4 | S100A6      |
| 0 | 4 | OXR1        |
| 0 | 4 | ETV6        |
| 0 | 4 | NCOA4       |
| 0 | 4 | ANTXR2      |
| 0 | 4 | LGMN        |
| 0 | 4 | PLD1        |
| 0 | 4 | PDXK        |
| 0 | 4 | RASGRP3     |
| 0 | 4 | NFKBIZ      |
| 0 | 4 | ATP6V1H     |
| 0 | 4 | TPM4        |
| 0 | 4 | RAPGEF1     |
| 0 | 4 | TNFSF13B    |
| 0 | 4 | LATS2       |
| 0 | 4 | OGFRL1      |
| 0 | 4 | TRIO        |
| 0 | 4 | TBC1D8      |
| 0 | 4 | CUL1        |
| 0 | 4 | GAS7        |
| 0 | 4 | UBTD2       |
| 0 | 4 | RNF13       |
| 0 | 4 | STARD13     |
| 0 | 4 | TNFRSF21    |
| 0 | 4 | CORO1C      |
| 0 | 4 | NHSL1       |
| 0 | 4 | CPM         |

|   |   |            |
|---|---|------------|
| 0 | 4 | HLA-DMA    |
| 0 | 4 | CHMP4B     |
| 0 | 4 | AKAP13     |
| 0 | 4 | AP2S1      |
| 0 | 4 | TRAF1      |
| 0 | 4 | CPQ        |
| 0 | 4 | BHLHE40    |
| 0 | 4 | ITSN1      |
| 0 | 4 | TMEM176A   |
| 0 | 4 | CTBP2      |
| 0 | 4 | NECTIN2    |
| 0 | 4 | PLEKHA6    |
| 0 | 4 | ITGB2      |
| 0 | 4 | REL        |
| 0 | 4 | GPNMB      |
| 0 | 4 | IL18       |
| 0 | 4 | COTL1      |
| 0 | 4 | TTYH2      |
| 0 | 4 | PDE4DIP    |
| 0 | 4 | VPS13D     |
| 0 | 4 | AL356124.1 |
| 0 | 4 | CENPU      |
| 0 | 4 | MAP3K20    |
| 0 | 4 | H2AFY      |
| 0 | 4 | NOCT       |
| 0 | 4 | ALOX5      |
| 0 | 4 | NCR3LG1    |
| 0 | 4 | TBC1D12    |
| 0 | 4 | CREG1      |
| 0 | 4 | TANC2      |
| 0 | 4 | SNX8       |
| 0 | 4 | RTN4       |
| 0 | 4 | IL13RA1    |
| 0 | 4 | WDFY3      |
| 0 | 4 | SHB        |
| 0 | 4 | ATP2C1     |
| 0 | 4 | HEXA       |
| 0 | 4 | PRMT9      |
| 0 | 4 | ATP6V1B2   |
| 0 | 4 | PHLDA2     |
| 0 | 4 | DNAH17     |
| 0 | 4 | PKM        |
| 0 | 4 | ZFHX3      |

|   |   |           |
|---|---|-----------|
| 0 | 4 | CD80      |
| 0 | 4 | VSIG4     |
| 0 | 4 | ETV3      |
| 0 | 4 | GNA12     |
| 0 | 4 | PITPNA    |
| 0 | 4 | MYOF      |
| 0 | 4 | VDR       |
| 0 | 4 | FCGR2B    |
| 0 | 4 | GNA15     |
| 0 | 4 | CYFIP1    |
| 0 | 4 | NRIP1     |
| 0 | 4 | LINC00278 |
| 0 | 4 | HLA-DMB   |
| 0 | 4 | CLEC5A    |
| 0 | 4 | MITF      |
| 0 | 4 | MIR3945HG |
| 0 | 4 | GNS       |
| 0 | 4 | ADAM9     |
| 0 | 4 | ARHGAP18  |
| 0 | 4 | YWHAH     |
| 0 | 4 | PHF19     |
| 0 | 4 | LACTB     |
| 0 | 4 | TMEM51    |
| 0 | 4 | HIP1      |
| 0 | 4 | KDM6B     |
| 0 | 4 | PPP1R15B  |
| 0 | 4 | DOCK5     |
| 0 | 4 | ARL5B     |
| 0 | 4 | RAC1      |
| 0 | 4 | ATF6      |
| 0 | 4 | ATP6V1F   |
| 0 | 4 | PEAK1     |
| 0 | 4 | IL10      |
| 0 | 4 | SNTB1     |
| 0 | 4 | PAK1      |
| 0 | 4 | NOTCH2NLC |
| 0 | 4 | LONRF3    |
| 0 | 4 | STK10     |
| 0 | 4 | LAIR1     |
| 0 | 4 | PHACTR4   |
| 0 | 4 | ZNF804A   |
| 0 | 4 | CEP170    |
| 0 | 4 | CSTB      |

|   |   |            |
|---|---|------------|
| 0 | 4 | PDGFC      |
| 0 | 4 | SLC15A3    |
| 0 | 4 | EFHD2      |
| 0 | 4 | RUNX1      |
| 0 | 4 | CTNNA1     |
| 0 | 4 | AL512603.2 |
| 0 | 4 | ST3GAL6    |
| 0 | 4 | GABARAP    |
| 0 | 4 | ZNF710     |
| 0 | 4 | SPRED2     |
| 0 | 4 | KLF10      |
| 0 | 4 | JDP2       |
| 0 | 4 | ZNF516     |
| 0 | 4 | SMIM25     |
| 0 | 4 | GRINA      |
| 0 | 4 | KCNE1      |
| 0 | 4 | ATP6V0B    |
| 0 | 4 | TSC22D2    |
| 0 | 4 | HNRNPC     |
| 0 | 4 | ZFC3H1     |
| 0 | 4 | C9orf72    |
| 0 | 4 | ADM        |
| 0 | 4 | LILRB4     |
| 0 | 4 | RP2        |
| 0 | 4 | MGLL       |
| 0 | 4 | HEXB       |
| 0 | 4 | RTN1       |
| 0 | 4 | ATG7       |
| 0 | 4 | SLC7A7     |
| 0 | 4 | PLAU       |
| 0 | 4 | BAZ1A      |
| 0 | 4 | MCOLN2     |
| 0 | 4 | KCNQ1      |
| 0 | 4 | ARPC5      |
| 0 | 4 | HMOX1      |
| 0 | 4 | NRIP3      |
| 0 | 4 | CCDC138    |
| 0 | 4 | PEA15      |
| 0 | 4 | FAM20C     |
| 0 | 4 | GRASP      |
| 0 | 4 | PTAFR      |
| 0 | 4 | PTPN1      |
| 0 | 4 | LDLR       |

|   |   |            |
|---|---|------------|
| 0 | 4 | ACSL4      |
| 0 | 4 | LILRB2     |
| 0 | 4 | USP12      |
| 0 | 4 | MPP1       |
| 0 | 4 | THEMIS2    |
| 0 | 4 | STK3       |
| 0 | 4 | CLIC2      |
| 0 | 4 | ARHGEF2    |
| 0 | 4 | SUSD6      |
| 0 | 4 | TUBB6      |
| 0 | 4 | PIM3       |
| 0 | 4 | SLCO2B1    |
| 0 | 4 | LINC01471  |
| 0 | 4 | RFX2       |
| 0 | 4 | SLC25A19   |
| 0 | 4 | RCOR1      |
| 0 | 4 | MPEG1      |
| 0 | 4 | RASSF4     |
| 0 | 4 | RASSF5     |
| 0 | 4 | DUSP6      |
| 0 | 4 | YBX3       |
| 0 | 4 | TNFSF13    |
| 0 | 4 | PNRC1      |
| 0 | 4 | PLSCR2     |
| 0 | 4 | PKIB       |
| 0 | 4 | EHD1       |
| 0 | 4 | TNFRSF1B   |
| 0 | 4 | APP        |
| 0 | 4 | CCRL2      |
| 0 | 4 | ATP2B1-AS1 |
| 0 | 4 | SERPINB9   |
| 0 | 4 | PSEN1      |
| 0 | 4 | GPR132     |
| 0 | 4 | VAV2       |
| 0 | 4 | RGL1       |
| 0 | 4 | HOMER1     |
| 0 | 4 | SLC8B1     |
| 0 | 4 | RASSF3     |
| 0 | 4 | ATP1B1     |
| 0 | 4 | ACER3      |
| 0 | 4 | CTNNBL1    |
| 0 | 4 | PRKCE      |
| 0 | 4 | CHMP1B     |

|   |   |             |
|---|---|-------------|
| 0 | 4 | CTSC        |
| 0 | 4 | GBP1        |
| 0 | 4 | MAN2B1      |
| 0 | 4 | SNX10       |
| 0 | 4 | BLVRB       |
| 0 | 4 | UBE2R2      |
| 0 | 4 | SRC         |
| 0 | 4 | PIK3R6      |
| 0 | 4 | CPEB4       |
| 0 | 4 | CD58        |
| 0 | 4 | OSM         |
| 0 | 4 | CANX        |
| 0 | 4 | CD302       |
| 0 | 4 | EIF4E       |
| 0 | 4 | ZC3H12C     |
| 0 | 4 | AP1S2       |
| 0 | 4 | LILRB3      |
| 0 | 4 | PYCARD      |
| 0 | 4 | CLIP2       |
| 0 | 4 | TTYH3       |
| 0 | 4 | XYLT1       |
| 0 | 4 | TLR4        |
| 0 | 4 | VAMP8       |
| 0 | 4 | TRPS1       |
| 0 | 4 | CERS6       |
| 0 | 4 | HK2         |
| 0 | 4 | HNMT        |
| 0 | 4 | C3AR1       |
| 0 | 4 | CD36        |
| 0 | 4 | PDE8A       |
| 0 | 4 | GADD45B     |
| 0 | 4 | IQCJ-SCHIP1 |
| 0 | 4 | AHR         |
| 0 | 4 | AGPAT4      |
| 0 | 4 | KLF7        |
| 0 | 4 | SDCBP       |
| 0 | 4 | CSTA        |
| 0 | 4 | SVIL        |
| 0 | 4 | VASP        |
| 0 | 4 | CYP1B1      |
| 0 | 4 | SOAT1       |
| 0 | 4 | ERI2        |
| 0 | 4 | SLC31A2     |

|   |   |              |
|---|---|--------------|
| 0 | 4 | CPNE8        |
| 0 | 4 | ACP5         |
| 0 | 4 | EPB41L2      |
| 0 | 4 | SEMA3C       |
| 0 | 4 | RAB32        |
| 0 | 4 | TNFRSF10B    |
| 0 | 4 | ADAMTSL4-AS1 |
| 0 | 4 | CHST15       |
| 0 | 4 | DAB2         |
| 0 | 4 | OPN3         |
| 0 | 4 | N4BP1        |
| 0 | 4 | TFDP1        |
| 0 | 4 | CD300A       |
| 0 | 4 | GNA13        |
| 0 | 4 | CLEC12A      |
| 0 | 4 | PLD3         |
| 0 | 4 | SSH1         |
| 0 | 4 | PPM1L        |
| 0 | 4 | PLEKHB2      |
| 0 | 4 | SMIM3        |
| 0 | 4 | STAB1        |
| 0 | 4 | PHLDB1       |
| 0 | 4 | TSPO         |
| 0 | 4 | EPAS1        |
| 0 | 4 | CSF3R        |
| 0 | 4 | RNASE6       |
| 0 | 4 | TXN          |
| 0 | 4 | PPT1         |
| 0 | 4 | NIBAN2       |
| 0 | 4 | DHX34        |
| 0 | 4 | LAP3         |
| 0 | 4 | GTF2IRD1     |
| 0 | 4 | UBE2D1       |
| 0 | 4 | TNIP1        |
| 0 | 4 | PLIN2        |
| 0 | 4 | UBE2E1       |
| 0 | 4 | ARHGAP22     |
| 0 | 4 | ATP6V0D1     |
| 0 | 4 | RAB10        |
| 0 | 4 | LPCAT1       |
| 0 | 4 | PABPC4       |
| 0 | 4 | RHEB         |
| 0 | 4 | IFNGR1       |



|   |   |            |
|---|---|------------|
| 0 | 4 | ARRB2      |
| 0 | 4 | ENG        |
| 0 | 4 | SHTN1      |
| 0 | 4 | PHC2       |
| 0 | 4 | ABHD12     |
| 0 | 4 | PTEN       |
| 0 | 4 | SCUBE2     |
| 0 | 4 | MYO1E      |
| 0 | 4 | EMP1       |
| 0 | 4 | MIR222HG   |
| 0 | 4 | GAS2L3     |
| 0 | 4 | LINC01010  |
| 0 | 4 | NEDD4L     |
| 0 | 4 | METRNL     |
| 0 | 4 | AL138720.1 |
| 0 | 4 | ABTB2      |
| 0 | 4 | GASK1B     |
| 0 | 4 | STK40      |
| 0 | 4 | FAM102B    |
| 0 | 4 | LYN        |
| 0 | 4 | AC126696.1 |
| 0 | 4 | EMP3       |
| 0 | 4 | SNAI1      |
| 0 | 4 | ZNF385A    |
| 0 | 4 | HES1       |
| 0 | 4 | SLC39A11   |
| 0 | 4 | LPCAT2     |
| 0 | 4 | ATP6V1C1   |
| 0 | 4 | BTBD7      |
| 0 | 4 | FHIT       |
| 0 | 4 | EDEM1      |
| 0 | 4 | NQO2       |
| 0 | 4 | MTSS1      |
| 0 | 4 | QSOX1      |
| 0 | 4 | SRGAP2     |
| 0 | 4 | AC106865.2 |
| 0 | 4 | TPP1       |
| 0 | 4 | GPX4       |
| 0 | 4 | ENPP2      |
| 0 | 4 | SLC22A4    |
| 0 | 4 | PNPLA8     |
| 0 | 4 | TP53BP2    |
| 0 | 4 | RAB1A      |

|   |   |            |
|---|---|------------|
| 0 | 4 | ATP6AP1    |
| 0 | 4 | PIK3CB     |
| 0 | 4 | TKT        |
| 0 | 4 | PLEKHG2    |
| 0 | 4 | BTK        |
| 0 | 4 | EIF2AK3    |
| 0 | 4 | SEC24A     |
| 0 | 4 | GNB4       |
| 0 | 4 | IDO2       |
| 0 | 4 | IL1RAP     |
| 0 | 4 | AC090617.5 |
| 0 | 4 | GM2A       |
| 0 | 4 | SIGLEC10   |
| 0 | 4 | GSTP1      |
| 0 | 4 | ELF2       |
| 0 | 4 | DPYSL2     |
| 0 | 4 | RBBP8      |
| 0 | 4 | SAP30      |
| 0 | 4 | SLC25A13   |
| 0 | 4 | GLIPR2     |
| 0 | 4 | AFF4       |
| 0 | 4 | GNAI2      |
| 0 | 4 | CHML       |
| 0 | 4 | ERGIC1     |
| 0 | 4 | CLEC4A     |
| 0 | 4 | TUBB       |
| 0 | 4 | ADA2       |
| 0 | 4 | TMEM165    |
| 0 | 4 | DNAI2      |
| 0 | 4 | IGF2BP2    |
| 0 | 4 | FLNA       |
| 0 | 4 | THAP2      |
| 0 | 4 | SDCCAG8    |
| 0 | 4 | TRPM2      |
| 0 | 4 | CFP        |
| 0 | 4 | PDLIM5     |
| 0 | 4 | PARVB      |
| 0 | 4 | EIF4A1     |
| 0 | 4 | NPTN       |
| 0 | 4 | DENND1A    |
| 0 | 4 | ADAM17     |
| 0 | 4 | LGALS9     |
| 0 | 4 | HAVCR2     |

|   |   |            |
|---|---|------------|
| 0 | 4 | PTTG1IP    |
| 0 | 4 | AF117829.1 |
| 0 | 4 | MAPKAPK2   |
| 0 | 4 | SLC6A6     |
| 0 | 4 | GNB1       |
| 0 | 4 | ZNF438     |
| 0 | 4 | SDC4       |
| 0 | 4 | CPED1      |
| 0 | 4 | CPEB2      |
| 0 | 4 | FCGR1A     |
| 0 | 4 | SLC43A3    |
| 0 | 4 | NOTCH2     |
| 0 | 4 | NFKBIE     |
| 0 | 4 | RREB1      |
| 0 | 4 | PLBD1      |
| 0 | 4 | AVPI1      |
| 0 | 4 | ITGAM      |
| 0 | 4 | NAV1       |
| 0 | 4 | SPINT2     |
| 0 | 4 | SYK        |
| 0 | 4 | MPHOSPH6   |
| 0 | 4 | NRG1       |
| 0 | 4 | HIVEP1     |
| 0 | 4 | GLA        |
| 0 | 4 | SLC16A3    |
| 0 | 4 | DST        |
| 0 | 4 | TBC1D2     |
| 0 | 4 | SMS        |
| 0 | 4 | TMCC3      |
| 0 | 4 | ARHGAP21   |
| 0 | 4 | GRK3       |
| 0 | 4 | LINC00243  |
| 0 | 4 | ZBTB43     |
| 0 | 4 | FRMD4B     |
| 0 | 4 | ERN1       |
| 0 | 4 | ARRB1      |
| 0 | 4 | SGPL1      |
| 0 | 4 | AC135050.3 |
| 0 | 4 | SIAH1      |
| 0 | 4 | CTNND1     |
| 0 | 4 | GPR157     |
| 0 | 4 | ETF1       |
| 0 | 4 | FCAR       |

|   |   |            |
|---|---|------------|
| 0 | 4 | LRP1       |
| 0 | 4 | GSAP       |
| 0 | 4 | LAPTM5     |
| 0 | 4 | SLAMF8     |
| 0 | 4 | OSBPL1A    |
| 0 | 4 | ATOX1      |
| 0 | 4 | LAMP2      |
| 0 | 4 | TMEM163    |
| 0 | 4 | RGS12      |
| 0 | 4 | AC253572.2 |
| 0 | 4 | MFSD12     |
| 0 | 4 | FRY        |
| 0 | 4 | IL15       |
| 0 | 4 | RCAN1      |
| 0 | 4 | GNG10      |
| 0 | 4 | ZNF277     |
| 0 | 4 | NFKBID     |
| 0 | 4 | NR4A2      |
| 0 | 4 | FPR2       |
| 0 | 4 | RAB13      |
| 0 | 4 | ADAP2      |
| 0 | 4 | SERPINB6   |
| 0 | 4 | CLN8       |
| 0 | 4 | CHKA       |
| 0 | 4 | SLC25A44   |
| 0 | 4 | CMTM6      |
| 0 | 4 | CCR5AS     |
| 0 | 4 | TREM2      |
| 0 | 4 | MTHFD1L    |
| 0 | 4 | CCDC200    |
| 0 | 4 | DDX60L     |
| 0 | 4 | USP32      |
| 0 | 4 | CD300LB    |
| 0 | 4 | KIF13A     |
| 0 | 4 | SDSL       |
| 0 | 4 | ZC3H12A    |
| 0 | 4 | TBC1D9     |
| 0 | 4 | P2RX4      |
| 0 | 4 | SLC12A7    |
| 0 | 4 | AMZ1       |
| 0 | 4 | GNG5       |
| 0 | 4 | BCL6       |
| 0 | 4 | YBX1       |

|   |   |            |
|---|---|------------|
| 0 | 4 | FAM20A     |
| 0 | 4 | STXBP2     |
| 0 | 4 | TNFRSF10D  |
| 0 | 4 | RAB7B      |
| 0 | 4 | ACSL5      |
| 0 | 4 | ATF5       |
| 0 | 4 | RGS10      |
| 0 | 4 | YTHDF3     |
| 0 | 4 | SLC16A6    |
| 0 | 4 | SAV1       |
| 0 | 4 | AZIN1      |
| 0 | 4 | PHLPP1     |
| 0 | 4 | AGTPBP1    |
| 0 | 4 | C3         |
| 0 | 4 | RHBDF2     |
| 0 | 4 | LINC00654  |
| 0 | 4 | MAD1L1     |
| 0 | 4 | SERPINB9P1 |
| 0 | 4 | MERTK      |
| 0 | 4 | MEFV       |
| 0 | 4 | PECAM1     |
| 0 | 4 | MMP2-AS1   |
| 0 | 4 | MRAS       |
| 0 | 4 | CDCA4      |
| 0 | 4 | IRF8       |
| 0 | 4 | ATP6AP2    |
| 0 | 4 | SLC41A2    |
| 0 | 4 | BTBD19     |
| 0 | 4 | DOT1L      |
| 0 | 4 | P2RX7      |
| 0 | 4 | ATP6V0C    |
| 0 | 4 | LINC00884  |
| 0 | 4 | GPAT3      |
| 0 | 4 | GPR84      |
| 0 | 4 | KANSL1L    |
| 0 | 4 | ARHGEF10L  |
| 0 | 4 | SQOR       |
| 0 | 4 | SLC37A2    |
| 0 | 4 | TALDO1     |
| 0 | 4 | KIFC3      |
| 0 | 4 | C1orf54    |
| 0 | 4 | PXDC1      |
| 0 | 4 | HRH2       |

|   |   |           |
|---|---|-----------|
| 0 | 4 | IL1R2     |
| 0 | 4 | VASH1     |
| 0 | 4 | FCHO2     |
| 0 | 4 | C2orf92   |
| 0 | 4 | ASTL      |
| 0 | 4 | OAZ2      |
| 0 | 4 | PDE2A     |
| 0 | 4 | SEC24D    |
| 0 | 4 | DNMBP     |
| 0 | 4 | ANKDD1A   |
| 0 | 4 | C19orf38  |
| 0 | 4 | RNH1      |
| 0 | 4 | MDC1      |
| 0 | 4 | SMOX      |
| 0 | 4 | MMP14     |
| 0 | 4 | JAML      |
| 0 | 4 | MFSD2A    |
| 0 | 4 | PLBD2     |
| 0 | 4 | ST14      |
| 0 | 4 | GAA       |
| 0 | 4 | ANKRD22   |
| 0 | 4 | GPATCH2L  |
| 0 | 4 | KCTD20    |
| 0 | 4 | TES       |
| 0 | 4 | LY96      |
| 0 | 4 | PRCP      |
| 0 | 4 | BAIAP2    |
| 0 | 4 | CTTNBP2NL |
| 0 | 4 | SESN2     |
| 0 | 4 | TENT5A    |
| 0 | 4 | TNFRSF1A  |
| 0 | 4 | ALDH1A2   |
| 0 | 4 | RELT      |
| 0 | 4 | SLC11A2   |
| 0 | 4 | LILRA5    |
| 0 | 4 | PLEKHO1   |
| 0 | 4 | TRIM25    |
| 0 | 4 | P4HB      |
| 0 | 4 | SLC66A2   |
| 0 | 4 | NAGK      |
| 0 | 4 | PDGFB     |
| 0 | 4 | CDK14     |
| 0 | 4 | SPHK1     |

|   |   |            |
|---|---|------------|
| 0 | 4 | AC011511.2 |
| 0 | 4 | SPDYA      |
| 0 | 4 | OSCAR      |
| 0 | 4 | SECTM1     |
| 0 | 4 | EAF1       |
| 0 | 4 | NCEH1      |
| 0 | 4 | ANO6       |
| 0 | 4 | PGD        |
| 0 | 4 | RXRA       |
| 0 | 4 | LRRK2      |
| 0 | 4 | PPFIA1     |
| 0 | 4 | ITPRIP     |
| 0 | 4 | OTUD1      |
| 0 | 4 | PGS1       |
| 0 | 4 | PLEKHM2    |
| 0 | 4 | RHOU       |
| 0 | 4 | AHRR       |
| 0 | 4 | AC002091.1 |
| 0 | 4 | TULP2      |
| 0 | 4 | PURB       |
| 0 | 4 | SH3BP2     |
| 0 | 4 | STX4       |
| 0 | 4 | IPMK       |
| 0 | 4 | SRA1       |
| 0 | 4 | KDM7A      |
| 0 | 4 | ARAP1      |
| 0 | 4 | VSIR       |
| 0 | 4 | RUFY3      |
| 0 | 4 | SKAP2      |
| 0 | 4 | CTSA       |
| 0 | 4 | EVI5       |
| 0 | 4 | RRBP1      |
| 0 | 4 | M6PR       |
| 0 | 4 | TBC1D30    |
| 0 | 4 | NEK6       |
| 0 | 4 | SLC2A9     |
| 0 | 4 | ARSB       |
| 0 | 4 | EEPD1      |
| 0 | 4 | LAMP1      |
| 0 | 4 | ACAT2      |
| 0 | 4 | AC139099.2 |
| 0 | 4 | SCARB2     |
| 0 | 4 | IL1R1      |

|   |   |            |
|---|---|------------|
| 0 | 4 | IL10RB     |
| 0 | 4 | LINC00877  |
| 0 | 4 | SERPING1   |
| 0 | 4 | NPL        |
| 0 | 4 | DUSP3      |
| 0 | 4 | RIPOR3     |
| 0 | 4 | IRF2BP2    |
| 0 | 4 | WBP1L      |
| 0 | 4 | FES        |
| 0 | 4 | AKR1A1     |
| 0 | 4 | CNTLN      |
| 0 | 4 | SIPA1L2    |
| 0 | 4 | SLC45A4    |
| 0 | 4 | TBK1       |
| 0 | 4 | SPART      |
| 0 | 4 | CHSY1      |
| 0 | 4 | FHAD1      |
| 0 | 4 | PRPSAP1    |
| 0 | 4 | SLC31A1    |
| 0 | 4 | CAMKK2     |
| 0 | 4 | MOB3A      |
| 0 | 4 | CNDP2      |
| 0 | 4 | SIGLEC9    |
| 0 | 4 | LSS        |
| 0 | 4 | CPPED1     |
| 0 | 4 | DENND3     |
| 0 | 4 | SMCO4      |
| 0 | 4 | AATK       |
| 0 | 4 | LAT2       |
| 0 | 4 | BCL3       |
| 0 | 4 | BAZ2B      |
| 0 | 4 | RNF149     |
| 0 | 4 | ABCC3      |
| 0 | 4 | SPATC1     |
| 0 | 4 | MAP3K13    |
| 0 | 4 | SRGAP2B    |
| 0 | 4 | LACC1      |
| 0 | 4 | CYB5D1     |
| 0 | 4 | COMT       |
| 0 | 4 | ATG3       |
| 0 | 4 | ARID3A     |
| 0 | 4 | SLC8A1-AS1 |
| 0 | 4 | AC013652.1 |



|   |   |            |
|---|---|------------|
| 0 | 4 | AC040970.1 |
| 0 | 4 | LAMTOR2    |
| 0 | 4 | MSRA       |
| 0 | 4 | ZYX        |
| 0 | 4 | CAMSAP2    |
| 0 | 4 | UBAP1      |
| 0 | 4 | ASPH       |
| 0 | 4 | PLEC       |
| 0 | 4 | TBC1D7     |
| 0 | 4 | CD4        |
| 0 | 4 | TMEM273    |
| 0 | 4 | CD40       |
| 0 | 4 | SPECC1     |
| 0 | 4 | HSBP1      |
| 0 | 4 | TRIB1      |
| 0 | 4 | NOD2       |
| 0 | 4 | HES4       |
| 0 | 4 | ADCY3      |
| 0 | 4 | GNB2       |
| 0 | 4 | SSBP3      |
| 0 | 4 | LINC00641  |
| 0 | 4 | CAMK1      |
| 0 | 4 | CASP10     |
| 0 | 4 | NAIP       |
| 0 | 4 | ATP11A     |
| 0 | 4 | ZBTB46     |
| 0 | 4 | PLIN3      |
| 0 | 4 | CD9        |
| 0 | 4 | SAMHD1     |
| 0 | 4 | SLC25A51   |
| 0 | 4 | RBKS       |
| 0 | 4 | LAMB3      |
| 0 | 4 | CCR1       |
| 0 | 4 | MGST2      |
| 0 | 4 | ZFP91      |
| 0 | 4 | AC008771.1 |
| 0 | 4 | CDCP1      |
| 0 | 4 | CASP1      |
| 0 | 4 | ENOSF1     |
| 0 | 4 | KIAA0930   |
| 0 | 4 | AC007952.4 |
| 0 | 4 | TRAPPC5    |
| 0 | 4 | AMPD2      |

|   |   |            |
|---|---|------------|
| 0 | 4 | CLTC       |
| 0 | 4 | RGS18      |
| 0 | 4 | AP000763.3 |
| 0 | 4 | SUSD1      |
| 0 | 4 | SCO2       |
| 0 | 4 | SERPINB8   |
| 0 | 4 | MTF1       |
| 0 | 4 | SLC36A4    |
| 0 | 4 | MIR22HG    |
| 0 | 4 | VPS35      |
| 0 | 4 | OLFML2B    |
| 0 | 4 | NUCB1      |
| 0 | 4 | PLEKHO2    |
| 0 | 4 | NUDT16     |
| 0 | 4 | ADAM8      |
| 0 | 4 | LILRB1     |
| 0 | 4 | TCIRG1     |
| 0 | 4 | ZMIZ1-AS1  |
| 0 | 4 | DISC1      |
| 0 | 4 | MCOLN1     |
| 0 | 4 | CYP2S1     |
| 0 | 4 | CSRNP1     |
| 0 | 4 | ZNFX1      |
| 0 | 4 | HS3ST3B1   |
| 0 | 4 | JAG1       |
| 0 | 4 | CMKLR1     |
| 0 | 4 | SIGLEC12   |
| 0 | 4 | ADCY9      |
| 0 | 4 | BLOC1S6    |
| 0 | 4 | SPG21      |
| 0 | 4 | PRKACA     |
| 0 | 4 | TCN2       |
| 0 | 4 | SPATA5L1   |
| 0 | 4 | LIPA       |
| 0 | 4 | SLC9A8     |
| 0 | 4 | HK1        |
| 0 | 4 | ACOT9      |
| 0 | 4 | PLK3       |
| 0 | 4 | MTHFD2     |
| 0 | 4 | CAPNS1     |
| 0 | 4 | GZF1       |
| 0 | 4 | GCA        |
| 0 | 4 | NFAM1      |

|   |   |             |
|---|---|-------------|
| 0 | 4 | AC090617.10 |
| 0 | 4 | BLVRA       |
| 0 | 4 | ZCCHC14     |
| 0 | 4 | FKBP15      |
| 0 | 4 | PLK2        |
| 0 | 4 | EHD4        |
| 0 | 4 | CRK         |
| 0 | 4 | SERPINF1    |
| 0 | 4 | AP000919.2  |
| 0 | 4 | CEACAM4     |
| 0 | 4 | ODF3B       |
| 0 | 4 | RASSF2      |
| 0 | 4 | CD72        |
| 0 | 4 | MAFG        |
| 0 | 4 | PLAGL1      |
| 0 | 4 | DDAH2       |
| 0 | 4 | TCEAL9      |
| 0 | 4 | NAGA        |
| 0 | 4 | PTPN9       |
| 0 | 4 | CD300LF     |
| 0 | 4 | GAS6        |
| 0 | 4 | LTBR        |
| 0 | 4 | PLA2G6      |
| 0 | 4 | PALLD       |
| 0 | 4 | BCKDK       |
| 0 | 4 | SORT1       |
| 0 | 4 | RRAGD       |
| 0 | 4 | IL17RA      |
| 0 | 4 | GOLIM4      |
| 0 | 4 | ATP6V0A1    |
| 0 | 4 | SNCA        |
| 0 | 4 | TATDN2      |
| 0 | 4 | HGSNAT      |
| 0 | 4 | TET3        |
| 0 | 4 | INSR        |
| 0 | 4 | MIDN        |
| 0 | 4 | 2-Mar       |
| 0 | 4 | COLGALT1    |
| 0 | 4 | RAB34       |
| 0 | 4 | PNP         |
| 0 | 4 | CD33        |
| 0 | 4 | AL355075.4  |
| 0 | 4 | MYO1F       |

|   |   |            |
|---|---|------------|
| 0 | 4 | GRAMD4     |
| 0 | 4 | FMNL3      |
| 0 | 4 | XBP1       |
| 0 | 4 | MTHFR      |
| 0 | 4 | EHBP1L1    |
| 0 | 4 | ITPRID2    |
| 0 | 4 | SCAT1      |
| 0 | 4 | WDR1       |
| 0 | 4 | MYO1G      |
| 0 | 4 | FUOM       |
| 0 | 4 | UQCRC1     |
| 0 | 4 | HEIH       |
| 0 | 4 | MSANTD3    |
| 0 | 4 | NFIC       |
| 0 | 4 | AC090559.1 |
| 0 | 4 | PYGL       |
| 0 | 4 | SCARB1     |
| 0 | 4 | CFLAR-AS1  |
| 0 | 4 | AHCYL1     |
| 0 | 4 | MKNK1      |
| 0 | 4 | VPS37C     |
| 0 | 4 | ALAS1      |
| 0 | 4 | DBNDD2     |
| 0 | 4 | METTL7A    |
| 0 | 4 | UNC93B1    |
| 0 | 4 | STX3       |
| 0 | 4 | FLVCR2     |
| 0 | 4 | FERMT3     |
| 0 | 4 | NANS       |
| 0 | 4 | MBOAT7     |
| 0 | 4 | E2F3       |
| 0 | 4 | NBPF19     |
| 0 | 4 | SLC17A5    |
| 0 | 4 | IL10RB-DT  |
| 0 | 4 | RHOT1      |
| 0 | 4 | SPNS1      |
| 0 | 4 | CYB561A3   |
| 0 | 4 | ARF3       |
| 0 | 4 | RIT1       |
| 0 | 4 | LRRC25     |
| 0 | 4 | APOBR      |
| 0 | 4 | ANXA4      |
| 0 | 4 | FUCA2      |

|   |   |            |
|---|---|------------|
| 0 | 4 | PTGER2     |
| 0 | 4 | C20orf194  |
| 0 | 4 | LGALS3BP   |
| 0 | 4 | CTIF       |
| 0 | 4 | AC104695.2 |
| 0 | 4 | WIFI1      |
| 0 | 4 | CHP1       |
| 0 | 4 | RALB       |
| 0 | 4 | TPD52L2    |
| 0 | 4 | TBC1D10A   |
| 0 | 4 | AC026202.2 |
| 0 | 4 | TICAM1     |
| 0 | 4 | DHRS3      |
| 0 | 4 | NBPF14     |
| 0 | 4 | LINC00847  |
| 0 | 4 | SCPEP1     |
| 0 | 4 | MYD88      |
| 0 | 4 | CSF2RB     |
| 0 | 4 | LINC00963  |
| 0 | 4 | TSPAN4     |
| 0 | 4 | ACADVL     |
| 0 | 4 | CAT        |
| 0 | 4 | VAMP3      |
| 0 | 4 | STX6       |
| 0 | 4 | METTL6     |
| 0 | 4 | PNPLA6     |
| 0 | 4 | TTL        |
| 0 | 4 | ITPK1      |
| 0 | 4 | PLXND1     |
| 0 | 4 | PDLIM7     |
| 0 | 4 | HLA-DOA    |
| 0 | 4 | CDK2AP1    |
| 0 | 4 | SCML1      |
| 0 | 4 | AKR1B1     |
| 0 | 4 | CARM1      |
| 0 | 4 | TWF2       |
| 0 | 4 | NCKAP5L    |
| 0 | 4 | TUBGCP2    |
| 0 | 4 | STARD3NL   |
| 0 | 4 | ABHD2      |
| 0 | 4 | BMP2K      |
| 0 | 4 | ITPRIPL2   |
| 0 | 4 | CDH23      |

|           |   |            |
|-----------|---|------------|
| 0         | 4 | ADAMTSL4   |
| 0         | 4 | EIF4EBP1   |
| 0         | 4 | LY86       |
| 0         | 4 | TLR1       |
| 0         | 4 | MAPKAPK3   |
| 0         | 4 | LMO2       |
| 0         | 4 | PIP5K1C    |
| 0         | 4 | GALNT6     |
| 0         | 4 | TMEM106A   |
| 0         | 4 | PIGA       |
| 0         | 4 | SNX27      |
| 0         | 4 | NAAA       |
| 0         | 4 | PLXNB2     |
| 0         | 4 | NUBP1      |
| 3.41E-303 | 4 | ENO1       |
| 9.07E-303 | 4 | TPRG1      |
| 1.05E-302 | 4 | NAPA       |
| 1.12E-302 | 4 | PGLS       |
| 2.16E-302 | 4 | MPZL1      |
| 2.55E-302 | 4 | PTPRM      |
| 4.14E-302 | 4 | DIAPH2     |
| 5.81E-302 | 4 | TYK2       |
| 2.00E-301 | 4 | ANXA11     |
| 2.01E-300 | 4 | RCC2       |
| 3.66E-300 | 4 | TBC1D14    |
| 6.26E-297 | 4 | TIPARP     |
| 1.18E-296 | 4 | ACTB       |
| 4.61E-296 | 4 | IRS2       |
| 2.45E-295 | 4 | POR        |
| 7.31E-295 | 4 | PDIA3      |
| 5.27E-294 | 4 | IFIH1      |
| 1.67E-293 | 4 | MROH1      |
| 1.68E-293 | 4 | SYNGR2     |
| 2.32E-293 | 4 | ANKS1A     |
| 4.19E-293 | 4 | RHOB       |
| 1.61E-292 | 4 | GRAMD1A    |
| 4.10E-290 | 4 | RNF145     |
| 2.25E-289 | 4 | CSGALNACT2 |
| 3.75E-289 | 4 | TMEM38B    |
| 4.69E-289 | 4 | SLC2A3     |
| 2.56E-288 | 4 | GPD2       |
| 9.95E-288 | 4 | FNDC3A     |
| 1.54E-287 | 4 | UBAC2      |

|           |   |         |
|-----------|---|---------|
| 2.23E-287 | 4 | ZC3H3   |
| 1.63E-286 | 4 | ABHD5   |
| 2.46E-284 | 4 | FKBP1A  |
| 9.33E-284 | 4 | KCNN4   |
| 1.02E-282 | 4 | MED13L  |
| 7.21E-282 | 4 | PDSS1   |
| 8.79E-282 | 4 | GLRX    |
| 1.35E-281 | 4 | REV3L   |
| 1.18E-280 | 4 | TFRC    |
| 2.29E-280 | 4 | TGIF1   |
| 2.41E-280 | 4 | GBE1    |
| 1.16E-279 | 4 | ATP1A1  |
| 2.89E-277 | 4 | CMIP    |
| 3.69E-275 | 4 | SSR1    |
| 3.96E-275 | 4 | IER5    |
| 1.30E-273 | 4 | TPI1    |
| 3.01E-273 | 4 | FNIP1   |
| 6.42E-273 | 4 | POLG2   |
| 8.44E-273 | 4 | TMSB10  |
| 1.62E-272 | 4 | AZI2    |
| 1.98E-272 | 4 | RAB5C   |
| 3.09E-272 | 4 | DHRX    |
| 7.95E-272 | 4 | SUMF1   |
| 8.43E-272 | 4 | CSNK1A1 |
| 1.10E-270 | 4 | YWHAG   |
| 1.50E-270 | 4 | NDRG1   |
| 1.77E-270 | 4 | PTK2B   |
| 2.60E-269 | 4 | BCL2L1  |
| 3.26E-269 | 4 | RDX     |
| 3.04E-268 | 4 | ENTPD1  |
| 8.32E-266 | 4 | ERCC1   |
| 1.46E-263 | 4 | B4GALT1 |
| 4.48E-263 | 4 | ERCC8   |
| 8.23E-263 | 4 | CAP1    |
| 1.83E-262 | 4 | PICALM  |
| 3.16E-262 | 4 | A2M     |
| 5.32E-262 | 4 | ELL2    |
| 1.23E-261 | 4 | LMNA    |
| 5.99E-261 | 4 | SLC2A13 |
| 1.11E-260 | 4 | NABP1   |
| 2.16E-260 | 4 | RBMS1   |
| 2.58E-260 | 4 | MCL1    |
| 5.15E-260 | 4 | RNF24   |

|           |   |            |
|-----------|---|------------|
| 6.52E-260 | 4 | AP2A2      |
| 1.07E-257 | 4 | ADA        |
| 1.26E-257 | 4 | TMEM123    |
| 1.32E-257 | 4 | INTS14     |
| 6.99E-257 | 4 | TPM3       |
| 9.76E-256 | 4 | HIPK3      |
| 1.19E-255 | 4 | PCBP1      |
| 1.83E-255 | 4 | H3F3A      |
| 3.90E-254 | 4 | BRCA2      |
| 4.43E-254 | 4 | HPS5       |
| 9.40E-253 | 4 | GAK        |
| 6.39E-252 | 4 | PSME2      |
| 1.41E-251 | 4 | NT5C2      |
| 1.84E-251 | 4 | LPP        |
| 2.38E-249 | 4 | SLAMF7     |
| 5.13E-249 | 4 | PAPSS1     |
| 6.22E-249 | 4 | N4BP2L1    |
| 6.39E-249 | 4 | RAB21      |
| 3.78E-248 | 4 | FER        |
| 3.81E-248 | 4 | AC020916.1 |
| 1.14E-247 | 4 | NAF1       |
| 4.69E-247 | 4 | ATP2A2     |
| 3.78E-246 | 4 | EXT1       |
| 5.21E-246 | 4 | CAPN2      |
| 1.14E-245 | 4 | STK38L     |
| 2.61E-244 | 4 | HM13       |
| 2.85E-244 | 4 | CAPZB      |
| 1.03E-239 | 4 | PRELID1    |
| 1.23E-239 | 4 | MTMR3      |
| 1.57E-238 | 4 | GDI2       |
| 1.89E-238 | 4 | MRTFA      |
| 1.63E-237 | 4 | TUBA1C     |
| 4.29E-237 | 4 | SNAPC1     |
| 7.49E-237 | 4 | NFATC1     |
| 4.87E-236 | 4 | UBE2W      |
| 6.66E-235 | 4 | DNM2       |
| 1.12E-233 | 4 | NBEAL1     |
| 1.55E-233 | 4 | TXNDC11    |
| 4.01E-233 | 4 | VAPA       |
| 8.60E-232 | 4 | TMEM41B    |
| 1.26E-230 | 4 | PDPK1      |
| 1.83E-230 | 4 | BAG3       |
| 2.58E-228 | 4 | VAV1       |



|           |   |           |
|-----------|---|-----------|
| 4.84E-228 | 4 | HOOK3     |
| 5.62E-227 | 4 | LAMTOR1   |
| 1.79E-226 | 4 | SARNP     |
| 2.48E-226 | 4 | BACH1     |
| 2.87E-226 | 4 | TACC1     |
| 3.04E-226 | 4 | STAT5A    |
| 5.05E-226 | 4 | KCNQ1OT1  |
| 7.07E-226 | 4 | ACTR3     |
| 5.92E-225 | 4 | TSC22D1   |
| 3.77E-223 | 4 | LRRFIP1   |
| 4.54E-223 | 4 | RHOG      |
| 8.09E-223 | 4 | LRRC23    |
| 4.50E-222 | 4 | PHLDA1    |
| 6.91E-222 | 4 | SNX29     |
| 3.12E-220 | 4 | KLHL6     |
| 8.43E-220 | 4 | RALGDS    |
| 1.16E-219 | 4 | IGF2R     |
| 1.50E-218 | 4 | CLEC16A   |
| 5.98E-217 | 4 | STAT1     |
| 7.52E-217 | 4 | GEM       |
| 2.52E-216 | 4 | P4HA1     |
| 4.84E-216 | 4 | MAP4K4    |
| 6.46E-214 | 4 | GPCPD1    |
| 4.69E-213 | 4 | TFDP2     |
| 1.05E-212 | 4 | LINC02245 |
| 2.97E-212 | 4 | RNASEK    |
| 4.58E-212 | 4 | TWISTNB   |
| 4.43E-211 | 4 | ACTR2     |
| 5.49E-211 | 4 | EZH2      |
| 1.63E-210 | 4 | PAFAH1B2  |
| 2.07E-210 | 4 | LCP1      |
| 5.10E-210 | 4 | TRAK1     |
| 6.03E-206 | 4 | RBPJ      |
| 9.14E-206 | 4 | BLOC1S1   |
| 1.14E-205 | 4 | PSMA6     |
| 1.29E-205 | 4 | HLA-DQA2  |
| 3.07E-203 | 4 | SLC7A5    |
| 1.42E-201 | 4 | CYBA      |
| 5.24E-201 | 4 | ARPC1B    |
| 7.25E-200 | 4 | DDB1      |
| 1.48E-198 | 4 | LRRFIP2   |
| 3.68E-198 | 4 | TNFAIP3   |
| 3.97E-198 | 4 | PRNP      |

|           |   |           |
|-----------|---|-----------|
| 3.58E-197 | 4 | MICAL2    |
| 4.42E-197 | 4 | MFSD4B    |
| 1.36E-195 | 4 | ZBTB10    |
| 3.03E-195 | 4 | S100A4    |
| 1.50E-194 | 4 | PRDM1     |
| 1.07E-193 | 4 | KCNAB2    |
| 2.82E-193 | 4 | TMTC2     |
| 4.73E-193 | 4 | IVNS1ABP  |
| 8.05E-193 | 4 | FRMD4A    |
| 2.78E-192 | 4 | HPCAL1    |
| 4.78E-192 | 4 | RGS2      |
| 2.27E-189 | 4 | IPO7      |
| 5.28E-189 | 4 | ZFP36L1   |
| 8.65E-189 | 4 | SRGN      |
| 8.52E-188 | 4 | PPA1      |
| 2.86E-187 | 4 | TNFAIP8   |
| 1.08E-186 | 4 | TTC7A     |
| 1.13E-186 | 4 | CDC37     |
| 3.11E-186 | 4 | UBL3      |
| 3.29E-186 | 4 | ITM2B     |
| 6.87E-184 | 4 | BANP      |
| 6.83E-182 | 4 | ITPR2     |
| 2.72E-181 | 4 | SATB1-AS1 |
| 9.60E-181 | 4 | NDUFAF2   |
| 1.56E-180 | 4 | VAMP5     |
| 4.05E-180 | 4 | UBE2O     |
| 3.00E-179 | 4 | SPATS2L   |
| 2.21E-178 | 4 | TENT4B    |
| 8.03E-178 | 4 | UBE2D3    |
| 4.05E-173 | 4 | TIAM1     |
| 1.82E-172 | 4 | ERC1      |
| 9.59E-172 | 4 | CRADD     |
| 1.14E-171 | 4 | CALR      |
| 1.61E-171 | 4 | SND1      |
| 1.90E-171 | 4 | PSMB3     |
| 1.98E-171 | 4 | NME2      |
| 3.80E-170 | 4 | PPP3R1    |
| 7.55E-170 | 4 | GFOD1     |
| 5.22E-168 | 4 | MALT1     |
| 6.74E-164 | 4 | RHOA      |
| 2.86E-163 | 4 | RNASET2   |
| 6.16E-163 | 4 | ZFY       |
| 3.06E-162 | 4 | DLEU2     |

|           |   |            |
|-----------|---|------------|
| 3.84E-162 | 4 | KPNA4      |
| 3.48E-161 | 4 | VMP1       |
| 5.25E-158 | 4 | HIF1A-AS3  |
| 7.98E-158 | 4 | ANKRD33B   |
| 6.49E-156 | 4 | AC007384.1 |
| 1.48E-155 | 4 | SEPTIN9    |
| 5.81E-155 | 4 | GAPDH      |
| 1.47E-154 | 4 | FBXO11     |
| 5.77E-154 | 4 | MED13      |
| 6.18E-151 | 4 | HLA-DRB5   |
| 2.49E-149 | 4 | DBI        |
| 3.79E-145 | 4 | FBXO34     |
| 1.04E-144 | 4 | SERF2      |
| 1.56E-143 | 4 | SERINC5    |
| 2.28E-143 | 4 | SPSB1      |
| 2.84E-143 | 4 | PHF10      |
| 4.62E-142 | 4 | CD81       |
| 5.80E-140 | 4 | CLTA       |
| 6.55E-139 | 4 | TRAF3      |
| 8.85E-139 | 4 | BTBD11     |
| 3.86E-138 | 4 | AP3B1      |
| 3.27E-137 | 4 | POMP       |
| 4.40E-136 | 4 | TOP1       |
| 1.11E-134 | 4 | CLIC1      |
| 1.72E-134 | 4 | PRDX1      |
| 2.62E-132 | 4 | MYL6       |
| 6.27E-132 | 4 | JMJD1C     |
| 2.15E-130 | 4 | DYNC1H1    |
| 9.21E-129 | 4 | EPG5       |
| 1.50E-126 | 4 | TUBA1B     |
| 4.78E-126 | 4 | RYBP       |
| 1.07E-125 | 4 | ERBIN      |
| 4.43E-125 | 4 | SSBP2      |
| 1.48E-124 | 4 | TLE4       |
| 2.29E-124 | 4 | CYTH1      |
| 1.69E-123 | 4 | UST        |
| 2.86E-123 | 4 | CREBBP     |
| 2.41E-122 | 4 | PSMD5      |
| 1.87E-119 | 4 | PDZD8      |
| 4.66E-119 | 4 | SAMSN1     |
| 4.99E-116 | 4 | AHNAK      |
| 3.36E-113 | 4 | ARPC3      |
| 7.16E-113 | 4 | ECE1       |

|           |   |          |
|-----------|---|----------|
| 5.11E-112 | 4 | GLS      |
| 1.86E-111 | 4 | ROCK1    |
| 2.94E-110 | 4 | AGO2     |
| 2.13E-109 | 4 | EIF4A3   |
| 3.97E-109 | 4 | HDAC9    |
| 7.00E-108 | 4 | SH3BGRL3 |
| 1.13E-105 | 4 | ZHX2     |
| 2.25E-102 | 4 | PFN1     |
| 5.24E-99  | 4 | PELI1    |
| 1.07E-95  | 4 | HNRNPU   |
| 1.24E-94  | 4 | ARPC2    |
| 7.73E-94  | 4 | PPP4R3A  |
| 1.17E-90  | 4 | FOXK2    |
| 3.04E-83  | 4 | CHST11   |
| 4.13E-82  | 4 | CRIM1    |
| 6.43E-79  | 4 | SIK3     |
| 1.48E-73  | 4 | ANKH     |
| 2.19E-68  | 4 | MAP3K2   |
| 2.79E-63  | 4 | ZFX      |
| 3.67E-63  | 4 | STEAP1B  |
| 8.37E-52  | 4 | FOXN3    |
| 0         | 5 | GZMK     |
| 0         | 5 | CCL5     |
| 0         | 5 | GZMA     |
| 0         | 5 | NKG7     |
| 1.86E-290 | 5 | CD8A     |
| 1.04E-286 | 5 | FYN      |
| 1.59E-278 | 5 | CST7     |
| 3.92E-248 | 5 | PARP8    |
| 6.23E-247 | 5 | TC2N     |
| 5.68E-243 | 5 | CD3D     |
| 4.83E-239 | 5 | ANXA1    |
| 2.98E-229 | 5 | GZMM     |
| 1.20E-220 | 5 | CD3G     |
| 6.05E-209 | 5 | IL7R     |
| 6.35E-209 | 5 | CD96     |
| 2.06E-202 | 5 | SYTL3    |
| 2.24E-200 | 5 | CD3E     |
| 2.90E-198 | 5 | LEPROTL1 |
| 1.45E-197 | 5 | CD8B     |
| 5.25E-186 | 5 | KLRK1    |
| 1.84E-184 | 5 | EPHA4    |
| 1.38E-182 | 5 | THEMIS   |

|           |   |         |
|-----------|---|---------|
| 3.18E-181 | 5 | PITPNC1 |
| 1.17E-169 | 5 | CCSER2  |
| 9.82E-169 | 5 | AOAH    |
| 4.62E-168 | 5 | RNF125  |
| 8.22E-164 | 5 | DTHD1   |
| 1.26E-162 | 5 | BCL11B  |
| 2.60E-162 | 5 | PPP2R5C |
| 4.56E-160 | 5 | RUNX3   |
| 1.79E-159 | 5 | CD2     |
| 6.54E-158 | 5 | CCL4    |
| 7.90E-157 | 5 | CBLB    |
| 3.64E-153 | 5 | TRAT1   |
| 1.57E-152 | 5 | PTPRC   |
| 1.62E-151 | 5 | LYAR    |
| 1.36E-150 | 5 | PLAAT4  |
| 2.46E-148 | 5 | B2M     |
| 1.31E-146 | 5 | GPR171  |
| 5.84E-146 | 5 | SAMD3   |
| 6.29E-145 | 5 | TNFAIP3 |
| 1.10E-143 | 5 | ID2     |
| 3.73E-141 | 5 | ABLIM1  |
| 2.46E-139 | 5 | PRKCH   |
| 5.14E-139 | 5 | CALM1   |
| 1.59E-138 | 5 | HCST    |
| 3.89E-138 | 5 | ETS1    |
| 1.06E-135 | 5 | ZFP36L2 |
| 4.14E-135 | 5 | HLA-A   |
| 8.59E-134 | 5 | SYNE2   |
| 7.22E-133 | 5 | RNF19A  |
| 1.40E-131 | 5 | CNOT6L  |
| 4.01E-131 | 5 | IL32    |
| 2.37E-130 | 5 | SRSF7   |
| 8.74E-129 | 5 | CXCR4   |
| 9.31E-126 | 5 | HLA-C   |
| 1.31E-125 | 5 | CD6     |
| 2.15E-124 | 5 | H3F3B   |
| 1.75E-123 | 5 | NIBAN1  |
| 1.17E-121 | 5 | CRTAM   |
| 8.94E-120 | 5 | DUSP2   |
| 7.87E-118 | 5 | ANK3    |
| 3.63E-111 | 5 | PIK3R1  |
| 5.14E-111 | 5 | STAT4   |
| 7.04E-109 | 5 | PIP4K2A |

|           |   |            |
|-----------|---|------------|
| 3.98E-107 | 5 | SCML4      |
| 3.66E-105 | 5 | SARAF      |
| 7.60E-105 | 5 | SLA        |
| 7.02E-102 | 5 | BICDL1     |
| 2.21E-94  | 5 | TGFBR3     |
| 3.77E-94  | 5 | TRBC2      |
| 1.75E-93  | 5 | PDE3B      |
| 9.48E-93  | 5 | SYTL2      |
| 1.33E-92  | 5 | HLA-B      |
| 3.51E-91  | 5 | SLFN12L    |
| 2.54E-89  | 5 | CD99       |
| 3.66E-88  | 5 | RGCC       |
| 3.24E-87  | 5 | SLA2       |
| 5.60E-87  | 5 | SYNE1      |
| 7.43E-87  | 5 | HLA-F      |
| 1.38E-86  | 5 | EMB        |
| 2.27E-86  | 5 | CD44       |
| 2.80E-84  | 5 | RALGAPA1   |
| 3.14E-84  | 5 | TUBA4A     |
| 6.63E-84  | 5 | MLLT3      |
| 3.14E-83  | 5 | NFATC2     |
| 5.98E-83  | 5 | TRAC       |
| 8.47E-83  | 5 | GIMAP7     |
| 1.24E-80  | 5 | ATXN1      |
| 5.78E-80  | 5 | SRGN       |
| 1.69E-79  | 5 | CMC1       |
| 1.76E-79  | 5 | UBE2S      |
| 3.02E-79  | 5 | PPP1R16B   |
| 4.70E-78  | 5 | PDCD4      |
| 2.21E-74  | 5 | AKNA       |
| 1.70E-73  | 5 | KIF21A     |
| 3.21E-73  | 5 | MALAT1     |
| 5.88E-73  | 5 | CRIP1      |
| 1.11E-71  | 5 | AF165147.1 |
| 2.29E-71  | 5 | IKZF1      |
| 9.52E-70  | 5 | FAM177A1   |
| 2.72E-69  | 5 | PLCB1      |
| 3.25E-69  | 5 | PRKCQ      |
| 5.32E-69  | 5 | ITM2B      |
| 6.35E-69  | 5 | ZFYVE28    |
| 1.52E-68  | 5 | CDK17      |
| 3.13E-68  | 5 | HLA-E      |
| 6.18E-68  | 5 | MGAT4A     |

|          |   |            |
|----------|---|------------|
| 1.20E-67 | 5 | LINC01871  |
| 2.92E-66 | 5 | ITM2A      |
| 5.12E-66 | 5 | VIM        |
| 9.92E-66 | 5 | LDHA       |
| 5.09E-64 | 5 | CD7        |
| 1.14E-63 | 5 | GIMAP4     |
| 1.31E-63 | 5 | SLC7A5     |
| 3.78E-63 | 5 | CAMK4      |
| 7.49E-63 | 5 | CDC42SE2   |
| 1.46E-62 | 5 | DDX5       |
| 3.78E-62 | 5 | GZMH       |
| 4.23E-62 | 5 | INPP4B     |
| 1.32E-61 | 5 | S100A10    |
| 4.85E-61 | 5 | MPZL3      |
| 5.04E-60 | 5 | GALM       |
| 9.57E-60 | 5 | BTG1       |
| 1.41E-59 | 5 | MVB12B     |
| 2.73E-59 | 5 | AC044849.1 |
| 4.59E-58 | 5 | PRF1       |
| 7.31E-56 | 5 | CLDND1     |
| 1.62E-54 | 5 | TRBC1      |
| 2.90E-54 | 5 | IQGAP2     |
| 2.12E-53 | 5 | MSN        |
| 2.46E-53 | 5 | SMAD7      |
| 5.19E-53 | 5 | ADGRE5     |
| 6.71E-53 | 5 | APOBEC3G   |
| 1.94E-52 | 5 | TSC22D3    |
| 1.10E-51 | 5 | LIME1      |
| 1.51E-50 | 5 | DDX24      |
| 1.89E-50 | 5 | MYH9       |
| 2.08E-50 | 5 | CALM2      |
| 3.40E-48 | 5 | ITK        |
| 7.43E-48 | 5 | ARL4C      |
| 2.71E-47 | 5 | EVL        |
| 4.56E-47 | 5 | RSRP1      |
| 5.03E-45 | 5 | PBX4       |
| 5.82E-44 | 5 | SKAP1      |
| 1.52E-43 | 5 | CD69       |
| 2.99E-41 | 5 | TSPYL2     |
| 1.34E-39 | 5 | CLEC2B     |
| 1.54E-39 | 5 | AAK1       |
| 2.16E-39 | 5 | PYHIN1     |
| 1.26E-38 | 5 | RNF213     |

|          |   |            |
|----------|---|------------|
| 2.04E-38 | 5 | RASA3      |
| 4.08E-38 | 5 | SH3BGRL3   |
| 5.10E-37 | 5 | GNG2       |
| 1.53E-36 | 5 | CEMIP2     |
| 1.25E-35 | 5 | ATP8A1     |
| 1.59E-35 | 5 | KLF12      |
| 2.69E-35 | 5 | RABGAP1L   |
| 2.87E-35 | 5 | BTN3A1     |
| 2.95E-35 | 5 | SLC38A2    |
| 6.16E-35 | 5 | ZBTB20     |
| 7.83E-35 | 5 | AKT3       |
| 2.00E-34 | 5 | PCED1B-AS1 |
| 2.19E-34 | 5 | LCK        |
| 2.21E-34 | 5 | SRSF5      |
| 2.91E-34 | 5 | PAXX       |
| 1.68E-33 | 5 | CRYBG1     |
| 2.24E-33 | 5 | EIF1       |
| 1.24E-32 | 5 | OXNAD1     |
| 1.78E-32 | 5 | ZBED4      |
| 2.08E-32 | 5 | BTN3A2     |
| 1.05E-31 | 5 | STAT5B     |
| 1.22E-31 | 5 | WNK1       |
| 1.34E-31 | 5 | FAM102A    |
| 1.87E-31 | 5 | KIF13B     |
| 9.06E-31 | 5 | TUBB4B     |
| 2.03E-30 | 5 | GTDC1      |
| 8.18E-30 | 5 | MPP7       |
| 1.10E-29 | 5 | ACAP1      |
| 2.89E-29 | 5 | SRSF2      |
| 2.92E-29 | 5 | UBB        |
| 3.35E-29 | 5 | AC068587.4 |
| 5.91E-29 | 5 | TRERF1     |
| 1.17E-28 | 5 | TGFB1      |
| 1.42E-28 | 5 | TXNIP      |
| 3.87E-28 | 5 | STK17A     |
| 4.45E-28 | 5 | FUS        |
| 4.88E-28 | 5 | SFMBT2     |
| 9.88E-28 | 5 | SPOCK2     |
| 1.18E-27 | 5 | PPP1R10    |
| 1.24E-27 | 5 | JMJD6      |
| 1.83E-27 | 5 | SLC38A1    |
| 2.74E-27 | 5 | IER5L      |
| 3.47E-27 | 5 | SH2D1A     |



|          |   |           |
|----------|---|-----------|
| 1.20E-26 | 5 | GALNT11   |
| 1.65E-26 | 5 | MYLIP     |
| 3.19E-26 | 5 | IDS       |
| 8.55E-26 | 5 | ERN1      |
| 9.26E-25 | 5 | ATP2B4    |
| 1.08E-24 | 5 | MYL12B    |
| 1.43E-24 | 5 | ZNF831    |
| 2.85E-24 | 5 | ISG20     |
| 3.03E-24 | 5 | PCNX2     |
| 5.26E-24 | 5 | HNRNPLL   |
| 6.72E-24 | 5 | TUBA1A    |
| 6.89E-24 | 5 | PPP1R2    |
| 1.10E-23 | 5 | LINC00513 |
| 1.69E-23 | 5 | KLF6      |
| 1.88E-23 | 5 | GUK1      |
| 2.54E-23 | 5 | TOB1      |
| 3.46E-23 | 5 | MYADM     |
| 2.23E-22 | 5 | NDUFS5    |
| 3.18E-22 | 5 | TG        |
| 3.67E-22 | 5 | SLFN5     |
| 7.16E-22 | 5 | CDC42EP3  |
| 9.20E-22 | 5 | SPTAN1    |
| 1.35E-21 | 5 | CCNH      |
| 1.47E-21 | 5 | LMNA      |
| 1.80E-21 | 5 | NASP      |
| 1.10E-20 | 5 | PRKX      |
| 1.32E-20 | 5 | PSME1     |
| 1.32E-20 | 5 | HIST2H2AC |
| 2.25E-20 | 5 | RESF1     |
| 9.08E-20 | 5 | NAA50     |
| 9.32E-20 | 5 | ABHD17A   |
| 1.90E-19 | 5 | STOM      |
| 6.19E-19 | 5 | CORO7     |
| 1.19E-18 | 5 | RNF115    |
| 1.74E-18 | 5 | EIF4A2    |
| 4.07E-18 | 5 | PLP2      |
| 1.32E-17 | 5 | SRSF3     |
| 1.92E-17 | 5 | TBC1D2B   |
| 3.00E-17 | 5 | NDFIP1    |
| 4.37E-17 | 5 | SOD1      |
| 4.71E-17 | 5 | SOCS1     |
| 6.33E-17 | 5 | CMIP      |
| 1.20E-16 | 5 | DIP2A     |

|          |   |           |
|----------|---|-----------|
| 1.42E-16 | 5 | CDC14A    |
| 1.65E-16 | 5 | SERTAD1   |
| 1.74E-16 | 5 | HIST1H4C  |
| 2.33E-16 | 5 | SAP18     |
| 5.58E-16 | 5 | SUPT3H    |
| 1.15E-15 | 5 | HERPUD2   |
| 2.73E-15 | 5 | AUTS2     |
| 3.08E-15 | 5 | MCUB      |
| 3.34E-15 | 5 | KLF13     |
| 4.05E-15 | 5 | OCIAD2    |
| 5.70E-15 | 5 | DDX3X     |
| 1.01E-14 | 5 | PIK3IP1   |
| 1.05E-14 | 5 | DUSP4     |
| 1.23E-14 | 5 | SKP1      |
| 1.94E-14 | 5 | NEU1      |
| 2.00E-14 | 5 | BIN2      |
| 2.89E-14 | 5 | JAML      |
| 2.93E-14 | 5 | LINC01619 |
| 3.57E-14 | 5 | RAB27A    |
| 4.02E-14 | 5 | ARAP2     |
| 4.42E-14 | 5 | OAT       |
| 5.80E-14 | 5 | EIF5      |
| 7.75E-14 | 5 | GSPT1     |
| 8.63E-14 | 5 | LINC01934 |
| 1.48E-13 | 5 | TGFBR2    |
| 1.62E-13 | 5 | CASP8     |
| 2.80E-13 | 5 | PPP2R5A   |
| 4.59E-13 | 5 | H2AFX     |
| 6.11E-13 | 5 | ANKRD13D  |
| 6.31E-13 | 5 | MAPRE2    |
| 8.61E-13 | 5 | PGK1      |
| 1.41E-12 | 5 | LRRC8C    |
| 1.42E-12 | 5 | TMEM50A   |
| 1.49E-12 | 5 | PMEPA1    |
| 2.21E-12 | 5 | S1PR4     |
| 2.65E-12 | 5 | LYST      |
| 6.13E-12 | 5 | NCALD     |
| 8.01E-12 | 5 | BRD1      |
| 1.06E-11 | 5 | LBH       |
| 1.07E-11 | 5 | DOCK8     |
| 2.97E-11 | 5 | SUN2      |
| 3.90E-11 | 5 | LY6E      |
| 8.99E-11 | 5 | LPIN2     |

|          |   |            |
|----------|---|------------|
| 1.19E-10 | 5 | ITGA4      |
| 1.97E-10 | 5 | INTS6      |
| 2.57E-10 | 5 | POLR2A     |
| 5.06E-10 | 5 | TMEM181    |
| 5.68E-10 | 5 | PSMB9      |
| 8.96E-10 | 5 | HMGB2      |
| 1.47E-09 | 5 | PTP4A2     |
| 1.51E-09 | 5 | TCF7       |
| 2.78E-09 | 5 | ARHGEF3    |
| 5.78E-09 | 5 | TERF2IP    |
| 8.92E-09 | 5 | CIB1       |
| 1.01E-08 | 5 | AL627171.2 |
| 1.19E-08 | 5 | SIRT2      |
| 1.19E-08 | 5 | OPTN       |
| 1.85E-08 | 5 | H2AFZ      |
| 3.05E-08 | 5 | RASAL3     |
| 6.91E-08 | 5 | P2RY8      |
| 9.36E-08 | 5 | IKZF3      |
| 1.04E-07 | 5 | PATJ       |
| 1.46E-07 | 5 | EIF4A3     |
| 1.52E-07 | 5 | PTPN4      |
| 1.82E-07 | 5 | PRMT2      |
| 2.65E-07 | 5 | MAML2      |
| 4.15E-07 | 5 | RCAN3      |
| 5.46E-07 | 5 | AHNAK      |
| 5.90E-07 | 5 | C12orf57   |
| 6.15E-07 | 5 | ATXN7      |
| 6.65E-07 | 5 | GABARAPL1  |
| 8.27E-07 | 5 | MACF1      |
| 8.54E-07 | 5 | WAKMAR2    |
| 1.02E-06 | 5 | TUBA1C     |
| 1.65E-06 | 5 | METRNL     |
| 2.11E-06 | 5 | ODC1       |
| 2.19E-06 | 5 | ARHGEF1    |
| 3.22E-06 | 5 | C5orf56    |
| 3.35E-06 | 5 | BRD2       |
| 3.40E-06 | 5 | CITED2     |
| 3.56E-06 | 5 | PTPN7      |
| 3.75E-06 | 5 | ITGAL      |
| 5.63E-06 | 5 | KANSL1     |
| 8.41E-06 | 5 | TECR       |
| 1.18E-05 | 5 | CKLF       |
| 1.27E-05 | 5 | HECA       |

|             |   |          |
|-------------|---|----------|
| 5.09E-05    | 5 | RASGRP1  |
| 5.94E-05    | 5 | NUFIP2   |
| 6.25E-05    | 5 | RIPK1    |
| 0.000101541 | 5 | SEMA4D   |
| 0.000125201 | 5 | MACO1    |
| 0.000132172 | 5 | H1FX     |
| 0.000173463 | 5 | RASA1    |
| 0.000174997 | 5 | CCDC85B  |
| 0.000200627 | 5 | NFE2L3   |
| 0.000313083 | 5 | ENSA     |
| 0.000343993 | 5 | ODF2L    |
| 0.000507962 | 5 | PPP1R14B |
| 0.000824759 | 5 | PPDPF    |
| 0.000858941 | 5 | AMD1     |
| 0.00122328  | 5 | ITGAE    |
| 0.001639382 | 5 | SNHG12   |
| 0.002033505 | 5 | EIF1AX   |
| 0.002590521 | 5 | XPC      |
| 0.002733831 | 5 | TLE4     |
| 0.002772269 | 5 | ORAI1    |
| 0.006703684 | 5 | ATP1A1   |
| 0.007253839 | 5 | DYNLL1   |
| 0.007672384 | 5 | PER1     |
| 0.010365878 | 5 | ARHGEF7  |
| 0.010425957 | 5 | NKTR     |
| 0.013834615 | 5 | SNRK     |
| 0.013955233 | 5 | SLC25A26 |
| 0.014634655 | 5 | HNRNPUL1 |
| 0.016108947 | 5 | PCED1B   |
| 0.023734164 | 5 | SKI      |
| 0.026734926 | 5 | GPR65    |
| 0.030209136 | 5 | GCC2     |
| 0.035506738 | 5 | BTD      |
| 0.050945571 | 5 | KIF2A    |
| 0.0627315   | 5 | GLUD1    |
| 0.089269302 | 5 | RNF38    |
| 0.223066811 | 5 | NCOA1    |
| 0.231386064 | 5 | SLC4A7   |
| 0.271062278 | 5 | TAF7     |
| 0.280903451 | 5 | NLRC5    |
| 0.443212122 | 5 | HMOX2    |
| 0.451760057 | 5 | IFNGR1   |
| 0.476462539 | 5 | SMURF2   |

|             |   |            |
|-------------|---|------------|
| 0.483171169 | 5 | HEXIM1     |
| 0.561652962 | 5 | GGA2       |
| 0.847208557 | 5 | DHRS7      |
| 1           | 5 | REEP5      |
| 1           | 5 | RBL2       |
| 1           | 5 | TENT5C     |
| 1           | 5 | CCDC97     |
| 1           | 5 | GSTK1      |
| 1           | 5 | TBC1D10C   |
| 1           | 5 | TARSL2     |
| 1           | 5 | SURF4      |
| 1           | 5 | SENP7      |
| 1           | 5 | HNRNPH1    |
| 1           | 5 | URI1       |
| 1           | 5 | NSMCE3     |
| 1           | 5 | GALNT10    |
| 1           | 5 | PITHD1     |
| 1           | 5 | SMARCA5    |
| 1           | 5 | ARHGAP9    |
| 1           | 5 | PRKAR2A    |
| 1           | 5 | AC020916.1 |
| 1           | 5 | DYNLT1     |
| 1           | 5 | VCP        |
| 1           | 5 | EVI2A      |
| 1           | 5 | DOK2       |
| 1           | 5 | GADD45B    |
| 1           | 5 | C9orf78    |
| 1           | 5 | MAN2A1     |
| 1           | 5 | AC245297.3 |
| 1           | 5 | PDCL3      |
| 1           | 5 | PRKACB     |
| 1           | 5 | XPO4       |
| 0           | 6 | IGLC2      |
| 0           | 6 | IGKC       |
| 0           | 6 | IGHG1      |
| 0           | 6 | IGLC3      |
| 0           | 6 | IGLC1      |
| 0           | 6 | IGHG3      |
| 0           | 6 | IGHA1      |
| 0           | 6 | IGHG4      |
| 0           | 6 | IGHGP      |
| 0           | 6 | IGHG2      |
| 0           | 6 | JCHAIN     |

|   |   |            |
|---|---|------------|
| 0 | 6 | MZB1       |
| 0 | 6 | SSR4       |
| 0 | 6 | DERL3      |
| 0 | 6 | XBP1       |
| 0 | 6 | TXNDC5     |
| 0 | 6 | FKBP11     |
| 0 | 6 | PRDX4      |
| 0 | 6 | COBLL1     |
| 0 | 6 | SEC11C     |
| 0 | 6 | IFNG-AS1   |
| 0 | 6 | ST6GAL1    |
| 0 | 6 | JSRP1      |
| 0 | 6 | CD38       |
| 0 | 6 | GAB1       |
| 0 | 6 | CREB3L2    |
| 0 | 6 | AC008014.1 |
| 0 | 6 | MYO1D      |
| 0 | 6 | RRBP1      |
| 0 | 6 | CROCC      |
| 0 | 6 | IGLV3-1    |
| 0 | 6 | LINC02384  |
| 0 | 6 | CFAP54     |
| 0 | 6 | ACOXL      |
| 0 | 6 | AC007569.1 |
| 0 | 6 | ESR1       |
| 0 | 6 | ITM2C      |
| 0 | 6 | POU2AF1    |
| 0 | 6 | DENND5B    |
| 0 | 6 | SPATS2     |
| 0 | 6 | LINC02362  |
| 0 | 6 | CLIC4      |
| 0 | 6 | FCRL5      |
| 0 | 6 | SELENOS    |
| 0 | 6 | BLNK       |
| 0 | 6 | SSR3       |
| 0 | 6 | SOX5       |
| 0 | 6 | EIF2AK4    |
| 0 | 6 | BCAR3      |
| 0 | 6 | PDK1       |
| 0 | 6 | HIST1H2BJ  |
| 0 | 6 | SEL1L      |
| 0 | 6 | TBC1D9     |
| 0 | 6 | ZNF215     |

|   |   |            |
|---|---|------------|
| 0 | 6 | LRRK1      |
| 0 | 6 | SLC44A1    |
| 0 | 6 | RASSF6     |
| 0 | 6 | ZBP1       |
| 0 | 6 | SLAMF7     |
| 0 | 6 | TNFRSF17   |
| 0 | 6 | HIST1H2BD  |
| 0 | 6 | SEC24D     |
| 0 | 6 | GNG7       |
| 0 | 6 | AL591518.1 |
| 0 | 6 | SDF2L1     |
| 0 | 6 | AC007952.4 |
| 0 | 6 | ERLEC1     |
| 0 | 6 | SSPN       |
| 0 | 6 | LMAN1      |
| 0 | 6 | AC012236.1 |
| 0 | 6 | RHEX       |
| 0 | 6 | CD79A      |
| 0 | 6 | TRIB1      |
| 0 | 6 | SPAG4      |
| 0 | 6 | HIST1H2BC  |
| 0 | 6 | KCNN3      |
| 0 | 6 | MEI1       |
| 0 | 6 | BHLHE41    |
| 0 | 6 | GAS6       |
| 0 | 6 | NUCB2      |
| 0 | 6 | CHST15     |
| 0 | 6 | U62317.4   |
| 0 | 6 | TRAM2      |
| 0 | 6 | SDC1       |
| 0 | 6 | CPNE5      |
| 0 | 6 | PLPP5      |
| 0 | 6 | Z93930.2   |
| 0 | 6 | C11orf80   |
| 0 | 6 | AC078883.1 |
| 0 | 6 | P2RX1      |
| 0 | 6 | MANEA      |
| 0 | 6 | NUGGC      |
| 0 | 6 | ST6GALNAC4 |
| 0 | 6 | MEF2B      |
| 0 | 6 | SRPRB      |
| 0 | 6 | CHST2      |
| 0 | 6 | PGM3       |

|           |   |            |
|-----------|---|------------|
| 0         | 6 | CHPF       |
| 0         | 6 | ARSA       |
| 1.35E-300 | 6 | SELENOM    |
| 1.16E-298 | 6 | CEP128     |
| 2.05E-288 | 6 | PIP5K1B    |
| 6.44E-287 | 6 | MANF       |
| 5.68E-282 | 6 | TPD52      |
| 9.24E-276 | 6 | CRELD2     |
| 5.10E-274 | 6 | ITGA6      |
| 4.49E-271 | 6 | SPCS2      |
| 3.86E-266 | 6 | PLCG2      |
| 1.13E-264 | 6 | RALGPS2    |
| 8.15E-263 | 6 | CASP10     |
| 4.97E-260 | 6 | LARGE1     |
| 4.11E-259 | 6 | TXNDC15    |
| 9.72E-256 | 6 | AL021155.5 |
| 3.27E-253 | 6 | HM13       |
| 5.14E-249 | 6 | AC016074.2 |
| 6.04E-248 | 6 | MEF2C      |
| 7.38E-246 | 6 | SIL1       |
| 1.07E-245 | 6 | HIST1H2AC  |
| 1.11E-245 | 6 | PIK3CG     |
| 9.02E-242 | 6 | IGHA2      |
| 7.63E-241 | 6 | INSR       |
| 1.64E-235 | 6 | ANKRD28    |
| 5.92E-235 | 6 | CLPTM1L    |
| 8.57E-231 | 6 | RAB30      |
| 7.73E-229 | 6 | FNDC3B     |
| 1.06E-225 | 6 | TEX14      |
| 6.93E-225 | 6 | SEC61A1    |
| 7.48E-225 | 6 | LARP1B     |
| 1.58E-223 | 6 | Z93241.1   |
| 2.82E-220 | 6 | TP53INP1   |
| 6.40E-220 | 6 | PDIA4      |
| 3.37E-218 | 6 | EVI5       |
| 8.19E-213 | 6 | TMEM107    |
| 1.38E-200 | 6 | TXNDC11    |
| 1.24E-198 | 6 | MYDGF      |
| 2.57E-195 | 6 | AL162253.2 |
| 1.15E-187 | 6 | SPCS3      |
| 1.52E-186 | 6 | HDLBP      |
| 8.52E-186 | 6 | VOPP1      |
| 2.36E-185 | 6 | HERPUD1    |



|           |   |            |
|-----------|---|------------|
| 2.29E-182 | 6 | HSH2D      |
| 2.64E-181 | 6 | HIST1H1C   |
| 3.02E-180 | 6 | TBCEL      |
| 1.99E-174 | 6 | STAP1      |
| 2.84E-172 | 6 | SEL1L3     |
| 5.18E-170 | 6 | TOR3A      |
| 4.70E-168 | 6 | THEMIS2    |
| 1.88E-164 | 6 | EIF2AK3    |
| 1.25E-163 | 6 | TSPAN13    |
| 8.14E-163 | 6 | CPEB4      |
| 2.43E-160 | 6 | UBE2J1     |
| 3.55E-160 | 6 | PRPSAP2    |
| 5.63E-160 | 6 | KDEL2      |
| 7.30E-160 | 6 | CARMIL1    |
| 3.83E-153 | 6 | CCDC88A    |
| 1.42E-152 | 6 | OSBPL10    |
| 5.02E-151 | 6 | CDK14      |
| 1.50E-150 | 6 | GALNT2     |
| 6.21E-146 | 6 | KDEL1      |
| 3.79E-143 | 6 | HMCES      |
| 2.05E-142 | 6 | SEC24A     |
| 1.85E-135 | 6 | AC012447.1 |
| 1.86E-129 | 6 | PECAM1     |
| 1.50E-126 | 6 | PIM2       |
| 1.46E-124 | 6 | TRIO       |
| 6.30E-123 | 6 | DAP        |
| 6.98E-120 | 6 | FBH1       |
| 7.30E-115 | 6 | HIPK2      |
| 7.15E-114 | 6 | DENND1B    |
| 6.75E-113 | 6 | TVP23C     |
| 1.16E-111 | 6 | FHIT       |
| 4.31E-109 | 6 | RABAC1     |
| 2.40E-105 | 6 | BTD        |
| 3.21E-103 | 6 | PAPSS1     |
| 6.48E-97  | 6 | GMDS-DT    |
| 7.83E-94  | 6 | TRAM1      |
| 1.51E-93  | 6 | FNDC3A     |
| 1.50E-90  | 6 | USP48      |
| 2.70E-90  | 6 | RPN2       |
| 2.12E-88  | 6 | PDIA6      |
| 2.89E-83  | 6 | BICD1      |
| 1.42E-81  | 6 | SPCS1      |
| 3.44E-76  | 6 | TENT5C     |

|          |   |           |
|----------|---|-----------|
| 1.39E-73 | 6 | EHMT1     |
| 5.27E-73 | 6 | OSBPL3    |
| 7.21E-71 | 6 | DUSP5     |
| 7.88E-71 | 6 | CDK6      |
| 5.91E-68 | 6 | XIST      |
| 1.16E-63 | 6 | IGHM      |
| 1.11E-62 | 6 | CYBA      |
| 4.03E-61 | 6 | SEC61B    |
| 1.18E-60 | 6 | ERN1      |
| 2.70E-59 | 6 | PRDM1     |
| 8.60E-59 | 6 | KRTCAP2   |
| 4.50E-54 | 6 | NDUFAF6   |
| 1.58E-52 | 6 | RHBDD1    |
| 1.23E-49 | 6 | H1FX      |
| 1.56E-44 | 6 | WWOX      |
| 6.69E-43 | 6 | BCL2L11   |
| 1.62E-42 | 6 | LINC00910 |
| 1.83E-42 | 6 | EDEM1     |
| 3.54E-42 | 6 | FCHSD2    |
| 4.17E-38 | 6 | SND1      |
| 5.06E-38 | 6 | FBXW7     |
| 2.34E-36 | 6 | FAM214A   |
| 3.80E-34 | 6 | FUT8      |
| 7.71E-28 | 6 | CYTOR     |
| 5.96E-27 | 6 | MAN1A1    |
| 2.04E-21 | 6 | MDM2      |
| 1.46E-15 | 6 | WDR74     |
| 1.69E-07 | 6 | RAPGEF1   |
| 9.07E-07 | 6 | NCOA3     |
| 1        | 6 | SQSTM1    |
| 1        | 6 | ITPR2     |
| 0        | 7 | APOE      |
| 0        | 7 | SPP1      |
| 0        | 7 | C1QA      |
| 0        | 7 | C1QB      |
| 0        | 7 | CCL18     |
| 0        | 7 | MMP12     |
| 0        | 7 | APOC1     |
| 0        | 7 | C1QC      |
| 0        | 7 | RNASE1    |
| 0        | 7 | FTL       |
| 0        | 7 | CTSB      |
| 0        | 7 | LYZ       |

|   |   |          |
|---|---|----------|
| 0 | 7 | CD14     |
| 0 | 7 | IFI30    |
| 0 | 7 | CTSZ     |
| 0 | 7 | TYROBP   |
| 0 | 7 | AIF1     |
| 0 | 7 | CST3     |
| 0 | 7 | PSAP     |
| 0 | 7 | CD68     |
| 0 | 7 | MRC1     |
| 0 | 7 | FCER1G   |
| 0 | 7 | SELENOP  |
| 0 | 7 | FCGR2A   |
| 0 | 7 | MS4A6A   |
| 0 | 7 | CTSL     |
| 0 | 7 | GLUL     |
| 0 | 7 | MAFB     |
| 0 | 7 | FMNL2    |
| 0 | 7 | TMEM176B |
| 0 | 7 | GRN      |
| 0 | 7 | GPNMB    |
| 0 | 7 | FCGR3A   |
| 0 | 7 | LRMDA    |
| 0 | 7 | PLXDC2   |
| 0 | 7 | LGMN     |
| 0 | 7 | MS4A7    |
| 0 | 7 | CD163    |
| 0 | 7 | SLC16A10 |
| 0 | 7 | FCGRT    |
| 0 | 7 | F13A1    |
| 0 | 7 | IGSF6    |
| 0 | 7 | NPC2     |
| 0 | 7 | FMN1     |
| 0 | 7 | MSR1     |
| 0 | 7 | HLA-DRA  |
| 0 | 7 | HLA-DRB1 |
| 0 | 7 | CD74     |
| 0 | 7 | CAPG     |
| 0 | 7 | HLA-DPA1 |
| 0 | 7 | DAB2     |
| 0 | 7 | RAB31    |
| 0 | 7 | PLD3     |
| 0 | 7 | SLC40A1  |
| 0 | 7 | CTSS     |

|   |   |          |
|---|---|----------|
| 0 | 7 | MARCKS   |
| 0 | 7 | MS4A4A   |
| 0 | 7 | PAPSS2   |
| 0 | 7 | CYBB     |
| 0 | 7 | TGFBI    |
| 0 | 7 | CXCL3    |
| 0 | 7 | SLCO2B1  |
| 0 | 7 | PMP22    |
| 0 | 7 | SLC8A1   |
| 0 | 7 | PLA2G7   |
| 0 | 7 | HMOX1    |
| 0 | 7 | TIMP2    |
| 0 | 7 | FGL2     |
| 0 | 7 | RBM47    |
| 0 | 7 | KCNMA1   |
| 0 | 7 | NRP1     |
| 0 | 7 | PLTP     |
| 0 | 7 | ABCA1    |
| 0 | 7 | CREG1    |
| 0 | 7 | TMEM176A |
| 0 | 7 | FOLR2    |
| 0 | 7 | IFITM3   |
| 0 | 7 | HLA-DPB1 |
| 0 | 7 | MERTK    |
| 0 | 7 | DOCK4    |
| 0 | 7 | CTSH     |
| 0 | 7 | KCTD12   |
| 0 | 7 | MFSD1    |
| 0 | 7 | ASAH1    |
| 0 | 7 | CXCL2    |
| 0 | 7 | TNS3     |
| 0 | 7 | GSN      |
| 0 | 7 | C5AR1    |
| 0 | 7 | FPR3     |
| 0 | 7 | HLA-DQB1 |
| 0 | 7 | CSF1R    |
| 0 | 7 | TREM2    |
| 0 | 7 | CXCL8    |
| 0 | 7 | SLC1A3   |
| 0 | 7 | SH3PXD2B |
| 0 | 7 | DAPK1    |
| 0 | 7 | PDGFC    |
| 0 | 7 | CALHM6   |

|   |   |          |
|---|---|----------|
| 0 | 7 | SPI1     |
| 0 | 7 | STAB1    |
| 0 | 7 | FRMD4A   |
| 0 | 7 | LHFPL2   |
| 0 | 7 | VSIG4    |
| 0 | 7 | SPRED1   |
| 0 | 7 | SDS      |
| 0 | 7 | CD86     |
| 0 | 7 | MITF     |
| 0 | 7 | LNCAROD  |
| 0 | 7 | HBEGF    |
| 0 | 7 | NUPR1    |
| 0 | 7 | LST1     |
| 0 | 7 | CPVL     |
| 0 | 7 | RASAL2   |
| 0 | 7 | TFEC     |
| 0 | 7 | MNDA     |
| 0 | 7 | DMXL2    |
| 0 | 7 | HLA-DMB  |
| 0 | 7 | C15orf48 |
| 0 | 7 | CXCL16   |
| 0 | 7 | TMEM163  |
| 0 | 7 | C3AR1    |
| 0 | 7 | FCHO2    |
| 0 | 7 | C1orf54  |
| 0 | 7 | HNMT     |
| 0 | 7 | PSD3     |
| 0 | 7 | CLEC7A   |
| 0 | 7 | LILRB4   |
| 0 | 7 | TNFSF13  |
| 0 | 7 | FNIP2    |
| 0 | 7 | CPM      |
| 0 | 7 | ADAP2    |
| 0 | 7 | B3GNT5   |
| 0 | 7 | RASSF4   |
| 0 | 7 | SERPINA1 |
| 0 | 7 | SERPING1 |
| 0 | 7 | GM2A     |
| 0 | 7 | SLC11A1  |
| 0 | 7 | BNC2     |
| 0 | 7 | STARD13  |
| 0 | 7 | C2       |
| 0 | 7 | ENPP2    |

|   |   |         |
|---|---|---------|
| 0 | 7 | SASH1   |
| 0 | 7 | COLEC12 |
| 0 | 7 | ITSN1   |
| 0 | 7 | EPB41L3 |
| 0 | 7 | GPR34   |
| 0 | 7 | TLR2    |
| 0 | 7 | RAB20   |
| 0 | 7 | SRGAP1  |
| 0 | 7 | PDK4    |
| 0 | 7 | MCTP1   |
| 0 | 7 | GNB4    |
| 0 | 7 | FUCA1   |
| 0 | 7 | TTYH3   |
| 0 | 7 | ETS2    |
| 0 | 7 | NRP2    |
| 0 | 7 | NPL     |
| 0 | 7 | ZFHX3   |
| 0 | 7 | LAIR1   |
| 0 | 7 | SLAMF8  |
| 0 | 7 | RGL1    |
| 0 | 7 | ADAM9   |
| 0 | 7 | RCAN1   |
| 0 | 7 | PLAUR   |
| 0 | 7 | RAB13   |
| 0 | 7 | IL18    |
| 0 | 7 | PLAU    |
| 0 | 7 | FCGR1A  |
| 0 | 7 | EMILIN2 |
| 0 | 7 | SLC7A7  |
| 0 | 7 | SIRPA   |
| 0 | 7 | MPEG1   |
| 0 | 7 | CD163L1 |
| 0 | 7 | NCF2    |
| 0 | 7 | SLC15A3 |
| 0 | 7 | FAM20A  |
| 0 | 7 | SDC2    |
| 0 | 7 | KYNU    |
| 0 | 7 | TMEM51  |
| 0 | 7 | MPP1    |
| 0 | 7 | CLIC2   |
| 0 | 7 | CYFIP1  |
| 0 | 7 | DST     |
| 0 | 7 | THBD    |

|   |   |          |
|---|---|----------|
| 0 | 7 | RAB32    |
| 0 | 7 | LRP1     |
| 0 | 7 | PTAFR    |
| 0 | 7 | JDP2     |
| 0 | 7 | WDFY3    |
| 0 | 7 | ALOX5    |
| 0 | 7 | IDH1     |
| 0 | 7 | LPCAT2   |
| 0 | 7 | SHTN1    |
| 0 | 7 | ADGRE2   |
| 0 | 7 | MMP14    |
| 0 | 7 | SLC31A1  |
| 0 | 7 | GAA      |
| 0 | 7 | GAS2L3   |
| 0 | 7 | OSBPL1A  |
| 0 | 7 | TSPAN4   |
| 0 | 7 | RIN2     |
| 0 | 7 | FGD4     |
| 0 | 7 | TCEAL9   |
| 0 | 7 | SLC7A8   |
| 0 | 7 | CD93     |
| 0 | 7 | ENG      |
| 0 | 7 | AXL      |
| 0 | 7 | SMIM25   |
| 0 | 7 | CPED1    |
| 0 | 7 | NEK6     |
| 0 | 7 | CREB5    |
| 0 | 7 | HCK      |
| 0 | 7 | FAM20C   |
| 0 | 7 | SLC31A2  |
| 0 | 7 | CLEC4A   |
| 0 | 7 | ARHGAP22 |
| 0 | 7 | ITGAX    |
| 0 | 7 | CMKLR1   |
| 0 | 7 | SIGLEC12 |
| 0 | 7 | TCN2     |
| 0 | 7 | CSF2RA   |
| 0 | 7 | COLGALT1 |
| 0 | 7 | FPR1     |
| 0 | 7 | SDSL     |
| 0 | 7 | NECTIN2  |
| 0 | 7 | TRPM2    |
| 0 | 7 | TLR4     |

|           |   |           |
|-----------|---|-----------|
| 0         | 7 | ST3GAL6   |
| 0         | 7 | LRRC25    |
| 0         | 7 | SIGLEC1   |
| 0         | 7 | MRAS      |
| 0         | 7 | OLFML2B   |
| 0         | 7 | LILRB3    |
| 0         | 7 | CD300LF   |
| 0         | 7 | VAT1      |
| 0         | 7 | ARHGEF10L |
| 0         | 7 | ETV5      |
| 0         | 7 | SORT1     |
| 0         | 7 | GASK1B    |
| 0         | 7 | FHAD1     |
| 0         | 7 | OSCAR     |
| 0         | 7 | LTBR      |
| 1.55E-302 | 7 | GLMP      |
| 1.43E-299 | 7 | ACP2      |
| 4.74E-299 | 7 | SIGLEC10  |
| 1.88E-298 | 7 | TNFRSF21  |
| 3.66E-298 | 7 | CCDC88A   |
| 1.93E-296 | 7 | FBP1      |
| 7.33E-296 | 7 | DUSP3     |
| 1.32E-295 | 7 | OLR1      |
| 7.63E-295 | 7 | PILRA     |
| 3.55E-294 | 7 | MOB3B     |
| 2.44E-292 | 7 | SGK1      |
| 4.09E-292 | 7 | NHSL1     |
| 1.03E-290 | 7 | MCOLN1    |
| 2.67E-290 | 7 | SNX8      |
| 3.32E-289 | 7 | NCEH1     |
| 4.53E-289 | 7 | SLC43A3   |
| 2.11E-288 | 7 | HLA-DMA   |
| 3.48E-288 | 7 | KIF13A    |
| 4.36E-288 | 7 | HLA-DQA1  |
| 8.75E-288 | 7 | ACP5      |
| 2.74E-285 | 7 | TBXAS1    |
| 1.38E-283 | 7 | CTSD      |
| 7.42E-283 | 7 | ITGAM     |
| 8.70E-283 | 7 | RNASE6    |
| 1.13E-282 | 7 | ZNF804A   |
| 5.03E-281 | 7 | MMP19     |
| 3.00E-280 | 7 | PLEK      |
| 4.03E-280 | 7 | CD300A    |



|           |   |          |
|-----------|---|----------|
| 4.31E-280 | 7 | LILRB2   |
| 4.84E-278 | 7 | SERPINB6 |
| 2.51E-276 | 7 | TANC2    |
| 1.65E-275 | 7 | ADM      |
| 5.63E-273 | 7 | RNF130   |
| 9.69E-273 | 7 | KLF4     |
| 6.87E-272 | 7 | GRINA    |
| 5.92E-271 | 7 | NAIP     |
| 8.68E-271 | 7 | LY96     |
| 9.25E-270 | 7 | IER3     |
| 8.56E-269 | 7 | CFD      |
| 3.47E-267 | 7 | ICAM1    |
| 4.13E-267 | 7 | RRAGD    |
| 1.54E-266 | 7 | UNC93B1  |
| 2.02E-266 | 7 | PXDC1    |
| 2.70E-265 | 7 | IL13RA1  |
| 1.02E-263 | 7 | ALCAM    |
| 2.34E-263 | 7 | TNFSF13B |
| 2.96E-263 | 7 | ARHGAP18 |
| 3.39E-263 | 7 | BRI3     |
| 3.62E-263 | 7 | ACTN1    |
| 2.34E-262 | 7 | FCGR2B   |
| 3.26E-262 | 7 | PLBD1    |
| 9.11E-262 | 7 | A2M      |
| 3.57E-261 | 7 | BLVRB    |
| 2.67E-260 | 7 | CTBP2    |
| 3.96E-259 | 7 | HEXB     |
| 5.01E-259 | 7 | TNFAIP2  |
| 5.04E-259 | 7 | PEA15    |
| 6.24E-256 | 7 | SPIRE1   |
| 8.28E-255 | 7 | LGALS3BP |
| 5.83E-254 | 7 | BMP2K    |
| 2.14E-253 | 7 | MMP9     |
| 4.92E-253 | 7 | BCAT1    |
| 1.13E-252 | 7 | TLR1     |
| 3.12E-252 | 7 | ATP6AP1  |
| 2.47E-250 | 7 | ALDH2    |
| 7.67E-250 | 7 | RHOQ     |
| 7.99E-248 | 7 | HES1     |
| 6.30E-247 | 7 | CNTLN    |
| 1.08E-245 | 7 | CEP170   |
| 1.24E-245 | 7 | LY86     |
| 2.47E-244 | 7 | PPFIBP2  |

|           |   |          |
|-----------|---|----------|
| 5.40E-244 | 7 | MGST2    |
| 6.71E-244 | 7 | GNS      |
| 2.37E-243 | 7 | UBE2E2   |
| 1.02E-242 | 7 | SCARB2   |
| 4.90E-240 | 7 | CD9      |
| 1.44E-239 | 7 | LIPA     |
| 2.64E-239 | 7 | IL1B     |
| 6.67E-239 | 7 | CLIC4    |
| 8.86E-238 | 7 | SNX10    |
| 1.55E-237 | 7 | PLXND1   |
| 3.43E-237 | 7 | TNFRSF1A |
| 9.33E-236 | 7 | KIFC3    |
| 4.53E-235 | 7 | ATP6V1B2 |
| 4.92E-235 | 7 | RNF144B  |
| 1.75E-234 | 7 | ST14     |
| 2.48E-234 | 7 | SYK      |
| 1.64E-231 | 7 | SLC43A2  |
| 2.88E-231 | 7 | FGD2     |
| 1.49E-230 | 7 | C1orf162 |
| 6.37E-230 | 7 | SBF2     |
| 1.57E-229 | 7 | CCR1     |
| 2.40E-229 | 7 | SCPEP1   |
| 4.13E-229 | 7 | ATP6V0A1 |
| 6.18E-229 | 7 | S100A9   |
| 3.33E-228 | 7 | NAGA     |
| 5.46E-226 | 7 | CAMK1    |
| 1.06E-222 | 7 | BLVRA    |
| 4.87E-222 | 7 | ABL2     |
| 6.68E-222 | 7 | AP2A2    |
| 1.89E-221 | 7 | CD63     |
| 2.09E-221 | 7 | NFIC     |
| 5.71E-221 | 7 | CCL3     |
| 1.11E-219 | 7 | GOLIM4   |
| 1.89E-218 | 7 | CD40     |
| 7.36E-218 | 7 | KIAA0930 |
| 8.98E-218 | 7 | LGALS1   |
| 2.09E-215 | 7 | GNPDA1   |
| 2.32E-215 | 7 | IRAK3    |
| 5.04E-215 | 7 | TYMP     |
| 1.14E-214 | 7 | IFNGR2   |
| 1.19E-214 | 7 | SPINT2   |
| 3.12E-214 | 7 | HLA-DOA  |
| 2.15E-213 | 7 | VASH1    |

|           |   |            |
|-----------|---|------------|
| 8.78E-213 | 7 | PHACTR1    |
| 1.02E-211 | 7 | PGD        |
| 1.36E-211 | 7 | TREM1      |
| 4.85E-211 | 7 | ITPRIPL2   |
| 1.10E-209 | 7 | MAN2B1     |
| 1.17E-209 | 7 | GRK3       |
| 1.23E-209 | 7 | ZNF385A    |
| 7.60E-209 | 7 | THEMIS2    |
| 1.03E-208 | 7 | PLEKHO2    |
| 3.23E-208 | 7 | MYO1E      |
| 1.63E-207 | 7 | MB21D2     |
| 3.74E-207 | 7 | DSE        |
| 7.14E-206 | 7 | TBC1D9     |
| 1.39E-205 | 7 | BCL2A1     |
| 2.73E-203 | 7 | CD83       |
| 2.36E-202 | 7 | FAM49A     |
| 3.57E-201 | 7 | TCF7L2     |
| 7.55E-201 | 7 | AMPD3      |
| 1.35E-200 | 7 | CD151      |
| 2.02E-200 | 7 | ANXA2      |
| 4.68E-200 | 7 | VEGFA      |
| 1.20E-198 | 7 | CD302      |
| 2.88E-198 | 7 | AP2S1      |
| 1.11E-197 | 7 | CLIP2      |
| 1.32E-197 | 7 | IRF8       |
| 3.59E-197 | 7 | PLBD2      |
| 5.53E-197 | 7 | CORO1C     |
| 6.89E-197 | 7 | EPB41L2    |
| 6.16E-196 | 7 | TBC1D12    |
| 9.29E-196 | 7 | PPT1       |
| 9.68E-196 | 7 | BTK        |
| 7.69E-195 | 7 | PECAM1     |
| 1.00E-194 | 7 | GNAQ       |
| 2.96E-194 | 7 | SCIMP      |
| 2.12E-191 | 7 | SNX24      |
| 2.73E-191 | 7 | CTSA       |
| 4.93E-191 | 7 | SNAI1      |
| 7.95E-190 | 7 | SHB        |
| 8.29E-190 | 7 | LAMP2      |
| 4.04E-189 | 7 | ANXA4      |
| 1.14E-188 | 7 | AL356124.1 |
| 1.01E-187 | 7 | SIPA1L2    |
| 2.83E-187 | 7 | AKR1B1     |

|           |   |          |
|-----------|---|----------|
| 4.28E-187 | 7 | TPP1     |
| 1.10E-186 | 7 | SWAP70   |
| 1.32E-185 | 7 | MFSD12   |
| 2.32E-184 | 7 | 1-Mar    |
| 6.19E-184 | 7 | LGALS9   |
| 1.63E-183 | 7 | CIITA    |
| 4.29E-183 | 7 | SGPL1    |
| 5.24E-183 | 7 | SAT1     |
| 1.08E-182 | 7 | SOD2     |
| 1.34E-182 | 7 | FTH1     |
| 6.06E-182 | 7 | PTPN12   |
| 7.76E-182 | 7 | GAS6     |
| 8.92E-182 | 7 | ZMIZ1    |
| 1.42E-181 | 7 | TUBB6    |
| 4.83E-181 | 7 | TRIO     |
| 1.06E-180 | 7 | SCARB1   |
| 1.58E-180 | 7 | AGAP3    |
| 3.42E-180 | 7 | DPYSL2   |
| 3.60E-180 | 7 | GBA      |
| 1.65E-179 | 7 | SMIM30   |
| 5.25E-179 | 7 | NINJ1    |
| 5.81E-179 | 7 | TBC1D2   |
| 2.29E-178 | 7 | ANXA5    |
| 3.05E-177 | 7 | RHOB     |
| 3.72E-177 | 7 | BAIAP2   |
| 1.81E-175 | 7 | MGAT1    |
| 1.43E-173 | 7 | OGFRL1   |
| 1.48E-173 | 7 | PLIN3    |
| 1.85E-173 | 7 | ABR      |
| 5.10E-173 | 7 | FHIT     |
| 8.86E-173 | 7 | DUSP6    |
| 1.18E-172 | 7 | ATP6V1F  |
| 2.23E-172 | 7 | IL4I1    |
| 2.30E-171 | 7 | S100A11  |
| 2.71E-171 | 7 | SLC36A1  |
| 4.18E-171 | 7 | ATP6V0B  |
| 4.54E-171 | 7 | APP      |
| 6.61E-171 | 7 | RASGEF1B |
| 1.10E-170 | 7 | MYOF     |
| 8.75E-170 | 7 | COMT     |
| 1.13E-169 | 7 | DBNDD2   |
| 1.82E-168 | 7 | LRRK2    |
| 1.89E-168 | 7 | HLA-DQA2 |

|           |   |            |
|-----------|---|------------|
| 1.98E-168 | 7 | LGALS3     |
| 3.51E-168 | 7 | YWHAH      |
| 4.11E-168 | 7 | CD109      |
| 2.88E-166 | 7 | AKR1A1     |
| 1.59E-165 | 7 | ACSL1      |
| 1.71E-165 | 7 | SLC38A6    |
| 1.75E-164 | 7 | OAZ2       |
| 1.19E-163 | 7 | PHC2       |
| 1.79E-163 | 7 | ATP6V0C    |
| 2.27E-163 | 7 | PPM1L      |
| 3.00E-163 | 7 | DRAM1      |
| 7.39E-163 | 7 | LYN        |
| 1.18E-162 | 7 | CLCN7      |
| 2.62E-162 | 7 | SKAP2      |
| 1.69E-160 | 7 | GNG10      |
| 3.37E-160 | 7 | CPNE8      |
| 3.73E-160 | 7 | LAPTM5     |
| 5.21E-160 | 7 | CTTNBP2NL  |
| 6.48E-160 | 7 | CTNND1     |
| 4.71E-159 | 7 | AL078604.4 |
| 2.24E-158 | 7 | TCEAL4     |
| 5.26E-157 | 7 | ARRB1      |
| 1.78E-156 | 7 | LACTB      |
| 3.36E-156 | 7 | SYNGR2     |
| 7.98E-156 | 7 | SH2B3      |
| 6.40E-155 | 7 | SESTD1     |
| 2.55E-154 | 7 | QKI        |
| 3.30E-154 | 7 | NAGK       |
| 1.08E-153 | 7 | CTSC       |
| 2.68E-153 | 7 | FKBP15     |
| 4.62E-153 | 7 | ATOX1      |
| 5.26E-153 | 7 | ASPH       |
| 6.78E-153 | 7 | DDAH2      |
| 1.21E-152 | 7 | HSD17B4    |
| 1.87E-152 | 7 | IL1RN      |
| 1.87E-152 | 7 | NFKBIE     |
| 8.56E-152 | 7 | G0S2       |
| 8.65E-152 | 7 | RAB34      |
| 8.79E-152 | 7 | MEF2C      |
| 5.92E-151 | 7 | ARRB2      |
| 1.04E-150 | 7 | MSRB2      |
| 4.99E-150 | 7 | C20orf194  |
| 1.12E-149 | 7 | KMO        |

|           |   |          |
|-----------|---|----------|
| 2.64E-149 | 7 | MGLL     |
| 2.78E-148 | 7 | ACER3    |
| 1.59E-147 | 7 | PTTG1IP  |
| 1.64E-146 | 7 | GLA      |
| 3.54E-146 | 7 | EGR3     |
| 3.77E-146 | 7 | GSAP     |
| 5.29E-146 | 7 | LRRC23   |
| 9.03E-146 | 7 | HEXA     |
| 1.31E-144 | 7 | KIF16B   |
| 2.67E-144 | 7 | CSTB     |
| 2.81E-144 | 7 | CSTA     |
| 8.83E-144 | 7 | DOCK7    |
| 2.21E-143 | 7 | GSTO1    |
| 2.27E-143 | 7 | PEAK1    |
| 2.34E-143 | 7 | FUCA2    |
| 3.42E-143 | 7 | TCEAL3   |
| 1.14E-142 | 7 | CD80     |
| 1.22E-142 | 7 | SDCCAG8  |
| 1.61E-142 | 7 | LILRB1   |
| 2.03E-142 | 7 | ARHGAP21 |
| 2.05E-142 | 7 | NCOA4    |
| 4.26E-141 | 7 | FRMD4B   |
| 1.28E-140 | 7 | OPN3     |
| 4.14E-140 | 7 | LAMP1    |
| 9.02E-140 | 7 | NUDT16   |
| 6.20E-139 | 7 | METTL7A  |
| 2.25E-138 | 7 | PIK3AP1  |
| 2.47E-138 | 7 | AP1B1    |
| 6.71E-138 | 7 | PLXNC1   |
| 1.40E-137 | 7 | CD81     |
| 2.22E-136 | 7 | MPZL1    |
| 2.79E-135 | 7 | SRGAP2B  |
| 9.52E-135 | 7 | LAT2     |
| 1.53E-134 | 7 | MKNK1    |
| 6.13E-134 | 7 | PARVB    |
| 4.18E-133 | 7 | PPARD    |
| 4.85E-133 | 7 | DNASE2   |
| 4.19E-132 | 7 | PYCARD   |
| 2.14E-131 | 7 | GABARAP  |
| 1.92E-130 | 7 | ALAS1    |
| 2.94E-130 | 7 | PLEKHO1  |
| 8.45E-130 | 7 | BCKDK    |
| 4.42E-129 | 7 | ARHGAP10 |

|           |   |          |
|-----------|---|----------|
| 4.72E-129 | 7 | SUSD1    |
| 1.03E-128 | 7 | KIF1B    |
| 2.29E-128 | 7 | CTNNA1   |
| 5.57E-128 | 7 | SMCO4    |
| 1.85E-127 | 7 | FGR      |
| 1.99E-127 | 7 | FUOM     |
| 2.48E-127 | 7 | TCF4     |
| 3.99E-127 | 7 | TIMP1    |
| 5.57E-127 | 7 | EVI5     |
| 1.11E-126 | 7 | PRDX1    |
| 1.54E-126 | 7 | EPAS1    |
| 1.58E-126 | 7 | FLOT1    |
| 1.45E-125 | 7 | SEMA4A   |
| 4.30E-125 | 7 | ZNF710   |
| 6.43E-124 | 7 | ERRFI1   |
| 1.01E-123 | 7 | PDXK     |
| 1.65E-123 | 7 | NQO2     |
| 3.26E-123 | 7 | GAB2     |
| 4.65E-123 | 7 | BASP1    |
| 5.87E-123 | 7 | HLA-DRB5 |
| 1.12E-122 | 7 | TEC      |
| 1.73E-122 | 7 | ADA2     |
| 4.90E-122 | 7 | SLC16A3  |
| 6.42E-122 | 7 | LPAR6    |
| 1.58E-121 | 7 | WDFY4    |
| 3.51E-121 | 7 | CPPED1   |
| 4.55E-121 | 7 | LATS2    |
| 1.21E-120 | 7 | PEPD     |
| 1.72E-120 | 7 | CPQ      |
| 3.87E-120 | 7 | ABHD12   |
| 2.16E-119 | 7 | M6PR     |
| 3.98E-119 | 7 | TENT5A   |
| 6.33E-119 | 7 | CNDP2    |
| 9.66E-119 | 7 | SLC25A24 |
| 1.08E-118 | 7 | RNF13    |
| 1.22E-118 | 7 | SH3BP5   |
| 1.48E-118 | 7 | SLC8B1   |
| 2.73E-118 | 7 | CD59     |
| 4.13E-118 | 7 | ATF5     |
| 6.77E-118 | 7 | NCF4     |
| 1.16E-117 | 7 | H2AFY    |
| 1.81E-117 | 7 | PAK1     |
| 5.46E-117 | 7 | CYBA     |

|           |   |          |
|-----------|---|----------|
| 1.69E-116 | 7 | RAC1     |
| 1.75E-116 | 7 | LYL1     |
| 2.12E-116 | 7 | GPX4     |
| 2.27E-116 | 7 | ZNF438   |
| 5.41E-116 | 7 | LITAF    |
| 1.85E-114 | 7 | TPD52L2  |
| 5.21E-114 | 7 | PRKAG2   |
| 5.59E-114 | 7 | ATP6V1C1 |
| 9.79E-114 | 7 | SRGAP2   |
| 1.98E-113 | 7 | ZFYVE16  |
| 3.75E-113 | 7 | EVA1B    |
| 1.50E-112 | 7 | TUBB     |
| 3.21E-112 | 7 | TPRA1    |
| 8.09E-112 | 7 | NUCB1    |
| 1.27E-111 | 7 | EIF4EBP1 |
| 3.83E-111 | 7 | GRASP    |
| 5.56E-111 | 7 | SAMD4A   |
| 7.09E-111 | 7 | CDK2AP1  |
| 4.04E-110 | 7 | CLN8     |
| 8.02E-110 | 7 | PCBD1    |
| 4.11E-109 | 7 | HCFC1R1  |
| 7.81E-108 | 7 | VAMP8    |
| 8.47E-107 | 7 | ALPK1    |
| 1.37E-105 | 7 | PTMS     |
| 3.66E-105 | 7 | VEGFB    |
| 5.34E-105 | 7 | SOAT1    |
| 1.07E-104 | 7 | DUSP23   |
| 1.66E-104 | 7 | TFPT     |
| 1.89E-104 | 7 | RIPK2    |
| 2.96E-104 | 7 | UPP1     |
| 6.86E-104 | 7 | PKM      |
| 1.08E-103 | 7 | LAMTOR2  |
| 2.13E-103 | 7 | CCL3L1   |
| 1.23E-102 | 7 | ARPC5    |
| 1.33E-102 | 7 | QSOX1    |
| 1.55E-102 | 7 | ZYX      |
| 3.14E-102 | 7 | GPR137B  |
| 3.38E-102 | 7 | HAVCR2   |
| 3.45E-102 | 7 | SLC39A1  |
| 4.85E-102 | 7 | ATP6AP2  |
| 5.62E-102 | 7 | HSBP1    |
| 5.94E-102 | 7 | SPG21    |
| 7.11E-102 | 7 | NAMPT    |



|           |   |          |
|-----------|---|----------|
| 7.61E-102 | 7 | ARL8A    |
| 8.65E-102 | 7 | CRTAP    |
| 9.04E-102 | 7 | TALDO1   |
| 9.84E-102 | 7 | SNTB1    |
| 1.26E-101 | 7 | YBX1     |
| 2.21E-101 | 7 | KLF10    |
| 5.37E-101 | 7 | NEDD4L   |
| 8.19E-101 | 7 | SLC11A2  |
| 1.17E-100 | 7 | PDIA4    |
| 3.57E-100 | 7 | MXD1     |
| 3.63E-100 | 7 | LIMS1    |
| 6.07E-100 | 7 | DOP1B    |
| 7.51E-100 | 7 | SLC45A4  |
| 7.69E-100 | 7 | NME2     |
| 7.82E-100 | 7 | PLSCR1   |
| 1.16E-99  | 7 | FEZ2     |
| 1.39E-99  | 7 | IRAK2    |
| 2.46E-99  | 7 | STX4     |
| 3.84E-99  | 7 | MANBA    |
| 8.73E-99  | 7 | ATP6V0D1 |
| 9.95E-99  | 7 | SLC66A2  |
| 6.70E-98  | 7 | DENND3   |
| 1.66E-97  | 7 | P4HA1    |
| 2.15E-97  | 7 | PTPN6    |
| 3.79E-97  | 7 | NTAN1    |
| 5.57E-97  | 7 | MGST3    |
| 1.04E-96  | 7 | PLEKHM2  |
| 1.71E-96  | 7 | VAMP3    |
| 2.32E-96  | 7 | CD72     |
| 4.75E-96  | 7 | IFNGR1   |
| 8.57E-96  | 7 | PTPN9    |
| 1.94E-95  | 7 | CANX     |
| 2.72E-94  | 7 | STX7     |
| 5.42E-94  | 7 | NXF1     |
| 2.27E-93  | 7 | RNH1     |
| 3.11E-93  | 7 | ACTB     |
| 9.48E-93  | 7 | USP6NL   |
| 1.00E-92  | 7 | RAB7A    |
| 1.74E-92  | 7 | GAS7     |
| 2.14E-92  | 7 | TOM1     |
| 3.00E-92  | 7 | AGPAT2   |
| 3.68E-92  | 7 | 2-Mar    |
| 3.70E-92  | 7 | TMBIM1   |

|          |   |          |
|----------|---|----------|
| 4.37E-92 | 7 | CBR1     |
| 8.41E-92 | 7 | SLC39A11 |
| 1.19E-91 | 7 | IL3RA    |
| 2.24E-91 | 7 | KLHL6    |
| 2.63E-91 | 7 | ITGA5    |
| 3.05E-91 | 7 | RGS19    |
| 4.87E-91 | 7 | ANKS1A   |
| 8.49E-91 | 7 | TSPAN33  |
| 1.46E-90 | 7 | TNFSF12  |
| 1.58E-90 | 7 | P2RX4    |
| 2.18E-90 | 7 | CD4      |
| 6.15E-90 | 7 | PTPRE    |
| 8.03E-90 | 7 | HSD17B12 |
| 9.29E-90 | 7 | TFRC     |
| 2.29E-89 | 7 | STK3     |
| 4.85E-89 | 7 | ITGB2    |
| 6.93E-89 | 7 | SLC17A5  |
| 1.00E-88 | 7 | PRDX3    |
| 1.31E-88 | 7 | TPM4     |
| 3.76E-88 | 7 | RREB1    |
| 5.36E-88 | 7 | GLIPR2   |
| 7.37E-88 | 7 | EFHD2    |
| 1.24E-87 | 7 | GNA15    |
| 1.64E-87 | 7 | FABP5    |
| 1.72E-87 | 7 | LRRK1    |
| 2.80E-87 | 7 | PDE4DIP  |
| 3.17E-87 | 7 | SPART    |
| 4.30E-87 | 7 | ATP1B1   |
| 4.77E-87 | 7 | APLP2    |
| 1.39E-86 | 7 | VAV2     |
| 1.39E-86 | 7 | SMIM3    |
| 2.02E-86 | 7 | ARHGAP31 |
| 1.16E-85 | 7 | TSPAN3   |
| 1.26E-85 | 7 | CREBL2   |
| 2.46E-85 | 7 | TCIRG1   |
| 2.56E-85 | 7 | CAT      |
| 4.66E-85 | 7 | GADD45G  |
| 6.01E-85 | 7 | LEPROT   |
| 9.03E-85 | 7 | PTPN18   |
| 1.79E-84 | 7 | RASGRP3  |
| 3.12E-84 | 7 | SLC25A13 |
| 3.60E-84 | 7 | SLC2A13  |
| 5.19E-84 | 7 | GNAI2    |

|          |   |         |
|----------|---|---------|
| 5.51E-84 | 7 | SNX27   |
| 6.92E-84 | 7 | SDCBP   |
| 1.91E-83 | 7 | NFIL3   |
| 2.31E-83 | 7 | OTUD1   |
| 2.60E-83 | 7 | GSTP1   |
| 2.84E-83 | 7 | TUBA1B  |
| 8.04E-83 | 7 | CHCHD10 |
| 9.72E-83 | 7 | PPIF    |
| 1.17E-82 | 7 | FOXO3   |
| 3.68E-82 | 7 | VASP    |
| 4.50E-82 | 7 | SAV1    |
| 1.31E-81 | 7 | GPD2    |
| 1.33E-81 | 7 | NR4A2   |
| 2.31E-81 | 7 | CHKA    |
| 3.67E-81 | 7 | VKORC1  |
| 1.06E-80 | 7 | P4HB    |
| 1.10E-80 | 7 | AP1S2   |
| 1.30E-80 | 7 | TEX14   |
| 1.53E-80 | 7 | NFKBID  |
| 4.33E-80 | 7 | PFKL    |
| 4.48E-80 | 7 | FERMT3  |
| 6.00E-80 | 7 | ZFAND5  |
| 6.05E-80 | 7 | VIM     |
| 9.16E-80 | 7 | JOSD2   |
| 1.80E-79 | 7 | BCAP31  |
| 2.04E-79 | 7 | BAG3    |
| 2.65E-79 | 7 | NAAA    |
| 4.18E-79 | 7 | LAP3    |
| 4.31E-79 | 7 | RNASET2 |
| 4.60E-79 | 7 | RAPH1   |
| 6.88E-79 | 7 | CALU    |
| 6.90E-79 | 7 | SLC12A7 |
| 1.19E-78 | 7 | EHBP1L1 |
| 1.84E-78 | 7 | VAC14   |
| 1.87E-78 | 7 | RP2     |
| 2.43E-78 | 7 | ACSL3   |
| 2.86E-78 | 7 | C9orf72 |
| 6.37E-78 | 7 | SH3BP2  |
| 1.03E-77 | 7 | IER5    |
| 1.17E-77 | 7 | EIF4A1  |
| 1.24E-77 | 7 | ADPGK   |
| 1.49E-77 | 7 | CNPY3   |
| 2.72E-77 | 7 | RIN3    |

|          |   |            |
|----------|---|------------|
| 2.89E-77 | 7 | TET3       |
| 3.64E-77 | 7 | TNFRSF10D  |
| 5.72E-77 | 7 | S100A10    |
| 7.63E-77 | 7 | ATG7       |
| 9.16E-77 | 7 | GNA12      |
| 5.06E-76 | 7 | ACOT13     |
| 1.69E-75 | 7 | NCOR2      |
| 2.08E-75 | 7 | GIPC1      |
| 2.11E-75 | 7 | CDKN1A     |
| 2.84E-75 | 7 | KLF7       |
| 3.06E-75 | 7 | LAMTOR1    |
| 3.08E-75 | 7 | TULP2      |
| 3.23E-75 | 7 | GUSB       |
| 7.83E-75 | 7 | EEDP1      |
| 8.50E-75 | 7 | SUMF1      |
| 1.68E-74 | 7 | TUBA1C     |
| 1.81E-74 | 7 | RASSF2     |
| 5.37E-74 | 7 | WARS       |
| 6.47E-74 | 7 | AHCYL1     |
| 6.94E-74 | 7 | SMS        |
| 1.12E-73 | 7 | TUBGCP2    |
| 1.24E-73 | 7 | CUX1       |
| 1.45E-73 | 7 | DRAM2      |
| 1.60E-73 | 7 | RAP2B      |
| 1.92E-73 | 7 | MEF2A      |
| 2.04E-73 | 7 | SQOR       |
| 2.32E-73 | 7 | SNX29      |
| 2.37E-73 | 7 | RTN4       |
| 4.50E-73 | 7 | RHBDF2     |
| 5.00E-73 | 7 | CHID1      |
| 7.91E-73 | 7 | FNDC3B     |
| 1.37E-72 | 7 | AFDN       |
| 1.42E-72 | 7 | SNX3       |
| 2.74E-72 | 7 | MAFF       |
| 3.83E-72 | 7 | LAPTM4A    |
| 6.44E-72 | 7 | TBC1D14    |
| 7.87E-72 | 7 | TSC22D1    |
| 2.24E-71 | 7 | GADD45B    |
| 4.85E-71 | 7 | STX6       |
| 7.20E-71 | 7 | NUBP1      |
| 1.88E-70 | 7 | RNASEK     |
| 8.61E-70 | 7 | AF117829.1 |
| 9.19E-70 | 7 | HIF1A      |

|          |   |          |
|----------|---|----------|
| 2.00E-69 | 7 | SLC44A1  |
| 2.16E-69 | 7 | CPEB4    |
| 2.26E-69 | 7 | ADAM17   |
| 2.79E-69 | 7 | GNB2     |
| 3.00E-69 | 7 | RFX2     |
| 3.75E-69 | 7 | PHACTR4  |
| 1.62E-68 | 7 | ATP13A3  |
| 3.68E-68 | 7 | BNIP3L   |
| 3.69E-68 | 7 | BAZ2B    |
| 3.76E-67 | 7 | SLC25A19 |
| 6.23E-67 | 7 | VPS35    |
| 7.58E-67 | 7 | PABPC4   |
| 1.08E-66 | 7 | DENND1A  |
| 1.14E-66 | 7 | UBE2D1   |
| 1.18E-66 | 7 | RAB5C    |
| 1.60E-66 | 7 | PAPSS1   |
| 2.32E-66 | 7 | TMSB10   |
| 3.13E-66 | 7 | ARSB     |
| 3.38E-66 | 7 | ITM2B    |
| 3.88E-66 | 7 | RRBP1    |
| 4.66E-66 | 7 | ATP6V1A  |
| 5.06E-66 | 7 | NENF     |
| 1.73E-65 | 7 | EEA1     |
| 6.60E-65 | 7 | SMIM14   |
| 2.43E-64 | 7 | YWHAG    |
| 1.28E-63 | 7 | ZFP36L1  |
| 2.00E-63 | 7 | CLTA     |
| 6.36E-63 | 7 | NPTN     |
| 7.19E-63 | 7 | C4orf48  |
| 1.25E-62 | 7 | TMEM147  |
| 1.54E-62 | 7 | IFNAR1   |
| 2.27E-62 | 7 | ABHD5    |
| 5.08E-62 | 7 | RPN1     |
| 5.60E-62 | 7 | UBTD2    |
| 7.08E-62 | 7 | PRNP     |
| 2.00E-61 | 7 | GCLC     |
| 2.88E-61 | 7 | TRAPPC5  |
| 2.96E-61 | 7 | GNA13    |
| 4.60E-61 | 7 | IER5L    |
| 7.54E-61 | 7 | ATP2A2   |
| 9.14E-61 | 7 | SERF2    |
| 1.02E-60 | 7 | CMTM6    |
| 2.10E-60 | 7 | LCP2     |

|          |   |            |
|----------|---|------------|
| 2.24E-60 | 7 | SIL1       |
| 2.70E-60 | 7 | SNX2       |
| 3.09E-60 | 7 | ATP2C1     |
| 3.44E-60 | 7 | TPI1       |
| 1.20E-59 | 7 | PDE8A      |
| 1.50E-59 | 7 | ABI3       |
| 2.36E-59 | 7 | CALR       |
| 4.78E-59 | 7 | TMEM30A    |
| 5.73E-59 | 7 | DBI        |
| 1.21E-58 | 7 | ODF3B      |
| 1.65E-58 | 7 | TMEM14C    |
| 3.00E-58 | 7 | CD84       |
| 5.05E-58 | 7 | NRIP1      |
| 9.20E-58 | 7 | CAPNS1     |
| 1.11E-57 | 7 | PHLDA2     |
| 1.16E-57 | 7 | PRCP       |
| 2.07E-57 | 7 | TKT        |
| 3.67E-57 | 7 | VPS8       |
| 6.08E-57 | 7 | MIR181A1HG |
| 1.01E-56 | 7 | GNG7       |
| 3.12E-56 | 7 | ARHGAP24   |
| 3.28E-56 | 7 | SUMO3      |
| 6.40E-56 | 7 | PLEKHB2    |
| 1.02E-55 | 7 | FAM210A    |
| 1.95E-55 | 7 | SLC25A33   |
| 2.06E-55 | 7 | TSPO       |
| 6.01E-55 | 7 | ARPC3      |
| 8.47E-55 | 7 | ECHS1      |
| 1.39E-54 | 7 | ARL8B      |
| 2.98E-54 | 7 | CAP1       |
| 8.55E-54 | 7 | DBNL       |
| 1.24E-53 | 7 | SIPA1L1    |
| 2.36E-53 | 7 | RALA       |
| 5.98E-53 | 7 | MTSS1      |
| 1.37E-52 | 7 | RTN3       |
| 5.11E-52 | 7 | SGK3       |
| 5.48E-52 | 7 | TNFRSF10B  |
| 1.28E-51 | 7 | NFATC1     |
| 2.59E-51 | 7 | TXN        |
| 3.78E-51 | 7 | ADCY3      |
| 6.48E-51 | 7 | ITPR2      |
| 1.38E-50 | 7 | CHD9       |
| 4.07E-50 | 7 | AP2M1      |

|          |   |          |
|----------|---|----------|
| 4.81E-50 | 7 | CLTC     |
| 9.03E-50 | 7 | GRB2     |
| 1.03E-49 | 7 | VPS29    |
| 6.21E-49 | 7 | GBP1     |
| 9.93E-49 | 7 | RHOG     |
| 1.21E-48 | 7 | CTDNEP1  |
| 1.31E-48 | 7 | MYO9B    |
| 3.68E-48 | 7 | KDELR1   |
| 5.06E-48 | 7 | CCDC50   |
| 7.21E-48 | 7 | ZEB2     |
| 7.79E-48 | 7 | SAP30    |
| 1.44E-47 | 7 | RHOA     |
| 1.52E-47 | 7 | MAP3K13  |
| 1.70E-47 | 7 | HIP1     |
| 4.62E-47 | 7 | ATP6V1E1 |
| 6.73E-47 | 7 | RBPJ     |
| 2.38E-46 | 7 | H2AFJ    |
| 5.37E-46 | 7 | C6orf62  |
| 9.52E-46 | 7 | ARPC1B   |
| 1.49E-45 | 7 | OAZ1     |
| 6.36E-44 | 7 | COTL1    |
| 1.04E-43 | 7 | FCHSD2   |
| 1.28E-43 | 7 | MLEC     |
| 2.24E-43 | 7 | GDI2     |
| 3.33E-43 | 7 | TCOF1    |
| 3.37E-43 | 7 | NCKAP1L  |
| 5.61E-43 | 7 | NEAT1    |
| 6.64E-43 | 7 | BHLHE40  |
| 9.38E-43 | 7 | EMP3     |
| 2.82E-42 | 7 | MYDGF    |
| 3.90E-42 | 7 | TMBIM6   |
| 6.21E-42 | 7 | SPATS2   |
| 7.77E-42 | 7 | ANKH     |
| 7.82E-42 | 7 | NAPA     |
| 1.10E-41 | 7 | POLG2    |
| 2.40E-41 | 7 | OS9      |
| 2.40E-41 | 7 | TIMM8B   |
| 3.12E-41 | 7 | RB1      |
| 7.22E-41 | 7 | RNF181   |
| 8.43E-41 | 7 | PGLS     |
| 4.71E-40 | 7 | CAPZB    |
| 5.00E-40 | 7 | SNAPC1   |
| 6.29E-40 | 7 | NR4A3    |

|          |   |            |
|----------|---|------------|
| 7.59E-40 | 7 | PIKFYVE    |
| 9.87E-40 | 7 | ATF6       |
| 1.04E-39 | 7 | LMNA       |
| 1.46E-39 | 7 | WASHC2A    |
| 4.84E-39 | 7 | AC020916.1 |
| 5.35E-39 | 7 | SH3BGRL    |
| 8.42E-39 | 7 | ZNF433-AS1 |
| 8.62E-39 | 7 | ATP6V0E1   |
| 9.29E-39 | 7 | RHEB       |
| 9.42E-39 | 7 | CCSER1     |
| 9.74E-39 | 7 | KDM6B      |
| 1.23E-38 | 7 | ATP5PD     |
| 1.44E-38 | 7 | RGS10      |
| 5.14E-38 | 7 | POMP       |
| 6.24E-38 | 7 | TMEM219    |
| 1.15E-37 | 7 | TSC22D2    |
| 1.67E-37 | 7 | MAP3K8     |
| 2.16E-37 | 7 | NECAP2     |
| 2.31E-37 | 7 | RGS2       |
| 3.01E-37 | 7 | FKBP1A     |
| 3.88E-37 | 7 | S100A6     |
| 7.40E-37 | 7 | CKS2       |
| 9.34E-37 | 7 | MOB1A      |
| 1.51E-36 | 7 | CHMP1B     |
| 2.20E-36 | 7 | ENO1       |
| 2.35E-36 | 7 | PSMA4      |
| 3.13E-36 | 7 | SLC20A1    |
| 1.84E-35 | 7 | IFI27      |
| 4.71E-35 | 7 | ASAP1      |
| 1.03E-34 | 7 | SPAG9      |
| 1.21E-34 | 7 | DPP7       |
| 2.02E-34 | 7 | NDUFB2     |
| 3.40E-34 | 7 | PLIN2      |
| 6.81E-34 | 7 | AHR        |
| 8.75E-34 | 7 | GBE1       |
| 1.06E-33 | 7 | ERO1A      |
| 8.18E-33 | 7 | TPM3       |
| 8.61E-33 | 7 | GNG5       |
| 1.34E-32 | 7 | GPR183     |
| 1.68E-32 | 7 | RILPL2     |
| 1.92E-32 | 7 | ZSWIM6     |
| 1.95E-32 | 7 | SSR3       |
| 3.55E-32 | 7 | BST2       |



|          |   |            |
|----------|---|------------|
| 4.21E-32 | 7 | HOMER1     |
| 1.01E-31 | 7 | INSIG1     |
| 1.83E-31 | 7 | ETV6       |
| 4.74E-31 | 7 | SERPINB1   |
| 9.63E-31 | 7 | UST        |
| 1.26E-30 | 7 | RAPGEF1    |
| 2.89E-30 | 7 | TXN2       |
| 3.04E-30 | 7 | VDAC1      |
| 4.53E-30 | 7 | MYL6       |
| 4.61E-30 | 7 | DUSP1      |
| 4.95E-30 | 7 | MICOS10    |
| 5.96E-30 | 7 | CPEB2      |
| 7.36E-30 | 7 | PCBP1      |
| 5.43E-29 | 7 | SCP2       |
| 9.87E-29 | 7 | PDIA6      |
| 9.69E-28 | 7 | KCNQ1OT1   |
| 1.19E-27 | 7 | NFKB1      |
| 1.61E-27 | 7 | MYO5A      |
| 1.63E-27 | 7 | PFN1       |
| 4.74E-27 | 7 | TAOK3      |
| 7.00E-27 | 7 | ATP5F1C    |
| 8.55E-27 | 7 | ANKRD33B   |
| 6.47E-26 | 7 | PDIA3      |
| 1.48E-25 | 7 | ZFAND2A    |
| 4.28E-25 | 7 | MGMT       |
| 7.25E-25 | 7 | EIF4A3     |
| 6.20E-24 | 7 | CLIC1      |
| 1.53E-23 | 7 | ZNF706     |
| 1.79E-23 | 7 | AFF4       |
| 2.43E-23 | 7 | BZW2       |
| 3.74E-23 | 7 | TACC1      |
| 7.57E-23 | 7 | ATP1B3     |
| 1.39E-22 | 7 | HIF1A-AS3  |
| 2.89E-22 | 7 | SQSTM1     |
| 4.20E-22 | 7 | PSMB3      |
| 4.38E-22 | 7 | BLOC1S1    |
| 1.61E-21 | 7 | ACTR3      |
| 4.07E-21 | 7 | AC120193.1 |
| 4.64E-21 | 7 | CD164      |
| 8.22E-21 | 7 | TMED10     |
| 2.00E-20 | 7 | PPIB       |
| 5.04E-20 | 7 | NFKBIZ     |
| 8.32E-20 | 7 | UQCR10     |

|             |   |          |
|-------------|---|----------|
| 1.78E-19    | 7 | CFL1     |
| 2.68E-19    | 7 | SLC25A5  |
| 9.28E-19    | 7 | NOP10    |
| 1.00E-18    | 7 | DPYD     |
| 1.09E-18    | 7 | ACTR2    |
| 2.23E-18    | 7 | SLAMF7   |
| 3.99E-18    | 7 | COX5B    |
| 7.03E-18    | 7 | PSMB6    |
| 1.14E-17    | 7 | MFSD4B   |
| 1.24E-17    | 7 | PSME2    |
| 1.28E-17    | 7 | ATP5PB   |
| 1.55E-16    | 7 | GAPDH    |
| 2.95E-16    | 7 | LRPAP1   |
| 1.24E-15    | 7 | ATP5MF   |
| 3.87E-15    | 7 | PRELID1  |
| 1.60E-14    | 7 | ATP5MC3  |
| 2.00E-14    | 7 | IFI6     |
| 3.19E-14    | 7 | MACF1    |
| 3.48E-14    | 7 | BANK1    |
| 1.64E-13    | 7 | COX6B1   |
| 5.63E-13    | 7 | SARNP    |
| 7.64E-13    | 7 | CCDC138  |
| 1.08E-12    | 7 | ARPC2    |
| 1.34E-12    | 7 | VAMP5    |
| 2.60E-12    | 7 | ATP5F1E  |
| 8.72E-10    | 7 | SLC2A3   |
| 9.85E-10    | 7 | NUFIP2   |
| 6.34E-08    | 7 | WTAP     |
| 0.005477147 | 7 | ATF7IP2  |
| 1           | 7 | ERO1B    |
| 0           | 8 | HLA-DQA1 |
| 0           | 8 | HLA-DQB1 |
| 0           | 8 | HLA-DPA1 |
| 0           | 8 | HLA-DRB1 |
| 0           | 8 | HLA-DRA  |
| 0           | 8 | HLA-DPB1 |
| 0           | 8 | CD86     |
| 0           | 8 | CD74     |
| 0           | 8 | CALCRL   |
| 0           | 8 | CSF2RA   |
| 0           | 8 | P2RY6    |
| 0           | 8 | ALDH2    |
| 0           | 8 | PKIB     |

|           |   |          |
|-----------|---|----------|
| 0         | 8 | PPP1R14A |
| 0         | 8 | HLA-DMB  |
| 0         | 8 | CIITA    |
| 0         | 8 | SERPINF1 |
| 0         | 8 | GPR157   |
| 0         | 8 | CLECL1   |
| 0         | 8 | SPIB     |
| 0         | 8 | CD1C     |
| 0         | 8 | PLD4     |
| 0         | 8 | SEMA7A   |
| 0         | 8 | FLT3     |
| 1.27E-290 | 8 | CD83     |
| 4.87E-286 | 8 | FAM49A   |
| 4.22E-284 | 8 | GRASP    |
| 3.85E-283 | 8 | IRF8     |
| 2.87E-280 | 8 | HLA-DQA2 |
| 6.75E-279 | 8 | ZBTB46   |
| 3.66E-277 | 8 | SYNGR2   |
| 1.26E-276 | 8 | CLIC2    |
| 4.64E-275 | 8 | IFI30    |
| 1.51E-271 | 8 | CTSH     |
| 7.54E-269 | 8 | HLA-DMA  |
| 1.08E-257 | 8 | SPINT2   |
| 4.17E-255 | 8 | HDAC9    |
| 4.30E-254 | 8 | DDAH2    |
| 9.21E-253 | 8 | MEF2C    |
| 3.94E-252 | 8 | KYNU     |
| 2.76E-246 | 8 | THEMIS2  |
| 1.00E-240 | 8 | CD40     |
| 4.67E-238 | 8 | MCOLN2   |
| 2.65E-236 | 8 | CTSZ     |
| 8.29E-236 | 8 | SPI1     |
| 5.84E-232 | 8 | IL4I1    |
| 6.03E-228 | 8 | UBE2E2   |
| 5.14E-227 | 8 | FAM160A1 |
| 1.15E-223 | 8 | WDFY4    |
| 2.28E-217 | 8 | U62317.4 |
| 3.79E-217 | 8 | GSN      |
| 1.82E-215 | 8 | DAPK1    |
| 2.57E-212 | 8 | GRN      |
| 3.42E-212 | 8 | SNX8     |
| 7.69E-212 | 8 | SULF2    |
| 1.14E-210 | 8 | OPN3     |

|           |   |          |
|-----------|---|----------|
| 2.16E-209 | 8 | MNDA     |
| 1.18E-205 | 8 | SH2B3    |
| 6.42E-205 | 8 | PRKAR2B  |
| 1.43E-204 | 8 | RASSF2   |
| 2.07E-204 | 8 | SMIM14   |
| 2.68E-201 | 8 | BCL2A1   |
| 5.57E-199 | 8 | LY86     |
| 7.75E-198 | 8 | CLCN5    |
| 2.32E-197 | 8 | LGALS2   |
| 2.64E-197 | 8 | CYBB     |
| 1.01E-195 | 8 | PAK1     |
| 6.86E-193 | 8 | BASP1    |
| 3.15E-191 | 8 | CCSER1   |
| 5.09E-188 | 8 | LYN      |
| 4.66E-187 | 8 | PEA15    |
| 1.06E-186 | 8 | TSPAN33  |
| 5.06E-186 | 8 | C12orf45 |
| 4.42E-185 | 8 | CD80     |
| 8.46E-185 | 8 | TYROBP   |
| 2.01E-182 | 8 | CSF2RB   |
| 1.33E-181 | 8 | SWAP70   |
| 2.45E-179 | 8 | CST3     |
| 1.49E-176 | 8 | GRK3     |
| 1.81E-175 | 8 | ETV3     |
| 2.44E-175 | 8 | PLEK     |
| 3.21E-174 | 8 | CCDC88A  |
| 1.02E-172 | 8 | PHACTR1  |
| 9.00E-172 | 8 | GNG7     |
| 4.78E-171 | 8 | TCF4     |
| 5.97E-171 | 8 | DPYSL2   |
| 9.43E-171 | 8 | SLC15A4  |
| 2.68E-170 | 8 | RAB31    |
| 3.33E-169 | 8 | CDK2AP1  |
| 9.70E-168 | 8 | LST1     |
| 4.51E-167 | 8 | RHEX     |
| 1.75E-165 | 8 | GPR183   |
| 9.47E-165 | 8 | HLA-DOB  |
| 5.24E-164 | 8 | NFKBID   |
| 1.06E-162 | 8 | AP1S3    |
| 1.54E-161 | 8 | RBM47    |
| 1.55E-161 | 8 | SRC      |
| 1.66E-161 | 8 | NR4A3    |
| 1.96E-160 | 8 | HCK      |

|           |   |          |
|-----------|---|----------|
| 2.28E-159 | 8 | HLA-DOA  |
| 5.48E-159 | 8 | P2RY14   |
| 2.35E-158 | 8 | ALCAM    |
| 7.37E-158 | 8 | BID      |
| 1.78E-157 | 8 | RNASE6   |
| 3.62E-157 | 8 | SLC41A2  |
| 7.98E-157 | 8 | NECTIN2  |
| 1.32E-156 | 8 | ATF5     |
| 1.54E-151 | 8 | IL18     |
| 1.68E-150 | 8 | CMTM6    |
| 4.96E-150 | 8 | DAPP1    |
| 1.36E-148 | 8 | TTYH2    |
| 4.76E-148 | 8 | SYK      |
| 8.14E-148 | 8 | LGALS9   |
| 1.39E-147 | 8 | LRRK1    |
| 3.36E-147 | 8 | FCHSD2   |
| 1.00E-146 | 8 | CXCL16   |
| 2.23E-146 | 8 | CCDC50   |
| 1.42E-145 | 8 | NRARP    |
| 1.63E-145 | 8 | TBC1D9   |
| 2.21E-143 | 8 | KLF4     |
| 1.69E-142 | 8 | GAPT     |
| 3.92E-142 | 8 | TUBB6    |
| 6.65E-142 | 8 | AIF1     |
| 2.24E-140 | 8 | TSPAN13  |
| 7.55E-140 | 8 | WARS     |
| 1.75E-139 | 8 | BCL11A   |
| 1.08E-138 | 8 | CAPG     |
| 1.38E-136 | 8 | FGD2     |
| 4.16E-136 | 8 | CHAF1A   |
| 5.06E-136 | 8 | IL13RA1  |
| 5.70E-136 | 8 | HVCN1    |
| 2.98E-135 | 8 | AFF3     |
| 6.63E-135 | 8 | AXL      |
| 3.08E-134 | 8 | ARHGAP31 |
| 1.66E-132 | 8 | EMILIN2  |
| 3.20E-132 | 8 | SHTN1    |
| 5.34E-132 | 8 | 1-Mar    |
| 8.61E-132 | 8 | NME2     |
| 5.42E-131 | 8 | RAB32    |
| 2.20E-130 | 8 | CORO1C   |
| 1.77E-129 | 8 | SPECC1   |
| 6.31E-129 | 8 | SMCO4    |

|           |   |           |
|-----------|---|-----------|
| 1.92E-128 | 8 | LILRB4    |
| 5.90E-128 | 8 | CDKN1A    |
| 9.67E-128 | 8 | SLC8A1    |
| 8.15E-127 | 8 | NME4      |
| 3.50E-126 | 8 | PLAC8     |
| 1.48E-125 | 8 | ENPP2     |
| 1.60E-123 | 8 | REL       |
| 2.62E-123 | 8 | GNA15     |
| 9.15E-123 | 8 | RAB11FIP1 |
| 1.68E-122 | 8 | SPRED2    |
| 2.64E-122 | 8 | IGSF6     |
| 6.46E-122 | 8 | PLEKHO1   |
| 4.40E-121 | 8 | PTK2      |
| 4.84E-121 | 8 | ARID3A    |
| 3.64E-120 | 8 | PARVB     |
| 8.74E-120 | 8 | ANKRD33B  |
| 1.44E-119 | 8 | RIPK2     |
| 1.92E-119 | 8 | ETV6      |
| 8.76E-118 | 8 | NPC2      |
| 1.52E-117 | 8 | CALHM6    |
| 2.73E-117 | 8 | MCTP1     |
| 4.86E-117 | 8 | IFNGR2    |
| 7.12E-117 | 8 | PKIG      |
| 8.69E-117 | 8 | FCER1G    |
| 7.16E-116 | 8 | CTBP2     |
| 8.44E-115 | 8 | RNF144B   |
| 4.02E-114 | 8 | PPP1R14B  |
| 4.10E-114 | 8 | IL3RA     |
| 4.27E-114 | 8 | TYMP      |
| 1.64E-113 | 8 | MYO1E     |
| 1.35E-112 | 8 | ZNF710    |
| 1.42E-112 | 8 | TFEC      |
| 1.51E-112 | 8 | STX17-AS1 |
| 1.66E-112 | 8 | ENTPD7    |
| 1.70E-112 | 8 | C15orf48  |
| 2.50E-112 | 8 | FARP2     |
| 3.94E-111 | 8 | MYOF      |
| 6.50E-111 | 8 | TCOF1     |
| 8.53E-111 | 8 | CPVL      |
| 2.39E-110 | 8 | MOB3B     |
| 4.65E-110 | 8 | HLA-DRB5  |
| 6.56E-110 | 8 | DUSP5     |
| 1.57E-109 | 8 | SCIMP     |

|           |   |           |
|-----------|---|-----------|
| 2.05E-109 | 8 | ICAM1     |
| 2.68E-109 | 8 | EIF2AK4   |
| 6.93E-109 | 8 | ALG2      |
| 8.07E-109 | 8 | TRIO      |
| 1.05E-108 | 8 | IRF4      |
| 2.84E-108 | 8 | RUFY3     |
| 3.13E-108 | 8 | TGFBR1    |
| 2.20E-107 | 8 | STX7      |
| 2.79E-107 | 8 | GAS6      |
| 3.04E-107 | 8 | GNB4      |
| 1.29E-106 | 8 | BHLHE40   |
| 8.41E-106 | 8 | TRAF4     |
| 1.10E-105 | 8 | UNC93B1   |
| 1.73E-105 | 8 | PLSCR1    |
| 1.84E-105 | 8 | MS4A6A    |
| 7.09E-105 | 8 | ARPC3     |
| 3.14E-104 | 8 | CTNND1    |
| 3.31E-104 | 8 | DBI       |
| 1.05E-103 | 8 | GABARAP   |
| 1.78E-103 | 8 | VEGFB     |
| 2.10E-103 | 8 | MACC1     |
| 3.19E-103 | 8 | MAN2B1    |
| 3.23E-103 | 8 | CERS6     |
| 7.94E-103 | 8 | PPA1      |
| 3.17E-101 | 8 | DST       |
| 4.85E-101 | 8 | GRINA     |
| 6.85E-101 | 8 | UVRAG     |
| 8.54E-101 | 8 | TSPAN3    |
| 8.58E-101 | 8 | GABARAPL2 |
| 1.48E-100 | 8 | RASSF4    |
| 3.49E-100 | 8 | UBE2F     |
| 4.11E-100 | 8 | SNX3      |
| 2.95E-99  | 8 | DBNL      |
| 6.92E-99  | 8 | ZMIZ1     |
| 1.53E-98  | 8 | CDYL      |
| 1.72E-98  | 8 | MOB3A     |
| 1.03E-97  | 8 | GCA       |
| 6.68E-97  | 8 | GDI2      |
| 9.65E-97  | 8 | MOB1A     |
| 1.33E-96  | 8 | MARCKSL1  |
| 2.80E-96  | 8 | EAF2      |
| 1.56E-95  | 8 | NEK6      |
| 4.41E-95  | 8 | SKAP2     |

|          |   |          |
|----------|---|----------|
| 3.58E-94 | 8 | SNN      |
| 5.02E-94 | 8 | GNG5     |
| 1.56E-93 | 8 | MGST2    |
| 2.64E-93 | 8 | DENND5B  |
| 3.02E-93 | 8 | MGLL     |
| 4.15E-93 | 8 | ALOX5    |
| 2.15E-92 | 8 | CYBA     |
| 7.18E-92 | 8 | BANK1    |
| 2.23E-91 | 8 | PTPN1    |
| 2.92E-91 | 8 | SEL1L3   |
| 4.46E-91 | 8 | CAT      |
| 6.18E-91 | 8 | RP2      |
| 1.40E-90 | 8 | FCGRT    |
| 2.24E-90 | 8 | RASGRP3  |
| 2.64E-90 | 8 | HES4     |
| 9.14E-90 | 8 | CHML     |
| 7.70E-89 | 8 | CNPY3    |
| 9.62E-89 | 8 | UGCG     |
| 9.68E-89 | 8 | SIPA1L3  |
| 1.77E-88 | 8 | AP1S2    |
| 1.94E-88 | 8 | CTSS     |
| 2.23E-88 | 8 | DLGAP4   |
| 2.27E-88 | 8 | ZNF516   |
| 3.43E-88 | 8 | TNFSF13  |
| 4.21E-88 | 8 | RAPGEF1  |
| 4.79E-88 | 8 | REPIN1   |
| 5.36E-88 | 8 | LGMN     |
| 5.77E-88 | 8 | FYTDD1   |
| 9.00E-88 | 8 | BTK      |
| 1.28E-87 | 8 | NUP62    |
| 1.62E-87 | 8 | PGLS     |
| 5.03E-87 | 8 | RALA     |
| 9.61E-87 | 8 | HMGA1    |
| 1.82E-86 | 8 | MCM5     |
| 2.04E-86 | 8 | APP      |
| 2.98E-86 | 8 | GNA12    |
| 5.43E-86 | 8 | SERPINB6 |
| 6.32E-86 | 8 | IFNGR1   |
| 7.46E-86 | 8 | TOR3A    |
| 8.79E-86 | 8 | DBNDD2   |
| 1.92E-85 | 8 | LAT2     |
| 2.63E-85 | 8 | MAP3K8   |
| 4.77E-85 | 8 | ARF3     |



|          |   |            |
|----------|---|------------|
| 5.58E-85 | 8 | VASP       |
| 1.25E-84 | 8 | TENT4A     |
| 2.12E-84 | 8 | FUOM       |
| 2.94E-84 | 8 | SUSD1      |
| 3.78E-84 | 8 | AF117829.1 |
| 2.51E-83 | 8 | ATOX1      |
| 2.54E-83 | 8 | BMP2K      |
| 5.04E-83 | 8 | MOB1B      |
| 1.49E-82 | 8 | AREG       |
| 1.56E-82 | 8 | SEC61B     |
| 5.67E-82 | 8 | APEX1      |
| 8.30E-82 | 8 | GPR137B    |
| 9.24E-82 | 8 | PSME2      |
| 1.66E-81 | 8 | PTRHD1     |
| 2.20E-81 | 8 | MARCKS     |
| 5.46E-81 | 8 | SCO2       |
| 1.23E-80 | 8 | MAP3K13    |
| 3.14E-80 | 8 | RGS19      |
| 4.52E-80 | 8 | ACTB       |
| 5.30E-80 | 8 | CYSTM1     |
| 1.25E-79 | 8 | B3GNT5     |
| 1.31E-79 | 8 | CNDP2      |
| 1.43E-79 | 8 | PDLIM1     |
| 5.44E-78 | 8 | SMIM20     |
| 1.30E-77 | 8 | CDK14      |
| 1.63E-77 | 8 | PLXDC2     |
| 4.29E-77 | 8 | SELENOH    |
| 6.91E-77 | 8 | ARPC5      |
| 7.49E-77 | 8 | ADAM19     |
| 7.73E-77 | 8 | RUBCN      |
| 2.71E-76 | 8 | SINHCAF    |
| 1.04E-75 | 8 | MB21D2     |
| 1.10E-75 | 8 | GALNT3     |
| 1.35E-75 | 8 | SPART      |
| 2.58E-75 | 8 | IRF7       |
| 2.74E-75 | 8 | RAB8B      |
| 3.37E-75 | 8 | TPM3       |
| 5.27E-75 | 8 | KLHL6      |
| 1.29E-74 | 8 | PLIN3      |
| 4.11E-74 | 8 | C17orf49   |
| 4.55E-74 | 8 | HPS5       |
| 7.01E-74 | 8 | CYB561A3   |
| 1.42E-73 | 8 | TNFSF9     |

|          |   |            |
|----------|---|------------|
| 1.56E-73 | 8 | LAP3       |
| 2.14E-73 | 8 | P2RX1      |
| 4.99E-73 | 8 | JADE3      |
| 7.63E-73 | 8 | RNASET2    |
| 8.08E-73 | 8 | SIPA1L1    |
| 8.81E-73 | 8 | TXN        |
| 1.04E-72 | 8 | C1orf162   |
| 1.26E-72 | 8 | EBF1       |
| 1.76E-72 | 8 | GLA        |
| 2.16E-72 | 8 | NUBP1      |
| 2.67E-72 | 8 | FNIP2      |
| 8.00E-72 | 8 | PIKFYVE    |
| 9.82E-72 | 8 | RELT       |
| 1.01E-71 | 8 | TMEM131    |
| 1.37E-71 | 8 | ACAA1      |
| 1.92E-71 | 8 | SNRNP25    |
| 4.41E-71 | 8 | DSE        |
| 4.76E-71 | 8 | GAB2       |
| 9.21E-71 | 8 | SNHG15     |
| 1.34E-70 | 8 | KDM6B      |
| 1.69E-70 | 8 | TMSB10     |
| 1.74E-70 | 8 | RIPOR1     |
| 3.12E-70 | 8 | MEF2A      |
| 3.26E-70 | 8 | AP003086.1 |
| 3.52E-70 | 8 | PRMT9      |
| 4.32E-70 | 8 | NFKB1      |
| 6.74E-70 | 8 | MFSD12     |
| 8.51E-70 | 8 | APPL1      |
| 3.72E-69 | 8 | SUMO3      |
| 4.30E-69 | 8 | DCK        |
| 5.30E-69 | 8 | RHOQ       |
| 7.63E-69 | 8 | GM2A       |
| 8.82E-69 | 8 | EPB41L2    |
| 9.13E-69 | 8 | MIR155HG   |
| 1.16E-68 | 8 | PACSIN2    |
| 1.62E-68 | 8 | AC083837.1 |
| 2.65E-68 | 8 | MANBA      |
| 3.82E-68 | 8 | BCAR3      |
| 6.30E-68 | 8 | TCTN3      |
| 7.77E-68 | 8 | ATP6V0B    |
| 8.54E-68 | 8 | TBC1D8     |
| 1.43E-67 | 8 | TUBB       |
| 2.18E-67 | 8 | GAB1       |

|          |   |            |
|----------|---|------------|
| 3.12E-67 | 8 | POGLUT1    |
| 3.22E-67 | 8 | SERPINB1   |
| 3.29E-67 | 8 | FTH1       |
| 3.31E-67 | 8 | MALT1      |
| 4.03E-67 | 8 | EDEM1      |
| 4.32E-67 | 8 | PIK3AP1    |
| 1.06E-66 | 8 | SH3GL1     |
| 1.20E-66 | 8 | AP2S1      |
| 1.35E-66 | 8 | ADCY3      |
| 1.42E-66 | 8 | AC120193.1 |
| 2.05E-66 | 8 | LYZ        |
| 2.60E-66 | 8 | CEP170     |
| 3.90E-66 | 8 | KBTBD8     |
| 4.25E-66 | 8 | AC004687.1 |
| 5.11E-66 | 8 | KLF10      |
| 5.94E-66 | 8 | N4BP2L1    |
| 6.25E-66 | 8 | PRMT1      |
| 6.98E-66 | 8 | MS4A1      |
| 1.55E-65 | 8 | DUSP22     |
| 1.75E-65 | 8 | MYL12A     |
| 1.95E-65 | 8 | HIVEP1     |
| 2.12E-65 | 8 | CHMP4B     |
| 3.58E-65 | 8 | NQO2       |
| 4.44E-65 | 8 | NAGK       |
| 6.27E-65 | 8 | ZNF433-AS1 |
| 1.19E-64 | 8 | ATP6V0D1   |
| 2.17E-64 | 8 | PFN1       |
| 2.60E-64 | 8 | PTPN6      |
| 2.90E-64 | 8 | SRGAP2     |
| 6.89E-64 | 8 | GOLIM4     |
| 1.10E-63 | 8 | VPS35      |
| 1.71E-63 | 8 | EIF4A1     |
| 1.88E-63 | 8 | GSTP1      |
| 1.95E-63 | 8 | IRF2BP2    |
| 1.96E-63 | 8 | NR4A2      |
| 3.31E-63 | 8 | RNASEK     |
| 3.38E-63 | 8 | ARL5B      |
| 4.86E-63 | 8 | MTPN       |
| 6.90E-63 | 8 | COX5A      |
| 1.00E-62 | 8 | ARPC2      |
| 1.11E-62 | 8 | CLIC1      |
| 1.12E-62 | 8 | FCGR2B     |
| 1.29E-62 | 8 | ATAD2B     |

|          |   |           |
|----------|---|-----------|
| 1.51E-62 | 8 | UBXN2A    |
| 1.58E-62 | 8 | CXXC5     |
| 1.70E-62 | 8 | TET2      |
| 1.81E-62 | 8 | TMSB4X    |
| 1.85E-62 | 8 | SLAMF7    |
| 2.56E-62 | 8 | ADAM28    |
| 3.07E-62 | 8 | CCR7      |
| 3.77E-62 | 8 | SLC25A33  |
| 8.13E-62 | 8 | NINJ1     |
| 1.01E-61 | 8 | SLC66A2   |
| 1.08E-61 | 8 | ENTPD1    |
| 6.05E-61 | 8 | TMEM14C   |
| 7.42E-61 | 8 | DCTPP1    |
| 8.04E-61 | 8 | CLN8      |
| 1.01E-60 | 8 | AKR1A1    |
| 1.04E-60 | 8 | G0S2      |
| 1.35E-60 | 8 | IER5      |
| 1.78E-60 | 8 | RASGEF1B  |
| 2.69E-60 | 8 | RILPL2    |
| 5.01E-60 | 8 | LSP1      |
| 6.06E-60 | 8 | RGS2      |
| 7.18E-60 | 8 | DDX21     |
| 9.27E-60 | 8 | HMGN3     |
| 1.24E-59 | 8 | AFDN      |
| 1.24E-59 | 8 | SIRPA     |
| 1.91E-59 | 8 | H3F3A     |
| 2.11E-59 | 8 | AMZ1      |
| 2.68E-59 | 8 | PPIF      |
| 1.36E-58 | 8 | LACTB     |
| 1.55E-58 | 8 | ST8SIA4   |
| 3.71E-58 | 8 | SLC25A5   |
| 4.22E-58 | 8 | GNAQ      |
| 7.11E-58 | 8 | LAMTOR1   |
| 9.74E-58 | 8 | H2AFY     |
| 1.34E-57 | 8 | BAG1      |
| 1.39E-57 | 8 | FBRSL1    |
| 1.88E-57 | 8 | TRAK1     |
| 2.13E-57 | 8 | YBX1      |
| 2.30E-57 | 8 | UPF2      |
| 2.62E-57 | 8 | EHBP1L1   |
| 2.83E-57 | 8 | SERPINB9  |
| 3.54E-57 | 8 | RALGPS2   |
| 6.08E-57 | 8 | TNFRSF10B |

|          |   |            |
|----------|---|------------|
| 8.30E-57 | 8 | INPP5F     |
| 1.32E-56 | 8 | SOX4       |
| 1.36E-56 | 8 | RELB       |
| 1.92E-56 | 8 | GPX4       |
| 2.40E-56 | 8 | M6PR       |
| 2.59E-56 | 8 | RNF130     |
| 2.65E-56 | 8 | TEX14      |
| 3.10E-56 | 8 | PTMS       |
| 3.35E-56 | 8 | TPM4       |
| 7.08E-56 | 8 | EIF5A      |
| 7.33E-56 | 8 | PYCARD     |
| 7.43E-56 | 8 | ATG3       |
| 8.70E-56 | 8 | TALDO1     |
| 1.09E-55 | 8 | ATP6V1F    |
| 1.28E-55 | 8 | IGFLR1     |
| 1.31E-55 | 8 | OGFRL1     |
| 3.39E-55 | 8 | LYSMD2     |
| 3.64E-55 | 8 | BCAT1      |
| 4.38E-55 | 8 | EEF1G      |
| 4.47E-55 | 8 | ST3GAL5    |
| 4.89E-55 | 8 | COTL1      |
| 5.60E-55 | 8 | ENTPD1-AS1 |
| 6.81E-55 | 8 | YWHAH      |
| 1.94E-54 | 8 | EIF6       |
| 3.40E-54 | 8 | GNA13      |
| 4.70E-54 | 8 | PIM3       |
| 7.21E-54 | 8 | CHPT1      |
| 7.51E-54 | 8 | LAPTM4A    |
| 8.37E-54 | 8 | PUS10      |
| 9.83E-54 | 8 | BLK        |
| 1.20E-53 | 8 | SAT1       |
| 1.62E-53 | 8 | CD2AP      |
| 1.64E-53 | 8 | UBA52      |
| 2.17E-53 | 8 | NCF1       |
| 3.51E-53 | 8 | UST        |
| 5.59E-53 | 8 | POLD4      |
| 7.36E-53 | 8 | RRBP1      |
| 7.43E-53 | 8 | CD72       |
| 8.97E-53 | 8 | TOMM6      |
| 1.12E-52 | 8 | BRI3       |
| 1.19E-52 | 8 | CAPNS1     |
| 1.33E-52 | 8 | RNH1       |
| 1.70E-52 | 8 | CKS2       |

|          |   |          |
|----------|---|----------|
| 1.98E-52 | 8 | ZBTB10   |
| 3.16E-52 | 8 | LGALS1   |
| 3.50E-52 | 8 | ATP6V0E1 |
| 3.61E-52 | 8 | PRKCE    |
| 4.17E-52 | 8 | ARHGAP24 |
| 4.39E-52 | 8 | TMEM39A  |
| 4.43E-52 | 8 | ETS2     |
| 5.02E-52 | 8 | HOOK3    |
| 5.68E-52 | 8 | RAB8A    |
| 5.87E-52 | 8 | C1QBP    |
| 6.76E-52 | 8 | ACTG1    |
| 7.32E-52 | 8 | PFDN2    |
| 8.50E-52 | 8 | ZFHX3    |
| 1.16E-51 | 8 | GPR65    |
| 1.48E-51 | 8 | LAMTOR2  |
| 1.48E-51 | 8 | FGL2     |
| 2.64E-51 | 8 | TNFSF13B |
| 3.00E-51 | 8 | SLC27A4  |
| 7.52E-51 | 8 | PHB2     |
| 1.16E-50 | 8 | RREB1    |
| 1.23E-50 | 8 | ARPC1B   |
| 1.24E-50 | 8 | MAP4K4   |
| 1.40E-50 | 8 | DMXL1    |
| 1.65E-50 | 8 | MICAL3   |
| 1.66E-50 | 8 | INSR     |
| 3.28E-50 | 8 | PHB      |
| 4.04E-50 | 8 | SH3BP5   |
| 4.25E-50 | 8 | AUTS2    |
| 5.76E-50 | 8 | RAC1     |
| 7.62E-50 | 8 | ARHGAP5  |
| 8.80E-50 | 8 | NUB1     |
| 8.98E-50 | 8 | DDT      |
| 9.13E-50 | 8 | PRR13    |
| 1.11E-49 | 8 | VOPP1    |
| 1.39E-49 | 8 | COX17    |
| 1.51E-49 | 8 | RBX1     |
| 2.13E-49 | 8 | HIP1     |
| 2.37E-49 | 8 | PEAK1    |
| 3.02E-49 | 8 | VIM      |
| 4.57E-49 | 8 | PRELID1  |
| 4.58E-49 | 8 | CAP1     |
| 6.06E-49 | 8 | SRGAP2B  |
| 7.63E-49 | 8 | PPIA     |

|          |   |            |
|----------|---|------------|
| 8.42E-49 | 8 | STRBP      |
| 1.13E-48 | 8 | TNFRSF13C  |
| 1.63E-48 | 8 | TRABD      |
| 2.24E-48 | 8 | SLC25A25   |
| 2.35E-48 | 8 | TFEB       |
| 2.54E-48 | 8 | AC008014.1 |
| 2.60E-48 | 8 | SERF2      |
| 3.11E-48 | 8 | SLC25A6    |
| 4.32E-48 | 8 | AC007952.4 |
| 5.42E-48 | 8 | VAV2       |
| 6.32E-48 | 8 | DRAM2      |
| 6.46E-48 | 8 | EIF3L      |
| 7.24E-48 | 8 | GRB2       |
| 1.08E-47 | 8 | GNG10      |
| 1.97E-47 | 8 | SSR3       |
| 3.11E-47 | 8 | LCP1       |
| 1.64E-46 | 8 | CFL1       |
| 1.67E-46 | 8 | SERP1      |
| 2.43E-46 | 8 | IFITM3     |
| 3.17E-46 | 8 | STK38L     |
| 3.37E-46 | 8 | CHCHD10    |
| 3.63E-46 | 8 | PDIA3      |
| 4.03E-46 | 8 | POLB       |
| 1.06E-45 | 8 | PHLDA2     |
| 1.49E-45 | 8 | RASSF5     |
| 3.71E-45 | 8 | PHPT1      |
| 5.37E-45 | 8 | SSR1       |
| 1.05E-44 | 8 | LTB        |
| 1.15E-44 | 8 | CDC37      |
| 1.21E-44 | 8 | PAX5       |
| 1.77E-44 | 8 | TWISTNB    |
| 4.30E-44 | 8 | SLC9A7     |
| 4.49E-44 | 8 | SNX2       |
| 6.77E-44 | 8 | ACTR3      |
| 7.58E-44 | 8 | SCPEP1     |
| 8.36E-44 | 8 | UTP6       |
| 8.98E-44 | 8 | EFHD2      |
| 1.22E-43 | 8 | RFTN1      |
| 1.46E-43 | 8 | CNN2       |
| 1.51E-43 | 8 | ZFAND6     |
| 1.85E-43 | 8 | POMP       |
| 2.20E-43 | 8 | TUBA1B     |
| 2.89E-43 | 8 | RACK1      |

|          |   |             |
|----------|---|-------------|
| 5.00E-43 | 8 | COBLL1      |
| 8.22E-43 | 8 | SGK1        |
| 8.28E-43 | 8 | PALM2-AKAP2 |
| 1.88E-42 | 8 | VAMP8       |
| 1.90E-42 | 8 | CSNK2B      |
| 3.13E-42 | 8 | RHEB        |
| 3.34E-42 | 8 | VDAC2       |
| 3.65E-42 | 8 | VPS29       |
| 4.07E-42 | 8 | PLAGL1      |
| 1.85E-41 | 8 | ATP5F1E     |
| 2.10E-41 | 8 | OAZ1        |
| 3.37E-41 | 8 | NAAA        |
| 3.45E-41 | 8 | TAPBP       |
| 5.47E-41 | 8 | TAP1        |
| 6.32E-41 | 8 | RHBDF2      |
| 6.73E-41 | 8 | RAB5C       |
| 6.85E-41 | 8 | TAGLN2      |
| 8.65E-41 | 8 | ANXA11      |
| 1.13E-40 | 8 | UBE2E1      |
| 1.38E-40 | 8 | UCP2        |
| 1.58E-40 | 8 | PBX3        |
| 1.60E-40 | 8 | ECE1        |
| 1.69E-40 | 8 | ENY2        |
| 1.85E-40 | 8 | MED13L      |
| 2.42E-40 | 8 | PKM         |
| 2.62E-40 | 8 | NGLY1       |
| 2.74E-40 | 8 | PLCG2       |
| 3.27E-40 | 8 | GRSF1       |
| 5.13E-40 | 8 | JAK2        |
| 5.51E-40 | 8 | STAP1       |
| 6.98E-40 | 8 | USP6NL      |
| 8.73E-40 | 8 | IFT57       |
| 9.42E-40 | 8 | MTHFD1L     |
| 1.11E-39 | 8 | GEM         |
| 1.60E-39 | 8 | AC104365.1  |
| 1.65E-39 | 8 | STEAP1B     |
| 1.82E-39 | 8 | PSMA2       |
| 2.14E-39 | 8 | CD22        |
| 2.61E-39 | 8 | ARFGAP3     |
| 4.24E-39 | 8 | MX1         |
| 4.38E-39 | 8 | TAF10       |
| 4.62E-39 | 8 | ORAI2       |
| 6.02E-39 | 8 | ARPC4       |



|          |   |            |
|----------|---|------------|
| 8.33E-39 | 8 | INSIG1     |
| 9.47E-39 | 8 | CD79A      |
| 1.92E-38 | 8 | RBBP8      |
| 2.62E-38 | 8 | OTUD1      |
| 2.81E-38 | 8 | MKINK2     |
| 3.40E-38 | 8 | OSTC       |
| 4.22E-38 | 8 | PLEKHG1    |
| 5.31E-38 | 8 | ATP5MF     |
| 6.46E-38 | 8 | BRK1       |
| 9.10E-38 | 8 | SUB1       |
| 9.87E-38 | 8 | BCL2L11    |
| 1.10E-37 | 8 | BCL2L13    |
| 1.18E-37 | 8 | FAU        |
| 5.39E-37 | 8 | HIGD2A     |
| 6.18E-37 | 8 | PIIB       |
| 8.05E-37 | 8 | CDC42      |
| 1.04E-36 | 8 | LAPTM5     |
| 1.45E-36 | 8 | DENND1B    |
| 3.15E-36 | 8 | PSMB3      |
| 3.87E-36 | 8 | CCDC138    |
| 4.02E-36 | 8 | GNAI2      |
| 4.41E-36 | 8 | UBE2A      |
| 4.89E-36 | 8 | CD109      |
| 7.32E-36 | 8 | C12orf75   |
| 8.97E-36 | 8 | SRP14      |
| 1.49E-35 | 8 | ACTR2      |
| 1.83E-35 | 8 | FHIT       |
| 2.14E-35 | 8 | RBM3       |
| 2.45E-35 | 8 | MYO9B      |
| 3.50E-35 | 8 | DRAP1      |
| 4.07E-35 | 8 | PDE4A      |
| 4.08E-35 | 8 | MIR181A1HG |
| 7.49E-35 | 8 | COX6B1     |
| 1.22E-34 | 8 | ACSL3      |
| 1.35E-34 | 8 | RTN4       |
| 1.53E-34 | 8 | SQSTM1     |
| 2.35E-34 | 8 | CLEC16A    |
| 2.56E-34 | 8 | POU2F2     |
| 2.87E-34 | 8 | CYSLTR1    |
| 3.41E-34 | 8 | SLC20A1    |
| 4.56E-34 | 8 | OXR1       |
| 4.58E-34 | 8 | TBCA       |
| 4.77E-34 | 8 | HMG1       |

|          |   |            |
|----------|---|------------|
| 6.48E-34 | 8 | CHCHD2     |
| 8.11E-34 | 8 | HINT1      |
| 1.15E-33 | 8 | TACC1      |
| 1.22E-33 | 8 | NBDY       |
| 1.32E-33 | 8 | CCT8       |
| 3.42E-33 | 8 | ACER3      |
| 3.69E-33 | 8 | NIN        |
| 3.76E-33 | 8 | MYL6       |
| 7.70E-33 | 8 | USP12      |
| 8.24E-33 | 8 | SMDT1      |
| 1.01E-32 | 8 | NAPA       |
| 1.18E-32 | 8 | EZR        |
| 2.06E-32 | 8 | RHOA       |
| 2.37E-32 | 8 | AC253572.2 |
| 6.78E-32 | 8 | PSME1      |
| 1.10E-31 | 8 | MTHFD2     |
| 1.70E-31 | 8 | CPNE3      |
| 1.93E-31 | 8 | SET        |
| 2.67E-31 | 8 | SEC61G     |
| 3.46E-31 | 8 | TXNRD1     |
| 5.21E-31 | 8 | CLINT1     |
| 5.57E-31 | 8 | ATP5F1B    |
| 9.82E-31 | 8 | ANXA6      |
| 9.98E-31 | 8 | LSM7       |
| 1.01E-30 | 8 | SPCS1      |
| 1.11E-30 | 8 | CALR       |
| 1.24E-30 | 8 | PTPRE      |
| 1.26E-30 | 8 | GPSM3      |
| 1.45E-30 | 8 | ERP29      |
| 2.65E-30 | 8 | CD164      |
| 3.04E-30 | 8 | EEF1B2     |
| 4.08E-30 | 8 | PRDX6      |
| 8.71E-30 | 8 | BST2       |
| 9.88E-30 | 8 | ATP5MC3    |
| 1.14E-29 | 8 | ITSN2      |
| 2.19E-29 | 8 | EEF1A1     |
| 3.54E-29 | 8 | GNL3       |
| 4.54E-29 | 8 | ANKRD11    |
| 4.96E-29 | 8 | UQCRH      |
| 6.43E-29 | 8 | PPT1       |
| 8.76E-29 | 8 | PARK7      |
| 9.58E-29 | 8 | VRK2       |
| 1.11E-28 | 8 | IFI44L     |

|          |   |          |
|----------|---|----------|
| 1.72E-28 | 8 | NACA     |
| 1.88E-28 | 8 | WDFY2    |
| 2.08E-28 | 8 | COX6A1   |
| 2.20E-28 | 8 | SELENOS  |
| 5.14E-28 | 8 | METRNL   |
| 5.38E-28 | 8 | RGS10    |
| 9.95E-28 | 8 | PFKFB3   |
| 1.16E-27 | 8 | PDLIM5   |
| 1.64E-27 | 8 | ZFAS1    |
| 2.18E-27 | 8 | PSMB9    |
| 2.97E-27 | 8 | SNHG29   |
| 3.33E-27 | 8 | DSTN     |
| 3.40E-27 | 8 | PFDN5    |
| 8.42E-27 | 8 | BZW1     |
| 6.81E-26 | 8 | ANKRD13A |
| 9.90E-26 | 8 | JAML     |
| 1.37E-25 | 8 | REV3L    |
| 2.11E-25 | 8 | ATP6V1G1 |
| 2.59E-25 | 8 | STMN1    |
| 3.85E-25 | 8 | TPI1     |
| 8.13E-25 | 8 | ENO1     |
| 1.15E-24 | 8 | CHMP1B   |
| 1.53E-24 | 8 | NFAT5    |
| 2.19E-24 | 8 | SMC6     |
| 2.40E-24 | 8 | FAM210A  |
| 5.09E-24 | 8 | RAB7A    |
| 6.52E-24 | 8 | TIMP1    |
| 6.64E-24 | 8 | SP110    |
| 7.67E-24 | 8 | MYL12B   |
| 9.83E-24 | 8 | GADD45B  |
| 3.70E-23 | 8 | ABTB2    |
| 5.12E-23 | 8 | LPXN     |
| 5.36E-23 | 8 | ARL6IP5  |
| 8.72E-23 | 8 | LRRFIP1  |
| 1.12E-22 | 8 | COX4I1   |
| 1.52E-22 | 8 | INPP5A   |
| 1.69E-22 | 8 | OSBPL10  |
| 2.10E-22 | 8 | NFATC1   |
| 6.45E-21 | 8 | EMP3     |
| 6.71E-21 | 8 | PIK3R5   |
| 8.34E-21 | 8 | SMG1     |
| 2.16E-20 | 8 | CORO7    |
| 2.89E-20 | 8 | MCL1     |

|             |   |          |
|-------------|---|----------|
| 3.46E-20    | 8 | ANXA2    |
| 9.74E-20    | 8 | ZFAND2A  |
| 2.52E-19    | 8 | SSBP2    |
| 2.85E-19    | 8 | FBXO34   |
| 6.10E-19    | 8 | HIVEP3   |
| 6.84E-19    | 8 | XYLT1    |
| 8.60E-19    | 8 | YWHAZ    |
| 9.87E-19    | 8 | MAN1A1   |
| 1.29E-18    | 8 | HERPUD1  |
| 1.32E-18    | 8 | LRCH3    |
| 1.80E-18    | 8 | CD37     |
| 3.05E-18    | 8 | ATP2C1   |
| 3.09E-18    | 8 | S100A11  |
| 7.16E-18    | 8 | SLC44A1  |
| 7.38E-18    | 8 | ERICH1   |
| 1.22E-17    | 8 | DENND4A  |
| 1.82E-17    | 8 | USP24    |
| 1.87E-17    | 8 | CD79B    |
| 2.62E-17    | 8 | LY9      |
| 2.80E-16    | 8 | ISG15    |
| 3.85E-16    | 8 | JARID2   |
| 6.00E-16    | 8 | SETBP1   |
| 6.32E-16    | 8 | LARGE1   |
| 4.32E-15    | 8 | ITGB2    |
| 9.61E-15    | 8 | COMMMD10 |
| 3.79E-14    | 8 | CFLAR    |
| 1.50E-13    | 8 | ARHGAP10 |
| 1.74E-13    | 8 | ZFAND5   |
| 6.26E-13    | 8 | ALOX5AP  |
| 1.46E-12    | 8 | MTSS1    |
| 1.73E-12    | 8 | S100A10  |
| 2.99E-12    | 8 | RANBP2   |
| 3.67E-12    | 8 | AKAP13   |
| 3.80E-12    | 8 | ITM2C    |
| 1.68E-11    | 8 | HIPK2    |
| 1.10E-10    | 8 | TRAF1    |
| 6.21E-10    | 8 | PARP15   |
| 1.32E-09    | 8 | HIST1H1C |
| 1.78E-08    | 8 | S100A6   |
| 5.30E-07    | 8 | ZNF331   |
| 0.000149101 | 8 | BAG3     |
| 0.00362845  | 8 | CD52     |
| 0.017696786 | 8 | LDHA     |

|           |   |            |
|-----------|---|------------|
| 1         | 8 | BIRC3      |
| 1         | 8 | ARL4C      |
| 1         | 8 | ID2        |
| 1         | 8 | INPP4A     |
| 0         | 9 | BANK1      |
| 0         | 9 | ARHGAP24   |
| 0         | 9 | MS4A1      |
| 0         | 9 | BLK        |
| 0         | 9 | LINC01781  |
| 0         | 9 | C12orf74   |
| 2.53E-281 | 9 | TNFRSF13C  |
| 6.38E-244 | 9 | CD79A      |
| 8.19E-242 | 9 | TNFRSF13B  |
| 2.56E-234 | 9 | GNG7       |
| 1.08E-229 | 9 | EBF1       |
| 1.07E-211 | 9 | ADAM28     |
| 1.73E-209 | 9 | MEF2C      |
| 6.25E-206 | 9 | SSPN       |
| 1.03E-204 | 9 | AFF3       |
| 5.91E-197 | 9 | HLA-DRA    |
| 1.15E-191 | 9 | OSBPL10    |
| 5.39E-184 | 9 | CD74       |
| 8.90E-174 | 9 | SWAP70     |
| 4.82E-156 | 9 | CD24       |
| 1.03E-155 | 9 | RALGPS2    |
| 8.47E-153 | 9 | CD37       |
| 1.61E-144 | 9 | LINC00926  |
| 6.00E-139 | 9 | HLA-DQA1   |
| 2.54E-129 | 9 | VPREB3     |
| 1.96E-122 | 9 | 1-Mar      |
| 9.97E-121 | 9 | HLA-DPB1   |
| 1.23E-120 | 9 | HLA-DRB5   |
| 1.51E-116 | 9 | LYN        |
| 2.62E-111 | 9 | HLA-DQB1   |
| 7.70E-110 | 9 | AC120193.1 |
| 5.83E-107 | 9 | LARGE1     |
| 1.07E-106 | 9 | WDFY4      |
| 3.23E-106 | 9 | EEF1B2     |
| 2.67E-104 | 9 | PAX5       |
| 8.03E-104 | 9 | CD83       |
| 5.47E-103 | 9 | HLA-DQA2   |
| 4.69E-102 | 9 | EZR        |
| 1.93E-101 | 9 | SNED1      |

|           |   |            |
|-----------|---|------------|
| 5.45E-100 | 9 | SCIMP      |
| 6.87E-100 | 9 | IRF8       |
| 1.22E-99  | 9 | HLA-DRB1   |
| 6.90E-98  | 9 | LY86       |
| 1.21E-94  | 9 | COBLL1     |
| 8.38E-92  | 9 | HLA-DPA1   |
| 4.24E-91  | 9 | LINC02397  |
| 1.24E-90  | 9 | SMIM14     |
| 3.99E-90  | 9 | LY9        |
| 1.82E-89  | 9 | ZFAS1      |
| 1.01E-87  | 9 | CHPT1      |
| 1.31E-84  | 9 | PLEKHG1    |
| 2.09E-84  | 9 | EEF1A1     |
| 5.17E-81  | 9 | IFT57      |
| 1.03E-80  | 9 | PDLIM1     |
| 3.73E-80  | 9 | JADE3      |
| 7.42E-79  | 9 | EEF1G      |
| 2.83E-77  | 9 | LAPTM5     |
| 4.10E-77  | 9 | FAM49A     |
| 5.01E-76  | 9 | FAU        |
| 3.60E-75  | 9 | AC119396.1 |
| 6.00E-75  | 9 | ST6GAL1    |
| 4.54E-74  | 9 | POU2F2     |
| 7.32E-71  | 9 | MGAT5      |
| 1.12E-70  | 9 | SETBP1     |
| 1.16E-70  | 9 | SNX2       |
| 1.56E-70  | 9 | GRASP      |
| 1.05E-69  | 9 | HIPK2      |
| 4.78E-66  | 9 | PKIG       |
| 3.65E-65  | 9 | TRIO       |
| 1.43E-64  | 9 | INPP5A     |
| 5.38E-64  | 9 | TLE1       |
| 3.78E-63  | 9 | P2RX5      |
| 2.16E-60  | 9 | CARMIL1    |
| 2.53E-60  | 9 | WEE1       |
| 1.23E-59  | 9 | GAS5       |
| 1.85E-59  | 9 | SEL1L3     |
| 2.43E-59  | 9 | CD55       |
| 1.08E-58  | 9 | KYNU       |
| 3.45E-58  | 9 | ANKRD44    |
| 2.20E-57  | 9 | NIBAN3     |
| 9.37E-56  | 9 | FCRL1      |
| 1.14E-55  | 9 | POU2AF1    |

|          |   |          |
|----------|---|----------|
| 1.65E-55 | 9 | HLA-DMA  |
| 6.04E-54 | 9 | ORAI2    |
| 1.17E-53 | 9 | CD79B    |
| 1.30E-53 | 9 | UBA52    |
| 1.57E-53 | 9 | BCAS4    |
| 3.90E-52 | 9 | SIPA1L1  |
| 9.26E-52 | 9 | NCOA3    |
| 6.44E-51 | 9 | PRDM2    |
| 8.26E-51 | 9 | MICAL3   |
| 1.69E-50 | 9 | C12orf42 |
| 9.48E-50 | 9 | BCL11A   |
| 1.86E-49 | 9 | BASP1    |
| 4.44E-49 | 9 | PLCG2    |
| 9.32E-49 | 9 | DENND5B  |
| 1.20E-48 | 9 | CDK14    |
| 2.65E-48 | 9 | MGMT     |
| 3.02E-48 | 9 | MARCKS   |
| 3.22E-48 | 9 | TPT1     |
| 9.07E-48 | 9 | NACA     |
| 6.52E-46 | 9 | PFDN5    |
| 7.58E-45 | 9 | DRAM2    |
| 4.58E-43 | 9 | BACH2    |
| 1.51E-42 | 9 | BTG1     |
| 7.45E-42 | 9 | TCF4     |
| 6.10E-41 | 9 | NOP53    |
| 7.39E-41 | 9 | EIF1     |
| 4.42E-40 | 9 | TFEB     |
| 5.16E-40 | 9 | ANKRD13A |
| 3.62E-39 | 9 | USP6NL   |
| 6.40E-39 | 9 | SLC25A6  |
| 2.13E-38 | 9 | TSC22D3  |
| 5.30E-38 | 9 | SMAP2    |
| 1.15E-37 | 9 | RACK1    |
| 1.85E-37 | 9 | HLA-DMB  |
| 2.79E-37 | 9 | PRKCB    |
| 9.92E-37 | 9 | TOMM7    |
| 4.09E-36 | 9 | EEF2     |
| 4.63E-36 | 9 | UVRAG    |
| 6.76E-36 | 9 | CCDC50   |
| 1.12E-35 | 9 | CXCR4    |
| 3.21E-35 | 9 | RCSD1    |
| 5.78E-35 | 9 | BMP2K    |
| 7.38E-35 | 9 | IL13RA1  |

|          |   |          |
|----------|---|----------|
| 8.14E-34 | 9 | CD40     |
| 5.72E-33 | 9 | PTMA     |
| 8.71E-33 | 9 | SAMD4A   |
| 3.07E-32 | 9 | KLF2     |
| 3.56E-32 | 9 | MAP4K4   |
| 4.49E-31 | 9 | AP1S3    |
| 5.78E-31 | 9 | INPP5D   |
| 7.95E-31 | 9 | FCMR     |
| 1.68E-30 | 9 | UST      |
| 2.23E-30 | 9 | UBE2E2   |
| 3.50E-30 | 9 | CHCHD10  |
| 7.30E-30 | 9 | TAF4B    |
| 1.17E-29 | 9 | WASHC4   |
| 9.16E-29 | 9 | SESN3    |
| 1.06E-28 | 9 | CCSER1   |
| 1.46E-28 | 9 | CD22     |
| 2.12E-28 | 9 | PDE7A    |
| 2.31E-27 | 9 | SNX8     |
| 6.24E-27 | 9 | SFMBT1   |
| 2.32E-26 | 9 | MALAT1   |
| 2.81E-26 | 9 | GSAP     |
| 2.91E-26 | 9 | TMEM243  |
| 2.51E-25 | 9 | PTK2     |
| 3.06E-25 | 9 | TMEM131  |
| 3.50E-25 | 9 | HERPUD1  |
| 2.13E-24 | 9 | RNASET2  |
| 2.78E-24 | 9 | TRAK1    |
| 3.08E-24 | 9 | PHF20    |
| 3.97E-24 | 9 | TXNIP    |
| 4.58E-24 | 9 | ARHGEF18 |
| 7.72E-24 | 9 | GRK3     |
| 9.01E-24 | 9 | NIN      |
| 1.40E-23 | 9 | MARCKSL1 |
| 6.06E-23 | 9 | TP53INP1 |
| 6.66E-23 | 9 | ATP2B1   |
| 9.73E-23 | 9 | CD52     |
| 1.11E-22 | 9 | BTF3     |
| 1.16E-22 | 9 | DENND4A  |
| 1.45E-22 | 9 | SSH2     |
| 1.59E-22 | 9 | LTB      |
| 2.18E-22 | 9 | ZBTB20   |
| 3.44E-22 | 9 | EIF1AY   |
| 1.25E-21 | 9 | RGS19    |



|          |   |            |
|----------|---|------------|
| 1.76E-21 | 9 | YWHAZ      |
| 1.81E-21 | 9 | NFKBID     |
| 2.17E-21 | 9 | SLC44A2    |
| 1.38E-20 | 9 | SYPL1      |
| 1.14E-19 | 9 | CCR7       |
| 1.56E-19 | 9 | MEF2A      |
| 2.64E-19 | 9 | EHMT1      |
| 3.13E-19 | 9 | DAPP1      |
| 3.37E-19 | 9 | ZHX2       |
| 3.66E-19 | 9 | PABPC1     |
| 3.85E-19 | 9 | SKIL       |
| 4.96E-19 | 9 | OAZ1       |
| 9.40E-19 | 9 | PARVB      |
| 1.06E-18 | 9 | SNHG29     |
| 1.58E-18 | 9 | SMARCB1    |
| 4.06E-18 | 9 | TCOF1      |
| 5.06E-18 | 9 | FCHSD2     |
| 7.90E-18 | 9 | MAPK8IP3   |
| 1.04E-17 | 9 | SMDT1      |
| 2.08E-17 | 9 | CMTM6      |
| 2.65E-17 | 9 | STRBP      |
| 3.08E-17 | 9 | REL        |
| 4.15E-17 | 9 | KMT2E      |
| 7.71E-17 | 9 | CTSH       |
| 8.64E-17 | 9 | AP000787.1 |
| 8.85E-17 | 9 | RHBDF2     |
| 1.01E-16 | 9 | RAB11FIP1  |
| 1.39E-16 | 9 | FARP2      |
| 1.58E-16 | 9 | RBM39      |
| 1.91E-16 | 9 | TBC1D5     |
| 3.65E-16 | 9 | MYO1D      |
| 1.11E-15 | 9 | SNHG6      |
| 1.13E-15 | 9 | ARID5B     |
| 1.25E-15 | 9 | RB1        |
| 3.31E-15 | 9 | TPD52      |
| 4.74E-15 | 9 | SKAP2      |
| 6.01E-15 | 9 | PIKFYVE    |
| 1.34E-14 | 9 | NPM1       |
| 2.38E-14 | 9 | RUBCNL     |
| 2.83E-14 | 9 | CD48       |
| 4.24E-14 | 9 | LIMD2      |
| 4.54E-14 | 9 | ATP2A3     |
| 6.85E-14 | 9 | PRDM4      |

|          |   |         |
|----------|---|---------|
| 7.79E-14 | 9 | MTSS1   |
| 8.18E-14 | 9 | KLHL5   |
| 1.40E-13 | 9 | GRK5    |
| 1.70E-13 | 9 | RAB11A  |
| 1.86E-13 | 9 | SP100   |
| 1.86E-13 | 9 | ZDHHC14 |
| 4.45E-13 | 9 | UPF2    |
| 5.66E-13 | 9 | LGMN    |
| 6.15E-13 | 9 | PARP15  |
| 7.27E-13 | 9 | SYK     |
| 9.35E-13 | 9 | IMMP2L  |
| 1.04E-12 | 9 | UTY     |
| 1.10E-12 | 9 | LSM7    |
| 1.41E-12 | 9 | ARRDC2  |
| 1.47E-12 | 9 | MYCBP2  |
| 2.30E-12 | 9 | CCNI    |
| 3.73E-12 | 9 | SNHG8   |
| 5.41E-12 | 9 | SINHCAF |
| 6.66E-12 | 9 | EEF1D   |
| 6.91E-12 | 9 | ARPC3   |
| 8.14E-12 | 9 | LAT2    |
| 1.06E-11 | 9 | PDE4D   |
| 1.22E-11 | 9 | TNRC6B  |
| 1.89E-11 | 9 | TMEM156 |
| 2.64E-11 | 9 | UBE2I   |
| 3.50E-11 | 9 | DAAM1   |
| 5.41E-11 | 9 | TBXAS1  |
| 5.74E-11 | 9 | USP34   |
| 5.92E-11 | 9 | EIF3E   |
| 8.02E-11 | 9 | EIF4A2  |
| 1.40E-10 | 9 | RFX3    |
| 1.99E-10 | 9 | ELMO1   |
| 4.46E-10 | 9 | CD53    |
| 5.98E-10 | 9 | CAMK1D  |
| 7.94E-10 | 9 | NUP88   |
| 1.48E-09 | 9 | THEMIS2 |
| 1.55E-09 | 9 | NDUFAF6 |
| 1.85E-09 | 9 | LMO4    |
| 1.86E-09 | 9 | SNHG5   |
| 2.22E-09 | 9 | RAPGEF1 |
| 2.43E-09 | 9 | TUT4    |
| 2.94E-09 | 9 | OTUD1   |
| 3.97E-09 | 9 | ATF4    |

|          |   |             |
|----------|---|-------------|
| 4.79E-09 | 9 | MIDN        |
| 5.03E-09 | 9 | TMEM154     |
| 7.37E-09 | 9 | CD82        |
| 9.11E-09 | 9 | BICD1       |
| 1.66E-08 | 9 | RFX1        |
| 2.01E-08 | 9 | CIRBP       |
| 2.06E-08 | 9 | ATF7IP2     |
| 2.24E-08 | 9 | THUMPD3-AS1 |
| 2.44E-08 | 9 | CHD7        |
| 2.89E-08 | 9 | ITPR1       |
| 3.26E-08 | 9 | NAP1L1      |
| 3.47E-08 | 9 | VASP        |
| 3.48E-08 | 9 | TCEA1       |
| 3.82E-08 | 9 | RERE        |
| 4.32E-08 | 9 | SEPTIN9     |
| 5.25E-08 | 9 | HIST1H4C    |
| 7.27E-08 | 9 | CCND3       |
| 8.10E-08 | 9 | ZFP36L2     |
| 8.13E-08 | 9 | RUBCN       |
| 8.46E-08 | 9 | ITSN2       |
| 9.28E-08 | 9 | TAF1D       |
| 9.92E-08 | 9 | SERP1       |
| 1.04E-07 | 9 | RASGRP2     |
| 1.07E-07 | 9 | DENND3      |
| 1.19E-07 | 9 | FAM102A     |
| 1.19E-07 | 9 | SH2B3       |
| 1.19E-07 | 9 | COX4I1      |
| 1.23E-07 | 9 | GNA12       |
| 1.46E-07 | 9 | RASGEF1B    |
| 1.61E-07 | 9 | CALM2       |
| 1.64E-07 | 9 | COMMD6      |
| 1.70E-07 | 9 | RILPL2      |
| 2.31E-07 | 9 | MOB3A       |
| 2.56E-07 | 9 | FUS         |
| 2.75E-07 | 9 | SRSF3       |
| 2.97E-07 | 9 | MOB1A       |
| 4.12E-07 | 9 | RAB30       |
| 4.23E-07 | 9 | STK17A      |
| 4.92E-07 | 9 | ARID1B      |
| 5.18E-07 | 9 | SP110       |
| 6.34E-07 | 9 | SNHG7       |
| 6.82E-07 | 9 | SNHG32      |
| 8.11E-07 | 9 | UQCRH       |

|          |   |            |
|----------|---|------------|
| 1.08E-06 | 9 | ERP29      |
| 1.11E-06 | 9 | MIR29B2CHG |
| 1.24E-06 | 9 | AC092821.3 |
| 1.25E-06 | 9 | ZFP36L1    |
| 1.76E-06 | 9 | HSH2D      |
| 1.81E-06 | 9 | ZFAND6     |
| 1.92E-06 | 9 | SREBF2     |
| 2.29E-06 | 9 | SIPA1L3    |
| 2.65E-06 | 9 | NR4A2      |
| 2.81E-06 | 9 | CRIP1      |
| 3.16E-06 | 9 | CNPY3      |
| 3.20E-06 | 9 | CCDC97     |
| 3.43E-06 | 9 | AP001011.1 |
| 3.67E-06 | 9 | SRRM2      |
| 4.61E-06 | 9 | USP8       |
| 5.07E-06 | 9 | SMC6       |
| 5.18E-06 | 9 | REV3L      |
| 5.58E-06 | 9 | IDS        |
| 5.60E-06 | 9 | UXT        |
| 5.86E-06 | 9 | RBFOX2     |
| 6.86E-06 | 9 | VOPP1      |
| 6.87E-06 | 9 | SLC49A4    |
| 8.15E-06 | 9 | INTS6      |
| 9.44E-06 | 9 | TGFB1      |
| 1.07E-05 | 9 | KDM6B      |
| 1.12E-05 | 9 | MIS18BP1   |
| 1.41E-05 | 9 | TRIR       |
| 1.63E-05 | 9 | TRAF5      |
| 1.66E-05 | 9 | SYS1       |
| 2.61E-05 | 9 | DUSP1      |
| 2.92E-05 | 9 | SQSTM1     |
| 2.96E-05 | 9 | UBB        |
| 3.45E-05 | 9 | SRGAP2     |
| 3.63E-05 | 9 | BACH1      |
| 4.02E-05 | 9 | HNRNPA1    |
| 4.19E-05 | 9 | EIF5       |
| 4.80E-05 | 9 | C7orf50    |
| 5.23E-05 | 9 | STX7       |
| 6.30E-05 | 9 | EIF2S3     |
| 6.46E-05 | 9 | ERC1       |
| 7.25E-05 | 9 | NRF1       |
| 7.35E-05 | 9 | SNX25      |
| 9.62E-05 | 9 | RABEP1     |

|             |   |              |
|-------------|---|--------------|
| 0.000114302 | 9 | H3F3B        |
| 0.000118842 | 9 | IRAK2        |
| 0.000120898 | 9 | RBM38        |
| 0.000134926 | 9 | MKNK2        |
| 0.000138572 | 9 | LPIN1        |
| 0.000147026 | 9 | FNBP1        |
| 0.000201483 | 9 | EIF3F        |
| 0.000219332 | 9 | TRIM38       |
| 0.000313077 | 9 | SNX29        |
| 0.000434795 | 9 | MICU2        |
| 0.000523429 | 9 | SMG1         |
| 0.000580191 | 9 | OOEP         |
| 0.000742788 | 9 | FAM13B       |
| 0.000752043 | 9 | CNTRL        |
| 0.000873316 | 9 | NASP         |
| 0.001088704 | 9 | SNU13        |
| 0.001097254 | 9 | TUBA1A       |
| 0.001273822 | 9 | IER5         |
| 0.001416778 | 9 | YPEL5        |
| 0.001814832 | 9 | EPB41L4A-AS1 |
| 0.002031391 | 9 | AFTPH        |
| 0.002068919 | 9 | ADGRE5       |
| 0.002421618 | 9 | UBE2N        |
| 0.003319244 | 9 | NR1H2        |
| 0.003345137 | 9 | NCF1         |
| 0.003447785 | 9 | RAB3GAP1     |
| 0.004117115 | 9 | ANKRD37      |
| 0.005697697 | 9 | RIPOR2       |
| 0.005727135 | 9 | RBM3         |
| 0.006014479 | 9 | RPA2         |
| 0.006591656 | 9 | 8-Mar        |
| 0.007144233 | 9 | SERTAD1      |
| 0.009710344 | 9 | RAD51B       |
| 0.009734375 | 9 | PWP1         |
| 0.010512393 | 9 | ABHD15-AS1   |
| 0.010918479 | 9 | KLHL6        |
| 0.011742298 | 9 | TUBA1B       |
| 0.011896296 | 9 | COX7C        |
| 0.012007775 | 9 | USP9Y        |
| 0.012776861 | 9 | MTFR1        |
| 0.013250098 | 9 | SF1          |
| 0.016181911 | 9 | ZCCHC10      |
| 0.023711267 | 9 | EIF3H        |

|             |   |            |
|-------------|---|------------|
| 0.032501129 | 9 | TOMM20     |
| 0.034893867 | 9 | RBM6       |
| 0.037887349 | 9 | SYNGR2     |
| 0.041063211 | 9 | SNHG12     |
| 0.04503573  | 9 | ODC1       |
| 0.047189461 | 9 | TAGLN2     |
| 0.055678363 | 9 | PAN3       |
| 0.058136893 | 9 | ATM        |
| 0.067560845 | 9 | RUFY1      |
| 0.076868235 | 9 | SP140      |
| 0.082073764 | 9 | EIF1B      |
| 0.087996652 | 9 | ZNF506     |
| 0.090807804 | 9 | DDX21      |
| 0.090815085 | 9 | BBX        |
| 0.098437136 | 9 | HMGN1      |
| 0.098485903 | 9 | UBXN1      |
| 0.126142203 | 9 | SAP18      |
| 0.139648884 | 9 | KDM4C      |
| 0.15366649  | 9 | DANCR      |
| 0.164690114 | 9 | PARP14     |
| 0.179734396 | 9 | ALG13      |
| 0.203958022 | 9 | OSER1      |
| 0.22029166  | 9 | AC245297.3 |
| 0.222119738 | 9 | RHOQ       |
| 0.245698304 | 9 | PLP2       |
| 0.250617194 | 9 | CLIC4      |
| 0.255677387 | 9 | RHBDD1     |
| 0.267433102 | 9 | BRD2       |
| 0.268453826 | 9 | TRIM44     |
| 0.280195003 | 9 | CEP170     |
| 0.280822544 | 9 | DGKD       |
| 0.281199942 | 9 | MBD4       |
| 0.287291527 | 9 | TAF7       |
| 0.329215633 | 9 | SPOP       |
| 0.362101797 | 9 | NSA2       |
| 0.481648546 | 9 | SPIDR      |
| 0.489654458 | 9 | PRMT1      |
| 0.50719425  | 9 | BPTF       |
| 0.661498891 | 9 | IFNGR2     |
| 0.785661683 | 9 | PVT1       |
| 0.835988572 | 9 | RBM23      |
| 0.861696082 | 9 | IGHM       |
| 0.893781164 | 9 | SRPK2      |

|             |   |             |
|-------------|---|-------------|
| 0.989117665 | 9 | SFPQ        |
| 1           | 9 | AP1B1       |
| 1           | 9 | CHD9        |
| 1           | 9 | POLD4       |
| 1           | 9 | MECP2       |
| 1           | 9 | DDIT3       |
| 1           | 9 | ZBTB44      |
| 1           | 9 | STAG1       |
| 1           | 9 | CYSTM1      |
| 1           | 9 | SERTAD2     |
| 1           | 9 | CORO1A      |
| 1           | 9 | PCF11       |
| 1           | 9 | PCBP2       |
| 1           | 9 | 6-Mar       |
| 1           | 9 | RSRC2       |
| 1           | 9 | ZCCHC7      |
| 1           | 9 | IDI1        |
| 1           | 9 | PATJ        |
| 1           | 9 | STIM2       |
| 1           | 9 | GTF2H1      |
| 1           | 9 | SHOC2       |
| 1           | 9 | ATF7IP      |
| 1           | 9 | PPIG        |
| 1           | 9 | CKS2        |
| 1           | 9 | TMEM131L    |
| 1           | 9 | XKR6        |
| 1           | 9 | KDM3B       |
| 1           | 9 | COMMD10     |
| 1           | 9 | ARHGAP45    |
| 1           | 9 | RBM26       |
| 1           | 9 | EEA1        |
| 1           | 9 | MTPN        |
| 1           | 9 | PHKB        |
| 1           | 9 | WSB1        |
| 1           | 9 | FBL         |
| 1           | 9 | RBM25       |
| 1           | 9 | ZNF24       |
| 1           | 9 | PARP1       |
| 1           | 9 | PALM2-AKAP2 |
| 1           | 9 | KLHL24      |
| 1           | 9 | ST13        |
| 1           | 9 | WAC         |
| 1           | 9 | KLHL18      |

|   |   |         |
|---|---|---------|
| 1 | 9 | HDAC1   |
| 1 | 9 | SCAF8   |
| 1 | 9 | MTMR6   |
| 1 | 9 | MAP3K1  |
| 1 | 9 | TRAPPC8 |
| 1 | 9 | EIF4B   |
| 1 | 9 | EIF3L   |
| 1 | 9 | IL16    |
| 1 | 9 | TUBB4B  |
| 1 | 9 | SYF2    |
| 1 | 9 | VTI1A   |
| 1 | 9 | ATP5MC2 |
| 1 | 9 | SRSF2   |
| 1 | 9 | NR1D2   |
| 1 | 9 | PHB2    |
| 1 | 9 | CDK13   |
| 1 | 9 | CD47    |
| 1 | 9 | SIRT1   |
| 1 | 9 | SNX3    |
| 1 | 9 | CSNK1D  |
| 1 | 9 | SP140L  |
| 1 | 9 | BANF1   |
| 1 | 9 | KDM4B   |
| 1 | 9 | GNB5    |
| 1 | 9 | UBE2S   |
| 1 | 9 | RNPS1   |
| 1 | 9 | DYNLL1  |
| 1 | 9 | CLASP2  |
| 1 | 9 | PTPN6   |
| 1 | 9 | WIPF2   |
| 1 | 9 | HPS5    |
| 1 | 9 | PIAS1   |
| 1 | 9 | NFATC1  |
| 1 | 9 | BOD1L1  |
| 1 | 9 | TMX4    |
| 1 | 9 | EPC2    |
| 1 | 9 | TTC17   |
| 1 | 9 | FAM133B |
| 1 | 9 | ATP5PO  |
| 1 | 9 | DMXL1   |
| 1 | 9 | GDI2    |
| 1 | 9 | PPP3CA  |
| 1 | 9 | SH3BP5  |



|           |    |            |
|-----------|----|------------|
| 1         | 9  | TMEM65     |
| 1         | 9  | RSL24D1    |
| 1         | 9  | CD2AP      |
| 1         | 9  | KRT10      |
| 1         | 9  | LRIF1      |
| 1         | 9  | EIF3D      |
| 1         | 9  | CD69       |
| 1         | 9  | TBC1D22A   |
| 1         | 9  | P4HA1      |
| 1         | 9  | RNMT       |
| 1         | 9  | BCL2L11    |
| 0         | 10 | IL1R2      |
| 0         | 10 | AQP9       |
| 0         | 10 | NAMPT      |
| 0         | 10 | CXCL8      |
| 0         | 10 | ACSL1      |
| 0         | 10 | PLAUR      |
| 0         | 10 | KCNJ15     |
| 0         | 10 | FGD4       |
| 0         | 10 | IRAK3      |
| 0         | 10 | CSF3R      |
| 0         | 10 | SOD2       |
| 0         | 10 | DOCK4      |
| 0         | 10 | G0S2       |
| 0         | 10 | AC007271.1 |
| 0         | 10 | TREM1      |
| 0         | 10 | ADGRG3     |
| 0         | 10 | AC005050.3 |
| 0         | 10 | SLC11A1    |
| 0         | 10 | TNFAIP6    |
| 0         | 10 | NEAT1      |
| 3.08E-303 | 10 | LIMK2      |
| 2.12E-298 | 10 | DENND5A    |
| 1.66E-290 | 10 | LCP2       |
| 6.68E-280 | 10 | PLEK       |
| 1.51E-279 | 10 | S100A8     |
| 1.32E-275 | 10 | RBM47      |
| 1.78E-264 | 10 | LUCAT1     |
| 1.11E-261 | 10 | LITAF      |
| 3.12E-256 | 10 | RNF149     |
| 1.04E-251 | 10 | IL1RAP     |
| 1.28E-244 | 10 | ARHGAP26   |
| 1.49E-243 | 10 | BASP1      |

|           |    |              |
|-----------|----|--------------|
| 2.41E-239 | 10 | S100A9       |
| 1.26E-236 | 10 | BCL2A1       |
| 1.24E-230 | 10 | WDFY3        |
| 4.22E-220 | 10 | SLC25A37     |
| 4.93E-214 | 10 | PTGS2        |
| 3.77E-206 | 10 | AZIN1-AS1    |
| 7.51E-205 | 10 | CD55         |
| 3.09E-202 | 10 | FPR1         |
| 6.56E-202 | 10 | CPD          |
| 1.02E-196 | 10 | GK           |
| 1.71E-189 | 10 | TMCC3        |
| 2.25E-189 | 10 | HCK          |
| 1.11E-188 | 10 | SLC8A1       |
| 2.07E-187 | 10 | SAMSN1       |
| 1.37E-178 | 10 | AL078604.4   |
| 3.15E-178 | 10 | IL1B         |
| 9.12E-168 | 10 | MXD1         |
| 5.01E-157 | 10 | ETS2         |
| 3.44E-152 | 10 | PLXDC2       |
| 1.71E-147 | 10 | ADAMTSL4-AS1 |
| 8.75E-147 | 10 | TLR2         |
| 7.30E-146 | 10 | C5AR1        |
| 1.50E-145 | 10 | NCF2         |
| 5.20E-144 | 10 | IVNS1ABP     |
| 4.23E-143 | 10 | ITGAX        |
| 6.68E-139 | 10 | PDE4B        |
| 1.71E-132 | 10 | SRGN         |
| 2.20E-130 | 10 | DOCK5        |
| 5.59E-125 | 10 | MCTP1        |
| 4.50E-111 | 10 | IGF1R        |
| 7.76E-110 | 10 | FNDC3B       |
| 1.40E-108 | 10 | PELI1        |
| 2.05E-107 | 10 | IL1R1        |
| 5.96E-102 | 10 | USP32        |
| 1.26E-96  | 10 | IER3         |
| 1.90E-93  | 10 | LYN          |
| 1.20E-91  | 10 | CREB5        |
| 2.89E-91  | 10 | NEDD9        |
| 3.66E-90  | 10 | GAB2         |
| 3.87E-88  | 10 | RABGEF1      |
| 4.69E-83  | 10 | FCGR2A       |
| 7.53E-82  | 10 | PHACTR1      |
| 1.63E-72  | 10 | BCL6         |

|          |    |            |
|----------|----|------------|
| 3.93E-72 | 10 | GLUL       |
| 5.26E-70 | 10 | ICAM1      |
| 3.53E-68 | 10 | IRS2       |
| 9.59E-68 | 10 | ELL2       |
| 2.98E-64 | 10 | FAM49B     |
| 4.30E-64 | 10 | FTH1       |
| 3.46E-62 | 10 | SVIL       |
| 2.66E-58 | 10 | MAML3      |
| 2.56E-57 | 10 | PGS1       |
| 2.59E-57 | 10 | ST6GALNAC3 |
| 7.93E-57 | 10 | AC099489.1 |
| 3.95E-56 | 10 | SAT1       |
| 4.29E-54 | 10 | C9orf72    |
| 3.94E-53 | 10 | ELF2       |
| 1.59E-52 | 10 | TOM1       |
| 1.35E-51 | 10 | RAB31      |
| 3.21E-49 | 10 | RNF144B    |
| 1.95E-48 | 10 | ALOX5AP    |
| 5.91E-47 | 10 | PTPRE      |
| 3.52E-46 | 10 | B3GNT5     |
| 1.30E-45 | 10 | MCTP2      |
| 1.47E-45 | 10 | DDX60L     |
| 2.53E-45 | 10 | ANKRD17    |
| 4.89E-45 | 10 | SIPA1L1    |
| 1.75E-44 | 10 | BABAM2     |
| 2.87E-44 | 10 | KDM6A      |
| 4.71E-44 | 10 | ELOVL5     |
| 1.01E-41 | 10 | CPQ        |
| 3.34E-41 | 10 | PILRA      |
| 1.60E-40 | 10 | ABHD5      |
| 3.62E-40 | 10 | LAMTOR4    |
| 3.68E-40 | 10 | TYROBP     |
| 4.64E-40 | 10 | COPA       |
| 2.24E-39 | 10 | RESF1      |
| 3.44E-39 | 10 | PTPN12     |
| 7.08E-39 | 10 | PTEN       |
| 1.33E-38 | 10 | ROCK1      |
| 2.48E-37 | 10 | SP3        |
| 4.56E-37 | 10 | NUMB       |
| 5.34E-37 | 10 | USP3       |
| 8.70E-37 | 10 | BRAF       |
| 4.86E-36 | 10 | ERBIN      |
| 1.05E-35 | 10 | TRIP12     |

|          |    |            |
|----------|----|------------|
| 3.05E-35 | 10 | SBF2       |
| 3.19E-35 | 10 | FCER1G     |
| 3.60E-35 | 10 | TBC1D8     |
| 6.99E-35 | 10 | FOXO3      |
| 7.31E-35 | 10 | PLXNC1     |
| 2.51E-34 | 10 | PAFAH1B1   |
| 3.54E-34 | 10 | PKN2       |
| 5.59E-34 | 10 | FBXW7      |
| 1.22E-33 | 10 | MAPK1      |
| 1.67E-33 | 10 | EP300      |
| 2.37E-33 | 10 | CD46       |
| 3.12E-33 | 10 | GNAQ       |
| 7.88E-33 | 10 | HMGB2      |
| 9.85E-33 | 10 | FBXO11     |
| 1.03E-32 | 10 | SPAG9      |
| 1.12E-32 | 10 | ZNF407     |
| 1.45E-32 | 10 | LCP1       |
| 4.66E-32 | 10 | ZNF438     |
| 6.46E-31 | 10 | AP2B1      |
| 1.18E-30 | 10 | DYRK1A     |
| 1.23E-30 | 10 | LSP1       |
| 1.69E-30 | 10 | HECA       |
| 1.93E-30 | 10 | FOXK2      |
| 3.59E-30 | 10 | DAZAP2     |
| 8.58E-30 | 10 | GABARAPL2  |
| 1.24E-29 | 10 | CAPZB      |
| 2.13E-29 | 10 | RASA2      |
| 3.89E-29 | 10 | AC016831.7 |
| 4.94E-29 | 10 | TLE4       |
| 8.68E-29 | 10 | RB1CC1     |
| 1.10E-28 | 10 | UBAP1      |
| 1.75E-28 | 10 | DDX21      |
| 1.82E-28 | 10 | TAOK3      |
| 2.05E-28 | 10 | N4BP1      |
| 2.10E-28 | 10 | SDCBP      |
| 2.11E-28 | 10 | ACTR2      |
| 3.44E-28 | 10 | RUNX1      |
| 9.38E-28 | 10 | ANXA11     |
| 2.47E-27 | 10 | TOP1       |
| 3.36E-27 | 10 | SEMA4D     |
| 4.52E-27 | 10 | VPS13B     |
| 5.72E-27 | 10 | WSB1       |
| 1.05E-26 | 10 | DOCK11     |

|          |    |         |
|----------|----|---------|
| 1.66E-26 | 10 | PPP2R2A |
| 3.19E-26 | 10 | TAOK1   |
| 4.46E-26 | 10 | UTY     |
| 7.23E-26 | 10 | RAB5C   |
| 9.49E-26 | 10 | WDR26   |
| 1.36E-25 | 10 | CSNK1A1 |
| 1.38E-25 | 10 | CYFIP2  |
| 1.66E-25 | 10 | RB1     |
| 3.04E-25 | 10 | RNASEK  |
| 4.21E-25 | 10 | RAB1A   |
| 7.64E-25 | 10 | CHMP2A  |
| 9.00E-25 | 10 | EVI2B   |
| 9.42E-25 | 10 | XPO6    |
| 1.07E-24 | 10 | ST3GAL1 |
| 1.10E-24 | 10 | KMT2C   |
| 1.17E-24 | 10 | ETV6    |
| 1.22E-24 | 10 | PHF20L1 |
| 1.48E-24 | 10 | PTBP3   |
| 2.56E-24 | 10 | MPP7    |
| 3.78E-24 | 10 | USPL1   |
| 4.14E-24 | 10 | ZFAND3  |
| 5.64E-24 | 10 | CYSTM1  |
| 1.55E-23 | 10 | ADIPOR2 |
| 1.58E-23 | 10 | STAT3   |
| 2.08E-23 | 10 | DOCK2   |
| 6.28E-23 | 10 | ATF6    |
| 6.64E-23 | 10 | AFF4    |
| 7.17E-23 | 10 | GCA     |
| 1.11E-22 | 10 | RIPOR2  |
| 1.54E-22 | 10 | RELB    |
| 1.61E-22 | 10 | FMNL1   |
| 1.68E-22 | 10 | RLF     |
| 1.74E-22 | 10 | USP9X   |
| 1.98E-22 | 10 | ESCO1   |
| 2.39E-22 | 10 | METTL9  |
| 2.84E-22 | 10 | BTBD7   |
| 4.72E-22 | 10 | BCAS3   |
| 5.83E-22 | 10 | NFE2L2  |
| 6.13E-22 | 10 | ATP6V0C |
| 6.14E-22 | 10 | ACAP2   |
| 7.08E-22 | 10 | LBR     |
| 7.11E-22 | 10 | CD44    |
| 7.35E-22 | 10 | OSBPL9  |

|          |    |           |
|----------|----|-----------|
| 7.92E-22 | 10 | RUBCNL    |
| 8.83E-22 | 10 | MAML2     |
| 1.53E-21 | 10 | ZFP36L1   |
| 2.25E-21 | 10 | NCOA1     |
| 2.67E-21 | 10 | CNN2      |
| 3.52E-21 | 10 | PIAS1     |
| 6.04E-21 | 10 | SNRK      |
| 1.10E-20 | 10 | ARID4B    |
| 2.59E-20 | 10 | TBC1D15   |
| 3.61E-20 | 10 | MAPRE1    |
| 4.85E-20 | 10 | CCNL1     |
| 1.17E-19 | 10 | GSK3B     |
| 1.26E-19 | 10 | MAP3K2    |
| 1.66E-19 | 10 | CHMP2B    |
| 2.06E-19 | 10 | PPP1R18   |
| 2.61E-19 | 10 | GBP5      |
| 2.79E-19 | 10 | TAGLN2    |
| 6.95E-19 | 10 | H2AFY     |
| 7.27E-19 | 10 | GSTO1     |
| 8.50E-19 | 10 | SSH2      |
| 1.40E-18 | 10 | JARID2    |
| 1.44E-18 | 10 | CWC25     |
| 1.50E-18 | 10 | TBXAS1    |
| 1.76E-18 | 10 | DNTTIP2   |
| 2.16E-18 | 10 | TSG101    |
| 2.27E-18 | 10 | ANKRD11   |
| 2.87E-18 | 10 | CSNK1D    |
| 2.97E-18 | 10 | ATP6V1H   |
| 4.10E-18 | 10 | RAB7A     |
| 4.20E-18 | 10 | NCOA2     |
| 4.62E-18 | 10 | RALGDS    |
| 6.21E-18 | 10 | CELF2     |
| 1.45E-17 | 10 | AGFG1     |
| 2.10E-17 | 10 | PCBP1-AS1 |
| 2.22E-17 | 10 | TAGAP     |
| 2.58E-17 | 10 | GPR132    |
| 3.10E-17 | 10 | VPS26A    |
| 3.47E-17 | 10 | TXN       |
| 4.66E-17 | 10 | ECHDC1    |
| 5.17E-17 | 10 | CSTB      |
| 5.21E-17 | 10 | NOL10     |
| 6.11E-17 | 10 | TSC22D2   |
| 9.52E-17 | 10 | CTNBL1    |

|          |    |           |
|----------|----|-----------|
| 1.18E-16 | 10 | CAPZA2    |
| 1.40E-16 | 10 | FAM172A   |
| 1.68E-16 | 10 | TKT       |
| 2.28E-16 | 10 | IRAK2     |
| 3.42E-16 | 10 | HIVEP2    |
| 5.81E-16 | 10 | CAP1      |
| 6.82E-16 | 10 | TRAK1     |
| 9.72E-16 | 10 | DOCK8     |
| 4.17E-15 | 10 | SHOC2     |
| 4.31E-15 | 10 | MIDN      |
| 5.01E-15 | 10 | SCLT1     |
| 6.82E-15 | 10 | ASAH1     |
| 7.97E-15 | 10 | WWP2      |
| 8.93E-15 | 10 | SYNE1     |
| 1.06E-14 | 10 | PLCG2     |
| 1.14E-14 | 10 | GNB2      |
| 1.16E-14 | 10 | NUP58     |
| 1.99E-14 | 10 | MAP1LC3B  |
| 2.57E-14 | 10 | GNA13     |
| 3.18E-14 | 10 | MEF2D     |
| 4.03E-14 | 10 | KDM4B     |
| 4.79E-14 | 10 | DDX3Y     |
| 5.09E-14 | 10 | SELL      |
| 5.23E-14 | 10 | FLOT1     |
| 6.23E-14 | 10 | SLC12A6   |
| 9.21E-14 | 10 | TXNDC11   |
| 1.19E-13 | 10 | RASSF5    |
| 1.24E-13 | 10 | CCDC93    |
| 1.46E-13 | 10 | ATP6V0B   |
| 1.51E-13 | 10 | NAPA      |
| 2.63E-13 | 10 | PFKFB3    |
| 3.51E-13 | 10 | JMJD6     |
| 3.52E-13 | 10 | DENND1A   |
| 3.53E-13 | 10 | AHCTF1    |
| 3.56E-13 | 10 | LGALS3    |
| 4.00E-13 | 10 | NRDC      |
| 4.04E-13 | 10 | TPM3      |
| 5.15E-13 | 10 | NFKB1     |
| 5.86E-13 | 10 | EXT1      |
| 7.53E-13 | 10 | USP4      |
| 9.12E-13 | 10 | TBC1D1    |
| 1.23E-12 | 10 | GABARAPL1 |
| 1.29E-12 | 10 | APBB1IP   |

|          |    |          |
|----------|----|----------|
| 1.56E-12 | 10 | SOS2     |
| 2.06E-12 | 10 | GPCPD1   |
| 2.17E-12 | 10 | RNF19B   |
| 2.74E-12 | 10 | RLIM     |
| 3.17E-12 | 10 | RILPL2   |
| 3.68E-12 | 10 | IRF1     |
| 4.57E-12 | 10 | ARHGAP15 |
| 8.07E-12 | 10 | BAZ1A    |
| 1.16E-11 | 10 | CHST11   |
| 1.62E-11 | 10 | SRGAP2   |
| 1.72E-11 | 10 | PTK2B    |
| 2.15E-11 | 10 | ZFC3H1   |
| 2.83E-11 | 10 | GTPBP1   |
| 3.21E-11 | 10 | ILRUN    |
| 3.34E-11 | 10 | TES      |
| 4.05E-11 | 10 | SDCCAG8  |
| 4.05E-11 | 10 | PPFIA1   |
| 5.02E-11 | 10 | IFRD1    |
| 5.66E-11 | 10 | HCLS1    |
| 7.07E-11 | 10 | GNAI3    |
| 1.16E-10 | 10 | ATP6V1D  |
| 1.31E-10 | 10 | NFKBIZ   |
| 1.48E-10 | 10 | PNRC1    |
| 1.49E-10 | 10 | STK10    |
| 2.75E-10 | 10 | GABARAP  |
| 3.49E-10 | 10 | FTL      |
| 4.16E-10 | 10 | CREBBP   |
| 4.36E-10 | 10 | PPP1R15B |
| 5.18E-10 | 10 | PAK1     |
| 5.49E-10 | 10 | NDRG1    |
| 5.62E-10 | 10 | PPP3CA   |
| 7.28E-10 | 10 | ARFGAP3  |
| 7.35E-10 | 10 | MARCKS   |
| 7.61E-10 | 10 | UBE2H    |
| 8.80E-10 | 10 | SUPT6H   |
| 9.97E-10 | 10 | GRB2     |
| 1.08E-09 | 10 | GTF2H1   |
| 1.28E-09 | 10 | ARIH1    |
| 1.71E-09 | 10 | RAB8B    |
| 1.75E-09 | 10 | TNIP1    |
| 2.04E-09 | 10 | FOXP1    |
| 2.65E-09 | 10 | AP1G1    |
| 2.65E-09 | 10 | NDEL1    |



|          |    |          |
|----------|----|----------|
| 2.79E-09 | 10 | S100A11  |
| 4.08E-09 | 10 | SPATA13  |
| 4.17E-09 | 10 | PLEKHB2  |
| 7.23E-09 | 10 | EFHD2    |
| 8.41E-09 | 10 | CSRNP1   |
| 1.09E-08 | 10 | USP10    |
| 1.39E-08 | 10 | NSMCE2   |
| 1.80E-08 | 10 | CLTC     |
| 2.33E-08 | 10 | RAPGEF2  |
| 2.53E-08 | 10 | NABP1    |
| 2.56E-08 | 10 | ZSWIM6   |
| 2.89E-08 | 10 | WTAP     |
| 3.16E-08 | 10 | USP15    |
| 4.83E-08 | 10 | DSE      |
| 5.45E-08 | 10 | TALDO1   |
| 7.06E-08 | 10 | HIPK3    |
| 8.43E-08 | 10 | SRPK2    |
| 9.68E-08 | 10 | PDXK     |
| 1.52E-07 | 10 | FAM126B  |
| 1.57E-07 | 10 | MAPK14   |
| 1.87E-07 | 10 | OXSRI    |
| 2.81E-07 | 10 | MAP4K4   |
| 3.56E-07 | 10 | CD58     |
| 3.76E-07 | 10 | FBXO34   |
| 3.78E-07 | 10 | CREBRF   |
| 3.92E-07 | 10 | TRAF3IP3 |
| 4.45E-07 | 10 | YTHDF3   |
| 4.69E-07 | 10 | TUT7     |
| 5.05E-07 | 10 | MAPKAPK2 |
| 5.88E-07 | 10 | UBE2E1   |
| 8.05E-07 | 10 | NFAT5    |
| 8.06E-07 | 10 | NPTN     |
| 8.22E-07 | 10 | HIVEP1   |
| 1.12E-06 | 10 | VSIR     |
| 1.38E-06 | 10 | MGAT1    |
| 2.27E-06 | 10 | JOSD1    |
| 3.14E-06 | 10 | LAPTM5   |
| 3.18E-06 | 10 | IQGAP1   |
| 3.18E-06 | 10 | PNPLA8   |
| 4.48E-06 | 10 | RAB27A   |
| 4.62E-06 | 10 | KIAA0232 |
| 4.94E-06 | 10 | HIF1A    |
| 5.21E-06 | 10 | PSEN1    |

|             |    |            |
|-------------|----|------------|
| 6.14E-06    | 10 | LIMS1      |
| 7.18E-06    | 10 | RNF13      |
| 9.17E-06    | 10 | SORL1      |
| 1.11E-05    | 10 | ENSA       |
| 1.25E-05    | 10 | CHD1       |
| 1.52E-05    | 10 | ADAM17     |
| 2.10E-05    | 10 | ARPC5      |
| 2.34E-05    | 10 | RTN4       |
| 2.74E-05    | 10 | GPR65      |
| 2.87E-05    | 10 | EIF4G3     |
| 3.23E-05    | 10 | ACTR3      |
| 3.45E-05    | 10 | SUSD6      |
| 4.56E-05    | 10 | GCH1       |
| 4.94E-05    | 10 | MAPK6      |
| 5.72E-05    | 10 | ZNF267     |
| 6.93E-05    | 10 | SLC2A3     |
| 0.000141334 | 10 | B4GALT5    |
| 0.000165177 | 10 | PPP1CB     |
| 0.000348091 | 10 | PHF21A     |
| 0.000397681 | 10 | BNIP3L     |
| 0.00044998  | 10 | CD53       |
| 0.00055967  | 10 | PREX1      |
| 0.000597829 | 10 | QKI        |
| 0.000896162 | 10 | RAB21      |
| 0.001118764 | 10 | UBE2B      |
| 0.001468049 | 10 | MED13L     |
| 0.002559768 | 10 | RTN3       |
| 0.00265452  | 10 | LAMP1      |
| 0.002785822 | 10 | CASP4      |
| 0.004733822 | 10 | IL4R       |
| 0.005495827 | 10 | HNRNPC     |
| 0.007111559 | 10 | PLSCR1     |
| 0.007566434 | 10 | PDZD8      |
| 0.008362142 | 10 | MTMR3      |
| 0.01258027  | 10 | DIP2B      |
| 0.015471745 | 10 | CSGALNACT2 |
| 0.016311118 | 10 | PSAP       |
| 0.017278571 | 10 | SRPK1      |
| 0.021658636 | 10 | SGK1       |
| 0.022771793 | 10 | PPP4R2     |
| 0.026829293 | 10 | PICALM     |
| 0.029679926 | 10 | ATP11B     |
| 0.040307085 | 10 | ITM2B      |

|             |    |          |
|-------------|----|----------|
| 0.043404366 | 10 | UBE2W    |
| 0.046030479 | 10 | PCNX1    |
| 0.0467966   | 10 | HPCAL1   |
| 0.069768091 | 10 | SLC16A3  |
| 0.085307421 | 10 | COP1     |
| 0.129747778 | 10 | RALGAPA2 |
| 0.150330993 | 10 | TANK     |
| 0.174360565 | 10 | KLHL2    |
| 0.205953249 | 10 | TNFAIP3  |
| 0.214024627 | 10 | UBE2D1   |
| 0.21658366  | 10 | SH3BP5   |
| 0.239860967 | 10 | NUP98    |
| 0.278960927 | 10 | FAM49A   |
| 0.584661085 | 10 | ELMO1    |
| 0.800103333 | 10 | DNM2     |
| 0.96914087  | 10 | RAB5A    |
| 1           | 10 | RYBP     |
| 1           | 10 | MAP3K8   |
| 1           | 10 | VPS37B   |
| 1           | 10 | KIF1B    |
| 1           | 10 | CEP170   |
| 1           | 10 | AGTPBP1  |
| 1           | 10 | ATP13A3  |
| 1           | 10 | NSMAF    |
| 1           | 10 | TNFRSF1B |
| 1           | 10 | ATG7     |
| 1           | 10 | MCL1     |
| 1           | 10 | S100A6   |
| 1           | 10 | TBL1X    |
| 1           | 10 | POR      |
| 1           | 10 | MYO9B    |
| 1           | 10 | GNB1     |
| 1           | 10 | VMP1     |
| 1           | 10 | PACSIN2  |
| 1           | 10 | DPYD     |
| 1           | 10 | ATP6V0D1 |
| 1           | 10 | CMTM6    |
| 1           | 10 | CAMK1D   |
| 1           | 10 | MAP2K3   |
| 1           | 10 | APLP2    |
| 1           | 10 | TBK1     |
| 1           | 10 | CTSS     |
| 1           | 10 | STX11    |

|   |    |            |
|---|----|------------|
| 1 | 10 | IFITM2     |
| 1 | 10 | PRKDC      |
| 1 | 10 | AZIN1      |
| 1 | 10 | RASSF3     |
| 1 | 10 | ERN1       |
| 1 | 10 | BAZ2B      |
| 1 | 10 | ETF1       |
| 1 | 10 | PTPRJ      |
| 1 | 10 | CDC42EP3   |
| 1 | 10 | AC020916.1 |
| 1 | 10 | CCNH       |
| 1 | 10 | ATG3       |
| 1 | 10 | UBE2R2     |
| 1 | 10 | SKIL       |
| 1 | 10 | GTDC1      |
| 1 | 10 | ATP2B1     |
| 0 | 11 | PRPSAP2    |
| 0 | 11 | RAPGEF5    |
| 0 | 11 | AC023590.1 |
| 0 | 11 | RGS13      |
| 0 | 11 | TCL1A      |
| 0 | 11 | LMO2       |
| 0 | 11 | CD22       |
| 0 | 11 | NEIL1      |
| 0 | 11 | BCL7A      |
| 0 | 11 | ZNF608     |
| 0 | 11 | CCDC144A   |
| 0 | 11 | AFF2       |
| 0 | 11 | SUGCT      |
| 0 | 11 | MEF2B      |
| 0 | 11 | MYBL1      |
| 0 | 11 | FGD6       |
| 0 | 11 | IGF2BP3    |
| 0 | 11 | POU2AF1    |
| 0 | 11 | PDGFD      |
| 0 | 11 | PEG10      |
| 0 | 11 | AC104170.1 |
| 0 | 11 | LINC02576  |
| 0 | 11 | MME        |
| 0 | 11 | KIAA1211   |
| 0 | 11 | CFAP299    |
| 0 | 11 | DTX1       |
| 0 | 11 | HRK        |

|           |    |            |
|-----------|----|------------|
| 0         | 11 | DMD        |
| 0         | 11 | NUGGC      |
| 0         | 11 | SERPINA9   |
| 0         | 11 | EML6       |
| 0         | 11 | MIR3681HG  |
| 0         | 11 | KLHL14     |
| 0         | 11 | AC119673.2 |
| 0         | 11 | GCSAM      |
| 0         | 11 | MYBL2      |
| 0         | 11 | ARHGAP44   |
| 0         | 11 | AC079163.2 |
| 0         | 11 | TCL6       |
| 0         | 11 | TRIM55     |
| 0         | 11 | ACY3       |
| 0         | 11 | AC016168.2 |
| 0         | 11 | VNN2       |
| 0         | 11 | LINC01991  |
| 0         | 11 | AC112196.1 |
| 0         | 11 | LOXL2      |
| 0         | 11 | PEX5       |
| 0         | 11 | SYBU       |
| 0         | 11 | FAM81A     |
| 0         | 11 | AICDA      |
| 0         | 11 | ELL3       |
| 0         | 11 | CDCA7      |
| 0         | 11 | ASAP3      |
| 0         | 11 | AL132996.1 |
| 0         | 11 | HTR3A      |
| 0         | 11 | ASB13      |
| 1.92E-296 | 11 | RASSF6     |
| 2.12E-296 | 11 | SLC2A5     |
| 4.38E-294 | 11 | BIK        |
| 8.40E-293 | 11 | CDCA2      |
| 3.38E-285 | 11 | A4GALT     |
| 5.57E-268 | 11 | PAX5       |
| 6.90E-267 | 11 | MND1       |
| 2.61E-265 | 11 | LINC00877  |
| 8.11E-264 | 11 | CPNE5      |
| 4.41E-262 | 11 | LINC01857  |
| 2.99E-258 | 11 | RNFT2      |
| 1.64E-257 | 11 | FAM106A    |
| 1.46E-256 | 11 | BLK        |
| 3.57E-254 | 11 | GALNT14    |

|           |    |            |
|-----------|----|------------|
| 4.70E-249 | 11 | S1PR2      |
| 1.11E-244 | 11 | DCAF12     |
| 2.98E-240 | 11 | STAP1      |
| 1.94E-238 | 11 | CNR2       |
| 1.91E-232 | 11 | MTA3       |
| 1.84E-230 | 11 | TMED8      |
| 1.52E-227 | 11 | PTK2       |
| 1.84E-226 | 11 | HHEX       |
| 3.97E-226 | 11 | P2RX5      |
| 1.17E-224 | 11 | SOX5       |
| 3.57E-224 | 11 | SHCBP1     |
| 1.65E-223 | 11 | CXCR5      |
| 3.21E-223 | 11 | CD79B      |
| 7.51E-223 | 11 | MYO1E      |
| 7.97E-222 | 11 | MS4A1      |
| 1.12E-220 | 11 | FCRLA      |
| 3.66E-219 | 11 | LRMP       |
| 2.20E-217 | 11 | CD19       |
| 3.21E-216 | 11 | OGG1       |
| 1.33E-215 | 11 | VPREB3     |
| 1.06E-212 | 11 | BCAS4      |
| 2.46E-211 | 11 | AC022167.3 |
| 6.25E-210 | 11 | EBF1       |
| 3.04E-205 | 11 | PCLAF      |
| 3.74E-204 | 11 | SPATS2     |
| 5.20E-204 | 11 | COBLL1     |
| 3.81E-202 | 11 | CR2        |
| 3.09E-201 | 11 | KCNH8      |
| 2.85E-200 | 11 | E2F5       |
| 5.02E-199 | 11 | SCIMP      |
| 1.72E-195 | 11 | GCNT2      |
| 2.22E-195 | 11 | LYPLAL1    |
| 6.57E-192 | 11 | IRF8       |
| 2.91E-190 | 11 | CNR1       |
| 3.34E-186 | 11 | IFNLR1     |
| 1.67E-181 | 11 | LRRK1      |
| 4.89E-181 | 11 | MEF2C      |
| 7.54E-181 | 11 | SH3RF1     |
| 1.19E-179 | 11 | PNOC       |
| 6.37E-178 | 11 | TERF2      |
| 2.04E-177 | 11 | SMIM14     |
| 2.65E-173 | 11 | FANCA      |
| 2.91E-173 | 11 | BASP1      |

|           |    |            |
|-----------|----|------------|
| 7.86E-173 | 11 | WDR66      |
| 6.64E-171 | 11 | LHFPL6     |
| 8.05E-171 | 11 | AC011447.3 |
| 1.25E-170 | 11 | RAB30      |
| 2.10E-170 | 11 | SWAP70     |
| 6.29E-169 | 11 | BCL11A     |
| 3.57E-168 | 11 | PRDM15     |
| 3.31E-167 | 11 | CCDC88A    |
| 8.88E-167 | 11 | SEL1L3     |
| 1.43E-166 | 11 | TPD52      |
| 4.05E-166 | 11 | CD40       |
| 7.42E-165 | 11 | MACROD2    |
| 1.39E-161 | 11 | CD79A      |
| 2.79E-161 | 11 | FCRL1      |
| 3.58E-161 | 11 | USP6NL     |
| 1.53E-160 | 11 | STAG3      |
| 1.66E-160 | 11 | CD180      |
| 8.13E-160 | 11 | PLCG2      |
| 2.66E-156 | 11 | DEF8       |
| 3.96E-156 | 11 | BLNK       |
| 2.42E-155 | 11 | SLC1A1     |
| 8.85E-155 | 11 | MBD4       |
| 7.52E-153 | 11 | CLIC4      |
| 1.16E-152 | 11 | HLA-DMB    |
| 5.73E-152 | 11 | SLC30A4    |
| 1.67E-150 | 11 | SYVN1      |
| 4.02E-150 | 11 | AC012236.1 |
| 1.68E-149 | 11 | ZFAND4     |
| 2.06E-149 | 11 | LINC02340  |
| 2.77E-147 | 11 | ANKRD13A   |
| 4.95E-147 | 11 | ANKRD33B   |
| 8.23E-147 | 11 | OSBPL10    |
| 1.16E-146 | 11 | CTPS2      |
| 1.59E-146 | 11 | KANK1      |
| 5.07E-146 | 11 | AC022182.1 |
| 9.04E-146 | 11 | HLA-DOB    |
| 1.11E-145 | 11 | RASL11A    |
| 6.77E-145 | 11 | ST6GAL1    |
| 1.06E-143 | 11 | BRI3BP     |
| 5.06E-143 | 11 | TUBB3      |
| 8.31E-143 | 11 | MAPK10     |
| 4.86E-142 | 11 | EEPD1      |
| 5.83E-142 | 11 | SMIM20     |

|           |    |            |
|-----------|----|------------|
| 2.07E-140 | 11 | WDFY4      |
| 8.73E-140 | 11 | MARCKSL1   |
| 2.79E-139 | 11 | MCTP2      |
| 3.42E-139 | 11 | EAF2       |
| 1.05E-137 | 11 | LILRB1     |
| 3.24E-137 | 11 | KNL1       |
| 5.95E-136 | 11 | SPRED2     |
| 6.67E-136 | 11 | SNX22      |
| 3.53E-133 | 11 | COL9A3     |
| 4.37E-133 | 11 | AFF3       |
| 3.16E-132 | 11 | TMEM156    |
| 9.69E-130 | 11 | CDK19      |
| 1.36E-129 | 11 | TNFRSF13C  |
| 3.93E-128 | 11 | ZNF775     |
| 4.28E-128 | 11 | BFSP2      |
| 3.20E-127 | 11 | GEN1       |
| 4.57E-127 | 11 | EHMT1      |
| 7.37E-127 | 11 | UBE2J1     |
| 1.28E-126 | 11 | SAMD12     |
| 1.89E-125 | 11 | SPAG16     |
| 3.71E-125 | 11 | RUBCNL     |
| 8.61E-125 | 11 | C12orf74   |
| 5.21E-124 | 11 | SLC15A4    |
| 2.40E-123 | 11 | PRAG1      |
| 2.80E-123 | 11 | BACH2      |
| 3.96E-123 | 11 | KCNK12     |
| 4.82E-123 | 11 | LPP        |
| 6.72E-120 | 11 | DAAM1      |
| 7.28E-120 | 11 | PARP1      |
| 8.85E-119 | 11 | LAT2       |
| 1.27E-118 | 11 | GRAMD1C    |
| 9.60E-118 | 11 | HVCN1      |
| 8.20E-117 | 11 | TXNDC5     |
| 1.32E-116 | 11 | TMEM131L   |
| 1.49E-116 | 11 | AC012368.1 |
| 3.28E-116 | 11 | RASGRP3    |
| 4.54E-116 | 11 | HMGA1      |
| 1.09E-115 | 11 | DNASE1     |
| 1.89E-115 | 11 | STX7       |
| 8.67E-115 | 11 | DPH7       |
| 1.16E-114 | 11 | UGT8       |
| 9.57E-114 | 11 | NEK6       |
| 1.28E-113 | 11 | SNX8       |



|           |    |            |
|-----------|----|------------|
| 1.68E-113 | 11 | CDCA7L     |
| 7.42E-113 | 11 | PKHD1L1    |
| 1.29E-112 | 11 | TCEA1      |
| 2.88E-112 | 11 | MICAL3     |
| 3.42E-112 | 11 | GPR18      |
| 9.88E-112 | 11 | AC119396.1 |
| 1.26E-111 | 11 | ABR        |
| 1.10E-109 | 11 | AC025569.1 |
| 1.62E-109 | 11 | TLR10      |
| 1.62E-109 | 11 | KLHL6      |
| 1.83E-109 | 11 | RRAS2      |
| 5.48E-109 | 11 | SCARB1     |
| 6.29E-109 | 11 | SSBP2      |
| 8.19E-109 | 11 | ZBTB20-AS5 |
| 1.42E-108 | 11 | SPIB       |
| 3.27E-106 | 11 | FAM3C      |
| 8.05E-106 | 11 | SYK        |
| 9.63E-106 | 11 | QSOX2      |
| 5.63E-105 | 11 | NCOA3      |
| 1.33E-104 | 11 | LYN        |
| 2.79E-104 | 11 | HLA-DMA    |
| 1.84E-103 | 11 | SGPP1      |
| 4.63E-103 | 11 | RPRD1B     |
| 5.27E-103 | 11 | CD38       |
| 1.06E-102 | 11 | ST14       |
| 1.91E-102 | 11 | PLEKHG1    |
| 2.66E-102 | 11 | RAD17      |
| 3.52E-102 | 11 | LIMD2      |
| 2.44E-101 | 11 | RMI2       |
| 7.73E-101 | 11 | ZNF581     |
| 1.40E-100 | 11 | MEF2C-AS2  |
| 1.42E-100 | 11 | AIM2       |
| 2.55E-100 | 11 | CCDC69     |
| 3.99E-100 | 11 | NCF1       |
| 6.63E-100 | 11 | TCF4       |
| 1.00E-99  | 11 | KLHL5      |
| 1.29E-99  | 11 | FAM111B    |
| 4.38E-99  | 11 | LINC01215  |
| 1.31E-98  | 11 | HDAC7      |
| 2.33E-98  | 11 | RFC3       |
| 3.37E-98  | 11 | XKR6       |
| 7.80E-98  | 11 | RAB30-DT   |
| 1.07E-97  | 11 | HMCES      |

|          |    |            |
|----------|----|------------|
| 1.19E-96 | 11 | ZNF318     |
| 1.28E-96 | 11 | JSRP1      |
| 1.60E-96 | 11 | RFTN1      |
| 5.17E-96 | 11 | LY86       |
| 7.97E-96 | 11 | TEX9       |
| 8.10E-96 | 11 | MAML3      |
| 1.32E-95 | 11 | BCAR3      |
| 1.44E-95 | 11 | HMGN1      |
| 2.35E-95 | 11 | APBB2      |
| 8.11E-95 | 11 | AMFR       |
| 3.21E-94 | 11 | CPNE3      |
| 5.34E-94 | 11 | SHISA8     |
| 7.33E-94 | 11 | IL4R       |
| 7.92E-92 | 11 | TMEM131    |
| 1.32E-91 | 11 | ITSN2      |
| 2.14E-91 | 11 | ACADM      |
| 3.35E-91 | 11 | NLK        |
| 3.85E-91 | 11 | GGA2       |
| 6.97E-91 | 11 | PAWR       |
| 7.47E-91 | 11 | SEC14L1    |
| 8.96E-91 | 11 | STRBP      |
| 9.29E-91 | 11 | SGCE       |
| 1.78E-90 | 11 | TEC        |
| 2.74E-90 | 11 | KCNQ5      |
| 1.12E-89 | 11 | AC087500.1 |
| 1.87E-89 | 11 | CYB561A3   |
| 2.56E-89 | 11 | ACTG1      |
| 3.56E-89 | 11 | TNFRSF17   |
| 3.77E-89 | 11 | FAM76B     |
| 1.12E-88 | 11 | SMARCB1    |
| 2.12E-88 | 11 | LAPTM5     |
| 2.74E-88 | 11 | BRWD1      |
| 9.08E-88 | 11 | LINC02397  |
| 2.16E-87 | 11 | MAP4K4     |
| 2.59E-87 | 11 | USP53      |
| 1.75E-86 | 11 | DAPP1      |
| 9.98E-86 | 11 | NUP88      |
| 1.40E-85 | 11 | LBR        |
| 2.79E-85 | 11 | POLD4      |
| 8.73E-85 | 11 | DOK3       |
| 2.10E-84 | 11 | USP34      |
| 3.80E-84 | 11 | GNG7       |
| 1.27E-83 | 11 | TSPAN13    |

|          |    |            |
|----------|----|------------|
| 1.89E-82 | 11 | TMEM123    |
| 3.34E-82 | 11 | GMDS       |
| 4.91E-82 | 11 | EVC2       |
| 6.73E-81 | 11 | TCF3       |
| 2.46E-80 | 11 | RHOH       |
| 2.58E-80 | 11 | BICD1      |
| 5.07E-80 | 11 | TSPAN33    |
| 1.85E-79 | 11 | DGKD       |
| 2.15E-79 | 11 | MYO1D      |
| 3.16E-79 | 11 | IFT57      |
| 6.79E-79 | 11 | CPB2-AS1   |
| 9.98E-79 | 11 | LYPLA1     |
| 2.66E-78 | 11 | MBNL2      |
| 3.79E-78 | 11 | BANK1      |
| 6.37E-78 | 11 | IMP4       |
| 2.25E-77 | 11 | BPNT1      |
| 7.65E-77 | 11 | LHFPL2     |
| 8.17E-77 | 11 | CD86       |
| 1.19E-76 | 11 | SORL1      |
| 4.64E-76 | 11 | KLHL29     |
| 1.09E-75 | 11 | SERF2      |
| 1.19E-75 | 11 | PXK        |
| 2.11E-75 | 11 | ZCCHC7     |
| 3.91E-75 | 11 | LRCH3      |
| 1.11E-74 | 11 | AL390957.1 |
| 2.03E-74 | 11 | PIK3AP1    |
| 3.78E-74 | 11 | WDR76      |
| 8.61E-74 | 11 | SYPL1      |
| 3.64E-73 | 11 | AC079921.1 |
| 9.96E-73 | 11 | HLA-DQA1   |
| 2.24E-72 | 11 | LY86-AS1   |
| 3.39E-72 | 11 | PHF6       |
| 8.02E-72 | 11 | GDI2       |
| 1.18E-71 | 11 | C16orf74   |
| 1.68E-71 | 11 | DENND5B    |
| 7.76E-70 | 11 | PPP1CC     |
| 3.68E-69 | 11 | 1-Mar      |
| 7.66E-69 | 11 | GRHPR      |
| 8.28E-69 | 11 | TOX        |
| 1.18E-68 | 11 | POU2F2     |
| 2.55E-68 | 11 | FCRL2      |
| 3.15E-68 | 11 | RBM6       |
| 3.73E-68 | 11 | CCNG2      |

|          |    |          |
|----------|----|----------|
| 4.41E-68 | 11 | RRM2B    |
| 4.51E-68 | 11 | LCP1     |
| 7.58E-68 | 11 | RBM38    |
| 1.74E-67 | 11 | CD74     |
| 2.06E-67 | 11 | RHEX     |
| 3.56E-67 | 11 | SLC4A8   |
| 1.50E-66 | 11 | SPI1     |
| 1.80E-66 | 11 | SNX29    |
| 6.17E-66 | 11 | CLEC17A  |
| 7.86E-66 | 11 | UBE2R2   |
| 9.49E-66 | 11 | HS2ST1   |
| 1.30E-65 | 11 | SLCO3A1  |
| 1.81E-65 | 11 | CTSH     |
| 1.95E-64 | 11 | ARHGAP24 |
| 2.98E-64 | 11 | SH2B2    |
| 3.58E-64 | 11 | ZNF804A  |
| 3.72E-64 | 11 | CLIP2    |
| 5.75E-64 | 11 | NEDD4L   |
| 8.14E-64 | 11 | RABGAP1L |
| 9.24E-64 | 11 | LARGE1   |
| 1.19E-63 | 11 | STMN1    |
| 1.34E-63 | 11 | KATNAL1  |
| 2.47E-63 | 11 | SLC25A5  |
| 2.82E-63 | 11 | MAP4K2   |
| 4.86E-63 | 11 | OTUD1    |
| 5.26E-63 | 11 | SLC9A7   |
| 6.17E-63 | 11 | MRPS27   |
| 1.07E-62 | 11 | ORAI2    |
| 1.12E-62 | 11 | PPP2CA   |
| 1.29E-62 | 11 | MEF2A    |
| 1.59E-62 | 11 | CORO1A   |
| 2.32E-62 | 11 | CD72     |
| 3.69E-62 | 11 | PIK3C2B  |
| 1.09E-61 | 11 | DEGS1    |
| 1.20E-61 | 11 | NIBAN3   |
| 1.28E-61 | 11 | CYBB     |
| 1.85E-61 | 11 | PAG1     |
| 1.92E-61 | 11 | DENND3   |
| 2.15E-61 | 11 | UVRAG    |
| 3.13E-61 | 11 | CD37     |
| 6.55E-61 | 11 | HLA-DRA  |
| 7.89E-61 | 11 | HLA-DOA  |
| 1.13E-60 | 11 | RUBCN    |

|          |    |            |
|----------|----|------------|
| 1.46E-60 | 11 | MSI2       |
| 1.48E-60 | 11 | SH3KBP1    |
| 1.65E-60 | 11 | USP12      |
| 2.35E-60 | 11 | ZNF821     |
| 2.75E-60 | 11 | MED12L     |
| 2.97E-60 | 11 | ANP32B     |
| 4.40E-60 | 11 | EPS15      |
| 6.36E-60 | 11 | VGLL4      |
| 9.24E-60 | 11 | MFHAS1     |
| 1.45E-59 | 11 | HELLS      |
| 2.11E-59 | 11 | FAM102A    |
| 3.09E-59 | 11 | DHFR       |
| 5.43E-59 | 11 | CAMK2D     |
| 7.45E-59 | 11 | ACTB       |
| 1.32E-58 | 11 | MYO9A      |
| 1.39E-58 | 11 | PRKD3      |
| 1.50E-58 | 11 | UBE2E2     |
| 3.90E-58 | 11 | PTPN18     |
| 4.62E-58 | 11 | C12orf49   |
| 4.64E-58 | 11 | CCDC138    |
| 6.34E-58 | 11 | HLA-DRB5   |
| 8.54E-58 | 11 | INPP5D     |
| 9.43E-58 | 11 | DNMT1      |
| 1.94E-57 | 11 | ATP5MG     |
| 2.21E-57 | 11 | AL592429.2 |
| 2.46E-57 | 11 | FBXO30     |
| 2.52E-57 | 11 | TRAK1      |
| 2.54E-56 | 11 | CDK13      |
| 2.60E-56 | 11 | CENPM      |
| 3.02E-56 | 11 | BLOC1S6    |
| 7.33E-56 | 11 | RB1        |
| 9.92E-56 | 11 | TRIM38     |
| 1.02E-55 | 11 | ZNF827     |
| 2.21E-55 | 11 | SIPA1L3    |
| 2.99E-55 | 11 | PLEKHF2    |
| 3.11E-55 | 11 | TKT        |
| 4.82E-55 | 11 | THRB       |
| 1.12E-54 | 11 | TMEM243    |
| 1.45E-54 | 11 | OTULIN     |
| 1.85E-54 | 11 | BMP2K      |
| 1.86E-54 | 11 | CENPU      |
| 9.12E-54 | 11 | SCRN1      |
| 1.33E-53 | 11 | HMGB1      |

|          |    |           |
|----------|----|-----------|
| 2.02E-53 | 11 | SNX30     |
| 2.20E-53 | 11 | LINC01184 |
| 2.77E-53 | 11 | METAP2    |
| 3.32E-53 | 11 | GCHFR     |
| 3.35E-53 | 11 | ATP2A3    |
| 3.63E-53 | 11 | FCRL3     |
| 3.88E-53 | 11 | BCL6      |
| 4.66E-53 | 11 | CASD1     |
| 5.50E-53 | 11 | HDAC1     |
| 1.13E-52 | 11 | SYNE1     |
| 2.08E-52 | 11 | PLEKHJ1   |
| 2.17E-52 | 11 | GIT2      |
| 5.16E-52 | 11 | EZR       |
| 6.01E-52 | 11 | TRIO      |
| 6.22E-52 | 11 | BCL2L11   |
| 6.51E-52 | 11 | BTK       |
| 8.21E-52 | 11 | SKAP2     |
| 1.07E-51 | 11 | CUX1      |
| 1.11E-51 | 11 | BPTF      |
| 1.97E-51 | 11 | HSH2D     |
| 2.53E-51 | 11 | PTTG1     |
| 2.64E-51 | 11 | KCNMB4    |
| 3.16E-51 | 11 | PM20D2    |
| 3.81E-51 | 11 | GIHCG     |
| 5.73E-51 | 11 | CCDC126   |
| 7.15E-51 | 11 | SNED1     |
| 1.21E-50 | 11 | MDM4      |
| 1.50E-50 | 11 | HMGN2     |
| 2.98E-50 | 11 | SLC35E3   |
| 4.35E-50 | 11 | RHBDD1    |
| 4.92E-50 | 11 | RAP1B     |
| 5.43E-50 | 11 | PIK3CG    |
| 5.52E-50 | 11 | LONRF1    |
| 6.05E-50 | 11 | CD53      |
| 6.54E-50 | 11 | RABEP2    |
| 7.37E-50 | 11 | AP1S3     |
| 7.73E-50 | 11 | ARPC2     |
| 1.04E-49 | 11 | HLA-DQA2  |
| 1.04E-49 | 11 | LY9       |
| 1.15E-49 | 11 | SUSD3     |
| 1.22E-49 | 11 | EPS15L1   |
| 1.42E-49 | 11 | TMEM19    |
| 2.62E-49 | 11 | USPL1     |

|          |    |           |
|----------|----|-----------|
| 3.64E-49 | 11 | UCP2      |
| 6.91E-49 | 11 | SETDB2    |
| 7.90E-49 | 11 | MIS18BP1  |
| 9.31E-49 | 11 | TMA16     |
| 1.14E-48 | 11 | UBR7      |
| 1.46E-48 | 11 | MTMR12    |
| 2.27E-48 | 11 | TSBP1-AS1 |
| 3.37E-48 | 11 | MTMR14    |
| 5.25E-48 | 11 | CARD11    |
| 5.28E-48 | 11 | PRDX6     |
| 5.57E-48 | 11 | NDUFAF6   |
| 7.94E-48 | 11 | P2RY8     |
| 8.24E-48 | 11 | HLA-DQB1  |
| 1.35E-47 | 11 | MSH6      |
| 2.31E-47 | 11 | SLC49A4   |
| 3.01E-47 | 11 | EIF2AK3   |
| 3.22E-47 | 11 | ZFAND6    |
| 3.76E-47 | 11 | BFSP2-AS1 |
| 4.28E-47 | 11 | LPIN1     |
| 2.31E-46 | 11 | SLC38A9   |
| 5.72E-46 | 11 | FAM49A    |
| 7.63E-46 | 11 | SLC23A2   |
| 1.59E-45 | 11 | VEZT      |
| 1.63E-45 | 11 | NCOA7     |
| 2.82E-45 | 11 | RALGPS2   |
| 4.10E-45 | 11 | EXT1      |
| 4.35E-45 | 11 | OGA       |
| 5.65E-45 | 11 | FADS3     |
| 6.12E-45 | 11 | TPCN1     |
| 9.03E-45 | 11 | WASHC4    |
| 1.23E-44 | 11 | ODC1      |
| 1.48E-44 | 11 | LAMTOR5   |
| 1.55E-44 | 11 | RAPGEF1   |
| 1.59E-44 | 11 | HLA-DRB1  |
| 1.68E-44 | 11 | CCNI      |
| 2.76E-44 | 11 | CSK       |
| 2.83E-44 | 11 | DMXL1     |
| 3.69E-44 | 11 | TACC1     |
| 4.19E-44 | 11 | MMD       |
| 6.00E-44 | 11 | MRPS28    |
| 6.46E-44 | 11 | CUL3      |
| 6.47E-44 | 11 | SCPEP1    |
| 7.94E-44 | 11 | PLIN3     |

|          |    |            |
|----------|----|------------|
| 1.28E-43 | 11 | UGCG       |
| 2.83E-43 | 11 | RGS16      |
| 3.48E-43 | 11 | SRSF9      |
| 3.67E-43 | 11 | LSM10      |
| 3.88E-43 | 11 | PRKCE      |
| 4.26E-43 | 11 | GPR160     |
| 5.45E-43 | 11 | SNRNP25    |
| 1.31E-42 | 11 | FCRL5      |
| 1.42E-42 | 11 | CDK14      |
| 1.96E-42 | 11 | RCSD1      |
| 2.96E-42 | 11 | FCHSD2     |
| 4.71E-42 | 11 | RBBP4      |
| 5.31E-42 | 11 | NANS       |
| 5.76E-42 | 11 | RAB3GAP2   |
| 7.86E-42 | 11 | DCUN1D1    |
| 8.61E-42 | 11 | GRK3       |
| 9.42E-42 | 11 | TSC1       |
| 9.49E-42 | 11 | USP7       |
| 1.08E-41 | 11 | C12orf75   |
| 1.55E-41 | 11 | CERS4      |
| 2.16E-41 | 11 | RNF144B    |
| 2.30E-41 | 11 | SNX5       |
| 3.83E-41 | 11 | ADGRG5     |
| 3.94E-41 | 11 | NIN        |
| 5.34E-41 | 11 | CCDC6      |
| 5.81E-41 | 11 | CXXC5      |
| 7.27E-41 | 11 | EIPR1      |
| 7.75E-41 | 11 | XRCC4      |
| 1.09E-40 | 11 | MCOLN2     |
| 1.34E-40 | 11 | ENTPD4     |
| 1.41E-40 | 11 | MCM5       |
| 1.67E-40 | 11 | PVT1       |
| 1.85E-40 | 11 | KBTBD8     |
| 3.22E-40 | 11 | AC025164.1 |
| 3.82E-40 | 11 | ACTR3      |
| 5.64E-40 | 11 | CHMP7      |
| 9.75E-40 | 11 | PARP11     |
| 1.48E-39 | 11 | RABGAP1    |
| 1.94E-39 | 11 | MAP1LC3B   |
| 2.00E-39 | 11 | FBXO10     |
| 2.03E-39 | 11 | ATM        |
| 2.37E-39 | 11 | ITPKB      |
| 3.38E-39 | 11 | UBE2G1     |



|          |    |            |
|----------|----|------------|
| 3.55E-39 | 11 | RFC1       |
| 5.85E-39 | 11 | FAM214A    |
| 6.10E-39 | 11 | ADORA2A    |
| 7.01E-39 | 11 | UBAP2      |
| 1.05E-38 | 11 | RNF121     |
| 1.19E-38 | 11 | GAPDH      |
| 1.40E-38 | 11 | MCCC1      |
| 1.51E-38 | 11 | PRDM2      |
| 1.78E-38 | 11 | ACAP2      |
| 2.20E-38 | 11 | ABI1       |
| 2.23E-38 | 11 | LMO4       |
| 2.75E-38 | 11 | DCK        |
| 2.99E-38 | 11 | ARID1B     |
| 4.42E-38 | 11 | LTB        |
| 4.94E-38 | 11 | EZH2       |
| 5.05E-38 | 11 | ARPC3      |
| 5.43E-38 | 11 | TERF2IP    |
| 6.91E-38 | 11 | ROCK2      |
| 1.09E-37 | 11 | CIITA      |
| 1.82E-37 | 11 | RMND5B     |
| 1.92E-37 | 11 | MGAT5      |
| 2.19E-37 | 11 | CD81       |
| 2.28E-37 | 11 | HERC4      |
| 4.15E-37 | 11 | AC009522.1 |
| 5.46E-37 | 11 | B3GLCT     |
| 1.93E-36 | 11 | RNGTT      |
| 2.06E-36 | 11 | NPAT       |
| 2.15E-36 | 11 | UQCC2      |
| 2.36E-36 | 11 | AC010894.3 |
| 2.57E-36 | 11 | MOB1B      |
| 2.88E-36 | 11 | MCM7       |
| 2.92E-36 | 11 | FAM30A     |
| 3.29E-36 | 11 | FARP2      |
| 5.97E-36 | 11 | OAZ1       |
| 7.21E-36 | 11 | SETBP1     |
| 7.35E-36 | 11 | WDR27      |
| 8.36E-36 | 11 | RUFY3      |
| 8.65E-36 | 11 | LINC02422  |
| 9.50E-36 | 11 | ADAM17     |
| 1.39E-35 | 11 | SNX3       |
| 1.92E-35 | 11 | MEF2C-AS1  |
| 2.07E-35 | 11 | HLA-DPA1   |
| 2.09E-35 | 11 | PRRG4      |

|          |    |            |
|----------|----|------------|
| 2.42E-35 | 11 | HACD2      |
| 2.69E-35 | 11 | LINC00426  |
| 2.77E-35 | 11 | ARHGAP17   |
| 7.93E-35 | 11 | CFL1       |
| 8.69E-35 | 11 | STX12      |
| 1.17E-34 | 11 | HIP1R      |
| 1.72E-34 | 11 | ARHGAP25   |
| 1.73E-34 | 11 | C22orf34   |
| 1.73E-34 | 11 | MRPL51     |
| 1.78E-34 | 11 | CHD9       |
| 2.10E-34 | 11 | HERPUD1    |
| 2.68E-34 | 11 | SOCS1      |
| 2.74E-34 | 11 | LRCH1      |
| 2.84E-34 | 11 | AC073111.4 |
| 2.87E-34 | 11 | EIF4ENIF1  |
| 2.90E-34 | 11 | SP140      |
| 3.04E-34 | 11 | RBBP7      |
| 3.50E-34 | 11 | NUSAP1     |
| 4.15E-34 | 11 | MOB3A      |
| 4.20E-34 | 11 | GSTZ1      |
| 5.77E-34 | 11 | SS18       |
| 6.13E-34 | 11 | KMT2A      |
| 8.60E-34 | 11 | TBC1D1     |
| 9.91E-34 | 11 | SREBF2     |
| 1.18E-33 | 11 | EYA3       |
| 1.35E-33 | 11 | CEP57      |
| 1.50E-33 | 11 | HDAC9      |
| 1.94E-33 | 11 | HLA-DPB1   |
| 2.20E-33 | 11 | MPP6       |
| 2.49E-33 | 11 | FNBP1      |
| 2.63E-33 | 11 | HSD17B12   |
| 3.57E-33 | 11 | SNX2       |
| 4.17E-33 | 11 | SASH3      |
| 4.81E-33 | 11 | HOPX       |
| 7.19E-33 | 11 | SMARCA4    |
| 7.61E-33 | 11 | ATXN10     |
| 1.64E-32 | 11 | DBNL       |
| 1.82E-32 | 11 | BAG2       |
| 3.07E-32 | 11 | EBLN3P     |
| 5.33E-32 | 11 | CD83       |
| 6.86E-32 | 11 | MRPL15     |
| 6.88E-32 | 11 | MTPN       |
| 7.06E-32 | 11 | CD2AP      |

|          |    |            |
|----------|----|------------|
| 7.10E-32 | 11 | CYB5R3     |
| 7.67E-32 | 11 | MAP4K1     |
| 7.74E-32 | 11 | AMD1       |
| 7.81E-32 | 11 | ANAPC15    |
| 8.24E-32 | 11 | RCC2       |
| 1.01E-31 | 11 | WDPCP      |
| 1.22E-31 | 11 | OSER1      |
| 1.34E-31 | 11 | NET1       |
| 1.39E-31 | 11 | XPO1       |
| 1.72E-31 | 11 | ARHGEF18   |
| 1.78E-31 | 11 | CLCN6      |
| 3.14E-31 | 11 | HNRNPD     |
| 4.17E-31 | 11 | SLC44A2    |
| 7.04E-31 | 11 | ALOX5      |
| 7.40E-31 | 11 | POMP       |
| 8.21E-31 | 11 | LYL1       |
| 9.79E-31 | 11 | MAST2      |
| 1.47E-30 | 11 | AC005670.3 |
| 1.77E-30 | 11 | AL078459.1 |
| 1.90E-30 | 11 | QRSL1      |
| 1.93E-30 | 11 | TP53INP1   |
| 2.07E-30 | 11 | ANO6       |
| 2.75E-30 | 11 | ZBTB44     |
| 3.09E-30 | 11 | ASB2       |
| 3.09E-30 | 11 | ADAM28     |
| 3.51E-30 | 11 | PIKFYVE    |
| 3.68E-30 | 11 | BRK1       |
| 3.88E-30 | 11 | STIM2      |
| 4.86E-30 | 11 | IPO5       |
| 6.14E-30 | 11 | LINC02245  |
| 6.27E-30 | 11 | PUDP       |
| 1.26E-29 | 11 | SMDT1      |
| 1.37E-29 | 11 | TTLL3      |
| 2.05E-29 | 11 | LY75       |
| 2.07E-29 | 11 | DMTF1      |
| 2.56E-29 | 11 | ISG20      |
| 2.89E-29 | 11 | DENND6B    |
| 3.07E-29 | 11 | RAP2A      |
| 3.60E-29 | 11 | SFT2D1     |
| 4.50E-29 | 11 | RHOA       |
| 4.98E-29 | 11 | ESR2       |
| 5.54E-29 | 11 | ILRUN      |
| 5.80E-29 | 11 | LINC01572  |

|          |    |             |
|----------|----|-------------|
| 7.05E-29 | 11 | ZNF626      |
| 1.23E-28 | 11 | ERP44       |
| 1.42E-28 | 11 | SIAH2       |
| 1.42E-28 | 11 | EHD1        |
| 1.51E-28 | 11 | METTL7A     |
| 1.85E-28 | 11 | GABARAPL2   |
| 1.93E-28 | 11 | AL133480.1  |
| 2.16E-28 | 11 | NFX1        |
| 2.28E-28 | 11 | IGHM        |
| 2.51E-28 | 11 | MYL6B       |
| 2.72E-28 | 11 | HNRNPA1     |
| 3.16E-28 | 11 | MFAP1       |
| 3.72E-28 | 11 | REPIN1      |
| 4.08E-28 | 11 | MRPL35      |
| 4.45E-28 | 11 | UIMC1       |
| 4.68E-28 | 11 | UHRF2       |
| 4.70E-28 | 11 | PGLS        |
| 5.44E-28 | 11 | SNHG29      |
| 5.82E-28 | 11 | PALM2-AKAP2 |
| 6.06E-28 | 11 | PCCB        |
| 7.36E-28 | 11 | ZCCHC10     |
| 7.59E-28 | 11 | PNN         |
| 1.36E-27 | 11 | RPAIN       |
| 1.69E-27 | 11 | DBI         |
| 1.71E-27 | 11 | ZFAT        |
| 1.79E-27 | 11 | FYTTD1      |
| 2.18E-27 | 11 | MAD1L1      |
| 2.55E-27 | 11 | MPZL1       |
| 2.60E-27 | 11 | PPP1CA      |
| 2.72E-27 | 11 | DDX39A      |
| 3.71E-27 | 11 | MGME1       |
| 4.06E-27 | 11 | SINHCAF     |
| 4.39E-27 | 11 | GTF2I       |
| 4.65E-27 | 11 | SEC62       |
| 5.04E-27 | 11 | FRY         |
| 5.18E-27 | 11 | MYEF2       |
| 5.47E-27 | 11 | GTF2E2      |
| 5.47E-27 | 11 | PPP3CC      |
| 6.84E-27 | 11 | SELENOH     |
| 7.16E-27 | 11 | BLCAP       |
| 9.72E-27 | 11 | H3F3A       |
| 1.01E-26 | 11 | MGMT        |
| 1.15E-26 | 11 | OSBPL3      |

|          |    |            |
|----------|----|------------|
| 1.60E-26 | 11 | BAZ2B      |
| 2.42E-26 | 11 | TASOR2     |
| 3.13E-26 | 11 | PRDX3      |
| 5.20E-26 | 11 | NCF4       |
| 7.13E-26 | 11 | WASF2      |
| 7.91E-26 | 11 | CAPN1      |
| 8.19E-26 | 11 | NT5C2      |
| 8.30E-26 | 11 | RAN        |
| 9.86E-26 | 11 | ZHX3       |
| 1.03E-25 | 11 | OSBPL9     |
| 1.04E-25 | 11 | AFTPH      |
| 1.20E-25 | 11 | DEPDC5     |
| 1.32E-25 | 11 | SNHG5      |
| 1.32E-25 | 11 | RC3H2      |
| 1.53E-25 | 11 | CKS1B      |
| 2.11E-25 | 11 | NFATC1     |
| 2.27E-25 | 11 | PFN1       |
| 2.75E-25 | 11 | KHDRBS1    |
| 2.84E-25 | 11 | KLHL24     |
| 3.34E-25 | 11 | OGFRL1     |
| 3.38E-25 | 11 | MSH2       |
| 6.83E-25 | 11 | SLC37A1    |
| 8.16E-25 | 11 | RNF41      |
| 8.24E-25 | 11 | XPNPEP1    |
| 9.03E-25 | 11 | CD2BP2     |
| 9.33E-25 | 11 | C19orf48   |
| 1.01E-24 | 11 | AC024560.5 |
| 1.09E-24 | 11 | LSM6       |
| 1.23E-24 | 11 | NAA38      |
| 1.35E-24 | 11 | UBE2N      |
| 1.35E-24 | 11 | ATP5MC3    |
| 2.19E-24 | 11 | RFXANK     |
| 2.49E-24 | 11 | GLRX3      |
| 2.58E-24 | 11 | ZNF580     |
| 2.64E-24 | 11 | ARHGEF7    |
| 3.19E-24 | 11 | ZNF532     |
| 3.21E-24 | 11 | ITGAE      |
| 4.08E-24 | 11 | SGSM3      |
| 4.16E-24 | 11 | KCTD9      |
| 4.72E-24 | 11 | RHBDF2     |
| 4.83E-24 | 11 | CEP135     |
| 5.50E-24 | 11 | CENPP      |
| 5.66E-24 | 11 | ITPR1      |

|          |    |            |
|----------|----|------------|
| 6.45E-24 | 11 | ATP8A1     |
| 6.99E-24 | 11 | CCT8       |
| 7.56E-24 | 11 | RMDN1      |
| 9.04E-24 | 11 | SNRPE      |
| 1.29E-23 | 11 | FAM13B     |
| 1.44E-23 | 11 | LINC00467  |
| 1.44E-23 | 11 | ROMO1      |
| 1.61E-23 | 11 | SNAP23     |
| 1.64E-23 | 11 | CHAF1A     |
| 1.84E-23 | 11 | KLF12      |
| 1.87E-23 | 11 | CNTRL      |
| 1.92E-23 | 11 | CLTC       |
| 2.04E-23 | 11 | SFXN4      |
| 2.04E-23 | 11 | AC027644.3 |
| 2.49E-23 | 11 | UPF3A      |
| 2.60E-23 | 11 | MBD2       |
| 2.60E-23 | 11 | CAB39L     |
| 2.84E-23 | 11 | PARN       |
| 3.19E-23 | 11 | TAPT1      |
| 4.49E-23 | 11 | ARPC4      |
| 4.69E-23 | 11 | HMGB2      |
| 5.53E-23 | 11 | TIAM2      |
| 7.41E-23 | 11 | ZNF66      |
| 9.23E-23 | 11 | LSM7       |
| 9.93E-23 | 11 | RABEP1     |
| 1.09E-22 | 11 | PMAIP1     |
| 1.30E-22 | 11 | USP22      |
| 1.75E-22 | 11 | PPP4C      |
| 2.04E-22 | 11 | TADA3      |
| 2.04E-22 | 11 | ELF1       |
| 2.14E-22 | 11 | AP1B1      |
| 2.18E-22 | 11 | PSMA4      |
| 2.54E-22 | 11 | RABGEF1    |
| 2.57E-22 | 11 | WIPF1      |
| 2.75E-22 | 11 | POLR2G     |
| 2.83E-22 | 11 | ZNF552     |
| 3.14E-22 | 11 | MTF2       |
| 3.87E-22 | 11 | BAIAP2L1   |
| 4.00E-22 | 11 | RAB11FIP1  |
| 4.34E-22 | 11 | COX5A      |
| 5.21E-22 | 11 | BOD1L1     |
| 5.29E-22 | 11 | TUT7       |
| 6.11E-22 | 11 | COX11      |

|          |    |            |
|----------|----|------------|
| 6.16E-22 | 11 | SH3BP5     |
| 6.80E-22 | 11 | LYRM4      |
| 7.00E-22 | 11 | LUC7L3     |
| 7.13E-22 | 11 | YWHAQ      |
| 7.34E-22 | 11 | MBNL3      |
| 7.84E-22 | 11 | TRABD      |
| 8.43E-22 | 11 | STK40      |
| 9.08E-22 | 11 | ZNF106     |
| 9.96E-22 | 11 | SPPL2B     |
| 1.14E-21 | 11 | YWHAB      |
| 1.15E-21 | 11 | UGGT1      |
| 1.60E-21 | 11 | URM1       |
| 2.27E-21 | 11 | PHB2       |
| 2.33E-21 | 11 | SLC9B2     |
| 2.56E-21 | 11 | SHLD1      |
| 2.57E-21 | 11 | RIC1       |
| 2.67E-21 | 11 | ATP10D     |
| 3.25E-21 | 11 | AL162253.2 |
| 3.38E-21 | 11 | FOXN3      |
| 3.42E-21 | 11 | ZNF141     |
| 3.72E-21 | 11 | MOB1A      |
| 3.82E-21 | 11 | RASSF3     |
| 4.05E-21 | 11 | ATP6V0A1   |
| 4.08E-21 | 11 | SNRPA      |
| 4.26E-21 | 11 | LSM14A     |
| 4.31E-21 | 11 | MARF1      |
| 5.59E-21 | 11 | TUFM       |
| 5.96E-21 | 11 | GSTP1      |
| 6.14E-21 | 11 | PACS1      |
| 6.92E-21 | 11 | TMEM256    |
| 7.53E-21 | 11 | ERBIN      |
| 8.03E-21 | 11 | MDH1       |
| 8.52E-21 | 11 | C1QBP      |
| 1.03E-20 | 11 | LINC01473  |
| 1.16E-20 | 11 | UPF2       |
| 1.16E-20 | 11 | RNF103     |
| 1.40E-20 | 11 | KDM1B      |
| 1.48E-20 | 11 | SYNGR2     |
| 1.53E-20 | 11 | TPST2      |
| 1.63E-20 | 11 | ARRDC1     |
| 2.16E-20 | 11 | ZHX2       |
| 2.18E-20 | 11 | ELP6       |
| 2.41E-20 | 11 | ZNF814     |

|          |    |            |
|----------|----|------------|
| 2.97E-20 | 11 | ACYP2      |
| 3.38E-20 | 11 | CCDC167    |
| 4.14E-20 | 11 | MIOS       |
| 4.54E-20 | 11 | SIT1       |
| 4.86E-20 | 11 | PKIG       |
| 4.93E-20 | 11 | SRP9       |
| 5.17E-20 | 11 | ARID5B     |
| 5.55E-20 | 11 | ATP5F1B    |
| 7.73E-20 | 11 | TFEB       |
| 7.74E-20 | 11 | MICU2      |
| 8.24E-20 | 11 | MRPL52     |
| 8.41E-20 | 11 | ANKRD26    |
| 1.08E-19 | 11 | TBC1D22A   |
| 1.12E-19 | 11 | SLC25A3    |
| 1.14E-19 | 11 | ARSB       |
| 1.15E-19 | 11 | CCM2       |
| 1.30E-19 | 11 | FGD2       |
| 1.72E-19 | 11 | TAF1D      |
| 2.01E-19 | 11 | ACTR2      |
| 2.02E-19 | 11 | SCAF8      |
| 2.07E-19 | 11 | MAPK8IP3   |
| 2.13E-19 | 11 | CDR2       |
| 2.46E-19 | 11 | GABPB1-AS1 |
| 2.49E-19 | 11 | COMMD4     |
| 2.52E-19 | 11 | DGUOK      |
| 2.65E-19 | 11 | SEPHS2     |
| 2.86E-19 | 11 | LSM8       |
| 3.13E-19 | 11 | ATP6V1A    |
| 4.29E-19 | 11 | AF117829.1 |
| 4.64E-19 | 11 | ATP5PF     |
| 4.94E-19 | 11 | PRDX1      |
| 5.03E-19 | 11 | DRAM2      |
| 5.12E-19 | 11 | ZRANB3     |
| 5.75E-19 | 11 | ACSF3      |
| 6.72E-19 | 11 | GON7       |
| 7.61E-19 | 11 | EIF2B1     |
| 8.06E-19 | 11 | AP5Z1      |
| 8.21E-19 | 11 | FO393401.1 |
| 8.24E-19 | 11 | ZDHHC21    |
| 9.41E-19 | 11 | SHOC2      |
| 9.57E-19 | 11 | GLRX5      |
| 9.96E-19 | 11 | IDE        |
| 1.04E-18 | 11 | IAH1       |



|          |    |          |
|----------|----|----------|
| 1.14E-18 | 11 | FAM135A  |
| 1.42E-18 | 11 | CDV3     |
| 1.42E-18 | 11 | VCPKMT   |
| 1.67E-18 | 11 | LARP4B   |
| 1.68E-18 | 11 | ARL2BP   |
| 1.72E-18 | 11 | PHF10    |
| 2.04E-18 | 11 | MCTS1    |
| 2.07E-18 | 11 | SRGAP2   |
| 2.42E-18 | 11 | ARPC1B   |
| 2.51E-18 | 11 | HSD17B10 |
| 2.70E-18 | 11 | HELZ     |
| 2.71E-18 | 11 | EIF2S3   |
| 2.75E-18 | 11 | CEPT1    |
| 2.79E-18 | 11 | SRGAP2B  |
| 3.18E-18 | 11 | SLC25A33 |
| 3.21E-18 | 11 | HTT      |
| 3.47E-18 | 11 | RPAP3    |
| 3.65E-18 | 11 | MRPL37   |
| 4.43E-18 | 11 | RHOQ     |
| 4.61E-18 | 11 | MCM3     |
| 4.80E-18 | 11 | 8-Mar    |
| 5.04E-18 | 11 | SULF2    |
| 5.09E-18 | 11 | CD27     |
| 5.30E-18 | 11 | CNN2     |
| 5.68E-18 | 11 | LRRC37A2 |
| 6.14E-18 | 11 | SLAIN2   |
| 6.30E-18 | 11 | SKA2     |
| 6.32E-18 | 11 | MRPS14   |
| 7.00E-18 | 11 | PIGB     |
| 7.40E-18 | 11 | SELENOT  |
| 7.99E-18 | 11 | INTS10   |
| 8.03E-18 | 11 | UQCRH    |
| 8.39E-18 | 11 | UBE2H    |
| 8.90E-18 | 11 | HSBP1    |
| 1.00E-17 | 11 | ARF5     |
| 1.07E-17 | 11 | THOC2    |
| 1.09E-17 | 11 | PPP2R1A  |
| 1.26E-17 | 11 | COQ7     |
| 1.26E-17 | 11 | GGNBP2   |
| 1.39E-17 | 11 | CPSF3    |
| 1.43E-17 | 11 | DLEU2    |
| 1.44E-17 | 11 | TCHP     |
| 1.50E-17 | 11 | CCNB1IP1 |

|          |    |            |
|----------|----|------------|
| 1.61E-17 | 11 | CPSF6      |
| 1.68E-17 | 11 | EEF2       |
| 1.81E-17 | 11 | ZNF107     |
| 2.25E-17 | 11 | RBM26      |
| 2.58E-17 | 11 | AL450998.2 |
| 2.62E-17 | 11 | SAMM50     |
| 2.65E-17 | 11 | MFN1       |
| 2.65E-17 | 11 | STK17A     |
| 2.85E-17 | 11 | CUL4B      |
| 2.90E-17 | 11 | BTBD1      |
| 3.06E-17 | 11 | WWC3       |
| 3.10E-17 | 11 | QARS       |
| 3.13E-17 | 11 | FKBP3      |
| 3.33E-17 | 11 | DYNLL1     |
| 3.84E-17 | 11 | UNK        |
| 4.73E-17 | 11 | CEP170     |
| 4.76E-17 | 11 | ATP6V1E1   |
| 4.87E-17 | 11 | IGHD       |
| 5.18E-17 | 11 | CARHSP1    |
| 5.21E-17 | 11 | PTEN       |
| 6.16E-17 | 11 | IL16       |
| 6.30E-17 | 11 | ASPH       |
| 6.33E-17 | 11 | HCLS1      |
| 6.42E-17 | 11 | PPIA       |
| 6.62E-17 | 11 | CBX5       |
| 7.36E-17 | 11 | FAM49B     |
| 7.56E-17 | 11 | KLHL42     |
| 7.99E-17 | 11 | KIAA0355   |
| 8.23E-17 | 11 | MTHFD1L    |
| 1.04E-16 | 11 | PDE7A      |
| 1.05E-16 | 11 | MX1        |
| 1.07E-16 | 11 | WDR11      |
| 1.11E-16 | 11 | ADA        |
| 1.24E-16 | 11 | PKM        |
| 1.34E-16 | 11 | BRD4       |
| 1.39E-16 | 11 | EIF3A      |
| 1.45E-16 | 11 | SPECC1L    |
| 1.54E-16 | 11 | FAF1       |
| 1.68E-16 | 11 | ZNF700     |
| 1.76E-16 | 11 | BANF1      |
| 1.78E-16 | 11 | TRA2A      |
| 1.90E-16 | 11 | MZT1       |
| 1.91E-16 | 11 | UBE2E1     |

|          |    |            |
|----------|----|------------|
| 2.17E-16 | 11 | INVS       |
| 2.25E-16 | 11 | WAS        |
| 2.32E-16 | 11 | DAZAP1     |
| 2.70E-16 | 11 | LINC01004  |
| 3.97E-16 | 11 | H2AFV      |
| 4.42E-16 | 11 | USP8       |
| 4.64E-16 | 11 | CNIH1      |
| 4.86E-16 | 11 | ARL5A      |
| 5.78E-16 | 11 | CBR4       |
| 5.90E-16 | 11 | POLR2J     |
| 6.35E-16 | 11 | HPS5       |
| 6.49E-16 | 11 | PTRHD1     |
| 6.51E-16 | 11 | ZNF721     |
| 6.54E-16 | 11 | TRAPPC1    |
| 7.41E-16 | 11 | TMEM154    |
| 7.88E-16 | 11 | MAP2K1     |
| 7.92E-16 | 11 | ATP6V1H    |
| 8.85E-16 | 11 | MPLKIP     |
| 9.12E-16 | 11 | NGLY1      |
| 9.42E-16 | 11 | TMC6       |
| 9.55E-16 | 11 | NSMCE1     |
| 9.60E-16 | 11 | TMEM134    |
| 9.96E-16 | 11 | CDYL2      |
| 1.02E-15 | 11 | FERMT3     |
| 1.05E-15 | 11 | SNRPD1     |
| 1.17E-15 | 11 | PSIP1      |
| 1.19E-15 | 11 | CCT2       |
| 1.39E-15 | 11 | PIP4K2A    |
| 1.42E-15 | 11 | AL050309.1 |
| 1.49E-15 | 11 | PAPSS1     |
| 1.51E-15 | 11 | LRIF1      |
| 1.78E-15 | 11 | RBM42      |
| 1.82E-15 | 11 | PABPN1     |
| 1.84E-15 | 11 | CAPN7      |
| 2.40E-15 | 11 | MTERF4     |
| 2.42E-15 | 11 | CLEC16A    |
| 2.52E-15 | 11 | THOC7      |
| 2.55E-15 | 11 | TLR1       |
| 2.58E-15 | 11 | SMAP2      |
| 2.69E-15 | 11 | SUDS3      |
| 2.95E-15 | 11 | SPOPL      |
| 3.06E-15 | 11 | TXN2       |
| 3.08E-15 | 11 | SNRPD3     |

|          |    |         |
|----------|----|---------|
| 3.54E-15 | 11 | NDUFB3  |
| 4.08E-15 | 11 | EIF3I   |
| 4.13E-15 | 11 | RO60    |
| 4.16E-15 | 11 | ATP5F1A |
| 4.19E-15 | 11 | WIPI2   |
| 4.34E-15 | 11 | ERH     |
| 4.91E-15 | 11 | NSD1    |
| 5.52E-15 | 11 | HDAC5   |
| 6.04E-15 | 11 | PISD    |
| 6.14E-15 | 11 | CBL     |
| 6.62E-15 | 11 | SLBP    |
| 7.74E-15 | 11 | ETFB    |
| 7.79E-15 | 11 | PRKCB   |
| 8.53E-15 | 11 | GRB2    |
| 8.71E-15 | 11 | PTPN6   |
| 9.57E-15 | 11 | STRN3   |
| 1.01E-14 | 11 | TRAF5   |
| 1.11E-14 | 11 | PFDN6   |
| 1.13E-14 | 11 | TRANK1  |
| 1.14E-14 | 11 | ARFGEF2 |
| 1.16E-14 | 11 | ZNF92   |
| 1.27E-14 | 11 | SMC6    |
| 1.36E-14 | 11 | PRKRIP1 |
| 1.72E-14 | 11 | EIF1AY  |
| 1.82E-14 | 11 | PLEKHA2 |
| 2.11E-14 | 11 | CCDC115 |
| 2.32E-14 | 11 | TEX10   |
| 2.49E-14 | 11 | GAS5    |
| 2.59E-14 | 11 | MLF2    |
| 2.61E-14 | 11 | PUS10   |
| 3.85E-14 | 11 | NDUFA7  |
| 3.94E-14 | 11 | EWSR1   |
| 4.00E-14 | 11 | SMAD5   |
| 4.56E-14 | 11 | PRMT1   |
| 5.50E-14 | 11 | CYBC1   |
| 6.61E-14 | 11 | PPP3CA  |
| 6.69E-14 | 11 | PTK2B   |
| 6.93E-14 | 11 | EIF3H   |
| 9.29E-14 | 11 | INSIG2  |
| 9.69E-14 | 11 | RERE    |
| 1.03E-13 | 11 | C7orf50 |
| 1.06E-13 | 11 | RUNX1   |
| 1.11E-13 | 11 | CNNM4   |

|          |    |            |
|----------|----|------------|
| 1.40E-13 | 11 | NUCKS1     |
| 1.40E-13 | 11 | RTRAF      |
| 1.41E-13 | 11 | BTF3       |
| 1.42E-13 | 11 | MAP2K2     |
| 1.43E-13 | 11 | ZNF586     |
| 1.57E-13 | 11 | DCTPP1     |
| 1.59E-13 | 11 | SLC41A2    |
| 1.69E-13 | 11 | AKAP8L     |
| 1.81E-13 | 11 | ALPK1      |
| 1.93E-13 | 11 | EIF3F      |
| 2.11E-13 | 11 | PPP6R2     |
| 2.26E-13 | 11 | IKZF3      |
| 2.38E-13 | 11 | MRPS24     |
| 2.48E-13 | 11 | CCT3       |
| 2.69E-13 | 11 | NSRP1      |
| 2.78E-13 | 11 | C1D        |
| 3.28E-13 | 11 | TTC13      |
| 3.49E-13 | 11 | FIBP       |
| 3.50E-13 | 11 | C4orf3     |
| 4.06E-13 | 11 | WDR1       |
| 4.14E-13 | 11 | NDUFAB1    |
| 4.34E-13 | 11 | VHL        |
| 4.49E-13 | 11 | CLPTM1L    |
| 5.20E-13 | 11 | EIF2AK4    |
| 5.58E-13 | 11 | CCNC       |
| 5.71E-13 | 11 | SNHG7      |
| 5.87E-13 | 11 | AL645568.1 |
| 6.24E-13 | 11 | RAB4A      |
| 6.25E-13 | 11 | ATP5MF     |
| 6.62E-13 | 11 | C12orf76   |
| 6.91E-13 | 11 | PHAX       |
| 7.03E-13 | 11 | CPM        |
| 7.22E-13 | 11 | DARS       |
| 7.77E-13 | 11 | ARL14EP    |
| 7.81E-13 | 11 | MRPS15     |
| 8.45E-13 | 11 | SEPTIN2    |
| 9.36E-13 | 11 | NPM1       |
| 1.19E-12 | 11 | HNRNPM     |
| 1.20E-12 | 11 | DMAC2L     |
| 1.27E-12 | 11 | SF3A2      |
| 1.29E-12 | 11 | PLCL2      |
| 1.33E-12 | 11 | THRAP3     |
| 1.42E-12 | 11 | EED        |

|          |    |            |
|----------|----|------------|
| 1.54E-12 | 11 | ACO2       |
| 1.55E-12 | 11 | MRPS36     |
| 1.64E-12 | 11 | VRK1       |
| 1.69E-12 | 11 | DUT        |
| 1.77E-12 | 11 | BLOC1S2    |
| 1.78E-12 | 11 | HNRNPA2B1  |
| 1.88E-12 | 11 | UBE2D2     |
| 1.92E-12 | 11 | UTP6       |
| 2.06E-12 | 11 | IGBP1      |
| 2.25E-12 | 11 | NF1        |
| 2.32E-12 | 11 | MCPH1      |
| 2.56E-12 | 11 | ESD        |
| 2.59E-12 | 11 | COMMD1     |
| 2.72E-12 | 11 | PPP6R1     |
| 2.78E-12 | 11 | COTL1      |
| 2.86E-12 | 11 | TIMM13     |
| 2.87E-12 | 11 | GMFB       |
| 2.89E-12 | 11 | R3HDM1     |
| 3.09E-12 | 11 | AC006001.2 |
| 3.14E-12 | 11 | POLR1D     |
| 3.17E-12 | 11 | IDH2       |
| 3.31E-12 | 11 | SGK1       |
| 3.68E-12 | 11 | INO80      |
| 3.88E-12 | 11 | TFDP1      |
| 4.35E-12 | 11 | TLE4       |
| 4.65E-12 | 11 | MTDH       |
| 4.73E-12 | 11 | SMYD3      |
| 5.07E-12 | 11 | SH2B3      |
| 5.11E-12 | 11 | CNST       |
| 5.39E-12 | 11 | ZMYND8     |
| 5.43E-12 | 11 | PSMD4      |
| 5.51E-12 | 11 | RAB14      |
| 6.19E-12 | 11 | RBX1       |
| 6.23E-12 | 11 | PDSS1      |
| 6.40E-12 | 11 | PANK2      |
| 6.62E-12 | 11 | STOML2     |
| 6.80E-12 | 11 | LSM5       |
| 6.88E-12 | 11 | NIP7       |
| 7.59E-12 | 11 | ZFP36L1    |
| 7.64E-12 | 11 | CPEB3      |
| 7.86E-12 | 11 | UBQLN1     |
| 8.13E-12 | 11 | TESK2      |
| 8.19E-12 | 11 | ATF7IP2    |

|          |    |            |
|----------|----|------------|
| 9.13E-12 | 11 | ATG16L1    |
| 9.18E-12 | 11 | RAD51B     |
| 9.44E-12 | 11 | ATP6V1G1   |
| 1.04E-11 | 11 | MRPL16     |
| 1.07E-11 | 11 | H2AFZ      |
| 1.12E-11 | 11 | NAP1L1     |
| 1.14E-11 | 11 | GTF2H1     |
| 1.38E-11 | 11 | ELAVL1     |
| 1.38E-11 | 11 | RAD9A      |
| 1.41E-11 | 11 | ARPC5L     |
| 1.42E-11 | 11 | LNPEP      |
| 1.42E-11 | 11 | RASSF2     |
| 1.47E-11 | 11 | CCDC18-AS1 |
| 1.50E-11 | 11 | RPIA       |
| 1.54E-11 | 11 | DOP1A      |
| 1.56E-11 | 11 | PTDSS1     |
| 1.58E-11 | 11 | FBXW7      |
| 1.87E-11 | 11 | HADHB      |
| 1.94E-11 | 11 | SRSF10     |
| 2.02E-11 | 11 | WASHC2A    |
| 2.14E-11 | 11 | IL21R      |
| 2.19E-11 | 11 | INPP5A     |
| 2.21E-11 | 11 | MPC2       |
| 2.22E-11 | 11 | MDFIC      |
| 2.29E-11 | 11 | ARGLU1     |
| 2.52E-11 | 11 | PLEKHM2    |
| 2.58E-11 | 11 | TBPL1      |
| 2.68E-11 | 11 | HEIH       |
| 2.70E-11 | 11 | POLA1      |
| 2.78E-11 | 11 | NFAT5      |
| 2.84E-11 | 11 | SLC5A3     |
| 3.02E-11 | 11 | TNPO3      |
| 3.05E-11 | 11 | ELMO1      |
| 3.09E-11 | 11 | PSMA2      |
| 3.13E-11 | 11 | ILF3       |
| 3.45E-11 | 11 | ATP5IF1    |
| 3.91E-11 | 11 | UBA2       |
| 4.03E-11 | 11 | COX7C      |
| 4.28E-11 | 11 | ZMYM4      |
| 4.31E-11 | 11 | TRIM13     |
| 4.47E-11 | 11 | NCBP3      |
| 4.51E-11 | 11 | RACK1      |
| 4.74E-11 | 11 | SET        |

|          |    |         |
|----------|----|---------|
| 4.93E-11 | 11 | PRCP    |
| 4.93E-11 | 11 | FBXO31  |
| 5.18E-11 | 11 | GNG5    |
| 6.18E-11 | 11 | PHTF2   |
| 6.23E-11 | 11 | TRIM26  |
| 6.36E-11 | 11 | COX6C   |
| 6.53E-11 | 11 | HNRNPR  |
| 6.53E-11 | 11 | CD52    |
| 6.78E-11 | 11 | CBX3    |
| 6.86E-11 | 11 | HNRNPK  |
| 7.20E-11 | 11 | SRSF4   |
| 7.61E-11 | 11 | TNKS    |
| 7.93E-11 | 11 | COX6A1  |
| 7.94E-11 | 11 | CD24    |
| 7.97E-11 | 11 | ATP5ME  |
| 8.04E-11 | 11 | FKBP1A  |
| 8.12E-11 | 11 | TAF9    |
| 8.43E-11 | 11 | CARD8   |
| 8.69E-11 | 11 | RBM23   |
| 9.32E-11 | 11 | TUBB    |
| 1.00E-10 | 11 | SLC25A6 |
| 1.22E-10 | 11 | ELOA    |
| 1.23E-10 | 11 | UBTF    |
| 1.55E-10 | 11 | VCPIP1  |
| 1.56E-10 | 11 | MRPS34  |
| 1.71E-10 | 11 | ERGIC1  |
| 1.74E-10 | 11 | TAGAP   |
| 1.83E-10 | 11 | EIF3L   |
| 2.05E-10 | 11 | DCTN3   |
| 2.21E-10 | 11 | AHSA1   |
| 2.35E-10 | 11 | CPQ     |
| 2.56E-10 | 11 | COA1    |
| 2.63E-10 | 11 | USP33   |
| 2.85E-10 | 11 | GRK2    |
| 2.85E-10 | 11 | EVI5    |
| 2.86E-10 | 11 | LPXN    |
| 2.87E-10 | 11 | EIF1B   |
| 2.88E-10 | 11 | RCBTB2  |
| 2.94E-10 | 11 | AKIRIN2 |
| 3.09E-10 | 11 | DANCR   |
| 3.10E-10 | 11 | POGZ    |
| 3.12E-10 | 11 | SELENOF |
| 3.14E-10 | 11 | MAN1A1  |



|          |    |             |
|----------|----|-------------|
| 3.42E-10 | 11 | ARPC5       |
| 3.43E-10 | 11 | CSNK2B      |
| 4.32E-10 | 11 | THUMPD3-AS1 |
| 4.46E-10 | 11 | CLEC2D      |
| 4.67E-10 | 11 | TNS3        |
| 4.92E-10 | 11 | CDK2AP2     |
| 5.34E-10 | 11 | ATP5F1C     |
| 5.45E-10 | 11 | ARID1A      |
| 5.81E-10 | 11 | GGCT        |
| 6.22E-10 | 11 | HERC2       |
| 7.03E-10 | 11 | TPM4        |
| 7.69E-10 | 11 | YBX1        |
| 8.78E-10 | 11 | STRAP       |
| 8.93E-10 | 11 | RPGR        |
| 8.96E-10 | 11 | RBM3        |
| 9.53E-10 | 11 | MMADHC      |
| 9.83E-10 | 11 | CCT5        |
| 1.01E-09 | 11 | DERA        |
| 1.20E-09 | 11 | MRPL4       |
| 1.26E-09 | 11 | DDT         |
| 1.31E-09 | 11 | CAP1        |
| 1.33E-09 | 11 | RRAGC       |
| 1.34E-09 | 11 | ATP6V0D1    |
| 1.37E-09 | 11 | NUBPL       |
| 1.39E-09 | 11 | REEP5       |
| 1.49E-09 | 11 | MZT2B       |
| 1.61E-09 | 11 | AC027097.2  |
| 1.68E-09 | 11 | ZBTB10      |
| 1.73E-09 | 11 | COX7A2L     |
| 1.82E-09 | 11 | GNAS        |
| 1.90E-09 | 11 | SEPTIN9     |
| 1.94E-09 | 11 | FAM126A     |
| 2.01E-09 | 11 | MRPL11      |
| 2.19E-09 | 11 | TRAPPC8     |
| 2.30E-09 | 11 | IL12RB1     |
| 2.32E-09 | 11 | WDFY2       |
| 2.69E-09 | 11 | SYNE2       |
| 2.93E-09 | 11 | SYF2        |
| 3.06E-09 | 11 | UQCR10      |
| 3.06E-09 | 11 | ATG4B       |
| 3.07E-09 | 11 | CLTA        |
| 3.23E-09 | 11 | PNKD        |
| 3.35E-09 | 11 | PPP1R12A    |

|          |    |         |
|----------|----|---------|
| 3.94E-09 | 11 | ELOB    |
| 4.13E-09 | 11 | SNRPF   |
| 4.19E-09 | 11 | PPP3CB  |
| 4.53E-09 | 11 | ATP5PB  |
| 4.70E-09 | 11 | BCL2L13 |
| 4.90E-09 | 11 | LYSMD2  |
| 5.24E-09 | 11 | CLINT1  |
| 5.26E-09 | 11 | RIOK3   |
| 5.34E-09 | 11 | IRF2    |
| 5.84E-09 | 11 | MRPS6   |
| 6.10E-09 | 11 | TBC1D5  |
| 6.14E-09 | 11 | MFSD14B |
| 6.36E-09 | 11 | KDM5A   |
| 7.29E-09 | 11 | FAM241A |
| 7.30E-09 | 11 | NUDT21  |
| 7.44E-09 | 11 | NUDT1   |
| 8.71E-09 | 11 | IQCB1   |
| 8.94E-09 | 11 | HNRNPC  |
| 9.81E-09 | 11 | NDUFA11 |
| 1.10E-08 | 11 | SLC30A9 |
| 1.35E-08 | 11 | SPEN    |
| 1.50E-08 | 11 | NAA50   |
| 1.61E-08 | 11 | CHCHD10 |
| 1.75E-08 | 11 | EIF4H   |
| 1.82E-08 | 11 | SLC2A13 |
| 1.99E-08 | 11 | EIF4G3  |
| 2.17E-08 | 11 | COMMD10 |
| 2.21E-08 | 11 | COX6B1  |
| 2.22E-08 | 11 | ZNF148  |
| 2.35E-08 | 11 | PCBP2   |
| 2.47E-08 | 11 | RPA3    |
| 2.48E-08 | 11 | ZNF609  |
| 2.49E-08 | 11 | CHD4    |
| 2.78E-08 | 11 | SF3B6   |
| 2.99E-08 | 11 | DOCK2   |
| 3.26E-08 | 11 | UBE2A   |
| 3.99E-08 | 11 | LRPPRC  |
| 4.24E-08 | 11 | ATP5MPL |
| 4.37E-08 | 11 | SNX25   |
| 4.42E-08 | 11 | SUGT1   |
| 4.51E-08 | 11 | HMG3    |
| 5.16E-08 | 11 | ASH1L   |
| 5.44E-08 | 11 | ECHDC1  |

|          |    |            |
|----------|----|------------|
| 5.91E-08 | 11 | ADCY3      |
| 5.92E-08 | 11 | SP140L     |
| 6.52E-08 | 11 | POLR2J3    |
| 8.01E-08 | 11 | TENT4A     |
| 8.25E-08 | 11 | DDX17      |
| 8.34E-08 | 11 | MAPK1IP1L  |
| 8.40E-08 | 11 | DDX6       |
| 9.06E-08 | 11 | CHCHD1     |
| 9.65E-08 | 11 | CBWD1      |
| 9.85E-08 | 11 | SNU13      |
| 1.01E-07 | 11 | SYTL1      |
| 1.05E-07 | 11 | ANKRD17    |
| 1.07E-07 | 11 | CEP85L     |
| 1.13E-07 | 11 | SYNCRIP    |
| 1.22E-07 | 11 | NFKBID     |
| 1.34E-07 | 11 | WASHC2C    |
| 1.38E-07 | 11 | PSMD13     |
| 1.55E-07 | 11 | KTN1       |
| 1.56E-07 | 11 | DEK        |
| 1.60E-07 | 11 | HIP1       |
| 1.68E-07 | 11 | HADHA      |
| 1.72E-07 | 11 | CHORDC1    |
| 2.02E-07 | 11 | SNX13      |
| 2.08E-07 | 11 | SFPQ       |
| 2.11E-07 | 11 | FBXO11     |
| 2.19E-07 | 11 | MSL2       |
| 2.35E-07 | 11 | MIR181A1HG |
| 2.58E-07 | 11 | RPA1       |
| 2.60E-07 | 11 | UTY        |
| 2.92E-07 | 11 | FAM192A    |
| 3.34E-07 | 11 | ZFAS1      |
| 3.41E-07 | 11 | TCOF1      |
| 3.54E-07 | 11 | NDUFA4     |
| 3.70E-07 | 11 | SMC4       |
| 3.93E-07 | 11 | ASXL1      |
| 4.07E-07 | 11 | SUPT16H    |
| 4.29E-07 | 11 | NDUFA12    |
| 4.33E-07 | 11 | AC007384.1 |
| 4.40E-07 | 11 | TBCA       |
| 4.76E-07 | 11 | SH3TC1     |
| 5.70E-07 | 11 | SYAP1      |
| 6.20E-07 | 11 | ZBTB8OS    |
| 6.26E-07 | 11 | SDE2       |

|          |    |          |
|----------|----|----------|
| 6.88E-07 | 11 | PDE4D    |
| 7.22E-07 | 11 | CYTIP    |
| 8.38E-07 | 11 | EIF4B    |
| 8.62E-07 | 11 | AP1G1    |
| 9.36E-07 | 11 | YWHAE    |
| 9.65E-07 | 11 | NDUFA13  |
| 1.11E-06 | 11 | ZNF10    |
| 1.14E-06 | 11 | SMC3     |
| 1.17E-06 | 11 | NDUFA2   |
| 1.33E-06 | 11 | VASP     |
| 1.33E-06 | 11 | PNRC2    |
| 1.39E-06 | 11 | UBE2I    |
| 1.40E-06 | 11 | SLC35D1  |
| 1.58E-06 | 11 | SOS1     |
| 1.80E-06 | 11 | RFX3-AS1 |
| 1.83E-06 | 11 | SPCS2    |
| 1.84E-06 | 11 | KARS     |
| 1.94E-06 | 11 | ST13     |
| 2.22E-06 | 11 | PAN3     |
| 2.33E-06 | 11 | EIF3M    |
| 2.35E-06 | 11 | OLA1     |
| 2.77E-06 | 11 | RALY     |
| 2.90E-06 | 11 | CIRBP    |
| 2.98E-06 | 11 | NKTR     |
| 3.00E-06 | 11 | RANBP1   |
| 3.01E-06 | 11 | ATP5PO   |
| 3.78E-06 | 11 | REL      |
| 3.96E-06 | 11 | APLP2    |
| 4.01E-06 | 11 | PSMB1    |
| 4.62E-06 | 11 | ATAD2B   |
| 5.21E-06 | 11 | CHCHD3   |
| 8.75E-06 | 11 | EVI2B    |
| 1.04E-05 | 11 | SEM1     |
| 1.06E-05 | 11 | COPE     |
| 1.08E-05 | 11 | CALM3    |
| 1.15E-05 | 11 | PPP4R3A  |
| 1.21E-05 | 11 | ABHD3    |
| 1.39E-05 | 11 | ANP32E   |
| 1.40E-05 | 11 | NOP58    |
| 1.50E-05 | 11 | UBE2L3   |
| 1.60E-05 | 11 | RNF111   |
| 1.75E-05 | 11 | TXNL4A   |
| 1.96E-05 | 11 | GNB1     |

|             |    |          |
|-------------|----|----------|
| 2.14E-05    | 11 | HNRNPA3  |
| 2.20E-05    | 11 | ANKRD11  |
| 2.27E-05    | 11 | LSM3     |
| 2.41E-05    | 11 | RAC2     |
| 2.63E-05    | 11 | UBR5     |
| 2.90E-05    | 11 | ZC3H15   |
| 3.39E-05    | 11 | TACC3    |
| 3.95E-05    | 11 | CAPZB    |
| 3.98E-05    | 11 | SLC39A11 |
| 5.78E-05    | 11 | NSD2     |
| 6.63E-05    | 11 | PAIP2    |
| 7.04E-05    | 11 | TBL1XR1  |
| 7.49E-05    | 11 | ADNP     |
| 8.22E-05    | 11 | SMG1     |
| 8.98E-05    | 11 | JAK1     |
| 0.000101169 | 11 | TAF15    |
| 0.000110563 | 11 | CCDC88C  |
| 0.000116453 | 11 | KDM4B    |
| 0.000132341 | 11 | ATF4     |
| 0.000141564 | 11 | USP9X    |
| 0.000148695 | 11 | SRSF3    |
| 0.000150751 | 11 | CLIP1    |
| 0.000174644 | 11 | AGFG1    |
| 0.000180973 | 11 | IARS     |
| 0.000186875 | 11 | PUM1     |
| 0.000333424 | 11 | RSRC2    |
| 0.000395201 | 11 | YEATS2   |
| 0.000404889 | 11 | SUZ12    |
| 0.000508573 | 11 | NEDD8    |
| 0.00052663  | 11 | PDS5A    |
| 0.000565406 | 11 | RAD21    |
| 0.000582381 | 11 | CHCHD2   |
| 0.000858731 | 11 | TMSB4X   |
| 0.00090492  | 11 | ERO1B    |
| 0.000958241 | 11 | PNISR    |
| 0.001678209 | 11 | BTRC     |
| 0.002587501 | 11 | CDC73    |
| 0.003078992 | 11 | BIRC6    |
| 0.004625879 | 11 | CREBBP   |
| 0.004748748 | 11 | PDS5B    |
| 0.009430185 | 11 | FRYL     |
| 0.03402507  | 11 | LAMP1    |
| 0.096116375 | 11 | ITPR2    |

|             |    |          |
|-------------|----|----------|
| 0.404369222 | 11 | RANBP9   |
| 1           | 11 | HIST1H4C |
| 1           | 11 | FOXP1    |

Sheet 2: Fibroblasts

| <b>Fibroblasts</b> | p_val     | avg_log2FC  | pct.1 | pct.2 |
|--------------------|-----------|-------------|-------|-------|
| LAMA2              | 0         | 1.990609864 | 0.996 | 0.614 |
| ABI3BP             | 0         | 1.661850706 | 0.982 | 0.371 |
| PID1               | 3.66E-306 | 1.692229854 | 0.958 | 0.381 |
| ABCA6              | 1.01E-284 | 1.355488271 | 0.941 | 0.332 |
| DCLK1              | 6.76E-270 | 1.6360896   | 0.935 | 0.403 |
| TGFBR3             | 1.57E-268 | 1.568348059 | 0.944 | 0.42  |
| NFIA               | 1.96E-268 | 1.481002507 | 0.989 | 0.549 |
| TNXB               | 2.24E-261 | 1.439076614 | 0.973 | 0.341 |
| ABCA8              | 1.65E-254 | 1.17065955  | 0.911 | 0.288 |
| CELF2              | 6.36E-253 | 1.359338358 | 0.982 | 0.579 |
| C3                 | 1.11E-248 | 1.481625685 | 0.984 | 0.528 |
| ABLIM1             | 2.94E-248 | 1.290733485 | 0.911 | 0.342 |
| OGN                | 6.22E-244 | 1.402112601 | 0.929 | 0.356 |
| SLIT2              | 7.73E-244 | 1.453147906 | 0.95  | 0.473 |
| ABCA9              | 3.37E-239 | 1.115412705 | 0.822 | 0.245 |
| MGST1              | 7.27E-239 | 1.204017169 | 0.936 | 0.339 |
| LINC01239          | 9.87E-239 | 1.721903388 | 0.68  | 0.153 |
| SCARA5             | 1.96E-238 | 1.202198744 | 0.843 | 0.238 |
| SVEP1              | 5.44E-234 | 1.354837531 | 0.869 | 0.347 |
| NLGN1              | 1.80E-232 | 1.498295792 | 0.75  | 0.217 |
| FGF14              | 8.76E-221 | 1.470920589 | 0.817 | 0.278 |
| FGF7               | 9.16E-218 | 1.150443928 | 0.904 | 0.373 |
| ADH1B              | 3.90E-217 | 1.399052304 | 0.855 | 0.271 |
| CFD                | 5.75E-214 | 1.517164001 | 0.934 | 0.408 |
| SERPINA3           | 7.97E-213 | 1.022249012 | 0.801 | 0.226 |
| CCDC80             | 2.93E-212 | 1.221692159 | 0.996 | 0.8   |
| CLU                | 4.04E-212 | 1.279666094 | 0.974 | 0.544 |
| NOVA1              | 1.07E-208 | 1.025680487 | 0.821 | 0.295 |
| EFEMP1             | 2.17E-208 | 1.082532131 | 0.948 | 0.467 |
| FBLN1              | 1.59E-206 | 1.23373932  | 0.988 | 0.739 |
| MIR99AHG           | 2.66E-206 | 1.337459898 | 0.958 | 0.582 |
| ADGRD1             | 8.74E-206 | 0.963892601 | 0.8   | 0.267 |
| AOX1               | 3.65E-204 | 1.062829136 | 0.738 | 0.215 |
| SLC9A9             | 1.41E-203 | 1.014703904 | 0.834 | 0.33  |
| FOXP2              | 4.34E-203 | 1.111486469 | 0.912 | 0.453 |
| ADD3               | 2.63E-200 | 0.98349299  | 0.954 | 0.576 |
| PODN               | 2.31E-199 | 0.94848734  | 0.93  | 0.469 |
| C1orf21            | 1.35E-197 | 1.04103854  | 0.935 | 0.538 |
| RBMS3              | 6.15E-197 | 1.180588591 | 0.988 | 0.747 |
| CHRD1              | 7.04E-196 | 0.874841763 | 0.727 | 0.208 |
| CFH                | 8.83E-196 | 1.383818817 | 0.984 | 0.72  |

|          |           |             |       |       |
|----------|-----------|-------------|-------|-------|
| ZBTB16   | 9.09E-196 | 1.112133621 | 0.973 | 0.475 |
| ITM2A    | 1.35E-195 | 1.100651647 | 0.87  | 0.321 |
| IL33     | 7.68E-195 | 0.749041893 | 0.66  | 0.162 |
| CXCL12   | 1.92E-193 | 1.038821515 | 0.911 | 0.397 |
| PLA2G2A  | 7.43E-193 | 1.65085374  | 0.781 | 0.265 |
| MGP      | 6.17E-192 | 1.267976617 | 0.995 | 0.733 |
| DCN      | 1.20E-191 | 1.223540899 | 0.997 | 0.899 |
| GSN      | 1.02E-189 | 1.176958963 | 0.994 | 0.828 |
| NEGR1    | 2.27E-189 | 1.237921485 | 0.879 | 0.437 |
| EBF1     | 5.09E-188 | 1.187231339 | 0.979 | 0.586 |
| SFRP1    | 5.17E-187 | 1.61802903  | 0.696 | 0.21  |
| DLG2     | 3.98E-186 | 1.26304811  | 0.887 | 0.454 |
| GFRA1    | 1.63E-185 | 0.879945802 | 0.729 | 0.227 |
| COL4A4   | 3.45E-184 | 1.130559096 | 0.645 | 0.171 |
| FMNL2    | 3.86E-182 | 1.064249258 | 0.813 | 0.343 |
| COL14A1  | 6.57E-181 | 1.170977382 | 0.965 | 0.597 |
| CCN5     | 8.76E-180 | 1.235851102 | 0.735 | 0.224 |
| PDGFRA   | 3.93E-179 | 0.875661419 | 0.951 | 0.544 |
| SLIT3    | 1.20E-178 | 1.08698425  | 0.958 | 0.604 |
| SELENOP  | 2.27E-178 | 0.902743851 | 0.928 | 0.483 |
| LRP1     | 1.83E-177 | 0.853008826 | 0.98  | 0.683 |
| METTL7A  | 2.09E-177 | 0.72673541  | 0.827 | 0.333 |
| ANK2     | 3.02E-176 | 1.0998367   | 0.896 | 0.44  |
| TFPI     | 4.86E-174 | 0.912585984 | 0.959 | 0.546 |
| CILP     | 2.52E-172 | 0.874590172 | 0.755 | 0.242 |
| PCOLCE2  | 2.56E-171 | 1.217268186 | 0.721 | 0.219 |
| CYBRD1   | 2.60E-171 | 0.838978184 | 0.933 | 0.557 |
| CST3     | 3.57E-171 | 0.961605643 | 0.996 | 0.914 |
| LTBP4    | 4.15E-171 | 0.968289111 | 0.955 | 0.565 |
| ABCA10   | 1.24E-170 | 0.981291805 | 0.71  | 0.224 |
| ZFPM2    | 1.81E-170 | 0.994326655 | 0.971 | 0.651 |
| PI16     | 3.86E-169 | 1.035623545 | 0.751 | 0.234 |
| ADAMTSL3 | 2.32E-167 | 0.963529889 | 0.644 | 0.185 |
| C1R      | 3.78E-167 | 0.840389491 | 0.995 | 0.854 |
| 3-Mar    | 2.79E-165 | 1.21905379  | 0.773 | 0.334 |
| USP53    | 3.78E-164 | 1.071161251 | 0.819 | 0.379 |
| AKR1C1   | 2.30E-163 | 0.872636474 | 0.825 | 0.342 |
| ELN      | 5.01E-162 | 0.921489582 | 0.896 | 0.417 |
| DDR2     | 1.44E-161 | 1.031542581 | 0.975 | 0.744 |
| CD34     | 3.37E-161 | 0.65642425  | 0.756 | 0.243 |
| KAZN     | 4.02E-161 | 1.283452277 | 0.801 | 0.39  |
| C1S      | 7.39E-161 | 0.812827202 | 0.995 | 0.818 |
| MFAP4    | 1.74E-160 | 0.978908439 | 0.971 | 0.647 |



|            |           |             |       |       |
|------------|-----------|-------------|-------|-------|
| RSPO3      | 3.26E-160 | 1.03887997  | 0.674 | 0.237 |
| CARMIL1    | 4.73E-159 | 0.963263572 | 0.84  | 0.411 |
| UST        | 2.56E-158 | 1.06782793  | 0.837 | 0.417 |
| PTGIS      | 4.11E-158 | 0.847694619 | 0.727 | 0.234 |
| GPX3       | 3.97E-156 | 0.828081801 | 0.854 | 0.374 |
| SLPI       | 1.13E-155 | 1.030465538 | 0.682 | 0.208 |
| CNTN4      | 5.46E-155 | 1.135251142 | 0.787 | 0.356 |
| EGFR       | 5.53E-155 | 0.954078783 | 0.896 | 0.516 |
| AC108734.4 | 1.96E-154 | 0.736177878 | 0.511 | 0.112 |
| ZBTB20     | 2.97E-154 | 0.831904001 | 0.997 | 0.827 |
| SERPING1   | 3.05E-153 | 0.767042579 | 0.994 | 0.843 |
| PLAC9      | 3.41E-152 | 0.836277781 | 0.979 | 0.632 |
| PROS1      | 1.33E-151 | 0.663049783 | 0.794 | 0.346 |
| SMIM14     | 5.01E-151 | 0.760571976 | 0.893 | 0.52  |
| IGF1       | 1.34E-148 | 1.229174987 | 0.781 | 0.326 |
| MAPK10     | 4.24E-148 | 0.863798733 | 0.862 | 0.45  |
| PARD3B     | 3.25E-147 | 0.943779731 | 0.935 | 0.619 |
| UAP1       | 7.60E-147 | 1.046460216 | 0.911 | 0.593 |
| SRPX       | 2.61E-146 | 0.938811481 | 0.828 | 0.412 |
| ALDH1A1    | 1.75E-145 | 0.648910671 | 0.737 | 0.254 |
| KLF4       | 2.10E-145 | 0.906243356 | 0.891 | 0.473 |
| PLTP       | 4.18E-144 | 0.921608312 | 0.921 | 0.551 |
| PCDH9      | 9.69E-143 | 1.068127494 | 0.649 | 0.238 |
| SFRP2      | 1.33E-141 | 1.179602562 | 0.967 | 0.692 |
| AL445426.1 | 4.69E-141 | 0.705290979 | 0.564 | 0.163 |
| LMO3       | 2.74E-140 | 0.648206419 | 0.535 | 0.142 |
| FBLN2      | 5.26E-140 | 0.916438817 | 0.942 | 0.598 |
| RARRES1    | 1.12E-138 | 1.067601758 | 0.819 | 0.391 |
| AP002518.2 | 1.70E-138 | 0.939444724 | 0.68  | 0.261 |
| TXNIP      | 1.99E-137 | 0.916247922 | 0.972 | 0.723 |
| SDK1       | 8.52E-137 | 1.026126793 | 0.957 | 0.645 |
| SERPINF1   | 9.46E-137 | 0.815701037 | 0.986 | 0.744 |
| ADAMTS5    | 1.05E-136 | 0.973574603 | 0.612 | 0.204 |
| ELMO1      | 6.60E-135 | 0.648705195 | 0.704 | 0.276 |
| SERPINE2   | 8.38E-135 | 0.928159849 | 0.861 | 0.427 |
| SEMA3C     | 2.57E-134 | 1.032767378 | 0.811 | 0.418 |
| IL6ST      | 3.07E-134 | 0.727558041 | 0.964 | 0.75  |
| GPNMB      | 3.08E-133 | 0.831292954 | 0.94  | 0.65  |
| PCSK5      | 4.01E-133 | 0.960220594 | 0.865 | 0.494 |
| IGFBP6     | 7.72E-132 | 0.920007279 | 0.96  | 0.679 |
| ADAMTSL4   | 2.13E-131 | 0.586203905 | 0.611 | 0.194 |
| COL4A3     | 6.90E-131 | 0.726086238 | 0.471 | 0.112 |
| SPATA6     | 1.53E-130 | 0.740087313 | 0.682 | 0.288 |

|            |           |             |       |       |
|------------|-----------|-------------|-------|-------|
| ADAMTSL1   | 1.60E-130 | 1.019549434 | 0.602 | 0.206 |
| CREB5      | 1.69E-130 | 1.004666286 | 0.796 | 0.4   |
| SPTBN1     | 2.30E-130 | 0.69947945  | 0.956 | 0.678 |
| FBN1       | 5.69E-130 | 1.023153415 | 0.979 | 0.757 |
| TSHZ2      | 6.51E-130 | 0.918775987 | 0.904 | 0.531 |
| EFNA5      | 1.08E-129 | 0.800288437 | 0.613 | 0.214 |
| PLPP3      | 5.04E-129 | 0.839288156 | 0.946 | 0.644 |
| CP         | 1.83E-128 | 0.90896511  | 0.443 | 0.099 |
| ZNF385B    | 1.96E-128 | 1.073232952 | 0.56  | 0.184 |
| DLC1       | 4.41E-128 | 0.820471694 | 0.955 | 0.701 |
| PRELP      | 1.13E-126 | 0.798135694 | 0.847 | 0.429 |
| IGSF10     | 1.32E-126 | 0.706826708 | 0.507 | 0.139 |
| PLSCR4     | 7.50E-126 | 0.635474957 | 0.814 | 0.427 |
| NFIB       | 1.15E-124 | 0.745649054 | 0.932 | 0.56  |
| PIK3R1     | 2.36E-124 | 0.991754901 | 0.928 | 0.662 |
| CACNB4     | 2.74E-124 | 0.705318179 | 0.504 | 0.144 |
| AL391117.1 | 4.03E-124 | 0.621881948 | 0.341 | 0.051 |
| LRRN4CL    | 1.21E-123 | 0.586576207 | 0.758 | 0.337 |
| TTC28      | 1.94E-123 | 0.755102694 | 0.953 | 0.682 |
| CPVL       | 4.11E-123 | 0.620576686 | 0.511 | 0.138 |
| MAMDC2     | 4.79E-123 | 0.934425376 | 0.597 | 0.216 |
| DPYD       | 4.81E-123 | 0.741112498 | 0.931 | 0.628 |
| TGFBR2     | 1.49E-122 | 0.757536866 | 0.909 | 0.643 |
| TNFAIP2    | 2.99E-122 | 0.809468394 | 0.718 | 0.325 |
| FCGRT      | 3.40E-122 | 0.669613166 | 0.949 | 0.676 |
| VIT        | 4.90E-122 | 0.743764746 | 0.514 | 0.147 |
| EPB41L3    | 1.82E-121 | 0.664423173 | 0.656 | 0.262 |
| RAB8B      | 2.79E-121 | 0.72757663  | 0.845 | 0.509 |
| FGF13      | 9.83E-121 | 1.061575143 | 0.527 | 0.167 |
| LINC02147  | 1.20E-120 | 1.119169287 | 0.461 | 0.123 |
| FOXO3      | 2.60E-120 | 0.797021939 | 0.961 | 0.683 |
| OMD        | 3.21E-120 | 0.649960721 | 0.755 | 0.337 |
| NFE2L2     | 5.35E-120 | 0.632206173 | 0.945 | 0.708 |
| LSAMP      | 5.47E-120 | 0.782313315 | 0.848 | 0.441 |
| LPAR1      | 9.52E-120 | 0.726188453 | 0.773 | 0.386 |
| SH3D19     | 1.39E-119 | 0.721473804 | 0.921 | 0.616 |
| PREX2      | 1.39E-119 | 0.68058636  | 0.526 | 0.159 |
| RDH10      | 2.19E-119 | 0.697542505 | 0.643 | 0.25  |
| CPQ        | 1.05E-117 | 0.706356948 | 0.939 | 0.693 |
| ZFP36L2    | 1.64E-117 | 0.766442764 | 0.978 | 0.755 |
| QSOX1      | 1.67E-117 | 0.662136074 | 0.84  | 0.48  |
| RTN4       | 6.39E-117 | 0.704959348 | 0.986 | 0.846 |
| MFAP5      | 8.62E-117 | 0.946740321 | 0.888 | 0.536 |

|          |           |             |       |       |
|----------|-----------|-------------|-------|-------|
| MYOC     | 2.27E-116 | 1.322968145 | 0.459 | 0.118 |
| SCPEP1   | 2.36E-116 | 0.651604062 | 0.855 | 0.512 |
| GALNT15  | 8.24E-116 | 1.185421496 | 0.651 | 0.3   |
| FGL2     | 1.72E-113 | 0.604229146 | 0.549 | 0.181 |
| DPYSL2   | 2.29E-113 | 0.587770036 | 0.89  | 0.604 |
| SETBP1   | 3.35E-113 | 0.716093955 | 0.84  | 0.45  |
| NAALADL2 | 1.90E-112 | 0.817934699 | 0.85  | 0.515 |
| CLEC3B   | 2.92E-112 | 0.746837293 | 0.55  | 0.171 |
| RNASE4   | 5.45E-112 | 0.676572154 | 0.844 | 0.477 |
| MAN1A1   | 2.23E-109 | 0.792909361 | 0.925 | 0.647 |
| HIF3A    | 5.05E-108 | 0.59337732  | 0.482 | 0.142 |
| PSAP     | 1.05E-107 | 0.590288956 | 0.991 | 0.839 |
| SAMHD1   | 1.08E-107 | 0.725212766 | 0.822 | 0.5   |
| PLXDC2   | 1.49E-107 | 0.827471829 | 0.974 | 0.664 |
| SCN7A    | 2.22E-106 | 0.85452904  | 0.55  | 0.19  |
| C1QTNF3  | 2.72E-106 | 0.572556975 | 0.784 | 0.343 |
| PDZRN4   | 2.82E-106 | 1.745928225 | 0.646 | 0.326 |
| SRGAP1   | 1.07E-105 | 0.7519761   | 0.883 | 0.563 |
| CADM3    | 3.85E-105 | 0.564868824 | 0.521 | 0.156 |
| HELLPAR  | 8.82E-105 | 0.71934236  | 0.525 | 0.174 |
| RORA     | 3.39E-104 | 0.759114145 | 0.986 | 0.779 |
| OAF      | 5.04E-104 | 0.511269988 | 0.827 | 0.436 |
| ALDH2    | 2.95E-103 | 0.536271495 | 0.816 | 0.403 |
| FXYD1    | 5.77E-103 | 0.495440205 | 0.891 | 0.453 |
| FHL1     | 6.97E-103 | 0.622851342 | 0.903 | 0.523 |
| IL15RA   | 9.64E-103 | 0.481048817 | 0.607 | 0.239 |
| DIAPH2   | 1.81E-102 | 0.663001681 | 0.899 | 0.647 |
| NAV3     | 4.55E-102 | 0.950105572 | 0.804 | 0.478 |
| CYP1B1   | 6.53E-102 | 0.694789444 | 0.59  | 0.223 |
| KCNT2    | 6.86E-102 | 0.788796564 | 0.61  | 0.258 |
| CHRM3    | 2.60E-101 | 0.849143616 | 0.463 | 0.152 |
| SOD3     | 8.95E-101 | 0.731035866 | 0.956 | 0.596 |
| CD302    | 9.69E-101 | 0.58715381  | 0.782 | 0.439 |
| SH3BP5   | 2.36E-100 | 0.565143899 | 0.851 | 0.523 |
| CBLB     | 3.54E-100 | 0.711733254 | 0.928 | 0.667 |
| PBX1     | 3.92E-100 | 0.687011856 | 0.938 | 0.699 |
| CYP4B1   | 3.21E-99  | 0.6340383   | 0.405 | 0.102 |
| PMP22    | 4.99E-99  | 0.555696122 | 0.973 | 0.759 |
| IL18     | 7.45E-99  | 0.559632944 | 0.444 | 0.129 |
| CRYBG3   | 1.75E-98  | 0.679032066 | 0.688 | 0.355 |
| LRFN5    | 2.16E-98  | 0.743692062 | 0.442 | 0.136 |
| ESR1     | 7.71E-98  | 0.671120434 | 0.504 | 0.183 |
| EPB41L2  | 1.46E-97  | 0.626650921 | 0.941 | 0.704 |

|            |          |             |       |       |
|------------|----------|-------------|-------|-------|
| ACVRL1     | 8.44E-97 | 0.471771372 | 0.621 | 0.274 |
| MBP        | 9.72E-97 | 0.500710831 | 0.627 | 0.266 |
| DPT        | 1.47E-96 | 0.717832183 | 0.813 | 0.456 |
| TACC1      | 1.97E-96 | 0.625213269 | 0.975 | 0.749 |
| TCF21      | 6.21E-96 | 0.659089455 | 0.77  | 0.421 |
| GASK1A     | 7.49E-96 | 0.618841459 | 0.501 | 0.179 |
| MEDAG      | 3.76E-95 | 0.78314156  | 0.639 | 0.285 |
| DSCAML1    | 5.52E-95 | 0.543539489 | 0.37  | 0.09  |
| CFB        | 1.18E-94 | 0.479880833 | 0.707 | 0.341 |
| CALCRL     | 1.60E-94 | 0.856505061 | 0.572 | 0.234 |
| SSH2       | 2.42E-94 | 0.657568675 | 0.773 | 0.451 |
| MEG3       | 5.17E-94 | 0.805211522 | 0.897 | 0.577 |
| IRAK3      | 7.68E-94 | 0.594545396 | 0.759 | 0.426 |
| LINC01133  | 9.69E-94 | 0.366304021 | 0.461 | 0.136 |
| NFIX       | 1.32E-93 | 0.475239521 | 0.815 | 0.48  |
| LSP1       | 1.56E-93 | 0.378870486 | 0.746 | 0.338 |
| KANK1      | 1.70E-93 | 0.583930518 | 0.541 | 0.215 |
| ABCA9-AS1  | 3.84E-93 | 0.417664709 | 0.342 | 0.075 |
| ECHDC2     | 1.24E-92 | 0.527944277 | 0.727 | 0.381 |
| XPNPEP2    | 1.46E-92 | 0.364017323 | 0.381 | 0.097 |
| SLC19A2    | 1.93E-92 | 0.693349947 | 0.71  | 0.374 |
| FBXL7      | 2.43E-91 | 0.690430441 | 0.936 | 0.676 |
| PCNX2      | 3.07E-91 | 0.605718952 | 0.607 | 0.282 |
| AKR1C2     | 6.76E-91 | 0.419292073 | 0.576 | 0.217 |
| VEGFD      | 9.52E-91 | 0.437756003 | 0.4   | 0.107 |
| OPHN1      | 2.67E-90 | 0.618195379 | 0.608 | 0.277 |
| FAM107A    | 6.87E-90 | 0.449213041 | 0.418 | 0.12  |
| TMEM132C   | 8.70E-90 | 0.566549474 | 0.374 | 0.097 |
| AKR1C3     | 1.89E-89 | 0.419337412 | 0.614 | 0.26  |
| C7         | 2.00E-89 | 1.422501725 | 0.494 | 0.184 |
| FBLN5      | 2.46E-89 | 0.489415093 | 0.781 | 0.438 |
| GNA14      | 3.81E-89 | 0.511530845 | 0.38  | 0.102 |
| PAMR1      | 2.13E-88 | 0.56440556  | 0.562 | 0.227 |
| APLP2      | 2.70E-88 | 0.557409864 | 0.924 | 0.725 |
| CSGALNACT1 | 2.91E-88 | 0.51886499  | 0.687 | 0.329 |
| PLBD1      | 3.30E-88 | 0.440495965 | 0.602 | 0.254 |
| ATP1A1     | 5.93E-88 | 0.60959678  | 0.908 | 0.659 |
| GPRC5A     | 7.78E-88 | 0.79755296  | 0.612 | 0.282 |
| SAMD4A     | 1.16E-87 | 0.898588543 | 0.848 | 0.555 |
| ARHGAP10   | 2.64E-87 | 0.604778463 | 0.905 | 0.656 |
| GFPT2      | 6.35E-87 | 0.815854052 | 0.842 | 0.555 |
| BNC2       | 1.50E-86 | 0.526124564 | 0.969 | 0.627 |
| ITGBL1     | 1.92E-86 | 0.690895281 | 0.813 | 0.462 |

|            |          |             |       |       |
|------------|----------|-------------|-------|-------|
| LTBP3      | 1.58E-85 | 0.489703122 | 0.837 | 0.505 |
| RNF217     | 1.60E-85 | 0.636791161 | 0.689 | 0.379 |
| AC092691.1 | 2.07E-85 | 0.705441207 | 0.283 | 0.054 |
| SHISA3     | 2.22E-85 | 0.454968369 | 0.369 | 0.098 |
| SMAD3      | 2.33E-85 | 0.462792235 | 0.65  | 0.298 |
| APBB1IP    | 2.99E-85 | 0.399630107 | 0.496 | 0.181 |
| AC007319.1 | 4.68E-85 | 0.944250426 | 0.559 | 0.248 |
| CAB39L     | 1.49E-84 | 0.523800001 | 0.642 | 0.32  |
| ASPA       | 3.48E-84 | 0.372490376 | 0.345 | 0.086 |
| OSR1       | 4.87E-84 | 0.368994381 | 0.43  | 0.131 |
| EPHA6      | 5.18E-84 | 0.545579534 | 0.273 | 0.051 |
| LHFPL6     | 6.45E-84 | 0.652705751 | 0.963 | 0.786 |
| SEMA3E     | 8.42E-84 | 0.474219729 | 0.335 | 0.082 |
| ABHD5      | 1.02E-83 | 0.618595765 | 0.709 | 0.394 |
| LIMCH1     | 1.18E-83 | 0.498873664 | 0.55  | 0.23  |
| LRRK2      | 1.22E-83 | 0.366327082 | 0.416 | 0.13  |
| CYP1B1-AS1 | 1.85E-83 | 0.508525139 | 0.374 | 0.109 |
| LINC01697  | 1.95E-83 | 0.63838566  | 0.264 | 0.045 |
| OLFML3     | 3.03E-83 | 0.489053526 | 0.889 | 0.528 |
| FAT4       | 6.58E-83 | 0.536146643 | 0.548 | 0.237 |
| TNFSF13B   | 8.35E-83 | 0.558948673 | 0.522 | 0.208 |
| LEPR       | 1.19E-82 | 0.60396659  | 0.623 | 0.285 |
| MATN2      | 1.23E-82 | 0.453656766 | 0.435 | 0.142 |
| C16orf89   | 2.55E-82 | 0.47609533  | 0.369 | 0.099 |
| TMTC1      | 3.02E-82 | 0.641531641 | 0.712 | 0.379 |
| TRIOBP     | 3.81E-82 | 0.467495523 | 0.74  | 0.412 |
| FKBP5      | 5.03E-82 | 0.685732186 | 0.932 | 0.699 |
| SPRY1      | 1.06E-81 | 0.568684763 | 0.747 | 0.407 |
| NID1       | 1.65E-81 | 0.508894497 | 0.812 | 0.504 |
| IL16       | 2.19E-81 | 0.553523041 | 0.573 | 0.258 |
| MEIS1      | 7.09E-81 | 0.650687286 | 0.837 | 0.542 |
| SYNE1      | 7.35E-81 | 0.686462172 | 0.939 | 0.7   |
| ADAM33     | 1.22E-80 | 0.474333859 | 0.555 | 0.233 |
| FIBIN      | 1.39E-80 | 0.652356475 | 0.708 | 0.4   |
| FAXDC2     | 1.98E-80 | 0.386249274 | 0.444 | 0.155 |
| EEF2K      | 7.25E-80 | 0.47299964  | 0.525 | 0.219 |
| PDK4       | 1.35E-79 | 0.53509863  | 0.678 | 0.316 |
| PLAGL1     | 1.63E-79 | 0.610100253 | 0.758 | 0.442 |
| NPC2       | 2.64E-79 | 0.450687915 | 0.94  | 0.706 |
| SOX5       | 3.14E-79 | 0.347522867 | 0.95  | 0.67  |
| ELF1       | 1.35E-78 | 0.596264322 | 0.904 | 0.673 |
| ARL15      | 1.70E-78 | 0.65960257  | 0.762 | 0.469 |
| BOC        | 4.03E-78 | 0.523457451 | 0.594 | 0.287 |

|            |          |             |       |       |
|------------|----------|-------------|-------|-------|
| AL139383.1 | 5.25E-78 | 0.553868465 | 0.35  | 0.1   |
| SNED1      | 1.23E-77 | 0.854581825 | 0.719 | 0.436 |
| EHBP1      | 1.25E-77 | 0.662268087 | 0.806 | 0.535 |
| ASAP2      | 1.50E-77 | 0.520817258 | 0.684 | 0.362 |
| AGAP1      | 1.68E-77 | 0.670119113 | 0.842 | 0.584 |
| ANXA1      | 1.98E-77 | 0.623375688 | 0.981 | 0.835 |
| HIGD1A     | 2.42E-77 | 0.421531274 | 0.743 | 0.438 |
| LAMC1      | 2.45E-77 | 0.584797367 | 0.903 | 0.666 |
| LIMA1      | 3.99E-77 | 0.455915005 | 0.912 | 0.653 |
| FLRT2      | 8.90E-77 | 0.539346957 | 0.651 | 0.334 |
| GLUL       | 9.80E-77 | 0.548029013 | 0.912 | 0.682 |
| EPHX1      | 1.31E-76 | 0.477553615 | 0.788 | 0.46  |
| KIAA0408   | 3.43E-76 | 0.453518353 | 0.41  | 0.14  |
| TIMP3      | 3.71E-76 | 0.548152441 | 0.988 | 0.842 |
| AFF1       | 4.07E-76 | 0.555519442 | 0.825 | 0.544 |
| PARD3      | 9.64E-76 | 0.511072683 | 0.916 | 0.669 |
| LINC02511  | 1.74E-75 | 0.859324367 | 0.29  | 0.07  |
| ADAMTS15   | 1.95E-75 | 0.474218529 | 0.342 | 0.096 |
| FEZ1       | 2.27E-75 | 0.464041133 | 0.745 | 0.451 |
| FILIP1     | 3.25E-75 | 0.508253337 | 0.737 | 0.4   |
| PLCB1      | 3.91E-75 | 0.630081756 | 0.838 | 0.55  |
| SULT1A1    | 3.99E-75 | 0.31792926  | 0.41  | 0.134 |
| LINC02802  | 7.10E-75 | 0.493323526 | 0.725 | 0.416 |
| MSR1       | 7.46E-75 | 0.544468265 | 0.257 | 0.051 |
| RECK       | 8.02E-75 | 0.444958239 | 0.682 | 0.371 |
| FSTL1      | 1.33E-74 | 0.577938281 | 0.975 | 0.795 |
| SGCG       | 2.20E-74 | 0.379639876 | 0.355 | 0.103 |
| STK32B     | 2.99E-74 | 0.447850628 | 0.328 | 0.092 |
| FTX        | 3.18E-74 | 0.626787681 | 0.952 | 0.74  |
| MCUB       | 7.70E-74 | 0.433548399 | 0.655 | 0.335 |
| HMCN2      | 1.11E-73 | 0.486732565 | 0.395 | 0.133 |
| GHR        | 1.78E-73 | 0.546986013 | 0.581 | 0.29  |
| CCDC69     | 2.78E-73 | 0.273253095 | 0.465 | 0.173 |
| VIPR2      | 3.05E-73 | 0.402741072 | 0.371 | 0.114 |
| CYB5A      | 4.21E-73 | 0.484461437 | 0.84  | 0.568 |
| DENND2A    | 4.28E-73 | 0.422923396 | 0.541 | 0.234 |
| DST        | 4.54E-73 | 0.461950696 | 0.982 | 0.802 |
| LVRN       | 8.26E-73 | 0.343042796 | 0.279 | 0.062 |
| C17orf58   | 1.34E-72 | 0.396037779 | 0.49  | 0.194 |
| OSR2       | 1.35E-72 | 0.58971022  | 0.619 | 0.318 |
| CREG1      | 2.38E-72 | 0.415407388 | 0.786 | 0.488 |
| LINC01140  | 7.51E-72 | 0.346990782 | 0.45  | 0.163 |
| PRNP       | 1.12E-71 | 0.415352642 | 0.832 | 0.554 |

|         |          |             |       |       |
|---------|----------|-------------|-------|-------|
| PCSK6   | 1.37E-71 | 0.440156461 | 0.349 | 0.105 |
| NCOA1   | 1.92E-71 | 0.554609022 | 0.877 | 0.643 |
| ALDH1A3 | 4.22E-71 | 0.515533907 | 0.538 | 0.242 |
| PIEZO2  | 6.01E-71 | 0.630541708 | 0.5   | 0.219 |
| WNT2B   | 1.42E-70 | 0.43895766  | 0.489 | 0.205 |
| FMO2    | 1.56E-70 | 0.783474932 | 0.446 | 0.176 |
| TNFSF10 | 2.50E-70 | 0.361356483 | 0.765 | 0.414 |
| REV3L   | 2.54E-70 | 0.545440123 | 0.892 | 0.637 |
| FGFR1   | 3.06E-70 | 0.475931824 | 0.892 | 0.648 |
| VSIR    | 3.70E-70 | 0.359282076 | 0.619 | 0.292 |
| PRKAG2  | 3.84E-70 | 0.421354527 | 0.566 | 0.269 |
| TENT5A  | 4.77E-70 | 0.636372482 | 0.805 | 0.536 |
| ITM2B   | 9.57E-70 | 0.409767475 | 0.988 | 0.908 |
| RHOBTB3 | 1.19E-69 | 0.54977373  | 0.921 | 0.703 |
| GSTM5   | 1.50E-69 | 0.389704294 | 0.494 | 0.202 |
| SASH1   | 1.96E-69 | 0.401837121 | 0.727 | 0.413 |
| PHGDH   | 2.42E-69 | 0.410887513 | 0.545 | 0.247 |
| SESTD1  | 3.40E-69 | 0.517053231 | 0.816 | 0.541 |
| PXDC1   | 3.48E-69 | 0.580384164 | 0.718 | 0.448 |
| PTPRS   | 3.59E-69 | 0.447609006 | 0.637 | 0.352 |
| PLAAT4  | 8.95E-69 | 0.352360204 | 0.735 | 0.403 |
| PTGFR   | 1.05E-68 | 0.327762608 | 0.355 | 0.112 |
| C1RL    | 1.42E-68 | 0.449057495 | 0.662 | 0.363 |
| ACKR3   | 1.49E-68 | 0.627623779 | 0.695 | 0.398 |
| FGF2    | 1.95E-68 | 0.402750188 | 0.513 | 0.223 |
| BDH2    | 2.10E-68 | 0.396077341 | 0.765 | 0.478 |
| ZNF385A | 2.23E-68 | 0.259658009 | 0.522 | 0.219 |
| NIPAL2  | 3.72E-68 | 0.562624811 | 0.432 | 0.171 |
| PPL     | 1.25E-67 | 0.378644896 | 0.444 | 0.174 |
| ABL1    | 1.67E-67 | 0.560874045 | 0.857 | 0.608 |
| SPTLC3  | 2.13E-67 | 0.281446055 | 0.25  | 0.055 |
| CTSF    | 3.33E-67 | 0.486317734 | 0.776 | 0.496 |
| BCHE    | 3.42E-67 | 0.353881059 | 0.336 | 0.101 |
| DOCK4   | 3.91E-67 | 0.636906991 | 0.782 | 0.507 |
| PLEKHA6 | 5.49E-67 | 0.329324734 | 0.374 | 0.124 |
| DAAM1   | 1.32E-66 | 0.534668153 | 0.781 | 0.499 |
| MAN1C1  | 2.02E-66 | 0.322734146 | 0.442 | 0.17  |
| SEMA6A  | 2.77E-66 | 0.400361864 | 0.349 | 0.112 |
| ARHGEF3 | 6.10E-66 | 0.523724932 | 0.551 | 0.272 |
| RAMP2   | 9.76E-66 | 0.365400197 | 0.427 | 0.157 |
| WWP1    | 2.47E-65 | 0.480177085 | 0.668 | 0.389 |
| ACSS3   | 3.37E-65 | 0.431572003 | 0.468 | 0.2   |
| PALM    | 4.58E-65 | 0.333038958 | 0.531 | 0.24  |

|            |          |             |       |       |
|------------|----------|-------------|-------|-------|
| LINC01798  | 5.46E-65 | 0.467595618 | 0.363 | 0.128 |
| CTSH       | 7.42E-65 | 0.425027456 | 0.649 | 0.35  |
| CDON       | 9.96E-65 | 0.333902405 | 0.306 | 0.088 |
| ARL6IP5    | 3.09E-64 | 0.392042603 | 0.949 | 0.761 |
| BMERB1     | 3.41E-64 | 0.432261082 | 0.811 | 0.532 |
| SLC16A4    | 4.19E-64 | 0.322056122 | 0.465 | 0.195 |
| APOD       | 4.74E-64 | 0.774537687 | 0.496 | 0.213 |
| BICC1      | 4.79E-64 | 0.420971932 | 0.933 | 0.635 |
| AKAP12     | 9.11E-64 | 0.476397001 | 0.894 | 0.626 |
| CEP126     | 9.93E-64 | 0.374438249 | 0.442 | 0.176 |
| MAML2      | 1.18E-63 | 0.612099631 | 0.918 | 0.691 |
| NAMPT      | 1.46E-63 | 0.743083573 | 0.894 | 0.721 |
| RUNX1T1    | 1.58E-63 | 0.593434749 | 0.749 | 0.485 |
| NPR1       | 1.87E-63 | 0.283131075 | 0.342 | 0.105 |
| GREM2      | 2.09E-63 | 0.411757056 | 0.392 | 0.144 |
| BHMT2      | 2.24E-63 | 0.301005359 | 0.378 | 0.133 |
| CLIP4      | 4.69E-63 | 0.357077933 | 0.473 | 0.206 |
| RBMS3-AS2  | 4.97E-63 | 0.372164268 | 0.396 | 0.149 |
| CBR3       | 6.79E-63 | 0.44613945  | 0.565 | 0.281 |
| EMILIN2    | 7.21E-63 | 0.427882772 | 0.45  | 0.194 |
| TNFAIP8L3  | 1.06E-62 | 0.368369512 | 0.433 | 0.168 |
| TBC1D12    | 1.32E-62 | 0.39625963  | 0.604 | 0.331 |
| AC008105.3 | 4.07E-62 | 0.268523277 | 0.304 | 0.086 |
| JADE1      | 4.42E-62 | 0.36314851  | 0.575 | 0.278 |
| OLFML1     | 5.82E-62 | 0.351815283 | 0.627 | 0.336 |
| PROCR      | 1.22E-61 | 0.465881153 | 0.549 | 0.274 |
| SSC5D      | 2.21E-61 | 0.349738706 | 0.603 | 0.306 |
| SLC16A7    | 2.28E-61 | 0.493676159 | 0.575 | 0.303 |
| PCYOX1     | 3.15E-61 | 0.338772455 | 0.71  | 0.423 |
| ROR1       | 3.98E-61 | 0.473903368 | 0.642 | 0.348 |
| ADGRB3     | 6.31E-61 | 0.612002624 | 0.417 | 0.165 |
| GNG11      | 6.45E-61 | 0.400132659 | 0.858 | 0.595 |
| MIR100HG   | 6.64E-61 | 0.386802367 | 0.733 | 0.434 |
| NDRG1      | 9.76E-61 | 0.359643444 | 0.823 | 0.538 |
| AUTS2      | 2.40E-60 | 0.447418088 | 0.962 | 0.734 |
| SDCBP      | 3.50E-60 | 0.452324907 | 0.899 | 0.72  |
| RGL1       | 5.01E-60 | 0.338120916 | 0.494 | 0.218 |
| TMEM176B   | 1.11E-59 | 0.417333001 | 0.912 | 0.616 |
| AP001528.1 | 1.14E-59 | 0.369192534 | 0.467 | 0.202 |
| STXBP6     | 2.81E-59 | 0.46138034  | 0.394 | 0.155 |
| APP        | 2.93E-59 | 0.435417294 | 0.967 | 0.809 |
| ZNF704     | 3.64E-59 | 0.364304885 | 0.602 | 0.304 |
| ITGA9      | 5.25E-59 | 0.319131235 | 0.332 | 0.109 |



|             |          |             |       |       |
|-------------|----------|-------------|-------|-------|
| BACH2       | 6.72E-59 | 0.444287596 | 0.707 | 0.431 |
| KIAA1328    | 6.93E-59 | 0.488820276 | 0.615 | 0.342 |
| P2RX2       | 7.89E-59 | 0.281885762 | 0.313 | 0.093 |
| STEAP2      | 1.16E-58 | 0.421099604 | 0.701 | 0.412 |
| RGMA        | 1.25E-58 | 0.338902093 | 0.446 | 0.189 |
| FER         | 1.25E-58 | 0.461534442 | 0.812 | 0.558 |
| LPCAT2      | 3.24E-58 | 0.754486017 | 0.523 | 0.283 |
| MAGI2       | 4.22E-58 | 0.525576892 | 0.798 | 0.551 |
| PTGES       | 4.98E-58 | 0.305572387 | 0.448 | 0.182 |
| RBMS1       | 5.00E-58 | 0.434881441 | 0.947 | 0.767 |
| AC124852.1  | 5.85E-58 | 0.327210943 | 0.315 | 0.101 |
| GPSM2       | 8.02E-58 | 0.326194625 | 0.442 | 0.19  |
| CLIC2       | 1.96E-57 | 0.301567623 | 0.469 | 0.202 |
| BMP4        | 2.96E-57 | 0.427794124 | 0.604 | 0.326 |
| AL356124.1  | 3.13E-57 | 0.34064993  | 0.339 | 0.121 |
| ROBO3       | 4.05E-57 | 0.356232802 | 0.394 | 0.157 |
| NPDC1       | 6.79E-57 | 0.278337315 | 0.652 | 0.346 |
| PTPRG       | 7.79E-57 | 0.603937051 | 0.957 | 0.77  |
| MAGI3       | 9.71E-57 | 0.493617192 | 0.66  | 0.396 |
| RHOU        | 1.08E-56 | 0.316776507 | 0.375 | 0.142 |
| CUTC        | 2.11E-56 | 0.367672719 | 0.544 | 0.282 |
| TMEM176A    | 2.77E-56 | 0.375776946 | 0.845 | 0.549 |
| AL109930.1  | 6.24E-56 | 0.376498392 | 0.433 | 0.19  |
| SLC25A37    | 1.22E-55 | 0.39317931  | 0.642 | 0.37  |
| MYO9A       | 1.40E-55 | 0.390806794 | 0.778 | 0.513 |
| THRB        | 3.08E-55 | 0.394225    | 0.499 | 0.241 |
| KLHL13      | 3.34E-55 | 0.348509118 | 0.347 | 0.122 |
| ARHGAP6     | 3.76E-55 | 0.325761543 | 0.621 | 0.323 |
| PRKN        | 4.61E-55 | 0.440230746 | 0.605 | 0.337 |
| FAM198B-AS1 | 5.81E-55 | 0.354481853 | 0.344 | 0.127 |
| ARHGAP26    | 7.10E-55 | 0.3878457   | 0.65  | 0.359 |
| MED13L      | 1.16E-54 | 0.456825484 | 0.942 | 0.741 |
| FBXO42      | 1.37E-54 | 0.438732414 | 0.532 | 0.287 |
| CYP27A1     | 1.41E-54 | 0.315284768 | 0.496 | 0.237 |
| PITPNM2     | 1.95E-54 | 0.281408847 | 0.302 | 0.097 |
| C1QTNF7     | 5.45E-54 | 0.377453018 | 0.412 | 0.169 |
| NR2F1       | 5.89E-54 | 0.461116033 | 0.639 | 0.371 |
| NFKBIZ      | 8.57E-54 | 0.553337063 | 0.884 | 0.682 |
| PTX3        | 1.06E-53 | 0.810989426 | 0.29  | 0.094 |
| WIF1        | 1.24E-53 | 0.746067672 | 0.254 | 0.072 |
| FAIM2       | 1.41E-53 | 0.26290526  | 0.277 | 0.082 |
| CD81        | 1.47E-53 | 0.393638892 | 0.987 | 0.895 |
| LINC00278   | 2.09E-53 | 0.37222467  | 0.271 | 0.082 |

|            |          |             |       |       |
|------------|----------|-------------|-------|-------|
| IFIT1      | 3.55E-53 | 0.301854064 | 0.504 | 0.235 |
| F10        | 3.63E-53 | 0.557247237 | 0.595 | 0.346 |
| ITGB8      | 4.03E-53 | 0.39530592  | 0.366 | 0.142 |
| S100A13    | 5.73E-53 | 0.323233606 | 0.943 | 0.704 |
| HPGD       | 8.62E-53 | 0.601298944 | 0.394 | 0.165 |
| NTN4       | 9.49E-53 | 0.420587577 | 0.567 | 0.289 |
| PLD3       | 1.08E-52 | 0.369083843 | 0.881 | 0.646 |
| LITAF      | 1.24E-52 | 0.400231598 | 0.873 | 0.629 |
| PXN        | 1.26E-52 | 0.379005551 | 0.458 | 0.223 |
| VPS13B     | 1.40E-52 | 0.371016161 | 0.897 | 0.663 |
| ABHD15-AS1 | 1.42E-52 | 0.285362582 | 0.256 | 0.075 |
| CDKN2C     | 1.51E-52 | 0.302563184 | 0.515 | 0.257 |
| PIR        | 4.12E-52 | 0.264101994 | 0.315 | 0.109 |
| PKD2       | 4.83E-52 | 0.421975385 | 0.732 | 0.481 |
| ERRF11     | 4.92E-52 | 0.36693008  | 0.799 | 0.539 |
| ACKR4      | 5.11E-52 | 0.314018184 | 0.335 | 0.124 |
| MEG8       | 5.64E-52 | 0.773378341 | 0.677 | 0.426 |
| GAS1       | 8.51E-52 | 0.627188406 | 0.712 | 0.448 |
| DYNC2H1    | 8.52E-52 | 0.366011561 | 0.599 | 0.333 |
| SPSB1      | 9.64E-52 | 0.474817134 | 0.749 | 0.516 |
| ARHGAP29   | 1.02E-51 | 0.380029631 | 0.615 | 0.332 |
| LDB2       | 1.10E-51 | 0.417425871 | 0.683 | 0.409 |
| FAM227B    | 1.72E-51 | 0.315378133 | 0.304 | 0.108 |
| DHRS3      | 1.79E-51 | 0.34751141  | 0.604 | 0.318 |
| NUPR1      | 4.06E-51 | 0.36241361  | 0.957 | 0.783 |
| KITLG      | 5.14E-51 | 0.329508983 | 0.655 | 0.39  |
| CC2D2A     | 5.21E-51 | 0.353832666 | 0.514 | 0.268 |
| ARHGAP21   | 6.40E-51 | 0.407185465 | 0.836 | 0.614 |
| ZHX3       | 8.00E-51 | 0.40513035  | 0.692 | 0.443 |
| TMOD2      | 1.14E-50 | 0.287351165 | 0.304 | 0.106 |
| MYC        | 1.21E-50 | 0.289813199 | 0.65  | 0.371 |
| SSPN       | 1.52E-50 | 0.408152279 | 0.857 | 0.608 |
| PNRC1      | 1.75E-50 | 0.527103765 | 0.958 | 0.841 |
| N4BP2L2    | 1.91E-50 | 0.332451421 | 0.935 | 0.742 |
| ARHGEF26   | 4.71E-50 | 0.339322199 | 0.341 | 0.131 |
| DDAH2      | 5.45E-50 | 0.288893947 | 0.874 | 0.634 |
| PPP3CA     | 5.93E-50 | 0.538280211 | 0.843 | 0.618 |
| FIGN       | 7.19E-50 | 0.432603351 | 0.419 | 0.194 |
| FAM172A    | 8.65E-50 | 0.365105902 | 0.801 | 0.561 |
| CSF1       | 1.67E-49 | 0.29339352  | 0.559 | 0.301 |
| FAM110B    | 1.77E-49 | 0.386451205 | 0.494 | 0.254 |
| SPOCK1     | 2.13E-49 | 0.463559713 | 0.625 | 0.376 |
| NNMT       | 2.16E-49 | 0.48629258  | 0.99  | 0.852 |

|            |          |             |       |       |
|------------|----------|-------------|-------|-------|
| FAM180A    | 4.23E-49 | 0.33456187  | 0.427 | 0.195 |
| ARHGAP12   | 9.23E-49 | 0.357013595 | 0.613 | 0.373 |
| VAT1       | 1.03E-48 | 0.304384015 | 0.703 | 0.447 |
| CRLF1      | 2.33E-48 | 0.374971673 | 0.317 | 0.115 |
| TMEM35B    | 3.91E-48 | 0.31993548  | 0.728 | 0.474 |
| PAM        | 4.26E-48 | 0.390750523 | 0.946 | 0.731 |
| PBX3       | 5.18E-48 | 0.366666438 | 0.832 | 0.592 |
| APOL1      | 7.68E-48 | 0.278451666 | 0.574 | 0.311 |
| MN1        | 9.30E-48 | 0.279887671 | 0.421 | 0.197 |
| EEA1       | 1.17E-47 | 0.375110985 | 0.832 | 0.617 |
| BDKRB2     | 1.84E-47 | 0.330930038 | 0.344 | 0.135 |
| LGALS3     | 2.40E-47 | 0.325032091 | 0.98  | 0.845 |
| RNF13      | 2.57E-47 | 0.288589729 | 0.706 | 0.462 |
| GRK5       | 3.00E-47 | 0.334048398 | 0.722 | 0.443 |
| ZNF638     | 3.07E-47 | 0.326609132 | 0.861 | 0.637 |
| GREB1      | 3.18E-47 | 0.278827656 | 0.263 | 0.085 |
| BLVRB      | 3.37E-47 | 0.261089621 | 0.787 | 0.54  |
| WSB1       | 3.53E-47 | 0.373126564 | 0.958 | 0.784 |
| AC079298.3 | 5.30E-47 | 0.558186752 | 0.418 | 0.199 |
| EPHA3      | 5.50E-47 | 0.4577311   | 0.517 | 0.27  |
| APOL3      | 5.87E-47 | 0.265716802 | 0.385 | 0.168 |
| TCF7L2     | 6.63E-47 | 0.349330713 | 0.802 | 0.578 |
| TWIST2     | 8.54E-47 | 0.334204111 | 0.675 | 0.407 |
| NR3C2      | 1.35E-46 | 0.311412178 | 0.4   | 0.174 |
| EMP1       | 1.45E-46 | 0.515985071 | 0.911 | 0.682 |
| ANG        | 1.47E-46 | 0.303531818 | 0.481 | 0.244 |
| AGTR1      | 2.86E-46 | 0.262338721 | 0.39  | 0.174 |
| BST1       | 3.46E-46 | 0.270528381 | 0.405 | 0.182 |
| PGRMC2     | 3.83E-46 | 0.265734526 | 0.722 | 0.486 |
| TMEM72-AS1 | 8.23E-46 | 0.522839153 | 0.271 | 0.092 |
| FHIT       | 1.22E-45 | 0.476049341 | 0.492 | 0.267 |
| CPED1      | 1.31E-45 | 0.364589601 | 0.582 | 0.334 |
| ABHD14A    | 2.54E-45 | 0.257211749 | 0.499 | 0.258 |
| KLF9       | 2.84E-45 | 0.315574203 | 0.927 | 0.734 |
| HGF        | 2.96E-45 | 0.251158441 | 0.36  | 0.154 |
| TPST1      | 3.00E-45 | 0.416671381 | 0.805 | 0.57  |
| CFLAR      | 3.25E-45 | 0.288489737 | 0.735 | 0.494 |
| AC005237.1 | 3.90E-45 | 0.32978185  | 0.319 | 0.126 |
| SCP2       | 4.11E-45 | 0.292216551 | 0.868 | 0.667 |
| GLI3       | 5.22E-45 | 0.32754694  | 0.793 | 0.556 |
| CPNE3      | 5.33E-45 | 0.296317972 | 0.762 | 0.528 |
| ZFPM2-AS1  | 6.32E-45 | 0.404475643 | 0.642 | 0.391 |
| SH3PXD2B   | 6.99E-45 | 0.47336379  | 0.831 | 0.587 |

|            |          |             |       |       |
|------------|----------|-------------|-------|-------|
| CCNL1      | 8.15E-45 | 0.441076324 | 0.906 | 0.738 |
| GULP1      | 8.70E-45 | 0.474819465 | 0.735 | 0.501 |
| DIO3OS     | 1.27E-44 | 0.264365124 | 0.304 | 0.113 |
| CD74       | 1.95E-44 | 0.256932431 | 0.635 | 0.394 |
| CADPS2     | 2.39E-44 | 0.447674179 | 0.713 | 0.49  |
| PCDH17     | 2.84E-44 | 0.374222371 | 0.254 | 0.083 |
| FAM13A     | 3.44E-44 | 0.399250472 | 0.705 | 0.474 |
| DAPK1      | 3.44E-44 | 0.279744193 | 0.342 | 0.141 |
| AL033523.1 | 4.45E-44 | 0.474157111 | 0.262 | 0.092 |
| SPART      | 4.85E-44 | 0.255799191 | 0.729 | 0.49  |
| ITPKC      | 5.15E-44 | 0.335585334 | 0.411 | 0.203 |
| EXT1       | 6.93E-44 | 0.49826915  | 0.881 | 0.68  |
| SYTL4      | 7.61E-44 | 0.276914992 | 0.35  | 0.148 |
| RASSF4     | 1.12E-43 | 0.275712024 | 0.382 | 0.172 |
| TANK       | 1.35E-43 | 0.29702626  | 0.744 | 0.51  |
| LINC01266  | 2.32E-43 | 0.434290201 | 0.317 | 0.13  |
| ZNF106     | 3.10E-43 | 0.351515569 | 0.742 | 0.521 |
| DANT2      | 3.24E-43 | 0.477913491 | 0.452 | 0.241 |
| EPS15      | 4.33E-43 | 0.317946935 | 0.746 | 0.512 |
| ENOSF1     | 4.74E-43 | 0.305144987 | 0.526 | 0.294 |
| IGFBP4     | 4.87E-43 | 0.554555485 | 0.982 | 0.864 |
| ACACB      | 5.33E-43 | 0.31994602  | 0.475 | 0.243 |
| PDZRN3     | 5.75E-43 | 0.380663046 | 0.851 | 0.611 |
| ST3GAL1    | 7.19E-43 | 0.325156517 | 0.586 | 0.359 |
| MOB3B      | 1.03E-42 | 0.387319325 | 0.488 | 0.253 |
| SGCE       | 1.26E-42 | 0.261253608 | 0.697 | 0.448 |
| ADH5       | 1.77E-42 | 0.308237407 | 0.859 | 0.672 |
| GPRC5D-AS1 | 1.81E-42 | 0.633767942 | 0.282 | 0.109 |
| WARS2-AS1  | 2.09E-42 | 0.317112535 | 0.369 | 0.167 |
| PAK3       | 2.97E-42 | 0.310742849 | 0.347 | 0.15  |
| UGDH       | 2.99E-42 | 0.427616022 | 0.759 | 0.54  |
| TBC1D5     | 4.37E-42 | 0.357071713 | 0.799 | 0.582 |
| TSC22D3    | 5.22E-42 | 0.352463264 | 0.94  | 0.742 |
| GSTM3      | 5.83E-42 | 0.262173944 | 0.805 | 0.58  |
| F3         | 8.93E-42 | 0.259795942 | 0.542 | 0.293 |
| GPC3       | 9.28E-42 | 0.412869652 | 0.269 | 0.097 |
| IRF2BP2    | 9.45E-42 | 0.293565522 | 0.757 | 0.531 |
| SAV1       | 1.15E-41 | 0.310123881 | 0.628 | 0.403 |
| SEMA3B     | 1.76E-41 | 0.282783434 | 0.39  | 0.181 |
| PRX        | 1.78E-41 | 0.297311087 | 0.253 | 0.087 |
| CITED2     | 2.11E-41 | 0.472968867 | 0.687 | 0.452 |
| CHPT1      | 3.27E-41 | 0.310204599 | 0.629 | 0.402 |
| MIPOL1     | 3.38E-41 | 0.295897926 | 0.404 | 0.19  |

|            |          |             |       |       |
|------------|----------|-------------|-------|-------|
| PDLIM1     | 4.57E-41 | 0.28422105  | 0.876 | 0.669 |
| CD248      | 5.91E-41 | 0.345282303 | 0.736 | 0.504 |
| AC098829.1 | 8.07E-41 | 0.729602236 | 0.356 | 0.168 |
| AHR        | 1.02E-40 | 0.473306312 | 0.807 | 0.574 |
| MBD5       | 1.23E-40 | 0.354851934 | 0.785 | 0.566 |
| OSBPL9     | 1.59E-40 | 0.410024086 | 0.786 | 0.592 |
| INTS6      | 1.85E-40 | 0.620792604 | 0.754 | 0.578 |
| LAMB2      | 1.89E-40 | 0.313118427 | 0.766 | 0.538 |
| MLH3       | 2.08E-40 | 0.280925713 | 0.47  | 0.248 |
| FAM43A     | 3.68E-40 | 0.318161848 | 0.435 | 0.219 |
| MPZL1      | 4.74E-40 | 0.292381255 | 0.822 | 0.609 |
| HMCN1      | 6.43E-40 | 0.351877614 | 0.586 | 0.348 |
| TSPAN4     | 6.92E-40 | 0.271904613 | 0.879 | 0.629 |
| PDE4C      | 8.06E-40 | 0.769713262 | 0.35  | 0.165 |
| FGD5       | 1.00E-39 | 0.271592862 | 0.315 | 0.135 |
| SRSF5      | 1.36E-39 | 0.257911224 | 0.951 | 0.785 |
| TMBIM4     | 1.61E-39 | 0.257257785 | 0.914 | 0.73  |
| ANKAR      | 1.78E-39 | 0.33301567  | 0.34  | 0.152 |
| ALPK1      | 1.79E-39 | 0.304998247 | 0.447 | 0.233 |
| EXOC6B     | 2.20E-39 | 0.307663399 | 0.731 | 0.505 |
| LGALS3BP   | 2.34E-39 | 0.264241336 | 0.957 | 0.766 |
| FOXN3      | 2.45E-39 | 0.345018135 | 0.917 | 0.727 |
| SOD2       | 2.63E-39 | 0.711222637 | 0.927 | 0.79  |
| AHNAK      | 3.02E-39 | 0.30678914  | 0.972 | 0.842 |
| C2         | 4.72E-39 | 0.307839678 | 0.627 | 0.4   |
| NLGN4Y     | 4.79E-39 | 0.302449894 | 0.335 | 0.147 |
| LRRK1      | 8.60E-39 | 0.394443    | 0.453 | 0.249 |
| HEXA       | 1.94E-38 | 0.289213678 | 0.704 | 0.493 |
| GMDS-DT    | 2.10E-38 | 0.429518393 | 0.526 | 0.315 |
| MEIS2      | 2.43E-38 | 0.373936465 | 0.847 | 0.623 |
| PDE7A      | 2.92E-38 | 0.277122473 | 0.51  | 0.293 |
| ASAP3      | 3.79E-38 | 0.255960728 | 0.347 | 0.16  |
| CHD9       | 3.99E-38 | 0.321800579 | 0.865 | 0.674 |
| C5orf56    | 6.28E-38 | 0.28995706  | 0.55  | 0.325 |
| SLC25A13   | 9.22E-38 | 0.329890129 | 0.475 | 0.269 |
| CTSO       | 1.10E-37 | 0.261869859 | 0.597 | 0.372 |
| TRPC1      | 1.35E-37 | 0.337628375 | 0.581 | 0.366 |
| TMEM100    | 1.51E-37 | 0.25270204  | 0.273 | 0.106 |
| POGLUT3    | 1.93E-37 | 0.262587812 | 0.571 | 0.357 |
| SDCCAG8    | 2.46E-37 | 0.312228733 | 0.687 | 0.464 |
| LONRF3     | 2.52E-37 | 0.359443239 | 0.296 | 0.123 |
| CA12       | 2.65E-37 | 0.433791519 | 0.387 | 0.197 |
| GAS7       | 2.98E-37 | 0.261121558 | 0.735 | 0.476 |

|            |          |             |       |       |
|------------|----------|-------------|-------|-------|
| RAI2       | 6.70E-37 | 0.29648615  | 0.487 | 0.267 |
| UGGT2      | 7.49E-37 | 0.348586659 | 0.684 | 0.482 |
| HIVEP1     | 8.45E-37 | 0.325875581 | 0.604 | 0.383 |
| GLRX       | 8.92E-37 | 0.287153276 | 0.723 | 0.524 |
| ITIH5      | 9.58E-37 | 0.372709542 | 0.498 | 0.277 |
| ZHX2       | 9.73E-37 | 0.279704217 | 0.71  | 0.471 |
| GASK1B     | 1.31E-36 | 0.304989969 | 0.624 | 0.412 |
| DENND1A    | 1.34E-36 | 0.282575523 | 0.577 | 0.351 |
| IMMP2L     | 1.60E-36 | 0.300192429 | 0.796 | 0.592 |
| AZI2       | 1.74E-36 | 0.326709191 | 0.681 | 0.477 |
| AASS       | 1.82E-36 | 0.290639516 | 0.581 | 0.362 |
| AUH        | 1.86E-36 | 0.277127481 | 0.517 | 0.302 |
| EVC2       | 1.86E-36 | 0.25406473  | 0.398 | 0.203 |
| CD55       | 1.97E-36 | 0.378840674 | 0.812 | 0.61  |
| CDKN1C     | 2.10E-36 | 0.344582989 | 0.785 | 0.558 |
| RFX2       | 4.16E-36 | 0.447856971 | 0.561 | 0.346 |
| AL078604.4 | 6.73E-36 | 1.019637728 | 0.502 | 0.31  |
| LTBP2      | 8.88E-36 | 0.359735283 | 0.594 | 0.369 |
| TOR1AIP1   | 1.16E-35 | 0.257449934 | 0.629 | 0.42  |
| NGF        | 1.66E-35 | 0.262422019 | 0.294 | 0.122 |
| TMEM108    | 2.71E-35 | 0.367007201 | 0.336 | 0.157 |
| MRNIP      | 6.91E-35 | 0.295717046 | 0.464 | 0.256 |
| NFATC2     | 7.14E-35 | 0.56558102  | 0.568 | 0.359 |
| WWOX       | 8.10E-35 | 0.361150287 | 0.816 | 0.61  |
| AHI1       | 9.46E-35 | 0.266429991 | 0.83  | 0.601 |
| CACHD1     | 1.03E-34 | 0.322169891 | 0.488 | 0.28  |
| MAOA       | 1.39E-34 | 0.264090517 | 0.335 | 0.157 |
| AKAP13     | 1.70E-34 | 0.296359336 | 0.982 | 0.821 |
| BCKDHB     | 1.75E-34 | 0.519939126 | 0.558 | 0.363 |
| UCHL1      | 1.98E-34 | 0.273405227 | 0.482 | 0.274 |
| FNDC3B     | 2.17E-34 | 0.33496529  | 0.982 | 0.8   |
| NAV1       | 3.24E-34 | 0.285690628 | 0.698 | 0.48  |
| REXO2      | 3.62E-34 | 0.273368669 | 0.894 | 0.712 |
| CACNB2     | 6.93E-34 | 0.318914383 | 0.598 | 0.365 |
| DIAPH2-AS1 | 8.39E-34 | 0.301320221 | 0.29  | 0.128 |
| MAPK9      | 8.82E-34 | 0.674371595 | 0.457 | 0.276 |
| PTPN13     | 1.07E-33 | 0.302856213 | 0.575 | 0.372 |
| FAM171A1   | 4.46E-33 | 0.263399342 | 0.354 | 0.175 |
| EYA4       | 4.52E-33 | 0.323444519 | 0.337 | 0.166 |
| DUSP1      | 5.13E-33 | 0.359297264 | 0.971 | 0.848 |
| DSE        | 9.71E-33 | 0.312747946 | 0.679 | 0.476 |
| LINC01504  | 1.24E-32 | 0.297464019 | 0.371 | 0.192 |
| LAPTM4A    | 1.69E-32 | 0.276520676 | 0.963 | 0.856 |

|            |          |             |       |       |
|------------|----------|-------------|-------|-------|
| CCDC18-AS1 | 3.19E-32 | 0.325392239 | 0.46  | 0.269 |
| LRIG3      | 3.74E-32 | 0.270312265 | 0.465 | 0.271 |
| G0S2       | 6.99E-32 | 0.532798278 | 0.35  | 0.173 |
| DENND4C    | 8.26E-32 | 0.29246163  | 0.625 | 0.426 |
| IL6        | 9.17E-32 | 0.26762183  | 0.327 | 0.154 |
| AC004160.1 | 9.46E-32 | 0.258709306 | 0.571 | 0.348 |
| CMYA5      | 9.64E-32 | 0.270795063 | 0.353 | 0.178 |
| SLC4A7     | 1.11E-31 | 0.268307936 | 0.688 | 0.481 |
| UTY        | 1.11E-31 | 0.271688296 | 0.457 | 0.261 |
| ARHGEF10   | 1.37E-31 | 0.273516043 | 0.535 | 0.334 |
| PPM1B      | 1.56E-31 | 0.257579377 | 0.569 | 0.365 |
| STIM1      | 1.61E-31 | 0.254789611 | 0.563 | 0.358 |
| TRMT11     | 2.28E-31 | 0.276521253 | 0.539 | 0.338 |
| RAD51B     | 3.04E-31 | 0.347651669 | 0.537 | 0.342 |
| BBS9       | 3.72E-31 | 0.319759238 | 0.627 | 0.424 |
| RIN2       | 3.77E-31 | 0.263104031 | 0.781 | 0.56  |
| PTGS2      | 4.59E-31 | 0.391058922 | 0.298 | 0.138 |
| SESN1      | 4.61E-31 | 0.264679665 | 0.612 | 0.406 |
| BDKRB1     | 6.20E-31 | 0.339055794 | 0.319 | 0.152 |
| ANKS1B     | 6.71E-31 | 0.417046901 | 0.34  | 0.171 |
| ANTXR2     | 1.42E-30 | 0.258731557 | 0.694 | 0.493 |
| NR2F1-AS1  | 1.63E-30 | 0.262665591 | 0.519 | 0.32  |
| RUFY3      | 1.73E-30 | 0.281823509 | 0.693 | 0.495 |
| HIBADH     | 1.96E-30 | 0.279894701 | 0.499 | 0.31  |
| ARID5B     | 2.76E-30 | 0.323960949 | 0.959 | 0.823 |
| GTF2B      | 3.08E-30 | 0.337431896 | 0.604 | 0.417 |
| LRRC23     | 4.26E-30 | 0.60126147  | 0.52  | 0.362 |
| HIPK3      | 5.31E-30 | 0.284473635 | 0.76  | 0.573 |
| MRTFA      | 6.22E-30 | 0.3032433   | 0.837 | 0.646 |
| STARD9     | 1.01E-29 | 0.258352923 | 0.486 | 0.295 |
| TRERF1     | 1.07E-29 | 0.255624529 | 0.442 | 0.256 |
| RFTN2      | 1.11E-29 | 0.263328974 | 0.399 | 0.222 |
| MID1       | 3.96E-29 | 0.266919447 | 0.482 | 0.278 |
| BAZ2B      | 4.15E-29 | 0.28528535  | 0.755 | 0.551 |
| NFKB1      | 9.81E-29 | 0.46435927  | 0.792 | 0.605 |
| SCAPER     | 1.09E-28 | 0.270629346 | 0.591 | 0.407 |
| PNISR      | 1.16E-28 | 0.275744228 | 0.837 | 0.672 |
| TXLNG      | 2.73E-28 | 0.256890868 | 0.492 | 0.3   |
| SLC10A1    | 1.17E-27 | 0.293736822 | 0.286 | 0.14  |
| MITF       | 1.30E-27 | 0.311871726 | 0.665 | 0.464 |
| ADAMTS17   | 1.41E-27 | 0.268994013 | 0.253 | 0.114 |
| ATP10D     | 2.09E-27 | 0.286202545 | 0.542 | 0.362 |
| SPRED2     | 2.38E-27 | 0.299966693 | 0.546 | 0.366 |

|              |          |             |       |       |
|--------------|----------|-------------|-------|-------|
| RORA-AS1     | 2.99E-27 | 0.258558966 | 0.327 | 0.171 |
| SMG6         | 6.77E-27 | 0.272945834 | 0.68  | 0.49  |
| FHOD3        | 8.64E-27 | 0.317744886 | 0.534 | 0.351 |
| LINC01473    | 9.22E-27 | 0.325525816 | 0.533 | 0.343 |
| FST          | 1.39E-26 | 0.413481754 | 0.3   | 0.149 |
| PRKCE        | 1.90E-26 | 0.264858995 | 0.556 | 0.363 |
| FNIP2        | 2.08E-26 | 0.314583315 | 0.603 | 0.421 |
| RSRP1        | 2.11E-26 | 0.254076883 | 0.81  | 0.644 |
| PDE1A        | 2.31E-26 | 0.354794363 | 0.519 | 0.336 |
| AC012404.1   | 4.28E-26 | 0.255661703 | 0.365 | 0.207 |
| SQSTM1       | 5.28E-26 | 0.288480305 | 0.974 | 0.845 |
| POLG2        | 7.66E-26 | 0.313567981 | 0.499 | 0.326 |
| B4GALT1      | 9.63E-26 | 0.316924642 | 0.804 | 0.627 |
| ADAMTSL4-AS1 | 9.72E-26 | 0.307194911 | 0.632 | 0.438 |
| ATF6         | 1.28E-25 | 0.372138723 | 0.665 | 0.506 |
| KDM3B        | 1.43E-25 | 0.294035005 | 0.491 | 0.318 |
| TTC17        | 4.72E-25 | 0.254510887 | 0.641 | 0.473 |
| WTAP         | 4.74E-25 | 0.390651762 | 0.828 | 0.687 |
| EIF1B        | 1.15E-24 | 0.295642158 | 0.799 | 0.632 |
| AC022217.3   | 1.41E-24 | 0.368525509 | 0.504 | 0.336 |
| TULP2        | 2.96E-24 | 0.270447872 | 0.472 | 0.301 |
| AL365295.1   | 3.23E-24 | 0.333999093 | 0.304 | 0.164 |
| ADM          | 5.50E-24 | 0.297597005 | 0.575 | 0.385 |
| PRKCG        | 1.14E-23 | 0.364684661 | 0.262 | 0.13  |
| PRICKLE2     | 1.27E-23 | 0.290271577 | 0.711 | 0.522 |
| ZC3HAV1      | 1.42E-23 | 0.383800305 | 0.719 | 0.553 |
| SLC9A1       | 2.46E-23 | 0.267216274 | 0.401 | 0.245 |
| SYN3         | 2.49E-23 | 0.284038529 | 0.334 | 0.183 |
| CAMK2N1      | 3.14E-23 | 0.314622029 | 0.665 | 0.486 |
| TAF4B        | 4.08E-23 | 0.269261304 | 0.338 | 0.192 |
| GALNT17      | 4.53E-23 | 0.370675568 | 0.292 | 0.154 |
| TSC22D2      | 1.26E-22 | 0.391508904 | 0.654 | 0.505 |
| SLC41A2      | 3.88E-22 | 0.269137567 | 0.388 | 0.236 |
| ZFP36L1      | 6.72E-22 | 0.32500999  | 0.935 | 0.813 |
| LHFPL2       | 7.89E-22 | 0.416256066 | 0.61  | 0.445 |
| GCH1         | 8.45E-22 | 0.275928845 | 0.332 | 0.19  |
| SMIM41       | 1.47E-21 | 0.306016817 | 0.295 | 0.163 |
| THBS1        | 4.40E-21 | 0.397967849 | 0.771 | 0.631 |
| DEPP1        | 5.43E-21 | 0.447778281 | 0.513 | 0.36  |
| ELL2         | 5.46E-21 | 0.287123262 | 0.82  | 0.643 |
| H19          | 1.26E-20 | 0.253698044 | 0.271 | 0.141 |
| THUMPD3-AS1  | 1.27E-20 | 0.286364936 | 0.535 | 0.38  |
| MMP19        | 1.43E-20 | 0.311503505 | 0.465 | 0.308 |



|           |          |             |       |       |
|-----------|----------|-------------|-------|-------|
| CPE       | 1.54E-20 | 0.446962141 | 0.711 | 0.591 |
| NFATC1    | 3.24E-20 | 0.685712961 | 0.491 | 0.349 |
| PDE4D     | 1.17E-19 | 0.320744003 | 0.712 | 0.54  |
| CES1      | 2.23E-19 | 0.317848875 | 0.377 | 0.236 |
| CAMK2D    | 6.72E-19 | 0.301116663 | 0.78  | 0.626 |
| DPH6      | 2.71E-18 | 0.252296287 | 0.363 | 0.228 |
| AMPD3     | 3.01E-18 | 0.464331902 | 0.261 | 0.15  |
| HECTD2    | 4.71E-18 | 0.263282956 | 0.418 | 0.28  |
| SEMA4A    | 9.31E-18 | 0.47713426  | 0.446 | 0.308 |
| TNFRSF10B | 1.50E-17 | 0.254138165 | 0.432 | 0.298 |
| ULK4      | 2.14E-17 | 0.287514734 | 0.406 | 0.271 |
| BIN3      | 1.64E-16 | 0.409738167 | 0.466 | 0.344 |
| UGP2      | 2.33E-16 | 0.250016847 | 0.741 | 0.611 |
| CCN2      | 3.56E-16 | 0.402137179 | 0.821 | 0.656 |
| TNFAIP6   | 5.95E-16 | 0.355588505 | 0.699 | 0.535 |
| ABTB2     | 8.27E-16 | 0.56060442  | 0.393 | 0.275 |
| A2M       | 1.03E-15 | 0.710827626 | 0.592 | 0.481 |
| PTGDS     | 1.78E-15 | 0.480301644 | 0.373 | 0.245 |
| PLEKHG2   | 2.76E-15 | 0.414259523 | 0.399 | 0.293 |
| SLC39A14  | 6.07E-15 | 0.254447756 | 0.581 | 0.45  |
| SCLT1     | 9.01E-14 | 0.257094903 | 0.479 | 0.35  |
| TMTC2     | 2.61E-13 | 0.292389078 | 0.439 | 0.323 |
| SUPT5H    | 1.65E-12 | 0.414862215 | 0.476 | 0.381 |
| SLC25A44  | 2.11E-12 | 0.312573658 | 0.281 | 0.185 |
| GBE1      | 6.49E-12 | 0.304735802 | 0.576 | 0.461 |
| PMF1      | 1.96E-11 | 0.280973251 | 0.569 | 0.462 |
| RAB7A     | 8.13E-10 | 0.340485418 | 0.875 | 0.783 |
| ICAM1     | 1.28E-09 | 0.395862128 | 0.449 | 0.365 |
| CXCL2     | 2.31E-09 | 0.579580925 | 0.354 | 0.269 |
| ACSL4     | 8.60E-08 | 0.27763423  | 0.51  | 0.428 |
| COL11A1   | 0        | 2.897416091 | 0.754 | 0.049 |
| COL1A1    | 0        | 2.89239161  | 0.991 | 0.845 |
| POSTN     | 0        | 2.553988904 | 0.856 | 0.181 |
| KIF26B    | 0        | 2.468651512 | 0.765 | 0.099 |
| INHBA     | 0        | 2.214768096 | 0.852 | 0.274 |
| COL5A1    | 0        | 1.880057403 | 0.957 | 0.575 |
| COL10A1   | 0        | 1.838369672 | 0.7   | 0.065 |
| WNT5A     | 0        | 1.741353227 | 0.772 | 0.125 |
| GREM1     | 0        | 1.705182591 | 0.835 | 0.128 |
| RUNX2     | 0        | 1.701950796 | 0.777 | 0.097 |
| CDH11     | 0        | 1.598941474 | 0.92  | 0.312 |
| SDC1      | 0        | 1.18795188  | 0.607 | 0.04  |
| PLPP4     | 0        | 0.999528699 | 0.612 | 0.026 |

|            |           |             |       |       |
|------------|-----------|-------------|-------|-------|
| ADAM12     | 8.18E-307 | 1.492945193 | 0.726 | 0.12  |
| MMP11      | 2.99E-306 | 3.028267184 | 0.743 | 0.145 |
| TANC2      | 6.61E-303 | 1.733852425 | 0.861 | 0.256 |
| COL3A1     | 1.78E-299 | 2.490618644 | 0.989 | 0.843 |
| COL12A1    | 3.58E-299 | 2.116305976 | 0.97  | 0.67  |
| COL1A2     | 6.56E-298 | 2.209699989 | 0.999 | 0.894 |
| COL5A2     | 6.86E-294 | 1.723131032 | 0.992 | 0.776 |
| RAI14      | 3.80E-293 | 1.348768205 | 0.823 | 0.215 |
| TMEM158    | 3.63E-289 | 1.527706661 | 0.679 | 0.105 |
| PTK7       | 8.74E-285 | 1.153800137 | 0.811 | 0.227 |
| LOXL2      | 6.27E-280 | 1.392237939 | 0.77  | 0.163 |
| CTHRC1     | 1.42E-277 | 2.071409917 | 0.873 | 0.347 |
| TENM3      | 2.94E-274 | 1.541519775 | 0.732 | 0.156 |
| SUGCT      | 2.69E-269 | 1.405957534 | 0.815 | 0.231 |
| CSMD2      | 4.97E-264 | 1.154504894 | 0.575 | 0.065 |
| DSG2       | 2.07E-262 | 0.754420209 | 0.52  | 0.041 |
| MIR181A1HG | 3.27E-261 | 0.863377137 | 0.511 | 0.038 |
| UNC5B      | 5.16E-256 | 0.837270737 | 0.54  | 0.052 |
| CASC15     | 1.46E-253 | 1.506496913 | 0.873 | 0.298 |
| PRDM1      | 2.08E-252 | 1.121553922 | 0.661 | 0.116 |
| ADAMTS12   | 3.12E-250 | 1.331713495 | 0.758 | 0.185 |
| COL7A1     | 7.92E-249 | 1.372393229 | 0.566 | 0.073 |
| FAP        | 1.42E-248 | 1.316524416 | 0.914 | 0.419 |
| PODNL1     | 4.47E-248 | 0.72304179  | 0.521 | 0.05  |
| GJA1       | 1.41E-247 | 1.347816961 | 0.787 | 0.246 |
| SLC16A3    | 1.99E-247 | 0.949220867 | 0.641 | 0.11  |
| NXN        | 2.92E-247 | 1.331908591 | 0.846 | 0.282 |
| NREP       | 1.41E-245 | 1.11725232  | 0.766 | 0.205 |
| MME        | 2.33E-243 | 1.076674012 | 0.516 | 0.048 |
| HMGA2      | 3.56E-242 | 0.938733314 | 0.457 | 0.028 |
| CHST11     | 4.37E-236 | 1.597804464 | 0.828 | 0.293 |
| NTM        | 1.69E-234 | 1.673595296 | 0.855 | 0.343 |
| COL27A1    | 2.20E-234 | 0.920674793 | 0.615 | 0.101 |
| HS3ST3A1   | 6.48E-234 | 1.164634606 | 0.65  | 0.125 |
| LRRC15     | 3.85E-233 | 0.621904524 | 0.413 | 0.017 |
| COL6A3     | 3.76E-232 | 1.555255902 | 0.986 | 0.732 |
| RNF144A    | 2.70E-231 | 0.966629881 | 0.63  | 0.116 |
| ZNF469     | 1.81E-230 | 0.694401949 | 0.511 | 0.056 |
| NRP2       | 5.54E-229 | 0.915056215 | 0.683 | 0.151 |
| THBS2      | 6.00E-229 | 1.486134192 | 0.942 | 0.539 |
| SLC24A2    | 5.53E-222 | 0.842755066 | 0.375 | 0.01  |
| RUNX1      | 3.81E-221 | 1.492725964 | 0.928 | 0.474 |
| MMP14      | 3.27E-216 | 1.308058201 | 0.83  | 0.37  |

|           |           |             |       |       |
|-----------|-----------|-------------|-------|-------|
| GALNT5    | 4.64E-213 | 0.659554912 | 0.481 | 0.052 |
| FN1       | 9.23E-211 | 1.890421757 | 0.989 | 0.854 |
| ANTXR1    | 2.37E-208 | 1.338036815 | 0.947 | 0.65  |
| HECW1     | 4.40E-208 | 0.822865112 | 0.425 | 0.032 |
| MICAL2    | 5.35E-208 | 1.159541337 | 0.758 | 0.23  |
| LINC01429 | 3.36E-207 | 0.537552714 | 0.353 | 0.01  |
| DCBLD1    | 5.64E-207 | 0.856591414 | 0.621 | 0.13  |
| LINC01705 | 6.31E-205 | 1.102036414 | 0.366 | 0.014 |
| CHN1      | 2.38E-204 | 0.940512592 | 0.806 | 0.273 |
| FARP1     | 2.02E-203 | 1.058719795 | 0.864 | 0.375 |
| SERPINH1  | 4.30E-200 | 1.375270329 | 0.893 | 0.573 |
| APBA2     | 7.73E-198 | 0.614569105 | 0.49  | 0.064 |
| CNN2      | 1.92E-197 | 0.812939707 | 0.737 | 0.23  |
| VCAN      | 1.99E-195 | 1.454022581 | 0.947 | 0.693 |
| CCN4      | 4.03E-194 | 0.765011752 | 0.622 | 0.139 |
| GOLM1     | 9.31E-193 | 1.111205871 | 0.839 | 0.399 |
| MARCKS    | 1.25E-191 | 1.218521954 | 0.947 | 0.709 |
| LMO7      | 2.82E-190 | 0.793400281 | 0.659 | 0.177 |
| CDC42EP3  | 1.95E-187 | 0.791473315 | 0.49  | 0.07  |
| ARL4C     | 4.43E-187 | 1.232597128 | 0.751 | 0.275 |
| TSPAN5    | 1.56E-186 | 1.107585172 | 0.771 | 0.27  |
| LMCD1     | 7.45E-186 | 1.207201101 | 0.737 | 0.239 |
| PMEPA1    | 1.31E-185 | 1.023536662 | 0.884 | 0.442 |
| DIO2      | 7.32E-185 | 1.271845126 | 0.707 | 0.212 |
| SPHK1     | 3.02E-184 | 0.96518789  | 0.668 | 0.201 |
| SPARC     | 3.86E-184 | 1.500814756 | 0.975 | 0.906 |
| SPATS2L   | 2.37E-183 | 1.232451596 | 0.944 | 0.676 |
| C1QTNF6   | 3.28E-181 | 0.532927188 | 0.476 | 0.069 |
| CDH2      | 6.58E-180 | 0.570501023 | 0.34  | 0.017 |
| FSCN1     | 5.54E-179 | 0.759445823 | 0.685 | 0.215 |
| IL7R      | 7.34E-179 | 1.119333666 | 0.517 | 0.091 |
| CADM1     | 2.32E-178 | 1.075528591 | 0.463 | 0.068 |
| PDGFC     | 2.71E-178 | 1.090465457 | 0.713 | 0.237 |
| GPR176    | 4.91E-175 | 0.896332706 | 0.6   | 0.146 |
| NETO1     | 4.97E-175 | 0.966384886 | 0.341 | 0.021 |
| BASP1     | 8.80E-175 | 0.78713807  | 0.809 | 0.298 |
| MFAP2     | 9.98E-175 | 0.959042187 | 0.766 | 0.328 |
| PTPRE     | 3.25E-174 | 0.770859481 | 0.602 | 0.14  |
| COL6A1    | 2.38E-173 | 1.449581955 | 0.979 | 0.857 |
| RFX8      | 5.80E-172 | 0.732895184 | 0.397 | 0.044 |
| ACTN1     | 7.66E-172 | 1.003175341 | 0.845 | 0.355 |
| SOX4      | 4.16E-170 | 1.276937989 | 0.856 | 0.413 |
| HHIP      | 2.84E-169 | 0.922759075 | 0.375 | 0.035 |

|           |           |             |       |       |
|-----------|-----------|-------------|-------|-------|
| PLOD2     | 5.63E-169 | 1.329805137 | 0.866 | 0.448 |
| GJB2      | 7.78E-169 | 0.776006755 | 0.409 | 0.048 |
| ADAMTS14  | 1.58E-167 | 0.697991903 | 0.421 | 0.056 |
| TANC1     | 1.76E-167 | 0.97055824  | 0.696 | 0.218 |
| CHST15    | 1.32E-165 | 0.586517257 | 0.525 | 0.103 |
| ADAMTS2   | 2.21E-165 | 1.081419055 | 0.876 | 0.471 |
| GLIS3     | 1.16E-164 | 1.258387887 | 0.827 | 0.341 |
| ALPK2     | 1.86E-164 | 0.486224785 | 0.345 | 0.026 |
| EGFL6     | 2.88E-164 | 0.989552133 | 0.548 | 0.116 |
| TGFBI     | 5.06E-164 | 1.047655712 | 0.67  | 0.2   |
| MYO10     | 2.41E-163 | 0.75472753  | 0.636 | 0.169 |
| PPFIBP1   | 2.82E-162 | 1.022460724 | 0.902 | 0.555 |
| SPATA13   | 5.03E-162 | 1.043349791 | 0.654 | 0.209 |
| CALU      | 2.79E-161 | 0.942803786 | 0.954 | 0.779 |
| MMP1      | 3.91E-161 | 2.518799878 | 0.411 | 0.056 |
| LINC00511 | 4.06E-159 | 0.915952908 | 0.425 | 0.064 |
| RCN3      | 1.90E-158 | 0.937758799 | 0.88  | 0.573 |
| LINC01929 | 5.42E-158 | 0.546370021 | 0.313 | 0.018 |
| KIAA1217  | 8.76E-158 | 1.249254089 | 0.818 | 0.399 |
| ENTPD7    | 1.68E-157 | 0.479365153 | 0.45  | 0.074 |
| GPM6B     | 2.51E-156 | 0.876420221 | 0.459 | 0.08  |
| MYH9      | 8.65E-155 | 0.873964563 | 0.936 | 0.58  |
| STK17B    | 1.07E-154 | 0.517086783 | 0.675 | 0.204 |
| TCF4      | 1.51E-153 | 1.00951047  | 0.972 | 0.751 |
| SULF2     | 1.63E-153 | 0.779633424 | 0.696 | 0.247 |
| SULF1     | 2.10E-153 | 1.225887884 | 0.962 | 0.713 |
| AOPEP     | 3.57E-152 | 1.010557217 | 0.931 | 0.604 |
| PLAU      | 4.61E-152 | 1.445432928 | 0.651 | 0.235 |
| MMP13     | 5.91E-152 | 1.738168704 | 0.303 | 0.019 |
| ITGB5     | 3.23E-151 | 0.940065062 | 0.903 | 0.572 |
| VSNL1     | 8.46E-150 | 0.341388107 | 0.318 | 0.023 |
| PYCR1     | 1.01E-149 | 0.491635232 | 0.525 | 0.124 |
| EPST11    | 2.22E-149 | 0.730480512 | 0.698 | 0.252 |
| TTYH3     | 3.65E-149 | 0.466615665 | 0.431 | 0.074 |
| SYNDIG1   | 1.29E-148 | 0.547172873 | 0.397 | 0.057 |
| CD82      | 2.22E-146 | 0.768311818 | 0.639 | 0.214 |
| ADAM19    | 1.15E-145 | 0.635976767 | 0.51  | 0.114 |
| TSPAN9    | 1.53E-145 | 0.721109846 | 0.713 | 0.275 |
| LEF1      | 4.37E-144 | 0.455512865 | 0.381 | 0.05  |
| SERINC2   | 2.19E-143 | 0.375376295 | 0.35  | 0.039 |
| SHISA2    | 9.45E-143 | 0.459617542 | 0.263 | 0.011 |
| P3H1      | 1.03E-141 | 0.60027355  | 0.677 | 0.252 |
| TPST2     | 1.33E-141 | 0.460856794 | 0.461 | 0.094 |

|            |           |             |       |       |
|------------|-----------|-------------|-------|-------|
| PALLD      | 1.63E-141 | 0.973857182 | 0.954 | 0.687 |
| CREB3L1    | 2.24E-141 | 0.65119233  | 0.649 | 0.229 |
| RRBP1      | 3.53E-141 | 0.772595879 | 0.949 | 0.726 |
| AC134312.5 | 1.00E-140 | 0.326042782 | 0.284 | 0.018 |
| AEBP1      | 2.60E-140 | 1.029065585 | 0.961 | 0.786 |
| CMTM4      | 3.68E-140 | 0.447760409 | 0.397 | 0.062 |
| MXRA5      | 3.87E-140 | 0.840909098 | 0.848 | 0.407 |
| COL24A1    | 1.90E-139 | 0.651174725 | 0.427 | 0.079 |
| FGD6       | 2.93E-139 | 0.564360748 | 0.467 | 0.098 |
| GSE1       | 3.72E-139 | 0.592239689 | 0.609 | 0.186 |
| SEZ6L2     | 4.66E-139 | 0.356398882 | 0.333 | 0.036 |
| FKBP10     | 1.14E-138 | 0.739353789 | 0.879 | 0.573 |
| WNT2       | 2.10E-138 | 0.629491626 | 0.444 | 0.086 |
| CHSY3      | 4.90E-138 | 0.961958485 | 0.655 | 0.219 |
| CALD1      | 1.48E-137 | 0.925719874 | 0.993 | 0.933 |
| MARCKSL1   | 5.93E-137 | 0.565240853 | 0.67  | 0.229 |
| MDFI       | 2.17E-136 | 0.360541155 | 0.354 | 0.045 |
| C4orf48    | 3.60E-135 | 0.497634495 | 0.692 | 0.252 |
| RAB31      | 6.08E-135 | 0.861555481 | 0.861 | 0.489 |
| TRIM59     | 7.92E-135 | 0.497634128 | 0.509 | 0.128 |
| SIPA1L1    | 1.60E-134 | 0.848618135 | 0.776 | 0.338 |
| SLC1A3     | 3.53E-134 | 0.724777704 | 0.405 | 0.073 |
| PMAIP1     | 1.62E-133 | 0.547953695 | 0.456 | 0.091 |
| RGS3       | 5.55E-132 | 0.613337966 | 0.521 | 0.133 |
| NKD1       | 5.82E-132 | 0.640531082 | 0.408 | 0.074 |
| KIFC3      | 1.46E-131 | 0.43674927  | 0.491 | 0.116 |
| TENM4      | 1.53E-131 | 1.022766502 | 0.767 | 0.353 |
| TMEM45A    | 1.56E-131 | 0.66762874  | 0.723 | 0.324 |
| ATXN1      | 1.64E-130 | 0.851380737 | 0.932 | 0.606 |
| CHPF       | 5.33E-130 | 0.723424781 | 0.653 | 0.257 |
| CAPZB      | 9.29E-130 | 0.707146534 | 0.957 | 0.808 |
| PRKD1      | 1.37E-129 | 0.972426935 | 0.722 | 0.295 |
| P3H4       | 1.63E-129 | 0.578583712 | 0.604 | 0.207 |
| GLIS1      | 2.08E-129 | 0.61443788  | 0.445 | 0.094 |
| FNBP1L     | 8.69E-129 | 0.665172663 | 0.608 | 0.202 |
| NRG1       | 9.85E-129 | 0.658591683 | 0.251 | 0.013 |
| CDCP1      | 1.69E-128 | 0.390356288 | 0.275 | 0.021 |
| NUAK1      | 6.53E-128 | 0.73838101  | 0.467 | 0.113 |
| SGIP1      | 5.91E-127 | 0.596866657 | 0.61  | 0.189 |
| SEPTIN11   | 6.60E-127 | 0.823703467 | 0.939 | 0.694 |
| TNFRSF12A  | 4.01E-125 | 0.925757688 | 0.683 | 0.279 |
| TEAD1      | 6.11E-125 | 0.83077398  | 0.897 | 0.549 |
| HOPX       | 2.61E-124 | 0.656326091 | 0.511 | 0.128 |

|            |           |             |       |       |
|------------|-----------|-------------|-------|-------|
| ENAH       | 5.70E-124 | 0.792187878 | 0.893 | 0.529 |
| ASAP1      | 7.09E-124 | 0.844467673 | 0.917 | 0.566 |
| TRIO       | 6.75E-123 | 1.045874884 | 0.936 | 0.653 |
| AK5        | 4.86E-122 | 0.393542088 | 0.303 | 0.034 |
| DERL3      | 6.31E-122 | 0.770080066 | 0.291 | 0.03  |
| BPGM       | 6.42E-122 | 0.582136228 | 0.535 | 0.164 |
| RALA       | 1.54E-120 | 0.647290857 | 0.807 | 0.442 |
| FRMD6      | 4.87E-120 | 0.850545895 | 0.844 | 0.472 |
| CTSB       | 1.55E-119 | 0.729113236 | 0.918 | 0.713 |
| HMGA2-AS1  | 3.87E-119 | 0.424604542 | 0.271 | 0.025 |
| MAP4K4     | 5.11E-119 | 0.751187217 | 0.894 | 0.547 |
| ZNF281     | 8.51E-119 | 0.451234378 | 0.494 | 0.133 |
| WIPF1      | 1.85E-118 | 0.645221225 | 0.776 | 0.364 |
| ACBD3      | 3.40E-118 | 0.665707235 | 0.851 | 0.53  |
| BMP1       | 3.86E-118 | 0.58825509  | 0.686 | 0.289 |
| XYLT1      | 3.90E-118 | 0.954635464 | 0.729 | 0.318 |
| SLC38A5    | 4.36E-118 | 0.375685627 | 0.373 | 0.067 |
| COL5A3     | 5.30E-118 | 1.087680185 | 0.493 | 0.146 |
| LIMS1      | 6.78E-118 | 0.742578375 | 0.933 | 0.66  |
| ZEB1       | 1.05E-117 | 0.997856395 | 0.937 | 0.693 |
| PLOD1      | 1.25E-117 | 0.570724418 | 0.628 | 0.242 |
| NKD2       | 1.97E-117 | 0.404235806 | 0.363 | 0.064 |
| FRMD5      | 2.80E-117 | 0.554944983 | 0.26  | 0.022 |
| RASGRF2    | 5.75E-117 | 0.59771536  | 0.467 | 0.121 |
| CDK14      | 7.15E-117 | 0.900572558 | 0.9   | 0.527 |
| PGM2L1     | 1.17E-116 | 0.76579744  | 0.51  | 0.153 |
| GRIP1      | 5.93E-116 | 0.652758282 | 0.354 | 0.061 |
| LOX        | 2.23E-115 | 0.701289108 | 0.719 | 0.341 |
| PTGER3     | 2.71E-115 | 0.82480251  | 0.637 | 0.251 |
| SPRED1     | 2.97E-115 | 0.792759981 | 0.764 | 0.373 |
| BGN        | 4.67E-115 | 0.852990448 | 0.927 | 0.701 |
| VGLL4      | 1.14E-114 | 0.73899224  | 0.857 | 0.535 |
| TWIST1     | 1.27E-114 | 0.863105573 | 0.876 | 0.567 |
| ST6GALNAC5 | 5.69E-114 | 0.910783636 | 0.512 | 0.152 |
| GPX7       | 1.52E-113 | 0.51106955  | 0.549 | 0.18  |
| APBB2      | 3.04E-113 | 0.822347428 | 0.902 | 0.564 |
| STMN1      | 3.06E-113 | 0.496122051 | 0.526 | 0.156 |
| STARD4-AS1 | 2.60E-112 | 0.353194607 | 0.324 | 0.049 |
| FUT8       | 3.06E-112 | 0.653375136 | 0.769 | 0.372 |
| PRRX1      | 1.07E-111 | 0.788257011 | 0.93  | 0.721 |
| PDPN       | 2.78E-111 | 0.696714897 | 0.839 | 0.468 |
| NRIP1      | 3.55E-111 | 0.751958031 | 0.862 | 0.475 |
| TNFRSF6B   | 6.05E-111 | 0.599058059 | 0.423 | 0.101 |

|             |           |             |       |       |
|-------------|-----------|-------------|-------|-------|
| ETV1        | 1.78E-110 | 0.450359311 | 0.467 | 0.123 |
| SLC6A6      | 2.18E-110 | 0.362096724 | 0.362 | 0.067 |
| P4HB        | 2.42E-110 | 0.759366114 | 0.923 | 0.762 |
| JCAD        | 2.76E-110 | 0.417178688 | 0.457 | 0.118 |
| AC015923.1  | 4.01E-110 | 0.370089517 | 0.304 | 0.043 |
| CDYL2       | 6.71E-110 | 0.329792891 | 0.28  | 0.034 |
| EVA1A       | 2.38E-109 | 0.28254655  | 0.281 | 0.034 |
| MDFIC       | 2.96E-109 | 0.52549873  | 0.71  | 0.318 |
| RCN1        | 3.09E-109 | 0.610921604 | 0.871 | 0.639 |
| KCND2       | 1.39E-108 | 1.433358197 | 0.701 | 0.333 |
| STRA6       | 1.89E-108 | 0.357227624 | 0.286 | 0.036 |
| SEC31A      | 2.67E-108 | 0.632340731 | 0.938 | 0.711 |
| ITGB1       | 2.74E-108 | 0.663694555 | 0.968 | 0.845 |
| CCBE1       | 4.42E-108 | 0.778444963 | 0.334 | 0.059 |
| SPECC1      | 5.47E-108 | 0.287387292 | 0.551 | 0.156 |
| FOXQ1       | 1.18E-107 | 0.434853636 | 0.316 | 0.05  |
| MIR4435-2HG | 2.07E-107 | 0.822176109 | 0.81  | 0.441 |
| PCDH7       | 4.35E-107 | 1.004213967 | 0.809 | 0.432 |
| SLC9A3R2    | 5.12E-107 | 0.554026218 | 0.65  | 0.269 |
| CD109       | 2.70E-106 | 0.548032259 | 0.628 | 0.252 |
| EMILIN1     | 2.91E-106 | 0.666430996 | 0.855 | 0.496 |
| ETV6        | 3.38E-106 | 0.692178578 | 0.851 | 0.45  |
| TPM4        | 3.47E-106 | 0.722420117 | 0.943 | 0.817 |
| SURF4       | 5.96E-106 | 0.564450273 | 0.843 | 0.521 |
| MSX2        | 1.34E-105 | 0.366507348 | 0.298 | 0.044 |
| COL8A1      | 2.47E-105 | 0.959433762 | 0.902 | 0.588 |
| MYO5A       | 3.56E-105 | 0.502283423 | 0.52  | 0.165 |
| RAB2A       | 4.26E-104 | 0.575771315 | 0.947 | 0.785 |
| SIPA1L3     | 8.61E-104 | 0.525491713 | 0.539 | 0.179 |
| AGPAT4      | 9.85E-104 | 0.814629047 | 0.667 | 0.287 |
| MCC         | 2.87E-103 | 0.790015817 | 0.775 | 0.407 |
| VOPP1       | 1.20E-102 | 0.489259298 | 0.702 | 0.326 |
| ARMC9       | 3.40E-102 | 0.607573703 | 0.54  | 0.189 |
| DCBLD2      | 6.77E-102 | 0.734781291 | 0.666 | 0.304 |
| S100A16     | 2.17E-101 | 0.624608453 | 0.781 | 0.45  |
| LINC00632   | 2.25E-101 | 0.41059232  | 0.542 | 0.186 |
| TMEM132A    | 8.07E-101 | 0.297652046 | 0.317 | 0.055 |
| SLC24A3     | 8.21E-101 | 0.797915006 | 0.603 | 0.237 |
| COL6A6      | 1.18E-100 | 0.411613118 | 0.27  | 0.036 |
| TCF12       | 1.43E-100 | 0.735840857 | 0.952 | 0.695 |
| TMEM200A    | 3.07E-100 | 0.263659576 | 0.268 | 0.034 |
| NEK6        | 1.07E-99  | 0.35007028  | 0.48  | 0.143 |
| SHB         | 1.10E-99  | 0.415219232 | 0.451 | 0.124 |

|            |          |             |       |       |
|------------|----------|-------------|-------|-------|
| GBP1       | 5.53E-99 | 0.910064302 | 0.655 | 0.298 |
| MYO1B      | 6.57E-99 | 0.567714576 | 0.75  | 0.352 |
| TYMP       | 7.21E-99 | 0.754728345 | 0.855 | 0.531 |
| LMAN1      | 7.69E-99 | 0.649804326 | 0.894 | 0.682 |
| IDH2       | 8.42E-99 | 0.35477419  | 0.557 | 0.192 |
| ZNF608     | 1.01E-98 | 0.477807311 | 0.424 | 0.115 |
| NID2       | 1.05E-98 | 0.564946392 | 0.652 | 0.284 |
| ST5        | 1.06E-98 | 0.621455568 | 0.727 | 0.346 |
| LGALS1     | 1.31E-98 | 0.979949371 | 0.986 | 0.958 |
| FNDC1      | 2.02E-98 | 0.468064702 | 0.379 | 0.091 |
| LUZP1      | 5.21E-98 | 0.592215443 | 0.737 | 0.375 |
| ITGAV      | 9.30E-98 | 0.732812971 | 0.88  | 0.58  |
| GOLT1B     | 1.93E-97 | 0.421101414 | 0.641 | 0.272 |
| HS3ST3B1   | 2.20E-97 | 0.267183112 | 0.281 | 0.041 |
| NCOR2      | 2.89E-97 | 0.589934999 | 0.785 | 0.444 |
| KLHL5      | 4.71E-97 | 0.429369453 | 0.632 | 0.249 |
| EDIL3      | 5.61E-97 | 0.70445723  | 0.701 | 0.314 |
| P4HA3      | 1.20E-96 | 0.392777369 | 0.43  | 0.118 |
| DIP2C      | 1.47E-96 | 0.688848393 | 0.841 | 0.495 |
| ROBO1      | 1.72E-96 | 0.845311608 | 0.828 | 0.484 |
| GUCY1A1    | 3.47E-96 | 0.679246853 | 0.7   | 0.301 |
| MMD        | 3.70E-96 | 0.589111404 | 0.533 | 0.2   |
| BX284613.2 | 4.15E-96 | 0.755324612 | 0.359 | 0.083 |
| TMEM263    | 5.77E-96 | 0.61225894  | 0.852 | 0.532 |
| GFPT1      | 6.35E-96 | 0.577299521 | 0.74  | 0.374 |
| PTPN14     | 1.23E-95 | 0.530655617 | 0.606 | 0.238 |
| CTSK       | 1.96E-95 | 1.002060847 | 0.921 | 0.736 |
| PLAUR      | 2.96E-95 | 0.575702879 | 0.686 | 0.33  |
| C1orf198   | 5.82E-95 | 0.353487005 | 0.425 | 0.117 |
| HHIP-AS1   | 6.40E-95 | 0.274789112 | 0.287 | 0.046 |
| TOM1       | 1.55E-94 | 0.553228672 | 0.63  | 0.281 |
| CMTM8      | 2.18E-94 | 0.439624926 | 0.362 | 0.085 |
| OSTC       | 2.46E-94 | 0.649420943 | 0.868 | 0.691 |
| ARSI       | 3.26E-94 | 0.274715139 | 0.28  | 0.045 |
| THY1       | 1.55E-93 | 0.854625178 | 0.92  | 0.711 |
| ROR2       | 1.59E-93 | 0.74675928  | 0.752 | 0.38  |
| WHRN       | 2.57E-93 | 0.453990093 | 0.336 | 0.072 |
| CD276      | 2.70E-93 | 0.496451987 | 0.65  | 0.295 |
| GPC6       | 3.28E-93 | 1.211020131 | 0.927 | 0.715 |
| MAFB       | 3.85E-92 | 0.927534484 | 0.705 | 0.363 |
| PAWR       | 4.46E-92 | 0.464125167 | 0.564 | 0.201 |
| STAT2      | 6.26E-92 | 0.553615499 | 0.711 | 0.352 |
| DUSP10     | 1.84E-91 | 0.404572722 | 0.395 | 0.105 |



|          |          |             |       |       |
|----------|----------|-------------|-------|-------|
| MALT1    | 2.58E-91 | 0.393532958 | 0.573 | 0.217 |
| SSR3     | 4.76E-91 | 0.627679151 | 0.868 | 0.676 |
| HS2ST1   | 4.95E-91 | 0.64417841  | 0.641 | 0.276 |
| TTC39B   | 7.32E-91 | 0.491520547 | 0.538 | 0.205 |
| IKBIP    | 1.36E-90 | 0.508093859 | 0.746 | 0.425 |
| TMEFF1   | 1.40E-90 | 0.313093919 | 0.262 | 0.039 |
| KDELR3   | 4.32E-90 | 0.492556113 | 0.659 | 0.322 |
| DGKI     | 1.32E-89 | 0.64730437  | 0.399 | 0.112 |
| P4HA1    | 1.96E-89 | 0.692564506 | 0.856 | 0.561 |
| PARVA    | 5.72E-89 | 0.566127737 | 0.873 | 0.602 |
| COL6A2   | 1.52E-88 | 0.770537276 | 0.989 | 0.9   |
| ANKLE2   | 2.80E-88 | 0.432707775 | 0.637 | 0.283 |
| SEC61A1  | 3.96E-88 | 0.458400864 | 0.712 | 0.36  |
| ID1      | 7.27E-88 | 0.637295559 | 0.635 | 0.282 |
| ZFAND3   | 8.97E-88 | 0.680308184 | 0.945 | 0.673 |
| ENPP1    | 1.86E-87 | 0.391951788 | 0.322 | 0.069 |
| ANKRD28  | 2.68E-87 | 0.928377446 | 0.775 | 0.45  |
| DSEL     | 3.37E-87 | 0.59269136  | 0.648 | 0.316 |
| HDLBP    | 9.29E-87 | 0.492252096 | 0.924 | 0.693 |
| SYTL2    | 9.89E-87 | 0.415906742 | 0.5   | 0.176 |
| MAGED1   | 1.82E-86 | 0.488142392 | 0.694 | 0.353 |
| NECTIN2  | 3.24E-86 | 0.430156729 | 0.694 | 0.341 |
| HLA-B    | 6.74E-86 | 0.782085396 | 0.966 | 0.936 |
| CERCAM   | 6.78E-86 | 0.540138294 | 0.816 | 0.505 |
| DOCK5    | 1.14E-85 | 0.525420655 | 0.424 | 0.129 |
| CEMIP2   | 1.54E-85 | 0.526490867 | 0.779 | 0.412 |
| STXBP5   | 2.95E-85 | 0.682158147 | 0.725 | 0.382 |
| TTC3     | 9.02E-85 | 0.577321095 | 0.943 | 0.709 |
| OTULINL  | 1.48E-84 | 0.374825728 | 0.276 | 0.05  |
| BCAR1    | 2.16E-84 | 0.349748558 | 0.485 | 0.169 |
| CKAP4    | 2.97E-84 | 0.565313913 | 0.747 | 0.446 |
| SPON2    | 5.19E-84 | 0.993436476 | 0.921 | 0.704 |
| FAM114A1 | 6.58E-84 | 0.526451041 | 0.898 | 0.651 |
| ZNF521   | 6.61E-84 | 0.664776311 | 0.762 | 0.409 |
| DKK3     | 9.97E-84 | 0.438878523 | 0.749 | 0.363 |
| NEDD4    | 2.33E-83 | 0.613149111 | 0.594 | 0.269 |
| SMCO4    | 2.64E-83 | 0.323811441 | 0.449 | 0.145 |
| CPXM1    | 3.53E-83 | 0.255628934 | 0.489 | 0.155 |
| GOPC     | 4.53E-83 | 0.50150562  | 0.792 | 0.478 |
| PTBP3    | 6.03E-83 | 0.455504757 | 0.694 | 0.334 |
| MYH10    | 1.18E-82 | 0.572440991 | 0.65  | 0.309 |
| ABCC4    | 1.24E-82 | 0.501106981 | 0.477 | 0.17  |
| RGS17    | 2.20E-82 | 0.332502091 | 0.308 | 0.067 |

|            |          |             |       |       |
|------------|----------|-------------|-------|-------|
| OSBPL3     | 2.47E-82 | 0.406574774 | 0.329 | 0.078 |
| TAF5       | 1.81E-81 | 0.28963321  | 0.4   | 0.115 |
| YAP1       | 1.91E-81 | 0.576475447 | 0.845 | 0.503 |
| TNC        | 3.44E-81 | 0.687098596 | 0.526 | 0.194 |
| TUT7       | 4.00E-81 | 0.501756041 | 0.682 | 0.34  |
| DPY19L1    | 4.64E-81 | 0.366801791 | 0.442 | 0.147 |
| PRRC1      | 6.05E-81 | 0.389930216 | 0.609 | 0.271 |
| KDEL2      | 7.36E-81 | 0.51717056  | 0.864 | 0.668 |
| CSGALNACT2 | 7.67E-81 | 0.512732752 | 0.724 | 0.375 |
| ETS1       | 1.04E-80 | 0.427007406 | 0.703 | 0.336 |
| ITGA4      | 1.67E-80 | 0.266529851 | 0.346 | 0.086 |
| ITGA5      | 1.91E-80 | 0.869691564 | 0.704 | 0.378 |
| SHC1       | 2.31E-80 | 0.361843081 | 0.623 | 0.286 |
| CDH13      | 3.02E-80 | 0.640815962 | 0.387 | 0.109 |
| TMEM208    | 3.05E-80 | 0.474868702 | 0.735 | 0.434 |
| MOB1B      | 3.34E-80 | 0.450571766 | 0.502 | 0.186 |
| PDXDC1     | 3.71E-80 | 0.429446319 | 0.687 | 0.335 |
| RANBP17    | 6.47E-80 | 0.418460564 | 0.284 | 0.058 |
| SH3BP4     | 7.55E-80 | 0.387045546 | 0.475 | 0.167 |
| SEMA3A     | 7.94E-80 | 0.547259627 | 0.457 | 0.156 |
| WWC2       | 1.11E-79 | 0.549292952 | 0.707 | 0.365 |
| SH3RF3     | 1.36E-79 | 0.712826838 | 0.792 | 0.444 |
| PDLIM2     | 3.79E-79 | 0.588078997 | 0.835 | 0.631 |
| REEP3      | 5.03E-79 | 0.468828513 | 0.788 | 0.459 |
| MYDGF      | 5.64E-79 | 0.603464397 | 0.864 | 0.675 |
| C2orf27A   | 6.53E-79 | 0.423209284 | 0.53  | 0.213 |
| PIIB       | 6.70E-79 | 0.666771383 | 0.929 | 0.87  |
| FZD6       | 9.34E-79 | 0.345257593 | 0.41  | 0.128 |
| VMP1       | 1.28E-78 | 0.637253047 | 0.936 | 0.679 |
| TMEM167A   | 1.29E-78 | 0.444144027 | 0.797 | 0.488 |
| ABL2       | 1.35E-78 | 0.725382586 | 0.786 | 0.454 |
| KDM5B      | 2.56E-78 | 0.458185308 | 0.777 | 0.452 |
| AFAP1      | 3.23E-78 | 0.478007285 | 0.652 | 0.322 |
| SSH1       | 5.53E-78 | 0.498110666 | 0.583 | 0.266 |
| EDNRA      | 7.66E-78 | 0.423229043 | 0.516 | 0.181 |
| NHSL1      | 9.64E-78 | 0.560331758 | 0.452 | 0.164 |
| PKM        | 1.06E-77 | 0.596775236 | 0.914 | 0.8   |
| ISG15      | 3.77E-77 | 0.96425469  | 0.741 | 0.442 |
| LRRC17     | 8.59E-77 | 0.713236722 | 0.648 | 0.331 |
| BNC21      | 8.91E-77 | 0.844092501 | 0.944 | 0.65  |
| EVA1B      | 9.52E-77 | 0.490932489 | 0.802 | 0.532 |
| LAMB1      | 1.03E-76 | 0.524531812 | 0.832 | 0.48  |
| AC083870.1 | 1.13E-76 | 0.658209314 | 0.59  | 0.265 |

|          |          |             |       |       |
|----------|----------|-------------|-------|-------|
| DDAH1    | 1.25E-76 | 0.655722953 | 0.443 | 0.155 |
| SGPL1    | 1.42E-76 | 0.32616979  | 0.424 | 0.138 |
| TUBB3    | 1.52E-76 | 0.422412647 | 0.587 | 0.252 |
| MSANTD3  | 2.07E-76 | 0.340188269 | 0.568 | 0.244 |
| SMYD3    | 2.12E-76 | 0.636210844 | 0.88  | 0.564 |
| TAOK3    | 2.26E-76 | 0.599678573 | 0.801 | 0.489 |
| SERINC5  | 2.59E-76 | 0.553913772 | 0.561 | 0.241 |
| ITGA11   | 2.60E-76 | 0.666952615 | 0.683 | 0.36  |
| ZNF827   | 3.29E-76 | 0.431438046 | 0.537 | 0.214 |
| ACTR3    | 4.65E-76 | 0.458501502 | 0.835 | 0.558 |
| SEC23A   | 4.91E-76 | 0.473938372 | 0.772 | 0.439 |
| NPAS2    | 5.33E-76 | 0.559746773 | 0.473 | 0.176 |
| IGF2BP2  | 5.65E-76 | 0.555981279 | 0.707 | 0.37  |
| IRS1     | 8.90E-76 | 0.4626647   | 0.571 | 0.251 |
| BICC11   | 9.50E-76 | 0.747662777 | 0.953 | 0.64  |
| HAPLN3   | 1.48E-75 | 0.27986183  | 0.463 | 0.158 |
| MEIS3    | 2.28E-75 | 0.33192296  | 0.569 | 0.24  |
| OLFML2B  | 2.38E-75 | 0.578774511 | 0.511 | 0.212 |
| NCAM2    | 3.42E-75 | 0.711547337 | 0.423 | 0.143 |
| B4GALT2  | 3.45E-75 | 0.301281285 | 0.502 | 0.195 |
| FBLIM1   | 3.95E-75 | 0.335799655 | 0.58  | 0.239 |
| ATP2C1   | 4.52E-75 | 0.465637477 | 0.614 | 0.279 |
| SEMA5A   | 5.11E-75 | 0.581508693 | 0.495 | 0.187 |
| IL32     | 6.76E-75 | 0.63447853  | 0.835 | 0.555 |
| HOMER3   | 7.48E-75 | 0.383755207 | 0.567 | 0.25  |
| METRNL   | 7.57E-75 | 0.408912312 | 0.618 | 0.293 |
| NRXN3    | 1.14E-74 | 0.720001433 | 0.289 | 0.065 |
| GNAI1    | 1.82E-74 | 0.479623051 | 0.5   | 0.198 |
| PLEKHO1  | 1.85E-74 | 0.312381541 | 0.597 | 0.265 |
| MBOAT2   | 2.62E-74 | 0.378746713 | 0.401 | 0.129 |
| FAT1     | 2.77E-74 | 0.393266144 | 0.702 | 0.352 |
| PHTF2    | 7.39E-74 | 0.418630028 | 0.589 | 0.265 |
| CLMP     | 8.35E-74 | 0.538330514 | 0.879 | 0.554 |
| SRPK2    | 1.02E-73 | 0.462572328 | 0.861 | 0.56  |
| NT5DC2   | 1.15E-73 | 0.341815425 | 0.498 | 0.19  |
| TAP1     | 1.27E-73 | 0.340964569 | 0.506 | 0.199 |
| CHORDC1  | 1.47E-73 | 0.699303945 | 0.718 | 0.414 |
| TXNDC17  | 1.60E-73 | 0.539029395 | 0.704 | 0.421 |
| DIO2-AS1 | 2.08E-73 | 0.322386344 | 0.298 | 0.071 |
| SLC39A13 | 3.95E-73 | 0.372469503 | 0.613 | 0.287 |
| ADGRA3   | 7.27E-73 | 0.432160757 | 0.425 | 0.149 |
| ALDH18A1 | 7.48E-73 | 0.349274738 | 0.454 | 0.166 |
| FMN1     | 2.20E-72 | 0.292777401 | 0.282 | 0.063 |

|           |          |             |       |       |
|-----------|----------|-------------|-------|-------|
| LRP12     | 2.68E-72 | 0.330408369 | 0.437 | 0.154 |
| WDR27     | 5.08E-72 | 0.482749109 | 0.546 | 0.233 |
| FRS2      | 1.41E-71 | 0.472820447 | 0.684 | 0.36  |
| XAF1      | 1.72E-71 | 0.518277192 | 0.732 | 0.409 |
| ITPRIP    | 2.14E-71 | 0.442573353 | 0.471 | 0.178 |
| MIB1      | 2.38E-71 | 0.430871743 | 0.666 | 0.342 |
| SH3PXD2B1 | 3.20E-71 | 0.555941763 | 0.89  | 0.575 |
| JPT1      | 3.22E-71 | 0.371108346 | 0.62  | 0.307 |
| COLGALT1  | 3.72E-71 | 0.327529648 | 0.559 | 0.245 |
| TNS3      | 5.37E-71 | 0.53616862  | 0.436 | 0.151 |
| CLIP2     | 7.84E-71 | 0.383296537 | 0.481 | 0.182 |
| PTTG1IP   | 9.69E-71 | 0.463478665 | 0.865 | 0.637 |
| ARHGAP18  | 1.14E-70 | 0.415924932 | 0.514 | 0.209 |
| SMARCB1   | 1.42E-70 | 0.350734805 | 0.595 | 0.277 |
| OXSRI     | 2.07E-70 | 0.451410246 | 0.527 | 0.227 |
| RSAD2     | 2.18E-70 | 0.571502716 | 0.3   | 0.076 |
| CLEC11A   | 2.92E-70 | 0.514785556 | 0.824 | 0.567 |
| CLIC4     | 3.19E-70 | 0.612651326 | 0.934 | 0.709 |
| MSRB3     | 9.64E-70 | 0.37014294  | 0.831 | 0.514 |
| SLC5A3    | 9.74E-70 | 0.388363559 | 0.348 | 0.103 |
| FOXP1     | 9.80E-70 | 0.657574884 | 0.964 | 0.793 |
| ZNF532    | 1.15E-69 | 0.49018477  | 0.563 | 0.26  |
| RAB27A    | 1.20E-69 | 0.393112549 | 0.562 | 0.254 |
| UBTD1     | 1.79E-69 | 0.302641392 | 0.439 | 0.162 |
| NORAD     | 2.24E-69 | 0.479141663 | 0.879 | 0.672 |
| SNX25     | 2.89E-69 | 0.381264828 | 0.487 | 0.192 |
| SH3PXD2A  | 2.91E-69 | 0.411064889 | 0.783 | 0.466 |
| ROBO2     | 3.09E-69 | 0.516172787 | 0.46  | 0.166 |
| RASAL2    | 3.21E-69 | 0.377140997 | 0.787 | 0.418 |
| ARFGAP3   | 3.91E-69 | 0.411123453 | 0.808 | 0.492 |
| RGS4      | 3.94E-69 | 0.35579083  | 0.267 | 0.059 |
| FKBP14    | 4.29E-69 | 0.421493242 | 0.634 | 0.324 |
| C16orf87  | 6.59E-69 | 0.291902548 | 0.397 | 0.135 |
| AVEN      | 7.42E-69 | 0.304544658 | 0.514 | 0.212 |
| ADAMTS6   | 1.21E-68 | 0.584913326 | 0.304 | 0.081 |
| PRKG1     | 1.68E-68 | 0.60760403  | 0.953 | 0.668 |
| MCTP2     | 3.37E-68 | 0.461067598 | 0.428 | 0.155 |
| SCARF2    | 4.22E-68 | 0.260667725 | 0.351 | 0.105 |
| SMARCC1   | 1.22E-67 | 0.39736505  | 0.686 | 0.359 |
| COTL1     | 1.24E-67 | 0.274706215 | 0.53  | 0.229 |
| SPATS2    | 4.60E-67 | 0.46183306  | 0.725 | 0.401 |
| IPMK      | 4.63E-67 | 0.585367977 | 0.525 | 0.239 |
| UBE2Q2    | 6.28E-67 | 0.418096525 | 0.731 | 0.412 |

|          |          |             |       |       |
|----------|----------|-------------|-------|-------|
| ODF2L    | 6.98E-67 | 0.430681972 | 0.758 | 0.438 |
| PDLIM3   | 7.41E-67 | 0.638235768 | 0.937 | 0.75  |
| STK17A   | 8.55E-67 | 0.296436521 | 0.653 | 0.326 |
| NEAT1    | 9.03E-67 | 0.717375513 | 0.991 | 0.865 |
| TLN2     | 1.26E-66 | 0.493830913 | 0.667 | 0.344 |
| ACVR1    | 1.32E-66 | 0.404753235 | 0.591 | 0.28  |
| SEC24D   | 1.71E-66 | 0.546889421 | 0.798 | 0.503 |
| FMNL3    | 2.03E-66 | 0.276501525 | 0.317 | 0.086 |
| PPP4R1   | 3.18E-66 | 0.359854921 | 0.55  | 0.241 |
| KCNQ1OT1 | 3.71E-66 | 0.627639652 | 0.772 | 0.442 |
| PELI1    | 3.88E-66 | 0.832797468 | 0.616 | 0.311 |
| ABRACL   | 4.09E-66 | 0.280746247 | 0.484 | 0.195 |
| STK10    | 5.05E-66 | 0.271972434 | 0.407 | 0.139 |
| BCAT1    | 6.77E-66 | 0.402148401 | 0.646 | 0.32  |
| RIN21    | 7.26E-66 | 0.53607732  | 0.845 | 0.545 |
| USP32    | 8.71E-66 | 0.471500834 | 0.67  | 0.349 |
| SGCD     | 9.29E-66 | 0.754841801 | 0.811 | 0.517 |
| PRR5     | 1.26E-65 | 0.25156619  | 0.468 | 0.178 |
| C17orf49 | 1.45E-65 | 0.386188521 | 0.682 | 0.393 |
| SLC39A7  | 1.55E-65 | 0.361606002 | 0.664 | 0.363 |
| SUPT3H   | 1.76E-65 | 0.457791302 | 0.546 | 0.242 |
| CD2AP    | 2.12E-65 | 0.38216036  | 0.595 | 0.286 |
| HTRA1    | 2.42E-65 | 0.865050495 | 0.9   | 0.736 |
| ISLR     | 9.63E-65 | 0.66845405  | 0.889 | 0.67  |
| RABAC1   | 1.12E-64 | 0.486427438 | 0.909 | 0.862 |
| MMP2     | 1.32E-64 | 0.568940857 | 0.948 | 0.706 |
| PSD3     | 1.36E-64 | 0.69208613  | 0.814 | 0.543 |
| TMED9    | 2.04E-64 | 0.434597731 | 0.842 | 0.652 |
| ARHGAP32 | 2.38E-64 | 0.545007979 | 0.654 | 0.342 |
| CACNA2D3 | 2.70E-64 | 0.592529487 | 0.369 | 0.122 |
| BAX      | 4.61E-64 | 0.378613719 | 0.682 | 0.382 |
| ANGPTL2  | 7.22E-64 | 0.509152607 | 0.766 | 0.478 |
| TSHZ3    | 7.58E-64 | 0.408315068 | 0.557 | 0.259 |
| CYTOR    | 7.83E-64 | 0.462532526 | 0.781 | 0.5   |
| HIVEP3   | 9.08E-64 | 0.469199399 | 0.514 | 0.219 |
| NDUFC2   | 9.19E-64 | 0.52227232  | 0.871 | 0.755 |
| GPX8     | 1.12E-63 | 0.405846252 | 0.78  | 0.506 |
| PLIN3    | 1.28E-63 | 0.38145416  | 0.738 | 0.445 |
| MAPK6    | 1.30E-63 | 0.443280904 | 0.696 | 0.37  |
| LRRC59   | 1.32E-63 | 0.345384003 | 0.642 | 0.336 |
| TIMP2    | 2.71E-63 | 0.47837183  | 0.975 | 0.857 |
| PRRX2    | 3.65E-63 | 0.542547786 | 0.72  | 0.435 |
| TBC1D23  | 4.09E-63 | 0.433670164 | 0.715 | 0.407 |

|             |          |             |       |       |
|-------------|----------|-------------|-------|-------|
| DPP4        | 4.22E-63 | 0.398412599 | 0.368 | 0.124 |
| MIRLET7BHG  | 4.36E-63 | 0.341811652 | 0.406 | 0.145 |
| MGAT5       | 2.10E-62 | 0.530262747 | 0.595 | 0.299 |
| SND1        | 2.16E-62 | 0.499401181 | 0.804 | 0.498 |
| GORASP2     | 2.95E-62 | 0.30845399  | 0.635 | 0.324 |
| RCC2        | 3.14E-62 | 0.271850233 | 0.427 | 0.162 |
| PMM2        | 3.51E-62 | 0.305876205 | 0.586 | 0.275 |
| SMIM3       | 3.93E-62 | 0.331752674 | 0.652 | 0.327 |
| ARHGAP31    | 6.05E-62 | 0.251198959 | 0.311 | 0.088 |
| EVL         | 7.11E-62 | 0.37998137  | 0.732 | 0.42  |
| ARFGAP1     | 7.23E-62 | 0.27475929  | 0.386 | 0.139 |
| ARF4        | 7.85E-62 | 0.434301529 | 0.935 | 0.778 |
| TDRP        | 8.10E-62 | 0.440627183 | 0.387 | 0.142 |
| CASK        | 1.53E-61 | 0.444377777 | 0.771 | 0.455 |
| GNB4        | 2.07E-61 | 0.3913364   | 0.655 | 0.347 |
| COPA        | 2.52E-61 | 0.439087046 | 0.836 | 0.556 |
| GOLGA3      | 2.58E-61 | 0.346892953 | 0.626 | 0.327 |
| CTTNBP2NL   | 2.80E-61 | 0.349487413 | 0.505 | 0.225 |
| TARSL2      | 5.04E-61 | 0.288167582 | 0.499 | 0.206 |
| USPL1       | 6.03E-61 | 0.638755455 | 0.489 | 0.219 |
| MAP3K4      | 1.10E-60 | 0.502066393 | 0.601 | 0.306 |
| MARVELD1    | 1.19E-60 | 0.321272736 | 0.598 | 0.303 |
| SQLE        | 1.24E-60 | 0.265283663 | 0.372 | 0.126 |
| LRRC1       | 1.35E-60 | 0.274302299 | 0.253 | 0.06  |
| PAPSS1      | 1.82E-60 | 0.350609227 | 0.574 | 0.281 |
| ACTR2       | 2.30E-60 | 0.344669369 | 0.847 | 0.595 |
| CEMIP       | 4.68E-60 | 1.329361567 | 0.301 | 0.092 |
| LIMK2       | 4.83E-60 | 0.290031489 | 0.331 | 0.105 |
| GNB1        | 5.96E-60 | 0.355080023 | 0.919 | 0.677 |
| AC004160.11 | 6.63E-60 | 0.68969151  | 0.628 | 0.335 |
| PPFIA2      | 6.98E-60 | 0.476262191 | 0.36  | 0.119 |
| KIAA1211    | 7.20E-60 | 0.365094929 | 0.404 | 0.15  |
| CHI3L1      | 7.78E-60 | 0.705650598 | 0.252 | 0.061 |
| AP000331.1  | 8.56E-60 | 0.328520883 | 0.426 | 0.163 |
| PDIA5       | 1.27E-59 | 0.339692091 | 0.499 | 0.224 |
| MYO6        | 1.82E-59 | 0.415893738 | 0.623 | 0.327 |
| MIR193BHG   | 2.07E-59 | 0.279499002 | 0.308 | 0.09  |
| YWHAG       | 2.08E-59 | 0.485667412 | 0.739 | 0.441 |
| LMCD1-AS1   | 2.19E-59 | 0.481381968 | 0.396 | 0.145 |
| EIF4E2      | 3.20E-59 | 0.308902253 | 0.675 | 0.392 |
| PHF20L1     | 3.57E-59 | 0.335117896 | 0.732 | 0.435 |
| ATP6V0B     | 4.01E-59 | 0.460687003 | 0.756 | 0.521 |
| KLF6        | 5.39E-59 | 0.597480683 | 0.92  | 0.751 |

|          |          |             |       |       |
|----------|----------|-------------|-------|-------|
| IFI30    | 5.49E-59 | 0.26880798  | 0.373 | 0.133 |
| ZNF609   | 7.71E-59 | 0.461600912 | 0.728 | 0.418 |
| ITSN1    | 1.78E-58 | 0.441320903 | 0.665 | 0.367 |
| UQCC2    | 2.02E-58 | 0.282451051 | 0.643 | 0.341 |
| NEK7     | 2.21E-58 | 0.487812205 | 0.719 | 0.42  |
| PLXNB2   | 2.60E-58 | 0.299216426 | 0.508 | 0.223 |
| MDK      | 3.16E-58 | 0.560437976 | 0.685 | 0.402 |
| SNX8     | 3.37E-58 | 0.253334299 | 0.399 | 0.149 |
| SOAT1    | 4.89E-58 | 0.420709469 | 0.527 | 0.248 |
| SEC24A   | 6.15E-58 | 0.376967532 | 0.584 | 0.287 |
| RNF150   | 6.95E-58 | 0.357434314 | 0.438 | 0.168 |
| TRPS1    | 7.00E-58 | 0.609020132 | 0.793 | 0.514 |
| RAPGEF2  | 8.02E-58 | 0.480686648 | 0.724 | 0.413 |
| AP2S1    | 8.48E-58 | 0.411664661 | 0.801 | 0.638 |
| PGM3     | 8.79E-58 | 0.34103782  | 0.614 | 0.326 |
| MYO9B    | 9.53E-58 | 0.338522115 | 0.655 | 0.344 |
| SMAD1    | 1.34E-57 | 0.3530763   | 0.483 | 0.213 |
| ERBIN    | 1.37E-57 | 0.492821871 | 0.79  | 0.512 |
| TNFRSF19 | 1.64E-57 | 0.26274366  | 0.269 | 0.071 |
| PRDX4    | 2.44E-57 | 0.489826266 | 0.816 | 0.642 |
| UBA6     | 4.63E-57 | 0.36257201  | 0.563 | 0.279 |
| TVP23C   | 5.02E-57 | 0.388003485 | 0.444 | 0.185 |
| AAK1     | 1.09E-56 | 0.340295456 | 0.705 | 0.398 |
| HEPH     | 1.15E-56 | 0.302515812 | 0.475 | 0.21  |
| EIF4G3   | 1.46E-56 | 0.503865919 | 0.844 | 0.572 |
| UHRF2    | 1.62E-56 | 0.469330351 | 0.52  | 0.24  |
| CACNA1C  | 2.44E-56 | 0.327260101 | 0.831 | 0.501 |
| CDK2AP1  | 2.90E-56 | 0.356262197 | 0.807 | 0.604 |
| SPIRE1   | 3.24E-56 | 0.400115967 | 0.563 | 0.275 |
| PAK2     | 7.90E-56 | 0.28785232  | 0.826 | 0.531 |
| EFNB2    | 7.94E-56 | 0.349221153 | 0.321 | 0.105 |
| PHC2     | 9.21E-56 | 0.401288919 | 0.78  | 0.486 |
| CTSZ     | 1.01E-55 | 0.385881152 | 0.818 | 0.59  |
| TBX3     | 1.44E-55 | 0.362244549 | 0.345 | 0.121 |
| KIFAP3   | 1.72E-55 | 0.452490571 | 0.769 | 0.505 |
| IGF1R    | 1.99E-55 | 0.571117606 | 0.842 | 0.549 |
| MAPK8    | 2.56E-55 | 0.44188989  | 0.666 | 0.359 |
| PSTPIP2  | 2.65E-55 | 0.255198644 | 0.297 | 0.091 |
| EIF2AK4  | 3.09E-55 | 0.309957757 | 0.64  | 0.348 |
| TMEM87B  | 4.20E-55 | 0.285777157 | 0.474 | 0.209 |
| SPTY2D1  | 9.67E-55 | 0.298320593 | 0.595 | 0.3   |
| ZDHHC20  | 1.27E-54 | 0.285136303 | 0.545 | 0.259 |
| XPR1     | 1.28E-54 | 0.46400319  | 0.593 | 0.307 |

|            |          |             |       |       |
|------------|----------|-------------|-------|-------|
| FNDC3B1    | 1.39E-54 | 0.612474124 | 0.984 | 0.807 |
| GOLGA2     | 1.44E-54 | 0.349207805 | 0.75  | 0.468 |
| CMIP       | 2.01E-54 | 0.288205408 | 0.599 | 0.296 |
| BMP2       | 3.85E-54 | 0.324254589 | 0.274 | 0.08  |
| PDLIM5     | 3.86E-54 | 0.609976221 | 0.794 | 0.529 |
| KIF5B      | 3.98E-54 | 0.352366086 | 0.876 | 0.632 |
| TBC1D9     | 4.71E-54 | 0.40978115  | 0.428 | 0.185 |
| LPGAT1     | 5.00E-54 | 0.352668496 | 0.646 | 0.343 |
| CORO1C     | 5.10E-54 | 0.381921183 | 0.657 | 0.37  |
| CPEB4      | 5.24E-54 | 0.40001636  | 0.586 | 0.297 |
| PSME4      | 5.67E-54 | 0.515275634 | 0.689 | 0.397 |
| CNIH3      | 6.22E-54 | 0.442456881 | 0.346 | 0.126 |
| NBL1       | 6.55E-54 | 0.605383874 | 0.896 | 0.759 |
| CRABP2     | 7.00E-54 | 0.453232594 | 0.566 | 0.297 |
| TGFB1I1    | 9.22E-54 | 0.355092818 | 0.783 | 0.538 |
| NIBAN2     | 9.27E-54 | 0.326707301 | 0.447 | 0.196 |
| PLEC       | 1.54E-53 | 0.330830324 | 0.725 | 0.426 |
| RAB1A      | 1.58E-53 | 0.385518602 | 0.897 | 0.682 |
| PDXK       | 1.59E-53 | 0.293600765 | 0.652 | 0.366 |
| AC017002.5 | 1.63E-53 | 0.297813459 | 0.328 | 0.11  |
| ARHGAP28   | 2.21E-53 | 0.335164454 | 0.3   | 0.096 |
| CMTM3      | 2.21E-53 | 0.357569516 | 0.653 | 0.367 |
| MYO1E      | 2.45E-53 | 0.613217151 | 0.727 | 0.425 |
| GALNT10    | 3.10E-53 | 0.399689244 | 0.647 | 0.352 |
| DAPK3      | 3.99E-53 | 0.298347348 | 0.609 | 0.322 |
| ADAR       | 7.81E-53 | 0.345343867 | 0.689 | 0.393 |
| RARS       | 8.88E-53 | 0.267307641 | 0.588 | 0.299 |
| PXDN       | 1.00E-52 | 0.455112922 | 0.542 | 0.28  |
| ENO1       | 1.04E-52 | 0.755710343 | 0.89  | 0.76  |
| ARNTL2     | 1.23E-52 | 0.281912288 | 0.297 | 0.094 |
| PDE4D1     | 1.24E-52 | 0.521568212 | 0.821 | 0.506 |
| TXNDC5     | 1.26E-52 | 0.327921578 | 0.719 | 0.46  |
| GPC1       | 1.46E-52 | 0.269496186 | 0.38  | 0.147 |
| NANS       | 1.49E-52 | 0.309684142 | 0.641 | 0.373 |
| RELB       | 1.61E-52 | 0.335686307 | 0.657 | 0.348 |
| COPB2      | 2.14E-52 | 0.377401223 | 0.782 | 0.548 |
| ITGA1      | 2.67E-52 | 0.333384856 | 0.676 | 0.359 |
| TP53I13    | 2.72E-52 | 0.301625716 | 0.654 | 0.369 |
| PRR16      | 3.01E-52 | 0.701615477 | 0.58  | 0.297 |
| P3H3       | 3.18E-52 | 0.299810783 | 0.588 | 0.308 |
| CLTC       | 5.80E-52 | 0.333018056 | 0.829 | 0.548 |
| COL8A2     | 6.13E-52 | 0.278263585 | 0.378 | 0.148 |
| PPP1R14B   | 6.34E-52 | 0.425900967 | 0.803 | 0.6   |



|          |          |             |       |       |
|----------|----------|-------------|-------|-------|
| KIAA0930 | 9.47E-52 | 0.291263544 | 0.545 | 0.274 |
| CNTN1    | 1.08E-51 | 0.487936335 | 0.371 | 0.149 |
| WIPI1    | 1.12E-51 | 0.279302776 | 0.571 | 0.29  |
| RASA2    | 1.26E-51 | 0.373661202 | 0.606 | 0.324 |
| HIF1A    | 1.66E-51 | 0.436958228 | 0.852 | 0.564 |
| ABHD17B  | 1.71E-51 | 0.393274095 | 0.408 | 0.173 |
| GOLGA4   | 7.05E-51 | 0.413300324 | 0.894 | 0.669 |
| IBTK     | 7.22E-51 | 0.312982571 | 0.589 | 0.306 |
| STARD3NL | 9.25E-51 | 0.322317415 | 0.515 | 0.253 |
| PAPSS2   | 9.27E-51 | 0.524144561 | 0.773 | 0.486 |
| KIF13A   | 9.48E-51 | 0.428826142 | 0.816 | 0.53  |
| FKBP11   | 1.33E-50 | 0.300804304 | 0.675 | 0.407 |
| RANBP9   | 1.43E-50 | 0.436683271 | 0.72  | 0.43  |
| PACS1    | 2.24E-50 | 0.338285014 | 0.659 | 0.36  |
| SYNCRIP  | 2.26E-50 | 0.283774093 | 0.809 | 0.556 |
| YIF1A    | 2.71E-50 | 0.397634268 | 0.703 | 0.475 |
| CDKL5    | 2.83E-50 | 0.428419194 | 0.427 | 0.184 |
| PLK2     | 3.80E-50 | 0.344732704 | 0.594 | 0.307 |
| ATP6AP1L | 4.01E-50 | 0.263020798 | 0.271 | 0.084 |
| HOXB2    | 4.08E-50 | 0.331428768 | 0.528 | 0.27  |
| DYRK3    | 4.11E-50 | 0.444450428 | 0.523 | 0.258 |
| GPR173   | 4.71E-50 | 0.273134667 | 0.303 | 0.102 |
| SPCS3    | 5.05E-50 | 0.306048886 | 0.736 | 0.455 |
| PTPA     | 6.77E-50 | 0.254715865 | 0.48  | 0.222 |
| SRGAP2   | 7.20E-50 | 0.286642492 | 0.549 | 0.275 |
| IL1R1    | 9.59E-50 | 0.43769953  | 0.839 | 0.575 |
| OSBPL6   | 9.86E-50 | 0.26178071  | 0.299 | 0.097 |
| TES      | 1.00E-49 | 0.323365691 | 0.499 | 0.237 |
| CERS6    | 1.09E-49 | 0.297401799 | 0.434 | 0.184 |
| ISOC2    | 1.09E-49 | 0.283178388 | 0.673 | 0.385 |
| GBF1     | 1.25E-49 | 0.339737929 | 0.691 | 0.392 |
| ATP6V1A  | 1.33E-49 | 0.294321497 | 0.487 | 0.23  |
| VGLL3    | 1.45E-49 | 0.404762191 | 0.65  | 0.368 |
| SGK1     | 1.53E-49 | 0.316940137 | 0.505 | 0.241 |
| AFF4     | 1.98E-49 | 0.529359114 | 0.92  | 0.701 |
| VEZT     | 2.35E-49 | 0.350584291 | 0.662 | 0.373 |
| GOLIM4   | 2.39E-49 | 0.35693156  | 0.838 | 0.567 |
| SH3GLB1  | 2.42E-49 | 0.318915105 | 0.832 | 0.593 |
| IFFO2    | 3.02E-49 | 0.305654738 | 0.295 | 0.099 |
| ATP13A3  | 3.35E-49 | 0.470233857 | 0.682 | 0.399 |
| MAN2A1   | 3.66E-49 | 0.453521313 | 0.667 | 0.387 |
| CLSTN2   | 5.22E-49 | 0.469145938 | 0.34  | 0.126 |
| CBX3     | 5.57E-49 | 0.276170044 | 0.808 | 0.584 |

|            |          |             |       |       |
|------------|----------|-------------|-------|-------|
| NBPF15     | 9.69E-49 | 0.277408452 | 0.394 | 0.163 |
| YEATS2     | 1.62E-48 | 0.266372187 | 0.466 | 0.216 |
| PLOD3      | 2.36E-48 | 0.257735677 | 0.519 | 0.253 |
| PLEKHG1    | 2.54E-48 | 0.30867925  | 0.56  | 0.275 |
| PPIC       | 2.92E-48 | 0.372489034 | 0.819 | 0.613 |
| NUS1       | 4.63E-48 | 0.259830323 | 0.475 | 0.222 |
| TCEAL9     | 6.34E-48 | 0.345963773 | 0.875 | 0.694 |
| ARCNI      | 6.34E-48 | 0.271062816 | 0.693 | 0.418 |
| TUBA1C     | 7.52E-48 | 0.423328223 | 0.775 | 0.526 |
| DPYSL3     | 7.93E-48 | 0.381703047 | 0.863 | 0.594 |
| TMEM30A    | 1.01E-47 | 0.328218537 | 0.73  | 0.467 |
| MB21D2     | 1.12E-47 | 0.32846205  | 0.413 | 0.174 |
| RAP1GDS1   | 1.15E-47 | 0.257217185 | 0.509 | 0.244 |
| PERP       | 1.78E-47 | 0.348410762 | 0.718 | 0.441 |
| PRKCA      | 1.83E-47 | 0.467381028 | 0.775 | 0.503 |
| HAS2       | 2.24E-47 | 0.824406435 | 0.496 | 0.264 |
| FKBP9      | 2.66E-47 | 0.270079019 | 0.765 | 0.48  |
| STIP1      | 4.30E-47 | 0.279337455 | 0.636 | 0.356 |
| FHOD31     | 5.19E-47 | 0.463731947 | 0.604 | 0.332 |
| DAP        | 5.95E-47 | 0.282165877 | 0.638 | 0.382 |
| TMED3      | 7.43E-47 | 0.343041015 | 0.768 | 0.523 |
| TMSB10     | 7.63E-47 | 0.478240725 | 0.991 | 0.973 |
| TDG        | 8.23E-47 | 0.255374293 | 0.586 | 0.311 |
| FBXO32     | 1.34E-46 | 0.42962549  | 0.594 | 0.321 |
| EVC        | 1.43E-46 | 0.253871585 | 0.388 | 0.163 |
| BX322234.1 | 1.45E-46 | 0.317111602 | 0.324 | 0.121 |
| P4HA2      | 1.52E-46 | 0.492674554 | 0.747 | 0.518 |
| SMC6       | 3.02E-46 | 0.284558873 | 0.524 | 0.26  |
| NPC1       | 3.85E-46 | 0.327940796 | 0.497 | 0.245 |
| SLC39A6    | 4.97E-46 | 0.263647566 | 0.607 | 0.336 |
| ENC1       | 6.01E-46 | 0.32178186  | 0.456 | 0.215 |
| TPBG       | 6.80E-46 | 0.315904554 | 0.649 | 0.383 |
| RASSF8     | 8.22E-46 | 0.374441376 | 0.774 | 0.491 |
| COL16A1    | 1.13E-45 | 0.380612402 | 0.636 | 0.377 |
| PLD1       | 1.16E-45 | 0.460695791 | 0.552 | 0.295 |
| AP3B1      | 1.20E-45 | 0.338408005 | 0.736 | 0.465 |
| ERN1       | 1.25E-45 | 0.463731088 | 0.617 | 0.351 |
| USO1       | 1.42E-45 | 0.303388201 | 0.738 | 0.469 |
| ZCCHC14    | 1.86E-45 | 0.409338938 | 0.554 | 0.309 |
| SPTLC2     | 2.26E-45 | 0.263938783 | 0.425 | 0.193 |
| GUCY1A2    | 2.35E-45 | 0.343313579 | 0.422 | 0.18  |
| PHACTR1    | 2.97E-45 | 0.313322973 | 0.421 | 0.188 |
| SLC39A10   | 3.50E-45 | 0.319069273 | 0.487 | 0.246 |

|          |          |             |       |       |
|----------|----------|-------------|-------|-------|
| KDELR1   | 3.54E-45 | 0.364557094 | 0.862 | 0.754 |
| MRC2     | 3.61E-45 | 0.361809345 | 0.893 | 0.625 |
| LUM      | 3.82E-45 | 0.515308987 | 0.969 | 0.793 |
| Clorf122 | 5.62E-45 | 0.269159136 | 0.758 | 0.544 |
| SUCO     | 6.87E-45 | 0.297107943 | 0.578 | 0.315 |
| CSNK1G1  | 9.63E-45 | 0.341336723 | 0.55  | 0.291 |
| TLN1     | 1.40E-44 | 0.286161681 | 0.886 | 0.668 |
| BMT2     | 1.50E-44 | 0.263555777 | 0.353 | 0.141 |
| MAP4K5   | 1.73E-44 | 0.364525511 | 0.821 | 0.554 |
| ADAM10   | 1.83E-44 | 0.291834574 | 0.627 | 0.35  |
| CHSY1    | 2.84E-44 | 0.287950031 | 0.66  | 0.373 |
| STAT1    | 2.94E-44 | 0.482688114 | 0.645 | 0.4   |
| BST2     | 4.07E-44 | 0.556486275 | 0.64  | 0.374 |
| DRAM1    | 4.14E-44 | 0.308114438 | 0.613 | 0.339 |
| ZFAND2A  | 5.11E-44 | 0.454203588 | 0.516 | 0.271 |
| TBCEL    | 6.63E-44 | 0.263496218 | 0.347 | 0.141 |
| UBTD2    | 6.66E-44 | 0.270934305 | 0.679 | 0.395 |
| VCAM1    | 7.16E-44 | 0.346726929 | 0.594 | 0.343 |
| MSC-AS1  | 7.84E-44 | 0.355604317 | 0.712 | 0.43  |
| FZD1     | 1.07E-43 | 0.268408351 | 0.555 | 0.294 |
| SEC61G   | 1.25E-43 | 0.354944064 | 0.84  | 0.713 |
| TMF1     | 1.25E-43 | 0.302589375 | 0.758 | 0.493 |
| PLEKHA5  | 1.50E-43 | 0.715086246 | 0.874 | 0.652 |
| BCAR3    | 1.74E-43 | 0.283701691 | 0.383 | 0.165 |
| G2E3     | 2.36E-43 | 0.284372338 | 0.45  | 0.218 |
| UBE2H    | 2.50E-43 | 0.38990105  | 0.877 | 0.638 |
| TRAF3    | 3.34E-43 | 0.293545653 | 0.584 | 0.318 |
| KLHL2    | 3.78E-43 | 0.251421365 | 0.336 | 0.135 |
| MACF1    | 4.54E-43 | 0.438261011 | 0.934 | 0.739 |
| PTPN12   | 5.81E-43 | 0.39772947  | 0.811 | 0.563 |
| NAA50    | 7.26E-43 | 0.336693642 | 0.685 | 0.429 |
| LRMDA    | 7.80E-43 | 0.533456122 | 0.683 | 0.427 |
| TGFBR1   | 8.32E-43 | 0.32298851  | 0.571 | 0.315 |
| FOXO1    | 9.73E-43 | 0.616928893 | 0.881 | 0.661 |
| PRRC2C   | 9.84E-43 | 0.301556379 | 0.943 | 0.755 |
| ATG5     | 1.07E-42 | 0.272419778 | 0.574 | 0.304 |
| ARPC2    | 1.15E-42 | 0.313211134 | 0.925 | 0.817 |
| BABAM2   | 1.37E-42 | 0.460246516 | 0.775 | 0.53  |
| DESI2    | 1.49E-42 | 0.30478932  | 0.725 | 0.464 |
| PDGFRB   | 1.52E-42 | 0.379197564 | 0.864 | 0.628 |
| PTPRD    | 2.22E-42 | 0.471604293 | 0.508 | 0.273 |
| MXD1     | 2.34E-42 | 0.416850468 | 0.441 | 0.222 |
| SCD5     | 3.52E-42 | 0.295130128 | 0.4   | 0.181 |

|             |          |             |       |       |
|-------------|----------|-------------|-------|-------|
| AZIN1       | 3.60E-42 | 0.310248083 | 0.671 | 0.407 |
| LPIN2       | 4.38E-42 | 0.282529577 | 0.588 | 0.327 |
| TPI1        | 5.08E-42 | 0.554801387 | 0.914 | 0.815 |
| GNPTAB      | 5.83E-42 | 0.29464128  | 0.529 | 0.29  |
| NOX4        | 7.22E-42 | 0.448644585 | 0.449 | 0.216 |
| MCU         | 9.11E-42 | 0.346570405 | 0.544 | 0.293 |
| PTPRM       | 9.65E-42 | 0.472899207 | 0.79  | 0.527 |
| CDC42BPA    | 9.85E-42 | 0.410743473 | 0.828 | 0.576 |
| CAMSAP2     | 1.06E-41 | 0.32142399  | 0.711 | 0.442 |
| CAPG        | 1.25E-41 | 0.273199516 | 0.589 | 0.329 |
| IFI27       | 1.33E-41 | 0.586374859 | 0.879 | 0.699 |
| SNAP23      | 1.45E-41 | 0.324412788 | 0.592 | 0.343 |
| ARHGAP22    | 1.55E-41 | 0.267446152 | 0.251 | 0.083 |
| ZBED1       | 1.74E-41 | 0.264105002 | 0.386 | 0.174 |
| YES1        | 1.82E-41 | 0.317038974 | 0.648 | 0.381 |
| MIR222HG    | 1.86E-41 | 0.289585124 | 0.356 | 0.151 |
| KIAA0355    | 2.67E-41 | 0.262460093 | 0.425 | 0.201 |
| TMTC21      | 3.48E-41 | 0.466091286 | 0.539 | 0.29  |
| KDM2A       | 3.55E-41 | 0.324475078 | 0.743 | 0.478 |
| DNM1        | 3.64E-41 | 0.273317066 | 0.68  | 0.399 |
| QKI         | 4.81E-41 | 0.389438581 | 0.952 | 0.744 |
| DLG1        | 4.94E-41 | 0.353811757 | 0.679 | 0.424 |
| DOCK1       | 5.48E-41 | 0.423539278 | 0.813 | 0.567 |
| OLFM2       | 6.60E-41 | 0.286665297 | 0.254 | 0.086 |
| NCOA3       | 7.57E-41 | 0.3805179   | 0.653 | 0.39  |
| CTNND1      | 9.51E-41 | 0.323750847 | 0.664 | 0.399 |
| PPP2R3A     | 1.16E-40 | 0.282768478 | 0.51  | 0.265 |
| SPON1       | 1.23E-40 | 0.350914079 | 0.692 | 0.388 |
| ERO1A       | 1.41E-40 | 0.29708465  | 0.499 | 0.263 |
| MCRIP1      | 1.62E-40 | 0.268575091 | 0.781 | 0.553 |
| TM9SF3      | 2.39E-40 | 0.25471912  | 0.883 | 0.655 |
| LRIG1       | 3.46E-40 | 0.363164574 | 0.485 | 0.252 |
| MACROD2     | 6.07E-40 | 0.310208251 | 0.281 | 0.103 |
| YTHDF3      | 8.70E-40 | 0.320573472 | 0.615 | 0.363 |
| SMAD2       | 8.76E-40 | 0.272101367 | 0.651 | 0.388 |
| TMEM117     | 9.58E-40 | 0.307779171 | 0.441 | 0.212 |
| LRCH1       | 1.04E-39 | 0.423827582 | 0.567 | 0.327 |
| SUSD6       | 1.11E-39 | 0.274530977 | 0.593 | 0.329 |
| RARRES2     | 1.37E-39 | 0.657916018 | 0.932 | 0.848 |
| PALM2-AKAP2 | 1.53E-39 | 0.433920661 | 0.728 | 0.468 |
| RDX         | 2.34E-39 | 0.262604039 | 0.806 | 0.582 |
| PHACTR4     | 2.73E-39 | 0.319874667 | 0.568 | 0.313 |
| EFEMP2      | 3.13E-39 | 0.28878554  | 0.861 | 0.685 |

|           |          |             |       |       |
|-----------|----------|-------------|-------|-------|
| ABHD3     | 3.14E-39 | 0.399678518 | 0.364 | 0.164 |
| COLEC12   | 3.65E-39 | 0.256217785 | 0.674 | 0.39  |
| PTK2      | 3.98E-39 | 0.455303379 | 0.879 | 0.652 |
| ZNF326    | 4.27E-39 | 0.27834181  | 0.569 | 0.32  |
| MX1       | 5.70E-39 | 0.370562619 | 0.473 | 0.245 |
| ATP11B    | 7.20E-39 | 0.360193561 | 0.654 | 0.392 |
| MAST2     | 7.31E-39 | 0.364483018 | 0.59  | 0.346 |
| RCN2      | 8.70E-39 | 0.299792706 | 0.747 | 0.514 |
| SEC61B    | 9.00E-39 | 0.30885061  | 0.892 | 0.808 |
| IL1RAP    | 1.01E-38 | 0.309268962 | 0.28  | 0.107 |
| NBAS      | 1.11E-38 | 0.348642219 | 0.675 | 0.424 |
| TPM1      | 1.69E-38 | 0.356012922 | 0.91  | 0.808 |
| NRBF2     | 2.65E-38 | 0.263018172 | 0.618 | 0.368 |
| SLAIN2    | 3.07E-38 | 0.339861964 | 0.659 | 0.401 |
| RAB6A     | 3.92E-38 | 0.314782953 | 0.723 | 0.463 |
| CUTA      | 5.33E-38 | 0.280007638 | 0.825 | 0.667 |
| STX6      | 8.18E-38 | 0.260244027 | 0.333 | 0.142 |
| VCL       | 9.28E-38 | 0.370117673 | 0.82  | 0.603 |
| PRICKLE21 | 1.47E-37 | 0.411520718 | 0.77  | 0.507 |
| PGAM1     | 1.73E-37 | 0.391722795 | 0.822 | 0.669 |
| MYL12A    | 2.00E-37 | 0.447573755 | 0.892 | 0.826 |
| BMPR1A    | 2.14E-37 | 0.3504593   | 0.647 | 0.393 |
| DHRXS     | 2.25E-37 | 0.277224558 | 0.614 | 0.361 |
| TLE4      | 2.70E-37 | 0.374657079 | 0.733 | 0.48  |
| BAMBI     | 2.81E-37 | 0.43458715  | 0.308 | 0.131 |
| PARP14    | 3.96E-37 | 0.3911218   | 0.628 | 0.392 |
| GLI31     | 5.28E-37 | 0.437633288 | 0.813 | 0.558 |
| DAB1      | 5.65E-37 | 0.387179193 | 0.363 | 0.166 |
| PCNX1     | 7.91E-37 | 0.333509413 | 0.704 | 0.439 |
| PICALM    | 8.12E-37 | 0.343878071 | 0.843 | 0.611 |
| JMJD1C    | 8.13E-37 | 0.400969284 | 0.966 | 0.79  |
| ITCH      | 8.63E-37 | 0.282510974 | 0.657 | 0.401 |
| CNN3      | 9.02E-37 | 0.29530144  | 0.889 | 0.709 |
| XPO1      | 1.02E-36 | 0.297559149 | 0.645 | 0.398 |
| MIF       | 1.05E-36 | 0.576449955 | 0.936 | 0.91  |
| MITF1     | 1.33E-36 | 0.422351934 | 0.71  | 0.456 |
| KATNBL1   | 1.48E-36 | 0.252303904 | 0.65  | 0.404 |
| LCOR      | 1.64E-36 | 0.29687674  | 0.582 | 0.34  |
| FAM171B   | 1.72E-36 | 0.340755018 | 0.375 | 0.177 |
| FXR1      | 1.95E-36 | 0.307208701 | 0.798 | 0.566 |
| TMEM41B   | 2.31E-36 | 0.287155709 | 0.469 | 0.251 |
| STAM      | 2.36E-36 | 0.255697216 | 0.529 | 0.293 |
| GLS       | 2.39E-36 | 0.451097291 | 0.863 | 0.623 |

|          |          |             |       |       |
|----------|----------|-------------|-------|-------|
| PPP2R5E  | 2.52E-36 | 0.298767573 | 0.714 | 0.471 |
| PCOLCE   | 2.83E-36 | 0.415305931 | 0.932 | 0.824 |
| SLC44A1  | 3.01E-36 | 0.329065462 | 0.708 | 0.462 |
| DCLK2    | 3.41E-36 | 0.259458346 | 0.326 | 0.139 |
| PLA2R1   | 4.03E-36 | 0.29401147  | 0.411 | 0.203 |
| SYAP1    | 4.21E-36 | 0.293651373 | 0.667 | 0.43  |
| AMOTL1   | 4.31E-36 | 0.267133393 | 0.531 | 0.289 |
| ATF7IP   | 4.89E-36 | 0.260954224 | 0.61  | 0.369 |
| SCFD1    | 4.93E-36 | 0.257642273 | 0.776 | 0.506 |
| PTPN1    | 5.75E-36 | 0.351033934 | 0.69  | 0.433 |
| CACYBP   | 8.45E-36 | 0.400648962 | 0.747 | 0.532 |
| RYBP     | 1.05E-35 | 0.264832591 | 0.737 | 0.475 |
| PAFAH1B1 | 1.15E-35 | 0.270330599 | 0.878 | 0.657 |
| HMGCS1   | 1.23E-35 | 0.426077537 | 0.472 | 0.258 |
| ILK      | 1.25E-35 | 0.259012766 | 0.797 | 0.603 |
| SETD5    | 1.39E-35 | 0.34027798  | 0.777 | 0.541 |
| GSK3B    | 1.67E-35 | 0.366123599 | 0.691 | 0.445 |
| ARHGDI1  | 1.81E-35 | 0.266546298 | 0.799 | 0.588 |
| ZNF618   | 2.07E-35 | 0.279660313 | 0.45  | 0.233 |
| RGS16    | 2.21E-35 | 0.368308875 | 0.473 | 0.249 |
| RNF24    | 2.54E-35 | 0.319799383 | 0.563 | 0.323 |
| RARB     | 2.75E-35 | 0.295034431 | 0.407 | 0.201 |
| CSNK1G3  | 3.24E-35 | 0.278576451 | 0.569 | 0.33  |
| MINDY2   | 3.32E-35 | 0.302886781 | 0.646 | 0.409 |
| MARK3    | 3.40E-35 | 0.294860906 | 0.769 | 0.51  |
| RAP1B    | 3.49E-35 | 0.305530231 | 0.931 | 0.774 |
| RNF149   | 4.07E-35 | 0.250260474 | 0.681 | 0.42  |
| ANKRD10  | 8.84E-35 | 0.295715228 | 0.79  | 0.527 |
| GNA12    | 9.23E-35 | 0.275207721 | 0.603 | 0.361 |
| MAPKAPK2 | 1.00E-34 | 0.27114447  | 0.668 | 0.402 |
| NDEL1    | 1.01E-34 | 0.254833521 | 0.557 | 0.324 |
| LRRFIP1  | 1.34E-34 | 0.332623274 | 0.8   | 0.535 |
| RNF145   | 1.45E-34 | 0.260485623 | 0.679 | 0.429 |
| COPZ2    | 1.59E-34 | 0.313139268 | 0.726 | 0.532 |
| PDLIM7   | 1.75E-34 | 0.316999498 | 0.674 | 0.456 |
| UBE2E1   | 2.13E-34 | 0.29197452  | 0.74  | 0.509 |
| MYOF     | 2.17E-34 | 0.339018785 | 0.846 | 0.623 |
| USP34    | 2.60E-34 | 0.319410582 | 0.864 | 0.645 |
| MXRA8    | 3.12E-34 | 0.360703174 | 0.872 | 0.696 |
| TMCC1    | 3.63E-34 | 0.261924799 | 0.619 | 0.371 |
| BACH1    | 5.25E-34 | 0.328792923 | 0.679 | 0.427 |
| LDLR     | 5.87E-34 | 0.25869935  | 0.364 | 0.171 |
| HECA     | 5.91E-34 | 0.267640353 | 0.558 | 0.322 |

|          |          |             |       |       |
|----------|----------|-------------|-------|-------|
| TMEM131  | 6.41E-34 | 0.329169414 | 0.676 | 0.432 |
| UBR5     | 6.43E-34 | 0.356623138 | 0.795 | 0.544 |
| ASPH     | 7.73E-34 | 0.251271972 | 0.885 | 0.665 |
| GALNT1   | 1.02E-33 | 0.291387589 | 0.632 | 0.4   |
| BICD1    | 1.07E-33 | 0.336746217 | 0.597 | 0.358 |
| CFL1     | 1.09E-33 | 0.313093636 | 0.928 | 0.905 |
| ISM1     | 1.39E-33 | 0.433372571 | 0.386 | 0.195 |
| MTDH     | 1.81E-33 | 0.278254904 | 0.942 | 0.784 |
| SLC16A1  | 3.33E-33 | 0.366288962 | 0.6   | 0.356 |
| DIP2B    | 4.86E-33 | 0.255971227 | 0.521 | 0.293 |
| TMEM165  | 5.14E-33 | 0.340443957 | 0.855 | 0.629 |
| PDZRN31  | 7.00E-33 | 0.518576863 | 0.845 | 0.623 |
| MLEC     | 9.19E-33 | 0.268051121 | 0.751 | 0.539 |
| BAG3     | 1.32E-32 | 0.43963244  | 0.758 | 0.532 |
| SRPX2    | 2.28E-32 | 0.273171625 | 0.654 | 0.415 |
| PLXDC21  | 2.40E-32 | 0.366837956 | 0.957 | 0.683 |
| CRY1     | 2.75E-32 | 0.417168078 | 0.706 | 0.49  |
| LPP      | 3.31E-32 | 0.275863366 | 0.976 | 0.844 |
| PEAK1    | 3.68E-32 | 0.371469843 | 0.862 | 0.614 |
| ZSWIM61  | 4.50E-32 | 0.29182954  | 0.884 | 0.644 |
| SMC4     | 4.83E-32 | 0.259232537 | 0.454 | 0.243 |
| WNT5B    | 5.54E-32 | 0.356646901 | 0.401 | 0.208 |
| RFX7     | 5.61E-32 | 0.283601965 | 0.467 | 0.253 |
| STAG1    | 8.14E-32 | 0.389389529 | 0.922 | 0.707 |
| ATP1B1   | 1.01E-31 | 0.276085558 | 0.39  | 0.193 |
| IGFBP3   | 1.02E-31 | 0.394883523 | 0.267 | 0.108 |
| MLLT3    | 1.20E-31 | 0.330703601 | 0.573 | 0.343 |
| CCN1     | 1.44E-31 | 0.487675323 | 0.843 | 0.656 |
| KLHL24   | 1.76E-31 | 0.28246278  | 0.593 | 0.359 |
| MICU1    | 1.89E-31 | 0.257235213 | 0.684 | 0.445 |
| ABCA1    | 1.93E-31 | 0.328665409 | 0.723 | 0.469 |
| PGK1     | 1.99E-31 | 0.5271101   | 0.817 | 0.658 |
| ZMYM4    | 2.88E-31 | 0.262635274 | 0.636 | 0.41  |
| LAMA4    | 3.01E-31 | 0.290875325 | 0.867 | 0.661 |
| DYRK1A   | 3.32E-31 | 0.325688209 | 0.72  | 0.476 |
| OSBPL8   | 3.86E-31 | 0.281822318 | 0.925 | 0.72  |
| TIAM2    | 3.92E-31 | 0.37877424  | 0.455 | 0.259 |
| PRICKLE1 | 4.40E-31 | 0.407925711 | 0.439 | 0.244 |
| PDE7B    | 4.44E-31 | 0.28089235  | 0.315 | 0.143 |
| SSR2     | 4.67E-31 | 0.259945728 | 0.881 | 0.789 |
| RIPK2    | 5.69E-31 | 0.299929485 | 0.449 | 0.251 |
| RC3H1    | 9.18E-31 | 0.353518042 | 0.661 | 0.436 |
| FRYL     | 1.58E-30 | 0.282866181 | 0.694 | 0.445 |

|            |          |             |       |       |
|------------|----------|-------------|-------|-------|
| RGCC       | 1.76E-30 | 0.342821984 | 0.636 | 0.4   |
| PPME1      | 2.41E-30 | 0.290225876 | 0.457 | 0.254 |
| LINC00578  | 3.00E-30 | 0.695515741 | 0.351 | 0.181 |
| FAM214A    | 3.41E-30 | 0.362328741 | 0.508 | 0.302 |
| TBL1XR1    | 3.52E-30 | 0.34928407  | 0.797 | 0.586 |
| MED27      | 4.55E-30 | 0.269792665 | 0.56  | 0.342 |
| RHOC       | 6.22E-30 | 0.284470696 | 0.841 | 0.708 |
| AFDN       | 6.44E-30 | 0.275952305 | 0.565 | 0.335 |
| EVI5       | 1.18E-29 | 0.251423455 | 0.754 | 0.509 |
| EZH2       | 1.53E-29 | 0.336437194 | 0.379 | 0.195 |
| PAG1       | 1.62E-29 | 0.295213806 | 0.439 | 0.238 |
| PCNX4      | 1.87E-29 | 0.271098592 | 0.58  | 0.357 |
| VCP        | 2.03E-29 | 0.275150856 | 0.842 | 0.666 |
| PRDM2      | 2.29E-29 | 0.313685983 | 0.793 | 0.565 |
| SLC38A2    | 2.35E-29 | 0.414933623 | 0.95  | 0.787 |
| MED13      | 2.79E-29 | 0.34668921  | 0.784 | 0.561 |
| PPM1D      | 2.88E-29 | 0.275770288 | 0.351 | 0.177 |
| TRA2A      | 2.98E-29 | 0.309201501 | 0.792 | 0.586 |
| ATP2A2     | 3.41E-29 | 0.285197827 | 0.805 | 0.569 |
| GOLGB1     | 3.55E-29 | 0.250976904 | 0.843 | 0.625 |
| FDX1       | 4.77E-29 | 0.257523245 | 0.527 | 0.317 |
| NUMB       | 4.86E-29 | 0.317256441 | 0.697 | 0.468 |
| CEP170     | 7.23E-29 | 0.27315329  | 0.71  | 0.477 |
| GNAQ       | 8.85E-29 | 0.294484135 | 0.833 | 0.608 |
| RRAS2      | 9.50E-29 | 0.278171991 | 0.484 | 0.282 |
| ASCC3      | 1.02E-28 | 0.251108442 | 0.695 | 0.456 |
| GAPDH      | 1.18E-28 | 0.456748771 | 0.954 | 0.951 |
| ARHGAP5    | 1.18E-28 | 0.280143154 | 0.65  | 0.426 |
| NHSL2      | 1.36E-28 | 0.308492527 | 0.495 | 0.286 |
| SERPINE1   | 2.37E-28 | 0.340670224 | 0.58  | 0.356 |
| AL050309.1 | 3.01E-28 | 0.285391546 | 0.422 | 0.224 |
| FERMT2     | 3.65E-28 | 0.293646449 | 0.894 | 0.699 |
| ELOVL5     | 3.97E-28 | 0.449859753 | 0.745 | 0.509 |
| RERE       | 4.82E-28 | 0.357500479 | 0.858 | 0.663 |
| STK3       | 1.02E-27 | 0.38240376  | 0.864 | 0.664 |
| PFKFB3     | 1.08E-27 | 0.280584494 | 0.56  | 0.346 |
| MAP4K3     | 1.28E-27 | 0.252774424 | 0.638 | 0.413 |
| RSRC1      | 1.32E-27 | 0.279526364 | 0.698 | 0.48  |
| BAZ1A      | 1.37E-27 | 0.251245075 | 0.713 | 0.473 |
| FBXO11     | 2.13E-27 | 0.277029661 | 0.824 | 0.591 |
| TRANK1     | 2.38E-27 | 0.259622343 | 0.426 | 0.237 |
| CDK13      | 7.77E-27 | 0.272173703 | 0.711 | 0.476 |
| JMY        | 8.37E-27 | 0.359996465 | 0.509 | 0.304 |



|            |          |             |       |       |
|------------|----------|-------------|-------|-------|
| IER5       | 8.83E-27 | 0.484650097 | 0.597 | 0.416 |
| USP54      | 1.71E-26 | 0.625817907 | 0.397 | 0.226 |
| EIF2AK3    | 1.81E-26 | 0.333213328 | 0.515 | 0.309 |
| TPST11     | 2.39E-26 | 0.317704416 | 0.815 | 0.576 |
| ZFPM2-AS11 | 4.20E-26 | 0.398426638 | 0.609 | 0.413 |
| VPS13B1    | 6.63E-26 | 0.336536542 | 0.876 | 0.68  |
| SNTB1      | 6.75E-26 | 0.320791617 | 0.479 | 0.284 |
| NFAT5      | 8.64E-26 | 0.31632918  | 0.832 | 0.62  |
| SFMBT2     | 1.08E-25 | 0.265882766 | 0.378 | 0.201 |
| TWSG1      | 1.36E-25 | 0.263217716 | 0.73  | 0.519 |
| APCDD1     | 2.44E-25 | 0.516590668 | 0.605 | 0.422 |
| ABI1       | 2.68E-25 | 0.252219762 | 0.637 | 0.415 |
| STARD13    | 2.78E-25 | 0.299888789 | 0.661 | 0.434 |
| FTO        | 4.46E-25 | 0.322907178 | 0.77  | 0.556 |
| UBE2E2     | 4.91E-25 | 0.338549642 | 0.872 | 0.662 |
| FOXN31     | 5.16E-25 | 0.313113798 | 0.924 | 0.732 |
| ATRX       | 6.24E-25 | 0.25108282  | 0.891 | 0.706 |
| PTBP2      | 7.34E-25 | 0.256821496 | 0.675 | 0.452 |
| SCMH1      | 7.36E-25 | 0.256800411 | 0.681 | 0.454 |
| ARID1B     | 7.93E-25 | 0.320892511 | 0.925 | 0.729 |
| NAV11      | 1.85E-24 | 0.287449855 | 0.711 | 0.484 |
| HIVEP2     | 1.88E-24 | 0.268445498 | 0.784 | 0.558 |
| ADIPOR2    | 2.08E-24 | 0.310562793 | 0.521 | 0.325 |
| DOCK41     | 5.96E-24 | 0.273808553 | 0.775 | 0.521 |
| SBF2       | 5.96E-24 | 0.34167531  | 0.873 | 0.674 |
| HLA-C      | 1.48E-23 | 0.302588945 | 0.953 | 0.919 |
| UGCG       | 1.52E-23 | 0.25159792  | 0.723 | 0.493 |
| FBXL71     | 1.53E-23 | 0.386477264 | 0.902 | 0.699 |
| NAV31      | 2.18E-23 | 0.311786248 | 0.756 | 0.509 |
| WARS       | 3.55E-23 | 0.263169157 | 0.429 | 0.258 |
| AUTS21     | 5.85E-23 | 0.456688425 | 0.926 | 0.756 |
| GIPC2      | 6.98E-23 | 0.384268379 | 0.343 | 0.189 |
| CYP51A1    | 9.03E-23 | 0.284577848 | 0.495 | 0.317 |
| RND3       | 2.14E-22 | 0.343269491 | 0.845 | 0.644 |
| GAS71      | 5.39E-22 | 0.272065117 | 0.714 | 0.495 |
| SMURF2     | 5.50E-22 | 0.252950131 | 0.715 | 0.492 |
| JAM3       | 5.53E-22 | 0.299642083 | 0.614 | 0.416 |
| TSPYL2     | 6.68E-22 | 0.293546544 | 0.611 | 0.426 |
| PAPPA      | 1.23E-21 | 0.397767424 | 0.349 | 0.192 |
| SIK3       | 2.11E-21 | 0.274706825 | 0.872 | 0.669 |
| GSTO1      | 2.41E-21 | 0.340759732 | 0.813 | 0.695 |
| RBP1       | 2.61E-21 | 0.315869702 | 0.632 | 0.455 |
| ZNF407     | 4.03E-21 | 0.262497729 | 0.539 | 0.355 |

|           |           |             |       |       |
|-----------|-----------|-------------|-------|-------|
| FNIP1     | 1.60E-20  | 0.253435656 | 0.763 | 0.566 |
| CCDC85B   | 2.14E-20  | 0.26051552  | 0.796 | 0.62  |
| RLF       | 8.88E-20  | 0.296406698 | 0.688 | 0.494 |
| FLNB      | 1.78E-19  | 0.270317862 | 0.425 | 0.275 |
| KDM6A     | 2.18E-19  | 0.259517957 | 0.642 | 0.448 |
| ARHGAP24  | 3.41E-19  | 0.360325119 | 0.649 | 0.446 |
| PAM1      | 1.29E-18  | 0.283745574 | 0.927 | 0.746 |
| XIST      | 1.33E-18  | 0.551249574 | 0.309 | 0.182 |
| SVIL      | 5.48E-18  | 0.327462896 | 0.907 | 0.739 |
| MRTFA1    | 1.04E-17  | 0.263320598 | 0.856 | 0.647 |
| TNFRSF21  | 1.15E-17  | 0.310097149 | 0.381 | 0.245 |
| SORBS1    | 1.21E-17  | 0.262172728 | 0.621 | 0.425 |
| SAT1      | 2.48E-17  | 0.354771867 | 0.936 | 0.803 |
| SLC39A141 | 4.38E-17  | 0.28353238  | 0.621 | 0.441 |
| PRSS23    | 1.42E-16  | 0.289730219 | 0.787 | 0.626 |
| PHF21A    | 1.43E-16  | 0.251184435 | 0.592 | 0.414 |
| BNIP3     | 2.52E-16  | 0.361027057 | 0.545 | 0.398 |
| SFRP4     | 4.47E-16  | 0.357316419 | 0.493 | 0.347 |
| IFI6      | 5.60E-16  | 0.28547979  | 0.699 | 0.56  |
| MEIS21    | 6.09E-16  | 0.260586167 | 0.815 | 0.644 |
| PLAT      | 6.53E-15  | 0.253748851 | 0.594 | 0.426 |
| TUBA1A    | 1.08E-14  | 0.315720106 | 0.906 | 0.84  |
| ADAM17    | 1.48E-14  | 0.256739827 | 0.65  | 0.472 |
| IL1RAPL1  | 2.86E-14  | 0.322596168 | 0.255 | 0.146 |
| FBXW7     | 3.77E-14  | 0.337691408 | 0.659 | 0.478 |
| ACTG1     | 3.90E-14  | 0.318923776 | 0.966 | 0.958 |
| PTGDS1    | 6.29E-14  | 0.873257832 | 0.376 | 0.249 |
| LSAMP1    | 1.31E-11  | 0.500858811 | 0.655 | 0.529 |
| TNFAIP3   | 1.58E-11  | 0.348790438 | 0.67  | 0.531 |
| IFRD1     | 1.65E-11  | 0.301623064 | 0.79  | 0.64  |
| SLC2A3    | 4.71E-10  | 0.383623896 | 0.672 | 0.527 |
| ACTB      | 1.55E-09  | 0.300141633 | 0.973 | 0.961 |
| LTBP1     | 3.54E-09  | 0.250088032 | 0.739 | 0.599 |
| PBX31     | 2.39E-06  | 0.344687192 | 0.756 | 0.63  |
| MYH11     | 3.85E-274 | 3.692273657 | 0.652 | 0.092 |
| CDH6      | 1.56E-271 | 1.317065063 | 0.518 | 0.034 |
| NOTCH3    | 1.15E-261 | 2.152344637 | 0.736 | 0.156 |
| GPRC5C    | 1.61E-254 | 1.125829143 | 0.421 | 0.015 |
| APOLD1    | 5.73E-254 | 2.065860011 | 0.549 | 0.055 |
| PTP4A3    | 1.75E-252 | 1.546789303 | 0.53  | 0.049 |
| RYR2      | 7.12E-251 | 1.64074351  | 0.492 | 0.034 |
| ITGA7     | 2.72E-246 | 1.295988489 | 0.541 | 0.056 |
| SLC38A11  | 1.24E-243 | 1.736638106 | 0.375 | 0.008 |

|          |           |             |       |       |
|----------|-----------|-------------|-------|-------|
| RGS5     | 5.03E-243 | 3.398188752 | 0.482 | 0.035 |
| SLC7A2   | 3.53E-241 | 1.741327248 | 0.538 | 0.057 |
| PARM1    | 8.49E-241 | 1.198337456 | 0.49  | 0.038 |
| ADAMTS9  | 4.93E-237 | 2.594550221 | 0.516 | 0.052 |
| DGKB     | 1.64E-232 | 1.340770313 | 0.385 | 0.012 |
| CASQ2    | 8.94E-228 | 0.815026913 | 0.323 | 0.002 |
| CTNNA3   | 3.11E-224 | 1.392525013 | 0.367 | 0.011 |
| HEYL     | 3.91E-224 | 1.441313895 | 0.544 | 0.068 |
| ATP1A2   | 3.23E-223 | 0.823039031 | 0.33  | 0.003 |
| MYOCD    | 1.60E-219 | 0.921292938 | 0.367 | 0.012 |
| PIP5K1B  | 1.96E-218 | 1.013993818 | 0.361 | 0.011 |
| NRGN     | 6.63E-216 | 1.025255016 | 0.344 | 0.009 |
| GPR20    | 4.16E-213 | 0.644858636 | 0.3   | 0.001 |
| TBX2     | 1.11E-212 | 1.768398122 | 0.63  | 0.129 |
| INPP4B   | 7.12E-212 | 1.99911379  | 0.643 | 0.132 |
| RERGL    | 8.02E-212 | 2.345810888 | 0.42  | 0.03  |
| NPNT     | 4.13E-206 | 0.777760684 | 0.334 | 0.009 |
| WFDC1    | 4.61E-206 | 1.23019821  | 0.446 | 0.039 |
| LAMA5    | 2.97E-204 | 0.755712613 | 0.377 | 0.019 |
| COX4I2   | 3.48E-204 | 1.481760805 | 0.438 | 0.037 |
| AVPR1A   | 2.72E-201 | 0.95061733  | 0.307 | 0.005 |
| CSPG4    | 9.60E-200 | 1.042169502 | 0.431 | 0.038 |
| TAGLN    | 4.64E-197 | 2.848277155 | 0.91  | 0.503 |
| ACTA2    | 8.73E-197 | 3.250653518 | 0.867 | 0.484 |
| NTRK3    | 1.99E-196 | 1.269793826 | 0.366 | 0.02  |
| FOXC2    | 1.13E-195 | 0.612994169 | 0.321 | 0.009 |
| NDUFA4L2 | 1.36E-193 | 2.522300485 | 0.539 | 0.091 |
| LDB3     | 3.04E-192 | 0.818277394 | 0.305 | 0.007 |
| TBX2-AS1 | 1.84E-189 | 1.008205615 | 0.426 | 0.041 |
| TESC     | 1.87E-189 | 0.789723651 | 0.331 | 0.013 |
| SORT1    | 2.96E-187 | 1.631310663 | 0.58  | 0.117 |
| AKAP6    | 1.25E-186 | 1.241507941 | 0.37  | 0.025 |
| NTRK2    | 3.13E-185 | 1.527600337 | 0.502 | 0.074 |
| PDGFA    | 3.88E-185 | 1.516534342 | 0.566 | 0.114 |
| MAP2     | 5.24E-185 | 0.887877001 | 0.39  | 0.03  |
| SCN3A    | 1.97E-183 | 0.809066558 | 0.29  | 0.006 |
| DMD      | 1.10E-181 | 2.219681921 | 0.639 | 0.163 |
| LGI4     | 1.98E-181 | 0.868659167 | 0.408 | 0.038 |
| ECRG4    | 2.63E-180 | 1.111677464 | 0.357 | 0.023 |
| MYL9     | 3.75E-180 | 2.359920632 | 0.934 | 0.806 |
| SORBS2   | 2.22E-178 | 2.750474206 | 0.546 | 0.107 |
| CBFA2T3  | 4.49E-178 | 0.620468087 | 0.292 | 0.008 |
| SOX6     | 7.25E-177 | 1.126712378 | 0.382 | 0.032 |

|             |           |             |       |       |
|-------------|-----------|-------------|-------|-------|
| FAM162B     | 1.64E-175 | 1.032050537 | 0.367 | 0.027 |
| SYNM        | 6.11E-172 | 1.416025679 | 0.475 | 0.072 |
| HIGD1B      | 2.21E-171 | 1.361261716 | 0.305 | 0.013 |
| KCNMB1      | 2.90E-170 | 0.75523642  | 0.346 | 0.024 |
| SRL         | 6.84E-170 | 0.663226921 | 0.279 | 0.008 |
| SERPINI1    | 2.87E-169 | 1.03245909  | 0.42  | 0.05  |
| LMOD1       | 1.28E-165 | 1.950256253 | 0.684 | 0.24  |
| CLMN        | 1.07E-164 | 1.956539668 | 0.638 | 0.185 |
| CCDC3       | 1.82E-164 | 1.626820873 | 0.575 | 0.136 |
| CARMN       | 4.63E-161 | 1.817630271 | 0.536 | 0.111 |
| CSRP2       | 7.22E-160 | 2.153312473 | 0.741 | 0.327 |
| HES4        | 1.34E-157 | 1.945631466 | 0.713 | 0.274 |
| MRVI1       | 1.72E-157 | 1.258512821 | 0.598 | 0.157 |
| MYLK        | 2.34E-157 | 1.656551762 | 0.779 | 0.345 |
| PTMA        | 7.85E-157 | 1.252060672 | 0.985 | 0.973 |
| IGFBP7      | 1.88E-156 | 2.1216295   | 0.946 | 0.92  |
| RAPGEF5     | 3.84E-153 | 0.994883005 | 0.374 | 0.04  |
| ADCY5       | 4.09E-153 | 0.738387894 | 0.331 | 0.027 |
| ADAP2       | 1.10E-151 | 0.61667209  | 0.289 | 0.016 |
| TPM2        | 5.64E-151 | 1.874479875 | 0.936 | 0.76  |
| TBC1D1      | 2.39E-150 | 1.64798083  | 0.689 | 0.263 |
| CACNA1H     | 1.48E-148 | 0.577804938 | 0.32  | 0.025 |
| EGFLAM      | 1.78E-148 | 0.999034932 | 0.303 | 0.021 |
| ADGRF5      | 8.53E-146 | 1.188372125 | 0.266 | 0.012 |
| MEF2C       | 1.53E-145 | 1.579026195 | 0.662 | 0.242 |
| GJC1        | 3.97E-145 | 1.162951762 | 0.456 | 0.082 |
| ADAMTS9-AS2 | 4.31E-143 | 1.796471119 | 0.656 | 0.214 |
| EFHD1       | 4.52E-143 | 1.203116847 | 0.561 | 0.145 |
| FRY         | 9.19E-143 | 1.723082539 | 0.646 | 0.224 |
| PPM1L       | 3.11E-141 | 1.238458768 | 0.454 | 0.083 |
| KLHL23      | 8.52E-141 | 1.208572018 | 0.475 | 0.097 |
| HRH2        | 8.49E-137 | 0.739383179 | 0.287 | 0.021 |
| RCSD1       | 1.78E-135 | 0.627488542 | 0.336 | 0.035 |
| MUSTN1      | 2.32E-135 | 2.865395321 | 0.534 | 0.146 |
| TRPC6       | 1.22E-133 | 1.249917574 | 0.362 | 0.046 |
| LINC01197   | 1.89E-132 | 0.846190648 | 0.374 | 0.05  |
| CRIP2       | 7.57E-131 | 1.638859434 | 0.705 | 0.324 |
| ISYNA1      | 7.87E-130 | 0.938055467 | 0.428 | 0.08  |
| RNF152      | 4.20E-129 | 1.678483738 | 0.592 | 0.191 |
| KCNE4       | 1.56E-127 | 1.434436751 | 0.574 | 0.166 |
| SEPTIN4     | 1.71E-127 | 0.9760121   | 0.42  | 0.079 |
| MYOM1       | 3.17E-127 | 0.820805713 | 0.336 | 0.041 |
| KALRN       | 5.18E-127 | 1.423855392 | 0.572 | 0.176 |

|           |           |             |       |       |
|-----------|-----------|-------------|-------|-------|
| LINC00924 | 7.16E-127 | 0.658577094 | 0.266 | 0.018 |
| RCAN2     | 7.59E-127 | 2.200491891 | 0.726 | 0.389 |
| FRZB      | 3.18E-126 | 1.405703594 | 0.525 | 0.142 |
| NEURL1B   | 1.14E-125 | 1.027272996 | 0.433 | 0.088 |
| ITGA8     | 1.54E-123 | 1.260648628 | 0.405 | 0.07  |
| CALD11    | 3.59E-122 | 1.192960037 | 0.961 | 0.948 |
| EBF2      | 1.15E-120 | 0.94928469  | 0.366 | 0.054 |
| MTHFD2    | 6.39E-120 | 1.304697565 | 0.643 | 0.259 |
| SUSD5     | 8.81E-120 | 0.860207042 | 0.31  | 0.037 |
| SNCG      | 2.83E-118 | 1.559971133 | 0.426 | 0.088 |
| CHCHD10   | 3.48E-118 | 1.226393928 | 0.72  | 0.321 |
| C1QTNF1   | 7.70E-117 | 1.428390323 | 0.638 | 0.272 |
| MAP3K7CL  | 6.64E-114 | 1.006198792 | 0.356 | 0.059 |
| NFASC     | 8.57E-113 | 0.871770279 | 0.446 | 0.104 |
| JPH2      | 1.98E-112 | 0.631374352 | 0.251 | 0.021 |
| HEY2      | 3.49E-112 | 0.653529045 | 0.339 | 0.051 |
| ACTG2     | 6.91E-111 | 1.228366057 | 0.525 | 0.134 |
| LAMA3     | 1.73E-110 | 1.266408817 | 0.341 | 0.055 |
| COL4A2    | 1.62E-109 | 2.050982604 | 0.761 | 0.465 |
| FABP4     | 3.29E-109 | 1.133869901 | 0.325 | 0.048 |
| MYL6      | 3.67E-109 | 1.204974989 | 0.959 | 0.957 |
| ANO1      | 1.03E-108 | 0.800378529 | 0.377 | 0.069 |
| CAV2      | 1.41E-108 | 1.333516258 | 0.657 | 0.33  |
| RASGRP2   | 3.07E-108 | 0.645956612 | 0.393 | 0.08  |
| LINC00702 | 8.83E-108 | 0.627961916 | 0.33  | 0.052 |
| COL4A1    | 8.98E-108 | 2.316641605 | 0.707 | 0.374 |
| RBPM2     | 1.53E-107 | 0.625786768 | 0.344 | 0.058 |
| NRARP     | 4.26E-107 | 1.04327775  | 0.366 | 0.068 |
| TPM11     | 5.40E-107 | 1.419820565 | 0.925 | 0.819 |
| PDE3A     | 8.63E-105 | 1.664351219 | 0.734 | 0.429 |
| KCNAB1    | 3.08E-104 | 0.766281452 | 0.321 | 0.05  |
| CAV1      | 9.44E-101 | 1.443808804 | 0.81  | 0.637 |
| EDNRA1    | 2.21E-100 | 1.104123752 | 0.58  | 0.212 |
| CNN1      | 3.63E-100 | 1.17251849  | 0.502 | 0.158 |
| SGCA      | 1.28E-99  | 0.600903707 | 0.31  | 0.047 |
| ID4       | 1.53E-97  | 1.567564286 | 0.634 | 0.291 |
| GRID1     | 1.13E-96  | 0.661785131 | 0.29  | 0.041 |
| EPS8      | 1.08E-95  | 1.717479106 | 0.741 | 0.534 |
| DYNC111   | 1.07E-94  | 0.884871395 | 0.361 | 0.074 |
| DSTN      | 2.22E-94  | 1.723833066 | 0.915 | 0.921 |
| ADIRF     | 8.12E-94  | 2.632083343 | 0.769 | 0.578 |
| KCNMA1    | 9.59E-94  | 1.035269981 | 0.31  | 0.053 |
| DTNA      | 5.47E-93  | 0.88993853  | 0.367 | 0.08  |

|           |          |             |       |       |
|-----------|----------|-------------|-------|-------|
| SYNE2     | 1.07E-91 | 1.263467657 | 0.661 | 0.345 |
| TMEM38B   | 1.20E-91 | 0.798002271 | 0.395 | 0.101 |
| CRIP1     | 4.28E-91 | 2.238019029 | 0.764 | 0.571 |
| ARHGEF17  | 4.53E-91 | 0.861853388 | 0.493 | 0.169 |
| PPP1R12A  | 2.48E-89 | 1.381996263 | 0.792 | 0.718 |
| TEX41     | 2.59E-88 | 0.897050891 | 0.32  | 0.06  |
| DENND3    | 4.13E-88 | 0.658082487 | 0.305 | 0.055 |
| ADCY3     | 4.92E-86 | 1.41140406  | 0.61  | 0.32  |
| CSRP1     | 6.70E-85 | 1.452251761 | 0.711 | 0.486 |
| SYNPO     | 8.41E-85 | 0.578144812 | 0.362 | 0.085 |
| SPECC11   | 9.36E-85 | 1.031569278 | 0.539 | 0.21  |
| PLCB4     | 2.60E-83 | 1.029053355 | 0.544 | 0.204 |
| ARHGEF7   | 9.22E-83 | 1.580534335 | 0.666 | 0.41  |
| LBH       | 1.29E-82 | 1.451871438 | 0.695 | 0.422 |
| JAG1      | 4.89E-82 | 1.231699772 | 0.608 | 0.317 |
| MERTK     | 3.95E-81 | 0.535006891 | 0.275 | 0.047 |
| PPP1R12B  | 4.61E-81 | 1.380250973 | 0.664 | 0.413 |
| COL18A1   | 1.45E-80 | 1.608628349 | 0.754 | 0.615 |
| ANGPT2    | 4.51E-79 | 1.116909885 | 0.392 | 0.112 |
| SLC22A3   | 1.15E-77 | 0.616662578 | 0.251 | 0.039 |
| MAGI1     | 2.42E-77 | 0.98666221  | 0.523 | 0.21  |
| PRKG11    | 3.31E-77 | 1.560962511 | 0.8   | 0.735 |
| UBA2      | 4.14E-77 | 1.204568797 | 0.667 | 0.461 |
| AKAP1     | 4.89E-77 | 0.744164767 | 0.366 | 0.1   |
| ACTN4     | 2.04E-76 | 1.181159961 | 0.739 | 0.56  |
| TTLL7     | 3.31E-76 | 0.775767664 | 0.416 | 0.131 |
| ACTB1     | 5.73E-75 | 0.9190341   | 0.966 | 0.963 |
| PLCE1     | 7.83E-75 | 1.392359724 | 0.577 | 0.294 |
| IGFBP2    | 1.33E-74 | 1.471441379 | 0.49  | 0.183 |
| NR2F2-AS1 | 2.73E-74 | 1.417972598 | 0.634 | 0.343 |
| FLNA      | 5.39E-74 | 1.71532388  | 0.79  | 0.726 |
| CALM2     | 2.30E-73 | 0.841559059 | 0.893 | 0.92  |
| DAAM2     | 3.74E-73 | 0.863344221 | 0.474 | 0.181 |
| MAP1B     | 1.35E-72 | 1.294470501 | 0.766 | 0.617 |
| SNTA1     | 4.01E-72 | 0.605875568 | 0.38  | 0.115 |
| SYNPO2    | 6.34E-72 | 1.290919035 | 0.707 | 0.44  |
| EPAS1     | 1.24E-71 | 1.314125402 | 0.703 | 0.496 |
| DMPK      | 3.88E-71 | 0.683612955 | 0.393 | 0.128 |
| TNS1      | 9.12E-71 | 1.240112252 | 0.733 | 0.577 |
| MOCS1     | 8.19E-70 | 0.546276706 | 0.3   | 0.069 |
| HIPK2     | 1.02E-69 | 1.398139914 | 0.651 | 0.4   |
| SEPTIN7   | 1.77E-69 | 0.763281217 | 0.9   | 0.901 |
| PHLDA2    | 6.26E-68 | 1.489497475 | 0.561 | 0.279 |

|          |          |             |       |       |
|----------|----------|-------------|-------|-------|
| LPP1     | 2.08E-66 | 1.326754839 | 0.836 | 0.888 |
| GUCY1B1  | 2.14E-64 | 0.835877224 | 0.533 | 0.259 |
| PGM5     | 2.70E-64 | 0.641466987 | 0.369 | 0.117 |
| DOCK8    | 4.16E-64 | 0.716788248 | 0.323 | 0.085 |
| NR2F2    | 6.05E-64 | 1.404595206 | 0.707 | 0.585 |
| PAWR1    | 9.66E-64 | 0.815973053 | 0.551 | 0.251 |
| CPM      | 4.91E-63 | 1.337974309 | 0.418 | 0.162 |
| DBNDD2   | 6.13E-62 | 0.967440825 | 0.628 | 0.389 |
| C11orf96 | 1.83E-61 | 2.073460293 | 0.772 | 0.636 |
| MGLL     | 2.20E-61 | 0.865892485 | 0.584 | 0.326 |
| ADAMTS4  | 8.14E-61 | 1.360350968 | 0.452 | 0.194 |
| MARK1    | 9.24E-61 | 0.745443133 | 0.387 | 0.129 |
| USP2     | 1.18E-60 | 0.600176678 | 0.29  | 0.075 |
| ACTN11   | 1.78E-60 | 0.882675988 | 0.731 | 0.441 |
| CAP2     | 4.57E-60 | 0.744157387 | 0.392 | 0.143 |
| SH3BGRL  | 4.70E-60 | 0.955054836 | 0.803 | 0.791 |
| ENPEP    | 1.30E-59 | 1.322788926 | 0.389 | 0.148 |
| MSRB31   | 1.40E-59 | 0.969329372 | 0.736 | 0.574 |
| RASAL21  | 2.50E-59 | 1.234648503 | 0.698 | 0.483 |
| SPARCL1  | 4.37E-59 | 1.554818317 | 0.839 | 0.784 |
| SEMA4B   | 3.65E-57 | 0.471943132 | 0.282 | 0.073 |
| GUCY1A11 | 4.43E-57 | 0.775520489 | 0.649 | 0.363 |
| CACNA1C1 | 7.34E-57 | 1.467888183 | 0.71  | 0.567 |
| RAB20    | 2.86E-56 | 0.472645357 | 0.261 | 0.064 |
| MFGE8    | 1.22E-54 | 1.132586547 | 0.807 | 0.807 |
| PTEN     | 1.36E-54 | 1.091345463 | 0.792 | 0.751 |
| AOC3     | 3.75E-54 | 0.77826828  | 0.451 | 0.206 |
| A2M1     | 9.58E-54 | 0.587822864 | 0.774 | 0.464 |
| ITGB11   | 6.15E-53 | 0.790445029 | 0.897 | 0.875 |
| LINGO1   | 2.08E-52 | 0.442731207 | 0.277 | 0.076 |
| LCLAT1   | 1.41E-51 | 0.698046553 | 0.416 | 0.178 |
| MYH91    | 2.48E-51 | 0.791221526 | 0.805 | 0.652 |
| RBPMS    | 3.49E-51 | 0.987635192 | 0.803 | 0.811 |
| MPRIP    | 9.35E-51 | 0.855217513 | 0.595 | 0.405 |
| TSC22D1  | 1.59E-50 | 1.36787918  | 0.787 | 0.766 |
| NUDT4    | 3.98E-50 | 1.047158397 | 0.651 | 0.47  |
| RNF180   | 1.28E-49 | 0.617852939 | 0.356 | 0.129 |
| KIAA0040 | 6.22E-49 | 0.65467443  | 0.443 | 0.2   |
| MALAT1   | 4.35E-48 | 0.752130539 | 0.931 | 0.976 |
| SOX51    | 7.36E-48 | 1.351141883 | 0.762 | 0.753 |
| ARHGAP44 | 1.16E-46 | 0.496215423 | 0.295 | 0.094 |
| GALNT18  | 4.28E-46 | 0.480060813 | 0.252 | 0.069 |
| FRMD4A   | 3.18E-45 | 0.986911853 | 0.615 | 0.42  |

|            |          |             |       |       |
|------------|----------|-------------|-------|-------|
| SMTN       | 3.66E-45 | 0.661726429 | 0.438 | 0.217 |
| CAVIN3     | 9.38E-45 | 0.956447614 | 0.816 | 0.802 |
| RASL11A    | 1.08E-44 | 0.677697559 | 0.433 | 0.201 |
| NCKAP5     | 1.97E-44 | 1.396959204 | 0.354 | 0.145 |
| AC012409.2 | 2.10E-44 | 0.711002361 | 0.339 | 0.128 |
| TLN11      | 2.59E-44 | 0.85190594  | 0.754 | 0.722 |
| NES        | 2.82E-44 | 0.603126684 | 0.325 | 0.123 |
| PDGFRB1    | 7.54E-44 | 1.04726703  | 0.72  | 0.687 |
| ATP1B3     | 1.09E-43 | 1.710049327 | 0.741 | 0.703 |
| PTMS       | 2.83E-43 | 0.668500836 | 0.862 | 0.812 |
| VPS13D     | 5.95E-43 | 1.072495753 | 0.595 | 0.435 |
| SELENOW    | 8.07E-43 | 0.697192619 | 0.833 | 0.854 |
| EHBP1L1    | 1.26E-42 | 0.645038395 | 0.426 | 0.213 |
| ARHGDIB    | 1.49E-42 | 0.731825785 | 0.339 | 0.13  |
| CCDC107    | 1.86E-42 | 0.94144772  | 0.623 | 0.481 |
| COX7A2     | 5.97E-42 | 0.716844838 | 0.813 | 0.815 |
| COL4A5     | 1.64E-41 | 0.643905039 | 0.328 | 0.127 |
| MGST3      | 2.84E-41 | 0.810637932 | 0.816 | 0.843 |
| GNAS       | 3.20E-41 | 0.497334519 | 0.946 | 0.954 |
| YBX1       | 3.43E-41 | 0.547231692 | 0.911 | 0.908 |
| GRIP2      | 4.90E-41 | 0.462324946 | 0.27  | 0.091 |
| HIP1       | 6.87E-41 | 0.940406232 | 0.615 | 0.435 |
| FADS3      | 7.27E-41 | 0.639824127 | 0.428 | 0.218 |
| LDLRAD3    | 1.22E-40 | 0.679686885 | 0.39  | 0.176 |
| PDE5A      | 1.87E-40 | 0.849758582 | 0.61  | 0.438 |
| ECE1       | 8.49E-40 | 0.899367807 | 0.546 | 0.376 |
| NOL3       | 1.25E-39 | 0.577644705 | 0.385 | 0.182 |
| FBLIM11    | 1.31E-39 | 0.712431088 | 0.513 | 0.297 |
| HMGB1      | 1.47E-39 | 0.526843844 | 0.934 | 0.936 |
| DGKH       | 2.33E-39 | 0.845259562 | 0.551 | 0.338 |
| LRRFIP11   | 4.27E-39 | 0.678568636 | 0.734 | 0.582 |
| DACT3      | 6.25E-39 | 0.28594761  | 0.285 | 0.105 |
| ANGPT1     | 1.41E-38 | 0.790048041 | 0.466 | 0.261 |
| WTIP       | 3.23E-38 | 0.816152924 | 0.433 | 0.244 |
| EHD2       | 3.63E-38 | 0.729718162 | 0.615 | 0.473 |
| ADAMTS1    | 3.69E-38 | 1.471688867 | 0.677 | 0.579 |
| PFN1       | 8.16E-38 | 0.773880466 | 0.877 | 0.88  |
| ROCK1      | 7.27E-37 | 0.731890571 | 0.751 | 0.717 |
| ARPC1A     | 8.40E-37 | 0.808060119 | 0.613 | 0.501 |
| FBXO321    | 1.18E-36 | 0.915842096 | 0.566 | 0.362 |
| MAPRE2     | 1.70E-36 | 0.878717258 | 0.607 | 0.446 |
| ZFH3       | 4.09E-36 | 1.686343696 | 0.69  | 0.709 |
| RAMP1      | 5.64E-36 | 0.609465376 | 0.398 | 0.19  |



|          |          |             |       |       |
|----------|----------|-------------|-------|-------|
| ADCY6    | 8.64E-36 | 0.402030435 | 0.31  | 0.127 |
| COX5B    | 8.76E-36 | 0.519365818 | 0.821 | 0.838 |
| UQCRB    | 2.02E-35 | 0.532857414 | 0.88  | 0.877 |
| UTRN     | 2.28E-35 | 0.981116233 | 0.764 | 0.79  |
| SYNGR2   | 2.31E-35 | 0.381803509 | 0.264 | 0.094 |
| COX6A1   | 2.48E-35 | 0.609647599 | 0.803 | 0.8   |
| SLC25A4  | 2.68E-34 | 0.76455734  | 0.48  | 0.311 |
| MAP3K20  | 2.83E-34 | 0.928624782 | 0.695 | 0.668 |
| NDRG2    | 7.53E-34 | 0.626781899 | 0.482 | 0.281 |
| ZBTB7C   | 8.97E-34 | 1.012088596 | 0.37  | 0.19  |
| NBEAL1   | 1.23E-33 | 0.87801805  | 0.689 | 0.632 |
| ARHGAP42 | 1.78E-33 | 0.899880007 | 0.511 | 0.336 |
| CSRNP3   | 9.11E-33 | 0.517721258 | 0.279 | 0.109 |
| CRIM1    | 1.39E-32 | 0.786382031 | 0.598 | 0.423 |
| NCK2     | 1.89E-32 | 0.568192377 | 0.467 | 0.283 |
| INPP5A   | 2.00E-32 | 0.595969317 | 0.438 | 0.249 |
| B3GNT2   | 2.93E-32 | 0.421184554 | 0.346 | 0.16  |
| MAML3    | 5.05E-32 | 0.775555653 | 0.457 | 0.259 |
| COX7B    | 1.13E-31 | 0.597842333 | 0.754 | 0.71  |
| MSN      | 2.50E-31 | 0.710578047 | 0.716 | 0.641 |
| CAMK2G   | 2.78E-31 | 0.61872185  | 0.359 | 0.185 |
| TNS31    | 3.10E-31 | 0.599087085 | 0.392 | 0.197 |
| CFL11    | 3.42E-31 | 0.611096274 | 0.918 | 0.91  |
| FCHSD2   | 3.71E-31 | 1.042669664 | 0.562 | 0.427 |
| PGF      | 5.58E-31 | 0.692969144 | 0.398 | 0.216 |
| BCL6     | 5.79E-31 | 0.692150063 | 0.561 | 0.393 |
| MOB2     | 6.51E-31 | 0.701970771 | 0.461 | 0.297 |
| SLC44A2  | 9.06E-31 | 0.499414841 | 0.331 | 0.16  |
| XKR6     | 9.53E-31 | 0.476362087 | 0.284 | 0.116 |
| A1BG     | 1.10E-30 | 0.410107497 | 0.326 | 0.147 |
| ITPK1    | 1.41E-30 | 0.43558467  | 0.277 | 0.114 |
| CACNB21  | 2.98E-30 | 0.916313794 | 0.579 | 0.408 |
| ARHGAP17 | 4.48E-30 | 0.66130236  | 0.47  | 0.309 |
| RASD1    | 5.90E-30 | 0.951386238 | 0.338 | 0.162 |
| CRTC3    | 8.23E-30 | 0.67643152  | 0.53  | 0.38  |
| ATP8B1   | 1.71E-29 | 0.596731085 | 0.392 | 0.212 |
| TGFB1I11 | 3.04E-29 | 0.606892233 | 0.682 | 0.59  |
| PDLIM51  | 3.07E-29 | 0.839115354 | 0.674 | 0.587 |
| H3F3A    | 3.28E-29 | 0.368513983 | 0.928 | 0.938 |
| OAZ2     | 8.31E-29 | 0.680617822 | 0.516 | 0.396 |
| HNRNPA3  | 9.19E-29 | 0.520215175 | 0.793 | 0.775 |
| LRRC32   | 1.00E-28 | 0.429771144 | 0.343 | 0.17  |
| ROCK2    | 1.28E-28 | 0.733592496 | 0.685 | 0.66  |

|             |          |             |       |       |
|-------------|----------|-------------|-------|-------|
| SLC35F1     | 1.54E-28 | 0.761047293 | 0.315 | 0.15  |
| IFITM2      | 1.63E-28 | 0.685744646 | 0.87  | 0.879 |
| MIR29B2CHG  | 2.18E-28 | 0.57685434  | 0.4   | 0.224 |
| ETS2        | 2.50E-28 | 0.740303387 | 0.541 | 0.395 |
| CYCS        | 3.45E-28 | 0.896576886 | 0.656 | 0.577 |
| NEXN        | 3.91E-28 | 0.832675913 | 0.695 | 0.611 |
| SYTL21      | 4.66E-28 | 0.58711736  | 0.425 | 0.232 |
| TOB1        | 6.89E-28 | 0.834694378 | 0.525 | 0.389 |
| CDC42EP4    | 7.12E-28 | 0.526627853 | 0.367 | 0.196 |
| PICALM1     | 7.74E-28 | 0.736237484 | 0.71  | 0.667 |
| SMIM12      | 1.10E-27 | 0.47264217  | 0.416 | 0.246 |
| WDR1        | 1.32E-27 | 0.656450159 | 0.593 | 0.485 |
| COBLL1      | 1.78E-27 | 0.712033486 | 0.603 | 0.486 |
| PLS3        | 1.18E-26 | 0.617897651 | 0.661 | 0.598 |
| RASL12      | 1.45E-26 | 0.597122236 | 0.4   | 0.243 |
| ARHGAP61    | 1.67E-26 | 0.750001941 | 0.556 | 0.385 |
| MEF2D       | 1.90E-26 | 0.61587573  | 0.5   | 0.355 |
| SKP1        | 2.13E-26 | 0.442200867 | 0.879 | 0.896 |
| TPM41       | 2.56E-26 | 0.674439843 | 0.889 | 0.844 |
| COX8A       | 2.69E-26 | 0.575579795 | 0.77  | 0.748 |
| KLHL29      | 2.73E-26 | 0.663894903 | 0.413 | 0.241 |
| ATP5MC2     | 3.13E-26 | 0.47239102  | 0.834 | 0.853 |
| NIBAN1      | 6.14E-26 | 0.839774544 | 0.58  | 0.447 |
| SH3RF31     | 8.19E-26 | 0.772571214 | 0.633 | 0.521 |
| GAPDH1      | 1.28E-25 | 0.830170073 | 0.959 | 0.951 |
| FOXC1       | 1.45E-25 | 0.619183475 | 0.348 | 0.187 |
| PPIA        | 3.34E-25 | 0.513753426 | 0.939 | 0.933 |
| S1PR3       | 3.42E-25 | 0.496398939 | 0.354 | 0.192 |
| HES1        | 3.48E-25 | 0.798344541 | 0.534 | 0.366 |
| TGFBI1      | 5.03E-25 | 0.927715548 | 0.5   | 0.294 |
| EPN2        | 6.29E-25 | 0.653540796 | 0.544 | 0.431 |
| SMARCD3     | 7.86E-25 | 0.466749384 | 0.343 | 0.194 |
| PPP1R12C    | 9.36E-25 | 0.515005174 | 0.405 | 0.252 |
| UQCRH       | 1.14E-24 | 0.535496687 | 0.797 | 0.799 |
| ZNF703      | 1.64E-24 | 0.521515221 | 0.411 | 0.25  |
| TACC2       | 1.98E-24 | 0.494982157 | 0.359 | 0.196 |
| B2M         | 2.12E-24 | 0.54844014  | 0.985 | 0.989 |
| FABP5       | 3.33E-24 | 0.829002837 | 0.446 | 0.296 |
| PALM2-AKAP2 | 5.44E-24 | 0.707655969 | 0.633 | 0.521 |
| ATP2B4      | 5.95E-24 | 0.658383595 | 0.597 | 0.513 |
| NDUFA4      | 1.31E-23 | 0.80257448  | 0.813 | 0.866 |
| NDUFB10     | 2.66E-23 | 0.532004367 | 0.77  | 0.751 |
| ODC1        | 2.73E-23 | 0.481200677 | 0.469 | 0.311 |

|          |          |             |       |       |
|----------|----------|-------------|-------|-------|
| SMIM10   | 6.41E-23 | 0.452965433 | 0.372 | 0.219 |
| SMOC2    | 8.71E-23 | 0.876293202 | 0.523 | 0.413 |
| PLXND1   | 8.83E-23 | 0.461195063 | 0.325 | 0.176 |
| SNRK     | 1.19E-22 | 0.580934365 | 0.39  | 0.25  |
| ENAH1    | 1.28E-22 | 0.657374711 | 0.698 | 0.614 |
| ATP5F1B  | 1.94E-22 | 0.51212428  | 0.746 | 0.746 |
| CDKN1A   | 4.51E-22 | 0.926839299 | 0.61  | 0.494 |
| RNF1501  | 5.33E-22 | 0.785420467 | 0.372 | 0.216 |
| OLFML2A  | 7.02E-22 | 0.494118625 | 0.305 | 0.161 |
| NHS      | 1.05E-21 | 0.699199265 | 0.502 | 0.348 |
| EOGT     | 1.16E-21 | 0.48852127  | 0.303 | 0.165 |
| TRAF5    | 1.59E-21 | 0.372749287 | 0.343 | 0.197 |
| PPP1CB   | 1.75E-21 | 0.751520929 | 0.711 | 0.739 |
| HSDL2    | 1.85E-21 | 0.553687049 | 0.382 | 0.245 |
| FAM241A  | 2.58E-21 | 0.414052893 | 0.359 | 0.201 |
| CHCHD2   | 2.73E-21 | 0.416949208 | 0.892 | 0.894 |
| NDUFA7   | 3.01E-21 | 0.527708793 | 0.477 | 0.359 |
| SMAP2    | 3.41E-21 | 0.440256779 | 0.41  | 0.256 |
| CALM1    | 4.27E-21 | 0.444269251 | 0.918 | 0.929 |
| GUCY1A21 | 4.59E-21 | 0.751035565 | 0.364 | 0.223 |
| KTN1     | 5.42E-21 | 0.527195628 | 0.785 | 0.787 |
| LDHB     | 8.07E-21 | 0.483232735 | 0.731 | 0.717 |
| ARPC5    | 9.38E-21 | 0.5306202   | 0.744 | 0.761 |
| CHURC1   | 1.05E-20 | 0.54699326  | 0.711 | 0.7   |
| CAMTA1   | 1.07E-20 | 0.439832049 | 0.684 | 0.628 |
| LGALS1   | 1.18E-20 | 0.37486492  | 0.302 | 0.161 |
| MYO1B1   | 1.41E-20 | 0.783276247 | 0.564 | 0.44  |
| NDUFB7   | 1.77E-20 | 0.471902156 | 0.761 | 0.772 |
| NDUFS2   | 2.00E-20 | 0.541082012 | 0.58  | 0.505 |
| STOM     | 3.51E-20 | 0.644258675 | 0.672 | 0.645 |
| PDCL3    | 4.00E-20 | 0.399733048 | 0.33  | 0.194 |
| ADGRE5   | 4.38E-20 | 0.317398025 | 0.344 | 0.194 |
| ITPR1    | 4.47E-20 | 0.518207846 | 0.549 | 0.422 |
| NDUFB8   | 5.63E-20 | 0.4385512   | 0.777 | 0.792 |
| ITGA12   | 5.72E-20 | 0.923058271 | 0.53  | 0.429 |
| HDAC9    | 7.58E-20 | 0.645919199 | 0.256 | 0.127 |
| VASP     | 7.83E-20 | 0.349573202 | 0.51  | 0.372 |
| SLC25A6  | 9.58E-20 | 0.413441622 | 0.852 | 0.866 |
| YBX3     | 1.13E-19 | 0.668138648 | 0.834 | 0.88  |
| LBR      | 1.14E-19 | 0.37472408  | 0.349 | 0.207 |
| VCL1     | 1.14E-19 | 0.579803898 | 0.68  | 0.658 |
| COX7A1   | 1.62E-19 | 0.612752689 | 0.649 | 0.589 |
| SBDS     | 2.05E-19 | 0.534675153 | 0.715 | 0.729 |

|             |          |             |       |       |
|-------------|----------|-------------|-------|-------|
| FAM13C      | 2.29E-19 | 0.762184893 | 0.423 | 0.29  |
| ETS11       | 2.70E-19 | 0.609913895 | 0.536 | 0.416 |
| ANP32B      | 2.82E-19 | 0.517858815 | 0.707 | 0.656 |
| PKIG        | 3.15E-19 | 0.558142836 | 0.659 | 0.597 |
| CPE1        | 3.21E-19 | 0.539273697 | 0.728 | 0.608 |
| RABGAP1     | 3.42E-19 | 0.640184421 | 0.523 | 0.428 |
| RSU1        | 4.91E-19 | 0.488327547 | 0.584 | 0.501 |
| SOX13       | 5.11E-19 | 0.352834641 | 0.254 | 0.126 |
| PPP2R5A     | 9.62E-19 | 0.57534605  | 0.407 | 0.28  |
| BCL2        | 1.05E-18 | 0.666949671 | 0.392 | 0.257 |
| COX6C       | 1.22E-18 | 0.416294735 | 0.83  | 0.857 |
| AC083870.11 | 1.47E-18 | 0.47038647  | 0.47  | 0.33  |
| TOB2        | 1.58E-18 | 0.566751555 | 0.477 | 0.369 |
| RHOB        | 1.60E-18 | 1.0167772   | 0.746 | 0.767 |
| INF2        | 1.74E-18 | 0.374097977 | 0.315 | 0.183 |
| GPATCH4     | 2.19E-18 | 0.345332267 | 0.338 | 0.204 |
| PLEKHO11    | 2.28E-18 | 0.431762834 | 0.47  | 0.333 |
| ATP5MD      | 2.73E-18 | 0.442467782 | 0.721 | 0.724 |
| TMSB4X      | 2.92E-18 | 0.349347553 | 0.975 | 0.988 |
| COX17       | 3.00E-18 | 0.540603216 | 0.544 | 0.465 |
| SNHG15      | 3.03E-18 | 0.560883463 | 0.377 | 0.255 |
| BTG1        | 3.35E-18 | 0.785825553 | 0.815 | 0.824 |
| EPSTI11     | 3.44E-18 | 0.261094157 | 0.19  | 0.409 |
| ATP5MG      | 3.48E-18 | 0.416343324 | 0.834 | 0.854 |
| CBX7        | 3.86E-18 | 0.336895755 | 0.279 | 0.15  |
| ZBTB38      | 4.08E-18 | 0.567182148 | 0.633 | 0.583 |
| GADD45B     | 4.35E-18 | 1.469570401 | 0.728 | 0.756 |
| CRYAB       | 4.82E-18 | 0.87531351  | 0.631 | 0.589 |
| ATP5F1D     | 5.45E-18 | 0.395761569 | 0.787 | 0.801 |
| PFDN5       | 6.14E-18 | 0.332825812 | 0.907 | 0.915 |
| ZNRF2       | 6.17E-18 | 0.531466726 | 0.334 | 0.202 |
| PACSIN2     | 7.33E-18 | 0.561601154 | 0.58  | 0.493 |
| ATP10A      | 1.13E-17 | 0.610689101 | 0.507 | 0.395 |
| DOCK10      | 1.75E-17 | 0.429205378 | 0.328 | 0.19  |
| RERG        | 2.61E-17 | 0.668134022 | 0.544 | 0.415 |
| CREM        | 2.78E-17 | 0.787970236 | 0.546 | 0.466 |
| PDE1A1      | 2.99E-17 | 0.613480266 | 0.51  | 0.368 |
| ARID5A      | 3.12E-17 | 0.437255792 | 0.362 | 0.238 |
| UQCR11      | 4.39E-17 | 0.424541689 | 0.772 | 0.773 |
| PITPNC1     | 4.90E-17 | 0.790800647 | 0.515 | 0.41  |
| ACTR31      | 5.93E-17 | 0.430874428 | 0.684 | 0.624 |
| FKBP51      | 6.52E-17 | 0.719631757 | 0.772 | 0.769 |
| SELENOM     | 6.68E-17 | 0.520807445 | 0.889 | 0.919 |

|            |          |             |       |       |
|------------|----------|-------------|-------|-------|
| ARHGAP15   | 6.95E-17 | 0.587391232 | 0.323 | 0.19  |
| SLCO3A1    | 7.60E-17 | 0.682374449 | 0.582 | 0.512 |
| ANXA6      | 9.89E-17 | 0.461859732 | 0.664 | 0.645 |
| FILIP1L    | 1.08E-16 | 0.576231097 | 0.821 | 0.791 |
| LARGE1     | 1.11E-16 | 0.866190568 | 0.53  | 0.442 |
| HLA-F      | 1.17E-16 | 0.520345183 | 0.502 | 0.408 |
| HNRNPA1    | 1.23E-16 | 0.383015141 | 0.852 | 0.884 |
| DGKD       | 1.54E-16 | 0.397113437 | 0.339 | 0.213 |
| ARHGEF25   | 1.76E-16 | 0.341858877 | 0.285 | 0.169 |
| FGD4       | 1.83E-16 | 0.642834325 | 0.443 | 0.33  |
| CKB        | 2.10E-16 | 0.686238925 | 0.382 | 0.263 |
| RRAD       | 2.19E-16 | 0.781663206 | 0.431 | 0.287 |
| CD151      | 3.48E-16 | 0.666437551 | 0.754 | 0.804 |
| ARPC21     | 3.69E-16 | 0.443370292 | 0.83  | 0.85  |
| SGIP11     | 3.78E-16 | 1.178715318 | 0.4   | 0.284 |
| L3MBTL4    | 4.16E-16 | 0.537010251 | 0.326 | 0.203 |
| BHLHE40    | 4.77E-16 | 0.563639917 | 0.485 | 0.374 |
| NACC2      | 5.22E-16 | 0.30652274  | 0.251 | 0.137 |
| HOPX1      | 5.50E-16 | 0.563755279 | 0.346 | 0.21  |
| TACC11     | 5.62E-16 | 0.707737614 | 0.779 | 0.825 |
| MAP7D3     | 6.68E-16 | 0.487553528 | 0.443 | 0.335 |
| COX14      | 8.24E-16 | 0.449765892 | 0.562 | 0.515 |
| ARHGAP291  | 8.35E-16 | 0.512069591 | 0.518 | 0.397 |
| CAP1       | 9.50E-16 | 0.525989715 | 0.71  | 0.721 |
| SLC25A3    | 1.08E-15 | 0.331723777 | 0.828 | 0.869 |
| PTK21      | 1.15E-15 | 0.486535175 | 0.715 | 0.714 |
| IL6R       | 1.21E-15 | 0.357112391 | 0.27  | 0.15  |
| POMP       | 1.57E-15 | 0.396808714 | 0.739 | 0.756 |
| AC068888.1 | 1.94E-15 | 0.335846217 | 0.32  | 0.202 |
| SH3RF1     | 2.26E-15 | 0.582046029 | 0.407 | 0.288 |
| CCND1      | 2.59E-15 | 0.645818607 | 0.505 | 0.385 |
| CDS2       | 2.78E-15 | 0.392094201 | 0.321 | 0.204 |
| MAT2A      | 3.10E-15 | 0.630284579 | 0.57  | 0.496 |
| ILK1       | 3.14E-15 | 0.497097599 | 0.664 | 0.654 |
| GLRX5      | 3.32E-15 | 0.440351807 | 0.544 | 0.48  |
| AFF3       | 3.68E-15 | 0.571105826 | 0.254 | 0.138 |
| GAMT       | 5.22E-15 | 0.419864048 | 0.334 | 0.227 |
| MRTFB      | 5.66E-15 | 0.617017815 | 0.411 | 0.308 |
| RRAS       | 6.34E-15 | 0.542772055 | 0.72  | 0.709 |
| SORBS11    | 9.12E-15 | 0.74697341  | 0.536 | 0.467 |
| KANK2      | 1.09E-14 | 0.542538849 | 0.595 | 0.569 |
| AC025280.3 | 1.20E-14 | 0.416148864 | 0.279 | 0.167 |
| FILIP11    | 1.28E-14 | 0.652414283 | 0.562 | 0.489 |

|          |          |             |       |       |
|----------|----------|-------------|-------|-------|
| FOXK2    | 1.67E-14 | 0.41630328  | 0.425 | 0.32  |
| FAU      | 2.32E-14 | 0.279415558 | 0.941 | 0.954 |
| CD59     | 2.74E-14 | 0.579940989 | 0.826 | 0.866 |
| TMEM131L | 3.09E-14 | 0.708778218 | 0.467 | 0.371 |
| SNRPB    | 3.81E-14 | 0.504110456 | 0.687 | 0.668 |
| ENDOD1   | 4.77E-14 | 0.327527758 | 0.266 | 0.158 |
| NT5DC21  | 4.82E-14 | 0.412865111 | 0.372 | 0.255 |
| CERS61   | 5.07E-14 | 0.564642696 | 0.346 | 0.233 |
| MYO1D    | 5.41E-14 | 0.625586405 | 0.597 | 0.535 |
| PRMT9    | 7.05E-14 | 0.479474755 | 0.257 | 0.151 |
| SYPL1    | 7.85E-14 | 0.36849101  | 0.577 | 0.524 |
| MKMK2    | 8.66E-14 | 0.474432321 | 0.415 | 0.317 |
| ATP5PF   | 1.04E-13 | 0.391303209 | 0.789 | 0.816 |
| BCAS3    | 1.13E-13 | 0.666531669 | 0.6   | 0.563 |
| CDH131   | 1.46E-13 | 0.422092408 | 0.28  | 0.166 |
| SLC25A5  | 1.47E-13 | 0.461213244 | 0.623 | 0.6   |
| SSBP2    | 1.67E-13 | 0.698667616 | 0.7   | 0.737 |
| RGS161   | 1.88E-13 | 0.924325345 | 0.416 | 0.289 |
| PPFIA21  | 2.35E-13 | 0.419164393 | 0.277 | 0.167 |
| CSDE1    | 2.37E-13 | 0.392810172 | 0.762 | 0.793 |
| PMEPA11  | 2.57E-13 | 0.384376879 | 0.662 | 0.543 |
| MRPL33   | 2.72E-13 | 0.490852026 | 0.603 | 0.573 |
| NR4A3    | 3.21E-13 | 0.536406877 | 0.433 | 0.309 |
| B3GALNT2 | 3.60E-13 | 0.420961883 | 0.357 | 0.246 |
| TAX1BP1  | 3.94E-13 | 0.380625988 | 0.703 | 0.718 |
| SLC25A25 | 4.21E-13 | 0.373551627 | 0.333 | 0.229 |
| BST21    | 5.44E-13 | 0.441685655 | 0.564 | 0.424 |
| TLE1     | 5.70E-13 | 0.512235889 | 0.546 | 0.482 |
| MICU3    | 5.89E-13 | 0.404143816 | 0.395 | 0.293 |
| TCIM     | 8.22E-13 | 0.731290209 | 0.277 | 0.17  |
| TNC1     | 8.96E-13 | 0.713743773 | 0.393 | 0.263 |
| CSNK1A1  | 9.65E-13 | 0.42568703  | 0.751 | 0.797 |
| RASSF3   | 9.94E-13 | 0.292718834 | 0.272 | 0.165 |
| AOPEP1   | 1.12E-12 | 0.334999318 | 0.725 | 0.687 |
| STK38L   | 1.26E-12 | 0.384605036 | 0.456 | 0.349 |
| PCSK7    | 1.53E-12 | 0.370808571 | 0.357 | 0.255 |
| CTBP2    | 2.30E-12 | 0.514667884 | 0.58  | 0.557 |
| PDLIM71  | 2.56E-12 | 0.497068813 | 0.567 | 0.505 |
| PGM2     | 2.80E-12 | 0.277332128 | 0.264 | 0.164 |
| GUK1     | 2.98E-12 | 0.450617667 | 0.828 | 0.845 |
| NDUFB4   | 3.45E-12 | 0.422552797 | 0.754 | 0.769 |
| PIP4K2A  | 3.47E-12 | 0.496226635 | 0.457 | 0.376 |
| TGFB1    | 3.55E-12 | 0.523041972 | 0.479 | 0.387 |

|          |          |             |       |       |
|----------|----------|-------------|-------|-------|
| ANAPC16  | 6.37E-12 | 0.445951517 | 0.679 | 0.705 |
| FARP11   | 6.49E-12 | 0.352677903 | 0.613 | 0.487 |
| SRSF3    | 8.18E-12 | 0.425631208 | 0.793 | 0.844 |
| NRP1     | 9.94E-12 | 0.525561002 | 0.533 | 0.457 |
| VIM      | 9.95E-12 | 0.311555647 | 0.966 | 0.985 |
| LIMS2    | 1.04E-11 | 0.31286673  | 0.284 | 0.185 |
| CPEB41   | 1.06E-11 | 0.365047448 | 0.457 | 0.36  |
| POR      | 1.09E-11 | 0.399506125 | 0.47  | 0.399 |
| NDUFS6   | 1.19E-11 | 0.388412521 | 0.692 | 0.7   |
| NMD3     | 1.23E-11 | 0.531019553 | 0.449 | 0.372 |
| CHSY11   | 1.40E-11 | 0.554173604 | 0.503 | 0.441 |
| GPCPD1   | 1.71E-11 | 0.324540215 | 0.484 | 0.394 |
| RELL1    | 1.98E-11 | 0.472931616 | 0.47  | 0.397 |
| TRAK1    | 2.09E-11 | 0.510539116 | 0.475 | 0.398 |
| ABHD2    | 2.26E-11 | 0.540338167 | 0.493 | 0.432 |
| LURAP1L  | 2.49E-11 | 0.521628324 | 0.37  | 0.278 |
| ZNF331   | 2.75E-11 | 0.87169206  | 0.407 | 0.33  |
| BGN1     | 2.90E-11 | 0.375122009 | 0.843 | 0.747 |
| TBL1X    | 2.92E-11 | 0.480606671 | 0.469 | 0.385 |
| SSBP3    | 3.01E-11 | 0.525011365 | 0.48  | 0.426 |
| PLCL1    | 3.10E-11 | 0.540429855 | 0.426 | 0.328 |
| CBX6     | 3.64E-11 | 0.421316552 | 0.444 | 0.373 |
| TMEM47   | 4.59E-11 | 0.484229614 | 0.492 | 0.435 |
| MTUS1    | 4.74E-11 | 0.534418661 | 0.57  | 0.535 |
| MXI1     | 4.98E-11 | 0.435881717 | 0.457 | 0.389 |
| TBCA     | 5.25E-11 | 0.384732253 | 0.764 | 0.801 |
| COX4I1   | 6.30E-11 | 0.309258158 | 0.864 | 0.891 |
| PHLDA1   | 7.20E-11 | 0.616795321 | 0.644 | 0.611 |
| ZNF141   | 8.29E-11 | 0.491288294 | 0.28  | 0.191 |
| ISG151   | 8.55E-11 | 0.418329302 | 0.592 | 0.51  |
| EIF1AY   | 8.81E-11 | 0.442243848 | 0.284 | 0.19  |
| HIF1A1   | 9.00E-11 | 0.361107907 | 0.664 | 0.638 |
| EIF2S3   | 9.72E-11 | 0.347478234 | 0.567 | 0.524 |
| UBL5     | 1.00E-10 | 0.39937745  | 0.793 | 0.823 |
| SUN1     | 1.08E-10 | 0.388689321 | 0.464 | 0.388 |
| NDUFA13  | 1.15E-10 | 0.302224481 | 0.852 | 0.876 |
| AXL      | 1.16E-10 | 0.543630324 | 0.621 | 0.628 |
| CAVIN1   | 1.19E-10 | 0.435252935 | 0.785 | 0.845 |
| COX6B1   | 1.59E-10 | 0.345117734 | 0.805 | 0.824 |
| HOXB-AS1 | 1.64E-10 | 0.404079128 | 0.361 | 0.266 |
| MYLIP    | 2.05E-10 | 0.598928498 | 0.531 | 0.482 |
| HINT1    | 2.65E-10 | 0.294067507 | 0.844 | 0.856 |
| IK       | 2.82E-10 | 0.402358469 | 0.564 | 0.533 |

|          |          |             |       |       |
|----------|----------|-------------|-------|-------|
| KLF91    | 2.85E-10 | 0.476494695 | 0.741 | 0.802 |
| CBL      | 3.02E-10 | 0.270777169 | 0.3   | 0.203 |
| SLC39A11 | 3.55E-10 | 0.469544316 | 0.346 | 0.262 |
| PCGF5    | 3.62E-10 | 0.380128784 | 0.489 | 0.424 |
| ZEB2     | 3.89E-10 | 0.546496626 | 0.705 | 0.755 |
| OPA3     | 4.25E-10 | 0.312887148 | 0.316 | 0.22  |
| ADGRB31  | 4.40E-10 | 0.583733602 | 0.325 | 0.224 |
| KIF1C    | 4.86E-10 | 0.350886425 | 0.297 | 0.211 |
| NDUFV2   | 5.27E-10 | 0.324421085 | 0.713 | 0.742 |
| IER5L    | 5.43E-10 | 0.524020977 | 0.569 | 0.513 |
| NET1     | 5.45E-10 | 0.758168571 | 0.438 | 0.379 |
| SET      | 5.53E-10 | 0.356505628 | 0.728 | 0.742 |
| NDUFS5   | 5.56E-10 | 0.378164954 | 0.823 | 0.861 |
| CYSTM1   | 6.54E-10 | 0.399957227 | 0.626 | 0.639 |
| UBE2D2   | 6.87E-10 | 0.314440465 | 0.692 | 0.7   |
| CD9      | 8.05E-10 | 0.456885043 | 0.682 | 0.684 |
| H3F3B    | 8.27E-10 | 0.267438785 | 0.93  | 0.954 |
| CPT1A    | 9.44E-10 | 0.417693729 | 0.315 | 0.232 |
| CDC42    | 9.44E-10 | 0.368050136 | 0.811 | 0.83  |
| RAB13    | 9.62E-10 | 0.436847846 | 0.705 | 0.679 |
| NDUFB2   | 1.03E-09 | 0.413716787 | 0.739 | 0.774 |
| APBB21   | 1.11E-09 | 0.560836641 | 0.656 | 0.656 |
| TJP1     | 1.17E-09 | 0.556929003 | 0.598 | 0.591 |
| NCL      | 1.24E-09 | 0.362802038 | 0.761 | 0.805 |
| SPEN     | 1.35E-09 | 0.334100422 | 0.502 | 0.427 |
| CSNK1E   | 1.47E-09 | 0.368165995 | 0.536 | 0.508 |
| KIAA0232 | 1.61E-09 | 0.467542872 | 0.49  | 0.442 |
| YWHAZ    | 1.78E-09 | 0.277415753 | 0.792 | 0.835 |
| COX7C    | 1.90E-09 | 0.254544415 | 0.851 | 0.89  |
| CHMP4A   | 2.12E-09 | 0.291179602 | 0.5   | 0.446 |
| NDUFA12  | 2.33E-09 | 0.327765467 | 0.644 | 0.656 |
| C12orf57 | 2.43E-09 | 0.338964402 | 0.839 | 0.864 |
| DLEU2    | 3.02E-09 | 0.472995741 | 0.449 | 0.37  |
| EIF4A1   | 3.16E-09 | 0.360457033 | 0.877 | 0.907 |
| EDIL31   | 3.32E-09 | 0.489153033 | 0.487 | 0.406 |
| PAG11    | 4.05E-09 | 0.739996806 | 0.361 | 0.28  |
| VWA8     | 4.38E-09 | 0.379490346 | 0.384 | 0.293 |
| PCED1B   | 4.76E-09 | 0.526326811 | 0.275 | 0.191 |
| ATP2A21  | 5.18E-09 | 0.302653667 | 0.646 | 0.631 |
| NDUFA1   | 6.28E-09 | 0.362671754 | 0.702 | 0.747 |
| GRK51    | 6.31E-09 | 0.586533739 | 0.557 | 0.521 |
| ELOB     | 6.63E-09 | 0.376118951 | 0.823 | 0.852 |
| ETV61    | 6.64E-09 | 0.43852376  | 0.587 | 0.554 |



|           |          |             |       |       |
|-----------|----------|-------------|-------|-------|
| HCFC1R1   | 8.63E-09 | 0.446807749 | 0.689 | 0.701 |
| LINC00910 | 9.24E-09 | 0.417342801 | 0.251 | 0.17  |
| RAN       | 9.31E-09 | 0.339849355 | 0.736 | 0.762 |
| SELENOK   | 1.06E-08 | 0.352672161 | 0.666 | 0.69  |
| TEAD3     | 1.07E-08 | 0.294397959 | 0.318 | 0.238 |
| CCT6A     | 1.08E-08 | 0.388590033 | 0.538 | 0.5   |
| RAPGEF21  | 1.19E-08 | 0.388892544 | 0.541 | 0.489 |
| ARHGEF12  | 1.20E-08 | 0.470853232 | 0.557 | 0.537 |
| SMURF1    | 1.25E-08 | 0.461560467 | 0.51  | 0.455 |
| NDUFB11   | 1.38E-08 | 0.392185461 | 0.746 | 0.745 |
| PTN       | 1.50E-08 | 0.342762177 | 0.318 | 0.514 |
| CABIN1    | 1.53E-08 | 0.331651725 | 0.369 | 0.294 |
| MYO1C     | 1.68E-08 | 0.315958793 | 0.533 | 0.506 |
| EIF3H     | 1.79E-08 | 0.310872716 | 0.743 | 0.78  |
| CRISPLD2  | 1.85E-08 | 0.962169554 | 0.682 | 0.801 |
| MRPL32    | 1.92E-08 | 0.365974613 | 0.477 | 0.445 |
| UQCRC1    | 2.32E-08 | 0.335530896 | 0.466 | 0.409 |
| MICOS10   | 2.65E-08 | 0.300983771 | 0.741 | 0.782 |
| CCT3      | 2.68E-08 | 0.34928765  | 0.59  | 0.603 |
| PURB      | 2.69E-08 | 0.270401009 | 0.346 | 0.268 |
| HIST1H4C  | 2.75E-08 | 0.496233167 | 0.484 | 0.445 |
| SMIM31    | 2.86E-08 | 0.328056927 | 0.47  | 0.404 |
| ABTB1     | 3.56E-08 | 0.307272446 | 0.277 | 0.2   |
| OSBPL1A   | 3.58E-08 | 0.374145762 | 0.53  | 0.509 |
| EXOC2     | 3.92E-08 | 0.342540172 | 0.308 | 0.235 |
| COX20     | 4.03E-08 | 0.377458789 | 0.502 | 0.473 |
| TOMM20    | 4.41E-08 | 0.309549686 | 0.723 | 0.774 |
| ADCY9     | 5.10E-08 | 0.351262055 | 0.3   | 0.224 |
| SUSD61    | 5.12E-08 | 0.317265081 | 0.454 | 0.391 |
| NDUFA6    | 6.14E-08 | 0.324884008 | 0.577 | 0.562 |
| UBXN1     | 6.34E-08 | 0.366258192 | 0.644 | 0.669 |
| DBI       | 6.39E-08 | 0.456716223 | 0.728 | 0.779 |
| IDH21     | 6.91E-08 | 0.377590907 | 0.354 | 0.279 |
| MYO1E1    | 6.98E-08 | 0.287275664 | 0.546 | 0.5   |
| PSMA7     | 7.58E-08 | 0.306574317 | 0.846 | 0.882 |
| C5orf24   | 7.62E-08 | 0.302615565 | 0.444 | 0.396 |
| PABPC1    | 8.30E-08 | 0.268612637 | 0.852 | 0.894 |
| RASSF1    | 8.51E-08 | 0.365486811 | 0.387 | 0.32  |
| SLMAP     | 9.53E-08 | 0.474011376 | 0.51  | 0.491 |
| EHD1      | 9.98E-08 | 0.294333775 | 0.343 | 0.266 |
| CH25H     | 1.16E-07 | 0.349906498 | 0.141 | 0.255 |
| INAFM1    | 1.17E-07 | 0.355783159 | 0.461 | 0.405 |
| SLC7A5    | 1.19E-07 | 0.352764097 | 0.254 | 0.176 |

|           |          |             |       |       |
|-----------|----------|-------------|-------|-------|
| REEP31    | 1.29E-07 | 0.339727784 | 0.577 | 0.542 |
| HLA-B1    | 1.42E-07 | 0.406033762 | 0.936 | 0.945 |
| STK39     | 1.53E-07 | 0.449351808 | 0.384 | 0.324 |
| NDUFA2    | 1.55E-07 | 0.380724709 | 0.605 | 0.591 |
| C20orf27  | 1.60E-07 | 0.464358583 | 0.298 | 0.234 |
| EIF5B     | 1.65E-07 | 0.361540802 | 0.626 | 0.622 |
| HABP4     | 1.89E-07 | 0.307564298 | 0.326 | 0.259 |
| ARHGEF10L | 1.92E-07 | 0.346359185 | 0.305 | 0.238 |
| PHLDB2    | 1.93E-07 | 0.419288446 | 0.541 | 0.511 |
| EVA1C     | 2.04E-07 | 0.411972616 | 0.395 | 0.333 |
| PDCD10    | 2.48E-07 | 0.335590841 | 0.498 | 0.465 |
| MOB3B1    | 2.71E-07 | 0.297074339 | 0.393 | 0.31  |
| DYNLT1    | 3.07E-07 | 0.458579603 | 0.641 | 0.675 |
| OLA1      | 3.12E-07 | 0.320223469 | 0.467 | 0.434 |
| UBE2N     | 3.40E-07 | 0.388229389 | 0.534 | 0.512 |
| SEPTIN9   | 3.51E-07 | 0.346985315 | 0.462 | 0.419 |
| NUTF2     | 3.71E-07 | 0.282647646 | 0.405 | 0.355 |
| FKBP4     | 4.08E-07 | 0.260173085 | 0.321 | 0.246 |
| ATP5ME    | 4.15E-07 | 0.277445607 | 0.705 | 0.75  |
| VDAC2     | 4.19E-07 | 0.346163632 | 0.675 | 0.703 |
| ATP5F1E   | 4.26E-07 | 0.345509678 | 0.905 | 0.919 |
| BCL9L     | 4.30E-07 | 0.275774529 | 0.295 | 0.228 |
| PPDPF     | 4.34E-07 | 0.617593998 | 0.703 | 0.729 |
| HAPLN31   | 4.57E-07 | 0.274038443 | 0.302 | 0.229 |
| RHOQ      | 5.13E-07 | 0.360085191 | 0.651 | 0.671 |
| ARHGAP1   | 5.85E-07 | 0.336895252 | 0.438 | 0.387 |
| ZBTB161   | 5.90E-07 | 0.301548367 | 0.685 | 0.613 |
| ARHGAP261 | 5.98E-07 | 0.56790997  | 0.477 | 0.441 |
| C7orf50   | 6.51E-07 | 0.295849036 | 0.475 | 0.438 |
| TMEM1081  | 6.54E-07 | 0.426261905 | 0.274 | 0.198 |
| NCALD     | 7.14E-07 | 0.437559365 | 0.398 | 0.328 |
| H2AFJ     | 7.38E-07 | 0.365715329 | 0.689 | 0.72  |
| HNRNPM    | 7.66E-07 | 0.281346242 | 0.664 | 0.7   |
| DYNLT3    | 8.96E-07 | 0.278467558 | 0.477 | 0.444 |
| PTPRK     | 1.05E-06 | 0.421342363 | 0.651 | 0.651 |
| NME4      | 1.11E-06 | 0.295847503 | 0.549 | 0.527 |
| MICOS13   | 1.14E-06 | 0.374258053 | 0.638 | 0.644 |
| PCBP1     | 1.18E-06 | 0.285688704 | 0.672 | 0.706 |
| NDUFAF4   | 1.20E-06 | 0.276833413 | 0.279 | 0.207 |
| UQCRQ     | 1.26E-06 | 0.336190206 | 0.708 | 0.73  |
| HMG2      | 1.48E-06 | 0.349219084 | 0.736 | 0.771 |
| ATP5MC3   | 1.53E-06 | 0.316414434 | 0.748 | 0.785 |
| RWDD1     | 1.55E-06 | 0.272048493 | 0.716 | 0.72  |

|            |          |             |       |       |
|------------|----------|-------------|-------|-------|
| EGFL61     | 1.68E-06 | 0.643824545 | 0.295 | 0.222 |
| PJA2       | 1.70E-06 | 0.337007816 | 0.63  | 0.668 |
| SERPINB6   | 1.84E-06 | 0.297578582 | 0.605 | 0.606 |
| LDLRAD4    | 1.86E-06 | 0.431357466 | 0.449 | 0.385 |
| GADD45GIP1 | 1.90E-06 | 0.371137691 | 0.652 | 0.702 |
| CCNH       | 1.91E-06 | 0.679907647 | 0.639 | 0.667 |
| ANP32A     | 1.96E-06 | 0.29879218  | 0.462 | 0.439 |
| NDUFA5     | 2.06E-06 | 0.313341011 | 0.585 | 0.602 |
| ATP5PB     | 2.31E-06 | 0.305424743 | 0.603 | 0.61  |
| SRSF51     | 2.37E-06 | 0.274047872 | 0.787 | 0.844 |
| ST51       | 2.53E-06 | 0.426117657 | 0.477 | 0.444 |
| CLIC1      | 2.58E-06 | 0.329973385 | 0.825 | 0.846 |
| MRPS36     | 2.63E-06 | 0.375440183 | 0.492 | 0.456 |
| PNN        | 2.66E-06 | 0.340546731 | 0.587 | 0.597 |
| NT5DC1     | 2.67E-06 | 0.25145934  | 0.326 | 0.261 |
| MYL12A1    | 2.86E-06 | 0.432161928 | 0.815 | 0.85  |
| SRGN       | 2.96E-06 | 0.615375578 | 0.269 | 0.198 |
| ARHGEF9    | 2.97E-06 | 0.272085023 | 0.3   | 0.241 |
| SNTB11     | 3.11E-06 | 0.281937047 | 0.389 | 0.327 |
| KIRREL1    | 3.16E-06 | 0.344366472 | 0.418 | 0.38  |
| GADD45A    | 3.26E-06 | 0.391510465 | 0.495 | 0.448 |
| HRAS       | 3.46E-06 | 0.264268724 | 0.357 | 0.298 |
| ATP5PO     | 3.48E-06 | 0.258688967 | 0.738 | 0.773 |
| EMD        | 3.85E-06 | 0.308027632 | 0.39  | 0.344 |
| COX5A      | 3.95E-06 | 0.301417985 | 0.607 | 0.608 |
| ARPC3      | 4.10E-06 | 0.320050962 | 0.792 | 0.832 |
| SEM1       | 4.13E-06 | 0.294703051 | 0.728 | 0.791 |
| HLA-DRA    | 4.26E-06 | 0.253750853 | 0.21  | 0.329 |
| CHD1       | 4.46E-06 | 0.349732136 | 0.572 | 0.56  |
| CCDC102B   | 4.57E-06 | 1.067364644 | 0.285 | 0.233 |
| H2AFZ      | 5.85E-06 | 0.383943921 | 0.726 | 0.763 |
| MIF1       | 6.04E-06 | 0.628302708 | 0.916 | 0.917 |
| CYC1       | 6.47E-06 | 0.345391032 | 0.53  | 0.534 |
| CDKN1B     | 6.68E-06 | 0.262376046 | 0.361 | 0.31  |
| RAD23A     | 6.77E-06 | 0.35232935  | 0.593 | 0.628 |
| TOX2       | 7.15E-06 | 0.351297081 | 0.254 | 0.192 |
| NDUFB9     | 7.43E-06 | 0.297283136 | 0.628 | 0.65  |
| RAP2A      | 8.84E-06 | 0.297010419 | 0.354 | 0.308 |
| TNS2       | 1.06E-05 | 0.322414835 | 0.441 | 0.406 |
| CCT8       | 1.15E-05 | 0.316242471 | 0.554 | 0.566 |
| CREB3L2    | 1.23E-05 | 0.344206564 | 0.541 | 0.548 |
| NAP1L1     | 1.38E-05 | 0.292011814 | 0.833 | 0.862 |
| ESYT2      | 1.44E-05 | 0.505166103 | 0.687 | 0.737 |

|             |             |             |       |       |
|-------------|-------------|-------------|-------|-------|
| FAM50A      | 1.45E-05    | 0.279183202 | 0.518 | 0.499 |
| PSMD4       | 1.49E-05    | 0.312566512 | 0.58  | 0.597 |
| VAMP2       | 1.58E-05    | 0.291279773 | 0.559 | 0.579 |
| ATP5F1A     | 1.64E-05    | 0.307759117 | 0.618 | 0.663 |
| ABCA5       | 1.79E-05    | 0.258317765 | 0.32  | 0.264 |
| NAV2        | 1.88E-05    | 0.355685375 | 0.367 | 0.312 |
| ATP5IF1     | 2.01E-05    | 0.331145279 | 0.703 | 0.73  |
| YWHAH       | 2.20E-05    | 0.289468914 | 0.59  | 0.6   |
| RANBP2      | 2.32E-05    | 0.324140149 | 0.521 | 0.498 |
| SRRM1       | 2.43E-05    | 0.274087987 | 0.675 | 0.713 |
| IFITM3      | 2.44E-05    | 0.315125838 | 0.948 | 0.951 |
| KIF5B1      | 2.61E-05    | 0.289715138 | 0.675 | 0.703 |
| LGALS11     | 2.80E-05    | 0.322416239 | 0.944 | 0.969 |
| IQCJ-SCHIP1 | 2.84E-05    | 0.306388098 | 0.293 | 0.229 |
| ATPAF1      | 2.96E-05    | 0.257025703 | 0.282 | 0.231 |
| HNRNPH3     | 3.01E-05    | 0.283376543 | 0.638 | 0.677 |
| NDUFAB1     | 3.02E-05    | 0.265282202 | 0.618 | 0.668 |
| NDUFB1      | 3.03E-05    | 0.317241453 | 0.585 | 0.606 |
| POLR2K      | 3.15E-05    | 0.260234079 | 0.528 | 0.539 |
| OSMR        | 3.19E-05    | 0.423804127 | 0.52  | 0.515 |
| OSBPL5      | 3.24E-05    | 0.26662254  | 0.334 | 0.288 |
| SIVA1       | 3.83E-05    | 0.301551539 | 0.675 | 0.705 |
| XRCC5       | 4.73E-05    | 0.270824097 | 0.713 | 0.78  |
| UBE2M       | 4.80E-05    | 0.308132527 | 0.536 | 0.546 |
| ARHGAP101   | 5.87E-05    | 0.435545312 | 0.69  | 0.739 |
| PDK41       | 6.24E-05    | 0.637681739 | 0.475 | 0.415 |
| AP2M1       | 6.41E-05    | 0.334490121 | 0.687 | 0.747 |
| ACTR21      | 6.62E-05    | 0.272537136 | 0.639 | 0.668 |
| CALM3       | 6.98E-05    | 0.287152878 | 0.589 | 0.63  |
| NTN41       | 7.10E-05    | 0.275507921 | 0.413 | 0.365 |
| IQSEC1      | 7.57E-05    | 0.265045278 | 0.357 | 0.313 |
| BCAP29      | 7.86E-05    | 0.350489473 | 0.531 | 0.547 |
| CAPZA2      | 7.91E-05    | 0.267103685 | 0.62  | 0.65  |
| MGAT51      | 8.22E-05    | 0.255903274 | 0.418 | 0.372 |
| NFIL3       | 9.32E-05    | 0.474404368 | 0.528 | 0.532 |
| SH3KBP1     | 0.000104477 | 0.398056017 | 0.472 | 0.472 |
| PA2G4       | 0.000109357 | 0.261351462 | 0.593 | 0.645 |
| R3HCC1      | 0.000115969 | 0.251556725 | 0.321 | 0.275 |
| CTDSPL      | 0.000118326 | 0.347780318 | 0.505 | 0.507 |
| JADE11      | 0.000132014 | 0.274743884 | 0.408 | 0.36  |
| MIDN        | 0.000134624 | 0.309204896 | 0.474 | 0.453 |
| COPS6       | 0.000146122 | 0.282444533 | 0.595 | 0.624 |
| BANF1       | 0.000147068 | 0.305348259 | 0.641 | 0.664 |

|          |             |             |       |       |
|----------|-------------|-------------|-------|-------|
| ANGPTL1  | 0.000157192 | 0.60095103  | 0.351 | 0.324 |
| PDZD2    | 0.000158518 | 0.252654081 | 0.177 | 0.272 |
| DYNC1LI2 | 0.000162967 | 0.351700117 | 0.562 | 0.574 |
| SAP18    | 0.000172773 | 0.259064164 | 0.795 | 0.833 |
| LUC7L2   | 0.000175617 | 0.261559825 | 0.615 | 0.662 |
| CCT7     | 0.000200019 | 0.286343994 | 0.577 | 0.611 |
| FBXW5    | 0.000201752 | 0.298765074 | 0.456 | 0.441 |
| BAG1     | 0.00021104  | 0.304916929 | 0.518 | 0.528 |
| SPRY2    | 0.000211223 | 0.313553548 | 0.326 | 0.275 |
| SMG7     | 0.000216632 | 0.264969782 | 0.293 | 0.252 |
| PSMB6    | 0.000223371 | 0.285811898 | 0.674 | 0.731 |
| TIPARP   | 0.000234252 | 0.391110961 | 0.525 | 0.526 |
| ASAP11   | 0.000236111 | 0.563497914 | 0.626 | 0.668 |
| CDK2AP2  | 0.000237037 | 0.259127625 | 0.325 | 0.279 |
| NDUFS8   | 0.000242858 | 0.356943188 | 0.595 | 0.617 |
| UNC5C    | 0.000244474 | 0.445667514 | 0.395 | 0.367 |
| RNASEH2C | 0.00026376  | 0.305227844 | 0.584 | 0.603 |
| SLIRP    | 0.000303905 | 0.314520052 | 0.554 | 0.573 |
| NGRN     | 0.00032475  | 0.291264657 | 0.538 | 0.558 |
| DDT      | 0.000328472 | 0.305943882 | 0.584 | 0.589 |
| SEMA5A1  | 0.000333207 | 0.387599254 | 0.307 | 0.264 |
| SF1      | 0.00033922  | 0.289243882 | 0.587 | 0.61  |
| GPHN     | 0.000382669 | 0.325687425 | 0.552 | 0.576 |
| GADD45G  | 0.000441085 | 0.568018267 | 0.292 | 0.248 |
| MPDZ     | 0.000455042 | 0.262314653 | 0.436 | 0.422 |
| HK1      | 0.00045856  | 0.258601849 | 0.354 | 0.315 |
| ARL6IP4  | 0.000462029 | 0.253441179 | 0.761 | 0.8   |
| TPI11    | 0.000481282 | 0.310994791 | 0.818 | 0.847 |
| DYNLRB1  | 0.000485609 | 0.260995743 | 0.721 | 0.767 |
| MRPL20   | 0.00049437  | 0.277984183 | 0.659 | 0.697 |
| PHACTR2  | 0.00049449  | 0.261885304 | 0.593 | 0.622 |
| CNNM2    | 0.00050676  | 0.253966438 | 0.252 | 0.208 |
| ELL21    | 0.000511452 | 0.493115063 | 0.652 | 0.705 |
| METRN1   | 0.000521893 | 0.268953263 | 0.416 | 0.375 |
| MBNL1    | 0.000575786 | 0.271896911 | 0.774 | 0.854 |
| KNOP1    | 0.000577485 | 0.251408781 | 0.341 | 0.306 |
| UBE2W    | 0.000587476 | 0.25350692  | 0.367 | 0.331 |
| CHMP2A   | 0.000641031 | 0.2885807   | 0.674 | 0.723 |
| SORBS3   | 0.000648816 | 0.29737863  | 0.484 | 0.495 |
| GMDS     | 0.000650119 | 0.261072986 | 0.403 | 0.372 |
| NUDC     | 0.000684461 | 0.306238888 | 0.621 | 0.68  |
| RALGAPA1 | 0.000776832 | 0.290790018 | 0.577 | 0.604 |
| CYTOR1   | 0.000835164 | 0.50704113  | 0.552 | 0.581 |

|              |             |             |       |       |
|--------------|-------------|-------------|-------|-------|
| TAF7         | 0.00083968  | 0.28982879  | 0.533 | 0.555 |
| PIN1         | 0.000842788 | 0.304129861 | 0.52  | 0.546 |
| ZNF580       | 0.000949073 | 0.290316286 | 0.334 | 0.305 |
| IMMT         | 0.001036441 | 0.256194504 | 0.341 | 0.319 |
| ZC3H13       | 0.00111334  | 0.380720422 | 0.566 | 0.585 |
| AIG1         | 0.001134578 | 0.28233887  | 0.516 | 0.512 |
| ARL3         | 0.001180966 | 0.320903727 | 0.515 | 0.529 |
| TMEM204      | 0.00123101  | 0.308049801 | 0.357 | 0.327 |
| AURKAIP1     | 0.001288048 | 0.271931308 | 0.616 | 0.662 |
| RBM3         | 0.001412247 | 0.259199348 | 0.733 | 0.779 |
| PXDN1        | 0.00154956  | 0.270076029 | 0.382 | 0.345 |
| FRYL1        | 0.001636405 | 0.280760081 | 0.505 | 0.514 |
| UBR1         | 0.001695192 | 0.616985578 | 0.51  | 0.531 |
| NAA10        | 0.001703455 | 0.267238145 | 0.436 | 0.426 |
| SCLT11       | 0.001796461 | 0.319967318 | 0.403 | 0.386 |
| PRR161       | 0.001815156 | 0.362426047 | 0.398 | 0.369 |
| DDX21        | 0.001891345 | 0.272850243 | 0.58  | 0.609 |
| IMMP2L1      | 0.001976936 | 0.625105521 | 0.616 | 0.661 |
| NR1H2        | 0.002137589 | 0.259082937 | 0.416 | 0.409 |
| SLC20A2      | 0.00214414  | 0.288352757 | 0.397 | 0.374 |
| MRGPRF       | 0.002164756 | 0.359409246 | 0.392 | 0.396 |
| UGCG1        | 0.00225952  | 0.32976969  | 0.536 | 0.559 |
| CDC73        | 0.002452833 | 0.276663029 | 0.498 | 0.505 |
| PSMC3        | 0.002580126 | 0.255590441 | 0.562 | 0.594 |
| POLR2I       | 0.002700597 | 0.34725838  | 0.508 | 0.527 |
| CCDC124      | 0.002944721 | 0.302766237 | 0.459 | 0.474 |
| C1orf54      | 0.00313364  | 0.265529678 | 0.449 | 0.467 |
| PLEC1        | 0.003326182 | 0.346449644 | 0.489 | 0.511 |
| HIST1H1C     | 0.003356913 | 0.34072044  | 0.293 | 0.269 |
| MAGED2       | 0.003387125 | 0.284119209 | 0.63  | 0.68  |
| PDE8A        | 0.003526839 | 0.36403086  | 0.454 | 0.452 |
| VDAC1        | 0.003665716 | 0.270271579 | 0.6   | 0.625 |
| PSMB3        | 0.00388188  | 0.276853363 | 0.679 | 0.721 |
| MLF2         | 0.003967173 | 0.262165417 | 0.569 | 0.588 |
| PVT1         | 0.004361881 | 0.282292742 | 0.305 | 0.269 |
| SPECC1L      | 0.004592276 | 0.280102958 | 0.456 | 0.457 |
| ASPN         | 0.004706378 | 0.344833491 | 0.338 | 0.296 |
| MIR4435-2HG1 | 0.005048666 | 0.417660145 | 0.52  | 0.546 |
| PRXL2C       | 0.005092542 | 0.27237107  | 0.375 | 0.366 |
| ARGLU1       | 0.005473189 | 0.298443075 | 0.628 | 0.69  |
| SRSF7        | 0.00557922  | 0.272536987 | 0.734 | 0.812 |
| PGAP1        | 0.005838211 | 0.370088168 | 0.262 | 0.233 |
| RB1          | 0.005973766 | 0.670584159 | 0.444 | 0.452 |

|           |             |             |       |       |
|-----------|-------------|-------------|-------|-------|
| ZBTB10    | 0.006012732 | 0.283921015 | 0.318 | 0.298 |
| RTRAF     | 0.006485551 | 0.307409619 | 0.672 | 0.715 |
| PRXL2A    | 0.006518846 | 0.341445938 | 0.272 | 0.246 |
| CDC5L     | 0.006678926 | 0.309057304 | 0.518 | 0.547 |
| RHOC1     | 0.006938684 | 0.273154252 | 0.707 | 0.751 |
| CEP85L    | 0.007068873 | 0.275535396 | 0.4   | 0.388 |
| MDM4      | 0.007942118 | 0.251407864 | 0.384 | 0.374 |
| NME2      | 0.008292228 | 0.255095362 | 0.915 | 0.928 |
| DDX6      | 0.009579548 | 0.255231796 | 0.461 | 0.474 |
| ID11      | 0.009765883 | 0.506933632 | 0.387 | 0.376 |
| ILF3-DT   | 0.009889332 | 0.254353111 | 0.274 | 0.252 |
| IGFBP61   | 2.48E-130   | 1.923216799 | 0.96  | 0.73  |
| PLAC91    | 3.34E-130   | 1.199517263 | 0.984 | 0.694 |
| DCN1      | 6.73E-123   | 1.328367177 | 1     | 0.916 |
| FBLN11    | 1.16E-122   | 1.320196242 | 0.993 | 0.784 |
| ITM2A1    | 2.22E-121   | 1.251766596 | 0.894 | 0.416 |
| SERPING11 | 4.09E-120   | 1.028522214 | 0.984 | 0.872 |
| SERPINF11 | 8.27E-119   | 1.073490282 | 0.982 | 0.788 |
| CD811     | 2.13E-117   | 1.004442417 | 0.989 | 0.911 |
| PI161     | 7.56E-117   | 1.486371071 | 0.801 | 0.318 |
| CD341     | 3.80E-114   | 0.894377578 | 0.809 | 0.326 |
| CLU1      | 6.16E-114   | 1.417710772 | 0.951 | 0.626 |
| CFD1      | 5.27E-113   | 1.739828679 | 0.904 | 0.508 |
| ITM2B1    | 1.03E-110   | 0.743806022 | 0.987 | 0.923 |
| PCOLCE21  | 1.79E-107   | 1.488000294 | 0.753 | 0.304 |
| MFAP51    | 5.97E-107   | 1.462346718 | 0.931 | 0.592 |
| TNXB1     | 1.90E-106   | 1.157324188 | 0.94  | 0.46  |
| MFAP41    | 2.53E-106   | 1.588029921 | 0.949 | 0.709 |
| OGN1      | 2.32E-100   | 1.059173755 | 0.922 | 0.46  |
| EFEMP11   | 1.01E-98    | 1.000240209 | 0.949 | 0.554 |
| LTBP41    | 1.05E-98    | 1.099224363 | 0.931 | 0.639 |
| CLEC3B1   | 1.50E-97    | 1.272415752 | 0.634 | 0.225 |
| MGP1      | 1.12E-94    | 1.11204825  | 0.991 | 0.78  |
| FCGRT1    | 1.08E-93    | 1.026750269 | 0.944 | 0.726 |
| PLTP1     | 2.15E-93    | 1.342505705 | 0.906 | 0.62  |
| S100A10   | 4.37E-93    | 0.997557799 | 0.993 | 0.851 |
| MGST11    | 1.65E-92    | 1.020209671 | 0.883 | 0.455 |
| CADM31    | 6.20E-90    | 1.075403312 | 0.592 | 0.209 |
| C1S1      | 2.25E-88    | 0.821530999 | 0.993 | 0.85  |
| PSAP1     | 5.66E-88    | 0.855380603 | 0.973 | 0.87  |
| CILP1     | 6.14E-86    | 1.116356969 | 0.727 | 0.339 |
| LSP11     | 1.22E-85    | 0.876770171 | 0.774 | 0.406 |
| FBLN21    | 1.33E-85    | 1.160722136 | 0.913 | 0.665 |

|           |          |             |       |       |
|-----------|----------|-------------|-------|-------|
| SOD31     | 5.13E-85 | 1.195308693 | 0.953 | 0.661 |
| PRELP1    | 9.39E-85 | 1.087639214 | 0.852 | 0.503 |
| C1QTNF31  | 3.08E-84 | 0.938717512 | 0.814 | 0.417 |
| LGALS3BP1 | 1.63E-83 | 0.791858031 | 0.957 | 0.801 |
| SERPINA31 | 2.69E-83 | 1.199817662 | 0.744 | 0.339 |
| SCARA51   | 1.01E-82 | 0.962542492 | 0.782 | 0.358 |
| RNASE41   | 2.25E-82 | 1.029065076 | 0.85  | 0.542 |
| ANXA11    | 4.78E-82 | 0.88659744  | 0.969 | 0.863 |
| ANXA2     | 6.87E-78 | 0.732666712 | 0.987 | 0.905 |
| SLPI1     | 4.53E-77 | 1.472466183 | 0.657 | 0.297 |
| C31       | 1.02E-76 | 0.895457288 | 0.978 | 0.611 |
| CXCL121   | 2.14E-75 | 0.862973614 | 0.881 | 0.495 |
| CCDC801   | 2.30E-75 | 0.936872942 | 0.993 | 0.836 |
| PMP221    | 4.50E-75 | 0.721498136 | 0.948 | 0.802 |
| PODN1     | 2.41E-74 | 0.88133678  | 0.895 | 0.558 |
| OLFML31   | 6.31E-74 | 0.917676244 | 0.877 | 0.595 |
| LAPTM4A1  | 7.08E-74 | 0.638816495 | 0.964 | 0.875 |
| FXYD11    | 2.34E-73 | 0.90135213  | 0.854 | 0.538 |
| DDAH21    | 3.13E-72 | 0.721099419 | 0.884 | 0.675 |
| OMD1      | 3.21E-72 | 0.713314464 | 0.776 | 0.408 |
| PHGDH1    | 6.39E-72 | 0.859822798 | 0.614 | 0.289 |
| CCN51     | 1.19E-70 | 1.229159115 | 0.69  | 0.324 |
| NPC21     | 1.78E-70 | 0.7555026   | 0.928 | 0.75  |
| GPNMB1    | 1.87E-70 | 0.89861529  | 0.924 | 0.704 |
| CHRD11    | 2.36E-70 | 0.70561567  | 0.702 | 0.306 |
| SELENOP1  | 1.38E-69 | 0.829172977 | 0.89  | 0.57  |
| ADH1B1    | 9.92E-69 | 1.16970558  | 0.773 | 0.39  |
| PLA2G2A1  | 4.27E-67 | 1.360544935 | 0.751 | 0.363 |
| OAF1      | 2.22E-66 | 0.783888971 | 0.792 | 0.512 |
| RAMP21    | 3.40E-64 | 0.812030891 | 0.5   | 0.193 |
| P2RX21    | 4.74E-64 | 0.691600929 | 0.39  | 0.119 |
| TIMP1     | 4.88E-64 | 0.791235988 | 0.998 | 0.922 |
| TXNIP1    | 1.45E-63 | 0.916298247 | 0.946 | 0.772 |
| S100A131  | 5.13E-63 | 0.685608634 | 0.94  | 0.748 |
| DPT1      | 2.30E-62 | 1.091082    | 0.83  | 0.517 |
| LGALS31   | 4.82E-62 | 0.665922355 | 0.971 | 0.871 |
| CTSF1     | 7.58E-62 | 0.786593103 | 0.81  | 0.541 |
| KLF41     | 1.27E-61 | 1.028749172 | 0.843 | 0.556 |
| C17orf581 | 4.28E-61 | 0.764241855 | 0.538 | 0.239 |
| VSIR1     | 6.52E-61 | 0.733574611 | 0.652 | 0.345 |
| RNH1      | 1.06E-60 | 0.657504218 | 0.901 | 0.776 |
| CD99      | 1.56E-60 | 0.562950531 | 0.966 | 0.898 |
| PLBD11    | 4.17E-60 | 0.641202084 | 0.626 | 0.312 |



|            |          |             |       |       |
|------------|----------|-------------|-------|-------|
| PTGIS1     | 2.60E-59 | 0.561056231 | 0.697 | 0.328 |
| SCPEP11    | 2.64E-59 | 0.670421586 | 0.856 | 0.573 |
| EPHX11     | 3.12E-58 | 0.748691181 | 0.778 | 0.52  |
| PTGES1     | 4.46E-58 | 0.586501885 | 0.514 | 0.218 |
| GPX31      | 8.95E-58 | 1.212763366 | 0.745 | 0.479 |
| GPX4       | 1.11E-57 | 0.679300534 | 0.937 | 0.84  |
| TMEM59     | 1.20E-57 | 0.581849964 | 0.951 | 0.832 |
| ZFP36L21   | 1.27E-56 | 0.747905757 | 0.968 | 0.797 |
| AKR1C11    | 1.88E-56 | 0.596497377 | 0.778 | 0.437 |
| ALDH21     | 1.14E-55 | 0.645808961 | 0.787 | 0.483 |
| ANXA4      | 1.38E-55 | 0.63609867  | 0.832 | 0.63  |
| CYBRD11    | 3.90E-55 | 0.698891995 | 0.892 | 0.631 |
| NPDC11     | 8.14E-55 | 0.58124845  | 0.679 | 0.396 |
| ALDH1A11   | 3.40E-54 | 0.652541991 | 0.681 | 0.351 |
| FEZ11      | 6.36E-54 | 0.685905136 | 0.765 | 0.5   |
| CPVL1      | 1.04E-53 | 0.617153953 | 0.5   | 0.207 |
| ADAMTSL41  | 1.36E-53 | 0.634342705 | 0.57  | 0.276 |
| DUSP11     | 1.57E-53 | 0.83254227  | 0.973 | 0.869 |
| ACKR31     | 2.54E-53 | 1.143590413 | 0.704 | 0.45  |
| ARL6IP51   | 3.64E-53 | 0.567656947 | 0.937 | 0.797 |
| NPR11      | 2.91E-52 | 0.456315337 | 0.394 | 0.139 |
| SRPX1      | 3.71E-52 | 0.925246443 | 0.765 | 0.498 |
| LRRN4CL1   | 3.99E-52 | 0.618958809 | 0.708 | 0.421 |
| AKR1C21    | 5.72E-52 | 0.649010464 | 0.581 | 0.281 |
| LINC011331 | 5.77E-52 | 0.571111016 | 0.471 | 0.193 |
| SEMA3C1    | 6.27E-52 | 0.673868473 | 0.798 | 0.491 |
| PLD31      | 8.27E-52 | 0.689703509 | 0.872 | 0.69  |
| CYP4B11    | 9.58E-52 | 0.765798724 | 0.421 | 0.154 |
| S100A6     | 1.51E-51 | 0.583570542 | 0.993 | 0.96  |
| HIGD1A1    | 2.05E-51 | 0.667082883 | 0.727 | 0.496 |
| F101       | 2.78E-51 | 1.027944827 | 0.641 | 0.382 |
| REXO21     | 1.28E-50 | 0.68258031  | 0.894 | 0.744 |
| PRDX1      | 2.22E-50 | 0.470282261 | 0.964 | 0.864 |
| CD91       | 5.10E-50 | 0.62598592  | 0.892 | 0.648 |
| FHL11      | 1.43E-49 | 0.66985716  | 0.861 | 0.599 |
| MYOC1      | 1.51E-49 | 1.292646075 | 0.455 | 0.18  |
| KLF2       | 4.53E-49 | 0.977799619 | 0.85  | 0.671 |
| SFRP21     | 4.76E-49 | 0.829473368 | 0.944 | 0.746 |
| ZNF385A1   | 6.49E-49 | 0.638940294 | 0.538 | 0.271 |
| PIGT       | 1.44E-48 | 0.669992865 | 0.767 | 0.581 |
| EEF1A1     | 1.63E-48 | 0.430692595 | 1     | 0.989 |
| NENF       | 2.87E-48 | 0.535209011 | 0.883 | 0.746 |
| ABHD14A1   | 3.21E-48 | 0.548298467 | 0.554 | 0.292 |

|            |          |             |       |       |
|------------|----------|-------------|-------|-------|
| TMBIM41    | 3.95E-48 | 0.531365868 | 0.91  | 0.764 |
| UAP11      | 1.39E-47 | 0.602561411 | 0.89  | 0.654 |
| EMP3       | 2.41E-47 | 0.657028444 | 0.944 | 0.79  |
| VAT11      | 2.95E-47 | 0.626938544 | 0.724 | 0.489 |
| NUPR11     | 2.98E-47 | 0.583938098 | 0.94  | 0.817 |
| EIF1       | 4.55E-47 | 0.432734006 | 0.989 | 0.967 |
| AKR1C31    | 1.09E-46 | 0.549342314 | 0.608 | 0.325 |
| GNG111     | 1.46E-46 | 0.594403809 | 0.85  | 0.644 |
| TSPAN41    | 1.66E-46 | 0.518807827 | 0.874 | 0.675 |
| SMIM141    | 2.90E-46 | 0.535768485 | 0.834 | 0.598 |
| TAGLN2     | 3.78E-46 | 0.593276691 | 0.946 | 0.844 |
| GRN        | 5.78E-46 | 0.632379475 | 0.872 | 0.719 |
| GSTM51     | 8.06E-46 | 0.713911212 | 0.509 | 0.252 |
| S100A4     | 1.10E-45 | 0.671635853 | 0.978 | 0.913 |
| DBN1       | 2.97E-45 | 0.607249225 | 0.626 | 0.389 |
| BST11      | 5.12E-45 | 0.503796353 | 0.466 | 0.211 |
| SFRP11     | 7.04E-45 | 0.684520765 | 0.634 | 0.308 |
| ABI3BP1    | 2.11E-44 | 0.414387108 | 0.912 | 0.494 |
| SH3BGRL3   | 3.11E-44 | 0.722323138 | 0.953 | 0.829 |
| ATRAID     | 3.82E-44 | 0.514262544 | 0.877 | 0.725 |
| CTSH1      | 4.19E-44 | 0.602161727 | 0.661 | 0.402 |
| ELN1       | 4.58E-44 | 0.61542033  | 0.839 | 0.513 |
| PROCR1     | 7.80E-44 | 0.733365391 | 0.578 | 0.318 |
| CYP1B11    | 8.20E-44 | 0.598295663 | 0.592 | 0.289 |
| GYPC       | 1.15E-43 | 0.575093667 | 0.819 | 0.674 |
| CYB5A1     | 1.41E-43 | 0.634604666 | 0.812 | 0.622 |
| TMEM109    | 3.17E-43 | 0.540263177 | 0.724 | 0.497 |
| CTSD       | 4.75E-43 | 0.478357181 | 0.899 | 0.773 |
| TPPP3      | 2.83E-42 | 0.870218982 | 0.556 | 0.294 |
| CPQ1       | 3.44E-42 | 0.532501049 | 0.895 | 0.745 |
| IL181      | 6.25E-42 | 0.469932308 | 0.444 | 0.186 |
| IFIT11     | 1.89E-41 | 0.401734064 | 0.545 | 0.276 |
| ABLIM11    | 3.66E-41 | 0.390512852 | 0.819 | 0.46  |
| OSR11      | 5.09E-41 | 0.422662914 | 0.428 | 0.185 |
| ITGBL11    | 1.34E-40 | 0.607174895 | 0.789 | 0.53  |
| TRIOBP1    | 2.70E-40 | 0.554817495 | 0.715 | 0.475 |
| TIMP31     | 4.53E-40 | 0.634261349 | 0.982 | 0.869 |
| ABCA81     | 5.39E-40 | 0.46260397  | 0.787 | 0.421 |
| PDGFRL     | 8.94E-40 | 0.618658297 | 0.652 | 0.398 |
| LINC028021 | 2.84E-39 | 0.502440339 | 0.704 | 0.475 |
| LTBP31     | 3.80E-39 | 0.544387601 | 0.787 | 0.574 |
| TSC22D31   | 4.44E-39 | 0.662631408 | 0.908 | 0.783 |
| SEMA3B1    | 7.70E-39 | 0.55503298  | 0.44  | 0.21  |

|           |          |             |       |       |
|-----------|----------|-------------|-------|-------|
| TGFBR31   | 9.33E-39 | 0.34616735  | 0.875 | 0.526 |
| BTF3      | 4.63E-38 | 0.362447821 | 0.962 | 0.887 |
| HSD3B7    | 8.54E-38 | 0.599552747 | 0.484 | 0.257 |
| VEGFD1    | 9.77E-38 | 0.471941711 | 0.388 | 0.162 |
| FAIM21    | 9.88E-38 | 0.407368543 | 0.309 | 0.112 |
| CD63      | 3.92E-37 | 0.358557847 | 0.996 | 0.955 |
| FGL21     | 5.20E-37 | 0.554443639 | 0.502 | 0.256 |
| VEGFB     | 5.37E-37 | 0.583572291 | 0.818 | 0.664 |
| SERPINE21 | 1.16E-36 | 0.5391301   | 0.785 | 0.518 |
| CREG11    | 1.65E-36 | 0.488874266 | 0.76  | 0.546 |
| SSC5D1    | 2.02E-36 | 0.484575853 | 0.583 | 0.362 |
| LRP11     | 2.21E-36 | 0.505776527 | 0.937 | 0.744 |
| GSTM31    | 3.10E-36 | 0.485532347 | 0.798 | 0.622 |
| DHRS31    | 3.53E-36 | 0.47209157  | 0.616 | 0.368 |
| SGCG1     | 4.25E-36 | 0.326727014 | 0.365 | 0.147 |
| BLVRB1    | 5.22E-36 | 0.484823545 | 0.765 | 0.588 |
| OS9       | 8.73E-36 | 0.490507435 | 0.829 | 0.664 |
| CFH1      | 1.13E-35 | 0.422779722 | 0.957 | 0.772 |
| LRPAP1    | 1.24E-35 | 0.432664699 | 0.85  | 0.712 |
| GABARAPL2 | 1.59E-35 | 0.417100415 | 0.861 | 0.709 |
| BDH21     | 1.76E-35 | 0.495331615 | 0.731 | 0.535 |
| CSTB      | 2.12E-35 | 0.304988805 | 0.883 | 0.759 |
| PALM1     | 3.68E-35 | 0.441793704 | 0.525 | 0.293 |
| ESD       | 3.71E-35 | 0.416374469 | 0.836 | 0.688 |
| TMEM176B1 | 4.12E-35 | 0.506321721 | 0.884 | 0.674 |
| CD2481    | 4.25E-35 | 0.5606861   | 0.756 | 0.543 |
| GSTP1     | 4.79E-35 | 0.314573487 | 0.98  | 0.904 |
| RARRES11  | 6.65E-35 | 0.733614537 | 0.736 | 0.482 |
| FKBP8     | 2.41E-34 | 0.429994779 | 0.843 | 0.716 |
| ROBO31    | 3.28E-34 | 0.466458452 | 0.41  | 0.197 |
| MATN21    | 3.39E-34 | 0.396625528 | 0.426 | 0.197 |
| PLAAT41   | 6.64E-34 | 0.430635597 | 0.711 | 0.466 |
| BMP41     | 1.06E-33 | 0.591394787 | 0.601 | 0.377 |
| CDKN2C1   | 1.79E-33 | 0.433248989 | 0.525 | 0.302 |
| ECM1      | 1.97E-33 | 0.465077205 | 0.852 | 0.669 |
| CFB1      | 2.09E-33 | 0.591168289 | 0.657 | 0.415 |
| LAMP1     | 2.22E-33 | 0.425499096 | 0.856 | 0.732 |
| TMEM35B1  | 2.61E-33 | 0.474076226 | 0.72  | 0.521 |
| CD551     | 2.70E-33 | 0.670939269 | 0.814 | 0.646 |
| OSR21     | 3.37E-33 | 0.574460167 | 0.605 | 0.375 |
| FTL       | 4.09E-33 | 0.372320421 | 0.998 | 0.984 |
| QSOX11    | 5.03E-33 | 0.571377945 | 0.762 | 0.558 |
| PEBP1     | 5.05E-33 | 0.37378009  | 0.944 | 0.843 |

|          |          |             |       |       |
|----------|----------|-------------|-------|-------|
| TOMM7    | 7.82E-33 | 0.324564976 | 0.944 | 0.865 |
| MXRA81   | 1.46E-32 | 0.462387502 | 0.895 | 0.718 |
| HLA-E    | 4.10E-32 | 0.413730723 | 0.939 | 0.853 |
| ANG1     | 5.14E-32 | 0.472616526 | 0.495 | 0.284 |
| SGCE1    | 7.16E-32 | 0.469266719 | 0.684 | 0.495 |
| TCF211   | 8.10E-32 | 0.509053628 | 0.722 | 0.492 |
| SSPN1    | 1.04E-31 | 0.489808938 | 0.821 | 0.659 |
| TFPI1    | 1.35E-31 | 0.402992136 | 0.903 | 0.63  |
| CYP27A11 | 1.36E-31 | 0.411158627 | 0.505 | 0.282 |
| SDCBP1   | 1.47E-31 | 0.421866269 | 0.875 | 0.756 |
| IGFBP41  | 1.51E-31 | 0.653930756 | 0.984 | 0.885 |
| HSD11B1  | 1.88E-31 | 0.400534186 | 0.37  | 0.169 |
| SLC29A1  | 2.42E-31 | 0.381654183 | 0.383 | 0.183 |
| ADI1     | 4.64E-31 | 0.478151741 | 0.767 | 0.612 |
| ADD31    | 5.47E-31 | 0.40895127  | 0.877 | 0.657 |
| REX1BD   | 7.43E-31 | 0.372345664 | 0.819 | 0.654 |
| CBR31    | 9.81E-31 | 0.378950174 | 0.56  | 0.333 |
| COL14A11 | 1.45E-30 | 0.394166874 | 0.939 | 0.668 |
| GAS11    | 1.54E-30 | 0.734112349 | 0.699 | 0.497 |
| SOD1     | 1.69E-30 | 0.362342261 | 0.93  | 0.833 |
| HEXB     | 1.86E-30 | 0.5415286   | 0.724 | 0.562 |
| SH3BP51  | 1.94E-30 | 0.377279855 | 0.789 | 0.593 |
| RTN41    | 2.00E-30 | 0.320567537 | 0.966 | 0.875 |
| ADAM331  | 2.77E-30 | 0.407064308 | 0.523 | 0.296 |
| PLP2     | 2.97E-30 | 0.461875338 | 0.765 | 0.584 |
| FKBP1A   | 3.62E-30 | 0.402551965 | 0.832 | 0.699 |
| LEPR1    | 3.96E-30 | 0.378558251 | 0.601 | 0.35  |
| CLTB     | 4.82E-30 | 0.470576468 | 0.819 | 0.683 |
| EID1     | 5.31E-30 | 0.332287446 | 0.964 | 0.898 |
| RACK1    | 6.42E-30 | 0.286931473 | 0.987 | 0.945 |
| CNBP     | 7.85E-30 | 0.344965932 | 0.906 | 0.798 |
| GALNT151 | 8.58E-30 | 0.608602408 | 0.596 | 0.373 |
| ABCA61   | 1.02E-29 | 0.337599508 | 0.791 | 0.468 |
| CALHM2   | 1.11E-29 | 0.365091669 | 0.486 | 0.29  |
| BCHE1    | 1.19E-29 | 0.426745099 | 0.332 | 0.144 |
| LRP10    | 1.21E-29 | 0.438652077 | 0.751 | 0.582 |
| WIF11    | 1.25E-29 | 0.845095479 | 0.273 | 0.101 |
| NOP53    | 1.40E-29 | 0.379054452 | 0.899 | 0.799 |
| AOX11    | 2.52E-29 | 0.38735908  | 0.601 | 0.333 |
| NOVA11   | 3.71E-29 | 0.371625845 | 0.682 | 0.414 |
| SELENBP1 | 7.16E-29 | 0.459725974 | 0.581 | 0.382 |
| LY6E     | 7.26E-29 | 0.418938374 | 0.93  | 0.775 |
| TNFSF101 | 8.92E-29 | 0.368844211 | 0.727 | 0.484 |

|           |          |             |       |       |
|-----------|----------|-------------|-------|-------|
| ANXA5     | 9.13E-29 | 0.405633279 | 0.966 | 0.89  |
| TNFSF12   | 9.31E-29 | 0.35976155  | 0.614 | 0.415 |
| PCOLCE1   | 9.87E-29 | 0.474385124 | 0.957 | 0.836 |
| PRNP1     | 1.64E-28 | 0.377207613 | 0.794 | 0.611 |
| MYL12B    | 2.25E-28 | 0.31310953  | 0.955 | 0.88  |
| OAZ1      | 2.39E-28 | 0.287344197 | 0.968 | 0.902 |
| CIRBP     | 2.91E-28 | 0.373899664 | 0.919 | 0.825 |
| IL17D     | 3.10E-28 | 0.340560973 | 0.338 | 0.158 |
| CCDC51    | 3.16E-28 | 0.33548177  | 0.368 | 0.179 |
| VKORC1    | 3.22E-28 | 0.377733939 | 0.904 | 0.767 |
| TMEM106C  | 4.94E-28 | 0.353373253 | 0.496 | 0.3   |
| TRIP10    | 7.24E-28 | 0.370797603 | 0.572 | 0.383 |
| ADH51     | 1.65E-27 | 0.47578073  | 0.834 | 0.71  |
| METRNL    | 1.80E-27 | 0.564067654 | 0.639 | 0.481 |
| LUM1      | 1.83E-27 | 0.47838244  | 0.995 | 0.814 |
| UCHL11    | 5.00E-27 | 0.612814443 | 0.495 | 0.309 |
| CITED21   | 5.43E-27 | 0.648749126 | 0.671 | 0.497 |
| CD14      | 7.34E-27 | 0.262402855 | 0.253 | 0.097 |
| GUSB      | 9.56E-27 | 0.410135183 | 0.567 | 0.38  |
| SRI       | 1.30E-26 | 0.332628361 | 0.818 | 0.679 |
| MAPK3     | 1.54E-26 | 0.33699837  | 0.547 | 0.359 |
| FNDC5     | 1.87E-26 | 0.310181746 | 0.255 | 0.099 |
| EIF3F     | 2.56E-26 | 0.342230266 | 0.854 | 0.764 |
| CREB51    | 2.81E-26 | 0.283205069 | 0.742 | 0.48  |
| CD70      | 3.17E-26 | 0.318114274 | 0.283 | 0.12  |
| VIT1      | 3.27E-26 | 0.339252989 | 0.44  | 0.226 |
| METTL7A1  | 3.49E-26 | 0.367216438 | 0.699 | 0.444 |
| OLFML11   | 3.72E-26 | 0.446113813 | 0.579 | 0.396 |
| TMEM176A1 | 4.22E-26 | 0.447900958 | 0.818 | 0.607 |
| ACKR41    | 4.93E-26 | 0.343434887 | 0.339 | 0.161 |
| SULT1A11  | 7.40E-26 | 0.366918458 | 0.375 | 0.189 |
| HTRA3     | 8.48E-26 | 0.748799465 | 0.659 | 0.465 |
| FIBIN1    | 1.06E-25 | 0.536876572 | 0.646 | 0.466 |
| GATD3B    | 1.34E-25 | 0.293032372 | 0.39  | 0.205 |
| COL6A21   | 1.51E-25 | 0.274376431 | 0.991 | 0.913 |
| PLEKHF1   | 1.52E-25 | 0.384645816 | 0.439 | 0.257 |
| IGSF8     | 1.80E-25 | 0.306712346 | 0.401 | 0.221 |
| TXN       | 2.21E-25 | 0.428033228 | 0.937 | 0.841 |
| SMDT1     | 2.64E-25 | 0.330850844 | 0.747 | 0.6   |
| CRYL1     | 3.24E-25 | 0.337114914 | 0.458 | 0.273 |
| RTN3      | 3.87E-25 | 0.359079667 | 0.792 | 0.627 |
| CLIC3     | 6.59E-25 | 0.324703033 | 0.283 | 0.126 |
| MYC1      | 6.93E-25 | 0.674988305 | 0.603 | 0.429 |

|           |          |             |       |       |
|-----------|----------|-------------|-------|-------|
| TUBA1B    | 7.67E-25 | 0.306517777 | 0.939 | 0.871 |
| GABARAP   | 9.36E-25 | 0.281942893 | 0.966 | 0.886 |
| TMEM98    | 9.57E-25 | 0.386618625 | 0.722 | 0.561 |
| IGF11     | 1.26E-24 | 0.587504488 | 0.673 | 0.427 |
| DDIT4     | 3.45E-24 | 0.550368764 | 0.736 | 0.577 |
| MEDAG1    | 3.72E-24 | 0.363787415 | 0.579 | 0.359 |
| PRCP      | 3.77E-24 | 0.405067073 | 0.587 | 0.426 |
| MTCH1     | 3.92E-24 | 0.349357962 | 0.838 | 0.73  |
| MMP23B    | 4.67E-24 | 0.475854105 | 0.726 | 0.532 |
| PAMR11    | 9.08E-24 | 0.394945582 | 0.504 | 0.297 |
| FSTL11    | 9.50E-24 | 0.508974736 | 0.962 | 0.829 |
| LMAN2     | 9.89E-24 | 0.334524261 | 0.774 | 0.649 |
| ANKRD35   | 1.04E-23 | 0.351709755 | 0.486 | 0.305 |
| CPE2      | 1.55E-23 | 0.702694668 | 0.742 | 0.607 |
| THYN1     | 1.57E-23 | 0.334307035 | 0.538 | 0.367 |
| SVBP      | 1.62E-23 | 0.386486331 | 0.527 | 0.365 |
| EIF3E     | 1.64E-23 | 0.253062856 | 0.924 | 0.837 |
| ERP29     | 1.74E-23 | 0.312874001 | 0.812 | 0.672 |
| CKS1B     | 2.71E-23 | 0.286801916 | 0.473 | 0.297 |
| GLUL1     | 3.52E-23 | 0.433583442 | 0.877 | 0.729 |
| SHISA31   | 6.61E-23 | 0.391299922 | 0.323 | 0.155 |
| VAMP5     | 1.18E-22 | 0.303405644 | 0.818 | 0.648 |
| TMSB4X1   | 1.23E-22 | 0.264157658 | 0.996 | 0.984 |
| BIN1      | 2.32E-22 | 0.319685    | 0.534 | 0.367 |
| ATP6V0E1  | 2.37E-22 | 0.260002733 | 0.939 | 0.846 |
| YPEL3     | 2.43E-22 | 0.378252008 | 0.668 | 0.535 |
| IFNGR2    | 2.50E-22 | 0.338070564 | 0.594 | 0.415 |
| PPA1      | 2.57E-22 | 0.318965256 | 0.801 | 0.68  |
| DNASE2    | 4.62E-22 | 0.318325161 | 0.527 | 0.359 |
| C16orf891 | 4.67E-22 | 0.436010222 | 0.319 | 0.157 |
| MFGE81    | 6.26E-22 | 0.337254759 | 0.888 | 0.793 |
| SNHG29    | 6.29E-22 | 0.334978062 | 0.937 | 0.876 |
| CMBL      | 8.03E-22 | 0.315758721 | 0.417 | 0.25  |
| ACVRL11   | 8.96E-22 | 0.355825025 | 0.536 | 0.351 |
| ISCU      | 1.06E-21 | 0.285853891 | 0.838 | 0.698 |
| CHID1     | 1.21E-21 | 0.382203058 | 0.679 | 0.522 |
| HSD17B11  | 1.22E-21 | 0.331884134 | 0.578 | 0.41  |
| CTSA      | 1.23E-21 | 0.325867516 | 0.756 | 0.623 |
| SFRP41    | 1.39E-21 | 0.976679406 | 0.549 | 0.359 |
| A4GALT    | 1.52E-21 | 0.425361272 | 0.576 | 0.425 |
| MCUB1     | 1.53E-21 | 0.337900222 | 0.592 | 0.403 |
| FBN11     | 2.32E-21 | 0.475871907 | 0.958 | 0.801 |
| XPNPEP21  | 2.68E-21 | 0.341102789 | 0.318 | 0.159 |

|          |          |             |       |       |
|----------|----------|-------------|-------|-------|
| TMEM9B   | 4.81E-21 | 0.318752758 | 0.5   | 0.331 |
| JAM2     | 7.44E-21 | 0.319364906 | 0.453 | 0.281 |
| PROS11   | 7.97E-21 | 0.329641312 | 0.659 | 0.45  |
| RARRES21 | 9.45E-21 | 0.279517015 | 0.964 | 0.854 |
| ORAI3    | 1.07E-20 | 0.290734335 | 0.383 | 0.226 |
| PPL1     | 1.07E-20 | 0.350795133 | 0.404 | 0.23  |
| TCN2     | 1.09E-20 | 0.258683327 | 0.296 | 0.148 |
| PLPP31   | 1.12E-20 | 0.280899045 | 0.89  | 0.708 |
| CYB5R3   | 1.15E-20 | 0.304081514 | 0.877 | 0.768 |
| NFE2L21  | 1.34E-20 | 0.268315897 | 0.899 | 0.759 |
| UROD     | 1.93E-20 | 0.360150144 | 0.529 | 0.381 |
| IL331    | 1.99E-20 | 0.262697675 | 0.489 | 0.281 |
| WASHC3   | 2.17E-20 | 0.284416234 | 0.643 | 0.484 |
| FOXD1    | 2.21E-20 | 0.419997029 | 0.413 | 0.247 |
| JTB      | 2.29E-20 | 0.298643694 | 0.83  | 0.693 |
| SCN7A1   | 2.46E-20 | 0.467557291 | 0.464 | 0.269 |
| C1QTNF2  | 2.63E-20 | 0.293039725 | 0.381 | 0.216 |
| EFEMP21  | 2.75E-20 | 0.32107492  | 0.841 | 0.714 |
| ACE      | 2.99E-20 | 0.254871063 | 0.253 | 0.116 |
| NUCB2    | 3.16E-20 | 0.321458116 | 0.803 | 0.665 |
| DPP7     | 4.08E-20 | 0.366046176 | 0.733 | 0.61  |
| RAB34    | 5.05E-20 | 0.284622965 | 0.818 | 0.7   |
| SLC27A3  | 6.25E-20 | 0.2887491   | 0.336 | 0.182 |
| BLOC1S1  | 8.19E-20 | 0.327795736 | 0.78  | 0.665 |
| SCP21    | 1.18E-19 | 0.265775486 | 0.843 | 0.707 |
| FBLN51   | 1.24E-19 | 0.364491435 | 0.688 | 0.516 |
| EIF4EBP3 | 1.37E-19 | 0.268366127 | 0.336 | 0.183 |
| POLR2E   | 1.44E-19 | 0.250837866 | 0.708 | 0.579 |
| CALCRL1  | 1.73E-19 | 0.414418116 | 0.5   | 0.307 |
| H191     | 1.87E-19 | 0.318161649 | 0.316 | 0.156 |
| PYURF    | 1.97E-19 | 0.302291644 | 0.677 | 0.537 |
| ZFAS1    | 2.26E-19 | 0.290872644 | 0.892 | 0.828 |
| EIF4A2   | 2.30E-19 | 0.287653748 | 0.906 | 0.849 |
| NDN      | 2.90E-19 | 0.382751035 | 0.738 | 0.611 |
| PGRMC1   | 3.02E-19 | 0.315593424 | 0.783 | 0.639 |
| CRTAP    | 3.34E-19 | 0.347348699 | 0.792 | 0.679 |
| HEXA1    | 3.65E-19 | 0.366601682 | 0.666 | 0.538 |
| TMEM179B | 4.33E-19 | 0.317277917 | 0.67  | 0.527 |
| CCNDBP1  | 4.40E-19 | 0.288265276 | 0.5   | 0.347 |
| CDIPT    | 5.10E-19 | 0.31649598  | 0.572 | 0.425 |
| WDR83OS  | 8.38E-19 | 0.25133118  | 0.87  | 0.757 |
| G0S21    | 9.06E-19 | 0.433610996 | 0.366 | 0.202 |
| ATP6V0C  | 9.79E-19 | 0.311061795 | 0.845 | 0.733 |

|           |          |             |       |       |
|-----------|----------|-------------|-------|-------|
| NFIX1     | 1.04E-18 | 0.339764781 | 0.727 | 0.556 |
| ETFB      | 1.07E-18 | 0.253102971 | 0.709 | 0.572 |
| AHNAK1    | 1.14E-18 | 0.310545944 | 0.94  | 0.871 |
| PDLIM1    | 1.53E-18 | 0.265137938 | 0.845 | 0.712 |
| CD151     | 1.85E-18 | 0.261223144 | 0.892 | 0.779 |
| MGAT1     | 1.89E-18 | 0.345131667 | 0.699 | 0.577 |
| RRAGA     | 1.92E-18 | 0.298811387 | 0.65  | 0.535 |
| SH3GLB2   | 2.13E-18 | 0.303505616 | 0.475 | 0.318 |
| AKR1B1    | 2.40E-18 | 0.280161413 | 0.558 | 0.409 |
| TNFAIP21  | 3.66E-18 | 0.306358858 | 0.614 | 0.414 |
| SDF4      | 4.07E-18 | 0.315313828 | 0.78  | 0.669 |
| CD320     | 4.08E-18 | 0.28127191  | 0.403 | 0.251 |
| NUCB1     | 5.25E-18 | 0.267392928 | 0.843 | 0.732 |
| TCEA3     | 6.86E-18 | 0.335056233 | 0.426 | 0.273 |
| TMEM91    | 7.47E-18 | 0.277579055 | 0.412 | 0.256 |
| TUBB4B    | 7.59E-18 | 0.419166194 | 0.796 | 0.701 |
| PCBD1     | 8.11E-18 | 0.323156868 | 0.583 | 0.442 |
| CD68      | 8.35E-18 | 0.35035988  | 0.437 | 0.293 |
| SDHD      | 1.04E-17 | 0.297012368 | 0.69  | 0.547 |
| DDOST     | 1.26E-17 | 0.286249278 | 0.691 | 0.564 |
| ANXA7     | 1.46E-17 | 0.252113544 | 0.715 | 0.595 |
| PRSS231   | 1.48E-17 | 0.435947807 | 0.796 | 0.648 |
| GNB2      | 1.64E-17 | 0.254211855 | 0.769 | 0.643 |
| TRAC      | 1.83E-17 | 0.345177206 | 0.33  | 0.185 |
| CDC42EP2  | 2.09E-17 | 0.290920761 | 0.37  | 0.224 |
| TMBIM1    | 2.64E-17 | 0.293323011 | 0.561 | 0.43  |
| SNRPN     | 2.83E-17 | 0.303206195 | 0.675 | 0.547 |
| FUCA2     | 4.45E-17 | 0.288516996 | 0.592 | 0.471 |
| TMED4     | 1.00E-16 | 0.3049179   | 0.646 | 0.526 |
| TUBA1A1   | 1.00E-16 | 0.361060193 | 0.933 | 0.845 |
| RNF187    | 1.04E-16 | 0.292479654 | 0.59  | 0.478 |
| ALDH1A31  | 1.08E-16 | 0.451956109 | 0.473 | 0.306 |
| PSME1     | 1.17E-16 | 0.258430143 | 0.838 | 0.737 |
| RAB11B    | 1.21E-16 | 0.298605201 | 0.576 | 0.442 |
| GABARAPL1 | 1.53E-16 | 0.338796439 | 0.659 | 0.525 |
| HMGN3     | 1.72E-16 | 0.306993232 | 0.756 | 0.638 |
| RSPO31    | 1.76E-16 | 0.259459428 | 0.531 | 0.34  |
| THBS3     | 2.00E-16 | 0.284734056 | 0.486 | 0.341 |
| ECI2      | 2.81E-16 | 0.264309348 | 0.578 | 0.434 |
| STMN3     | 3.07E-16 | 0.276624503 | 0.449 | 0.314 |
| APOL11    | 3.15E-16 | 0.315446671 | 0.522 | 0.367 |
| SLC66A3   | 3.37E-16 | 0.271292218 | 0.473 | 0.333 |
| CD40      | 3.70E-16 | 0.254829478 | 0.43  | 0.283 |



|              |          |             |       |       |
|--------------|----------|-------------|-------|-------|
| ZNF706       | 3.88E-16 | 0.274911084 | 0.764 | 0.653 |
| PIK3R11      | 4.58E-16 | 0.259438568 | 0.859 | 0.722 |
| VAMP21       | 4.97E-16 | 0.301118211 | 0.673 | 0.559 |
| ITGB1BP1     | 5.92E-16 | 0.283303672 | 0.731 | 0.623 |
| ADAMTS51     | 6.05E-16 | 0.289466315 | 0.477 | 0.301 |
| HEBP1        | 8.18E-16 | 0.28999721  | 0.664 | 0.533 |
| SPTBN11      | 9.03E-16 | 0.283533857 | 0.888 | 0.739 |
| SDC2         | 1.04E-15 | 0.331087471 | 0.836 | 0.715 |
| HIGD2A       | 1.49E-15 | 0.251507686 | 0.751 | 0.626 |
| CBR1         | 1.64E-15 | 0.268736386 | 0.625 | 0.498 |
| MRFAP1       | 1.95E-15 | 0.26294675  | 0.881 | 0.793 |
| PPT1         | 2.03E-15 | 0.307770134 | 0.502 | 0.377 |
| HPGD1        | 2.08E-15 | 0.30588063  | 0.368 | 0.211 |
| GLIPR2       | 2.79E-15 | 0.271651612 | 0.514 | 0.38  |
| CERCAM1      | 3.05E-15 | 0.340218871 | 0.702 | 0.57  |
| GPRC5A1      | 3.56E-15 | 0.317096029 | 0.531 | 0.356 |
| PXDC11       | 3.58E-15 | 0.306615165 | 0.648 | 0.509 |
| ARAP1        | 7.83E-15 | 0.280868184 | 0.446 | 0.312 |
| CUTC1        | 1.18E-14 | 0.322564339 | 0.473 | 0.341 |
| GAS6         | 1.32E-14 | 0.454157437 | 0.619 | 0.487 |
| RDH14        | 1.38E-14 | 0.272650749 | 0.478 | 0.349 |
| GXYLT2       | 1.50E-14 | 0.318340192 | 0.662 | 0.508 |
| ST3GAL4      | 1.69E-14 | 0.263184447 | 0.523 | 0.399 |
| NCSTN        | 2.83E-14 | 0.349545913 | 0.413 | 0.289 |
| TENT5A1      | 3.25E-14 | 0.285979284 | 0.735 | 0.597 |
| DDIT3        | 5.21E-14 | 0.390694121 | 0.498 | 0.374 |
| ACTR10       | 5.30E-14 | 0.25402543  | 0.616 | 0.498 |
| BDKRB11      | 1.10E-13 | 0.410823258 | 0.314 | 0.183 |
| TMEM1001     | 1.12E-13 | 0.270693763 | 0.256 | 0.139 |
| EPB41L4A-AS1 | 1.44E-13 | 0.253050578 | 0.57  | 0.449 |
| WNT2B1       | 2.61E-13 | 0.301895077 | 0.412 | 0.269 |
| IL15RA1      | 2.69E-13 | 0.278755642 | 0.464 | 0.33  |
| RHOB1        | 2.84E-13 | 0.32737371  | 0.863 | 0.747 |
| PCYOX11      | 3.14E-13 | 0.274085193 | 0.616 | 0.491 |
| LINC011401   | 4.44E-13 | 0.261849451 | 0.363 | 0.23  |
| ITM2C        | 5.79E-13 | 0.375148802 | 0.704 | 0.627 |
| H1FX         | 7.33E-13 | 0.352455877 | 0.747 | 0.67  |
| CAPN2        | 7.77E-13 | 0.250537109 | 0.738 | 0.655 |
| SOCS1        | 7.91E-13 | 0.260189373 | 0.473 | 0.335 |
| LOXL1        | 1.26E-12 | 0.462349828 | 0.594 | 0.486 |
| SNX21        | 1.68E-12 | 0.279787887 | 0.44  | 0.321 |
| ALDH9A1      | 1.95E-12 | 0.25861068  | 0.46  | 0.346 |
| SPRY11       | 2.63E-12 | 0.260126182 | 0.652 | 0.485 |

|          |             |             |       |       |
|----------|-------------|-------------|-------|-------|
| CDKN1C1  | 2.80E-12    | 0.26627606  | 0.718 | 0.611 |
| BSG      | 3.04E-12    | 0.259441917 | 0.841 | 0.762 |
| FKBP7    | 3.11E-12    | 0.267061248 | 0.594 | 0.465 |
| LARP6    | 7.38E-12    | 0.270255582 | 0.469 | 0.353 |
| HIC1     | 1.03E-11    | 0.255352121 | 0.473 | 0.357 |
| LAMP2    | 1.31E-11    | 0.275974532 | 0.755 | 0.664 |
| RECK1    | 1.68E-11    | 0.267699602 | 0.57  | 0.446 |
| C21      | 1.95E-11    | 0.339227695 | 0.556 | 0.453 |
| ARL4D    | 2.47E-11    | 0.290198577 | 0.426 | 0.306 |
| MRC21    | 4.10E-11    | 0.264499867 | 0.819 | 0.677 |
| TUBB2A   | 5.38E-11    | 0.284441303 | 0.489 | 0.379 |
| APOD1    | 5.55E-11    | 0.709776598 | 0.421 | 0.277 |
| NBL11    | 5.68E-11    | 0.274325411 | 0.886 | 0.781 |
| HELLPAR1 | 5.74E-11    | 0.348362596 | 0.388 | 0.261 |
| C71      | 6.68E-11    | 0.504397509 | 0.397 | 0.256 |
| PNRC11   | 8.27E-11    | 0.256912753 | 0.93  | 0.867 |
| FXVD6    | 8.85E-11    | 0.311564574 | 0.475 | 0.364 |
| AGTRAP   | 9.70E-11    | 0.289946427 | 0.578 | 0.481 |
| CCS      | 1.74E-10    | 0.261376203 | 0.592 | 0.508 |
| EIF1B1   | 1.99E-10    | 0.295139139 | 0.758 | 0.669 |
| F31      | 6.41E-10    | 0.301909817 | 0.466 | 0.351 |
| MYADM    | 2.68E-09    | 0.262800436 | 0.731 | 0.655 |
| MMP21    | 1.35E-08    | 0.266522597 | 0.933 | 0.744 |
| INMT     | 2.35E-08    | 0.30637021  | 0.368 | 0.265 |
| EMP11    | 3.96E-08    | 0.298671393 | 0.843 | 0.734 |
| UGDH1    | 9.34E-08    | 0.338200279 | 0.67  | 0.595 |
| CAMK2N11 | 7.52E-07    | 0.272429717 | 0.601 | 0.529 |
| VASN     | 1.39E-06    | 0.29710101  | 0.469 | 0.403 |
| CES11    | 2.75E-06    | 0.316715386 | 0.352 | 0.266 |
| CSRNP1   | 4.38E-06    | 0.250262038 | 0.44  | 0.371 |
| IGLC2    | 0.007167517 | 0.431029953 | 0.307 | 0.256 |

| p_val_adj | cluster | gene      |
|-----------|---------|-----------|
| 0         | 0       | LAMA2     |
| 0         | 0       | ABI3BP    |
| 1.78E-301 | 0       | PID1      |
| 4.92E-280 | 0       | ABCA6     |
| 3.30E-265 | 0       | DCLK1     |
| 7.65E-264 | 0       | TGFBR3    |
| 9.54E-264 | 0       | NFIA      |
| 1.09E-256 | 0       | TNXB      |
| 8.05E-250 | 0       | ABCA8     |
| 3.10E-248 | 0       | CELF2     |
| 5.40E-244 | 0       | C3        |
| 1.43E-243 | 0       | ABLIM1    |
| 3.03E-239 | 0       | OGN       |
| 3.77E-239 | 0       | SLIT2     |
| 1.65E-234 | 0       | ABCA9     |
| 3.55E-234 | 0       | MGST1     |
| 4.81E-234 | 0       | LINC01239 |
| 9.54E-234 | 0       | SCARA5    |
| 2.65E-229 | 0       | SVEP1     |
| 8.77E-228 | 0       | NLGN1     |
| 4.27E-216 | 0       | FGF14     |
| 4.47E-213 | 0       | FGF7      |
| 1.90E-212 | 0       | ADH1B     |
| 2.80E-209 | 0       | CFD       |
| 3.89E-208 | 0       | SERPINA3  |
| 1.43E-207 | 0       | CCDC80    |
| 1.97E-207 | 0       | CLU       |
| 5.22E-204 | 0       | NOVA1     |
| 1.06E-203 | 0       | EFEMP1    |
| 7.76E-202 | 0       | FBLN1     |
| 1.30E-201 | 0       | MIR99AHG  |
| 4.26E-201 | 0       | ADGRD1    |
| 1.78E-199 | 0       | AOX1      |
| 6.88E-199 | 0       | SLC9A9    |
| 2.11E-198 | 0       | FOXP2     |
| 1.28E-195 | 0       | ADD3      |
| 1.12E-194 | 0       | PODN      |
| 6.58E-193 | 0       | C1orf21   |
| 3.00E-192 | 0       | RBMS3     |
| 3.43E-191 | 0       | CHRD1     |
| 4.30E-191 | 0       | CFH       |

|           |   |          |
|-----------|---|----------|
| 4.43E-191 | 0 | ZBTB16   |
| 6.61E-191 | 0 | ITM2A    |
| 3.75E-190 | 0 | IL33     |
| 9.38E-189 | 0 | CXCL12   |
| 3.62E-188 | 0 | PLA2G2A  |
| 3.01E-187 | 0 | MGP      |
| 5.87E-187 | 0 | DCN      |
| 4.97E-185 | 0 | GSN      |
| 1.11E-184 | 0 | NEGR1    |
| 2.48E-183 | 0 | EBF1     |
| 2.52E-182 | 0 | SFRP1    |
| 1.94E-181 | 0 | DLG2     |
| 7.96E-181 | 0 | GFRA1    |
| 1.68E-179 | 0 | COL4A4   |
| 1.88E-177 | 0 | FMNL2    |
| 3.20E-176 | 0 | COL14A1  |
| 4.27E-175 | 0 | CCN5     |
| 1.92E-174 | 0 | PDGFRA   |
| 5.86E-174 | 0 | SLIT3    |
| 1.11E-173 | 0 | SELENOP  |
| 8.94E-173 | 0 | LRP1     |
| 1.02E-172 | 0 | METTL7A  |
| 1.47E-171 | 0 | ANK2     |
| 2.37E-169 | 0 | TFPI     |
| 1.23E-167 | 0 | CILP     |
| 1.25E-166 | 0 | PCOLCE2  |
| 1.27E-166 | 0 | CYBRD1   |
| 1.74E-166 | 0 | CST3     |
| 2.02E-166 | 0 | LTBP4    |
| 6.02E-166 | 0 | ABCA10   |
| 8.82E-166 | 0 | ZFPM2    |
| 1.88E-164 | 0 | PI16     |
| 1.13E-162 | 0 | ADAMTSL3 |
| 1.84E-162 | 0 | C1R      |
| 1.36E-160 | 0 | 3-Mar    |
| 1.84E-159 | 0 | USP53    |
| 1.12E-158 | 0 | AKR1C1   |
| 2.44E-157 | 0 | ELN      |
| 7.03E-157 | 0 | DDR2     |
| 1.64E-156 | 0 | CD34     |
| 1.96E-156 | 0 | KAZN     |
| 3.60E-156 | 0 | C1S      |
| 8.49E-156 | 0 | MFAP4    |

|           |   |            |
|-----------|---|------------|
| 1.59E-155 | 0 | RSPO3      |
| 2.31E-154 | 0 | CARMIL1    |
| 1.25E-153 | 0 | UST        |
| 2.00E-153 | 0 | PTGIS      |
| 1.93E-151 | 0 | GPX3       |
| 5.50E-151 | 0 | SLPI       |
| 2.66E-150 | 0 | CNTN4      |
| 2.70E-150 | 0 | EGFR       |
| 9.55E-150 | 0 | AC108734.4 |
| 1.45E-149 | 0 | ZBTB20     |
| 1.49E-148 | 0 | SERPING1   |
| 1.66E-147 | 0 | PLAC9      |
| 6.46E-147 | 0 | PROS1      |
| 2.44E-146 | 0 | SMIM14     |
| 6.55E-144 | 0 | IGF1       |
| 2.07E-143 | 0 | MAPK10     |
| 1.59E-142 | 0 | PAR3B      |
| 3.70E-142 | 0 | UAP1       |
| 1.27E-141 | 0 | SRPX       |
| 8.54E-141 | 0 | ALDH1A1    |
| 1.02E-140 | 0 | KLF4       |
| 2.04E-139 | 0 | PLTP       |
| 4.73E-138 | 0 | PCDH9      |
| 6.50E-137 | 0 | SFRP2      |
| 2.28E-136 | 0 | AL445426.1 |
| 1.34E-135 | 0 | LMO3       |
| 2.56E-135 | 0 | FBLN2      |
| 5.44E-134 | 0 | RARRES1    |
| 8.28E-134 | 0 | AP002518.2 |
| 9.71E-133 | 0 | TXNIP      |
| 4.15E-132 | 0 | SDK1       |
| 4.61E-132 | 0 | SERPINF1   |
| 5.11E-132 | 0 | ADAMTS5    |
| 3.22E-130 | 0 | ELMO1      |
| 4.09E-130 | 0 | SERPINE2   |
| 1.25E-129 | 0 | SEMA3C     |
| 1.50E-129 | 0 | IL6ST      |
| 1.50E-128 | 0 | GPNMB      |
| 1.96E-128 | 0 | PCSK5      |
| 3.77E-127 | 0 | IGFBP6     |
| 1.04E-126 | 0 | ADAMTSL4   |
| 3.36E-126 | 0 | COL4A3     |
| 7.45E-126 | 0 | SPATA6     |

|           |   |            |
|-----------|---|------------|
| 7.78E-126 | 0 | ADAMTSL1   |
| 8.25E-126 | 0 | CREB5      |
| 1.12E-125 | 0 | SPTBN1     |
| 2.77E-125 | 0 | FBN1       |
| 3.18E-125 | 0 | TSHZ2      |
| 5.26E-125 | 0 | EFNA5      |
| 2.45E-124 | 0 | PLPP3      |
| 8.91E-124 | 0 | CP         |
| 9.54E-124 | 0 | ZNF385B    |
| 2.15E-123 | 0 | DLC1       |
| 5.50E-122 | 0 | PRELP      |
| 6.46E-122 | 0 | IGSF10     |
| 3.66E-121 | 0 | PLSCR4     |
| 5.63E-120 | 0 | NFIB       |
| 1.15E-119 | 0 | PIK3R1     |
| 1.33E-119 | 0 | CACNB4     |
| 1.96E-119 | 0 | AL391117.1 |
| 5.91E-119 | 0 | LRRN4CL    |
| 9.44E-119 | 0 | TTC28      |
| 2.00E-118 | 0 | CPVL       |
| 2.33E-118 | 0 | MAMDC2     |
| 2.34E-118 | 0 | DPYD       |
| 7.27E-118 | 0 | TGFBR2     |
| 1.46E-117 | 0 | TNFAIP2    |
| 1.66E-117 | 0 | FCGRT      |
| 2.39E-117 | 0 | VIT        |
| 8.88E-117 | 0 | EPB41L3    |
| 1.36E-116 | 0 | RAB8B      |
| 4.79E-116 | 0 | FGF13      |
| 5.84E-116 | 0 | LINC02147  |
| 1.27E-115 | 0 | FOXO3      |
| 1.56E-115 | 0 | OMD        |
| 2.61E-115 | 0 | NFE2L2     |
| 2.66E-115 | 0 | LSAMP      |
| 4.64E-115 | 0 | LPAR1      |
| 6.79E-115 | 0 | SH3D19     |
| 6.80E-115 | 0 | PREX2      |
| 1.07E-114 | 0 | RDH10      |
| 5.13E-113 | 0 | CPQ        |
| 8.01E-113 | 0 | ZFP36L2    |
| 8.12E-113 | 0 | QSOX1      |
| 3.11E-112 | 0 | RTN4       |
| 4.20E-112 | 0 | MFAP5      |

|           |   |          |
|-----------|---|----------|
| 1.11E-111 | 0 | MYOC     |
| 1.15E-111 | 0 | SCPEP1   |
| 4.02E-111 | 0 | GALNT15  |
| 8.41E-109 | 0 | FGL2     |
| 1.11E-108 | 0 | DPYSL2   |
| 1.64E-108 | 0 | SETBP1   |
| 9.25E-108 | 0 | NAALADL2 |
| 1.42E-107 | 0 | CLEC3B   |
| 2.66E-107 | 0 | RNASE4   |
| 1.09E-104 | 0 | MAN1A1   |
| 2.46E-103 | 0 | HIF3A    |
| 5.14E-103 | 0 | PSAP     |
| 5.28E-103 | 0 | SAMHD1   |
| 7.28E-103 | 0 | PLXDC2   |
| 1.08E-101 | 0 | SCN7A    |
| 1.32E-101 | 0 | C1QTNF3  |
| 1.37E-101 | 0 | PDZRN4   |
| 5.20E-101 | 0 | SRGAP1   |
| 1.88E-100 | 0 | CADM3    |
| 4.30E-100 | 0 | HELLPAR  |
| 1.65E-99  | 0 | RORA     |
| 2.46E-99  | 0 | OAF      |
| 1.44E-98  | 0 | ALDH2    |
| 2.81E-98  | 0 | FXYD1    |
| 3.40E-98  | 0 | FHL1     |
| 4.70E-98  | 0 | IL15RA   |
| 8.83E-98  | 0 | DIAPH2   |
| 2.22E-97  | 0 | NAV3     |
| 3.18E-97  | 0 | CYP1B1   |
| 3.35E-97  | 0 | KCNT2    |
| 1.27E-96  | 0 | CHRM3    |
| 4.36E-96  | 0 | SOD3     |
| 4.72E-96  | 0 | CD302    |
| 1.15E-95  | 0 | SH3BP5   |
| 1.72E-95  | 0 | CBLB     |
| 1.91E-95  | 0 | PBX1     |
| 1.56E-94  | 0 | CYP4B1   |
| 2.43E-94  | 0 | PMP22    |
| 3.63E-94  | 0 | IL18     |
| 8.53E-94  | 0 | CRYBG3   |
| 1.05E-93  | 0 | LRFN5    |
| 3.76E-93  | 0 | ESR1     |
| 7.12E-93  | 0 | EPB41L2  |

|          |   |            |
|----------|---|------------|
| 4.12E-92 | 0 | ACVRL1     |
| 4.74E-92 | 0 | MBP        |
| 7.18E-92 | 0 | DPT        |
| 9.60E-92 | 0 | TACC1      |
| 3.03E-91 | 0 | TCF21      |
| 3.65E-91 | 0 | GASK1A     |
| 1.83E-90 | 0 | MEDAG      |
| 2.69E-90 | 0 | DSCAML1    |
| 5.74E-90 | 0 | CFB        |
| 7.80E-90 | 0 | CALCRL     |
| 1.18E-89 | 0 | SSH2       |
| 2.52E-89 | 0 | MEG3       |
| 3.74E-89 | 0 | IRAK3      |
| 4.72E-89 | 0 | LINC01133  |
| 6.44E-89 | 0 | NFIX       |
| 7.62E-89 | 0 | LSP1       |
| 8.30E-89 | 0 | KANK1      |
| 1.87E-88 | 0 | ABCA9-AS1  |
| 6.03E-88 | 0 | ECHDC2     |
| 7.13E-88 | 0 | XPNPEP2    |
| 9.43E-88 | 0 | SLC19A2    |
| 1.19E-86 | 0 | FBXL7      |
| 1.50E-86 | 0 | PCNX2      |
| 3.29E-86 | 0 | AKR1C2     |
| 4.64E-86 | 0 | VEGFD      |
| 1.30E-85 | 0 | OPHN1      |
| 3.35E-85 | 0 | FAM107A    |
| 4.24E-85 | 0 | TMEM132C   |
| 9.19E-85 | 0 | AKR1C3     |
| 9.77E-85 | 0 | C7         |
| 1.20E-84 | 0 | FBLN5      |
| 1.86E-84 | 0 | GNA14      |
| 1.04E-83 | 0 | PAMR1      |
| 1.32E-83 | 0 | APLP2      |
| 1.42E-83 | 0 | CSGALNACT1 |
| 1.61E-83 | 0 | PLBD1      |
| 2.89E-83 | 0 | ATP1A1     |
| 3.79E-83 | 0 | GPRC5A     |
| 5.66E-83 | 0 | SAMD4A     |
| 1.29E-82 | 0 | ARHGAP10   |
| 3.10E-82 | 0 | GFPT2      |
| 7.31E-82 | 0 | BNC2       |
| 9.37E-82 | 0 | ITGBL1     |



|          |   |            |
|----------|---|------------|
| 7.68E-81 | 0 | LTBP3      |
| 7.81E-81 | 0 | RNF217     |
| 1.01E-80 | 0 | AC092691.1 |
| 1.08E-80 | 0 | SHISA3     |
| 1.14E-80 | 0 | SMAD3      |
| 1.46E-80 | 0 | APBB1IP    |
| 2.28E-80 | 0 | AC007319.1 |
| 7.27E-80 | 0 | CAB39L     |
| 1.70E-79 | 0 | ASPA       |
| 2.37E-79 | 0 | OSR1       |
| 2.52E-79 | 0 | EPHA6      |
| 3.14E-79 | 0 | LHFPL6     |
| 4.11E-79 | 0 | SEMA3E     |
| 4.96E-79 | 0 | ABHD5      |
| 5.74E-79 | 0 | LIMCH1     |
| 5.97E-79 | 0 | LRRK2      |
| 9.01E-79 | 0 | CYP1B1-AS1 |
| 9.51E-79 | 0 | LINC01697  |
| 1.48E-78 | 0 | OLFML3     |
| 3.21E-78 | 0 | FAT4       |
| 4.07E-78 | 0 | TNFSF13B   |
| 5.79E-78 | 0 | LEPR       |
| 5.97E-78 | 0 | MATN2      |
| 1.24E-77 | 0 | C16orf89   |
| 1.47E-77 | 0 | TMTC1      |
| 1.86E-77 | 0 | TRIOBP     |
| 2.45E-77 | 0 | FKBP5      |
| 5.15E-77 | 0 | SPRY1      |
| 8.04E-77 | 0 | NID1       |
| 1.07E-76 | 0 | IL16       |
| 3.46E-76 | 0 | MEIS1      |
| 3.58E-76 | 0 | SYNE1      |
| 5.93E-76 | 0 | ADAM33     |
| 6.79E-76 | 0 | FIBIN      |
| 9.65E-76 | 0 | FAXDC2     |
| 3.53E-75 | 0 | EEF2K      |
| 6.59E-75 | 0 | PDK4       |
| 7.92E-75 | 0 | PLAGL1     |
| 1.29E-74 | 0 | NPC2       |
| 1.53E-74 | 0 | SOX5       |
| 6.59E-74 | 0 | ELF1       |
| 8.26E-74 | 0 | ARL15      |
| 1.96E-73 | 0 | BOC        |

|          |   |            |
|----------|---|------------|
| 2.56E-73 | 0 | AL139383.1 |
| 6.01E-73 | 0 | SNED1      |
| 6.11E-73 | 0 | EHBP1      |
| 7.33E-73 | 0 | ASAP2      |
| 8.20E-73 | 0 | AGAP1      |
| 9.67E-73 | 0 | ANXA1      |
| 1.18E-72 | 0 | HIGD1A     |
| 1.20E-72 | 0 | LAMC1      |
| 1.94E-72 | 0 | LIMA1      |
| 4.34E-72 | 0 | FLRT2      |
| 4.78E-72 | 0 | GLUL       |
| 6.38E-72 | 0 | EPHX1      |
| 1.67E-71 | 0 | KIAA0408   |
| 1.81E-71 | 0 | TIMP3      |
| 1.98E-71 | 0 | AFF1       |
| 4.70E-71 | 0 | PARD3      |
| 8.49E-71 | 0 | LINC02511  |
| 9.50E-71 | 0 | ADAMTS15   |
| 1.11E-70 | 0 | FEZ1       |
| 1.58E-70 | 0 | FILIP1     |
| 1.91E-70 | 0 | PLCB1      |
| 1.95E-70 | 0 | SULT1A1    |
| 3.46E-70 | 0 | LINC02802  |
| 3.63E-70 | 0 | MSR1       |
| 3.91E-70 | 0 | RECK       |
| 6.46E-70 | 0 | FSTL1      |
| 1.07E-69 | 0 | SGCG       |
| 1.46E-69 | 0 | STK32B     |
| 1.55E-69 | 0 | FTX        |
| 3.76E-69 | 0 | MCUB       |
| 5.42E-69 | 0 | HMCN2      |
| 8.67E-69 | 0 | GHR        |
| 1.36E-68 | 0 | CCDC69     |
| 1.49E-68 | 0 | VIPR2      |
| 2.05E-68 | 0 | CYB5A      |
| 2.09E-68 | 0 | DENND2A    |
| 2.21E-68 | 0 | DST        |
| 4.03E-68 | 0 | LVRN       |
| 6.52E-68 | 0 | C17orf58   |
| 6.58E-68 | 0 | OSR2       |
| 1.16E-67 | 0 | CREG1      |
| 3.66E-67 | 0 | LINC01140  |
| 5.44E-67 | 0 | PRNP       |

|          |   |         |
|----------|---|---------|
| 6.66E-67 | 0 | PCSK6   |
| 9.36E-67 | 0 | NCOA1   |
| 2.06E-66 | 0 | ALDH1A3 |
| 2.93E-66 | 0 | PIEZO2  |
| 6.95E-66 | 0 | WNT2B   |
| 7.61E-66 | 0 | FMO2    |
| 1.22E-65 | 0 | TNFSF10 |
| 1.24E-65 | 0 | REV3L   |
| 1.49E-65 | 0 | FGFR1   |
| 1.80E-65 | 0 | VSIR    |
| 1.87E-65 | 0 | PRKAG2  |
| 2.33E-65 | 0 | TENT5A  |
| 4.66E-65 | 0 | ITM2B   |
| 5.78E-65 | 0 | RHOBTB3 |
| 7.32E-65 | 0 | GSTM5   |
| 9.54E-65 | 0 | SASH1   |
| 1.18E-64 | 0 | PHGDH   |
| 1.66E-64 | 0 | SESTD1  |
| 1.70E-64 | 0 | PXDC1   |
| 1.75E-64 | 0 | PTPRS   |
| 4.36E-64 | 0 | PLAAT4  |
| 5.10E-64 | 0 | PTGFR   |
| 6.90E-64 | 0 | C1RL    |
| 7.27E-64 | 0 | ACKR3   |
| 9.50E-64 | 0 | FGF2    |
| 1.03E-63 | 0 | BDH2    |
| 1.09E-63 | 0 | ZNF385A |
| 1.82E-63 | 0 | NIPAL2  |
| 6.08E-63 | 0 | PPL     |
| 8.13E-63 | 0 | ABL1    |
| 1.04E-62 | 0 | SPTLC3  |
| 1.62E-62 | 0 | CTSF    |
| 1.67E-62 | 0 | BCHE    |
| 1.90E-62 | 0 | DOCK4   |
| 2.68E-62 | 0 | PLEKHA6 |
| 6.42E-62 | 0 | DAAM1   |
| 9.84E-62 | 0 | MAN1C1  |
| 1.35E-61 | 0 | SEMA6A  |
| 2.98E-61 | 0 | ARHGEF3 |
| 4.76E-61 | 0 | RAMP2   |
| 1.20E-60 | 0 | WWP1    |
| 1.64E-60 | 0 | ACSS3   |
| 2.23E-60 | 0 | PALM    |

|          |   |            |
|----------|---|------------|
| 2.66E-60 | 0 | LINC01798  |
| 3.62E-60 | 0 | CTSH       |
| 4.86E-60 | 0 | CDON       |
| 1.51E-59 | 0 | ARL6IP5    |
| 1.66E-59 | 0 | BMERB1     |
| 2.04E-59 | 0 | SLC16A4    |
| 2.31E-59 | 0 | APOD       |
| 2.33E-59 | 0 | BICC1      |
| 4.44E-59 | 0 | AKAP12     |
| 4.84E-59 | 0 | CEP126     |
| 5.77E-59 | 0 | MAML2      |
| 7.10E-59 | 0 | NAMPT      |
| 7.68E-59 | 0 | RUNX1T1    |
| 9.14E-59 | 0 | NPR1       |
| 1.02E-58 | 0 | GREM2      |
| 1.09E-58 | 0 | BHMT2      |
| 2.29E-58 | 0 | CLIP4      |
| 2.42E-58 | 0 | RBMS3-AS2  |
| 3.31E-58 | 0 | CBR3       |
| 3.52E-58 | 0 | EMILIN2    |
| 5.18E-58 | 0 | TNFAIP8L3  |
| 6.43E-58 | 0 | TBC1D12    |
| 1.98E-57 | 0 | AC008105.3 |
| 2.15E-57 | 0 | JADE1      |
| 2.84E-57 | 0 | OLFML1     |
| 5.94E-57 | 0 | PROCR      |
| 1.08E-56 | 0 | SSC5D      |
| 1.11E-56 | 0 | SLC16A7    |
| 1.54E-56 | 0 | PCYOX1     |
| 1.94E-56 | 0 | ROR1       |
| 3.07E-56 | 0 | ADGRB3     |
| 3.14E-56 | 0 | GNG11      |
| 3.24E-56 | 0 | MIR100HG   |
| 4.76E-56 | 0 | NDRG1      |
| 1.17E-55 | 0 | AUTS2      |
| 1.71E-55 | 0 | SDCBP      |
| 2.44E-55 | 0 | RGL1       |
| 5.40E-55 | 0 | TMEM176B   |
| 5.55E-55 | 0 | AP001528.1 |
| 1.37E-54 | 0 | STXBP6     |
| 1.43E-54 | 0 | APP        |
| 1.77E-54 | 0 | ZNF704     |
| 2.56E-54 | 0 | ITGA9      |

|          |   |             |
|----------|---|-------------|
| 3.28E-54 | 0 | BACH2       |
| 3.38E-54 | 0 | KIAA1328    |
| 3.85E-54 | 0 | P2RX2       |
| 5.65E-54 | 0 | STEAP2      |
| 6.08E-54 | 0 | RGMA        |
| 6.10E-54 | 0 | FER         |
| 1.58E-53 | 0 | LPCAT2      |
| 2.06E-53 | 0 | MAGI2       |
| 2.43E-53 | 0 | PTGES       |
| 2.44E-53 | 0 | RBMS1       |
| 2.85E-53 | 0 | AC124852.1  |
| 3.91E-53 | 0 | GPSM2       |
| 9.57E-53 | 0 | CLIC2       |
| 1.44E-52 | 0 | BMP4        |
| 1.52E-52 | 0 | AL356124.1  |
| 1.98E-52 | 0 | ROBO3       |
| 3.31E-52 | 0 | NPDC1       |
| 3.80E-52 | 0 | PTPRG       |
| 4.73E-52 | 0 | MAGI3       |
| 5.25E-52 | 0 | RHOU        |
| 1.03E-51 | 0 | CUTC        |
| 1.35E-51 | 0 | TMEM176A    |
| 3.04E-51 | 0 | AL109930.1  |
| 5.96E-51 | 0 | SLC25A37    |
| 6.85E-51 | 0 | MYO9A       |
| 1.50E-50 | 0 | THRB        |
| 1.63E-50 | 0 | KLHL13      |
| 1.83E-50 | 0 | ARHGAP6     |
| 2.25E-50 | 0 | PRKN        |
| 2.83E-50 | 0 | FAM198B-AS1 |
| 3.46E-50 | 0 | ARHGAP26    |
| 5.66E-50 | 0 | MED13L      |
| 6.66E-50 | 0 | FBXO42      |
| 6.87E-50 | 0 | CYP27A1     |
| 9.53E-50 | 0 | PITPNM2     |
| 2.66E-49 | 0 | C1QTNF7     |
| 2.87E-49 | 0 | NR2F1       |
| 4.18E-49 | 0 | NFKBIZ      |
| 5.16E-49 | 0 | PTX3        |
| 6.06E-49 | 0 | WIF1        |
| 6.88E-49 | 0 | FAIM2       |
| 7.16E-49 | 0 | CD81        |
| 1.02E-48 | 0 | LINC00278   |

|          |   |            |
|----------|---|------------|
| 1.73E-48 | 0 | IFIT1      |
| 1.77E-48 | 0 | F10        |
| 1.97E-48 | 0 | ITGB8      |
| 2.79E-48 | 0 | S100A13    |
| 4.20E-48 | 0 | HPGD       |
| 4.63E-48 | 0 | NTN4       |
| 5.26E-48 | 0 | PLD3       |
| 6.06E-48 | 0 | LITAF      |
| 6.12E-48 | 0 | PXN        |
| 6.83E-48 | 0 | VPS13B     |
| 6.90E-48 | 0 | ABHD15-AS1 |
| 7.38E-48 | 0 | CDKN2C     |
| 2.01E-47 | 0 | PIR        |
| 2.35E-47 | 0 | PKD2       |
| 2.40E-47 | 0 | ERRFI1     |
| 2.49E-47 | 0 | ACKR4      |
| 2.75E-47 | 0 | MEG8       |
| 4.15E-47 | 0 | GAS1       |
| 4.15E-47 | 0 | DYNC2H1    |
| 4.70E-47 | 0 | SPSB1      |
| 5.00E-47 | 0 | ARHGAP29   |
| 5.36E-47 | 0 | LDB2       |
| 8.38E-47 | 0 | FAM227B    |
| 8.71E-47 | 0 | DHRS3      |
| 1.98E-46 | 0 | NUPR1      |
| 2.50E-46 | 0 | KITLG      |
| 2.54E-46 | 0 | CC2D2A     |
| 3.12E-46 | 0 | ARHGAP21   |
| 3.90E-46 | 0 | ZHX3       |
| 5.57E-46 | 0 | TMOD2      |
| 5.89E-46 | 0 | MYC        |
| 7.42E-46 | 0 | SSPN       |
| 8.51E-46 | 0 | PNRC1      |
| 9.31E-46 | 0 | N4BP2L2    |
| 2.30E-45 | 0 | ARHGEF26   |
| 2.66E-45 | 0 | DDAH2      |
| 2.89E-45 | 0 | PPP3CA     |
| 3.50E-45 | 0 | FIGN       |
| 4.22E-45 | 0 | FAM172A    |
| 8.14E-45 | 0 | CSF1       |
| 8.61E-45 | 0 | FAM110B    |
| 1.04E-44 | 0 | SPOCK1     |
| 1.05E-44 | 0 | NNMT       |

|          |   |            |
|----------|---|------------|
| 2.06E-44 | 0 | FAM180A    |
| 4.50E-44 | 0 | ARHGAP12   |
| 5.01E-44 | 0 | VAT1       |
| 1.14E-43 | 0 | CRLF1      |
| 1.91E-43 | 0 | TMEM35B    |
| 2.08E-43 | 0 | PAM        |
| 2.53E-43 | 0 | PBX3       |
| 3.75E-43 | 0 | APOL1      |
| 4.53E-43 | 0 | MN1        |
| 5.70E-43 | 0 | EEA1       |
| 8.99E-43 | 0 | BDKRB2     |
| 1.17E-42 | 0 | LGALS3     |
| 1.25E-42 | 0 | RNF13      |
| 1.46E-42 | 0 | GRK5       |
| 1.50E-42 | 0 | ZNF638     |
| 1.55E-42 | 0 | GREB1      |
| 1.65E-42 | 0 | BLVRB      |
| 1.72E-42 | 0 | WSB1       |
| 2.58E-42 | 0 | AC079298.3 |
| 2.68E-42 | 0 | EPHA3      |
| 2.86E-42 | 0 | APOL3      |
| 3.23E-42 | 0 | TCF7L2     |
| 4.16E-42 | 0 | TWIST2     |
| 6.57E-42 | 0 | NR3C2      |
| 7.08E-42 | 0 | EMP1       |
| 7.16E-42 | 0 | ANG        |
| 1.39E-41 | 0 | AGTR1      |
| 1.69E-41 | 0 | BST1       |
| 1.86E-41 | 0 | PGRMC2     |
| 4.01E-41 | 0 | TMEM72-AS1 |
| 5.95E-41 | 0 | FHIT       |
| 6.39E-41 | 0 | CPED1      |
| 1.24E-40 | 0 | ABHD14A    |
| 1.38E-40 | 0 | KLF9       |
| 1.44E-40 | 0 | HGF        |
| 1.46E-40 | 0 | TPST1      |
| 1.58E-40 | 0 | CFLAR      |
| 1.90E-40 | 0 | AC005237.1 |
| 2.01E-40 | 0 | SCP2       |
| 2.54E-40 | 0 | GLI3       |
| 2.60E-40 | 0 | CPNE3      |
| 3.08E-40 | 0 | ZFPM2-AS1  |
| 3.41E-40 | 0 | SH3PXD2B   |

|          |   |            |
|----------|---|------------|
| 3.97E-40 | 0 | CCNL1      |
| 4.24E-40 | 0 | GULP1      |
| 6.17E-40 | 0 | DIO3OS     |
| 9.48E-40 | 0 | CD74       |
| 1.16E-39 | 0 | CADPS2     |
| 1.38E-39 | 0 | PCDH17     |
| 1.68E-39 | 0 | FAM13A     |
| 1.68E-39 | 0 | DAPK1      |
| 2.17E-39 | 0 | AL033523.1 |
| 2.37E-39 | 0 | SPART      |
| 2.51E-39 | 0 | ITPKC      |
| 3.38E-39 | 0 | EXT1       |
| 3.71E-39 | 0 | SYTL4      |
| 5.48E-39 | 0 | RASSF4     |
| 6.58E-39 | 0 | TANK       |
| 1.13E-38 | 0 | LINC01266  |
| 1.51E-38 | 0 | ZNF106     |
| 1.58E-38 | 0 | DANT2      |
| 2.11E-38 | 0 | EPS15      |
| 2.31E-38 | 0 | ENOSF1     |
| 2.37E-38 | 0 | IGFBP4     |
| 2.60E-38 | 0 | ACACB      |
| 2.80E-38 | 0 | PDZRN3     |
| 3.51E-38 | 0 | ST3GAL1    |
| 5.04E-38 | 0 | MOB3B      |
| 6.15E-38 | 0 | SGCE       |
| 8.63E-38 | 0 | ADH5       |
| 8.85E-38 | 0 | GPRC5D-AS1 |
| 1.02E-37 | 0 | WARS2-AS1  |
| 1.45E-37 | 0 | PAK3       |
| 1.46E-37 | 0 | UGDH       |
| 2.13E-37 | 0 | TBC1D5     |
| 2.55E-37 | 0 | TSC22D3    |
| 2.84E-37 | 0 | GSTM3      |
| 4.35E-37 | 0 | F3         |
| 4.52E-37 | 0 | GPC3       |
| 4.61E-37 | 0 | IRF2BP2    |
| 5.62E-37 | 0 | SAV1       |
| 8.58E-37 | 0 | SEMA3B     |
| 8.70E-37 | 0 | PRX        |
| 1.03E-36 | 0 | CITED2     |
| 1.59E-36 | 0 | CHPT1      |
| 1.65E-36 | 0 | MIPOL1     |



|          |   |            |
|----------|---|------------|
| 2.23E-36 | 0 | PDLIM1     |
| 2.88E-36 | 0 | CD248      |
| 3.94E-36 | 0 | AC098829.1 |
| 4.99E-36 | 0 | AHR        |
| 6.01E-36 | 0 | MBD5       |
| 7.74E-36 | 0 | OSBPL9     |
| 9.02E-36 | 0 | INTS6      |
| 9.22E-36 | 0 | LAMB2      |
| 1.02E-35 | 0 | MLH3       |
| 1.79E-35 | 0 | FAM43A     |
| 2.31E-35 | 0 | MPZL1      |
| 3.14E-35 | 0 | HMCN1      |
| 3.37E-35 | 0 | TSPAN4     |
| 3.93E-35 | 0 | PDE4C      |
| 4.89E-35 | 0 | FGD5       |
| 6.65E-35 | 0 | SRSF5      |
| 7.86E-35 | 0 | TMBIM4     |
| 8.66E-35 | 0 | ANKAR      |
| 8.73E-35 | 0 | ALPK1      |
| 1.07E-34 | 0 | EXOC6B     |
| 1.14E-34 | 0 | LGALS3BP   |
| 1.20E-34 | 0 | FOXN3      |
| 1.28E-34 | 0 | SOD2       |
| 1.47E-34 | 0 | AHNAK      |
| 2.30E-34 | 0 | C2         |
| 2.34E-34 | 0 | NLGN4Y     |
| 4.19E-34 | 0 | LRRK1      |
| 9.46E-34 | 0 | HEXA       |
| 1.02E-33 | 0 | GMDS-DT    |
| 1.18E-33 | 0 | MEIS2      |
| 1.43E-33 | 0 | PDE7A      |
| 1.85E-33 | 0 | ASAP3      |
| 1.94E-33 | 0 | CHD9       |
| 3.06E-33 | 0 | C5orf56    |
| 4.49E-33 | 0 | SLC25A13   |
| 5.36E-33 | 0 | CTSO       |
| 6.59E-33 | 0 | TRPC1      |
| 7.38E-33 | 0 | TMEM100    |
| 9.40E-33 | 0 | POGLUT3    |
| 1.20E-32 | 0 | SDCCAG8    |
| 1.23E-32 | 0 | LONRF3     |
| 1.29E-32 | 0 | CA12       |
| 1.45E-32 | 0 | GAS7       |

|          |   |            |
|----------|---|------------|
| 3.27E-32 | 0 | RAI2       |
| 3.65E-32 | 0 | UGGT2      |
| 4.12E-32 | 0 | HIVEP1     |
| 4.35E-32 | 0 | GLRX       |
| 4.67E-32 | 0 | ITIH5      |
| 4.74E-32 | 0 | ZHX2       |
| 6.38E-32 | 0 | GASK1B     |
| 6.51E-32 | 0 | DENND1A    |
| 7.82E-32 | 0 | IMMP2L     |
| 8.46E-32 | 0 | AZI2       |
| 8.88E-32 | 0 | AASS       |
| 9.06E-32 | 0 | AUH        |
| 9.06E-32 | 0 | EVC2       |
| 9.61E-32 | 0 | CD55       |
| 1.02E-31 | 0 | CDKN1C     |
| 2.03E-31 | 0 | RFX2       |
| 3.28E-31 | 0 | AL078604.4 |
| 4.33E-31 | 0 | LTBP2      |
| 5.65E-31 | 0 | TOR1AIP1   |
| 8.08E-31 | 0 | NGF        |
| 1.32E-30 | 0 | TMEM108    |
| 3.37E-30 | 0 | MRNIP      |
| 3.48E-30 | 0 | NFATC2     |
| 3.95E-30 | 0 | WWOX       |
| 4.61E-30 | 0 | AHI1       |
| 5.04E-30 | 0 | CACHD1     |
| 6.80E-30 | 0 | MAOA       |
| 8.28E-30 | 0 | AKAP13     |
| 8.52E-30 | 0 | BCKDHB     |
| 9.67E-30 | 0 | UCHL1      |
| 1.06E-29 | 0 | FNDC3B     |
| 1.58E-29 | 0 | NAV1       |
| 1.77E-29 | 0 | REXO2      |
| 3.38E-29 | 0 | CACNB2     |
| 4.09E-29 | 0 | DIAPH2-AS1 |
| 4.30E-29 | 0 | MAPK9      |
| 5.19E-29 | 0 | PTPN13     |
| 2.17E-28 | 0 | FAM171A1   |
| 2.20E-28 | 0 | EYA4       |
| 2.50E-28 | 0 | DUSP1      |
| 4.73E-28 | 0 | DSE        |
| 6.02E-28 | 0 | LINC01504  |
| 8.26E-28 | 0 | LAPTM4A    |

|          |   |            |
|----------|---|------------|
| 1.56E-27 | 0 | CCDC18-AS1 |
| 1.82E-27 | 0 | LRIG3      |
| 3.41E-27 | 0 | G0S2       |
| 4.03E-27 | 0 | DENND4C    |
| 4.47E-27 | 0 | IL6        |
| 4.61E-27 | 0 | AC004160.1 |
| 4.70E-27 | 0 | CMYA5      |
| 5.39E-27 | 0 | SLC4A7     |
| 5.42E-27 | 0 | UTY        |
| 6.66E-27 | 0 | ARHGEF10   |
| 7.60E-27 | 0 | PPM1B      |
| 7.85E-27 | 0 | STIM1      |
| 1.11E-26 | 0 | TRMT11     |
| 1.48E-26 | 0 | RAD51B     |
| 1.81E-26 | 0 | BBS9       |
| 1.84E-26 | 0 | RIN2       |
| 2.24E-26 | 0 | PTGS2      |
| 2.25E-26 | 0 | SESN1      |
| 3.02E-26 | 0 | BDKRB1     |
| 3.27E-26 | 0 | ANKS1B     |
| 6.94E-26 | 0 | ANTXR2     |
| 7.96E-26 | 0 | NR2F1-AS1  |
| 8.46E-26 | 0 | RUFY3      |
| 9.55E-26 | 0 | HIBADH     |
| 1.34E-25 | 0 | ARID5B     |
| 1.50E-25 | 0 | GTF2B      |
| 2.08E-25 | 0 | LRRC23     |
| 2.59E-25 | 0 | HIPK3      |
| 3.03E-25 | 0 | MRTFA      |
| 4.93E-25 | 0 | STARD9     |
| 5.21E-25 | 0 | TRERF1     |
| 5.43E-25 | 0 | RFTN2      |
| 1.93E-24 | 0 | MID1       |
| 2.02E-24 | 0 | BAZ2B      |
| 4.78E-24 | 0 | NFKB1      |
| 5.33E-24 | 0 | SCAPER     |
| 5.65E-24 | 0 | PNISR      |
| 1.33E-23 | 0 | TXLNG      |
| 5.71E-23 | 0 | SLC10A1    |
| 6.32E-23 | 0 | MITF       |
| 6.87E-23 | 0 | ADAMTS17   |
| 1.02E-22 | 0 | ATP10D     |
| 1.16E-22 | 0 | SPRED2     |

|          |   |              |
|----------|---|--------------|
| 1.46E-22 | 0 | RORA-AS1     |
| 3.30E-22 | 0 | SMG6         |
| 4.21E-22 | 0 | FHOD3        |
| 4.50E-22 | 0 | LINC01473    |
| 6.77E-22 | 0 | FST          |
| 9.28E-22 | 0 | PRKCE        |
| 1.01E-21 | 0 | FNIP2        |
| 1.03E-21 | 0 | RSRP1        |
| 1.13E-21 | 0 | PDE1A        |
| 2.08E-21 | 0 | AC012404.1   |
| 2.57E-21 | 0 | SQSTM1       |
| 3.73E-21 | 0 | POLG2        |
| 4.70E-21 | 0 | B4GALT1      |
| 4.74E-21 | 0 | ADAMTSL4-AS1 |
| 6.23E-21 | 0 | ATF6         |
| 6.96E-21 | 0 | KDM3B        |
| 2.30E-20 | 0 | TTC17        |
| 2.31E-20 | 0 | WTAP         |
| 5.62E-20 | 0 | EIF1B        |
| 6.89E-20 | 0 | AC022217.3   |
| 1.44E-19 | 0 | TULP2        |
| 1.58E-19 | 0 | AL365295.1   |
| 2.68E-19 | 0 | ADM          |
| 5.56E-19 | 0 | PRKCG        |
| 6.21E-19 | 0 | PRICKLE2     |
| 6.93E-19 | 0 | ZC3HAV1      |
| 1.20E-18 | 0 | SLC9A1       |
| 1.21E-18 | 0 | SYN3         |
| 1.53E-18 | 0 | CAMK2N1      |
| 1.99E-18 | 0 | TAF4B        |
| 2.21E-18 | 0 | GALNT17      |
| 6.13E-18 | 0 | TSC22D2      |
| 1.89E-17 | 0 | SLC41A2      |
| 3.28E-17 | 0 | ZFP36L1      |
| 3.85E-17 | 0 | LHFPL2       |
| 4.12E-17 | 0 | GCH1         |
| 7.17E-17 | 0 | SMIM41       |
| 2.15E-16 | 0 | THBS1        |
| 2.65E-16 | 0 | DEPP1        |
| 2.66E-16 | 0 | ELL2         |
| 6.17E-16 | 0 | H19          |
| 6.18E-16 | 0 | THUMPD3-AS1  |
| 6.99E-16 | 0 | MMP19        |

|             |   |           |
|-------------|---|-----------|
| 7.53E-16    | 0 | CPE       |
| 1.58E-15    | 0 | NFATC1    |
| 5.69E-15    | 0 | PDE4D     |
| 1.09E-14    | 0 | CES1      |
| 3.28E-14    | 0 | CAMK2D    |
| 1.32E-13    | 0 | DPH6      |
| 1.47E-13    | 0 | AMPD3     |
| 2.30E-13    | 0 | HECTD2    |
| 4.54E-13    | 0 | SEMA4A    |
| 7.33E-13    | 0 | TNFRSF10B |
| 1.04E-12    | 0 | ULK4      |
| 8.00E-12    | 0 | BIN3      |
| 1.14E-11    | 0 | UGP2      |
| 1.74E-11    | 0 | CCN2      |
| 2.90E-11    | 0 | TNFAIP6   |
| 4.03E-11    | 0 | ABTB2     |
| 5.01E-11    | 0 | A2M       |
| 8.66E-11    | 0 | PTGDS     |
| 1.35E-10    | 0 | PLEKHG2   |
| 2.96E-10    | 0 | SLC39A14  |
| 4.39E-09    | 0 | SCLT1     |
| 1.27E-08    | 0 | TMTC2     |
| 8.03E-08    | 0 | SUPT5H    |
| 1.03E-07    | 0 | SLC25A44  |
| 3.16E-07    | 0 | GBE1      |
| 9.55E-07    | 0 | PMF1      |
| 3.97E-05    | 0 | RAB7A     |
| 6.22E-05    | 0 | ICAM1     |
| 0.000112801 | 0 | CXCL2     |
| 0.004194341 | 0 | ACSL4     |
| 0           | 1 | COL11A1   |
| 0           | 1 | COL1A1    |
| 0           | 1 | POSTN     |
| 0           | 1 | KIF26B    |
| 0           | 1 | INHBA     |
| 0           | 1 | COL5A1    |
| 0           | 1 | COL10A1   |
| 0           | 1 | WNT5A     |
| 0           | 1 | GREM1     |
| 0           | 1 | RUNX2     |
| 0           | 1 | CDH11     |
| 0           | 1 | SDC1      |
| 0           | 1 | PLPP4     |

|           |   |            |
|-----------|---|------------|
| 3.99E-302 | 1 | ADAM12     |
| 1.46E-301 | 1 | MMP11      |
| 3.22E-298 | 1 | TANC2      |
| 8.67E-295 | 1 | COL3A1     |
| 1.75E-294 | 1 | COL12A1    |
| 3.20E-293 | 1 | COL1A2     |
| 3.35E-289 | 1 | COL5A2     |
| 1.85E-288 | 1 | RAI14      |
| 1.77E-284 | 1 | TMEM158    |
| 4.26E-280 | 1 | PTK7       |
| 3.06E-275 | 1 | LOXL2      |
| 6.91E-273 | 1 | CTHRC1     |
| 1.43E-269 | 1 | TENM3      |
| 1.31E-264 | 1 | SUGCT      |
| 2.42E-259 | 1 | CSMD2      |
| 1.01E-257 | 1 | DSG2       |
| 1.59E-256 | 1 | MIR181A1HG |
| 2.52E-251 | 1 | UNC5B      |
| 7.11E-249 | 1 | CASC15     |
| 1.01E-247 | 1 | PRDM1      |
| 1.52E-245 | 1 | ADAMTS12   |
| 3.86E-244 | 1 | COL7A1     |
| 6.91E-244 | 1 | FAP        |
| 2.18E-243 | 1 | PODNL1     |
| 6.89E-243 | 1 | GJA1       |
| 9.69E-243 | 1 | SLC16A3    |
| 1.42E-242 | 1 | NXN        |
| 6.86E-241 | 1 | NREP       |
| 1.14E-238 | 1 | MME        |
| 1.74E-237 | 1 | HMGA2      |
| 2.13E-231 | 1 | CHST11     |
| 8.25E-230 | 1 | NTM        |
| 1.07E-229 | 1 | COL27A1    |
| 3.16E-229 | 1 | HS3ST3A1   |
| 1.88E-228 | 1 | LRRC15     |
| 1.83E-227 | 1 | COL6A3     |
| 1.31E-226 | 1 | RNF144A    |
| 8.82E-226 | 1 | ZNF469     |
| 2.70E-224 | 1 | NRP2       |
| 2.92E-224 | 1 | THBS2      |
| 2.70E-217 | 1 | SLC24A2    |
| 1.86E-216 | 1 | RUNX1      |
| 1.60E-211 | 1 | MMP14      |

|           |   |           |
|-----------|---|-----------|
| 2.26E-208 | 1 | GALNT5    |
| 4.50E-206 | 1 | FN1       |
| 1.16E-203 | 1 | ANTXR1    |
| 2.15E-203 | 1 | HECW1     |
| 2.61E-203 | 1 | MICAL2    |
| 1.64E-202 | 1 | LINC01429 |
| 2.75E-202 | 1 | DCBLD1    |
| 3.08E-200 | 1 | LINC01705 |
| 1.16E-199 | 1 | CHN1      |
| 9.83E-199 | 1 | FARP1     |
| 2.10E-195 | 1 | SERPINH1  |
| 3.77E-193 | 1 | APBA2     |
| 9.35E-193 | 1 | CNN2      |
| 9.72E-191 | 1 | VCAN      |
| 1.96E-189 | 1 | CCN4      |
| 4.54E-188 | 1 | GOLM1     |
| 6.08E-187 | 1 | MARCKS    |
| 1.37E-185 | 1 | LMO7      |
| 9.52E-183 | 1 | CDC42EP3  |
| 2.16E-182 | 1 | ARL4C     |
| 7.61E-182 | 1 | TSPAN5    |
| 3.63E-181 | 1 | LMCD1     |
| 6.40E-181 | 1 | PMEPA1    |
| 3.57E-180 | 1 | DIO2      |
| 1.47E-179 | 1 | SPHK1     |
| 1.88E-179 | 1 | SPARC     |
| 1.16E-178 | 1 | SPATS2L   |
| 1.60E-176 | 1 | C1QTNF6   |
| 3.21E-175 | 1 | CDH2      |
| 2.70E-174 | 1 | FSCN1     |
| 3.58E-174 | 1 | IL7R      |
| 1.13E-173 | 1 | CADM1     |
| 1.32E-173 | 1 | PDGFC     |
| 2.39E-170 | 1 | GPR176    |
| 2.42E-170 | 1 | NETO1     |
| 4.29E-170 | 1 | BASP1     |
| 4.87E-170 | 1 | MFAP2     |
| 1.59E-169 | 1 | PTPRE     |
| 1.16E-168 | 1 | COL6A1    |
| 2.83E-167 | 1 | RFX8      |
| 3.73E-167 | 1 | ACTN1     |
| 2.03E-165 | 1 | SOX4      |
| 1.38E-164 | 1 | HHIP      |

|           |   |           |
|-----------|---|-----------|
| 2.74E-164 | 1 | PLOD2     |
| 3.79E-164 | 1 | GJB2      |
| 7.69E-163 | 1 | ADAMTS14  |
| 8.57E-163 | 1 | TANC1     |
| 6.43E-161 | 1 | CHST15    |
| 1.08E-160 | 1 | ADAMTS2   |
| 5.64E-160 | 1 | GLIS3     |
| 9.07E-160 | 1 | ALPK2     |
| 1.40E-159 | 1 | EGFL6     |
| 2.47E-159 | 1 | TGFBI     |
| 1.18E-158 | 1 | MYO10     |
| 1.38E-157 | 1 | PPFIBP1   |
| 2.45E-157 | 1 | SPATA13   |
| 1.36E-156 | 1 | CALU      |
| 1.91E-156 | 1 | MMP1      |
| 1.98E-154 | 1 | LINC00511 |
| 9.28E-154 | 1 | RCN3      |
| 2.64E-153 | 1 | LINC01929 |
| 4.27E-153 | 1 | KIAA1217  |
| 8.21E-153 | 1 | ENTPD7    |
| 1.22E-151 | 1 | GPM6B     |
| 4.22E-150 | 1 | MYH9      |
| 5.22E-150 | 1 | STK17B    |
| 7.35E-149 | 1 | TCF4      |
| 7.94E-149 | 1 | SULF2     |
| 1.02E-148 | 1 | SULF1     |
| 1.74E-147 | 1 | AOPEP     |
| 2.25E-147 | 1 | PLAU      |
| 2.88E-147 | 1 | MMP13     |
| 1.57E-146 | 1 | ITGB5     |
| 4.12E-145 | 1 | VSNL1     |
| 4.93E-145 | 1 | PYCR1     |
| 1.08E-144 | 1 | EPST11    |
| 1.78E-144 | 1 | TTYH3     |
| 6.27E-144 | 1 | SYNDIG1   |
| 1.08E-141 | 1 | CD82      |
| 5.62E-141 | 1 | ADAM19    |
| 7.47E-141 | 1 | TSPAN9    |
| 2.13E-139 | 1 | LEF1      |
| 1.07E-138 | 1 | SERINC2   |
| 4.61E-138 | 1 | SHISA2    |
| 5.01E-137 | 1 | P3H1      |
| 6.47E-137 | 1 | TPST2     |



|           |   |            |
|-----------|---|------------|
| 7.93E-137 | 1 | PALLD      |
| 1.09E-136 | 1 | CREB3L1    |
| 1.72E-136 | 1 | RRBP1      |
| 4.88E-136 | 1 | AC134312.5 |
| 1.27E-135 | 1 | AEBP1      |
| 1.79E-135 | 1 | CMTM4      |
| 1.89E-135 | 1 | MXRA5      |
| 9.27E-135 | 1 | COL24A1    |
| 1.43E-134 | 1 | FGD6       |
| 1.81E-134 | 1 | GSE1       |
| 2.27E-134 | 1 | SEZ6L2     |
| 5.54E-134 | 1 | FKBP10     |
| 1.02E-133 | 1 | WNT2       |
| 2.39E-133 | 1 | CHSY3      |
| 7.22E-133 | 1 | CALD1      |
| 2.89E-132 | 1 | MARCKSL1   |
| 1.06E-131 | 1 | MDFI       |
| 1.75E-130 | 1 | C4orf48    |
| 2.97E-130 | 1 | RAB31      |
| 3.86E-130 | 1 | TRIM59     |
| 7.79E-130 | 1 | SIPA1L1    |
| 1.72E-129 | 1 | SLC1A3     |
| 7.90E-129 | 1 | PMAIP1     |
| 2.71E-127 | 1 | RGS3       |
| 2.84E-127 | 1 | NKD1       |
| 7.10E-127 | 1 | KIFC3      |
| 7.47E-127 | 1 | TENM4      |
| 7.61E-127 | 1 | TMEM45A    |
| 7.99E-126 | 1 | ATXN1      |
| 2.60E-125 | 1 | CHPF       |
| 4.53E-125 | 1 | CAPZB      |
| 6.66E-125 | 1 | PRKD1      |
| 7.96E-125 | 1 | P3H4       |
| 1.01E-124 | 1 | GLIS1      |
| 4.23E-124 | 1 | FNBP1L     |
| 4.80E-124 | 1 | NRG1       |
| 8.25E-124 | 1 | CDCP1      |
| 3.18E-123 | 1 | NUAK1      |
| 2.88E-122 | 1 | SGIP1      |
| 3.22E-122 | 1 | SEPTIN11   |
| 1.96E-120 | 1 | TNFRSF12A  |
| 2.98E-120 | 1 | TEAD1      |
| 1.27E-119 | 1 | HOPX       |

|           |   |            |
|-----------|---|------------|
| 2.78E-119 | 1 | ENAH       |
| 3.46E-119 | 1 | ASAP1      |
| 3.29E-118 | 1 | TRIO       |
| 2.37E-117 | 1 | AK5        |
| 3.08E-117 | 1 | DERL3      |
| 3.13E-117 | 1 | BPGM       |
| 7.49E-116 | 1 | RALA       |
| 2.37E-115 | 1 | FRMD6      |
| 7.54E-115 | 1 | CTSB       |
| 1.89E-114 | 1 | HMGA2-AS1  |
| 2.49E-114 | 1 | MAP4K4     |
| 4.15E-114 | 1 | ZNF281     |
| 9.03E-114 | 1 | WIPF1      |
| 1.66E-113 | 1 | ACBD3      |
| 1.88E-113 | 1 | BMP1       |
| 1.90E-113 | 1 | XYLT1      |
| 2.13E-113 | 1 | SLC38A5    |
| 2.58E-113 | 1 | COL5A3     |
| 3.31E-113 | 1 | LIMS1      |
| 5.12E-113 | 1 | ZEB1       |
| 6.10E-113 | 1 | PLOD1      |
| 9.63E-113 | 1 | NKD2       |
| 1.37E-112 | 1 | FRMD5      |
| 2.80E-112 | 1 | RASGRF2    |
| 3.48E-112 | 1 | CDK14      |
| 5.72E-112 | 1 | PGM2L1     |
| 2.89E-111 | 1 | GRIP1      |
| 1.09E-110 | 1 | LOX        |
| 1.32E-110 | 1 | PTGER3     |
| 1.45E-110 | 1 | SPRED1     |
| 2.28E-110 | 1 | BGN        |
| 5.57E-110 | 1 | VGLL4      |
| 6.19E-110 | 1 | TWIST1     |
| 2.77E-109 | 1 | ST6GALNAC5 |
| 7.42E-109 | 1 | GPX7       |
| 1.48E-108 | 1 | APBB2      |
| 1.49E-108 | 1 | STMN1      |
| 1.27E-107 | 1 | STARD4-AS1 |
| 1.49E-107 | 1 | FUT8       |
| 5.19E-107 | 1 | PRRX1      |
| 1.36E-106 | 1 | PDPN       |
| 1.73E-106 | 1 | NRIP1      |
| 2.95E-106 | 1 | TNFRSF6B   |

|           |   |             |
|-----------|---|-------------|
| 8.66E-106 | 1 | ETV1        |
| 1.06E-105 | 1 | SLC6A6      |
| 1.18E-105 | 1 | P4HB        |
| 1.35E-105 | 1 | JCAD        |
| 1.95E-105 | 1 | AC015923.1  |
| 3.27E-105 | 1 | CDYL2       |
| 1.16E-104 | 1 | EVA1A       |
| 1.44E-104 | 1 | MDFIC       |
| 1.51E-104 | 1 | RCN1        |
| 6.79E-104 | 1 | KCND2       |
| 9.23E-104 | 1 | STRA6       |
| 1.30E-103 | 1 | SEC31A      |
| 1.34E-103 | 1 | ITGB1       |
| 2.16E-103 | 1 | CCBE1       |
| 2.67E-103 | 1 | SPECC1      |
| 5.74E-103 | 1 | FOXQ1       |
| 1.01E-102 | 1 | MIR4435-2HG |
| 2.12E-102 | 1 | PCDH7       |
| 2.50E-102 | 1 | SLC9A3R2    |
| 1.32E-101 | 1 | CD109       |
| 1.42E-101 | 1 | EMILIN1     |
| 1.65E-101 | 1 | ETV6        |
| 1.69E-101 | 1 | TPM4        |
| 2.91E-101 | 1 | SURF4       |
| 6.51E-101 | 1 | MSX2        |
| 1.20E-100 | 1 | COL8A1      |
| 1.74E-100 | 1 | MYO5A       |
| 2.08E-99  | 1 | RAB2A       |
| 4.20E-99  | 1 | SIPA1L3     |
| 4.80E-99  | 1 | AGPAT4      |
| 1.40E-98  | 1 | MCC         |
| 5.83E-98  | 1 | VOPP1       |
| 1.66E-97  | 1 | ARMC9       |
| 3.30E-97  | 1 | DCBLD2      |
| 1.06E-96  | 1 | S100A16     |
| 1.10E-96  | 1 | LINC00632   |
| 3.93E-96  | 1 | TMEM132A    |
| 4.00E-96  | 1 | SLC24A3     |
| 5.77E-96  | 1 | COL6A6      |
| 6.95E-96  | 1 | TCF12       |
| 1.49E-95  | 1 | TMEM200A    |
| 5.21E-95  | 1 | NEK6        |
| 5.35E-95  | 1 | SHB         |

|          |   |            |
|----------|---|------------|
| 2.70E-94 | 1 | GBP1       |
| 3.20E-94 | 1 | MYO1B      |
| 3.52E-94 | 1 | TYMP       |
| 3.75E-94 | 1 | LMAN1      |
| 4.11E-94 | 1 | IDH2       |
| 4.94E-94 | 1 | ZNF608     |
| 5.12E-94 | 1 | NID2       |
| 5.17E-94 | 1 | ST5        |
| 6.38E-94 | 1 | LGALS1     |
| 9.87E-94 | 1 | FNDC1      |
| 2.54E-93 | 1 | LUZP1      |
| 4.53E-93 | 1 | ITGAV      |
| 9.39E-93 | 1 | GOLT1B     |
| 1.07E-92 | 1 | HS3ST3B1   |
| 1.41E-92 | 1 | NCOR2      |
| 2.30E-92 | 1 | KLHL5      |
| 2.73E-92 | 1 | EDIL3      |
| 5.83E-92 | 1 | P4HA3      |
| 7.19E-92 | 1 | DIP2C      |
| 8.37E-92 | 1 | ROBO1      |
| 1.69E-91 | 1 | GUCY1A1    |
| 1.81E-91 | 1 | MMD        |
| 2.02E-91 | 1 | BX284613.2 |
| 2.81E-91 | 1 | TMEM263    |
| 3.10E-91 | 1 | GFPT1      |
| 6.01E-91 | 1 | PTPN14     |
| 9.54E-91 | 1 | CTSK       |
| 1.44E-90 | 1 | PLAUR      |
| 2.84E-90 | 1 | C1orf198   |
| 3.12E-90 | 1 | HHIP-AS1   |
| 7.57E-90 | 1 | TOM1       |
| 1.06E-89 | 1 | CMTM8      |
| 1.20E-89 | 1 | OSTC       |
| 1.59E-89 | 1 | ARSI       |
| 7.58E-89 | 1 | THY1       |
| 7.73E-89 | 1 | ROR2       |
| 1.25E-88 | 1 | WHRN       |
| 1.32E-88 | 1 | CD276      |
| 1.60E-88 | 1 | GPC6       |
| 1.88E-87 | 1 | MAFB       |
| 2.17E-87 | 1 | PAWR       |
| 3.05E-87 | 1 | STAT2      |
| 8.96E-87 | 1 | DUSP10     |

|          |   |          |
|----------|---|----------|
| 1.26E-86 | 1 | MALT1    |
| 2.32E-86 | 1 | SSR3     |
| 2.41E-86 | 1 | HS2ST1   |
| 3.57E-86 | 1 | TTC39B   |
| 6.65E-86 | 1 | IKBIP    |
| 6.85E-86 | 1 | TMEFF1   |
| 2.10E-85 | 1 | KDELR3   |
| 6.45E-85 | 1 | DGKI     |
| 9.57E-85 | 1 | P4HA1    |
| 2.79E-84 | 1 | PARVA    |
| 7.39E-84 | 1 | COL6A2   |
| 1.37E-83 | 1 | ANKLE2   |
| 1.93E-83 | 1 | SEC61A1  |
| 3.54E-83 | 1 | ID1      |
| 4.37E-83 | 1 | ZFAND3   |
| 9.07E-83 | 1 | ENPP1    |
| 1.31E-82 | 1 | ANKRD28  |
| 1.65E-82 | 1 | DSEL     |
| 4.53E-82 | 1 | HDLBP    |
| 4.82E-82 | 1 | SYTL2    |
| 8.88E-82 | 1 | MAGED1   |
| 1.58E-81 | 1 | NECTIN2  |
| 3.29E-81 | 1 | HLA-B    |
| 3.31E-81 | 1 | CERCAM   |
| 5.57E-81 | 1 | DOCK5    |
| 7.49E-81 | 1 | CEMIP2   |
| 1.44E-80 | 1 | STXBP5   |
| 4.40E-80 | 1 | TTC3     |
| 7.23E-80 | 1 | OTULINL  |
| 1.05E-79 | 1 | BCAR1    |
| 1.45E-79 | 1 | CKAP4    |
| 2.53E-79 | 1 | SPON2    |
| 3.21E-79 | 1 | FAM114A1 |
| 3.22E-79 | 1 | ZNF521   |
| 4.86E-79 | 1 | DKK3     |
| 1.14E-78 | 1 | NEDD4    |
| 1.29E-78 | 1 | SMCO4    |
| 1.72E-78 | 1 | CPXM1    |
| 2.21E-78 | 1 | GOPC     |
| 2.94E-78 | 1 | PTBP3    |
| 5.77E-78 | 1 | MYH10    |
| 6.03E-78 | 1 | ABCC4    |
| 1.07E-77 | 1 | RGS17    |

|          |   |            |
|----------|---|------------|
| 1.21E-77 | 1 | OSBPL3     |
| 8.80E-77 | 1 | TAFA5      |
| 9.31E-77 | 1 | YAP1       |
| 1.68E-76 | 1 | TNC        |
| 1.95E-76 | 1 | TUT7       |
| 2.26E-76 | 1 | DPY19L1    |
| 2.95E-76 | 1 | PRRC1      |
| 3.59E-76 | 1 | KDEL2      |
| 3.74E-76 | 1 | CSGALNACT2 |
| 5.07E-76 | 1 | ETS1       |
| 8.15E-76 | 1 | ITGA4      |
| 9.33E-76 | 1 | ITGA5      |
| 1.13E-75 | 1 | SHC1       |
| 1.47E-75 | 1 | CDH13      |
| 1.49E-75 | 1 | TMEM208    |
| 1.63E-75 | 1 | MOB1B      |
| 1.81E-75 | 1 | PDXDC1     |
| 3.16E-75 | 1 | RANBP17    |
| 3.68E-75 | 1 | SH3BP4     |
| 3.87E-75 | 1 | SEMA3A     |
| 5.43E-75 | 1 | WWC2       |
| 6.63E-75 | 1 | SH3RF3     |
| 1.85E-74 | 1 | PDLIM2     |
| 2.45E-74 | 1 | REEP3      |
| 2.75E-74 | 1 | MYDGF      |
| 3.19E-74 | 1 | C2orf27A   |
| 3.27E-74 | 1 | PIIB       |
| 4.55E-74 | 1 | FZD6       |
| 6.23E-74 | 1 | VMP1       |
| 6.29E-74 | 1 | TMEM167A   |
| 6.59E-74 | 1 | ABL2       |
| 1.25E-73 | 1 | KDM5B      |
| 1.58E-73 | 1 | AFAP1      |
| 2.70E-73 | 1 | SSH1       |
| 3.73E-73 | 1 | EDNRA      |
| 4.70E-73 | 1 | NHSL1      |
| 5.16E-73 | 1 | PKM        |
| 1.84E-72 | 1 | ISG15      |
| 4.19E-72 | 1 | LRRC17     |
| 4.35E-72 | 1 | BNC2       |
| 4.64E-72 | 1 | EVA1B      |
| 5.01E-72 | 1 | LAMB1      |
| 5.50E-72 | 1 | AC083870.1 |

|          |   |          |
|----------|---|----------|
| 6.10E-72 | 1 | DDAH1    |
| 6.90E-72 | 1 | SGPL1    |
| 7.41E-72 | 1 | TUBB3    |
| 1.01E-71 | 1 | MSANTD3  |
| 1.03E-71 | 1 | SMYD3    |
| 1.10E-71 | 1 | TAOK3    |
| 1.26E-71 | 1 | SERINC5  |
| 1.27E-71 | 1 | ITGA11   |
| 1.60E-71 | 1 | ZNF827   |
| 2.27E-71 | 1 | ACTR3    |
| 2.39E-71 | 1 | SEC23A   |
| 2.60E-71 | 1 | NPAS2    |
| 2.76E-71 | 1 | IGF2BP2  |
| 4.34E-71 | 1 | IRS1     |
| 4.63E-71 | 1 | BICC1    |
| 7.22E-71 | 1 | HAPLN3   |
| 1.11E-70 | 1 | MEIS3    |
| 1.16E-70 | 1 | OLFML2B  |
| 1.67E-70 | 1 | NCAM2    |
| 1.68E-70 | 1 | B4GALT2  |
| 1.92E-70 | 1 | FBLIM1   |
| 2.20E-70 | 1 | ATP2C1   |
| 2.49E-70 | 1 | SEMA5A   |
| 3.29E-70 | 1 | IL32     |
| 3.65E-70 | 1 | HOMER3   |
| 3.69E-70 | 1 | METRN    |
| 5.55E-70 | 1 | NRXN3    |
| 8.85E-70 | 1 | GNAI1    |
| 9.00E-70 | 1 | PLEKHO1  |
| 1.28E-69 | 1 | MBOAT2   |
| 1.35E-69 | 1 | FAT1     |
| 3.60E-69 | 1 | PHTF2    |
| 4.07E-69 | 1 | CLMP     |
| 4.97E-69 | 1 | SRPK2    |
| 5.60E-69 | 1 | NT5DC2   |
| 6.20E-69 | 1 | TAP1     |
| 7.15E-69 | 1 | CHORDC1  |
| 7.81E-69 | 1 | TXNDC17  |
| 1.01E-68 | 1 | DIO2-AS1 |
| 1.93E-68 | 1 | SLC39A13 |
| 3.55E-68 | 1 | ADGRA3   |
| 3.64E-68 | 1 | ALDH18A1 |
| 1.07E-67 | 1 | FMN1     |

|          |   |          |
|----------|---|----------|
| 1.30E-67 | 1 | LRP12    |
| 2.48E-67 | 1 | WDR27    |
| 6.86E-67 | 1 | FRS2     |
| 8.38E-67 | 1 | XAF1     |
| 1.04E-66 | 1 | ITPRIP   |
| 1.16E-66 | 1 | MIB1     |
| 1.56E-66 | 1 | SH3PXD2B |
| 1.57E-66 | 1 | JPT1     |
| 1.81E-66 | 1 | COLGALT1 |
| 2.62E-66 | 1 | TNS3     |
| 3.82E-66 | 1 | CLIP2    |
| 4.72E-66 | 1 | PTTG1IP  |
| 5.58E-66 | 1 | ARHGAP18 |
| 6.91E-66 | 1 | SMARCB1  |
| 1.01E-65 | 1 | OXSRI    |
| 1.06E-65 | 1 | RSAD2    |
| 1.42E-65 | 1 | CLEC11A  |
| 1.56E-65 | 1 | CLIC4    |
| 4.70E-65 | 1 | MSRB3    |
| 4.75E-65 | 1 | SLC5A3   |
| 4.78E-65 | 1 | FOXP1    |
| 5.62E-65 | 1 | ZNF532   |
| 5.83E-65 | 1 | RAB27A   |
| 8.75E-65 | 1 | UBTD1    |
| 1.09E-64 | 1 | NORAD    |
| 1.41E-64 | 1 | SNX25    |
| 1.42E-64 | 1 | SH3PXD2A |
| 1.51E-64 | 1 | ROBO2    |
| 1.57E-64 | 1 | RASAL2   |
| 1.91E-64 | 1 | ARFGAP3  |
| 1.92E-64 | 1 | RGS4     |
| 2.09E-64 | 1 | FKBP14   |
| 3.22E-64 | 1 | C16orf87 |
| 3.62E-64 | 1 | AVEN     |
| 5.91E-64 | 1 | ADAMTS6  |
| 8.18E-64 | 1 | PRKG1    |
| 1.64E-63 | 1 | MCTP2    |
| 2.06E-63 | 1 | SCARF2   |
| 5.94E-63 | 1 | SMARCC1  |
| 6.06E-63 | 1 | COTL1    |
| 2.24E-62 | 1 | SPATS2   |
| 2.26E-62 | 1 | IPMK     |
| 3.06E-62 | 1 | UBE2Q2   |



|          |   |          |
|----------|---|----------|
| 3.40E-62 | 1 | ODF2L    |
| 3.61E-62 | 1 | PDLIM3   |
| 4.17E-62 | 1 | STK17A   |
| 4.40E-62 | 1 | NEAT1    |
| 6.14E-62 | 1 | TLN2     |
| 6.45E-62 | 1 | ACVR1    |
| 8.36E-62 | 1 | SEC24D   |
| 9.91E-62 | 1 | FMNL3    |
| 1.55E-61 | 1 | PPP4R1   |
| 1.81E-61 | 1 | KCNQ1OT1 |
| 1.89E-61 | 1 | PELI1    |
| 1.99E-61 | 1 | ABRACL   |
| 2.46E-61 | 1 | STK10    |
| 3.30E-61 | 1 | BCAT1    |
| 3.54E-61 | 1 | RIN2     |
| 4.25E-61 | 1 | USP32    |
| 4.53E-61 | 1 | SGCD     |
| 6.15E-61 | 1 | PRR5     |
| 7.07E-61 | 1 | C17orf49 |
| 7.57E-61 | 1 | SLC39A7  |
| 8.59E-61 | 1 | SUPT3H   |
| 1.03E-60 | 1 | CD2AP    |
| 1.18E-60 | 1 | HTRA1    |
| 4.69E-60 | 1 | ISLR     |
| 5.44E-60 | 1 | RABAC1   |
| 6.43E-60 | 1 | MMP2     |
| 6.64E-60 | 1 | PSD3     |
| 9.95E-60 | 1 | TMED9    |
| 1.16E-59 | 1 | ARHGAP32 |
| 1.32E-59 | 1 | CACNA2D3 |
| 2.25E-59 | 1 | BAX      |
| 3.52E-59 | 1 | ANGPTL2  |
| 3.69E-59 | 1 | TSHZ3    |
| 3.82E-59 | 1 | CYTOR    |
| 4.43E-59 | 1 | HIVEP3   |
| 4.48E-59 | 1 | NDUFC2   |
| 5.48E-59 | 1 | GPX8     |
| 6.22E-59 | 1 | PLIN3    |
| 6.34E-59 | 1 | MAPK6    |
| 6.44E-59 | 1 | LRRC59   |
| 1.32E-58 | 1 | TIMP2    |
| 1.78E-58 | 1 | PRRX2    |
| 1.99E-58 | 1 | TBC1D23  |

|          |   |            |
|----------|---|------------|
| 2.06E-58 | 1 | DPP4       |
| 2.13E-58 | 1 | MIRLET7BHG |
| 1.02E-57 | 1 | MGAT5      |
| 1.05E-57 | 1 | SND1       |
| 1.44E-57 | 1 | GORASP2    |
| 1.53E-57 | 1 | RCC2       |
| 1.71E-57 | 1 | PMM2       |
| 1.92E-57 | 1 | SMIM3      |
| 2.95E-57 | 1 | ARHGAP31   |
| 3.46E-57 | 1 | EVL        |
| 3.53E-57 | 1 | ARFGAP1    |
| 3.83E-57 | 1 | ARF4       |
| 3.95E-57 | 1 | TDRP       |
| 7.47E-57 | 1 | CASK       |
| 1.01E-56 | 1 | GNB4       |
| 1.23E-56 | 1 | COPA       |
| 1.26E-56 | 1 | GOLGA3     |
| 1.37E-56 | 1 | CTTNBP2NL  |
| 2.46E-56 | 1 | TARSL2     |
| 2.94E-56 | 1 | USPL1      |
| 5.35E-56 | 1 | MAP3K4     |
| 5.82E-56 | 1 | MARVELD1   |
| 6.04E-56 | 1 | SQLE       |
| 6.57E-56 | 1 | LRRC1      |
| 8.89E-56 | 1 | PAPSS1     |
| 1.12E-55 | 1 | ACTR2      |
| 2.28E-55 | 1 | CEMIP      |
| 2.35E-55 | 1 | LIMK2      |
| 2.91E-55 | 1 | GNB1       |
| 3.23E-55 | 1 | AC004160.1 |
| 3.40E-55 | 1 | PPFIA2     |
| 3.51E-55 | 1 | KIAA1211   |
| 3.79E-55 | 1 | CHI3L1     |
| 4.17E-55 | 1 | AP000331.1 |
| 6.19E-55 | 1 | PDIA5      |
| 8.86E-55 | 1 | MYO6       |
| 1.01E-54 | 1 | MIR193BHG  |
| 1.01E-54 | 1 | YWHAG      |
| 1.07E-54 | 1 | LMCD1-AS1  |
| 1.56E-54 | 1 | EIF4E2     |
| 1.74E-54 | 1 | PHF20L1    |
| 1.96E-54 | 1 | ATP6V0B    |
| 2.63E-54 | 1 | KLF6       |

|          |   |          |
|----------|---|----------|
| 2.68E-54 | 1 | IFI30    |
| 3.76E-54 | 1 | ZNF609   |
| 8.67E-54 | 1 | ITSN1    |
| 9.86E-54 | 1 | UQCC2    |
| 1.08E-53 | 1 | NEK7     |
| 1.27E-53 | 1 | PLXNB2   |
| 1.54E-53 | 1 | MDK      |
| 1.64E-53 | 1 | SNX8     |
| 2.38E-53 | 1 | SOAT1    |
| 3.00E-53 | 1 | SEC24A   |
| 3.39E-53 | 1 | RNF150   |
| 3.41E-53 | 1 | TRPS1    |
| 3.91E-53 | 1 | RAPGEF2  |
| 4.14E-53 | 1 | AP2S1    |
| 4.29E-53 | 1 | PGM3     |
| 4.65E-53 | 1 | MYO9B    |
| 6.55E-53 | 1 | SMAD1    |
| 6.69E-53 | 1 | ERBIN    |
| 8.00E-53 | 1 | TNFRSF19 |
| 1.19E-52 | 1 | PRDX4    |
| 2.26E-52 | 1 | UBA6     |
| 2.45E-52 | 1 | TVP23C   |
| 5.33E-52 | 1 | AAK1     |
| 5.63E-52 | 1 | HEPH     |
| 7.12E-52 | 1 | EIF4G3   |
| 7.89E-52 | 1 | UHRF2    |
| 1.19E-51 | 1 | CACNA1C  |
| 1.41E-51 | 1 | CDK2AP1  |
| 1.58E-51 | 1 | SPIRE1   |
| 3.85E-51 | 1 | PAK2     |
| 3.87E-51 | 1 | EFNB2    |
| 4.49E-51 | 1 | PHC2     |
| 4.92E-51 | 1 | CTSZ     |
| 7.00E-51 | 1 | TBX3     |
| 8.40E-51 | 1 | KIFAP3   |
| 9.72E-51 | 1 | IGF1R    |
| 1.25E-50 | 1 | MAPK8    |
| 1.29E-50 | 1 | PSTPIP2  |
| 1.51E-50 | 1 | EIF2AK4  |
| 2.05E-50 | 1 | TMEM87B  |
| 4.71E-50 | 1 | SPTY2D1  |
| 6.20E-50 | 1 | ZDHHC20  |
| 6.24E-50 | 1 | XPR1     |

|          |   |            |
|----------|---|------------|
| 6.76E-50 | 1 | FNDC3B     |
| 7.00E-50 | 1 | GOLGA2     |
| 9.81E-50 | 1 | CMIP       |
| 1.88E-49 | 1 | BMP2       |
| 1.88E-49 | 1 | PDLIM5     |
| 1.94E-49 | 1 | KIF5B      |
| 2.30E-49 | 1 | TBC1D9     |
| 2.44E-49 | 1 | LPGAT1     |
| 2.49E-49 | 1 | CORO1C     |
| 2.55E-49 | 1 | CPEB4      |
| 2.76E-49 | 1 | PSME4      |
| 3.03E-49 | 1 | CNIH3      |
| 3.20E-49 | 1 | NBL1       |
| 3.41E-49 | 1 | CRABP2     |
| 4.50E-49 | 1 | TGFB1I1    |
| 4.52E-49 | 1 | NIBAN2     |
| 7.51E-49 | 1 | PLEC       |
| 7.69E-49 | 1 | RAB1A      |
| 7.73E-49 | 1 | PDXK       |
| 7.96E-49 | 1 | AC017002.5 |
| 1.08E-48 | 1 | ARHGAP28   |
| 1.08E-48 | 1 | CMTM3      |
| 1.20E-48 | 1 | MYO1E      |
| 1.51E-48 | 1 | GALNT10    |
| 1.94E-48 | 1 | DAPK3      |
| 3.81E-48 | 1 | ADAR       |
| 4.33E-48 | 1 | RARS       |
| 4.88E-48 | 1 | PXDN       |
| 5.05E-48 | 1 | ENO1       |
| 6.00E-48 | 1 | ARNTL2     |
| 6.06E-48 | 1 | PDE4D      |
| 6.16E-48 | 1 | TXNDC5     |
| 7.10E-48 | 1 | GPC1       |
| 7.27E-48 | 1 | NANS       |
| 7.86E-48 | 1 | RELB       |
| 1.04E-47 | 1 | COPB2      |
| 1.30E-47 | 1 | ITGA1      |
| 1.32E-47 | 1 | TP53I13    |
| 1.47E-47 | 1 | PRR16      |
| 1.55E-47 | 1 | P3H3       |
| 2.83E-47 | 1 | CLTC       |
| 2.99E-47 | 1 | COL8A2     |
| 3.09E-47 | 1 | PPP1R14B   |

|          |   |          |
|----------|---|----------|
| 4.62E-47 | 1 | KIAA0930 |
| 5.28E-47 | 1 | CNTN1    |
| 5.45E-47 | 1 | WIPI1    |
| 6.16E-47 | 1 | RASA2    |
| 8.10E-47 | 1 | HIF1A    |
| 8.32E-47 | 1 | ABHD17B  |
| 3.44E-46 | 1 | GOLGA4   |
| 3.52E-46 | 1 | IBTK     |
| 4.51E-46 | 1 | STARD3NL |
| 4.52E-46 | 1 | PAPSS2   |
| 4.62E-46 | 1 | KIF13A   |
| 6.48E-46 | 1 | FKBP11   |
| 6.97E-46 | 1 | RANBP9   |
| 1.09E-45 | 1 | PACS1    |
| 1.10E-45 | 1 | SYNCRIP  |
| 1.32E-45 | 1 | YIF1A    |
| 1.38E-45 | 1 | CDKL5    |
| 1.85E-45 | 1 | PLK2     |
| 1.95E-45 | 1 | ATP6AP1L |
| 1.99E-45 | 1 | HOXB2    |
| 2.00E-45 | 1 | DYRK3    |
| 2.30E-45 | 1 | GPR173   |
| 2.46E-45 | 1 | SPCS3    |
| 3.30E-45 | 1 | PTPA     |
| 3.51E-45 | 1 | SRGAP2   |
| 4.68E-45 | 1 | IL1R1    |
| 4.81E-45 | 1 | OSBPL6   |
| 4.88E-45 | 1 | TES      |
| 5.33E-45 | 1 | CERS6    |
| 5.33E-45 | 1 | ISOC2    |
| 6.08E-45 | 1 | GBF1     |
| 6.47E-45 | 1 | ATP6V1A  |
| 7.09E-45 | 1 | VGLL3    |
| 7.45E-45 | 1 | SGK1     |
| 9.68E-45 | 1 | AFF4     |
| 1.15E-44 | 1 | VEZT     |
| 1.17E-44 | 1 | GOLIM4   |
| 1.18E-44 | 1 | SH3GLB1  |
| 1.47E-44 | 1 | IFFO2    |
| 1.64E-44 | 1 | ATP13A3  |
| 1.79E-44 | 1 | MAN2A1   |
| 2.55E-44 | 1 | CLSTN2   |
| 2.72E-44 | 1 | CBX3     |

|          |   |            |
|----------|---|------------|
| 4.72E-44 | 1 | NBPF15     |
| 7.90E-44 | 1 | YEATS2     |
| 1.15E-43 | 1 | PLOD3      |
| 1.24E-43 | 1 | PLEKHG1    |
| 1.42E-43 | 1 | PPIC       |
| 2.26E-43 | 1 | NUS1       |
| 3.09E-43 | 1 | TCEAL9     |
| 3.09E-43 | 1 | ARCN1      |
| 3.67E-43 | 1 | TUBA1C     |
| 3.87E-43 | 1 | DPYSL3     |
| 4.94E-43 | 1 | TMEM30A    |
| 5.46E-43 | 1 | MB21D2     |
| 5.60E-43 | 1 | RAP1GDS1   |
| 8.68E-43 | 1 | PERP       |
| 8.90E-43 | 1 | PRKCA      |
| 1.09E-42 | 1 | HAS2       |
| 1.29E-42 | 1 | FKBP9      |
| 2.10E-42 | 1 | STIP1      |
| 2.53E-42 | 1 | FHOD3      |
| 2.90E-42 | 1 | DAP        |
| 3.62E-42 | 1 | TMED3      |
| 3.72E-42 | 1 | TMSB10     |
| 4.01E-42 | 1 | TDG        |
| 6.52E-42 | 1 | FBXO32     |
| 6.96E-42 | 1 | EVC        |
| 7.05E-42 | 1 | BX322234.1 |
| 7.41E-42 | 1 | P4HA2      |
| 1.47E-41 | 1 | SMC6       |
| 1.88E-41 | 1 | NPC1       |
| 2.42E-41 | 1 | SLC39A6    |
| 2.93E-41 | 1 | ENC1       |
| 3.32E-41 | 1 | TPBG       |
| 4.01E-41 | 1 | RASSF8     |
| 5.52E-41 | 1 | COL16A1    |
| 5.64E-41 | 1 | PLD1       |
| 5.84E-41 | 1 | AP3B1      |
| 6.09E-41 | 1 | ERN1       |
| 6.91E-41 | 1 | USO1       |
| 9.07E-41 | 1 | ZCCHC14    |
| 1.10E-40 | 1 | SPTLC2     |
| 1.15E-40 | 1 | GUCY1A2    |
| 1.45E-40 | 1 | PHACTR1    |
| 1.71E-40 | 1 | SLC39A10   |

|          |   |          |
|----------|---|----------|
| 1.73E-40 | 1 | KDELR1   |
| 1.76E-40 | 1 | MRC2     |
| 1.86E-40 | 1 | LUM      |
| 2.74E-40 | 1 | C1orf122 |
| 3.35E-40 | 1 | SUCO     |
| 4.70E-40 | 1 | CSNK1G1  |
| 6.80E-40 | 1 | TLN1     |
| 7.31E-40 | 1 | BMT2     |
| 8.44E-40 | 1 | MAP4K5   |
| 8.91E-40 | 1 | ADAM10   |
| 1.39E-39 | 1 | CHSY1    |
| 1.43E-39 | 1 | STAT1    |
| 1.98E-39 | 1 | BST2     |
| 2.02E-39 | 1 | DRAM1    |
| 2.49E-39 | 1 | ZFAND2A  |
| 3.23E-39 | 1 | TBCEL    |
| 3.25E-39 | 1 | UBTD2    |
| 3.49E-39 | 1 | VCAM1    |
| 3.82E-39 | 1 | MSC-AS1  |
| 5.20E-39 | 1 | FZD1     |
| 6.10E-39 | 1 | SEC61G   |
| 6.12E-39 | 1 | TMF1     |
| 7.30E-39 | 1 | PLEKHA5  |
| 8.46E-39 | 1 | BCAR3    |
| 1.15E-38 | 1 | G2E3     |
| 1.22E-38 | 1 | UBE2H    |
| 1.63E-38 | 1 | TRAF3    |
| 1.84E-38 | 1 | KLHL2    |
| 2.21E-38 | 1 | MACF1    |
| 2.83E-38 | 1 | PTPN12   |
| 3.54E-38 | 1 | NAA50    |
| 3.80E-38 | 1 | LRMDA    |
| 4.06E-38 | 1 | TGFBR1   |
| 4.74E-38 | 1 | FOXO1    |
| 4.80E-38 | 1 | PRRC2C   |
| 5.23E-38 | 1 | ATG5     |
| 5.60E-38 | 1 | ARPC2    |
| 6.66E-38 | 1 | BABAM2   |
| 7.27E-38 | 1 | DESI2    |
| 7.39E-38 | 1 | PDGFRB   |
| 1.08E-37 | 1 | PTPRD    |
| 1.14E-37 | 1 | MXD1     |
| 1.72E-37 | 1 | SCD5     |

|          |   |             |
|----------|---|-------------|
| 1.75E-37 | 1 | AZIN1       |
| 2.14E-37 | 1 | LPIN2       |
| 2.48E-37 | 1 | TPI1        |
| 2.84E-37 | 1 | GNPTAB      |
| 3.52E-37 | 1 | NOX4        |
| 4.44E-37 | 1 | MCU         |
| 4.70E-37 | 1 | PTPRM       |
| 4.80E-37 | 1 | CDC42BPA    |
| 5.19E-37 | 1 | CAMSAP2     |
| 6.08E-37 | 1 | CAPG        |
| 6.48E-37 | 1 | IFI27       |
| 7.06E-37 | 1 | SNAP23      |
| 7.54E-37 | 1 | ARHGAP22    |
| 8.49E-37 | 1 | ZBED1       |
| 8.90E-37 | 1 | YES1        |
| 9.07E-37 | 1 | MIR222HG    |
| 1.30E-36 | 1 | KIAA0355    |
| 1.70E-36 | 1 | TMTC2       |
| 1.73E-36 | 1 | KDM2A       |
| 1.78E-36 | 1 | DNM1        |
| 2.35E-36 | 1 | QKI         |
| 2.41E-36 | 1 | DLG1        |
| 2.67E-36 | 1 | DOCK1       |
| 3.22E-36 | 1 | OLFM2       |
| 3.69E-36 | 1 | NCOA3       |
| 4.64E-36 | 1 | CTNND1      |
| 5.64E-36 | 1 | PPP2R3A     |
| 6.00E-36 | 1 | SPON1       |
| 6.89E-36 | 1 | ERO1A       |
| 7.92E-36 | 1 | MCRIP1      |
| 1.16E-35 | 1 | TM9SF3      |
| 1.69E-35 | 1 | LRIG1       |
| 2.96E-35 | 1 | MACROD2     |
| 4.24E-35 | 1 | YTHDF3      |
| 4.27E-35 | 1 | SMAD2       |
| 4.67E-35 | 1 | TMEM117     |
| 5.05E-35 | 1 | LRCH1       |
| 5.42E-35 | 1 | SUSD6       |
| 6.70E-35 | 1 | RARRES2     |
| 7.48E-35 | 1 | PALM2-AKAP2 |
| 1.14E-34 | 1 | RDX         |
| 1.33E-34 | 1 | PHACTR4     |
| 1.53E-34 | 1 | EFEMP2      |



|          |   |          |
|----------|---|----------|
| 1.53E-34 | 1 | ABHD3    |
| 1.78E-34 | 1 | COLEC12  |
| 1.94E-34 | 1 | PTK2     |
| 2.08E-34 | 1 | ZNF326   |
| 2.78E-34 | 1 | MX1      |
| 3.51E-34 | 1 | ATP11B   |
| 3.56E-34 | 1 | MAST2    |
| 4.24E-34 | 1 | RCN2     |
| 4.39E-34 | 1 | SEC61B   |
| 4.92E-34 | 1 | IL1RAP   |
| 5.44E-34 | 1 | NBAS     |
| 8.26E-34 | 1 | TPM1     |
| 1.29E-33 | 1 | NRBF2    |
| 1.50E-33 | 1 | SLAIN2   |
| 1.91E-33 | 1 | RAB6A    |
| 2.60E-33 | 1 | CUTA     |
| 3.99E-33 | 1 | STX6     |
| 4.53E-33 | 1 | VCL      |
| 7.16E-33 | 1 | PRICKLE2 |
| 8.45E-33 | 1 | PGAM1    |
| 9.76E-33 | 1 | MYL12A   |
| 1.04E-32 | 1 | BMPR1A   |
| 1.10E-32 | 1 | DHRXS    |
| 1.32E-32 | 1 | TLE4     |
| 1.37E-32 | 1 | BAMBI    |
| 1.93E-32 | 1 | PARP14   |
| 2.57E-32 | 1 | GLI3     |
| 2.76E-32 | 1 | DAB1     |
| 3.86E-32 | 1 | PCNX1    |
| 3.96E-32 | 1 | PICALM   |
| 3.96E-32 | 1 | JMJD1C   |
| 4.21E-32 | 1 | ITCH     |
| 4.40E-32 | 1 | CNN3     |
| 4.98E-32 | 1 | XPO1     |
| 5.11E-32 | 1 | MIF      |
| 6.51E-32 | 1 | MITF     |
| 7.21E-32 | 1 | KATNBL1  |
| 8.01E-32 | 1 | LCOR     |
| 8.37E-32 | 1 | FAM171B  |
| 9.49E-32 | 1 | FXR1     |
| 1.13E-31 | 1 | TMEM41B  |
| 1.15E-31 | 1 | STAM     |
| 1.17E-31 | 1 | GLS      |

|          |   |          |
|----------|---|----------|
| 1.23E-31 | 1 | PPP2R5E  |
| 1.38E-31 | 1 | PCOLCE   |
| 1.47E-31 | 1 | SLC44A1  |
| 1.66E-31 | 1 | DCLK2    |
| 1.96E-31 | 1 | PLA2R1   |
| 2.05E-31 | 1 | SYAP1    |
| 2.10E-31 | 1 | AMOTL1   |
| 2.38E-31 | 1 | ATF7IP   |
| 2.40E-31 | 1 | SCFD1    |
| 2.80E-31 | 1 | PTPN1    |
| 4.12E-31 | 1 | CACYBP   |
| 5.14E-31 | 1 | RYBP     |
| 5.61E-31 | 1 | PAFAH1B1 |
| 5.99E-31 | 1 | HMGCS1   |
| 6.08E-31 | 1 | ILK      |
| 6.77E-31 | 1 | SETD5    |
| 8.16E-31 | 1 | GSK3B    |
| 8.81E-31 | 1 | ARHGDI1  |
| 1.01E-30 | 1 | ZNF618   |
| 1.08E-30 | 1 | RGS16    |
| 1.24E-30 | 1 | RNF24    |
| 1.34E-30 | 1 | RARB     |
| 1.58E-30 | 1 | CSNK1G3  |
| 1.62E-30 | 1 | MINDY2   |
| 1.66E-30 | 1 | MARK3    |
| 1.70E-30 | 1 | RAP1B    |
| 1.99E-30 | 1 | RNF149   |
| 4.31E-30 | 1 | ANKRD10  |
| 4.50E-30 | 1 | GNA12    |
| 4.88E-30 | 1 | MAPKAPK2 |
| 4.90E-30 | 1 | NDEL1    |
| 6.51E-30 | 1 | LRRFIP1  |
| 7.07E-30 | 1 | RNF145   |
| 7.75E-30 | 1 | COPZ2    |
| 8.55E-30 | 1 | PDLIM7   |
| 1.04E-29 | 1 | UBE2E1   |
| 1.06E-29 | 1 | MYOF     |
| 1.27E-29 | 1 | USP34    |
| 1.52E-29 | 1 | MXRA8    |
| 1.77E-29 | 1 | TMCC1    |
| 2.56E-29 | 1 | BACH1    |
| 2.86E-29 | 1 | LDLR     |
| 2.88E-29 | 1 | HECA     |

|          |   |          |
|----------|---|----------|
| 3.13E-29 | 1 | TMEM131  |
| 3.14E-29 | 1 | UBR5     |
| 3.77E-29 | 1 | ASPH     |
| 4.97E-29 | 1 | GALNT1   |
| 5.21E-29 | 1 | BICD1    |
| 5.31E-29 | 1 | CFL1     |
| 6.77E-29 | 1 | ISM1     |
| 8.83E-29 | 1 | MTDH     |
| 1.62E-28 | 1 | SLC16A1  |
| 2.37E-28 | 1 | DIP2B    |
| 2.51E-28 | 1 | TMEM165  |
| 3.41E-28 | 1 | PDZRN3   |
| 4.48E-28 | 1 | MLEC     |
| 6.45E-28 | 1 | BAG3     |
| 1.11E-27 | 1 | SRPX2    |
| 1.17E-27 | 1 | PLXDC2   |
| 1.34E-27 | 1 | CRY1     |
| 1.61E-27 | 1 | LPP      |
| 1.79E-27 | 1 | PEAK1    |
| 2.19E-27 | 1 | ZSWIM6   |
| 2.36E-27 | 1 | SMC4     |
| 2.70E-27 | 1 | WNT5B    |
| 2.74E-27 | 1 | RFX7     |
| 3.97E-27 | 1 | STAG1    |
| 4.92E-27 | 1 | ATP1B1   |
| 4.96E-27 | 1 | IGFBP3   |
| 5.87E-27 | 1 | MLLT3    |
| 7.02E-27 | 1 | CCN1     |
| 8.60E-27 | 1 | KLHL24   |
| 9.21E-27 | 1 | MICU1    |
| 9.41E-27 | 1 | ABCA1    |
| 9.71E-27 | 1 | PGK1     |
| 1.40E-26 | 1 | ZMYM4    |
| 1.47E-26 | 1 | LAMA4    |
| 1.62E-26 | 1 | DYRK1A   |
| 1.88E-26 | 1 | OSBPL8   |
| 1.91E-26 | 1 | TIAM2    |
| 2.15E-26 | 1 | PRICKLE1 |
| 2.16E-26 | 1 | PDE7B    |
| 2.28E-26 | 1 | SSR2     |
| 2.77E-26 | 1 | RIPK2    |
| 4.48E-26 | 1 | RC3H1    |
| 7.72E-26 | 1 | FRYL     |

|          |   |            |
|----------|---|------------|
| 8.60E-26 | 1 | RGCC       |
| 1.18E-25 | 1 | PPME1      |
| 1.46E-25 | 1 | LINC00578  |
| 1.66E-25 | 1 | FAM214A    |
| 1.72E-25 | 1 | TBL1XR1    |
| 2.22E-25 | 1 | MED27      |
| 3.03E-25 | 1 | RHOC       |
| 3.14E-25 | 1 | AFDN       |
| 5.78E-25 | 1 | EVI5       |
| 7.45E-25 | 1 | EZH2       |
| 7.89E-25 | 1 | PAG1       |
| 9.14E-25 | 1 | PCNX4      |
| 9.90E-25 | 1 | VCP        |
| 1.12E-24 | 1 | PRDM2      |
| 1.15E-24 | 1 | SLC38A2    |
| 1.36E-24 | 1 | MED13      |
| 1.41E-24 | 1 | PPM1D      |
| 1.45E-24 | 1 | TRA2A      |
| 1.66E-24 | 1 | ATP2A2     |
| 1.73E-24 | 1 | GOLGB1     |
| 2.32E-24 | 1 | FDX1       |
| 2.37E-24 | 1 | NUMB       |
| 3.52E-24 | 1 | CEP170     |
| 4.31E-24 | 1 | GNAQ       |
| 4.63E-24 | 1 | RRAS2      |
| 4.96E-24 | 1 | ASCC3      |
| 5.73E-24 | 1 | GAPDH      |
| 5.74E-24 | 1 | ARHGAP5    |
| 6.65E-24 | 1 | NHSL2      |
| 1.15E-23 | 1 | SERPINE1   |
| 1.47E-23 | 1 | AL050309.1 |
| 1.78E-23 | 1 | FERMT2     |
| 1.94E-23 | 1 | ELOVL5     |
| 2.35E-23 | 1 | RERE       |
| 4.98E-23 | 1 | STK3       |
| 5.25E-23 | 1 | PFKFB3     |
| 6.23E-23 | 1 | MAP4K3     |
| 6.43E-23 | 1 | RSRC1      |
| 6.67E-23 | 1 | BAZ1A      |
| 1.04E-22 | 1 | FBXO11     |
| 1.16E-22 | 1 | TRANK1     |
| 3.79E-22 | 1 | CDK13      |
| 4.08E-22 | 1 | JMY        |

|          |   |           |
|----------|---|-----------|
| 4.30E-22 | 1 | IER5      |
| 8.35E-22 | 1 | USP54     |
| 8.82E-22 | 1 | EIF2AK3   |
| 1.16E-21 | 1 | TPST1     |
| 2.05E-21 | 1 | ZFPM2-AS1 |
| 3.23E-21 | 1 | VPS13B    |
| 3.29E-21 | 1 | SNTB1     |
| 4.21E-21 | 1 | NFAT5     |
| 5.28E-21 | 1 | SFMBT2    |
| 6.64E-21 | 1 | TWSG1     |
| 1.19E-20 | 1 | APCDD1    |
| 1.30E-20 | 1 | ABI1      |
| 1.36E-20 | 1 | STARD13   |
| 2.18E-20 | 1 | FTO       |
| 2.39E-20 | 1 | UBE2E2    |
| 2.51E-20 | 1 | FOXN3     |
| 3.04E-20 | 1 | ATRX      |
| 3.58E-20 | 1 | PTBP2     |
| 3.59E-20 | 1 | SCMH1     |
| 3.87E-20 | 1 | ARID1B    |
| 9.02E-20 | 1 | NAV1      |
| 9.17E-20 | 1 | HIVEP2    |
| 1.01E-19 | 1 | ADIPOR2   |
| 2.90E-19 | 1 | DOCK4     |
| 2.91E-19 | 1 | SBF2      |
| 7.20E-19 | 1 | HLA-C     |
| 7.41E-19 | 1 | UGCG      |
| 7.44E-19 | 1 | FBXL7     |
| 1.07E-18 | 1 | NAV3      |
| 1.73E-18 | 1 | WARS      |
| 2.85E-18 | 1 | AUTS2     |
| 3.40E-18 | 1 | GIPC2     |
| 4.40E-18 | 1 | CYP51A1   |
| 1.04E-17 | 1 | RND3      |
| 2.63E-17 | 1 | GAS7      |
| 2.68E-17 | 1 | SMURF2    |
| 2.70E-17 | 1 | JAM3      |
| 3.26E-17 | 1 | TSPYL2    |
| 5.98E-17 | 1 | PAPPA     |
| 1.03E-16 | 1 | SIK3      |
| 1.17E-16 | 1 | GSTO1     |
| 1.27E-16 | 1 | RBP1      |
| 1.96E-16 | 1 | ZNF407    |

|             |   |          |
|-------------|---|----------|
| 7.80E-16    | 1 | FNIP1    |
| 1.04E-15    | 1 | CCDC85B  |
| 4.33E-15    | 1 | RLF      |
| 8.68E-15    | 1 | FLNB     |
| 1.06E-14    | 1 | KDM6A    |
| 1.66E-14    | 1 | ARHGAP24 |
| 6.28E-14    | 1 | PAM      |
| 6.50E-14    | 1 | XIST     |
| 2.67E-13    | 1 | SVIL     |
| 5.08E-13    | 1 | MRTFA    |
| 5.62E-13    | 1 | TNFRSF21 |
| 5.91E-13    | 1 | SORBS1   |
| 1.21E-12    | 1 | SAT1     |
| 2.14E-12    | 1 | SLC39A14 |
| 6.93E-12    | 1 | PRSS23   |
| 6.98E-12    | 1 | PHF21A   |
| 1.23E-11    | 1 | BNIP3    |
| 2.18E-11    | 1 | SFRP4    |
| 2.73E-11    | 1 | IFI6     |
| 2.97E-11    | 1 | MEIS2    |
| 3.18E-10    | 1 | PLAT     |
| 5.26E-10    | 1 | TUBA1A   |
| 7.23E-10    | 1 | ADAM17   |
| 1.39E-09    | 1 | IL1RAPL1 |
| 1.84E-09    | 1 | FBXW7    |
| 1.90E-09    | 1 | ACTG1    |
| 3.07E-09    | 1 | PTGDS    |
| 6.38E-07    | 1 | LSAMP    |
| 7.72E-07    | 1 | TNFAIP3  |
| 8.05E-07    | 1 | IFRD1    |
| 2.30E-05    | 1 | SLC2A3   |
| 7.54E-05    | 1 | ACTB     |
| 0.000172788 | 1 | LTBP1    |
| 0.116703796 | 1 | PBX3     |
| 1.88E-269   | 2 | MYH11    |
| 7.60E-267   | 2 | CDH6     |
| 5.61E-257   | 2 | NOTCH3   |
| 7.83E-250   | 2 | GPRC5C   |
| 2.79E-249   | 2 | APOLD1   |
| 8.52E-248   | 2 | PTP4A3   |
| 3.47E-246   | 2 | RYR2     |
| 1.33E-241   | 2 | ITGA7    |
| 6.03E-239   | 2 | SLC38A11 |

|           |   |          |
|-----------|---|----------|
| 2.45E-238 | 2 | RGS5     |
| 1.72E-236 | 2 | SLC7A2   |
| 4.14E-236 | 2 | PARM1    |
| 2.40E-232 | 2 | ADAMTS9  |
| 7.97E-228 | 2 | DGKB     |
| 4.36E-223 | 2 | CASQ2    |
| 1.51E-219 | 2 | CTNNA3   |
| 1.91E-219 | 2 | HEYL     |
| 1.58E-218 | 2 | ATP1A2   |
| 7.79E-215 | 2 | MYOCD    |
| 9.56E-214 | 2 | PIP5K1B  |
| 3.23E-211 | 2 | NRGN     |
| 2.03E-208 | 2 | GPR20    |
| 5.39E-208 | 2 | TBX2     |
| 3.47E-207 | 2 | INPP4B   |
| 3.91E-207 | 2 | RERGL    |
| 2.01E-201 | 2 | NPNT     |
| 2.25E-201 | 2 | WFDC1    |
| 1.45E-199 | 2 | LAMA5    |
| 1.70E-199 | 2 | COX4I2   |
| 1.32E-196 | 2 | AVPR1A   |
| 4.68E-195 | 2 | CSPG4    |
| 2.26E-192 | 2 | TAGLN    |
| 4.26E-192 | 2 | ACTA2    |
| 9.70E-192 | 2 | NTRK3    |
| 5.49E-191 | 2 | FOXC2    |
| 6.64E-189 | 2 | NDUFA4L2 |
| 1.48E-187 | 2 | LDB3     |
| 8.95E-185 | 2 | TBX2-AS1 |
| 9.09E-185 | 2 | TESC     |
| 1.44E-182 | 2 | SORT1    |
| 6.11E-182 | 2 | AKAP6    |
| 1.52E-180 | 2 | NTRK2    |
| 1.89E-180 | 2 | PDGFA    |
| 2.56E-180 | 2 | MAP2     |
| 9.59E-179 | 2 | SCN3A    |
| 5.35E-177 | 2 | DMD      |
| 9.63E-177 | 2 | LGI4     |
| 1.28E-175 | 2 | ECRG4    |
| 1.83E-175 | 2 | MYL9     |
| 1.08E-173 | 2 | SORBS2   |
| 2.19E-173 | 2 | CBFA2T3  |
| 3.53E-172 | 2 | SOX6     |

|           |   |             |
|-----------|---|-------------|
| 7.99E-171 | 2 | FAM162B     |
| 2.98E-167 | 2 | SYNM        |
| 1.08E-166 | 2 | HIGD1B      |
| 1.41E-165 | 2 | KCNMB1      |
| 3.34E-165 | 2 | SRL         |
| 1.40E-164 | 2 | SERPINI1    |
| 6.24E-161 | 2 | LMOD1       |
| 5.20E-160 | 2 | CLMN        |
| 8.85E-160 | 2 | CCDC3       |
| 2.26E-156 | 2 | CARMN       |
| 3.52E-155 | 2 | CSRP2       |
| 6.55E-153 | 2 | HES4        |
| 8.38E-153 | 2 | MRVI1       |
| 1.14E-152 | 2 | MYLK        |
| 3.83E-152 | 2 | PTMA        |
| 9.19E-152 | 2 | IGFBP7      |
| 1.87E-148 | 2 | RAPGEF5     |
| 1.99E-148 | 2 | ADCY5       |
| 5.36E-147 | 2 | ADAP2       |
| 2.75E-146 | 2 | TPM2        |
| 1.17E-145 | 2 | TBC1D1      |
| 7.23E-144 | 2 | CACNA1H     |
| 8.68E-144 | 2 | EGFLAM      |
| 4.16E-141 | 2 | ADGRF5      |
| 7.46E-141 | 2 | MEF2C       |
| 1.93E-140 | 2 | GJC1        |
| 2.10E-138 | 2 | ADAMTS9-AS2 |
| 2.20E-138 | 2 | EFHD1       |
| 4.48E-138 | 2 | FRY         |
| 1.52E-136 | 2 | PPM1L       |
| 4.15E-136 | 2 | KLHL23      |
| 4.14E-132 | 2 | HRH2        |
| 8.70E-131 | 2 | RCSD1       |
| 1.13E-130 | 2 | MUSTN1      |
| 5.97E-129 | 2 | TRPC6       |
| 9.21E-128 | 2 | LINC01197   |
| 3.69E-126 | 2 | CRIP2       |
| 3.84E-125 | 2 | ISYNA1      |
| 2.05E-124 | 2 | RNF152      |
| 7.61E-123 | 2 | KCNE4       |
| 8.33E-123 | 2 | SEPTIN4     |
| 1.54E-122 | 2 | MYOM1       |
| 2.53E-122 | 2 | KALRN       |



|           |   |           |
|-----------|---|-----------|
| 3.49E-122 | 2 | LINC00924 |
| 3.70E-122 | 2 | RCAN2     |
| 1.55E-121 | 2 | FRZB      |
| 5.53E-121 | 2 | NEURL1B   |
| 7.50E-119 | 2 | ITGA8     |
| 1.75E-117 | 2 | CALD1     |
| 5.63E-116 | 2 | EBF2      |
| 3.12E-115 | 2 | MTHFD2    |
| 4.29E-115 | 2 | SUSD5     |
| 1.38E-113 | 2 | SNCG      |
| 1.70E-113 | 2 | CHCHD10   |
| 3.75E-112 | 2 | C1QTNF1   |
| 3.24E-109 | 2 | MAP3K7CL  |
| 4.18E-108 | 2 | NFASC     |
| 9.67E-108 | 2 | JPH2      |
| 1.70E-107 | 2 | HEY2      |
| 3.37E-106 | 2 | ACTG2     |
| 8.41E-106 | 2 | LAMA3     |
| 7.88E-105 | 2 | COL4A2    |
| 1.60E-104 | 2 | FABP4     |
| 1.79E-104 | 2 | MYL6      |
| 5.01E-104 | 2 | ANO1      |
| 6.87E-104 | 2 | CAV2      |
| 1.50E-103 | 2 | RASGRP2   |
| 4.30E-103 | 2 | LINC00702 |
| 4.38E-103 | 2 | COL4A1    |
| 7.45E-103 | 2 | RBPM2     |
| 2.08E-102 | 2 | NRARP     |
| 2.63E-102 | 2 | TPM1      |
| 4.21E-100 | 2 | PDE3A     |
| 1.50E-99  | 2 | KCNAB1    |
| 4.60E-96  | 2 | CAV1      |
| 1.08E-95  | 2 | EDNRA     |
| 1.77E-95  | 2 | CNN1      |
| 6.24E-95  | 2 | SGCA      |
| 7.44E-93  | 2 | ID4       |
| 5.50E-92  | 2 | GRID1     |
| 5.28E-91  | 2 | EPS8      |
| 5.22E-90  | 2 | DYNC1I1   |
| 1.08E-89  | 2 | DSTN      |
| 3.96E-89  | 2 | ADIRF     |
| 4.68E-89  | 2 | KCNMA1    |
| 2.66E-88  | 2 | DTNA      |

|          |   |           |
|----------|---|-----------|
| 5.21E-87 | 2 | SYNE2     |
| 5.83E-87 | 2 | TMEM38B   |
| 2.08E-86 | 2 | CRIP1     |
| 2.21E-86 | 2 | ARHGEF17  |
| 1.21E-84 | 2 | PPP1R12A  |
| 1.26E-83 | 2 | TEX41     |
| 2.02E-83 | 2 | DENND3    |
| 2.40E-81 | 2 | ADCY3     |
| 3.27E-80 | 2 | CSRP1     |
| 4.10E-80 | 2 | SYNPO     |
| 4.56E-80 | 2 | SPECC1    |
| 1.27E-78 | 2 | PLCB4     |
| 4.50E-78 | 2 | ARHGEF7   |
| 6.27E-78 | 2 | LBH       |
| 2.38E-77 | 2 | JAG1      |
| 1.92E-76 | 2 | MERTK     |
| 2.25E-76 | 2 | PPP1R12B  |
| 7.08E-76 | 2 | COL18A1   |
| 2.20E-74 | 2 | ANGPT2    |
| 5.59E-73 | 2 | SLC22A3   |
| 1.18E-72 | 2 | MAGI1     |
| 1.61E-72 | 2 | PRKG1     |
| 2.02E-72 | 2 | UBA2      |
| 2.39E-72 | 2 | AKAP1     |
| 9.96E-72 | 2 | ACTN4     |
| 1.61E-71 | 2 | TTL7      |
| 2.79E-70 | 2 | ACTB      |
| 3.82E-70 | 2 | PLCE1     |
| 6.50E-70 | 2 | IGFBP2    |
| 1.33E-69 | 2 | NR2F2-AS1 |
| 2.63E-69 | 2 | FLNA      |
| 1.12E-68 | 2 | CALM2     |
| 1.82E-68 | 2 | DAAM2     |
| 6.61E-68 | 2 | MAP1B     |
| 1.96E-67 | 2 | SNTA1     |
| 3.09E-67 | 2 | SYNPO2    |
| 6.04E-67 | 2 | EPAS1     |
| 1.89E-66 | 2 | DMPK      |
| 4.44E-66 | 2 | TNS1      |
| 3.99E-65 | 2 | MOCS1     |
| 4.97E-65 | 2 | HIPK2     |
| 8.63E-65 | 2 | SEPTIN7   |
| 3.05E-63 | 2 | PHLDA2    |

|          |   |          |
|----------|---|----------|
| 1.01E-61 | 2 | LPP      |
| 1.04E-59 | 2 | GUCY1B1  |
| 1.32E-59 | 2 | PGM5     |
| 2.03E-59 | 2 | DOCK8    |
| 2.95E-59 | 2 | NR2F2    |
| 4.71E-59 | 2 | PAWR     |
| 2.39E-58 | 2 | CPM      |
| 2.99E-57 | 2 | DBNDD2   |
| 8.91E-57 | 2 | C11orf96 |
| 1.07E-56 | 2 | MGLL     |
| 3.97E-56 | 2 | ADAMTS4  |
| 4.51E-56 | 2 | MARK1    |
| 5.75E-56 | 2 | USP2     |
| 8.69E-56 | 2 | ACTN1    |
| 2.23E-55 | 2 | CAP2     |
| 2.29E-55 | 2 | SH3BGRL  |
| 6.34E-55 | 2 | ENPEP    |
| 6.84E-55 | 2 | MSRB3    |
| 1.22E-54 | 2 | RASAL2   |
| 2.13E-54 | 2 | SPARCL1  |
| 1.78E-52 | 2 | SEMA4B   |
| 2.16E-52 | 2 | GUCY1A1  |
| 3.58E-52 | 2 | CACNA1C  |
| 1.40E-51 | 2 | RAB20    |
| 5.95E-50 | 2 | MFGE8    |
| 6.63E-50 | 2 | PTEN     |
| 1.83E-49 | 2 | AOC3     |
| 4.67E-49 | 2 | A2M      |
| 3.00E-48 | 2 | ITGB1    |
| 1.02E-47 | 2 | LINGO1   |
| 6.87E-47 | 2 | LCLAT1   |
| 1.21E-46 | 2 | MYH9     |
| 1.70E-46 | 2 | RBPMS    |
| 4.56E-46 | 2 | MPRIIP   |
| 7.76E-46 | 2 | TSC22D1  |
| 1.94E-45 | 2 | NUDT4    |
| 6.26E-45 | 2 | RNF180   |
| 3.03E-44 | 2 | KIAA0040 |
| 2.12E-43 | 2 | MALAT1   |
| 3.59E-43 | 2 | SOX5     |
| 5.68E-42 | 2 | ARHGAP44 |
| 2.09E-41 | 2 | GALNT18  |
| 1.55E-40 | 2 | FRMD4A   |

|          |   |            |
|----------|---|------------|
| 1.79E-40 | 2 | SMTN       |
| 4.57E-40 | 2 | CAVIN3     |
| 5.25E-40 | 2 | RASL11A    |
| 9.62E-40 | 2 | NCKAP5     |
| 1.03E-39 | 2 | AC012409.2 |
| 1.26E-39 | 2 | TLN1       |
| 1.38E-39 | 2 | NES        |
| 3.68E-39 | 2 | PDGFRB     |
| 5.34E-39 | 2 | ATP1B3     |
| 1.38E-38 | 2 | PTMS       |
| 2.90E-38 | 2 | VPS13D     |
| 3.94E-38 | 2 | SELENOW    |
| 6.15E-38 | 2 | EHBP1L1    |
| 7.26E-38 | 2 | ARHGDIB    |
| 9.05E-38 | 2 | CCDC107    |
| 2.91E-37 | 2 | COX7A2     |
| 7.99E-37 | 2 | COL4A5     |
| 1.38E-36 | 2 | MGST3      |
| 1.56E-36 | 2 | GNAS       |
| 1.67E-36 | 2 | YBX1       |
| 2.39E-36 | 2 | GRIP2      |
| 3.35E-36 | 2 | HIP1       |
| 3.54E-36 | 2 | FADS3      |
| 5.93E-36 | 2 | LDLRAD3    |
| 9.14E-36 | 2 | PDE5A      |
| 4.14E-35 | 2 | ECE1       |
| 6.10E-35 | 2 | NOL3       |
| 6.41E-35 | 2 | FBLIM1     |
| 7.18E-35 | 2 | HMGB1      |
| 1.14E-34 | 2 | DGKH       |
| 2.08E-34 | 2 | LRRFIP1    |
| 3.05E-34 | 2 | DACT3      |
| 6.85E-34 | 2 | ANGPT1     |
| 1.58E-33 | 2 | WTIP       |
| 1.77E-33 | 2 | EHD2       |
| 1.80E-33 | 2 | ADAMTS1    |
| 3.98E-33 | 2 | PFN1       |
| 3.54E-32 | 2 | ROCK1      |
| 4.09E-32 | 2 | ARPC1A     |
| 5.77E-32 | 2 | FBXO32     |
| 8.26E-32 | 2 | MAPRE2     |
| 1.99E-31 | 2 | ZFH3       |
| 2.75E-31 | 2 | RAMP1      |

|          |   |          |
|----------|---|----------|
| 4.21E-31 | 2 | ADCY6    |
| 4.27E-31 | 2 | COX5B    |
| 9.86E-31 | 2 | UQCRB    |
| 1.11E-30 | 2 | UTRN     |
| 1.12E-30 | 2 | SYNGR2   |
| 1.21E-30 | 2 | COX6A1   |
| 1.31E-29 | 2 | SLC25A4  |
| 1.38E-29 | 2 | MAP3K20  |
| 3.67E-29 | 2 | NDRG2    |
| 4.37E-29 | 2 | ZBTB7C   |
| 5.99E-29 | 2 | NBEAL1   |
| 8.70E-29 | 2 | ARHGAP42 |
| 4.44E-28 | 2 | CSRNP3   |
| 6.77E-28 | 2 | CRIM1    |
| 9.20E-28 | 2 | NCK2     |
| 9.77E-28 | 2 | INPP5A   |
| 1.43E-27 | 2 | B3GNT2   |
| 2.46E-27 | 2 | MAML3    |
| 5.51E-27 | 2 | COX7B    |
| 1.22E-26 | 2 | MSN      |
| 1.35E-26 | 2 | CAMK2G   |
| 1.51E-26 | 2 | TNS3     |
| 1.67E-26 | 2 | CFL1     |
| 1.81E-26 | 2 | FCHSD2   |
| 2.72E-26 | 2 | PGF      |
| 2.82E-26 | 2 | BCL6     |
| 3.17E-26 | 2 | MOB2     |
| 4.42E-26 | 2 | SLC44A2  |
| 4.64E-26 | 2 | XKR6     |
| 5.34E-26 | 2 | A1BG     |
| 6.86E-26 | 2 | ITPK1    |
| 1.45E-25 | 2 | CACNB2   |
| 2.19E-25 | 2 | ARHGAP17 |
| 2.88E-25 | 2 | RASD1    |
| 4.01E-25 | 2 | CRTC3    |
| 8.32E-25 | 2 | ATP8B1   |
| 1.48E-24 | 2 | TGFB1I1  |
| 1.50E-24 | 2 | PDLIM5   |
| 1.60E-24 | 2 | H3F3A    |
| 4.05E-24 | 2 | OAZ2     |
| 4.48E-24 | 2 | HNRNPA3  |
| 4.89E-24 | 2 | LRRC32   |
| 6.24E-24 | 2 | ROCK2    |

|          |   |             |
|----------|---|-------------|
| 7.50E-24 | 2 | SLC35F1     |
| 7.94E-24 | 2 | IFITM2      |
| 1.06E-23 | 2 | MIR29B2CHG  |
| 1.22E-23 | 2 | ETS2        |
| 1.68E-23 | 2 | CYCS        |
| 1.91E-23 | 2 | NEXN        |
| 2.27E-23 | 2 | SYTL2       |
| 3.36E-23 | 2 | TOB1        |
| 3.47E-23 | 2 | CDC42EP4    |
| 3.77E-23 | 2 | PICALM      |
| 5.36E-23 | 2 | SMIM12      |
| 6.42E-23 | 2 | WDR1        |
| 8.66E-23 | 2 | COBLL1      |
| 5.77E-22 | 2 | PLS3        |
| 7.06E-22 | 2 | RASL12      |
| 8.12E-22 | 2 | ARHGAP6     |
| 9.25E-22 | 2 | MEF2D       |
| 1.04E-21 | 2 | SKP1        |
| 1.25E-21 | 2 | TPM4        |
| 1.31E-21 | 2 | COX8A       |
| 1.33E-21 | 2 | KLHL29      |
| 1.53E-21 | 2 | ATP5MC2     |
| 2.99E-21 | 2 | NIBAN1      |
| 3.99E-21 | 2 | SH3RF3      |
| 6.25E-21 | 2 | GAPDH       |
| 7.06E-21 | 2 | FOXC1       |
| 1.63E-20 | 2 | PPIA        |
| 1.67E-20 | 2 | S1PR3       |
| 1.70E-20 | 2 | HES1        |
| 2.45E-20 | 2 | TGFBI       |
| 3.07E-20 | 2 | EPN2        |
| 3.83E-20 | 2 | SMARCD3     |
| 4.57E-20 | 2 | PPP1R12C    |
| 5.53E-20 | 2 | UQCRH       |
| 7.99E-20 | 2 | ZNF703      |
| 9.68E-20 | 2 | TACC2       |
| 1.03E-19 | 2 | B2M         |
| 1.63E-19 | 2 | FABP5       |
| 2.65E-19 | 2 | PALM2-AKAP2 |
| 2.90E-19 | 2 | ATP2B4      |
| 6.37E-19 | 2 | NDUFA4      |
| 1.30E-18 | 2 | NDUFB10     |
| 1.33E-18 | 2 | ODC1        |

|          |   |         |
|----------|---|---------|
| 3.13E-18 | 2 | SMIM10  |
| 4.25E-18 | 2 | SMOC2   |
| 4.31E-18 | 2 | PLXND1  |
| 5.82E-18 | 2 | SNRK    |
| 6.26E-18 | 2 | ENAH    |
| 9.46E-18 | 2 | ATP5F1B |
| 2.20E-17 | 2 | CDKN1A  |
| 2.60E-17 | 2 | RNF150  |
| 3.42E-17 | 2 | OLFML2A |
| 5.14E-17 | 2 | NHS     |
| 5.67E-17 | 2 | EOGT    |
| 7.73E-17 | 2 | TRAF5   |
| 8.52E-17 | 2 | PPP1CB  |
| 9.02E-17 | 2 | HSDL2   |
| 1.26E-16 | 2 | FAM241A |
| 1.33E-16 | 2 | CHCHD2  |
| 1.47E-16 | 2 | NDUFA7  |
| 1.66E-16 | 2 | SMAP2   |
| 2.08E-16 | 2 | CALM1   |
| 2.24E-16 | 2 | GUCY1A2 |
| 2.64E-16 | 2 | KTN1    |
| 3.93E-16 | 2 | LDHB    |
| 4.57E-16 | 2 | ARPC5   |
| 5.13E-16 | 2 | CHURC1  |
| 5.23E-16 | 2 | CAMTA1  |
| 5.73E-16 | 2 | LGALSL  |
| 6.87E-16 | 2 | MYO1B   |
| 8.64E-16 | 2 | NDUFB7  |
| 9.75E-16 | 2 | NDUFS2  |
| 1.71E-15 | 2 | STOM    |
| 1.95E-15 | 2 | PDCL3   |
| 2.13E-15 | 2 | ADGRE5  |
| 2.18E-15 | 2 | ITPR1   |
| 2.74E-15 | 2 | NDUFB8  |
| 2.79E-15 | 2 | ITGA1   |
| 3.69E-15 | 2 | HDAC9   |
| 3.82E-15 | 2 | VASP    |
| 4.67E-15 | 2 | SLC25A6 |
| 5.50E-15 | 2 | YBX3    |
| 5.54E-15 | 2 | LBR     |
| 5.55E-15 | 2 | VCL     |
| 7.90E-15 | 2 | COX7A1  |
| 9.99E-15 | 2 | SBDS    |

|          |   |            |
|----------|---|------------|
| 1.12E-14 | 2 | FAM13C     |
| 1.32E-14 | 2 | ETS1       |
| 1.37E-14 | 2 | ANP32B     |
| 1.54E-14 | 2 | PKIG       |
| 1.56E-14 | 2 | CPE        |
| 1.67E-14 | 2 | RABGAP1    |
| 2.40E-14 | 2 | RSU1       |
| 2.49E-14 | 2 | SOX13      |
| 4.69E-14 | 2 | PPP2R5A    |
| 5.12E-14 | 2 | BCL2       |
| 5.94E-14 | 2 | COX6C      |
| 7.17E-14 | 2 | AC083870.1 |
| 7.71E-14 | 2 | TOB2       |
| 7.78E-14 | 2 | RHOB       |
| 8.50E-14 | 2 | INF2       |
| 1.07E-13 | 2 | GPATCH4    |
| 1.11E-13 | 2 | PLEKHO1    |
| 1.33E-13 | 2 | ATP5MD     |
| 1.42E-13 | 2 | TMSB4X     |
| 1.46E-13 | 2 | COX17      |
| 1.48E-13 | 2 | SNHG15     |
| 1.64E-13 | 2 | BTG1       |
| 1.68E-13 | 2 | EPST11     |
| 1.70E-13 | 2 | ATP5MG     |
| 1.88E-13 | 2 | CBX7       |
| 1.99E-13 | 2 | ZBTB38     |
| 2.12E-13 | 2 | GADD45B    |
| 2.35E-13 | 2 | CRYAB      |
| 2.65E-13 | 2 | ATP5F1D    |
| 2.99E-13 | 2 | PFDN5      |
| 3.01E-13 | 2 | ZNRF2      |
| 3.57E-13 | 2 | PACSIN2    |
| 5.51E-13 | 2 | ATP10A     |
| 8.51E-13 | 2 | DOCK10     |
| 1.27E-12 | 2 | RERG       |
| 1.35E-12 | 2 | CREM       |
| 1.46E-12 | 2 | PDE1A      |
| 1.52E-12 | 2 | ARID5A     |
| 2.14E-12 | 2 | UQCR11     |
| 2.39E-12 | 2 | PITPNC1    |
| 2.89E-12 | 2 | ACTR3      |
| 3.18E-12 | 2 | FKBP5      |
| 3.26E-12 | 2 | SELENOM    |



|          |   |            |
|----------|---|------------|
| 3.39E-12 | 2 | ARHGAP15   |
| 3.71E-12 | 2 | SLCO3A1    |
| 4.82E-12 | 2 | ANXA6      |
| 5.26E-12 | 2 | FILIP1L    |
| 5.41E-12 | 2 | LARGE1     |
| 5.71E-12 | 2 | HLA-F      |
| 5.98E-12 | 2 | HNRNPA1    |
| 7.52E-12 | 2 | DGKD       |
| 8.60E-12 | 2 | ARHGEF25   |
| 8.93E-12 | 2 | FGD4       |
| 1.02E-11 | 2 | CKB        |
| 1.07E-11 | 2 | RRAD       |
| 1.70E-11 | 2 | CD151      |
| 1.80E-11 | 2 | ARPC2      |
| 1.84E-11 | 2 | SGIP1      |
| 2.03E-11 | 2 | L3MBTL4    |
| 2.33E-11 | 2 | BHLHE40    |
| 2.54E-11 | 2 | NACC2      |
| 2.68E-11 | 2 | HOPX       |
| 2.74E-11 | 2 | TACC1      |
| 3.25E-11 | 2 | MAP7D3     |
| 4.02E-11 | 2 | COX14      |
| 4.07E-11 | 2 | ARHGAP29   |
| 4.63E-11 | 2 | CAP1       |
| 5.28E-11 | 2 | SLC25A3    |
| 5.59E-11 | 2 | PTK2       |
| 5.91E-11 | 2 | IL6R       |
| 7.66E-11 | 2 | POMP       |
| 9.43E-11 | 2 | AC068888.1 |
| 1.10E-10 | 2 | SH3RF1     |
| 1.26E-10 | 2 | CCND1      |
| 1.36E-10 | 2 | CDS2       |
| 1.51E-10 | 2 | MAT2A      |
| 1.53E-10 | 2 | ILK        |
| 1.62E-10 | 2 | GLRX5      |
| 1.79E-10 | 2 | AFF3       |
| 2.54E-10 | 2 | GAMT       |
| 2.76E-10 | 2 | MRTFB      |
| 3.09E-10 | 2 | RRAS       |
| 4.45E-10 | 2 | SORBS1     |
| 5.33E-10 | 2 | KANK2      |
| 5.87E-10 | 2 | AC025280.3 |
| 6.24E-10 | 2 | FILIP1     |

|          |   |          |
|----------|---|----------|
| 8.12E-10 | 2 | FOXK2    |
| 1.13E-09 | 2 | FAU      |
| 1.33E-09 | 2 | CD59     |
| 1.51E-09 | 2 | TMEM131L |
| 1.86E-09 | 2 | SNRPB    |
| 2.33E-09 | 2 | ENDOD1   |
| 2.35E-09 | 2 | NT5DC2   |
| 2.47E-09 | 2 | CERS6    |
| 2.64E-09 | 2 | MYO1D    |
| 3.44E-09 | 2 | PRMT9    |
| 3.83E-09 | 2 | SYPL1    |
| 4.22E-09 | 2 | MKNK2    |
| 5.06E-09 | 2 | ATP5PF   |
| 5.51E-09 | 2 | BCAS3    |
| 7.11E-09 | 2 | CDH13    |
| 7.15E-09 | 2 | SLC25A5  |
| 8.14E-09 | 2 | SSBP2    |
| 9.16E-09 | 2 | RGS16    |
| 1.15E-08 | 2 | PPFIA2   |
| 1.16E-08 | 2 | CSDE1    |
| 1.25E-08 | 2 | PMEPA1   |
| 1.32E-08 | 2 | MRPL33   |
| 1.57E-08 | 2 | NR4A3    |
| 1.75E-08 | 2 | B3GALNT2 |
| 1.92E-08 | 2 | TAX1BP1  |
| 2.05E-08 | 2 | SLC25A25 |
| 2.65E-08 | 2 | BST2     |
| 2.78E-08 | 2 | TLE1     |
| 2.87E-08 | 2 | MICU3    |
| 4.01E-08 | 2 | TCIM     |
| 4.37E-08 | 2 | TNC      |
| 4.71E-08 | 2 | CSNK1A1  |
| 4.84E-08 | 2 | RASSF3   |
| 5.45E-08 | 2 | AOPEP    |
| 6.12E-08 | 2 | STK38L   |
| 7.48E-08 | 2 | PCSK7    |
| 1.12E-07 | 2 | CTBP2    |
| 1.25E-07 | 2 | PDLIM7   |
| 1.37E-07 | 2 | PGM2     |
| 1.45E-07 | 2 | GUK1     |
| 1.68E-07 | 2 | NDUFB4   |
| 1.69E-07 | 2 | PIP4K2A  |
| 1.73E-07 | 2 | TGFB1    |

|          |   |          |
|----------|---|----------|
| 3.11E-07 | 2 | ANAPC16  |
| 3.16E-07 | 2 | FARP1    |
| 3.99E-07 | 2 | SRSF3    |
| 4.85E-07 | 2 | NRP1     |
| 4.85E-07 | 2 | VIM      |
| 5.05E-07 | 2 | LIMS2    |
| 5.18E-07 | 2 | CPEB4    |
| 5.32E-07 | 2 | POR      |
| 5.79E-07 | 2 | NDUFS6   |
| 5.97E-07 | 2 | NMD3     |
| 6.85E-07 | 2 | CHSY1    |
| 8.32E-07 | 2 | GPCPD1   |
| 9.64E-07 | 2 | RELL1    |
| 1.02E-06 | 2 | TRAK1    |
| 1.10E-06 | 2 | ABHD2    |
| 1.22E-06 | 2 | LURAP1L  |
| 1.34E-06 | 2 | ZNF331   |
| 1.42E-06 | 2 | BGN      |
| 1.43E-06 | 2 | TBL1X    |
| 1.47E-06 | 2 | SSBP3    |
| 1.51E-06 | 2 | PLCL1    |
| 1.77E-06 | 2 | CBX6     |
| 2.24E-06 | 2 | TMEM47   |
| 2.31E-06 | 2 | MTUS1    |
| 2.43E-06 | 2 | MXI1     |
| 2.56E-06 | 2 | TBCA     |
| 3.07E-06 | 2 | COX4I1   |
| 3.51E-06 | 2 | PHLDA1   |
| 4.04E-06 | 2 | ZNF141   |
| 4.17E-06 | 2 | ISG15    |
| 4.30E-06 | 2 | EIF1AY   |
| 4.39E-06 | 2 | HIF1A    |
| 4.74E-06 | 2 | EIF2S3   |
| 4.89E-06 | 2 | UBL5     |
| 5.28E-06 | 2 | SUN1     |
| 5.59E-06 | 2 | NDUFA13  |
| 5.66E-06 | 2 | AXL      |
| 5.82E-06 | 2 | CAVIN1   |
| 7.75E-06 | 2 | COX6B1   |
| 8.01E-06 | 2 | HOXB-AS1 |
| 1.00E-05 | 2 | MYLIP    |
| 1.29E-05 | 2 | HINT1    |
| 1.38E-05 | 2 | IK       |

|             |   |          |
|-------------|---|----------|
| 1.39E-05    | 2 | KLF9     |
| 1.47E-05    | 2 | CBL      |
| 1.73E-05    | 2 | SLC39A11 |
| 1.76E-05    | 2 | PCGF5    |
| 1.90E-05    | 2 | ZEB2     |
| 2.07E-05    | 2 | OPA3     |
| 2.15E-05    | 2 | ADGRB3   |
| 2.37E-05    | 2 | KIF1C    |
| 2.57E-05    | 2 | NDUFV2   |
| 2.64E-05    | 2 | IER5L    |
| 2.66E-05    | 2 | NET1     |
| 2.69E-05    | 2 | SET      |
| 2.71E-05    | 2 | NDUFS5   |
| 3.19E-05    | 2 | CYSTM1   |
| 3.35E-05    | 2 | UBE2D2   |
| 3.92E-05    | 2 | CD9      |
| 4.03E-05    | 2 | H3F3B    |
| 4.60E-05    | 2 | CPT1A    |
| 4.60E-05    | 2 | CDC42    |
| 4.69E-05    | 2 | RAB13    |
| 5.03E-05    | 2 | NDUFB2   |
| 5.40E-05    | 2 | APBB2    |
| 5.69E-05    | 2 | TJP1     |
| 6.05E-05    | 2 | NCL      |
| 6.60E-05    | 2 | SPEN     |
| 7.18E-05    | 2 | CSNK1E   |
| 7.86E-05    | 2 | KIAA0232 |
| 8.70E-05    | 2 | YWHAZ    |
| 9.25E-05    | 2 | COX7C    |
| 0.000103381 | 2 | CHMP4A   |
| 0.000113676 | 2 | NDUFA12  |
| 0.000118602 | 2 | C12orf57 |
| 0.000147313 | 2 | DLEU2    |
| 0.000154168 | 2 | EIF4A1   |
| 0.000161912 | 2 | EDIL3    |
| 0.000197409 | 2 | PAG1     |
| 0.000213534 | 2 | VWA8     |
| 0.000232174 | 2 | PCED1B   |
| 0.000252649 | 2 | ATP2A2   |
| 0.000306269 | 2 | NDUFA1   |
| 0.000307555 | 2 | GRK5     |
| 0.000323414 | 2 | ELOB     |
| 0.000323638 | 2 | ETV6     |

|             |   |           |
|-------------|---|-----------|
| 0.000420651 | 2 | HCFC1R1   |
| 0.000450318 | 2 | LINC00910 |
| 0.000453791 | 2 | RAN       |
| 0.00051614  | 2 | SELENOK   |
| 0.000520068 | 2 | TEAD3     |
| 0.000524689 | 2 | CCT6A     |
| 0.000578047 | 2 | RAPGEF2   |
| 0.00058424  | 2 | ARHGEF12  |
| 0.000611468 | 2 | SMURF1    |
| 0.00067277  | 2 | NDUFB11   |
| 0.000732715 | 2 | PTN       |
| 0.000747147 | 2 | CABIN1    |
| 0.000818963 | 2 | MYO1C     |
| 0.0008723   | 2 | EIF3H     |
| 0.000901442 | 2 | CRISPLD2  |
| 0.000934451 | 2 | MRPL32    |
| 0.001131447 | 2 | UQCRC1    |
| 0.001292336 | 2 | MICOS10   |
| 0.001308813 | 2 | CCT3      |
| 0.001310318 | 2 | PURB      |
| 0.001342792 | 2 | HIST1H4C  |
| 0.001395292 | 2 | SMIM3     |
| 0.001735858 | 2 | ABTB1     |
| 0.001743563 | 2 | OSBPL1A   |
| 0.001909389 | 2 | EXOC2     |
| 0.001965375 | 2 | COX20     |
| 0.002151499 | 2 | TOMM20    |
| 0.00248751  | 2 | ADCY9     |
| 0.002494857 | 2 | SUSD6     |
| 0.002994252 | 2 | NDUFA6    |
| 0.003092918 | 2 | UBXN1     |
| 0.003116859 | 2 | DBI       |
| 0.00336966  | 2 | IDH2      |
| 0.0034004   | 2 | MYO1E     |
| 0.003693522 | 2 | PSMA7     |
| 0.003714643 | 2 | C5orf24   |
| 0.004047699 | 2 | PABPC1    |
| 0.004146748 | 2 | RASSF1    |
| 0.004645557 | 2 | SLMAP     |
| 0.004866797 | 2 | EHD1      |
| 0.005634047 | 2 | CH25H     |
| 0.005723318 | 2 | INAFM1    |
| 0.005820663 | 2 | SLC7A5    |

|             |   |           |
|-------------|---|-----------|
| 0.006280802 | 2 | REEP3     |
| 0.006926382 | 2 | HLA-B     |
| 0.007442845 | 2 | STK39     |
| 0.007562359 | 2 | NDUFA2    |
| 0.007779687 | 2 | C20orf27  |
| 0.008029747 | 2 | EIF5B     |
| 0.009236096 | 2 | HABP4     |
| 0.00934323  | 2 | ARHGEF10L |
| 0.00940282  | 2 | PHLDB2    |
| 0.009938574 | 2 | EVA1C     |
| 0.01208697  | 2 | PDCD10    |
| 0.0132248   | 2 | MOB3B     |
| 0.014976627 | 2 | DYNLT1    |
| 0.015217005 | 2 | OLA1      |
| 0.016598294 | 2 | UBE2N     |
| 0.017127362 | 2 | SEPTIN9   |
| 0.01809238  | 2 | NUTF2     |
| 0.019902438 | 2 | FKBP4     |
| 0.020211669 | 2 | ATP5ME    |
| 0.020431967 | 2 | VDAC2     |
| 0.020751273 | 2 | ATP5F1E   |
| 0.020976317 | 2 | BCL9L     |
| 0.0211694   | 2 | PPDPF     |
| 0.022283176 | 2 | HAPLN3    |
| 0.024986094 | 2 | RHOQ      |
| 0.028529812 | 2 | ARHGAP1   |
| 0.028771896 | 2 | ZBTB16    |
| 0.02914122  | 2 | ARHGAP26  |
| 0.03172918  | 2 | C7orf50   |
| 0.031893985 | 2 | TMEM108   |
| 0.034809979 | 2 | NCALD     |
| 0.035994034 | 2 | H2AFJ     |
| 0.037339409 | 2 | HNRNPM    |
| 0.043674908 | 2 | DYNLT3    |
| 0.051365276 | 2 | PTPRK     |
| 0.053870175 | 2 | NME4      |
| 0.055645596 | 2 | MICOS13   |
| 0.057749849 | 2 | PCBP1     |
| 0.05843369  | 2 | NDUFAF4   |
| 0.061403253 | 2 | UQCRQ     |
| 0.071947325 | 2 | HMG2      |
| 0.074727213 | 2 | ATP5MC3   |
| 0.075334632 | 2 | RWDD1     |

|             |   |            |
|-------------|---|------------|
| 0.081715089 | 2 | EGFL6      |
| 0.083114574 | 2 | PJA2       |
| 0.089642171 | 2 | SERPINB6   |
| 0.090509128 | 2 | LDLRAD4    |
| 0.092533083 | 2 | GADD45GIP1 |
| 0.093237189 | 2 | CCNH       |
| 0.09574796  | 2 | ANP32A     |
| 0.100550563 | 2 | NDUFA5     |
| 0.112825426 | 2 | ATP5PB     |
| 0.115777929 | 2 | SRSF5      |
| 0.123229289 | 2 | ST5        |
| 0.125723347 | 2 | CLIC1      |
| 0.128280748 | 2 | MRPS36     |
| 0.129773863 | 2 | PNN        |
| 0.130063357 | 2 | NT5DC1     |
| 0.139574287 | 2 | MYL12A     |
| 0.144455713 | 2 | SRGN       |
| 0.145025577 | 2 | ARHGEF9    |
| 0.151530095 | 2 | SNTB1      |
| 0.154226399 | 2 | KIRREL1    |
| 0.158848279 | 2 | GADD45A    |
| 0.168546701 | 2 | HRAS       |
| 0.169470838 | 2 | ATP5PO     |
| 0.187915886 | 2 | EMD        |
| 0.192590721 | 2 | COX5A      |
| 0.19990409  | 2 | ARPC3      |
| 0.201426001 | 2 | SEM1       |
| 0.207574956 | 2 | HLA-DRA    |
| 0.217616995 | 2 | CHD1       |
| 0.222678721 | 2 | CCDC102B   |
| 0.285279059 | 2 | H2AFZ      |
| 0.294619415 | 2 | MIF        |
| 0.315356216 | 2 | CYC1       |
| 0.325428215 | 2 | CDKN1B     |
| 0.329967476 | 2 | RAD23A     |
| 0.348744737 | 2 | TOX2       |
| 0.362410628 | 2 | NDUFB9     |
| 0.43094549  | 2 | RAP2A      |
| 0.515899762 | 2 | TNS2       |
| 0.561733756 | 2 | CCT8       |
| 0.601396505 | 2 | CREB3L2    |
| 0.673880006 | 2 | NAP1L1     |
| 0.702238478 | 2 | ESYT2      |

|             |   |             |
|-------------|---|-------------|
| 0.70803812  | 2 | FAM50A      |
| 0.724376759 | 2 | PSMD4       |
| 0.772263312 | 2 | VAMP2       |
| 0.79717869  | 2 | ATP5F1A     |
| 0.874656203 | 2 | ABCA5       |
| 0.917884441 | 2 | NAV2        |
| 0.977719893 | 2 | ATP5IF1     |
| 1           | 2 | YWHAH       |
| 1           | 2 | RANBP2      |
| 1           | 2 | SRRM1       |
| 1           | 2 | IFITM3      |
| 1           | 2 | KIF5B       |
| 1           | 2 | LGALS1      |
| 1           | 2 | IQCJ-SCHIP1 |
| 1           | 2 | ATPAF1      |
| 1           | 2 | HNRNPH3     |
| 1           | 2 | NDUFAB1     |
| 1           | 2 | NDUFB1      |
| 1           | 2 | POLR2K      |
| 1           | 2 | OSMR        |
| 1           | 2 | OSBPL5      |
| 1           | 2 | SIVA1       |
| 1           | 2 | XRCC5       |
| 1           | 2 | UBE2M       |
| 1           | 2 | ARHGAP10    |
| 1           | 2 | PDK4        |
| 1           | 2 | AP2M1       |
| 1           | 2 | ACTR2       |
| 1           | 2 | CALM3       |
| 1           | 2 | NTN4        |
| 1           | 2 | IQSEC1      |
| 1           | 2 | BCAP29      |
| 1           | 2 | CAPZA2      |
| 1           | 2 | MGAT5       |
| 1           | 2 | NFIL3       |
| 1           | 2 | SH3KBP1     |
| 1           | 2 | PA2G4       |
| 1           | 2 | R3HCC1      |
| 1           | 2 | CTDSPL      |
| 1           | 2 | JADE1       |
| 1           | 2 | MIDN        |
| 1           | 2 | COPS6       |
| 1           | 2 | BANF1       |



|   |   |          |
|---|---|----------|
| 1 | 2 | ANGPTL1  |
| 1 | 2 | PDZD2    |
| 1 | 2 | DYNC1LI2 |
| 1 | 2 | SAP18    |
| 1 | 2 | LUC7L2   |
| 1 | 2 | CCT7     |
| 1 | 2 | FBXW5    |
| 1 | 2 | BAG1     |
| 1 | 2 | SPRY2    |
| 1 | 2 | SMG7     |
| 1 | 2 | PSMB6    |
| 1 | 2 | TIPARP   |
| 1 | 2 | ASAP1    |
| 1 | 2 | CDK2AP2  |
| 1 | 2 | NDUFS8   |
| 1 | 2 | UNC5C    |
| 1 | 2 | RNASEH2C |
| 1 | 2 | SLIRP    |
| 1 | 2 | NGRN     |
| 1 | 2 | DDT      |
| 1 | 2 | SEMA5A   |
| 1 | 2 | SF1      |
| 1 | 2 | GPHN     |
| 1 | 2 | GADD45G  |
| 1 | 2 | MPDZ     |
| 1 | 2 | HK1      |
| 1 | 2 | ARL6IP4  |
| 1 | 2 | TPI1     |
| 1 | 2 | DYNLRB1  |
| 1 | 2 | MRPL20   |
| 1 | 2 | PHACTR2  |
| 1 | 2 | CNNM2    |
| 1 | 2 | ELL2     |
| 1 | 2 | METRN    |
| 1 | 2 | MBNL1    |
| 1 | 2 | KNOP1    |
| 1 | 2 | UBE2W    |
| 1 | 2 | CHMP2A   |
| 1 | 2 | SORBS3   |
| 1 | 2 | GMDS     |
| 1 | 2 | NUDC     |
| 1 | 2 | RALGAPA1 |
| 1 | 2 | CYTOR    |

|   |   |             |
|---|---|-------------|
| 1 | 2 | TAF7        |
| 1 | 2 | PIN1        |
| 1 | 2 | ZNF580      |
| 1 | 2 | IMMT        |
| 1 | 2 | ZC3H13      |
| 1 | 2 | AIG1        |
| 1 | 2 | ARL3        |
| 1 | 2 | TMEM204     |
| 1 | 2 | AURKAIP1    |
| 1 | 2 | RBM3        |
| 1 | 2 | PXDN        |
| 1 | 2 | FRYL        |
| 1 | 2 | UBR1        |
| 1 | 2 | NAA10       |
| 1 | 2 | SCLT1       |
| 1 | 2 | PRR16       |
| 1 | 2 | DDX21       |
| 1 | 2 | IMMP2L      |
| 1 | 2 | NR1H2       |
| 1 | 2 | SLC20A2     |
| 1 | 2 | MRGPRF      |
| 1 | 2 | UGCG        |
| 1 | 2 | CDC73       |
| 1 | 2 | PSMC3       |
| 1 | 2 | POLR2I      |
| 1 | 2 | CCDC124     |
| 1 | 2 | C1orf54     |
| 1 | 2 | PLEC        |
| 1 | 2 | HIST1H1C    |
| 1 | 2 | MAGED2      |
| 1 | 2 | PDE8A       |
| 1 | 2 | VDAC1       |
| 1 | 2 | PSMB3       |
| 1 | 2 | MLF2        |
| 1 | 2 | PVT1        |
| 1 | 2 | SPECC1L     |
| 1 | 2 | ASPN        |
| 1 | 2 | MIR4435-2HG |
| 1 | 2 | PRXL2C      |
| 1 | 2 | ARGLU1      |
| 1 | 2 | SRSF7       |
| 1 | 2 | PGAP1       |
| 1 | 2 | RB1         |

|           |   |          |
|-----------|---|----------|
| 1         | 2 | ZBTB10   |
| 1         | 2 | RTRAF    |
| 1         | 2 | PRXL2A   |
| 1         | 2 | CDC5L    |
| 1         | 2 | RHOC     |
| 1         | 2 | CEP85L   |
| 1         | 2 | MDM4     |
| 1         | 2 | NME2     |
| 1         | 2 | DDX6     |
| 1         | 2 | ID1      |
| 1         | 2 | ILF3-DT  |
| 1.21E-125 | 3 | IGFBP6   |
| 1.63E-125 | 3 | PLAC9    |
| 3.28E-118 | 3 | DCN      |
| 5.68E-118 | 3 | FBLN1    |
| 1.08E-116 | 3 | ITM2A    |
| 1.99E-115 | 3 | SERPING1 |
| 4.03E-114 | 3 | SERPINF1 |
| 1.04E-112 | 3 | CD81     |
| 3.69E-112 | 3 | PI16     |
| 1.85E-109 | 3 | CD34     |
| 3.00E-109 | 3 | CLU      |
| 2.57E-108 | 3 | CFD      |
| 5.03E-106 | 3 | ITM2B    |
| 8.71E-103 | 3 | PCOLCE2  |
| 2.91E-102 | 3 | MFAP5    |
| 9.27E-102 | 3 | TNXB     |
| 1.23E-101 | 3 | MFAP4    |
| 1.13E-95  | 3 | OGN      |
| 4.90E-94  | 3 | EFEMP1   |
| 5.12E-94  | 3 | LTBP4    |
| 7.31E-93  | 3 | CLEC3B   |
| 5.44E-90  | 3 | MGP      |
| 5.25E-89  | 3 | FCGRT    |
| 1.05E-88  | 3 | PLTP     |
| 2.13E-88  | 3 | S100A10  |
| 8.03E-88  | 3 | MGST1    |
| 3.02E-85  | 3 | CADM3    |
| 1.10E-83  | 3 | C1S      |
| 2.76E-83  | 3 | PSAP     |
| 2.99E-81  | 3 | CILP     |
| 5.97E-81  | 3 | LSP1     |
| 6.46E-81  | 3 | FBLN2    |

|          |   |          |
|----------|---|----------|
| 2.50E-80 | 3 | SOD3     |
| 4.58E-80 | 3 | PRELP    |
| 1.50E-79 | 3 | C1QTNF3  |
| 7.95E-79 | 3 | LGALS3BP |
| 1.31E-78 | 3 | SERPINA3 |
| 4.91E-78 | 3 | SCARA5   |
| 1.10E-77 | 3 | RNASE4   |
| 2.33E-77 | 3 | ANXA1    |
| 3.35E-73 | 3 | ANXA2    |
| 2.21E-72 | 3 | SLPI     |
| 4.99E-72 | 3 | C3       |
| 1.05E-70 | 3 | CXCL12   |
| 1.12E-70 | 3 | CCDC80   |
| 2.19E-70 | 3 | PMP22    |
| 1.17E-69 | 3 | PODN     |
| 3.08E-69 | 3 | OLFML3   |
| 3.45E-69 | 3 | LAPTM4A  |
| 1.14E-68 | 3 | FXYP1    |
| 1.53E-67 | 3 | DDAH2    |
| 1.57E-67 | 3 | OMD      |
| 3.12E-67 | 3 | PHGDH    |
| 5.78E-66 | 3 | CCN5     |
| 8.66E-66 | 3 | NPC2     |
| 9.14E-66 | 3 | GPNMB    |
| 1.15E-65 | 3 | CHRDL1   |
| 6.73E-65 | 3 | SELENOP  |
| 4.84E-64 | 3 | ADH1B    |
| 2.08E-62 | 3 | PLA2G2A  |
| 1.08E-61 | 3 | OAF      |
| 1.66E-59 | 3 | RAMP2    |
| 2.31E-59 | 3 | P2RX2    |
| 2.38E-59 | 3 | TIMP1    |
| 7.05E-59 | 3 | TXNIP    |
| 2.50E-58 | 3 | S100A13  |
| 1.12E-57 | 3 | DPT      |
| 2.35E-57 | 3 | LGALS3   |
| 3.69E-57 | 3 | CTSF     |
| 6.21E-57 | 3 | KLF4     |
| 2.09E-56 | 3 | C17orf58 |
| 3.18E-56 | 3 | VSIR     |
| 5.17E-56 | 3 | RNH1     |
| 7.63E-56 | 3 | CD99     |
| 2.03E-55 | 3 | PLBD1    |

|          |   |           |
|----------|---|-----------|
| 1.27E-54 | 3 | PTGIS     |
| 1.29E-54 | 3 | SCPEP1    |
| 1.52E-53 | 3 | EPHX1     |
| 2.17E-53 | 3 | PTGES     |
| 4.36E-53 | 3 | GPX3      |
| 5.42E-53 | 3 | GPX4      |
| 5.83E-53 | 3 | TMEM59    |
| 6.20E-52 | 3 | ZFP36L2   |
| 9.16E-52 | 3 | AKR1C1    |
| 5.56E-51 | 3 | ALDH2     |
| 6.72E-51 | 3 | ANXA4     |
| 1.90E-50 | 3 | CYBRD1    |
| 3.97E-50 | 3 | NPDC1     |
| 1.66E-49 | 3 | ALDH1A1   |
| 3.10E-49 | 3 | FEZ1      |
| 5.08E-49 | 3 | CPVL      |
| 6.62E-49 | 3 | ADAMTSL4  |
| 7.65E-49 | 3 | DUSP1     |
| 1.24E-48 | 3 | ACKR3     |
| 1.77E-48 | 3 | ARL6IP5   |
| 1.42E-47 | 3 | NPR1      |
| 1.81E-47 | 3 | SRPX      |
| 1.94E-47 | 3 | LRRN4CL   |
| 2.79E-47 | 3 | AKR1C2    |
| 2.81E-47 | 3 | LINC01133 |
| 3.06E-47 | 3 | SEMA3C    |
| 4.03E-47 | 3 | PLD3      |
| 4.67E-47 | 3 | CYP4B1    |
| 7.35E-47 | 3 | S100A6    |
| 1.00E-46 | 3 | HIGD1A    |
| 1.35E-46 | 3 | F10       |
| 6.25E-46 | 3 | REXO2     |
| 1.08E-45 | 3 | PRDX1     |
| 2.49E-45 | 3 | CD9       |
| 6.99E-45 | 3 | FHL1      |
| 7.37E-45 | 3 | MYOC      |
| 2.21E-44 | 3 | KLF2      |
| 2.32E-44 | 3 | SFRP2     |
| 3.16E-44 | 3 | ZNF385A   |
| 7.03E-44 | 3 | PIGT      |
| 7.95E-44 | 3 | EEF1A1    |
| 1.40E-43 | 3 | NENF      |
| 1.57E-43 | 3 | ABHD14A   |

|          |   |           |
|----------|---|-----------|
| 1.93E-43 | 3 | TMBIM4    |
| 6.76E-43 | 3 | UAP1      |
| 1.18E-42 | 3 | EMP3      |
| 1.44E-42 | 3 | VAT1      |
| 1.45E-42 | 3 | NUPR1     |
| 2.22E-42 | 3 | EIF1      |
| 5.33E-42 | 3 | AKR1C3    |
| 7.10E-42 | 3 | GNG11     |
| 8.10E-42 | 3 | TSPAN4    |
| 1.41E-41 | 3 | SMIM14    |
| 1.84E-41 | 3 | TAGLN2    |
| 2.82E-41 | 3 | GRN       |
| 3.93E-41 | 3 | GSTM5     |
| 5.37E-41 | 3 | S100A4    |
| 1.45E-40 | 3 | DBN1      |
| 2.49E-40 | 3 | BST1      |
| 3.43E-40 | 3 | SFRP1     |
| 1.03E-39 | 3 | ABI3BP    |
| 1.52E-39 | 3 | SH3BGRL3  |
| 1.86E-39 | 3 | ATRAID    |
| 2.04E-39 | 3 | CTSH      |
| 2.23E-39 | 3 | ELN       |
| 3.80E-39 | 3 | PROCR     |
| 4.00E-39 | 3 | CYP1B1    |
| 5.61E-39 | 3 | GYPE      |
| 6.86E-39 | 3 | CYB5A     |
| 1.55E-38 | 3 | TMEM109   |
| 2.32E-38 | 3 | CTSD      |
| 1.38E-37 | 3 | TPPP3     |
| 1.68E-37 | 3 | CPQ       |
| 3.05E-37 | 3 | IL18      |
| 9.23E-37 | 3 | IFIT1     |
| 1.78E-36 | 3 | ABLIM1    |
| 2.48E-36 | 3 | OSR1      |
| 6.53E-36 | 3 | ITGBL1    |
| 1.32E-35 | 3 | TRIOBP    |
| 2.21E-35 | 3 | TIMP3     |
| 2.63E-35 | 3 | ABCA8     |
| 4.36E-35 | 3 | PDGFRL    |
| 1.38E-34 | 3 | LINC02802 |
| 1.85E-34 | 3 | LTBP3     |
| 2.17E-34 | 3 | TSC22D3   |
| 3.75E-34 | 3 | SEMA3B    |

|          |   |           |
|----------|---|-----------|
| 4.55E-34 | 3 | TGFBR3    |
| 2.26E-33 | 3 | BTF3      |
| 4.16E-33 | 3 | HSD3B7    |
| 4.76E-33 | 3 | VEGFD     |
| 4.82E-33 | 3 | FAIM2     |
| 1.91E-32 | 3 | CD63      |
| 2.54E-32 | 3 | FGL2      |
| 2.62E-32 | 3 | VEGFB     |
| 5.64E-32 | 3 | SERPINE2  |
| 8.02E-32 | 3 | CREG1     |
| 9.85E-32 | 3 | SSC5D     |
| 1.08E-31 | 3 | LRP1      |
| 1.51E-31 | 3 | GSTM3     |
| 1.72E-31 | 3 | DHRS3     |
| 2.07E-31 | 3 | SGCG      |
| 2.54E-31 | 3 | BLVRB     |
| 4.25E-31 | 3 | OS9       |
| 5.50E-31 | 3 | CFH       |
| 6.07E-31 | 3 | LRPAP1    |
| 7.75E-31 | 3 | GABARAPL2 |
| 8.56E-31 | 3 | BDH2      |
| 1.03E-30 | 3 | CSTB      |
| 1.79E-30 | 3 | PALM      |
| 1.81E-30 | 3 | ESD       |
| 2.01E-30 | 3 | TMEM176B  |
| 2.07E-30 | 3 | CD248     |
| 2.33E-30 | 3 | GSTP1     |
| 3.24E-30 | 3 | RARRES1   |
| 1.17E-29 | 3 | FKBP8     |
| 1.60E-29 | 3 | ROBO3     |
| 1.65E-29 | 3 | MATN2     |
| 3.24E-29 | 3 | PLAAT4    |
| 5.15E-29 | 3 | BMP4      |
| 8.73E-29 | 3 | CDKN2C    |
| 9.60E-29 | 3 | ECM1      |
| 1.02E-28 | 3 | CFB       |
| 1.08E-28 | 3 | LAMP1     |
| 1.27E-28 | 3 | TMEM35B   |
| 1.32E-28 | 3 | CD55      |
| 1.64E-28 | 3 | OSR2      |
| 1.99E-28 | 3 | FTL       |
| 2.45E-28 | 3 | QSOX1     |
| 2.46E-28 | 3 | PEBP1     |

|          |   |          |
|----------|---|----------|
| 3.81E-28 | 3 | TOMM7    |
| 7.13E-28 | 3 | MXRA8    |
| 2.00E-27 | 3 | HLA-E    |
| 2.51E-27 | 3 | ANG      |
| 3.49E-27 | 3 | SGCE     |
| 3.95E-27 | 3 | TCF21    |
| 5.08E-27 | 3 | SSPN     |
| 6.57E-27 | 3 | TFPI     |
| 6.64E-27 | 3 | CYP27A1  |
| 7.17E-27 | 3 | SDCBP    |
| 7.35E-27 | 3 | IGFBP4   |
| 9.16E-27 | 3 | HSD11B1  |
| 1.18E-26 | 3 | SLC29A1  |
| 2.26E-26 | 3 | ADI1     |
| 2.67E-26 | 3 | ADD3     |
| 3.62E-26 | 3 | REX1BD   |
| 4.78E-26 | 3 | CBR3     |
| 7.08E-26 | 3 | COL14A1  |
| 7.53E-26 | 3 | GAS1     |
| 8.26E-26 | 3 | SOD1     |
| 9.05E-26 | 3 | HEXB     |
| 9.45E-26 | 3 | SH3BP5   |
| 9.75E-26 | 3 | RTN4     |
| 1.35E-25 | 3 | ADAM33   |
| 1.45E-25 | 3 | PLP2     |
| 1.77E-25 | 3 | FKBP1A   |
| 1.93E-25 | 3 | LEPR     |
| 2.35E-25 | 3 | CLTB     |
| 2.59E-25 | 3 | EID1     |
| 3.13E-25 | 3 | RACK1    |
| 3.82E-25 | 3 | CNBP     |
| 4.18E-25 | 3 | GALNT15  |
| 4.95E-25 | 3 | ABCA6    |
| 5.40E-25 | 3 | CALHM2   |
| 5.81E-25 | 3 | BCHE     |
| 5.92E-25 | 3 | LRP10    |
| 6.09E-25 | 3 | WIF1     |
| 6.82E-25 | 3 | NOP53    |
| 1.23E-24 | 3 | AOX1     |
| 1.81E-24 | 3 | NOVA1    |
| 3.49E-24 | 3 | SELENBP1 |
| 3.54E-24 | 3 | LY6E     |
| 4.35E-24 | 3 | TNFSF10  |



|          |   |          |
|----------|---|----------|
| 4.45E-24 | 3 | ANXA5    |
| 4.54E-24 | 3 | TNFSF12  |
| 4.81E-24 | 3 | PCOLCE   |
| 7.99E-24 | 3 | PRNP     |
| 1.10E-23 | 3 | MYL12B   |
| 1.17E-23 | 3 | OAZ1     |
| 1.42E-23 | 3 | CIRBP    |
| 1.51E-23 | 3 | IL17D    |
| 1.54E-23 | 3 | CCDC51   |
| 1.57E-23 | 3 | VKORC1   |
| 2.41E-23 | 3 | TMEM106C |
| 3.53E-23 | 3 | TRIP10   |
| 8.04E-23 | 3 | ADH5     |
| 8.75E-23 | 3 | METRNL   |
| 8.93E-23 | 3 | LUM      |
| 2.44E-22 | 3 | UCHL1    |
| 2.65E-22 | 3 | CITED2   |
| 3.58E-22 | 3 | CD14     |
| 4.66E-22 | 3 | GUSB     |
| 6.33E-22 | 3 | SRI      |
| 7.52E-22 | 3 | MAPK3    |
| 9.12E-22 | 3 | FNDC5    |
| 1.25E-21 | 3 | EIF3F    |
| 1.37E-21 | 3 | CREB5    |
| 1.55E-21 | 3 | CD70     |
| 1.59E-21 | 3 | VIT      |
| 1.70E-21 | 3 | METTL7A  |
| 1.81E-21 | 3 | OLFML1   |
| 2.06E-21 | 3 | TMEM176A |
| 2.40E-21 | 3 | ACKR4    |
| 3.61E-21 | 3 | SULT1A1  |
| 4.13E-21 | 3 | HTRA3    |
| 5.15E-21 | 3 | FIBIN    |
| 6.55E-21 | 3 | GATD3B   |
| 7.34E-21 | 3 | COL6A2   |
| 7.43E-21 | 3 | PLEKHF1  |
| 8.79E-21 | 3 | IGSF8    |
| 1.08E-20 | 3 | TXN      |
| 1.29E-20 | 3 | SMDT1    |
| 1.58E-20 | 3 | CRYL1    |
| 1.89E-20 | 3 | RTN3     |
| 3.21E-20 | 3 | CLIC3    |
| 3.38E-20 | 3 | MYC      |

|          |   |          |
|----------|---|----------|
| 3.74E-20 | 3 | TUBA1B   |
| 4.56E-20 | 3 | GABARAP  |
| 4.66E-20 | 3 | TMEM98   |
| 6.12E-20 | 3 | IGF1     |
| 1.68E-19 | 3 | DDIT4    |
| 1.81E-19 | 3 | MEDAG    |
| 1.84E-19 | 3 | PRCP     |
| 1.91E-19 | 3 | MTCH1    |
| 2.28E-19 | 3 | MMP23B   |
| 4.43E-19 | 3 | PAMR1    |
| 4.63E-19 | 3 | FSTL1    |
| 4.82E-19 | 3 | LMAN2    |
| 5.07E-19 | 3 | ANKRD35  |
| 7.56E-19 | 3 | CPE      |
| 7.66E-19 | 3 | THYN1    |
| 7.90E-19 | 3 | SVBP     |
| 8.01E-19 | 3 | EIF3E    |
| 8.49E-19 | 3 | ERP29    |
| 1.32E-18 | 3 | CKS1B    |
| 1.71E-18 | 3 | GLUL     |
| 3.22E-18 | 3 | SHISA3   |
| 5.77E-18 | 3 | VAMP5    |
| 6.02E-18 | 3 | TMSB4X   |
| 1.13E-17 | 3 | BIN1     |
| 1.15E-17 | 3 | ATP6V0E1 |
| 1.18E-17 | 3 | YPEL3    |
| 1.22E-17 | 3 | IFNGR2   |
| 1.25E-17 | 3 | PPA1     |
| 2.25E-17 | 3 | DNASE2   |
| 2.28E-17 | 3 | C16orf89 |
| 3.05E-17 | 3 | MFGE8    |
| 3.06E-17 | 3 | SNHG29   |
| 3.92E-17 | 3 | CMBL     |
| 4.37E-17 | 3 | ACVRL1   |
| 5.14E-17 | 3 | ISCU     |
| 5.91E-17 | 3 | CHID1    |
| 5.93E-17 | 3 | HSD17B11 |
| 6.01E-17 | 3 | CTSA     |
| 6.78E-17 | 3 | SFRP4    |
| 7.39E-17 | 3 | A4GALT   |
| 7.47E-17 | 3 | MCUB     |
| 1.13E-16 | 3 | FBN1     |
| 1.31E-16 | 3 | XPNPEP2  |

|          |   |          |
|----------|---|----------|
| 2.34E-16 | 3 | TMEM9B   |
| 3.63E-16 | 3 | JAM2     |
| 3.88E-16 | 3 | PROS1    |
| 4.61E-16 | 3 | RARRES2  |
| 5.21E-16 | 3 | ORAI3    |
| 5.22E-16 | 3 | PPL      |
| 5.29E-16 | 3 | TCN2     |
| 5.48E-16 | 3 | PLPP3    |
| 5.60E-16 | 3 | CYB5R3   |
| 6.55E-16 | 3 | NFE2L2   |
| 9.39E-16 | 3 | UROD     |
| 9.70E-16 | 3 | IL33     |
| 1.06E-15 | 3 | WASHC3   |
| 1.08E-15 | 3 | FOXD1    |
| 1.11E-15 | 3 | JTB      |
| 1.20E-15 | 3 | SCN7A    |
| 1.28E-15 | 3 | C1QTNF2  |
| 1.34E-15 | 3 | EFEMP2   |
| 1.46E-15 | 3 | ACE      |
| 1.54E-15 | 3 | NUCB2    |
| 1.99E-15 | 3 | DPP7     |
| 2.46E-15 | 3 | RAB34    |
| 3.05E-15 | 3 | SLC27A3  |
| 3.99E-15 | 3 | BLOC1S1  |
| 5.75E-15 | 3 | SCP2     |
| 6.06E-15 | 3 | FBLN5    |
| 6.70E-15 | 3 | EIF4EBP3 |
| 7.03E-15 | 3 | POLR2E   |
| 8.44E-15 | 3 | CALCRL   |
| 9.11E-15 | 3 | H19      |
| 9.61E-15 | 3 | PYURF    |
| 1.10E-14 | 3 | ZFAS1    |
| 1.12E-14 | 3 | EIF4A2   |
| 1.42E-14 | 3 | NDN      |
| 1.47E-14 | 3 | PGRMC1   |
| 1.63E-14 | 3 | CRTAP    |
| 1.78E-14 | 3 | HEXA     |
| 2.11E-14 | 3 | TMEM179B |
| 2.15E-14 | 3 | CCNDBP1  |
| 2.48E-14 | 3 | CDIPT    |
| 4.09E-14 | 3 | WDR83OS  |
| 4.42E-14 | 3 | G0S2     |
| 4.77E-14 | 3 | ATP6V0C  |

|          |   |           |
|----------|---|-----------|
| 5.07E-14 | 3 | NFIX      |
| 5.22E-14 | 3 | ETFB      |
| 5.58E-14 | 3 | AHNAK     |
| 7.47E-14 | 3 | PDLIM1    |
| 9.01E-14 | 3 | CD151     |
| 9.21E-14 | 3 | MGAT1     |
| 9.37E-14 | 3 | RRAGA     |
| 1.04E-13 | 3 | SH3GLB2   |
| 1.17E-13 | 3 | AKR1B1    |
| 1.78E-13 | 3 | TNFAIP2   |
| 1.98E-13 | 3 | SDF4      |
| 1.99E-13 | 3 | CD320     |
| 2.56E-13 | 3 | NUCB1     |
| 3.35E-13 | 3 | TCEA3     |
| 3.64E-13 | 3 | TMEM91    |
| 3.70E-13 | 3 | TUBB4B    |
| 3.95E-13 | 3 | PCBD1     |
| 4.07E-13 | 3 | CD68      |
| 5.08E-13 | 3 | SDHD      |
| 6.15E-13 | 3 | DDOST     |
| 7.13E-13 | 3 | ANXA7     |
| 7.21E-13 | 3 | PRSS23    |
| 8.01E-13 | 3 | GNB2      |
| 8.90E-13 | 3 | TRAC      |
| 1.02E-12 | 3 | CDC42EP2  |
| 1.29E-12 | 3 | TMBIM1    |
| 1.38E-12 | 3 | SNRPN     |
| 2.17E-12 | 3 | FUCA2     |
| 4.89E-12 | 3 | TMED4     |
| 4.90E-12 | 3 | TUBA1A    |
| 5.05E-12 | 3 | RNF187    |
| 5.26E-12 | 3 | ALDH1A3   |
| 5.72E-12 | 3 | PSME1     |
| 5.89E-12 | 3 | RAB11B    |
| 7.45E-12 | 3 | GABARAPL1 |
| 8.38E-12 | 3 | HMGN3     |
| 8.58E-12 | 3 | RSPO3     |
| 9.77E-12 | 3 | THBS3     |
| 1.37E-11 | 3 | ECI2      |
| 1.49E-11 | 3 | STMN3     |
| 1.54E-11 | 3 | APOL1     |
| 1.64E-11 | 3 | SLC66A3   |
| 1.80E-11 | 3 | CD40      |

|          |   |              |
|----------|---|--------------|
| 1.89E-11 | 3 | ZNF706       |
| 2.23E-11 | 3 | PIK3R1       |
| 2.42E-11 | 3 | VAMP2        |
| 2.89E-11 | 3 | ITGB1BP1     |
| 2.95E-11 | 3 | ADAMTS5      |
| 3.99E-11 | 3 | HEBP1        |
| 4.40E-11 | 3 | SPTBN1       |
| 5.05E-11 | 3 | SDC2         |
| 7.25E-11 | 3 | HIGD2A       |
| 8.01E-11 | 3 | CBR1         |
| 9.52E-11 | 3 | MRFAP1       |
| 9.90E-11 | 3 | PPT1         |
| 1.02E-10 | 3 | HPGD         |
| 1.36E-10 | 3 | GLIPR2       |
| 1.49E-10 | 3 | CERCAM       |
| 1.74E-10 | 3 | GPRC5A       |
| 1.75E-10 | 3 | PXDC1        |
| 3.82E-10 | 3 | ARAP1        |
| 5.74E-10 | 3 | CUTC         |
| 6.45E-10 | 3 | GAS6         |
| 6.72E-10 | 3 | RDH14        |
| 7.33E-10 | 3 | GXYLT2       |
| 8.25E-10 | 3 | ST3GAL4      |
| 1.38E-09 | 3 | NCSTN        |
| 1.58E-09 | 3 | TENT5A       |
| 2.54E-09 | 3 | DDIT3        |
| 2.58E-09 | 3 | ACTR10       |
| 5.38E-09 | 3 | BDKRB1       |
| 5.47E-09 | 3 | TMEM100      |
| 7.01E-09 | 3 | EPB41L4A-AS1 |
| 1.27E-08 | 3 | WNT2B        |
| 1.31E-08 | 3 | IL15RA       |
| 1.39E-08 | 3 | RHOB         |
| 1.53E-08 | 3 | PCYOX1       |
| 2.16E-08 | 3 | LINC01140    |
| 2.82E-08 | 3 | ITM2C        |
| 3.58E-08 | 3 | H1FX         |
| 3.79E-08 | 3 | CAPN2        |
| 3.85E-08 | 3 | SOCS1        |
| 6.14E-08 | 3 | LOXL1        |
| 8.17E-08 | 3 | SNX21        |
| 9.49E-08 | 3 | ALDH9A1      |
| 1.28E-07 | 3 | SPRY1        |

|             |   |         |
|-------------|---|---------|
| 1.36E-07    | 3 | CDKN1C  |
| 1.48E-07    | 3 | BSG     |
| 1.51E-07    | 3 | FKBP7   |
| 3.60E-07    | 3 | LARP6   |
| 5.02E-07    | 3 | HIC1    |
| 6.37E-07    | 3 | LAMP2   |
| 8.19E-07    | 3 | RECK    |
| 9.48E-07    | 3 | C2      |
| 1.20E-06    | 3 | ARL4D   |
| 2.00E-06    | 3 | MRC2    |
| 2.62E-06    | 3 | TUBB2A  |
| 2.70E-06    | 3 | APOD    |
| 2.77E-06    | 3 | NBL1    |
| 2.80E-06    | 3 | HELLPAR |
| 3.26E-06    | 3 | C7      |
| 4.03E-06    | 3 | PNRC1   |
| 4.31E-06    | 3 | FXVD6   |
| 4.73E-06    | 3 | AGTRAP  |
| 8.46E-06    | 3 | CCS     |
| 9.69E-06    | 3 | EIF1B   |
| 3.13E-05    | 3 | F3      |
| 0.0001307   | 3 | MYADM   |
| 0.0006592   | 3 | MMP2    |
| 0.001145867 | 3 | INMT    |
| 0.00193026  | 3 | EMP1    |
| 0.004551535 | 3 | UGDH    |
| 0.036646337 | 3 | CAMK2N1 |
| 0.067667989 | 3 | VASN    |
| 0.133990044 | 3 | CES1    |
| 0.213409613 | 3 | CSRNP1  |
| 1           | 3 | IGLC2   |

Sheet 3: Endothelial cells

| <b>Endothelial cell</b> | <b>p_val</b> | <b>avg_log2FC</b> | <b>pct.1</b> | <b>pct.2</b> |
|-------------------------|--------------|-------------------|--------------|--------------|
| ACKR1                   | 4.92E-185    | 2.146961348       | 0.974        | 0.336        |
| ZNF385D                 | 5.95E-162    | 1.797973109       | 0.99         | 0.601        |
| TLL1                    | 1.59E-161    | 2.253103288       | 0.86         | 0.254        |
| IL1R1                   | 7.86E-139    | 1.575239708       | 0.837        | 0.269        |
| SELP                    | 1.26E-134    | 1.291537432       | 0.804        | 0.204        |
| LRRC1                   | 5.11E-119    | 1.400721406       | 0.819        | 0.286        |
| CCL14                   | 7.96E-115    | 1.960919642       | 0.824        | 0.33         |
| NCOA7                   | 1.79E-110    | 1.233572983       | 0.957        | 0.675        |
| EPB41L3                 | 6.26E-102    | 1.381226841       | 0.777        | 0.283        |
| ADGRG6                  | 1.19E-96     | 1.148660342       | 0.53         | 0.077        |
| CLU                     | 8.87E-94     | 1.55703769        | 0.829        | 0.368        |
| CD74                    | 1.59E-89     | 1.094521217       | 0.983        | 0.77         |
| CNKSR3                  | 2.11E-88     | 1.49153203        | 0.892        | 0.58         |
| RAB3C                   | 2.75E-87     | 1.075463748       | 0.508        | 0.083        |
| ELOVL7                  | 4.09E-86     | 1.2685871         | 0.752        | 0.32         |
| RALGAPA2                | 6.59E-84     | 1.146973766       | 0.988        | 0.813        |
| ICAM1                   | 1.10E-82     | 1.294454468       | 0.884        | 0.545        |
| TSPAN7                  | 1.38E-82     | 1.054314176       | 0.848        | 0.479        |
| HIPK3                   | 2.92E-82     | 1.025891726       | 0.96         | 0.741        |
| MYRIP                   | 4.27E-82     | 1.2755714         | 0.753        | 0.271        |
| LIFR                    | 8.74E-82     | 1.11568143        | 0.873        | 0.449        |
| CCSER1                  | 1.71E-81     | 1.459592912       | 0.519        | 0.107        |
| POSTN                   | 3.95E-81     | 1.627111456       | 0.659        | 0.221        |
| HLA-DQA1                | 1.33E-80     | 1.048552604       | 0.646        | 0.202        |
| SOD2                    | 3.44E-80     | 1.437266785       | 0.887        | 0.641        |
| ABLIM1                  | 2.71E-79     | 1.06117914        | 0.983        | 0.824        |
| ADIRF                   | 3.15E-78     | 0.890588481       | 0.838        | 0.437        |
| HLA-DRA                 | 5.36E-78     | 1.079381066       | 0.914        | 0.61         |
| EVA1C                   | 8.23E-78     | 0.97377792        | 0.928        | 0.621        |
| OLFM1                   | 3.72E-76     | 0.908616891       | 0.652        | 0.236        |
| TPD52L1                 | 1.91E-75     | 0.864114835       | 0.682        | 0.251        |
| SELE                    | 2.84E-75     | 1.624098881       | 0.674        | 0.243        |
| CADM3-AS1               | 8.04E-75     | 0.710168072       | 0.436        | 0.062        |
| CELF2                   | 2.53E-74     | 1.132535712       | 0.783        | 0.374        |
| HLA-DRB1                | 1.37E-72     | 1.051760605       | 0.934        | 0.702        |
| NPC2                    | 1.67E-72     | 0.896583615       | 0.841        | 0.561        |
| HAPLN3                  | 6.10E-72     | 0.694107974       | 0.619        | 0.212        |
| TGFBR3                  | 8.09E-71     | 1.092919564       | 0.836        | 0.482        |
| DAPK1                   | 1.54E-70     | 0.935838569       | 0.509        | 0.12         |
| HDAC9                   | 1.66E-70     | 1.264322296       | 0.605        | 0.205        |
| NNMT                    | 6.09E-70     | 0.833301756       | 0.919        | 0.636        |

|            |          |             |       |       |
|------------|----------|-------------|-------|-------|
| DAAM1      | 8.00E-70 | 0.910078132 | 0.834 | 0.512 |
| TFPI       | 4.54E-66 | 0.475148363 | 0.859 | 0.501 |
| NAMPT      | 6.61E-65 | 0.942415417 | 0.94  | 0.73  |
| IL33       | 1.17E-63 | 0.716596025 | 0.727 | 0.302 |
| CCL23      | 1.70E-62 | 1.01490813  | 0.355 | 0.044 |
| HLA-DPB1   | 1.70E-62 | 0.875374129 | 0.842 | 0.541 |
| SIK2       | 2.77E-62 | 0.985344531 | 0.878 | 0.586 |
| SNTG2      | 5.24E-62 | 0.956237082 | 0.908 | 0.612 |
| HLA-DQA2   | 9.76E-62 | 0.886801528 | 0.496 | 0.133 |
| HLA-DQB1   | 8.00E-61 | 0.758928454 | 0.711 | 0.337 |
| HLA-DPA1   | 1.04E-60 | 0.827842704 | 0.838 | 0.553 |
| CYTH1      | 5.63E-59 | 0.791278445 | 0.927 | 0.694 |
| KLF7       | 3.96E-58 | 0.879202318 | 0.93  | 0.693 |
| AL078604.4 | 4.02E-58 | 1.501936492 | 0.551 | 0.213 |
| IL6        | 2.56E-57 | 1.171259851 | 0.405 | 0.089 |
| CPXM2      | 4.36E-56 | 0.880707419 | 0.729 | 0.417 |
| MRTFB      | 1.97E-55 | 0.848779664 | 0.963 | 0.716 |
| BNC2       | 1.23E-54 | 0.85211298  | 0.716 | 0.374 |
| PLEKHA7    | 3.49E-54 | 0.72190566  | 0.683 | 0.338 |
| VWF        | 1.39E-53 | 0.713492721 | 0.995 | 0.824 |
| C1QTNF1    | 3.54E-53 | 0.603468137 | 0.388 | 0.084 |
| ARHGAP26   | 5.01E-53 | 1.026202107 | 0.941 | 0.739 |
| MYOF       | 7.61E-52 | 0.62905286  | 0.902 | 0.616 |
| MCTP1      | 2.33E-51 | 0.801658563 | 0.991 | 0.804 |
| UGCG       | 4.99E-51 | 0.777042101 | 0.848 | 0.607 |
| DNM3       | 1.20E-50 | 0.892414718 | 0.792 | 0.485 |
| YBX3       | 1.32E-50 | 0.642305278 | 0.979 | 0.844 |
| PERP       | 1.95E-50 | 0.618080217 | 0.515 | 0.185 |
| SAMD4A     | 4.23E-49 | 0.92677322  | 0.86  | 0.583 |
| DOC2B      | 7.29E-49 | 0.589740844 | 0.693 | 0.366 |
| TESC       | 7.39E-49 | 0.584353003 | 0.463 | 0.148 |
| FOXP1      | 3.35E-48 | 0.677144951 | 0.982 | 0.831 |
| SDCBP      | 1.02E-47 | 0.642822145 | 0.906 | 0.707 |
| DUSP23     | 2.69E-47 | 0.671150771 | 0.787 | 0.496 |
| ACTN1      | 3.20E-47 | 0.554104297 | 0.892 | 0.616 |
| PDIA5      | 8.23E-47 | 0.585997549 | 0.589 | 0.272 |
| SERPINA3   | 1.34E-46 | 0.923101116 | 0.268 | 0.029 |
| TPO        | 1.50E-46 | 0.974072583 | 0.676 | 0.34  |
| TACR1      | 1.95E-46 | 0.814732786 | 0.498 | 0.176 |
| ITPKC      | 1.97E-46 | 0.836780298 | 0.687 | 0.38  |
| PRXL2A     | 2.21E-46 | 0.628440434 | 0.734 | 0.462 |
| PLSCR4     | 4.00E-46 | 0.813626685 | 0.65  | 0.309 |
| NPAS3      | 1.67E-45 | 1.162839208 | 0.387 | 0.107 |



|            |          |             |       |       |
|------------|----------|-------------|-------|-------|
| CTSC       | 1.04E-44 | 0.803111363 | 0.692 | 0.398 |
| VCAM1      | 1.14E-44 | 1.040897601 | 0.503 | 0.199 |
| C7         | 1.16E-44 | 0.818469904 | 0.253 | 0.028 |
| FBLN2      | 3.44E-44 | 0.449892436 | 0.498 | 0.162 |
| BIRC3      | 3.77E-44 | 0.658825374 | 0.51  | 0.195 |
| C2CD4B     | 5.84E-44 | 1.119828664 | 0.576 | 0.282 |
| SH3BP5     | 6.79E-44 | 0.597679123 | 0.871 | 0.63  |
| CSF3       | 2.07E-43 | 1.095227153 | 0.282 | 0.045 |
| TGFBR2     | 2.30E-43 | 0.76059928  | 0.966 | 0.838 |
| RAB27A     | 2.51E-43 | 0.613588733 | 0.657 | 0.353 |
| CST3       | 3.26E-43 | 0.618443057 | 0.951 | 0.828 |
| PLCB4      | 1.29E-42 | 0.548679471 | 0.889 | 0.628 |
| HLA-DMA    | 1.36E-42 | 0.561383699 | 0.709 | 0.405 |
| MEOX2      | 2.94E-42 | 0.764469624 | 0.475 | 0.176 |
| SLC8A1     | 5.07E-42 | 0.781127645 | 0.51  | 0.203 |
| MYCBP2     | 1.16E-41 | 0.64505744  | 0.92  | 0.724 |
| PVT1       | 1.44E-41 | 0.706398273 | 0.7   | 0.394 |
| CPVL       | 2.61E-41 | 0.36190105  | 0.299 | 0.057 |
| SPARCL1    | 2.97E-41 | 0.594913889 | 0.99  | 0.863 |
| HLA-DOA    | 1.12E-40 | 0.379896899 | 0.268 | 0.042 |
| ZBTB20     | 1.63E-40 | 0.65948818  | 0.99  | 0.847 |
| FNIP2      | 2.44E-40 | 0.726084748 | 0.816 | 0.571 |
| AL589693.1 | 4.39E-40 | 0.926008156 | 0.482 | 0.192 |
| ADAMTS9    | 6.81E-40 | 1.135974868 | 0.876 | 0.705 |
| CARMIL1    | 7.98E-40 | 0.593618472 | 0.559 | 0.245 |
| LRATD2     | 9.75E-40 | 0.433794974 | 0.435 | 0.156 |
| ST6GAL1    | 2.20E-39 | 0.764566856 | 0.825 | 0.584 |
| PDLIM1     | 3.60E-39 | 0.489193753 | 0.973 | 0.857 |
| CSF2RB     | 1.29E-38 | 0.579307135 | 0.491 | 0.212 |
| CNTNAP3B   | 1.66E-38 | 0.70426649  | 0.748 | 0.465 |
| CPE        | 2.01E-38 | 1.394146926 | 0.273 | 0.055 |
| LYST       | 2.43E-38 | 1.084227204 | 0.672 | 0.43  |
| LINC02147  | 2.64E-38 | 1.359918747 | 0.379 | 0.121 |
| PCDH19     | 3.22E-38 | 0.539160075 | 0.269 | 0.05  |
| SNAP25     | 3.35E-38 | 0.619830343 | 0.333 | 0.09  |
| KCTD12     | 5.80E-38 | 0.362617979 | 0.814 | 0.539 |
| AF064858.1 | 5.94E-38 | 0.614680658 | 0.304 | 0.075 |
| ARNTL2     | 6.09E-38 | 0.548567214 | 0.494 | 0.215 |
| CCDC68     | 6.73E-38 | 0.469162592 | 0.433 | 0.153 |
| TNFRSF10B  | 9.24E-38 | 0.611864225 | 0.802 | 0.55  |
| SPATA6L    | 1.82E-37 | 0.649010762 | 0.504 | 0.228 |
| SNCG       | 4.17E-37 | 0.478288819 | 0.676 | 0.393 |
| SESN3      | 6.69E-37 | 0.778473201 | 0.581 | 0.304 |

|           |          |             |       |       |
|-----------|----------|-------------|-------|-------|
| NR2F2     | 2.23E-36 | 0.524664488 | 0.7   | 0.385 |
| SSH1      | 6.84E-36 | 0.757582947 | 0.853 | 0.667 |
| CCDC69    | 9.91E-36 | 0.445072126 | 0.657 | 0.39  |
| MAP3K8    | 1.03E-35 | 0.572683511 | 0.745 | 0.48  |
| SLC1A1    | 2.78E-35 | 0.565690883 | 0.384 | 0.13  |
| RORA      | 3.93E-35 | 0.634867998 | 0.882 | 0.644 |
| MECOM     | 5.65E-35 | 0.552996989 | 0.962 | 0.731 |
| PDK4      | 7.44E-35 | 0.863611282 | 0.676 | 0.409 |
| SLC4A7    | 1.31E-34 | 0.712588503 | 0.712 | 0.445 |
| FAM155A   | 2.13E-34 | 0.964607194 | 0.794 | 0.536 |
| SAMD5     | 3.61E-34 | 0.615832115 | 0.4   | 0.149 |
| DOCK11    | 4.23E-34 | 0.558373739 | 0.323 | 0.091 |
| ADAM23    | 7.63E-34 | 0.505809228 | 0.29  | 0.073 |
| CLEC1A    | 8.17E-34 | 0.525312184 | 0.652 | 0.389 |
| SETBP1    | 8.59E-34 | 0.850621836 | 0.439 | 0.182 |
| CORO2A    | 8.78E-34 | 0.390908669 | 0.285 | 0.069 |
| IER3      | 1.51E-33 | 0.996745189 | 0.727 | 0.521 |
| SRSF4     | 2.52E-33 | 0.397970908 | 0.903 | 0.731 |
| NR2F2-AS1 | 2.72E-33 | 0.662020414 | 0.443 | 0.18  |
| PIM3      | 2.87E-33 | 0.559507112 | 0.743 | 0.506 |
| RBP5      | 2.88E-33 | 0.310159387 | 0.326 | 0.095 |
| ZFPM2     | 4.53E-33 | 0.578019702 | 0.7   | 0.435 |
| PLSCR1    | 5.96E-33 | 0.470553765 | 0.865 | 0.657 |
| HLA-DRB5  | 7.62E-33 | 0.865209613 | 0.611 | 0.363 |
| ZFAND5    | 8.68E-33 | 0.567898048 | 0.862 | 0.68  |
| CYP1B1    | 1.10E-32 | 0.677007965 | 0.365 | 0.124 |
| TNFAIP3   | 1.14E-32 | 0.819876896 | 0.704 | 0.437 |
| TMTC1     | 1.30E-32 | 0.646098909 | 0.907 | 0.658 |
| SYT15     | 1.56E-32 | 0.326491444 | 0.259 | 0.056 |
| IRAK3     | 2.01E-32 | 0.609775685 | 0.804 | 0.582 |
| CDC42EP3  | 2.01E-32 | 0.497152337 | 0.838 | 0.614 |
| C21orf91  | 3.03E-32 | 0.43099189  | 0.459 | 0.21  |
| LINC-PINT | 4.93E-32 | 0.548534618 | 0.617 | 0.363 |
| PBX1      | 6.33E-32 | 0.64799389  | 0.646 | 0.39  |
| WTAP      | 7.54E-32 | 0.565130907 | 0.787 | 0.592 |
| PCAT1     | 7.67E-32 | 0.694816312 | 0.578 | 0.307 |
| TMTC2     | 1.23E-31 | 0.692389906 | 0.619 | 0.359 |
| LHFPL2    | 2.10E-31 | 0.633006015 | 0.588 | 0.353 |
| CA8       | 2.50E-31 | 0.715501396 | 0.41  | 0.165 |
| CRIM1     | 2.99E-31 | 0.683573469 | 0.951 | 0.778 |
| SHB       | 4.09E-31 | 0.606731895 | 0.67  | 0.428 |
| GAS5      | 5.22E-31 | 0.389656243 | 0.881 | 0.714 |
| NFKBIZ    | 6.08E-31 | 0.463525762 | 0.83  | 0.578 |

|             |          |             |       |       |
|-------------|----------|-------------|-------|-------|
| PHLDA1      | 1.07E-30 | 0.616474893 | 0.58  | 0.34  |
| TPK1        | 1.16E-30 | 0.552641674 | 0.532 | 0.272 |
| HIVEP1      | 1.51E-30 | 0.634997801 | 0.759 | 0.522 |
| PTAFR       | 2.19E-30 | 0.368657877 | 0.284 | 0.076 |
| SGMS2       | 3.31E-30 | 0.658193217 | 0.33  | 0.112 |
| SH3BGRL2    | 4.14E-30 | 0.482018828 | 0.634 | 0.374 |
| MBNL1       | 4.27E-30 | 0.581091952 | 0.985 | 0.858 |
| AC011511.2  | 7.29E-30 | 0.580111513 | 0.494 | 0.249 |
| FRY         | 8.51E-30 | 0.484242329 | 0.776 | 0.534 |
| PRCP        | 1.07E-29 | 0.32322805  | 0.852 | 0.57  |
| SERPINB1    | 1.22E-29 | 0.4390227   | 0.668 | 0.442 |
| SYNE2       | 1.48E-29 | 0.428480042 | 0.971 | 0.811 |
| PKP4        | 1.62E-29 | 0.472642919 | 0.951 | 0.74  |
| MEOX1       | 2.11E-29 | 0.443172943 | 0.514 | 0.248 |
| ATP8B1      | 3.11E-29 | 0.587298165 | 0.837 | 0.616 |
| CFB         | 5.57E-29 | 0.289571757 | 0.28  | 0.077 |
| RFX2        | 1.02E-28 | 0.671006741 | 0.75  | 0.521 |
| GATA6       | 1.23E-28 | 0.464353339 | 0.286 | 0.088 |
| ZNF608      | 1.31E-28 | 0.511886152 | 0.559 | 0.298 |
| MMP16       | 2.07E-28 | 0.53288979  | 0.389 | 0.157 |
| IGFBP4      | 3.05E-28 | 0.4356155   | 0.957 | 0.818 |
| SOCS2       | 3.34E-28 | 0.323136264 | 0.595 | 0.342 |
| ASPH        | 4.40E-28 | 0.429361456 | 0.808 | 0.593 |
| DENND4A     | 5.37E-28 | 0.628703883 | 0.858 | 0.66  |
| LHX6        | 7.15E-28 | 0.359874116 | 0.395 | 0.168 |
| ADAMTS9-AS1 | 1.03E-27 | 0.584973272 | 0.351 | 0.14  |
| CYGB        | 1.07E-27 | 0.349612014 | 0.322 | 0.108 |
| LRIG3       | 1.42E-27 | 0.504785925 | 0.427 | 0.2   |
| NOP53       | 1.70E-27 | 0.330123739 | 0.875 | 0.723 |
| TMEM273     | 2.21E-27 | 0.395004002 | 0.561 | 0.307 |
| RND1        | 2.78E-27 | 0.427030023 | 0.439 | 0.202 |
| SPTLC2      | 3.09E-27 | 0.57688496  | 0.722 | 0.515 |
| LPCAT4      | 3.68E-27 | 0.353418953 | 0.337 | 0.126 |
| GMDS        | 4.66E-27 | 0.542409292 | 0.856 | 0.642 |
| MKLN1       | 4.89E-27 | 0.552363419 | 0.894 | 0.734 |
| ETS2        | 5.60E-27 | 0.392933963 | 0.952 | 0.801 |
| FOXO1       | 6.36E-27 | 0.524042693 | 0.918 | 0.725 |
| AKAP12      | 9.95E-27 | 0.528039891 | 0.596 | 0.302 |
| CSRP2       | 1.37E-26 | 0.425540905 | 0.584 | 0.352 |
| AASS        | 1.53E-26 | 0.376848196 | 0.504 | 0.272 |
| CTNNAL1     | 1.58E-26 | 0.46541528  | 0.655 | 0.422 |
| CCNL1       | 1.59E-26 | 0.393119108 | 0.914 | 0.73  |
| FRMD3       | 2.61E-26 | 0.613783012 | 0.354 | 0.143 |

|            |          |             |       |       |
|------------|----------|-------------|-------|-------|
| IGF2BP2    | 2.99E-26 | 0.436644959 | 0.492 | 0.251 |
| IL6ST      | 3.13E-26 | 0.401858066 | 0.967 | 0.831 |
| AC016831.7 | 3.28E-26 | 0.558052856 | 0.599 | 0.371 |
| KLF9       | 3.89E-26 | 0.406392407 | 0.858 | 0.686 |
| NFKB1      | 1.11E-25 | 0.483090768 | 0.808 | 0.615 |
| MET        | 1.15E-25 | 0.46507615  | 0.594 | 0.351 |
| GNG12      | 1.19E-25 | 0.394271576 | 0.737 | 0.481 |
| RELL1      | 1.20E-25 | 0.428993881 | 0.793 | 0.601 |
| SH3RF3     | 1.45E-25 | 0.559989197 | 0.765 | 0.537 |
| PPP3CA     | 2.04E-25 | 0.596442338 | 0.939 | 0.797 |
| IPCEF1     | 2.18E-25 | 0.793275236 | 0.321 | 0.123 |
| SASH1      | 2.26E-25 | 0.483997984 | 0.982 | 0.814 |
| LHFPL6     | 2.62E-25 | 0.465249508 | 0.856 | 0.67  |
| BACE2      | 2.81E-25 | 0.624223183 | 0.832 | 0.681 |
| GNA14      | 3.07E-25 | 0.692442935 | 0.671 | 0.442 |
| GNB4       | 3.27E-25 | 0.440495033 | 0.709 | 0.489 |
| EXOC6      | 3.52E-25 | 0.52066359  | 0.742 | 0.513 |
| FOXC1      | 4.35E-25 | 0.427523547 | 0.557 | 0.326 |
| RHOU       | 4.52E-25 | 0.527056422 | 0.4   | 0.187 |
| DNMBP      | 4.60E-25 | 0.455644258 | 0.482 | 0.258 |
| FAM241A    | 6.67E-25 | 0.5108902   | 0.765 | 0.52  |
| NOCT       | 7.78E-25 | 0.442900144 | 0.483 | 0.257 |
| ANO2       | 8.75E-25 | 0.401208054 | 0.848 | 0.583 |
| SYBU       | 9.74E-25 | 0.445047334 | 0.431 | 0.202 |
| RELB       | 1.04E-24 | 0.412216411 | 0.65  | 0.412 |
| BMERB1     | 1.70E-24 | 0.444682357 | 0.659 | 0.434 |
| VCAN       | 1.75E-24 | 0.677195014 | 0.341 | 0.14  |
| JAM2       | 1.78E-24 | 0.358705136 | 0.84  | 0.625 |
| SLC16A7    | 2.24E-24 | 0.483803179 | 0.506 | 0.283 |
| ADGRL4     | 2.75E-24 | 0.480515093 | 0.987 | 0.83  |
| ENPP2      | 3.46E-24 | 0.337180319 | 0.504 | 0.261 |
| SGMS1      | 4.32E-24 | 0.453087744 | 0.679 | 0.462 |
| SPHK1      | 4.58E-24 | 0.262723612 | 0.432 | 0.206 |
| TSHZ2      | 5.76E-24 | 0.48453822  | 0.978 | 0.812 |
| IL15       | 7.90E-24 | 0.475391282 | 0.542 | 0.311 |
| HDGFL3     | 8.60E-24 | 0.39497178  | 0.809 | 0.618 |
| IRF1       | 8.92E-24 | 0.587779567 | 0.709 | 0.506 |
| AL033504.1 | 1.03E-23 | 0.580232891 | 0.269 | 0.092 |
| ABLIM3     | 1.08E-23 | 0.380517822 | 0.635 | 0.379 |
| B4GALT5    | 1.17E-23 | 0.434298364 | 0.654 | 0.44  |
| RAP1B      | 1.39E-23 | 0.382318805 | 0.946 | 0.813 |
| OSBPL10    | 1.49E-23 | 0.532664479 | 0.652 | 0.428 |
| HLA-DMB    | 1.91E-23 | 0.289670111 | 0.395 | 0.179 |

|             |          |             |       |       |
|-------------|----------|-------------|-------|-------|
| NRN1        | 2.19E-23 | 0.340785696 | 0.623 | 0.394 |
| ZFP36L1     | 2.22E-23 | 0.42795989  | 0.884 | 0.722 |
| PLA1A       | 2.58E-23 | 0.412462792 | 0.312 | 0.124 |
| TRPM6       | 4.19E-23 | 0.415919495 | 0.35  | 0.15  |
| OSMR        | 4.31E-23 | 0.43777597  | 0.7   | 0.48  |
| DOCK4       | 4.86E-23 | 0.413671099 | 0.98  | 0.796 |
| CEMIP2      | 5.17E-23 | 0.536549406 | 0.891 | 0.704 |
| NEURL1B     | 5.29E-23 | 0.327787849 | 0.528 | 0.288 |
| ICAM4       | 6.63E-23 | 0.28159467  | 0.279 | 0.101 |
| TEAD1       | 6.85E-23 | 0.412611022 | 0.848 | 0.645 |
| FKBP5       | 1.15E-22 | 0.497492112 | 0.782 | 0.568 |
| ATP11C      | 1.31E-22 | 0.402618961 | 0.749 | 0.556 |
| CFLAR       | 1.65E-22 | 0.34373839  | 0.903 | 0.754 |
| SLC7A1      | 1.86E-22 | 0.402020535 | 0.491 | 0.27  |
| ABCG2       | 2.18E-22 | 0.326062113 | 0.371 | 0.16  |
| PELI2       | 2.90E-22 | 0.562223726 | 0.683 | 0.475 |
| NFATC2      | 3.01E-22 | 0.525390626 | 0.737 | 0.518 |
| SEMA6A      | 3.47E-22 | 0.404737414 | 0.627 | 0.398 |
| MCUB        | 3.49E-22 | 0.413736185 | 0.586 | 0.353 |
| CPD         | 3.73E-22 | 0.333084425 | 0.67  | 0.452 |
| LITAF       | 4.45E-22 | 0.573507846 | 0.553 | 0.347 |
| PLXDC2      | 4.50E-22 | 0.375689221 | 0.782 | 0.536 |
| LINC01197   | 5.56E-22 | 0.320542875 | 0.316 | 0.126 |
| PALM2-AKAP2 | 6.56E-22 | 0.46698422  | 0.955 | 0.822 |
| CLDN5       | 7.17E-22 | 0.368877457 | 0.871 | 0.667 |
| SNCA        | 7.82E-22 | 0.444544129 | 0.376 | 0.172 |
| ADM5        | 9.63E-22 | 0.459171097 | 0.36  | 0.165 |
| MIR99AHG    | 9.63E-22 | 0.825800534 | 0.278 | 0.104 |
| ARAP2       | 1.12E-21 | 0.360396709 | 0.378 | 0.176 |
| USP36       | 1.17E-21 | 0.287375224 | 0.559 | 0.347 |
| BMPR2       | 1.24E-21 | 0.418150062 | 0.974 | 0.808 |
| ITSN1       | 1.46E-21 | 0.474589871 | 0.529 | 0.325 |
| IL4R        | 1.82E-21 | 0.457419148 | 0.721 | 0.531 |
| CMIP        | 1.92E-21 | 0.342755812 | 0.935 | 0.761 |
| ZC3H12A     | 2.02E-21 | 0.292050916 | 0.311 | 0.129 |
| TNFRSF10D   | 2.20E-21 | 0.4520138   | 0.846 | 0.636 |
| GNS         | 2.37E-21 | 0.352663238 | 0.63  | 0.433 |
| TNFRSF1A    | 2.55E-21 | 0.351657005 | 0.709 | 0.518 |
| DIXDC1      | 3.11E-21 | 0.360577832 | 0.515 | 0.289 |
| PEAK1       | 3.26E-21 | 0.519888982 | 0.867 | 0.692 |
| PABPC1      | 3.89E-21 | 0.285557242 | 0.949 | 0.851 |
| BAZ1A       | 3.93E-21 | 0.395686456 | 0.8   | 0.637 |
| TNFRSF6B    | 4.83E-21 | 0.399309222 | 0.525 | 0.304 |

|            |          |             |       |       |
|------------|----------|-------------|-------|-------|
| RNF122     | 4.97E-21 | 0.518843661 | 0.416 | 0.214 |
| CLIP1      | 7.00E-21 | 0.315764548 | 0.709 | 0.502 |
| MED13L     | 7.31E-21 | 0.444430779 | 0.951 | 0.806 |
| AP002518.2 | 7.36E-21 | 0.345785079 | 0.313 | 0.13  |
| SMAD3      | 7.60E-21 | 0.806926459 | 0.649 | 0.459 |
| ZNRF1      | 8.39E-21 | 0.383006684 | 0.628 | 0.436 |
| TMEM54     | 1.12E-20 | 0.251067118 | 0.271 | 0.1   |
| EPS8       | 1.17E-20 | 0.468803932 | 0.772 | 0.575 |
| ERRFI1     | 1.26E-20 | 0.509307173 | 0.408 | 0.211 |
| CSRN1P1    | 1.84E-20 | 0.383254715 | 0.579 | 0.362 |
| SLCO3A1    | 1.99E-20 | 0.432446927 | 0.665 | 0.463 |
| HIVEP2     | 2.28E-20 | 0.553940835 | 0.771 | 0.605 |
| AKT3       | 2.45E-20 | 0.369618827 | 0.958 | 0.794 |
| SLC1A5     | 2.47E-20 | 0.266760365 | 0.426 | 0.23  |
| TPT1       | 2.53E-20 | 0.361761578 | 0.995 | 0.967 |
| LY6E       | 3.50E-20 | 0.475695769 | 0.737 | 0.546 |
| ESYT2      | 4.12E-20 | 0.414545925 | 0.881 | 0.698 |
| SNHG29     | 4.72E-20 | 0.302356529 | 0.874 | 0.756 |
| TEX14      | 4.75E-20 | 0.447048658 | 0.48  | 0.266 |
| PARD3      | 5.48E-20 | 0.359902514 | 0.545 | 0.322 |
| ARL4A      | 5.72E-20 | 0.25678745  | 0.759 | 0.562 |
| KLHL3      | 6.68E-20 | 0.320145676 | 0.354 | 0.164 |
| LDLRAD4    | 7.52E-20 | 0.309649284 | 0.864 | 0.621 |
| AL133268.4 | 8.56E-20 | 0.39955196  | 0.291 | 0.122 |
| MID1       | 9.23E-20 | 0.47222658  | 0.518 | 0.322 |
| EBF1       | 9.92E-20 | 0.494762795 | 0.865 | 0.69  |
| PTGDS      | 1.01E-19 | 0.840161611 | 0.313 | 0.139 |
| ABCA5      | 1.20E-19 | 0.343815893 | 0.354 | 0.174 |
| KLF4       | 1.21E-19 | 0.533414398 | 0.734 | 0.54  |
| PITPNC1    | 1.48E-19 | 0.492423594 | 0.96  | 0.787 |
| ANKRD12    | 1.49E-19 | 0.332859196 | 0.908 | 0.77  |
| CYTL1      | 2.23E-19 | 0.500888603 | 0.335 | 0.16  |
| ANKRD29    | 2.62E-19 | 0.345747878 | 0.439 | 0.236 |
| ZBTB16     | 3.03E-19 | 0.340973878 | 0.869 | 0.625 |
| SAV1       | 4.33E-19 | 0.393860995 | 0.64  | 0.456 |
| SEMA6D     | 4.58E-19 | 0.45297558  | 0.341 | 0.161 |
| TYMP       | 5.49E-19 | 0.271907952 | 0.55  | 0.339 |
| AC007681.1 | 6.71E-19 | 0.381787158 | 0.324 | 0.147 |
| AC016831.5 | 7.91E-19 | 0.351682286 | 0.364 | 0.188 |
| 3-Mar      | 1.13E-18 | 0.495860128 | 0.764 | 0.552 |
| RALGDS     | 1.13E-18 | 0.366380179 | 0.562 | 0.369 |
| ITGB4      | 1.43E-18 | 0.317460966 | 0.671 | 0.465 |
| EGLN3      | 1.82E-18 | 0.253097504 | 0.291 | 0.125 |

|            |          |             |       |       |
|------------|----------|-------------|-------|-------|
| ROBO1      | 1.92E-18 | 0.826683526 | 0.523 | 0.334 |
| CXCL2      | 2.31E-18 | 0.513640192 | 0.422 | 0.228 |
| HINT3      | 2.56E-18 | 0.252886462 | 0.296 | 0.132 |
| CCL2       | 2.94E-18 | 0.508283212 | 0.371 | 0.189 |
| PMP22      | 3.00E-18 | 0.3245949   | 0.75  | 0.554 |
| NOSTRIN    | 3.38E-18 | 0.395322966 | 0.841 | 0.602 |
| NR3C2      | 3.54E-18 | 0.424250727 | 0.476 | 0.267 |
| NDRG1      | 4.04E-18 | 0.381214955 | 0.906 | 0.754 |
| AHNAK      | 4.54E-18 | 0.281171273 | 0.923 | 0.772 |
| SERTAD2    | 4.69E-18 | 0.482945547 | 0.491 | 0.315 |
| FGD4       | 4.86E-18 | 0.455766971 | 0.722 | 0.513 |
| MMP28      | 5.42E-18 | 0.322440912 | 0.384 | 0.201 |
| NSUN6      | 5.72E-18 | 0.520793613 | 0.486 | 0.302 |
| CNTNAP3    | 6.66E-18 | 0.342011535 | 0.297 | 0.135 |
| AHR        | 7.46E-18 | 0.323684061 | 0.814 | 0.649 |
| HNRNPC     | 1.12E-17 | 0.328067054 | 0.931 | 0.806 |
| CHN1       | 1.14E-17 | 0.46203622  | 0.589 | 0.392 |
| ZNF267     | 1.24E-17 | 0.385934372 | 0.513 | 0.339 |
| MAP3K13    | 1.27E-17 | 0.277817201 | 0.591 | 0.407 |
| AL049629.1 | 1.31E-17 | 0.396680423 | 0.333 | 0.164 |
| KIAA0040   | 1.33E-17 | 0.307274602 | 0.373 | 0.198 |
| FKBP11     | 1.42E-17 | 0.265669678 | 0.422 | 0.242 |
| PLOD2      | 1.73E-17 | 0.582885631 | 0.536 | 0.364 |
| SSBP2      | 1.93E-17 | 0.298138271 | 0.623 | 0.398 |
| MAN1A1     | 2.99E-17 | 0.294576642 | 0.706 | 0.512 |
| EPB41L4A   | 3.29E-17 | 0.37832914  | 0.89  | 0.682 |
| CBLB       | 4.25E-17 | 0.343013377 | 0.876 | 0.682 |
| LAMA3      | 5.55E-17 | 0.328543869 | 0.388 | 0.203 |
| DLG2       | 6.01E-17 | 0.589387688 | 0.453 | 0.268 |
| NFKB2      | 6.30E-17 | 0.267647436 | 0.364 | 0.196 |
| AC105450.1 | 7.63E-17 | 0.451951465 | 0.306 | 0.145 |
| MAOA       | 8.33E-17 | 0.288005898 | 0.392 | 0.199 |
| PREX2      | 8.38E-17 | 0.259230988 | 0.963 | 0.776 |
| AQP1       | 9.41E-17 | 0.324261936 | 0.902 | 0.729 |
| NFAT5      | 1.63E-16 | 0.302247721 | 0.89  | 0.716 |
| LYRM1      | 1.89E-16 | 0.303596222 | 0.504 | 0.317 |
| NFE2L1     | 1.90E-16 | 0.277242438 | 0.665 | 0.485 |
| PRKAG2     | 1.90E-16 | 0.435905263 | 0.507 | 0.33  |
| LINC00513  | 1.94E-16 | 0.291259282 | 0.497 | 0.312 |
| LDHA       | 2.05E-16 | 0.259902812 | 0.87  | 0.747 |
| SLC9B2     | 2.79E-16 | 0.319674057 | 0.356 | 0.19  |
| ARRDC3     | 2.86E-16 | 0.293876108 | 0.61  | 0.424 |
| SAMHD1     | 3.93E-16 | 0.276565786 | 0.578 | 0.391 |

|             |          |             |       |       |
|-------------|----------|-------------|-------|-------|
| REV3L       | 3.96E-16 | 0.341017348 | 0.794 | 0.627 |
| OVCH1       | 4.71E-16 | 0.348892061 | 0.252 | 0.107 |
| SAMD12      | 6.92E-16 | 0.386965575 | 0.472 | 0.279 |
| PITPNB      | 7.51E-16 | 0.336548842 | 0.778 | 0.61  |
| INPP1       | 8.71E-16 | 0.279842896 | 0.599 | 0.423 |
| NASP        | 8.77E-16 | 0.262301702 | 0.842 | 0.686 |
| TRIB1       | 8.85E-16 | 0.353220704 | 0.499 | 0.318 |
| BRAF        | 9.34E-16 | 0.298421199 | 0.827 | 0.651 |
| UBE2E2      | 1.22E-15 | 0.314194516 | 0.792 | 0.601 |
| ATF6        | 1.27E-15 | 0.382098895 | 0.78  | 0.628 |
| NAV3        | 1.35E-15 | 0.674987542 | 0.421 | 0.252 |
| BCR         | 1.56E-15 | 0.295038984 | 0.752 | 0.589 |
| SIK3        | 1.76E-15 | 0.326227339 | 0.895 | 0.724 |
| PDLIM3      | 1.83E-15 | 0.325629899 | 0.521 | 0.338 |
| ETV6        | 1.96E-15 | 0.37538408  | 0.869 | 0.711 |
| RAB11A      | 1.99E-15 | 0.26386197  | 0.905 | 0.766 |
| THUMPD3-AS1 | 2.20E-15 | 0.340049501 | 0.518 | 0.336 |
| GNAQ        | 2.71E-15 | 0.370175509 | 0.924 | 0.767 |
| WWP1        | 2.76E-15 | 0.269848321 | 0.685 | 0.532 |
| SRSF5       | 2.89E-15 | 0.253768477 | 0.897 | 0.757 |
| CPNE8       | 3.36E-15 | 0.299547443 | 0.871 | 0.693 |
| EEF1B2      | 3.67E-15 | 0.279591706 | 0.905 | 0.826 |
| LINC01473   | 4.67E-15 | 0.435127783 | 0.476 | 0.308 |
| RAI14       | 7.15E-15 | 0.505164584 | 0.858 | 0.772 |
| SPAG9       | 7.50E-15 | 0.364684138 | 0.884 | 0.739 |
| DDX58       | 8.20E-15 | 0.434399423 | 0.594 | 0.413 |
| AL109930.1  | 8.91E-15 | 0.382296537 | 0.518 | 0.347 |
| CYSTM1      | 1.17E-14 | 0.257516804 | 0.64  | 0.472 |
| REL         | 1.53E-14 | 0.267213574 | 0.638 | 0.457 |
| TACC1       | 1.76E-14 | 0.272000028 | 0.965 | 0.84  |
| SPDYA       | 2.03E-14 | 0.422342111 | 0.368 | 0.215 |
| IL3RA       | 2.07E-14 | 0.261777173 | 0.812 | 0.642 |
| ACER2       | 2.25E-14 | 0.563653409 | 0.317 | 0.171 |
| SEMA4A      | 2.42E-14 | 0.424269024 | 0.475 | 0.298 |
| KDM6B       | 3.01E-14 | 0.299395924 | 0.51  | 0.347 |
| USP53       | 3.10E-14 | 0.313213407 | 0.486 | 0.315 |
| PDLIM5      | 3.66E-14 | 0.292815596 | 0.935 | 0.794 |
| LRP5        | 3.76E-14 | 0.264550358 | 0.424 | 0.25  |
| SHROOM2     | 4.41E-14 | 0.31019829  | 0.399 | 0.239 |
| NKTR        | 6.06E-14 | 0.337306889 | 0.859 | 0.706 |
| CSF1        | 6.60E-14 | 0.28706623  | 0.279 | 0.137 |
| CASZ1       | 7.83E-14 | 0.265637749 | 0.268 | 0.129 |
| FRMD4A      | 8.34E-14 | 0.374237767 | 0.698 | 0.534 |



|             |          |             |       |       |
|-------------|----------|-------------|-------|-------|
| STEAP1B     | 8.69E-14 | 0.366905665 | 0.486 | 0.318 |
| ZNF521      | 9.26E-14 | 0.350137738 | 0.825 | 0.658 |
| SLCO2A1     | 1.02E-13 | 0.467951715 | 0.853 | 0.658 |
| AHI1        | 1.07E-13 | 0.325272358 | 0.659 | 0.484 |
| DIPK2B      | 1.08E-13 | 0.289825579 | 0.87  | 0.712 |
| SNTB2       | 1.52E-13 | 0.29066164  | 0.774 | 0.621 |
| MIR222HG    | 1.55E-13 | 0.277824073 | 0.446 | 0.279 |
| FBN1        | 1.75E-13 | 0.442505337 | 0.688 | 0.528 |
| AL365295.1  | 1.77E-13 | 0.484263592 | 0.482 | 0.319 |
| RAPH1       | 1.96E-13 | 0.307334354 | 0.608 | 0.448 |
| CD55        | 2.10E-13 | 0.276274118 | 0.787 | 0.652 |
| GNA14-AS1   | 2.23E-13 | 0.378491249 | 0.272 | 0.14  |
| KLHL2       | 2.35E-13 | 0.323995537 | 0.558 | 0.396 |
| ZNF423      | 2.39E-13 | 0.310918467 | 0.526 | 0.361 |
| ADAMTS9-AS2 | 2.47E-13 | 0.406231745 | 0.632 | 0.458 |
| MFHAS1      | 2.59E-13 | 0.389291436 | 0.379 | 0.235 |
| CORO1C      | 2.95E-13 | 0.278242849 | 0.638 | 0.486 |
| MIR22HG     | 3.07E-13 | 0.290565204 | 0.382 | 0.23  |
| ACACB       | 3.39E-13 | 0.34639155  | 0.55  | 0.376 |
| PTPN1       | 4.29E-13 | 0.253187948 | 0.645 | 0.466 |
| STOX2       | 4.66E-13 | 0.284705515 | 0.606 | 0.429 |
| ACKR3       | 5.31E-13 | 0.320465063 | 0.432 | 0.266 |
| RASA4       | 5.56E-13 | 0.256933782 | 0.295 | 0.153 |
| ARHGEF3     | 7.26E-13 | 0.319893703 | 0.8   | 0.635 |
| FTX         | 7.46E-13 | 0.390436178 | 0.919 | 0.756 |
| DISC1FP1    | 7.60E-13 | 0.562598235 | 0.273 | 0.137 |
| TBC1D4      | 8.73E-13 | 0.364445863 | 0.61  | 0.445 |
| RFX3        | 1.29E-12 | 0.337339596 | 0.837 | 0.686 |
| LRMDA       | 1.40E-12 | 0.308770493 | 0.956 | 0.796 |
| TRMT11      | 1.47E-12 | 0.308066607 | 0.375 | 0.228 |
| NFIA        | 1.48E-12 | 0.318919363 | 0.922 | 0.759 |
| SLC25A29    | 1.50E-12 | 0.263866267 | 0.389 | 0.242 |
| IMMP2L      | 1.70E-12 | 0.344136692 | 0.704 | 0.542 |
| HIF1A       | 1.83E-12 | 0.38755059  | 0.836 | 0.716 |
| RNF115      | 2.28E-12 | 0.284281186 | 0.78  | 0.611 |
| GALNT15     | 3.03E-12 | 0.372657991 | 0.307 | 0.169 |
| GLIS3       | 3.35E-12 | 0.293700111 | 0.573 | 0.406 |
| ZHX2        | 4.50E-12 | 0.274322787 | 0.585 | 0.434 |
| AFAP1L2     | 5.55E-12 | 0.251721923 | 0.274 | 0.141 |
| ERG         | 5.70E-12 | 0.282949673 | 0.956 | 0.83  |
| RAB8B       | 6.76E-12 | 0.260704276 | 0.556 | 0.397 |
| SVIL        | 6.94E-12 | 0.373174415 | 0.798 | 0.651 |
| IRAK2       | 7.03E-12 | 0.336199377 | 0.428 | 0.281 |

|            |          |             |       |       |
|------------|----------|-------------|-------|-------|
| ASAP1      | 8.17E-12 | 0.281817847 | 0.985 | 0.833 |
| HRH1       | 9.68E-12 | 0.281376818 | 0.568 | 0.413 |
| NUP210L    | 1.25E-11 | 0.517056572 | 0.313 | 0.187 |
| ARID5B     | 1.48E-11 | 0.272821875 | 0.838 | 0.733 |
| RNF217     | 2.43E-11 | 0.340050741 | 0.442 | 0.299 |
| FBXL2      | 3.05E-11 | 0.285669915 | 0.389 | 0.248 |
| TAF4B      | 4.46E-11 | 0.368017828 | 0.368 | 0.224 |
| CHIC2      | 4.71E-11 | 0.359108546 | 0.694 | 0.566 |
| CDKN1A     | 4.75E-11 | 0.292262105 | 0.665 | 0.512 |
| GALNT10    | 6.01E-11 | 0.314855603 | 0.501 | 0.357 |
| PDE7B      | 6.37E-11 | 0.464882326 | 0.643 | 0.48  |
| FOXO3      | 8.91E-11 | 0.382628711 | 0.705 | 0.551 |
| ERI2       | 9.33E-11 | 0.286018018 | 0.278 | 0.152 |
| AC008014.1 | 1.01E-10 | 0.291601304 | 0.337 | 0.203 |
| ATG7       | 1.56E-10 | 0.262725931 | 0.681 | 0.531 |
| SUSD6      | 2.64E-10 | 0.292410674 | 0.718 | 0.583 |
| PRKN       | 2.70E-10 | 0.355894033 | 0.536 | 0.396 |
| PPP3R1     | 3.87E-10 | 0.324963546 | 0.72  | 0.588 |
| MBNL2      | 4.03E-10 | 0.279332942 | 0.856 | 0.723 |
| LRRC49     | 4.08E-10 | 0.319301554 | 0.299 | 0.179 |
| WBP1L      | 4.63E-10 | 0.251083264 | 0.469 | 0.34  |
| CUL1       | 5.05E-10 | 0.255037701 | 0.623 | 0.49  |
| MYO9A      | 5.21E-10 | 0.354483631 | 0.701 | 0.566 |
| HLA-E      | 5.41E-10 | 0.25957197  | 0.987 | 0.926 |
| SNAPC1     | 5.43E-10 | 0.358868864 | 0.437 | 0.31  |
| YPEL2      | 5.84E-10 | 0.319778566 | 0.636 | 0.508 |
| EGLN1      | 5.88E-10 | 0.358180075 | 0.651 | 0.53  |
| TRIM69     | 7.60E-10 | 0.365068811 | 0.435 | 0.303 |
| INPP4B     | 7.72E-10 | 0.428045729 | 0.329 | 0.205 |
| ZC3HAV1    | 8.30E-10 | 0.290764562 | 0.718 | 0.574 |
| FAM171A1   | 8.86E-10 | 0.262261388 | 0.684 | 0.533 |
| SSBP3      | 1.10E-09 | 0.261561219 | 0.564 | 0.425 |
| LDLRAD3    | 1.29E-09 | 0.344311409 | 0.551 | 0.41  |
| PPP2R3A    | 1.52E-09 | 0.260610297 | 0.39  | 0.259 |
| ATP2B1     | 1.66E-09 | 0.26852272  | 0.747 | 0.617 |
| FBXO31     | 1.71E-09 | 0.28069829  | 0.585 | 0.452 |
| JAK2       | 1.92E-09 | 0.275946434 | 0.42  | 0.287 |
| MB21D2     | 1.98E-09 | 0.318190584 | 0.33  | 0.212 |
| BTBD7      | 2.48E-09 | 0.314166263 | 0.671 | 0.536 |
| SPIDR      | 2.53E-09 | 0.255283196 | 0.777 | 0.637 |
| RCAN1      | 3.23E-09 | 0.270858308 | 0.684 | 0.563 |
| PTPRM      | 3.24E-09 | 0.257266049 | 0.985 | 0.856 |
| NAALADL2   | 3.48E-09 | 0.358867989 | 0.285 | 0.169 |

|            |             |             |       |       |
|------------|-------------|-------------|-------|-------|
| FBXO11     | 4.65E-09    | 0.3174363   | 0.809 | 0.666 |
| PCED1B     | 7.37E-09    | 0.303497663 | 0.337 | 0.22  |
| SH3RF1     | 8.00E-09    | 0.426705587 | 0.389 | 0.27  |
| LINC01515  | 8.61E-09    | 0.35724577  | 0.267 | 0.158 |
| SQSTM1     | 8.69E-09    | 0.317239513 | 0.84  | 0.725 |
| DUSP1      | 1.32E-08    | 0.283400401 | 0.917 | 0.838 |
| TXNIP      | 1.53E-08    | 0.311269757 | 0.858 | 0.759 |
| NXN        | 1.63E-08    | 0.266808068 | 0.838 | 0.727 |
| MTHFD1L    | 2.15E-08    | 0.299007388 | 0.578 | 0.446 |
| ALPK1      | 2.20E-08    | 0.294678046 | 0.355 | 0.249 |
| KANSL1L    | 2.33E-08    | 0.271015389 | 0.375 | 0.261 |
| LINC01117  | 2.99E-08    | 0.296683598 | 0.361 | 0.243 |
| NFE2L3     | 3.52E-08    | 0.342144056 | 0.471 | 0.347 |
| SLC30A7    | 4.63E-08    | 0.25570326  | 0.562 | 0.45  |
| WNT2B      | 5.63E-08    | 0.251628415 | 0.498 | 0.366 |
| TTY14      | 6.12E-08    | 0.320645239 | 0.408 | 0.292 |
| MRNIP      | 6.72E-08    | 0.274495808 | 0.295 | 0.19  |
| GMDS-DT    | 6.77E-08    | 0.269379299 | 0.561 | 0.438 |
| FER        | 8.12E-08    | 0.253553636 | 0.684 | 0.566 |
| LARP4B     | 8.78E-08    | 0.253326395 | 0.655 | 0.545 |
| MAPK8      | 1.11E-07    | 0.288254563 | 0.59  | 0.485 |
| SNED1      | 2.16E-07    | 0.28552352  | 0.589 | 0.462 |
| BIN3       | 2.68E-07    | 0.301557878 | 0.528 | 0.398 |
| CCNH       | 2.82E-07    | 0.31954999  | 0.661 | 0.54  |
| MOB3B      | 3.50E-07    | 0.299856777 | 0.315 | 0.21  |
| NTN4       | 3.68E-07    | 0.276378571 | 0.317 | 0.214 |
| LINC01876  | 1.07E-06    | 0.286843669 | 0.264 | 0.172 |
| RFX3-AS1   | 1.17E-06    | 0.253324998 | 0.345 | 0.251 |
| RAPGEF5    | 1.85E-06    | 0.528323512 | 0.818 | 0.707 |
| AHCYL2     | 5.39E-06    | 0.257213746 | 0.389 | 0.295 |
| MEF2C-AS1  | 1.56E-05    | 0.285464396 | 0.285 | 0.201 |
| PHLDB2     | 3.14E-05    | 0.387287127 | 0.512 | 0.433 |
| INTS6      | 3.14E-05    | 0.28469927  | 0.678 | 0.582 |
| C11orf96   | 0.00013295  | 0.294266411 | 0.315 | 0.238 |
| AC018816.1 | 0.000144921 | 0.257506761 | 0.324 | 0.255 |
| ADAMTS4    | 0.001349011 | 0.267154783 | 0.321 | 0.261 |
| FMNL2      | 0.002191449 | 0.260938613 | 0.66  | 0.597 |
| PTPRG      | 5.71E-115   | 1.869126659 | 0.965 | 0.63  |
| ARL15      | 1.54E-114   | 2.06679606  | 0.971 | 0.706 |
| CXCL12     | 1.28E-75    | 1.652934952 | 0.533 | 0.142 |
| INSR       | 1.70E-74    | 1.564575583 | 0.888 | 0.627 |
| ADAMTS6    | 4.49E-74    | 1.501082425 | 0.729 | 0.336 |
| FLT1       | 4.29E-72    | 1.398233478 | 0.97  | 0.749 |

|             |          |             |       |       |
|-------------|----------|-------------|-------|-------|
| ADAMTSL2    | 1.07E-70 | 0.817541733 | 0.366 | 0.048 |
| JAG2        | 4.50E-70 | 0.817096686 | 0.608 | 0.219 |
| MEF2A       | 5.75E-70 | 0.895483865 | 0.953 | 0.725 |
| RASGRF2     | 1.05E-69 | 1.007301796 | 0.909 | 0.557 |
| BTNL9       | 2.49E-69 | 1.24965848  | 0.34  | 0.036 |
| MPPED2      | 1.26E-68 | 0.768925352 | 0.329 | 0.031 |
| MIR181A1HG  | 2.45E-68 | 0.877774189 | 0.557 | 0.163 |
| SYNPO       | 1.24E-65 | 0.712612792 | 0.778 | 0.401 |
| MLEC        | 2.48E-65 | 0.858398984 | 0.716 | 0.352 |
| A2M         | 4.88E-63 | 0.838621589 | 0.984 | 0.889 |
| NES         | 2.19E-62 | 0.770550669 | 0.602 | 0.214 |
| RAPGEF1     | 7.16E-62 | 1.08576722  | 0.883 | 0.623 |
| COL4A2      | 1.02E-61 | 1.122255518 | 0.913 | 0.736 |
| IGFBP3      | 8.65E-60 | 1.655209151 | 0.456 | 0.116 |
| HEY1        | 1.01E-58 | 0.675879764 | 0.327 | 0.045 |
| MMP2        | 2.05E-58 | 0.788740842 | 0.592 | 0.229 |
| DOCK6       | 3.58E-56 | 0.667416403 | 0.74  | 0.382 |
| CTNNB1      | 5.78E-56 | 0.74375482  | 0.944 | 0.729 |
| SPARC       | 9.20E-56 | 1.029524682 | 0.925 | 0.793 |
| CACNA1C     | 1.04E-55 | 1.440000288 | 0.658 | 0.326 |
| RAPGEF2     | 6.88E-55 | 0.837001941 | 0.904 | 0.644 |
| ACE         | 4.01E-53 | 0.752495049 | 0.462 | 0.142 |
| DYSF        | 1.01E-52 | 0.884537183 | 0.679 | 0.343 |
| SGK1        | 2.73E-52 | 0.968911115 | 0.729 | 0.402 |
| GRB10       | 1.37E-51 | 1.124668236 | 0.928 | 0.74  |
| CDH13       | 3.45E-51 | 1.119689106 | 0.788 | 0.448 |
| CPNE5       | 1.43E-50 | 0.657556583 | 0.482 | 0.158 |
| PLPP1       | 2.10E-50 | 1.310121242 | 0.905 | 0.677 |
| ITGA8       | 2.21E-50 | 0.822796895 | 0.401 | 0.106 |
| EDIL3       | 1.14E-49 | 0.825010273 | 0.451 | 0.136 |
| NCALD       | 1.94E-49 | 0.861121282 | 0.396 | 0.101 |
| FMNL3       | 5.13E-49 | 0.610062527 | 0.594 | 0.262 |
| MIR4435-2HG | 2.96E-48 | 1.128379774 | 0.637 | 0.328 |
| AKAP13      | 1.82E-47 | 0.647971759 | 0.99  | 0.849 |
| ESAM        | 1.93E-47 | 0.632536261 | 0.841 | 0.594 |
| CLIC5       | 1.09E-46 | 0.544883566 | 0.286 | 0.046 |
| MYO1B       | 1.14E-46 | 0.939013287 | 0.629 | 0.309 |
| PDGFD       | 1.67E-46 | 0.778001273 | 0.4   | 0.109 |
| GJA4        | 2.49E-46 | 0.751448027 | 0.252 | 0.03  |
| PLXNA2      | 3.27E-46 | 0.868016108 | 0.828 | 0.561 |
| EXOC3L1     | 4.93E-46 | 0.389621613 | 0.321 | 0.064 |
| PLXND1      | 1.17E-45 | 0.599167621 | 0.806 | 0.538 |
| PCDH12      | 3.19E-45 | 0.519401386 | 0.387 | 0.108 |

|            |          |             |       |       |
|------------|----------|-------------|-------|-------|
| KCNQ1      | 6.87E-45 | 0.735301854 | 0.334 | 0.078 |
| PTP4A3     | 1.27E-44 | 0.442157971 | 0.374 | 0.098 |
| ARHGAP29   | 1.46E-44 | 0.608763912 | 0.95  | 0.8   |
| NAV1       | 2.02E-44 | 0.546163918 | 0.701 | 0.373 |
| GSN        | 2.49E-44 | 0.83675762  | 0.966 | 0.794 |
| HEG1       | 2.73E-44 | 0.74077558  | 0.915 | 0.662 |
| MAP1B      | 6.71E-44 | 0.806870972 | 0.653 | 0.34  |
| LAMB1      | 6.77E-44 | 0.760119218 | 0.793 | 0.529 |
| COL13A1    | 7.03E-44 | 0.661435678 | 0.297 | 0.06  |
| RASGRP3    | 8.47E-44 | 0.781871601 | 0.652 | 0.343 |
| ADARB1     | 1.11E-43 | 0.622279659 | 0.674 | 0.356 |
| DLL4       | 2.80E-43 | 0.696007356 | 0.518 | 0.208 |
| FAP        | 2.96E-43 | 0.554852976 | 0.557 | 0.232 |
| APP        | 5.06E-43 | 0.587934846 | 0.986 | 0.9   |
| ITGA1      | 9.10E-43 | 0.923617694 | 0.7   | 0.403 |
| EML1       | 9.13E-43 | 0.583500749 | 0.509 | 0.202 |
| EFNB1      | 2.58E-42 | 0.500031182 | 0.429 | 0.146 |
| CAVIN3     | 5.54E-42 | 0.655043592 | 0.722 | 0.445 |
| CDH5       | 7.25E-42 | 0.560996263 | 0.909 | 0.701 |
| SOX5       | 1.29E-41 | 0.92148444  | 0.36  | 0.096 |
| TCF12      | 1.32E-41 | 0.685468122 | 0.952 | 0.779 |
| ETS1       | 2.08E-41 | 0.668395886 | 0.931 | 0.756 |
| CDYL2      | 2.48E-41 | 0.533594292 | 0.501 | 0.203 |
| VWA1       | 4.97E-41 | 0.928286355 | 0.785 | 0.553 |
| KCNN3      | 5.11E-41 | 0.580266008 | 0.502 | 0.204 |
| DHRS3      | 9.43E-41 | 0.620450706 | 0.523 | 0.219 |
| AC119674.1 | 1.01E-40 | 0.807240224 | 0.544 | 0.242 |
| PCDH17     | 3.34E-40 | 0.807579148 | 0.793 | 0.526 |
| PTK2       | 4.64E-40 | 0.569421863 | 0.973 | 0.802 |
| PLCL2      | 2.14E-39 | 0.509777771 | 0.437 | 0.154 |
| TMEM204    | 3.02E-39 | 0.660527966 | 0.66  | 0.362 |
| ASAP2      | 3.41E-39 | 0.632443091 | 0.674 | 0.387 |
| CCDC3      | 4.61E-39 | 0.842339437 | 0.637 | 0.341 |
| MAML3      | 4.77E-39 | 0.741119721 | 0.709 | 0.404 |
| RGS3       | 5.28E-39 | 0.641561995 | 0.682 | 0.379 |
| EXOC3L2    | 1.44E-38 | 0.572898753 | 0.396 | 0.137 |
| BGN        | 3.62E-38 | 0.592940071 | 0.411 | 0.138 |
| RFLNB      | 3.63E-38 | 0.571717513 | 0.522 | 0.229 |
| CD276      | 4.34E-38 | 0.36868116  | 0.327 | 0.088 |
| UNC5B      | 5.12E-38 | 0.51021359  | 0.271 | 0.054 |
| SEMA3F     | 8.94E-38 | 0.508730641 | 0.589 | 0.293 |
| JUP        | 9.02E-38 | 0.490912205 | 0.478 | 0.198 |
| SEC14L1    | 1.58E-37 | 0.59506991  | 0.929 | 0.758 |

|            |          |             |       |       |
|------------|----------|-------------|-------|-------|
| PLVAP      | 1.70E-37 | 0.955213131 | 0.88  | 0.775 |
| PLCL1      | 2.52E-37 | 0.74607396  | 0.427 | 0.153 |
| KLHL5      | 2.95E-37 | 0.602072329 | 0.817 | 0.553 |
| MYO1D      | 3.05E-37 | 0.574879278 | 0.772 | 0.474 |
| SPRY4      | 3.91E-37 | 0.567541431 | 0.441 | 0.173 |
| VASH1      | 5.04E-37 | 0.533681138 | 0.512 | 0.232 |
| RIN3       | 9.15E-37 | 0.506534958 | 0.586 | 0.284 |
| JCAD       | 1.01E-36 | 0.485839271 | 0.668 | 0.382 |
| MCF2L      | 2.16E-36 | 0.678963162 | 0.769 | 0.506 |
| TIE1       | 2.28E-36 | 0.520588759 | 0.843 | 0.595 |
| APCDD1     | 2.42E-36 | 0.482323799 | 0.332 | 0.098 |
| SLC6A6     | 2.45E-36 | 0.739463753 | 0.465 | 0.193 |
| NRCAM      | 1.33E-35 | 0.88909126  | 0.326 | 0.095 |
| DENND11    | 1.51E-35 | 0.557464436 | 0.51  | 0.234 |
| ALPK3      | 2.32E-35 | 0.496977465 | 0.44  | 0.168 |
| ALPL       | 6.16E-35 | 0.735249109 | 0.343 | 0.108 |
| ITGB1      | 8.38E-35 | 0.448514865 | 0.95  | 0.851 |
| TBC1D1     | 1.07E-34 | 0.569094396 | 0.825 | 0.553 |
| ZFH3       | 1.10E-34 | 0.654589582 | 0.629 | 0.367 |
| PTPN14     | 3.93E-34 | 0.733566667 | 0.828 | 0.606 |
| ITIH5      | 3.94E-34 | 0.955416685 | 0.453 | 0.201 |
| TNK2       | 3.99E-34 | 0.372493044 | 0.332 | 0.101 |
| PDGFB      | 6.45E-34 | 0.612708155 | 0.642 | 0.352 |
| SFMBT2     | 6.81E-34 | 0.709272951 | 0.766 | 0.513 |
| RIN2       | 1.06E-33 | 0.550109107 | 0.856 | 0.594 |
| UACA       | 2.56E-33 | 0.557654914 | 0.883 | 0.712 |
| HERC1      | 2.64E-33 | 0.625791198 | 0.883 | 0.665 |
| AC002070.1 | 2.64E-33 | 0.569888166 | 0.361 | 0.122 |
| SERPINH1   | 5.67E-33 | 0.537893574 | 0.734 | 0.496 |
| AC008050.1 | 7.57E-33 | 0.723407742 | 0.364 | 0.125 |
| GPR4       | 8.39E-33 | 0.33658185  | 0.352 | 0.119 |
| TSC22D1    | 8.46E-33 | 0.745721143 | 0.889 | 0.715 |
| PLOD1      | 1.31E-32 | 0.358164357 | 0.43  | 0.175 |
| FCHSD2     | 3.10E-32 | 0.624253915 | 0.839 | 0.619 |
| AFAP1L1    | 3.99E-32 | 0.551435115 | 0.708 | 0.448 |
| FGF12      | 6.36E-32 | 0.444763197 | 0.279 | 0.074 |
| SOX18      | 9.87E-32 | 0.384099585 | 0.774 | 0.487 |
| ARHGAP4    | 1.65E-31 | 0.417354382 | 0.363 | 0.131 |
| MYO6       | 2.75E-31 | 0.581350656 | 0.758 | 0.52  |
| ICAM2      | 3.59E-31 | 0.616993082 | 0.759 | 0.541 |
| ANGPTL2    | 4.83E-31 | 0.347117402 | 0.388 | 0.148 |
| LPCAT2     | 5.04E-31 | 0.504459465 | 0.589 | 0.326 |
| ENG        | 7.13E-31 | 0.623768186 | 0.942 | 0.813 |

|            |          |             |       |       |
|------------|----------|-------------|-------|-------|
| AIF1L      | 8.40E-31 | 0.405752249 | 0.283 | 0.079 |
| RDX        | 1.51E-30 | 0.511436705 | 0.923 | 0.779 |
| ZNF366     | 1.56E-30 | 0.415157879 | 0.517 | 0.245 |
| ITPRIP     | 3.90E-30 | 0.500681842 | 0.721 | 0.457 |
| FBLIM1     | 4.60E-30 | 0.392713377 | 0.27  | 0.072 |
| ITGA9      | 5.66E-30 | 0.543132273 | 0.759 | 0.484 |
| PINK1      | 8.90E-30 | 0.385614656 | 0.554 | 0.289 |
| TMEM184B   | 1.17E-29 | 0.449496402 | 0.647 | 0.401 |
| ST6GALNAC3 | 1.52E-29 | 0.569297786 | 0.957 | 0.775 |
| PCSK5      | 1.67E-29 | 0.898614417 | 0.44  | 0.197 |
| TTC28      | 1.75E-29 | 0.528729002 | 0.933 | 0.753 |
| TMEM233    | 2.38E-29 | 0.361416768 | 0.252 | 0.063 |
| ACTN4      | 3.38E-29 | 0.405845723 | 0.921 | 0.735 |
| SMAD6      | 3.67E-29 | 0.502904755 | 0.324 | 0.108 |
| CCND1      | 5.12E-29 | 0.521793331 | 0.429 | 0.183 |
| PMEPA1     | 5.17E-29 | 0.710578343 | 0.525 | 0.289 |
| PHACTR1    | 5.66E-29 | 0.552476647 | 0.674 | 0.393 |
| FYN        | 6.03E-29 | 0.550234309 | 0.909 | 0.691 |
| PTPRK      | 6.33E-29 | 0.588496512 | 0.907 | 0.732 |
| DGKD       | 1.20E-28 | 0.593067196 | 0.43  | 0.204 |
| ACOT7      | 1.56E-28 | 0.31778634  | 0.425 | 0.185 |
| SLC12A2    | 1.81E-28 | 0.520791061 | 0.684 | 0.421 |
| CRIP2      | 1.99E-28 | 0.418020697 | 0.925 | 0.789 |
| LAMA4      | 2.72E-28 | 0.727782088 | 0.679 | 0.448 |
| ARHGEF12   | 3.05E-28 | 0.454907832 | 0.88  | 0.687 |
| C1orf54    | 3.09E-28 | 0.469857067 | 0.719 | 0.465 |
| CD46       | 3.12E-28 | 0.409988423 | 0.798 | 0.595 |
| KIAA0355   | 4.51E-28 | 0.481624354 | 0.88  | 0.69  |
| COLGALT1   | 6.82E-28 | 0.385655588 | 0.448 | 0.212 |
| TMC7       | 8.32E-28 | 0.314648333 | 0.286 | 0.088 |
| IQSEC1     | 1.11E-27 | 0.555295483 | 0.653 | 0.403 |
| EFNB2      | 1.51E-27 | 0.821380735 | 0.743 | 0.552 |
| HTRA1      | 1.75E-27 | 0.569901092 | 0.735 | 0.525 |
| DGKH       | 1.83E-27 | 0.466269091 | 0.806 | 0.578 |
| PDE10A     | 1.86E-27 | 0.538364042 | 0.862 | 0.586 |
| YWHAH      | 1.98E-27 | 0.341426955 | 0.777 | 0.533 |
| STT3B      | 2.32E-27 | 0.480850761 | 0.693 | 0.44  |
| PHLDB1     | 3.23E-27 | 0.373667398 | 0.459 | 0.212 |
| WDFY3      | 4.11E-27 | 0.467045548 | 0.754 | 0.513 |
| APBB2      | 4.92E-27 | 0.520201954 | 0.913 | 0.72  |
| ITSN2      | 5.92E-27 | 0.467452422 | 0.795 | 0.559 |
| HDAC7      | 7.31E-27 | 0.438623377 | 0.732 | 0.493 |
| CD34       | 8.36E-27 | 0.467617669 | 0.88  | 0.68  |

|            |          |             |       |       |
|------------|----------|-------------|-------|-------|
| RAB31      | 9.76E-27 | 0.379652865 | 0.437 | 0.195 |
| STK10      | 9.84E-27 | 0.430673177 | 0.547 | 0.304 |
| AFDN       | 1.06E-26 | 0.45303866  | 0.888 | 0.687 |
| F2RL3      | 1.08E-26 | 0.42393911  | 0.47  | 0.218 |
| PLAU       | 1.22E-26 | 0.295682496 | 0.252 | 0.07  |
| CD81       | 1.64E-26 | 0.443731917 | 0.944 | 0.851 |
| TCIM       | 1.67E-26 | 0.406119435 | 0.674 | 0.388 |
| OSBPL3     | 1.68E-26 | 0.526458359 | 0.475 | 0.231 |
| DOCK9      | 2.39E-26 | 0.43178782  | 0.986 | 0.86  |
| CASKIN2    | 2.42E-26 | 0.337636484 | 0.451 | 0.212 |
| COL15A1    | 2.98E-26 | 0.682372751 | 0.819 | 0.692 |
| ZEB1       | 3.00E-26 | 0.51146595  | 0.966 | 0.837 |
| JAM3       | 3.14E-26 | 0.435086708 | 0.624 | 0.357 |
| LRRC8A     | 4.25E-26 | 0.336291423 | 0.616 | 0.36  |
| NOX4       | 4.68E-26 | 0.52108071  | 0.456 | 0.219 |
| TRAK1      | 6.51E-26 | 0.435684744 | 0.652 | 0.411 |
| PICALM     | 6.91E-26 | 0.442198038 | 0.976 | 0.847 |
| DLEU2      | 7.22E-26 | 0.517871881 | 0.774 | 0.536 |
| TM4SF18    | 9.17E-26 | 0.461487039 | 0.653 | 0.402 |
| SORBS2     | 1.56E-25 | 0.642763272 | 0.682 | 0.437 |
| RANBP17    | 1.84E-25 | 0.536429798 | 0.286 | 0.097 |
| CDC14B     | 2.08E-25 | 0.453833046 | 0.302 | 0.106 |
| AC004889.1 | 2.38E-25 | 0.520839936 | 0.276 | 0.094 |
| GTF2I      | 2.38E-25 | 0.332927594 | 0.822 | 0.618 |
| ABL2       | 2.45E-25 | 0.49749903  | 0.809 | 0.584 |
| CDC42EP1   | 2.52E-25 | 0.26871135  | 0.392 | 0.169 |
| KIAA1671   | 2.92E-25 | 0.464122711 | 0.705 | 0.458 |
| FBXL7      | 3.27E-25 | 0.481147959 | 0.913 | 0.718 |
| MACF1      | 3.42E-25 | 0.392341632 | 0.971 | 0.869 |
| SOS1       | 4.30E-25 | 0.374091929 | 0.815 | 0.585 |
| MCAM       | 4.98E-25 | 0.618854244 | 0.711 | 0.511 |
| PDE8A      | 7.22E-25 | 0.535211465 | 0.769 | 0.559 |
| SMARCA2    | 7.41E-25 | 0.43540824  | 0.817 | 0.617 |
| DDIT4      | 8.45E-25 | 0.641248255 | 0.676 | 0.449 |
| ISG15      | 1.03E-24 | 0.689652376 | 0.653 | 0.415 |
| GJC1       | 1.33E-24 | 0.257575099 | 0.263 | 0.084 |
| RBFOX2     | 1.38E-24 | 0.353494646 | 0.926 | 0.763 |
| LRP6       | 1.79E-24 | 0.38150115  | 0.596 | 0.343 |
| RAMP2      | 2.14E-24 | 0.448390973 | 0.926 | 0.78  |
| NOS3       | 2.17E-24 | 0.328744138 | 0.459 | 0.23  |
| MMP14      | 2.48E-24 | 0.297287622 | 0.319 | 0.12  |
| ZNF532     | 2.94E-24 | 0.422729334 | 0.51  | 0.273 |
| ARAP3      | 3.07E-24 | 0.412871457 | 0.518 | 0.288 |



|          |          |             |       |       |
|----------|----------|-------------|-------|-------|
| GFOD1    | 3.15E-24 | 0.602763349 | 0.73  | 0.51  |
| INPP5A   | 4.17E-24 | 0.397248983 | 0.518 | 0.277 |
| PKD1L1   | 5.81E-24 | 0.579262936 | 0.427 | 0.212 |
| CHSY3    | 7.59E-24 | 0.48264557  | 0.404 | 0.186 |
| MAST4    | 8.36E-24 | 0.593467859 | 0.907 | 0.697 |
| NDST1    | 8.50E-24 | 0.359412527 | 0.539 | 0.304 |
| KIF13A   | 8.98E-24 | 0.531599631 | 0.814 | 0.598 |
| CD93     | 1.03E-23 | 0.449251104 | 0.926 | 0.757 |
| IGFBP5   | 1.04E-23 | 1.529907581 | 0.308 | 0.121 |
| CYTH3    | 1.32E-23 | 0.349325164 | 0.393 | 0.174 |
| ROBO4    | 1.43E-23 | 0.383254458 | 0.711 | 0.516 |
| CD109    | 1.97E-23 | 0.500478263 | 0.721 | 0.478 |
| CALD1    | 2.05E-23 | 0.425925735 | 0.923 | 0.736 |
| GIT2     | 2.12E-23 | 0.357776629 | 0.445 | 0.22  |
| LUZP1    | 2.13E-23 | 0.392983367 | 0.851 | 0.696 |
| SH3PXD2A | 2.21E-23 | 0.346658908 | 0.515 | 0.285 |
| TOX2     | 2.42E-23 | 0.448199194 | 0.403 | 0.194 |
| PTPRB    | 2.73E-23 | 0.400269868 | 0.968 | 0.824 |
| UTRN     | 4.68E-23 | 0.504601617 | 0.979 | 0.866 |
| FSCN1    | 5.27E-23 | 0.394312912 | 0.578 | 0.366 |
| PKIG     | 5.58E-23 | 0.457824069 | 0.766 | 0.558 |
| ADAM17   | 5.79E-23 | 0.467825109 | 0.708 | 0.49  |
| LPP      | 5.89E-23 | 0.377534038 | 0.953 | 0.823 |
| MYO10    | 5.98E-23 | 0.446542471 | 0.716 | 0.485 |
| GRPEL2   | 6.51E-23 | 0.270842195 | 0.3   | 0.112 |
| FUT8     | 6.88E-23 | 0.546817132 | 0.483 | 0.263 |
| DAB2IP   | 6.93E-23 | 0.382966486 | 0.559 | 0.316 |
| DOCK1    | 7.69E-23 | 0.400715558 | 0.896 | 0.712 |
| ZDHHC20  | 7.81E-23 | 0.336750586 | 0.637 | 0.396 |
| CMTM8    | 8.46E-23 | 0.489550548 | 0.592 | 0.358 |
| CDC42BPA | 8.55E-23 | 0.473394953 | 0.857 | 0.664 |
| TBCD     | 8.70E-23 | 0.543895169 | 0.724 | 0.526 |
| JAG1     | 8.99E-23 | 0.799560323 | 0.642 | 0.432 |
| DDI2     | 1.40E-22 | 0.347809368 | 0.414 | 0.205 |
| CALM1    | 1.55E-22 | 0.4675001   | 0.947 | 0.882 |
| CYTOR    | 1.97E-22 | 0.4020563   | 0.597 | 0.362 |
| SPRED2   | 1.97E-22 | 0.467457709 | 0.539 | 0.315 |
| PCDH1    | 2.17E-22 | 0.309014678 | 0.498 | 0.263 |
| PTPRE    | 2.80E-22 | 0.58030979  | 0.79  | 0.605 |
| CYYR1    | 3.05E-22 | 0.454462224 | 0.891 | 0.706 |
| NSD1     | 4.05E-22 | 0.360180554 | 0.624 | 0.386 |
| UBE2J1   | 4.21E-22 | 0.300007735 | 0.669 | 0.452 |
| PLD1     | 4.31E-22 | 0.484946664 | 0.607 | 0.378 |

|          |          |             |       |       |
|----------|----------|-------------|-------|-------|
| MYO1E    | 4.53E-22 | 0.589693938 | 0.9   | 0.716 |
| PXDN     | 5.49E-22 | 0.493234875 | 0.737 | 0.513 |
| KLHL24   | 5.51E-22 | 0.400127452 | 0.604 | 0.373 |
| OAF      | 5.75E-22 | 0.257004343 | 0.438 | 0.212 |
| CALCRL   | 6.70E-22 | 0.582352803 | 0.95  | 0.86  |
| SOX13    | 6.97E-22 | 0.293380892 | 0.311 | 0.127 |
| PHLPP1   | 8.20E-22 | 0.437694456 | 0.592 | 0.369 |
| SWAP70   | 8.55E-22 | 0.379293682 | 0.926 | 0.788 |
| SLC26A2  | 8.99E-22 | 0.376352143 | 0.441 | 0.22  |
| APLP2    | 1.04E-21 | 0.350953694 | 0.892 | 0.748 |
| EIF4G2   | 1.22E-21 | 0.341641019 | 0.894 | 0.764 |
| EOGT     | 1.47E-21 | 0.362772004 | 0.512 | 0.286 |
| NOVA2    | 1.55E-21 | 0.341117451 | 0.451 | 0.233 |
| ARHGAP18 | 1.58E-21 | 0.525526574 | 0.575 | 0.38  |
| CRYBG3   | 1.71E-21 | 0.464104877 | 0.806 | 0.6   |
| SLC5A4   | 1.88E-21 | 0.288563598 | 0.25  | 0.087 |
| COL18A1  | 1.89E-21 | 0.467267503 | 0.828 | 0.649 |
| EIF4G3   | 2.47E-21 | 0.338892516 | 0.9   | 0.73  |
| SH2D3C   | 2.66E-21 | 0.3420155   | 0.571 | 0.33  |
| YEATS2   | 3.16E-21 | 0.33897102  | 0.547 | 0.321 |
| PLCG1    | 3.35E-21 | 0.348940097 | 0.494 | 0.278 |
| TEK      | 3.79E-21 | 0.329929642 | 0.793 | 0.585 |
| PRKY     | 4.26E-21 | 0.551693601 | 0.413 | 0.217 |
| ARHGEF7  | 4.39E-21 | 0.53464694  | 0.746 | 0.559 |
| VSIR     | 4.58E-21 | 0.376212176 | 0.499 | 0.289 |
| NEBL     | 4.59E-21 | 0.778924322 | 0.369 | 0.176 |
| ITGA6    | 4.65E-21 | 0.485862784 | 0.939 | 0.797 |
| AGAP1    | 5.06E-21 | 0.335928702 | 0.66  | 0.442 |
| APLNR    | 5.30E-21 | 0.511028651 | 0.539 | 0.325 |
| REST     | 5.68E-21 | 0.298438862 | 0.517 | 0.291 |
| MAP4K3   | 6.36E-21 | 0.380414472 | 0.648 | 0.419 |
| ADAM10   | 6.39E-21 | 0.35121031  | 0.819 | 0.614 |
| HES4     | 7.34E-21 | 0.391302012 | 0.321 | 0.134 |
| WDFY1    | 9.05E-21 | 0.312043997 | 0.663 | 0.431 |
| CLEC14A  | 9.25E-21 | 0.41871477  | 0.897 | 0.755 |
| LIMS2    | 9.85E-21 | 0.349841042 | 0.703 | 0.494 |
| VOPP1    | 1.03E-20 | 0.398042569 | 0.706 | 0.475 |
| HYAL2    | 1.15E-20 | 0.312016013 | 0.902 | 0.719 |
| DCLK2    | 1.34E-20 | 0.375512405 | 0.4   | 0.192 |
| TIMP3    | 1.36E-20 | 0.838196137 | 0.839 | 0.683 |
| NID1     | 1.85E-20 | 0.435549706 | 0.472 | 0.271 |
| PTBP2    | 1.89E-20 | 0.343043468 | 0.758 | 0.525 |
| TSPAN13  | 2.25E-20 | 0.433992686 | 0.559 | 0.343 |

|          |          |             |       |       |
|----------|----------|-------------|-------|-------|
| PLPP3    | 2.49E-20 | 0.498121294 | 0.759 | 0.557 |
| SRGAP2   | 2.49E-20 | 0.386437821 | 0.727 | 0.523 |
| HIP1R    | 3.18E-20 | 0.322762796 | 0.39  | 0.19  |
| XAF1     | 3.53E-20 | 0.373470485 | 0.762 | 0.528 |
| CRIP1    | 4.53E-20 | 0.558155254 | 0.645 | 0.42  |
| ULK4     | 5.05E-20 | 0.41242775  | 0.6   | 0.38  |
| RB1      | 5.19E-20 | 0.347573073 | 0.846 | 0.645 |
| PKN1     | 5.41E-20 | 0.257494319 | 0.6   | 0.388 |
| ADD1     | 5.46E-20 | 0.336483157 | 0.767 | 0.572 |
| ABCG1    | 5.77E-20 | 0.44295939  | 0.671 | 0.474 |
| MSX1     | 6.19E-20 | 0.293845804 | 0.316 | 0.134 |
| NAV2     | 6.86E-20 | 0.410232716 | 0.687 | 0.455 |
| GLG1     | 7.03E-20 | 0.324962372 | 0.758 | 0.534 |
| NEK7     | 7.18E-20 | 0.340605847 | 0.706 | 0.48  |
| MAP4K4   | 1.05E-19 | 0.327762785 | 0.86  | 0.688 |
| SPRED1   | 1.26E-19 | 0.409351337 | 0.547 | 0.329 |
| CC2D2B   | 1.37E-19 | 0.460803232 | 0.506 | 0.287 |
| ASS1     | 1.43E-19 | 0.365898344 | 0.348 | 0.166 |
| INPP5D   | 1.44E-19 | 0.375035174 | 0.504 | 0.289 |
| SHANK3   | 1.51E-19 | 0.309390642 | 0.788 | 0.593 |
| FN1      | 1.67E-19 | 0.991950958 | 0.517 | 0.31  |
| BCAS3    | 2.04E-19 | 0.389236599 | 0.803 | 0.569 |
| PLS3     | 2.07E-19 | 0.432225407 | 0.791 | 0.589 |
| FAM214A  | 2.16E-19 | 0.367769045 | 0.676 | 0.45  |
| ARHGAP24 | 2.18E-19 | 0.447926439 | 0.472 | 0.258 |
| ITGA5    | 2.33E-19 | 0.38718169  | 0.849 | 0.693 |
| TAOK1    | 2.39E-19 | 0.342333487 | 0.756 | 0.552 |
| TMEM47   | 2.89E-19 | 0.282695266 | 0.34  | 0.156 |
| CPNE2    | 3.14E-19 | 0.280322931 | 0.491 | 0.28  |
| NREP     | 3.44E-19 | 0.369967365 | 0.573 | 0.359 |
| ZMIZ1    | 4.59E-19 | 0.358589524 | 0.616 | 0.402 |
| PELI1    | 4.64E-19 | 0.416008135 | 0.857 | 0.65  |
| DAB2     | 4.98E-19 | 0.291447614 | 0.618 | 0.415 |
| EPHA4    | 5.74E-19 | 0.490692655 | 0.708 | 0.508 |
| COL6A2   | 6.34E-19 | 0.371343415 | 0.482 | 0.265 |
| MPZL1    | 7.05E-19 | 0.270104023 | 0.526 | 0.311 |
| CDK19    | 7.10E-19 | 0.326958162 | 0.413 | 0.206 |
| CDC27    | 7.24E-19 | 0.320928104 | 0.761 | 0.543 |
| SMAD2    | 8.49E-19 | 0.300586576 | 0.735 | 0.546 |
| NPTN     | 8.61E-19 | 0.372572199 | 0.591 | 0.383 |
| COL21A1  | 1.00E-18 | 0.392206185 | 0.25  | 0.095 |
| TMEM150C | 1.06E-18 | 0.275883067 | 0.35  | 0.169 |
| KIAA1217 | 1.17E-18 | 0.468291046 | 0.767 | 0.571 |

|          |          |             |       |       |
|----------|----------|-------------|-------|-------|
| CADPS2   | 1.35E-18 | 0.401780861 | 0.942 | 0.762 |
| BCL6B    | 1.38E-18 | 0.256751998 | 0.427 | 0.228 |
| NAA38    | 1.45E-18 | 0.271251626 | 0.772 | 0.575 |
| FAM53B   | 1.45E-18 | 0.266248067 | 0.347 | 0.162 |
| MTSS1    | 1.62E-18 | 0.439490179 | 0.47  | 0.27  |
| SIPA1L3  | 1.72E-18 | 0.377239711 | 0.507 | 0.31  |
| ABCB1    | 1.84E-18 | 0.61763201  | 0.811 | 0.577 |
| TSPAN14  | 2.26E-18 | 0.311187002 | 0.756 | 0.548 |
| EHD4     | 2.43E-18 | 0.374123187 | 0.833 | 0.666 |
| PIAS2    | 2.59E-18 | 0.301643672 | 0.488 | 0.28  |
| PITPNM2  | 2.65E-18 | 0.286194673 | 0.427 | 0.223 |
| PKN3     | 2.65E-18 | 0.272186223 | 0.525 | 0.31  |
| TACC2    | 2.91E-18 | 0.391473446 | 0.523 | 0.325 |
| ACVRL1   | 2.95E-18 | 0.336234157 | 0.693 | 0.508 |
| NOTCH1   | 3.37E-18 | 0.354470764 | 0.552 | 0.356 |
| PTPN12   | 3.76E-18 | 0.322598042 | 0.9   | 0.736 |
| DIAPH2   | 3.86E-18 | 0.343729258 | 0.934 | 0.752 |
| DENND3   | 4.28E-18 | 0.29527871  | 0.459 | 0.256 |
| ARHGAP5  | 4.65E-18 | 0.309539505 | 0.515 | 0.319 |
| PLEKHA1  | 6.44E-18 | 0.337400154 | 0.703 | 0.505 |
| ARHGAP31 | 6.73E-18 | 0.352637662 | 0.897 | 0.714 |
| EMCN     | 7.60E-18 | 0.484400791 | 0.917 | 0.794 |
| TBC1D9   | 7.67E-18 | 0.312754908 | 0.716 | 0.503 |
| NEAT1    | 7.85E-18 | 0.451522894 | 0.989 | 0.89  |
| ERC1     | 8.01E-18 | 0.36176165  | 0.884 | 0.722 |
| PIK3C2B  | 8.42E-18 | 0.295182262 | 0.47  | 0.258 |
| BMP6     | 9.18E-18 | 0.439362553 | 0.417 | 0.219 |
| DISC1    | 9.50E-18 | 0.395856684 | 0.708 | 0.515 |
| NUMB     | 1.02E-17 | 0.305705154 | 0.828 | 0.638 |
| ATXN1    | 1.07E-17 | 0.410175669 | 0.774 | 0.547 |
| IL32     | 1.21E-17 | 0.367099937 | 0.57  | 0.359 |
| YES1     | 1.56E-17 | 0.278130985 | 0.851 | 0.682 |
| HBEGF    | 1.76E-17 | 0.276315965 | 0.517 | 0.293 |
| MGAT4A   | 2.07E-17 | 0.272526186 | 0.714 | 0.495 |
| SNX29    | 2.87E-17 | 0.271822647 | 0.571 | 0.364 |
| SPIRE1   | 3.03E-17 | 0.341223986 | 0.555 | 0.343 |
| ADGRG1   | 3.10E-17 | 0.288219198 | 0.612 | 0.41  |
| SRGAP2B  | 3.82E-17 | 0.332704264 | 0.549 | 0.347 |
| HPCAL1   | 4.25E-17 | 0.395119835 | 0.581 | 0.384 |
| SYT11    | 4.53E-17 | 0.252109897 | 0.319 | 0.152 |
| PRKX     | 4.60E-17 | 0.402503069 | 0.352 | 0.18  |
| SH3TC1   | 4.71E-17 | 0.385196829 | 0.52  | 0.33  |
| LRCH1    | 5.30E-17 | 0.358781223 | 0.892 | 0.729 |

|          |          |             |       |       |
|----------|----------|-------------|-------|-------|
| CLSTN1   | 5.61E-17 | 0.297857375 | 0.517 | 0.313 |
| ADAMTSL1 | 6.23E-17 | 0.64183095  | 0.429 | 0.245 |
| PRKD1    | 6.26E-17 | 0.415193741 | 0.602 | 0.389 |
| CTIF     | 6.38E-17 | 0.345895082 | 0.515 | 0.323 |
| GAS6     | 6.58E-17 | 0.436664594 | 0.56  | 0.361 |
| EIF2AK4  | 6.82E-17 | 0.279601334 | 0.583 | 0.39  |
| ADIPOR2  | 7.48E-17 | 0.368860619 | 0.767 | 0.557 |
| CALU     | 7.86E-17 | 0.255102447 | 0.737 | 0.535 |
| LIMCH1   | 9.06E-17 | 0.519923104 | 0.743 | 0.552 |
| SH3PXD2B | 1.12E-16 | 0.403950279 | 0.392 | 0.211 |
| UBE4B    | 1.57E-16 | 0.353933722 | 0.536 | 0.345 |
| RFTN1    | 1.85E-16 | 0.480646457 | 0.687 | 0.498 |
| SPG7     | 2.00E-16 | 0.358459714 | 0.637 | 0.434 |
| SMAD7    | 2.15E-16 | 0.270791733 | 0.4   | 0.216 |
| FRMD4B   | 2.23E-16 | 0.288590465 | 0.812 | 0.632 |
| TCF7L1   | 2.33E-16 | 0.321244459 | 0.543 | 0.35  |
| CCDC85B  | 2.49E-16 | 0.300221865 | 0.875 | 0.729 |
| TLE3     | 2.75E-16 | 0.26381882  | 0.388 | 0.21  |
| CDK2AP1  | 3.36E-16 | 0.293917225 | 0.615 | 0.43  |
| ADGRL2   | 3.55E-16 | 0.592394209 | 0.762 | 0.623 |
| SLC44A2  | 3.92E-16 | 0.276076927 | 0.624 | 0.434 |
| ARHGEF10 | 4.00E-16 | 0.323303267 | 0.528 | 0.325 |
| SORBS1   | 4.17E-16 | 0.685530708 | 0.61  | 0.43  |
| RNF144A  | 4.24E-16 | 0.340166835 | 0.478 | 0.293 |
| TMCC1    | 4.41E-16 | 0.396594061 | 0.56  | 0.363 |
| ENTPD1   | 4.50E-16 | 0.313319936 | 0.867 | 0.656 |
| PLCG2    | 5.06E-16 | 0.30686685  | 0.543 | 0.34  |
| JAZF1    | 5.13E-16 | 0.307862439 | 0.559 | 0.357 |
| XPR1     | 5.35E-16 | 0.314371366 | 0.695 | 0.487 |
| TJP2     | 5.39E-16 | 0.288533984 | 0.634 | 0.429 |
| RUNDC3B  | 5.72E-16 | 0.426075031 | 0.555 | 0.352 |
| ELK3     | 6.20E-16 | 0.275380834 | 0.925 | 0.79  |
| TAX1BP3  | 6.80E-16 | 0.278844779 | 0.576 | 0.387 |
| TCF4     | 8.04E-16 | 0.285865215 | 0.997 | 0.938 |
| WWC2     | 8.31E-16 | 0.331962217 | 0.689 | 0.483 |
| PIK3R3   | 8.77E-16 | 0.458373102 | 0.86  | 0.714 |
| PAPSS1   | 1.59E-15 | 0.260279691 | 0.422 | 0.242 |
| MAGI1    | 1.61E-15 | 0.326332551 | 0.973 | 0.845 |
| FOXN3    | 1.71E-15 | 0.337044226 | 0.849 | 0.673 |
| RASAL2   | 1.74E-15 | 0.415644065 | 0.912 | 0.806 |
| FKBP9    | 1.82E-15 | 0.263761925 | 0.666 | 0.471 |
| KITLG    | 1.85E-15 | 0.267579345 | 0.443 | 0.251 |
| EEPD1    | 1.87E-15 | 0.333000304 | 0.372 | 0.199 |

|          |          |             |       |       |
|----------|----------|-------------|-------|-------|
| MAML2    | 2.06E-15 | 0.281227716 | 0.844 | 0.653 |
| RNF144B  | 2.28E-15 | 0.365118728 | 0.308 | 0.149 |
| MPRIIP   | 2.55E-15 | 0.283060238 | 0.703 | 0.517 |
| ZNF827   | 2.55E-15 | 0.257451274 | 0.339 | 0.167 |
| LRRC8C   | 2.72E-15 | 0.288003092 | 0.756 | 0.565 |
| ATP2A2   | 2.73E-15 | 0.298564729 | 0.682 | 0.481 |
| RHOC     | 2.90E-15 | 0.251815365 | 0.849 | 0.696 |
| FAT4     | 3.46E-15 | 0.316667263 | 0.514 | 0.319 |
| SMURF2   | 4.47E-15 | 0.381933994 | 0.785 | 0.605 |
| CLASP2   | 4.77E-15 | 0.253895864 | 0.623 | 0.42  |
| NEDD4L   | 4.90E-15 | 0.333390535 | 0.441 | 0.255 |
| HMOX2    | 4.92E-15 | 0.268812099 | 0.518 | 0.329 |
| LBH      | 4.92E-15 | 0.446215633 | 0.414 | 0.251 |
| ADCY4    | 4.93E-15 | 0.276827625 | 0.79  | 0.622 |
| MCC      | 5.44E-15 | 0.379645716 | 0.648 | 0.447 |
| FNDC3B   | 5.85E-15 | 0.291533216 | 0.955 | 0.834 |
| QKI      | 6.38E-15 | 0.281208495 | 0.933 | 0.784 |
| NRP1     | 6.45E-15 | 0.428193586 | 0.88  | 0.748 |
| EPAS1    | 6.50E-15 | 0.333362353 | 0.998 | 0.892 |
| WWTR1    | 6.80E-15 | 0.282392551 | 0.97  | 0.844 |
| WWC3     | 7.15E-15 | 0.298684427 | 0.48  | 0.295 |
| TTYH3    | 7.62E-15 | 0.278053353 | 0.353 | 0.188 |
| PDS5B    | 9.17E-15 | 0.299069861 | 0.697 | 0.512 |
| HS2ST1   | 9.77E-15 | 0.351558137 | 0.464 | 0.289 |
| DYNC1H1  | 1.00E-14 | 0.275868956 | 0.806 | 0.65  |
| CTNND1   | 1.01E-14 | 0.256164317 | 0.864 | 0.718 |
| PALMD    | 1.06E-14 | 0.30720473  | 0.928 | 0.76  |
| DST      | 1.12E-14 | 0.551585521 | 0.681 | 0.545 |
| RABGAP1  | 1.22E-14 | 0.333922724 | 0.756 | 0.565 |
| RC3H2    | 1.29E-14 | 0.256157527 | 0.587 | 0.387 |
| CCDC88C  | 1.35E-14 | 0.323317115 | 0.34  | 0.18  |
| PPP1R13B | 1.37E-14 | 0.283905071 | 0.746 | 0.543 |
| ANKRD50  | 1.39E-14 | 0.288838702 | 0.401 | 0.231 |
| DIP2B    | 1.60E-14 | 0.306746216 | 0.65  | 0.461 |
| OLFML2A  | 1.67E-14 | 0.282796485 | 0.348 | 0.189 |
| PPP3CC   | 1.88E-14 | 0.273127122 | 0.551 | 0.363 |
| RHOB     | 2.27E-14 | 0.488631218 | 0.756 | 0.598 |
| CHSY1    | 2.31E-14 | 0.358497564 | 0.748 | 0.58  |
| SLC2A13  | 2.59E-14 | 0.278100696 | 0.276 | 0.13  |
| TOP2B    | 2.82E-14 | 0.256446279 | 0.608 | 0.423 |
| FCHO2    | 2.93E-14 | 0.296986517 | 0.803 | 0.617 |
| TPM1     | 3.13E-14 | 0.287789495 | 0.567 | 0.387 |
| ZBTB46   | 3.30E-14 | 0.321898133 | 0.465 | 0.29  |

|            |          |             |       |       |
|------------|----------|-------------|-------|-------|
| EFCAB14    | 3.35E-14 | 0.330421766 | 0.616 | 0.434 |
| CLIC4      | 3.44E-14 | 0.348397533 | 0.896 | 0.748 |
| ZNF704     | 3.61E-14 | 0.38959344  | 0.315 | 0.16  |
| HIPK2      | 3.86E-14 | 0.261698055 | 0.597 | 0.395 |
| NCKAP1     | 3.86E-14 | 0.252733594 | 0.82  | 0.656 |
| ERBIN      | 3.97E-14 | 0.314278842 | 0.835 | 0.669 |
| RALA       | 4.32E-14 | 0.259350009 | 0.687 | 0.5   |
| GRK5       | 4.40E-14 | 0.286098729 | 0.748 | 0.564 |
| AL139383.1 | 4.57E-14 | 0.299556222 | 0.252 | 0.114 |
| FADS3      | 4.89E-14 | 0.288704466 | 0.35  | 0.193 |
| UNC13B     | 5.03E-14 | 0.34600308  | 0.462 | 0.29  |
| UBR3       | 5.32E-14 | 0.321017924 | 0.655 | 0.475 |
| ABLIM2     | 5.66E-14 | 0.365025902 | 0.618 | 0.437 |
| MAP4K3-DT  | 6.65E-14 | 0.263309666 | 0.358 | 0.2   |
| UPF3A      | 7.36E-14 | 0.253171438 | 0.665 | 0.474 |
| EGFL7      | 7.52E-14 | 0.262689981 | 0.91  | 0.737 |
| ANKRD11    | 7.86E-14 | 0.270936778 | 0.838 | 0.703 |
| GPHN       | 9.02E-14 | 0.258884681 | 0.817 | 0.615 |
| COP1       | 9.06E-14 | 0.252826798 | 0.785 | 0.593 |
| ARHGEF28   | 9.29E-14 | 0.3250987   | 0.658 | 0.486 |
| KLHL18     | 9.80E-14 | 0.329406449 | 0.416 | 0.245 |
| DENND5A    | 1.12E-13 | 0.264602146 | 0.689 | 0.507 |
| FRYL       | 1.26E-13 | 0.326339676 | 0.9   | 0.752 |
| CCNY       | 1.26E-13 | 0.380374198 | 0.856 | 0.706 |
| BIRC6      | 1.32E-13 | 0.251240242 | 0.873 | 0.719 |
| TTC37      | 1.59E-13 | 0.292647564 | 0.579 | 0.396 |
| ZNF148     | 1.69E-13 | 0.273523197 | 0.73  | 0.535 |
| MEF2C      | 1.71E-13 | 0.28162189  | 0.934 | 0.79  |
| MAGI3      | 1.73E-13 | 0.316557421 | 0.571 | 0.382 |
| MAD1L1     | 1.80E-13 | 0.264576304 | 0.371 | 0.211 |
| ANKRD28    | 1.94E-13 | 0.283604534 | 0.809 | 0.641 |
| ST8SIA4    | 2.89E-13 | 0.339446315 | 0.499 | 0.334 |
| CLASP1     | 2.91E-13 | 0.323670454 | 0.729 | 0.573 |
| PTPN4      | 5.25E-13 | 0.269305883 | 0.474 | 0.296 |
| NPC1       | 5.44E-13 | 0.285165098 | 0.578 | 0.382 |
| SPATA6     | 5.94E-13 | 0.25141667  | 0.337 | 0.184 |
| OPHN1      | 6.79E-13 | 0.293092096 | 0.538 | 0.356 |
| AOPEP      | 7.97E-13 | 0.30806588  | 0.88  | 0.711 |
| GOLIM4     | 8.10E-13 | 0.267505518 | 0.579 | 0.403 |
| JARID2     | 8.33E-13 | 0.265509018 | 0.708 | 0.531 |
| LINC00472  | 1.15E-12 | 0.355455518 | 0.39  | 0.234 |
| EXOC6B     | 1.17E-12 | 0.341599362 | 0.83  | 0.639 |
| MMRN2      | 1.34E-12 | 0.28145372  | 0.788 | 0.615 |

|             |          |             |       |       |
|-------------|----------|-------------|-------|-------|
| PRRC2B      | 1.41E-12 | 0.263616321 | 0.75  | 0.598 |
| CTTNBP2NL   | 1.48E-12 | 0.273873086 | 0.819 | 0.654 |
| IVNS1ABP    | 1.84E-12 | 0.378022693 | 0.668 | 0.507 |
| EDNRB       | 1.84E-12 | 0.473364447 | 0.313 | 0.175 |
| LMBR1       | 1.86E-12 | 0.284222261 | 0.812 | 0.676 |
| ATXN2       | 2.17E-12 | 0.259498909 | 0.726 | 0.539 |
| SPTBN1      | 2.41E-12 | 0.258030449 | 0.99  | 0.896 |
| MGAT5       | 2.94E-12 | 0.255165298 | 0.655 | 0.469 |
| UBE2H       | 3.18E-12 | 0.257969496 | 0.86  | 0.708 |
| LGALS1      | 3.92E-12 | 0.40797241  | 0.732 | 0.56  |
| TRIM2       | 4.41E-12 | 0.283107551 | 0.316 | 0.178 |
| PBX3        | 4.72E-12 | 0.282321331 | 0.403 | 0.251 |
| MGMT        | 5.00E-12 | 0.252970868 | 0.791 | 0.612 |
| ZHX3        | 5.06E-12 | 0.293049579 | 0.657 | 0.487 |
| EMP1        | 7.21E-12 | 0.352730121 | 0.958 | 0.886 |
| IQCJ-SCHIP1 | 7.30E-12 | 0.352578882 | 0.631 | 0.461 |
| KLHL29      | 7.32E-12 | 0.303972347 | 0.411 | 0.248 |
| RAB11FIP3   | 7.72E-12 | 0.259534617 | 0.493 | 0.318 |
| NLK         | 7.73E-12 | 0.340225506 | 0.673 | 0.501 |
| CEP350      | 1.08E-11 | 0.262796705 | 0.729 | 0.565 |
| LDB2        | 1.14E-11 | 0.358590207 | 0.97  | 0.874 |
| DPYSL3      | 1.29E-11 | 0.252384097 | 0.754 | 0.611 |
| FBXW7       | 1.45E-11 | 0.296409189 | 0.75  | 0.587 |
| BDKRB2      | 1.75E-11 | 0.322638371 | 0.482 | 0.323 |
| ITCH        | 2.24E-11 | 0.25167284  | 0.64  | 0.468 |
| PGM2L1      | 2.26E-11 | 0.261710132 | 0.49  | 0.324 |
| IFI27       | 2.48E-11 | 0.32526749  | 0.965 | 0.857 |
| NRIP1       | 2.51E-11 | 0.325713581 | 0.708 | 0.549 |
| ZFYVE28     | 2.55E-11 | 0.306828727 | 0.424 | 0.271 |
| FBXL20      | 2.76E-11 | 0.267014064 | 0.472 | 0.314 |
| ATXN7L1     | 3.74E-11 | 0.264646037 | 0.445 | 0.286 |
| VEGFC       | 3.77E-11 | 0.348201242 | 0.652 | 0.479 |
| STARD13     | 5.10E-11 | 0.25713189  | 0.859 | 0.684 |
| CSGALNACT1  | 5.47E-11 | 0.318442774 | 0.88  | 0.73  |
| TNKS        | 6.45E-11 | 0.265620848 | 0.661 | 0.494 |
| WWOX        | 7.12E-11 | 0.364492347 | 0.695 | 0.527 |
| THSD7A      | 1.00E-10 | 0.434965142 | 0.851 | 0.739 |
| GBE1        | 1.04E-10 | 0.382818003 | 0.653 | 0.491 |
| TJP1        | 1.10E-10 | 0.250043883 | 0.912 | 0.813 |
| MAP4        | 1.42E-10 | 0.272748689 | 0.864 | 0.73  |
| ZNF407      | 1.88E-10 | 0.298095825 | 0.687 | 0.545 |
| BTBD3       | 1.92E-10 | 0.27460929  | 0.417 | 0.274 |
| NR2C2       | 2.32E-10 | 0.269984828 | 0.486 | 0.328 |



|            |             |             |       |       |
|------------|-------------|-------------|-------|-------|
| RGL1       | 2.78E-10    | 0.324741933 | 0.404 | 0.261 |
| TANC1      | 2.99E-10    | 0.252573059 | 0.857 | 0.715 |
| NRP2       | 6.24E-10    | 0.32525166  | 0.599 | 0.473 |
| MIDN       | 8.09E-10    | 0.281206103 | 0.735 | 0.569 |
| GAB1       | 9.34E-10    | 0.309590147 | 0.525 | 0.38  |
| RBMS3      | 1.68E-09    | 0.288038233 | 0.9   | 0.755 |
| SRPK2      | 1.97E-09    | 0.266579928 | 0.77  | 0.632 |
| SOX4       | 2.81E-09    | 0.302190543 | 0.628 | 0.491 |
| DACH1      | 3.18E-09    | 0.348766412 | 0.631 | 0.483 |
| FSTL1      | 3.41E-09    | 0.284877237 | 0.734 | 0.594 |
| IFI6       | 3.57E-09    | 0.278376383 | 0.6   | 0.461 |
| PTPRJ      | 3.60E-09    | 0.344997253 | 0.268 | 0.157 |
| NFIB       | 3.74E-09    | 0.262322323 | 0.982 | 0.893 |
| RAPGEF4    | 5.98E-09    | 0.350126457 | 0.881 | 0.755 |
| NUDT4      | 9.42E-09    | 0.328551399 | 0.453 | 0.318 |
| SRP14      | 1.06E-08    | 0.447244635 | 0.937 | 0.879 |
| CASC15     | 1.51E-08    | 0.285601071 | 0.621 | 0.489 |
| CACHD1     | 1.73E-08    | 0.293193779 | 0.637 | 0.48  |
| FLNB       | 1.76E-08    | 0.259126596 | 0.803 | 0.677 |
| LNX1       | 3.22E-08    | 0.446709173 | 0.26  | 0.154 |
| ATP13A3    | 4.10E-08    | 0.429661577 | 0.507 | 0.381 |
| PAPSS2     | 6.28E-08    | 0.273498097 | 0.313 | 0.197 |
| DLC1       | 6.44E-08    | 0.268609662 | 0.798 | 0.659 |
| CD320      | 2.83E-07    | 0.321434065 | 0.648 | 0.518 |
| PRSS23     | 4.69E-07    | 0.297557608 | 0.828 | 0.733 |
| PLEKHG1    | 7.83E-07    | 0.254682669 | 0.944 | 0.807 |
| MTOR       | 1.07E-06    | 0.393998679 | 0.345 | 0.236 |
| HMCN1      | 1.21E-06    | 0.444479881 | 0.3   | 0.203 |
| FILIP1     | 3.54E-06    | 0.25140091  | 0.584 | 0.472 |
| CRADD      | 5.95E-06    | 0.280541616 | 0.413 | 0.315 |
| NR5A2      | 1.19E-05    | 0.255395101 | 0.584 | 0.474 |
| CCDC85A    | 1.77E-05    | 0.332085487 | 0.347 | 0.253 |
| EMP3       | 3.55E-05    | 0.255603951 | 0.348 | 0.259 |
| PPARG      | 4.43E-05    | 0.338296374 | 0.321 | 0.238 |
| SYNJ2      | 4.61E-05    | 0.259820947 | 0.541 | 0.435 |
| S100A4     | 4.92E-05    | 0.365285541 | 0.315 | 0.228 |
| SLC2A3     | 5.10E-05    | 0.278407264 | 0.82  | 0.711 |
| DEPP1      | 5.33E-05    | 0.596117267 | 0.469 | 0.377 |
| SULF1      | 0.001770578 | 0.302708095 | 0.191 | 0.274 |
| AL583785.1 | 0.005212965 | 0.254399287 | 0.456 | 0.393 |
| CCL21      | 7.30E-52    | 5.889986062 | 0.256 | 0.027 |
| MPP7       | 1.17E-50    | 1.21790486  | 0.292 | 0.041 |
| MAF        | 1.65E-38    | 1.044171876 | 0.277 | 0.054 |

|           |          |             |       |       |
|-----------|----------|-------------|-------|-------|
| TC2N      | 3.20E-33 | 0.970092613 | 0.253 | 0.052 |
| FTH1      | 9.52E-26 | 1.21384172  | 0.884 | 0.955 |
| FTL       | 8.52E-22 | 1.042856062 | 0.869 | 0.933 |
| RAB11FIP1 | 2.62E-18 | 0.717499912 | 0.298 | 0.121 |
| LAPTM5    | 5.18E-16 | 1.083075315 | 0.375 | 0.217 |
| FAM107B   | 1.49E-12 | 1.112313216 | 0.387 | 0.251 |
| TSPAN5    | 1.07E-10 | 1.106452088 | 0.304 | 0.178 |
| VAV3      | 1.47E-10 | 0.917392177 | 0.295 | 0.167 |
| OAZ1      | 1.16E-09 | 0.852660319 | 0.685 | 0.805 |
| DDX46     | 1.25E-09 | 0.392841876 | 0.396 | 0.678 |
| B2M       | 1.91E-09 | 0.464001852 | 0.976 | 0.995 |
| CNOT6L    | 2.00E-09 | 0.255774487 | 0.432 | 0.767 |
| GYPC      | 3.97E-09 | 1.185489473 | 0.438 | 0.361 |
| EIF1      | 6.58E-09 | 0.511347783 | 0.893 | 0.977 |
| ATP5F1E   | 1.59E-08 | 0.760370682 | 0.774 | 0.915 |
| GNG10     | 2.87E-08 | 0.257160106 | 0.381 | 0.613 |
| PPM1B     | 3.04E-08 | 0.255867878 | 0.208 | 0.398 |
| PPFIBP1   | 3.28E-08 | 0.514329376 | 0.485 | 0.867 |
| UBA52     | 8.84E-08 | 0.541744279 | 0.768 | 0.93  |
| CHCHD10   | 1.09E-07 | 0.477225365 | 0.28  | 0.176 |
| ACTB      | 1.61E-07 | 0.550701346 | 0.875 | 0.957 |
| FAU       | 3.60E-07 | 0.51746508  | 0.824 | 0.934 |
| RBP1      | 4.31E-07 | 0.61708265  | 0.256 | 0.165 |
| CLEC2B    | 5.60E-07 | 0.30322338  | 0.47  | 0.726 |
| SELENOS   | 5.71E-07 | 0.272120144 | 0.342 | 0.567 |
| RPN2      | 6.08E-07 | 0.325443949 | 0.393 | 0.649 |
| ATOX1     | 6.47E-07 | 0.319460033 | 0.44  | 0.701 |
| CMSS1     | 6.69E-07 | 0.377604562 | 0.315 | 0.51  |
| SMCHD1    | 8.05E-07 | 0.55733913  | 0.47  | 0.776 |
| EEF1A1    | 9.89E-07 | 0.490825462 | 0.943 | 0.994 |
| TCEAL4    | 1.47E-06 | 0.309118149 | 0.396 | 0.641 |
| LARS      | 1.50E-06 | 0.26220086  | 0.375 | 0.585 |
| LAP3      | 1.74E-06 | 0.257569408 | 0.423 | 0.653 |
| MYL6      | 1.93E-06 | 0.549800331 | 0.812 | 0.935 |
| ZMYM2     | 2.89E-06 | 0.257899405 | 0.348 | 0.578 |
| MYDGF     | 3.44E-06 | 0.343867468 | 0.354 | 0.594 |
| RCN2      | 3.66E-06 | 0.293207708 | 0.289 | 0.474 |
| ERCC1     | 3.92E-06 | 0.25136864  | 0.283 | 0.473 |
| THSD4     | 5.22E-06 | 0.763970378 | 0.277 | 0.183 |
| TPT11     | 5.33E-06 | 0.532780991 | 0.938 | 0.99  |
| RAB1A     | 6.11E-06 | 0.260684442 | 0.482 | 0.742 |
| GNAS      | 6.25E-06 | 0.434391394 | 0.854 | 0.967 |
| SNRPF     | 6.94E-06 | 0.250044204 | 0.372 | 0.59  |

|          |             |             |       |       |
|----------|-------------|-------------|-------|-------|
| TRIOBP   | 7.10E-06    | 0.25398057  | 0.42  | 0.666 |
| CD461    | 7.19E-06    | 0.277568759 | 0.497 | 0.706 |
| HNRNPH3  | 7.96E-06    | 0.252480339 | 0.411 | 0.663 |
| PYURF    | 8.55E-06    | 0.347035276 | 0.33  | 0.536 |
| PFKL     | 1.09E-05    | 0.283414784 | 0.211 | 0.367 |
| NPM1     | 1.19E-05    | 0.685170602 | 0.729 | 0.89  |
| H3F3A    | 1.26E-05    | 0.497271257 | 0.836 | 0.946 |
| RALBP1   | 1.59E-05    | 0.368423675 | 0.414 | 0.649 |
| MCFD2    | 1.89E-05    | 0.261971987 | 0.307 | 0.504 |
| SSR3     | 1.93E-05    | 0.438317764 | 0.384 | 0.607 |
| ARHGDIB  | 2.04E-05    | 0.421496197 | 0.369 | 0.66  |
| TAF1D    | 2.15E-05    | 0.303404873 | 0.467 | 0.701 |
| LGALS11  | 2.17E-05    | 0.72849651  | 0.616 | 0.622 |
| KLF12    | 2.31E-05    | 0.668509275 | 0.274 | 0.186 |
| PHF20L1  | 2.90E-05    | 0.331452415 | 0.342 | 0.528 |
| ACTR2    | 3.07E-05    | 0.254039843 | 0.554 | 0.795 |
| SLC38A1  | 3.10E-05    | 0.563760799 | 0.351 | 0.288 |
| TMEM179B | 3.16E-05    | 0.264923187 | 0.312 | 0.504 |
| TIMM9    | 3.20E-05    | 0.259454301 | 0.167 | 0.296 |
| NRN11    | 3.24E-05    | 0.268949035 | 0.333 | 0.538 |
| TXNDC17  | 3.91E-05    | 0.250020282 | 0.31  | 0.489 |
| IFT20    | 4.21E-05    | 0.345078361 | 0.214 | 0.367 |
| HEBP2    | 4.41E-05    | 0.256025311 | 0.369 | 0.556 |
| DDX1     | 4.82E-05    | 0.29959833  | 0.256 | 0.397 |
| PPM1G    | 5.07E-05    | 0.255848103 | 0.405 | 0.613 |
| S100A10  | 5.37E-05    | 0.59248215  | 0.795 | 0.926 |
| OCIAD2   | 5.68E-05    | 0.316467102 | 0.301 | 0.489 |
| PFDN1    | 6.10E-05    | 0.319693216 | 0.345 | 0.537 |
| TSPAN3   | 6.16E-05    | 0.35237937  | 0.315 | 0.476 |
| PDCD5    | 6.55E-05    | 0.423798717 | 0.351 | 0.556 |
| PSMA6    | 7.35E-05    | 0.270709406 | 0.455 | 0.697 |
| VIM      | 7.43E-05    | 0.576395637 | 0.938 | 0.992 |
| NDUFB1   | 8.07E-05    | 0.293787902 | 0.36  | 0.554 |
| TMEM88   | 8.27E-05    | 0.428064256 | 0.232 | 0.394 |
| NAA381   | 8.54E-05    | 0.257587685 | 0.452 | 0.689 |
| NDUFA8   | 9.38E-05    | 0.408646206 | 0.292 | 0.472 |
| NDUFB9   | 0.0001003   | 0.284460452 | 0.372 | 0.574 |
| SMAP2    | 0.000107256 | 0.708139266 | 0.274 | 0.212 |
| TRIM38   | 0.000111336 | 0.28903974  | 0.226 | 0.362 |
| METTL9   | 0.000112629 | 0.33911725  | 0.357 | 0.56  |
| LMAN1    | 0.000119943 | 0.349764417 | 0.423 | 0.661 |
| SCP2     | 0.000130752 | 0.257823517 | 0.423 | 0.654 |
| TMSB10   | 0.000131141 | 0.389182401 | 0.943 | 0.997 |

|           |             |             |       |       |
|-----------|-------------|-------------|-------|-------|
| GNG5      | 0.00013317  | 0.306916403 | 0.586 | 0.825 |
| MRPL51    | 0.000135009 | 0.284396014 | 0.381 | 0.602 |
| TKT       | 0.000137531 | 0.315781047 | 0.348 | 0.544 |
| ROMO1     | 0.000138977 | 0.281246825 | 0.339 | 0.515 |
| ARPC4     | 0.00014082  | 0.269911871 | 0.336 | 0.528 |
| PPP1R14B  | 0.00014613  | 0.349101537 | 0.402 | 0.622 |
| HES1      | 0.000150305 | 0.281946355 | 0.435 | 0.636 |
| SBDS      | 0.000158311 | 0.322969179 | 0.455 | 0.66  |
| TBRG1     | 0.000162644 | 0.259126427 | 0.333 | 0.499 |
| GET3      | 0.000169209 | 0.252900467 | 0.19  | 0.322 |
| SLC25A5   | 0.000199657 | 0.253986243 | 0.423 | 0.634 |
| PTMA      | 0.000201097 | 0.404790465 | 0.961 | 0.985 |
| FAM32A    | 0.000214782 | 0.330360669 | 0.214 | 0.345 |
| HDAC1     | 0.000224457 | 0.317862358 | 0.277 | 0.437 |
| MMP21     | 0.000242638 | 0.268194078 | 0.25  | 0.381 |
| CFL1      | 0.000275185 | 0.485930843 | 0.765 | 0.908 |
| CHMP5     | 0.000277242 | 0.344921538 | 0.378 | 0.566 |
| LAMP1     | 0.000298475 | 0.336415972 | 0.429 | 0.661 |
| EML4      | 0.000321002 | 0.289572977 | 0.381 | 0.594 |
| SNHG16    | 0.000330396 | 0.301017877 | 0.327 | 0.497 |
| SMIM30    | 0.000359148 | 0.261727966 | 0.211 | 0.343 |
| HYAL21    | 0.000364686 | 0.297056834 | 0.583 | 0.83  |
| MAP1LC3A  | 0.000405343 | 0.289246681 | 0.268 | 0.428 |
| TMSB4X    | 0.000433792 | 0.375712631 | 0.949 | 0.991 |
| SYF2      | 0.000452653 | 0.273078544 | 0.461 | 0.667 |
| BRD2      | 0.000462702 | 0.363327442 | 0.458 | 0.677 |
| LINC01619 | 0.000464193 | 0.297476862 | 0.31  | 0.484 |
| PFDN4     | 0.00048831  | 0.325290993 | 0.22  | 0.361 |
| NOP10     | 0.000488424 | 0.315986714 | 0.455 | 0.66  |
| LSM8      | 0.000491568 | 0.282701925 | 0.339 | 0.514 |
| KDEL2     | 0.000491643 | 0.333269113 | 0.351 | 0.544 |
| NDUFB4    | 0.000502396 | 0.322898407 | 0.461 | 0.678 |
| FKBP3     | 0.000520589 | 0.369159882 | 0.268 | 0.417 |
| GDI2      | 0.000527401 | 0.344812554 | 0.455 | 0.669 |
| FILIP1L   | 0.000529415 | 0.290007272 | 0.378 | 0.562 |
| HHEX      | 0.000532989 | 0.273379656 | 0.238 | 0.383 |
| ATP5MD    | 0.000537754 | 0.255363806 | 0.426 | 0.647 |
| MRPL41    | 0.00055379  | 0.285687214 | 0.298 | 0.46  |
| CD151     | 0.000594182 | 0.311548381 | 0.524 | 0.811 |
| SERF2     | 0.000596592 | 0.451316863 | 0.804 | 0.931 |
| COX16     | 0.000601258 | 0.300581647 | 0.342 | 0.519 |
| XRCC6     | 0.000607237 | 0.267503737 | 0.44  | 0.645 |
| ARL2      | 0.000610624 | 0.305428106 | 0.446 | 0.681 |

|         |             |             |       |       |
|---------|-------------|-------------|-------|-------|
| COX7A1  | 0.000611471 | 0.256869615 | 0.354 | 0.523 |
| HADHB   | 0.00061886  | 0.308407988 | 0.381 | 0.574 |
| GAPDH   | 0.000667723 | 0.623962032 | 0.824 | 0.931 |
| FABP4   | 0.000679309 | 0.809036489 | 0.259 | 0.191 |
| KDELRL1 | 0.000687058 | 0.289474943 | 0.464 | 0.675 |
| PSMD4   | 0.000697109 | 0.342517295 | 0.366 | 0.547 |
| ATF4    | 0.000709712 | 0.251786905 | 0.47  | 0.695 |
| FNBP1   | 0.000715613 | 0.312246907 | 0.327 | 0.53  |
| CANX    | 0.000727562 | 0.287625373 | 0.548 | 0.794 |
| TMEM123 | 0.000770948 | 0.300307976 | 0.432 | 0.687 |
| CTSL    | 0.000771566 | 0.323134029 | 0.348 | 0.537 |
| PSMA4   | 0.000800619 | 0.39179562  | 0.399 | 0.592 |
| STIP1   | 0.000816843 | 0.268231637 | 0.292 | 0.436 |
| NDUFA12 | 0.000860467 | 0.285681654 | 0.446 | 0.661 |
| CNPY2   | 0.000875593 | 0.262421464 | 0.363 | 0.524 |
| PPIA    | 0.000875793 | 0.546839957 | 0.756 | 0.912 |
| LDHB    | 0.000888964 | 0.493134    | 0.378 | 0.59  |
| REEP3   | 0.000946899 | 0.276153731 | 0.39  | 0.585 |
| MICOS13 | 0.000973813 | 0.294438625 | 0.354 | 0.529 |
| HNRNPDL | 0.000977277 | 0.294461219 | 0.542 | 0.792 |
| ARF5    | 0.000977677 | 0.259605718 | 0.256 | 0.39  |
| NACA    | 0.00105387  | 0.534779594 | 0.804 | 0.935 |
| SHC1    | 0.00107468  | 0.416651313 | 0.384 | 0.585 |
| DBN1    | 0.001138204 | 0.290011549 | 0.223 | 0.345 |
| MRPL50  | 0.001152668 | 0.263926927 | 0.161 | 0.261 |
| PSMC3   | 0.001159208 | 0.274419796 | 0.307 | 0.46  |
| NDUFAB1 | 0.001165884 | 0.294472759 | 0.375 | 0.56  |
| WDR74   | 0.001202894 | 0.261097519 | 0.208 | 0.329 |
| ARPC5   | 0.00122997  | 0.350790437 | 0.497 | 0.728 |
| S100A41 | 0.001299127 | 0.729145352 | 0.301 | 0.249 |
| H1FX    | 0.001336802 | 0.302166214 | 0.438 | 0.633 |
| TMX4    | 0.001354495 | 0.275081658 | 0.295 | 0.434 |
| VPS35   | 0.00136069  | 0.338512409 | 0.312 | 0.464 |
| ALDH2   | 0.001388027 | 0.333900087 | 0.241 | 0.376 |
| MTIF3   | 0.00138968  | 0.26020526  | 0.333 | 0.491 |
| MTCH1   | 0.001473965 | 0.269489558 | 0.432 | 0.616 |
| STK17A  | 0.001493916 | 0.270069889 | 0.271 | 0.413 |
| RNH1    | 0.001526257 | 0.294352284 | 0.423 | 0.65  |
| EEF1G   | 0.001565772 | 0.549515384 | 0.78  | 0.917 |
| COPS9   | 0.001619714 | 0.366626748 | 0.411 | 0.604 |
| NCOA4   | 0.001655259 | 0.291439284 | 0.301 | 0.445 |
| BROX    | 0.001676822 | 0.270351127 | 0.182 | 0.293 |
| NSA2    | 0.001763479 | 0.319449342 | 0.387 | 0.578 |

|         |             |             |       |       |
|---------|-------------|-------------|-------|-------|
| LAMTOR1 | 0.001772445 | 0.416666912 | 0.369 | 0.544 |
| POMP    | 0.001795217 | 0.331399266 | 0.562 | 0.778 |
| HNRNPA0 | 0.001815857 | 0.349248737 | 0.381 | 0.537 |
| CTNBL1  | 0.001883676 | 0.28166286  | 0.214 | 0.323 |
| UGP2    | 0.002000897 | 0.402834336 | 0.324 | 0.477 |
| ARF1    | 0.002009328 | 0.298113272 | 0.586 | 0.826 |
| PSMB1   | 0.002234518 | 0.301301705 | 0.506 | 0.751 |
| MAGED2  | 0.002250373 | 0.296617488 | 0.348 | 0.506 |
| PPIL4   | 0.002281199 | 0.270311809 | 0.315 | 0.465 |
| COX4I1  | 0.002284668 | 0.602841746 | 0.688 | 0.836 |
| ACYP2   | 0.002331594 | 0.267573085 | 0.256 | 0.38  |
| BEX3    | 0.002448451 | 0.491035955 | 0.366 | 0.542 |
| EIF3G   | 0.002451322 | 0.290785253 | 0.476 | 0.68  |
| NHP2    | 0.00246028  | 0.366068431 | 0.333 | 0.494 |
| BUD31   | 0.002496983 | 0.253326086 | 0.36  | 0.522 |
| LAPTM4A | 0.002535743 | 0.302198982 | 0.554 | 0.803 |
| PFN1    | 0.002541446 | 0.650226219 | 0.69  | 0.842 |
| PPHLN1  | 0.002565316 | 0.25272312  | 0.342 | 0.492 |
| DDRKG1  | 0.002570023 | 0.396244462 | 0.286 | 0.419 |
| BAX     | 0.00263695  | 0.267465249 | 0.307 | 0.458 |
| AAK1    | 0.002639118 | 0.297589729 | 0.387 | 0.574 |
| BTG3    | 0.002683768 | 0.2818782   | 0.208 | 0.322 |
| EIF3D   | 0.002865856 | 0.314919787 | 0.461 | 0.665 |
| CHMP2A  | 0.002917287 | 0.353087284 | 0.485 | 0.684 |
| CYBA    | 0.002928985 | 0.705214015 | 0.461 | 0.477 |
| VAMP5   | 0.002945169 | 0.3027136   | 0.515 | 0.713 |
| PSMB5   | 0.00298727  | 0.298632888 | 0.399 | 0.597 |
| HAX1    | 0.00300371  | 0.273799896 | 0.277 | 0.394 |
| CYB5R3  | 0.003115413 | 0.449433939 | 0.482 | 0.746 |
| EIF3L   | 0.003116895 | 0.328825126 | 0.42  | 0.619 |
| TBCB    | 0.00312206  | 0.253590769 | 0.318 | 0.473 |
| HLA-A   | 0.003197689 | 0.343566089 | 0.887 | 0.983 |
| UFC1    | 0.003290387 | 0.295189804 | 0.42  | 0.608 |
| SSB     | 0.003314462 | 0.386393605 | 0.461 | 0.657 |
| FKBP1A  | 0.003403037 | 0.275306943 | 0.732 | 0.922 |
| CIB1    | 0.003428426 | 0.255078499 | 0.327 | 0.485 |
| DDIT41  | 0.003520886 | 0.254025704 | 0.399 | 0.559 |
| PEA15   | 0.003547397 | 0.290497141 | 0.381 | 0.553 |
| CALM11  | 0.003594154 | 0.423614228 | 0.777 | 0.935 |
| NHSL1   | 0.003666874 | 0.310748709 | 0.31  | 0.453 |
| DUT     | 0.003680575 | 0.408325615 | 0.42  | 0.592 |
| SMIM26  | 0.003700283 | 0.283605439 | 0.327 | 0.469 |
| TGFB1I1 | 0.003702862 | 0.251126935 | 0.22  | 0.326 |

|          |             |             |       |       |
|----------|-------------|-------------|-------|-------|
| EIF3M    | 0.00374274  | 0.291755862 | 0.396 | 0.567 |
| NAP1L4   | 0.003820815 | 0.293878975 | 0.384 | 0.579 |
| NRP21    | 0.0038259   | 0.290861277 | 0.375 | 0.55  |
| FXYD5    | 0.003835574 | 0.416683436 | 0.551 | 0.794 |
| ATP5F1B  | 0.003876067 | 0.337994262 | 0.497 | 0.713 |
| MXRA7    | 0.003888818 | 0.311483113 | 0.387 | 0.556 |
| COX5A    | 0.003923459 | 0.277408248 | 0.443 | 0.64  |
| SRP19    | 0.003988483 | 0.289873826 | 0.342 | 0.49  |
| RHOC1    | 0.004288787 | 0.279526182 | 0.56  | 0.794 |
| TPI1     | 0.00432454  | 0.286204086 | 0.518 | 0.76  |
| COX17    | 0.004541673 | 0.377980212 | 0.393 | 0.56  |
| PHF11    | 0.004585066 | 0.317652626 | 0.229 | 0.338 |
| STOML2   | 0.004621872 | 0.282084348 | 0.244 | 0.354 |
| RRAS     | 0.004791698 | 0.294696988 | 0.31  | 0.452 |
| IFT74    | 0.004998318 | 0.267789743 | 0.164 | 0.253 |
| COMMD2   | 0.005013616 | 0.261664929 | 0.211 | 0.312 |
| RAB1B    | 0.005092912 | 0.388129058 | 0.256 | 0.377 |
| MRPL57   | 0.00530201  | 0.392104498 | 0.339 | 0.486 |
| CLNS1A   | 0.005396525 | 0.287795161 | 0.262 | 0.389 |
| ATP5PB   | 0.005525467 | 0.36804846  | 0.384 | 0.546 |
| RBM3     | 0.005595247 | 0.310432049 | 0.53  | 0.78  |
| ARL4A1   | 0.005656693 | 0.393323195 | 0.485 | 0.692 |
| SLC22A23 | 0.005715787 | 0.575300212 | 0.286 | 0.245 |
| CBX4     | 0.005806229 | 0.314556252 | 0.173 | 0.257 |
| RWDD1    | 0.005812872 | 0.343350453 | 0.429 | 0.603 |
| COMT     | 0.005819851 | 0.3563      | 0.351 | 0.52  |
| TMEM256  | 0.005958643 | 0.275559386 | 0.265 | 0.393 |
| SKP1     | 0.005965451 | 0.501532981 | 0.646 | 0.827 |
| IER5L    | 0.006046657 | 0.452483573 | 0.211 | 0.312 |
| NUCKS1   | 0.006047958 | 0.315757268 | 0.595 | 0.85  |
| EIF5A    | 0.006268152 | 0.310952851 | 0.408 | 0.579 |
| RPAIN    | 0.006291684 | 0.260269148 | 0.25  | 0.359 |
| TOPBP1   | 0.006293806 | 0.29202782  | 0.196 | 0.288 |
| ESD      | 0.006296669 | 0.304621577 | 0.33  | 0.483 |
| IFITM3   | 0.006304905 | 0.48055848  | 0.842 | 0.965 |
| MARCKS   | 0.006311817 | 0.343086962 | 0.488 | 0.725 |
| SRGN     | 0.006412807 | 0.507289019 | 0.574 | 0.878 |
| RNF7     | 0.006477828 | 0.350851381 | 0.461 | 0.635 |
| ATP5MF   | 0.006514321 | 0.262578002 | 0.39  | 0.544 |
| YWHAZ    | 0.006514614 | 0.306345285 | 0.616 | 0.857 |
| SET      | 0.006556734 | 0.265783562 | 0.586 | 0.815 |
| TM4SF181 | 0.006636275 | 0.280985895 | 0.357 | 0.522 |
| COA1     | 0.006734299 | 0.2790953   | 0.298 | 0.418 |

|          |             |             |       |       |
|----------|-------------|-------------|-------|-------|
| GIMAP7   | 0.006833638 | 0.327999018 | 0.554 | 0.767 |
| SUMO3    | 0.006904677 | 0.281201158 | 0.339 | 0.491 |
| PSMB2    | 0.006936167 | 0.315086371 | 0.375 | 0.551 |
| CARD16   | 0.00703556  | 0.330864584 | 0.333 | 0.494 |
| HMGN2    | 0.007095553 | 0.321772735 | 0.411 | 0.594 |
| COX5B    | 0.007114238 | 0.379545054 | 0.562 | 0.781 |
| BANF1    | 0.007190192 | 0.36598265  | 0.399 | 0.564 |
| HRAS     | 0.007201813 | 0.335645123 | 0.205 | 0.307 |
| SNRPB    | 0.007269876 | 0.350271311 | 0.506 | 0.706 |
| TIMP2    | 0.007312003 | 0.297117837 | 0.408 | 0.615 |
| SNRPD1   | 0.007357395 | 0.297673112 | 0.408 | 0.574 |
| SARNP    | 0.007370386 | 0.35747623  | 0.378 | 0.535 |
| ABHD3    | 0.007448629 | 0.255790824 | 0.173 | 0.254 |
| CEBPZ    | 0.007652215 | 0.282736829 | 0.351 | 0.492 |
| ITGB11   | 0.007918616 | 0.274694529 | 0.72  | 0.924 |
| MDH2     | 0.007930306 | 0.374630516 | 0.33  | 0.472 |
| PSMD7    | 0.008075543 | 0.26415851  | 0.393 | 0.551 |
| AURKAIP1 | 0.008201811 | 0.326762396 | 0.408 | 0.567 |
| DYNLT1   | 0.008219927 | 0.371101363 | 0.375 | 0.542 |
| TRIM5    | 0.008703567 | 0.568835583 | 0.182 | 0.26  |
| DMAC1    | 0.008799291 | 0.272315438 | 0.253 | 0.36  |
| KRT10    | 0.008856294 | 0.425487477 | 0.42  | 0.589 |
| ZFAND2A  | 0.009203564 | 0.360566686 | 0.223 | 0.318 |
| MRPS21   | 0.009238722 | 0.263214238 | 0.414 | 0.578 |
| CALM3    | 0.009382653 | 0.314852788 | 0.327 | 0.478 |
| TMEM230  | 0.009431669 | 0.403620892 | 0.42  | 0.597 |
| MRPS15   | 0.009617887 | 0.256596654 | 0.268 | 0.391 |
| CHCHD1   | 0.009931761 | 0.343619053 | 0.256 | 0.371 |



| p_val_adj | cluster | gene      |
|-----------|---------|-----------|
| 2.40E-180 | 0       | ACKR1     |
| 2.90E-157 | 0       | ZNF385D   |
| 7.73E-157 | 0       | TLL1      |
| 3.83E-134 | 0       | IL1R1     |
| 6.15E-130 | 0       | SELP      |
| 2.49E-114 | 0       | LRRC1     |
| 3.88E-110 | 0       | CCL14     |
| 8.75E-106 | 0       | NCOA7     |
| 3.05E-97  | 0       | EPB41L3   |
| 5.82E-92  | 0       | ADGRG6    |
| 4.33E-89  | 0       | CLU       |
| 7.73E-85  | 0       | CD74      |
| 1.03E-83  | 0       | CNKSR3    |
| 1.34E-82  | 0       | RAB3C     |
| 2.00E-81  | 0       | ELOVL7    |
| 3.21E-79  | 0       | RALGAPA2  |
| 5.34E-78  | 0       | ICAM1     |
| 6.73E-78  | 0       | TSPAN7    |
| 1.42E-77  | 0       | HIPK3     |
| 2.08E-77  | 0       | MYRIP     |
| 4.26E-77  | 0       | LIFR      |
| 8.34E-77  | 0       | CCSER1    |
| 1.93E-76  | 0       | POSTN     |
| 6.51E-76  | 0       | HLA-DQA1  |
| 1.68E-75  | 0       | SOD2      |
| 1.32E-74  | 0       | ABLIM1    |
| 1.54E-73  | 0       | ADIRF     |
| 2.61E-73  | 0       | HLA-DRA   |
| 4.01E-73  | 0       | EVA1C     |
| 1.81E-71  | 0       | OLFM1     |
| 9.29E-71  | 0       | TPD52L1   |
| 1.38E-70  | 0       | SELE      |
| 3.92E-70  | 0       | CADM3-AS1 |
| 1.23E-69  | 0       | CELF2     |
| 6.70E-68  | 0       | HLA-DRB1  |
| 8.15E-68  | 0       | NPC2      |
| 2.97E-67  | 0       | HAPLN3    |
| 3.94E-66  | 0       | TGFBR3    |
| 7.50E-66  | 0       | DAPK1     |
| 8.09E-66  | 0       | HDAC9     |
| 2.97E-65  | 0       | NNMT      |

|          |   |            |
|----------|---|------------|
| 3.90E-65 | 0 | DAAM1      |
| 2.22E-61 | 0 | TFPI       |
| 3.22E-60 | 0 | NAMPT      |
| 5.72E-59 | 0 | IL33       |
| 8.27E-58 | 0 | CCL23      |
| 8.30E-58 | 0 | HLA-DPB1   |
| 1.35E-57 | 0 | SIK2       |
| 2.55E-57 | 0 | SNTG2      |
| 4.76E-57 | 0 | HLA-DQA2   |
| 3.90E-56 | 0 | HLA-DQB1   |
| 5.05E-56 | 0 | HLA-DPA1   |
| 2.74E-54 | 0 | CYTH1      |
| 1.93E-53 | 0 | KLF7       |
| 1.96E-53 | 0 | AL078604.4 |
| 1.25E-52 | 0 | IL6        |
| 2.13E-51 | 0 | CPXM2      |
| 9.59E-51 | 0 | MRTFB      |
| 5.98E-50 | 0 | BNC2       |
| 1.70E-49 | 0 | PLEKHA7    |
| 6.80E-49 | 0 | VWF        |
| 1.73E-48 | 0 | C1QTNF1    |
| 2.44E-48 | 0 | ARHGAP26   |
| 3.71E-47 | 0 | MYOF       |
| 1.13E-46 | 0 | MCTP1      |
| 2.43E-46 | 0 | UGCG       |
| 5.86E-46 | 0 | DNM3       |
| 6.42E-46 | 0 | YBX3       |
| 9.48E-46 | 0 | PERP       |
| 2.06E-44 | 0 | SAMD4A     |
| 3.55E-44 | 0 | DOC2B      |
| 3.60E-44 | 0 | TESC       |
| 1.63E-43 | 0 | FOXP1      |
| 5.00E-43 | 0 | SDCBP      |
| 1.31E-42 | 0 | DUSP23     |
| 1.56E-42 | 0 | ACTN1      |
| 4.01E-42 | 0 | PDIA5      |
| 6.51E-42 | 0 | SERPINA3   |
| 7.30E-42 | 0 | TPO        |
| 9.51E-42 | 0 | TACR1      |
| 9.60E-42 | 0 | ITPKC      |
| 1.08E-41 | 0 | PRXL2A     |
| 1.95E-41 | 0 | PLSCR4     |
| 8.13E-41 | 0 | NPAS3      |

|          |   |            |
|----------|---|------------|
| 5.09E-40 | 0 | CTSC       |
| 5.56E-40 | 0 | VCAM1      |
| 5.63E-40 | 0 | C7         |
| 1.68E-39 | 0 | FBLN2      |
| 1.84E-39 | 0 | BIRC3      |
| 2.85E-39 | 0 | C2CD4B     |
| 3.31E-39 | 0 | SH3BP5     |
| 1.01E-38 | 0 | CSF3       |
| 1.12E-38 | 0 | TGFBR2     |
| 1.22E-38 | 0 | RAB27A     |
| 1.59E-38 | 0 | CST3       |
| 6.28E-38 | 0 | PLCB4      |
| 6.63E-38 | 0 | HLA-DMA    |
| 1.43E-37 | 0 | MEOX2      |
| 2.47E-37 | 0 | SLC8A1     |
| 5.64E-37 | 0 | MYCBP2     |
| 7.02E-37 | 0 | PVT1       |
| 1.27E-36 | 0 | CPVL       |
| 1.45E-36 | 0 | SPARCL1    |
| 5.45E-36 | 0 | HLA-DOA    |
| 7.95E-36 | 0 | ZBTB20     |
| 1.19E-35 | 0 | FNIP2      |
| 2.14E-35 | 0 | AL589693.1 |
| 3.32E-35 | 0 | ADAMTS9    |
| 3.89E-35 | 0 | CARMIL1    |
| 4.75E-35 | 0 | LRATD2     |
| 1.07E-34 | 0 | ST6GAL1    |
| 1.76E-34 | 0 | PDLIM1     |
| 6.27E-34 | 0 | CSF2RB     |
| 8.09E-34 | 0 | CNTNAP3B   |
| 9.79E-34 | 0 | CPE        |
| 1.18E-33 | 0 | LYST       |
| 1.29E-33 | 0 | LINC02147  |
| 1.57E-33 | 0 | PCDH19     |
| 1.63E-33 | 0 | SNAP25     |
| 2.83E-33 | 0 | KCTD12     |
| 2.90E-33 | 0 | AF064858.1 |
| 2.97E-33 | 0 | ARNTL2     |
| 3.28E-33 | 0 | CCDC68     |
| 4.50E-33 | 0 | TNFRSF10B  |
| 8.89E-33 | 0 | SPATA6L    |
| 2.03E-32 | 0 | SNCG       |
| 3.26E-32 | 0 | SESN3      |

|          |   |           |
|----------|---|-----------|
| 1.09E-31 | 0 | NR2F2     |
| 3.33E-31 | 0 | SSH1      |
| 4.83E-31 | 0 | CCDC69    |
| 5.00E-31 | 0 | MAP3K8    |
| 1.36E-30 | 0 | SLC1A1    |
| 1.92E-30 | 0 | RORA      |
| 2.75E-30 | 0 | MECOM     |
| 3.63E-30 | 0 | PDK4      |
| 6.38E-30 | 0 | SLC4A7    |
| 1.04E-29 | 0 | FAM155A   |
| 1.76E-29 | 0 | SAMD5     |
| 2.06E-29 | 0 | DOCK11    |
| 3.72E-29 | 0 | ADAM23    |
| 3.99E-29 | 0 | CLEC1A    |
| 4.19E-29 | 0 | SETBP1    |
| 4.28E-29 | 0 | CORO2A    |
| 7.38E-29 | 0 | IER3      |
| 1.23E-28 | 0 | SRSF4     |
| 1.33E-28 | 0 | NR2F2-AS1 |
| 1.40E-28 | 0 | PIM3      |
| 1.40E-28 | 0 | RBP5      |
| 2.21E-28 | 0 | ZFPM2     |
| 2.91E-28 | 0 | PLSCR1    |
| 3.71E-28 | 0 | HLA-DRB5  |
| 4.23E-28 | 0 | ZFAND5    |
| 5.34E-28 | 0 | CYP1B1    |
| 5.58E-28 | 0 | TNFAIP3   |
| 6.32E-28 | 0 | TMTC1     |
| 7.59E-28 | 0 | SYT15     |
| 9.78E-28 | 0 | IRAK3     |
| 9.81E-28 | 0 | CDC42EP3  |
| 1.48E-27 | 0 | C21orf91  |
| 2.41E-27 | 0 | LINC-PINT |
| 3.08E-27 | 0 | PBX1      |
| 3.68E-27 | 0 | WTAP      |
| 3.74E-27 | 0 | PCAT1     |
| 6.02E-27 | 0 | TMTC2     |
| 1.02E-26 | 0 | LHFPL2    |
| 1.22E-26 | 0 | CA8       |
| 1.46E-26 | 0 | CRIM1     |
| 1.99E-26 | 0 | SHB       |
| 2.54E-26 | 0 | GAS5      |
| 2.96E-26 | 0 | NFKBIZ    |

|          |   |             |
|----------|---|-------------|
| 5.21E-26 | 0 | PHLDA1      |
| 5.66E-26 | 0 | TPK1        |
| 7.35E-26 | 0 | HIVEP1      |
| 1.07E-25 | 0 | PTAFR       |
| 1.61E-25 | 0 | SGMS2       |
| 2.02E-25 | 0 | SH3BGRL2    |
| 2.08E-25 | 0 | MBNL1       |
| 3.55E-25 | 0 | AC011511.2  |
| 4.15E-25 | 0 | FRY         |
| 5.22E-25 | 0 | PRCP        |
| 5.95E-25 | 0 | SERPINB1    |
| 7.21E-25 | 0 | SYNE2       |
| 7.90E-25 | 0 | PKP4        |
| 1.03E-24 | 0 | MEOX1       |
| 1.52E-24 | 0 | ATP8B1      |
| 2.72E-24 | 0 | CFB         |
| 4.98E-24 | 0 | RFX2        |
| 5.98E-24 | 0 | GATA6       |
| 6.37E-24 | 0 | ZNF608      |
| 1.01E-23 | 0 | MMP16       |
| 1.49E-23 | 0 | IGFBP4      |
| 1.63E-23 | 0 | SOCS2       |
| 2.15E-23 | 0 | ASPH        |
| 2.62E-23 | 0 | DENND4A     |
| 3.49E-23 | 0 | LHX6        |
| 5.01E-23 | 0 | ADAMTS9-AS1 |
| 5.20E-23 | 0 | CYGB        |
| 6.93E-23 | 0 | LRIG3       |
| 8.28E-23 | 0 | NOP53       |
| 1.08E-22 | 0 | TMEM273     |
| 1.36E-22 | 0 | RND1        |
| 1.51E-22 | 0 | SPTLC2      |
| 1.79E-22 | 0 | LPCAT4      |
| 2.27E-22 | 0 | GMDS        |
| 2.38E-22 | 0 | MKLN1       |
| 2.73E-22 | 0 | ETS2        |
| 3.10E-22 | 0 | FOXO1       |
| 4.85E-22 | 0 | AKAP12      |
| 6.67E-22 | 0 | CSRP2       |
| 7.43E-22 | 0 | AASS        |
| 7.68E-22 | 0 | CTNNAL1     |
| 7.73E-22 | 0 | CCNL1       |
| 1.27E-21 | 0 | FRMD3       |

|          |   |            |
|----------|---|------------|
| 1.46E-21 | 0 | IGF2BP2    |
| 1.53E-21 | 0 | IL6ST      |
| 1.60E-21 | 0 | AC016831.7 |
| 1.90E-21 | 0 | KLF9       |
| 5.39E-21 | 0 | NFKB1      |
| 5.60E-21 | 0 | MET        |
| 5.82E-21 | 0 | GNG12      |
| 5.87E-21 | 0 | RELL1      |
| 7.07E-21 | 0 | SH3RF3     |
| 9.95E-21 | 0 | PPP3CA     |
| 1.06E-20 | 0 | IPCEF1     |
| 1.10E-20 | 0 | SASH1      |
| 1.28E-20 | 0 | LHFPL6     |
| 1.37E-20 | 0 | BACE2      |
| 1.49E-20 | 0 | GNA14      |
| 1.60E-20 | 0 | GNB4       |
| 1.71E-20 | 0 | EXOC6      |
| 2.12E-20 | 0 | FOXC1      |
| 2.21E-20 | 0 | RHOU       |
| 2.24E-20 | 0 | DNMBP      |
| 3.25E-20 | 0 | FAM241A    |
| 3.79E-20 | 0 | NOCT       |
| 4.26E-20 | 0 | ANO2       |
| 4.75E-20 | 0 | SYBU       |
| 5.05E-20 | 0 | RELB       |
| 8.27E-20 | 0 | BMERB1     |
| 8.53E-20 | 0 | VCAN       |
| 8.66E-20 | 0 | JAM2       |
| 1.09E-19 | 0 | SLC16A7    |
| 1.34E-19 | 0 | ADGRL4     |
| 1.69E-19 | 0 | ENPP2      |
| 2.11E-19 | 0 | SGMS1      |
| 2.23E-19 | 0 | SPHK1      |
| 2.81E-19 | 0 | TSHZ2      |
| 3.85E-19 | 0 | IL15       |
| 4.19E-19 | 0 | HDGFL3     |
| 4.35E-19 | 0 | IRF1       |
| 5.00E-19 | 0 | AL033504.1 |
| 5.29E-19 | 0 | ABLIM3     |
| 5.71E-19 | 0 | B4GALT5    |
| 6.76E-19 | 0 | RAP1B      |
| 7.25E-19 | 0 | OSBPL10    |
| 9.33E-19 | 0 | HLA-DMB    |

|          |   |             |
|----------|---|-------------|
| 1.07E-18 | 0 | NRN1        |
| 1.08E-18 | 0 | ZFP36L1     |
| 1.26E-18 | 0 | PLA1A       |
| 2.04E-18 | 0 | TRPM6       |
| 2.10E-18 | 0 | OSMR        |
| 2.37E-18 | 0 | DOCK4       |
| 2.52E-18 | 0 | CEMIP2      |
| 2.58E-18 | 0 | NEURL1B     |
| 3.23E-18 | 0 | ICAM4       |
| 3.34E-18 | 0 | TEAD1       |
| 5.62E-18 | 0 | FKBP5       |
| 6.37E-18 | 0 | ATP11C      |
| 8.03E-18 | 0 | CFLAR       |
| 9.08E-18 | 0 | SLC7A1      |
| 1.06E-17 | 0 | ABCG2       |
| 1.41E-17 | 0 | PELI2       |
| 1.47E-17 | 0 | NFATC2      |
| 1.69E-17 | 0 | SEMA6A      |
| 1.70E-17 | 0 | MCUB        |
| 1.82E-17 | 0 | CPD         |
| 2.17E-17 | 0 | LITAF       |
| 2.19E-17 | 0 | PLXDC2      |
| 2.71E-17 | 0 | LINC01197   |
| 3.20E-17 | 0 | PALM2-AKAP2 |
| 3.49E-17 | 0 | CLDN5       |
| 3.81E-17 | 0 | SNCA        |
| 4.69E-17 | 0 | ADM5        |
| 4.69E-17 | 0 | MIR99AHG    |
| 5.46E-17 | 0 | ARAP2       |
| 5.73E-17 | 0 | USP36       |
| 6.05E-17 | 0 | BMPR2       |
| 7.13E-17 | 0 | ITSN1       |
| 8.87E-17 | 0 | IL4R        |
| 9.35E-17 | 0 | CMIP        |
| 9.85E-17 | 0 | ZC3H12A     |
| 1.07E-16 | 0 | TNFRSF10D   |
| 1.15E-16 | 0 | GNS         |
| 1.24E-16 | 0 | TNFRSF1A    |
| 1.52E-16 | 0 | DIXDC1      |
| 1.59E-16 | 0 | PEAK1       |
| 1.90E-16 | 0 | PABPC1      |
| 1.92E-16 | 0 | BAZ1A       |
| 2.36E-16 | 0 | TNFRSF6B    |

|          |   |            |
|----------|---|------------|
| 2.42E-16 | 0 | RNF122     |
| 3.41E-16 | 0 | CLIP1      |
| 3.56E-16 | 0 | MED13L     |
| 3.59E-16 | 0 | AP002518.2 |
| 3.71E-16 | 0 | SMAD3      |
| 4.09E-16 | 0 | ZNRF1      |
| 5.44E-16 | 0 | TMEM54     |
| 5.73E-16 | 0 | EPS8       |
| 6.14E-16 | 0 | ERRFI1     |
| 8.99E-16 | 0 | CSRNP1     |
| 9.71E-16 | 0 | SLCO3A1    |
| 1.11E-15 | 0 | HIVEP2     |
| 1.20E-15 | 0 | AKT3       |
| 1.20E-15 | 0 | SLC1A5     |
| 1.23E-15 | 0 | TPT1       |
| 1.71E-15 | 0 | LY6E       |
| 2.01E-15 | 0 | ESYT2      |
| 2.30E-15 | 0 | SNHG29     |
| 2.31E-15 | 0 | TEX14      |
| 2.67E-15 | 0 | PARD3      |
| 2.79E-15 | 0 | ARL4A      |
| 3.26E-15 | 0 | KLHL3      |
| 3.66E-15 | 0 | LDLRAD4    |
| 4.17E-15 | 0 | AL133268.4 |
| 4.50E-15 | 0 | MID1       |
| 4.83E-15 | 0 | EBF1       |
| 4.92E-15 | 0 | PTGDS      |
| 5.84E-15 | 0 | ABCA5      |
| 5.88E-15 | 0 | KLF4       |
| 7.19E-15 | 0 | PITPNC1    |
| 7.24E-15 | 0 | ANKRD12    |
| 1.09E-14 | 0 | CYTL1      |
| 1.28E-14 | 0 | ANKRD29    |
| 1.48E-14 | 0 | ZBTB16     |
| 2.11E-14 | 0 | SAV1       |
| 2.23E-14 | 0 | SEMA6D     |
| 2.68E-14 | 0 | TYMP       |
| 3.27E-14 | 0 | AC007681.1 |
| 3.86E-14 | 0 | AC016831.5 |
| 5.50E-14 | 0 | 3-Mar      |
| 5.53E-14 | 0 | RALGDS     |
| 6.95E-14 | 0 | ITGB4      |
| 8.85E-14 | 0 | EGLN3      |



|          |   |            |
|----------|---|------------|
| 9.35E-14 | 0 | ROBO1      |
| 1.12E-13 | 0 | CXCL2      |
| 1.25E-13 | 0 | HINT3      |
| 1.43E-13 | 0 | CCL2       |
| 1.46E-13 | 0 | PMP22      |
| 1.65E-13 | 0 | NOSTRIN    |
| 1.72E-13 | 0 | NR3C2      |
| 1.97E-13 | 0 | NDRG1      |
| 2.21E-13 | 0 | AHNAK      |
| 2.29E-13 | 0 | SERTAD2    |
| 2.37E-13 | 0 | FGD4       |
| 2.64E-13 | 0 | MMP28      |
| 2.79E-13 | 0 | NSUN6      |
| 3.25E-13 | 0 | CNTNAP3    |
| 3.64E-13 | 0 | AHR        |
| 5.46E-13 | 0 | HNRNPC     |
| 5.57E-13 | 0 | CHN1       |
| 6.06E-13 | 0 | ZNF267     |
| 6.20E-13 | 0 | MAP3K13    |
| 6.37E-13 | 0 | AL049629.1 |
| 6.49E-13 | 0 | KIAA0040   |
| 6.92E-13 | 0 | FKBP11     |
| 8.41E-13 | 0 | PLOD2      |
| 9.40E-13 | 0 | SSBP2      |
| 1.46E-12 | 0 | MAN1A1     |
| 1.60E-12 | 0 | EPB41L4A   |
| 2.07E-12 | 0 | CBLB       |
| 2.71E-12 | 0 | LAMA3      |
| 2.93E-12 | 0 | DLG2       |
| 3.07E-12 | 0 | NFKB2      |
| 3.72E-12 | 0 | AC105450.1 |
| 4.06E-12 | 0 | MAOA       |
| 4.09E-12 | 0 | PREX2      |
| 4.59E-12 | 0 | AQP1       |
| 7.94E-12 | 0 | NFAT5      |
| 9.21E-12 | 0 | LYRM1      |
| 9.25E-12 | 0 | NFE2L1     |
| 9.28E-12 | 0 | PRKAG2     |
| 9.46E-12 | 0 | LINC00513  |
| 1.00E-11 | 0 | LDHA       |
| 1.36E-11 | 0 | SLC9B2     |
| 1.39E-11 | 0 | ARRDC3     |
| 1.92E-11 | 0 | SAMHD1     |

|          |   |             |
|----------|---|-------------|
| 1.93E-11 | 0 | REV3L       |
| 2.30E-11 | 0 | OVCH1       |
| 3.37E-11 | 0 | SAMD12      |
| 3.66E-11 | 0 | PITPNB      |
| 4.25E-11 | 0 | INPP1       |
| 4.28E-11 | 0 | NASP        |
| 4.32E-11 | 0 | TRIB1       |
| 4.55E-11 | 0 | BRAF        |
| 5.94E-11 | 0 | UBE2E2      |
| 6.20E-11 | 0 | ATF6        |
| 6.59E-11 | 0 | NAV3        |
| 7.62E-11 | 0 | BCR         |
| 8.60E-11 | 0 | SIK3        |
| 8.93E-11 | 0 | PDLIM3      |
| 9.57E-11 | 0 | ETV6        |
| 9.72E-11 | 0 | RAB11A      |
| 1.07E-10 | 0 | THUMPD3-AS1 |
| 1.32E-10 | 0 | GNAQ        |
| 1.35E-10 | 0 | WWP1        |
| 1.41E-10 | 0 | SRSF5       |
| 1.64E-10 | 0 | CPNE8       |
| 1.79E-10 | 0 | EEF1B2      |
| 2.28E-10 | 0 | LINC01473   |
| 3.49E-10 | 0 | RAI14       |
| 3.65E-10 | 0 | SPAG9       |
| 4.00E-10 | 0 | DDX58       |
| 4.34E-10 | 0 | AL109930.1  |
| 5.70E-10 | 0 | CYSTM1      |
| 7.45E-10 | 0 | REL         |
| 8.60E-10 | 0 | TACC1       |
| 9.90E-10 | 0 | SPDYA       |
| 1.01E-09 | 0 | IL3RA       |
| 1.10E-09 | 0 | ACER2       |
| 1.18E-09 | 0 | SEMA4A      |
| 1.47E-09 | 0 | KDM6B       |
| 1.51E-09 | 0 | USP53       |
| 1.78E-09 | 0 | PDLIM5      |
| 1.83E-09 | 0 | LRP5        |
| 2.15E-09 | 0 | SHROOM2     |
| 2.96E-09 | 0 | NKTR        |
| 3.22E-09 | 0 | CSF1        |
| 3.82E-09 | 0 | CASZ1       |
| 4.07E-09 | 0 | FRMD4A      |

|          |   |             |
|----------|---|-------------|
| 4.24E-09 | 0 | STEAP1B     |
| 4.51E-09 | 0 | ZNF521      |
| 4.98E-09 | 0 | SLCO2A1     |
| 5.21E-09 | 0 | AHI1        |
| 5.24E-09 | 0 | DIPK2B      |
| 7.39E-09 | 0 | SNTB2       |
| 7.55E-09 | 0 | MIR222HG    |
| 8.55E-09 | 0 | FBN1        |
| 8.65E-09 | 0 | AL365295.1  |
| 9.58E-09 | 0 | RAPH1       |
| 1.03E-08 | 0 | CD55        |
| 1.09E-08 | 0 | GNA14-AS1   |
| 1.14E-08 | 0 | KLHL2       |
| 1.17E-08 | 0 | ZNF423      |
| 1.21E-08 | 0 | ADAMTS9-AS2 |
| 1.26E-08 | 0 | MFHAS1      |
| 1.44E-08 | 0 | CORO1C      |
| 1.50E-08 | 0 | MIR22HG     |
| 1.65E-08 | 0 | ACACB       |
| 2.09E-08 | 0 | PTPN1       |
| 2.27E-08 | 0 | STOX2       |
| 2.59E-08 | 0 | ACKR3       |
| 2.71E-08 | 0 | RASA4       |
| 3.54E-08 | 0 | ARHGEF3     |
| 3.64E-08 | 0 | FTX         |
| 3.70E-08 | 0 | DISC1FP1    |
| 4.25E-08 | 0 | TBC1D4      |
| 6.27E-08 | 0 | RFX3        |
| 6.81E-08 | 0 | LRMDA       |
| 7.17E-08 | 0 | TRMT11      |
| 7.22E-08 | 0 | NFIA        |
| 7.29E-08 | 0 | SLC25A29    |
| 8.28E-08 | 0 | IMMP2L      |
| 8.90E-08 | 0 | HIF1A       |
| 1.11E-07 | 0 | RNF115      |
| 1.48E-07 | 0 | GALNT15     |
| 1.63E-07 | 0 | GLIS3       |
| 2.19E-07 | 0 | ZHX2        |
| 2.71E-07 | 0 | AFAP1L2     |
| 2.78E-07 | 0 | ERG         |
| 3.29E-07 | 0 | RAB8B       |
| 3.39E-07 | 0 | SVIL        |
| 3.43E-07 | 0 | IRAK2       |

|             |   |            |
|-------------|---|------------|
| 3.98E-07    | 0 | ASAP1      |
| 4.72E-07    | 0 | HRH1       |
| 6.08E-07    | 0 | NUP210L    |
| 7.20E-07    | 0 | ARID5B     |
| 1.18E-06    | 0 | RNF217     |
| 1.49E-06    | 0 | FBXL2      |
| 2.18E-06    | 0 | TAF4B      |
| 2.29E-06    | 0 | CHIC2      |
| 2.31E-06    | 0 | CDKN1A     |
| 2.93E-06    | 0 | GALNT10    |
| 3.10E-06    | 0 | PDE7B      |
| 4.34E-06    | 0 | FOXO3      |
| 4.55E-06    | 0 | ERI2       |
| 4.95E-06    | 0 | AC008014.1 |
| 7.61E-06    | 0 | ATG7       |
| 1.29E-05    | 0 | SUSD6      |
| 1.32E-05    | 0 | PRKN       |
| 1.89E-05    | 0 | PPP3R1     |
| 1.96E-05    | 0 | MBNL2      |
| 1.99E-05    | 0 | LRRC49     |
| 2.26E-05    | 0 | WBP1L      |
| 2.46E-05    | 0 | CUL1       |
| 2.54E-05    | 0 | MYO9A      |
| 2.64E-05    | 0 | HLA-E      |
| 2.65E-05    | 0 | SNAPC1     |
| 2.85E-05    | 0 | YPEL2      |
| 2.87E-05    | 0 | EGLN1      |
| 3.70E-05    | 0 | TRIM69     |
| 3.77E-05    | 0 | INPP4B     |
| 4.05E-05    | 0 | ZC3HAV1    |
| 4.32E-05    | 0 | FAM171A1   |
| 5.36E-05    | 0 | SSBP3      |
| 6.29E-05    | 0 | LDLRAD3    |
| 7.40E-05    | 0 | PPP2R3A    |
| 8.11E-05    | 0 | ATP2B1     |
| 8.33E-05    | 0 | FBXO31     |
| 9.34E-05    | 0 | JAK2       |
| 9.67E-05    | 0 | MB21D2     |
| 0.000120925 | 0 | BTBD7      |
| 0.000123388 | 0 | SPIDR      |
| 0.000157697 | 0 | RCAN1      |
| 0.000157987 | 0 | PTPRM      |
| 0.000169419 | 0 | NAALADL2   |

|             |   |            |
|-------------|---|------------|
| 0.000226484 | 0 | FBXO11     |
| 0.000359343 | 0 | PCED1B     |
| 0.000390075 | 0 | SH3RF1     |
| 0.000419615 | 0 | LINC01515  |
| 0.000423825 | 0 | SQSTM1     |
| 0.00064573  | 0 | DUSP1      |
| 0.000745616 | 0 | TXNIP      |
| 0.000793723 | 0 | NXN        |
| 0.001046285 | 0 | MTHFD1L    |
| 0.001072451 | 0 | ALPK1      |
| 0.001136129 | 0 | KANSL1L    |
| 0.001459018 | 0 | LINC01117  |
| 0.001714694 | 0 | NFE2L3     |
| 0.002256968 | 0 | SLC30A7    |
| 0.002745409 | 0 | WNT2B      |
| 0.002983437 | 0 | TTY14      |
| 0.00327438  | 0 | MRNIP      |
| 0.003299859 | 0 | GMDS-DT    |
| 0.003957318 | 0 | FER        |
| 0.004279301 | 0 | LARP4B     |
| 0.005421888 | 0 | MAPK8      |
| 0.010545795 | 0 | SNED1      |
| 0.013079401 | 0 | BIN3       |
| 0.013770257 | 0 | CCNH       |
| 0.01706619  | 0 | MOB3B      |
| 0.01793422  | 0 | NTN4       |
| 0.05198698  | 0 | LINC01876  |
| 0.05722871  | 0 | RFX3-AS1   |
| 0.090054432 | 0 | RAPGEF5    |
| 0.262898055 | 0 | AHCYL2     |
| 0.759951983 | 0 | MEF2C-AS1  |
| 1           | 0 | PHLDB2     |
| 1           | 0 | INTS6      |
| 1           | 0 | C11orf96   |
| 1           | 0 | AC018816.1 |
| 1           | 0 | ADAMTS4    |
| 1           | 0 | FMNL2      |
| 2.78E-110   | 1 | PTPRG      |
| 7.48E-110   | 1 | ARL15      |
| 6.24E-71    | 1 | CXCL12     |
| 8.27E-70    | 1 | INSR       |
| 2.19E-69    | 1 | ADAMTS6    |
| 2.09E-67    | 1 | FLT1       |

|          |   |             |
|----------|---|-------------|
| 5.22E-66 | 1 | ADAMTSL2    |
| 2.19E-65 | 1 | JAG2        |
| 2.80E-65 | 1 | MEF2A       |
| 5.11E-65 | 1 | RASGRF2     |
| 1.21E-64 | 1 | BTNL9       |
| 6.14E-64 | 1 | MPPED2      |
| 1.19E-63 | 1 | MIR181A1HG  |
| 6.05E-61 | 1 | SYNPO       |
| 1.21E-60 | 1 | MLEC        |
| 2.38E-58 | 1 | A2M         |
| 1.07E-57 | 1 | NES         |
| 3.49E-57 | 1 | RAPGEF1     |
| 4.98E-57 | 1 | COL4A2      |
| 4.22E-55 | 1 | IGFBP3      |
| 4.94E-54 | 1 | HEY1        |
| 1.00E-53 | 1 | MMP2        |
| 1.74E-51 | 1 | DOCK6       |
| 2.82E-51 | 1 | CTNNB1      |
| 4.48E-51 | 1 | SPARC       |
| 5.06E-51 | 1 | CACNA1C     |
| 3.36E-50 | 1 | RAPGEF2     |
| 1.95E-48 | 1 | ACE         |
| 4.90E-48 | 1 | DYSF        |
| 1.33E-47 | 1 | SGK1        |
| 6.69E-47 | 1 | GRB10       |
| 1.68E-46 | 1 | CDH13       |
| 7.00E-46 | 1 | CPNE5       |
| 1.02E-45 | 1 | PLPP1       |
| 1.08E-45 | 1 | ITGA8       |
| 5.54E-45 | 1 | EDIL3       |
| 9.47E-45 | 1 | NCALD       |
| 2.50E-44 | 1 | FMNL3       |
| 1.44E-43 | 1 | MIR4435-2HG |
| 8.89E-43 | 1 | AKAP13      |
| 9.39E-43 | 1 | ESAM        |
| 5.32E-42 | 1 | CLIC5       |
| 5.54E-42 | 1 | MYO1B       |
| 8.14E-42 | 1 | PDGFD       |
| 1.21E-41 | 1 | GJA4        |
| 1.59E-41 | 1 | PLXNA2      |
| 2.41E-41 | 1 | EXOC3L1     |
| 5.69E-41 | 1 | PLXND1      |
| 1.56E-40 | 1 | PCDH12      |

|          |   |            |
|----------|---|------------|
| 3.35E-40 | 1 | KCNQ1      |
| 6.18E-40 | 1 | PTP4A3     |
| 7.14E-40 | 1 | ARHGAP29   |
| 9.84E-40 | 1 | NAV1       |
| 1.21E-39 | 1 | GSN        |
| 1.33E-39 | 1 | HEG1       |
| 3.27E-39 | 1 | MAP1B      |
| 3.30E-39 | 1 | LAMB1      |
| 3.43E-39 | 1 | COL13A1    |
| 4.13E-39 | 1 | RASGRP3    |
| 5.39E-39 | 1 | ADARB1     |
| 1.36E-38 | 1 | DLL4       |
| 1.44E-38 | 1 | FAP        |
| 2.47E-38 | 1 | APP        |
| 4.44E-38 | 1 | ITGA1      |
| 4.45E-38 | 1 | EML1       |
| 1.26E-37 | 1 | EFNB1      |
| 2.70E-37 | 1 | CAVIN3     |
| 3.53E-37 | 1 | CDH5       |
| 6.29E-37 | 1 | SOX5       |
| 6.43E-37 | 1 | TCF12      |
| 1.02E-36 | 1 | ETS1       |
| 1.21E-36 | 1 | CDYL2      |
| 2.42E-36 | 1 | VWA1       |
| 2.49E-36 | 1 | KCNN3      |
| 4.60E-36 | 1 | DHRS3      |
| 4.91E-36 | 1 | AC119674.1 |
| 1.63E-35 | 1 | PCDH17     |
| 2.26E-35 | 1 | PTK2       |
| 1.04E-34 | 1 | PLCL2      |
| 1.47E-34 | 1 | TMEM204    |
| 1.66E-34 | 1 | ASAP2      |
| 2.25E-34 | 1 | CCDC3      |
| 2.33E-34 | 1 | MAML3      |
| 2.58E-34 | 1 | RGS3       |
| 7.01E-34 | 1 | EXOC3L2    |
| 1.76E-33 | 1 | BGN        |
| 1.77E-33 | 1 | RFLNB      |
| 2.11E-33 | 1 | CD276      |
| 2.49E-33 | 1 | UNC5B      |
| 4.36E-33 | 1 | SEMA3F     |
| 4.40E-33 | 1 | JUP        |
| 7.68E-33 | 1 | SEC14L1    |

|          |   |            |
|----------|---|------------|
| 8.30E-33 | 1 | PLVAP      |
| 1.23E-32 | 1 | PLCL1      |
| 1.44E-32 | 1 | KLHL5      |
| 1.48E-32 | 1 | MYO1D      |
| 1.91E-32 | 1 | SPRY4      |
| 2.46E-32 | 1 | VASH1      |
| 4.46E-32 | 1 | RIN3       |
| 4.91E-32 | 1 | JCAD       |
| 1.06E-31 | 1 | MCF2L      |
| 1.11E-31 | 1 | TIE1       |
| 1.18E-31 | 1 | APCDD1     |
| 1.19E-31 | 1 | SLC6A6     |
| 6.46E-31 | 1 | NRCAM      |
| 7.36E-31 | 1 | DENND11    |
| 1.13E-30 | 1 | ALPK3      |
| 3.00E-30 | 1 | ALPL       |
| 4.08E-30 | 1 | ITGB1      |
| 5.21E-30 | 1 | TBC1D1     |
| 5.36E-30 | 1 | ZFH3       |
| 1.92E-29 | 1 | PTPN14     |
| 1.92E-29 | 1 | ITIH5      |
| 1.95E-29 | 1 | TNK2       |
| 3.15E-29 | 1 | PDGFB      |
| 3.32E-29 | 1 | SFMBT2     |
| 5.17E-29 | 1 | RIN2       |
| 1.25E-28 | 1 | UACA       |
| 1.29E-28 | 1 | HERC1      |
| 1.29E-28 | 1 | AC002070.1 |
| 2.77E-28 | 1 | SERPINH1   |
| 3.69E-28 | 1 | AC008050.1 |
| 4.09E-28 | 1 | GPR4       |
| 4.12E-28 | 1 | TSC22D1    |
| 6.39E-28 | 1 | PLOD1      |
| 1.51E-27 | 1 | FCHSD2     |
| 1.94E-27 | 1 | AFAP1L1    |
| 3.10E-27 | 1 | FGF12      |
| 4.81E-27 | 1 | SOX18      |
| 8.06E-27 | 1 | ARHGAP4    |
| 1.34E-26 | 1 | MYO6       |
| 1.75E-26 | 1 | ICAM2      |
| 2.36E-26 | 1 | ANGPTL2    |
| 2.46E-26 | 1 | LPCAT2     |
| 3.47E-26 | 1 | ENG        |



|          |   |            |
|----------|---|------------|
| 4.09E-26 | 1 | AIF1L      |
| 7.38E-26 | 1 | RDX        |
| 7.58E-26 | 1 | ZNF366     |
| 1.90E-25 | 1 | ITPRIP     |
| 2.24E-25 | 1 | FBLIM1     |
| 2.76E-25 | 1 | ITGA9      |
| 4.34E-25 | 1 | PINK1      |
| 5.69E-25 | 1 | TMEM184B   |
| 7.43E-25 | 1 | ST6GALNAC3 |
| 8.14E-25 | 1 | PCSK5      |
| 8.54E-25 | 1 | TTC28      |
| 1.16E-24 | 1 | TMEM233    |
| 1.65E-24 | 1 | ACTN4      |
| 1.79E-24 | 1 | SMAD6      |
| 2.49E-24 | 1 | CCND1      |
| 2.52E-24 | 1 | PMEPA1     |
| 2.76E-24 | 1 | PHACTR1    |
| 2.94E-24 | 1 | FYN        |
| 3.09E-24 | 1 | PTPRK      |
| 5.85E-24 | 1 | DGKD       |
| 7.58E-24 | 1 | ACOT7      |
| 8.83E-24 | 1 | SLC12A2    |
| 9.68E-24 | 1 | CRIP2      |
| 1.33E-23 | 1 | LAMA4      |
| 1.49E-23 | 1 | ARHGEF12   |
| 1.51E-23 | 1 | C1orf54    |
| 1.52E-23 | 1 | CD46       |
| 2.20E-23 | 1 | KIAA0355   |
| 3.33E-23 | 1 | COLGALT1   |
| 4.06E-23 | 1 | TMC7       |
| 5.39E-23 | 1 | IQSEC1     |
| 7.36E-23 | 1 | EFNB2      |
| 8.52E-23 | 1 | HTRA1      |
| 8.91E-23 | 1 | DGKH       |
| 9.08E-23 | 1 | PDE10A     |
| 9.66E-23 | 1 | YWHAH      |
| 1.13E-22 | 1 | STT3B      |
| 1.58E-22 | 1 | PHLDB1     |
| 2.00E-22 | 1 | WDFY3      |
| 2.40E-22 | 1 | APBB2      |
| 2.89E-22 | 1 | ITSN2      |
| 3.56E-22 | 1 | HDAC7      |
| 4.07E-22 | 1 | CD34       |

|          |   |            |
|----------|---|------------|
| 4.76E-22 | 1 | RAB31      |
| 4.80E-22 | 1 | STK10      |
| 5.15E-22 | 1 | AFDN       |
| 5.28E-22 | 1 | F2RL3      |
| 5.93E-22 | 1 | PLAU       |
| 8.00E-22 | 1 | CD81       |
| 8.12E-22 | 1 | TCIM       |
| 8.18E-22 | 1 | OSBPL3     |
| 1.16E-21 | 1 | DOCK9      |
| 1.18E-21 | 1 | CASKIN2    |
| 1.45E-21 | 1 | COL15A1    |
| 1.46E-21 | 1 | ZEB1       |
| 1.53E-21 | 1 | JAM3       |
| 2.07E-21 | 1 | LRRC8A     |
| 2.28E-21 | 1 | NOX4       |
| 3.17E-21 | 1 | TRAK1      |
| 3.37E-21 | 1 | PICALM     |
| 3.52E-21 | 1 | DLEU2      |
| 4.47E-21 | 1 | TM4SF18    |
| 7.62E-21 | 1 | SORBS2     |
| 8.99E-21 | 1 | RANBP17    |
| 1.01E-20 | 1 | CDC14B     |
| 1.16E-20 | 1 | AC004889.1 |
| 1.16E-20 | 1 | GTF2I      |
| 1.19E-20 | 1 | ABL2       |
| 1.23E-20 | 1 | CDC42EP1   |
| 1.42E-20 | 1 | KIAA1671   |
| 1.59E-20 | 1 | FBXL7      |
| 1.67E-20 | 1 | MACF1      |
| 2.10E-20 | 1 | SOS1       |
| 2.43E-20 | 1 | MCAM       |
| 3.52E-20 | 1 | PDE8A      |
| 3.61E-20 | 1 | SMARCA2    |
| 4.12E-20 | 1 | DDIT4      |
| 5.00E-20 | 1 | ISG15      |
| 6.47E-20 | 1 | GJC1       |
| 6.73E-20 | 1 | RBFOX2     |
| 8.72E-20 | 1 | LRP6       |
| 1.04E-19 | 1 | RAMP2      |
| 1.06E-19 | 1 | NOS3       |
| 1.21E-19 | 1 | MMP14      |
| 1.43E-19 | 1 | ZNF532     |
| 1.50E-19 | 1 | ARAP3      |

|          |   |          |
|----------|---|----------|
| 1.54E-19 | 1 | GFOD1    |
| 2.03E-19 | 1 | INPP5A   |
| 2.83E-19 | 1 | PKD1L1   |
| 3.70E-19 | 1 | CHSY3    |
| 4.07E-19 | 1 | MAST4    |
| 4.15E-19 | 1 | NDST1    |
| 4.38E-19 | 1 | KIF13A   |
| 5.01E-19 | 1 | CD93     |
| 5.06E-19 | 1 | IGFBP5   |
| 6.44E-19 | 1 | CYTH3    |
| 6.97E-19 | 1 | ROBO4    |
| 9.61E-19 | 1 | CD109    |
| 9.97E-19 | 1 | CALD1    |
| 1.04E-18 | 1 | GIT2     |
| 1.04E-18 | 1 | LUZP1    |
| 1.08E-18 | 1 | SH3PXD2A |
| 1.18E-18 | 1 | TOX2     |
| 1.33E-18 | 1 | PTPRB    |
| 2.28E-18 | 1 | UTRN     |
| 2.57E-18 | 1 | FSCN1    |
| 2.72E-18 | 1 | PKIG     |
| 2.82E-18 | 1 | ADAM17   |
| 2.87E-18 | 1 | LPP      |
| 2.91E-18 | 1 | MYO10    |
| 3.17E-18 | 1 | GRPEL2   |
| 3.35E-18 | 1 | FUT8     |
| 3.38E-18 | 1 | DAB2IP   |
| 3.75E-18 | 1 | DOCK1    |
| 3.81E-18 | 1 | ZDHHC20  |
| 4.12E-18 | 1 | CMTM8    |
| 4.17E-18 | 1 | CDC42BPA |
| 4.24E-18 | 1 | TBCD     |
| 4.38E-18 | 1 | JAG1     |
| 6.81E-18 | 1 | DDI2     |
| 7.57E-18 | 1 | CALM1    |
| 9.60E-18 | 1 | CYTOR    |
| 9.61E-18 | 1 | SPRED2   |
| 1.06E-17 | 1 | PCDH1    |
| 1.37E-17 | 1 | PTPRE    |
| 1.49E-17 | 1 | CYYR1    |
| 1.98E-17 | 1 | NSD1     |
| 2.05E-17 | 1 | UBE2J1   |
| 2.10E-17 | 1 | PLD1     |

|          |   |          |
|----------|---|----------|
| 2.21E-17 | 1 | MYO1E    |
| 2.68E-17 | 1 | PXDN     |
| 2.69E-17 | 1 | KLHL24   |
| 2.80E-17 | 1 | OAF      |
| 3.27E-17 | 1 | CALCRL   |
| 3.40E-17 | 1 | SOX13    |
| 4.00E-17 | 1 | PHLPP1   |
| 4.17E-17 | 1 | SWAP70   |
| 4.39E-17 | 1 | SLC26A2  |
| 5.05E-17 | 1 | APLP2    |
| 5.97E-17 | 1 | EIF4G2   |
| 7.18E-17 | 1 | EOGT     |
| 7.56E-17 | 1 | NOVA2    |
| 7.70E-17 | 1 | ARHGAP18 |
| 8.34E-17 | 1 | CRYBG3   |
| 9.15E-17 | 1 | SLC5A4   |
| 9.23E-17 | 1 | COL18A1  |
| 1.20E-16 | 1 | EIF4G3   |
| 1.29E-16 | 1 | SH2D3C   |
| 1.54E-16 | 1 | YEATS2   |
| 1.63E-16 | 1 | PLCG1    |
| 1.85E-16 | 1 | TEK      |
| 2.08E-16 | 1 | PRKY     |
| 2.14E-16 | 1 | ARHGEF7  |
| 2.23E-16 | 1 | VSIR     |
| 2.24E-16 | 1 | NEBL     |
| 2.27E-16 | 1 | ITGA6    |
| 2.47E-16 | 1 | AGAP1    |
| 2.59E-16 | 1 | APLNR    |
| 2.77E-16 | 1 | REST     |
| 3.10E-16 | 1 | MAP4K3   |
| 3.12E-16 | 1 | ADAM10   |
| 3.58E-16 | 1 | HES4     |
| 4.41E-16 | 1 | WDFY1    |
| 4.51E-16 | 1 | CLEC14A  |
| 4.80E-16 | 1 | LIMS2    |
| 5.04E-16 | 1 | VOPP1    |
| 5.60E-16 | 1 | HYAL2    |
| 6.54E-16 | 1 | DCLK2    |
| 6.64E-16 | 1 | TIMP3    |
| 9.03E-16 | 1 | NID1     |
| 9.23E-16 | 1 | PTBP2    |
| 1.10E-15 | 1 | TSPAN13  |

|          |   |          |
|----------|---|----------|
| 1.21E-15 | 1 | PLPP3    |
| 1.21E-15 | 1 | SRGAP2   |
| 1.55E-15 | 1 | HIP1R    |
| 1.72E-15 | 1 | XAF1     |
| 2.21E-15 | 1 | CRIP1    |
| 2.46E-15 | 1 | ULK4     |
| 2.53E-15 | 1 | RB1      |
| 2.64E-15 | 1 | PKN1     |
| 2.66E-15 | 1 | ADD1     |
| 2.81E-15 | 1 | ABCG1    |
| 3.02E-15 | 1 | MSX1     |
| 3.34E-15 | 1 | NAV2     |
| 3.43E-15 | 1 | GLG1     |
| 3.50E-15 | 1 | NEK7     |
| 5.14E-15 | 1 | MAP4K4   |
| 6.13E-15 | 1 | SPRED1   |
| 6.69E-15 | 1 | CC2D2B   |
| 6.96E-15 | 1 | ASS1     |
| 7.00E-15 | 1 | INPP5D   |
| 7.37E-15 | 1 | SHANK3   |
| 8.16E-15 | 1 | FN1      |
| 9.95E-15 | 1 | BCAS3    |
| 1.01E-14 | 1 | PLS3     |
| 1.05E-14 | 1 | FAM214A  |
| 1.06E-14 | 1 | ARHGAP24 |
| 1.13E-14 | 1 | ITGA5    |
| 1.16E-14 | 1 | TAOK1    |
| 1.41E-14 | 1 | TMEM47   |
| 1.53E-14 | 1 | CPNE2    |
| 1.68E-14 | 1 | NREP     |
| 2.24E-14 | 1 | ZMIZ1    |
| 2.26E-14 | 1 | PELI1    |
| 2.43E-14 | 1 | DAB2     |
| 2.80E-14 | 1 | EPHA4    |
| 3.09E-14 | 1 | COL6A2   |
| 3.43E-14 | 1 | MPZL1    |
| 3.46E-14 | 1 | CDK19    |
| 3.53E-14 | 1 | CDC27    |
| 4.14E-14 | 1 | SMAD2    |
| 4.20E-14 | 1 | NPTN     |
| 4.87E-14 | 1 | COL21A1  |
| 5.16E-14 | 1 | TMEM150C |
| 5.71E-14 | 1 | KIAA1217 |

|          |   |          |
|----------|---|----------|
| 6.58E-14 | 1 | CADPS2   |
| 6.71E-14 | 1 | BCL6B    |
| 7.06E-14 | 1 | NAA38    |
| 7.06E-14 | 1 | FAM53B   |
| 7.92E-14 | 1 | MTSS1    |
| 8.36E-14 | 1 | SIPA1L3  |
| 8.95E-14 | 1 | ABCB1    |
| 1.10E-13 | 1 | TSPAN14  |
| 1.19E-13 | 1 | EHD4     |
| 1.26E-13 | 1 | PIAS2    |
| 1.29E-13 | 1 | PITPNM2  |
| 1.29E-13 | 1 | PKN3     |
| 1.42E-13 | 1 | TACC2    |
| 1.44E-13 | 1 | ACVRL1   |
| 1.64E-13 | 1 | NOTCH1   |
| 1.83E-13 | 1 | PTPN12   |
| 1.88E-13 | 1 | DIAPH2   |
| 2.08E-13 | 1 | DENND3   |
| 2.27E-13 | 1 | ARHGAP5  |
| 3.14E-13 | 1 | PLEKHA1  |
| 3.28E-13 | 1 | ARHGAP31 |
| 3.70E-13 | 1 | EMCN     |
| 3.74E-13 | 1 | TBC1D9   |
| 3.83E-13 | 1 | NEAT1    |
| 3.90E-13 | 1 | ERC1     |
| 4.11E-13 | 1 | PIK3C2B  |
| 4.47E-13 | 1 | BMP6     |
| 4.63E-13 | 1 | DISC1    |
| 4.95E-13 | 1 | NUMB     |
| 5.19E-13 | 1 | ATXN1    |
| 5.92E-13 | 1 | IL32     |
| 7.59E-13 | 1 | YES1     |
| 8.60E-13 | 1 | HBEGF    |
| 1.01E-12 | 1 | MGAT4A   |
| 1.40E-12 | 1 | SNX29    |
| 1.48E-12 | 1 | SPIRE1   |
| 1.51E-12 | 1 | ADGRG1   |
| 1.86E-12 | 1 | SRGAP2B  |
| 2.07E-12 | 1 | HPCAL1   |
| 2.21E-12 | 1 | SYT11    |
| 2.24E-12 | 1 | PRKX     |
| 2.29E-12 | 1 | SH3TC1   |
| 2.58E-12 | 1 | LRCH1    |

|          |   |          |
|----------|---|----------|
| 2.74E-12 | 1 | CLSTN1   |
| 3.04E-12 | 1 | ADAMTSL1 |
| 3.05E-12 | 1 | PRKD1    |
| 3.11E-12 | 1 | CTIF     |
| 3.21E-12 | 1 | GAS6     |
| 3.32E-12 | 1 | EIF2AK4  |
| 3.65E-12 | 1 | ADIPOR2  |
| 3.83E-12 | 1 | CALU     |
| 4.42E-12 | 1 | LIMCH1   |
| 5.44E-12 | 1 | SH3PXD2B |
| 7.68E-12 | 1 | UBE4B    |
| 9.03E-12 | 1 | RFTN1    |
| 9.77E-12 | 1 | SPG7     |
| 1.05E-11 | 1 | SMAD7    |
| 1.09E-11 | 1 | FRMD4B   |
| 1.13E-11 | 1 | TCF7L1   |
| 1.21E-11 | 1 | CCDC85B  |
| 1.34E-11 | 1 | TLE3     |
| 1.64E-11 | 1 | CDK2AP1  |
| 1.73E-11 | 1 | ADGRL2   |
| 1.91E-11 | 1 | SLC44A2  |
| 1.95E-11 | 1 | ARHGEF10 |
| 2.03E-11 | 1 | SORBS1   |
| 2.07E-11 | 1 | RNF144A  |
| 2.15E-11 | 1 | TMCC1    |
| 2.20E-11 | 1 | ENTPD1   |
| 2.47E-11 | 1 | PLCG2    |
| 2.50E-11 | 1 | JAZF1    |
| 2.61E-11 | 1 | XPR1     |
| 2.63E-11 | 1 | TJP2     |
| 2.79E-11 | 1 | RUNDC3B  |
| 3.02E-11 | 1 | ELK3     |
| 3.32E-11 | 1 | TAX1BP3  |
| 3.92E-11 | 1 | TCF4     |
| 4.05E-11 | 1 | WWC2     |
| 4.28E-11 | 1 | PIK3R3   |
| 7.75E-11 | 1 | PAPSS1   |
| 7.86E-11 | 1 | MAGI1    |
| 8.33E-11 | 1 | FOXN3    |
| 8.46E-11 | 1 | RASAL2   |
| 8.85E-11 | 1 | FKBP9    |
| 9.04E-11 | 1 | KITLG    |
| 9.14E-11 | 1 | EEPD1    |

|          |   |          |
|----------|---|----------|
| 1.00E-10 | 1 | MAML2    |
| 1.11E-10 | 1 | RNF144B  |
| 1.24E-10 | 1 | MPRIIP   |
| 1.24E-10 | 1 | ZNF827   |
| 1.33E-10 | 1 | LRRC8C   |
| 1.33E-10 | 1 | ATP2A2   |
| 1.42E-10 | 1 | RHOC     |
| 1.69E-10 | 1 | FAT4     |
| 2.18E-10 | 1 | SMURF2   |
| 2.32E-10 | 1 | CLASP2   |
| 2.39E-10 | 1 | NEDD4L   |
| 2.40E-10 | 1 | HMOX2    |
| 2.40E-10 | 1 | LBH      |
| 2.40E-10 | 1 | ADCY4    |
| 2.65E-10 | 1 | MCC      |
| 2.85E-10 | 1 | FNDC3B   |
| 3.11E-10 | 1 | QKI      |
| 3.14E-10 | 1 | NRP1     |
| 3.17E-10 | 1 | EPAS1    |
| 3.31E-10 | 1 | WWTR1    |
| 3.49E-10 | 1 | WWC3     |
| 3.71E-10 | 1 | TTYH3    |
| 4.47E-10 | 1 | PDS5B    |
| 4.76E-10 | 1 | HS2ST1   |
| 4.89E-10 | 1 | DYNC1H1  |
| 4.91E-10 | 1 | CTNND1   |
| 5.19E-10 | 1 | PALMD    |
| 5.48E-10 | 1 | DST      |
| 5.95E-10 | 1 | RABGAP1  |
| 6.31E-10 | 1 | RC3H2    |
| 6.57E-10 | 1 | CCDC88C  |
| 6.68E-10 | 1 | PPP1R13B |
| 6.79E-10 | 1 | ANKRD50  |
| 7.82E-10 | 1 | DIP2B    |
| 8.15E-10 | 1 | OLFML2A  |
| 9.17E-10 | 1 | PPP3CC   |
| 1.11E-09 | 1 | RHOB     |
| 1.13E-09 | 1 | CHSY1    |
| 1.26E-09 | 1 | SLC2A13  |
| 1.37E-09 | 1 | TOP2B    |
| 1.43E-09 | 1 | FCHO2    |
| 1.53E-09 | 1 | TPM1     |
| 1.61E-09 | 1 | ZBTB46   |



|          |   |            |
|----------|---|------------|
| 1.64E-09 | 1 | EFCAB14    |
| 1.68E-09 | 1 | CLIC4      |
| 1.76E-09 | 1 | ZNF704     |
| 1.88E-09 | 1 | HIPK2      |
| 1.88E-09 | 1 | NCKAP1     |
| 1.93E-09 | 1 | ERBIN      |
| 2.11E-09 | 1 | RALA       |
| 2.15E-09 | 1 | GRK5       |
| 2.23E-09 | 1 | AL139383.1 |
| 2.39E-09 | 1 | FADS3      |
| 2.45E-09 | 1 | UNC13B     |
| 2.60E-09 | 1 | UBR3       |
| 2.76E-09 | 1 | ABLIM2     |
| 3.24E-09 | 1 | MAP4K3-DT  |
| 3.59E-09 | 1 | UPF3A      |
| 3.67E-09 | 1 | EGFL7      |
| 3.83E-09 | 1 | ANKRD11    |
| 4.40E-09 | 1 | GPHN       |
| 4.42E-09 | 1 | COP1       |
| 4.53E-09 | 1 | ARHGEF28   |
| 4.78E-09 | 1 | KLHL18     |
| 5.44E-09 | 1 | DENND5A    |
| 6.12E-09 | 1 | FRYL       |
| 6.15E-09 | 1 | CCNY       |
| 6.44E-09 | 1 | BIRC6      |
| 7.73E-09 | 1 | TTC37      |
| 8.26E-09 | 1 | ZNF148     |
| 8.34E-09 | 1 | MEF2C      |
| 8.44E-09 | 1 | MAGI3      |
| 8.77E-09 | 1 | MAD1L1     |
| 9.48E-09 | 1 | ANKRD28    |
| 1.41E-08 | 1 | ST8SIA4    |
| 1.42E-08 | 1 | CLASP1     |
| 2.56E-08 | 1 | PTPN4      |
| 2.65E-08 | 1 | NPC1       |
| 2.90E-08 | 1 | SPATA6     |
| 3.31E-08 | 1 | OPHN1      |
| 3.89E-08 | 1 | AOPEP      |
| 3.95E-08 | 1 | GOLIM4     |
| 4.06E-08 | 1 | JARID2     |
| 5.60E-08 | 1 | LINC00472  |
| 5.70E-08 | 1 | EXOC6B     |
| 6.53E-08 | 1 | MMRN2      |

|          |   |             |
|----------|---|-------------|
| 6.89E-08 | 1 | PRRC2B      |
| 7.22E-08 | 1 | CTTNBP2NL   |
| 8.97E-08 | 1 | IVNS1ABP    |
| 8.98E-08 | 1 | EDNRB       |
| 9.05E-08 | 1 | LMBR1       |
| 1.06E-07 | 1 | ATXN2       |
| 1.18E-07 | 1 | SPTBN1      |
| 1.43E-07 | 1 | MGAT5       |
| 1.55E-07 | 1 | UBE2H       |
| 1.91E-07 | 1 | LGALS1      |
| 2.15E-07 | 1 | TRIM2       |
| 2.30E-07 | 1 | PBX3        |
| 2.44E-07 | 1 | MGMT        |
| 2.47E-07 | 1 | ZHX3        |
| 3.52E-07 | 1 | EMP1        |
| 3.56E-07 | 1 | IQCJ-SCHIP1 |
| 3.57E-07 | 1 | KLHL29      |
| 3.77E-07 | 1 | RAB11FIP3   |
| 3.77E-07 | 1 | NLK         |
| 5.27E-07 | 1 | CEP350      |
| 5.54E-07 | 1 | LDB2        |
| 6.30E-07 | 1 | DPYSL3      |
| 7.07E-07 | 1 | FBXW7       |
| 8.51E-07 | 1 | BDKRB2      |
| 1.09E-06 | 1 | ITCH        |
| 1.10E-06 | 1 | PGM2L1      |
| 1.21E-06 | 1 | IFI27       |
| 1.22E-06 | 1 | NRIP1       |
| 1.24E-06 | 1 | ZFYVE28     |
| 1.34E-06 | 1 | FBXL20      |
| 1.82E-06 | 1 | ATXN7L1     |
| 1.84E-06 | 1 | VEGFC       |
| 2.49E-06 | 1 | STARD13     |
| 2.67E-06 | 1 | CSGALNACT1  |
| 3.14E-06 | 1 | TNKS        |
| 3.47E-06 | 1 | WWOX        |
| 4.89E-06 | 1 | THSD7A      |
| 5.09E-06 | 1 | GBE1        |
| 5.36E-06 | 1 | TJP1        |
| 6.92E-06 | 1 | MAP4        |
| 9.18E-06 | 1 | ZNF407      |
| 9.35E-06 | 1 | BTBD3       |
| 1.13E-05 | 1 | NR2C2       |

|             |   |            |
|-------------|---|------------|
| 1.36E-05    | 1 | RGL1       |
| 1.46E-05    | 1 | TANC1      |
| 3.04E-05    | 1 | NRP2       |
| 3.94E-05    | 1 | MIDN       |
| 4.55E-05    | 1 | GAB1       |
| 8.20E-05    | 1 | RBMS3      |
| 9.61E-05    | 1 | SRPK2      |
| 0.000136767 | 1 | SOX4       |
| 0.000155211 | 1 | DACH1      |
| 0.000166078 | 1 | FSTL1      |
| 0.000174202 | 1 | IFI6       |
| 0.000175742 | 1 | PTPRJ      |
| 0.00018232  | 1 | NFIB       |
| 0.000291543 | 1 | RAPGEF4    |
| 0.000459131 | 1 | NUDT4      |
| 0.000515707 | 1 | SRP14      |
| 0.000736742 | 1 | CASC15     |
| 0.000841688 | 1 | CACHD1     |
| 0.000858896 | 1 | FLNB       |
| 0.001570896 | 1 | LNK1       |
| 0.002000816 | 1 | ATP13A3    |
| 0.003062021 | 1 | PAPSS2     |
| 0.003141729 | 1 | DLC1       |
| 0.013795012 | 1 | CD320      |
| 0.022846628 | 1 | PRSS23     |
| 0.038192025 | 1 | PLEKHG1    |
| 0.052124266 | 1 | MTOR       |
| 0.058873934 | 1 | HMCN1      |
| 0.172563735 | 1 | FILIP1     |
| 0.290076212 | 1 | CRADD      |
| 0.580742558 | 1 | NR5A2      |
| 0.862174855 | 1 | CCDC85A    |
| 1           | 1 | EMP3       |
| 1           | 1 | PPARG      |
| 1           | 1 | SYNJ2      |
| 1           | 1 | S100A4     |
| 1           | 1 | SLC2A3     |
| 1           | 1 | DEPP1      |
| 1           | 1 | SULF1      |
| 1           | 1 | AL583785.1 |
| 3.56E-47    | 2 | CCL21      |
| 5.69E-46    | 2 | MPP7       |
| 8.06E-34    | 2 | MAF        |

|             |   |           |
|-------------|---|-----------|
| 1.56E-28    | 2 | TC2N      |
| 4.64E-21    | 2 | FTH1      |
| 4.15E-17    | 2 | FTL       |
| 1.28E-13    | 2 | RAB11FIP1 |
| 2.53E-11    | 2 | LAPTM5    |
| 7.27E-08    | 2 | FAM107B   |
| 5.24E-06    | 2 | TSPAN5    |
| 7.16E-06    | 2 | VAV3      |
| 5.67E-05    | 2 | OAZ1      |
| 6.08E-05    | 2 | DDX46     |
| 9.29E-05    | 2 | B2M       |
| 9.76E-05    | 2 | CNOT6L    |
| 0.000193763 | 2 | GYPC      |
| 0.000320561 | 2 | EIF1      |
| 0.000774742 | 2 | ATP5F1E   |
| 0.00139899  | 2 | GNG10     |
| 0.001483164 | 2 | PPM1B     |
| 0.001599124 | 2 | PPFIBP1   |
| 0.004307968 | 2 | UBA52     |
| 0.005333381 | 2 | CHCHD10   |
| 0.007827261 | 2 | ACTB      |
| 0.01754344  | 2 | FAU       |
| 0.021030945 | 2 | RBP1      |
| 0.027282475 | 2 | CLEC2B    |
| 0.027834874 | 2 | SELENOS   |
| 0.029659758 | 2 | RPN2      |
| 0.031531302 | 2 | ATOX1     |
| 0.032609725 | 2 | CMSS1     |
| 0.039227091 | 2 | SMCHD1    |
| 0.04822561  | 2 | EEF1A1    |
| 0.071502859 | 2 | TCEAL4    |
| 0.073354989 | 2 | LARS      |
| 0.084601242 | 2 | LAP3      |
| 0.094136331 | 2 | MYL6      |
| 0.140835583 | 2 | ZMYM2     |
| 0.167724949 | 2 | MYDGF     |
| 0.178613495 | 2 | RCN2      |
| 0.190908338 | 2 | ERCC1     |
| 0.254498491 | 2 | THSD4     |
| 0.259999219 | 2 | TPT1      |
| 0.297811286 | 2 | RAB1A     |
| 0.304560414 | 2 | GNAS      |
| 0.338247941 | 2 | SNRPF     |

|             |   |          |
|-------------|---|----------|
| 0.346043553 | 2 | TRIOBP   |
| 0.35071995  | 2 | CD46     |
| 0.38784246  | 2 | HNRNPH3  |
| 0.416711718 | 2 | PYURF    |
| 0.529464885 | 2 | PFKL     |
| 0.578572301 | 2 | NPM1     |
| 0.612079814 | 2 | H3F3A    |
| 0.774119627 | 2 | RALBP1   |
| 0.920477338 | 2 | MCFD2    |
| 0.941684886 | 2 | SSR3     |
| 0.995412609 | 2 | ARHGDIB  |
| 1           | 2 | TAF1D    |
| 1           | 2 | LGALS1   |
| 1           | 2 | KLF12    |
| 1           | 2 | PHF20L1  |
| 1           | 2 | ACTR2    |
| 1           | 2 | SLC38A1  |
| 1           | 2 | TMEM179B |
| 1           | 2 | TIMM9    |
| 1           | 2 | NRN1     |
| 1           | 2 | TXNDC17  |
| 1           | 2 | IFT20    |
| 1           | 2 | HEBP2    |
| 1           | 2 | DDX1     |
| 1           | 2 | PPM1G    |
| 1           | 2 | S100A10  |
| 1           | 2 | OCIAD2   |
| 1           | 2 | PFDN1    |
| 1           | 2 | TSPAN3   |
| 1           | 2 | PDCD5    |
| 1           | 2 | PSMA6    |
| 1           | 2 | VIM      |
| 1           | 2 | NDUFB1   |
| 1           | 2 | TMEM88   |
| 1           | 2 | NAA38    |
| 1           | 2 | NDUFA8   |
| 1           | 2 | NDUFB9   |
| 1           | 2 | SMAP2    |
| 1           | 2 | TRIM38   |
| 1           | 2 | METTL9   |
| 1           | 2 | LMAN1    |
| 1           | 2 | SCP2     |
| 1           | 2 | TMSB10   |

|   |   |           |
|---|---|-----------|
| 1 | 2 | GNG5      |
| 1 | 2 | MRPL51    |
| 1 | 2 | TKT       |
| 1 | 2 | ROMO1     |
| 1 | 2 | ARPC4     |
| 1 | 2 | PPP1R14B  |
| 1 | 2 | HES1      |
| 1 | 2 | SBDS      |
| 1 | 2 | TBRG1     |
| 1 | 2 | GET3      |
| 1 | 2 | SLC25A5   |
| 1 | 2 | PTMA      |
| 1 | 2 | FAM32A    |
| 1 | 2 | HDAC1     |
| 1 | 2 | MMP2      |
| 1 | 2 | CFL1      |
| 1 | 2 | CHMP5     |
| 1 | 2 | LAMP1     |
| 1 | 2 | EML4      |
| 1 | 2 | SNHG16    |
| 1 | 2 | SMIM30    |
| 1 | 2 | HYAL2     |
| 1 | 2 | MAP1LC3A  |
| 1 | 2 | TMSB4X    |
| 1 | 2 | SYF2      |
| 1 | 2 | BRD2      |
| 1 | 2 | LINC01619 |
| 1 | 2 | PFDN4     |
| 1 | 2 | NOP10     |
| 1 | 2 | LSM8      |
| 1 | 2 | KDEL2     |
| 1 | 2 | NDUFB4    |
| 1 | 2 | FKBP3     |
| 1 | 2 | GDI2      |
| 1 | 2 | FILIP1L   |
| 1 | 2 | HHEX      |
| 1 | 2 | ATP5MD    |
| 1 | 2 | MRPL41    |
| 1 | 2 | CD151     |
| 1 | 2 | SERF2     |
| 1 | 2 | COX16     |
| 1 | 2 | XRCC6     |
| 1 | 2 | ARL2      |

|   |   |         |
|---|---|---------|
| 1 | 2 | COX7A1  |
| 1 | 2 | HADHB   |
| 1 | 2 | GAPDH   |
| 1 | 2 | FABP4   |
| 1 | 2 | KDELR1  |
| 1 | 2 | PSMD4   |
| 1 | 2 | ATF4    |
| 1 | 2 | FNBP1   |
| 1 | 2 | CANX    |
| 1 | 2 | TMEM123 |
| 1 | 2 | CTSL    |
| 1 | 2 | PSMA4   |
| 1 | 2 | STIP1   |
| 1 | 2 | NDUFA12 |
| 1 | 2 | CNPY2   |
| 1 | 2 | PPIA    |
| 1 | 2 | LDHB    |
| 1 | 2 | REEP3   |
| 1 | 2 | MICOS13 |
| 1 | 2 | HNRNPDL |
| 1 | 2 | ARF5    |
| 1 | 2 | NACA    |
| 1 | 2 | SHC1    |
| 1 | 2 | DBN1    |
| 1 | 2 | MRPL50  |
| 1 | 2 | PSMC3   |
| 1 | 2 | NDUFAB1 |
| 1 | 2 | WDR74   |
| 1 | 2 | ARPC5   |
| 1 | 2 | S100A4  |
| 1 | 2 | H1FX    |
| 1 | 2 | TMX4    |
| 1 | 2 | VPS35   |
| 1 | 2 | ALDH2   |
| 1 | 2 | MTIF3   |
| 1 | 2 | MTCH1   |
| 1 | 2 | STK17A  |
| 1 | 2 | RNH1    |
| 1 | 2 | EEF1G   |
| 1 | 2 | COPS9   |
| 1 | 2 | NCOA4   |
| 1 | 2 | BROX    |
| 1 | 2 | NSA2    |

|   |   |         |
|---|---|---------|
| 1 | 2 | LAMTOR1 |
| 1 | 2 | POMP    |
| 1 | 2 | HNRNPA0 |
| 1 | 2 | CTNNBL1 |
| 1 | 2 | UGP2    |
| 1 | 2 | ARF1    |
| 1 | 2 | PSMB1   |
| 1 | 2 | MAGED2  |
| 1 | 2 | PPIL4   |
| 1 | 2 | COX4I1  |
| 1 | 2 | ACYP2   |
| 1 | 2 | BEX3    |
| 1 | 2 | EIF3G   |
| 1 | 2 | NHP2    |
| 1 | 2 | BUD31   |
| 1 | 2 | LAPTM4A |
| 1 | 2 | PFN1    |
| 1 | 2 | PPHLN1  |
| 1 | 2 | DDRGK1  |
| 1 | 2 | BAX     |
| 1 | 2 | AAK1    |
| 1 | 2 | BTG3    |
| 1 | 2 | EIF3D   |
| 1 | 2 | CHMP2A  |
| 1 | 2 | CYBA    |
| 1 | 2 | VAMP5   |
| 1 | 2 | PSMB5   |
| 1 | 2 | HAX1    |
| 1 | 2 | CYB5R3  |
| 1 | 2 | EIF3L   |
| 1 | 2 | TBCB    |
| 1 | 2 | HLA-A   |
| 1 | 2 | UFC1    |
| 1 | 2 | SSB     |
| 1 | 2 | FKBP1A  |
| 1 | 2 | CIB1    |
| 1 | 2 | DDIT4   |
| 1 | 2 | PEA15   |
| 1 | 2 | CALM1   |
| 1 | 2 | NHSL1   |
| 1 | 2 | DUT     |
| 1 | 2 | SMIM26  |
| 1 | 2 | TGFB1I1 |



|   |   |          |
|---|---|----------|
| 1 | 2 | EIF3M    |
| 1 | 2 | NAP1L4   |
| 1 | 2 | NRP2     |
| 1 | 2 | FXYD5    |
| 1 | 2 | ATP5F1B  |
| 1 | 2 | MXRA7    |
| 1 | 2 | COX5A    |
| 1 | 2 | SRP19    |
| 1 | 2 | RHOC     |
| 1 | 2 | TPI1     |
| 1 | 2 | COX17    |
| 1 | 2 | PHF11    |
| 1 | 2 | STOML2   |
| 1 | 2 | RRAS     |
| 1 | 2 | IFT74    |
| 1 | 2 | COMMD2   |
| 1 | 2 | RAB1B    |
| 1 | 2 | MRPL57   |
| 1 | 2 | CLNS1A   |
| 1 | 2 | ATP5PB   |
| 1 | 2 | RBM3     |
| 1 | 2 | ARL4A    |
| 1 | 2 | SLC22A23 |
| 1 | 2 | CBX4     |
| 1 | 2 | RWDD1    |
| 1 | 2 | COMT     |
| 1 | 2 | TMEM256  |
| 1 | 2 | SKP1     |
| 1 | 2 | IER5L    |
| 1 | 2 | NUCKS1   |
| 1 | 2 | EIF5A    |
| 1 | 2 | RPAIN    |
| 1 | 2 | TOPBP1   |
| 1 | 2 | ESD      |
| 1 | 2 | IFITM3   |
| 1 | 2 | MARCKS   |
| 1 | 2 | SRGN     |
| 1 | 2 | RNF7     |
| 1 | 2 | ATP5MF   |
| 1 | 2 | YWHAZ    |
| 1 | 2 | SET      |
| 1 | 2 | TM4SF18  |
| 1 | 2 | COA1     |

|   |   |          |
|---|---|----------|
| 1 | 2 | GIMAP7   |
| 1 | 2 | SUMO3    |
| 1 | 2 | PSMB2    |
| 1 | 2 | CARD16   |
| 1 | 2 | HMGN2    |
| 1 | 2 | COX5B    |
| 1 | 2 | BANF1    |
| 1 | 2 | HRAS     |
| 1 | 2 | SNRPB    |
| 1 | 2 | TIMP2    |
| 1 | 2 | SNRPD1   |
| 1 | 2 | SARNP    |
| 1 | 2 | ABHD3    |
| 1 | 2 | CEBPZ    |
| 1 | 2 | ITGB1    |
| 1 | 2 | MDH2     |
| 1 | 2 | PSMD7    |
| 1 | 2 | AURKAIP1 |
| 1 | 2 | DYNLT1   |
| 1 | 2 | TRIM5    |
| 1 | 2 | DMAC1    |
| 1 | 2 | KRT10    |
| 1 | 2 | ZFAND2A  |
| 1 | 2 | MRPS21   |
| 1 | 2 | CALM3    |
| 1 | 2 | TMEM230  |
| 1 | 2 | MRPS15   |
| 1 | 2 | CHCHD1   |
